# Supplementary material for: DNA methylation is associated with lung function in never smokers
Source: Springer Nature journal article supplement (doi:10.1186/s12931-019-1222-8), 2019-12-01
Supplement: MOESM1 [file 17459804]

Online supplement table 1: Overview of all CpG-sites associated with FEV<sub>1</sub>/FVC at nominal p-value of 0.05.

| Study      | Meta   |       |          | LL COPD&C |       |          | LLDEEP  |        |          | RS-III-1 |       |          | RS-BIOS |       |          |
|------------|--------|-------|----------|-----------|-------|----------|---------|--------|----------|----------|-------|----------|---------|-------|----------|
|            | Beta   | SE    | P-value  | Beta      | SE    | P-value  | Beta    | SE     | P-value  | Beta     | SE    | P-value  | Beta    | SE    | P-value  |
| cg10012512 | -38.27 | 7.67  | 5.94E-07 | -45.54    | 12.14 | 1.76E-04 | -16.71  | 26.68  | 5.31E-01 | -33.86   | 15.33 | 2.72E-02 | -38.23  | 14.78 | 9.71E-03 |
| cg02885771 | 20.66  | 4.48  | 4.10E-06 | 21.53     | 8.76  | 1.40E-02 | 27.73   | 15.33  | 7.05E-02 | 21.95    | 6.05  | 2.86E-04 | 5.67    | 13.95 | 6.84E-01 |
| cg25105536 | -59.71 | 13.46 | 9.09E-06 | -76.36    | 44.35 | 8.51E-02 | -97.80  | 235.46 | 6.78E-01 | -54.41   | 14.81 | 2.38E-04 | -94.28  | 47.91 | 4.91E-02 |
| cg20102034 | 36.14  | 8.28  | 1.28E-05 | 42.57     | 15.29 | 5.35E-03 | 29.70   | 15.94  | 6.25E-02 | 40.85    | 14.65 | 5.29E-03 | 22.02   | 24.20 | 3.63E-01 |
| cg03703840 | 84.04  | 19.38 | 1.45E-05 | 100.48    | 42.84 | 1.90E-02 | -43.70  | 187.80 | 8.16E-01 | 88.13    | 23.36 | 1.61E-04 | 33.87   | 62.55 | 5.88E-01 |
| cg21614201 | -22.66 | 5.23  | 1.45E-05 | -28.17    | 13.55 | 3.76E-02 | -25.53  | 28.56  | 3.71E-01 | -21.10   | 6.11  | 5.58E-04 | -25.22  | 17.72 | 1.55E-01 |
| cg07957088 | 35.48  | 8.33  | 2.06E-05 | 49.48     | 15.72 | 1.64E-03 | 31.33   | 16.68  | 6.03E-02 | 38.68    | 13.97 | 5.62E-03 | -0.10   | 24.74 | 9.97E-01 |
| cg05304461 | -80.31 | 19.00 | 2.37E-05 | -95.35    | 36.04 | 8.16E-03 | 152.12  | 153.04 | 3.20E-01 | -82.63   | 25.66 | 1.28E-03 | -68.52  | 47.73 | 1.51E-01 |
| cg11749902 | -22.32 | 5.30  | 2.55E-05 | -26.22    | 7.75  | 7.17E-04 | -16.37  | 12.44  | 1.88E-01 | -12.69   | 14.61 | 3.85E-01 | -24.69  | 11.32 | 2.91E-02 |
| cg02207312 | 75.53  | 18.05 | 2.87E-05 | 79.32     | 53.44 | 1.38E-01 | -177.08 | 222.75 | 4.27E-01 | 77.18    | 20.22 | 1.35E-04 | 74.46   | 63.10 | 2.38E-01 |
| cg19734370 | 12.65  | 3.04  | 3.19E-05 | 12.29     | 4.11  | 2.76E-03 | 12.09   | 6.95   | 8.21E-02 | 9.23     | 8.85  | 2.97E-01 | 17.64   | 8.07  | 2.88E-02 |
| cg03077331 | 14.19  | 3.45  | 3.99E-05 | 16.08     | 4.94  | 1.14E-03 | 9.62    | 8.41   | 2.52E-01 | 29.01    | 16.49 | 7.85E-02 | 11.51   | 6.31  | 6.84E-02 |
| cg18387671 | -88.73 | 21.86 | 4.92E-05 | -110.71   | 69.61 | 1.12E-01 | 4.44    | 272.02 | 9.87E-01 | -87.37   | 24.33 | 3.30E-04 | -83.43  | 73.78 | 2.58E-01 |
| cg03224276 | 37.55  | 9.26  | 5.00E-05 | 52.17     | 19.25 | 6.73E-03 | 16.06   | 44.59  | 7.19E-01 | 28.97    | 11.60 | 1.25E-02 | 71.59   | 31.14 | 2.15E-02 |
| cg02137691 | 28.80  | 7.11  | 5.11E-05 | 13.24     | 13.60 | 3.30E-01 | 40.83   | 15.87  | 1.01E-02 | 35.10    | 10.64 | 9.74E-04 | 16.63   | 25.22 | 5.10E-01 |
| cg25884324 | -36.97 | 9.16  | 5.45E-05 | -42.03    | 19.42 | 3.05E-02 | -32.96  | 50.06  | 5.10E-01 | -35.47   | 11.31 | 1.71E-03 | -36.84  | 30.86 | 2.32E-01 |
| cg27158523 | -49.97 | 12.40 | 5.54E-05 | -62.31    | 22.65 | 5.94E-03 | -241.34 | 161.10 | 1.34E-01 | -37.48   | 14.71 | 1.09E-02 | -83.47  | 40.23 | 3.80E-02 |
| cg01157143 | -23.11 | 5.74  | 5.63E-05 | -31.05    | 15.70 | 4.80E-02 | -10.87  | 23.51  | 6.44E-01 | -24.64   | 6.82  | 3.03E-04 | -8.89   | 18.20 | 6.25E-01 |
| cg07160694 | 77.84  | 19.34 | 5.69E-05 | 63.24     | 40.81 | 1.21E-01 | 54.41   | 155.03 | 7.26E-01 | 73.37    | 27.79 | 8.29E-03 | 98.91   | 36.83 | 7.24E-03 |
| cg22127773 | -48.39 | 12.03 | 5.75E-05 | -58.63    | 19.17 | 2.22E-03 | 3.55    | 81.11  | 9.65E-01 | -56.26   | 21.72 | 9.60E-03 | -29.26  | 22.85 | 2.00E-01 |
| cg20939319 | -14.90 | 3.71  | 5.84E-05 | -17.12    | 8.37  | 4.07E-02 | -26.90  | 17.30  | 1.20E-01 | -13.61   | 4.55  | 2.80E-03 | -13.49  | 12.02 | 2.62E-01 |
| cg02206852 | 23.87  | 5.97  | 6.39E-05 | 28.18     | 16.23 | 8.24E-02 | 26.98   | 20.97  | 1.98E-01 | 22.38    | 7.02  | 1.45E-03 | 27.78   | 24.10 | 2.49E-01 |
| cg17075019 | 35.53  | 8.90  | 6.56E-05 | 49.59     | 13.38 | 2.12E-04 | 26.62   | 17.55  | 1.29E-01 | 13.65    | 25.97 | 5.99E-01 | 28.14   | 20.81 | 1.76E-01 |
| cg25556432 | 23.02  | 5.78  | 6.75E-05 | 25.96     | 8.69  | 2.82E-03 | 21.69   | 13.17  | 9.95E-02 | 32.14    | 17.96 | 7.36E-02 | 15.46   | 11.29 | 1.71E-01 |
| cg22742965 | -17.79 | 4.47  | 6.76E-05 | -24.96    | 11.10 | 2.45E-02 | 0.42    | 20.86  | 9.84E-01 | -17.82   | 5.43  | 1.03E-03 | -14.83  | 13.14 | 2.59E-01 |
| cg16734845 | -33.94 | 8.52  | 6.82E-05 | -54.67    | 21.90 | 1.26E-02 | -38.26  | 26.03  | 1.42E-01 | -31.88   | 10.86 | 3.32E-03 | -15.33  | 24.10 | 5.25E-01 |
| cg09108394 | -14.93 | 3.76  | 7.11E-05 | -16.43    | 8.33  | 4.84E-02 | -27.78  | 14.95  | 6.31E-02 | -14.34   | 4.92  | 3.55E-03 | -9.74   | 9.71  | 3.16E-01 |
| cg10034572 | -20.08 | 5.08  | 7.77E-05 | -19.86    | 13.39 | 1.38E-01 | -56.52  | 27.77  | 4.18E-02 | -19.29   | 5.90  | 1.09E-03 | -12.71  | 17.73 | 4.73E-01 |
| cg20066227 | 32.20  | 8.16  | 7.92E-05 | 26.51     | 18.29 | 1.47E-01 | 24.42   | 30.70  | 4.26E-01 | 40.00    | 10.35 | 1.12E-04 | 3.19    | 24.73 | 8.97E-01 |
| cg07148038 | 44.32  | 11.26 | 8.23E-05 | 51.79     | 16.72 | 1.95E-03 | 41.06   | 24.11  | 8.85E-02 | 55.29    | 30.47 | 6.96E-02 | 22.61   | 25.67 | 3.78E-01 |
| cg23396786 | 20.16  | 5.12  | 8.26E-05 | 22.48     | 7.68  | 3.43E-03 | 13.97   | 10.89  | 2.00E-01 | 45.93    | 18.48 | 1.30E-02 | 13.79   | 10.08 | 1.71E-01 |

|            |        |       |          |        |       |          |        |        |          |        |       |          |        |       |          |
|------------|--------|-------|----------|--------|-------|----------|--------|--------|----------|--------|-------|----------|--------|-------|----------|
| cg06218079 | 8.18   | 2.08  | 8.34E-05 | 5.68   | 3.00  | 5.79E-02 | 12.74  | 3.45   | 2.26E-04 | 3.33   | 8.96  | 7.10E-01 | 6.35   | 6.52  | 3.30E-01 |
| cg06982745 | -40.80 | 10.44 | 9.37E-05 | -36.77 | 18.57 | 4.77E-02 | 13.29  | 44.30  | 7.64E-01 | -48.83 | 14.67 | 8.71E-04 | -42.55 | 30.04 | 1.57E-01 |
| cg05946118 | -20.27 | 5.19  | 9.38E-05 | -17.24 | 6.98  | 1.35E-02 | -23.39 | 14.23  | 1.00E-01 | -25.24 | 13.56 | 6.28E-02 | -23.41 | 12.66 | 6.46E-02 |
| cg08065963 | -16.72 | 4.28  | 9.56E-05 | -18.12 | 5.84  | 1.93E-03 | -9.56  | 11.07  | 3.88E-01 | -29.63 | 11.66 | 1.10E-02 | -8.68  | 10.18 | 3.94E-01 |
| cg12064372 | 32.85  | 8.43  | 9.75E-05 | 48.15  | 18.52 | 9.33E-03 | 26.64  | 92.88  | 7.74E-01 | 31.50  | 10.10 | 1.81E-03 | 7.96   | 28.48 | 7.80E-01 |
| cg24551420 | 49.03  | 12.60 | 1.00E-04 | 1.67   | 40.99 | 9.67E-01 | 1.22   | 170.35 | 9.94E-01 | 52.05  | 13.80 | 1.61E-04 | 83.07  | 49.36 | 9.24E-02 |
| cg19390934 | -18.69 | 4.81  | 1.01E-04 | -17.37 | 7.46  | 1.98E-02 | -14.50 | 11.51  | 2.08E-01 | -22.01 | 11.40 | 5.35E-02 | -21.68 | 9.99  | 3.00E-02 |
| cg02737554 | -16.15 | 4.17  | 1.08E-04 | -28.44 | 8.38  | 6.88E-04 | -11.94 | 14.77  | 4.19E-01 | -11.47 | 5.71  | 4.45E-02 | -14.63 | 11.24 | 1.93E-01 |
| cg17920789 | -15.88 | 4.11  | 1.12E-04 | -29.31 | 10.27 | 4.34E-03 | -19.69 | 19.18  | 3.04E-01 | -14.20 | 4.97  | 4.28E-03 | -5.19  | 12.39 | 6.75E-01 |
| cg06960413 | 24.47  | 6.34  | 1.14E-04 | 39.41  | 11.95 | 9.74E-04 | 8.43   | 22.77  | 7.11E-01 | 21.51  | 8.88  | 1.55E-02 | 13.41  | 17.47 | 4.43E-01 |
| cg01459673 | 40.37  | 10.47 | 1.15E-04 | 20.12  | 42.53 | 6.36E-01 | 70.56  | 114.17 | 5.37E-01 | 40.64  | 11.12 | 2.58E-04 | 56.42  | 49.09 | 2.50E-01 |
| cg18485530 | -14.40 | 3.74  | 1.20E-04 | -5.85  | 9.14  | 5.22E-01 | -9.65  | 14.13  | 4.95E-01 | -17.92 | 4.58  | 9.03E-05 | -8.07  | 12.28 | 5.11E-01 |
| cg09547025 | -8.70  | 2.26  | 1.23E-04 | -4.65  | 4.26  | 2.75E-01 | -9.82  | 5.22   | 6.00E-02 | -9.46  | 3.51  | 7.06E-03 | -14.06 | 6.70  | 3.59E-02 |
| cg21647560 | -19.98 | 5.20  | 1.23E-04 | -20.13 | 7.93  | 1.11E-02 | -24.45 | 11.76  | 3.75E-02 | -18.59 | 15.86 | 2.41E-01 | -16.99 | 10.09 | 9.22E-02 |
| cg16672557 | 32.01  | 8.34  | 1.23E-04 | 56.78  | 18.52 | 2.18E-03 | 26.25  | 21.13  | 2.14E-01 | 25.85  | 11.07 | 1.95E-02 | 23.64  | 30.65 | 4.41E-01 |
| cg07476963 | -12.90 | 3.37  | 1.29E-04 | -12.85 | 6.49  | 4.76E-02 | -2.45  | 8.23   | 7.66E-01 | -15.60 | 4.99  | 1.77E-03 | -17.95 | 10.35 | 8.28E-02 |
| cg05888917 | 37.22  | 9.74  | 1.32E-04 | 48.46  | 27.85 | 8.18E-02 | -9.39  | 120.66 | 9.38E-01 | 34.42  | 10.88 | 1.56E-03 | 53.99  | 36.81 | 1.42E-01 |
| cg13205384 | 17.86  | 4.68  | 1.35E-04 | 0.13   | 14.95 | 9.93E-01 | 83.76  | 70.42  | 2.34E-01 | 18.99  | 5.12  | 2.08E-04 | 25.73  | 18.64 | 1.67E-01 |
| cg22069588 | 47.10  | 12.34 | 1.36E-04 | 43.08  | 14.77 | 3.54E-03 | -22.55 | 64.47  | 7.27E-01 | 6.69   | 77.60 | 9.31E-01 | 73.69  | 25.20 | 3.46E-03 |
| cg08445550 | -17.98 | 4.71  | 1.36E-04 | -21.51 | 7.08  | 2.39E-03 | -12.81 | 10.52  | 2.23E-01 | -13.63 | 12.10 | 2.60E-01 | -18.62 | 10.40 | 7.35E-02 |
| cg03870501 | 28.61  | 7.50  | 1.37E-04 | 40.25  | 16.17 | 1.28E-02 | 31.40  | 12.36  | 1.11E-02 | 22.42  | 13.27 | 9.10E-02 | 12.46  | 24.19 | 6.07E-01 |
| cg03645088 | -21.98 | 5.78  | 1.44E-04 | -2.70  | 18.86 | 8.86E-01 | -38.98 | 44.52  | 3.81E-01 | -24.87 | 6.31  | 8.18E-05 | -4.12  | 25.73 | 8.73E-01 |
| cg07425474 | 34.07  | 8.97  | 1.45E-04 | 55.07  | 15.60 | 4.16E-04 | 22.98  | 17.34  | 1.85E-01 | 27.53  | 16.52 | 9.56E-02 | 15.08  | 27.33 | 5.81E-01 |
| cg11362049 | -11.37 | 3.00  | 1.47E-04 | -15.17 | 5.25  | 3.83E-03 | -7.29  | 6.96   | 2.95E-01 | -8.15  | 4.80  | 8.97E-02 | -19.21 | 9.52  | 4.35E-02 |
| cg16253580 | -13.88 | 3.67  | 1.53E-04 | -23.13 | 8.68  | 7.72E-03 | -11.63 | 13.39  | 3.85E-01 | -12.83 | 4.59  | 5.14E-03 | -6.38  | 11.14 | 5.67E-01 |
| cg13245440 | -27.00 | 7.13  | 1.54E-04 | -27.86 | 13.70 | 4.20E-02 | -35.96 | 29.32  | 2.20E-01 | -27.22 | 9.52  | 4.24E-03 | -18.76 | 21.72 | 3.88E-01 |
| cg04997017 | -23.32 | 6.17  | 1.57E-04 | -40.59 | 16.36 | 1.31E-02 | -35.82 | 29.47  | 2.24E-01 | -18.02 | 7.11  | 1.13E-02 | -39.18 | 24.84 | 1.15E-01 |
| cg17095171 | -28.65 | 7.61  | 1.67E-04 | -41.33 | 19.57 | 3.47E-02 | -23.52 | 26.45  | 3.74E-01 | -28.60 | 9.16  | 1.79E-03 | -9.38  | 27.64 | 7.34E-01 |
| cg07020540 | 30.47  | 8.10  | 1.68E-04 | 28.43  | 13.58 | 3.63E-02 | 18.89  | 31.56  | 5.50E-01 | 27.57  | 11.51 | 1.66E-02 | 65.69  | 28.09 | 1.94E-02 |
| cg04338250 | 29.59  | 7.87  | 1.70E-04 | 42.51  | 14.94 | 4.43E-03 | 25.30  | 19.32  | 1.90E-01 | 14.47  | 13.21 | 2.73E-01 | 41.94  | 17.52 | 1.67E-02 |
| cg00019511 | 25.21  | 6.71  | 1.71E-04 | 37.46  | 17.70 | 3.43E-02 | 24.50  | 30.24  | 4.18E-01 | 23.06  | 7.80  | 3.13E-03 | 23.27  | 25.75 | 3.66E-01 |
| cg01986263 | -25.32 | 6.74  | 1.73E-04 | -33.58 | 10.86 | 1.99E-03 | -3.63  | 15.37  | 8.13E-01 | -28.30 | 16.53 | 8.70E-02 | -27.25 | 13.33 | 4.09E-02 |
| cg07598082 | -56.80 | 15.14 | 1.75E-04 | -48.45 | 22.71 | 3.29E-02 | 11.15  | 52.80  | 8.33E-01 | -64.47 | 28.60 | 2.42E-02 | -93.38 | 34.26 | 6.42E-03 |
| cg05331807 | -24.55 | 6.55  | 1.76E-04 | -23.54 | 10.13 | 2.02E-02 | -14.35 | 17.44  | 4.10E-01 | -35.52 | 16.59 | 3.23E-02 | -25.08 | 12.23 | 4.04E-02 |
| cg25302730 | -25.28 | 6.74  | 1.78E-04 | -4.00  | 18.92 | 8.33E-01 | -6.12  | 32.57  | 8.51E-01 | -29.21 | 7.64  | 1.31E-04 | -34.48 | 30.07 | 2.52E-01 |

|            |        |       |          |         |       |          |         |        |          |        |       |          |        |       |          |
|------------|--------|-------|----------|---------|-------|----------|---------|--------|----------|--------|-------|----------|--------|-------|----------|
| cg07280482 | 48.47  | 12.94 | 1.80E-04 | 68.31   | 40.67 | 9.30E-02 | -24.12  | 142.69 | 8.66E-01 | 45.43  | 14.33 | 1.53E-03 | 62.57  | 47.06 | 1.84E-01 |
| cg11677105 | 10.15  | 2.71  | 1.80E-04 | 6.88    | 3.81  | 7.13E-02 | 8.73    | 5.70   | 1.26E-01 | 17.07  | 9.43  | 7.02E-02 | 17.70  | 6.29  | 4.86E-03 |
| cg07909265 | 60.75  | 16.24 | 1.83E-04 | 54.97   | 20.13 | 6.31E-03 | 1.69    | 84.68  | 9.84E-01 | 167.41 | 72.18 | 2.04E-02 | 62.80  | 31.75 | 4.79E-02 |
| cg16526137 | 60.17  | 16.09 | 1.85E-04 | 52.25   | 53.55 | 3.29E-01 | -118.99 | 236.36 | 6.15E-01 | 65.39  | 17.88 | 2.56E-04 | 32.08  | 52.09 | 5.38E-01 |
| cg27554565 | 23.03  | 6.18  | 1.93E-04 | 5.24    | 23.76 | 8.25E-01 | -33.30  | 86.28  | 7.00E-01 | 26.04  | 6.65  | 9.02E-05 | 5.88   | 24.31 | 8.09E-01 |
| cg16016319 | 57.06  | 15.36 | 2.04E-04 | 53.97   | 20.95 | 9.99E-03 | 48.24   | 54.76  | 3.78E-01 | 59.32  | 45.46 | 1.92E-01 | 64.88  | 29.62 | 2.85E-02 |
| cg11143953 | 11.35  | 3.07  | 2.13E-04 | 10.80   | 4.83  | 2.53E-02 | 9.93    | 8.70   | 2.54E-01 | 12.20  | 5.29  | 2.11E-02 | 12.20  | 8.29  | 1.41E-01 |
| cg19983815 | 68.25  | 18.44 | 2.15E-04 | 123.19  | 53.47 | 2.12E-02 | -55.35  | 153.43 | 7.18E-01 | 69.27  | 20.71 | 8.21E-04 | -7.58  | 68.09 | 9.11E-01 |
| cg06532856 | -27.94 | 7.56  | 2.17E-04 | -40.16  | 11.82 | 6.84E-04 | -20.64  | 15.24  | 1.76E-01 | -36.69 | 21.76 | 9.18E-02 | -9.09  | 15.93 | 5.68E-01 |
| cg12977942 | -10.54 | 2.85  | 2.23E-04 | -6.65   | 5.02  | 1.85E-01 | -13.39  | 7.90   | 9.02E-02 | -13.18 | 4.56  | 3.89E-03 | -9.56  | 7.23  | 1.87E-01 |
| cg16455376 | -22.02 | 5.97  | 2.26E-04 | -28.49  | 10.04 | 4.52E-03 | -17.03  | 16.49  | 3.02E-01 | -24.07 | 10.11 | 1.73E-02 | -7.89  | 14.63 | 5.90E-01 |
| cg01110525 | 40.61  | 11.02 | 2.28E-04 | 72.62   | 42.04 | 8.41E-02 | -143.79 | 158.95 | 3.66E-01 | 40.00  | 11.77 | 6.76E-04 | 25.07  | 49.26 | 6.11E-01 |
| cg21776674 | 29.40  | 7.98  | 2.29E-04 | 32.09   | 12.97 | 1.34E-02 | 35.05   | 15.37  | 2.26E-02 | 13.47  | 18.23 | 4.60E-01 | 32.56  | 19.91 | 1.02E-01 |
| cg11914370 | 57.09  | 15.50 | 2.31E-04 | 67.46   | 19.35 | 4.91E-04 | 26.15   | 51.89  | 6.14E-01 | 40.20  | 61.22 | 5.11E-01 | 43.36  | 34.26 | 2.06E-01 |
| cg00328058 | 20.03  | 5.45  | 2.35E-04 | 17.49   | 7.96  | 2.81E-02 | 29.10   | 11.95  | 1.49E-02 | 15.37  | 18.55 | 4.08E-01 | 18.81  | 11.16 | 9.19E-02 |
| cg12392528 | 38.54  | 10.49 | 2.39E-04 | 55.74   | 28.55 | 5.09E-02 | 49.16   | 108.36 | 6.50E-01 | 35.99  | 11.94 | 2.59E-03 | 33.17  | 36.15 | 3.59E-01 |
| cg04153882 | -22.35 | 6.09  | 2.43E-04 | -26.97  | 8.79  | 2.15E-03 | -18.50  | 17.42  | 2.88E-01 | -24.91 | 14.21 | 7.96E-02 | -11.96 | 13.19 | 3.65E-01 |
| cg14981432 | 12.23  | 3.33  | 2.44E-04 | 8.76    | 5.56  | 1.15E-01 | 18.00   | 5.21   | 5.51E-04 | 13.29  | 10.35 | 1.99E-01 | 2.63   | 9.33  | 7.78E-01 |
| cg11486133 | 23.65  | 6.45  | 2.47E-04 | 30.75   | 9.14  | 7.69E-04 | 22.96   | 18.83  | 2.23E-01 | 22.39  | 21.55 | 2.99E-01 | 12.31  | 11.88 | 3.00E-01 |
| cg03806693 | -27.44 | 7.49  | 2.49E-04 | -17.02  | 16.67 | 3.07E-01 | -30.23  | 77.84  | 6.98E-01 | -26.71 | 8.90  | 2.70E-03 | -59.80 | 26.41 | 2.36E-02 |
| cg27124276 | 26.66  | 7.28  | 2.51E-04 | 36.12   | 13.62 | 8.00E-03 | 23.06   | 19.45  | 2.36E-01 | 18.06  | 9.14  | 4.80E-02 | 63.22  | 27.16 | 1.99E-02 |
| cg05012767 | -56.88 | 15.54 | 2.51E-04 | -38.06  | 58.87 | 5.18E-01 | 9.20    | 195.51 | 9.62E-01 | -61.28 | 16.57 | 2.17E-04 | -8.93  | 73.51 | 9.03E-01 |
| cg07059167 | 44.03  | 12.05 | 2.59E-04 | 58.28   | 30.89 | 5.92E-02 | 12.86   | 134.16 | 9.24E-01 | 43.91  | 13.73 | 1.38E-03 | 17.57  | 45.92 | 7.02E-01 |
| cg09276842 | -31.65 | 8.67  | 2.61E-04 | -46.51  | 14.52 | 1.36E-03 | -48.13  | 62.23  | 4.39E-01 | -35.45 | 18.49 | 5.52E-02 | -15.72 | 13.63 | 2.49E-01 |
| cg14896003 | 26.46  | 7.26  | 2.67E-04 | 39.74   | 16.25 | 1.45E-02 | 23.01   | 10.54  | 2.90E-02 | 19.35  | 15.11 | 2.00E-01 | 32.99  | 23.48 | 1.60E-01 |
| cg01311051 | 19.27  | 5.29  | 2.69E-04 | 21.05   | 6.85  | 2.12E-03 | 28.17   | 14.64  | 5.43E-02 | 19.99  | 19.28 | 3.00E-01 | 7.77   | 11.89 | 5.13E-01 |
| cg23998119 | 15.29  | 4.20  | 2.70E-04 | 22.01   | 6.61  | 8.74E-04 | 9.58    | 8.00   | 2.31E-01 | 12.20  | 11.42 | 2.85E-01 | 11.46  | 9.72  | 2.39E-01 |
| cg00682125 | -17.39 | 4.78  | 2.71E-04 | -16.76  | 13.22 | 2.05E-01 | -34.77  | 25.14  | 1.67E-01 | -16.23 | 5.46  | 2.96E-03 | -22.35 | 18.17 | 2.19E-01 |
| cg06423533 | -71.76 | 19.71 | 2.71E-04 | -146.88 | 58.48 | 1.20E-02 | -144.19 | 254.53 | 5.71E-01 | -65.40 | 22.05 | 3.02E-03 | -24.09 | 69.01 | 7.27E-01 |
| cg16624124 | -17.21 | 4.73  | 2.72E-04 | -24.51  | 11.40 | 3.16E-02 | -0.82   | 19.30  | 9.66E-01 | -18.70 | 5.80  | 1.25E-03 | -4.91  | 14.73 | 7.39E-01 |
| cg24951100 | 33.23  | 9.13  | 2.72E-04 | 39.17   | 12.63 | 1.93E-03 | 19.29   | 30.49  | 5.27E-01 | 52.06  | 35.43 | 1.42E-01 | 23.59  | 16.09 | 1.43E-01 |
| cg05265414 | -18.58 | 5.11  | 2.73E-04 | -16.78  | 11.75 | 1.53E-01 | -19.57  | 11.45  | 8.75E-02 | -20.95 | 7.41  | 4.70E-03 | -11.46 | 13.77 | 4.05E-01 |
| cg03454225 | 13.31  | 3.66  | 2.77E-04 | 20.61   | 7.38  | 5.21E-03 | 4.02    | 9.50   | 6.73E-01 | 10.69  | 5.24  | 4.12E-02 | 20.68  | 10.71 | 5.36E-02 |
| cg02326806 | 18.33  | 5.05  | 2.82E-04 | 16.36   | 13.79 | 2.36E-01 | 49.43   | 38.03  | 1.94E-01 | 14.80  | 5.91  | 1.23E-02 | 37.46  | 14.60 | 1.03E-02 |
| cg08066844 | 53.80  | 14.82 | 2.83E-04 | 73.14   | 39.32 | 6.29E-02 | -22.35  | 164.36 | 8.92E-01 | 52.50  | 16.82 | 1.81E-03 | 38.67  | 54.57 | 4.78E-01 |

|            |        |       |          |        |       |          |         |        |          |         |       |          |         |       |          |
|------------|--------|-------|----------|--------|-------|----------|---------|--------|----------|---------|-------|----------|---------|-------|----------|
| cg02265690 | 44.06  | 12.14 | 2.84E-04 | 51.62  | 21.19 | 1.48E-02 | -19.03  | 61.62  | 7.58E-01 | 33.48   | 16.13 | 3.79E-02 | 83.58   | 32.09 | 9.19E-03 |
| cg20399616 | 25.37  | 6.99  | 2.84E-04 | 20.49  | 24.88 | 4.10E-01 | -13.81  | 106.37 | 8.97E-01 | 25.90   | 7.69  | 7.61E-04 | 26.62   | 23.12 | 2.50E-01 |
| cg22330924 | -24.33 | 6.71  | 2.86E-04 | -22.70 | 10.00 | 2.32E-02 | -21.27  | 15.44  | 1.68E-01 | -36.38  | 16.94 | 3.18E-02 | -21.52  | 14.82 | 1.46E-01 |
| cg05658215 | 22.24  | 6.14  | 2.91E-04 | 40.16  | 17.36 | 2.07E-02 | 20.45   | 21.81  | 3.48E-01 | 17.10   | 7.26  | 1.84E-02 | 41.92   | 21.69 | 5.33E-02 |
| cg03613525 | 24.31  | 6.71  | 2.94E-04 | 19.18  | 11.15 | 8.54E-02 | -6.64   | 46.47  | 8.86E-01 | 26.86   | 9.08  | 3.08E-03 | 40.22   | 25.46 | 1.14E-01 |
| cg06698399 | -14.03 | 3.88  | 2.97E-04 | -12.45 | 6.56  | 5.74E-02 | -22.93  | 8.69   | 8.31E-03 | -13.13  | 7.00  | 6.05E-02 | -7.44   | 10.23 | 4.67E-01 |
| cg22706424 | -30.29 | 8.38  | 2.99E-04 | -43.18 | 26.39 | 1.02E-01 | -46.33  | 69.31  | 5.04E-01 | -24.87  | 9.38  | 8.00E-03 | -62.39  | 28.42 | 2.81E-02 |
| cg18815779 | 55.05  | 15.24 | 3.03E-04 | 82.80  | 33.02 | 1.22E-02 | -15.72  | 68.87  | 8.19E-01 | 53.92   | 19.29 | 5.19E-03 | 39.83   | 45.09 | 3.77E-01 |
| cg03657837 | -30.96 | 8.59  | 3.13E-04 | -30.68 | 13.50 | 2.31E-02 | -7.57   | 23.45  | 7.47E-01 | -45.85  | 19.73 | 2.02E-02 | -32.53  | 16.47 | 4.83E-02 |
| cg21131424 | 30.28  | 8.41  | 3.17E-04 | 37.77  | 12.27 | 2.09E-03 | 29.35   | 22.72  | 1.96E-01 | 15.48   | 14.85 | 2.97E-01 | 48.85   | 31.11 | 1.16E-01 |
| cg04214430 | -32.37 | 9.00  | 3.22E-04 | -48.35 | 13.59 | 3.73E-04 | -10.51  | 30.08  | 7.27E-01 | -35.25  | 14.92 | 1.81E-02 | -11.38  | 17.66 | 5.19E-01 |
| cg25433490 | -63.70 | 17.71 | 3.23E-04 | -72.08 | 46.67 | 1.22E-01 | -113.95 | 142.89 | 4.25E-01 | -49.84  | 19.19 | 9.39E-03 | -151.61 | 56.79 | 7.59E-03 |
| cg24879595 | 44.23  | 12.30 | 3.23E-04 | 40.03  | 30.00 | 1.82E-01 | 90.59   | 146.78 | 5.37E-01 | 46.53   | 14.29 | 1.13E-03 | 28.52   | 42.39 | 5.01E-01 |
| cg12238015 | 38.13  | 10.60 | 3.23E-04 | 41.68  | 14.03 | 2.98E-03 | 33.07   | 33.74  | 3.27E-01 | 65.39   | 37.26 | 7.93E-02 | 23.18   | 21.23 | 2.75E-01 |
| cg26933422 | 33.70  | 9.38  | 3.28E-04 | 59.63  | 30.42 | 5.00E-02 | 44.74   | 103.21 | 6.65E-01 | 28.54   | 10.16 | 4.96E-03 | 75.78   | 44.81 | 9.09E-02 |
| cg07621104 | -48.96 | 13.64 | 3.31E-04 | -22.44 | 44.31 | 6.13E-01 | -232.20 | 233.42 | 3.20E-01 | -52.89  | 15.07 | 4.51E-04 | -33.04  | 47.22 | 4.84E-01 |
| cg00757731 | 23.87  | 6.65  | 3.33E-04 | 33.82  | 23.75 | 1.54E-01 | 28.03   | 52.48  | 5.93E-01 | 23.33   | 7.29  | 1.37E-03 | 18.39   | 24.82 | 4.59E-01 |
| cg08663092 | -68.94 | 19.24 | 3.39E-04 | -80.85 | 52.17 | 1.21E-01 | -247.37 | 265.24 | 3.51E-01 | -74.71  | 21.78 | 6.02E-04 | 21.39   | 68.81 | 7.56E-01 |
| cg06394621 | -10.34 | 2.89  | 3.43E-04 | -9.24  | 5.33  | 8.32E-02 | -8.30   | 7.89   | 2.93E-01 | -11.49  | 4.25  | 6.92E-03 | -10.95  | 8.65  | 2.05E-01 |
| cg23672176 | -72.37 | 20.24 | 3.50E-04 | -58.26 | 54.29 | 2.83E-01 | 34.21   | 266.97 | 8.98E-01 | -77.76  | 23.04 | 7.38E-04 | -53.39  | 70.02 | 4.46E-01 |
| cg00890840 | 35.56  | 9.95  | 3.52E-04 | 42.40  | 37.72 | 2.61E-01 | 4.90    | 148.04 | 9.74E-01 | 35.60   | 10.61 | 7.91E-04 | 27.48   | 46.50 | 5.55E-01 |
| cg27579953 | 22.51  | 6.30  | 3.54E-04 | 26.90  | 31.89 | 3.99E-01 | 104.02  | 78.82  | 1.87E-01 | 21.90   | 6.67  | 1.03E-03 | 20.18   | 25.06 | 4.21E-01 |
| cg00175702 | 25.73  | 7.21  | 3.57E-04 | 29.83  | 11.64 | 1.04E-02 | 15.57   | 14.78  | 2.92E-01 | 29.95   | 13.71 | 2.90E-02 | 22.57   | 22.48 | 3.15E-01 |
| cg13862566 | 28.48  | 7.98  | 3.59E-04 | 16.69  | 14.50 | 2.50E-01 | 70.41   | 37.48  | 6.03E-02 | 29.62   | 10.36 | 4.26E-03 | 45.32   | 32.91 | 1.68E-01 |
| cg16580937 | -13.55 | 3.80  | 3.64E-04 | -7.14  | 9.79  | 4.66E-01 | -3.09   | 15.90  | 8.46E-01 | -13.38  | 4.63  | 3.87E-03 | -27.62  | 11.01 | 1.21E-02 |
| cg18679782 | 39.31  | 11.04 | 3.68E-04 | 32.32  | 28.75 | 2.61E-01 | 16.76   | 92.53  | 8.56E-01 | 46.07   | 12.86 | 3.39E-04 | 3.63    | 34.63 | 9.17E-01 |
| cg13715901 | 34.46  | 9.68  | 3.71E-04 | 24.83  | 13.80 | 7.20E-02 | 14.95   | 24.05  | 5.34E-01 | 37.79   | 25.12 | 1.33E-01 | 60.50   | 18.34 | 9.70E-04 |
| cg22631350 | -25.71 | 7.23  | 3.74E-04 | -11.77 | 21.39 | 5.82E-01 | -13.37  | 26.49  | 6.14E-01 | -27.81  | 8.28  | 7.81E-04 | -43.88  | 32.38 | 1.75E-01 |
| cg06368859 | 13.36  | 3.76  | 3.77E-04 | 14.39  | 7.26  | 4.74E-02 | 27.24   | 9.42   | 3.83E-03 | 8.33    | 4.66  | 7.42E-02 | 15.02   | 10.57 | 1.55E-01 |
| cg25439798 | -71.86 | 20.21 | 3.77E-04 | -66.66 | 26.60 | 1.22E-02 | 86.65   | 106.79 | 4.17E-01 | -103.06 | 50.08 | 3.96E-02 | -87.91  | 42.69 | 3.95E-02 |
| cg21908673 | -20.84 | 5.86  | 3.78E-04 | -24.23 | 12.87 | 5.96E-02 | 5.03    | 20.96  | 8.10E-01 | -18.99  | 6.07  | 1.77E-03 | -42.57  | 16.88 | 1.17E-02 |
| cg17481912 | 18.44  | 5.19  | 3.80E-04 | 20.10  | 7.11  | 4.72E-03 | 29.26   | 15.45  | 5.83E-02 | 23.10   | 16.92 | 1.72E-01 | 8.70    | 10.16 | 3.92E-01 |
| cg05996578 | 43.01  | 12.11 | 3.81E-04 | 45.24  | 43.81 | 3.02E-01 | 90.21   | 187.99 | 6.31E-01 | 46.03   | 13.11 | 4.48E-04 | -0.71   | 46.67 | 9.88E-01 |
| cg14503489 | -18.12 | 5.10  | 3.83E-04 | -27.02 | 7.34  | 2.32E-04 | -14.42  | 12.88  | 2.63E-01 | -8.62   | 12.47 | 4.89E-01 | -7.33   | 11.54 | 5.25E-01 |
| cg17088247 | -67.27 | 18.94 | 3.83E-04 | -31.24 | 53.50 | 5.59E-01 | 234.00  | 223.47 | 2.95E-01 | -74.11  | 21.50 | 5.68E-04 | -82.17  | 62.51 | 1.89E-01 |



|            |        |       |          |        |       |          |         |        |          |        |       |          |         |       |          |
|------------|--------|-------|----------|--------|-------|----------|---------|--------|----------|--------|-------|----------|---------|-------|----------|
| cg16956686 | 10.11  | 2.85  | 3.93E-04 | 9.46   | 4.47  | 3.45E-02 | 13.31   | 6.42   | 3.83E-02 | 10.58  | 7.13  | 1.38E-01 | 8.25    | 5.87  | 1.60E-01 |
| cg16612352 | 30.76  | 8.69  | 4.00E-04 | 33.20  | 14.30 | 2.03E-02 | 18.30   | 34.73  | 5.98E-01 | 31.48  | 13.44 | 1.92E-02 | 27.95   | 22.40 | 2.12E-01 |
| cg04986968 | 21.65  | 6.12  | 4.05E-04 | 13.97  | 13.31 | 2.94E-01 | 49.35   | 25.37  | 5.17E-02 | 24.50  | 7.58  | 1.23E-03 | -2.15   | 22.00 | 9.22E-01 |
| cg08692903 | 18.71  | 5.29  | 4.08E-04 | 16.94  | 8.32  | 4.17E-02 | 17.87   | 10.44  | 8.71E-02 | 18.32  | 11.85 | 1.22E-01 | 26.04   | 14.23 | 6.74E-02 |
| cg13932501 | 9.75   | 2.76  | 4.13E-04 | 9.63   | 4.05  | 1.76E-02 | 14.07   | 6.51   | 3.07E-02 | 10.23  | 5.86  | 8.08E-02 | 3.62    | 7.53  | 6.31E-01 |
| cg20332725 | 46.19  | 13.08 | 4.14E-04 | 37.32  | 17.18 | 2.99E-02 | 23.91   | 41.86  | 5.68E-01 | 63.18  | 44.14 | 1.52E-01 | 70.95   | 26.98 | 8.55E-03 |
| cg14791922 | 28.29  | 8.02  | 4.17E-04 | 40.50  | 17.90 | 2.37E-02 | 36.47   | 19.07  | 5.59E-02 | 26.73  | 11.22 | 1.72E-02 | 0.71    | 23.94 | 9.76E-01 |
| cg24711070 | -15.42 | 4.37  | 4.18E-04 | -9.93  | 11.37 | 3.82E-01 | -13.66  | 21.09  | 5.17E-01 | -14.78 | 5.12  | 3.87E-03 | -32.20  | 15.41 | 3.67E-02 |
| cg07374490 | 34.46  | 9.77  | 4.21E-04 | 21.53  | 20.19 | 2.86E-01 | 95.82   | 47.42  | 4.33E-02 | 32.01  | 12.32 | 9.36E-03 | 55.29   | 31.84 | 8.25E-02 |
| cg17126901 | 28.21  | 8.00  | 4.24E-04 | 8.08   | 22.74 | 7.22E-01 | 70.59   | 83.51  | 3.98E-01 | 32.32  | 9.01  | 3.33E-04 | 13.45   | 28.84 | 6.41E-01 |
| cg03428375 | 25.95  | 7.36  | 4.24E-04 | 26.18  | 16.54 | 1.13E-01 | 35.88   | 20.03  | 7.33E-02 | 24.19  | 9.53  | 1.12E-02 | 21.15   | 27.78 | 4.47E-01 |
| cg12352399 | 12.12  | 3.44  | 4.26E-04 | 6.99   | 6.12  | 2.53E-01 | 12.81   | 6.78   | 5.89E-02 | 13.40  | 6.30  | 3.33E-02 | 20.51   | 9.65  | 3.35E-02 |
| cg06446408 | 23.90  | 6.79  | 4.30E-04 | 35.82  | 15.31 | 1.93E-02 | 28.92   | 26.60  | 2.77E-01 | 18.47  | 8.36  | 2.72E-02 | 35.27   | 24.06 | 1.43E-01 |
| cg04922029 | 16.57  | 4.71  | 4.32E-04 | 18.50  | 6.08  | 2.37E-03 | 27.31   | 11.94  | 2.21E-02 | 15.71  | 11.83 | 1.84E-01 | -1.84   | 12.48 | 8.83E-01 |
| cg02060566 | 34.75  | 9.89  | 4.39E-04 | 40.11  | 13.36 | 2.69E-03 | 21.11   | 33.13  | 5.24E-01 | 30.94  | 36.05 | 3.91E-01 | 29.80   | 18.41 | 1.05E-01 |
| cg25645687 | 36.56  | 10.40 | 4.39E-04 | 45.05  | 27.38 | 1.00E-01 | 12.89   | 46.64  | 7.82E-01 | 37.96  | 12.17 | 1.81E-03 | 22.43   | 37.86 | 5.54E-01 |
| cg00391741 | 13.35  | 3.80  | 4.41E-04 | 13.10  | 5.31  | 1.37E-02 | 23.58   | 9.08   | 9.41E-03 | 3.12   | 9.23  | 7.35E-01 | 13.87   | 10.01 | 1.66E-01 |
| cg19879075 | 34.17  | 9.73  | 4.43E-04 | 12.46  | 20.32 | 5.40E-01 | 45.41   | 81.63  | 5.78E-01 | 44.71  | 12.00 | 1.95E-04 | 13.02   | 30.82 | 6.73E-01 |
| cg11829616 | 21.63  | 6.16  | 4.48E-04 | 30.32  | 16.36 | 6.39E-02 | 27.37   | 22.44  | 2.22E-01 | 20.54  | 7.24  | 4.57E-03 | 6.66    | 25.53 | 7.94E-01 |
| cg13752828 | 41.62  | 11.86 | 4.49E-04 | 25.57  | 19.08 | 1.80E-01 | 18.14   | 36.64  | 6.20E-01 | 47.38  | 21.02 | 2.42E-02 | 77.54   | 27.20 | 4.36E-03 |
| cg05315334 | 13.19  | 3.76  | 4.50E-04 | 12.62  | 5.13  | 1.38E-02 | 8.16    | 9.96   | 4.13E-01 | 23.17  | 9.14  | 1.13E-02 | 8.80    | 9.69  | 3.64E-01 |
| cg16181903 | -29.97 | 8.55  | 4.59E-04 | -43.32 | 13.27 | 1.09E-03 | -1.20   | 20.91  | 9.54E-01 | -24.15 | 16.69 | 1.48E-01 | -34.91  | 19.61 | 7.51E-02 |
| cg13357518 | 24.34  | 6.96  | 4.66E-04 | 36.07  | 18.00 | 4.51E-02 | 15.16   | 30.29  | 6.17E-01 | 27.63  | 8.97  | 2.07E-03 | 7.85    | 15.68 | 6.17E-01 |
| cg10480741 | -66.03 | 18.88 | 4.71E-04 | -56.83 | 24.97 | 2.29E-02 | -64.51  | 56.30  | 2.52E-01 | -54.91 | 50.99 | 2.82E-01 | -104.95 | 44.67 | 1.88E-02 |
| cg18434848 | 42.31  | 12.10 | 4.71E-04 | 16.52  | 29.14 | 5.71E-01 | -10.06  | 83.77  | 9.04E-01 | 49.58  | 14.60 | 6.83E-04 | 46.80   | 34.95 | 1.81E-01 |
| cg18689332 | 19.73  | 5.65  | 4.80E-04 | 18.90  | 9.74  | 5.23E-02 | 31.42   | 13.59  | 2.08E-02 | 19.09  | 13.48 | 1.57E-01 | 14.56   | 10.07 | 1.48E-01 |
| cg26560222 | 25.78  | 7.38  | 4.81E-04 | 31.69  | 16.05 | 4.84E-02 | 31.77   | 25.16  | 2.07E-01 | 21.59  | 10.14 | 3.33E-02 | 28.43   | 17.81 | 1.10E-01 |
| cg11305134 | -18.77 | 5.38  | 4.82E-04 | -17.85 | 16.45 | 2.78E-01 | -16.62  | 22.81  | 4.66E-01 | -18.37 | 6.12  | 2.69E-03 | -26.95  | 21.08 | 2.01E-01 |
| cg00773696 | 42.91  | 12.30 | 4.84E-04 | 92.17  | 37.05 | 1.29E-02 | -20.87  | 155.29 | 8.93E-01 | 35.11  | 13.51 | 9.35E-03 | 69.12   | 52.48 | 1.88E-01 |
| cg24669728 | 46.76  | 13.40 | 4.84E-04 | 10.08  | 29.63 | 7.34E-01 | 57.52   | 133.53 | 6.67E-01 | 53.11  | 16.05 | 9.39E-04 | 80.42   | 45.09 | 7.45E-02 |
| cg02277487 | 53.02  | 15.20 | 4.88E-04 | 49.18  | 43.76 | 2.61E-01 | -141.16 | 160.31 | 3.79E-01 | 56.82  | 17.25 | 9.85E-04 | 44.98   | 49.81 | 3.67E-01 |
| cg16933440 | 58.22  | 16.70 | 4.90E-04 | 64.55  | 23.91 | 6.93E-03 | 48.98   | 82.95  | 5.55E-01 | 79.25  | 52.24 | 1.29E-01 | 45.05   | 27.48 | 1.01E-01 |
| cg09520904 | 9.67   | 2.77  | 4.91E-04 | 5.50   | 3.86  | 1.54E-01 | 18.72   | 7.56   | 1.33E-02 | 11.82  | 6.88  | 8.55E-02 | 12.86   | 6.45  | 4.62E-02 |
| cg19022839 | -18.50 | 5.31  | 4.92E-04 | -28.53 | 11.14 | 1.04E-02 | -46.79  | 27.97  | 9.44E-02 | -11.52 | 6.96  | 9.79E-02 | -23.37  | 13.46 | 8.24E-02 |
| cg09449104 | -21.51 | 6.17  | 4.93E-04 | -21.35 | 17.11 | 2.12E-01 | 12.29   | 30.52  | 6.87E-01 | -22.47 | 7.12  | 1.60E-03 | -30.23  | 22.13 | 1.72E-01 |

|            |        |       |          |        |       |          |        |        |          |        |       |          |        |       |          |
|------------|--------|-------|----------|--------|-------|----------|--------|--------|----------|--------|-------|----------|--------|-------|----------|
| cg23252587 | -23.26 | 6.68  | 4.94E-04 | -27.58 | 18.05 | 1.27E-01 | 12.24  | 29.39  | 6.77E-01 | -24.71 | 7.68  | 1.30E-03 | -25.78 | 28.08 | 3.58E-01 |
| cg27598761 | 16.52  | 4.74  | 4.96E-04 | 12.58  | 7.61  | 9.84E-02 | 21.65  | 9.04   | 1.66E-02 | 26.65  | 12.65 | 3.51E-02 | 9.83   | 10.73 | 3.60E-01 |
| cg03094675 | 23.68  | 6.80  | 4.97E-04 | 31.42  | 12.01 | 8.88E-03 | 32.17  | 30.66  | 2.94E-01 | 23.00  | 9.98  | 2.12E-02 | 8.09   | 16.72 | 6.29E-01 |
| cg06962867 | -15.74 | 4.52  | 4.99E-04 | -22.35 | 13.60 | 1.00E-01 | 7.69   | 21.51  | 7.21E-01 | -14.80 | 5.12  | 3.82E-03 | -31.65 | 17.73 | 7.43E-02 |
| cg00269615 | 29.19  | 8.39  | 5.00E-04 | 36.88  | 17.51 | 3.52E-02 | 39.16  | 38.11  | 3.04E-01 | 21.39  | 10.89 | 4.95E-02 | 47.55  | 23.32 | 4.15E-02 |
| cg05135252 | -21.43 | 6.16  | 5.02E-04 | -19.81 | 13.04 | 1.29E-01 | -13.81 | 21.68  | 5.24E-01 | -23.76 | 7.75  | 2.18E-03 | -13.86 | 24.22 | 5.67E-01 |
| cg13514042 | 25.96  | 7.46  | 5.05E-04 | 17.13  | 11.37 | 1.32E-01 | 25.27  | 14.56  | 8.26E-02 | 23.89  | 19.14 | 2.12E-01 | 53.80  | 18.99 | 4.61E-03 |
| cg14653390 | -25.83 | 7.43  | 5.06E-04 | -32.71 | 13.03 | 1.21E-02 | -35.22 | 16.81  | 3.61E-02 | -14.53 | 14.93 | 3.30E-01 | -20.36 | 15.42 | 1.87E-01 |
| cg22721796 | -14.64 | 4.21  | 5.06E-04 | -15.27 | 6.12  | 1.26E-02 | -9.37  | 9.78   | 3.38E-01 | -7.63  | 14.46 | 5.98E-01 | -19.62 | 8.31  | 1.82E-02 |
| cg10677324 | -26.58 | 7.65  | 5.10E-04 | -35.02 | 21.28 | 9.98E-02 | -7.43  | 37.81  | 8.44E-01 | -29.22 | 8.72  | 8.00E-04 | 12.31  | 31.15 | 6.93E-01 |
| cg20238308 | -9.91  | 2.85  | 5.11E-04 | -12.93 | 5.83  | 2.65E-02 | -2.96  | 9.63   | 7.58E-01 | -10.13 | 3.91  | 9.65E-03 | -8.29  | 7.57  | 2.74E-01 |
| cg24011511 | -11.92 | 3.43  | 5.12E-04 | -7.78  | 7.38  | 2.91E-01 | -1.34  | 16.30  | 9.35E-01 | -14.52 | 4.40  | 9.61E-04 | -10.23 | 9.45  | 2.79E-01 |
| cg21781009 | 26.32  | 7.58  | 5.13E-04 | 28.60  | 12.55 | 2.27E-02 | 31.09  | 32.11  | 3.33E-01 | 13.59  | 11.91 | 2.54E-01 | 49.55  | 18.13 | 6.27E-03 |
| cg06639733 | 21.51  | 6.19  | 5.17E-04 | 19.33  | 9.63  | 4.46E-02 | 29.02  | 11.65  | 1.27E-02 | 14.07  | 15.36 | 3.60E-01 | 21.40  | 16.52 | 1.95E-01 |
| cg14875327 | -27.33 | 7.87  | 5.18E-04 | -38.62 | 11.69 | 9.49E-04 | -14.38 | 20.45  | 4.82E-01 | -31.24 | 18.02 | 8.30E-02 | -8.23  | 17.30 | 6.34E-01 |
| cg07000713 | -10.83 | 3.12  | 5.23E-04 | -14.61 | 6.13  | 1.72E-02 | -1.77  | 10.35  | 8.64E-01 | -9.43  | 4.40  | 3.22E-02 | -14.59 | 8.17  | 7.40E-02 |
| cg15924971 | -23.60 | 6.81  | 5.26E-04 | -40.31 | 15.30 | 8.40E-03 | -15.96 | 24.78  | 5.19E-01 | -21.18 | 8.63  | 1.40E-02 | -11.77 | 21.16 | 5.78E-01 |
| cg02633409 | 24.74  | 7.14  | 5.29E-04 | 27.67  | 15.33 | 7.11E-02 | 31.74  | 9.71   | 1.08E-03 | 8.99   | 21.43 | 6.75E-01 | 4.50   | 19.65 | 8.19E-01 |
| cg18786782 | 15.26  | 4.40  | 5.29E-04 | 11.25  | 10.91 | 3.03E-01 | 9.79   | 13.28  | 4.61E-01 | 15.84  | 5.55  | 4.32E-03 | 24.35  | 14.08 | 8.37E-02 |
| cg08109850 | 41.48  | 11.97 | 5.30E-04 | 0.54   | 45.07 | 9.91E-01 | -25.60 | 210.63 | 9.03E-01 | 45.50  | 12.75 | 3.60E-04 | 31.74  | 56.43 | 5.74E-01 |
| cg09067459 | 19.50  | 5.63  | 5.30E-04 | 14.95  | 7.39  | 4.31E-02 | 40.50  | 14.62  | 5.62E-03 | 27.58  | 18.81 | 1.43E-01 | 12.97  | 13.20 | 3.26E-01 |
| cg16373769 | 47.08  | 13.59 | 5.32E-04 | 42.24  | 25.23 | 9.41E-02 | -82.92 | 97.80  | 3.97E-01 | 50.21  | 17.87 | 4.95E-03 | 65.77  | 40.56 | 1.05E-01 |
| cg08613350 | -50.52 | 14.59 | 5.34E-04 | -43.14 | 19.17 | 2.44E-02 | -97.24 | 35.37  | 5.98E-03 | -10.30 | 35.01 | 7.69E-01 | -61.66 | 29.29 | 3.53E-02 |
| cg03428945 | -10.11 | 2.92  | 5.34E-04 | -9.36  | 5.09  | 6.59E-02 | -8.71  | 6.58   | 1.85E-01 | -11.33 | 5.30  | 3.26E-02 | -10.97 | 7.05  | 1.20E-01 |
| cg12302110 | -11.42 | 3.30  | 5.36E-04 | -13.61 | 6.00  | 2.32E-02 | -6.58  | 7.41   | 3.74E-01 | -13.45 | 5.37  | 1.23E-02 | -7.59  | 9.45  | 4.22E-01 |
| cg06232807 | 18.48  | 5.34  | 5.38E-04 | 26.14  | 8.03  | 1.13E-03 | 12.62  | 13.09  | 3.35E-01 | 19.03  | 14.69 | 1.95E-01 | 8.88   | 10.50 | 3.98E-01 |
| cg21649713 | -19.32 | 5.58  | 5.42E-04 | -11.19 | 8.70  | 1.98E-01 | -23.62 | 11.50  | 4.00E-02 | -38.47 | 17.04 | 2.39E-02 | -20.43 | 11.28 | 7.01E-02 |
| cg23746347 | 21.29  | 6.16  | 5.45E-04 | 17.68  | 15.45 | 2.53E-01 | 33.35  | 37.40  | 3.72E-01 | 24.81  | 7.68  | 1.25E-03 | 9.61   | 14.83 | 5.17E-01 |
| cg26639747 | -23.47 | 6.79  | 5.50E-04 | -31.95 | 11.00 | 3.68E-03 | 1.05   | 17.37  | 9.52E-01 | -25.90 | 14.82 | 8.05E-02 | -23.51 | 13.44 | 8.03E-02 |
| cg06688910 | 19.49  | 5.64  | 5.55E-04 | 24.65  | 7.79  | 1.55E-03 | 5.04   | 13.61  | 7.11E-01 | 33.96  | 20.28 | 9.39E-02 | 13.49  | 11.91 | 2.57E-01 |
| cg18736711 | -24.55 | 7.11  | 5.55E-04 | -20.69 | 17.26 | 2.31E-01 | -5.25  | 20.06  | 7.93E-01 | -25.00 | 9.07  | 5.84E-03 | -55.85 | 23.74 | 1.86E-02 |
| cg09390241 | -9.29  | 2.69  | 5.61E-04 | -11.27 | 3.72  | 2.49E-03 | -4.97  | 6.02   | 4.09E-01 | -20.61 | 9.96  | 3.85E-02 | -4.40  | 5.98  | 4.61E-01 |
| cg02858288 | 27.64  | 8.01  | 5.63E-04 | 32.17  | 16.59 | 5.24E-02 | 0.17   | 18.62  | 9.93E-01 | 37.14  | 11.80 | 1.65E-03 | 24.72  | 23.11 | 2.85E-01 |
| cg19345662 | -10.40 | 3.02  | 5.70E-04 | -7.71  | 4.27  | 7.13E-02 | -14.72 | 7.00   | 3.54E-02 | -4.42  | 9.50  | 6.42E-01 | -15.69 | 6.51  | 1.59E-02 |
| cg04103645 | -22.16 | 6.43  | 5.74E-04 | -27.54 | 10.21 | 6.97E-03 | -8.75  | 16.43  | 5.94E-01 | -22.01 | 12.19 | 7.10E-02 | -21.91 | 15.57 | 1.59E-01 |

|            |        |       |          |        |       |          |         |        |          |        |       |          |        |       |          |
|------------|--------|-------|----------|--------|-------|----------|---------|--------|----------|--------|-------|----------|--------|-------|----------|
| cg03398461 | 21.05  | 6.11  | 5.74E-04 | 25.59  | 10.73 | 1.71E-02 | 32.40   | 16.50  | 4.96E-02 | 16.32  | 9.24  | 7.72E-02 | 11.46  | 19.34 | 5.54E-01 |
| cg08969304 | 17.83  | 5.19  | 5.84E-04 | 17.84  | 9.06  | 4.90E-02 | 9.84    | 20.89  | 6.38E-01 | 19.58  | 8.29  | 1.81E-02 | 16.94  | 11.07 | 1.26E-01 |
| cg22795586 | 23.11  | 6.72  | 5.88E-04 | 20.54  | 14.53 | 1.57E-01 | 32.77   | 26.06  | 2.09E-01 | 25.92  | 9.76  | 7.91E-03 | 17.28  | 13.59 | 2.04E-01 |
| cg07593845 | -29.28 | 8.53  | 5.94E-04 | -27.16 | 16.78 | 1.06E-01 | 23.09   | 32.22  | 4.74E-01 | -36.06 | 11.08 | 1.14E-03 | -32.39 | 25.50 | 2.04E-01 |
| cg10698097 | -31.00 | 9.03  | 5.97E-04 | -30.51 | 13.76 | 2.67E-02 | -36.65  | 31.34  | 2.42E-01 | -60.87 | 22.47 | 6.75E-03 | -15.37 | 15.84 | 3.32E-01 |
| cg07842862 | 21.07  | 6.14  | 5.98E-04 | 18.15  | 8.87  | 4.07E-02 | 16.03   | 17.65  | 3.64E-01 | 59.83  | 27.13 | 2.74E-02 | 21.13  | 10.39 | 4.20E-02 |
| cg08172575 | -23.53 | 6.86  | 6.06E-04 | -30.44 | 18.77 | 1.05E-01 | -31.27  | 27.38  | 2.53E-01 | -22.29 | 8.02  | 5.46E-03 | -16.51 | 25.56 | 5.18E-01 |
| cg07895499 | -21.96 | 6.41  | 6.11E-04 | -37.29 | 15.62 | 1.70E-02 | -17.12  | 27.23  | 5.29E-01 | -17.30 | 7.80  | 2.66E-02 | -30.12 | 20.09 | 1.34E-01 |
| cg02367144 | 19.87  | 5.80  | 6.12E-04 | 16.34  | 8.68  | 5.97E-02 | 33.51   | 16.69  | 4.46E-02 | 25.26  | 18.18 | 1.65E-01 | 17.99  | 10.08 | 7.43E-02 |
| cg04601957 | 31.50  | 9.20  | 6.14E-04 | 28.81  | 11.30 | 1.08E-02 | 16.53   | 40.77  | 6.85E-01 | 58.16  | 52.18 | 2.65E-01 | 38.21  | 18.17 | 3.55E-02 |
| cg07794169 | -18.86 | 5.51  | 6.16E-04 | -21.61 | 10.16 | 3.35E-02 | -0.71   | 18.37  | 9.69E-01 | -19.10 | 8.23  | 2.04E-02 | -23.08 | 13.38 | 8.46E-02 |
| cg04358516 | 20.03  | 5.85  | 6.17E-04 | 19.69  | 15.80 | 2.13E-01 | 41.33   | 19.72  | 3.61E-02 | 18.93  | 7.07  | 7.37E-03 | 7.99   | 19.52 | 6.82E-01 |
| cg24248713 | 26.26  | 7.67  | 6.18E-04 | 34.51  | 11.06 | 1.80E-03 | 7.22    | 33.18  | 8.28E-01 | 36.59  | 24.79 | 1.40E-01 | 15.60  | 12.61 | 2.16E-01 |
| cg00910695 | 25.94  | 7.58  | 6.18E-04 | 37.41  | 24.48 | 1.26E-01 | 33.28   | 35.09  | 3.43E-01 | 24.39  | 9.39  | 9.36E-03 | 23.85  | 16.71 | 1.53E-01 |
| cg01213231 | 18.28  | 5.34  | 6.19E-04 | 14.53  | 7.04  | 3.88E-02 | 27.56   | 12.73  | 3.04E-02 | 27.92  | 17.81 | 1.17E-01 | 16.12  | 13.43 | 2.30E-01 |
| cg20112110 | 23.55  | 6.88  | 6.19E-04 | 17.17  | 15.04 | 2.54E-01 | 20.53   | 27.16  | 4.50E-01 | 23.90  | 8.77  | 6.41E-03 | 35.44  | 20.68 | 8.66E-02 |
| cg12041056 | 47.33  | 13.83 | 6.21E-04 | 44.95  | 33.22 | 1.76E-01 | 84.88   | 96.27  | 3.78E-01 | 48.49  | 16.66 | 3.61E-03 | 37.41  | 40.47 | 3.55E-01 |
| cg25307332 | 44.95  | 13.15 | 6.27E-04 | 63.97  | 17.97 | 3.70E-04 | 15.91   | 41.32  | 7.00E-01 | 62.01  | 30.57 | 4.25E-02 | 18.61  | 21.76 | 3.92E-01 |
| cg09890980 | -10.48 | 3.07  | 6.39E-04 | -4.79  | 5.78  | 4.07E-01 | -14.91  | 11.18  | 1.82E-01 | -14.61 | 4.52  | 1.24E-03 | -7.02  | 7.19  | 3.29E-01 |
| cg00308159 | 34.19  | 10.02 | 6.43E-04 | 47.22  | 13.87 | 6.60E-04 | 9.70    | 25.68  | 7.06E-01 | 31.54  | 39.61 | 4.26E-01 | 23.09  | 19.57 | 2.38E-01 |
| cg02110782 | 47.11  | 13.81 | 6.44E-04 | 26.17  | 44.26 | 5.54E-01 | -193.88 | 177.60 | 2.75E-01 | 50.40  | 15.07 | 8.27E-04 | 59.83  | 57.44 | 2.98E-01 |
| cg14583869 | 43.65  | 12.80 | 6.52E-04 | 50.30  | 50.21 | 3.16E-01 | 95.93   | 170.94 | 5.75E-01 | 45.39  | 13.65 | 8.86E-04 | -1.53  | 57.27 | 9.79E-01 |
| cg18259253 | -17.55 | 5.15  | 6.55E-04 | -24.92 | 12.05 | 3.87E-02 | -22.54  | 17.44  | 1.96E-01 | -15.97 | 6.71  | 1.73E-02 | -11.55 | 13.73 | 4.00E-01 |
| cg16953067 | -73.78 | 21.67 | 6.62E-04 | -49.91 | 45.40 | 2.72E-01 | 61.70   | 271.45 | 8.20E-01 | -90.03 | 28.44 | 1.55E-03 | -56.86 | 50.37 | 2.59E-01 |
| cg07563882 | 33.12  | 9.73  | 6.65E-04 | 38.79  | 19.23 | 4.37E-02 | 41.41   | 21.41  | 5.31E-02 | 17.64  | 14.78 | 2.33E-01 | 67.25  | 30.18 | 2.59E-02 |
| cg01869273 | 53.66  | 15.79 | 6.77E-04 | 66.53  | 21.13 | 1.64E-03 | 24.29   | 61.07  | 6.91E-01 | 9.29   | 53.35 | 8.62E-01 | 49.00  | 29.44 | 9.61E-02 |
| cg20485058 | -17.17 | 5.05  | 6.79E-04 | -10.18 | 14.71 | 4.89E-01 | 3.47    | 17.77  | 8.45E-01 | -22.12 | 5.91  | 1.83E-04 | -1.25  | 19.05 | 9.48E-01 |
| cg13618906 | 35.06  | 10.32 | 6.82E-04 | 2.38   | 23.91 | 9.21E-01 | 8.72    | 81.31  | 9.15E-01 | 45.78  | 10.19 | 7.08E-06 | 20.99  | 30.72 | 4.94E-01 |
| cg18772573 | 19.00  | 5.60  | 6.92E-04 | 16.67  | 8.44  | 4.81E-02 | 22.53   | 10.65  | 3.43E-02 | 13.49  | 15.21 | 3.75E-01 | 24.42  | 14.60 | 9.45E-02 |
| cg02341038 | 65.07  | 19.18 | 6.92E-04 | 110.28 | 53.46 | 3.91E-02 | 2.91    | 267.90 | 9.91E-01 | 63.77  | 21.93 | 3.64E-03 | 20.64  | 60.21 | 7.32E-01 |
| cg11072779 | 26.87  | 7.92  | 6.92E-04 | 8.50   | 21.51 | 6.93E-01 | -5.69   | 40.39  | 8.88E-01 | 29.71  | 9.06  | 1.04E-03 | 52.44  | 31.94 | 1.01E-01 |
| cg09495977 | 26.81  | 7.91  | 7.00E-04 | 24.91  | 17.41 | 1.53E-01 | 13.44   | 24.84  | 5.88E-01 | 20.47  | 12.00 | 8.80E-02 | 44.27  | 15.58 | 4.49E-03 |
| cg09209257 | -14.15 | 4.18  | 7.04E-04 | -16.59 | 6.08  | 6.36E-03 | -3.73   | 10.03  | 7.10E-01 | -19.53 | 10.49 | 6.27E-02 | -13.16 | 9.44  | 1.63E-01 |
| cg14370507 | -25.02 | 7.39  | 7.11E-04 | -39.26 | 13.14 | 2.81E-03 | -57.24  | 36.99  | 1.22E-01 | -19.51 | 8.84  | 2.74E-02 | -3.78  | 22.51 | 8.67E-01 |
| cg02835467 | 26.40  | 7.80  | 7.12E-04 | 30.50  | 10.79 | 4.71E-03 | 44.66   | 38.11  | 2.41E-01 | 48.20  | 28.40 | 8.96E-02 | 13.77  | 13.00 | 2.89E-01 |

|            |        |       |          |        |       |          |         |        |          |        |       |          |         |       |          |
|------------|--------|-------|----------|--------|-------|----------|---------|--------|----------|--------|-------|----------|---------|-------|----------|
| cg01906801 | 23.50  | 6.94  | 7.13E-04 | 27.96  | 10.33 | 6.80E-03 | 17.05   | 13.27  | 1.99E-01 | 42.00  | 20.34 | 3.90E-02 | 8.30    | 17.48 | 6.35E-01 |
| cg26751588 | -12.97 | 3.83  | 7.13E-04 | -19.43 | 5.86  | 9.07E-04 | -9.97   | 8.84   | 2.59E-01 | -8.09  | 10.97 | 4.61E-01 | -6.84   | 7.48  | 3.61E-01 |
| cg04456754 | -15.33 | 4.53  | 7.15E-04 | -25.79 | 9.28  | 5.44E-03 | -4.26   | 11.60  | 7.13E-01 | -14.40 | 6.97  | 3.89E-02 | -13.11  | 10.47 | 2.11E-01 |
| cg07162905 | 25.20  | 7.45  | 7.15E-04 | 18.59  | 19.18 | 3.33E-01 | 31.43   | 21.77  | 1.49E-01 | 26.15  | 9.31  | 4.94E-03 | 21.45   | 24.58 | 3.83E-01 |
| cg14615833 | 14.78  | 4.37  | 7.16E-04 | 21.13  | 10.85 | 5.15E-02 | 14.09   | 14.27  | 3.24E-01 | 15.44  | 5.43  | 4.46E-03 | 0.34    | 14.10 | 9.80E-01 |
| cg02026535 | 29.74  | 8.79  | 7.20E-04 | 30.22  | 21.80 | 1.66E-01 | 51.92   | 34.36  | 1.31E-01 | 28.33  | 10.50 | 6.98E-03 | 22.06   | 33.14 | 5.05E-01 |
| cg02110858 | 10.32  | 3.05  | 7.21E-04 | 10.31  | 4.55  | 2.36E-02 | 14.98   | 5.71   | 8.68E-03 | 5.82   | 10.93 | 5.94E-01 | 5.09    | 7.06  | 4.71E-01 |
| cg01808968 | -21.78 | 6.45  | 7.28E-04 | -24.06 | 13.53 | 7.54E-02 | -23.61  | 16.69  | 1.57E-01 | -17.54 | 9.76  | 7.22E-02 | -27.41  | 14.88 | 6.55E-02 |
| cg14835423 | 48.40  | 14.33 | 7.30E-04 | -7.17  | 42.75 | 8.67E-01 | -39.72  | 158.63 | 8.02E-01 | 55.98  | 15.86 | 4.16E-04 | 60.72   | 56.99 | 2.87E-01 |
| cg26385062 | 19.22  | 5.69  | 7.31E-04 | 15.14  | 7.83  | 5.31E-02 | 31.04   | 12.33  | 1.18E-02 | 31.19  | 18.36 | 8.93E-02 | 9.93    | 14.13 | 4.82E-01 |
| cg06747322 | -38.74 | 11.47 | 7.32E-04 | -78.01 | 39.29 | 4.71E-02 | -105.56 | 156.37 | 5.00E-01 | -32.84 | 12.58 | 9.07E-03 | -54.09  | 41.00 | 1.87E-01 |
| cg05269040 | -15.96 | 4.73  | 7.35E-04 | -14.92 | 6.63  | 2.44E-02 | -29.15  | 12.30  | 1.78E-02 | -7.85  | 13.17 | 5.51E-01 | -14.22  | 10.21 | 1.64E-01 |
| cg06632214 | 13.56  | 4.02  | 7.37E-04 | 9.00   | 9.95  | 3.66E-01 | 16.25   | 18.16  | 3.71E-01 | 15.62  | 4.72  | 9.25E-04 | -0.67   | 16.16 | 9.67E-01 |
| cg24846343 | 16.85  | 5.00  | 7.45E-04 | 22.38  | 8.82  | 1.12E-02 | 17.76   | 10.66  | 9.59E-02 | 20.45  | 9.82  | 3.73E-02 | 2.39    | 11.14 | 8.30E-01 |
| cg10559742 | 12.51  | 3.71  | 7.46E-04 | 14.72  | 5.88  | 1.23E-02 | 12.07   | 8.98   | 1.79E-01 | 8.89   | 7.28  | 2.22E-01 | 13.32   | 8.97  | 1.37E-01 |
| cg24172553 | 25.35  | 7.52  | 7.46E-04 | 10.78  | 23.86 | 6.52E-01 | -30.55  | 48.37  | 5.28E-01 | 27.96  | 8.32  | 7.73E-04 | 36.44   | 30.78 | 2.37E-01 |
| cg11434976 | 46.56  | 13.81 | 7.49E-04 | 44.08  | 16.43 | 7.30E-03 | 96.22   | 93.45  | 3.03E-01 | 87.72  | 62.89 | 1.63E-01 | 40.67   | 29.24 | 1.64E-01 |
| cg04638766 | -12.24 | 3.63  | 7.50E-04 | -14.93 | 5.07  | 3.21E-03 | -8.78   | 8.22   | 2.86E-01 | -12.04 | 11.81 | 3.08E-01 | -8.75   | 8.20  | 2.86E-01 |
| cg10319399 | 26.88  | 7.98  | 7.51E-04 | 22.78  | 24.41 | 3.51E-01 | 35.06   | 85.20  | 6.81E-01 | 26.47  | 8.83  | 2.71E-03 | 37.22   | 30.60 | 2.24E-01 |
| cg17833902 | -25.78 | 7.65  | 7.52E-04 | -39.61 | 18.28 | 3.03E-02 | 19.48   | 52.28  | 7.09E-01 | -23.79 | 8.95  | 7.84E-03 | -25.86  | 28.48 | 3.64E-01 |
| cg24037166 | 35.65  | 10.58 | 7.53E-04 | 43.20  | 23.91 | 7.08E-02 | 46.40   | 68.83  | 5.00E-01 | 31.73  | 12.63 | 1.20E-02 | 48.68   | 37.75 | 1.97E-01 |
| cg01400040 | -11.51 | 3.42  | 7.58E-04 | -12.61 | 7.57  | 9.61E-02 | -10.61  | 17.26  | 5.39E-01 | -10.00 | 4.28  | 1.93E-02 | -18.08  | 9.95  | 6.91E-02 |
| cg02462818 | 16.19  | 4.81  | 7.66E-04 | 16.26  | 6.64  | 1.44E-02 | 19.56   | 9.56   | 4.07E-02 | 17.07  | 28.31 | 5.47E-01 | 11.46   | 10.96 | 2.96E-01 |
| cg02109605 | 27.91  | 8.29  | 7.66E-04 | 39.94  | 19.23 | 3.78E-02 | 33.36   | 19.65  | 8.96E-02 | 22.15  | 11.13 | 4.67E-02 | 27.78   | 29.18 | 3.41E-01 |
| cg02589576 | -13.77 | 4.10  | 7.72E-04 | -17.86 | 5.75  | 1.90E-03 | -6.30   | 9.24   | 4.95E-01 | -4.98  | 14.89 | 7.38E-01 | -14.03  | 8.72  | 1.07E-01 |
| cg20759823 | -25.43 | 7.56  | 7.73E-04 | -15.65 | 16.58 | 3.45E-01 | -40.06  | 33.91  | 2.37E-01 | -28.83 | 9.54  | 2.52E-03 | -18.19  | 22.42 | 4.17E-01 |
| cg14687660 | -18.23 | 5.42  | 7.74E-04 | -12.48 | 7.63  | 1.02E-01 | -32.39  | 12.91  | 1.21E-02 | 0.61   | 19.95 | 9.75E-01 | -24.71  | 10.42 | 1.77E-02 |
| cg03853987 | 23.17  | 6.90  | 7.83E-04 | 18.81  | 9.07  | 3.80E-02 | 38.53   | 18.84  | 4.08E-02 | 30.79  | 35.92 | 3.91E-01 | 23.91   | 13.80 | 8.32E-02 |
| cg13528199 | -74.40 | 22.16 | 7.87E-04 | -61.43 | 35.31 | 8.19E-02 | -39.53  | 199.57 | 8.43E-01 | -41.45 | 48.25 | 3.90E-01 | -107.01 | 35.81 | 2.81E-03 |
| cg08572513 | -10.06 | 3.00  | 7.88E-04 | -10.45 | 4.27  | 1.44E-02 | -0.75   | 6.74   | 9.12E-01 | -15.88 | 9.25  | 8.63E-02 | -15.11  | 6.61  | 2.23E-02 |
| cg23327992 | 60.28  | 17.96 | 7.90E-04 | 36.27  | 40.41 | 3.69E-01 | -42.79  | 197.77 | 8.29E-01 | 69.44  | 21.57 | 1.28E-03 | 52.72   | 56.55 | 3.51E-01 |
| cg22439651 | -11.13 | 3.32  | 7.90E-04 | -14.03 | 7.29  | 5.43E-02 | -12.68  | 12.47  | 3.09E-01 | -7.89  | 4.36  | 7.05E-02 | -19.13  | 8.71  | 2.81E-02 |
| cg05434952 | 58.69  | 17.49 | 7.91E-04 | 41.30  | 46.74 | 3.77E-01 | -108.34 | 191.79 | 5.72E-01 | 68.08  | 19.90 | 6.22E-04 | 15.23   | 62.27 | 8.07E-01 |
| cg10325659 | -40.56 | 12.09 | 7.93E-04 | -37.41 | 16.67 | 2.48E-02 | -39.96  | 51.69  | 4.39E-01 | -45.68 | 25.08 | 6.85E-02 | -43.23  | 27.95 | 1.22E-01 |
| cg23689052 | 30.72  | 9.16  | 7.96E-04 | 29.49  | 15.58 | 5.84E-02 | 17.62   | 34.76  | 6.12E-01 | 32.49  | 14.77 | 2.78E-02 | 33.98   | 20.44 | 9.65E-02 |

|            |        |       |          |        |       |          |         |        |          |        |       |          |        |       |          |
|------------|--------|-------|----------|--------|-------|----------|---------|--------|----------|--------|-------|----------|--------|-------|----------|
| cg10969919 | -17.12 | 5.11  | 8.01E-04 | -16.27 | 10.06 | 1.06E-01 | -4.59   | 15.63  | 7.69E-01 | -22.12 | 7.39  | 2.77E-03 | -11.90 | 12.86 | 3.55E-01 |
| cg09876101 | 91.87  | 27.42 | 8.06E-04 | 143.97 | 78.22 | 6.57E-02 | 322.09  | 336.79 | 3.39E-01 | 94.75  | 31.09 | 2.31E-03 | -17.45 | 89.89 | 8.46E-01 |
| cg25820728 | -15.30 | 4.57  | 8.06E-04 | -15.73 | 6.73  | 1.94E-02 | -4.88   | 14.79  | 7.41E-01 | -26.34 | 12.74 | 3.88E-02 | -13.33 | 8.13  | 1.01E-01 |
| cg08286785 | 29.69  | 8.87  | 8.12E-04 | 27.16  | 15.52 | 8.01E-02 | 27.19   | 16.79  | 1.05E-01 | 21.11  | 17.57 | 2.30E-01 | 56.10  | 23.66 | 1.77E-02 |
| cg07423050 | -12.07 | 3.60  | 8.12E-04 | -14.88 | 5.45  | 6.39E-03 | -18.86  | 8.95   | 3.50E-02 | -3.86  | 9.93  | 6.97E-01 | -7.44  | 6.94  | 2.84E-01 |
| cg00341935 | 25.80  | 7.71  | 8.17E-04 | 25.78  | 19.30 | 1.82E-01 | 41.29   | 32.30  | 2.01E-01 | 24.51  | 9.09  | 7.00E-03 | 26.59  | 30.46 | 3.83E-01 |
| cg22597040 | 27.74  | 8.30  | 8.24E-04 | 48.78  | 13.72 | 3.79E-04 | 20.90   | 19.85  | 2.92E-01 | 13.15  | 18.11 | 4.68E-01 | 20.33  | 12.68 | 1.09E-01 |
| cg06845943 | -70.82 | 21.18 | 8.26E-04 | -78.70 | 51.07 | 1.23E-01 | -410.50 | 197.76 | 3.79E-02 | -62.06 | 21.34 | 3.64E-03 | -83.25 | 66.42 | 2.10E-01 |
| cg21635265 | 26.39  | 7.90  | 8.30E-04 | 40.10  | 15.12 | 8.00E-03 | 22.99   | 15.42  | 1.36E-01 | 16.81  | 13.59 | 2.16E-01 | 29.43  | 22.11 | 1.83E-01 |
| cg04830825 | 23.45  | 7.02  | 8.35E-04 | 21.57  | 8.81  | 1.43E-02 | 13.04   | 21.48  | 5.44E-01 | 41.53  | 31.93 | 1.93E-01 | 30.26  | 15.32 | 4.81E-02 |
| cg05290058 | 8.22   | 2.46  | 8.35E-04 | 6.06   | 4.08  | 1.37E-01 | 12.18   | 5.39   | 2.39E-02 | 11.41  | 5.53  | 3.90E-02 | 5.29   | 5.14  | 3.03E-01 |
| cg04753786 | 35.65  | 10.67 | 8.35E-04 | 37.56  | 13.86 | 6.71E-03 | 21.92   | 34.24  | 5.22E-01 | 79.16  | 65.98 | 2.30E-01 | 32.34  | 20.04 | 1.07E-01 |
| cg22949256 | -13.02 | 3.90  | 8.39E-04 | -20.82 | 8.68  | 1.65E-02 | -1.16   | 12.80  | 9.28E-01 | -11.15 | 5.13  | 2.98E-02 | -17.77 | 10.90 | 1.03E-01 |
| cg14992768 | -14.61 | 4.37  | 8.40E-04 | -21.08 | 11.15 | 5.86E-02 | -13.30  | 18.20  | 4.65E-01 | -12.50 | 5.26  | 1.75E-02 | -20.10 | 14.03 | 1.52E-01 |
| cg02072896 | -55.01 | 16.48 | 8.43E-04 | -65.29 | 19.21 | 6.78E-04 | -2.22   | 40.46  | 9.56E-01 | -93.04 | 32.74 | 4.48E-03 | -31.88 | 32.70 | 3.30E-01 |
| cg18817459 | -11.71 | 3.51  | 8.43E-04 | -7.15  | 5.99  | 2.33E-01 | -8.99   | 9.19   | 3.28E-01 | -17.95 | 5.63  | 1.42E-03 | -7.90  | 10.01 | 4.30E-01 |
| cg13134448 | 36.01  | 10.79 | 8.47E-04 | 33.43  | 13.27 | 1.17E-02 | 9.00    | 41.95  | 8.30E-01 | -0.37  | 57.48 | 9.95E-01 | 56.13  | 22.16 | 1.13E-02 |
| cg03660085 | -11.57 | 3.47  | 8.49E-04 | -19.25 | 6.75  | 4.33E-03 | -5.59   | 10.11  | 5.81E-01 | -8.40  | 5.34  | 1.16E-01 | -11.63 | 7.83  | 1.37E-01 |
| cg26572992 | -19.73 | 5.92  | 8.54E-04 | -22.67 | 8.84  | 1.03E-02 | -12.33  | 14.63  | 3.99E-01 | -22.46 | 14.34 | 1.17E-01 | -17.09 | 12.68 | 1.78E-01 |
| cg02198144 | -16.38 | 4.91  | 8.58E-04 | -23.44 | 7.71  | 2.35E-03 | -5.13   | 14.54  | 7.24E-01 | -22.65 | 11.77 | 5.44E-02 | -7.60  | 8.90  | 3.94E-01 |
| cg14723032 | 21.21  | 6.36  | 8.58E-04 | 19.62  | 11.72 | 9.40E-02 | 16.13   | 13.96  | 2.48E-01 | 22.50  | 10.41 | 3.07E-02 | 29.68  | 18.11 | 1.01E-01 |
| cg06928741 | 11.77  | 3.53  | 8.59E-04 | 10.74  | 4.41  | 1.50E-02 | 13.86   | 8.64   | 1.09E-01 | 27.00  | 14.30 | 5.90E-02 | 7.06   | 9.74  | 4.68E-01 |
| cg07593852 | -14.00 | 4.20  | 8.64E-04 | -14.83 | 8.81  | 9.21E-02 | -0.25   | 14.72  | 9.87E-01 | -14.30 | 5.53  | 9.72E-03 | -20.63 | 12.46 | 9.76E-02 |
| cg17039391 | 29.45  | 8.84  | 8.66E-04 | 4.40   | 32.47 | 8.92E-01 | -63.61  | 147.27 | 6.66E-01 | 31.74  | 9.48  | 8.13E-04 | 33.30  | 38.69 | 3.89E-01 |
| cg16814786 | 9.42   | 2.83  | 8.69E-04 | 8.92   | 3.64  | 1.44E-02 | 16.65   | 6.51   | 1.05E-02 | 4.80   | 11.21 | 6.68E-01 | 4.08   | 7.48  | 5.85E-01 |
| cg09104284 | -34.06 | 10.23 | 8.72E-04 | -25.54 | 18.81 | 1.74E-01 | -67.19  | 37.95  | 7.67E-02 | -26.40 | 17.20 | 1.25E-01 | -44.26 | 19.43 | 2.28E-02 |
| cg22635088 | -14.91 | 4.48  | 8.73E-04 | -17.56 | 6.90  | 1.09E-02 | -4.09   | 10.95  | 7.09E-01 | -20.54 | 10.47 | 4.98E-02 | -13.43 | 9.37  | 1.52E-01 |
| cg03974423 | 73.87  | 22.19 | 8.74E-04 | 96.89  | 30.87 | 1.70E-03 | 47.40   | 72.05  | 5.11E-01 | 45.61  | 57.47 | 4.27E-01 | 52.26  | 45.39 | 2.50E-01 |
| cg06691616 | -14.33 | 4.31  | 8.75E-04 | -18.46 | 10.60 | 8.15E-02 | -40.59  | 17.07  | 1.74E-02 | -11.99 | 5.26  | 2.28E-02 | -7.48  | 12.50 | 5.50E-01 |
| cg26658743 | -8.47  | 2.54  | 8.76E-04 | -7.70  | 4.52  | 8.82E-02 | -7.56   | 5.85   | 1.97E-01 | -10.90 | 4.12  | 8.09E-03 | -3.85  | 7.62  | 6.13E-01 |
| cg09315878 | -10.07 | 3.03  | 8.80E-04 | -10.08 | 4.05  | 1.28E-02 | -7.71   | 6.78   | 2.56E-01 | -11.24 | 10.50 | 2.84E-01 | -12.37 | 7.59  | 1.03E-01 |
| cg00856157 | 26.57  | 7.99  | 8.83E-04 | 22.24  | 10.91 | 4.15E-02 | 6.88    | 30.13  | 8.19E-01 | 29.08  | 18.37 | 1.13E-01 | 42.38  | 17.68 | 1.65E-02 |
| cg07856521 | 26.39  | 7.94  | 8.88E-04 | 35.13  | 11.63 | 2.54E-03 | 28.76   | 21.34  | 1.78E-01 | 37.11  | 23.72 | 1.18E-01 | 6.67   | 14.91 | 6.55E-01 |
| cg07479864 | 37.37  | 11.25 | 8.95E-04 | 36.83  | 34.80 | 2.90E-01 | -16.80  | 148.17 | 9.10E-01 | 41.91  | 12.39 | 7.18E-04 | -14.47 | 44.09 | 7.43E-01 |
| cg04705952 | 22.52  | 6.78  | 8.96E-04 | 18.85  | 9.74  | 5.30E-02 | 26.79   | 14.23  | 5.98E-02 | 27.33  | 18.66 | 1.43E-01 | 23.64  | 17.13 | 1.68E-01 |

|            |        |       |          |        |       |          |         |        |          |        |       |          |        |       |          |
|------------|--------|-------|----------|--------|-------|----------|---------|--------|----------|--------|-------|----------|--------|-------|----------|
| cg24048759 | 46.14  | 13.89 | 8.96E-04 | 30.84  | 38.60 | 4.24E-01 | 28.96   | 197.02 | 8.83E-01 | 48.33  | 15.55 | 1.88E-03 | 50.90  | 53.63 | 3.43E-01 |
| cg04172115 | 29.05  | 8.75  | 8.97E-04 | 8.56   | 13.45 | 5.24E-01 | 36.31   | 15.83  | 2.18E-02 | 40.69  | 17.60 | 2.08E-02 | 43.14  | 19.38 | 2.60E-02 |
| cg18404374 | 14.44  | 4.35  | 8.98E-04 | 17.98  | 6.28  | 4.22E-03 | 6.05    | 10.59  | 5.68E-01 | 24.54  | 13.77 | 7.47E-02 | 9.34   | 8.64  | 2.79E-01 |
| cg23261171 | -12.74 | 3.84  | 9.02E-04 | -11.29 | 8.03  | 1.60E-01 | -28.31  | 12.15  | 1.98E-02 | -11.98 | 5.34  | 2.50E-02 | -7.43  | 9.74  | 4.45E-01 |
| cg14034270 | 20.00  | 6.03  | 9.08E-04 | 18.73  | 9.04  | 3.83E-02 | 18.73   | 13.11  | 1.53E-01 | 12.77  | 13.92 | 3.59E-01 | 34.05  | 15.26 | 2.57E-02 |
| cg07995570 | 44.85  | 13.52 | 9.10E-04 | 44.92  | 19.88 | 2.38E-02 | 14.77   | 53.60  | 7.83E-01 | 55.73  | 28.78 | 5.28E-02 | 42.80  | 26.89 | 1.11E-01 |
| cg08113895 | -12.10 | 3.65  | 9.11E-04 | -13.10 | 6.23  | 3.54E-02 | -8.98   | 7.57   | 2.35E-01 | -15.15 | 7.75  | 5.07E-02 | -10.63 | 8.08  | 1.88E-01 |
| cg21446692 | -35.64 | 10.75 | 9.11E-04 | -39.17 | 35.39 | 2.68E-01 | -72.70  | 118.98 | 5.41E-01 | -35.21 | 11.76 | 2.75E-03 | -31.53 | 42.32 | 4.56E-01 |
| cg04652932 | 34.49  | 10.41 | 9.20E-04 | 35.44  | 14.82 | 1.68E-02 | 33.10   | 22.13  | 1.35E-01 | 28.98  | 37.48 | 4.39E-01 | 35.75  | 22.80 | 1.17E-01 |
| cg12061886 | 14.16  | 4.28  | 9.25E-04 | 9.44   | 5.92  | 1.11E-01 | 23.59   | 9.22   | 1.05E-02 | 3.83   | 13.53 | 7.77E-01 | 23.15  | 10.57 | 2.85E-02 |
| cg26939365 | 19.77  | 5.97  | 9.27E-04 | 16.94  | 15.21 | 2.65E-01 | 33.29   | 25.87  | 1.98E-01 | 17.41  | 6.96  | 1.23E-02 | 45.27  | 25.03 | 7.06E-02 |
| cg18596952 | -29.43 | 8.89  | 9.28E-04 | -13.28 | 33.24 | 6.89E-01 | 90.46   | 145.61 | 5.34E-01 | -30.06 | 9.44  | 1.45E-03 | -56.47 | 45.22 | 2.12E-01 |
| cg10386914 | 46.46  | 14.03 | 9.32E-04 | 36.52  | 25.45 | 1.51E-01 | -2.02   | 72.48  | 9.78E-01 | 62.79  | 20.13 | 1.81E-03 | 28.47  | 33.80 | 4.00E-01 |
| cg00371368 | 24.22  | 7.32  | 9.42E-04 | 56.55  | 31.15 | 6.95E-02 | 31.76   | 110.66 | 7.74E-01 | 22.91  | 7.78  | 3.22E-03 | 12.00  | 31.66 | 7.05E-01 |
| cg26074618 | 46.29  | 14.00 | 9.48E-04 | 48.44  | 17.99 | 7.09E-03 | 17.50   | 49.72  | 7.25E-01 | 46.58  | 48.36 | 3.35E-01 | 50.44  | 29.15 | 8.36E-02 |
| cg19757631 | -15.96 | 4.83  | 9.50E-04 | -21.97 | 7.92  | 5.55E-03 | 0.81    | 11.93  | 9.46E-01 | -15.60 | 10.91 | 1.53E-01 | -18.13 | 9.32  | 5.16E-02 |
| cg00625351 | -21.16 | 6.41  | 9.57E-04 | -32.30 | 12.00 | 7.11E-03 | -6.02   | 18.02  | 7.38E-01 | -15.40 | 10.04 | 1.25E-01 | -27.09 | 15.01 | 7.12E-02 |
| cg22900607 | 7.59   | 2.30  | 9.58E-04 | 6.78   | 2.83  | 1.66E-02 | 1.68    | 5.35   | 7.54E-01 | 14.60  | 9.27  | 1.15E-01 | 13.46  | 5.23  | 1.00E-02 |
| cg16559727 | 27.60  | 8.37  | 9.70E-04 | 15.77  | 16.81 | 3.48E-01 | 3.83    | 42.76  | 9.29E-01 | 36.90  | 10.66 | 5.35E-04 | 8.22   | 26.79 | 7.59E-01 |
| cg08376828 | 23.39  | 7.09  | 9.71E-04 | 28.61  | 9.82  | 3.58E-03 | 7.65    | 20.06  | 7.03E-01 | -8.22  | 36.31 | 8.21E-01 | 24.80  | 12.61 | 4.92E-02 |
| cg03216261 | 33.44  | 10.14 | 9.74E-04 | 34.05  | 35.19 | 3.33E-01 | 15.56   | 167.89 | 9.26E-01 | 35.80  | 10.89 | 1.01E-03 | -10.27 | 47.03 | 8.27E-01 |
| cg19761682 | -59.63 | 18.08 | 9.76E-04 | -63.49 | 25.70 | 1.35E-02 | -7.91   | 85.32  | 9.26E-01 | -34.02 | 40.23 | 3.98E-01 | -81.29 | 35.60 | 2.24E-02 |
| cg11809107 | -12.45 | 3.78  | 9.79E-04 | -14.44 | 6.10  | 1.80E-02 | -14.18  | 9.12   | 1.20E-01 | -8.49  | 7.02  | 2.27E-01 | -13.01 | 9.57  | 1.74E-01 |
| cg10582499 | 42.40  | 12.86 | 9.81E-04 | 41.52  | 16.96 | 1.44E-02 | 40.10   | 41.84  | 3.38E-01 | 8.93   | 43.65 | 8.38E-01 | 57.29  | 26.06 | 2.79E-02 |
| cg09736194 | 15.66  | 4.75  | 9.84E-04 | 14.70  | 12.79 | 2.51E-01 | -0.78   | 20.13  | 9.69E-01 | 17.76  | 5.49  | 1.23E-03 | 6.71   | 19.68 | 7.33E-01 |
| cg20988098 | -8.44  | 2.56  | 9.88E-04 | -9.40  | 4.12  | 2.24E-02 | -5.92   | 4.80   | 2.18E-01 | -10.01 | 6.38  | 1.16E-01 | -9.01  | 6.28  | 1.52E-01 |
| cg09105442 | -11.92 | 3.62  | 9.89E-04 | -13.39 | 5.12  | 8.93E-03 | 0.43    | 8.78   | 9.61E-01 | -22.11 | 9.82  | 2.43E-02 | -11.99 | 7.11  | 9.18E-02 |
| cg23994702 | -27.72 | 8.42  | 9.94E-04 | -50.53 | 23.61 | 3.23E-02 | -173.36 | 125.80 | 1.68E-01 | -23.37 | 9.40  | 1.29E-02 | -26.78 | 32.90 | 4.16E-01 |
| cg21033632 | -11.09 | 3.37  | 1.01E-03 | -15.24 | 7.85  | 5.22E-02 | 2.06    | 16.88  | 9.03E-01 | -9.84  | 4.13  | 1.73E-02 | -16.48 | 10.19 | 1.06E-01 |
| cg10501828 | 47.55  | 14.47 | 1.01E-03 | 57.19  | 17.61 | 1.17E-03 | 42.71   | 65.21  | 5.13E-01 | 51.36  | 81.93 | 5.31E-01 | 21.48  | 29.22 | 4.62E-01 |
| cg25739943 | -23.71 | 7.21  | 1.01E-03 | -23.01 | 19.24 | 2.32E-01 | 4.26    | 29.55  | 8.85E-01 | -29.79 | 8.60  | 5.33E-04 | 2.38   | 23.24 | 9.19E-01 |
| cg01186551 | 26.11  | 7.95  | 1.02E-03 | -2.27  | 23.07 | 9.22E-01 | 22.19   | 38.13  | 5.61E-01 | 29.52  | 8.99  | 1.02E-03 | 41.65  | 33.57 | 2.15E-01 |
| cg07568344 | 46.18  | 14.06 | 1.02E-03 | 37.33  | 19.69 | 5.79E-02 | 26.26   | 41.00  | 5.22E-01 | 86.82  | 40.51 | 3.21E-02 | 53.95  | 27.99 | 5.39E-02 |
| cg05916684 | 11.86  | 3.61  | 1.02E-03 | 6.21   | 5.47  | 2.56E-01 | 19.68   | 6.73   | 3.45E-03 | 10.04  | 9.86  | 3.09E-01 | 15.08  | 9.60  | 1.16E-01 |
| cg02403541 | 42.50  | 12.94 | 1.02E-03 | 10.96  | 34.46 | 7.50E-01 | -71.48  | 145.55 | 6.23E-01 | 48.77  | 14.71 | 9.15E-04 | 49.01  | 46.74 | 2.94E-01 |

|            |        |       |          |        |       |          |        |        |          |         |       |          |        |       |          |
|------------|--------|-------|----------|--------|-------|----------|--------|--------|----------|---------|-------|----------|--------|-------|----------|
| cg02773337 | 90.05  | 27.43 | 1.03E-03 | 91.76  | 36.62 | 1.22E-02 | 264.55 | 135.20 | 5.04E-02 | 80.96   | 63.55 | 2.03E-01 | 59.57  | 59.62 | 3.18E-01 |
| cg21596825 | -20.71 | 6.31  | 1.03E-03 | -39.33 | 17.48 | 2.45E-02 | -2.23  | 32.37  | 9.45E-01 | -17.97  | 7.16  | 1.21E-02 | -28.18 | 26.97 | 2.96E-01 |
| cg09473613 | -10.68 | 3.26  | 1.03E-03 | -12.70 | 6.25  | 4.22E-02 | -13.62 | 9.75   | 1.62E-01 | -8.00   | 4.89  | 1.02E-01 | -12.49 | 7.81  | 1.10E-01 |
| cg00596687 | 55.15  | 16.81 | 1.04E-03 | 56.06  | 27.42 | 4.09E-02 | 64.82  | 30.17  | 3.17E-02 | 14.60   | 45.84 | 7.50E-01 | 66.90  | 39.72 | 9.21E-02 |
| cg23351479 | -17.91 | 5.46  | 1.04E-03 | -27.64 | 13.27 | 3.73E-02 | -13.21 | 35.93  | 7.13E-01 | -16.14  | 6.40  | 1.17E-02 | -14.84 | 19.22 | 4.40E-01 |
| cg16345311 | -8.99  | 2.74  | 1.04E-03 | -12.67 | 4.95  | 1.04E-02 | 2.55   | 6.81   | 7.08E-01 | -10.70  | 3.40  | 1.65E-03 | -9.02  | 6.19  | 1.45E-01 |
| cg13892474 | 33.83  | 10.32 | 1.04E-03 | 32.44  | 23.78 | 1.73E-01 | -37.46 | 55.58  | 5.00E-01 | 35.79   | 12.63 | 4.60E-03 | 46.68  | 31.14 | 1.34E-01 |
| cg15922305 | 18.44  | 5.63  | 1.05E-03 | 24.13  | 7.37  | 1.06E-03 | 19.53  | 13.90  | 1.60E-01 | -4.98   | 19.45 | 7.98E-01 | 9.33   | 13.70 | 4.96E-01 |
| cg19559114 | 38.02  | 11.61 | 1.06E-03 | 39.57  | 20.45 | 5.30E-02 | 25.54  | 23.14  | 2.70E-01 | 24.57   | 15.27 | 1.08E-01 | 82.11  | 26.36 | 1.84E-03 |
| cg02798801 | -12.92 | 3.95  | 1.06E-03 | -14.16 | 5.49  | 9.91E-03 | -7.53  | 8.42   | 3.71E-01 | -3.80   | 18.87 | 8.40E-01 | -17.21 | 8.41  | 4.07E-02 |
| cg04299808 | 23.61  | 7.21  | 1.06E-03 | 27.53  | 11.00 | 1.23E-02 | 34.63  | 13.68  | 1.14E-02 | 1.37    | 19.36 | 9.44E-01 | 12.86  | 18.38 | 4.84E-01 |
| cg18064219 | -68.75 | 21.00 | 1.06E-03 | -74.82 | 26.03 | 4.04E-03 | -61.12 | 119.34 | 6.09E-01 | -11.33  | 74.70 | 8.79E-01 | -72.18 | 42.98 | 9.31E-02 |
| cg24629941 | 20.57  | 6.29  | 1.07E-03 | 10.84  | 14.66 | 4.60E-01 | 31.06  | 20.18  | 1.24E-01 | 20.52   | 7.79  | 8.46E-03 | 32.47  | 24.21 | 1.80E-01 |
| cg12042264 | 17.53  | 5.36  | 1.07E-03 | 16.73  | 7.34  | 2.26E-02 | 19.39  | 12.86  | 1.32E-01 | 45.03   | 22.23 | 4.28E-02 | 11.16  | 11.08 | 3.14E-01 |
| cg18101249 | 56.15  | 17.17 | 1.08E-03 | 76.03  | 40.08 | 5.79E-02 | 13.74  | 199.95 | 9.45E-01 | 52.87   | 19.91 | 7.93E-03 | 42.45  | 67.10 | 5.27E-01 |
| cg21160429 | -16.41 | 5.02  | 1.08E-03 | -23.30 | 9.89  | 1.85E-02 | -4.53  | 10.88  | 6.77E-01 | -16.43  | 8.33  | 4.84E-02 | -20.94 | 12.33 | 8.95E-02 |
| cg14518185 | -19.18 | 5.87  | 1.08E-03 | -17.70 | 17.57 | 3.14E-01 | -20.65 | 34.38  | 5.48E-01 | -19.95  | 6.61  | 2.53E-03 | -12.35 | 22.08 | 5.76E-01 |
| cg09773238 | -20.00 | 6.12  | 1.08E-03 | -27.00 | 15.92 | 8.98E-02 | 2.20   | 17.98  | 9.02E-01 | -18.77  | 5.91  | 1.49E-03 | -44.73 | 19.64 | 2.27E-02 |
| cg25629930 | 29.45  | 9.01  | 1.09E-03 | 19.49  | 12.36 | 1.15E-01 | 29.24  | 34.19  | 3.92E-01 | 24.91   | 32.98 | 4.50E-01 | 46.91  | 15.84 | 3.07E-03 |
| cg06733568 | 39.11  | 11.97 | 1.09E-03 | 39.71  | 16.39 | 1.54E-02 | 65.81  | 25.16  | 8.91E-03 | -7.15   | 32.20 | 8.24E-01 | 40.11  | 27.16 | 1.40E-01 |
| cg03180953 | -63.03 | 19.29 | 1.09E-03 | -66.29 | 25.56 | 9.49E-03 | 27.41  | 82.37  | 7.39E-01 | -109.18 | 41.24 | 8.11E-03 | -29.85 | 42.59 | 4.83E-01 |
| cg22534724 | -13.30 | 4.07  | 1.09E-03 | -22.15 | 8.28  | 7.51E-03 | -10.21 | 12.77  | 4.24E-01 | -9.52   | 5.66  | 9.28E-02 | -14.24 | 10.90 | 1.91E-01 |
| cg11901043 | 17.22  | 5.28  | 1.10E-03 | 22.37  | 15.78 | 1.56E-01 | -4.80  | 46.29  | 9.17E-01 | 17.00   | 5.86  | 3.73E-03 | 15.52  | 20.68 | 4.53E-01 |
| cg03485840 | -15.06 | 4.62  | 1.10E-03 | -14.76 | 13.82 | 2.86E-01 | -11.14 | 22.17  | 6.15E-01 | -14.48  | 5.24  | 5.72E-03 | -24.53 | 17.52 | 1.62E-01 |
| cg15806103 | -22.14 | 6.78  | 1.10E-03 | -1.55  | 19.39 | 9.36E-01 | -18.68 | 23.11  | 4.19E-01 | -28.14  | 8.00  | 4.34E-04 | -1.26  | 25.34 | 9.60E-01 |
| cg00003965 | 12.01  | 3.68  | 1.10E-03 | 18.10  | 7.37  | 1.41E-02 | 13.28  | 10.37  | 2.00E-01 | 7.64    | 5.08  | 1.33E-01 | 18.31  | 11.72 | 1.18E-01 |
| cg10187221 | -37.48 | 11.49 | 1.11E-03 | -66.27 | 39.00 | 8.93E-02 | 83.41  | 194.25 | 6.68E-01 | -37.66  | 12.45 | 2.48E-03 | 1.73   | 48.13 | 9.71E-01 |
| cg26727666 | -15.10 | 4.63  | 1.11E-03 | -22.20 | 12.60 | 7.81E-02 | -39.38 | 18.61  | 3.43E-02 | -11.16  | 5.45  | 4.08E-02 | -19.73 | 16.20 | 2.23E-01 |
| cg16878088 | 54.93  | 16.85 | 1.11E-03 | 51.80  | 19.85 | 9.06E-03 | 93.37  | 104.96 | 3.74E-01 | 118.72  | 69.19 | 8.62E-02 | 41.96  | 38.23 | 2.72E-01 |
| cg07934552 | 13.06  | 4.01  | 1.12E-03 | 18.43  | 5.68  | 1.17E-03 | 11.30  | 10.42  | 2.78E-01 | 5.60    | 11.69 | 6.32E-01 | 6.56   | 8.24  | 4.26E-01 |
| cg10909939 | 5.93   | 1.82  | 1.12E-03 | 7.46   | 2.38  | 1.75E-03 | 5.89   | 4.37   | 1.77E-01 | -3.59   | 6.84  | 5.99E-01 | 4.71   | 4.37  | 2.80E-01 |
| cg07260849 | -11.56 | 3.55  | 1.12E-03 | -17.30 | 6.51  | 7.86E-03 | 2.52   | 12.35  | 8.38E-01 | -10.56  | 5.24  | 4.37E-02 | -11.01 | 8.80  | 2.11E-01 |
| cg04520704 | -14.78 | 4.54  | 1.12E-03 | -21.27 | 6.37  | 8.48E-04 | -16.39 | 9.68   | 9.03E-02 | 3.75    | 15.07 | 8.04E-01 | -7.97  | 8.96  | 3.74E-01 |
| cg04362790 | -20.73 | 6.37  | 1.13E-03 | -27.57 | 9.93  | 5.49E-03 | -2.02  | 12.71  | 8.74E-01 | -35.45  | 15.15 | 1.93E-02 | -19.10 | 10.19 | 6.07E-02 |
| cg23877497 | -21.29 | 6.54  | 1.13E-03 | -26.17 | 13.87 | 5.91E-02 | -15.82 | 19.96  | 4.28E-01 | -24.83  | 9.01  | 5.87E-03 | -4.94  | 17.21 | 7.74E-01 |

|            |        |       |          |         |       |          |         |        |          |        |       |          |        |       |          |
|------------|--------|-------|----------|---------|-------|----------|---------|--------|----------|--------|-------|----------|--------|-------|----------|
| cg21502255 | 28.25  | 8.68  | 1.13E-03 | 51.94   | 25.68 | 4.31E-02 | 82.68   | 59.01  | 1.61E-01 | 24.74  | 10.51 | 1.86E-02 | 20.12  | 20.30 | 3.22E-01 |
| cg20114113 | -23.32 | 7.17  | 1.13E-03 | -15.79  | 15.23 | 3.00E-01 | -13.13  | 18.50  | 4.78E-01 | -27.60 | 9.89  | 5.26E-03 | -32.52 | 22.25 | 1.44E-01 |
| cg26099018 | -13.14 | 4.04  | 1.13E-03 | -11.93  | 9.89  | 2.28E-01 | -11.05  | 11.83  | 3.51E-01 | -10.09 | 5.27  | 5.56E-02 | -30.46 | 11.22 | 6.64E-03 |
| cg01802898 | -21.41 | 6.58  | 1.14E-03 | -31.73  | 12.32 | 1.00E-02 | 4.47    | 18.09  | 8.05E-01 | -20.58 | 10.13 | 4.22E-02 | -26.52 | 16.39 | 1.06E-01 |
| cg10778994 | 16.75  | 5.15  | 1.14E-03 | 17.84   | 6.38  | 5.16E-03 | 27.94   | 13.86  | 4.39E-02 | 21.17  | 21.32 | 3.21E-01 | 0.27   | 13.19 | 9.84E-01 |
| cg11721803 | 42.03  | 12.92 | 1.14E-03 | 30.53   | 26.78 | 2.54E-01 | -18.70  | 41.57  | 6.53E-01 | 55.74  | 17.78 | 1.72E-03 | 51.12  | 34.15 | 1.34E-01 |
| cg03461298 | -36.38 | 11.18 | 1.14E-03 | -27.91  | 40.15 | 4.87E-01 | -115.77 | 192.57 | 5.48E-01 | -31.35 | 12.17 | 9.98E-03 | -98.82 | 41.02 | 1.60E-02 |
| cg06171787 | 35.06  | 10.78 | 1.14E-03 | 44.92   | 15.36 | 3.45E-03 | 15.18   | 30.93  | 6.24E-01 | 54.18  | 31.32 | 8.37E-02 | 17.51  | 20.82 | 4.01E-01 |
| cg26943658 | -72.98 | 22.43 | 1.14E-03 | -113.01 | 67.50 | 9.41E-02 | -94.04  | 218.52 | 6.67E-01 | -73.25 | 25.44 | 3.99E-03 | -25.17 | 70.43 | 7.21E-01 |
| cg24357447 | 30.18  | 9.28  | 1.15E-03 | 44.25   | 15.03 | 3.25E-03 | -0.33   | 28.22  | 9.91E-01 | 42.65  | 27.60 | 1.22E-01 | 21.45  | 14.72 | 1.45E-01 |
| cg26470924 | 24.09  | 7.41  | 1.15E-03 | 17.67   | 17.62 | 3.16E-01 | 21.38   | 31.22  | 4.94E-01 | 24.48  | 8.86  | 5.72E-03 | 39.30  | 28.63 | 1.70E-01 |
| cg12309653 | 27.44  | 8.44  | 1.15E-03 | 35.28   | 18.41 | 5.54E-02 | 12.88   | 36.22  | 7.22E-01 | 28.51  | 10.79 | 8.24E-03 | 15.23  | 23.96 | 5.25E-01 |
| cg08467185 | 49.71  | 15.29 | 1.15E-03 | 40.36   | 37.13 | 2.77E-01 | 107.01  | 164.92 | 5.16E-01 | 50.48  | 17.64 | 4.21E-03 | 57.03  | 57.62 | 3.22E-01 |
| cg17431952 | -15.03 | 4.62  | 1.15E-03 | -22.79  | 8.92  | 1.06E-02 | -3.44   | 12.29  | 7.80E-01 | -12.52 | 7.15  | 8.00E-02 | -18.53 | 11.16 | 9.67E-02 |
| cg12221580 | -13.82 | 4.25  | 1.15E-03 | -9.09   | 9.53  | 3.40E-01 | -4.61   | 12.00  | 7.01E-01 | -19.19 | 5.67  | 7.11E-04 | -5.65  | 12.65 | 6.55E-01 |
| cg16710517 | -34.12 | 10.50 | 1.16E-03 | -49.74  | 17.08 | 3.58E-03 | -27.71  | 28.45  | 3.30E-01 | -35.25 | 18.36 | 5.49E-02 | -0.11  | 26.35 | 9.97E-01 |
| cg01760983 | 16.93  | 5.21  | 1.16E-03 | 18.95   | 6.55  | 3.81E-03 | 22.52   | 22.13  | 3.09E-01 | 11.94  | 25.82 | 6.44E-01 | 11.81  | 10.01 | 2.38E-01 |
| cg03049445 | -16.48 | 5.07  | 1.16E-03 | -20.46  | 10.02 | 4.12E-02 | -2.97   | 13.53  | 8.26E-01 | -14.68 | 7.28  | 4.38E-02 | -31.36 | 14.79 | 3.40E-02 |
| cg08995368 | 32.21  | 9.92  | 1.17E-03 | 27.64   | 36.26 | 4.46E-01 | 13.27   | 157.43 | 9.33E-01 | 35.27  | 10.53 | 8.09E-04 | -36.08 | 54.09 | 5.05E-01 |
| cg13549497 | 13.85  | 4.27  | 1.17E-03 | 17.86   | 6.71  | 7.81E-03 | 4.29    | 9.67   | 6.57E-01 | 11.05  | 8.61  | 1.99E-01 | 19.85  | 10.82 | 6.65E-02 |
| cg26379707 | 45.91  | 14.14 | 1.17E-03 | 46.50   | 19.56 | 1.75E-02 | 78.75   | 31.69  | 1.29E-02 | 0.47   | 50.66 | 9.93E-01 | 29.38  | 31.61 | 3.53E-01 |
| cg03623403 | 37.44  | 11.53 | 1.17E-03 | 26.19   | 34.54 | 4.48E-01 | 105.82  | 126.37 | 4.02E-01 | 40.89  | 12.83 | 1.44E-03 | 8.15   | 42.98 | 8.50E-01 |
| cg04955333 | 17.19  | 5.30  | 1.17E-03 | 18.38   | 7.85  | 1.92E-02 | 18.25   | 10.62  | 8.57E-02 | -2.82  | 16.72 | 8.66E-01 | 23.35  | 11.98 | 5.12E-02 |
| cg25237894 | -12.96 | 3.99  | 1.17E-03 | -13.67  | 5.83  | 1.90E-02 | -18.81  | 10.18  | 6.46E-02 | 3.09   | 15.20 | 8.39E-01 | -12.55 | 7.20  | 8.13E-02 |
| cg04367107 | -12.79 | 3.94  | 1.17E-03 | -13.12  | 7.59  | 8.39E-02 | -8.14   | 12.44  | 5.13E-01 | -13.84 | 5.44  | 1.09E-02 | -11.12 | 12.16 | 3.60E-01 |
| cg23689457 | 47.23  | 14.56 | 1.18E-03 | 12.48   | 45.40 | 7.83E-01 | 106.18  | 175.44 | 5.45E-01 | 49.77  | 16.14 | 2.05E-03 | 61.50  | 52.35 | 2.40E-01 |
| cg15768620 | 20.33  | 6.26  | 1.18E-03 | 24.38   | 9.66  | 1.16E-02 | 22.84   | 14.48  | 1.15E-01 | 18.82  | 14.95 | 2.08E-01 | 11.50  | 13.46 | 3.93E-01 |
| cg06029700 | 12.06  | 3.72  | 1.19E-03 | 16.10   | 5.53  | 3.60E-03 | 4.64    | 10.12  | 6.47E-01 | 17.51  | 10.11 | 8.32E-02 | 6.42   | 7.07  | 3.64E-01 |
| cg26870570 | -23.54 | 7.26  | 1.19E-03 | -11.15  | 10.75 | 3.00E-01 | -36.37  | 14.96  | 1.51E-02 | -23.09 | 23.09 | 3.17E-01 | -36.36 | 15.88 | 2.21E-02 |
| cg12694224 | 13.93  | 4.30  | 1.19E-03 | 11.22   | 6.70  | 9.42E-02 | 21.16   | 10.45  | 4.29E-02 | 21.17  | 9.57  | 2.70E-02 | 6.75   | 9.19  | 4.63E-01 |
| cg08309041 | -40.63 | 12.54 | 1.19E-03 | -45.35  | 17.87 | 1.12E-02 | -33.81  | 43.81  | 4.40E-01 | -33.05 | 27.62 | 2.31E-01 | -39.71 | 26.77 | 1.38E-01 |
| cg11629220 | -24.49 | 7.56  | 1.20E-03 | -32.14  | 11.68 | 5.94E-03 | 5.26    | 49.09  | 9.15E-01 | -26.53 | 13.62 | 5.15E-02 | -11.97 | 15.13 | 4.29E-01 |
| cg12435677 | 28.71  | 8.86  | 1.20E-03 | 23.44   | 15.02 | 1.19E-01 | 31.45   | 16.68  | 5.93E-02 | 28.71  | 19.31 | 1.37E-01 | 35.39  | 22.26 | 1.12E-01 |
| cg14799457 | 12.81  | 3.96  | 1.20E-03 | 11.90   | 7.14  | 9.55E-02 | 12.76   | 8.49   | 1.33E-01 | 4.98   | 8.37  | 5.52E-01 | 20.85  | 7.86  | 8.01E-03 |
| cg15079315 | 13.05  | 4.03  | 1.20E-03 | 12.81   | 8.85  | 1.48E-01 | 20.28   | 13.85  | 1.43E-01 | 14.66  | 5.33  | 5.91E-03 | 2.09   | 10.96 | 8.49E-01 |



|            |        |       |          |        |       |          |         |        |          |        |       |          |        |       |          |
|------------|--------|-------|----------|--------|-------|----------|---------|--------|----------|--------|-------|----------|--------|-------|----------|
| cg00687612 | 40.48  | 12.50 | 1.21E-03 | 31.81  | 19.29 | 9.91E-02 | 45.30   | 31.52  | 1.51E-01 | 45.53  | 24.93 | 6.77E-02 | 49.91  | 30.25 | 9.89E-02 |
| cg13265869 | 26.76  | 8.27  | 1.21E-03 | 33.60  | 27.08 | 2.15E-01 | 0.95    | 87.73  | 9.91E-01 | 27.45  | 9.06  | 2.45E-03 | 11.85  | 32.20 | 7.13E-01 |
| cg07886914 | -14.06 | 4.34  | 1.21E-03 | -21.94 | 10.07 | 2.93E-02 | -25.19  | 17.26  | 1.45E-01 | -11.61 | 5.52  | 3.54E-02 | -9.07  | 11.98 | 4.49E-01 |
| cg03835292 | 20.24  | 6.25  | 1.21E-03 | 24.34  | 11.28 | 3.10E-02 | 13.74   | 19.33  | 4.77E-01 | 22.16  | 9.33  | 1.75E-02 | 9.81   | 16.80 | 5.59E-01 |
| cg10835308 | 49.59  | 15.33 | 1.22E-03 | 11.94  | 40.61 | 7.69E-01 | 265.32  | 160.26 | 9.78E-02 | 50.23  | 16.23 | 1.96E-03 | 82.95  | 52.86 | 1.17E-01 |
| cg25962358 | -10.06 | 3.11  | 1.22E-03 | -10.58 | 4.89  | 3.06E-02 | -11.59  | 6.88   | 9.17E-02 | -18.53 | 8.17  | 2.33E-02 | -2.95  | 6.28  | 6.39E-01 |
| cg08918576 | -13.74 | 4.25  | 1.23E-03 | -10.17 | 15.62 | 5.15E-01 | -14.63  | 30.27  | 6.29E-01 | -13.92 | 4.62  | 2.59E-03 | -15.33 | 17.32 | 3.76E-01 |
| cg19756700 | 54.46  | 16.85 | 1.23E-03 | 47.12  | 45.57 | 3.01E-01 | -101.58 | 237.12 | 6.68E-01 | 55.92  | 19.05 | 3.33E-03 | 63.10  | 61.09 | 3.02E-01 |
| cg01910481 | 25.51  | 7.89  | 1.23E-03 | 11.29  | 18.28 | 5.37E-01 | -19.96  | 39.20  | 6.11E-01 | 28.59  | 9.69  | 3.16E-03 | 47.92  | 23.88 | 4.48E-02 |
| cg09641919 | -55.14 | 17.06 | 1.23E-03 | -67.51 | 21.34 | 1.56E-03 | -30.40  | 75.38  | 6.87E-01 | 37.96  | 63.17 | 5.48E-01 | -55.79 | 35.09 | 1.12E-01 |
| cg24966902 | -11.64 | 3.60  | 1.23E-03 | -16.71 | 7.02  | 1.74E-02 | -6.40   | 12.45  | 6.07E-01 | -10.77 | 5.18  | 3.76E-02 | -8.86  | 8.76  | 3.12E-01 |
| cg19515530 | 32.57  | 10.08 | 1.24E-03 | 25.52  | 28.94 | 3.78E-01 | 47.63   | 78.64  | 5.45E-01 | 32.23  | 11.50 | 5.08E-03 | 41.82  | 32.89 | 2.04E-01 |
| cg01700462 | 9.84   | 3.05  | 1.24E-03 | 9.66   | 3.97  | 1.50E-02 | 11.68   | 8.00   | 1.44E-01 | 8.47   | 8.32  | 3.09E-01 | 10.00  | 8.34  | 2.31E-01 |
| cg19898108 | 23.27  | 7.20  | 1.24E-03 | 20.00  | 9.27  | 3.10E-02 | 32.00   | 21.36  | 1.34E-01 | 12.66  | 45.31 | 7.80E-01 | 28.13  | 14.22 | 4.78E-02 |
| cg26944052 | 27.78  | 8.60  | 1.24E-03 | 12.59  | 16.40 | 4.43E-01 | 36.55   | 53.18  | 4.92E-01 | 29.43  | 10.91 | 6.97E-03 | 65.91  | 31.09 | 3.40E-02 |
| cg04270347 | 47.98  | 14.86 | 1.25E-03 | 43.17  | 17.07 | 1.15E-02 | 52.26   | 100.30 | 6.02E-01 | 147.61 | 74.37 | 4.72E-02 | 45.61  | 35.01 | 1.93E-01 |
| cg05894910 | 19.42  | 6.02  | 1.25E-03 | 22.52  | 7.73  | 3.58E-03 | 11.16   | 23.10  | 6.29E-01 | 9.21   | 29.64 | 7.56E-01 | 16.28  | 11.26 | 1.48E-01 |
| cg11228717 | 17.35  | 5.38  | 1.25E-03 | 25.21  | 8.01  | 1.65E-03 | 15.16   | 11.59  | 1.91E-01 | 14.46  | 24.08 | 5.48E-01 | 7.07   | 10.08 | 4.83E-01 |
| cg00585174 | -30.26 | 9.38  | 1.25E-03 | -43.21 | 16.47 | 8.72E-03 | -21.70  | 45.51  | 6.34E-01 | -24.09 | 13.69 | 7.85E-02 | -24.57 | 23.10 | 2.88E-01 |
| cg21376004 | 25.35  | 7.85  | 1.25E-03 | 22.17  | 11.43 | 5.25E-02 | 21.75   | 15.31  | 1.55E-01 | 29.99  | 22.27 | 1.78E-01 | 38.62  | 20.94 | 6.51E-02 |
| cg22162597 | 12.39  | 3.84  | 1.25E-03 | 11.98  | 7.77  | 1.23E-01 | 5.69    | 8.22   | 4.89E-01 | 17.22  | 6.07  | 4.55E-03 | 9.70   | 10.37 | 3.49E-01 |
| cg03175030 | -29.71 | 9.21  | 1.25E-03 | -30.88 | 11.60 | 7.76E-03 | -6.03   | 25.72  | 8.15E-01 | -11.88 | 31.70 | 7.08E-01 | -53.76 | 23.17 | 2.03E-02 |
| cg20699780 | 8.63   | 2.68  | 1.26E-03 | 7.08   | 3.49  | 4.24E-02 | 13.95   | 6.25   | 2.56E-02 | 14.96  | 11.12 | 1.79E-01 | 6.13   | 6.51  | 3.46E-01 |
| cg17748822 | 17.66  | 5.48  | 1.26E-03 | 20.81  | 9.53  | 2.90E-02 | 8.14    | 13.88  | 5.58E-01 | 10.54  | 9.49  | 2.67E-01 | 33.15  | 12.85 | 9.90E-03 |
| cg02566627 | 24.54  | 7.61  | 1.26E-03 | 25.35  | 10.06 | 1.17E-02 | 36.18   | 19.48  | 6.33E-02 | 42.63  | 25.45 | 9.40E-02 | 3.78   | 17.66 | 8.31E-01 |
| cg06840743 | 8.13   | 2.52  | 1.26E-03 | 9.17   | 3.45  | 7.89E-03 | 12.62   | 6.54   | 5.37E-02 | 8.94   | 6.76  | 1.86E-01 | 0.63   | 5.99  | 9.17E-01 |
| cg20719132 | 47.86  | 14.85 | 1.27E-03 | 41.82  | 40.24 | 2.99E-01 | -26.10  | 101.49 | 7.97E-01 | 54.37  | 17.20 | 1.57E-03 | 22.70  | 47.61 | 6.34E-01 |
| cg07777540 | -27.11 | 8.41  | 1.27E-03 | 1.98   | 23.38 | 9.32E-01 | -44.13  | 49.40  | 3.72E-01 | -33.67 | 9.54  | 4.16E-04 | 1.40   | 33.23 | 9.66E-01 |
| cg11715999 | -64.46 | 20.01 | 1.28E-03 | -80.28 | 27.35 | 3.33E-03 | -124.40 | 68.53  | 6.95E-02 | -2.31  | 56.07 | 9.67E-01 | -41.99 | 39.85 | 2.92E-01 |
| cg10105917 | -17.67 | 5.49  | 1.28E-03 | -8.30  | 12.69 | 5.13E-01 | -2.90   | 25.56  | 9.10E-01 | -23.50 | 6.79  | 5.41E-04 | -5.74  | 16.19 | 7.23E-01 |
| cg03765206 | 21.80  | 6.77  | 1.28E-03 | 17.38  | 18.31 | 3.42E-01 | 53.27   | 36.55  | 1.45E-01 | 19.90  | 7.86  | 1.14E-02 | 32.49  | 22.92 | 1.56E-01 |
| cg13744822 | 56.44  | 17.53 | 1.28E-03 | 37.32  | 46.77 | 4.25E-01 | -78.12  | 221.02 | 7.24E-01 | 59.83  | 19.96 | 2.73E-03 | 67.63  | 61.20 | 2.69E-01 |
| cg18166990 | -17.98 | 5.59  | 1.29E-03 | -27.71 | 9.36  | 3.07E-03 | -11.92  | 11.70  | 3.08E-01 | -15.07 | 11.29 | 1.82E-01 | -9.95  | 13.52 | 4.61E-01 |
| cg26516489 | -26.03 | 8.09  | 1.29E-03 | -7.84  | 24.32 | 7.47E-01 | -116.64 | 113.16 | 3.03E-01 | -27.48 | 8.78  | 1.75E-03 | -34.68 | 42.62 | 4.16E-01 |
| cg05257772 | -27.72 | 8.62  | 1.29E-03 | -31.61 | 13.66 | 2.07E-02 | -28.78  | 20.87  | 1.68E-01 | -21.22 | 17.11 | 2.15E-01 | -27.27 | 20.41 | 1.81E-01 |

|            |        |       |          |        |       |          |        |        |          |        |       |          |        |       |          |
|------------|--------|-------|----------|--------|-------|----------|--------|--------|----------|--------|-------|----------|--------|-------|----------|
| cg05963618 | 38.68  | 12.02 | 1.30E-03 | 75.98  | 33.14 | 2.19E-02 | 62.32  | 68.04  | 3.60E-01 | 30.83  | 14.18 | 2.96E-02 | 38.62  | 35.03 | 2.70E-01 |
| cg01015354 | 9.93   | 3.09  | 1.30E-03 | 10.92  | 6.42  | 8.89E-02 | 1.09   | 8.31   | 8.96E-01 | 13.45  | 4.39  | 2.19E-03 | 4.41   | 8.36  | 5.97E-01 |
| cg21865845 | 16.89  | 5.25  | 1.31E-03 | 23.57  | 7.70  | 2.19E-03 | 6.16   | 13.88  | 6.57E-01 | 17.80  | 11.30 | 1.15E-01 | 6.72   | 12.59 | 5.93E-01 |
| cg02538046 | 26.00  | 8.09  | 1.31E-03 | 37.94  | 17.00 | 2.56E-02 | 35.95  | 18.51  | 5.21E-02 | 15.53  | 11.55 | 1.79E-01 | 31.64  | 26.55 | 2.33E-01 |
| cg27429080 | -29.41 | 9.15  | 1.31E-03 | 7.71   | 27.42 | 7.78E-01 | -10.60 | 85.29  | 9.01E-01 | -35.56 | 10.13 | 4.45E-04 | -18.32 | 37.33 | 6.23E-01 |
| cg08783639 | 25.26  | 7.86  | 1.32E-03 | 34.89  | 18.06 | 5.35E-02 | -30.42 | 38.15  | 4.25E-01 | 27.37  | 9.61  | 4.40E-03 | 16.40  | 25.06 | 5.13E-01 |
| cg05706117 | 28.20  | 8.79  | 1.33E-03 | 31.00  | 16.64 | 6.25E-02 | 31.27  | 27.37  | 2.53E-01 | 28.55  | 13.45 | 3.38E-02 | 21.71  | 20.06 | 2.79E-01 |
| cg25565138 | 31.51  | 9.82  | 1.33E-03 | 36.30  | 24.43 | 1.37E-01 | 51.84  | 115.17 | 6.53E-01 | 29.03  | 11.16 | 9.27E-03 | 48.85  | 41.01 | 2.34E-01 |
| cg08679800 | -15.72 | 4.90  | 1.34E-03 | -19.93 | 7.45  | 7.44E-03 | -19.92 | 11.20  | 7.52E-02 | -8.99  | 11.50 | 4.34E-01 | -8.46  | 11.12 | 4.47E-01 |
| cg18774642 | -10.08 | 3.14  | 1.34E-03 | -9.88  | 4.41  | 2.50E-02 | -13.33 | 7.13   | 6.16E-02 | 6.54   | 15.16 | 6.66E-01 | -10.80 | 6.23  | 8.29E-02 |
| cg21776667 | -13.42 | 4.18  | 1.34E-03 | -11.02 | 11.70 | 3.46E-01 | -13.24 | 24.16  | 5.84E-01 | -14.21 | 4.73  | 2.67E-03 | -8.29  | 16.95 | 6.25E-01 |
| cg15824705 | 34.56  | 10.78 | 1.34E-03 | 35.10  | 15.97 | 2.79E-02 | 70.75  | 35.72  | 4.76E-02 | 52.38  | 52.80 | 3.21E-01 | 24.16  | 16.79 | 1.50E-01 |
| cg01452581 | 32.21  | 10.05 | 1.34E-03 | 32.56  | 19.28 | 9.12E-02 | 37.99  | 18.96  | 4.51E-02 | 14.11  | 18.79 | 4.53E-01 | 53.58  | 24.98 | 3.20E-02 |
| cg26112846 | 17.56  | 5.48  | 1.35E-03 | 9.47   | 14.84 | 5.23E-01 | 33.11  | 55.91  | 5.54E-01 | 19.04  | 6.22  | 2.21E-03 | 15.12  | 19.47 | 4.37E-01 |
| cg22115808 | 57.18  | 17.85 | 1.36E-03 | 115.61 | 46.85 | 1.36E-02 | -69.82 | 203.79 | 7.32E-01 | 45.09  | 20.48 | 2.77E-02 | 76.20  | 60.23 | 2.06E-01 |
| cg01802593 | -15.44 | 4.82  | 1.36E-03 | -8.83  | 13.25 | 5.05E-01 | 1.15   | 24.10  | 9.62E-01 | -18.01 | 5.60  | 1.30E-03 | -11.18 | 16.27 | 4.92E-01 |
| cg22767408 | 33.46  | 10.44 | 1.36E-03 | 34.04  | 21.17 | 1.08E-01 | -29.00 | 67.32  | 6.67E-01 | 32.81  | 12.99 | 1.15E-02 | 54.10  | 35.59 | 1.29E-01 |
| cg23045594 | 16.18  | 5.05  | 1.36E-03 | 23.32  | 11.46 | 4.19E-02 | 7.55   | 17.87  | 6.73E-01 | 19.70  | 8.32  | 1.80E-02 | 10.60  | 8.46  | 2.10E-01 |
| cg18290848 | 23.04  | 7.20  | 1.37E-03 | 35.50  | 17.37 | 4.10E-02 | 4.50   | 27.23  | 8.69E-01 | 24.30  | 9.89  | 1.40E-02 | 16.38  | 15.08 | 2.78E-01 |
| cg04166042 | 18.16  | 5.67  | 1.38E-03 | 24.26  | 10.07 | 1.60E-02 | 2.90   | 12.53  | 8.17E-01 | 26.56  | 10.87 | 1.46E-02 | 12.80  | 12.54 | 3.08E-01 |
| cg08969102 | 23.20  | 7.25  | 1.38E-03 | 17.32  | 11.78 | 1.42E-01 | 45.20  | 15.13  | 2.81E-03 | 19.99  | 15.94 | 2.10E-01 | 11.47  | 16.88 | 4.97E-01 |
| cg14124066 | -17.70 | 5.53  | 1.38E-03 | -12.28 | 16.29 | 4.51E-01 | 5.80   | 23.03  | 8.01E-01 | -18.38 | 6.39  | 4.05E-03 | -36.39 | 19.75 | 6.54E-02 |
| cg12046867 | 33.65  | 10.52 | 1.38E-03 | 42.80  | 32.54 | 1.88E-01 | 69.62  | 152.33 | 6.48E-01 | 33.32  | 11.51 | 3.80E-03 | 18.35  | 44.58 | 6.81E-01 |
| cg27138951 | 14.93  | 4.67  | 1.38E-03 | 17.60  | 6.84  | 1.01E-02 | 15.65  | 11.46  | 1.72E-01 | 11.03  | 11.88 | 3.53E-01 | 11.39  | 10.08 | 2.59E-01 |
| cg04875709 | -56.52 | 17.67 | 1.38E-03 | -92.80 | 52.91 | 7.95E-02 | 58.10  | 251.80 | 8.18E-01 | -52.99 | 19.99 | 8.02E-03 | -49.39 | 55.37 | 3.72E-01 |
| cg16601904 | 14.89  | 4.65  | 1.38E-03 | 20.20  | 6.76  | 2.81E-03 | 3.87   | 9.60   | 6.87E-01 | 9.28   | 13.82 | 5.02E-01 | 18.86  | 11.04 | 8.76E-02 |
| cg02309655 | -19.25 | 6.02  | 1.39E-03 | 0.73   | 19.07 | 9.69E-01 | -34.89 | 34.21  | 3.08E-01 | -19.17 | 6.66  | 4.01E-03 | -49.52 | 26.42 | 6.08E-02 |
| cg23012591 | -11.09 | 3.47  | 1.39E-03 | -19.76 | 7.66  | 9.88E-03 | -2.67  | 11.66  | 8.19E-01 | -10.05 | 4.45  | 2.39E-02 | -7.01  | 11.12 | 5.29E-01 |
| cg01811109 | -11.94 | 3.74  | 1.40E-03 | -18.52 | 8.16  | 2.33E-02 | 3.28   | 15.36  | 8.31E-01 | -10.63 | 4.78  | 2.60E-02 | -14.67 | 10.82 | 1.75E-01 |
| cg12045158 | -19.91 | 6.23  | 1.40E-03 | -15.78 | 16.51 | 3.39E-01 | -8.98  | 37.60  | 8.11E-01 | -20.74 | 7.34  | 4.74E-03 | -22.64 | 18.88 | 2.30E-01 |
| cg00137634 | 41.13  | 12.89 | 1.41E-03 | 42.01  | 14.43 | 3.60E-03 | 8.46   | 65.39  | 8.97E-01 | -67.98 | 86.02 | 4.29E-01 | 62.56  | 34.32 | 6.84E-02 |
| cg09765797 | -19.46 | 6.10  | 1.41E-03 | 3.55   | 20.03 | 8.59E-01 | -10.99 | 27.40  | 6.88E-01 | -22.40 | 6.78  | 9.55E-04 | -22.87 | 27.31 | 4.02E-01 |
| cg21011827 | 16.75  | 5.25  | 1.41E-03 | 6.00   | 13.31 | 6.52E-01 | 20.56  | 54.75  | 7.07E-01 | 18.87  | 5.96  | 1.54E-03 | 16.63  | 21.55 | 4.40E-01 |
| cg03672272 | 16.27  | 5.10  | 1.42E-03 | 14.61  | 7.16  | 4.13E-02 | 12.16  | 12.47  | 3.30E-01 | 31.48  | 15.21 | 3.85E-02 | 15.45  | 11.04 | 1.62E-01 |
| cg11065575 | -6.59  | 2.07  | 1.43E-03 | -6.90  | 3.46  | 4.60E-02 | -6.17  | 4.64   | 1.83E-01 | -2.78  | 4.05  | 4.92E-01 | -11.77 | 4.80  | 1.42E-02 |

|            |        |       |          |        |       |          |         |        |          |        |        |          |        |       |          |
|------------|--------|-------|----------|--------|-------|----------|---------|--------|----------|--------|--------|----------|--------|-------|----------|
| cg12535280 | 15.15  | 4.75  | 1.43E-03 | 21.03  | 10.12 | 3.77E-02 | 5.90    | 13.20  | 6.55E-01 | 15.55  | 7.38   | 3.50E-02 | 14.00  | 9.78  | 1.53E-01 |
| cg15791108 | -10.13 | 3.18  | 1.43E-03 | -10.38 | 4.28  | 1.52E-02 | -6.84   | 6.93   | 3.24E-01 | -15.43 | 12.50  | 2.17E-01 | -11.30 | 7.60  | 1.37E-01 |
| cg25584862 | 11.62  | 3.65  | 1.44E-03 | 5.47   | 5.35  | 3.07E-01 | 18.87   | 7.85   | 1.62E-02 | 16.32  | 12.56  | 1.94E-01 | 15.48  | 7.53  | 3.99E-02 |
| cg14924671 | -14.34 | 4.50  | 1.44E-03 | -20.08 | 9.36  | 3.18E-02 | -11.86  | 20.42  | 5.62E-01 | -11.42 | 5.70   | 4.53E-02 | -20.68 | 14.47 | 1.53E-01 |
| cg22722777 | -18.18 | 5.71  | 1.45E-03 | -36.76 | 14.76 | 1.28E-02 | -6.32   | 26.93  | 8.14E-01 | -14.05 | 6.76   | 3.76E-02 | -25.79 | 18.83 | 1.71E-01 |
| cg04168494 | -19.33 | 6.07  | 1.45E-03 | -31.46 | 12.99 | 1.54E-02 | -12.04  | 28.56  | 6.73E-01 | -18.99 | 7.88   | 1.60E-02 | -4.49  | 16.07 | 7.80E-01 |
| cg02052217 | 16.29  | 5.12  | 1.46E-03 | 13.05  | 7.03  | 6.33E-02 | 22.67   | 10.92  | 3.78E-02 | 26.98  | 16.70  | 1.06E-01 | 11.86  | 12.96 | 3.60E-01 |
| cg05388963 | -24.63 | 7.74  | 1.46E-03 | -27.46 | 10.37 | 8.10E-03 | -0.56   | 20.26  | 9.78E-01 | -41.03 | 23.63  | 8.25E-02 | -25.58 | 17.78 | 1.50E-01 |
| cg09974136 | 50.86  | 15.99 | 1.46E-03 | 22.79  | 41.18 | 5.80E-01 | -52.06  | 188.48 | 7.82E-01 | 53.88  | 18.24  | 3.13E-03 | 86.70  | 58.80 | 1.40E-01 |
| cg05591447 | 16.94  | 5.32  | 1.47E-03 | 15.17  | 8.87  | 8.72E-02 | 17.43   | 8.48   | 3.98E-02 | 46.31  | 24.57  | 5.94E-02 | 12.21  | 11.94 | 3.07E-01 |
| cg05977671 | -23.30 | 7.32  | 1.47E-03 | -32.83 | 16.94 | 5.25E-02 | 3.47    | 34.42  | 9.20E-01 | -20.49 | 8.97   | 2.24E-02 | -36.11 | 22.98 | 1.16E-01 |
| cg26903766 | 24.62  | 7.74  | 1.47E-03 | 34.85  | 12.39 | 4.89E-03 | 13.90   | 14.43  | 3.35E-01 | 33.09  | 21.10  | 1.17E-01 | 13.61  | 17.94 | 4.48E-01 |
| cg22790835 | -17.27 | 5.43  | 1.47E-03 | -18.96 | 8.53  | 2.63E-02 | -21.04  | 12.53  | 9.31E-02 | -13.90 | 15.19  | 3.60E-01 | -13.83 | 10.28 | 1.79E-01 |
| cg00168634 | 35.62  | 11.21 | 1.48E-03 | 43.51  | 15.34 | 4.56E-03 | 43.14   | 34.04  | 2.05E-01 | 27.37  | 30.50  | 3.70E-01 | 18.09  | 23.73 | 4.46E-01 |
| cg20704530 | -12.26 | 3.86  | 1.48E-03 | -17.17 | 7.14  | 1.61E-02 | -11.32  | 8.81   | 1.99E-01 | -15.67 | 6.74   | 2.00E-02 | 0.35   | 8.90  | 9.69E-01 |
| cg26158950 | 62.25  | 19.59 | 1.48E-03 | 51.88  | 29.51 | 7.87E-02 | 7.88    | 58.03  | 8.92E-01 | 147.89 | 56.90  | 9.35E-03 | 62.69  | 28.89 | 3.00E-02 |
| cg14006405 | 22.18  | 6.98  | 1.49E-03 | 16.54  | 13.69 | 2.27E-01 | 28.54   | 20.98  | 1.74E-01 | 21.45  | 9.54   | 2.46E-02 | 34.62  | 22.88 | 1.30E-01 |
| cg14003265 | -11.41 | 3.59  | 1.50E-03 | -10.18 | 4.62  | 2.74E-02 | -13.37  | 7.75   | 8.44E-02 | -14.92 | 15.07  | 3.22E-01 | -12.45 | 10.29 | 2.26E-01 |
| cg07570835 | 15.66  | 4.93  | 1.50E-03 | 18.21  | 9.09  | 4.53E-02 | 17.31   | 11.78  | 1.42E-01 | 18.96  | 7.57   | 1.22E-02 | -7.46  | 15.17 | 6.23E-01 |
| cg14998460 | -25.38 | 8.00  | 1.51E-03 | -31.24 | 11.89 | 8.61E-03 | 2.78    | 21.70  | 8.98E-01 | -39.39 | 18.10  | 2.95E-02 | -18.16 | 17.21 | 2.91E-01 |
| cg05232016 | -22.60 | 7.12  | 1.51E-03 | -13.95 | 12.04 | 2.47E-01 | -29.38  | 15.35  | 5.56E-02 | -30.44 | 14.21  | 3.22E-02 | -20.41 | 16.65 | 2.20E-01 |
| cg07500019 | 39.89  | 12.58 | 1.52E-03 | 30.72  | 15.74 | 5.09E-02 | 23.23   | 37.11  | 5.31E-01 | 110.33 | 49.68  | 2.64E-02 | 57.81  | 29.49 | 5.00E-02 |
| cg25970726 | -13.05 | 4.12  | 1.52E-03 | -10.43 | 7.04  | 1.38E-01 | -14.18  | 8.70   | 1.03E-01 | -20.33 | 8.35   | 1.49E-02 | -7.15  | 9.42  | 4.48E-01 |
| cg15169988 | 16.79  | 5.30  | 1.53E-03 | 16.26  | 13.28 | 2.21E-01 | 21.48   | 11.40  | 5.95E-02 | 18.97  | 7.17   | 8.14E-03 | -10.33 | 18.96 | 5.86E-01 |
| cg09222269 | -25.89 | 8.17  | 1.54E-03 | -31.22 | 12.51 | 1.26E-02 | -0.80   | 28.61  | 9.78E-01 | -39.21 | 17.70  | 2.67E-02 | -14.86 | 15.50 | 3.38E-01 |
| cg02850933 | -69.49 | 21.94 | 1.54E-03 | -48.61 | 56.73 | 3.91E-01 | -361.91 | 348.16 | 2.99E-01 | -72.68 | 25.53  | 4.42E-03 | -65.91 | 66.83 | 3.24E-01 |
| cg11205072 | 29.22  | 9.23  | 1.55E-03 | 32.88  | 12.65 | 9.33E-03 | 12.71   | 43.39  | 7.70E-01 | 36.46  | 31.64  | 2.49E-01 | 23.82  | 15.90 | 1.34E-01 |
| cg19758054 | 40.31  | 12.74 | 1.55E-03 | 36.93  | 29.91 | 2.17E-01 | -14.11  | 75.23  | 8.51E-01 | 43.32  | 15.10  | 4.11E-03 | 40.63  | 45.51 | 3.72E-01 |
| cg04604420 | 15.85  | 5.01  | 1.56E-03 | 6.37   | 11.78 | 5.88E-01 | 8.67    | 27.96  | 7.56E-01 | 18.30  | 5.88   | 1.85E-03 | 18.71  | 20.60 | 3.64E-01 |
| cg10181414 | 7.31   | 2.31  | 1.56E-03 | 6.64   | 3.04  | 2.87E-02 | 3.67    | 6.00   | 5.41E-01 | 11.65  | 6.81   | 8.72E-02 | 9.98   | 5.81  | 8.57E-02 |
| cg07134033 | 63.47  | 20.07 | 1.56E-03 | 11.23  | 40.77 | 7.83E-01 | -80.38  | 176.50 | 6.49E-01 | 70.88  | 16.47  | 1.68E-05 | 116.77 | 50.09 | 1.97E-02 |
| cg02770857 | 13.60  | 4.30  | 1.57E-03 | 12.45  | 6.00  | 3.79E-02 | 20.53   | 11.45  | 7.30E-02 | 17.72  | 10.57  | 9.35E-02 | 7.62   | 10.16 | 4.53E-01 |
| cg05100540 | -52.05 | 16.47 | 1.57E-03 | -52.51 | 18.11 | 3.73E-03 | -157.51 | 133.71 | 2.39E-01 | 55.50  | 106.04 | 6.01E-01 | -56.59 | 45.05 | 2.09E-01 |
| cg05507566 | 7.00   | 2.21  | 1.58E-03 | 6.51   | 3.47  | 6.07E-02 | 9.31    | 5.05   | 6.54E-02 | 6.47   | 3.88   | 9.49E-02 | 5.96   | 8.04  | 4.59E-01 |
| cg21379885 | -52.00 | 16.46 | 1.58E-03 | -53.35 | 19.18 | 5.40E-03 | -212.43 | 109.46 | 5.23E-02 | -24.22 | 80.72  | 7.64E-01 | -34.56 | 36.91 | 3.49E-01 |

|            |        |       |          |        |       |          |         |        |          |         |       |          |         |       |          |
|------------|--------|-------|----------|--------|-------|----------|---------|--------|----------|---------|-------|----------|---------|-------|----------|
| cg19464419 | -16.43 | 5.21  | 1.60E-03 | -9.79  | 8.82  | 2.67E-01 | -12.19  | 17.48  | 4.86E-01 | -24.13  | 6.01  | 5.98E-05 | 1.09    | 15.97 | 9.46E-01 |
| cg11377875 | -12.33 | 3.91  | 1.60E-03 | -16.30 | 10.07 | 1.05E-01 | -5.00   | 12.34  | 6.85E-01 | -13.07  | 4.80  | 6.44E-03 | -8.23   | 13.35 | 5.38E-01 |
| cg13926569 | 24.46  | 7.75  | 1.60E-03 | 20.69  | 12.25 | 9.13E-02 | 29.48   | 15.73  | 6.10E-02 | 10.74   | 17.41 | 5.37E-01 | 43.36   | 19.43 | 2.57E-02 |
| cg05993778 | -15.11 | 4.79  | 1.61E-03 | -34.51 | 15.93 | 3.02E-02 | 11.07   | 32.14  | 7.30E-01 | -14.48  | 5.31  | 6.35E-03 | -5.99   | 17.86 | 7.37E-01 |
| cg09949949 | 19.89  | 6.31  | 1.61E-03 | 24.45  | 17.30 | 1.57E-01 | 8.99    | 67.16  | 8.94E-01 | 17.90   | 7.08  | 1.14E-02 | 36.53   | 24.83 | 1.41E-01 |
| cg01416724 | 21.71  | 6.88  | 1.61E-03 | 10.45  | 19.62 | 5.94E-01 | 25.00   | 37.21  | 5.02E-01 | 24.96   | 7.79  | 1.36E-03 | 1.36    | 27.63 | 9.61E-01 |
| cg02235659 | 11.64  | 3.69  | 1.62E-03 | 13.90  | 5.70  | 1.47E-02 | 13.46   | 7.93   | 8.96E-02 | 13.55   | 8.10  | 9.46E-02 | 0.47    | 9.36  | 9.60E-01 |
| cg03714573 | 62.79  | 19.92 | 1.62E-03 | 70.10  | 28.73 | 1.47E-02 | -83.21  | 119.88 | 4.88E-01 | 86.17   | 53.33 | 1.06E-01 | 55.00   | 33.56 | 1.01E-01 |
| cg17851046 | -30.20 | 9.58  | 1.62E-03 | -36.20 | 13.45 | 7.10E-03 | -0.68   | 24.70  | 9.78E-01 | -45.79  | 31.28 | 1.43E-01 | -29.95  | 19.27 | 1.20E-01 |
| cg16238854 | -42.10 | 13.36 | 1.63E-03 | -28.50 | 16.67 | 8.74E-02 | -35.60  | 41.19  | 3.87E-01 | -94.38  | 35.73 | 8.26E-03 | -58.33  | 37.99 | 1.25E-01 |
| cg17480278 | 20.80  | 6.60  | 1.63E-03 | 20.89  | 9.82  | 3.33E-02 | 15.00   | 16.23  | 3.56E-01 | -3.89   | 23.70 | 8.69E-01 | 30.12   | 11.96 | 1.18E-02 |
| cg19756929 | 26.19  | 8.31  | 1.63E-03 | 26.42  | 19.08 | 1.66E-01 | 18.43   | 81.52  | 8.21E-01 | 28.78   | 9.95  | 3.82E-03 | 8.78    | 26.11 | 7.37E-01 |
| cg23183906 | -65.00 | 20.63 | 1.63E-03 | -79.46 | 70.97 | 2.63E-01 | -273.30 | 248.58 | 2.72E-01 | -62.33  | 22.78 | 6.21E-03 | -59.72  | 69.60 | 3.91E-01 |
| cg22891070 | 5.58   | 1.77  | 1.63E-03 | 7.17   | 2.50  | 4.08E-03 | 4.09    | 3.60   | 2.57E-01 | 0.04    | 6.08  | 9.94E-01 | 5.76    | 4.30  | 1.81E-01 |
| cg23647884 | -54.70 | 17.37 | 1.64E-03 | -84.19 | 43.44 | 5.26E-02 | -114.54 | 286.49 | 6.89E-01 | -41.09  | 19.82 | 3.82E-02 | -134.95 | 66.28 | 4.17E-02 |
| cg18592195 | -55.09 | 17.50 | 1.64E-03 | -68.07 | 23.90 | 4.40E-03 | 13.59   | 91.38  | 8.82E-01 | -103.16 | 68.01 | 1.29E-01 | -34.01  | 29.12 | 2.43E-01 |
| cg01555981 | -25.50 | 8.10  | 1.64E-03 | -5.78  | 21.01 | 7.83E-01 | -4.36   | 40.62  | 9.14E-01 | -32.71  | 9.41  | 5.12E-04 | -3.66   | 30.28 | 9.04E-01 |
| cg15976539 | -17.97 | 5.71  | 1.64E-03 | -33.86 | 14.68 | 2.10E-02 | -6.24   | 20.46  | 7.60E-01 | -17.39  | 6.82  | 1.08E-02 | -2.75   | 21.40 | 8.98E-01 |
| cg22368281 | -16.30 | 5.18  | 1.64E-03 | -19.18 | 7.21  | 7.81E-03 | -9.71   | 12.04  | 4.20E-01 | -20.61  | 18.28 | 2.60E-01 | -13.48  | 11.05 | 2.22E-01 |
| cg20170777 | -14.16 | 4.50  | 1.64E-03 | -12.76 | 7.17  | 7.52E-02 | -19.19  | 10.39  | 6.46E-02 | -12.44  | 10.37 | 2.30E-01 | -13.87  | 9.37  | 1.39E-01 |
| cg18366748 | 24.64  | 7.83  | 1.65E-03 | 24.47  | 11.73 | 3.70E-02 | 17.41   | 23.08  | 4.51E-01 | 48.59   | 24.81 | 5.02E-02 | 20.29   | 13.42 | 1.30E-01 |
| cg04461802 | 15.02  | 4.77  | 1.65E-03 | 9.00   | 6.96  | 1.96E-01 | 22.11   | 11.59  | 5.63E-02 | 28.57   | 12.80 | 2.56E-02 | 13.88   | 10.17 | 1.72E-01 |
| cg15160686 | -19.37 | 6.16  | 1.65E-03 | -15.07 | 9.08  | 9.70E-02 | -13.26  | 14.57  | 3.63E-01 | -34.87  | 15.06 | 2.05E-02 | -21.82  | 13.94 | 1.18E-01 |
| cg05559445 | 15.88  | 5.05  | 1.65E-03 | 16.18  | 7.27  | 2.60E-02 | 21.02   | 11.83  | 7.57E-02 | 15.59   | 12.42 | 2.09E-01 | 9.84    | 12.20 | 4.20E-01 |
| cg04186606 | 70.45  | 22.40 | 1.66E-03 | 87.80  | 30.48 | 3.97E-03 | 118.65  | 50.80  | 1.95E-02 | -8.28   | 53.64 | 8.77E-01 | 58.00   | 41.39 | 1.61E-01 |
| cg14245135 | 24.32  | 7.73  | 1.66E-03 | 25.79  | 10.57 | 1.47E-02 | 32.84   | 21.12  | 1.20E-01 | 18.52   | 26.99 | 4.93E-01 | 18.48   | 15.50 | 2.33E-01 |
| cg18931760 | 12.97  | 4.12  | 1.66E-03 | 10.63  | 9.66  | 2.71E-01 | 9.74    | 12.66  | 4.42E-01 | 16.61   | 5.20  | 1.42E-03 | -5.16   | 14.26 | 7.17E-01 |
| cg09964921 | 14.89  | 4.74  | 1.67E-03 | 9.81   | 8.66  | 2.58E-01 | 15.79   | 13.86  | 2.54E-01 | 16.57   | 6.59  | 1.20E-02 | 22.91   | 18.14 | 2.07E-01 |
| cg01402347 | -11.65 | 3.71  | 1.67E-03 | -20.63 | 9.17  | 2.46E-02 | -10.08  | 14.47  | 4.86E-01 | -8.67   | 4.54  | 5.61E-02 | -17.65  | 11.47 | 1.24E-01 |
| cg22188068 | 59.90  | 19.06 | 1.67E-03 | 101.58 | 52.60 | 5.35E-02 | -181.59 | 189.28 | 3.37E-01 | 56.95   | 21.52 | 8.12E-03 | 50.27   | 70.10 | 4.73E-01 |
| cg08988364 | -26.70 | 8.50  | 1.68E-03 | -37.27 | 31.74 | 2.40E-01 | -21.66  | 85.24  | 7.99E-01 | -23.81  | 9.10  | 8.92E-03 | -65.03  | 39.08 | 9.61E-02 |
| cg12886676 | -32.68 | 10.40 | 1.68E-03 | -38.27 | 13.35 | 4.15E-03 | -4.31   | 27.02  | 8.73E-01 | -44.05  | 43.71 | 3.14E-01 | -33.55  | 23.99 | 1.62E-01 |
| cg02833116 | -51.37 | 16.36 | 1.69E-03 | -71.28 | 22.42 | 1.48E-03 | -67.53  | 102.14 | 5.09E-01 | -4.53   | 80.25 | 9.55E-01 | -28.74  | 25.85 | 2.66E-01 |
| cg21449646 | -22.59 | 7.19  | 1.69E-03 | -10.94 | 21.96 | 6.18E-01 | 10.81   | 43.86  | 8.05E-01 | -20.16  | 10.18 | 4.77E-02 | -31.76  | 11.89 | 7.54E-03 |
| cg05500783 | -15.10 | 4.81  | 1.70E-03 | -20.76 | 8.94  | 2.03E-02 | -8.41   | 18.52  | 6.50E-01 | -9.82   | 5.15  | 5.64E-02 | -34.56  | 14.23 | 1.51E-02 |

|            |        |       |          |        |       |          |         |        |          |         |       |          |        |       |          |
|------------|--------|-------|----------|--------|-------|----------|---------|--------|----------|---------|-------|----------|--------|-------|----------|
| cg21304453 | 16.36  | 5.22  | 1.71E-03 | 16.92  | 9.09  | 6.27E-02 | 16.66   | 11.20  | 1.37E-01 | 17.60   | 12.09 | 1.45E-01 | 14.57  | 10.10 | 1.49E-01 |
| cg25219318 | -77.94 | 24.85 | 1.71E-03 | -59.47 | 32.51 | 6.73E-02 | -222.66 | 143.81 | 1.22E-01 | -154.76 | 60.80 | 1.09E-02 | -55.03 | 41.34 | 1.83E-01 |
| cg12277524 | -21.25 | 6.78  | 1.71E-03 | -28.74 | 22.83 | 2.08E-01 | -19.32  | 13.06  | 1.39E-01 | -23.38  | 8.78  | 7.76E-03 | 8.42   | 31.08 | 7.87E-01 |
| cg01843946 | 22.77  | 7.26  | 1.71E-03 | 20.96  | 12.80 | 1.02E-01 | 13.27   | 19.65  | 4.99E-01 | 21.80   | 12.52 | 8.16E-02 | 33.56  | 16.04 | 3.64E-02 |
| cg15126544 | -26.93 | 8.59  | 1.71E-03 | -42.42 | 26.57 | 1.10E-01 | -9.08   | 42.68  | 8.32E-01 | -23.34  | 9.56  | 1.46E-02 | -69.65 | 39.62 | 7.88E-02 |
| cg08319074 | 26.89  | 8.58  | 1.72E-03 | 48.04  | 18.59 | 9.74E-03 | 21.93   | 21.04  | 2.97E-01 | 18.68   | 11.78 | 1.13E-01 | 34.21  | 28.38 | 2.28E-01 |
| cg07842635 | -10.58 | 3.37  | 1.72E-03 | -13.20 | 7.63  | 8.34E-02 | -16.63  | 14.50  | 2.51E-01 | -6.80   | 4.26  | 1.10E-01 | -23.04 | 9.64  | 1.68E-02 |
| cg17756105 | -12.01 | 3.83  | 1.72E-03 | -9.64  | 6.13  | 1.16E-01 | -12.10  | 7.80   | 1.21E-01 | -15.91  | 9.18  | 8.30E-02 | -13.16 | 8.70  | 1.30E-01 |
| cg11334406 | -17.36 | 5.54  | 1.72E-03 | -27.69 | 9.67  | 4.18E-03 | -10.43  | 12.78  | 4.14E-01 | -7.38   | 10.22 | 4.70E-01 | -21.81 | 12.71 | 8.62E-02 |
| cg26075905 | -62.14 | 19.83 | 1.72E-03 | -71.15 | 30.55 | 1.99E-02 | -25.19  | 54.97  | 6.47E-01 | -70.49  | 47.68 | 1.39E-01 | -60.57 | 37.76 | 1.09E-01 |
| cg27122127 | 33.43  | 10.67 | 1.73E-03 | 13.49  | 31.04 | 6.64E-01 | 40.11   | 154.38 | 7.95E-01 | 36.26   | 11.81 | 2.13E-03 | 33.72  | 43.54 | 4.39E-01 |
| cg03225444 | 11.41  | 3.64  | 1.73E-03 | 9.10   | 5.37  | 8.98E-02 | 4.84    | 8.30   | 5.60E-01 | 29.39   | 12.10 | 1.51E-02 | 13.44  | 6.52  | 3.93E-02 |
| cg24128316 | -12.09 | 3.86  | 1.75E-03 | -12.63 | 6.17  | 4.07E-02 | -11.93  | 9.09   | 1.89E-01 | -11.95  | 7.34  | 1.04E-01 | -11.15 | 9.97  | 2.64E-01 |
| cg19289921 | 12.56  | 4.01  | 1.75E-03 | 12.46  | 6.06  | 3.98E-02 | 9.50    | 9.02   | 2.92E-01 | 29.63   | 17.15 | 8.40E-02 | 11.65  | 7.24  | 1.07E-01 |
| cg09798202 | -47.24 | 15.10 | 1.75E-03 | -49.42 | 22.65 | 2.91E-02 | 12.97   | 97.25  | 8.94E-01 | -78.24  | 31.62 | 1.33E-02 | -25.55 | 27.40 | 3.51E-01 |
| cg14427009 | 16.02  | 5.12  | 1.75E-03 | 23.41  | 9.10  | 1.01E-02 | 3.90    | 14.64  | 7.90E-01 | 18.74   | 8.92  | 3.57E-02 | 8.47   | 10.62 | 4.25E-01 |
| cg13777473 | -14.96 | 4.78  | 1.76E-03 | -18.51 | 7.74  | 1.67E-02 | 2.39    | 13.33  | 8.58E-01 | -19.33  | 8.52  | 2.33E-02 | -12.09 | 11.49 | 2.93E-01 |
| cg27382405 | 38.57  | 12.33 | 1.77E-03 | 69.20  | 36.58 | 5.85E-02 | -18.67  | 134.92 | 8.90E-01 | 28.53   | 14.12 | 4.33E-02 | 79.20  | 36.43 | 2.97E-02 |
| cg02348462 | 13.92  | 4.45  | 1.77E-03 | 10.65  | 5.90  | 7.09E-02 | 23.26   | 9.92   | 1.90E-02 | 26.48   | 15.14 | 8.03E-02 | 6.11   | 11.81 | 6.05E-01 |
| cg04214966 | 11.92  | 3.82  | 1.77E-03 | 12.04  | 5.17  | 2.00E-02 | 6.90    | 9.52   | 4.69E-01 | 4.64    | 13.40 | 7.29E-01 | 18.15  | 8.23  | 2.75E-02 |
| cg14267671 | 18.75  | 6.00  | 1.78E-03 | 25.03  | 8.47  | 3.13E-03 | 13.44   | 13.05  | 3.03E-01 | 20.88   | 18.60 | 2.61E-01 | 6.46   | 14.03 | 6.45E-01 |
| cg05943554 | -19.53 | 6.25  | 1.78E-03 | -26.33 | 18.07 | 1.45E-01 | -25.17  | 36.36  | 4.89E-01 | -19.24  | 7.03  | 6.23E-03 | -7.23  | 25.31 | 7.75E-01 |
| cg10858828 | 77.29  | 24.74 | 1.78E-03 | 92.01  | 33.60 | 6.18E-03 | -67.64  | 102.46 | 5.09E-01 | 88.59   | 72.55 | 2.22E-01 | 74.32  | 46.45 | 1.10E-01 |
| cg23060513 | 9.60   | 3.07  | 1.79E-03 | 5.64   | 3.98  | 1.57E-01 | 16.14   | 5.89   | 6.16E-03 | 24.90   | 17.17 | 1.47E-01 | 10.19  | 9.13  | 2.64E-01 |
| cg25384906 | 40.11  | 12.84 | 1.79E-03 | 32.15  | 17.24 | 6.23E-02 | 18.44   | 35.11  | 6.00E-01 | 63.89   | 42.72 | 1.35E-01 | 63.49  | 27.31 | 2.01E-02 |
| cg16224951 | 39.00  | 12.49 | 1.79E-03 | 30.69  | 13.93 | 2.75E-02 | 111.08  | 61.56  | 7.12E-02 | 94.95   | 77.01 | 2.18E-01 | 56.48  | 34.86 | 1.05E-01 |
| cg04737087 | -13.80 | 4.42  | 1.80E-03 | -13.38 | 5.99  | 2.54E-02 | -7.20   | 11.25  | 5.22E-01 | -4.62   | 15.03 | 7.58E-01 | -23.39 | 9.58  | 1.46E-02 |
| cg04724659 | -9.69  | 3.10  | 1.80E-03 | -8.27  | 5.59  | 1.39E-01 | -6.46   | 9.89   | 5.14E-01 | -14.67  | 4.70  | 1.80E-03 | -0.64  | 7.85  | 9.35E-01 |
| cg25332717 | -23.88 | 7.65  | 1.80E-03 | -41.63 | 13.53 | 2.09E-03 | -12.05  | 16.12  | 4.55E-01 | -13.89  | 14.00 | 3.21E-01 | -23.70 | 19.37 | 2.21E-01 |
| cg23665824 | 32.26  | 10.34 | 1.80E-03 | 20.31  | 26.69 | 4.47E-01 | 36.18   | 46.24  | 4.34E-01 | 34.05   | 12.50 | 6.46E-03 | 35.41  | 30.27 | 2.42E-01 |
| cg01643690 | -17.93 | 5.75  | 1.81E-03 | -19.90 | 8.82  | 2.41E-02 | -19.68  | 14.21  | 1.66E-01 | -28.84  | 14.14 | 4.14E-02 | -6.09  | 11.56 | 5.98E-01 |
| cg11530213 | -7.46  | 2.39  | 1.81E-03 | -6.30  | 3.52  | 7.32E-02 | -4.77   | 4.90   | 3.31E-01 | -19.65  | 8.75  | 2.47E-02 | -8.63  | 5.04  | 8.64E-02 |
| cg22745355 | 96.18  | 30.83 | 1.81E-03 | 82.45  | 41.39 | 4.64E-02 | 312.62  | 165.29 | 5.86E-02 | 38.57   | 85.61 | 6.52E-01 | 123.12 | 58.18 | 3.43E-02 |
| cg03865667 | 14.86  | 4.76  | 1.81E-03 | 19.69  | 7.46  | 8.28E-03 | 16.42   | 16.92  | 3.32E-01 | 13.53   | 8.37  | 1.06E-01 | 6.07   | 10.94 | 5.79E-01 |
| cg16313807 | -7.79  | 2.50  | 1.81E-03 | -11.62 | 3.17  | 2.45E-04 | -4.96   | 5.33   | 3.52E-01 | -6.77   | 7.58  | 3.72E-01 | -0.84  | 5.66  | 8.82E-01 |

|            |        |       |          |        |       |          |        |        |          |         |       |          |        |       |          |
|------------|--------|-------|----------|--------|-------|----------|--------|--------|----------|---------|-------|----------|--------|-------|----------|
| cg09826364 | 6.57   | 2.11  | 1.81E-03 | 5.13   | 2.95  | 8.21E-02 | 5.90   | 5.19   | 2.56E-01 | 8.02    | 5.77  | 1.64E-01 | 9.96   | 4.80  | 3.80E-02 |
| cg18182038 | 34.94  | 11.20 | 1.81E-03 | 41.44  | 14.15 | 3.40E-03 | 68.58  | 41.68  | 9.99E-02 | -0.59   | 54.87 | 9.91E-01 | 15.56  | 21.99 | 4.79E-01 |
| cg22545027 | -56.40 | 18.08 | 1.81E-03 | -47.01 | 22.51 | 3.68E-02 | 37.63  | 66.45  | 5.71E-01 | -100.08 | 42.60 | 1.88E-02 | -70.27 | 30.89 | 2.29E-02 |
| cg01022939 | 21.87  | 7.01  | 1.82E-03 | 12.22  | 15.88 | 4.42E-01 | -13.11 | 25.37  | 6.05E-01 | 27.14   | 9.03  | 2.64E-03 | 32.79  | 19.80 | 9.76E-02 |
| cg10588705 | 29.22  | 9.37  | 1.82E-03 | 11.37  | 16.35 | 4.87E-01 | 38.22  | 18.28  | 3.66E-02 | 23.94   | 15.41 | 1.20E-01 | 60.29  | 23.26 | 9.54E-03 |
| cg15357078 | -52.71 | 16.90 | 1.82E-03 | -77.72 | 23.40 | 8.94E-04 | -17.72 | 71.20  | 8.03E-01 | -31.09  | 38.16 | 4.15E-01 | -22.41 | 35.57 | 5.29E-01 |
| cg00893348 | -71.86 | 23.05 | 1.82E-03 | -86.87 | 30.22 | 4.05E-03 | 40.55  | 88.90  | 6.48E-01 | -104.62 | 58.67 | 7.45E-02 | -40.28 | 51.92 | 4.38E-01 |
| cg08582957 | 22.85  | 7.33  | 1.83E-03 | 25.52  | 13.07 | 5.09E-02 | 31.51  | 14.43  | 2.89E-02 | 25.50   | 11.61 | 2.80E-02 | -14.47 | 22.56 | 5.21E-01 |
| cg15164472 | -11.94 | 3.83  | 1.83E-03 | -7.00  | 5.99  | 2.43E-01 | -21.20 | 8.42   | 1.18E-02 | -12.36  | 8.66  | 1.54E-01 | -12.01 | 8.79  | 1.72E-01 |
| cg19876649 | -13.72 | 4.40  | 1.83E-03 | -18.78 | 9.22  | 4.18E-02 | -5.15  | 15.93  | 7.47E-01 | -12.16  | 5.89  | 3.89E-02 | -16.47 | 11.92 | 1.67E-01 |
| cg15491134 | -11.92 | 3.83  | 1.84E-03 | -18.29 | 7.97  | 2.16E-02 | -10.71 | 12.23  | 3.82E-01 | -9.22   | 5.21  | 7.66E-02 | -12.73 | 10.55 | 2.28E-01 |
| cg02223028 | 21.36  | 6.86  | 1.84E-03 | 21.19  | 20.19 | 2.94E-01 | 41.54  | 31.75  | 1.91E-01 | 18.74   | 7.78  | 1.60E-02 | 39.49  | 27.70 | 1.54E-01 |
| cg02913553 | 14.34  | 4.60  | 1.84E-03 | 14.34  | 6.60  | 2.98E-02 | 26.92  | 11.39  | 1.81E-02 | 3.04    | 13.14 | 8.17E-01 | 11.39  | 9.64  | 2.37E-01 |
| cg22335802 | 15.78  | 5.07  | 1.84E-03 | 14.56  | 7.05  | 3.88E-02 | 9.83   | 10.35  | 3.42E-01 | 25.35   | 17.90 | 1.57E-01 | 23.72  | 12.54 | 5.86E-02 |
| cg25620356 | 27.71  | 8.90  | 1.84E-03 | 39.70  | 11.81 | 7.71E-04 | 16.13  | 28.35  | 5.69E-01 | 31.31   | 33.46 | 3.49E-01 | 5.17   | 17.36 | 7.66E-01 |
| cg02266878 | -18.80 | 6.04  | 1.84E-03 | -26.54 | 9.74  | 6.44E-03 | -5.51  | 17.39  | 7.51E-01 | -16.45  | 12.34 | 1.82E-01 | -15.65 | 11.92 | 1.89E-01 |
| cg09699787 | 11.44  | 3.67  | 1.84E-03 | 13.25  | 5.62  | 1.84E-02 | 12.41  | 8.47   | 1.43E-01 | 7.37    | 10.56 | 4.85E-01 | 9.68   | 7.13  | 1.75E-01 |
| cg13854962 | -24.36 | 7.83  | 1.86E-03 | -37.04 | 12.25 | 2.50E-03 | -11.60 | 17.19  | 5.00E-01 | -19.45  | 21.77 | 3.72E-01 | -16.95 | 15.49 | 2.74E-01 |
| cg13534734 | 32.27  | 10.37 | 1.86E-03 | 26.59  | 14.85 | 7.33E-02 | 19.90  | 38.78  | 6.08E-01 | 46.59   | 52.11 | 3.71E-01 | 39.95  | 16.36 | 1.46E-02 |
| cg20276402 | 10.22  | 3.28  | 1.86E-03 | 10.63  | 5.01  | 3.40E-02 | 5.59   | 5.75   | 3.30E-01 | 12.00   | 16.24 | 4.60E-01 | 16.39  | 7.27  | 2.42E-02 |
| cg14602640 | -37.23 | 11.97 | 1.86E-03 | -29.73 | 52.18 | 5.69E-01 | -97.54 | 215.48 | 6.51E-01 | -35.74  | 12.57 | 4.45E-03 | -78.81 | 61.80 | 2.02E-01 |
| cg10969550 | 22.93  | 7.37  | 1.87E-03 | 53.14  | 20.18 | 8.46E-03 | 36.61  | 36.82  | 3.20E-01 | 18.06   | 8.49  | 3.34E-02 | 10.46  | 27.38 | 7.03E-01 |
| cg08230332 | 30.27  | 9.73  | 1.87E-03 | 67.36  | 30.31 | 2.62E-02 | 12.61  | 71.37  | 8.60E-01 | 23.67   | 11.81 | 4.50E-02 | 35.25  | 21.82 | 1.06E-01 |
| cg16462297 | -18.26 | 5.87  | 1.87E-03 | -18.63 | 16.28 | 2.53E-01 | -21.92 | 18.79  | 2.43E-01 | -16.68  | 7.07  | 1.83E-02 | -26.52 | 20.40 | 1.94E-01 |
| cg08250081 | 12.14  | 3.91  | 1.88E-03 | 9.43   | 5.65  | 9.50E-02 | 20.87  | 9.21   | 2.34E-02 | 8.74    | 9.21  | 3.43E-01 | 14.24  | 9.70  | 1.42E-01 |
| cg11060907 | 40.05  | 12.88 | 1.88E-03 | 36.92  | 16.83 | 2.82E-02 | 19.71  | 48.31  | 6.83E-01 | 33.14   | 32.05 | 3.01E-01 | 64.36  | 30.28 | 3.36E-02 |
| cg13546977 | -33.97 | 10.93 | 1.88E-03 | -51.02 | 19.69 | 9.57E-03 | 7.70   | 28.16  | 7.85E-01 | -37.61  | 19.26 | 5.09E-02 | -33.31 | 23.32 | 1.53E-01 |
| cg14491820 | 20.30  | 6.53  | 1.88E-03 | 26.97  | 19.52 | 1.67E-01 | 23.21  | 42.61  | 5.86E-01 | 20.61   | 7.50  | 5.98E-03 | 10.35  | 20.09 | 6.06E-01 |
| cg10136168 | 17.44  | 5.61  | 1.89E-03 | 15.94  | 7.72  | 3.89E-02 | 17.82  | 12.42  | 1.51E-01 | 24.74   | 16.86 | 1.42E-01 | 16.81  | 14.17 | 2.35E-01 |
| cg09640425 | 4.55   | 1.46  | 1.89E-03 | 2.45   | 2.25  | 2.78E-01 | 6.88   | 2.87   | 1.66E-02 | 4.62    | 4.83  | 3.38E-01 | 5.79   | 3.09  | 6.11E-02 |
| cg07472772 | 35.83  | 11.53 | 1.89E-03 | 38.51  | 26.74 | 1.50E-01 | 73.62  | 68.00  | 2.79E-01 | 34.28   | 13.98 | 1.42E-02 | 30.73  | 35.64 | 3.89E-01 |
| cg07123811 | 54.23  | 17.45 | 1.89E-03 | 56.95  | 20.80 | 6.18E-03 | 19.71  | 93.15  | 8.32E-01 | 13.43   | 55.60 | 8.09E-01 | 74.69  | 43.34 | 8.48E-02 |
| cg26482164 | 16.66  | 5.36  | 1.89E-03 | 22.00  | 7.92  | 5.48E-03 | 9.54   | 15.58  | 5.40E-01 | 21.05   | 10.34 | 4.17E-02 | -1.42  | 13.67 | 9.17E-01 |
| cg12513379 | -9.97  | 3.21  | 1.89E-03 | -8.14  | 5.04  | 1.06E-01 | -9.24  | 6.72   | 1.69E-01 | -10.90  | 7.81  | 1.63E-01 | -13.79 | 7.22  | 5.63E-02 |
| cg12134633 | 8.48   | 2.73  | 1.89E-03 | 8.36   | 4.22  | 4.79E-02 | 9.15   | 4.91   | 6.23E-02 | 12.58   | 9.96  | 2.06E-01 | 6.14   | 6.15  | 3.18E-01 |

|            |        |       |          |        |       |          |         |        |          |         |       |          |        |       |          |
|------------|--------|-------|----------|--------|-------|----------|---------|--------|----------|---------|-------|----------|--------|-------|----------|
| cg19955318 | 39.95  | 12.86 | 1.90E-03 | 43.73  | 18.53 | 1.83E-02 | 27.70   | 39.29  | 4.81E-01 | 31.49   | 27.11 | 2.46E-01 | 47.46  | 29.81 | 1.11E-01 |
| cg02944123 | -13.31 | 4.29  | 1.90E-03 | -16.06 | 8.99  | 7.41E-02 | -18.51  | 16.76  | 2.69E-01 | -14.98  | 5.65  | 8.08E-03 | 1.20   | 11.77 | 9.19E-01 |
| cg08456993 | -16.26 | 5.24  | 1.91E-03 | -32.12 | 16.84 | 5.64E-02 | 0.03    | 21.41  | 9.99E-01 | -14.93  | 5.98  | 1.26E-02 | -22.22 | 18.86 | 2.39E-01 |
| cg11173131 | 9.87   | 3.18  | 1.91E-03 | 10.89  | 4.10  | 7.96E-03 | 12.18   | 8.44   | 1.49E-01 | 3.69    | 10.10 | 7.15E-01 | 7.79   | 7.96  | 3.28E-01 |
| cg25065716 | -6.26  | 2.02  | 1.91E-03 | -4.69  | 3.23  | 1.47E-01 | -4.20   | 4.48   | 3.48E-01 | -6.26   | 3.94  | 1.12E-01 | -13.17 | 5.24  | 1.20E-02 |
| cg25092247 | 25.33  | 8.16  | 1.92E-03 | 26.09  | 31.14 | 4.02E-01 | 6.91    | 125.40 | 9.56E-01 | 27.42   | 8.73  | 1.69E-03 | -8.62  | 35.41 | 8.08E-01 |
| cg01577604 | 20.68  | 6.66  | 1.92E-03 | 21.58  | 9.14  | 1.82E-02 | 23.49   | 14.80  | 1.13E-01 | -8.04   | 20.83 | 6.99E-01 | 32.28  | 16.52 | 5.07E-02 |
| cg19872335 | 30.62  | 9.87  | 1.92E-03 | 26.20  | 10.78 | 1.51E-02 | 74.10   | 49.58  | 1.35E-01 | 68.99   | 40.62 | 8.94E-02 | 26.12  | 39.44 | 5.08E-01 |
| cg07002382 | -18.27 | 5.89  | 1.92E-03 | -27.78 | 17.11 | 1.04E-01 | -31.05  | 58.42  | 5.95E-01 | -16.59  | 6.53  | 1.11E-02 | -20.18 | 24.38 | 4.08E-01 |
| cg11053466 | -18.08 | 5.83  | 1.93E-03 | -23.76 | 9.23  | 1.00E-02 | -7.56   | 13.58  | 5.78E-01 | -24.76  | 14.89 | 9.63E-02 | -12.94 | 11.36 | 2.54E-01 |
| cg01996325 | 30.00  | 9.68  | 1.94E-03 | 19.67  | 22.70 | 3.86E-01 | 44.90   | 51.33  | 3.82E-01 | 29.41   | 11.64 | 1.15E-02 | 49.30  | 32.06 | 1.24E-01 |
| cg14650577 | 31.48  | 10.15 | 1.94E-03 | 40.85  | 35.23 | 2.46E-01 | 17.83   | 142.63 | 9.01E-01 | 31.43   | 11.07 | 4.51E-03 | 21.89  | 38.35 | 5.68E-01 |
| cg22971939 | -20.24 | 6.53  | 1.94E-03 | -25.48 | 13.95 | 6.78E-02 | -5.91   | 17.57  | 7.37E-01 | -24.67  | 9.60  | 1.02E-02 | -13.48 | 15.37 | 3.80E-01 |
| cg22051199 | -20.32 | 6.56  | 1.94E-03 | -27.76 | 11.63 | 1.70E-02 | -17.02  | 24.95  | 4.95E-01 | -10.94  | 9.26  | 2.37E-01 | -43.08 | 19.55 | 2.76E-02 |
| cg05595301 | 13.60  | 4.39  | 1.94E-03 | 13.12  | 7.00  | 6.10E-02 | 18.81   | 9.43   | 4.60E-02 | 9.10    | 9.85  | 3.55E-01 | 13.34  | 9.99  | 1.82E-01 |
| cg27582986 | -68.70 | 22.17 | 1.94E-03 | -61.44 | 33.04 | 6.30E-02 | 129.93  | 128.48 | 3.12E-01 | -100.68 | 43.35 | 2.02E-02 | -71.87 | 43.58 | 9.91E-02 |
| cg10806318 | -20.26 | 6.54  | 1.94E-03 | -31.16 | 9.71  | 1.33E-03 | -4.98   | 17.63  | 7.78E-01 | -12.31  | 16.65 | 4.60E-01 | -13.95 | 12.94 | 2.81E-01 |
| cg14402955 | 20.88  | 6.74  | 1.95E-03 | 24.83  | 12.82 | 5.28E-02 | 22.41   | 13.73  | 1.03E-01 | 18.05   | 10.56 | 8.74E-02 | 16.75  | 24.42 | 4.93E-01 |
| cg08902940 | -11.32 | 3.66  | 1.95E-03 | -11.29 | 5.79  | 5.11E-02 | -15.96  | 8.01   | 4.63E-02 | -14.91  | 8.25  | 7.08E-02 | -2.90  | 8.24  | 7.25E-01 |
| cg26744490 | -59.18 | 19.11 | 1.95E-03 | -76.93 | 51.96 | 1.39E-01 | -358.42 | 251.26 | 1.54E-01 | -62.05  | 21.89 | 4.58E-03 | 5.96   | 61.33 | 9.23E-01 |
| cg03041030 | 45.19  | 14.59 | 1.96E-03 | 52.17  | 19.26 | 6.75E-03 | 72.02   | 42.20  | 8.79E-02 | -9.49   | 36.09 | 7.93E-01 | 57.23  | 38.61 | 1.38E-01 |
| cg02838492 | 10.44  | 3.37  | 1.96E-03 | 7.95   | 4.72  | 9.19E-02 | 8.83    | 6.73   | 1.90E-01 | 6.89    | 13.25 | 6.03E-01 | 21.39  | 8.09  | 8.19E-03 |
| cg10893908 | -12.85 | 4.15  | 1.96E-03 | -17.18 | 6.25  | 5.96E-03 | -13.92  | 9.52   | 1.44E-01 | -10.08  | 11.83 | 3.94E-01 | -5.62  | 8.38  | 5.03E-01 |
| cg25937790 | -12.46 | 4.02  | 1.96E-03 | -9.42  | 7.82  | 2.28E-01 | -18.15  | 17.00  | 2.86E-01 | -11.36  | 5.32  | 3.29E-02 | -22.77 | 12.25 | 6.30E-02 |
| cg03341469 | -9.72  | 3.14  | 1.97E-03 | -10.11 | 4.24  | 1.70E-02 | -10.38  | 6.68   | 1.20E-01 | -16.51  | 21.25 | 4.37E-01 | -7.26  | 6.89  | 2.92E-01 |
| cg11012980 | 46.63  | 15.07 | 1.97E-03 | 57.90  | 55.22 | 2.94E-01 | 76.12   | 244.91 | 7.56E-01 | 48.11   | 16.14 | 2.87E-03 | 2.10   | 67.17 | 9.75E-01 |
| cg14213692 | -12.58 | 4.06  | 1.97E-03 | -7.55  | 5.97  | 2.06E-01 | -8.05   | 9.47   | 3.95E-01 | -16.58  | 13.05 | 2.04E-01 | -23.41 | 8.03  | 3.57E-03 |
| cg20195319 | -19.30 | 6.23  | 1.97E-03 | -16.64 | 18.58 | 3.70E-01 | -6.64   | 34.47  | 8.47E-01 | -20.54  | 7.01  | 3.38E-03 | -15.03 | 24.76 | 5.44E-01 |
| cg11149658 | 36.09  | 11.66 | 1.97E-03 | 45.79  | 17.21 | 7.79E-03 | 55.92   | 23.43  | 1.70E-02 | 11.50   | 35.19 | 7.44E-01 | 4.36   | 25.66 | 8.65E-01 |
| cg14290450 | -14.26 | 4.61  | 1.97E-03 | -25.99 | 12.65 | 3.99E-02 | -5.57   | 21.92  | 7.99E-01 | -12.23  | 5.35  | 2.23E-02 | -18.24 | 16.06 | 2.56E-01 |
| cg00645339 | -58.87 | 19.02 | 1.97E-03 | 3.73   | 47.47 | 9.37E-01 | -217.16 | 257.27 | 3.99E-01 | -75.92  | 22.25 | 6.45E-04 | -27.13 | 59.26 | 6.47E-01 |
| cg20826024 | -20.34 | 6.57  | 1.98E-03 | -7.48  | 14.66 | 6.10E-01 | -21.55  | 20.99  | 3.05E-01 | -22.78  | 8.36  | 6.46E-03 | -31.89 | 22.80 | 1.62E-01 |
| cg15516558 | 8.49   | 2.74  | 1.99E-03 | 7.07   | 3.59  | 4.88E-02 | 13.77   | 6.08   | 2.35E-02 | 17.15   | 8.96  | 5.55E-02 | 0.25   | 7.60  | 9.74E-01 |
| cg15929797 | 11.14  | 3.60  | 1.99E-03 | 16.75  | 6.11  | 6.09E-03 | -1.04   | 8.48   | 9.02E-01 | 14.74   | 5.86  | 1.20E-02 | 7.94   | 6.91  | 2.51E-01 |
| cg00270974 | -22.66 | 7.33  | 2.00E-03 | -23.80 | 14.73 | 1.06E-01 | 0.32    | 37.85  | 9.93E-01 | -27.80  | 9.36  | 2.97E-03 | 2.85   | 23.08 | 9.02E-01 |

|            |        |       |          |        |       |          |         |        |          |         |       |          |        |       |          |
|------------|--------|-------|----------|--------|-------|----------|---------|--------|----------|---------|-------|----------|--------|-------|----------|
| cg05937687 | -16.42 | 5.31  | 2.00E-03 | -30.22 | 8.00  | 1.58E-04 | -18.20  | 11.95  | 1.28E-01 | -10.10  | 4.55  | 2.65E-02 | -9.75  | 10.99 | 3.75E-01 |
| cg13244315 | -37.76 | 12.23 | 2.02E-03 | -50.95 | 20.73 | 1.40E-02 | 49.90   | 83.00  | 5.48E-01 | -35.32  | 19.62 | 7.18E-02 | -30.56 | 24.88 | 2.19E-01 |
| cg17907457 | -16.89 | 5.47  | 2.02E-03 | -12.47 | 12.04 | 3.00E-01 | -16.84  | 17.70  | 3.41E-01 | -15.09  | 6.89  | 2.85E-02 | -47.88 | 21.24 | 2.41E-02 |
| cg11010909 | -22.94 | 7.43  | 2.02E-03 | -29.08 | 10.69 | 6.51E-03 | 9.05    | 23.29  | 6.98E-01 | -37.86  | 20.78 | 6.85E-02 | -17.29 | 13.86 | 2.12E-01 |
| cg11664652 | 20.46  | 6.63  | 2.03E-03 | 35.54  | 20.14 | 7.77E-02 | 32.91   | 24.15  | 1.73E-01 | 17.13   | 7.58  | 2.38E-02 | 19.92  | 29.19 | 4.95E-01 |
| cg18608389 | 38.10  | 12.35 | 2.03E-03 | 12.92  | 47.30 | 7.85E-01 | 184.99  | 179.85 | 3.04E-01 | 42.62   | 13.41 | 1.48E-03 | 2.77   | 43.75 | 9.50E-01 |
| cg10022248 | -17.29 | 5.61  | 2.04E-03 | -20.01 | 8.20  | 1.47E-02 | -24.59  | 14.51  | 9.02E-02 | -22.15  | 12.70 | 8.12E-02 | 0.25   | 12.92 | 9.85E-01 |
| cg05148217 | -61.74 | 20.02 | 2.04E-03 | -54.94 | 28.07 | 5.03E-02 | -87.24  | 73.97  | 2.38E-01 | -104.73 | 51.81 | 4.33E-02 | -43.80 | 38.59 | 2.56E-01 |
| cg10506549 | 70.22  | 22.77 | 2.04E-03 | 86.49  | 70.09 | 2.17E-01 | -92.63  | 307.76 | 7.63E-01 | 78.83   | 25.09 | 1.68E-03 | -50.14 | 88.77 | 5.72E-01 |
| cg25694447 | 38.04  | 12.34 | 2.04E-03 | 28.31  | 18.46 | 1.25E-01 | 36.86   | 31.58  | 2.43E-01 | 41.90   | 36.69 | 2.53E-01 | 52.25  | 22.99 | 2.30E-02 |
| cg00238662 | 32.94  | 10.68 | 2.05E-03 | 24.67  | 20.38 | 2.26E-01 | 42.97   | 21.24  | 4.30E-02 | 41.13   | 19.55 | 3.54E-02 | 17.32  | 25.64 | 4.99E-01 |
| cg27528222 | -44.23 | 14.35 | 2.05E-03 | -50.77 | 25.73 | 4.85E-02 | -105.70 | 70.41  | 1.33E-01 | -57.35  | 23.74 | 1.57E-02 | -11.04 | 27.00 | 6.83E-01 |
| cg09018441 | 37.06  | 12.02 | 2.05E-03 | 57.82  | 28.53 | 4.27E-02 | -12.58  | 117.63 | 9.15E-01 | 34.64   | 14.02 | 1.35E-02 | 19.04  | 43.38 | 6.61E-01 |
| cg02385474 | -17.66 | 5.73  | 2.05E-03 | -20.01 | 10.49 | 5.65E-02 | -0.34   | 12.88  | 9.79E-01 | -21.08  | 10.26 | 3.99E-02 | -26.32 | 13.08 | 4.42E-02 |
| cg11486935 | 8.40   | 2.72  | 2.06E-03 | 7.94   | 5.10  | 1.19E-01 | 11.94   | 6.24   | 5.56E-02 | 8.86    | 4.14  | 3.25E-02 | 0.19   | 9.04  | 9.83E-01 |
| cg11470337 | -23.06 | 7.48  | 2.06E-03 | -26.91 | 13.09 | 3.98E-02 | 4.75    | 22.51  | 8.33E-01 | -24.42  | 13.44 | 6.93E-02 | -28.55 | 14.86 | 5.48E-02 |
| cg02059950 | -22.87 | 7.42  | 2.06E-03 | -10.48 | 18.91 | 5.80E-01 | 21.20   | 31.30  | 4.98E-01 | -29.46  | 8.70  | 7.08E-04 | -18.47 | 26.90 | 4.92E-01 |
| cg11204139 | 8.42   | 2.73  | 2.06E-03 | 6.37   | 3.49  | 6.84E-02 | 14.00   | 5.62   | 1.27E-02 | 3.40    | 12.18 | 7.80E-01 | 10.27  | 8.57  | 2.31E-01 |
| cg15165676 | 16.21  | 5.26  | 2.06E-03 | 14.06  | 6.72  | 3.64E-02 | 10.48   | 12.75  | 4.11E-01 | 2.86    | 25.23 | 9.10E-01 | 32.77  | 12.63 | 9.49E-03 |
| cg14486995 | -16.61 | 5.39  | 2.07E-03 | -19.65 | 16.76 | 2.41E-01 | 19.47   | 21.54  | 3.66E-01 | -18.98  | 6.16  | 2.08E-03 | -18.55 | 20.59 | 3.68E-01 |
| cg27036456 | -12.16 | 3.95  | 2.07E-03 | -11.45 | 10.28 | 2.65E-01 | -33.04  | 24.05  | 1.69E-01 | -11.74  | 4.54  | 9.66E-03 | -10.07 | 14.98 | 5.01E-01 |
| cg12996171 | 24.80  | 8.05  | 2.07E-03 | 18.58  | 11.08 | 9.36E-02 | 44.29   | 16.50  | 7.28E-03 | 16.54   | 27.79 | 5.52E-01 | 20.40  | 20.83 | 3.27E-01 |
| cg24364144 | 18.34  | 5.96  | 2.08E-03 | 30.93  | 14.84 | 3.71E-02 | 12.96   | 27.84  | 6.41E-01 | 16.29   | 7.15  | 2.27E-02 | 14.69  | 18.96 | 4.39E-01 |
| cg08223717 | 17.16  | 5.57  | 2.08E-03 | 23.24  | 11.39 | 4.12E-02 | 13.80   | 20.03  | 4.91E-01 | 18.94   | 7.21  | 8.61E-03 | -9.32  | 19.08 | 6.25E-01 |
| cg01970336 | -17.08 | 5.55  | 2.08E-03 | -15.08 | 8.42  | 7.34E-02 | -31.65  | 12.94  | 1.44E-02 | -2.27   | 14.42 | 8.75E-01 | -18.72 | 11.47 | 1.03E-01 |
| cg05578937 | -56.52 | 18.36 | 2.08E-03 | -60.51 | 23.15 | 8.95E-03 | -167.57 | 79.82  | 3.58E-02 | -35.00  | 71.01 | 6.22E-01 | -28.87 | 36.61 | 4.30E-01 |
| cg24059197 | 54.86  | 17.82 | 2.09E-03 | 64.46  | 45.46 | 1.56E-01 | -155.42 | 177.27 | 3.81E-01 | 56.09   | 20.55 | 6.35E-03 | 51.58  | 61.50 | 4.02E-01 |
| cg09198866 | 24.07  | 7.82  | 2.10E-03 | 36.60  | 21.18 | 8.41E-02 | 8.13    | 28.65  | 7.77E-01 | 23.27   | 9.09  | 1.05E-02 | 25.60  | 35.71 | 4.73E-01 |
| cg09637363 | 21.37  | 6.95  | 2.10E-03 | 14.01  | 11.51 | 2.23E-01 | 35.49   | 12.77  | 5.45E-03 | 17.74   | 16.93 | 2.95E-01 | 16.20  | 16.83 | 3.36E-01 |
| cg07919901 | -44.59 | 14.50 | 2.10E-03 | -51.35 | 16.03 | 1.36E-03 | -3.33   | 108.34 | 9.75E-01 | -38.35  | 82.83 | 6.43E-01 | -10.11 | 39.70 | 7.99E-01 |
| cg23690350 | 15.65  | 5.09  | 2.10E-03 | 20.99  | 7.90  | 7.92E-03 | 22.73   | 14.71  | 1.22E-01 | 13.97   | 9.35  | 1.35E-01 | 0.52   | 12.37 | 9.67E-01 |
| cg01070903 | 21.37  | 6.95  | 2.10E-03 | 18.85  | 11.44 | 9.95E-02 | 24.73   | 15.19  | 1.04E-01 | 11.73   | 14.89 | 4.31E-01 | 32.84  | 15.41 | 3.30E-02 |
| cg00898920 | -19.00 | 6.18  | 2.11E-03 | -24.43 | 8.90  | 6.04E-03 | -4.18   | 14.30  | 7.70E-01 | -6.04   | 18.04 | 7.38E-01 | -26.77 | 13.35 | 4.50E-02 |
| cg01140247 | -11.82 | 3.84  | 2.11E-03 | -12.58 | 6.32  | 4.65E-02 | -7.60   | 10.00  | 4.47E-01 | -13.78  | 7.06  | 5.09E-02 | -10.52 | 8.92  | 2.38E-01 |
| cg16383871 | 30.00  | 9.76  | 2.11E-03 | 32.49  | 15.89 | 4.08E-02 | 23.04   | 18.74  | 2.19E-01 | 29.90   | 23.17 | 1.97E-01 | 35.51  | 23.37 | 1.29E-01 |



|            |        |       |          |        |       |          |         |        |          |        |       |          |        |       |          |
|------------|--------|-------|----------|--------|-------|----------|---------|--------|----------|--------|-------|----------|--------|-------|----------|
| cg08802607 | 20.27  | 6.60  | 2.12E-03 | 32.99  | 7.87  | 2.77E-05 | 7.82    | 12.21  | 5.22E-01 | 12.55  | 15.91 | 4.30E-01 | 14.62  | 12.26 | 2.33E-01 |
| cg14091677 | 22.40  | 7.29  | 2.12E-03 | 7.50   | 19.81 | 7.05E-01 | 55.80   | 29.73  | 6.05E-02 | 22.32  | 8.43  | 8.07E-03 | 23.76  | 31.08 | 4.44E-01 |
| cg03275648 | -18.31 | 5.96  | 2.13E-03 | -13.11 | 15.16 | 3.87E-01 | -10.97  | 18.20  | 5.47E-01 | -21.13 | 7.46  | 4.61E-03 | -16.23 | 18.93 | 3.91E-01 |
| cg05102288 | 28.47  | 9.27  | 2.13E-03 | 45.06  | 21.23 | 3.38E-02 | -55.24  | 78.31  | 4.81E-01 | 28.64  | 10.88 | 8.49E-03 | -1.82  | 35.08 | 9.59E-01 |
| cg19480470 | -16.88 | 5.50  | 2.13E-03 | -4.52  | 12.45 | 7.16E-01 | 2.51    | 30.87  | 9.35E-01 | -19.27 | 6.58  | 3.39E-03 | -34.78 | 20.00 | 8.21E-02 |
| cg21731304 | -10.93 | 3.56  | 2.14E-03 | -22.83 | 9.09  | 1.20E-02 | -13.45  | 17.61  | 4.45E-01 | -8.88  | 4.22  | 3.53E-02 | -5.90  | 11.67 | 6.13E-01 |
| cg25439867 | -14.63 | 4.77  | 2.14E-03 | -16.62 | 9.07  | 6.68E-02 | 7.86    | 44.58  | 8.60E-01 | -16.29 | 6.17  | 8.29E-03 | -3.56  | 14.01 | 8.00E-01 |
| cg16891104 | 18.62  | 6.06  | 2.14E-03 | 13.74  | 8.96  | 1.25E-01 | 19.58   | 14.00  | 1.62E-01 | 37.44  | 16.06 | 1.97E-02 | 15.65  | 13.20 | 2.36E-01 |
| cg24150325 | -11.65 | 3.79  | 2.14E-03 | -11.89 | 9.70  | 2.20E-01 | -14.71  | 14.44  | 3.08E-01 | -11.68 | 4.55  | 1.03E-02 | -8.39  | 13.07 | 5.21E-01 |
| cg22994849 | 9.72   | 3.17  | 2.15E-03 | 18.83  | 7.18  | 8.70E-03 | 12.42   | 7.80   | 1.12E-01 | 5.99   | 4.22  | 1.56E-01 | 8.19   | 11.37 | 4.71E-01 |
| cg18361093 | -13.93 | 4.54  | 2.15E-03 | -14.33 | 5.85  | 1.43E-02 | -1.89   | 11.32  | 8.68E-01 | -4.26  | 15.37 | 7.82E-01 | -26.39 | 9.99  | 8.25E-03 |
| cg10333311 | 11.70  | 3.81  | 2.15E-03 | 17.09  | 5.98  | 4.29E-03 | 5.72    | 8.36   | 4.94E-01 | 2.37   | 10.89 | 8.27E-01 | 12.44  | 7.42  | 9.36E-02 |
| cg18861231 | -17.21 | 5.61  | 2.15E-03 | -17.21 | 10.59 | 1.04E-01 | -5.88   | 19.68  | 7.65E-01 | -16.75 | 7.81  | 3.19E-02 | -26.72 | 16.06 | 9.62E-02 |
| cg02328578 | -16.61 | 5.41  | 2.15E-03 | -36.08 | 12.96 | 5.35E-03 | -8.53   | 23.29  | 7.14E-01 | -11.97 | 6.54  | 6.73E-02 | -19.03 | 18.32 | 2.99E-01 |
| cg16496462 | 42.53  | 13.86 | 2.15E-03 | 52.47  | 20.95 | 1.23E-02 | 56.76   | 25.86  | 2.82E-02 | -10.59 | 35.85 | 7.68E-01 | 38.53  | 39.15 | 3.25E-01 |
| cg06545180 | -57.19 | 18.64 | 2.15E-03 | -81.48 | 34.45 | 1.80E-02 | -225.43 | 275.72 | 4.14E-01 | -53.84 | 23.80 | 2.37E-02 | 8.22   | 62.47 | 8.95E-01 |
| cg16759888 | 50.77  | 16.55 | 2.16E-03 | 40.49  | 39.73 | 3.08E-01 | -97.19  | 133.88 | 4.68E-01 | 51.22  | 19.09 | 7.31E-03 | 112.68 | 67.59 | 9.55E-02 |
| cg20489345 | -28.66 | 9.35  | 2.16E-03 | -8.15  | 23.96 | 7.34E-01 | -98.90  | 120.59 | 4.12E-01 | -34.39 | 10.63 | 1.21E-03 | -3.38  | 35.74 | 9.25E-01 |
| cg07198369 | -20.76 | 6.77  | 2.17E-03 | -7.43  | 18.56 | 6.89E-01 | -45.61  | 30.03  | 1.29E-01 | -20.82 | 7.87  | 8.18E-03 | -26.89 | 24.52 | 2.73E-01 |
| cg17863042 | -37.35 | 12.19 | 2.17E-03 | -50.91 | 37.23 | 1.71E-01 | -190.18 | 185.71 | 3.06E-01 | -30.68 | 13.56 | 2.37E-02 | -77.67 | 42.76 | 6.93E-02 |
| cg12289926 | 24.64  | 8.04  | 2.18E-03 | 17.62  | 13.15 | 1.80E-01 | 11.43   | 16.97  | 5.01E-01 | 25.02  | 17.12 | 1.44E-01 | 50.56  | 17.53 | 3.92E-03 |
| cg03809403 | 24.71  | 8.06  | 2.18E-03 | 31.43  | 19.18 | 1.01E-01 | -2.48   | 22.85  | 9.14E-01 | 26.64  | 10.27 | 9.44E-03 | 37.05  | 28.27 | 1.90E-01 |
| cg02865242 | 29.13  | 9.51  | 2.19E-03 | 29.39  | 18.09 | 1.04E-01 | 34.52   | 19.62  | 7.85E-02 | 26.38  | 15.70 | 9.30E-02 | 26.39  | 27.24 | 3.33E-01 |
| cg18814808 | -10.91 | 3.56  | 2.19E-03 | -15.41 | 7.56  | 4.14E-02 | -4.48   | 7.48   | 5.49E-01 | -13.08 | 5.43  | 1.61E-02 | -6.99  | 10.22 | 4.94E-01 |
| cg18156471 | -12.51 | 4.08  | 2.20E-03 | -14.31 | 8.17  | 7.97E-02 | -10.25  | 13.02  | 4.31E-01 | -11.69 | 5.66  | 3.88E-02 | -13.98 | 11.28 | 2.15E-01 |
| cg20502536 | -10.09 | 3.29  | 2.20E-03 | -15.06 | 5.29  | 4.44E-03 | -3.12   | 6.98   | 6.55E-01 | -8.63  | 6.60  | 1.91E-01 | -10.02 | 8.79  | 2.54E-01 |
| cg06234765 | -20.45 | 6.68  | 2.20E-03 | -25.02 | 18.52 | 1.77E-01 | 2.69    | 38.86  | 9.45E-01 | -22.53 | 7.64  | 3.21E-03 | -1.08  | 23.99 | 9.64E-01 |
| cg11224783 | -11.73 | 3.83  | 2.21E-03 | -18.14 | 8.27  | 2.83E-02 | -5.58   | 13.96  | 6.89E-01 | -10.62 | 5.05  | 3.56E-02 | -9.68  | 10.45 | 3.54E-01 |
| cg14426682 | 35.83  | 11.71 | 2.21E-03 | 56.69  | 23.88 | 1.76E-02 | 51.29   | 46.41  | 2.69E-01 | 24.16  | 15.05 | 1.09E-01 | 47.41  | 38.67 | 2.20E-01 |
| cg26168400 | -21.26 | 6.95  | 2.21E-03 | -24.16 | 28.42 | 3.95E-01 | -159.01 | 100.78 | 1.15E-01 | -21.34 | 7.45  | 4.20E-03 | -7.83  | 26.96 | 7.71E-01 |
| cg16095155 | -18.34 | 5.99  | 2.21E-03 | -22.08 | 10.61 | 3.74E-02 | -12.04  | 13.16  | 3.60E-01 | -20.85 | 11.72 | 7.54E-02 | -15.79 | 13.02 | 2.25E-01 |
| cg08924203 | -15.19 | 4.96  | 2.21E-03 | -10.40 | 7.30  | 1.54E-01 | -17.10  | 10.81  | 1.14E-01 | -34.94 | 19.48 | 7.29E-02 | -17.23 | 9.71  | 7.61E-02 |
| cg18282099 | -9.88  | 3.23  | 2.22E-03 | -5.47  | 4.77  | 2.51E-01 | -7.18   | 7.16   | 3.16E-01 | -16.90 | 9.33  | 7.01E-02 | -17.76 | 6.90  | 1.01E-02 |
| cg14468055 | -23.38 | 7.65  | 2.22E-03 | -31.60 | 13.43 | 1.86E-02 | 3.29    | 18.19  | 8.57E-01 | -30.68 | 14.79 | 3.80E-02 | -23.80 | 15.87 | 1.34E-01 |
| cg09391966 | -77.09 | 25.22 | 2.24E-03 | -92.95 | 33.20 | 5.12E-03 | -59.74  | 109.86 | 5.87E-01 | 53.41  | 85.68 | 5.33E-01 | -87.92 | 47.35 | 6.33E-02 |

|            |        |       |          |        |       |          |         |        |          |        |       |          |         |       |          |
|------------|--------|-------|----------|--------|-------|----------|---------|--------|----------|--------|-------|----------|---------|-------|----------|
| cg02843349 | 28.16  | 9.21  | 2.24E-03 | 29.28  | 13.62 | 3.15E-02 | 25.16   | 24.14  | 2.97E-01 | 22.87  | 29.08 | 4.32E-01 | 29.68   | 16.94 | 7.97E-02 |
| cg10452206 | -73.68 | 24.11 | 2.25E-03 | -66.25 | 31.93 | 3.80E-02 | -89.83  | 120.70 | 4.57E-01 | -19.73 | 70.11 | 7.78E-01 | -110.42 | 46.27 | 1.70E-02 |
| cg17910478 | 11.61  | 3.80  | 2.25E-03 | 6.25   | 4.89  | 2.01E-01 | 18.39   | 6.66   | 5.77E-03 | 19.33  | 8.34  | 2.05E-02 | 4.34    | 10.20 | 6.71E-01 |
| cg00709652 | -14.34 | 4.70  | 2.26E-03 | -19.05 | 7.46  | 1.07E-02 | -6.43   | 11.61  | 5.80E-01 | -8.32  | 9.06  | 3.59E-01 | -20.47  | 11.34 | 7.12E-02 |
| cg19244640 | 36.11  | 11.83 | 2.27E-03 | 12.82  | 36.94 | 7.29E-01 | -129.89 | 166.77 | 4.36E-01 | 42.32  | 12.99 | 1.13E-03 | 5.70    | 47.07 | 9.04E-01 |
| cg09987231 | 22.33  | 7.32  | 2.30E-03 | 28.92  | 12.30 | 1.87E-02 | 27.10   | 13.65  | 4.71E-02 | 16.98  | 15.44 | 2.71E-01 | 3.41    | 20.11 | 8.65E-01 |
| cg26475649 | 24.31  | 7.97  | 2.30E-03 | 22.67  | 10.26 | 2.71E-02 | 20.91   | 20.57  | 3.09E-01 | 46.20  | 38.46 | 2.30E-01 | 27.05   | 17.71 | 1.27E-01 |
| cg17619082 | -38.63 | 12.67 | 2.30E-03 | -1.88  | 26.64 | 9.44E-01 | -149.32 | 118.17 | 2.06E-01 | -47.15 | 13.20 | 3.55E-04 | -44.42  | 39.30 | 2.58E-01 |
| cg18781032 | -12.00 | 3.94  | 2.31E-03 | -17.86 | 7.69  | 2.01E-02 | 7.93    | 12.56  | 5.28E-01 | -12.61 | 5.28  | 1.68E-02 | -13.01  | 10.14 | 1.99E-01 |
| cg05280508 | -23.00 | 7.55  | 2.31E-03 | -23.41 | 21.78 | 2.83E-01 | -40.13  | 38.25  | 2.94E-01 | -21.98 | 8.58  | 1.04E-02 | -24.10  | 29.24 | 4.10E-01 |
| cg06800040 | -44.98 | 14.76 | 2.32E-03 | -68.60 | 22.95 | 2.80E-03 | 11.34   | 46.67  | 8.08E-01 | -50.78 | 25.10 | 4.31E-02 | -20.17  | 31.39 | 5.20E-01 |
| cg00713275 | 27.76  | 9.12  | 2.32E-03 | 30.00  | 21.78 | 1.68E-01 | 37.60   | 23.57  | 1.11E-01 | 24.45  | 11.58 | 3.48E-02 | 31.09   | 38.47 | 4.19E-01 |
| cg01688536 | 20.71  | 6.80  | 2.33E-03 | -1.71  | 21.68 | 9.37E-01 | 16.55   | 46.48  | 7.22E-01 | 24.33  | 7.66  | 1.48E-03 | 14.47   | 22.56 | 5.21E-01 |
| cg04011469 | -10.87 | 3.57  | 2.33E-03 | -18.95 | 8.02  | 1.82E-02 | -17.57  | 15.17  | 2.47E-01 | -7.65  | 4.48  | 8.78E-02 | -11.54  | 10.71 | 2.81E-01 |
| cg02295118 | 26.85  | 8.82  | 2.33E-03 | -10.16 | 24.58 | 6.79E-01 | 10.55   | 81.42  | 8.97E-01 | 33.76  | 9.92  | 6.64E-04 | 19.39   | 33.57 | 5.63E-01 |
| cg07464025 | 35.10  | 11.53 | 2.34E-03 | 2.77   | 22.77 | 9.03E-01 | 2.00    | 74.22  | 9.79E-01 | 45.10  | 13.56 | 8.85E-04 | 55.55   | 32.85 | 9.08E-02 |
| cg13881452 | 28.90  | 9.49  | 2.34E-03 | 37.75  | 22.17 | 8.86E-02 | 17.75   | 21.93  | 4.18E-01 | 27.14  | 12.92 | 3.56E-02 | 44.74   | 31.81 | 1.60E-01 |
| cg12661316 | 22.22  | 7.30  | 2.34E-03 | 22.03  | 8.13  | 6.76E-03 | 14.03   | 45.55  | 7.58E-01 | 44.45  | 53.85 | 4.09E-01 | 21.91   | 18.86 | 2.45E-01 |
| cg19438750 | -12.31 | 4.05  | 2.35E-03 | -13.42 | 7.27  | 6.49E-02 | -14.56  | 11.45  | 2.03E-01 | -15.40 | 6.45  | 1.70E-02 | -1.55   | 9.80  | 8.74E-01 |
| cg26236177 | 19.38  | 6.37  | 2.35E-03 | 15.44  | 9.18  | 9.26E-02 | 10.42   | 17.97  | 5.62E-01 | 59.89  | 30.65 | 5.07E-02 | 23.03   | 10.78 | 3.26E-02 |
| cg06799248 | 28.96  | 9.52  | 2.35E-03 | 16.06  | 20.43 | 4.32E-01 | 21.73   | 39.70  | 5.84E-01 | 27.45  | 11.84 | 2.04E-02 | 82.52   | 34.03 | 1.53E-02 |
| cg05627029 | -18.47 | 6.07  | 2.36E-03 | -16.79 | 17.47 | 3.37E-01 | -18.74  | 64.28  | 7.71E-01 | -19.06 | 6.74  | 4.67E-03 | -13.63  | 25.18 | 5.88E-01 |
| cg09637367 | 26.68  | 8.77  | 2.36E-03 | 40.44  | 16.20 | 1.26E-02 | 27.51   | 32.15  | 3.92E-01 | 22.75  | 12.56 | 7.01E-02 | 11.60   | 23.06 | 6.15E-01 |
| cg09390792 | 24.10  | 7.93  | 2.36E-03 | 22.13  | 17.12 | 1.96E-01 | 8.33    | 45.13  | 8.54E-01 | 25.51  | 9.68  | 8.42E-03 | 23.62   | 27.21 | 3.85E-01 |
| cg09767602 | 21.91  | 7.21  | 2.37E-03 | 45.03  | 25.71 | 7.99E-02 | 16.29   | 24.38  | 5.04E-01 | 24.46  | 8.76  | 5.25E-03 | 2.46    | 18.21 | 8.93E-01 |
| cg18857618 | -12.85 | 4.23  | 2.38E-03 | -24.35 | 11.29 | 3.10E-02 | -17.97  | 18.74  | 3.37E-01 | -8.99  | 5.08  | 7.69E-02 | -19.67  | 12.39 | 1.12E-01 |
| cg14520424 | 18.07  | 5.95  | 2.39E-03 | 29.37  | 23.69 | 2.15E-01 | 142.82  | 107.11 | 1.82E-01 | 15.88  | 6.38  | 1.28E-02 | 30.73   | 23.56 | 1.92E-01 |
| cg18335796 | 15.63  | 5.15  | 2.39E-03 | 20.03  | 7.47  | 7.32E-03 | 26.06   | 10.80  | 1.59E-02 | 9.72   | 12.09 | 4.21E-01 | 1.26    | 10.88 | 9.08E-01 |
| cg13860447 | -14.27 | 4.70  | 2.39E-03 | -12.75 | 10.04 | 2.04E-01 | -13.53  | 21.45  | 5.28E-01 | -12.48 | 5.95  | 3.58E-02 | -27.77  | 14.20 | 5.05E-02 |
| cg02821464 | -17.83 | 5.87  | 2.39E-03 | -23.02 | 9.78  | 1.86E-02 | -10.62  | 12.59  | 3.99E-01 | -26.15 | 13.50 | 5.27E-02 | -9.78   | 12.18 | 4.22E-01 |
| cg17692702 | 18.04  | 5.94  | 2.41E-03 | 18.20  | 13.32 | 1.72E-01 | 18.14   | 14.06  | 1.97E-01 | 14.05  | 8.35  | 9.23E-02 | 35.27   | 17.54 | 4.44E-02 |
| cg11687406 | 59.51  | 19.61 | 2.41E-03 | 37.04  | 44.57 | 4.06E-01 | -133.53 | 193.87 | 4.91E-01 | 66.24  | 23.19 | 4.29E-03 | 78.04   | 68.70 | 2.56E-01 |
| cg20164479 | -14.49 | 4.78  | 2.41E-03 | -27.51 | 11.89 | 2.06E-02 | 3.97    | 21.74  | 8.55E-01 | -12.76 | 5.86  | 2.94E-02 | -13.99  | 13.45 | 2.98E-01 |
| cg01667946 | 32.63  | 10.75 | 2.41E-03 | 58.65  | 27.03 | 3.00E-02 | -2.30   | 75.18  | 9.76E-01 | 29.98  | 12.62 | 1.76E-02 | 17.12   | 34.80 | 6.23E-01 |
| cg26441877 | 9.49   | 3.13  | 2.41E-03 | 8.03   | 4.61  | 8.15E-02 | 8.43    | 6.30   | 1.81E-01 | 15.86  | 8.85  | 7.31E-02 | 10.35   | 7.65  | 1.76E-01 |

|            |        |       |          |        |       |          |        |        |          |        |       |          |        |       |          |
|------------|--------|-------|----------|--------|-------|----------|--------|--------|----------|--------|-------|----------|--------|-------|----------|
| cg26564040 | 19.24  | 6.34  | 2.42E-03 | 18.88  | 14.72 | 2.00E-01 | 7.86   | 71.40  | 9.12E-01 | 19.76  | 7.39  | 7.52E-03 | 16.07  | 23.91 | 5.02E-01 |
| cg05746617 | 28.51  | 9.40  | 2.42E-03 | 32.08  | 16.69 | 5.45E-02 | 24.01  | 15.89  | 1.31E-01 | 32.52  | 22.88 | 1.55E-01 | 27.08  | 23.19 | 2.43E-01 |
| cg10135753 | 20.06  | 6.62  | 2.43E-03 | 15.82  | 9.07  | 8.13E-02 | 35.35  | 15.22  | 2.02E-02 | 12.31  | 22.88 | 5.91E-01 | 20.16  | 14.97 | 1.78E-01 |
| cg19869698 | 23.46  | 7.74  | 2.43E-03 | 22.84  | 12.24 | 6.21E-02 | 28.70  | 14.10  | 4.18E-02 | 30.48  | 19.31 | 1.14E-01 | 5.76   | 20.76 | 7.81E-01 |
| cg16124562 | 14.12  | 4.66  | 2.43E-03 | 19.36  | 9.63  | 4.45E-02 | 6.71   | 16.38  | 6.82E-01 | 15.00  | 6.11  | 1.41E-02 | 3.31   | 14.34 | 8.18E-01 |
| cg20744304 | 37.13  | 12.25 | 2.43E-03 | 23.02  | 25.70 | 3.70E-01 | -97.78 | 174.05 | 5.74E-01 | 41.12  | 14.88 | 5.72E-03 | 50.01  | 40.63 | 2.18E-01 |
| cg04920214 | -18.56 | 6.12  | 2.43E-03 | -28.78 | 17.33 | 9.68E-02 | -20.31 | 37.96  | 5.93E-01 | -17.72 | 6.91  | 1.03E-02 | -8.15  | 24.29 | 7.37E-01 |
| cg22267908 | 21.41  | 7.06  | 2.43E-03 | 18.94  | 16.02 | 2.37E-01 | -29.16 | 60.50  | 6.30E-01 | 24.47  | 8.34  | 3.34E-03 | 7.72   | 25.78 | 7.65E-01 |
| cg01991934 | 19.54  | 6.45  | 2.43E-03 | 36.40  | 15.74 | 2.08E-02 | 22.53  | 18.20  | 2.16E-01 | 12.92  | 8.48  | 1.28E-01 | 24.36  | 17.93 | 1.74E-01 |
| cg22521310 | 32.20  | 10.62 | 2.43E-03 | 37.94  | 16.95 | 2.52E-02 | -0.42  | 27.47  | 9.88E-01 | 24.83  | 25.90 | 3.38E-01 | 45.52  | 19.73 | 2.11E-02 |
| cg16714055 | 31.92  | 10.53 | 2.44E-03 | 75.39  | 29.82 | 1.15E-02 | 45.17  | 65.81  | 4.92E-01 | 23.87  | 12.72 | 6.06E-02 | 30.45  | 25.99 | 2.41E-01 |
| cg24952102 | -23.35 | 7.70  | 2.44E-03 | -27.39 | 14.35 | 5.62E-02 | -17.18 | 20.39  | 4.00E-01 | -24.05 | 11.55 | 3.73E-02 | -18.55 | 21.88 | 3.97E-01 |
| cg13139843 | -11.43 | 3.77  | 2.44E-03 | -13.39 | 7.80  | 8.57E-02 | -6.15  | 15.39  | 6.89E-01 | -11.22 | 5.01  | 2.51E-02 | -11.29 | 10.15 | 2.66E-01 |
| cg25264268 | 7.37   | 2.43  | 2.45E-03 | 7.71   | 3.19  | 1.58E-02 | 12.22  | 4.99   | 1.43E-02 | 2.52   | 10.74 | 8.15E-01 | -1.09  | 6.75  | 8.72E-01 |
| cg08650784 | -12.82 | 4.23  | 2.45E-03 | -17.35 | 6.38  | 6.51E-03 | -7.34  | 9.28   | 4.29E-01 | -0.37  | 10.86 | 9.73E-01 | -18.03 | 9.48  | 5.71E-02 |
| cg11725581 | 6.45   | 2.13  | 2.45E-03 | 5.18   | 2.97  | 8.17E-02 | 7.62   | 4.70   | 1.05E-01 | 8.08   | 4.64  | 8.16E-02 | 7.46   | 7.98  | 3.50E-01 |
| cg01328473 | 12.20  | 4.03  | 2.45E-03 | 13.99  | 5.75  | 1.50E-02 | 19.28  | 9.22   | 3.64E-02 | 11.57  | 12.03 | 3.36E-01 | 1.72   | 8.88  | 8.46E-01 |
| cg00453808 | 27.36  | 9.03  | 2.46E-03 | 39.77  | 15.92 | 1.25E-02 | 10.76  | 17.12  | 5.29E-01 | 14.09  | 18.47 | 4.45E-01 | 48.63  | 21.40 | 2.31E-02 |
| cg04109092 | 11.41  | 3.77  | 2.46E-03 | 10.79  | 5.18  | 3.75E-02 | 14.69  | 8.02   | 6.68E-02 | -7.20  | 13.23 | 5.86E-01 | 17.92  | 9.13  | 4.97E-02 |
| cg12092716 | -12.52 | 4.14  | 2.47E-03 | -15.55 | 5.77  | 7.08E-03 | -16.00 | 9.15   | 8.05E-02 | -7.31  | 15.31 | 6.33E-01 | -3.53  | 9.03  | 6.96E-01 |
| cg08524015 | 37.98  | 12.55 | 2.48E-03 | 41.93  | 18.15 | 2.09E-02 | 42.09  | 34.27  | 2.19E-01 | 34.15  | 32.98 | 3.00E-01 | 30.21  | 25.44 | 2.35E-01 |
| cg05062489 | -13.69 | 4.52  | 2.48E-03 | -17.32 | 7.44  | 1.99E-02 | -11.08 | 9.90   | 2.63E-01 | -11.40 | 10.86 | 2.94E-01 | -12.07 | 9.08  | 1.84E-01 |
| cg11616271 | 33.83  | 11.18 | 2.48E-03 | 36.71  | 27.51 | 1.82E-01 | 25.90  | 114.34 | 8.21E-01 | 37.64  | 12.94 | 3.62E-03 | -7.34  | 39.79 | 8.54E-01 |
| cg04354002 | 3.14   | 1.04  | 2.48E-03 | 3.13   | 1.43  | 2.80E-02 | 2.15   | 2.29   | 3.48E-01 | 1.35   | 3.48  | 6.99E-01 | 5.25   | 2.48  | 3.44E-02 |
| cg22305209 | 15.46  | 5.11  | 2.48E-03 | 11.66  | 7.42  | 1.16E-01 | 18.52  | 11.39  | 1.04E-01 | 3.12   | 18.47 | 8.66E-01 | 24.07  | 10.27 | 1.90E-02 |
| cg01522095 | -22.16 | 7.32  | 2.48E-03 | -8.77  | 18.39 | 6.33E-01 | 28.23  | 49.57  | 5.69E-01 | -27.42 | 8.43  | 1.15E-03 | -10.84 | 28.57 | 7.04E-01 |
| cg19539664 | -21.91 | 7.24  | 2.49E-03 | -4.55  | 19.37 | 8.14E-01 | -58.08 | 40.50  | 1.52E-01 | -27.40 | 7.52  | 2.70E-04 | -2.06  | 19.26 | 9.15E-01 |
| cg10320997 | -13.31 | 4.40  | 2.49E-03 | -11.68 | 9.06  | 1.97E-01 | -15.29 | 13.36  | 2.52E-01 | -14.48 | 6.06  | 1.68E-02 | -9.79  | 12.31 | 4.27E-01 |
| cg19594666 | 9.71   | 3.21  | 2.49E-03 | 6.88   | 4.59  | 1.33E-01 | 16.98  | 6.84   | 1.30E-02 | 2.38   | 9.70  | 8.07E-01 | 12.96  | 7.57  | 8.69E-02 |
| cg06934654 | -18.50 | 6.12  | 2.50E-03 | -19.26 | 10.58 | 6.88E-02 | -7.22  | 23.86  | 7.62E-01 | -17.43 | 10.81 | 1.07E-01 | -21.50 | 11.58 | 6.34E-02 |
| cg16190575 | 25.30  | 8.37  | 2.50E-03 | 6.68   | 17.46 | 7.02E-01 | 39.15  | 19.02  | 3.96E-02 | 22.68  | 12.58 | 7.13E-02 | 45.82  | 22.86 | 4.50E-02 |
| cg04560456 | 18.72  | 6.19  | 2.50E-03 | 17.65  | 8.40  | 3.56E-02 | 31.14  | 17.44  | 7.42E-02 | 24.66  | 34.99 | 4.81E-01 | 14.80  | 11.33 | 1.91E-01 |
| cg20644426 | 25.45  | 8.42  | 2.50E-03 | 44.36  | 22.50 | 4.86E-02 | 65.15  | 80.70  | 4.19E-01 | 23.87  | 9.61  | 1.30E-02 | 2.63   | 29.46 | 9.29E-01 |
| cg01537471 | 22.77  | 7.53  | 2.51E-03 | 1.35   | 20.71 | 9.48E-01 | 30.93  | 51.53  | 5.48E-01 | 25.44  | 8.69  | 3.43E-03 | 29.64  | 24.41 | 2.25E-01 |
| cg08900511 | 21.06  | 6.97  | 2.51E-03 | 12.61  | 10.83 | 2.44E-01 | 25.04  | 13.45  | 6.25E-02 | 32.44  | 16.22 | 4.54E-02 | 23.47  | 19.08 | 2.19E-01 |

|            |        |       |          |        |       |          |         |        |          |         |       |          |        |       |          |
|------------|--------|-------|----------|--------|-------|----------|---------|--------|----------|---------|-------|----------|--------|-------|----------|
| cg08942191 | -11.66 | 3.86  | 2.51E-03 | -13.14 | 10.16 | 1.96E-01 | -5.08   | 18.44  | 7.83E-01 | -12.04  | 4.60  | 8.91E-03 | -9.90  | 11.65 | 3.95E-01 |
| cg16907934 | 11.12  | 3.68  | 2.52E-03 | 10.84  | 5.60  | 5.31E-02 | 19.19   | 10.28  | 6.20E-02 | 13.76   | 6.69  | 3.98E-02 | -1.29  | 9.93  | 8.97E-01 |
| cg23053624 | -26.20 | 8.67  | 2.52E-03 | -35.30 | 23.22 | 1.28E-01 | -0.73   | 71.69  | 9.92E-01 | -25.32  | 9.88  | 1.04E-02 | -23.28 | 31.44 | 4.59E-01 |
| cg16573701 | 48.70  | 16.12 | 2.52E-03 | 46.01  | 22.06 | 3.70E-02 | 107.89  | 42.73  | 1.16E-02 | 29.33   | 46.05 | 5.24E-01 | 25.75  | 35.97 | 4.74E-01 |
| cg00167710 | -52.23 | 17.29 | 2.52E-03 | 0.74   | 55.05 | 9.89E-01 | -148.44 | 224.30 | 5.08E-01 | -60.77  | 19.04 | 1.42E-03 | -18.46 | 64.98 | 7.76E-01 |
| cg08881067 | -66.19 | 21.92 | 2.53E-03 | -71.70 | 25.69 | 5.25E-03 | 35.59   | 111.67 | 7.50E-01 | -126.44 | 94.15 | 1.79E-01 | -47.45 | 51.78 | 3.60E-01 |
| cg19774694 | 28.02  | 9.28  | 2.53E-03 | 23.08  | 11.28 | 4.07E-02 | -10.12  | 30.52  | 7.40E-01 | 65.30   | 41.40 | 1.15E-01 | 40.74  | 15.06 | 6.82E-03 |
| cg20768445 | -14.49 | 4.80  | 2.53E-03 | -20.93 | 12.94 | 1.06E-01 | 7.43    | 20.10  | 7.12E-01 | -13.28  | 5.66  | 1.89E-02 | -28.60 | 16.27 | 7.88E-02 |
| cg05989533 | -7.40  | 2.45  | 2.54E-03 | -9.94  | 3.40  | 3.44E-03 | -8.95   | 5.66   | 1.14E-01 | -9.66   | 8.88  | 2.77E-01 | 0.44   | 5.15  | 9.32E-01 |
| cg17928799 | -41.37 | 13.70 | 2.54E-03 | -48.51 | 25.23 | 5.45E-02 | -10.51  | 67.69  | 8.77E-01 | -36.11  | 18.82 | 5.51E-02 | -55.91 | 37.46 | 1.36E-01 |
| cg15543551 | 10.76  | 3.56  | 2.54E-03 | 16.65  | 5.44  | 2.22E-03 | 7.10    | 9.78   | 4.67E-01 | 9.86    | 8.25  | 2.32E-01 | 3.31   | 7.11  | 6.41E-01 |
| cg21751540 | 14.36  | 4.76  | 2.54E-03 | 14.87  | 8.49  | 7.97E-02 | 14.90   | 10.45  | 1.54E-01 | 5.11    | 8.82  | 5.63E-01 | 27.23  | 10.98 | 1.31E-02 |
| cg09395844 | -17.70 | 5.87  | 2.55E-03 | -30.19 | 10.56 | 4.23E-03 | -11.39  | 13.58  | 4.02E-01 | -11.00  | 10.89 | 3.13E-01 | -14.27 | 12.66 | 2.60E-01 |
| cg16258017 | 36.09  | 11.96 | 2.55E-03 | 56.73  | 41.51 | 1.72E-01 | 262.87  | 172.61 | 1.28E-01 | 35.57   | 13.05 | 6.43E-03 | 3.26   | 44.55 | 9.42E-01 |
| cg24742092 | 18.36  | 6.09  | 2.56E-03 | 22.29  | 14.22 | 1.17E-01 | 27.88   | 23.60  | 2.37E-01 | 13.14   | 8.38  | 1.17E-01 | 24.67  | 12.91 | 5.59E-02 |
| cg27470486 | -16.17 | 5.36  | 2.56E-03 | -15.13 | 8.28  | 6.76E-02 | -9.69   | 11.50  | 4.00E-01 | -14.17  | 11.66 | 2.24E-01 | -30.97 | 13.71 | 2.39E-02 |
| cg25979180 | -20.52 | 6.80  | 2.56E-03 | -23.98 | 14.59 | 1.00E-01 | 8.53    | 35.60  | 8.11E-01 | -23.79  | 8.44  | 4.81E-03 | -1.48  | 22.04 | 9.46E-01 |
| cg20278382 | 29.57  | 9.81  | 2.56E-03 | 23.20  | 18.80 | 2.17E-01 | 6.23    | 59.54  | 9.17E-01 | 33.95   | 12.60 | 7.03E-03 | 26.56  | 31.82 | 4.04E-01 |
| cg16872172 | 25.91  | 8.59  | 2.56E-03 | 36.93  | 27.74 | 1.83E-01 | 27.29   | 139.89 | 8.45E-01 | 24.51   | 9.36  | 8.87E-03 | 27.86  | 35.39 | 4.31E-01 |
| cg17142743 | 20.65  | 6.85  | 2.56E-03 | 3.36   | 19.64 | 8.64E-01 | 31.91   | 64.81  | 6.22E-01 | 23.37   | 7.78  | 2.68E-03 | 19.25  | 22.43 | 3.91E-01 |
| cg19896198 | -42.28 | 14.02 | 2.56E-03 | -23.98 | 17.25 | 1.65E-01 | -67.68  | 42.86  | 1.14E-01 | -113.18 | 58.36 | 5.25E-02 | -54.71 | 25.29 | 3.05E-02 |
| cg05938285 | 39.34  | 13.04 | 2.57E-03 | 40.97  | 15.93 | 1.01E-02 | 44.89   | 50.42  | 3.73E-01 | -10.35  | 62.12 | 8.68E-01 | 42.66  | 27.90 | 1.26E-01 |
| cg15052217 | 26.16  | 8.68  | 2.57E-03 | 13.49  | 20.50 | 5.10E-01 | 45.48   | 20.96  | 3.00E-02 | 27.34   | 11.66 | 1.91E-02 | 8.46   | 28.04 | 7.63E-01 |
| cg16845880 | -13.26 | 4.40  | 2.58E-03 | -22.45 | 8.60  | 9.02E-03 | -4.99   | 16.12  | 7.57E-01 | -9.07   | 5.89  | 1.24E-01 | -18.42 | 13.51 | 1.73E-01 |
| cg03021192 | 51.11  | 16.97 | 2.59E-03 | 56.52  | 49.21 | 2.51E-01 | -18.97  | 135.75 | 8.89E-01 | 57.31   | 19.16 | 2.78E-03 | -3.20  | 59.54 | 9.57E-01 |
| cg23843505 | -14.57 | 4.84  | 2.60E-03 | -15.63 | 6.81  | 2.17E-02 | -23.17  | 10.65  | 2.95E-02 | -11.40  | 17.30 | 5.10E-01 | -4.74  | 10.56 | 6.53E-01 |
| cg09896120 | 48.66  | 16.16 | 2.60E-03 | 43.44  | 19.02 | 2.24E-02 | 54.94   | 91.25  | 5.47E-01 | 53.98   | 55.27 | 3.29E-01 | 67.99  | 40.23 | 9.11E-02 |
| cg04742977 | 14.27  | 4.74  | 2.61E-03 | 18.44  | 7.68  | 1.63E-02 | 6.07    | 9.49   | 5.22E-01 | 15.07   | 11.56 | 1.92E-01 | 15.83  | 10.54 | 1.33E-01 |
| cg25475843 | -15.91 | 5.29  | 2.61E-03 | -15.36 | 11.81 | 1.93E-01 | -15.98  | 20.71  | 4.40E-01 | -14.27  | 6.49  | 2.78E-02 | -32.89 | 19.90 | 9.83E-02 |
| cg18151134 | -14.59 | 4.85  | 2.61E-03 | -11.14 | 13.05 | 3.93E-01 | 2.10    | 24.16  | 9.31E-01 | -14.43  | 5.56  | 9.38E-03 | -35.45 | 19.65 | 7.12E-02 |
| cg11891735 | 41.21  | 13.69 | 2.61E-03 | 52.25  | 20.00 | 8.97E-03 | 46.21   | 28.66  | 1.07E-01 | 34.31   | 41.59 | 4.09E-01 | 12.57  | 31.05 | 6.85E-01 |
| cg26338757 | -16.22 | 5.39  | 2.62E-03 | -14.94 | 7.23  | 3.88E-02 | 1.55    | 12.58  | 9.02E-01 | -29.05  | 10.57 | 6.00E-03 | -19.02 | 11.02 | 8.43E-02 |
| cg08591668 | 9.66   | 3.21  | 2.62E-03 | 3.09   | 5.53  | 5.76E-01 | 17.85   | 7.62   | 1.92E-02 | 11.60   | 5.18  | 2.50E-02 | 9.86   | 10.15 | 3.32E-01 |
| cg06520369 | 22.77  | 7.57  | 2.62E-03 | 41.81  | 23.87 | 7.99E-02 | 34.72   | 26.34  | 1.87E-01 | 18.21   | 8.61  | 3.43E-02 | 37.10  | 36.25 | 3.06E-01 |
| cg12636369 | 16.40  | 5.45  | 2.62E-03 | 21.53  | 9.00  | 1.67E-02 | 12.88   | 13.44  | 3.38E-01 | 10.84   | 11.78 | 3.57E-01 | 15.97  | 10.81 | 1.40E-01 |

|            |        |       |          |        |       |          |         |        |          |         |       |          |        |       |          |
|------------|--------|-------|----------|--------|-------|----------|---------|--------|----------|---------|-------|----------|--------|-------|----------|
| cg09412707 | -13.63 | 4.53  | 2.63E-03 | -17.28 | 11.15 | 1.21E-01 | -13.31  | 12.69  | 2.94E-01 | -11.85  | 5.97  | 4.70E-02 | -17.15 | 12.52 | 1.71E-01 |
| cg22449302 | 40.16  | 13.35 | 2.63E-03 | 9.80   | 41.29 | 8.12E-01 | 187.60  | 179.16 | 2.95E-01 | 44.38   | 14.83 | 2.77E-03 | 26.80  | 47.33 | 5.71E-01 |
| cg18192917 | 29.40  | 9.78  | 2.65E-03 | 51.56  | 18.98 | 6.59E-03 | 24.68   | 19.18  | 1.98E-01 | 15.51   | 18.07 | 3.91E-01 | 26.14  | 23.01 | 2.56E-01 |
| cg17125990 | 17.82  | 5.93  | 2.66E-03 | 20.19  | 8.22  | 1.41E-02 | 22.43   | 15.55  | 1.49E-01 | 20.57   | 14.17 | 1.47E-01 | 2.84   | 14.86 | 8.49E-01 |
| cg26221971 | -60.44 | 20.12 | 2.67E-03 | -47.83 | 27.14 | 7.80E-02 | -68.84  | 74.38  | 3.55E-01 | -31.74  | 59.27 | 5.92E-01 | -97.22 | 39.33 | 1.34E-02 |
| cg14742341 | 14.39  | 4.79  | 2.67E-03 | 7.54   | 8.31  | 3.64E-01 | 21.37   | 10.92  | 5.02E-02 | 14.82   | 7.64  | 5.25E-02 | 23.79  | 16.78 | 1.56E-01 |
| cg03342215 | -56.29 | 18.74 | 2.67E-03 | -65.25 | 28.54 | 2.22E-02 | 23.11   | 75.01  | 7.58E-01 | -82.68  | 41.37 | 4.56E-02 | -41.92 | 34.17 | 2.20E-01 |
| cg00996315 | -13.15 | 4.38  | 2.68E-03 | -13.02 | 6.80  | 5.55E-02 | -13.00  | 8.84   | 1.41E-01 | -11.17  | 14.13 | 4.29E-01 | -14.32 | 8.88  | 1.07E-01 |
| cg09695261 | -90.66 | 30.19 | 2.68E-03 | -92.50 | 43.98 | 3.54E-02 | 190.37  | 250.86 | 4.48E-01 | -112.09 | 52.53 | 3.28E-02 | -69.55 | 70.43 | 3.23E-01 |
| cg13587180 | -5.72  | 1.90  | 2.68E-03 | -5.80  | 2.79  | 3.75E-02 | -5.52   | 3.79   | 1.45E-01 | -2.83   | 7.54  | 7.07E-01 | -6.63  | 4.10  | 1.06E-01 |
| cg27519016 | 17.71  | 5.90  | 2.68E-03 | 24.57  | 12.34 | 4.65E-02 | 34.49   | 14.49  | 1.73E-02 | 10.53   | 8.30  | 2.05E-01 | 10.57  | 18.59 | 5.70E-01 |
| cg10233133 | 34.41  | 11.46 | 2.68E-03 | 34.83  | 15.25 | 2.24E-02 | 39.69   | 39.68  | 3.17E-01 | 29.16   | 37.57 | 4.38E-01 | 33.69  | 22.55 | 1.35E-01 |
| cg07592723 | 61.17  | 20.38 | 2.69E-03 | 75.03  | 25.19 | 2.90E-03 | -52.89  | 134.56 | 6.94E-01 | 40.45   | 68.14 | 5.53E-01 | 41.43  | 42.21 | 3.26E-01 |
| cg14582400 | 17.71  | 5.90  | 2.69E-03 | 16.09  | 8.02  | 4.48E-02 | 4.36    | 16.71  | 7.94E-01 | 11.24   | 22.62 | 6.19E-01 | 28.96  | 11.45 | 1.15E-02 |
| cg04792024 | 28.13  | 9.37  | 2.69E-03 | 36.32  | 20.23 | 7.26E-02 | 23.55   | 17.13  | 1.69E-01 | 14.77   | 15.74 | 3.48E-01 | 61.35  | 25.90 | 1.78E-02 |
| cg19659215 | -9.83  | 3.28  | 2.69E-03 | -4.98  | 6.01  | 4.07E-01 | -10.80  | 9.51   | 2.56E-01 | -12.05  | 5.07  | 1.74E-02 | -12.23 | 8.04  | 1.28E-01 |
| cg16423738 | -10.63 | 3.54  | 2.69E-03 | -15.03 | 7.75  | 5.26E-02 | -12.71  | 10.32  | 2.18E-01 | -10.31  | 4.76  | 3.03E-02 | -2.36  | 10.29 | 8.19E-01 |
| cg21735093 | 24.62  | 8.21  | 2.70E-03 | 42.64  | 27.04 | 1.15E-01 | -0.77   | 111.44 | 9.94E-01 | 20.17   | 8.93  | 2.38E-02 | 63.56  | 34.23 | 6.33E-02 |
| cg25450333 | -35.63 | 11.88 | 2.70E-03 | -29.23 | 20.07 | 1.45E-01 | -46.89  | 17.39  | 7.00E-03 | 13.64   | 49.79 | 7.84E-01 | -34.00 | 33.44 | 3.09E-01 |
| cg16672562 | 5.06   | 1.69  | 2.70E-03 | 6.54   | 2.40  | 6.50E-03 | 3.18    | 3.43   | 3.54E-01 | 2.40    | 5.26  | 6.48E-01 | 5.03   | 4.17  | 2.27E-01 |
| cg25339966 | 24.32  | 8.11  | 2.70E-03 | 43.93  | 13.14 | 8.25E-04 | 9.97    | 16.37  | 5.42E-01 | 17.16   | 12.71 | 1.77E-01 | 18.00  | 23.14 | 4.37E-01 |
| cg23049079 | 23.59  | 7.87  | 2.71E-03 | 27.30  | 13.67 | 4.58E-02 | 55.35   | 23.20  | 1.70E-02 | 15.88   | 11.32 | 1.60E-01 | 7.25   | 29.60 | 8.06E-01 |
| cg25120705 | -28.45 | 9.49  | 2.71E-03 | -34.55 | 15.27 | 2.37E-02 | -6.66   | 23.71  | 7.79E-01 | -29.80  | 21.31 | 1.62E-01 | -31.87 | 18.78 | 8.97E-02 |
| cg03724229 | 8.10   | 2.70  | 2.72E-03 | 8.18   | 4.27  | 5.55E-02 | 14.60   | 6.36   | 2.17E-02 | 5.16    | 4.75  | 2.77E-01 | 5.46   | 8.75  | 5.33E-01 |
| cg15640062 | 54.22  | 18.09 | 2.72E-03 | 57.26  | 22.40 | 1.06E-02 | 97.49   | 88.83  | 2.72E-01 | 7.79    | 83.11 | 9.25E-01 | 48.13  | 35.53 | 1.76E-01 |
| cg11831988 | 13.39  | 4.47  | 2.72E-03 | 13.51  | 7.79  | 8.28E-02 | 7.44    | 16.01  | 6.42E-01 | 10.26   | 6.53  | 1.16E-01 | 28.50  | 12.64 | 2.41E-02 |
| cg20585530 | 21.63  | 7.22  | 2.73E-03 | 47.06  | 18.13 | 9.42E-03 | 30.81   | 20.65  | 1.36E-01 | 17.40   | 10.14 | 8.62E-02 | 9.28   | 14.32 | 5.17E-01 |
| cg02281662 | -76.31 | 25.47 | 2.74E-03 | -75.72 | 31.75 | 1.71E-02 | 51.35   | 130.90 | 6.95E-01 | -151.07 | 64.58 | 1.93E-02 | -36.88 | 63.14 | 5.59E-01 |
| cg00986119 | 24.56  | 8.20  | 2.74E-03 | 33.20  | 16.04 | 3.85E-02 | 16.85   | 17.80  | 3.44E-01 | 26.61   | 18.29 | 1.46E-01 | 21.38  | 14.36 | 1.37E-01 |
| cg00590324 | 24.86  | 8.30  | 2.75E-03 | 46.63  | 21.18 | 2.77E-02 | 15.28   | 30.03  | 6.11E-01 | 19.68   | 12.98 | 1.30E-01 | 23.50  | 13.81 | 8.89E-02 |
| cg26265070 | 38.14  | 12.74 | 2.75E-03 | -9.57  | 41.93 | 8.19E-01 | 110.72  | 163.99 | 5.00E-01 | 42.05   | 13.89 | 2.48E-03 | 49.13  | 51.34 | 3.39E-01 |
| cg13785473 | 27.00  | 9.02  | 2.75E-03 | 25.34  | 11.56 | 2.84E-02 | 33.12   | 21.57  | 1.25E-01 | 38.56   | 32.08 | 2.29E-01 | 19.92  | 24.32 | 4.13E-01 |
| cg25412230 | -15.78 | 5.27  | 2.77E-03 | -17.10 | 10.42 | 1.01E-01 | -29.51  | 17.52  | 9.20E-02 | -15.09  | 7.28  | 3.82E-02 | -6.33  | 14.67 | 6.66E-01 |
| cg01046309 | 28.17  | 9.41  | 2.77E-03 | 11.34  | 43.32 | 7.94E-01 | -134.40 | 176.48 | 4.46E-01 | 28.94   | 10.02 | 3.88E-03 | 36.71  | 36.19 | 3.10E-01 |
| cg27199976 | -14.11 | 4.72  | 2.77E-03 | -11.26 | 6.60  | 8.81E-02 | -18.14  | 11.32  | 1.09E-01 | -7.18   | 17.36 | 6.79E-01 | -19.37 | 9.59  | 4.34E-02 |

|               |        |       |          |        |       |          |         |        |          |        |       |          |        |       |          |
|---------------|--------|-------|----------|--------|-------|----------|---------|--------|----------|--------|-------|----------|--------|-------|----------|
| cg00170536    | -27.38 | 9.15  | 2.77E-03 | -9.49  | 29.22 | 7.45E-01 | -3.11   | 125.30 | 9.80E-01 | -31.09 | 10.03 | 1.93E-03 | -8.43  | 36.32 | 8.16E-01 |
| cg07207682    | 41.29  | 13.80 | 2.77E-03 | 32.04  | 26.10 | 2.20E-01 | -111.96 | 97.00  | 2.48E-01 | 50.91  | 17.60 | 3.83E-03 | 38.69  | 47.23 | 4.13E-01 |
| cg01423964    | 46.45  | 15.53 | 2.78E-03 | 24.35  | 43.03 | 5.71E-01 | -100.99 | 152.88 | 5.09E-01 | 49.65  | 17.38 | 4.27E-03 | 76.77  | 62.96 | 2.23E-01 |
| cg17181362    | -10.66 | 3.56  | 2.78E-03 | -10.14 | 5.44  | 6.21E-02 | -7.45   | 9.42   | 4.29E-01 | -14.67 | 8.07  | 6.90E-02 | -10.24 | 7.41  | 1.67E-01 |
| cg15285436    | 6.17   | 2.06  | 2.78E-03 | 5.85   | 2.84  | 3.94E-02 | 9.30    | 5.04   | 6.49E-02 | 5.98   | 4.43  | 1.77E-01 | 2.61   | 6.90  | 7.05E-01 |
| cg06468978    | 18.20  | 6.09  | 2.78E-03 | 25.09  | 10.12 | 1.31E-02 | 9.44    | 11.45  | 4.10E-01 | 15.85  | 13.92 | 2.55E-01 | 20.81  | 15.00 | 1.65E-01 |
| cg12637676    | -10.86 | 3.63  | 2.78E-03 | -15.94 | 6.49  | 1.40E-02 | -4.90   | 8.28   | 5.53E-01 | -6.78  | 6.88  | 3.25E-01 | -14.08 | 7.82  | 7.19E-02 |
| cg25764464    | 48.32  | 16.16 | 2.79E-03 | 60.29  | 27.02 | 2.57E-02 | 67.08   | 49.30  | 1.74E-01 | 34.41  | 26.67 | 1.97E-01 | 41.26  | 39.46 | 2.96E-01 |
| ch.9.2503392R | -24.77 | 8.28  | 2.79E-03 | -21.29 | 12.82 | 9.68E-02 | -30.90  | 14.79  | 3.67E-02 | -41.56 | 41.81 | 3.20E-01 | -19.86 | 17.29 | 2.51E-01 |
| cg10192877    | 28.89  | 9.67  | 2.81E-03 | 25.72  | 15.72 | 1.02E-01 | 32.83   | 20.35  | 1.07E-01 | 26.08  | 21.13 | 2.17E-01 | 33.70  | 22.39 | 1.32E-01 |
| cg18231614    | 24.06  | 8.05  | 2.81E-03 | 43.30  | 15.61 | 5.53E-03 | 11.54   | 20.38  | 5.71E-01 | 19.73  | 13.11 | 1.32E-01 | 16.40  | 17.98 | 3.62E-01 |
| cg24128943    | 15.52  | 5.19  | 2.81E-03 | 8.30   | 14.55 | 5.68E-01 | 16.74   | 24.30  | 4.91E-01 | 16.68  | 5.93  | 4.91E-03 | 15.02  | 21.26 | 4.80E-01 |
| cg24498587    | 97.39  | 32.60 | 2.82E-03 | 104.11 | 46.50 | 2.52E-02 | 167.73  | 99.95  | 9.33E-02 | 63.47  | 92.44 | 4.92E-01 | 73.73  | 61.88 | 2.33E-01 |
| cg03134157    | 14.00  | 4.69  | 2.82E-03 | 27.04  | 10.50 | 1.00E-02 | 14.40   | 27.54  | 6.01E-01 | 12.42  | 5.93  | 3.63E-02 | 2.94   | 12.24 | 8.10E-01 |
| cg09425228    | -16.76 | 5.61  | 2.83E-03 | -19.26 | 17.68 | 2.76E-01 | -5.61   | 37.07  | 8.80E-01 | -15.29 | 6.20  | 1.37E-02 | -37.55 | 23.30 | 1.07E-01 |
| cg25142954    | -26.39 | 8.84  | 2.83E-03 | -26.63 | 10.98 | 1.53E-02 | -19.64  | 21.39  | 3.58E-01 | -17.09 | 35.71 | 6.32E-01 | -39.45 | 25.53 | 1.22E-01 |
| cg17841421    | 30.20  | 10.11 | 2.83E-03 | 64.24  | 24.64 | 9.13E-03 | 52.86   | 43.47  | 2.24E-01 | 20.10  | 12.14 | 9.78E-02 | 30.72  | 35.04 | 3.81E-01 |
| cg05076914    | 13.82  | 4.63  | 2.83E-03 | 15.92  | 7.07  | 2.42E-02 | 10.39   | 13.27  | 4.34E-01 | 15.22  | 10.05 | 1.30E-01 | 10.51  | 9.50  | 2.69E-01 |
| cg14633721    | 16.98  | 5.69  | 2.84E-03 | 16.39  | 8.93  | 6.64E-02 | 23.80   | 10.65  | 2.55E-02 | 13.39  | 15.36 | 3.83E-01 | 9.92   | 13.74 | 4.70E-01 |
| cg20888326    | 23.11  | 7.74  | 2.84E-03 | 30.10  | 9.72  | 1.95E-03 | -11.83  | 27.25  | 6.64E-01 | 21.69  | 42.66 | 6.11E-01 | 16.86  | 15.44 | 2.75E-01 |
| cg10930226    | 33.17  | 11.12 | 2.84E-03 | 20.90  | 19.23 | 2.77E-01 | 27.86   | 39.76  | 4.84E-01 | 29.73  | 16.63 | 7.38E-02 | 76.15  | 29.61 | 1.01E-02 |
| cg13249789    | 41.12  | 13.78 | 2.84E-03 | 92.65  | 39.72 | 1.97E-02 | 112.96  | 197.92 | 5.68E-01 | 29.54  | 13.11 | 2.42E-02 | 77.22  | 47.59 | 1.05E-01 |
| cg14663965    | 8.20   | 2.75  | 2.85E-03 | 9.51   | 3.83  | 1.30E-02 | 8.00    | 6.71   | 2.33E-01 | 17.52  | 12.67 | 1.67E-01 | 4.20   | 5.30  | 4.28E-01 |
| cg07047808    | 14.71  | 4.93  | 2.86E-03 | 15.40  | 9.53  | 1.06E-01 | -24.66  | 23.79  | 3.00E-01 | 17.16  | 6.54  | 8.68E-03 | 15.60  | 14.18 | 2.71E-01 |
| cg25137687    | 20.82  | 6.98  | 2.87E-03 | 34.14  | 22.67 | 1.32E-01 | -69.04  | 99.95  | 4.90E-01 | 22.13  | 7.61  | 3.62E-03 | -12.71 | 29.12 | 6.62E-01 |
| cg14507868    | 20.24  | 6.79  | 2.88E-03 | 37.99  | 15.58 | 1.47E-02 | 12.55   | 19.42  | 5.18E-01 | 21.15  | 9.90  | 3.27E-02 | 7.08   | 14.56 | 6.26E-01 |
| cg15774543    | -26.29 | 8.82  | 2.88E-03 | -24.67 | 33.05 | 4.55E-01 | 139.72  | 136.27 | 3.05E-01 | -27.86 | 9.47  | 3.27E-03 | -16.69 | 36.86 | 6.51E-01 |
| cg10024730    | 20.48  | 6.87  | 2.88E-03 | 22.07  | 10.36 | 3.32E-02 | 16.88   | 13.27  | 2.03E-01 | 25.43  | 18.34 | 1.66E-01 | 17.65  | 17.67 | 3.18E-01 |
| cg03773731    | 30.85  | 10.35 | 2.88E-03 | 38.19  | 16.62 | 2.16E-02 | 6.54    | 25.06  | 7.94E-01 | 11.32  | 30.93 | 7.14E-01 | 41.43  | 18.03 | 2.16E-02 |
| cg26981593    | 25.34  | 8.50  | 2.89E-03 | 39.55  | 17.69 | 2.54E-02 | 18.10   | 21.76  | 4.06E-01 | 17.87  | 12.08 | 1.39E-01 | 37.88  | 24.44 | 1.21E-01 |
| cg15047774    | 16.25  | 5.45  | 2.89E-03 | 23.28  | 11.03 | 3.48E-02 | 33.35   | 19.30  | 8.40E-02 | 7.16   | 8.19  | 3.83E-01 | 20.32  | 11.31 | 7.25E-02 |
| cg19095568    | 11.80  | 3.96  | 2.89E-03 | 15.32  | 6.88  | 2.59E-02 | 0.96    | 21.52  | 9.64E-01 | 15.50  | 6.29  | 1.38E-02 | 2.29   | 8.12  | 7.78E-01 |
| cg13912027    | 16.53  | 5.55  | 2.89E-03 | 20.08  | 7.61  | 8.34E-03 | 16.22   | 16.89  | 3.37E-01 | 30.10  | 19.75 | 1.28E-01 | 6.15   | 10.46 | 5.57E-01 |
| cg04870460    | -14.84 | 4.98  | 2.89E-03 | -7.90  | 6.53  | 2.27E-01 | -15.29  | 11.71  | 1.92E-01 | -3.69  | 26.87 | 8.91E-01 | -26.59 | 8.42  | 1.59E-03 |
| cg22233667    | -16.05 | 5.39  | 2.90E-03 | -25.81 | 14.11 | 6.74E-02 | -10.29  | 24.08  | 6.69E-01 | -14.86 | 6.37  | 1.96E-02 | -12.83 | 18.18 | 4.80E-01 |

|            |        |       |          |         |       |          |         |        |          |        |       |          |        |       |          |
|------------|--------|-------|----------|---------|-------|----------|---------|--------|----------|--------|-------|----------|--------|-------|----------|
| cg11760395 | 6.29   | 2.11  | 2.90E-03 | 7.41    | 3.48  | 3.34E-02 | 9.83    | 5.03   | 5.05E-02 | 3.54   | 3.57  | 3.21E-01 | 5.58   | 6.48  | 3.89E-01 |
| cg27317439 | 17.10  | 5.74  | 2.90E-03 | 2.20    | 9.53  | 8.17E-01 | 28.31   | 15.52  | 6.82E-02 | 22.66  | 7.72  | 3.35E-03 | 21.02  | 12.69 | 9.76E-02 |
| cg12157045 | -28.61 | 9.61  | 2.90E-03 | 7.63    | 24.33 | 7.54E-01 | -46.24  | 123.83 | 7.09E-01 | -35.47 | 10.85 | 1.08E-03 | -31.74 | 41.35 | 4.43E-01 |
| cg06733602 | -13.08 | 4.39  | 2.91E-03 | -13.35  | 6.52  | 4.07E-02 | -3.00   | 11.11  | 7.87E-01 | -31.24 | 13.72 | 2.28E-02 | -11.66 | 8.20  | 1.55E-01 |
| cg05407442 | -69.08 | 23.21 | 2.91E-03 | -72.95  | 29.57 | 1.36E-02 | 139.46  | 149.72 | 3.52E-01 | -0.40  | 90.05 | 9.96E-01 | -93.55 | 42.82 | 2.89E-02 |
| cg05601722 | 30.25  | 10.16 | 2.91E-03 | 46.97   | 16.67 | 4.84E-03 | 27.80   | 17.45  | 1.11E-01 | 36.72  | 18.36 | 4.55E-02 | -6.89  | 23.94 | 7.73E-01 |
| cg23986470 | -32.76 | 11.00 | 2.91E-03 | -13.36  | 18.45 | 4.69E-01 | -132.90 | 175.63 | 4.49E-01 | -39.10 | 14.36 | 6.47E-03 | -85.11 | 47.76 | 7.47E-02 |
| cg09529783 | -19.85 | 6.67  | 2.92E-03 | -33.68  | 11.50 | 3.39E-03 | -18.33  | 17.12  | 2.84E-01 | -9.90  | 10.65 | 3.53E-01 | -15.44 | 19.27 | 4.23E-01 |
| cg23928910 | -27.61 | 9.28  | 2.93E-03 | -20.39  | 22.41 | 3.63E-01 | 18.50   | 120.78 | 8.78E-01 | -32.13 | 10.75 | 2.79E-03 | -3.55  | 33.34 | 9.15E-01 |
| cg06217494 | 33.59  | 11.29 | 2.93E-03 | 36.97   | 17.78 | 3.75E-02 | 33.70   | 27.10  | 2.14E-01 | 38.50  | 28.04 | 1.70E-01 | 25.22  | 22.11 | 2.54E-01 |
| cg06382167 | 42.38  | 14.25 | 2.94E-03 | 52.11   | 19.55 | 7.68E-03 | 40.05   | 41.57  | 3.35E-01 | 77.65  | 43.98 | 7.75E-02 | 7.38   | 28.75 | 7.98E-01 |
| cg12044693 | 15.62  | 5.25  | 2.95E-03 | 17.06   | 6.54  | 9.06E-03 | 11.56   | 18.75  | 5.37E-01 | 10.44  | 18.45 | 5.72E-01 | 14.65  | 11.92 | 2.19E-01 |
| cg03532926 | 14.41  | 4.85  | 2.95E-03 | 21.21   | 9.04  | 1.89E-02 | 8.94    | 10.87  | 4.11E-01 | 11.78  | 10.01 | 2.39E-01 | 13.51  | 9.18  | 1.41E-01 |
| cg09055988 | -17.38 | 5.85  | 2.95E-03 | -17.79  | 13.76 | 1.96E-01 | -4.78   | 22.64  | 8.33E-01 | -20.48 | 7.26  | 4.78E-03 | -5.39  | 18.13 | 7.66E-01 |
| cg22055728 | 35.07  | 11.80 | 2.96E-03 | 14.77   | 25.32 | 5.60E-01 | -8.10   | 97.10  | 9.33E-01 | 45.05  | 14.82 | 2.37E-03 | 25.58  | 32.19 | 4.27E-01 |
| cg05207184 | -50.68 | 17.05 | 2.96E-03 | -107.55 | 70.74 | 1.28E-01 | -259.71 | 224.29 | 2.47E-01 | -51.41 | 18.41 | 5.24E-03 | 14.78  | 60.89 | 8.08E-01 |
| cg03611151 | 14.95  | 5.03  | 2.97E-03 | 14.99   | 8.24  | 6.89E-02 | 23.74   | 10.10  | 1.87E-02 | 17.22  | 12.50 | 1.68E-01 | 3.12   | 10.80 | 7.73E-01 |
| cg13217116 | 36.82  | 12.39 | 2.97E-03 | 39.59   | 38.51 | 3.04E-01 | -123.04 | 134.22 | 3.59E-01 | 37.54  | 13.87 | 6.79E-03 | 42.37  | 41.47 | 3.07E-01 |
| cg14014879 | 30.39  | 10.23 | 2.98E-03 | 22.86   | 20.32 | 2.61E-01 | 41.96   | 25.19  | 9.58E-02 | 27.48  | 15.59 | 7.79E-02 | 38.72  | 26.37 | 1.42E-01 |
| cg24519084 | 29.05  | 9.78  | 2.98E-03 | 41.19   | 20.61 | 4.57E-02 | 20.16   | 29.33  | 4.92E-01 | 24.18  | 14.74 | 1.01E-01 | 30.84  | 20.71 | 1.37E-01 |
| cg07470694 | -19.47 | 6.56  | 2.98E-03 | -21.72  | 8.19  | 7.95E-03 | -19.13  | 22.82  | 4.02E-01 | -39.83 | 20.04 | 4.68E-02 | 1.89   | 15.99 | 9.06E-01 |
| cg07912402 | 115.39 | 38.86 | 2.98E-03 | 102.73  | 61.22 | 9.34E-02 | 370.89  | 195.62 | 5.80E-02 | 131.47 | 91.42 | 1.50E-01 | 94.47  | 63.30 | 1.36E-01 |
| cg17462329 | 18.64  | 6.28  | 2.99E-03 | 16.04   | 10.08 | 1.11E-01 | 15.59   | 13.80  | 2.58E-01 | 31.70  | 12.24 | 9.61E-03 | 5.94   | 16.71 | 7.22E-01 |
| cg22045977 | -11.68 | 3.94  | 2.99E-03 | -20.53  | 8.39  | 1.44E-02 | -12.81  | 16.04  | 4.24E-01 | -10.60 | 4.98  | 3.31E-02 | 2.64   | 12.87 | 8.38E-01 |
| cg07053841 | -7.89  | 2.66  | 2.99E-03 | -10.96  | 4.78  | 2.18E-02 | -6.15   | 7.08   | 3.85E-01 | -6.96  | 4.13  | 9.17E-02 | -5.52  | 7.20  | 4.44E-01 |
| cg23349517 | -16.89 | 5.69  | 2.99E-03 | -21.37  | 8.43  | 1.13E-02 | -0.98   | 14.66  | 9.47E-01 | -30.82 | 15.52 | 4.70E-02 | -11.05 | 11.17 | 3.22E-01 |
| cg12664038 | 8.43   | 2.84  | 2.99E-03 | 8.95    | 3.89  | 2.14E-02 | 13.37   | 6.91   | 5.30E-02 | 16.05  | 12.85 | 2.12E-01 | 2.46   | 5.70  | 6.66E-01 |
| cg09829319 | 28.20  | 9.50  | 3.00E-03 | 25.01   | 12.96 | 5.37E-02 | 5.20    | 30.44  | 8.64E-01 | 64.55  | 31.03 | 3.75E-02 | 30.22  | 18.24 | 9.75E-02 |
| cg18817426 | 18.95  | 6.38  | 3.00E-03 | 18.34   | 14.33 | 2.01E-01 | 12.52   | 14.03  | 3.72E-01 | 22.17  | 10.29 | 3.11E-02 | 19.94  | 13.94 | 1.53E-01 |
| cg10512951 | -11.25 | 3.79  | 3.00E-03 | -12.79  | 6.68  | 5.56E-02 | -4.76   | 13.34  | 7.21E-01 | -12.92 | 5.40  | 1.66E-02 | -3.60  | 11.75 | 7.59E-01 |
| cg19871235 | -7.49  | 2.52  | 3.00E-03 | -12.22  | 4.22  | 3.76E-03 | -4.44   | 6.69   | 5.08E-01 | -8.22  | 3.99  | 3.93E-02 | 0.08   | 5.75  | 9.88E-01 |
| cg23976431 | -14.47 | 4.88  | 3.01E-03 | -20.82  | 6.60  | 1.61E-03 | -17.36  | 10.45  | 9.67E-02 | 2.68   | 10.11 | 7.91E-01 | -16.18 | 8.15  | 4.71E-02 |
| cg08315133 | -13.26 | 4.47  | 3.02E-03 | -12.02  | 6.56  | 6.67E-02 | -12.94  | 10.74  | 2.28E-01 | -4.08  | 15.27 | 7.90E-01 | -18.45 | 8.53  | 3.05E-02 |
| cg02578087 | -6.85  | 2.31  | 3.02E-03 | -5.68   | 3.15  | 7.10E-02 | 0.30    | 6.04   | 9.61E-01 | -10.40 | 6.52  | 1.10E-01 | -12.26 | 4.87  | 1.18E-02 |
| cg13738144 | 19.52  | 6.58  | 3.02E-03 | 23.80   | 10.50 | 2.34E-02 | 15.56   | 16.71  | 3.52E-01 | 24.06  | 14.45 | 9.60E-02 | 11.30  | 13.33 | 3.96E-01 |

|            |        |       |          |        |       |          |        |        |          |         |       |          |        |       |          |
|------------|--------|-------|----------|--------|-------|----------|--------|--------|----------|---------|-------|----------|--------|-------|----------|
| cg02451691 | 25.30  | 8.53  | 3.03E-03 | 14.99  | 18.15 | 4.09E-01 | 15.79  | 33.82  | 6.41E-01 | 32.82   | 10.91 | 2.64E-03 | 8.83   | 26.46 | 7.39E-01 |
| cg26162932 | 41.12  | 13.87 | 3.03E-03 | 42.98  | 16.31 | 8.40E-03 | -48.79 | 72.82  | 5.03E-01 | 37.49   | 71.04 | 5.98E-01 | 51.27  | 30.83 | 9.64E-02 |
| cg27425612 | 22.72  | 7.67  | 3.03E-03 | -6.32  | 34.50 | 8.55E-01 | -37.82 | 127.13 | 7.66E-01 | 26.53   | 8.09  | 1.04E-03 | -12.72 | 34.39 | 7.12E-01 |
| cg03889226 | 37.61  | 12.69 | 3.03E-03 | 26.96  | 15.77 | 8.74E-02 | 13.11  | 41.14  | 7.50E-01 | 79.86   | 49.70 | 1.08E-01 | 71.28  | 28.93 | 1.38E-02 |
| cg14059126 | -28.20 | 9.51  | 3.04E-03 | -23.48 | 23.28 | 3.13E-01 | -19.85 | 42.59  | 6.41E-01 | -31.56  | 11.56 | 6.30E-03 | -17.97 | 29.34 | 5.40E-01 |
| cg27146050 | 12.02  | 4.06  | 3.04E-03 | 15.57  | 5.79  | 7.16E-03 | 6.18   | 8.91   | 4.88E-01 | 14.42   | 10.68 | 1.77E-01 | 6.47   | 10.21 | 5.27E-01 |
| cg13080465 | -37.93 | 12.80 | 3.04E-03 | -15.64 | 21.80 | 4.73E-01 | -66.16 | 43.09  | 1.25E-01 | -35.96  | 30.26 | 2.35E-01 | -52.21 | 20.54 | 1.10E-02 |
| cg08650934 | 13.79  | 4.65  | 3.04E-03 | 9.77   | 8.19  | 2.33E-01 | 10.10  | 10.93  | 3.55E-01 | 15.14   | 7.57  | 4.54E-02 | 26.26  | 13.60 | 5.35E-02 |
| cg04075973 | 19.19  | 6.47  | 3.04E-03 | 9.76   | 9.90  | 3.24E-01 | 5.94   | 26.71  | 8.24E-01 | 34.13   | 10.63 | 1.33E-03 | 16.10  | 13.61 | 2.37E-01 |
| cg15790184 | 17.50  | 5.91  | 3.05E-03 | 18.60  | 10.33 | 7.19E-02 | 18.70  | 11.44  | 1.02E-01 | 8.57    | 11.10 | 4.40E-01 | 32.51  | 16.82 | 5.33E-02 |
| cg01375869 | -32.23 | 10.88 | 3.05E-03 | -25.12 | 15.97 | 1.16E-01 | -12.09 | 50.54  | 8.11E-01 | -56.38  | 26.04 | 3.03E-02 | -32.28 | 19.38 | 9.59E-02 |
| cg01053259 | 18.90  | 6.38  | 3.05E-03 | 21.45  | 19.49 | 2.71E-01 | 12.90  | 29.85  | 6.66E-01 | 20.32   | 7.15  | 4.48E-03 | -3.29  | 28.22 | 9.07E-01 |
| cg02609473 | 60.19  | 20.32 | 3.06E-03 | 34.15  | 21.22 | 1.08E-01 | 38.45  | 49.79  | 4.40E-01 | 142.02  | 56.01 | 1.12E-02 | 79.24  | 31.16 | 1.10E-02 |
| cg08800670 | -17.78 | 6.00  | 3.06E-03 | -20.30 | 8.86  | 2.20E-02 | -23.03 | 14.47  | 1.11E-01 | 1.76    | 12.83 | 8.91E-01 | -28.00 | 12.72 | 2.77E-02 |
| cg08782899 | -14.85 | 5.01  | 3.06E-03 | -11.52 | 6.98  | 9.86E-02 | -17.76 | 11.34  | 1.17E-01 | -13.36  | 15.68 | 3.94E-01 | -21.82 | 11.62 | 6.04E-02 |
| cg06996175 | 11.98  | 4.05  | 3.07E-03 | 11.04  | 5.28  | 3.66E-02 | 4.70   | 9.87   | 6.34E-01 | 23.16   | 14.10 | 1.00E-01 | 17.21  | 10.02 | 8.59E-02 |
| cg05534865 | 23.21  | 7.84  | 3.07E-03 | 17.91  | 16.27 | 2.71E-01 | 26.81  | 15.87  | 9.13E-02 | 15.08   | 12.78 | 2.38E-01 | 46.44  | 20.44 | 2.31E-02 |
| cg24803687 | -10.20 | 3.45  | 3.07E-03 | -12.49 | 7.24  | 8.48E-02 | -15.52 | 14.73  | 2.92E-01 | -7.91   | 4.52  | 8.03E-02 | -13.93 | 9.24  | 1.32E-01 |
| cg07004443 | 44.58  | 15.06 | 3.08E-03 | 42.22  | 20.37 | 3.82E-02 | 75.07  | 43.97  | 8.78E-02 | 38.52   | 40.55 | 3.42E-01 | 37.24  | 33.87 | 2.72E-01 |
| cg09744376 | 25.71  | 8.69  | 3.08E-03 | 40.15  | 17.48 | 2.16E-02 | 21.66  | 47.70  | 6.50E-01 | 19.91   | 10.96 | 6.93E-02 | 28.04  | 28.68 | 3.28E-01 |
| cg07050525 | 32.69  | 11.04 | 3.08E-03 | 36.22  | 12.93 | 5.07E-03 | 20.79  | 43.18  | 6.30E-01 | 147.51  | 74.21 | 4.68E-02 | 17.13  | 21.12 | 4.17E-01 |
| cg03021690 | 21.29  | 7.19  | 3.08E-03 | 29.65  | 21.05 | 1.59E-01 | 48.91  | 23.78  | 3.97E-02 | 17.89   | 8.45  | 3.43E-02 | 5.85   | 27.60 | 8.32E-01 |
| cg05404787 | 26.43  | 8.93  | 3.08E-03 | 32.67  | 15.07 | 3.01E-02 | 31.58  | 17.20  | 6.63E-02 | 13.62   | 18.69 | 4.66E-01 | 22.09  | 23.03 | 3.38E-01 |
| cg22937444 | 27.67  | 9.35  | 3.08E-03 | 42.52  | 17.93 | 1.77E-02 | 21.92  | 16.38  | 1.81E-01 | 24.70   | 18.83 | 1.90E-01 | 18.47  | 23.71 | 4.36E-01 |
| cg24098643 | -65.19 | 22.03 | 3.09E-03 | -58.17 | 29.10 | 4.56E-02 | -31.64 | 131.71 | 8.10E-01 | -177.54 | 75.08 | 1.80E-02 | -50.12 | 39.40 | 2.03E-01 |
| cg27625897 | 23.04  | 7.79  | 3.09E-03 | 28.83  | 23.95 | 2.29E-01 | 47.99  | 34.63  | 1.66E-01 | 21.58   | 8.82  | 1.44E-02 | 11.64  | 30.72 | 7.05E-01 |
| cg05213387 | -33.48 | 11.32 | 3.09E-03 | -19.58 | 19.02 | 3.03E-01 | -34.81 | 51.32  | 4.98E-01 | -54.53  | 26.85 | 4.23E-02 | -36.15 | 17.47 | 3.85E-02 |
| cg11648249 | -39.89 | 13.49 | 3.10E-03 | -44.98 | 20.41 | 2.76E-02 | -25.18 | 23.76  | 2.89E-01 | -91.20  | 43.09 | 3.43E-02 | -22.39 | 35.64 | 5.30E-01 |
| cg26000554 | 17.83  | 6.03  | 3.10E-03 | 46.43  | 28.66 | 1.05E-01 | 15.58  | 72.24  | 8.29E-01 | 13.89   | 6.71  | 3.84E-02 | 31.60  | 16.08 | 4.93E-02 |
| cg14609668 | 22.82  | 7.72  | 3.10E-03 | 23.70  | 12.84 | 6.50E-02 | 32.56  | 14.30  | 2.28E-02 | 17.61   | 18.12 | 3.31E-01 | 9.55   | 18.91 | 6.13E-01 |
| cg14449575 | 19.52  | 6.60  | 3.11E-03 | 9.30   | 9.18  | 3.11E-01 | 30.98  | 14.60  | 3.38E-02 | 18.57   | 22.35 | 4.06E-01 | 35.21  | 15.06 | 1.94E-02 |
| cg16234907 | 18.58  | 6.28  | 3.11E-03 | 21.08  | 13.00 | 1.05E-01 | 23.96  | 22.59  | 2.89E-01 | 20.31   | 9.03  | 2.45E-02 | 9.61   | 13.88 | 4.89E-01 |
| cg06749098 | 45.21  | 15.29 | 3.12E-03 | 74.76  | 41.92 | 7.46E-02 | -24.20 | 162.10 | 8.81E-01 | 37.56   | 17.50 | 3.18E-02 | 72.03  | 49.84 | 1.48E-01 |
| cg00529742 | -13.09 | 4.43  | 3.12E-03 | -10.04 | 9.99  | 3.15E-01 | -15.77 | 16.47  | 3.38E-01 | -11.59  | 5.61  | 3.86E-02 | -25.64 | 13.55 | 5.84E-02 |
| cg13457961 | -21.50 | 7.27  | 3.12E-03 | -50.67 | 27.16 | 6.21E-02 | -66.83 | 105.30 | 5.26E-01 | -19.63  | 7.74  | 1.12E-02 | -5.31  | 36.04 | 8.83E-01 |



|            |        |       |          |         |       |          |         |        |          |         |       |          |        |       |          |
|------------|--------|-------|----------|---------|-------|----------|---------|--------|----------|---------|-------|----------|--------|-------|----------|
| cg04496246 | 36.92  | 12.49 | 3.12E-03 | 38.33   | 20.54 | 6.21E-02 | -52.16  | 123.59 | 6.73E-01 | 40.13   | 17.53 | 2.21E-02 | 25.86  | 37.29 | 4.88E-01 |
| cg17529436 | 21.93  | 7.42  | 3.13E-03 | 25.39   | 17.86 | 1.55E-01 | -1.94   | 36.52  | 9.58E-01 | 21.85   | 8.95  | 1.47E-02 | 26.49  | 23.67 | 2.63E-01 |
| cg09884213 | -12.66 | 4.28  | 3.13E-03 | -12.40  | 10.78 | 2.50E-01 | -0.77   | 19.53  | 9.68E-01 | -12.79  | 5.17  | 1.34E-02 | -17.47 | 13.00 | 1.79E-01 |
| cg07880384 | -11.19 | 3.79  | 3.13E-03 | -12.02  | 5.26  | 2.23E-02 | -7.40   | 8.30   | 3.73E-01 | -22.71  | 13.01 | 8.09E-02 | -7.91  | 8.73  | 3.65E-01 |
| cg26129606 | -11.84 | 4.01  | 3.13E-03 | -15.73  | 8.80  | 7.40E-02 | -23.10  | 12.14  | 5.70E-02 | -10.46  | 5.29  | 4.79E-02 | -0.47  | 12.12 | 9.69E-01 |
| cg13583272 | 7.58   | 2.57  | 3.14E-03 | 8.39    | 4.27  | 4.92E-02 | 8.94    | 5.20   | 8.53E-02 | 2.11    | 5.14  | 6.82E-01 | 12.59  | 6.71  | 6.05E-02 |
| cg27113015 | -14.65 | 4.96  | 3.14E-03 | -16.98  | 7.99  | 3.36E-02 | -15.36  | 11.26  | 1.72E-01 | -4.31   | 11.63 | 7.11E-01 | -18.20 | 10.15 | 7.31E-02 |
| cg21341592 | 20.18  | 6.83  | 3.14E-03 | 25.86   | 10.24 | 1.15E-02 | 16.28   | 14.21  | 2.52E-01 | 15.18   | 19.16 | 4.28E-01 | 15.12  | 15.43 | 3.27E-01 |
| cg18512262 | -10.01 | 3.39  | 3.15E-03 | -13.25  | 7.04  | 6.00E-02 | -10.53  | 14.79  | 4.76E-01 | -8.97   | 4.33  | 3.85E-02 | -8.65  | 10.49 | 4.10E-01 |
| cg16657928 | -38.25 | 12.95 | 3.15E-03 | -41.38  | 14.20 | 3.56E-03 | 111.86  | 167.55 | 5.04E-01 | -148.15 | 96.48 | 1.25E-01 | -12.49 | 34.25 | 7.15E-01 |
| cg10222579 | 16.67  | 5.65  | 3.15E-03 | 6.01    | 12.87 | 6.41E-01 | 32.12   | 24.38  | 1.88E-01 | 17.15   | 6.86  | 1.24E-02 | 28.55  | 20.51 | 1.64E-01 |
| cg06154159 | -15.12 | 5.12  | 3.15E-03 | -13.74  | 9.57  | 1.51E-01 | -22.13  | 11.30  | 5.03E-02 | -15.68  | 9.26  | 9.03E-02 | -9.13  | 11.37 | 4.22E-01 |
| cg03344384 | -8.68  | 2.94  | 3.15E-03 | -10.76  | 4.22  | 1.08E-02 | -6.98   | 7.54   | 3.55E-01 | -2.92   | 8.42  | 7.29E-01 | -8.50  | 6.00  | 1.57E-01 |
| cg22806908 | 34.40  | 11.65 | 3.16E-03 | 34.36   | 21.50 | 1.10E-01 | 16.45   | 33.24  | 6.21E-01 | 43.50   | 17.58 | 1.33E-02 | 22.01  | 30.70 | 4.73E-01 |
| cg08852033 | -14.72 | 4.99  | 3.16E-03 | -15.25  | 6.87  | 2.63E-02 | -6.47   | 13.10  | 6.21E-01 | -1.52   | 15.76 | 9.23E-01 | -24.54 | 10.46 | 1.89E-02 |
| cg21062347 | -13.47 | 4.56  | 3.16E-03 | -8.71   | 7.03  | 2.15E-01 | -11.99  | 9.33   | 1.99E-01 | -29.80  | 12.38 | 1.60E-02 | -14.13 | 10.11 | 1.62E-01 |
| cg08129093 | -38.04 | 12.89 | 3.16E-03 | -49.97  | 17.18 | 3.63E-03 | 3.01    | 52.59  | 9.54E-01 | -32.71  | 37.29 | 3.80E-01 | -24.02 | 25.37 | 3.44E-01 |
| cg21759057 | 38.07  | 12.90 | 3.17E-03 | 52.82   | 32.11 | 1.00E-01 | -42.74  | 114.87 | 7.10E-01 | 38.68   | 14.98 | 9.81E-03 | 16.47  | 44.44 | 7.11E-01 |
| cg27425169 | -14.80 | 5.01  | 3.17E-03 | -19.54  | 9.40  | 3.77E-02 | -27.24  | 13.36  | 4.15E-02 | -12.25  | 8.13  | 1.32E-01 | -3.79  | 11.39 | 7.39E-01 |
| cg13189271 | 10.44  | 3.54  | 3.17E-03 | 13.53   | 5.39  | 1.20E-02 | 11.80   | 8.90   | 1.85E-01 | 9.27    | 8.26  | 2.61E-01 | 4.54   | 7.45  | 5.42E-01 |
| cg15457934 | -15.10 | 5.12  | 3.17E-03 | -22.25  | 6.73  | 9.51E-04 | -7.16   | 14.48  | 6.21E-01 | -9.51   | 19.03 | 6.17E-01 | -2.93  | 10.80 | 7.86E-01 |
| cg01415562 | 11.83  | 4.01  | 3.18E-03 | 14.11   | 6.05  | 1.97E-02 | 14.82   | 8.68   | 8.77E-02 | 12.71   | 13.00 | 3.28E-01 | 4.98   | 7.99  | 5.34E-01 |
| cg02210498 | -11.00 | 3.73  | 3.18E-03 | -9.29   | 6.72  | 1.67E-01 | 3.91    | 12.96  | 7.63E-01 | -11.69  | 5.26  | 2.62E-02 | -24.51 | 11.50 | 3.31E-02 |
| cg07535740 | 30.34  | 10.29 | 3.19E-03 | 26.00   | 15.23 | 8.76E-02 | 17.62   | 21.05  | 4.03E-01 | 33.76   | 28.04 | 2.29E-01 | 57.11  | 24.94 | 2.20E-02 |
| cg11878872 | 51.58  | 17.49 | 3.19E-03 | 69.16   | 43.41 | 1.11E-01 | -74.74  | 164.57 | 6.50E-01 | 49.45   | 20.08 | 1.38E-02 | 54.42  | 67.34 | 4.19E-01 |
| cg01396176 | 28.35  | 9.61  | 3.19E-03 | 50.11   | 13.63 | 2.36E-04 | 5.66    | 21.14  | 7.89E-01 | 18.21   | 17.03 | 2.85E-01 | 25.23  | 15.80 | 1.10E-01 |
| cg24815934 | -15.97 | 5.42  | 3.19E-03 | -15.54  | 7.60  | 4.09E-02 | -21.66  | 14.41  | 1.33E-01 | -9.82   | 13.76 | 4.75E-01 | -17.85 | 12.23 | 1.45E-01 |
| cg01560871 | 16.31  | 5.53  | 3.19E-03 | 7.11    | 9.16  | 4.38E-01 | 30.31   | 12.20  | 1.29E-02 | 14.78   | 10.85 | 1.73E-01 | 21.40  | 13.40 | 1.10E-01 |
| cg09155001 | 25.51  | 8.65  | 3.20E-03 | 21.88   | 13.78 | 1.13E-01 | 28.37   | 17.34  | 1.02E-01 | 13.15   | 19.99 | 5.11E-01 | 43.47  | 21.03 | 3.88E-02 |
| cg01005350 | 19.08  | 6.47  | 3.20E-03 | 13.71   | 16.04 | 3.93E-01 | 6.19    | 20.26  | 7.60E-01 | 24.31   | 7.96  | 2.25E-03 | 1.87   | 23.83 | 9.38E-01 |
| cg07282465 | -17.85 | 6.05  | 3.20E-03 | -25.97  | 12.46 | 3.71E-02 | -15.04  | 26.27  | 5.67E-01 | -16.36  | 7.69  | 3.35E-02 | -8.59  | 20.03 | 6.68E-01 |
| cg13454184 | -50.10 | 17.00 | 3.20E-03 | -55.53  | 19.96 | 5.40E-03 | -91.66  | 111.24 | 4.10E-01 | 6.06    | 85.18 | 9.43E-01 | -37.47 | 36.95 | 3.11E-01 |
| cg13595308 | -19.96 | 6.77  | 3.21E-03 | -29.85  | 11.20 | 7.67E-03 | -23.21  | 15.82  | 1.43E-01 | -0.38   | 14.16 | 9.79E-01 | -21.17 | 14.38 | 1.41E-01 |
| cg25976393 | -56.12 | 19.05 | 3.21E-03 | -131.30 | 62.60 | 3.60E-02 | -153.62 | 260.50 | 5.55E-01 | -52.36  | 21.78 | 1.62E-02 | -22.68 | 51.32 | 6.59E-01 |
| cg09246203 | -19.02 | 6.46  | 3.21E-03 | -27.76  | 8.81  | 1.62E-03 | 6.35    | 17.66  | 7.19E-01 | -27.00  | 12.97 | 3.74E-02 | -12.99 | 10.13 | 1.99E-01 |

|            |        |       |          |         |       |          |         |        |          |        |       |          |        |       |          |
|------------|--------|-------|----------|---------|-------|----------|---------|--------|----------|--------|-------|----------|--------|-------|----------|
| cg16426215 | -15.30 | 5.19  | 3.21E-03 | -21.49  | 7.84  | 6.13E-03 | -11.78  | 11.33  | 2.98E-01 | -5.68  | 15.87 | 7.21E-01 | -11.43 | 10.50 | 2.77E-01 |
| cg06964876 | 25.71  | 8.73  | 3.22E-03 | 22.64   | 15.89 | 1.54E-01 | 13.04   | 15.86  | 4.11E-01 | 25.18  | 18.53 | 1.74E-01 | 53.91  | 20.97 | 1.01E-02 |
| cg14866567 | 8.83   | 3.00  | 3.22E-03 | 6.63    | 4.15  | 1.10E-01 | 10.89   | 7.58   | 1.51E-01 | 7.38   | 6.47  | 2.54E-01 | 19.32  | 9.12  | 3.41E-02 |
| cg01806921 | -18.20 | 6.18  | 3.23E-03 | -25.27  | 9.33  | 6.75E-03 | -6.87   | 13.89  | 6.21E-01 | -14.30 | 17.35 | 4.10E-01 | -16.64 | 12.69 | 1.90E-01 |
| cg03405781 | -59.61 | 20.24 | 3.23E-03 | -66.52  | 29.03 | 2.19E-02 | 0.69    | 66.63  | 9.92E-01 | -82.59 | 42.93 | 5.44E-02 | -45.05 | 45.33 | 3.20E-01 |
| cg02455397 | 20.16  | 6.84  | 3.23E-03 | 11.90   | 18.11 | 5.11E-01 | 1.31    | 94.30  | 9.89E-01 | 23.40  | 7.72  | 2.43E-03 | 0.69   | 26.76 | 9.79E-01 |
| cg12980527 | -36.12 | 12.27 | 3.23E-03 | -33.78  | 37.78 | 3.71E-01 | -111.39 | 140.93 | 4.29E-01 | -32.52 | 13.42 | 1.54E-02 | -88.62 | 54.23 | 1.02E-01 |
| cg27385590 | -6.81  | 2.31  | 3.25E-03 | -8.67   | 3.33  | 9.12E-03 | -5.19   | 5.10   | 3.09E-01 | -8.41  | 7.48  | 2.61E-01 | -3.46  | 4.98  | 4.88E-01 |
| cg25972997 | -9.57  | 3.25  | 3.25E-03 | -15.54  | 6.01  | 9.74E-03 | -5.03   | 8.37   | 5.48E-01 | -10.58 | 5.02  | 3.52E-02 | 1.22   | 8.77  | 8.89E-01 |
| cg04505972 | -13.34 | 4.53  | 3.25E-03 | -10.86  | 8.99  | 2.27E-01 | -4.07   | 12.83  | 7.51E-01 | -16.12 | 6.47  | 1.27E-02 | -16.56 | 12.56 | 1.88E-01 |
| cg13847437 | -23.65 | 8.04  | 3.25E-03 | -13.91  | 21.07 | 5.09E-01 | -16.65  | 22.62  | 4.62E-01 | -25.19 | 9.91  | 1.10E-02 | -41.96 | 30.32 | 1.66E-01 |
| cg07032245 | 26.36  | 8.96  | 3.26E-03 | 43.16   | 30.68 | 1.60E-01 | -5.08   | 126.46 | 9.68E-01 | 28.52  | 10.11 | 4.80E-03 | 2.61   | 25.34 | 9.18E-01 |
| cg08433504 | 5.79   | 1.97  | 3.26E-03 | 4.80    | 2.79  | 8.51E-02 | 4.67    | 3.64   | 2.00E-01 | 10.56  | 7.65  | 1.68E-01 | 9.31   | 5.20  | 7.32E-02 |
| cg23760103 | -29.01 | 9.86  | 3.26E-03 | -6.92   | 17.26 | 6.88E-01 | -25.30  | 56.17  | 6.52E-01 | -39.12 | 13.42 | 3.56E-03 | -47.21 | 30.77 | 1.25E-01 |
| cg16870215 | -15.05 | 5.12  | 3.27E-03 | -17.64  | 8.29  | 3.33E-02 | -5.40   | 12.32  | 6.61E-01 | -14.77 | 10.20 | 1.48E-01 | -18.91 | 11.60 | 1.03E-01 |
| cg06867623 | 56.19  | 19.11 | 3.27E-03 | 50.11   | 26.35 | 5.72E-02 | 85.64   | 67.45  | 2.04E-01 | 107.03 | 64.21 | 9.55E-02 | 44.19  | 34.57 | 2.01E-01 |
| cg20707279 | -44.42 | 15.10 | 3.27E-03 | -119.88 | 56.39 | 3.35E-02 | -178.88 | 180.14 | 3.21E-01 | -40.48 | 16.42 | 1.37E-02 | -3.93  | 55.28 | 9.43E-01 |
| cg02903822 | -31.84 | 10.83 | 3.28E-03 | -43.40  | 15.86 | 6.22E-03 | 26.90   | 32.93  | 4.14E-01 | -31.85 | 17.71 | 7.21E-02 | -38.66 | 17.23 | 2.49E-02 |
| cg15447231 | 9.46   | 3.22  | 3.29E-03 | 10.56   | 4.67  | 2.37E-02 | 13.25   | 7.53   | 7.83E-02 | 6.30   | 7.39  | 3.94E-01 | 5.43   | 8.27  | 5.11E-01 |
| cg11530293 | 33.83  | 11.51 | 3.29E-03 | 44.16   | 18.04 | 1.44E-02 | -53.30  | 57.44  | 3.53E-01 | 39.91  | 15.65 | 1.08E-02 | 13.79  | 28.99 | 6.34E-01 |
| cg24506394 | -26.77 | 9.11  | 3.29E-03 | -25.41  | 21.79 | 2.44E-01 | 0.57    | 37.45  | 9.88E-01 | -32.78 | 11.20 | 3.43E-03 | -6.60  | 28.08 | 8.14E-01 |
| cg13048591 | 23.89  | 8.13  | 3.29E-03 | 30.85   | 14.68 | 3.56E-02 | 4.28    | 14.49  | 7.68E-01 | 48.33  | 20.24 | 1.69E-02 | 23.26  | 12.72 | 6.76E-02 |
| cg03386791 | -16.44 | 5.59  | 3.29E-03 | -21.98  | 7.93  | 5.57E-03 | -19.74  | 12.09  | 1.03E-01 | -20.74 | 18.97 | 2.74E-01 | 2.58   | 12.45 | 8.36E-01 |
| cg17719126 | -36.85 | 12.54 | 3.29E-03 | -50.76  | 23.12 | 2.81E-02 | -18.88  | 90.53  | 8.35E-01 | -29.32 | 18.63 | 1.15E-01 | -35.40 | 25.95 | 1.72E-01 |
| cg03613942 | -10.09 | 3.43  | 3.29E-03 | -12.00  | 6.35  | 5.88E-02 | -0.70   | 11.54  | 9.52E-01 | -12.54 | 5.04  | 1.28E-02 | -4.53  | 8.72  | 6.04E-01 |
| cg20673255 | 21.50  | 7.31  | 3.30E-03 | 34.84   | 17.18 | 4.25E-02 | 15.80   | 17.86  | 3.76E-01 | 21.42  | 9.82  | 2.92E-02 | 6.67   | 23.62 | 7.78E-01 |
| cg07138603 | 29.67  | 10.10 | 3.30E-03 | 56.72   | 26.24 | 3.07E-02 | -19.15  | 75.46  | 8.00E-01 | 28.69  | 11.68 | 1.40E-02 | 1.99   | 34.34 | 9.54E-01 |
| cg06955484 | 16.96  | 5.77  | 3.30E-03 | 24.88   | 10.53 | 1.81E-02 | 17.64   | 14.66  | 2.29E-01 | 22.38  | 10.87 | 3.96E-02 | 1.69   | 11.25 | 8.80E-01 |
| cg07456480 | -10.92 | 3.72  | 3.30E-03 | -7.41   | 7.59  | 3.29E-01 | -9.83   | 8.45   | 2.45E-01 | -10.43 | 5.72  | 6.83E-02 | -19.50 | 9.72  | 4.49E-02 |
| cg18648031 | 24.15  | 8.22  | 3.31E-03 | 31.63   | 11.97 | 8.22E-03 | 16.73   | 17.13  | 3.29E-01 | 19.98  | 23.08 | 3.87E-01 | 16.61  | 19.91 | 4.04E-01 |
| cg17890764 | 14.56  | 4.96  | 3.31E-03 | 11.26   | 7.57  | 1.37E-01 | 23.93   | 10.48  | 2.24E-02 | 15.46  | 11.31 | 1.71E-01 | 9.05   | 12.58 | 4.72E-01 |
| cg23408442 | 29.88  | 10.18 | 3.32E-03 | 57.01   | 22.12 | 9.96E-03 | 7.02    | 23.03  | 7.60E-01 | 23.07  | 12.45 | 6.40E-02 | 51.92  | 30.19 | 8.54E-02 |
| cg10203943 | -24.66 | 8.40  | 3.32E-03 | -20.56  | 24.41 | 4.00E-01 | -63.12  | 56.58  | 2.65E-01 | -22.03 | 9.46  | 1.98E-02 | -48.61 | 31.46 | 1.22E-01 |
| cg05803296 | 14.66  | 4.99  | 3.32E-03 | 18.05   | 7.05  | 1.04E-02 | 12.41   | 13.18  | 3.47E-01 | 8.05   | 12.63 | 5.24E-01 | 12.92  | 11.22 | 2.50E-01 |
| cg04826355 | 120.77 | 41.14 | 3.33E-03 | 150.32  | 67.48 | 2.59E-02 | -54.92  | 245.60 | 8.23E-01 | 178.72 | 99.74 | 7.31E-02 | 83.79  | 62.71 | 1.82E-01 |

|            |        |       |          |        |       |          |         |        |          |         |       |          |        |       |          |
|------------|--------|-------|----------|--------|-------|----------|---------|--------|----------|---------|-------|----------|--------|-------|----------|
| cg04983933 | 28.11  | 9.57  | 3.33E-03 | 11.04  | 12.39 | 3.73E-01 | 38.49   | 15.26  | 1.16E-02 | 18.58   | 20.47 | 3.64E-01 | 52.06  | 18.55 | 5.00E-03 |
| cg16090347 | 44.25  | 15.07 | 3.33E-03 | 49.86  | 20.37 | 1.44E-02 | 12.42   | 59.84  | 8.36E-01 | 52.05   | 39.53 | 1.88E-01 | 35.26  | 30.52 | 2.48E-01 |
| cg05844937 | 23.60  | 8.04  | 3.33E-03 | 31.94  | 11.05 | 3.85E-03 | 25.66   | 37.83  | 4.98E-01 | -12.54  | 42.40 | 7.67E-01 | 15.37  | 12.88 | 2.33E-01 |
| cg09222732 | -24.65 | 8.40  | 3.34E-03 | -25.49 | 14.08 | 7.02E-02 | -8.26   | 20.34  | 6.85E-01 | -45.20  | 20.24 | 2.55E-02 | -21.18 | 15.30 | 1.66E-01 |
| cg17132696 | -13.87 | 4.73  | 3.36E-03 | -16.27 | 12.13 | 1.80E-01 | -21.14  | 20.93  | 3.13E-01 | -10.87  | 5.64  | 5.38E-02 | -28.37 | 15.40 | 6.55E-02 |
| cg19906737 | 26.12  | 8.91  | 3.36E-03 | 29.53  | 19.91 | 1.38E-01 | -207.60 | 208.60 | 3.20E-01 | 26.08   | 10.10 | 9.80E-03 | 14.87  | 63.11 | 8.14E-01 |
| cg08661164 | -12.60 | 4.30  | 3.36E-03 | -14.93 | 11.33 | 1.88E-01 | -4.51   | 17.19  | 7.93E-01 | -13.30  | 5.04  | 8.37E-03 | -7.64  | 16.39 | 6.41E-01 |
| cg03190045 | -20.35 | 6.94  | 3.37E-03 | -15.18 | 15.46 | 3.26E-01 | -12.43  | 37.36  | 7.39E-01 | -22.33  | 8.29  | 7.09E-03 | -19.19 | 27.48 | 4.85E-01 |
| cg19802390 | 8.66   | 2.95  | 3.37E-03 | 7.79   | 4.26  | 6.76E-02 | 7.46    | 6.44   | 2.47E-01 | 4.66    | 8.39  | 5.79E-01 | 14.91  | 6.85  | 2.94E-02 |
| cg26121053 | -21.46 | 7.32  | 3.38E-03 | -16.27 | 9.43  | 8.45E-02 | -16.20  | 37.16  | 6.63E-01 | -32.75  | 19.45 | 9.23E-02 | -29.48 | 15.74 | 6.11E-02 |
| cg07859753 | -8.92  | 3.04  | 3.38E-03 | -15.88 | 5.79  | 6.07E-03 | -1.41   | 10.65  | 8.95E-01 | -6.49   | 4.47  | 1.46E-01 | -7.91  | 7.24  | 2.75E-01 |
| cg21468416 | -20.55 | 7.02  | 3.40E-03 | -24.59 | 10.93 | 2.44E-02 | -32.40  | 21.28  | 1.28E-01 | -10.38  | 14.86 | 4.85E-01 | -17.89 | 13.88 | 1.97E-01 |
| cg20299572 | -14.06 | 4.80  | 3.40E-03 | -10.03 | 6.83  | 1.42E-01 | -16.05  | 10.78  | 1.36E-01 | -22.19  | 13.09 | 8.99E-02 | -17.03 | 11.58 | 1.42E-01 |
| cg25781595 | 30.64  | 10.46 | 3.41E-03 | 33.36  | 13.08 | 1.08E-02 | -46.28  | 58.64  | 4.30E-01 | 43.00   | 46.28 | 3.53E-01 | 30.90  | 19.86 | 1.20E-01 |
| cg13178198 | -19.62 | 6.70  | 3.41E-03 | -24.57 | 12.70 | 5.30E-02 | -11.74  | 16.45  | 4.76E-01 | -24.01  | 11.00 | 2.90E-02 | -10.41 | 15.61 | 5.05E-01 |
| cg11724493 | 24.86  | 8.49  | 3.41E-03 | 32.92  | 20.59 | 1.10E-01 | 15.04   | 61.08  | 8.05E-01 | 19.95   | 9.93  | 4.47E-02 | 55.05  | 30.04 | 6.68E-02 |
| cg22618402 | 23.70  | 8.10  | 3.41E-03 | 47.03  | 19.71 | 1.70E-02 | -4.29   | 47.67  | 9.28E-01 | 21.32   | 9.56  | 2.57E-02 | 7.05   | 27.70 | 7.99E-01 |
| cg04499648 | 20.41  | 6.97  | 3.41E-03 | 34.62  | 11.77 | 3.26E-03 | -1.91   | 16.47  | 9.08E-01 | 24.52   | 12.65 | 5.26E-02 | 15.43  | 11.32 | 1.73E-01 |
| cg20722590 | 17.14  | 5.85  | 3.42E-03 | 15.96  | 9.17  | 8.17E-02 | 11.47   | 10.79  | 2.88E-01 | 8.61    | 20.14 | 6.69E-01 | 30.59  | 12.67 | 1.58E-02 |
| cg22396632 | -65.16 | 22.26 | 3.42E-03 | -49.86 | 34.28 | 1.46E-01 | -99.96  | 125.87 | 4.27E-01 | -113.33 | 36.45 | 1.88E-03 | -18.54 | 43.09 | 6.67E-01 |
| cg16739342 | 31.89  | 10.89 | 3.42E-03 | 48.63  | 14.26 | 6.50E-04 | 42.59   | 33.41  | 2.02E-01 | 14.08   | 9.52  | 1.39E-01 | 43.76  | 25.29 | 8.36E-02 |
| cg08292485 | -6.28  | 2.15  | 3.43E-03 | -5.55  | 3.51  | 1.14E-01 | -5.90   | 4.40   | 1.80E-01 | -11.28  | 4.78  | 1.83E-02 | -2.83  | 4.98  | 5.69E-01 |
| cg17184165 | -15.45 | 5.28  | 3.43E-03 | -12.89 | 9.76  | 1.87E-01 | -11.82  | 12.27  | 3.36E-01 | -15.89  | 8.71  | 6.81E-02 | -23.63 | 13.43 | 7.85E-02 |
| cg14742211 | -15.29 | 5.22  | 3.43E-03 | -19.18 | 7.77  | 1.36E-02 | -18.94  | 12.22  | 1.21E-01 | -2.65   | 12.78 | 8.36E-01 | -13.71 | 11.72 | 2.42E-01 |
| cg21289015 | 12.68  | 4.34  | 3.44E-03 | 24.74  | 16.83 | 1.41E-01 | 52.55   | 45.52  | 2.48E-01 | 10.43   | 4.67  | 2.56E-02 | 24.77  | 17.11 | 1.48E-01 |
| cg02932355 | 15.24  | 5.21  | 3.44E-03 | 16.42  | 8.98  | 6.74E-02 | -4.72   | 24.32  | 8.46E-01 | 14.47   | 7.23  | 4.55E-02 | 24.43  | 16.52 | 1.39E-01 |
| cg25719102 | 28.57  | 9.76  | 3.44E-03 | 43.54  | 19.25 | 2.37E-02 | 32.51   | 20.08  | 1.05E-01 | 14.57   | 15.88 | 3.59E-01 | 32.52  | 27.26 | 2.33E-01 |
| cg20409298 | 25.97  | 8.88  | 3.44E-03 | 22.15  | 15.15 | 1.44E-01 | 21.61   | 15.46  | 1.62E-01 | 15.80   | 20.74 | 4.46E-01 | 58.04  | 23.41 | 1.32E-02 |
| cg18192919 | 23.15  | 7.91  | 3.44E-03 | 22.72  | 15.35 | 1.39E-01 | -2.45   | 26.78  | 9.27E-01 | 34.90   | 14.33 | 1.49E-02 | 19.54  | 13.53 | 1.49E-01 |
| cg15794873 | 10.28  | 3.51  | 3.44E-03 | 6.46   | 4.57  | 1.58E-01 | 5.30    | 8.59   | 5.37E-01 | 22.70   | 9.52  | 1.71E-02 | 15.48  | 7.45  | 3.77E-02 |
| cg00423871 | 18.47  | 6.31  | 3.44E-03 | 11.59  | 15.12 | 4.44E-01 | 31.20   | 19.39  | 1.08E-01 | 20.87   | 7.88  | 8.06E-03 | -3.48  | 22.71 | 8.78E-01 |
| cg14554491 | 12.47  | 4.26  | 3.45E-03 | 13.51  | 5.61  | 1.61E-02 | 5.94    | 12.22  | 6.27E-01 | 33.65   | 20.36 | 9.83E-02 | 9.62   | 8.39  | 2.52E-01 |
| cg04622775 | 54.42  | 18.61 | 3.45E-03 | 44.54  | 26.57 | 9.37E-02 | 105.82  | 61.02  | 8.29E-02 | 66.28   | 35.29 | 6.04E-02 | 31.12  | 49.95 | 5.33E-01 |
| cg21180599 | 16.15  | 5.52  | 3.46E-03 | 23.54  | 8.51  | 5.69E-03 | 11.78   | 15.47  | 4.47E-01 | 28.34   | 18.37 | 1.23E-01 | 6.02   | 9.19  | 5.12E-01 |
| cg06087619 | 14.00  | 4.79  | 3.47E-03 | 11.50  | 11.71 | 3.26E-01 | 4.05    | 16.66  | 8.08E-01 | 17.05   | 5.91  | 3.93E-03 | 5.90   | 15.67 | 7.07E-01 |

|            |        |       |          |        |       |          |         |        |          |        |       |          |        |       |          |
|------------|--------|-------|----------|--------|-------|----------|---------|--------|----------|--------|-------|----------|--------|-------|----------|
| cg08663298 | -12.90 | 4.41  | 3.47E-03 | -22.48 | 11.83 | 5.73E-02 | -8.58   | 18.33  | 6.40E-01 | -11.65 | 5.28  | 2.75E-02 | -10.92 | 13.66 | 4.24E-01 |
| cg06934774 | 20.55  | 7.03  | 3.47E-03 | 17.83  | 9.61  | 6.35E-02 | 32.45   | 20.72  | 1.17E-01 | -4.31  | 25.93 | 8.68E-01 | 27.52  | 13.40 | 4.00E-02 |
| cg17140992 | 16.90  | 5.78  | 3.48E-03 | 27.39  | 9.97  | 5.99E-03 | -2.77   | 17.85  | 8.77E-01 | 16.20  | 9.84  | 9.97E-02 | 11.14  | 12.52 | 3.74E-01 |
| cg01655607 | -35.47 | 12.14 | 3.48E-03 | -17.23 | 31.53 | 5.85E-01 | -53.71  | 123.45 | 6.64E-01 | -42.13 | 13.77 | 2.21E-03 | 5.70   | 47.89 | 9.05E-01 |
| cg23702848 | 13.70  | 4.69  | 3.48E-03 | 7.87   | 6.63  | 2.36E-01 | 22.81   | 10.03  | 2.30E-02 | 16.38  | 14.58 | 2.61E-01 | 17.39  | 11.14 | 1.19E-01 |
| cg18617770 | 32.31  | 11.06 | 3.48E-03 | 11.65  | 16.80 | 4.88E-01 | 33.53   | 21.66  | 1.22E-01 | 32.89  | 19.29 | 8.81E-02 | 67.66  | 24.22 | 5.22E-03 |
| cg01553182 | -11.31 | 3.87  | 3.49E-03 | -19.48 | 8.83  | 2.74E-02 | 6.94    | 15.19  | 6.48E-01 | -11.13 | 4.74  | 1.89E-02 | -7.77  | 14.06 | 5.81E-01 |
| cg08903587 | 39.82  | 13.63 | 3.49E-03 | 14.45  | 45.36 | 7.50E-01 | -48.19  | 179.18 | 7.88E-01 | 42.28  | 14.81 | 4.30E-03 | 52.43  | 57.31 | 3.60E-01 |
| cg16639880 | 22.67  | 7.76  | 3.49E-03 | 8.24   | 22.60 | 7.15E-01 | 80.54   | 47.22  | 8.81E-02 | 23.99  | 8.66  | 5.62E-03 | 5.10   | 33.89 | 8.80E-01 |
| cg16149919 | 10.81  | 3.70  | 3.49E-03 | 6.51   | 5.70  | 2.53E-01 | 8.35    | 7.26   | 2.50E-01 | 24.38  | 11.52 | 3.42E-02 | 15.66  | 7.97  | 4.94E-02 |
| cg06831361 | -23.54 | 8.06  | 3.51E-03 | -17.44 | 13.52 | 1.97E-01 | -25.43  | 18.82  | 1.77E-01 | -38.02 | 19.89 | 5.60E-02 | -21.65 | 14.80 | 1.43E-01 |
| cg27226927 | 11.67  | 4.00  | 3.51E-03 | 12.49  | 6.02  | 3.79E-02 | 17.55   | 6.93   | 1.14E-02 | 9.01   | 13.94 | 5.18E-01 | -2.87  | 10.51 | 7.85E-01 |
| cg17775490 | 9.71   | 3.33  | 3.51E-03 | 10.23  | 4.49  | 2.27E-02 | 6.92    | 9.18   | 4.51E-01 | 6.39   | 10.39 | 5.38E-01 | 11.63  | 7.13  | 1.03E-01 |
| cg14776894 | -16.75 | 5.74  | 3.51E-03 | -14.25 | 14.84 | 3.37E-01 | -1.26   | 24.70  | 9.59E-01 | -19.54 | 6.84  | 4.28E-03 | -8.62  | 18.86 | 6.48E-01 |
| cg14065881 | 17.95  | 6.15  | 3.51E-03 | 18.30  | 16.74 | 2.74E-01 | 5.90    | 18.41  | 7.48E-01 | 18.05  | 7.32  | 1.37E-02 | 43.55  | 28.03 | 1.20E-01 |
| cg17126947 | -9.36  | 3.21  | 3.52E-03 | -13.55 | 7.53  | 7.19E-02 | -10.53  | 10.01  | 2.93E-01 | -9.10  | 4.12  | 2.73E-02 | -2.82  | 9.66  | 7.70E-01 |
| cg00736299 | 7.90   | 2.71  | 3.52E-03 | 6.69   | 3.35  | 4.59E-02 | 11.65   | 6.07   | 5.50E-02 | 14.23  | 12.07 | 2.38E-01 | 5.10   | 8.60  | 5.53E-01 |
| cg21359335 | -56.22 | 19.27 | 3.52E-03 | -52.00 | 26.71 | 5.16E-02 | 2.94    | 64.25  | 9.63E-01 | -50.03 | 52.44 | 3.40E-01 | -88.99 | 38.17 | 1.97E-02 |
| cg20983312 | 44.28  | 15.18 | 3.52E-03 | 1.34   | 47.68 | 9.78E-01 | -156.91 | 182.66 | 3.90E-01 | 46.70  | 16.96 | 5.89E-03 | 86.27  | 50.39 | 8.69E-02 |
| cg01164291 | 27.04  | 9.27  | 3.53E-03 | 20.28  | 16.56 | 2.21E-01 | 26.67   | 18.33  | 1.46E-01 | 30.83  | 18.98 | 1.04E-01 | 33.81  | 21.09 | 1.09E-01 |
| cg27052709 | -14.02 | 4.81  | 3.53E-03 | -15.26 | 7.15  | 3.28E-02 | 1.95    | 11.31  | 8.63E-01 | -24.80 | 12.36 | 4.48E-02 | -17.22 | 10.32 | 9.52E-02 |
| cg00532474 | 9.78   | 3.35  | 3.53E-03 | 11.61  | 4.97  | 1.94E-02 | 10.19   | 7.55   | 1.77E-01 | 8.69   | 9.62  | 3.66E-01 | 6.32   | 7.06  | 3.70E-01 |
| cg07108118 | -16.44 | 5.63  | 3.53E-03 | -12.47 | 16.12 | 4.39E-01 | 5.63    | 34.23  | 8.69E-01 | -15.77 | 6.40  | 1.38E-02 | -37.17 | 20.29 | 6.69E-02 |
| cg18740810 | -13.87 | 4.75  | 3.53E-03 | -18.12 | 9.42  | 5.44E-02 | -4.05   | 14.55  | 7.81E-01 | -17.58 | 5.91  | 2.92E-03 | 8.40   | 15.36 | 5.84E-01 |
| cg16092370 | -15.86 | 5.44  | 3.53E-03 | -27.14 | 14.09 | 5.42E-02 | 11.40   | 24.56  | 6.43E-01 | -16.10 | 6.33  | 1.10E-02 | -7.77  | 21.59 | 7.19E-01 |
| cg16361840 | 50.91  | 17.45 | 3.54E-03 | -35.18 | 64.92 | 5.88E-01 | 113.28  | 289.41 | 6.95E-01 | 60.68  | 18.93 | 1.35E-03 | 19.63  | 64.18 | 7.60E-01 |
| cg05620762 | -17.34 | 5.95  | 3.54E-03 | -13.97 | 11.07 | 2.07E-01 | -20.40  | 27.96  | 4.66E-01 | -20.26 | 7.90  | 1.03E-02 | -9.07  | 18.87 | 6.31E-01 |
| cg08418076 | -18.19 | 6.24  | 3.54E-03 | -16.98 | 15.52 | 2.74E-01 | -5.02   | 34.18  | 8.83E-01 | -16.50 | 7.43  | 2.63E-02 | -36.56 | 19.77 | 6.45E-02 |
| cg00924004 | 19.96  | 6.84  | 3.55E-03 | 32.84  | 23.02 | 1.54E-01 | 16.28   | 60.03  | 7.86E-01 | 16.53  | 7.44  | 2.64E-02 | 54.33  | 29.81 | 6.84E-02 |
| cg07658508 | 7.37   | 2.53  | 3.55E-03 | 5.36   | 3.61  | 1.37E-01 | 11.24   | 4.63   | 1.53E-02 | 6.51   | 9.06  | 4.72E-01 | 6.63   | 6.92  | 3.38E-01 |
| cg20980960 | 45.16  | 15.49 | 3.55E-03 | 61.92  | 23.95 | 9.72E-03 | 90.57   | 50.81  | 7.47E-02 | 21.90  | 38.33 | 5.68E-01 | 22.32  | 27.14 | 4.11E-01 |
| cg18056695 | 13.84  | 4.75  | 3.55E-03 | 20.31  | 6.98  | 3.59E-03 | 10.76   | 13.64  | 4.30E-01 | 18.47  | 14.64 | 2.07E-01 | 3.82   | 8.53  | 6.54E-01 |
| cg14193339 | 42.25  | 14.49 | 3.56E-03 | 30.23  | 32.26 | 3.49E-01 | 55.46   | 119.44 | 6.42E-01 | 54.00  | 12.18 | 9.31E-06 | -31.61 | 47.30 | 5.04E-01 |
| cg12815974 | -59.02 | 20.25 | 3.56E-03 | -47.50 | 70.99 | 5.03E-01 | -105.57 | 264.78 | 6.90E-01 | -68.06 | 22.73 | 2.76E-03 | -4.48  | 58.65 | 9.39E-01 |
| cg07030704 | -8.42  | 2.89  | 3.56E-03 | -11.83 | 5.33  | 2.66E-02 | -9.57   | 7.81   | 2.20E-01 | -5.93  | 4.70  | 2.07E-01 | -7.29  | 6.60  | 2.69E-01 |

|            |        |       |          |        |       |          |        |        |          |        |       |          |        |       |          |
|------------|--------|-------|----------|--------|-------|----------|--------|--------|----------|--------|-------|----------|--------|-------|----------|
| cg20462449 | -34.88 | 11.97 | 3.56E-03 | -26.78 | 16.30 | 1.00E-01 | 9.12   | 39.67  | 8.18E-01 | -69.87 | 30.96 | 2.40E-02 | -47.81 | 24.49 | 5.09E-02 |
| cg10514770 | 10.04  | 3.44  | 3.56E-03 | 8.19   | 5.36  | 1.26E-01 | 9.45   | 7.39   | 2.01E-01 | 13.14  | 9.23  | 1.54E-01 | 12.03  | 7.18  | 9.38E-02 |
| cg08607221 | 21.32  | 7.32  | 3.57E-03 | 17.68  | 22.95 | 4.41E-01 | 56.65  | 29.97  | 5.87E-02 | 14.46  | 10.28 | 1.59E-01 | 26.55  | 12.69 | 3.65E-02 |
| cg19314777 | -14.43 | 4.95  | 3.57E-03 | -23.85 | 11.52 | 3.84E-02 | -3.28  | 18.85  | 8.62E-01 | -12.22 | 6.11  | 4.55E-02 | -19.81 | 16.59 | 2.32E-01 |
| cg11365360 | 39.62  | 13.60 | 3.57E-03 | 42.95  | 16.99 | 1.15E-02 | 23.93  | 40.62  | 5.56E-01 | 20.34  | 54.67 | 7.10E-01 | 44.03  | 31.60 | 1.64E-01 |
| cg25315819 | -10.63 | 3.65  | 3.57E-03 | -15.53 | 8.06  | 5.39E-02 | -12.31 | 18.68  | 5.10E-01 | -10.37 | 4.55  | 2.26E-02 | -2.68  | 10.80 | 8.04E-01 |
| cg10550882 | 20.05  | 6.88  | 3.58E-03 | 16.54  | 7.13  | 2.05E-02 | 46.37  | 20.43  | 2.32E-02 | 32.97  | 14.47 | 2.27E-02 | 6.11   | 12.10 | 6.13E-01 |
| cg01641908 | 11.63  | 3.99  | 3.58E-03 | 9.27   | 9.05  | 3.05E-01 | 23.76  | 12.28  | 5.29E-02 | 12.25  | 5.24  | 1.94E-02 | 1.66   | 11.61 | 8.86E-01 |
| cg05406868 | 21.10  | 7.24  | 3.58E-03 | 25.05  | 10.98 | 2.25E-02 | 22.01  | 23.24  | 3.44E-01 | 6.74   | 21.25 | 7.51E-01 | 20.69  | 12.22 | 9.04E-02 |
| cg23422763 | -8.18  | 2.81  | 3.59E-03 | -9.31  | 5.43  | 8.64E-02 | -8.35  | 6.21   | 1.79E-01 | -4.94  | 4.44  | 2.66E-01 | -15.58 | 7.82  | 4.63E-02 |
| cg09446896 | 16.66  | 5.72  | 3.60E-03 | 21.17  | 13.96 | 1.29E-01 | 31.11  | 17.29  | 7.19E-02 | 15.36  | 7.09  | 3.02E-02 | -4.46  | 21.46 | 8.35E-01 |
| cg14074351 | 31.28  | 10.74 | 3.60E-03 | 53.28  | 21.45 | 1.30E-02 | 23.11  | 14.03  | 9.95E-02 | 20.51  | 58.68 | 7.27E-01 | 28.41  | 29.94 | 3.43E-01 |
| cg05816298 | 33.82  | 11.62 | 3.60E-03 | 40.58  | 27.07 | 1.34E-01 | 16.14  | 52.49  | 7.59E-01 | 33.27  | 14.36 | 2.05E-02 | 33.61  | 34.68 | 3.33E-01 |
| cg06996273 | -8.03  | 2.76  | 3.61E-03 | -9.16  | 4.22  | 3.01E-02 | -8.75  | 6.73   | 1.94E-01 | -17.33 | 8.20  | 3.45E-02 | -2.36  | 5.11  | 6.45E-01 |
| cg00663068 | -31.81 | 10.93 | 3.62E-03 | -38.15 | 15.23 | 1.23E-02 | 6.49   | 57.54  | 9.10E-01 | -42.79 | 22.40 | 5.61E-02 | -10.49 | 23.80 | 6.59E-01 |
| cg07255158 | -56.96 | 19.57 | 3.62E-03 | -71.93 | 26.29 | 6.22E-03 | 25.36  | 88.36  | 7.74E-01 | -53.72 | 53.39 | 3.14E-01 | -42.35 | 38.23 | 2.68E-01 |
| cg09110388 | 18.58  | 6.39  | 3.62E-03 | 21.17  | 10.29 | 3.96E-02 | 9.53   | 11.95  | 4.25E-01 | 28.90  | 15.42 | 6.09E-02 | 17.41  | 16.08 | 2.79E-01 |
| cg12738763 | 3.85   | 1.32  | 3.62E-03 | 3.76   | 1.89  | 4.68E-02 | 3.69   | 2.77   | 1.83E-01 | -1.31  | 4.68  | 7.80E-01 | 6.27   | 2.94  | 3.27E-02 |
| cg11993720 | 51.92  | 17.85 | 3.62E-03 | 83.76  | 59.61 | 1.60E-01 | 78.05  | 203.59 | 7.01E-01 | 52.93  | 19.76 | 7.40E-03 | 7.49   | 60.40 | 9.01E-01 |
| cg19594360 | 35.08  | 12.06 | 3.63E-03 | 47.30  | 37.66 | 2.09E-01 | -50.26 | 162.36 | 7.57E-01 | 32.78  | 13.15 | 1.26E-02 | 58.08  | 53.85 | 2.81E-01 |
| cg03818193 | -25.54 | 8.78  | 3.63E-03 | -25.74 | 16.98 | 1.29E-01 | -4.37  | 40.02  | 9.13E-01 | -27.81 | 11.70 | 1.75E-02 | -22.96 | 25.19 | 3.62E-01 |
| cg07084019 | -16.81 | 5.78  | 3.63E-03 | -32.92 | 15.66 | 3.55E-02 | -23.79 | 17.70  | 1.79E-01 | -10.49 | 7.06  | 1.37E-01 | -31.58 | 19.55 | 1.06E-01 |
| cg16347858 | 49.21  | 16.92 | 3.64E-03 | 49.24  | 24.18 | 4.17E-02 | 18.70  | 56.51  | 7.41E-01 | 81.69  | 40.52 | 4.38E-02 | 37.25  | 34.10 | 2.75E-01 |
| cg02807446 | -16.34 | 5.62  | 3.64E-03 | -8.10  | 11.45 | 4.79E-01 | -0.78  | 16.31  | 9.62E-01 | -20.37 | 7.73  | 8.44E-03 | -31.67 | 16.82 | 5.97E-02 |
| cg01869288 | -18.56 | 6.38  | 3.64E-03 | -29.60 | 8.95  | 9.38E-04 | -5.23  | 14.62  | 7.20E-01 | -6.30  | 13.07 | 6.30E-01 | -20.29 | 15.54 | 1.92E-01 |
| cg20192747 | 13.10  | 4.51  | 3.64E-03 | 15.49  | 6.76  | 2.20E-02 | 11.55  | 10.92  | 2.90E-01 | 21.37  | 13.28 | 1.08E-01 | 6.63   | 8.67  | 4.44E-01 |
| cg27260772 | 13.12  | 4.51  | 3.65E-03 | 21.89  | 12.17 | 7.22E-02 | 7.77   | 33.16  | 8.15E-01 | 13.86  | 5.45  | 1.10E-02 | 2.97   | 11.31 | 7.93E-01 |
| cg13674249 | -11.39 | 3.92  | 3.65E-03 | -2.84  | 8.97  | 7.51E-01 | -17.12 | 13.47  | 2.04E-01 | -11.50 | 4.97  | 2.08E-02 | -21.66 | 12.12 | 7.38E-02 |
| cg23881697 | 28.13  | 9.68  | 3.66E-03 | 31.43  | 18.65 | 9.19E-02 | 20.98  | 17.54  | 2.32E-01 | 22.44  | 20.31 | 2.69E-01 | 41.09  | 21.69 | 5.82E-02 |
| cg08148697 | 28.68  | 9.87  | 3.66E-03 | 43.46  | 17.85 | 1.49E-02 | 6.77   | 18.40  | 7.13E-01 | 28.82  | 18.50 | 1.19E-01 | 42.97  | 28.24 | 1.28E-01 |
| cg20960277 | -30.77 | 10.59 | 3.66E-03 | -25.66 | 14.61 | 7.91E-02 | 0.32   | 33.20  | 9.92E-01 | -33.81 | 23.24 | 1.46E-01 | -62.36 | 26.05 | 1.67E-02 |
| cg00885918 | 22.62  | 7.79  | 3.66E-03 | 26.20  | 12.25 | 3.24E-02 | 17.15  | 15.84  | 2.79E-01 | 23.20  | 17.31 | 1.80E-01 | 21.05  | 19.96 | 2.92E-01 |
| cg14438812 | -14.93 | 5.14  | 3.67E-03 | -15.21 | 8.56  | 7.55E-02 | -15.87 | 11.23  | 1.58E-01 | -13.62 | 11.33 | 2.30E-01 | -14.79 | 10.83 | 1.72E-01 |
| cg22204103 | 12.42  | 4.28  | 3.68E-03 | 12.59  | 6.01  | 3.62E-02 | 6.65   | 10.07  | 5.09E-01 | 21.62  | 11.13 | 5.20E-02 | 10.00  | 10.51 | 3.42E-01 |
| cg13518195 | 51.78  | 17.83 | 3.68E-03 | 46.57  | 25.54 | 6.82E-02 | 20.39  | 69.07  | 7.68E-01 | 125.44 | 54.71 | 2.19E-02 | 42.39  | 30.59 | 1.66E-01 |

|            |        |       |          |         |       |          |         |        |          |         |       |          |        |       |          |
|------------|--------|-------|----------|---------|-------|----------|---------|--------|----------|---------|-------|----------|--------|-------|----------|
| cg04237482 | 22.65  | 7.80  | 3.68E-03 | 25.64   | 13.93 | 6.56E-02 | 11.04   | 28.07  | 6.94E-01 | 23.66   | 11.31 | 3.64E-02 | 18.72  | 21.32 | 3.80E-01 |
| cg07628073 | -31.19 | 10.74 | 3.68E-03 | -25.07  | 16.51 | 1.29E-01 | -2.80   | 50.04  | 9.55E-01 | -27.48  | 22.62 | 2.24E-01 | -46.71 | 19.44 | 1.63E-02 |
| cg13246426 | 15.72  | 5.41  | 3.68E-03 | 10.03   | 11.04 | 3.64E-01 | 9.27    | 11.24  | 4.09E-01 | 19.65   | 8.55  | 2.15E-02 | 25.86  | 15.20 | 8.89E-02 |
| cg04594378 | -17.74 | 6.11  | 3.69E-03 | -20.74  | 9.42  | 2.76E-02 | -12.52  | 14.34  | 3.83E-01 | -6.83   | 13.87 | 6.23E-01 | -26.60 | 13.55 | 4.96E-02 |
| cg22402853 | -26.11 | 9.00  | 3.70E-03 | -77.11  | 39.28 | 4.96E-02 | -115.95 | 147.43 | 4.32E-01 | -23.48  | 9.54  | 1.38E-02 | -13.60 | 38.89 | 7.26E-01 |
| cg04257865 | -12.75 | 4.39  | 3.71E-03 | -16.55  | 11.45 | 1.48E-01 | -4.82   | 12.84  | 7.08E-01 | -13.57  | 5.45  | 1.28E-02 | -10.84 | 14.91 | 4.67E-01 |
| cg22985281 | -19.25 | 6.63  | 3.71E-03 | -34.96  | 14.08 | 1.30E-02 | 6.98    | 29.93  | 8.16E-01 | -14.43  | 8.50  | 8.96E-02 | -25.42 | 19.17 | 1.85E-01 |
| cg17382990 | -36.07 | 12.43 | 3.71E-03 | -45.95  | 21.43 | 3.21E-02 | 25.53   | 56.31  | 6.50E-01 | -48.95  | 24.84 | 4.88E-02 | -26.34 | 20.58 | 2.01E-01 |
| cg03287432 | 8.46   | 2.92  | 3.72E-03 | 10.51   | 4.70  | 2.53E-02 | 4.55    | 6.30   | 4.70E-01 | 10.16   | 6.26  | 1.05E-01 | 6.72   | 6.79  | 3.23E-01 |
| cg21032150 | 13.69  | 4.72  | 3.72E-03 | 24.00   | 12.08 | 4.70E-02 | -10.69  | 33.07  | 7.47E-01 | 13.19   | 5.39  | 1.44E-02 | 2.28   | 19.11 | 9.05E-01 |
| cg13524563 | 41.62  | 14.35 | 3.72E-03 | 34.71   | 19.42 | 7.39E-02 | -12.87  | 65.44  | 8.44E-01 | 33.37   | 38.58 | 3.87E-01 | 69.75  | 27.73 | 1.19E-02 |
| cg02313495 | -4.33  | 1.49  | 3.73E-03 | -4.44   | 1.99  | 2.55E-02 | -2.55   | 3.47   | 4.62E-01 | -6.24   | 5.30  | 2.38E-01 | -5.03  | 3.63  | 1.66E-01 |
| cg21665905 | -13.55 | 4.67  | 3.73E-03 | -18.33  | 8.61  | 3.32E-02 | -2.39   | 10.61  | 8.22E-01 | -12.59  | 7.49  | 9.31E-02 | -22.77 | 13.34 | 8.78E-02 |
| cg22825220 | -13.44 | 4.64  | 3.74E-03 | -17.90  | 9.44  | 5.79E-02 | -2.70   | 15.38  | 8.61E-01 | -13.29  | 6.19  | 3.19E-02 | -13.35 | 14.18 | 3.46E-01 |
| cg19675599 | -11.58 | 4.00  | 3.74E-03 | -23.36  | 11.05 | 3.45E-02 | 0.65    | 24.32  | 9.79E-01 | -9.75   | 4.65  | 3.60E-02 | -13.04 | 12.47 | 2.96E-01 |
| cg19193136 | 10.85  | 3.74  | 3.75E-03 | 9.54    | 4.89  | 5.08E-02 | 24.47   | 10.34  | 1.79E-02 | -0.55   | 12.90 | 9.66E-01 | 10.54  | 8.41  | 2.10E-01 |
| cg10242089 | 29.19  | 10.07 | 3.75E-03 | 34.66   | 23.69 | 1.43E-01 | -5.93   | 89.76  | 9.47E-01 | 32.01   | 11.82 | 6.78E-03 | -2.88  | 35.44 | 9.35E-01 |
| cg17721897 | -77.08 | 26.60 | 3.75E-03 | -87.11  | 36.87 | 1.81E-02 | 141.09  | 136.71 | 3.02E-01 | -102.91 | 58.11 | 7.66E-02 | -66.89 | 55.18 | 2.25E-01 |
| cg17559156 | 29.42  | 10.15 | 3.76E-03 | 24.44   | 20.56 | 2.34E-01 | -2.99   | 48.23  | 9.51E-01 | 26.82   | 12.93 | 3.80E-02 | 74.26  | 32.97 | 2.43E-02 |
| cg21477508 | 39.30  | 13.56 | 3.76E-03 | 41.86   | 18.24 | 2.18E-02 | 49.18   | 59.71  | 4.10E-01 | 46.76   | 57.72 | 4.18E-01 | 32.42  | 23.24 | 1.63E-01 |
| cg18669966 | 41.47  | 14.32 | 3.77E-03 | 36.77   | 16.99 | 3.04E-02 | 13.61   | 74.86  | 8.56E-01 | 70.80   | 65.24 | 2.78E-01 | 55.85  | 31.62 | 7.74E-02 |
| cg17383853 | -11.57 | 3.99  | 3.77E-03 | -14.41  | 6.25  | 2.11E-02 | -10.62  | 9.87   | 2.82E-01 | -9.47   | 8.59  | 2.70E-01 | -8.97  | 8.69  | 3.02E-01 |
| cg19224278 | 17.27  | 5.96  | 3.78E-03 | 13.21   | 8.93  | 1.39E-01 | 22.59   | 17.50  | 1.97E-01 | 34.71   | 17.79 | 5.10E-02 | 14.91  | 10.44 | 1.53E-01 |
| cg04718853 | 21.99  | 7.59  | 3.78E-03 | 26.55   | 12.37 | 3.19E-02 | 33.32   | 12.74  | 8.94E-03 | -4.33   | 17.52 | 8.05E-01 | 18.66  | 18.78 | 3.20E-01 |
| cg05228379 | -38.33 | 13.23 | 3.78E-03 | 14.72   | 41.02 | 7.20E-01 | -123.84 | 213.94 | 5.63E-01 | -43.06  | 14.59 | 3.16E-03 | -57.15 | 50.34 | 2.56E-01 |
| cg00310410 | -8.18  | 2.83  | 3.78E-03 | -6.46   | 5.12  | 2.07E-01 | -6.57   | 6.71   | 3.27E-01 | -9.48   | 4.85  | 5.07E-02 | -10.24 | 6.68  | 1.25E-01 |
| cg03939566 | -24.78 | 8.56  | 3.79E-03 | -10.89  | 22.24 | 6.24E-01 | -40.02  | 53.08  | 4.51E-01 | -26.59  | 9.83  | 6.86E-03 | -29.09 | 32.77 | 3.75E-01 |
| cg04360780 | -56.42 | 19.49 | 3.80E-03 | -135.17 | 53.77 | 1.19E-02 | -10.58  | 248.78 | 9.66E-01 | -40.04  | 23.49 | 8.83E-02 | -63.41 | 46.73 | 1.75E-01 |
| cg15422307 | -15.41 | 5.32  | 3.80E-03 | -21.22  | 10.70 | 4.73E-02 | -12.49  | 14.38  | 3.85E-01 | -13.44  | 7.91  | 8.93E-02 | -14.51 | 13.21 | 2.72E-01 |
| cg00751937 | 31.61  | 10.92 | 3.80E-03 | 34.98   | 34.18 | 3.06E-01 | 8.36    | 137.40 | 9.51E-01 | 29.91   | 11.86 | 1.16E-02 | 60.32  | 52.51 | 2.51E-01 |
| cg25122252 | 38.43  | 13.28 | 3.80E-03 | 23.31   | 42.91 | 5.87E-01 | -11.95  | 159.60 | 9.40E-01 | 42.48   | 14.67 | 3.79E-03 | 19.10  | 47.35 | 6.87E-01 |
| cg25367999 | -11.91 | 4.12  | 3.81E-03 | -24.98  | 9.14  | 6.25E-03 | -10.10  | 15.03  | 5.02E-01 | -7.16   | 4.89  | 1.44E-01 | -16.18 | 11.81 | 1.71E-01 |
| cg23685965 | 13.83  | 4.78  | 3.81E-03 | 12.11   | 7.29  | 9.64E-02 | 15.70   | 12.88  | 2.23E-01 | 14.85   | 10.93 | 1.75E-01 | 15.01  | 9.73  | 1.23E-01 |
| cg06629775 | 65.00  | 22.47 | 3.82E-03 | 57.37   | 26.70 | 3.17E-02 | 150.57  | 175.93 | 3.92E-01 | 162.50  | 89.25 | 6.86E-02 | 54.77  | 48.80 | 2.62E-01 |
| cg27141863 | -52.29 | 18.08 | 3.82E-03 | -79.73  | 61.99 | 1.98E-01 | 27.31   | 243.55 | 9.11E-01 | -50.21  | 19.71 | 1.09E-02 | -50.17 | 69.12 | 4.68E-01 |

|            |        |       |          |        |       |          |         |        |          |        |       |          |        |       |          |
|------------|--------|-------|----------|--------|-------|----------|---------|--------|----------|--------|-------|----------|--------|-------|----------|
| cg02962406 | -29.79 | 10.30 | 3.82E-03 | -25.66 | 10.00 | 1.03E-02 | 8.17    | 23.18  | 7.24E-01 | -54.42 | 22.71 | 1.66E-02 | -42.78 | 14.96 | 4.23E-03 |
| cg03727673 | -19.78 | 6.84  | 3.82E-03 | -33.30 | 15.33 | 2.98E-02 | -19.65  | 17.93  | 2.73E-01 | -17.94 | 9.42  | 5.69E-02 | -6.54  | 19.05 | 7.31E-01 |
| cg21386611 | 23.33  | 8.07  | 3.83E-03 | 40.28  | 19.32 | 3.71E-02 | -16.52  | 46.29  | 7.21E-01 | 21.65  | 9.56  | 2.36E-02 | 16.78  | 27.75 | 5.45E-01 |
| cg07962812 | -40.92 | 14.15 | 3.83E-03 | -8.67  | 41.90 | 8.36E-01 | -194.61 | 219.42 | 3.75E-01 | -44.80 | 15.67 | 4.26E-03 | -39.02 | 54.90 | 4.77E-01 |
| cg18384106 | 15.94  | 5.51  | 3.84E-03 | 18.83  | 14.77 | 2.02E-01 | 9.56    | 20.11  | 6.34E-01 | 14.79  | 6.76  | 2.87E-02 | 22.88  | 15.86 | 1.49E-01 |
| cg21179654 | -14.64 | 5.06  | 3.84E-03 | -24.03 | 7.90  | 2.33E-03 | -7.46   | 11.11  | 5.02E-01 | -1.81  | 11.11 | 8.71E-01 | -16.61 | 10.15 | 1.02E-01 |
| cg09939344 | -37.30 | 12.90 | 3.84E-03 | -46.96 | 20.27 | 2.05E-02 | -3.97   | 37.53  | 9.16E-01 | -42.22 | 27.05 | 1.19E-01 | -32.91 | 25.87 | 2.03E-01 |
| cg18793463 | 23.30  | 8.06  | 3.85E-03 | 33.53  | 22.51 | 1.36E-01 | -25.71  | 34.69  | 4.58E-01 | 22.65  | 9.29  | 1.47E-02 | 51.49  | 31.73 | 1.05E-01 |
| cg24348479 | 15.61  | 5.40  | 3.85E-03 | 19.96  | 10.23 | 5.10E-02 | 6.78    | 14.26  | 6.34E-01 | 11.05  | 7.96  | 1.65E-01 | 34.01  | 15.78 | 3.11E-02 |
| cg23621912 | -9.85  | 3.41  | 3.85E-03 | -12.91 | 6.38  | 4.28E-02 | 4.30    | 9.68   | 6.57E-01 | -12.84 | 5.01  | 1.04E-02 | -5.91  | 9.51  | 5.34E-01 |
| cg00374492 | 43.38  | 15.01 | 3.85E-03 | 31.44  | 18.44 | 8.82E-02 | 64.94   | 66.25  | 3.27E-01 | 55.20  | 61.23 | 3.67E-01 | 70.30  | 31.55 | 2.59E-02 |
| cg26985142 | -48.61 | 16.82 | 3.85E-03 | -70.64 | 51.28 | 1.68E-01 | 167.97  | 220.56 | 4.46E-01 | -46.17 | 18.64 | 1.32E-02 | -60.71 | 62.53 | 3.32E-01 |
| cg12762432 | 39.16  | 13.55 | 3.85E-03 | 57.61  | 48.90 | 2.39E-01 | -32.24  | 184.17 | 8.61E-01 | 33.21  | 14.82 | 2.50E-02 | 87.52  | 47.47 | 6.52E-02 |
| cg04436971 | 19.36  | 6.70  | 3.85E-03 | 23.23  | 10.55 | 2.76E-02 | 18.82   | 12.86  | 1.43E-01 | 2.51   | 16.93 | 8.82E-01 | 26.63  | 16.32 | 1.03E-01 |
| cg23093116 | 12.74  | 4.41  | 3.85E-03 | 12.71  | 12.04 | 2.91E-01 | 9.50    | 21.89  | 6.64E-01 | 15.56  | 5.36  | 3.67E-03 | 0.74   | 11.47 | 9.49E-01 |
| cg11240634 | 32.95  | 11.40 | 3.86E-03 | 33.21  | 14.73 | 2.42E-02 | 84.20   | 46.87  | 7.24E-02 | 39.35  | 28.27 | 1.64E-01 | 9.34   | 26.95 | 7.29E-01 |
| cg07813851 | -15.61 | 5.40  | 3.86E-03 | -25.56 | 13.80 | 6.39E-02 | -11.70  | 20.76  | 5.73E-01 | -11.41 | 6.63  | 8.52E-02 | -28.95 | 15.96 | 6.97E-02 |
| cg00332212 | 34.93  | 12.09 | 3.87E-03 | 3.37   | 32.62 | 9.18E-01 | 59.43   | 97.99  | 5.44E-01 | 42.85  | 13.95 | 2.13E-03 | 14.15  | 39.04 | 7.17E-01 |
| cg02477175 | -54.04 | 18.71 | 3.88E-03 | -45.26 | 42.50 | 2.87E-01 | -227.09 | 228.93 | 3.21E-01 | -63.43 | 22.71 | 5.23E-03 | -5.75  | 53.89 | 9.15E-01 |
| cg11621104 | 39.53  | 13.69 | 3.88E-03 | 46.97  | 18.50 | 1.11E-02 | 70.82   | 42.10  | 9.25E-02 | 20.73  | 49.86 | 6.78E-01 | 17.56  | 26.27 | 5.04E-01 |
| cg24283621 | 30.40  | 10.53 | 3.89E-03 | 34.54  | 44.31 | 4.36E-01 | 14.22   | 66.23  | 8.30E-01 | 29.51  | 11.35 | 9.30E-03 | 46.98  | 44.15 | 2.87E-01 |
| cg04704887 | 19.13  | 6.63  | 3.90E-03 | 25.98  | 19.31 | 1.78E-01 | 23.51   | 19.41  | 2.26E-01 | 16.72  | 7.98  | 3.63E-02 | 23.57  | 23.90 | 3.24E-01 |
| cg12154110 | 22.29  | 7.72  | 3.90E-03 | 20.31  | 12.94 | 1.16E-01 | 23.79   | 13.85  | 8.59E-02 | 21.14  | 18.74 | 2.59E-01 | 24.93  | 19.11 | 1.92E-01 |
| cg02459543 | -15.28 | 5.29  | 3.90E-03 | -18.13 | 11.68 | 1.21E-01 | -1.56   | 21.85  | 9.43E-01 | -13.81 | 6.62  | 3.69E-02 | -27.19 | 17.02 | 1.10E-01 |
| cg10946573 | -13.46 | 4.66  | 3.90E-03 | -19.82 | 7.08  | 5.09E-03 | -5.26   | 10.55  | 6.18E-01 | -18.07 | 5.04  | 3.38E-04 | 2.85   | 10.96 | 7.95E-01 |
| cg11723801 | 10.84  | 3.75  | 3.91E-03 | 18.95  | 7.42  | 1.06E-02 | 3.19    | 10.52  | 7.62E-01 | 11.59  | 6.18  | 6.09E-02 | 5.25   | 7.55  | 4.86E-01 |
| cg15001618 | 24.16  | 8.37  | 3.91E-03 | 31.73  | 16.28 | 5.13E-02 | 17.79   | 16.64  | 2.85E-01 | 24.23  | 14.03 | 8.41E-02 | 20.86  | 23.57 | 3.76E-01 |
| cg03797537 | 17.49  | 6.06  | 3.91E-03 | 14.97  | 14.89 | 3.15E-01 | 42.02   | 21.36  | 4.92E-02 | 16.23  | 7.29  | 2.60E-02 | 6.49   | 24.30 | 7.89E-01 |
| cg20792735 | 26.55  | 9.20  | 3.91E-03 | 48.31  | 27.55 | 7.95E-02 | -14.31  | 63.40  | 8.21E-01 | 24.86  | 10.80 | 2.14E-02 | 24.16  | 24.48 | 3.24E-01 |
| cg08751997 | -17.72 | 6.14  | 3.92E-03 | -5.72  | 11.85 | 6.29E-01 | -36.75  | 28.54  | 1.98E-01 | -23.90 | 8.22  | 3.62E-03 | -8.88  | 17.29 | 6.08E-01 |
| cg08293002 | 18.51  | 6.42  | 3.92E-03 | 7.94   | 14.90 | 5.94E-01 | 0.94    | 31.83  | 9.76E-01 | 18.94  | 7.45  | 1.10E-02 | 57.18  | 26.00 | 2.79E-02 |
| cg09442613 | -15.13 | 5.25  | 3.92E-03 | -18.97 | 12.17 | 1.19E-01 | -4.74   | 13.16  | 7.19E-01 | -15.48 | 7.48  | 3.87E-02 | -19.82 | 12.95 | 1.26E-01 |
| cg10337290 | -31.47 | 10.91 | 3.92E-03 | -53.84 | 17.76 | 2.43E-03 | -9.65   | 37.84  | 7.99E-01 | -14.66 | 20.80 | 4.81E-01 | -23.88 | 21.23 | 2.61E-01 |
| cg03189871 | -24.72 | 8.57  | 3.92E-03 | -20.78 | 18.01 | 2.49E-01 | -44.05  | 51.79  | 3.95E-01 | -23.50 | 10.53 | 2.56E-02 | -38.71 | 29.66 | 1.92E-01 |
| cg14406134 | -13.51 | 4.68  | 3.92E-03 | -18.26 | 7.01  | 9.17E-03 | -6.42   | 12.78  | 6.15E-01 | -7.88  | 11.43 | 4.91E-01 | -12.62 | 9.36  | 1.77E-01 |

|            |        |       |          |        |       |          |        |        |          |        |       |          |        |       |          |
|------------|--------|-------|----------|--------|-------|----------|--------|--------|----------|--------|-------|----------|--------|-------|----------|
| cg06690831 | -10.27 | 3.56  | 3.92E-03 | -7.42  | 8.15  | 3.63E-01 | -18.73 | 12.40  | 1.31E-01 | -11.80 | 4.59  | 1.00E-02 | -1.56  | 10.10 | 8.77E-01 |
| cg04125765 | -21.64 | 7.51  | 3.94E-03 | -20.55 | 10.90 | 5.94E-02 | -8.99  | 16.20  | 5.79E-01 | -32.82 | 19.31 | 8.92E-02 | -31.33 | 18.78 | 9.53E-02 |
| cg12130725 | -12.92 | 4.48  | 3.94E-03 | -5.81  | 10.67 | 5.86E-01 | -6.86  | 16.35  | 6.75E-01 | -16.63 | 5.48  | 2.39E-03 | -3.07  | 15.99 | 8.48E-01 |
| cg05672327 | 20.08  | 6.97  | 3.94E-03 | 38.08  | 18.17 | 3.61E-02 | 10.27  | 19.47  | 5.98E-01 | 17.35  | 8.66  | 4.52E-02 | 24.95  | 24.91 | 3.17E-01 |
| cg26637898 | 23.51  | 8.16  | 3.95E-03 | 31.73  | 20.94 | 1.30E-01 | 39.89  | 24.08  | 9.76E-02 | 15.42  | 10.03 | 1.24E-01 | 54.25  | 30.34 | 7.38E-02 |
| cg01467419 | 26.81  | 9.30  | 3.95E-03 | 31.83  | 11.54 | 5.83E-03 | 23.18  | 31.40  | 4.60E-01 | -21.07 | 30.73 | 4.93E-01 | 35.25  | 22.47 | 1.17E-01 |
| cg16202736 | -18.55 | 6.44  | 3.96E-03 | 1.41   | 20.43 | 9.45E-01 | -5.25  | 44.20  | 9.05E-01 | -20.85 | 7.12  | 3.39E-03 | -24.92 | 26.12 | 3.40E-01 |
| cg14392066 | 24.44  | 8.48  | 3.96E-03 | 14.34  | 17.25 | 4.06E-01 | 8.67   | 38.37  | 8.21E-01 | 32.33  | 10.89 | 2.98E-03 | 8.99   | 26.57 | 7.35E-01 |
| cg19323958 | -15.66 | 5.44  | 3.97E-03 | -24.93 | 8.88  | 5.02E-03 | -2.83  | 12.63  | 8.23E-01 | -13.96 | 13.47 | 3.00E-01 | -12.72 | 10.31 | 2.17E-01 |
| cg18716979 | 24.67  | 8.56  | 3.97E-03 | 44.97  | 18.30 | 1.40E-02 | 12.02  | 25.77  | 6.41E-01 | 17.06  | 12.57 | 1.75E-01 | 26.99  | 18.83 | 1.52E-01 |
| cg21762523 | 31.15  | 10.82 | 3.97E-03 | 20.08  | 25.19 | 4.25E-01 | 17.51  | 50.30  | 7.28E-01 | 26.11  | 14.22 | 6.65E-02 | 60.36  | 24.72 | 1.46E-02 |
| cg00961326 | 23.56  | 8.18  | 3.98E-03 | 44.60  | 19.28 | 2.07E-02 | 22.53  | 22.74  | 3.22E-01 | 22.07  | 13.37 | 9.88E-02 | 13.77  | 14.56 | 3.44E-01 |
| cg08735550 | 18.86  | 6.55  | 3.99E-03 | 20.98  | 9.85  | 3.31E-02 | 19.10  | 12.89  | 1.38E-01 | -5.36  | 18.78 | 7.75E-01 | 29.84  | 15.55 | 5.50E-02 |
| cg18871670 | 45.45  | 15.79 | 3.99E-03 | 53.60  | 21.70 | 1.35E-02 | 3.42   | 44.47  | 9.39E-01 | 118.32 | 72.22 | 1.01E-01 | 37.05  | 28.96 | 2.01E-01 |
| cg08122151 | -11.70 | 4.07  | 4.00E-03 | -15.00 | 6.50  | 2.09E-02 | -5.07  | 8.66   | 5.58E-01 | -26.08 | 12.66 | 3.94E-02 | -7.10  | 7.62  | 3.52E-01 |
| cg07099161 | 22.32  | 7.76  | 4.01E-03 | 30.48  | 12.44 | 1.42E-02 | 16.15  | 19.84  | 4.16E-01 | 10.93  | 18.95 | 5.64E-01 | 21.20  | 14.38 | 1.40E-01 |
| cg16099804 | 22.88  | 7.95  | 4.01E-03 | 44.94  | 21.97 | 4.08E-02 | 22.80  | 32.54  | 4.84E-01 | 19.64  | 11.17 | 7.88E-02 | 18.78  | 14.45 | 1.94E-01 |
| cg01394339 | -6.54  | 2.28  | 4.02E-03 | -5.54  | 3.06  | 6.97E-02 | -4.90  | 4.93   | 3.20E-01 | -6.03  | 11.48 | 5.99E-01 | -11.34 | 5.18  | 2.85E-02 |
| cg07007165 | 21.72  | 7.55  | 4.03E-03 | 13.14  | 16.37 | 4.22E-01 | 16.13  | 19.08  | 3.98E-01 | 28.64  | 14.07 | 4.18E-02 | 23.76  | 12.89 | 6.53E-02 |
| cg12603173 | 42.75  | 14.86 | 4.03E-03 | 49.04  | 18.25 | 7.20E-03 | 49.55  | 55.90  | 3.75E-01 | 53.66  | 46.12 | 2.45E-01 | 6.97   | 36.96 | 8.50E-01 |
| cg00673202 | -7.27  | 2.53  | 4.03E-03 | -8.11  | 3.61  | 2.47E-02 | -5.68  | 5.03   | 2.60E-01 | 8.57   | 12.23 | 4.83E-01 | -10.39 | 5.46  | 5.70E-02 |
| cg23463335 | 21.37  | 7.43  | 4.03E-03 | 29.14  | 19.39 | 1.33E-01 | 24.78  | 25.76  | 3.36E-01 | 17.58  | 8.81  | 4.60E-02 | 43.45  | 30.91 | 1.60E-01 |
| cg16544169 | 20.24  | 7.04  | 4.03E-03 | 20.79  | 10.42 | 4.59E-02 | 19.56  | 18.50  | 2.90E-01 | 16.30  | 18.05 | 3.66E-01 | 22.05  | 14.18 | 1.20E-01 |
| cg02034720 | -54.41 | 18.92 | 4.04E-03 | -51.86 | 24.58 | 3.48E-02 | -55.98 | 67.54  | 4.07E-01 | 5.44   | 66.71 | 9.35E-01 | -79.38 | 37.98 | 3.66E-02 |
| cg18440893 | 33.80  | 11.76 | 4.04E-03 | 32.26  | 38.05 | 3.97E-01 | 182.45 | 170.76 | 2.85E-01 | 35.25  | 12.82 | 5.96E-03 | 3.39   | 48.68 | 9.44E-01 |
| cg24795627 | 34.45  | 11.98 | 4.04E-03 | 33.41  | 31.22 | 2.85E-01 | 56.44  | 63.60  | 3.75E-01 | 27.64  | 14.93 | 6.42E-02 | 56.21  | 28.81 | 5.11E-02 |
| cg22452837 | -4.50  | 1.57  | 4.04E-03 | -5.33  | 2.55  | 3.65E-02 | -5.82  | 3.12   | 6.22E-02 | -7.21  | 4.24  | 8.87E-02 | -0.16  | 3.24  | 9.60E-01 |
| cg00808243 | 24.39  | 8.48  | 4.05E-03 | 14.44  | 24.61 | 5.57E-01 | 34.07  | 54.13  | 5.29E-01 | 24.57  | 9.60  | 1.05E-02 | 34.97  | 30.82 | 2.56E-01 |
| cg08901867 | -14.45 | 5.03  | 4.05E-03 | -7.13  | 10.72 | 5.06E-01 | -11.98 | 13.46  | 3.74E-01 | -14.93 | 7.25  | 3.96E-02 | -25.21 | 12.56 | 4.47E-02 |
| cg11826961 | 14.33  | 4.98  | 4.05E-03 | 15.82  | 6.77  | 1.94E-02 | 17.20  | 12.36  | 1.64E-01 | 3.76   | 13.99 | 7.88E-01 | 14.71  | 12.17 | 2.27E-01 |
| cg13418632 | -22.31 | 7.76  | 4.05E-03 | -28.25 | 12.05 | 1.91E-02 | 2.73   | 19.11  | 8.86E-01 | -33.01 | 17.55 | 6.00E-02 | -20.43 | 16.40 | 2.13E-01 |
| cg14877413 | 26.06  | 9.07  | 4.05E-03 | 17.97  | 16.42 | 2.74E-01 | 29.98  | 17.00  | 7.78E-02 | 17.63  | 17.52 | 3.14E-01 | 51.24  | 23.97 | 3.25E-02 |
| cg20005760 | -14.38 | 5.00  | 4.05E-03 | -16.80 | 12.62 | 1.83E-01 | -21.96 | 24.35  | 3.67E-01 | -14.44 | 5.99  | 1.60E-02 | -7.19  | 15.56 | 6.44E-01 |
| cg10662943 | -23.74 | 8.26  | 4.06E-03 | -7.45  | 19.34 | 7.00E-01 | -44.50 | 35.68  | 2.12E-01 | -22.37 | 9.89  | 2.37E-02 | -66.47 | 32.17 | 3.88E-02 |
| cg13289884 | -29.77 | 10.36 | 4.06E-03 | -21.31 | 15.00 | 1.55E-01 | -13.14 | 23.67  | 5.79E-01 | -55.36 | 37.03 | 1.35E-01 | -50.36 | 20.59 | 1.44E-02 |



|            |        |       |          |        |       |          |         |        |          |        |        |          |         |       |          |
|------------|--------|-------|----------|--------|-------|----------|---------|--------|----------|--------|--------|----------|---------|-------|----------|
| cg11742746 | -59.36 | 20.66 | 4.06E-03 | -48.77 | 26.01 | 6.07E-02 | -65.49  | 68.34  | 3.38E-01 | -20.73 | 66.90  | 7.57E-01 | -113.08 | 48.37 | 1.94E-02 |
| cg22752049 | 160.85 | 55.98 | 4.06E-03 | 228.67 | 82.09 | 5.34E-03 | 264.07  | 294.94 | 3.71E-01 | 165.56 | 148.22 | 2.64E-01 | 60.00   | 93.80 | 5.22E-01 |
| cg08353308 | 20.83  | 7.25  | 4.06E-03 | 9.07   | 17.15 | 5.97E-01 | -1.80   | 38.93  | 9.63E-01 | 23.58  | 8.60   | 6.11E-03 | 33.03   | 26.26 | 2.09E-01 |
| cg03373714 | 31.71  | 11.04 | 4.07E-03 | 27.24  | 14.84 | 6.64E-02 | -11.64  | 40.12  | 7.72E-01 | 57.85  | 47.18  | 2.20E-01 | 45.41   | 19.64 | 2.07E-02 |
| cg07515865 | 52.73  | 18.35 | 4.07E-03 | -20.28 | 62.19 | 7.44E-01 | -99.85  | 168.77 | 5.54E-01 | 62.42  | 20.17  | 1.97E-03 | 54.66   | 67.97 | 4.21E-01 |
| cg11345703 | -13.49 | 4.70  | 4.07E-03 | -17.26 | 7.00  | 1.37E-02 | -11.81  | 9.65   | 2.21E-01 | -13.97 | 15.63  | 3.72E-01 | -7.50   | 9.95  | 4.51E-01 |
| cg24734586 | 20.83  | 7.25  | 4.07E-03 | 3.39   | 23.66 | 8.86E-01 | -52.61  | 101.01 | 6.02E-01 | 22.32  | 8.05   | 5.54E-03 | 29.89   | 24.30 | 2.19E-01 |
| cg10956762 | -21.18 | 7.37  | 4.07E-03 | -14.24 | 11.86 | 2.30E-01 | -17.78  | 21.82  | 4.15E-01 | -28.27 | 16.00  | 7.72E-02 | -26.64  | 13.77 | 5.31E-02 |
| cg05455279 | -9.34  | 3.25  | 4.08E-03 | -14.75 | 6.96  | 3.39E-02 | -3.04   | 12.14  | 8.02E-01 | -8.66  | 4.26   | 4.22E-02 | -6.72   | 9.10  | 4.60E-01 |
| cg23641635 | 13.34  | 4.64  | 4.08E-03 | 14.66  | 9.19  | 1.11E-01 | 18.35   | 16.22  | 2.58E-01 | 11.80  | 6.13   | 5.42E-02 | 14.85   | 15.58 | 3.41E-01 |
| cg05165935 | 21.13  | 7.36  | 4.08E-03 | 24.16  | 20.92 | 2.48E-01 | 0.08    | 47.68  | 9.99E-01 | 23.05  | 8.36   | 5.83E-03 | 3.68    | 26.36 | 8.89E-01 |
| cg04744409 | 10.82  | 3.77  | 4.08E-03 | 7.85   | 6.02  | 1.92E-01 | 13.54   | 8.88   | 1.27E-01 | 9.55   | 8.24   | 2.46E-01 | 15.09   | 8.04  | 6.05E-02 |
| cg10100811 | -11.87 | 4.13  | 4.08E-03 | -7.97  | 7.76  | 3.04E-01 | -0.68   | 10.07  | 9.46E-01 | -15.85 | 6.37   | 1.28E-02 | -22.16  | 11.57 | 5.55E-02 |
| cg24664861 | -59.09 | 20.58 | 4.08E-03 | -72.56 | 25.48 | 4.40E-03 | 68.60   | 108.97 | 5.29E-01 | -11.81 | 84.55  | 8.89E-01 | -53.42  | 40.92 | 1.92E-01 |
| cg15603354 | -10.55 | 3.67  | 4.08E-03 | -15.41 | 6.68  | 2.11E-02 | -8.32   | 9.45   | 3.78E-01 | -10.62 | 5.90   | 7.20E-02 | -3.26   | 9.21  | 7.23E-01 |
| cg06417385 | -14.67 | 5.11  | 4.09E-03 | -8.03  | 9.09  | 3.77E-01 | -12.60  | 12.31  | 3.06E-01 | -19.20 | 9.32   | 3.94E-02 | -19.87  | 11.12 | 7.39E-02 |
| cg24908166 | -32.23 | 11.22 | 4.09E-03 | -29.04 | 16.26 | 7.40E-02 | -21.72  | 46.85  | 6.43E-01 | -41.83 | 23.91  | 8.02E-02 | -32.24  | 22.65 | 1.55E-01 |
| cg02110836 | -20.14 | 7.02  | 4.10E-03 | -34.93 | 9.06  | 1.16E-04 | -9.81   | 13.21  | 4.58E-01 | -18.89 | 15.97  | 2.37E-01 | -9.35   | 11.34 | 4.10E-01 |
| cg01170591 | -26.73 | 9.31  | 4.11E-03 | -22.45 | 24.07 | 3.51E-01 | -2.88   | 30.41  | 9.25E-01 | -35.61 | 11.24  | 1.53E-03 | 19.67   | 35.33 | 5.78E-01 |
| cg24851651 | 1.77   | 0.62  | 4.11E-03 | 1.37   | 0.89  | 1.26E-01 | 3.60    | 1.32   | 6.27E-03 | 1.51   | 1.61   | 3.48E-01 | 0.68    | 1.55  | 6.63E-01 |
| cg02680909 | -13.24 | 4.62  | 4.11E-03 | -18.25 | 6.78  | 7.13E-03 | -10.34  | 11.13  | 3.53E-01 | 2.12   | 13.51  | 8.75E-01 | -13.14  | 9.26  | 1.56E-01 |
| cg05217213 | -11.87 | 4.14  | 4.12E-03 | -13.96 | 9.81  | 1.55E-01 | -18.50  | 10.91  | 9.00E-02 | -12.39 | 5.58   | 2.64E-02 | 0.56    | 11.48 | 9.61E-01 |
| cg02356111 | 46.02  | 16.04 | 4.12E-03 | 39.87  | 51.31 | 4.37E-01 | -127.32 | 252.25 | 6.14E-01 | 50.42  | 17.49  | 3.93E-03 | 3.71    | 67.27 | 9.56E-01 |
| cg00597366 | -70.52 | 24.58 | 4.12E-03 | -75.53 | 31.72 | 1.73E-02 | -40.54  | 133.65 | 7.62E-01 | 11.42  | 75.52  | 8.80E-01 | -96.28  | 48.22 | 4.59E-02 |
| cg14151259 | 32.45  | 11.31 | 4.12E-03 | 27.41  | 16.04 | 8.74E-02 | 98.00   | 41.90  | 1.94E-02 | 17.16  | 41.67  | 6.80E-01 | 29.24   | 18.95 | 1.23E-01 |
| cg27555803 | 22.06  | 7.69  | 4.12E-03 | 6.77   | 21.71 | 7.55E-01 | -51.81  | 77.16  | 5.02E-01 | 25.30  | 8.53   | 3.02E-03 | 22.45   | 33.75 | 5.06E-01 |
| cg07129879 | -12.07 | 4.21  | 4.12E-03 | -22.57 | 8.26  | 6.27E-03 | -4.70   | 10.48  | 6.54E-01 | -9.48  | 6.32   | 1.34E-01 | -9.19   | 11.38 | 4.19E-01 |
| cg24182581 | -18.17 | 6.34  | 4.14E-03 | -17.25 | 12.30 | 1.61E-01 | -14.36  | 22.78  | 5.28E-01 | -17.87 | 9.02   | 4.76E-02 | -22.41  | 15.70 | 1.53E-01 |
| cg20948923 | -11.79 | 4.11  | 4.15E-03 | -7.04  | 8.86  | 4.27E-01 | -8.80   | 16.45  | 5.93E-01 | -12.50 | 5.11   | 1.44E-02 | -22.05  | 15.18 | 1.46E-01 |
| cg08473553 | 34.85  | 12.16 | 4.15E-03 | 52.86  | 28.80 | 6.64E-02 | 40.20   | 104.77 | 7.01E-01 | 33.89  | 14.80  | 2.20E-02 | 15.08   | 33.30 | 6.51E-01 |
| cg23530263 | 29.84  | 10.41 | 4.15E-03 | 21.52  | 32.55 | 5.09E-01 | -211.83 | 152.78 | 1.66E-01 | 33.06  | 11.36  | 3.59E-03 | 15.84   | 45.54 | 7.28E-01 |
| cg25130993 | 24.43  | 8.52  | 4.15E-03 | -7.08  | 30.09 | 8.14E-01 | -1.69   | 103.13 | 9.87E-01 | 28.66  | 9.42   | 2.35E-03 | 16.42   | 27.66 | 5.53E-01 |
| cg11837402 | 43.01  | 15.01 | 4.16E-03 | -16.53 | 45.79 | 7.18E-01 | 0.07    | 196.51 | 1.00E+00 | 48.52  | 16.47  | 3.21E-03 | 79.77   | 63.32 | 2.08E-01 |
| cg03232390 | -7.00  | 2.44  | 4.16E-03 | -11.08 | 5.14  | 3.09E-02 | -6.54   | 6.42   | 3.09E-01 | -4.56  | 3.53   | 1.96E-01 | -9.05   | 6.29  | 1.50E-01 |
| cg03724990 | 20.84  | 7.27  | 4.16E-03 | 21.52  | 10.18 | 3.44E-02 | 37.12   | 22.85  | 1.04E-01 | 23.61  | 22.04  | 2.84E-01 | 12.60   | 13.76 | 3.60E-01 |

|            |        |       |          |        |       |          |        |        |          |        |       |          |         |       |          |
|------------|--------|-------|----------|--------|-------|----------|--------|--------|----------|--------|-------|----------|---------|-------|----------|
| cg23154272 | 26.25  | 9.16  | 4.16E-03 | 27.92  | 16.40 | 8.86E-02 | 26.97  | 16.98  | 1.12E-01 | 26.02  | 20.69 | 2.08E-01 | 22.85   | 20.43 | 2.64E-01 |
| cg19921170 | -54.87 | 19.15 | 4.16E-03 | -45.23 | 23.06 | 4.98E-02 | 28.65  | 107.13 | 7.89E-01 | 3.98   | 88.97 | 9.64E-01 | -106.77 | 39.75 | 7.23E-03 |
| cg04456666 | 45.62  | 15.92 | 4.17E-03 | 15.57  | 40.18 | 6.98E-01 | -63.51 | 141.05 | 6.53E-01 | 50.73  | 18.48 | 6.05E-03 | 72.04   | 53.70 | 1.80E-01 |
| cg16404364 | 17.31  | 6.04  | 4.18E-03 | 28.17  | 14.62 | 5.40E-02 | 40.54  | 21.28  | 5.68E-02 | 10.77  | 7.23  | 1.37E-01 | 34.12   | 27.00 | 2.06E-01 |
| cg00834988 | 9.39   | 3.28  | 4.19E-03 | 10.61  | 4.53  | 1.92E-02 | 2.82   | 7.92   | 7.22E-01 | 10.30  | 7.99  | 1.97E-01 | 11.86   | 8.89  | 1.82E-01 |
| cg14663951 | 21.15  | 7.39  | 4.19E-03 | 26.17  | 16.67 | 1.16E-01 | 47.41  | 23.76  | 4.60E-02 | 12.95  | 9.27  | 1.62E-01 | 44.31   | 27.43 | 1.06E-01 |
| cg13092405 | 4.93   | 1.72  | 4.19E-03 | 6.00   | 2.27  | 8.32E-03 | 3.31   | 3.63   | 3.62E-01 | -0.57  | 6.90  | 9.35E-01 | 5.58    | 4.61  | 2.25E-01 |
| cg07742633 | 30.53  | 10.66 | 4.20E-03 | 18.07  | 23.29 | 4.38E-01 | -72.02 | 78.76  | 3.61E-01 | 32.02  | 11.63 | 5.91E-03 | 68.32   | 35.58 | 5.48E-02 |
| cg18736791 | 32.17  | 11.23 | 4.20E-03 | 27.06  | 14.44 | 6.09E-02 | -25.82 | 48.95  | 5.98E-01 | 53.10  | 36.74 | 1.48E-01 | 49.01   | 22.54 | 2.97E-02 |
| cg19550904 | 13.35  | 4.66  | 4.20E-03 | 14.26  | 7.43  | 5.50E-02 | 2.42   | 11.31  | 8.30E-01 | 14.24  | 9.77  | 1.45E-01 | 19.55   | 10.20 | 5.53E-02 |
| cg00754584 | -37.39 | 13.06 | 4.20E-03 | -28.39 | 25.79 | 2.71E-01 | -59.12 | 213.07 | 7.81E-01 | -41.10 | 15.93 | 9.88E-03 | -33.48  | 50.38 | 5.06E-01 |
| cg18347630 | 15.02  | 5.25  | 4.20E-03 | 14.52  | 7.27  | 4.59E-02 | 32.14  | 13.28  | 1.55E-02 | 5.57   | 14.24 | 6.96E-01 | 9.02    | 12.13 | 4.57E-01 |
| cg24199203 | 10.55  | 3.69  | 4.20E-03 | 9.62   | 5.71  | 9.22E-02 | 11.54  | 8.22   | 1.60E-01 | 15.54  | 7.01  | 2.67E-02 | -0.63   | 11.30 | 9.56E-01 |
| cg03844838 | -51.83 | 18.11 | 4.21E-03 | -55.27 | 28.09 | 4.91E-02 | 11.06  | 50.34  | 8.26E-01 | -60.53 | 33.79 | 7.33E-02 | -76.92  | 44.19 | 8.18E-02 |
| cg13285077 | -13.79 | 4.82  | 4.21E-03 | -17.76 | 6.87  | 9.74E-03 | -18.70 | 11.84  | 1.14E-01 | -2.53  | 14.27 | 8.59E-01 | -7.31   | 10.07 | 4.68E-01 |
| cg16681239 | 18.01  | 6.29  | 4.21E-03 | 28.08  | 10.88 | 9.83E-03 | 7.18   | 17.35  | 6.79E-01 | 16.54  | 13.13 | 2.08E-01 | 12.72   | 11.41 | 2.65E-01 |
| cg08472795 | 18.65  | 6.52  | 4.21E-03 | 21.11  | 9.99  | 3.46E-02 | 17.48  | 12.92  | 1.76E-01 | 23.64  | 17.44 | 1.75E-01 | 10.64   | 15.33 | 4.88E-01 |
| cg09272702 | -15.38 | 5.37  | 4.22E-03 | -32.82 | 12.64 | 9.42E-03 | -27.85 | 29.87  | 3.51E-01 | -11.83 | 6.47  | 6.73E-02 | -3.87   | 17.34 | 8.23E-01 |
| cg06213047 | -15.49 | 5.41  | 4.22E-03 | -11.69 | 12.90 | 3.65E-01 | -1.63  | 18.61  | 9.30E-01 | -16.62 | 6.80  | 1.45E-02 | -26.26  | 16.74 | 1.17E-01 |
| cg21748223 | 20.40  | 7.13  | 4.22E-03 | 36.73  | 20.87 | 7.85E-02 | 41.44  | 64.80  | 5.22E-01 | 19.23  | 8.08  | 1.74E-02 | 6.94    | 23.41 | 7.67E-01 |
| cg00698906 | 27.00  | 9.44  | 4.23E-03 | 26.83  | 11.81 | 2.31E-02 | 34.86  | 36.49  | 3.39E-01 | 1.64   | 72.93 | 9.82E-01 | 27.01   | 17.91 | 1.32E-01 |
| cg03642472 | -16.59 | 5.80  | 4.24E-03 | -18.57 | 12.67 | 1.43E-01 | -2.83  | 16.56  | 8.64E-01 | -15.31 | 7.95  | 5.41E-02 | -31.10  | 15.79 | 4.90E-02 |
| cg09858767 | -12.74 | 4.46  | 4.24E-03 | -14.49 | 7.60  | 5.66E-02 | -13.50 | 10.23  | 1.87E-01 | -10.23 | 9.59  | 2.86E-01 | -11.93  | 8.90  | 1.80E-01 |
| cg03369250 | 27.99  | 9.79  | 4.24E-03 | 28.50  | 31.18 | 3.61E-01 | 35.81  | 120.03 | 7.65E-01 | 28.12  | 10.87 | 9.67E-03 | 25.54   | 33.89 | 4.51E-01 |
| cg19506025 | 18.64  | 6.52  | 4.25E-03 | 24.08  | 13.54 | 7.54E-02 | 44.05  | 40.56  | 2.77E-01 | 13.38  | 8.05  | 9.65E-02 | 36.55   | 22.24 | 1.00E-01 |
| cg05305278 | -12.73 | 4.45  | 4.25E-03 | -5.52  | 8.85  | 5.33E-01 | -19.73 | 12.65  | 1.19E-01 | -15.00 | 6.22  | 1.59E-02 | -10.88  | 13.40 | 4.17E-01 |
| cg05281206 | -12.72 | 4.45  | 4.25E-03 | -23.78 | 9.54  | 1.27E-02 | -1.78  | 15.85  | 9.10E-01 | -9.68  | 5.96  | 1.05E-01 | -13.74  | 11.58 | 2.36E-01 |
| cg07111719 | 22.46  | 7.86  | 4.26E-03 | 38.42  | 17.00 | 2.39E-02 | 33.20  | 19.24  | 8.44E-02 | 10.52  | 10.73 | 3.27E-01 | 36.96   | 27.24 | 1.75E-01 |
| cg00747372 | -11.19 | 3.91  | 4.26E-03 | -14.90 | 9.53  | 1.18E-01 | -21.93 | 18.92  | 2.46E-01 | -10.40 | 4.70  | 2.68E-02 | -5.42   | 12.79 | 6.72E-01 |
| cg13981325 | 7.74   | 2.71  | 4.26E-03 | 8.94   | 3.70  | 1.57E-02 | 5.46   | 5.24   | 2.97E-01 | 3.99   | 10.28 | 6.98E-01 | 9.52    | 7.58  | 2.09E-01 |
| cg18618431 | 21.70  | 7.59  | 4.26E-03 | 21.33  | 18.21 | 2.41E-01 | -35.72 | 40.95  | 3.83E-01 | 25.12  | 9.07  | 5.62E-03 | 17.75   | 25.07 | 4.79E-01 |
| cg10582608 | -4.03  | 1.41  | 4.27E-03 | -5.38  | 2.10  | 1.02E-02 | -4.08  | 2.94   | 1.66E-01 | -5.69  | 4.44  | 2.00E-01 | -0.39   | 3.02  | 8.97E-01 |
| cg27084736 | -16.32 | 5.71  | 4.27E-03 | -9.42  | 17.31 | 5.86E-01 | -9.06  | 24.29  | 7.09E-01 | -18.05 | 6.45  | 5.11E-03 | -12.28  | 25.17 | 6.26E-01 |
| cg13534999 | -14.64 | 5.12  | 4.27E-03 | -29.39 | 10.04 | 3.42E-03 | -27.90 | 26.37  | 2.90E-01 | -9.79  | 4.45  | 2.78E-02 | -9.51   | 14.76 | 5.19E-01 |
| cg13049624 | -17.88 | 6.26  | 4.28E-03 | -0.98  | 15.31 | 9.49E-01 | -4.92  | 29.31  | 8.67E-01 | -21.64 | 7.49  | 3.88E-03 | -26.73  | 20.91 | 2.01E-01 |

|            |        |       |          |        |       |          |         |        |          |        |       |          |        |       |          |
|------------|--------|-------|----------|--------|-------|----------|---------|--------|----------|--------|-------|----------|--------|-------|----------|
| cg05628049 | 12.15  | 4.25  | 4.28E-03 | 16.03  | 6.02  | 7.72E-03 | 12.10   | 10.89  | 2.66E-01 | 10.95  | 9.54  | 2.51E-01 | 0.80   | 11.02 | 9.42E-01 |
| cg21274025 | 25.32  | 8.86  | 4.28E-03 | 32.76  | 17.67 | 6.38E-02 | 23.13   | 18.96  | 2.23E-01 | 25.72  | 14.52 | 7.66E-02 | 15.56  | 22.34 | 4.86E-01 |
| cg04106076 | -17.72 | 6.20  | 4.28E-03 | -21.21 | 9.90  | 3.21E-02 | -21.97  | 15.31  | 1.51E-01 | -11.93 | 15.95 | 4.54E-01 | -13.62 | 11.48 | 2.35E-01 |
| cg14517743 | 17.80  | 6.23  | 4.29E-03 | 29.95  | 19.85 | 1.31E-01 | -27.68  | 57.97  | 6.33E-01 | 19.11  | 6.97  | 6.13E-03 | -1.11  | 20.68 | 9.57E-01 |
| cg11988910 | 18.69  | 6.54  | 4.29E-03 | 26.65  | 10.78 | 1.34E-02 | 9.93    | 15.43  | 5.20E-01 | 18.88  | 11.68 | 1.06E-01 | 8.38   | 17.64 | 6.35E-01 |
| cg20220316 | 41.60  | 14.57 | 4.29E-03 | 39.01  | 20.73 | 5.99E-02 | -3.53   | 65.87  | 9.57E-01 | 41.33  | 42.02 | 3.25E-01 | 52.06  | 25.09 | 3.80E-02 |
| cg18815120 | 5.38   | 1.88  | 4.30E-03 | 4.73   | 2.85  | 9.74E-02 | 6.07    | 4.97   | 2.22E-01 | 3.66   | 4.98  | 4.62E-01 | 6.93   | 3.58  | 5.29E-02 |
| cg19016694 | -11.04 | 3.87  | 4.30E-03 | -11.21 | 5.17  | 3.00E-02 | -17.40  | 11.01  | 1.14E-01 | -6.94  | 9.38  | 4.59E-01 | -9.80  | 10.12 | 3.33E-01 |
| cg17741993 | -7.39  | 2.59  | 4.30E-03 | -8.13  | 3.45  | 1.84E-02 | -5.80   | 5.39   | 2.81E-01 | -13.56 | 10.51 | 1.97E-01 | -4.46  | 6.81  | 5.12E-01 |
| cg03519879 | -17.91 | 6.27  | 4.30E-03 | -20.27 | 9.80  | 3.86E-02 | -20.88  | 14.75  | 1.57E-01 | 1.10   | 15.78 | 9.45E-01 | -23.90 | 12.52 | 5.63E-02 |
| cg04838709 | -45.95 | 16.10 | 4.32E-03 | -39.27 | 23.32 | 9.22E-02 | -29.45  | 90.28  | 7.44E-01 | -59.64 | 30.67 | 5.18E-02 | -45.65 | 34.66 | 1.88E-01 |
| cg13434842 | 13.22  | 4.63  | 4.32E-03 | 8.10   | 7.61  | 2.87E-01 | 13.06   | 10.18  | 2.00E-01 | 27.35  | 11.50 | 1.74E-02 | 11.82  | 9.07  | 1.93E-01 |
| cg00213142 | 16.52  | 5.79  | 4.33E-03 | 8.94   | 9.31  | 3.37E-01 | 32.91   | 11.14  | 3.13E-03 | 8.68   | 12.13 | 4.74E-01 | 17.54  | 12.76 | 1.69E-01 |
| cg20670923 | 11.93  | 4.18  | 4.33E-03 | 15.93  | 5.28  | 2.56E-03 | 11.39   | 11.16  | 3.07E-01 | 14.51  | 16.33 | 3.74E-01 | -3.66  | 10.24 | 7.21E-01 |
| cg25185525 | 29.31  | 10.27 | 4.33E-03 | 39.67  | 20.98 | 5.86E-02 | 27.41   | 21.23  | 1.97E-01 | 21.81  | 16.24 | 1.79E-01 | 37.01  | 28.99 | 2.02E-01 |
| cg13201297 | -16.34 | 5.73  | 4.33E-03 | -24.10 | 8.41  | 4.18E-03 | -9.10   | 11.86  | 4.43E-01 | -10.22 | 17.76 | 5.65E-01 | -9.97  | 12.85 | 4.37E-01 |
| cg10503891 | 63.01  | 22.09 | 4.33E-03 | 38.32  | 30.36 | 2.07E-01 | 96.46   | 130.65 | 4.60E-01 | 84.90  | 49.37 | 8.55E-02 | 94.94  | 44.90 | 3.45E-02 |
| cg24303306 | -33.42 | 11.72 | 4.34E-03 | -33.78 | 19.23 | 7.89E-02 | -3.14   | 31.36  | 9.20E-01 | -51.30 | 22.87 | 2.49E-02 | -30.78 | 24.62 | 2.11E-01 |
| cg19656847 | 21.79  | 7.64  | 4.34E-03 | 27.36  | 12.59 | 2.97E-02 | 8.01    | 21.99  | 7.16E-01 | 16.23  | 11.78 | 1.68E-01 | 43.51  | 25.46 | 8.75E-02 |
| cg04802386 | -10.58 | 3.71  | 4.34E-03 | -8.41  | 7.40  | 2.56E-01 | 1.27    | 9.01   | 8.88E-01 | -14.37 | 5.45  | 8.40E-03 | -17.55 | 10.92 | 1.08E-01 |
| cg24428758 | 26.02  | 9.12  | 4.34E-03 | 25.26  | 12.45 | 4.24E-02 | 8.09    | 34.69  | 8.16E-01 | 61.68  | 50.19 | 2.19E-01 | 27.33  | 15.20 | 7.21E-02 |
| cg11358199 | -11.21 | 3.93  | 4.35E-03 | -11.56 | 5.00  | 2.07E-02 | -13.60  | 9.74   | 1.63E-01 | -0.35  | 15.45 | 9.82E-01 | -11.83 | 10.01 | 2.37E-01 |
| cg15600835 | -27.33 | 9.58  | 4.35E-03 | -20.29 | 27.37 | 4.59E-01 | -93.87  | 116.21 | 4.19E-01 | -30.22 | 10.62 | 4.45E-03 | 6.85   | 40.21 | 8.65E-01 |
| cg06674117 | -15.37 | 5.39  | 4.35E-03 | -20.30 | 15.14 | 1.80E-01 | -43.03  | 30.09  | 1.53E-01 | -11.78 | 6.23  | 5.85E-02 | -28.19 | 17.79 | 1.13E-01 |
| cg07901571 | -12.94 | 4.54  | 4.36E-03 | -20.09 | 10.10 | 4.67E-02 | 3.93    | 14.00  | 7.79E-01 | -11.61 | 5.99  | 5.24E-02 | -22.18 | 13.21 | 9.32E-02 |
| cg18142162 | 16.07  | 5.64  | 4.36E-03 | 14.24  | 7.69  | 6.41E-02 | 30.79   | 13.87  | 2.64E-02 | 16.34  | 20.50 | 4.26E-01 | 9.44   | 11.97 | 4.30E-01 |
| cg04578317 | 13.99  | 4.91  | 4.37E-03 | 7.46   | 6.92  | 2.81E-01 | 25.81   | 10.62  | 1.51E-02 | 6.85   | 17.07 | 6.88E-01 | 20.78  | 10.97 | 5.82E-02 |
| cg02624019 | 29.77  | 10.44 | 4.37E-03 | 24.37  | 21.70 | 2.62E-01 | 19.65   | 22.59  | 3.84E-01 | 26.00  | 16.04 | 1.05E-01 | 68.21  | 28.93 | 1.84E-02 |
| cg07841500 | 19.36  | 6.79  | 4.38E-03 | 18.74  | 15.16 | 2.17E-01 | 11.64   | 21.45  | 5.88E-01 | 19.35  | 8.59  | 2.43E-02 | 31.70  | 25.03 | 2.05E-01 |
| cg01287975 | 16.06  | 5.64  | 4.38E-03 | 16.38  | 7.95  | 3.95E-02 | 4.17    | 13.69  | 7.61E-01 | 48.19  | 22.09 | 2.91E-02 | 15.18  | 10.99 | 1.67E-01 |
| cg27179533 | 25.11  | 8.81  | 4.39E-03 | 44.80  | 24.75 | 7.03E-02 | 87.41   | 49.50  | 7.74E-02 | 17.65  | 10.79 | 1.02E-01 | 28.04  | 21.16 | 1.85E-01 |
| cg04341153 | 38.82  | 13.63 | 4.39E-03 | 61.59  | 48.06 | 2.00E-01 | -159.20 | 234.13 | 4.97E-01 | 34.26  | 14.64 | 1.93E-02 | 94.92  | 61.11 | 1.20E-01 |
| cg20134241 | 36.50  | 12.81 | 4.39E-03 | 47.30  | 16.58 | 4.33E-03 | 10.03   | 37.28  | 7.88E-01 | -23.25 | 47.88 | 6.27E-01 | 40.96  | 27.74 | 1.40E-01 |
| cg16590154 | -24.13 | 8.47  | 4.39E-03 | -7.13  | 23.46 | 7.61E-01 | -17.13  | 29.69  | 5.64E-01 | -30.37 | 9.96  | 2.30E-03 | 2.44   | 33.26 | 9.42E-01 |
| cg02909320 | -21.30 | 7.48  | 4.40E-03 | -7.01  | 13.65 | 6.08E-01 | -59.28  | 37.72  | 1.16E-01 | -23.25 | 10.12 | 2.16E-02 | -36.46 | 22.11 | 9.92E-02 |

|            |        |       |          |         |       |          |         |        |          |        |       |          |        |       |          |
|------------|--------|-------|----------|---------|-------|----------|---------|--------|----------|--------|-------|----------|--------|-------|----------|
| cg15787807 | 11.03  | 3.87  | 4.40E-03 | 13.26   | 7.50  | 7.70E-02 | 12.95   | 11.38  | 2.55E-01 | 9.28   | 5.35  | 8.27E-02 | 12.14  | 12.73 | 3.40E-01 |
| cg01995099 | 20.27  | 7.12  | 4.40E-03 | 18.05   | 10.07 | 7.31E-02 | 20.93   | 14.18  | 1.40E-01 | 22.58  | 24.42 | 3.55E-01 | 24.84  | 17.59 | 1.58E-01 |
| cg22645350 | 36.74  | 12.90 | 4.40E-03 | 20.80   | 20.77 | 3.17E-01 | -7.67   | 47.57  | 8.72E-01 | 61.22  | 21.22 | 3.91E-03 | 38.85  | 31.20 | 2.13E-01 |
| cg19759172 | 13.29  | 4.67  | 4.41E-03 | 7.39    | 16.05 | 6.45E-01 | 1.09    | 19.97  | 9.57E-01 | 13.37  | 5.16  | 9.59E-03 | 38.95  | 22.54 | 8.39E-02 |
| cg18490614 | 12.67  | 4.45  | 4.42E-03 | 15.64   | 6.82  | 2.18E-02 | 11.31   | 10.44  | 2.79E-01 | 10.89  | 10.12 | 2.82E-01 | 9.28   | 9.98  | 3.52E-01 |
| cg15835542 | 13.58  | 4.77  | 4.42E-03 | 15.45   | 6.84  | 2.40E-02 | 7.98    | 17.33  | 6.45E-01 | 13.28  | 10.89 | 2.22E-01 | 11.86  | 9.62  | 2.18E-01 |
| cg19243391 | -18.36 | 6.45  | 4.42E-03 | -23.68  | 10.92 | 3.01E-02 | -4.82   | 12.91  | 7.09E-01 | -10.23 | 14.19 | 4.71E-01 | -34.73 | 14.59 | 1.73E-02 |
| cg27235662 | -12.32 | 4.33  | 4.42E-03 | -14.98  | 6.32  | 1.79E-02 | -16.13  | 9.44   | 8.75E-02 | -6.90  | 11.91 | 5.62E-01 | -5.29  | 9.93  | 5.94E-01 |
| cg25455598 | 43.69  | 15.35 | 4.42E-03 | 42.44   | 49.11 | 3.88E-01 | -270.36 | 189.48 | 1.54E-01 | 45.06  | 17.05 | 8.21E-03 | 56.29  | 52.62 | 2.85E-01 |
| cg26543333 | 10.28  | 3.61  | 4.42E-03 | 10.25   | 5.48  | 6.16E-02 | 8.69    | 7.04   | 2.17E-01 | 19.98  | 8.64  | 2.07E-02 | 0.45   | 10.05 | 9.64E-01 |
| cg13472192 | 17.51  | 6.15  | 4.43E-03 | 30.41   | 14.41 | 3.48E-02 | 27.49   | 20.01  | 1.69E-01 | 13.62  | 9.65  | 1.58E-01 | 12.09  | 10.93 | 2.68E-01 |
| cg03580279 | 26.30  | 9.24  | 4.43E-03 | 43.63   | 20.00 | 2.92E-02 | 26.31   | 19.24  | 1.71E-01 | 12.93  | 14.26 | 3.65E-01 | 40.35  | 25.05 | 1.07E-01 |
| cg16411152 | 17.18  | 6.04  | 4.43E-03 | 28.61   | 15.68 | 6.80E-02 | 12.93   | 23.59  | 5.84E-01 | 15.64  | 7.00  | 2.55E-02 | 10.84  | 28.99 | 7.08E-01 |
| cg07022554 | 17.56  | 6.17  | 4.43E-03 | 16.86   | 13.48 | 2.11E-01 | 54.45   | 40.21  | 1.76E-01 | 14.69  | 7.47  | 4.92E-02 | 32.09  | 21.18 | 1.30E-01 |
| cg04536588 | -10.10 | 3.55  | 4.45E-03 | -16.86  | 9.14  | 6.50E-02 | -6.05   | 13.95  | 6.64E-01 | -10.96 | 4.33  | 1.13E-02 | 1.92   | 10.63 | 8.57E-01 |
| cg12493107 | -24.47 | 8.60  | 4.45E-03 | -26.98  | 14.42 | 6.14E-02 | -33.05  | 20.64  | 1.09E-01 | -14.67 | 16.20 | 3.65E-01 | -26.47 | 19.79 | 1.81E-01 |
| cg21005438 | -20.73 | 7.29  | 4.45E-03 | -20.37  | 13.51 | 1.32E-01 | 1.87    | 20.78  | 9.28E-01 | -30.36 | 11.03 | 5.92E-03 | -11.92 | 18.82 | 5.27E-01 |
| cg23557906 | -24.68 | 8.68  | 4.45E-03 | -26.17  | 12.22 | 3.22E-02 | -6.10   | 23.99  | 7.99E-01 | -40.87 | 23.74 | 8.52E-02 | -22.61 | 18.05 | 2.10E-01 |
| cg15061025 | 24.45  | 8.60  | 4.45E-03 | 23.79   | 12.19 | 5.10E-02 | 49.34   | 23.50  | 3.58E-02 | 17.97  | 26.95 | 5.05E-01 | 15.68  | 16.62 | 3.45E-01 |
| cg05004900 | -31.32 | 11.01 | 4.46E-03 | -48.56  | 28.81 | 9.19E-02 | -177.51 | 161.19 | 2.71E-01 | -30.97 | 12.29 | 1.17E-02 | 32.83  | 51.67 | 5.25E-01 |
| cg03872934 | -14.57 | 5.13  | 4.46E-03 | -11.39  | 6.74  | 9.09E-02 | -13.60  | 11.82  | 2.50E-01 | -22.17 | 21.22 | 2.96E-01 | -23.63 | 12.26 | 5.39E-02 |
| cg00110846 | -19.85 | 6.98  | 4.46E-03 | -18.71  | 14.19 | 1.87E-01 | -3.78   | 21.42  | 8.60E-01 | -18.08 | 9.92  | 6.83E-02 | -38.18 | 17.67 | 3.07E-02 |
| cg26302103 | -62.17 | 21.87 | 4.46E-03 | -108.46 | 68.11 | 1.11E-01 | -202.01 | 210.89 | 3.38E-01 | -62.10 | 24.98 | 1.29E-02 | -10.28 | 63.18 | 8.71E-01 |
| cg13219625 | 37.92  | 13.34 | 4.47E-03 | 55.22   | 38.23 | 1.49E-01 | -46.12  | 121.93 | 7.05E-01 | 36.83  | 14.87 | 1.32E-02 | 34.23  | 53.72 | 5.24E-01 |
| cg07606115 | 15.13  | 5.32  | 4.48E-03 | 5.50    | 10.16 | 5.88E-01 | 4.30    | 13.78  | 7.55E-01 | 25.02  | 8.31  | 2.61E-03 | 16.34  | 13.05 | 2.11E-01 |
| cg24128630 | 22.32  | 7.85  | 4.48E-03 | 7.40    | 15.34 | 6.29E-01 | 41.73   | 46.53  | 3.70E-01 | 27.90  | 10.07 | 5.59E-03 | 21.98  | 24.72 | 3.74E-01 |
| cg00613385 | -18.61 | 6.55  | 4.48E-03 | -26.32  | 16.41 | 1.09E-01 | -1.14   | 19.76  | 9.54E-01 | -15.89 | 8.10  | 4.97E-02 | -50.62 | 23.58 | 3.18E-02 |
| cg08691479 | -42.05 | 14.80 | 4.48E-03 | -77.10  | 32.74 | 1.85E-02 | -79.35  | 82.60  | 3.37E-01 | -32.63 | 18.32 | 7.50E-02 | -22.25 | 44.34 | 6.16E-01 |
| cg23487226 | -13.86 | 4.88  | 4.48E-03 | -27.62  | 10.25 | 7.05E-03 | -14.03  | 11.48  | 2.22E-01 | -6.55  | 6.76  | 3.33E-01 | -18.61 | 14.54 | 2.01E-01 |
| cg07727425 | 17.73  | 6.24  | 4.48E-03 | 37.89   | 13.92 | 6.48E-03 | 17.88   | 17.12  | 2.96E-01 | 10.34  | 7.95  | 1.93E-01 | 23.64  | 23.88 | 3.22E-01 |
| cg15481161 | 16.69  | 5.87  | 4.49E-03 | 33.42   | 16.22 | 3.94E-02 | 99.25   | 65.82  | 1.32E-01 | 13.40  | 6.56  | 4.10E-02 | 13.06  | 24.18 | 5.89E-01 |
| cg08417857 | -11.94 | 4.20  | 4.49E-03 | -11.40  | 8.07  | 1.57E-01 | -6.90   | 14.42  | 6.32E-01 | -10.39 | 5.96  | 8.13E-02 | -21.08 | 10.96 | 5.45E-02 |
| cg17783244 | 13.79  | 4.85  | 4.49E-03 | 19.58   | 7.44  | 8.55E-03 | 14.62   | 9.64   | 1.29E-01 | -3.51  | 12.53 | 7.79E-01 | 13.38  | 11.72 | 2.54E-01 |
| cg06073141 | -13.16 | 4.63  | 4.49E-03 | -13.39  | 13.63 | 3.26E-01 | 1.12    | 19.93  | 9.55E-01 | -13.33 | 5.28  | 1.16E-02 | -22.97 | 18.54 | 2.16E-01 |
| cg16473511 | 35.74  | 12.58 | 4.49E-03 | 23.57   | 22.66 | 2.98E-01 | -104.60 | 147.49 | 4.78E-01 | 44.19  | 16.07 | 5.95E-03 | 29.98  | 46.95 | 5.23E-01 |

|               |        |       |          |        |       |          |         |        |          |        |       |          |         |       |          |
|---------------|--------|-------|----------|--------|-------|----------|---------|--------|----------|--------|-------|----------|---------|-------|----------|
| cg25960378    | 7.15   | 2.52  | 4.50E-03 | 7.89   | 3.68  | 3.19E-02 | 4.48    | 5.69   | 4.31E-01 | 1.60   | 6.77  | 8.14E-01 | 11.94   | 5.67  | 3.51E-02 |
| cg21496913    | 20.61  | 7.25  | 4.50E-03 | 26.03  | 26.08 | 3.18E-01 | -94.39  | 120.08 | 4.32E-01 | 20.73  | 7.77  | 7.67E-03 | 18.40   | 33.04 | 5.78E-01 |
| cg09973663    | -30.53 | 10.75 | 4.51E-03 | -34.38 | 22.11 | 1.20E-01 | 7.25    | 47.96  | 8.80E-01 | -29.01 | 13.88 | 3.67E-02 | -47.20  | 31.84 | 1.38E-01 |
| cg18996153    | -28.26 | 9.95  | 4.51E-03 | -25.40 | 15.19 | 9.46E-02 | -32.49  | 31.49  | 3.02E-01 | -32.33 | 17.31 | 6.18E-02 | -24.46  | 26.56 | 3.57E-01 |
| cg18034049    | -15.57 | 5.48  | 4.51E-03 | -25.44 | 15.61 | 1.03E-01 | -5.93   | 20.53  | 7.73E-01 | -16.01 | 6.47  | 1.34E-02 | -5.96   | 18.53 | 7.48E-01 |
| cg26846726    | -41.14 | 14.48 | 4.51E-03 | -45.73 | 18.36 | 1.28E-02 | -79.50  | 45.16  | 7.84E-02 | -26.11 | 43.97 | 5.53E-01 | -10.01  | 35.53 | 7.78E-01 |
| cg06038358    | -49.30 | 17.36 | 4.51E-03 | -47.25 | 23.24 | 4.20E-02 | 27.78   | 80.21  | 7.29E-01 | -46.59 | 35.68 | 1.92E-01 | -83.43  | 43.65 | 5.60E-02 |
| cg08288703    | -12.34 | 4.35  | 4.52E-03 | -16.35 | 6.29  | 9.33E-03 | -9.73   | 10.73  | 3.65E-01 | -13.73 | 12.18 | 2.60E-01 | -5.15   | 9.03  | 5.68E-01 |
| cg23615572    | -27.59 | 9.72  | 4.52E-03 | -31.57 | 15.86 | 4.66E-02 | 2.83    | 26.39  | 9.15E-01 | -29.09 | 18.96 | 1.25E-01 | -37.50  | 20.43 | 6.64E-02 |
| cg21745184    | 33.14  | 11.67 | 4.52E-03 | 28.84  | 14.47 | 4.63E-02 | 37.87   | 54.15  | 4.84E-01 | 98.03  | 44.86 | 2.89E-02 | 25.42   | 24.05 | 2.91E-01 |
| cg16806210    | 22.86  | 8.05  | 4.52E-03 | 17.67  | 12.78 | 1.67E-01 | 18.86   | 14.47  | 1.92E-01 | 46.41  | 21.44 | 3.04E-02 | 22.72   | 20.65 | 2.71E-01 |
| ch.8.1995451R | -28.07 | 9.89  | 4.53E-03 | -27.54 | 15.93 | 8.39E-02 | -36.46  | 17.91  | 4.18E-02 | 0.97   | 27.19 | 9.72E-01 | -36.43  | 23.44 | 1.20E-01 |
| cg10983752    | -11.93 | 4.20  | 4.53E-03 | -5.52  | 8.53  | 5.17E-01 | -7.33   | 9.87   | 4.58E-01 | -16.65 | 6.57  | 1.12E-02 | -14.63  | 10.29 | 1.55E-01 |
| cg16600934    | 19.74  | 6.95  | 4.53E-03 | 30.70  | 16.24 | 5.87E-02 | 17.33   | 14.59  | 2.35E-01 | 12.55  | 9.81  | 2.01E-01 | 44.56   | 23.62 | 5.92E-02 |
| cg02227969    | -36.03 | 12.70 | 4.54E-03 | -38.89 | 15.91 | 1.45E-02 | 2.15    | 70.90  | 9.76E-01 | -49.59 | 43.10 | 2.50E-01 | -28.78  | 25.67 | 2.62E-01 |
| cg24482850    | 11.81  | 4.16  | 4.54E-03 | 19.09  | 7.76  | 1.40E-02 | 15.70   | 9.81   | 1.09E-01 | 3.23   | 6.21  | 6.03E-01 | 17.03   | 10.21 | 9.53E-02 |
| cg10973622    | 4.94   | 1.74  | 4.54E-03 | 5.97   | 2.99  | 4.56E-02 | 5.25    | 4.22   | 2.13E-01 | 6.22   | 2.97  | 3.65E-02 | -0.81   | 4.56  | 8.59E-01 |
| cg00613284    | -14.31 | 5.04  | 4.54E-03 | -11.71 | 9.01  | 1.93E-01 | -23.60  | 13.96  | 9.10E-02 | -16.81 | 7.94  | 3.43E-02 | -5.11   | 12.89 | 6.92E-01 |
| cg08289409    | 30.71  | 10.82 | 4.55E-03 | 43.63  | 30.43 | 1.52E-01 | 27.82   | 107.00 | 7.95E-01 | 30.94  | 12.17 | 1.10E-02 | 6.25    | 40.00 | 8.76E-01 |
| cg26635366    | -60.02 | 21.16 | 4.56E-03 | -39.92 | 61.47 | 5.16E-01 | -29.59  | 250.86 | 9.06E-01 | -53.10 | 24.45 | 2.99E-02 | -122.09 | 59.75 | 4.10E-02 |
| cg00514684    | 33.92  | 11.96 | 4.56E-03 | 44.41  | 14.00 | 1.52E-03 | -3.57   | 58.80  | 9.52E-01 | -33.21 | 69.03 | 6.31E-01 | 13.46   | 26.77 | 6.15E-01 |
| cg22862529    | 18.18  | 6.41  | 4.56E-03 | 36.06  | 17.20 | 3.61E-02 | 29.18   | 20.34  | 1.51E-01 | 15.99  | 7.77  | 3.95E-02 | -7.61   | 22.56 | 7.36E-01 |
| cg02902102    | -9.64  | 3.40  | 4.57E-03 | -12.66 | 5.09  | 1.28E-02 | -11.65  | 6.95   | 9.37E-02 | 7.25   | 12.38 | 5.58E-01 | -7.31   | 6.96  | 2.93E-01 |
| cg03392965    | -15.56 | 5.49  | 4.57E-03 | -20.75 | 7.94  | 8.94E-03 | -14.04  | 13.21  | 2.88E-01 | -0.21  | 17.85 | 9.91E-01 | -12.54  | 10.85 | 2.48E-01 |
| cg12879386    | -25.17 | 8.88  | 4.57E-03 | 3.48   | 30.28 | 9.09E-01 | -87.99  | 78.62  | 2.63E-01 | -28.36 | 10.13 | 5.11E-03 | -19.25  | 24.31 | 4.28E-01 |
| cg19430577    | 31.19  | 11.00 | 4.58E-03 | 64.15  | 32.52 | 4.85E-02 | 87.49   | 91.37  | 3.38E-01 | 28.65  | 13.01 | 2.76E-02 | 13.40   | 27.85 | 6.30E-01 |
| cg00907842    | 7.83   | 2.76  | 4.59E-03 | 7.04   | 3.56  | 4.77E-02 | 13.22   | 7.06   | 6.13E-02 | 12.20  | 10.10 | 2.27E-01 | 3.84    | 6.70  | 5.67E-01 |
| cg06943925    | 28.79  | 10.16 | 4.59E-03 | 56.51  | 18.80 | 2.65E-03 | -7.58   | 29.92  | 8.00E-01 | 24.46  | 8.90  | 5.97E-03 | 28.25   | 28.43 | 3.20E-01 |
| cg15257719    | -11.32 | 3.99  | 4.59E-03 | -22.98 | 9.62  | 1.70E-02 | -10.91  | 19.61  | 5.78E-01 | -10.14 | 4.90  | 3.84E-02 | -1.38   | 11.46 | 9.04E-01 |
| cg08259958    | 37.50  | 13.23 | 4.60E-03 | 21.79  | 25.58 | 3.94E-01 | 94.68   | 144.64 | 5.13E-01 | 41.37  | 17.00 | 1.50E-02 | 49.12   | 38.44 | 2.01E-01 |
| cg09303778    | -15.91 | 5.62  | 4.60E-03 | -33.91 | 14.84 | 2.23E-02 | -12.18  | 32.92  | 7.11E-01 | -14.22 | 6.38  | 2.59E-02 | 5.74    | 24.29 | 8.13E-01 |
| cg14975061    | -14.46 | 5.10  | 4.60E-03 | -17.18 | 10.51 | 1.02E-01 | 2.53    | 14.43  | 8.61E-01 | -15.56 | 7.34  | 3.39E-02 | -20.61  | 12.97 | 1.12E-01 |
| cg02841875    | 25.66  | 9.06  | 4.60E-03 | 35.32  | 14.16 | 1.26E-02 | 28.99   | 22.56  | 1.99E-01 | 13.91  | 16.41 | 3.97E-01 | 18.42   | 25.57 | 4.71E-01 |
| cg27329548    | 54.33  | 19.18 | 4.61E-03 | 57.74  | 55.71 | 3.00E-01 | -227.41 | 270.60 | 4.01E-01 | 61.85  | 21.11 | 3.39E-03 | -46.76  | 84.64 | 5.81E-01 |
| cg09757644    | -12.41 | 4.38  | 4.61E-03 | -19.72 | 6.63  | 2.91E-03 | -2.41   | 10.05  | 8.10E-01 | -5.94  | 11.79 | 6.15E-01 | -10.69  | 9.03  | 2.37E-01 |

|            |        |       |          |        |       |          |         |        |          |         |       |          |        |       |          |
|------------|--------|-------|----------|--------|-------|----------|---------|--------|----------|---------|-------|----------|--------|-------|----------|
| cg13608733 | 15.82  | 5.58  | 4.61E-03 | 25.03  | 10.44 | 1.66E-02 | 11.98   | 14.49  | 4.08E-01 | 14.49   | 10.20 | 1.55E-01 | 9.56   | 10.84 | 3.78E-01 |
| cg26419728 | 35.19  | 12.42 | 4.62E-03 | 37.98  | 24.76 | 1.25E-01 | 79.09   | 40.23  | 4.93E-02 | 23.72   | 18.69 | 2.04E-01 | 35.99  | 27.00 | 1.83E-01 |
| cg11338420 | 39.43  | 13.92 | 4.62E-03 | 48.33  | 17.83 | 6.73E-03 | 18.39   | 17.74  | 3.00E-01 | 19.06   | 18.88 | 3.13E-01 | 85.05  | 25.16 | 7.23E-04 |
| cg01055518 | -8.38  | 2.96  | 4.62E-03 | -9.16  | 5.27  | 8.25E-02 | -12.07  | 7.27   | 9.67E-02 | -4.68   | 4.91  | 3.40E-01 | -11.48 | 7.48  | 1.25E-01 |
| cg13011388 | 19.92  | 7.03  | 4.62E-03 | 20.06  | 16.15 | 2.14E-01 | -1.92   | 19.57  | 9.22E-01 | 27.12   | 11.82 | 2.17E-02 | 20.67  | 12.30 | 9.30E-02 |
| cg08506260 | 69.02  | 24.37 | 4.63E-03 | 59.22  | 59.59 | 3.20E-01 | -300.62 | 307.55 | 3.28E-01 | 65.99   | 28.85 | 2.21E-02 | 123.37 | 72.62 | 8.93E-02 |
| cg14024243 | -16.37 | 5.78  | 4.63E-03 | -32.22 | 15.33 | 3.56E-02 | -17.23  | 12.88  | 1.81E-01 | -13.00  | 7.64  | 8.86E-02 | -10.39 | 20.06 | 6.04E-01 |
| cg22014834 | -24.76 | 8.74  | 4.63E-03 | -17.23 | 22.30 | 4.40E-01 | -10.62  | 47.62  | 8.24E-01 | -28.99  | 10.16 | 4.30E-03 | -3.67  | 32.70 | 9.11E-01 |
| cg00135416 | 21.71  | 7.67  | 4.63E-03 | 19.06  | 13.20 | 1.49E-01 | 3.40    | 13.72  | 8.04E-01 | 30.43   | 13.36 | 2.27E-02 | 41.61  | 18.21 | 2.23E-02 |
| cg11429111 | -10.99 | 3.88  | 4.63E-03 | -15.84 | 5.57  | 4.48E-03 | -1.29   | 8.91   | 8.85E-01 | -6.52   | 9.69  | 5.01E-01 | -12.26 | 9.58  | 2.00E-01 |
| cg20025824 | 26.58  | 9.39  | 4.63E-03 | 37.71  | 18.92 | 4.62E-02 | 32.46   | 19.59  | 9.76E-02 | 21.06   | 14.31 | 1.41E-01 | 8.31   | 30.64 | 7.86E-01 |
| cg03342032 | -12.32 | 4.35  | 4.63E-03 | -12.27 | 10.54 | 2.44E-01 | -13.80  | 17.79  | 4.38E-01 | -10.31  | 5.31  | 5.23E-02 | -25.10 | 13.82 | 6.94E-02 |
| cg23250374 | 38.62  | 13.64 | 4.64E-03 | 27.57  | 32.27 | 3.93E-01 | 0.45    | 126.84 | 9.97E-01 | 47.28   | 15.90 | 2.95E-03 | -14.90 | 50.19 | 7.67E-01 |
| cg11081833 | 14.91  | 5.27  | 4.64E-03 | 14.85  | 8.38  | 7.65E-02 | 21.68   | 11.17  | 5.22E-02 | 12.74   | 12.45 | 3.06E-01 | 9.56   | 11.67 | 4.13E-01 |
| cg01724150 | 16.99  | 6.00  | 4.64E-03 | 20.11  | 8.00  | 1.19E-02 | 18.24   | 16.32  | 2.64E-01 | 45.29   | 29.26 | 1.22E-01 | 4.98   | 11.79 | 6.73E-01 |
| cg10768875 | -16.36 | 5.78  | 4.64E-03 | -29.34 | 14.28 | 3.99E-02 | -38.57  | 24.82  | 1.20E-01 | -11.90  | 6.94  | 8.66E-02 | -13.69 | 19.36 | 4.80E-01 |
| cg07950220 | 23.09  | 8.16  | 4.64E-03 | 16.74  | 20.07 | 4.04E-01 | -30.87  | 38.01  | 4.17E-01 | 29.11   | 9.89  | 3.24E-03 | 17.90  | 24.84 | 4.71E-01 |
| cg11265516 | -53.97 | 19.07 | 4.64E-03 | -58.59 | 28.58 | 4.04E-02 | 10.24   | 64.74  | 8.74E-01 | -104.58 | 42.43 | 1.37E-02 | -28.80 | 36.93 | 4.36E-01 |
| cg03265037 | 23.14  | 8.18  | 4.65E-03 | 24.04  | 19.21 | 2.11E-01 | 25.13   | 20.52  | 2.21E-01 | 21.11   | 10.99 | 5.48E-02 | 29.25  | 25.05 | 2.43E-01 |
| cg26332258 | -67.51 | 23.85 | 4.65E-03 | -64.80 | 49.67 | 1.92E-01 | -127.49 | 253.38 | 6.15E-01 | -72.38  | 29.75 | 1.50E-02 | -41.75 | 69.45 | 5.48E-01 |
| cg09219813 | 30.21  | 10.67 | 4.65E-03 | 36.87  | 12.34 | 2.81E-03 | -30.41  | 46.94  | 5.17E-01 | 70.93   | 65.94 | 2.82E-01 | 13.42  | 25.61 | 6.00E-01 |
| cg21541833 | 14.98  | 5.29  | 4.66E-03 | 21.49  | 14.63 | 1.42E-01 | 82.02   | 59.36  | 1.67E-01 | 15.02   | 6.24  | 1.61E-02 | 4.95   | 14.11 | 7.26E-01 |
| cg13931707 | -11.34 | 4.01  | 4.66E-03 | -9.41  | 8.17  | 2.50E-01 | -21.09  | 14.87  | 1.56E-01 | -9.33   | 5.20  | 7.30E-02 | -21.55 | 13.14 | 1.01E-01 |
| cg07685977 | -16.45 | 5.81  | 4.67E-03 | -16.86 | 10.27 | 1.01E-01 | -13.10  | 12.54  | 2.96E-01 | -14.63  | 11.12 | 1.88E-01 | -22.11 | 13.30 | 9.65E-02 |
| cg23520688 | -33.55 | 11.86 | 4.67E-03 | -36.40 | 17.59 | 3.85E-02 | -4.81   | 26.71  | 8.57E-01 | -47.40  | 30.31 | 1.18E-01 | -45.12 | 26.86 | 9.31E-02 |
| cg06912939 | 24.64  | 8.71  | 4.68E-03 | 20.95  | 15.70 | 1.82E-01 | 34.38   | 16.34  | 3.55E-02 | 11.09   | 17.93 | 5.36E-01 | 33.79  | 21.02 | 1.08E-01 |
| cg08330404 | 30.09  | 10.64 | 4.68E-03 | 30.38  | 19.72 | 1.24E-01 | 19.36   | 31.55  | 5.40E-01 | 35.29   | 16.83 | 3.59E-02 | 25.28  | 24.08 | 2.94E-01 |
| cg04031465 | 25.70  | 9.09  | 4.68E-03 | 17.86  | 20.49 | 3.84E-01 | 69.95   | 44.69  | 1.18E-01 | 24.08   | 11.12 | 3.03E-02 | 34.10  | 29.61 | 2.50E-01 |
| cg14430698 | -12.85 | 4.54  | 4.69E-03 | -13.67 | 9.64  | 1.56E-01 | -34.68  | 19.26  | 7.17E-02 | -10.45  | 5.79  | 7.09E-02 | -13.64 | 13.99 | 3.30E-01 |
| cg13700094 | -17.62 | 6.23  | 4.69E-03 | -37.00 | 18.24 | 4.25E-02 | -28.15  | 25.58  | 2.71E-01 | -13.90  | 7.24  | 5.49E-02 | -16.08 | 21.68 | 4.58E-01 |
| cg11359720 | 7.22   | 2.55  | 4.69E-03 | 8.71   | 3.48  | 1.23E-02 | 2.57    | 5.97   | 6.67E-01 | 4.75    | 9.48  | 6.16E-01 | 8.30   | 5.61  | 1.39E-01 |
| cg02588889 | -7.93  | 2.81  | 4.69E-03 | -10.23 | 3.93  | 9.21E-03 | -2.53   | 6.41   | 6.93E-01 | -9.94   | 10.83 | 3.58E-01 | -6.76  | 5.84  | 2.47E-01 |
| cg23901918 | 9.14   | 3.23  | 4.70E-03 | 16.11  | 4.58  | 4.34E-04 | 5.47    | 5.95   | 3.58E-01 | 7.14    | 6.92  | 3.02E-01 | 2.90   | 6.58  | 6.60E-01 |
| cg11148581 | -46.97 | 16.61 | 4.70E-03 | -70.65 | 25.97 | 6.53E-03 | 29.51   | 91.51  | 7.47E-01 | -41.14  | 25.00 | 9.98E-02 | -7.43  | 48.74 | 8.79E-01 |
| cg07396827 | -18.21 | 6.44  | 4.70E-03 | -8.51  | 15.70 | 5.88E-01 | -15.47  | 25.32  | 5.41E-01 | -18.97  | 7.90  | 1.63E-02 | -31.19 | 20.28 | 1.24E-01 |

|            |        |       |          |        |       |          |         |        |          |        |       |          |        |       |          |
|------------|--------|-------|----------|--------|-------|----------|---------|--------|----------|--------|-------|----------|--------|-------|----------|
| cg25250717 | 15.33  | 5.43  | 4.71E-03 | 17.75  | 15.56 | 2.54E-01 | 24.07   | 8.28   | 3.65E-03 | 8.14   | 8.59  | 3.44E-01 | -7.94  | 24.13 | 7.42E-01 |
| cg11361201 | 10.59  | 3.75  | 4.72E-03 | 14.25  | 5.05  | 4.78E-03 | 11.99   | 9.38   | 2.01E-01 | 11.03  | 10.80 | 3.07E-01 | -2.97  | 9.13  | 7.45E-01 |
| cg20674174 | -17.01 | 6.02  | 4.72E-03 | -19.31 | 16.39 | 2.39E-01 | -32.92  | 33.25  | 3.22E-01 | -13.26 | 6.95  | 5.64E-02 | -41.30 | 21.05 | 4.98E-02 |
| cg18646864 | 21.32  | 7.55  | 4.72E-03 | 20.70  | 11.38 | 6.89E-02 | 29.71   | 15.92  | 6.21E-02 | 23.61  | 17.50 | 1.77E-01 | 7.71   | 19.51 | 6.93E-01 |
| cg01272393 | -16.89 | 5.98  | 4.73E-03 | -2.00  | 19.53 | 9.19E-01 | -25.70  | 25.04  | 3.05E-01 | -18.92 | 6.69  | 4.70E-03 | -2.70  | 26.51 | 9.19E-01 |
| cg01831771 | -27.93 | 9.89  | 4.73E-03 | -29.74 | 15.93 | 6.19E-02 | 10.61   | 45.29  | 8.15E-01 | -27.98 | 17.61 | 1.12E-01 | -32.36 | 19.68 | 1.00E-01 |
| cg27342720 | -9.88  | 3.50  | 4.73E-03 | -17.39 | 7.62  | 2.24E-02 | -16.10  | 12.39  | 1.94E-01 | -8.41  | 4.56  | 6.48E-02 | 0.24   | 10.10 | 9.81E-01 |
| cg09301222 | 18.12  | 6.41  | 4.73E-03 | 0.77   | 21.35 | 9.71E-01 | 26.00   | 57.08  | 6.49E-01 | 20.54  | 6.96  | 3.16E-03 | 5.61   | 29.55 | 8.50E-01 |
| cg19942977 | -12.71 | 4.50  | 4.74E-03 | -2.08  | 12.43 | 8.67E-01 | 2.76    | 22.30  | 9.02E-01 | -16.40 | 5.23  | 1.69E-03 | -4.43  | 15.24 | 7.71E-01 |
| cg02127689 | -17.58 | 6.23  | 4.74E-03 | -17.95 | 9.43  | 5.69E-02 | -16.80  | 13.71  | 2.20E-01 | -10.29 | 15.54 | 5.08E-01 | -23.50 | 14.01 | 9.35E-02 |
| cg13790810 | -16.99 | 6.02  | 4.75E-03 | -19.23 | 12.40 | 1.21E-01 | -28.28  | 15.50  | 6.81E-02 | -9.86  | 9.10  | 2.79E-01 | -21.96 | 14.29 | 1.24E-01 |
| cg14339007 | 34.99  | 12.39 | 4.75E-03 | 37.78  | 17.46 | 3.05E-02 | 22.82   | 26.18  | 3.84E-01 | 82.75  | 43.92 | 5.95E-02 | 22.12  | 28.21 | 4.33E-01 |
| cg05401965 | 22.33  | 7.91  | 4.75E-03 | 28.73  | 12.43 | 2.08E-02 | 0.31    | 21.15  | 9.88E-01 | 34.74  | 22.07 | 1.15E-01 | 18.94  | 13.83 | 1.71E-01 |
| cg03366574 | -13.71 | 4.85  | 4.75E-03 | -18.60 | 6.84  | 6.58E-03 | -8.27   | 10.40  | 4.27E-01 | 1.94   | 16.45 | 9.06E-01 | -14.17 | 11.09 | 2.02E-01 |
| cg10692932 | -46.13 | 16.34 | 4.76E-03 | -38.33 | 32.45 | 2.38E-01 | -432.79 | 249.84 | 8.32E-02 | -42.63 | 19.86 | 3.19E-02 | -87.11 | 63.76 | 1.72E-01 |
| cg18730437 | 22.57  | 7.99  | 4.76E-03 | 11.04  | 15.03 | 4.63E-01 | 6.15    | 38.00  | 8.71E-01 | 28.99  | 10.68 | 6.67E-03 | 26.07  | 23.79 | 2.73E-01 |
| cg06609646 | -16.30 | 5.78  | 4.76E-03 | -22.19 | 15.18 | 1.44E-01 | -52.21  | 27.50  | 5.76E-02 | -12.81 | 6.73  | 5.72E-02 | -18.10 | 21.01 | 3.89E-01 |
| cg19255333 | -38.11 | 13.50 | 4.76E-03 | -24.10 | 19.45 | 2.15E-01 | 18.90   | 52.42  | 7.18E-01 | -52.85 | 27.97 | 5.88E-02 | -66.24 | 27.02 | 1.42E-02 |
| cg10800369 | -7.68  | 2.72  | 4.77E-03 | -13.44 | 4.39  | 2.22E-03 | -4.73   | 6.31   | 4.54E-01 | -5.12  | 5.24  | 3.29E-01 | -1.63  | 6.80  | 8.10E-01 |
| cg05682094 | 64.23  | 22.76 | 4.77E-03 | 75.95  | 28.16 | 7.01E-03 | -129.99 | 138.83 | 3.49E-01 | 76.39  | 88.08 | 3.86E-01 | 51.42  | 45.21 | 2.55E-01 |
| cg11588903 | 11.02  | 3.91  | 4.77E-03 | 12.32  | 5.98  | 3.93E-02 | 18.52   | 8.53   | 2.99E-02 | 6.82   | 8.09  | 3.99E-01 | 2.25   | 10.79 | 8.35E-01 |
| cg19201019 | 37.25  | 13.20 | 4.78E-03 | 45.23  | 15.68 | 3.92E-03 | 41.69   | 18.53  | 2.45E-02 | 8.41   | 12.71 | 5.08E-01 | 72.71  | 25.66 | 4.60E-03 |
| cg02300377 | 33.12  | 11.74 | 4.78E-03 | 27.83  | 17.21 | 1.06E-01 | 34.62   | 31.75  | 2.76E-01 | 53.01  | 28.55 | 6.34E-02 | 28.30  | 24.55 | 2.49E-01 |
| cg27070808 | 17.89  | 6.34  | 4.78E-03 | 23.99  | 19.68 | 2.23E-01 | 30.33   | 27.68  | 2.73E-01 | 16.11  | 7.10  | 2.32E-02 | 21.00  | 29.91 | 4.83E-01 |
| cg15344504 | -10.60 | 3.76  | 4.79E-03 | -7.07  | 7.40  | 3.39E-01 | -8.41   | 9.44   | 3.73E-01 | -12.12 | 5.46  | 2.64E-02 | -15.58 | 11.38 | 1.71E-01 |
| cg00436254 | 24.92  | 8.83  | 4.79E-03 | 30.13  | 15.31 | 4.90E-02 | 14.06   | 15.98  | 3.79E-01 | 24.23  | 21.23 | 2.54E-01 | 33.99  | 20.37 | 9.52E-02 |
| cg02030452 | -17.13 | 6.07  | 4.79E-03 | -4.55  | 17.45 | 7.94E-01 | -31.58  | 29.35  | 2.82E-01 | -17.63 | 6.82  | 9.76E-03 | -28.56 | 28.88 | 3.23E-01 |
| cg03604930 | -16.88 | 5.98  | 4.79E-03 | -19.41 | 10.00 | 5.23E-02 | -14.71  | 12.54  | 2.41E-01 | -6.38  | 13.97 | 6.48E-01 | -23.40 | 12.44 | 5.99E-02 |
| cg22532843 | 32.93  | 11.67 | 4.79E-03 | 30.64  | 15.81 | 5.26E-02 | -2.43   | 52.40  | 9.63E-01 | 78.63  | 65.20 | 2.28E-01 | 37.06  | 19.12 | 5.26E-02 |
| cg03107393 | 17.69  | 6.27  | 4.79E-03 | 12.74  | 8.34  | 1.27E-01 | 21.07   | 16.44  | 2.00E-01 | 33.70  | 24.81 | 1.74E-01 | 23.36  | 13.20 | 7.69E-02 |
| cg23030159 | 10.23  | 3.63  | 4.79E-03 | 6.92   | 5.35  | 1.96E-01 | 18.19   | 7.23   | 1.19E-02 | 14.81  | 11.27 | 1.89E-01 | 5.08   | 8.40  | 5.45E-01 |
| cg22426397 | -33.39 | 11.84 | 4.80E-03 | -34.29 | 15.30 | 2.50E-02 | -48.15  | 31.49  | 1.26E-01 | -19.49 | 37.70 | 6.05E-01 | -25.60 | 29.53 | 3.86E-01 |
| cg14370653 | -13.45 | 4.77  | 4.81E-03 | -27.51 | 16.18 | 8.90E-02 | -25.07  | 24.67  | 3.10E-01 | -12.87 | 5.24  | 1.41E-02 | 11.27  | 21.87 | 6.06E-01 |
| cg20387341 | 29.10  | 10.32 | 4.81E-03 | 39.99  | 16.73 | 1.68E-02 | 31.21   | 36.89  | 3.98E-01 | 31.20  | 20.33 | 1.25E-01 | 11.97  | 19.39 | 5.37E-01 |
| cg03006588 | 25.49  | 9.04  | 4.81E-03 | 22.78  | 15.97 | 1.54E-01 | 30.84   | 18.16  | 8.94E-02 | 19.07  | 15.63 | 2.23E-01 | 42.92  | 29.01 | 1.39E-01 |

|            |        |       |          |         |       |          |         |        |          |        |       |          |        |       |          |
|------------|--------|-------|----------|---------|-------|----------|---------|--------|----------|--------|-------|----------|--------|-------|----------|
| cg16002660 | -13.72 | 4.87  | 4.81E-03 | -16.81  | 10.91 | 1.23E-01 | -30.48  | 16.75  | 6.88E-02 | -7.92  | 6.52  | 2.24E-01 | -21.39 | 12.24 | 8.05E-02 |
| cg21157904 | 12.45  | 4.42  | 4.82E-03 | 11.58   | 5.49  | 3.49E-02 | 26.77   | 11.98  | 2.54E-02 | 3.12   | 19.23 | 8.71E-01 | 7.02   | 10.93 | 5.21E-01 |
| cg21151163 | -11.92 | 4.23  | 4.82E-03 | -7.02   | 6.66  | 2.91E-01 | -10.95  | 8.54   | 1.99E-01 | -22.27 | 6.48  | 5.96E-04 | -4.30  | 8.54  | 6.15E-01 |
| cg13849253 | 19.78  | 7.02  | 4.82E-03 | 32.04   | 12.57 | 1.08E-02 | 27.19   | 13.93  | 5.09E-02 | 22.77  | 12.34 | 6.49E-02 | 2.17   | 10.97 | 8.43E-01 |
| cg05539265 | -13.00 | 4.61  | 4.82E-03 | -27.08  | 11.12 | 1.49E-02 | -18.38  | 17.84  | 3.03E-01 | -8.93  | 5.75  | 1.20E-01 | -11.59 | 13.38 | 3.86E-01 |
| cg02658668 | -19.32 | 6.86  | 4.82E-03 | -29.44  | 13.16 | 2.52E-02 | 17.46   | 30.16  | 5.63E-01 | -15.07 | 7.31  | 3.91E-02 | -39.51 | 21.07 | 6.07E-02 |
| cg11554728 | 18.35  | 6.51  | 4.82E-03 | 22.55   | 11.27 | 4.54E-02 | 21.80   | 11.98  | 6.88E-02 | 15.78  | 14.09 | 2.63E-01 | 6.48   | 16.39 | 6.93E-01 |
| cg26165853 | -34.73 | 12.32 | 4.83E-03 | -40.11  | 16.68 | 1.62E-02 | -37.61  | 46.71  | 4.21E-01 | -99.65 | 66.92 | 1.36E-01 | -19.49 | 20.81 | 3.49E-01 |
| cg07565028 | 23.46  | 8.32  | 4.83E-03 | 14.52   | 21.29 | 4.95E-01 | 20.30   | 33.61  | 5.46E-01 | 28.98  | 9.86  | 3.28E-03 | -9.22  | 30.87 | 7.65E-01 |
| cg20060632 | 14.03  | 4.98  | 4.83E-03 | 30.21   | 11.04 | 6.19E-03 | 12.62   | 13.94  | 3.65E-01 | 10.21  | 6.39  | 1.10E-01 | 1.08   | 20.06 | 9.57E-01 |
| cg00886554 | 34.45  | 12.23 | 4.84E-03 | 40.86   | 18.21 | 2.49E-02 | 27.96   | 29.03  | 3.35E-01 | 74.89  | 47.72 | 1.17E-01 | 20.10  | 22.11 | 3.63E-01 |
| cg22904406 | 11.86  | 4.21  | 4.85E-03 | 10.43   | 5.52  | 5.87E-02 | 15.54   | 9.53   | 1.03E-01 | 15.28  | 14.87 | 3.04E-01 | 10.76  | 11.16 | 3.35E-01 |
| cg10253371 | 20.77  | 7.37  | 4.85E-03 | 26.97   | 11.41 | 1.81E-02 | 4.50    | 19.30  | 8.16E-01 | 53.97  | 25.84 | 3.68E-02 | 13.20  | 11.84 | 2.65E-01 |
| cg08519233 | -29.78 | 10.57 | 4.85E-03 | -39.24  | 17.89 | 2.83E-02 | -56.58  | 26.61  | 3.35E-02 | -13.22 | 20.19 | 5.13E-01 | -16.09 | 22.59 | 4.76E-01 |
| cg20730198 | 14.45  | 5.13  | 4.85E-03 | 15.02   | 7.25  | 3.84E-02 | -0.65   | 17.68  | 9.70E-01 | 13.74  | 24.15 | 5.69E-01 | 17.19  | 8.43  | 4.13E-02 |
| cg27038472 | 23.18  | 8.23  | 4.85E-03 | 25.65   | 21.26 | 2.28E-01 | 24.56   | 20.98  | 2.42E-01 | 16.74  | 10.03 | 9.52E-02 | 73.70  | 31.18 | 1.81E-02 |
| cg12746717 | 31.14  | 11.06 | 4.85E-03 | 40.80   | 31.77 | 1.99E-01 | 67.78   | 85.76  | 4.29E-01 | 27.72  | 12.43 | 2.57E-02 | 44.13  | 41.41 | 2.87E-01 |
| cg01676795 | 7.38   | 2.62  | 4.86E-03 | 7.13    | 3.60  | 4.75E-02 | 10.33   | 6.56   | 1.16E-01 | 11.09  | 6.06  | 6.71E-02 | -1.00  | 7.46  | 8.93E-01 |
| cg08833010 | -19.30 | 6.85  | 4.87E-03 | -19.53  | 10.76 | 6.97E-02 | -26.14  | 24.57  | 2.87E-01 | -26.41 | 11.31 | 1.95E-02 | 2.43   | 17.77 | 8.91E-01 |
| cg06456738 | 10.25  | 3.64  | 4.87E-03 | 9.72    | 4.92  | 4.79E-02 | 19.94   | 7.97   | 1.23E-02 | 16.78  | 16.65 | 3.14E-01 | 1.17   | 7.65  | 8.79E-01 |
| cg11822964 | 13.69  | 4.86  | 4.87E-03 | 12.25   | 7.43  | 9.93E-02 | 19.46   | 9.10   | 3.25E-02 | 7.81   | 13.01 | 5.48E-01 | 12.26  | 12.70 | 3.34E-01 |
| cg17115737 | 12.83  | 4.56  | 4.88E-03 | 19.91   | 6.01  | 9.20E-04 | 14.51   | 9.18   | 1.14E-01 | 1.00   | 9.27  | 9.14E-01 | 5.09   | 12.52 | 6.85E-01 |
| cg16478536 | 9.45   | 3.36  | 4.88E-03 | 6.62    | 5.04  | 1.89E-01 | 18.29   | 7.09   | 9.93E-03 | 9.01   | 10.28 | 3.81E-01 | 6.44   | 7.08  | 3.63E-01 |
| cg12494529 | -15.64 | 5.56  | 4.90E-03 | -26.04  | 8.05  | 1.22E-03 | -2.70   | 11.81  | 8.19E-01 | -5.49  | 12.52 | 6.61E-01 | -17.47 | 9.86  | 7.65E-02 |
| cg19719807 | 13.09  | 4.65  | 4.91E-03 | 17.24   | 6.83  | 1.16E-02 | 20.87   | 11.13  | 6.08E-02 | 9.33   | 12.02 | 4.37E-01 | 0.19   | 10.12 | 9.85E-01 |
| cg00774088 | -32.19 | 11.44 | 4.91E-03 | -36.97  | 12.89 | 4.15E-03 | -87.84  | 51.85  | 9.03E-02 | -39.11 | 26.87 | 1.46E-01 | 2.56   | 25.08 | 9.19E-01 |
| cg10599362 | -61.83 | 21.98 | 4.91E-03 | -101.69 | 51.45 | 4.81E-02 | -166.49 | 259.32 | 5.21E-01 | -53.59 | 25.93 | 3.88E-02 | -38.97 | 72.51 | 5.91E-01 |
| cg18108716 | 37.48  | 13.33 | 4.91E-03 | 25.77   | 30.51 | 3.98E-01 | 97.84   | 120.11 | 4.15E-01 | 41.50  | 16.29 | 1.08E-02 | 28.06  | 37.36 | 4.53E-01 |
| cg03681150 | 36.28  | 12.90 | 4.92E-03 | 43.22   | 18.88 | 2.21E-02 | 13.73   | 28.87  | 6.34E-01 | 52.39  | 37.06 | 1.57E-01 | 33.05  | 28.00 | 2.38E-01 |
| cg01359532 | -11.73 | 4.17  | 4.92E-03 | -12.67  | 7.14  | 7.60E-02 | -12.55  | 8.89   | 1.58E-01 | -4.67  | 8.78  | 5.95E-01 | -16.85 | 9.04  | 6.22E-02 |
| cg01697354 | 40.38  | 14.36 | 4.92E-03 | 35.43   | 16.45 | 3.12E-02 | 69.95   | 70.74  | 3.23E-01 | 67.69  | 62.68 | 2.80E-01 | 48.11  | 37.77 | 2.03E-01 |
| cg17018021 | 26.75  | 9.51  | 4.92E-03 | 16.17   | 15.65 | 3.02E-01 | 20.01   | 21.98  | 3.63E-01 | 40.04  | 22.04 | 6.93E-02 | 37.25  | 18.76 | 4.71E-02 |
| cg26160945 | 8.57   | 3.05  | 4.92E-03 | 11.31   | 4.30  | 8.54E-03 | 3.28    | 7.82   | 6.75E-01 | 12.55  | 6.66  | 5.94E-02 | -1.75  | 8.25  | 8.32E-01 |
| cg10541813 | 28.56  | 10.16 | 4.92E-03 | 24.62   | 11.52 | 3.26E-02 | 50.95   | 80.91  | 5.29E-01 | 25.64  | 55.45 | 6.44E-01 | 44.71  | 24.37 | 6.66E-02 |
| cg00843019 | -15.65 | 5.57  | 4.93E-03 | -37.16  | 16.68 | 2.59E-02 | -30.27  | 27.11  | 2.64E-01 | -12.99 | 6.50  | 4.55E-02 | -6.19  | 16.63 | 7.10E-01 |



|            |        |       |          |        |       |          |         |        |          |        |       |          |         |       |          |
|------------|--------|-------|----------|--------|-------|----------|---------|--------|----------|--------|-------|----------|---------|-------|----------|
| cg08309809 | 29.24  | 10.40 | 4.93E-03 | 28.22  | 27.44 | 3.04E-01 | 31.45   | 87.77  | 7.20E-01 | 31.11  | 12.16 | 1.05E-02 | 17.83   | 31.35 | 5.69E-01 |
| cg10949706 | 20.25  | 7.20  | 4.93E-03 | 19.21  | 11.43 | 9.29E-02 | 1.29    | 18.30  | 9.44E-01 | 26.81  | 20.18 | 1.84E-01 | 28.06   | 12.71 | 2.72E-02 |
| cg12630522 | -37.33 | 13.28 | 4.95E-03 | -32.94 | 41.52 | 4.28E-01 | -117.45 | 182.69 | 5.20E-01 | -44.24 | 14.82 | 2.83E-03 | 24.67   | 44.49 | 5.79E-01 |
| cg13145289 | 23.70  | 8.44  | 4.96E-03 | 32.08  | 13.88 | 2.08E-02 | 26.50   | 16.05  | 9.88E-02 | 9.94   | 19.64 | 6.13E-01 | 15.89   | 20.45 | 4.37E-01 |
| cg09247392 | -21.83 | 7.77  | 4.96E-03 | -37.20 | 12.27 | 2.42E-03 | -21.73  | 15.02  | 1.48E-01 | -0.99  | 20.33 | 9.61E-01 | -10.35  | 15.59 | 5.07E-01 |
| cg14506751 | -66.68 | 23.73 | 4.96E-03 | -69.66 | 70.38 | 3.22E-01 | -469.67 | 337.03 | 1.63E-01 | -59.41 | 26.80 | 2.66E-02 | -101.49 | 76.25 | 1.83E-01 |
| cg25573386 | -13.14 | 4.68  | 4.96E-03 | -16.05 | 7.82  | 4.02E-02 | -15.95  | 10.50  | 1.29E-01 | -6.40  | 9.30  | 4.91E-01 | -13.68  | 10.68 | 2.00E-01 |
| cg00049892 | -12.64 | 4.50  | 4.96E-03 | -14.41 | 11.08 | 1.94E-01 | -19.68  | 21.47  | 3.59E-01 | -13.03 | 5.52  | 1.81E-02 | -5.79   | 12.73 | 6.49E-01 |
| cg03658294 | 59.39  | 21.14 | 4.97E-03 | 49.12  | 27.11 | 7.00E-02 | 25.68   | 122.94 | 8.35E-01 | 127.96 | 56.20 | 2.28E-02 | 48.24   | 45.00 | 2.84E-01 |
| cg21994576 | 27.17  | 9.67  | 4.97E-03 | 41.58  | 19.41 | 3.22E-02 | -5.93   | 40.54  | 8.84E-01 | 26.09  | 13.12 | 4.67E-02 | 19.83   | 24.84 | 4.25E-01 |
| cg00011350 | 32.95  | 11.73 | 4.97E-03 | 28.28  | 16.98 | 9.58E-02 | 66.35   | 24.54  | 6.84E-03 | 23.77  | 47.94 | 6.20E-01 | 12.22   | 24.24 | 6.14E-01 |
| cg03640151 | 12.48  | 4.44  | 4.97E-03 | 7.35   | 6.48  | 2.57E-01 | 10.81   | 8.53   | 2.05E-01 | 25.30  | 13.15 | 5.43E-02 | 22.18   | 11.69 | 5.78E-02 |
| cg24212047 | -19.00 | 6.77  | 4.99E-03 | -23.13 | 15.62 | 1.39E-01 | -11.82  | 14.16  | 4.04E-01 | -22.05 | 9.84  | 2.50E-02 | -13.84  | 20.31 | 4.96E-01 |
| cg09501469 | 21.21  | 7.55  | 4.99E-03 | 11.90  | 15.07 | 4.30E-01 | 1.02    | 27.53  | 9.71E-01 | 22.31  | 9.88  | 2.39E-02 | 57.60   | 25.40 | 2.33E-02 |
| cg26331991 | 33.93  | 12.08 | 4.99E-03 | 44.65  | 15.64 | 4.31E-03 | 56.49   | 23.31  | 1.54E-02 | 1.84   | 31.67 | 9.54E-01 | 7.86    | 24.46 | 7.48E-01 |
| cg05281796 | 9.86   | 3.51  | 5.00E-03 | 7.23   | 5.59  | 1.96E-01 | 10.73   | 6.00   | 7.38E-02 | 26.58  | 15.24 | 8.11E-02 | 9.15    | 7.66  | 2.33E-01 |
| cg16217297 | 19.79  | 7.05  | 5.00E-03 | 2.09   | 14.95 | 8.89E-01 | 8.32    | 30.48  | 7.85E-01 | 28.85  | 8.87  | 1.14E-03 | 6.98    | 23.29 | 7.64E-01 |
| cg27263151 | -14.71 | 5.24  | 5.00E-03 | -21.46 | 13.84 | 1.21E-01 | -35.09  | 28.38  | 2.16E-01 | -13.28 | 6.18  | 3.15E-02 | -8.54   | 16.37 | 6.02E-01 |
| cg21447620 | 24.52  | 8.74  | 5.00E-03 | 25.30  | 14.87 | 8.89E-02 | 14.91   | 16.50  | 3.66E-01 | 15.02  | 16.38 | 3.59E-01 | 61.67   | 23.77 | 9.48E-03 |
| cg17469039 | 22.19  | 7.91  | 5.01E-03 | 9.52   | 15.49 | 5.39E-01 | 22.90   | 15.95  | 1.51E-01 | 28.82  | 12.96 | 2.62E-02 | 27.62   | 22.69 | 2.23E-01 |
| cg23184070 | 16.84  | 6.00  | 5.01E-03 | 16.73  | 8.43  | 4.72E-02 | 8.55    | 15.92  | 5.91E-01 | 17.14  | 20.55 | 4.04E-01 | 21.35   | 11.62 | 6.61E-02 |
| cg25101396 | 11.29  | 4.02  | 5.01E-03 | 10.15  | 5.23  | 5.22E-02 | 18.31   | 9.02   | 4.25E-02 | 13.65  | 19.03 | 4.73E-01 | 6.27    | 9.94  | 5.28E-01 |
| cg24482314 | -14.29 | 5.09  | 5.01E-03 | -29.58 | 13.90 | 3.33E-02 | 5.43    | 29.10  | 8.52E-01 | -10.43 | 5.94  | 7.93E-02 | -27.86  | 15.97 | 8.10E-02 |
| cg09295573 | 11.28  | 4.02  | 5.02E-03 | 11.32  | 4.36  | 9.42E-03 | 6.33    | 25.14  | 8.01E-01 | 23.20  | 13.39 | 8.33E-02 | -16.56  | 21.34 | 4.38E-01 |
| cg01663469 | 29.07  | 10.36 | 5.02E-03 | 29.64  | 15.32 | 5.30E-02 | 3.58    | 29.03  | 9.02E-01 | 47.54  | 29.64 | 1.09E-01 | 31.55   | 19.13 | 9.90E-02 |
| cg08249608 | 36.29  | 12.93 | 5.02E-03 | 29.51  | 16.59 | 7.53E-02 | 88.33   | 40.59  | 2.95E-02 | 29.87  | 45.36 | 5.10E-01 | 33.20   | 28.24 | 2.40E-01 |
| cg19416088 | 43.03  | 15.34 | 5.02E-03 | 46.63  | 35.88 | 1.94E-01 | 47.67   | 188.95 | 8.01E-01 | 45.46  | 18.44 | 1.37E-02 | 23.11   | 44.41 | 6.03E-01 |
| cg01693650 | 41.88  | 14.93 | 5.03E-03 | 51.19  | 20.85 | 1.41E-02 | 5.43    | 51.28  | 9.16E-01 | 43.92  | 46.08 | 3.41E-01 | 35.50   | 27.38 | 1.95E-01 |
| cg06880365 | 22.09  | 7.87  | 5.03E-03 | 18.97  | 10.79 | 7.87E-02 | -7.89   | 27.05  | 7.71E-01 | 27.46  | 15.47 | 7.59E-02 | 44.78   | 22.39 | 4.55E-02 |
| cg04208237 | -45.05 | 16.06 | 5.04E-03 | -62.03 | 24.55 | 1.15E-02 | -10.30  | 39.92  | 7.96E-01 | -34.34 | 40.62 | 3.98E-01 | -45.19  | 31.89 | 1.56E-01 |
| cg09355820 | -20.61 | 7.35  | 5.04E-03 | -26.60 | 11.62 | 2.21E-02 | -19.21  | 37.28  | 6.06E-01 | -13.01 | 11.23 | 2.47E-01 | -27.48  | 20.16 | 1.73E-01 |
| cg02602413 | -19.21 | 6.85  | 5.04E-03 | -22.90 | 11.20 | 4.08E-02 | -10.34  | 15.09  | 4.93E-01 | -28.09 | 15.19 | 6.44E-02 | -12.93  | 14.72 | 3.80E-01 |
| cg17749468 | -55.32 | 19.72 | 5.04E-03 | -90.36 | 59.28 | 1.27E-01 | -315.94 | 265.98 | 2.35E-01 | -45.82 | 21.67 | 3.45E-02 | -101.63 | 83.85 | 2.26E-01 |
| cg12729822 | 10.06  | 3.59  | 5.04E-03 | 10.83  | 4.86  | 2.56E-02 | 8.38    | 8.03   | 2.97E-01 | 9.31   | 8.99  | 3.00E-01 | 10.38   | 11.58 | 3.70E-01 |
| cg05012825 | 31.96  | 11.39 | 5.04E-03 | 26.32  | 41.76 | 5.29E-01 | -83.73  | 164.21 | 6.10E-01 | 34.33  | 12.59 | 6.39E-03 | 22.41   | 35.80 | 5.31E-01 |

|            |        |       |          |        |       |          |         |        |          |        |       |          |        |       |          |
|------------|--------|-------|----------|--------|-------|----------|---------|--------|----------|--------|-------|----------|--------|-------|----------|
| cg24636477 | 22.12  | 7.89  | 5.04E-03 | 31.03  | 25.13 | 2.17E-01 | 20.20   | 40.89  | 6.21E-01 | 29.80  | 9.51  | 1.72E-03 | -2.31  | 16.14 | 8.86E-01 |
| cg03970086 | 21.68  | 7.73  | 5.05E-03 | 27.41  | 15.93 | 8.53E-02 | 24.75   | 15.80  | 1.17E-01 | 19.07  | 11.78 | 1.05E-01 | 11.45  | 25.19 | 6.50E-01 |
| cg04538990 | -11.79 | 4.21  | 5.05E-03 | -18.10 | 8.37  | 3.05E-02 | -4.68   | 13.83  | 7.35E-01 | -10.56 | 5.74  | 6.58E-02 | -9.48  | 12.26 | 4.39E-01 |
| cg00755836 | 41.20  | 14.70 | 5.05E-03 | 43.48  | 18.43 | 1.84E-02 | 41.12   | 94.38  | 6.63E-01 | 88.34  | 62.93 | 1.60E-01 | 27.15  | 27.50 | 3.23E-01 |
| cg20059682 | -19.36 | 6.90  | 5.05E-03 | -22.99 | 12.51 | 6.60E-02 | 12.53   | 27.33  | 6.47E-01 | -23.75 | 9.69  | 1.42E-02 | -8.81  | 19.61 | 6.53E-01 |
| cg00560747 | -13.01 | 4.64  | 5.06E-03 | -15.94 | 6.28  | 1.11E-02 | -4.18   | 12.31  | 7.34E-01 | -14.21 | 14.50 | 3.27E-01 | -10.75 | 10.15 | 2.90E-01 |
| cg07135303 | 22.67  | 8.08  | 5.06E-03 | 24.90  | 12.63 | 4.87E-02 | 23.40   | 15.34  | 1.27E-01 | 15.90  | 21.57 | 4.61E-01 | 21.69  | 19.50 | 2.66E-01 |
| cg01024455 | 19.58  | 6.98  | 5.06E-03 | 20.56  | 10.57 | 5.17E-02 | 17.68   | 19.07  | 3.54E-01 | 24.16  | 16.89 | 1.53E-01 | 15.87  | 13.74 | 2.48E-01 |
| cg22316093 | 6.37   | 2.27  | 5.06E-03 | 7.55   | 3.21  | 1.88E-02 | 1.36    | 4.87   | 7.79E-01 | 8.77   | 8.81  | 3.20E-01 | 7.98   | 4.92  | 1.04E-01 |
| cg00578039 | 11.95  | 4.26  | 5.07E-03 | 10.00  | 5.46  | 6.69E-02 | 21.17   | 11.38  | 6.28E-02 | 24.80  | 12.73 | 5.14E-02 | 0.67   | 11.52 | 9.54E-01 |
| cg04012896 | 34.04  | 12.15 | 5.07E-03 | 16.63  | 19.87 | 4.03E-01 | 48.65   | 36.51  | 1.83E-01 | 25.11  | 9.89  | 1.11E-02 | 80.54  | 27.07 | 2.93E-03 |
| cg21225501 | -60.00 | 21.41 | 5.07E-03 | -51.98 | 32.83 | 1.13E-01 | 161.24  | 141.97 | 2.56E-01 | -88.71 | 49.72 | 7.44E-02 | -68.51 | 35.37 | 5.27E-02 |
| cg21671806 | 20.37  | 7.27  | 5.08E-03 | 21.68  | 13.85 | 1.17E-01 | 28.73   | 18.64  | 1.23E-01 | 21.20  | 11.49 | 6.49E-02 | 8.93   | 17.54 | 6.11E-01 |
| cg08977791 | 28.54  | 10.19 | 5.08E-03 | 13.69  | 25.98 | 5.98E-01 | 26.12   | 53.93  | 6.28E-01 | 27.75  | 11.89 | 1.95E-02 | 67.35  | 36.94 | 6.83E-02 |
| cg21127735 | -17.93 | 6.40  | 5.08E-03 | -15.52 | 8.60  | 7.12E-02 | -27.12  | 17.27  | 1.16E-01 | -23.38 | 25.70 | 3.63E-01 | -16.86 | 12.87 | 1.90E-01 |
| cg02873098 | 8.71   | 3.11  | 5.08E-03 | 6.09   | 4.24  | 1.51E-01 | 17.96   | 7.13   | 1.18E-02 | 12.62  | 7.46  | 9.09E-02 | 1.82   | 7.79  | 8.15E-01 |
| cg23697467 | 27.58  | 9.85  | 5.09E-03 | 34.98  | 20.70 | 9.11E-02 | 31.46   | 21.76  | 1.48E-01 | 27.22  | 14.37 | 5.82E-02 | 4.48   | 31.25 | 8.86E-01 |
| cg17679470 | -16.00 | 5.71  | 5.09E-03 | -20.42 | 10.67 | 5.58E-02 | -16.63  | 12.34  | 1.78E-01 | -14.80 | 10.85 | 1.73E-01 | -11.20 | 12.12 | 3.55E-01 |
| cg05961802 | 36.08  | 12.88 | 5.10E-03 | 43.34  | 25.26 | 8.63E-02 | 13.41   | 57.09  | 8.14E-01 | 26.42  | 17.13 | 1.23E-01 | 74.33  | 36.63 | 4.25E-02 |
| cg03654841 | -9.05  | 3.23  | 5.10E-03 | -8.82  | 5.93  | 1.37E-01 | -15.62  | 10.97  | 1.54E-01 | -8.12  | 4.53  | 7.31E-02 | -8.76  | 9.84  | 3.74E-01 |
| cg11391618 | -16.26 | 5.81  | 5.11E-03 | -30.86 | 12.19 | 1.14E-02 | -1.22   | 32.00  | 9.70E-01 | -16.26 | 7.75  | 3.60E-02 | -0.56  | 13.71 | 9.67E-01 |
| cg20666967 | -40.88 | 14.60 | 5.11E-03 | -31.43 | 20.97 | 1.34E-01 | -7.74   | 47.55  | 8.71E-01 | -28.92 | 44.27 | 5.14E-01 | -69.74 | 26.14 | 7.62E-03 |
| cg21007852 | 13.38  | 4.78  | 5.11E-03 | 14.10  | 6.47  | 2.93E-02 | 13.81   | 12.09  | 2.53E-01 | 18.46  | 14.25 | 1.95E-01 | 7.84   | 11.09 | 4.80E-01 |
| cg12316887 | -14.54 | 5.19  | 5.11E-03 | -24.48 | 11.12 | 2.76E-02 | -33.83  | 19.15  | 7.73E-02 | -7.87  | 5.67  | 1.65E-01 | -20.03 | 14.18 | 1.58E-01 |
| cg16281600 | -12.20 | 4.36  | 5.12E-03 | -12.53 | 6.93  | 7.06E-02 | -16.40  | 10.42  | 1.15E-01 | -12.16 | 10.00 | 2.24E-01 | -8.62  | 8.91  | 3.33E-01 |
| cg26966246 | 30.52  | 10.90 | 5.12E-03 | 67.88  | 39.49 | 8.56E-02 | -107.21 | 141.51 | 4.49E-01 | 29.08  | 11.71 | 1.30E-02 | 15.17  | 48.30 | 7.54E-01 |
| cg03502812 | 15.03  | 5.37  | 5.13E-03 | 6.00   | 9.27  | 5.17E-01 | 19.74   | 9.97   | 4.77E-02 | 15.49  | 12.98 | 2.33E-01 | 22.76  | 11.89 | 5.55E-02 |
| cg09814128 | -32.76 | 11.70 | 5.13E-03 | -30.33 | 25.69 | 2.38E-01 | -85.61  | 49.15  | 8.15E-02 | -34.95 | 14.97 | 1.96E-02 | -1.99  | 33.15 | 9.52E-01 |
| cg18786593 | 15.11  | 5.40  | 5.14E-03 | 3.25   | 12.04 | 7.87E-01 | 47.33   | 29.48  | 1.08E-01 | 14.17  | 6.54  | 3.03E-02 | 28.72  | 14.54 | 4.83E-02 |
| cg22169206 | 27.84  | 9.95  | 5.14E-03 | 34.20  | 12.16 | 4.90E-03 | -22.83  | 39.27  | 5.61E-01 | 19.73  | 43.13 | 6.47E-01 | 25.14  | 21.60 | 2.44E-01 |
| cg16494108 | 10.30  | 3.68  | 5.15E-03 | 5.10   | 6.37  | 4.23E-01 | 14.22   | 8.05   | 7.75E-02 | 13.17  | 6.47  | 4.18E-02 | 10.17  | 10.06 | 3.12E-01 |
| cg22758189 | 23.96  | 8.57  | 5.15E-03 | 19.93  | 17.42 | 2.52E-01 | 2.63    | 20.48  | 8.98E-01 | 36.24  | 12.58 | 3.95E-03 | 15.64  | 24.80 | 5.28E-01 |
| cg20272619 | 32.43  | 11.59 | 5.16E-03 | 38.89  | 16.41 | 1.78E-02 | 6.78    | 34.74  | 8.45E-01 | 41.37  | 37.93 | 2.75E-01 | 28.36  | 21.31 | 1.83E-01 |
| cg23878264 | -6.57  | 2.35  | 5.16E-03 | -7.12  | 4.46  | 1.10E-01 | -7.81   | 6.76   | 2.48E-01 | -8.11  | 3.51  | 2.09E-02 | -0.10  | 6.00  | 9.86E-01 |
| cg05605980 | 16.66  | 5.96  | 5.16E-03 | 18.09  | 12.36 | 1.43E-01 | 4.15    | 21.36  | 8.46E-01 | 18.35  | 7.68  | 1.69E-02 | 12.41  | 19.93 | 5.34E-01 |

|            |        |       |          |        |       |          |         |        |          |        |       |          |        |       |          |
|------------|--------|-------|----------|--------|-------|----------|---------|--------|----------|--------|-------|----------|--------|-------|----------|
| cg08099797 | -10.06 | 3.60  | 5.16E-03 | -9.46  | 5.12  | 6.48E-02 | -6.69   | 8.42   | 4.27E-01 | -12.42 | 9.91  | 2.10E-01 | -13.17 | 8.19  | 1.08E-01 |
| cg19500851 | 27.93  | 9.99  | 5.16E-03 | 22.76  | 17.80 | 2.01E-01 | 28.35   | 20.12  | 1.59E-01 | 20.22  | 18.59 | 2.77E-01 | 52.94  | 25.79 | 4.01E-02 |
| cg16374656 | 6.84   | 2.45  | 5.17E-03 | 6.42   | 3.52  | 6.83E-02 | 8.09    | 6.88   | 2.40E-01 | 11.19  | 4.84  | 2.06E-02 | -1.02  | 6.62  | 8.77E-01 |
| cg08379897 | 19.65  | 7.03  | 5.17E-03 | 20.51  | 10.35 | 4.76E-02 | 50.02   | 19.27  | 9.45E-03 | 10.42  | 19.86 | 6.00E-01 | 11.28  | 10.73 | 2.93E-01 |
| cg24930634 | 46.53  | 16.64 | 5.17E-03 | 98.93  | 58.91 | 9.31E-02 | -114.05 | 250.12 | 6.48E-01 | 43.19  | 18.00 | 1.64E-02 | 36.50  | 67.17 | 5.87E-01 |
| cg04699199 | -14.75 | 5.28  | 5.18E-03 | -18.07 | 11.75 | 1.24E-01 | -4.29   | 12.94  | 7.41E-01 | -12.96 | 7.56  | 8.67E-02 | -28.04 | 13.81 | 4.23E-02 |
| cg13671109 | 23.58  | 8.43  | 5.18E-03 | 13.57  | 29.50 | 6.46E-01 | -61.17  | 136.29 | 6.54E-01 | 26.41  | 9.06  | 3.56E-03 | -3.70  | 38.46 | 9.23E-01 |
| cg21548155 | 18.83  | 6.74  | 5.19E-03 | 30.03  | 12.73 | 1.83E-02 | 17.40   | 15.92  | 2.74E-01 | 12.40  | 12.32 | 3.14E-01 | 14.85  | 13.69 | 2.78E-01 |
| cg19664013 | 8.48   | 3.03  | 5.19E-03 | 8.46   | 4.08  | 3.82E-02 | 6.18    | 7.27   | 3.95E-01 | 16.02  | 10.60 | 1.31E-01 | 7.40   | 6.93  | 2.86E-01 |
| cg08423507 | -52.79 | 18.89 | 5.20E-03 | -55.03 | 23.03 | 1.69E-02 | 86.83   | 80.01  | 2.78E-01 | -64.95 | 44.82 | 1.47E-01 | -69.01 | 33.58 | 3.99E-02 |
| cg03755955 | 20.73  | 7.42  | 5.20E-03 | 17.48  | 17.71 | 3.24E-01 | 31.04   | 17.91  | 8.31E-02 | 17.44  | 10.03 | 8.19E-02 | 26.36  | 22.80 | 2.48E-01 |
| cg23055159 | 33.43  | 11.96 | 5.21E-03 | 20.25  | 18.55 | 2.75E-01 | -40.49  | 72.79  | 5.78E-01 | 53.97  | 17.89 | 2.55E-03 | 19.52  | 34.55 | 5.72E-01 |
| cg18762422 | -14.85 | 5.32  | 5.22E-03 | -21.63 | 5.92  | 2.57E-04 | -2.02   | 23.34  | 9.31E-01 | -3.15  | 8.58  | 7.14E-01 | -19.88 | 13.49 | 1.41E-01 |
| cg05229965 | 29.51  | 10.57 | 5.23E-03 | 26.99  | 13.27 | 4.21E-02 | 4.04    | 40.18  | 9.20E-01 | 80.15  | 39.75 | 4.37E-02 | 28.52  | 22.19 | 1.99E-01 |
| cg05446010 | -56.92 | 20.38 | 5.23E-03 | -68.85 | 67.48 | 3.08E-01 | -497.29 | 303.80 | 1.02E-01 | -56.09 | 22.37 | 1.22E-02 | -24.82 | 74.82 | 7.40E-01 |
| cg05663418 | -40.95 | 14.67 | 5.24E-03 | -70.64 | 36.34 | 5.19E-02 | -191.19 | 187.90 | 3.09E-01 | -33.63 | 17.14 | 4.97E-02 | -36.97 | 46.70 | 4.28E-01 |
| cg20686446 | -45.32 | 16.23 | 5.24E-03 | -44.03 | 21.54 | 4.09E-02 | -2.52   | 68.19  | 9.71E-01 | -47.01 | 49.95 | 3.47E-01 | -56.38 | 31.26 | 7.13E-02 |
| cg02552255 | 13.59  | 4.87  | 5.24E-03 | 14.42  | 6.89  | 3.63E-02 | 23.29   | 10.83  | 3.14E-02 | 4.04   | 15.92 | 7.99E-01 | 6.35   | 10.73 | 5.54E-01 |
| cg02774439 | 31.72  | 11.36 | 5.24E-03 | 34.21  | 16.66 | 4.00E-02 | 42.08   | 31.85  | 1.86E-01 | 37.92  | 29.27 | 1.95E-01 | 18.45  | 22.40 | 4.10E-01 |
| cg25620760 | -7.34  | 2.63  | 5.24E-03 | -8.31  | 4.19  | 4.74E-02 | -12.73  | 5.95   | 3.24E-02 | -6.33  | 5.15  | 2.19E-01 | 0.46   | 6.80  | 9.46E-01 |
| cg08997628 | 33.87  | 12.13 | 5.24E-03 | 29.64  | 35.34 | 4.02E-01 | 110.42  | 98.21  | 2.61E-01 | 36.29  | 13.76 | 8.33E-03 | 5.15   | 40.73 | 8.99E-01 |
| cg11328253 | 17.33  | 6.21  | 5.24E-03 | 18.84  | 10.49 | 7.25E-02 | 11.53   | 11.78  | 3.28E-01 | 23.07  | 16.53 | 1.63E-01 | 18.49  | 12.91 | 1.52E-01 |
| cg03290730 | -30.43 | 10.90 | 5.25E-03 | -36.25 | 21.98 | 9.91E-02 | 21.33   | 50.08  | 6.70E-01 | -31.33 | 14.04 | 2.56E-02 | -35.01 | 33.85 | 3.01E-01 |
| cg19979738 | -21.54 | 7.72  | 5.25E-03 | -22.29 | 10.01 | 2.59E-02 | -0.35   | 37.74  | 9.93E-01 | -10.99 | 21.34 | 6.07E-01 | -29.32 | 15.98 | 6.66E-02 |
| cg01734786 | 29.70  | 10.64 | 5.26E-03 | 26.96  | 14.73 | 6.73E-02 | 39.84   | 30.67  | 1.94E-01 | 43.28  | 34.37 | 2.08E-01 | 25.52  | 20.79 | 2.20E-01 |
| cg20064897 | 10.33  | 3.70  | 5.26E-03 | 14.21  | 9.07  | 1.17E-01 | 21.48   | 13.42  | 1.09E-01 | 6.84   | 4.48  | 1.27E-01 | 22.41  | 13.62 | 1.00E-01 |
| cg10982851 | -24.99 | 8.95  | 5.26E-03 | -27.75 | 16.55 | 9.36E-02 | -36.87  | 47.80  | 4.40E-01 | -30.05 | 12.03 | 1.25E-02 | 9.13   | 26.05 | 7.26E-01 |
| cg20835725 | 49.07  | 17.58 | 5.26E-03 | -15.76 | 53.32 | 7.68E-01 | 220.68  | 211.80 | 2.97E-01 | 54.43  | 19.65 | 5.61E-03 | 67.86  | 60.79 | 2.64E-01 |
| cg01583034 | 40.27  | 14.43 | 5.26E-03 | 59.53  | 39.47 | 1.32E-01 | 162.41  | 230.76 | 4.82E-01 | 42.10  | 16.39 | 1.02E-02 | -11.25 | 48.99 | 8.18E-01 |
| cg01348293 | 15.13  | 5.42  | 5.27E-03 | 8.78   | 8.00  | 2.73E-01 | 22.03   | 11.07  | 4.66E-02 | 19.65  | 21.99 | 3.71E-01 | 19.24  | 11.06 | 8.20E-02 |
| cg02703198 | 52.63  | 18.86 | 5.27E-03 | 85.58  | 50.58 | 9.06E-02 | -211.44 | 218.26 | 3.33E-01 | 45.99  | 21.28 | 3.07E-02 | 90.90  | 72.31 | 2.09E-01 |
| cg27298170 | -18.69 | 6.70  | 5.27E-03 | -15.14 | 18.84 | 4.21E-01 | -27.96  | 35.24  | 4.27E-01 | -18.19 | 7.63  | 1.71E-02 | -26.41 | 26.13 | 3.12E-01 |
| cg22153345 | 68.62  | 24.60 | 5.28E-03 | 96.81  | 35.99 | 7.15E-03 | 131.72  | 124.93 | 2.92E-01 | 43.91  | 58.42 | 4.52E-01 | 33.17  | 43.69 | 4.48E-01 |
| cg05141578 | 18.95  | 6.80  | 5.28E-03 | 22.34  | 10.68 | 3.64E-02 | 16.29   | 14.48  | 2.61E-01 | 15.09  | 14.74 | 3.06E-01 | 19.19  | 16.87 | 2.55E-01 |
| cg18195384 | 41.00  | 14.70 | 5.29E-03 | 47.79  | 17.36 | 5.91E-03 | 9.77    | 77.67  | 9.00E-01 | 56.31  | 79.51 | 4.79E-01 | 20.92  | 31.87 | 5.11E-01 |

|            |        |       |          |        |       |          |        |        |          |         |       |          |        |       |          |
|------------|--------|-------|----------|--------|-------|----------|--------|--------|----------|---------|-------|----------|--------|-------|----------|
| cg01981048 | -9.39  | 3.37  | 5.29E-03 | -9.24  | 5.02  | 6.56E-02 | -13.15 | 6.96   | 5.87E-02 | -4.93   | 10.58 | 6.41E-01 | -7.70  | 7.27  | 2.90E-01 |
| cg17339927 | 16.74  | 6.00  | 5.29E-03 | 12.57  | 8.65  | 1.46E-01 | 23.99  | 12.83  | 6.16E-02 | 19.03   | 20.19 | 3.46E-01 | 17.79  | 13.07 | 1.73E-01 |
| cg11803184 | 21.32  | 7.65  | 5.31E-03 | 20.91  | 18.90 | 2.69E-01 | 30.18  | 21.55  | 1.61E-01 | 16.62   | 9.61  | 8.38E-02 | 46.66  | 27.67 | 9.17E-02 |
| cg14560703 | -7.81  | 2.80  | 5.31E-03 | -6.30  | 4.40  | 1.52E-01 | -8.84  | 5.89   | 1.34E-01 | -9.05   | 5.92  | 1.26E-01 | -8.50  | 7.36  | 2.48E-01 |
| cg19418458 | 3.29   | 1.18  | 5.31E-03 | 2.05   | 1.68  | 2.22E-01 | 4.20   | 2.62   | 1.08E-01 | 2.70    | 4.02  | 5.03E-01 | 5.45   | 2.52  | 3.05E-02 |
| cg01191660 | -11.44 | 4.10  | 5.32E-03 | -14.97 | 7.92  | 5.86E-02 | -33.08 | 16.27  | 4.20E-02 | -6.62   | 5.12  | 1.96E-01 | -18.11 | 13.99 | 1.95E-01 |
| cg22075362 | -15.14 | 5.43  | 5.32E-03 | -22.76 | 8.51  | 7.48E-03 | -10.56 | 11.24  | 3.47E-01 | -11.04  | 12.63 | 3.82E-01 | -7.79  | 13.02 | 5.49E-01 |
| cg26145873 | -11.06 | 3.97  | 5.32E-03 | -12.57 | 8.63  | 1.45E-01 | -19.66 | 12.53  | 1.17E-01 | -9.31   | 5.23  | 7.50E-02 | -9.46  | 11.80 | 4.23E-01 |
| cg04838847 | -21.86 | 7.85  | 5.33E-03 | -23.16 | 9.67  | 1.66E-02 | -5.52  | 34.70  | 8.74E-01 | -39.11  | 21.79 | 7.26E-02 | -7.82  | 19.59 | 6.90E-01 |
| cg22773522 | -10.03 | 3.60  | 5.33E-03 | -19.21 | 9.66  | 4.69E-02 | -9.52  | 16.11  | 5.55E-01 | -10.38  | 4.22  | 1.39E-02 | 7.99   | 12.49 | 5.22E-01 |
| cg24531009 | -21.59 | 7.75  | 5.33E-03 | -29.87 | 13.73 | 2.97E-02 | -23.20 | 15.68  | 1.39E-01 | -21.70  | 16.81 | 1.97E-01 | -8.03  | 16.35 | 6.23E-01 |
| cg10141261 | -9.69  | 3.48  | 5.33E-03 | -11.91 | 6.47  | 6.58E-02 | -18.32 | 11.84  | 1.22E-01 | -8.05   | 4.89  | 1.00E-01 | -5.08  | 10.01 | 6.12E-01 |
| cg03002735 | -16.16 | 5.80  | 5.35E-03 | -17.46 | 8.57  | 4.16E-02 | -12.85 | 13.54  | 3.43E-01 | -16.35  | 14.43 | 2.57E-01 | -16.06 | 13.09 | 2.20E-01 |
| cg01571283 | -22.08 | 7.93  | 5.35E-03 | -13.33 | 19.47 | 4.93E-01 | -24.92 | 45.90  | 5.87E-01 | -21.87  | 9.31  | 1.89E-02 | -41.28 | 28.12 | 1.42E-01 |
| cg04278905 | 21.14  | 7.59  | 5.35E-03 | 23.13  | 12.11 | 5.61E-02 | 21.69  | 15.39  | 1.59E-01 | 20.12   | 15.35 | 1.90E-01 | 15.54  | 21.99 | 4.80E-01 |
| cg07220782 | 15.06  | 5.41  | 5.36E-03 | 10.73  | 11.41 | 3.47E-01 | 20.82  | 12.51  | 9.59E-02 | 13.83   | 10.40 | 1.83E-01 | 15.76  | 9.59  | 1.00E-01 |
| cg01550716 | 43.97  | 15.79 | 5.36E-03 | 52.77  | 22.72 | 2.02E-02 | 2.88   | 61.87  | 9.63E-01 | 45.57   | 42.10 | 2.79E-01 | 38.19  | 28.30 | 1.77E-01 |
| cg20738733 | 21.54  | 7.74  | 5.37E-03 | 21.73  | 20.77 | 2.95E-01 | 21.56  | 21.75  | 3.21E-01 | 21.47   | 9.58  | 2.50E-02 | 21.73  | 26.97 | 4.21E-01 |
| cg03899643 | -13.23 | 4.75  | 5.38E-03 | -17.17 | 7.24  | 1.77E-02 | -18.47 | 11.19  | 9.89E-02 | 1.00    | 11.20 | 9.29E-01 | -12.85 | 10.40 | 2.17E-01 |
| cg01729401 | 18.41  | 6.61  | 5.38E-03 | 25.56  | 12.24 | 3.68E-02 | -8.11  | 22.07  | 7.13E-01 | 21.64   | 9.40  | 2.14E-02 | 7.85   | 18.84 | 6.77E-01 |
| cg27311041 | 16.50  | 5.93  | 5.38E-03 | 16.57  | 15.39 | 2.82E-01 | 30.69  | 26.66  | 2.50E-01 | 15.88   | 6.84  | 2.02E-02 | 11.67  | 26.24 | 6.57E-01 |
| cg02696169 | 15.56  | 5.59  | 5.38E-03 | 13.28  | 6.37  | 3.71E-02 | 14.99  | 7.84   | 5.60E-02 | 38.74   | 12.49 | 1.92E-03 | 3.95   | 9.57  | 6.80E-01 |
| cg03007522 | 18.79  | 6.75  | 5.38E-03 | 44.45  | 21.35 | 3.74E-02 | 13.21  | 32.73  | 6.86E-01 | 19.69   | 8.26  | 1.72E-02 | 3.37   | 15.49 | 8.28E-01 |
| cg23274923 | 23.94  | 8.60  | 5.39E-03 | 45.87  | 20.80 | 2.74E-02 | 18.53  | 22.33  | 4.07E-01 | 18.48   | 11.35 | 1.03E-01 | 25.73  | 26.49 | 3.32E-01 |
| cg25970266 | 42.61  | 15.31 | 5.39E-03 | 33.39  | 42.77 | 4.35E-01 | 0.61   | 192.95 | 9.97E-01 | 40.26   | 17.08 | 1.84E-02 | 96.94  | 61.81 | 1.17E-01 |
| cg18676237 | -47.98 | 17.24 | 5.40E-03 | -42.69 | 20.17 | 3.43E-02 | 58.07  | 99.52  | 5.60E-01 | -129.31 | 79.90 | 1.06E-01 | -64.94 | 39.32 | 9.87E-02 |
| cg15724773 | 32.08  | 11.53 | 5.40E-03 | 26.65  | 33.11 | 4.21E-01 | 60.95  | 238.27 | 7.98E-01 | 27.78   | 12.67 | 2.83E-02 | 119.13 | 52.80 | 2.41E-02 |
| cg26540302 | -22.15 | 7.96  | 5.40E-03 | -13.61 | 21.45 | 5.26E-01 | -69.03 | 42.50  | 1.04E-01 | -24.44  | 9.15  | 7.59E-03 | 9.08   | 30.02 | 7.62E-01 |
| cg01907761 | -11.49 | 4.13  | 5.41E-03 | -22.13 | 7.80  | 4.57E-03 | -0.54  | 9.68   | 9.55E-01 | -9.15   | 5.86  | 1.18E-01 | -12.45 | 9.99  | 2.13E-01 |
| cg06266861 | -24.14 | 8.68  | 5.41E-03 | -22.02 | 19.12 | 2.49E-01 | -88.27 | 50.20  | 7.86E-02 | -23.34  | 10.43 | 2.53E-02 | -11.27 | 32.38 | 7.28E-01 |
| cg01783362 | 31.89  | 11.47 | 5.41E-03 | 8.12   | 40.66 | 8.42E-01 | -41.01 | 139.59 | 7.69E-01 | 37.11   | 12.37 | 2.69E-03 | -7.10  | 49.35 | 8.86E-01 |
| cg21538834 | 16.88  | 6.07  | 5.42E-03 | 10.47  | 9.07  | 2.48E-01 | 28.86  | 11.44  | 1.16E-02 | 19.64   | 19.42 | 3.12E-01 | 12.37  | 14.57 | 3.96E-01 |
| cg05098381 | 15.71  | 5.65  | 5.42E-03 | 23.46  | 9.89  | 1.77E-02 | 19.54  | 13.14  | 1.37E-01 | 12.01   | 9.16  | 1.90E-01 | -1.18  | 17.16 | 9.45E-01 |
| cg06633013 | -22.16 | 7.97  | 5.43E-03 | -20.52 | 9.91  | 3.83E-02 | 2.16   | 29.34  | 9.41E-01 | -32.74  | 27.99 | 2.42E-01 | -32.25 | 17.91 | 7.18E-02 |
| cg26683252 | -16.65 | 5.99  | 5.43E-03 | -20.52 | 8.96  | 2.21E-02 | 3.95   | 19.58  | 8.40E-01 | -26.76  | 16.75 | 1.10E-01 | -13.37 | 10.40 | 1.98E-01 |

|            |        |       |          |        |       |          |         |        |          |        |       |          |        |       |          |
|------------|--------|-------|----------|--------|-------|----------|---------|--------|----------|--------|-------|----------|--------|-------|----------|
| cg06488678 | -13.82 | 4.97  | 5.44E-03 | -21.45 | 13.70 | 1.17E-01 | -29.93  | 28.26  | 2.89E-01 | -11.51 | 5.73  | 4.47E-02 | -16.50 | 16.97 | 3.31E-01 |
| cg27132732 | -12.56 | 4.52  | 5.44E-03 | -19.75 | 8.06  | 1.42E-02 | -8.23   | 11.05  | 4.56E-01 | -6.84  | 7.68  | 3.73E-01 | -15.15 | 10.90 | 1.65E-01 |
| cg08118354 | -13.41 | 4.82  | 5.44E-03 | -15.85 | 7.31  | 3.02E-02 | -10.63  | 11.31  | 3.47E-01 | -11.00 | 13.80 | 4.25E-01 | -12.39 | 9.44  | 1.89E-01 |
| cg06411987 | -19.31 | 6.95  | 5.45E-03 | -21.60 | 17.82 | 2.26E-01 | 37.46   | 38.06  | 3.25E-01 | -22.61 | 8.11  | 5.32E-03 | -8.55  | 24.40 | 7.26E-01 |
| cg13511885 | 11.72  | 4.22  | 5.45E-03 | 8.96   | 5.95  | 1.32E-01 | 22.25   | 10.44  | 3.30E-02 | 5.40   | 10.00 | 5.89E-01 | 16.83  | 10.69 | 1.16E-01 |
| cg24623244 | 32.43  | 11.67 | 5.45E-03 | 39.33  | 15.90 | 1.34E-02 | 14.62   | 27.72  | 5.98E-01 | 6.00   | 45.02 | 8.94E-01 | 38.05  | 25.05 | 1.29E-01 |
| cg01550799 | -14.84 | 5.34  | 5.46E-03 | -27.20 | 13.12 | 3.82E-02 | -16.42  | 19.25  | 3.94E-01 | -11.55 | 6.61  | 8.05E-02 | -14.69 | 16.57 | 3.75E-01 |
| cg11715092 | 15.59  | 5.61  | 5.46E-03 | 15.63  | 7.22  | 3.05E-02 | 21.84   | 13.13  | 9.63E-02 | 2.44   | 25.95 | 9.25E-01 | 12.29  | 13.70 | 3.70E-01 |
| cg04657044 | 12.84  | 4.62  | 5.47E-03 | 16.21  | 6.43  | 1.17E-02 | 18.58   | 11.01  | 9.16E-02 | 20.31  | 15.11 | 1.79E-01 | -1.31  | 9.40  | 8.89E-01 |
| cg16312496 | -12.75 | 4.59  | 5.47E-03 | -12.13 | 12.07 | 3.15E-01 | -8.22   | 16.37  | 6.16E-01 | -11.53 | 5.55  | 3.77E-02 | -26.64 | 15.11 | 7.79E-02 |
| cg27021553 | 10.37  | 3.73  | 5.48E-03 | 6.28   | 4.91  | 2.01E-01 | 22.91   | 9.17   | 1.24E-02 | 7.59   | 13.09 | 5.62E-01 | 13.25  | 8.91  | 1.37E-01 |
| cg26551975 | 20.06  | 7.22  | 5.48E-03 | 19.87  | 23.91 | 4.06E-01 | 23.63   | 64.63  | 7.15E-01 | 20.32  | 8.05  | 1.16E-02 | 17.46  | 23.89 | 4.65E-01 |
| cg24722112 | 41.93  | 15.10 | 5.50E-03 | 50.11  | 38.79 | 1.96E-01 | -153.88 | 156.25 | 3.25E-01 | 39.31  | 17.48 | 2.46E-02 | 69.32  | 49.56 | 1.62E-01 |
| cg09618998 | 9.33   | 3.36  | 5.50E-03 | 7.97   | 4.22  | 5.89E-02 | 13.71   | 8.61   | 1.11E-01 | 10.95  | 13.55 | 4.19E-01 | 9.93   | 8.61  | 2.48E-01 |
| cg08783300 | 27.90  | 10.05 | 5.50E-03 | 24.09  | 13.87 | 8.25E-02 | 37.72   | 29.59  | 2.02E-01 | 74.29  | 38.82 | 5.57E-02 | 20.23  | 18.56 | 2.76E-01 |
| cg13992678 | 14.44  | 5.20  | 5.50E-03 | 13.52  | 8.13  | 9.65E-02 | 30.31   | 11.87  | 1.06E-02 | 13.22  | 10.11 | 1.91E-01 | 0.02   | 12.86 | 9.99E-01 |
| cg24625894 | 23.12  | 8.33  | 5.51E-03 | 27.23  | 17.34 | 1.16E-01 | 29.40   | 16.76  | 7.95E-02 | 13.54  | 13.23 | 3.06E-01 | 33.44  | 23.47 | 1.54E-01 |
| cg19899237 | -38.82 | 13.99 | 5.51E-03 | -12.09 | 40.91 | 7.68E-01 | -241.93 | 191.92 | 2.07E-01 | -40.74 | 15.65 | 9.22E-03 | -45.32 | 49.84 | 3.63E-01 |
| cg09743950 | 10.52  | 3.79  | 5.51E-03 | 11.28  | 7.00  | 1.07E-01 | 4.21    | 7.72   | 5.86E-01 | 12.72  | 6.77  | 6.01E-02 | 14.58  | 9.76  | 1.35E-01 |
| cg05370838 | 18.09  | 6.52  | 5.51E-03 | 37.81  | 18.56 | 4.16E-02 | 5.95    | 23.54  | 8.01E-01 | 15.74  | 7.55  | 3.69E-02 | 22.63  | 28.06 | 4.20E-01 |
| cg03939371 | 24.18  | 8.71  | 5.52E-03 | 27.84  | 14.51 | 5.50E-02 | 6.07    | 18.20  | 7.39E-01 | 31.59  | 16.31 | 5.28E-02 | 29.95  | 24.70 | 2.25E-01 |
| cg03783925 | 17.92  | 6.46  | 5.52E-03 | 14.82  | 10.74 | 1.68E-01 | 18.01   | 14.44  | 2.12E-01 | 26.01  | 13.40 | 5.23E-02 | 14.17  | 14.21 | 3.19E-01 |
| cg13759418 | 22.35  | 8.05  | 5.52E-03 | 27.02  | 14.08 | 5.49E-02 | 18.87   | 17.35  | 2.77E-01 | 12.13  | 14.32 | 3.97E-01 | 39.77  | 21.47 | 6.40E-02 |
| cg19678564 | 42.04  | 15.15 | 5.52E-03 | 46.93  | 21.73 | 3.08E-02 | 0.74    | 35.50  | 9.83E-01 | 78.92  | 42.01 | 6.03E-02 | 43.76  | 33.75 | 1.95E-01 |
| cg09302474 | 9.30   | 3.35  | 5.53E-03 | 7.92   | 4.39  | 7.12E-02 | 20.44   | 8.01   | 1.07E-02 | 0.49   | 9.96  | 9.61E-01 | 8.15   | 9.39  | 3.86E-01 |
| cg02491234 | 19.24  | 6.94  | 5.53E-03 | 22.41  | 10.49 | 3.26E-02 | 25.84   | 13.43  | 5.43E-02 | 18.26  | 18.23 | 3.17E-01 | -0.63  | 17.84 | 9.72E-01 |
| cg02722672 | 8.19   | 2.95  | 5.53E-03 | 7.97   | 3.93  | 4.26E-02 | 14.01   | 6.33   | 2.69E-02 | 3.65   | 10.55 | 7.30E-01 | 2.59   | 7.88  | 7.42E-01 |
| cg05089897 | 6.50   | 2.34  | 5.53E-03 | 5.40   | 3.68  | 1.42E-01 | 12.89   | 5.67   | 2.31E-02 | 5.98   | 4.03  | 1.38E-01 | 1.01   | 8.07  | 9.00E-01 |
| cg02133456 | -11.01 | 3.97  | 5.53E-03 | -7.25  | 7.73  | 3.48E-01 | -6.69   | 10.85  | 5.37E-01 | -11.86 | 5.69  | 3.69E-02 | -20.96 | 11.67 | 7.25E-02 |
| cg25653204 | 21.84  | 7.87  | 5.54E-03 | 28.80  | 10.36 | 5.44E-03 | -25.54  | 31.89  | 4.23E-01 | 28.97  | 37.19 | 4.36E-01 | 17.26  | 13.99 | 2.17E-01 |
| cg06377222 | 20.76  | 7.48  | 5.54E-03 | 20.41  | 11.38 | 7.29E-02 | 22.45   | 16.37  | 1.70E-01 | 11.73  | 22.14 | 5.96E-01 | 24.15  | 15.14 | 1.11E-01 |
| cg23121203 | -21.99 | 7.93  | 5.54E-03 | -16.64 | 18.92 | 3.79E-01 | 10.83   | 43.99  | 8.06E-01 | -26.33 | 9.22  | 4.30E-03 | 0.86   | 34.62 | 9.80E-01 |
| cg09731694 | 17.21  | 6.21  | 5.55E-03 | 18.28  | 10.83 | 9.14E-02 | 23.03   | 14.37  | 1.09E-01 | 25.02  | 11.96 | 3.64E-02 | 0.82   | 13.35 | 9.51E-01 |
| cg05589784 | 6.73   | 2.43  | 5.55E-03 | 10.94  | 4.22  | 9.53E-03 | 7.69    | 4.57   | 9.29E-02 | 2.01   | 6.80  | 7.68E-01 | 2.66   | 4.75  | 5.75E-01 |
| cg23818062 | 16.06  | 5.79  | 5.55E-03 | 25.14  | 15.67 | 1.09E-01 | 0.19    | 28.20  | 9.95E-01 | 14.82  | 6.63  | 2.55E-02 | 22.43  | 23.85 | 3.47E-01 |

|            |        |       |          |        |       |          |         |        |          |        |       |          |        |       |          |
|------------|--------|-------|----------|--------|-------|----------|---------|--------|----------|--------|-------|----------|--------|-------|----------|
| cg11579222 | -12.40 | 4.47  | 5.55E-03 | -23.52 | 11.84 | 4.69E-02 | 3.57    | 14.64  | 8.08E-01 | -12.22 | 5.38  | 2.32E-02 | -12.82 | 16.47 | 4.36E-01 |
| cg16742925 | -37.26 | 13.44 | 5.55E-03 | -65.89 | 36.99 | 7.49E-02 | 135.90  | 200.00 | 4.97E-01 | -35.38 | 14.97 | 1.81E-02 | -11.89 | 55.68 | 8.31E-01 |
| cg18892473 | 42.35  | 15.28 | 5.56E-03 | 22.78  | 44.07 | 6.05E-01 | 81.13   | 207.86 | 6.96E-01 | 51.30  | 16.82 | 2.28E-03 | -64.17 | 68.85 | 3.51E-01 |
| cg16327883 | 12.69  | 4.58  | 5.56E-03 | 10.31  | 8.66  | 2.33E-01 | 2.95    | 28.96  | 9.19E-01 | 12.03  | 5.95  | 4.32E-02 | 25.04  | 14.15 | 7.69E-02 |
| cg18316500 | 28.07  | 10.12 | 5.57E-03 | 42.21  | 14.52 | 3.64E-03 | 22.78   | 22.33  | 3.08E-01 | -10.95 | 32.08 | 7.33E-01 | 18.91  | 22.18 | 3.94E-01 |
| cg21794222 | -10.71 | 3.86  | 5.57E-03 | -11.59 | 5.01  | 2.07E-02 | -16.51  | 11.02  | 1.34E-01 | -9.85  | 12.66 | 4.37E-01 | -4.59  | 8.90  | 6.06E-01 |
| cg18574274 | 8.55   | 3.09  | 5.57E-03 | 7.79   | 7.58  | 3.04E-01 | -1.73   | 10.94  | 8.74E-01 | 10.79  | 3.90  | 5.70E-03 | 5.05   | 8.59  | 5.56E-01 |
| cg27126872 | 7.42   | 2.68  | 5.57E-03 | 5.85   | 3.94  | 1.37E-01 | 10.77   | 5.69   | 5.82E-02 | -1.11  | 7.67  | 8.85E-01 | 12.72  | 6.09  | 3.68E-02 |
| cg05452406 | 16.78  | 6.05  | 5.57E-03 | 27.87  | 16.03 | 8.22E-02 | 20.29   | 21.97  | 3.56E-01 | 13.00  | 8.51  | 1.27E-01 | 17.01  | 11.53 | 1.40E-01 |
| cg01100912 | 19.01  | 6.86  | 5.58E-03 | 25.79  | 21.53 | 2.31E-01 | 25.11   | 30.22  | 4.06E-01 | 16.76  | 8.55  | 5.00E-02 | 21.21  | 15.20 | 1.63E-01 |
| cg02930951 | 20.79  | 7.50  | 5.58E-03 | 17.93  | 12.45 | 1.50E-01 | 31.22   | 14.55  | 3.19E-02 | 17.41  | 15.98 | 2.76E-01 | 14.24  | 19.33 | 4.61E-01 |
| cg24878005 | 30.44  | 10.98 | 5.58E-03 | 32.49  | 19.55 | 9.66E-02 | 10.04   | 24.27  | 6.79E-01 | 38.17  | 18.36 | 3.76E-02 | 36.71  | 31.47 | 2.43E-01 |
| cg11702455 | 18.44  | 6.65  | 5.58E-03 | 29.54  | 15.18 | 5.16E-02 | 28.85   | 32.85  | 3.80E-01 | 12.13  | 8.01  | 1.30E-01 | 41.98  | 24.07 | 8.12E-02 |
| cg23415916 | -20.98 | 7.57  | 5.59E-03 | -0.39  | 19.99 | 9.84E-01 | -39.26  | 26.61  | 1.40E-01 | -22.62 | 9.02  | 1.22E-02 | -25.35 | 28.22 | 3.69E-01 |
| cg06221470 | 20.13  | 7.27  | 5.60E-03 | 15.92  | 11.81 | 1.78E-01 | -21.52  | 47.18  | 6.48E-01 | 24.08  | 10.12 | 1.74E-02 | 26.71  | 25.24 | 2.90E-01 |
| cg24866764 | -9.33  | 3.37  | 5.60E-03 | -7.63  | 7.17  | 2.87E-01 | -1.35   | 10.53  | 8.98E-01 | -9.49  | 4.47  | 3.37E-02 | -19.51 | 10.23 | 5.65E-02 |
| cg09692822 | 24.02  | 8.67  | 5.61E-03 | 43.14  | 17.65 | 1.45E-02 | 25.17   | 16.58  | 1.29E-01 | 8.70   | 14.51 | 5.49E-01 | 28.23  | 24.21 | 2.43E-01 |
| cg10092198 | -12.57 | 4.54  | 5.61E-03 | -17.05 | 7.58  | 2.45E-02 | -7.96   | 10.62  | 4.54E-01 | -7.54  | 8.67  | 3.85E-01 | -15.94 | 10.57 | 1.31E-01 |
| cg24497686 | -16.00 | 5.78  | 5.61E-03 | -20.88 | 14.90 | 1.61E-01 | 7.18    | 35.50  | 8.40E-01 | -14.27 | 6.87  | 3.79E-02 | -25.38 | 16.88 | 1.33E-01 |
| cg17288560 | 9.21   | 3.33  | 5.62E-03 | 9.49   | 4.52  | 3.57E-02 | 10.77   | 7.10   | 1.30E-01 | 4.21   | 12.73 | 7.41E-01 | 8.32   | 8.06  | 3.02E-01 |
| cg22750001 | -11.49 | 4.15  | 5.63E-03 | -12.32 | 9.25  | 1.83E-01 | -25.50  | 18.20  | 1.61E-01 | -9.36  | 5.21  | 7.25E-02 | -15.51 | 12.36 | 2.09E-01 |
| cg08799778 | 18.20  | 6.57  | 5.63E-03 | 14.02  | 16.41 | 3.93E-01 | 16.73   | 20.03  | 4.03E-01 | 19.52  | 8.04  | 1.52E-02 | 17.33  | 26.05 | 5.06E-01 |
| cg08135278 | -36.72 | 13.26 | 5.63E-03 | -18.16 | 42.78 | 6.71E-01 | -140.18 | 136.13 | 3.03E-01 | -38.64 | 14.37 | 7.18E-03 | -17.33 | 64.02 | 7.87E-01 |
| cg17289597 | 14.01  | 5.06  | 5.63E-03 | 8.49   | 7.01  | 2.26E-01 | 28.00   | 9.99   | 5.08E-03 | 19.90  | 15.42 | 1.97E-01 | 6.41   | 11.35 | 5.72E-01 |
| cg07142797 | 25.92  | 9.36  | 5.63E-03 | 12.64  | 20.84 | 5.44E-01 | 5.92    | 36.37  | 8.71E-01 | 33.12  | 12.13 | 6.35E-03 | 23.89  | 25.34 | 3.46E-01 |
| cg10086141 | -43.28 | 15.63 | 5.63E-03 | -42.07 | 19.60 | 3.18E-02 | -59.35  | 51.25  | 2.47E-01 | -76.34 | 68.88 | 2.68E-01 | -32.20 | 33.41 | 3.35E-01 |
| cg02861178 | -25.82 | 9.33  | 5.64E-03 | -27.02 | 13.04 | 3.83E-02 | -43.99  | 27.62  | 1.11E-01 | 7.76   | 36.41 | 8.31E-01 | -24.24 | 16.77 | 1.48E-01 |
| cg16701559 | -20.83 | 7.52  | 5.64E-03 | -29.00 | 13.95 | 3.75E-02 | 3.87    | 24.97  | 8.77E-01 | -23.93 | 10.50 | 2.27E-02 | -4.33  | 23.24 | 8.52E-01 |
| cg21541120 | 30.58  | 11.05 | 5.65E-03 | 8.22   | 28.51 | 7.73E-01 | -109.61 | 118.24 | 3.54E-01 | 37.70  | 12.73 | 3.06E-03 | 21.72  | 37.37 | 5.61E-01 |
| cg18067096 | -14.58 | 5.27  | 5.65E-03 | -20.21 | 12.77 | 1.14E-01 | -18.62  | 18.18  | 3.06E-01 | -12.78 | 6.60  | 5.28E-02 | -13.19 | 15.98 | 4.09E-01 |
| cg14060020 | 17.09  | 6.17  | 5.65E-03 | 26.25  | 9.13  | 4.05E-03 | 10.04   | 11.30  | 3.74E-01 | 9.65   | 17.53 | 5.82E-01 | 7.40   | 17.81 | 6.78E-01 |
| cg19056833 | 30.39  | 10.98 | 5.65E-03 | 18.48  | 20.55 | 3.69E-01 | -31.29  | 54.94  | 5.69E-01 | 42.97  | 14.80 | 3.68E-03 | 21.81  | 31.25 | 4.85E-01 |
| cg27175024 | -7.09  | 2.56  | 5.65E-03 | -7.31  | 3.86  | 5.86E-02 | -4.32   | 5.58   | 4.38E-01 | -5.16  | 8.16  | 5.27E-01 | -9.80  | 5.12  | 5.55E-02 |
| cg04436383 | -12.46 | 4.50  | 5.66E-03 | -21.47 | 9.44  | 2.30E-02 | -4.99   | 15.00  | 7.39E-01 | -11.46 | 6.21  | 6.49E-02 | -7.03  | 11.41 | 5.38E-01 |
| cg20750319 | -10.14 | 3.66  | 5.66E-03 | -11.65 | 5.55  | 3.58E-02 | -16.28  | 8.96   | 6.93E-02 | -4.83  | 8.04  | 5.48E-01 | -7.06  | 8.42  | 4.01E-01 |

|            |        |       |          |        |       |          |         |        |          |        |       |          |        |       |          |
|------------|--------|-------|----------|--------|-------|----------|---------|--------|----------|--------|-------|----------|--------|-------|----------|
| cg13723693 | 40.10  | 14.49 | 5.66E-03 | 37.27  | 40.54 | 3.58E-01 | -143.41 | 198.81 | 4.71E-01 | 42.41  | 16.18 | 8.76E-03 | 32.14  | 57.22 | 5.74E-01 |
| cg07754138 | 36.44  | 13.17 | 5.66E-03 | 5.31   | 34.52 | 8.78E-01 | -100.08 | 162.93 | 5.39E-01 | 39.21  | 14.82 | 8.16E-03 | 91.60  | 54.40 | 9.22E-02 |
| cg25197500 | 5.20   | 1.88  | 5.66E-03 | 5.69   | 2.54  | 2.53E-02 | 5.43    | 4.45   | 2.22E-01 | 5.91   | 4.22  | 1.61E-01 | -0.67  | 6.83  | 9.22E-01 |
| cg11841394 | 25.31  | 9.15  | 5.66E-03 | 20.72  | 12.82 | 1.06E-01 | 9.46    | 26.55  | 7.22E-01 | 35.68  | 30.06 | 2.35E-01 | 36.93  | 17.29 | 3.27E-02 |
| cg14204266 | -35.51 | 12.84 | 5.67E-03 | -41.94 | 20.70 | 4.27E-02 | -3.86   | 61.20  | 9.50E-01 | -17.39 | 24.24 | 4.73E-01 | -49.28 | 23.81 | 3.84E-02 |
| cg17427615 | 18.47  | 6.68  | 5.67E-03 | 20.75  | 9.86  | 3.54E-02 | 17.66   | 12.91  | 1.71E-01 | 39.79  | 21.04 | 5.86E-02 | 1.31   | 16.04 | 9.35E-01 |
| cg03128060 | 7.65   | 2.76  | 5.67E-03 | 3.50   | 2.81  | 2.12E-01 | 10.95   | 4.59   | 1.69E-02 | 18.15  | 7.83  | 2.05E-02 | 6.98   | 5.35  | 1.92E-01 |
| cg04120329 | -9.03  | 3.26  | 5.67E-03 | -5.75  | 4.67  | 2.17E-01 | -9.38   | 7.00   | 1.80E-01 | -14.96 | 11.53 | 1.94E-01 | -13.97 | 7.07  | 4.83E-02 |
| cg23585979 | 37.31  | 13.49 | 5.67E-03 | 43.78  | 20.12 | 2.95E-02 | -1.86   | 34.10  | 9.57E-01 | 89.28  | 42.23 | 3.45E-02 | 30.37  | 24.64 | 2.18E-01 |
| cg25669309 | -32.13 | 11.62 | 5.67E-03 | -21.02 | 38.84 | 5.88E-01 | -150.35 | 117.90 | 2.02E-01 | -35.19 | 12.70 | 5.60E-03 | 9.66   | 45.59 | 8.32E-01 |
| cg17629322 | -14.05 | 5.08  | 5.67E-03 | -26.67 | 13.06 | 4.11E-02 | -5.86   | 22.20  | 7.92E-01 | -14.57 | 6.10  | 1.69E-02 | 3.86   | 15.84 | 8.07E-01 |
| cg19856845 | 13.72  | 4.96  | 5.68E-03 | 23.25  | 8.09  | 4.03E-03 | 13.15   | 13.33  | 3.24E-01 | 9.75   | 9.58  | 3.08E-01 | 2.44   | 10.66 | 8.19E-01 |
| cg03725447 | 19.62  | 7.09  | 5.68E-03 | 16.38  | 16.57 | 3.23E-01 | 7.03    | 36.38  | 8.47E-01 | 22.80  | 8.69  | 8.67E-03 | 10.22  | 21.22 | 6.30E-01 |
| cg21191176 | -21.95 | 7.94  | 5.69E-03 | -19.66 | 18.01 | 2.75E-01 | -37.31  | 41.43  | 3.68E-01 | -17.65 | 9.62  | 6.66E-02 | -53.63 | 26.67 | 4.43E-02 |
| cg14936968 | 25.30  | 9.15  | 5.69E-03 | 46.37  | 24.45 | 5.79E-02 | 17.54   | 45.31  | 6.99E-01 | 24.68  | 11.59 | 3.32E-02 | 13.80  | 20.66 | 5.04E-01 |
| cg27363829 | 11.77  | 4.26  | 5.69E-03 | 21.55  | 9.95  | 3.03E-02 | -0.45   | 12.85  | 9.72E-01 | 14.36  | 6.39  | 2.46E-02 | 5.71   | 8.30  | 4.91E-01 |
| cg07165459 | -41.49 | 15.01 | 5.70E-03 | -40.48 | 21.17 | 5.59E-02 | -64.67  | 49.20  | 1.89E-01 | -40.66 | 51.38 | 4.29E-01 | -36.54 | 26.57 | 1.69E-01 |
| cg18269183 | 27.23  | 9.85  | 5.71E-03 | 39.39  | 13.86 | 4.48E-03 | 30.49   | 39.68  | 4.42E-01 | 39.66  | 30.40 | 1.92E-01 | 3.91   | 17.20 | 8.20E-01 |
| cg22633936 | -21.03 | 7.61  | 5.71E-03 | -44.44 | 19.46 | 2.24E-02 | -21.20  | 40.27  | 5.99E-01 | -15.80 | 8.87  | 7.49E-02 | -24.54 | 27.64 | 3.75E-01 |
| cg24554151 | 6.79   | 2.45  | 5.71E-03 | 8.16   | 4.31  | 5.81E-02 | 10.67   | 5.17   | 3.90E-02 | 2.63   | 4.39  | 5.50E-01 | 6.60   | 6.61  | 3.18E-01 |
| cg02532096 | 16.43  | 5.95  | 5.72E-03 | 26.70  | 10.63 | 1.20E-02 | -3.30   | 16.21  | 8.39E-01 | 16.13  | 11.15 | 1.48E-01 | 14.68  | 11.48 | 2.01E-01 |
| cg16643706 | -10.88 | 3.94  | 5.72E-03 | -22.69 | 9.76  | 2.01E-02 | 4.60    | 20.61  | 8.23E-01 | -9.22  | 4.62  | 4.58E-02 | -8.76  | 14.43 | 5.44E-01 |
| cg01583131 | 19.61  | 7.10  | 5.72E-03 | 30.32  | 10.62 | 4.29E-03 | 14.04   | 15.63  | 3.69E-01 | 27.66  | 12.64 | 2.87E-02 | 0.22   | 13.17 | 9.87E-01 |
| cg05059438 | -22.73 | 8.22  | 5.73E-03 | -33.21 | 13.98 | 1.75E-02 | -11.77  | 15.20  | 4.39E-01 | -19.95 | 18.40 | 2.78E-01 | -23.58 | 20.48 | 2.50E-01 |
| cg06315149 | 18.06  | 6.54  | 5.73E-03 | 2.79   | 16.61 | 8.67E-01 | 12.91   | 21.99  | 5.57E-01 | 20.79  | 8.07  | 9.96E-03 | 28.38  | 20.69 | 1.70E-01 |
| cg19052164 | -12.48 | 4.52  | 5.73E-03 | -21.24 | 7.25  | 3.41E-03 | -2.59   | 10.19  | 8.00E-01 | -6.33  | 10.06 | 5.29E-01 | -11.49 | 9.77  | 2.40E-01 |
| cg14866032 | -5.50  | 1.99  | 5.73E-03 | -5.24  | 2.97  | 7.79E-02 | -5.94   | 3.77   | 1.15E-01 | -3.51  | 7.60  | 6.44E-01 | -6.11  | 4.39  | 1.64E-01 |
| cg18795786 | -12.10 | 4.38  | 5.74E-03 | -23.24 | 7.61  | 2.25E-03 | -17.63  | 11.62  | 1.29E-01 | -7.18  | 4.31  | 9.56E-02 | -5.07  | 10.73 | 6.37E-01 |
| cg25093234 | -55.51 | 20.10 | 5.74E-03 | -44.03 | 27.05 | 1.04E-01 | -112.30 | 92.42  | 2.24E-01 | -49.80 | 40.86 | 2.23E-01 | -87.24 | 50.42 | 8.36E-02 |
| cg23277061 | 20.71  | 7.50  | 5.74E-03 | 19.00  | 11.75 | 1.06E-01 | 22.37   | 14.08  | 1.12E-01 | 30.46  | 19.67 | 1.22E-01 | 13.44  | 18.53 | 4.68E-01 |
| cg14101604 | 16.38  | 5.93  | 5.74E-03 | 4.15   | 15.45 | 7.88E-01 | -22.91  | 54.64  | 6.75E-01 | 20.71  | 6.73  | 2.08E-03 | -0.77  | 23.46 | 9.74E-01 |
| cg13906860 | -6.34  | 2.29  | 5.74E-03 | -8.42  | 3.37  | 1.25E-02 | -9.41   | 5.40   | 8.12E-02 | -0.87  | 6.25  | 8.89E-01 | -2.79  | 4.88  | 5.68E-01 |
| cg19296354 | 15.36  | 5.56  | 5.75E-03 | 25.05  | 8.87  | 4.75E-03 | 11.17   | 10.51  | 2.88E-01 | 8.60   | 12.65 | 4.97E-01 | 5.43   | 15.20 | 7.21E-01 |
| cg25983305 | -42.26 | 15.30 | 5.75E-03 | -16.02 | 39.19 | 6.83E-01 | 32.16   | 224.15 | 8.86E-01 | -47.26 | 17.70 | 7.60E-03 | -48.66 | 49.40 | 3.25E-01 |
| cg11016847 | 16.66  | 6.03  | 5.75E-03 | 16.91  | 10.25 | 9.88E-02 | 19.72   | 21.32  | 3.55E-01 | 20.33  | 8.65  | 1.87E-02 | -7.63  | 20.41 | 7.08E-01 |

|            |        |       |          |         |       |          |         |        |          |         |       |          |        |       |          |
|------------|--------|-------|----------|---------|-------|----------|---------|--------|----------|---------|-------|----------|--------|-------|----------|
| cg14675869 | -16.26 | 5.89  | 5.75E-03 | -12.76  | 11.90 | 2.83E-01 | -32.10  | 29.36  | 2.74E-01 | -15.06  | 7.67  | 4.96E-02 | -23.61 | 16.60 | 1.55E-01 |
| cg24948990 | 40.43  | 14.64 | 5.76E-03 | 49.09   | 45.36 | 2.79E-01 | 46.47   | 52.91  | 3.80E-01 | 42.51   | 17.22 | 1.36E-02 | 10.73  | 47.08 | 8.20E-01 |
| cg05967403 | 14.55  | 5.27  | 5.76E-03 | 21.48   | 8.02  | 7.42E-03 | 10.35   | 13.34  | 4.38E-01 | 5.76    | 13.98 | 6.80E-01 | 10.53  | 10.12 | 2.98E-01 |
| cg02882448 | 26.99  | 9.77  | 5.76E-03 | 44.32   | 34.68 | 2.01E-01 | -0.13   | 147.68 | 9.99E-01 | 27.49   | 10.57 | 9.32E-03 | -0.50  | 39.40 | 9.90E-01 |
| cg07089235 | -21.37 | 7.74  | 5.77E-03 | 5.62    | 29.37 | 8.48E-01 | 25.80   | 92.39  | 7.80E-01 | -22.87  | 8.31  | 5.95E-03 | -37.39 | 32.53 | 2.50E-01 |
| cg16874442 | 32.93  | 11.93 | 5.77E-03 | 49.53   | 16.54 | 2.76E-03 | 41.69   | 31.83  | 1.90E-01 | 41.28   | 25.21 | 1.02E-01 | 2.73   | 19.36 | 8.88E-01 |
| cg02137984 | -14.83 | 5.37  | 5.77E-03 | -23.56  | 16.72 | 1.59E-01 | -26.52  | 34.64  | 4.44E-01 | -11.64  | 6.15  | 5.85E-02 | -25.98 | 16.09 | 1.06E-01 |
| cg16910293 | -21.32 | 7.72  | 5.77E-03 | -19.64  | 21.14 | 3.53E-01 | 16.91   | 43.73  | 6.99E-01 | -25.44  | 8.89  | 4.24E-03 | -0.52  | 27.15 | 9.85E-01 |
| cg09273112 | 5.55   | 2.01  | 5.78E-03 | 3.76    | 2.67  | 1.60E-01 | 11.66   | 4.35   | 7.38E-03 | 6.11    | 3.91  | 1.18E-01 | -0.76  | 7.06  | 9.14E-01 |
| cg06085579 | -10.78 | 3.90  | 5.78E-03 | -12.84  | 5.55  | 2.07E-02 | -10.91  | 7.56   | 1.49E-01 | -10.18  | 12.43 | 4.13E-01 | -3.61  | 10.46 | 7.30E-01 |
| cg12768770 | -29.72 | 10.77 | 5.78E-03 | -26.20  | 12.17 | 3.14E-02 | 28.02   | 41.56  | 5.00E-01 | -20.61  | 54.90 | 7.07E-01 | -49.77 | 18.07 | 5.87E-03 |
| cg07875121 | 13.06  | 4.73  | 5.79E-03 | 12.98   | 6.54  | 4.73E-02 | 18.52   | 11.52  | 1.08E-01 | 15.23   | 12.13 | 2.09E-01 | 5.29   | 12.01 | 6.60E-01 |
| cg11312408 | 15.99  | 5.79  | 5.79E-03 | 19.86   | 9.24  | 3.17E-02 | 18.40   | 14.98  | 2.19E-01 | 9.81    | 12.12 | 4.19E-01 | 13.93  | 12.11 | 2.50E-01 |
| cg00538604 | -68.41 | 24.79 | 5.79E-03 | -55.47  | 33.31 | 9.59E-02 | 38.75   | 139.60 | 7.81E-01 | -120.37 | 48.48 | 1.30E-02 | -48.54 | 63.35 | 4.44E-01 |
| cg10358816 | 36.25  | 13.14 | 5.79E-03 | 21.63   | 39.65 | 5.85E-01 | -17.60  | 124.20 | 8.87E-01 | 39.19   | 14.51 | 6.90E-03 | 32.79  | 54.12 | 5.45E-01 |
| cg05502283 | 24.53  | 8.89  | 5.79E-03 | 37.39   | 19.08 | 5.00E-02 | 21.09   | 16.02  | 1.88E-01 | 21.47   | 15.17 | 1.57E-01 | 19.34  | 24.52 | 4.30E-01 |
| cg16729495 | 47.60  | 17.25 | 5.79E-03 | -14.33  | 39.13 | 7.14E-01 | 50.23   | 115.99 | 6.65E-01 | 61.91   | 18.61 | 8.79E-04 | 61.40  | 50.59 | 2.25E-01 |
| cg03163184 | -10.59 | 3.84  | 5.79E-03 | -15.59  | 5.67  | 6.01E-03 | -8.78   | 9.59   | 3.60E-01 | 4.21    | 11.74 | 7.20E-01 | -9.08  | 7.31  | 2.14E-01 |
| cg25007511 | -12.10 | 4.39  | 5.79E-03 | -22.29  | 7.92  | 4.90E-03 | -20.74  | 19.60  | 2.90E-01 | -6.12   | 5.00  | 2.20E-01 | -14.67 | 13.26 | 2.69E-01 |
| cg24045357 | -10.26 | 3.72  | 5.79E-03 | -9.83   | 5.08  | 5.29E-02 | -16.13  | 8.18   | 4.85E-02 | 9.23    | 13.42 | 4.92E-01 | -13.10 | 8.76  | 1.35E-01 |
| cg24137216 | 41.92  | 15.20 | 5.80E-03 | 40.59   | 20.86 | 5.16E-02 | 11.55   | 53.64  | 8.30E-01 | 3.09    | 43.71 | 9.44E-01 | 71.17  | 29.35 | 1.53E-02 |
| cg13659951 | 26.20  | 9.50  | 5.80E-03 | 18.56   | 27.90 | 5.06E-01 | -22.80  | 65.88  | 7.29E-01 | 27.63   | 10.70 | 9.83E-03 | 36.47  | 34.50 | 2.90E-01 |
| cg17473398 | 38.69  | 14.03 | 5.81E-03 | 74.68   | 21.64 | 5.58E-04 | 21.06   | 24.20  | 3.84E-01 | 18.57   | 18.25 | 3.09E-01 | 44.60  | 29.32 | 1.28E-01 |
| cg18547371 | -54.25 | 19.67 | 5.82E-03 | -120.77 | 69.70 | 8.31E-02 | -159.64 | 251.47 | 5.26E-01 | -44.42  | 21.46 | 3.85E-02 | -85.70 | 72.42 | 2.37E-01 |
| cg24196566 | -14.40 | 5.22  | 5.82E-03 | -21.31  | 12.84 | 9.71E-02 | -2.99   | 19.72  | 8.79E-01 | -15.00  | 6.33  | 1.78E-02 | -5.52  | 18.00 | 7.59E-01 |
| cg00879667 | 23.24  | 8.43  | 5.82E-03 | 22.41   | 13.74 | 1.03E-01 | 34.96   | 15.87  | 2.76E-02 | 15.26   | 17.57 | 3.85E-01 | 12.88  | 25.25 | 6.10E-01 |
| cg03152720 | 19.38  | 7.03  | 5.82E-03 | 39.24   | 20.33 | 5.36E-02 | 33.62   | 30.11  | 2.64E-01 | 13.96   | 8.05  | 8.28E-02 | 35.15  | 28.05 | 2.10E-01 |
| cg13729043 | 11.73  | 4.25  | 5.83E-03 | 9.78    | 9.03  | 2.79E-01 | 18.07   | 20.39  | 3.75E-01 | 9.51    | 5.40  | 7.83E-02 | 25.12  | 12.57 | 4.57E-02 |
| cg19290902 | -10.54 | 3.82  | 5.84E-03 | -15.85  | 7.23  | 2.84E-02 | -3.68   | 11.47  | 7.49E-01 | -9.81   | 5.59  | 7.92E-02 | -7.85  | 10.15 | 4.39E-01 |
| cg20098710 | 15.65  | 5.68  | 5.84E-03 | 9.79    | 9.26  | 2.90E-01 | 24.03   | 11.36  | 3.44E-02 | 8.01    | 13.97 | 5.66E-01 | 22.20  | 12.41 | 7.35E-02 |
| cg08430516 | 32.24  | 11.69 | 5.84E-03 | 3.17    | 30.29 | 9.17E-01 | -44.74  | 108.36 | 6.80E-01 | 36.52   | 13.45 | 6.61E-03 | 56.23  | 40.58 | 1.66E-01 |
| cg07915528 | -56.11 | 20.36 | 5.85E-03 | -54.71  | 23.89 | 2.20E-02 | -129.22 | 42.75  | 2.51E-03 | -15.81  | 21.29 | 4.58E-01 | -64.56 | 30.84 | 3.63E-02 |
| cg19110758 | -16.28 | 5.91  | 5.85E-03 | -20.67  | 8.80  | 1.88E-02 | -20.67  | 13.89  | 1.37E-01 | -9.78   | 17.44 | 5.75E-01 | -8.28  | 11.73 | 4.80E-01 |
| cg17557230 | 24.57  | 8.92  | 5.87E-03 | 14.92   | 22.19 | 5.01E-01 | 50.07   | 68.14  | 4.62E-01 | 29.85   | 10.43 | 4.22E-03 | -5.72  | 29.71 | 8.47E-01 |
| cg14862385 | -21.36 | 7.75  | 5.87E-03 | -13.71  | 22.80 | 5.48E-01 | -65.14  | 57.57  | 2.58E-01 | -22.80  | 8.59  | 7.92E-03 | -0.10  | 34.30 | 9.98E-01 |



|            |        |       |          |        |       |          |         |        |          |        |        |          |        |       |          |
|------------|--------|-------|----------|--------|-------|----------|---------|--------|----------|--------|--------|----------|--------|-------|----------|
| cg14412794 | -18.18 | 6.60  | 5.87E-03 | -22.69 | 11.48 | 4.81E-02 | -32.02  | 22.76  | 1.60E-01 | -14.56 | 10.71  | 1.74E-01 | -11.97 | 14.53 | 4.10E-01 |
| cg13137476 | 21.20  | 7.70  | 5.87E-03 | 12.04  | 19.97 | 5.47E-01 | -24.96  | 77.61  | 7.48E-01 | 25.52  | 8.78   | 3.65E-03 | 0.72   | 28.38 | 9.80E-01 |
| cg19323865 | -21.43 | 7.78  | 5.87E-03 | 3.00   | 20.53 | 8.84E-01 | -18.98  | 30.75  | 5.37E-01 | -25.51 | 9.04   | 4.78E-03 | -34.02 | 34.28 | 3.21E-01 |
| cg14855367 | -10.91 | 3.96  | 5.88E-03 | -14.33 | 8.54  | 9.34E-02 | -11.79  | 9.95   | 2.36E-01 | -10.32 | 5.69   | 6.95E-02 | -6.74  | 10.51 | 5.21E-01 |
| cg23124486 | 20.53  | 7.45  | 5.88E-03 | 16.61  | 16.64 | 3.18E-01 | -33.21  | 37.57  | 3.77E-01 | 22.73  | 9.07   | 1.22E-02 | 37.16  | 25.55 | 1.46E-01 |
| cg08231348 | 20.68  | 7.51  | 5.89E-03 | 33.62  | 33.22 | 3.11E-01 | 76.52   | 101.19 | 4.50E-01 | 21.74  | 8.24   | 8.38E-03 | 4.50   | 22.21 | 8.40E-01 |
| cg14763104 | -13.01 | 4.72  | 5.89E-03 | -19.37 | 6.83  | 4.58E-03 | -14.80  | 10.51  | 1.59E-01 | -5.93  | 12.10  | 6.24E-01 | 0.87   | 11.54 | 9.40E-01 |
| cg17369513 | -19.95 | 7.24  | 5.89E-03 | -36.23 | 17.57 | 3.92E-02 | -12.60  | 29.94  | 6.74E-01 | -17.51 | 8.86   | 4.83E-02 | -13.12 | 22.49 | 5.60E-01 |
| cg02481934 | -15.31 | 5.56  | 5.89E-03 | -22.48 | 9.55  | 1.85E-02 | -19.27  | 14.12  | 1.72E-01 | -14.17 | 10.21  | 1.65E-01 | -2.39  | 12.14 | 8.44E-01 |
| cg09105479 | 38.63  | 14.03 | 5.90E-03 | -5.68  | 58.01 | 9.22E-01 | -89.15  | 246.90 | 7.18E-01 | 43.90  | 14.81  | 3.04E-03 | -3.06  | 69.02 | 9.65E-01 |
| cg16442712 | -13.81 | 5.02  | 5.90E-03 | -16.14 | 15.15 | 2.87E-01 | -16.24  | 22.76  | 4.75E-01 | -12.24 | 5.72   | 3.24E-02 | -25.38 | 18.65 | 1.74E-01 |
| cg00363811 | -21.69 | 7.88  | 5.90E-03 | -16.82 | 26.93 | 5.32E-01 | -66.99  | 89.75  | 4.55E-01 | -20.84 | 8.52   | 1.44E-02 | -37.19 | 34.76 | 2.85E-01 |
| cg15516314 | -14.91 | 5.42  | 5.91E-03 | -18.77 | 14.71 | 2.02E-01 | 16.61   | 20.62  | 4.21E-01 | -15.61 | 6.40   | 1.46E-02 | -29.49 | 19.32 | 1.27E-01 |
| cg09351715 | 53.88  | 19.57 | 5.91E-03 | 71.72  | 27.74 | 9.73E-03 | 19.15   | 53.45  | 7.20E-01 | 9.29   | 56.54  | 8.70E-01 | 58.39  | 39.30 | 1.37E-01 |
| cg26019112 | 19.08  | 6.93  | 5.92E-03 | 17.90  | 12.82 | 1.63E-01 | -0.43   | 20.26  | 9.83E-01 | 20.79  | 10.20  | 4.14E-02 | 33.35  | 19.34 | 8.45E-02 |
| cg23963071 | -9.61  | 3.49  | 5.92E-03 | -9.34  | 4.58  | 4.16E-02 | -18.93  | 8.05   | 1.87E-02 | -4.76  | 12.34  | 7.00E-01 | -1.64  | 8.97  | 8.55E-01 |
| cg00295206 | 37.16  | 13.50 | 5.92E-03 | 25.24  | 17.29 | 1.44E-01 | 27.64   | 43.20  | 5.22E-01 | 66.89  | 66.73  | 3.16E-01 | 64.87  | 26.91 | 1.59E-02 |
| cg00241663 | 23.37  | 8.49  | 5.92E-03 | 24.61  | 11.82 | 3.73E-02 | 7.91    | 22.25  | 7.22E-01 | 34.32  | 29.47  | 2.44E-01 | 26.12  | 16.81 | 1.20E-01 |
| cg14394327 | -20.01 | 7.27  | 5.92E-03 | -39.21 | 20.82 | 5.96E-02 | 6.44    | 48.86  | 8.95E-01 | -18.10 | 8.13   | 2.59E-02 | -15.86 | 31.03 | 6.09E-01 |
| cg04546061 | 21.28  | 7.73  | 5.92E-03 | 18.25  | 15.08 | 2.26E-01 | 2.80    | 31.73  | 9.30E-01 | 28.46  | 10.39  | 6.15E-03 | 4.42   | 21.98 | 8.41E-01 |
| cg16121685 | -40.61 | 14.76 | 5.93E-03 | -46.19 | 27.84 | 9.71E-02 | -23.18  | 58.40  | 6.91E-01 | -45.21 | 21.52  | 3.57E-02 | -26.45 | 34.32 | 4.41E-01 |
| cg16231923 | -10.29 | 3.74  | 5.93E-03 | -5.70  | 4.83  | 2.38E-01 | -6.13   | 6.52   | 3.47E-01 | -11.77 | 5.87   | 4.48E-02 | -25.92 | 9.14  | 4.57E-03 |
| cg19388016 | 39.45  | 14.34 | 5.94E-03 | 40.90  | 26.79 | 1.27E-01 | 31.29   | 133.67 | 8.15E-01 | 36.51  | 18.32  | 4.63E-02 | 56.04  | 47.97 | 2.43E-01 |
| cg13552867 | 21.46  | 7.80  | 5.94E-03 | 20.58  | 15.63 | 1.88E-01 | 0.53    | 38.71  | 9.89E-01 | 25.35  | 10.08  | 1.19E-02 | 10.19  | 23.35 | 6.62E-01 |
| cg04611649 | -16.37 | 5.95  | 5.94E-03 | -9.06  | 12.41 | 4.65E-01 | -49.63  | 22.10  | 2.48E-02 | -13.42 | 6.28   | 3.26E-02 | -30.43 | 21.05 | 1.48E-01 |
| cg05648303 | 17.22  | 6.26  | 5.94E-03 | 23.24  | 7.24  | 1.32E-03 | -1.89   | 14.83  | 8.99E-01 | 31.53  | 15.75  | 4.54E-02 | 8.81   | 12.04 | 4.64E-01 |
| cg12977625 | 28.30  | 10.29 | 5.95E-03 | 35.34  | 29.60 | 2.33E-01 | -14.75  | 71.40  | 8.36E-01 | 26.22  | 11.68  | 2.48E-02 | 48.48  | 35.89 | 1.77E-01 |
| cg21297992 | 37.54  | 13.65 | 5.95E-03 | 31.71  | 16.19 | 5.02E-02 | 24.42   | 18.41  | 1.85E-01 | 16.69  | 19.39  | 3.89E-01 | 83.50  | 21.43 | 9.80E-05 |
| cg02828023 | 18.45  | 6.71  | 5.95E-03 | 38.41  | 15.76 | 1.48E-02 | 18.44   | 20.24  | 3.62E-01 | 15.88  | 9.86   | 1.07E-01 | 8.59   | 13.52 | 5.25E-01 |
| cg26998274 | 18.85  | 6.85  | 5.95E-03 | 35.11  | 16.76 | 3.62E-02 | 41.33   | 40.98  | 3.13E-01 | 17.12  | 8.20   | 3.69E-02 | -1.23  | 20.99 | 9.53E-01 |
| cg24650915 | 22.07  | 8.02  | 5.95E-03 | 30.96  | 19.37 | 1.10E-01 | -2.31   | 25.01  | 9.26E-01 | 18.69  | 9.21   | 4.23E-02 | 58.62  | 26.99 | 2.98E-02 |
| cg15865243 | -7.61  | 2.77  | 5.96E-03 | -9.43  | 3.93  | 1.63E-02 | -5.63   | 5.89   | 3.39E-01 | 5.22   | 9.63   | 5.88E-01 | -10.55 | 6.18  | 8.76E-02 |
| cg08502490 | -57.67 | 20.97 | 5.96E-03 | -53.01 | 25.40 | 3.69E-02 | -185.31 | 142.48 | 1.93E-01 | -27.83 | 104.09 | 7.89E-01 | -64.03 | 41.45 | 1.22E-01 |
| cg16288089 | 15.00  | 5.45  | 5.96E-03 | 25.58  | 16.87 | 1.29E-01 | 10.12   | 29.39  | 7.30E-01 | 17.37  | 6.63   | 8.79E-03 | 1.20   | 12.70 | 9.25E-01 |
| cg21144338 | 18.33  | 6.67  | 5.96E-03 | 35.88  | 19.52 | 6.61E-02 | -8.29   | 23.57  | 7.25E-01 | 17.34  | 7.74   | 2.51E-02 | 31.64  | 26.85 | 2.39E-01 |

|            |        |       |          |        |       |          |         |        |          |        |       |          |        |       |          |
|------------|--------|-------|----------|--------|-------|----------|---------|--------|----------|--------|-------|----------|--------|-------|----------|
| cg10133935 | 6.84   | 2.49  | 5.96E-03 | 5.70   | 3.04  | 6.10E-02 | 16.06   | 6.70   | 1.65E-02 | 3.36   | 7.96  | 6.73E-01 | 5.09   | 8.06  | 5.27E-01 |
| cg13761284 | 26.80  | 9.75  | 5.96E-03 | 52.04  | 19.04 | 6.28E-03 | 6.49    | 21.40  | 7.62E-01 | 18.31  | 15.59 | 2.40E-01 | 33.08  | 25.53 | 1.95E-01 |
| cg02360514 | 11.67  | 4.25  | 5.96E-03 | 12.91  | 6.99  | 6.49E-02 | 19.78   | 8.71   | 2.32E-02 | 4.09   | 10.04 | 6.84E-01 | 6.92   | 9.14  | 4.49E-01 |
| cg15010390 | -28.62 | 10.41 | 5.97E-03 | -25.31 | 26.42 | 3.38E-01 | -42.80  | 44.68  | 3.38E-01 | -27.69 | 28.58 | 3.33E-01 | -28.42 | 12.83 | 2.68E-02 |
| cg12030690 | 29.00  | 10.55 | 5.97E-03 | 44.75  | 17.11 | 8.91E-03 | 22.67   | 33.06  | 4.93E-01 | 35.17  | 21.11 | 9.57E-02 | 3.35   | 20.37 | 8.69E-01 |
| cg14026106 | -10.15 | 3.69  | 5.97E-03 | -16.81 | 8.22  | 4.07E-02 | -3.95   | 10.61  | 7.09E-01 | -10.00 | 4.93  | 4.27E-02 | -5.79  | 10.78 | 5.91E-01 |
| cg06521562 | 15.88  | 5.78  | 5.98E-03 | 22.19  | 8.51  | 9.11E-03 | 16.39   | 10.94  | 1.34E-01 | 18.39  | 18.53 | 3.21E-01 | -4.34  | 14.32 | 7.62E-01 |
| cg02857074 | -9.01  | 3.28  | 5.98E-03 | -14.16 | 6.12  | 2.06E-02 | -2.98   | 10.17  | 7.70E-01 | -6.61  | 4.75  | 1.64E-01 | -11.28 | 9.05  | 2.13E-01 |
| cg15083678 | 14.52  | 5.28  | 5.98E-03 | 23.21  | 16.21 | 1.52E-01 | 41.78   | 20.71  | 4.37E-02 | 10.41  | 5.98  | 8.16E-02 | 25.49  | 24.27 | 2.94E-01 |
| cg03314100 | -23.91 | 8.70  | 5.98E-03 | -10.66 | 16.66 | 5.22E-01 | -14.48  | 34.19  | 6.72E-01 | -31.37 | 11.65 | 7.06E-03 | -24.43 | 26.82 | 3.62E-01 |
| cg16732469 | 41.20  | 14.99 | 5.98E-03 | 22.73  | 42.26 | 5.91E-01 | -20.74  | 150.48 | 8.90E-01 | 42.53  | 16.75 | 1.11E-02 | 70.71  | 59.58 | 2.35E-01 |
| cg10680411 | 21.78  | 7.92  | 5.98E-03 | 14.09  | 9.72  | 1.47E-01 | 46.90   | 26.20  | 7.34E-02 | 71.69  | 39.70 | 7.10E-02 | 22.70  | 14.35 | 1.14E-01 |
| cg16676676 | -74.07 | 26.95 | 5.98E-03 | -80.79 | 40.61 | 4.67E-02 | -160.86 | 154.12 | 2.97E-01 | -62.62 | 47.44 | 1.87E-01 | -64.79 | 59.30 | 2.75E-01 |
| cg20865806 | 32.25  | 11.73 | 5.99E-03 | 26.63  | 27.19 | 3.27E-01 | 126.05  | 118.16 | 2.86E-01 | 28.62  | 13.86 | 3.89E-02 | 63.64  | 39.80 | 1.10E-01 |
| cg04217515 | 7.79   | 2.83  | 5.99E-03 | 6.51   | 3.68  | 7.75E-02 | 12.43   | 5.80   | 3.22E-02 | 11.36  | 12.15 | 3.50E-01 | 3.09   | 8.36  | 7.12E-01 |
| cg25842633 | 14.14  | 5.15  | 5.99E-03 | 10.32  | 8.30  | 2.14E-01 | 14.87   | 24.28  | 5.40E-01 | 21.10  | 6.02  | 4.61E-04 | -5.29  | 14.06 | 7.07E-01 |
| cg20689661 | 25.82  | 9.40  | 6.00E-03 | 13.88  | 16.57 | 4.02E-01 | 24.43   | 39.03  | 5.31E-01 | 34.73  | 13.39 | 9.48E-03 | 22.18  | 26.29 | 3.99E-01 |
| cg22578425 | -12.14 | 4.42  | 6.00E-03 | -6.03  | 9.93  | 5.44E-01 | -2.60   | 14.70  | 8.60E-01 | -14.87 | 5.64  | 8.42E-03 | -16.14 | 14.03 | 2.50E-01 |
| cg12805764 | 51.42  | 18.72 | 6.01E-03 | 33.43  | 38.04 | 3.79E-01 | -82.85  | 163.08 | 6.11E-01 | 66.70  | 23.74 | 4.96E-03 | 24.04  | 53.33 | 6.52E-01 |
| cg20227886 | 30.87  | 11.24 | 6.02E-03 | 33.74  | 21.87 | 1.23E-01 | -32.53  | 59.14  | 5.82E-01 | 34.01  | 15.11 | 2.44E-02 | 29.51  | 29.36 | 3.15E-01 |
| cg00405190 | 6.62   | 2.41  | 6.02E-03 | 7.09   | 3.12  | 2.30E-02 | 9.03    | 5.77   | 1.17E-01 | 0.48   | 7.48  | 9.48E-01 | 6.12   | 6.88  | 3.73E-01 |
| cg00921219 | -11.90 | 4.33  | 6.03E-03 | -13.82 | 7.89  | 7.99E-02 | 5.26    | 20.26  | 7.95E-01 | -13.18 | 6.03  | 2.87E-02 | -8.53  | 11.74 | 4.67E-01 |
| cg25995212 | -16.10 | 5.86  | 6.03E-03 | -4.76  | 17.32 | 7.83E-01 | -35.92  | 23.30  | 1.23E-01 | -14.09 | 6.68  | 3.48E-02 | -47.20 | 25.89 | 6.84E-02 |
| cg05121093 | 18.11  | 6.60  | 6.03E-03 | 31.62  | 16.05 | 4.89E-02 | 27.32   | 42.09  | 5.16E-01 | 17.87  | 7.82  | 2.22E-02 | -6.57  | 21.44 | 7.59E-01 |
| cg09175843 | 26.20  | 9.54  | 6.04E-03 | 21.14  | 24.41 | 3.86E-01 | -2.63   | 85.59  | 9.75E-01 | 29.69  | 10.80 | 5.97E-03 | -3.41  | 41.13 | 9.34E-01 |
| cg02485642 | -20.36 | 7.42  | 6.04E-03 | -11.90 | 11.11 | 2.84E-01 | -9.31   | 37.22  | 8.02E-01 | -38.42 | 14.30 | 7.23E-03 | -17.72 | 14.94 | 2.35E-01 |
| cg11593111 | 27.97  | 10.19 | 6.04E-03 | 29.74  | 27.44 | 2.78E-01 | 98.72   | 135.44 | 4.66E-01 | 30.64  | 11.54 | 7.95E-03 | -7.10  | 36.55 | 8.46E-01 |
| cg13353942 | -12.91 | 4.70  | 6.04E-03 | -10.22 | 7.29  | 1.61E-01 | -16.18  | 9.82   | 9.94E-02 | -13.98 | 12.26 | 2.54E-01 | -13.94 | 10.33 | 1.77E-01 |
| cg15347348 | -21.58 | 7.86  | 6.05E-03 | -31.99 | 12.18 | 8.66E-03 | -33.64  | 15.21  | 2.70E-02 | -5.71  | 18.30 | 7.55E-01 | -4.29  | 15.76 | 7.86E-01 |
| cg26279253 | 18.28  | 6.66  | 6.05E-03 | 24.65  | 14.66 | 9.26E-02 | 5.67    | 24.95  | 8.20E-01 | 19.62  | 8.29  | 1.79E-02 | 1.57   | 24.01 | 9.48E-01 |
| cg20519373 | -9.40  | 3.42  | 6.06E-03 | -12.98 | 5.00  | 9.39E-03 | -6.15   | 6.98   | 3.78E-01 | -17.47 | 13.66 | 2.01E-01 | -3.20  | 7.19  | 6.57E-01 |
| cg03285219 | 18.74  | 6.83  | 6.07E-03 | 20.32  | 14.48 | 1.60E-01 | -14.22  | 36.66  | 6.98E-01 | 15.12  | 7.90  | 5.57E-02 | 48.95  | 20.93 | 1.93E-02 |
| cg05590982 | -14.64 | 5.34  | 6.08E-03 | -14.41 | 14.34 | 3.15E-01 | -3.60   | 18.18  | 8.43E-01 | -13.20 | 6.52  | 4.29E-02 | -32.99 | 16.39 | 4.42E-02 |
| cg00550498 | 19.24  | 7.01  | 6.08E-03 | 38.11  | 17.19 | 2.66E-02 | -12.59  | 38.22  | 7.42E-01 | 14.20  | 8.37  | 8.97E-02 | 34.31  | 22.45 | 1.26E-01 |
| cg02330121 | 27.40  | 9.99  | 6.09E-03 | 15.66  | 21.48 | 4.66E-01 | 7.28    | 31.32  | 8.16E-01 | 31.00  | 13.22 | 1.90E-02 | 50.08  | 29.92 | 9.41E-02 |

|            |        |       |          |        |       |          |         |        |          |        |       |          |         |       |          |
|------------|--------|-------|----------|--------|-------|----------|---------|--------|----------|--------|-------|----------|---------|-------|----------|
| cg17436506 | 35.52  | 12.95 | 6.09E-03 | 21.94  | 19.20 | 2.53E-01 | 67.51   | 29.56  | 2.24E-02 | 38.75  | 27.90 | 1.65E-01 | 30.74   | 34.86 | 3.78E-01 |
| cg00269033 | -28.22 | 10.29 | 6.09E-03 | -23.19 | 21.08 | 2.71E-01 | -30.93  | 47.67  | 5.16E-01 | -34.00 | 13.36 | 1.09E-02 | -9.00   | 29.39 | 7.59E-01 |
| cg26442107 | -89.27 | 32.55 | 6.10E-03 | -90.66 | 52.95 | 8.69E-02 | -132.43 | 225.07 | 5.56E-01 | -61.73 | 53.01 | 2.44E-01 | -129.17 | 68.73 | 6.02E-02 |
| cg22014112 | -10.95 | 3.99  | 6.11E-03 | -14.94 | 5.41  | 5.77E-03 | -18.28  | 14.43  | 2.05E-01 | -15.92 | 14.61 | 2.76E-01 | -0.75   | 7.23  | 9.17E-01 |
| cg00395579 | -21.82 | 7.96  | 6.11E-03 | -18.69 | 19.39 | 3.35E-01 | -69.86  | 34.01  | 3.99E-02 | -22.70 | 7.00  | 1.18E-03 | 7.56    | 25.56 | 7.67E-01 |
| cg16973406 | 16.17  | 5.90  | 6.12E-03 | 18.88  | 10.07 | 6.09E-02 | 23.46   | 12.85  | 6.79E-02 | 24.02  | 12.90 | 6.26E-02 | -1.13   | 12.10 | 9.26E-01 |
| cg12716367 | -13.92 | 5.08  | 6.12E-03 | -21.35 | 7.73  | 5.71E-03 | -6.47   | 13.78  | 6.38E-01 | -11.96 | 14.82 | 4.20E-01 | -7.66   | 9.05  | 3.97E-01 |
| cg24874254 | -8.19  | 2.99  | 6.12E-03 | -8.01  | 3.84  | 3.71E-02 | -13.88  | 5.96   | 1.99E-02 | 8.25   | 10.63 | 4.38E-01 | -8.42   | 6.23  | 1.76E-01 |
| cg15209604 | -16.71 | 6.10  | 6.13E-03 | -23.76 | 9.05  | 8.70E-03 | -10.05  | 13.54  | 4.58E-01 | -3.04  | 17.06 | 8.59E-01 | -16.27  | 13.12 | 2.15E-01 |
| cg04445871 | 16.14  | 5.89  | 6.13E-03 | 25.90  | 9.97  | 9.41E-03 | 7.85    | 16.43  | 6.33E-01 | 9.18   | 11.53 | 4.26E-01 | 14.15   | 11.50 | 2.19E-01 |
| cg13468400 | 25.16  | 9.18  | 6.13E-03 | 16.44  | 20.38 | 4.20E-01 | 39.60   | 19.88  | 4.64E-02 | 21.21  | 13.07 | 1.05E-01 | 32.23   | 30.53 | 2.91E-01 |
| cg24102622 | 39.36  | 14.36 | 6.14E-03 | 49.81  | 20.56 | 1.54E-02 | 18.22   | 47.23  | 7.00E-01 | 40.42  | 41.17 | 3.26E-01 | 28.36   | 26.32 | 2.81E-01 |
| cg19302831 | 53.75  | 19.62 | 6.14E-03 | 76.99  | 26.46 | 3.62E-03 | 7.84    | 63.27  | 9.01E-01 | 78.42  | 34.57 | 2.33E-02 | 5.03    | 36.59 | 8.91E-01 |
| cg12072529 | 24.50  | 8.94  | 6.15E-03 | 22.07  | 17.39 | 2.04E-01 | 37.42   | 23.11  | 1.05E-01 | 15.63  | 12.68 | 2.18E-01 | 59.47   | 29.97 | 4.73E-02 |
| cg06098215 | 7.83   | 2.86  | 6.15E-03 | 8.70   | 3.92  | 2.63E-02 | 6.46    | 6.80   | 3.42E-01 | 15.43  | 8.20  | 5.98E-02 | 1.08    | 6.93  | 8.76E-01 |
| cg13480465 | -12.83 | 4.68  | 6.16E-03 | -20.82 | 7.70  | 6.84E-03 | 3.51    | 10.99  | 7.49E-01 | -15.14 | 6.94  | 2.91E-02 | -9.41   | 10.78 | 3.83E-01 |
| cg11284411 | 6.80   | 2.48  | 6.16E-03 | 6.52   | 3.65  | 7.44E-02 | 5.16    | 7.76   | 5.06E-01 | 7.88   | 5.51  | 1.53E-01 | 7.17    | 5.16  | 1.65E-01 |
| cg15110127 | -25.89 | 9.45  | 6.16E-03 | -31.31 | 10.19 | 2.13E-03 | 59.98   | 75.66  | 4.28E-01 | 28.97  | 61.70 | 6.39E-01 | -5.85   | 29.72 | 8.44E-01 |
| cg04352288 | -13.73 | 5.01  | 6.16E-03 | -14.02 | 7.09  | 4.79E-02 | -12.13  | 15.83  | 4.44E-01 | -17.63 | 12.66 | 1.64E-01 | -11.26  | 10.17 | 2.68E-01 |
| cg19316579 | -6.64  | 2.43  | 6.17E-03 | -12.01 | 4.13  | 3.67E-03 | -5.31   | 5.80   | 3.60E-01 | -2.90  | 4.29  | 5.00E-01 | -4.05   | 6.03  | 5.01E-01 |
| cg25092206 | -52.20 | 19.06 | 6.17E-03 | -84.26 | 44.16 | 5.64E-02 | -171.13 | 257.95 | 5.07E-01 | -38.92 | 22.44 | 8.29E-02 | -86.34  | 64.71 | 1.82E-01 |
| cg03334076 | 18.77  | 6.85  | 6.18E-03 | 28.25  | 16.01 | 7.76E-02 | 13.33   | 22.86  | 5.60E-01 | 18.49  | 8.54  | 3.04E-02 | 5.85    | 23.80 | 8.06E-01 |
| cg07092157 | -14.61 | 5.33  | 6.18E-03 | -10.88 | 12.99 | 4.02E-01 | 13.93   | 22.51  | 5.36E-01 | -18.48 | 6.45  | 4.16E-03 | -9.98   | 17.72 | 5.73E-01 |
| cg24234141 | 18.49  | 6.75  | 6.18E-03 | 10.01  | 13.98 | 4.74E-01 | 16.12   | 33.34  | 6.29E-01 | 22.28  | 8.31  | 7.36E-03 | 12.03   | 26.31 | 6.48E-01 |
| cg11235498 | 17.33  | 6.33  | 6.18E-03 | 22.85  | 13.65 | 9.42E-02 | 5.00    | 17.24  | 7.72E-01 | 17.10  | 11.45 | 1.35E-01 | 18.92   | 10.78 | 7.93E-02 |
| cg24570346 | 24.20  | 8.84  | 6.18E-03 | 32.07  | 17.65 | 6.91E-02 | 45.67   | 41.15  | 2.67E-01 | 18.78  | 11.59 | 1.05E-01 | 25.74   | 25.36 | 3.10E-01 |
| cg05898482 | -15.58 | 5.69  | 6.19E-03 | -13.47 | 11.56 | 2.44E-01 | -16.21  | 28.96  | 5.76E-01 | -17.24 | 7.55  | 2.24E-02 | -12.59  | 14.68 | 3.91E-01 |
| cg26305174 | 9.59   | 3.50  | 6.20E-03 | 8.64   | 4.81  | 7.23E-02 | 13.08   | 7.59   | 8.48E-02 | 15.49  | 10.20 | 1.29E-01 | 2.81    | 9.42  | 7.66E-01 |
| cg06128688 | 20.28  | 7.41  | 6.20E-03 | 14.96  | 14.01 | 2.86E-01 | 91.73   | 44.36  | 3.86E-02 | 15.52  | 7.87  | 4.87E-02 | 30.96   | 16.28 | 5.73E-02 |
| cg13571700 | -18.46 | 6.74  | 6.20E-03 | -11.31 | 13.63 | 4.07E-01 | -2.65   | 26.17  | 9.19E-01 | -20.06 | 9.11  | 2.77E-02 | -32.04  | 17.94 | 7.40E-02 |
| cg24902842 | 16.52  | 6.04  | 6.20E-03 | 21.43  | 8.35  | 1.03E-02 | 19.00   | 13.38  | 1.56E-01 | -8.87  | 19.23 | 6.45E-01 | 13.32   | 14.42 | 3.56E-01 |
| cg00986053 | 20.68  | 7.55  | 6.20E-03 | 19.39  | 16.36 | 2.36E-01 | 14.21   | 30.49  | 6.41E-01 | 21.87  | 9.51  | 2.15E-02 | 19.82   | 24.59 | 4.20E-01 |
| cg23936587 | 23.12  | 8.45  | 6.21E-03 | 31.40  | 23.99 | 1.91E-01 | -30.29  | 50.90  | 5.52E-01 | 22.52  | 9.64  | 1.96E-02 | 34.24   | 29.62 | 2.48E-01 |
| cg02295678 | 38.20  | 13.96 | 6.21E-03 | -3.59  | 46.01 | 9.38E-01 | -124.75 | 155.98 | 4.24E-01 | 43.42  | 15.27 | 4.48E-03 | 50.45   | 54.85 | 3.58E-01 |
| cg26596651 | 22.13  | 8.09  | 6.21E-03 | 5.01   | 18.85 | 7.91E-01 | 8.71    | 33.52  | 7.95E-01 | 29.55  | 9.85  | 2.69E-03 | 9.22    | 28.00 | 7.42E-01 |

|            |        |       |          |        |       |          |        |        |          |        |       |          |        |       |          |
|------------|--------|-------|----------|--------|-------|----------|--------|--------|----------|--------|-------|----------|--------|-------|----------|
| cg22222261 | 22.93  | 8.38  | 6.22E-03 | 14.30  | 18.69 | 4.44E-01 | 27.28  | 46.69  | 5.59E-01 | 22.38  | 10.05 | 2.60E-02 | 50.60  | 31.35 | 1.07E-01 |
| cg19515518 | -16.37 | 5.98  | 6.22E-03 | -25.72 | 16.13 | 1.11E-01 | -31.95 | 38.88  | 4.11E-01 | -14.72 | 7.05  | 3.67E-02 | -12.40 | 17.47 | 4.78E-01 |
| cg06774875 | 53.82  | 19.67 | 6.22E-03 | 50.60  | 25.48 | 4.71E-02 | 88.71  | 76.42  | 2.46E-01 | 75.72  | 60.68 | 2.12E-01 | 42.22  | 40.78 | 3.01E-01 |
| cg00114012 | 19.52  | 7.14  | 6.23E-03 | 18.68  | 11.75 | 1.12E-01 | 13.24  | 14.82  | 3.72E-01 | 23.19  | 14.40 | 1.07E-01 | 25.19  | 18.21 | 1.67E-01 |
| cg25573488 | -46.03 | 16.83 | 6.23E-03 | -26.79 | 38.39 | 4.85E-01 | 161.51 | 183.61 | 3.79E-01 | -57.03 | 19.87 | 4.10E-03 | -16.22 | 58.72 | 7.82E-01 |
| cg06754047 | -23.61 | 8.63  | 6.23E-03 | -23.64 | 9.07  | 9.11E-03 | -4.28  | 116.29 | 9.71E-01 | -28.77 | 90.95 | 7.52E-01 | -24.00 | 30.68 | 4.34E-01 |
| cg13508904 | -14.14 | 5.17  | 6.23E-03 | 0.95   | 16.70 | 9.55E-01 | 3.50   | 29.39  | 9.05E-01 | -14.38 | 5.77  | 1.27E-02 | -39.67 | 19.46 | 4.15E-02 |
| cg27354094 | -17.17 | 6.28  | 6.23E-03 | -27.74 | 11.11 | 1.26E-02 | -20.09 | 13.38  | 1.33E-01 | -5.99  | 11.97 | 6.17E-01 | -12.12 | 14.55 | 4.05E-01 |
| cg17513182 | 15.63  | 5.71  | 6.23E-03 | 9.69   | 10.78 | 3.68E-01 | 17.94  | 40.77  | 6.60E-01 | 17.56  | 7.17  | 1.43E-02 | 21.83  | 22.56 | 3.33E-01 |
| cg26860113 | 40.23  | 14.71 | 6.23E-03 | 53.07  | 45.53 | 2.44E-01 | -37.46 | 123.60 | 7.62E-01 | 33.73  | 16.37 | 3.94E-02 | 107.63 | 53.96 | 4.61E-02 |
| cg19601653 | -72.11 | 26.36 | 6.23E-03 | -71.00 | 36.43 | 5.13E-02 | 149.94 | 146.76 | 3.07E-01 | -83.82 | 67.85 | 2.17E-01 | -92.51 | 48.69 | 5.75E-02 |
| cg14507014 | -12.40 | 4.53  | 6.24E-03 | -19.51 | 6.74  | 3.78E-03 | -14.37 | 9.84   | 1.44E-01 | -0.52  | 7.71  | 9.47E-01 | -15.04 | 9.75  | 1.23E-01 |
| cg16710042 | 14.65  | 5.36  | 6.24E-03 | 16.00  | 6.74  | 1.77E-02 | 2.68   | 16.56  | 8.71E-01 | 22.24  | 26.17 | 3.96E-01 | 15.02  | 11.35 | 1.86E-01 |
| cg16792183 | -41.52 | 15.18 | 6.25E-03 | -49.96 | 19.11 | 8.93E-03 | 34.17  | 76.16  | 6.54E-01 | -35.54 | 46.22 | 4.42E-01 | -33.94 | 32.32 | 2.94E-01 |
| cg13660701 | 40.62  | 14.86 | 6.25E-03 | 30.60  | 20.15 | 1.29E-01 | 39.13  | 43.21  | 3.65E-01 | -1.02  | 76.77 | 9.89E-01 | 64.47  | 27.07 | 1.73E-02 |
| cg04267526 | 14.01  | 5.12  | 6.26E-03 | 23.43  | 8.30  | 4.75E-03 | 0.55   | 14.29  | 9.69E-01 | 13.79  | 9.81  | 1.60E-01 | 5.74   | 10.98 | 6.01E-01 |
| cg04575202 | 10.39  | 3.80  | 6.27E-03 | 16.85  | 6.07  | 5.50E-03 | 11.57  | 8.37   | 1.67E-01 | -0.32  | 10.16 | 9.75E-01 | 5.50   | 7.43  | 4.59E-01 |
| cg04452195 | 5.77   | 2.11  | 6.28E-03 | 5.26   | 3.02  | 8.11E-02 | 12.22  | 4.95   | 1.36E-02 | 2.76   | 4.38  | 5.29E-01 | 3.44   | 6.86  | 6.16E-01 |
| cg18348736 | 22.13  | 8.10  | 6.28E-03 | 28.36  | 9.58  | 3.07E-03 | -22.14 | 37.31  | 5.53E-01 | 30.11  | 46.73 | 5.19E-01 | 9.60   | 17.76 | 5.89E-01 |
| cg23263911 | -48.61 | 17.79 | 6.28E-03 | -50.86 | 21.73 | 1.93E-02 | 48.34  | 86.10  | 5.74E-01 | -52.27 | 49.90 | 2.95E-01 | -62.14 | 44.45 | 1.62E-01 |
| cg01112965 | 40.86  | 14.95 | 6.28E-03 | 42.76  | 18.16 | 1.85E-02 | 52.30  | 71.19  | 4.63E-01 | 64.08  | 58.53 | 2.74E-01 | 25.30  | 32.43 | 4.35E-01 |
| cg00916179 | -20.82 | 7.62  | 6.30E-03 | -19.03 | 12.97 | 1.42E-01 | -11.71 | 14.99  | 4.35E-01 | -7.91  | 18.67 | 6.72E-01 | -43.06 | 15.89 | 6.72E-03 |
| cg09322899 | -26.96 | 9.87  | 6.30E-03 | -5.14  | 21.51 | 8.11E-01 | -23.71 | 51.88  | 6.48E-01 | -34.10 | 12.22 | 5.27E-03 | -27.48 | 30.96 | 3.75E-01 |
| cg22905292 | -19.50 | 7.14  | 6.30E-03 | -46.73 | 18.94 | 1.36E-02 | 1.63   | 37.89  | 9.66E-01 | -15.00 | 8.24  | 6.86E-02 | -23.15 | 26.67 | 3.85E-01 |
| cg02288341 | 50.53  | 18.50 | 6.30E-03 | 50.39  | 24.59 | 4.04E-02 | 92.23  | 78.05  | 2.37E-01 | 71.84  | 54.42 | 1.87E-01 | 32.51  | 36.13 | 3.68E-01 |
| cg10884975 | -27.71 | 10.15 | 6.30E-03 | -17.17 | 13.95 | 2.18E-01 | -69.63 | 28.68  | 1.52E-02 | -16.25 | 29.15 | 5.77E-01 | -35.35 | 21.39 | 9.84E-02 |
| cg01350996 | 12.83  | 4.70  | 6.31E-03 | 13.39  | 7.78  | 8.54E-02 | 15.02  | 8.90   | 9.15E-02 | 14.17  | 9.96  | 1.55E-01 | 4.59   | 12.81 | 7.20E-01 |
| cg27312338 | 12.36  | 4.53  | 6.31E-03 | 12.97  | 7.36  | 7.82E-02 | 20.90  | 8.98   | 2.00E-02 | 0.16   | 14.49 | 9.91E-01 | 7.91   | 8.71  | 3.64E-01 |
| cg19695404 | 20.11  | 7.36  | 6.31E-03 | 8.37   | 14.60 | 5.67E-01 | -4.45  | 38.44  | 9.08E-01 | 21.87  | 9.76  | 2.50E-02 | 40.78  | 19.71 | 3.85E-02 |
| cg05230834 | 19.15  | 7.01  | 6.31E-03 | 22.18  | 10.30 | 3.13E-02 | 19.20  | 17.14  | 2.63E-01 | -2.81  | 26.29 | 9.15E-01 | 19.66  | 12.84 | 1.26E-01 |
| cg04939496 | 10.27  | 3.76  | 6.32E-03 | 18.34  | 7.54  | 1.50E-02 | 10.11  | 9.79   | 3.01E-01 | 6.81   | 5.20  | 1.90E-01 | 8.07   | 13.15 | 5.39E-01 |
| cg10632093 | 14.28  | 5.23  | 6.32E-03 | 10.67  | 10.71 | 3.19E-01 | 6.70   | 13.65  | 6.24E-01 | 16.68  | 7.78  | 3.20E-02 | 19.72  | 12.96 | 1.28E-01 |
| cg06685950 | 16.17  | 5.92  | 6.32E-03 | 10.08  | 13.31 | 4.49E-01 | -0.57  | 22.12  | 9.79E-01 | 18.90  | 7.31  | 9.67E-03 | 24.36  | 21.79 | 2.64E-01 |
| cg16792312 | -26.33 | 9.64  | 6.32E-03 | -16.93 | 16.46 | 3.03E-01 | -15.27 | 23.68  | 5.19E-01 | -34.86 | 20.15 | 8.37E-02 | -38.19 | 18.84 | 4.27E-02 |
| cg02731042 | 30.80  | 11.28 | 6.32E-03 | 12.16  | 39.39 | 7.58E-01 | 85.05  | 141.31 | 5.47E-01 | 32.03  | 12.31 | 9.26E-03 | 32.97  | 42.25 | 4.35E-01 |

|            |        |       |          |        |       |          |         |        |          |        |       |          |        |       |          |
|------------|--------|-------|----------|--------|-------|----------|---------|--------|----------|--------|-------|----------|--------|-------|----------|
| cg07121640 | -39.49 | 14.46 | 6.33E-03 | -14.26 | 32.31 | 6.59E-01 | -220.36 | 169.13 | 1.93E-01 | -43.07 | 17.60 | 1.44E-02 | -50.73 | 42.27 | 2.30E-01 |
| cg09717927 | 11.98  | 4.39  | 6.33E-03 | 23.04  | 5.54  | 3.17E-05 | 10.91   | 6.54   | 9.52E-02 | 8.95   | 6.34  | 1.58E-01 | 3.37   | 6.41  | 5.99E-01 |
| cg22054793 | -13.25 | 4.85  | 6.33E-03 | -20.76 | 10.83 | 5.51E-02 | -12.09  | 19.73  | 5.40E-01 | -14.10 | 6.11  | 2.10E-02 | 5.18   | 14.83 | 7.27E-01 |
| cg05997801 | 23.82  | 8.73  | 6.33E-03 | 39.54  | 17.75 | 2.59E-02 | 22.88   | 15.70  | 1.45E-01 | 22.09  | 15.99 | 1.67E-01 | 4.08   | 22.42 | 8.56E-01 |
| cg14479709 | -14.97 | 5.48  | 6.33E-03 | -6.49  | 9.64  | 5.01E-01 | -4.98   | 13.58  | 7.14E-01 | -20.45 | 9.38  | 2.91E-02 | -29.51 | 13.24 | 2.58E-02 |
| cg24777950 | 7.20   | 2.64  | 6.33E-03 | 6.27   | 3.45  | 6.93E-02 | 11.03   | 6.74   | 1.02E-01 | 12.20  | 6.82  | 7.36E-02 | 0.25   | 7.82  | 9.75E-01 |
| cg00987918 | -12.89 | 4.72  | 6.34E-03 | -15.11 | 7.15  | 3.47E-02 | -18.82  | 11.09  | 8.99E-02 | -4.61  | 12.28 | 7.08E-01 | -9.43  | 9.73  | 3.32E-01 |
| cg11702351 | -19.14 | 7.01  | 6.34E-03 | -26.98 | 13.15 | 4.02E-02 | -28.22  | 20.18  | 1.62E-01 | -16.67 | 10.22 | 1.03E-01 | -1.76  | 19.86 | 9.29E-01 |
| cg02901861 | 27.50  | 10.08 | 6.34E-03 | 45.26  | 23.33 | 5.24E-02 | 14.73   | 71.58  | 8.37E-01 | 23.02  | 12.11 | 5.72E-02 | 27.99  | 31.68 | 3.77E-01 |
| cg01248080 | 28.67  | 10.50 | 6.34E-03 | 70.81  | 34.86 | 4.22E-02 | -37.52  | 125.23 | 7.65E-01 | 26.84  | 11.57 | 2.04E-02 | 4.97   | 37.60 | 8.95E-01 |
| cg15848350 | 18.38  | 6.73  | 6.34E-03 | 21.22  | 9.61  | 2.73E-02 | 32.57   | 16.11  | 4.32E-02 | 22.90  | 18.22 | 2.09E-01 | -2.88  | 14.67 | 8.44E-01 |
| cg23597562 | 23.60  | 8.65  | 6.34E-03 | 22.39  | 18.13 | 2.17E-01 | 4.64    | 33.94  | 8.91E-01 | 25.19  | 11.27 | 2.54E-02 | 28.38  | 25.06 | 2.57E-01 |
| cg23243463 | 19.61  | 7.18  | 6.35E-03 | 19.70  | 10.08 | 5.06E-02 | 24.09   | 27.48  | 3.81E-01 | 36.98  | 29.46 | 2.09E-01 | 15.79  | 11.91 | 1.85E-01 |
| cg24971846 | -22.09 | 8.09  | 6.35E-03 | -23.17 | 11.71 | 4.79E-02 | -43.54  | 29.89  | 1.45E-01 | -31.37 | 17.87 | 7.91E-02 | -5.72  | 16.38 | 7.27E-01 |
| cg12079362 | 32.37  | 11.86 | 6.35E-03 | 38.35  | 14.42 | 7.82E-03 | -20.44  | 51.36  | 6.91E-01 | -6.27  | 66.60 | 9.25E-01 | 32.35  | 24.30 | 1.83E-01 |
| cg23679333 | -21.35 | 7.82  | 6.35E-03 | -17.62 | 19.95 | 3.77E-01 | -6.38   | 57.14  | 9.11E-01 | -18.99 | 9.22  | 3.94E-02 | -45.24 | 23.91 | 5.85E-02 |
| cg16715162 | 29.01  | 10.63 | 6.36E-03 | 34.28  | 39.14 | 3.81E-01 | 111.41  | 150.42 | 4.59E-01 | 27.94  | 11.39 | 1.41E-02 | 31.62  | 47.62 | 5.07E-01 |
| cg03459809 | -13.23 | 4.85  | 6.36E-03 | -11.31 | 9.05  | 2.11E-01 | -4.67   | 12.20  | 7.02E-01 | -16.73 | 8.11  | 3.90E-02 | -16.53 | 10.92 | 1.30E-01 |
| cg24932241 | -21.25 | 7.79  | 6.36E-03 | -25.33 | 10.93 | 2.05E-02 | -28.13  | 20.91  | 1.78E-01 | -13.64 | 22.25 | 5.40E-01 | -12.19 | 16.20 | 4.52E-01 |
| cg01899540 | 15.09  | 5.53  | 6.36E-03 | 20.93  | 17.36 | 2.28E-01 | 35.11   | 25.87  | 1.75E-01 | 14.00  | 6.18  | 2.35E-02 | 2.93   | 24.29 | 9.04E-01 |
| cg12529301 | 45.98  | 16.86 | 6.38E-03 | 51.02  | 53.62 | 3.41E-01 | 169.01  | 202.11 | 4.03E-01 | 45.70  | 18.66 | 1.43E-02 | 31.64  | 60.11 | 5.99E-01 |
| cg03728296 | 11.51  | 4.22  | 6.38E-03 | 10.93  | 7.20  | 1.29E-01 | 13.52   | 8.78   | 1.23E-01 | 3.65   | 9.28  | 6.94E-01 | 17.69  | 9.01  | 4.97E-02 |
| cg15812469 | 16.95  | 6.22  | 6.38E-03 | 13.39  | 7.68  | 8.13E-02 | 7.57    | 19.10  | 6.92E-01 | 25.51  | 22.29 | 2.52E-01 | 33.41  | 15.46 | 3.07E-02 |
| cg24556026 | 12.32  | 4.52  | 6.39E-03 | 13.60  | 6.77  | 4.46E-02 | 18.97   | 8.64   | 2.81E-02 | 7.06   | 13.49 | 6.01E-01 | 1.73   | 10.96 | 8.75E-01 |
| cg04995978 | -42.80 | 15.70 | 6.39E-03 | -41.84 | 25.44 | 1.00E-01 | 24.64   | 47.62  | 6.05E-01 | -59.00 | 27.26 | 3.04E-02 | -55.77 | 37.08 | 1.33E-01 |
| cg05848579 | -18.05 | 6.62  | 6.39E-03 | -14.70 | 9.24  | 1.11E-01 | 3.02    | 21.60  | 8.89E-01 | -29.19 | 16.26 | 7.26E-02 | -26.22 | 13.90 | 5.93E-02 |
| cg04718050 | -12.96 | 4.75  | 6.39E-03 | -9.70  | 6.69  | 1.47E-01 | -22.90  | 13.57  | 9.16E-02 | -8.27  | 10.64 | 4.37E-01 | -20.77 | 11.40 | 6.84E-02 |
| cg04373948 | -9.04  | 3.31  | 6.40E-03 | -13.54 | 6.39  | 3.42E-02 | -5.60   | 11.93  | 6.39E-01 | -8.61  | 4.54  | 5.80E-02 | -3.12  | 9.52  | 7.43E-01 |
| cg23197628 | -25.20 | 9.24  | 6.40E-03 | -29.84 | 13.50 | 2.71E-02 | -4.00   | 26.24  | 8.79E-01 | -10.74 | 25.39 | 6.72E-01 | -33.87 | 17.64 | 5.48E-02 |
| cg07781399 | 20.84  | 7.64  | 6.40E-03 | 20.14  | 10.45 | 5.40E-02 | 5.18    | 19.94  | 7.95E-01 | 19.31  | 30.46 | 5.26E-01 | 31.68  | 15.12 | 3.62E-02 |
| cg05617732 | -15.85 | 5.82  | 6.40E-03 | -13.68 | 11.34 | 2.28E-01 | -4.54   | 15.36  | 7.68E-01 | -19.62 | 8.81  | 2.60E-02 | -19.34 | 14.62 | 1.86E-01 |
| cg16977270 | -12.10 | 4.44  | 6.41E-03 | -11.58 | 9.09  | 2.03E-01 | -7.75   | 8.17   | 3.43E-01 | -19.96 | 13.49 | 1.39E-01 | -13.65 | 7.41  | 6.56E-02 |
| cg15386434 | -6.39  | 2.35  | 6.41E-03 | -7.93  | 3.74  | 3.39E-02 | -0.59   | 4.48   | 8.95E-01 | -6.41  | 5.82  | 2.71E-01 | -12.24 | 5.71  | 3.20E-02 |
| cg10974128 | -9.79  | 3.59  | 6.41E-03 | -14.79 | 5.32  | 5.47E-03 | -9.76   | 9.57   | 3.08E-01 | -6.57  | 8.87  | 4.59E-01 | -2.53  | 7.32  | 7.29E-01 |
| cg14250984 | 17.93  | 6.58  | 6.41E-03 | 18.92  | 9.65  | 5.00E-02 | 29.75   | 13.83  | 3.15E-02 | 17.02  | 16.62 | 3.06E-01 | -1.57  | 16.79 | 9.26E-01 |

|            |        |       |          |        |       |          |        |        |          |        |       |          |         |       |          |
|------------|--------|-------|----------|--------|-------|----------|--------|--------|----------|--------|-------|----------|---------|-------|----------|
| cg16874494 | -64.47 | 23.65 | 6.42E-03 | -41.37 | 33.60 | 2.18E-01 | 43.13  | 112.37 | 7.01E-01 | -92.65 | 46.62 | 4.69E-02 | -108.60 | 52.50 | 3.86E-02 |
| cg09889987 | 21.94  | 8.05  | 6.42E-03 | 42.27  | 21.80 | 5.25E-02 | -18.14 | 41.15  | 6.59E-01 | 19.88  | 9.32  | 3.28E-02 | 25.76   | 28.68 | 3.69E-01 |
| cg09166022 | 22.79  | 8.36  | 6.42E-03 | 43.68  | 20.68 | 3.47E-02 | 69.87  | 85.16  | 4.12E-01 | 17.35  | 9.59  | 7.05E-02 | 26.72   | 32.28 | 4.08E-01 |
| cg13137533 | -24.59 | 9.02  | 6.42E-03 | -35.43 | 19.72 | 7.24E-02 | -50.95 | 30.76  | 9.76E-02 | -23.83 | 10.07 | 1.80E-02 | 19.78   | 30.22 | 5.13E-01 |
| cg16686396 | 9.81   | 3.60  | 6.42E-03 | 13.64  | 5.06  | 7.01E-03 | 8.85   | 7.25   | 2.22E-01 | 2.41   | 14.89 | 8.71E-01 | 3.08    | 8.29  | 7.10E-01 |
| cg23066159 | -9.20  | 3.38  | 6.42E-03 | -11.79 | 5.98  | 4.85E-02 | 0.20   | 8.47   | 9.81E-01 | -8.05  | 6.15  | 1.90E-01 | -13.81  | 7.19  | 5.50E-02 |
| cg07979652 | 12.06  | 4.42  | 6.43E-03 | 6.65   | 8.04  | 4.08E-01 | 7.68   | 11.73  | 5.13E-01 | 17.72  | 7.02  | 1.16E-02 | 12.10   | 11.13 | 2.77E-01 |
| cg06046705 | 27.57  | 10.12 | 6.43E-03 | 28.20  | 12.39 | 2.29E-02 | 38.87  | 32.20  | 2.27E-01 | 36.77  | 41.05 | 3.70E-01 | 15.55   | 24.24 | 5.21E-01 |
| cg15541401 | 23.59  | 8.66  | 6.44E-03 | 38.00  | 18.67 | 4.18E-02 | 27.26  | 17.66  | 1.23E-01 | 16.89  | 13.13 | 1.98E-01 | 13.86   | 26.16 | 5.96E-01 |
| cg12892303 | 17.09  | 6.27  | 6.44E-03 | 26.05  | 13.54 | 5.43E-02 | 8.78   | 12.98  | 4.99E-01 | 17.96  | 10.79 | 9.60E-02 | 15.81   | 13.59 | 2.45E-01 |
| cg18516150 | -10.13 | 3.72  | 6.44E-03 | -18.63 | 8.98  | 3.81E-02 | -6.70  | 14.42  | 6.42E-01 | -7.70  | 4.63  | 9.63E-02 | -13.06  | 10.89 | 2.30E-01 |
| cg06993955 | 14.37  | 5.27  | 6.44E-03 | 19.58  | 7.79  | 1.19E-02 | 4.71   | 11.61  | 6.85E-01 | 17.93  | 12.31 | 1.45E-01 | 7.42    | 13.56 | 5.84E-01 |
| cg26596307 | -17.03 | 6.25  | 6.44E-03 | -22.26 | 9.16  | 1.50E-02 | -6.41  | 13.40  | 6.32E-01 | -11.68 | 17.26 | 4.99E-01 | -20.12  | 14.52 | 1.66E-01 |
| cg06978288 | 15.60  | 5.73  | 6.44E-03 | 15.36  | 8.36  | 6.61E-02 | 23.10  | 12.73  | 6.95E-02 | 6.07   | 14.40 | 6.74E-01 | 16.20   | 13.89 | 2.43E-01 |
| cg00837860 | 26.97  | 9.90  | 6.44E-03 | 24.46  | 13.31 | 6.62E-02 | 57.52  | 40.87  | 1.59E-01 | -3.38  | 42.40 | 9.37E-01 | 30.71   | 17.13 | 7.30E-02 |
| cg16429063 | 23.88  | 8.77  | 6.45E-03 | 15.65  | 17.06 | 3.59E-01 | 35.35  | 19.17  | 6.51E-02 | 25.85  | 13.60 | 5.73E-02 | 14.46   | 26.30 | 5.82E-01 |
| cg00852783 | 17.66  | 6.48  | 6.46E-03 | 21.98  | 8.48  | 9.54E-03 | 37.22  | 36.27  | 3.05E-01 | -6.00  | 30.22 | 8.43E-01 | 11.55   | 11.16 | 3.01E-01 |
| cg20455001 | -12.52 | 4.60  | 6.46E-03 | -24.68 | 9.65  | 1.05E-02 | 3.53   | 19.84  | 8.59E-01 | -9.01  | 5.86  | 1.24E-01 | -14.97  | 14.21 | 2.92E-01 |
| cg04436634 | -10.06 | 3.69  | 6.46E-03 | -15.45 | 9.04  | 8.72E-02 | -1.03  | 17.44  | 9.53E-01 | -8.24  | 4.51  | 6.76E-02 | -16.28  | 10.81 | 1.32E-01 |
| cg09875921 | 18.36  | 6.74  | 6.46E-03 | 5.36   | 20.16 | 7.90E-01 | 20.28  | 26.79  | 4.49E-01 | 20.03  | 7.73  | 9.62E-03 | 19.36   | 26.41 | 4.63E-01 |
| cg00746693 | 20.39  | 7.49  | 6.46E-03 | 18.68  | 19.00 | 3.26E-01 | -51.80 | 79.02  | 5.12E-01 | 22.68  | 8.69  | 9.03E-03 | 11.90   | 24.53 | 6.28E-01 |
| cg06745695 | 21.07  | 7.74  | 6.46E-03 | 41.13  | 18.90 | 2.95E-02 | 21.73  | 79.01  | 7.83E-01 | 16.49  | 8.90  | 6.40E-02 | 22.42   | 29.78 | 4.52E-01 |
| cg23854488 | 9.05   | 3.32  | 6.47E-03 | 9.18   | 5.95  | 1.23E-01 | 13.16  | 7.55   | 8.13E-02 | 14.89  | 8.28  | 7.23E-02 | 3.71    | 5.76  | 5.19E-01 |
| cg07486732 | -13.84 | 5.08  | 6.47E-03 | -13.30 | 9.06  | 1.42E-01 | -13.91 | 15.27  | 3.62E-01 | -4.68  | 10.46 | 6.55E-01 | -20.70  | 8.73  | 1.78E-02 |
| cg05211662 | 18.20  | 6.69  | 6.47E-03 | 28.51  | 12.10 | 1.84E-02 | 16.85  | 19.70  | 3.92E-01 | 23.70  | 11.17 | 3.39E-02 | -1.04   | 13.23 | 9.38E-01 |
| cg01838965 | -9.93  | 3.65  | 6.48E-03 | -12.43 | 7.31  | 8.89E-02 | -6.72  | 12.41  | 5.88E-01 | -9.93  | 4.96  | 4.52E-02 | -7.12   | 10.40 | 4.94E-01 |
| cg26064870 | -12.93 | 4.75  | 6.48E-03 | 0.07   | 14.62 | 9.96E-01 | -2.82  | 19.18  | 8.83E-01 | -15.17 | 5.44  | 5.33E-03 | -16.95  | 17.72 | 3.39E-01 |
| cg27009439 | -11.26 | 4.14  | 6.49E-03 | -8.37  | 8.56  | 3.28E-01 | -1.97  | 15.66  | 9.00E-01 | -12.20 | 5.39  | 2.37E-02 | -18.39  | 12.59 | 1.44E-01 |
| cg02466113 | -53.45 | 19.64 | 6.49E-03 | -65.17 | 22.53 | 3.82E-03 | -99.38 | 50.42  | 4.87E-02 | -65.19 | 64.53 | 3.12E-01 | 2.50    | 36.89 | 9.46E-01 |
| cg23405575 | 16.32  | 5.99  | 6.49E-03 | 38.99  | 18.33 | 3.34E-02 | 33.56  | 35.26  | 3.41E-01 | 14.44  | 6.92  | 3.69E-02 | 3.03    | 17.76 | 8.64E-01 |
| cg09479341 | 17.29  | 6.35  | 6.50E-03 | 20.24  | 13.80 | 1.42E-01 | 17.37  | 17.78  | 3.29E-01 | 13.27  | 8.45  | 1.16E-01 | 34.46   | 20.59 | 9.43E-02 |
| cg25582295 | -22.06 | 8.11  | 6.50E-03 | -7.47  | 38.28 | 8.45E-01 | 49.99  | 172.37 | 7.72E-01 | -20.66 | 8.50  | 1.51E-02 | -70.14  | 38.93 | 7.16E-02 |
| cg21755257 | 57.36  | 21.08 | 6.50E-03 | 58.53  | 61.01 | 3.37E-01 | 10.76  | 281.70 | 9.70E-01 | 68.39  | 24.07 | 4.49E-03 | -19.75  | 64.10 | 7.58E-01 |
| cg18898336 | 23.19  | 8.52  | 6.50E-03 | 12.29  | 18.49 | 5.06E-01 | -6.34  | 21.75  | 7.71E-01 | 34.06  | 10.19 | 8.27E-04 | 27.69   | 22.13 | 2.11E-01 |
| cg07626482 | -16.77 | 6.16  | 6.51E-03 | -7.97  | 10.79 | 4.60E-01 | -20.99 | 17.02  | 2.18E-01 | -17.90 | 10.32 | 8.27E-02 | -27.08  | 14.30 | 5.83E-02 |

|                |        |       |          |        |       |          |         |        |          |        |       |          |        |       |          |
|----------------|--------|-------|----------|--------|-------|----------|---------|--------|----------|--------|-------|----------|--------|-------|----------|
| cg07895203     | -21.59 | 7.94  | 6.52E-03 | -35.58 | 17.37 | 4.05E-02 | -4.29   | 28.13  | 8.79E-01 | -14.38 | 10.17 | 1.57E-01 | -49.49 | 24.81 | 4.61E-02 |
| cg03466717     | 6.04   | 2.22  | 6.52E-03 | 6.51   | 3.04  | 3.20E-02 | 4.38    | 5.30   | 4.08E-01 | 6.44   | 7.11  | 3.65E-01 | 6.03   | 5.06  | 2.33E-01 |
| cg13287772     | 27.74  | 10.20 | 6.52E-03 | 39.50  | 21.03 | 6.03E-02 | 19.02   | 22.02  | 3.88E-01 | 18.99  | 16.19 | 2.41E-01 | 44.55  | 26.03 | 8.70E-02 |
| cg07715277     | 28.42  | 10.45 | 6.53E-03 | 54.86  | 22.49 | 1.47E-02 | 18.72   | 50.29  | 7.10E-01 | 23.80  | 13.34 | 7.42E-02 | 9.10   | 29.32 | 7.56E-01 |
| cg23259381     | -31.77 | 11.68 | 6.53E-03 | 17.15  | 33.43 | 6.08E-01 | -104.54 | 126.46 | 4.08E-01 | -39.42 | 13.14 | 2.71E-03 | -23.12 | 41.45 | 5.77E-01 |
| cg26841647     | 11.52  | 4.24  | 6.53E-03 | 13.33  | 9.03  | 1.40E-01 | 8.45    | 11.64  | 4.68E-01 | 13.92  | 5.80  | 1.64E-02 | 0.41   | 12.53 | 9.74E-01 |
| cg24055703     | -15.07 | 5.54  | 6.53E-03 | -14.63 | 9.16  | 1.10E-01 | -18.98  | 13.40  | 1.57E-01 | -22.54 | 12.16 | 6.39E-02 | -7.03  | 10.96 | 5.21E-01 |
| cg01062651     | 17.58  | 6.46  | 6.53E-03 | 22.25  | 17.36 | 2.00E-01 | 30.43   | 19.20  | 1.13E-01 | 14.82  | 7.80  | 5.75E-02 | 14.13  | 25.83 | 5.84E-01 |
| cg10608256     | 27.35  | 10.06 | 6.53E-03 | 10.48  | 32.94 | 7.50E-01 | 42.07   | 131.20 | 7.48E-01 | 31.22  | 10.95 | 4.36E-03 | -3.46  | 41.91 | 9.34E-01 |
| cg25308562     | -8.78  | 3.23  | 6.54E-03 | -7.00  | 5.99  | 2.43E-01 | -20.19  | 8.77   | 2.13E-02 | -7.01  | 4.98  | 1.59E-01 | -6.91  | 8.20  | 3.99E-01 |
| cg24964368     | 10.69  | 3.93  | 6.54E-03 | 8.68   | 5.27  | 9.94E-02 | 20.32   | 12.17  | 9.50E-02 | 14.51  | 10.71 | 1.75E-01 | 8.72   | 8.69  | 3.16E-01 |
| cg04475027     | 16.97  | 6.24  | 6.54E-03 | 32.50  | 16.97 | 5.56E-02 | -1.02   | 26.65  | 9.69E-01 | 16.33  | 8.08  | 4.34E-02 | 13.58  | 13.50 | 3.14E-01 |
| cg07096247     | -16.24 | 5.97  | 6.54E-03 | -39.66 | 18.53 | 3.24E-02 | -16.09  | 27.63  | 5.60E-01 | -11.58 | 6.79  | 8.81E-02 | -31.75 | 21.66 | 1.43E-01 |
| cg07800892     | -32.30 | 11.88 | 6.54E-03 | -22.44 | 21.85 | 3.05E-01 | -34.65  | 54.69  | 5.26E-01 | -42.37 | 15.93 | 7.83E-03 | -4.84  | 37.26 | 8.97E-01 |
| cg00021030     | 24.02  | 8.83  | 6.54E-03 | 19.00  | 16.55 | 2.51E-01 | 20.34   | 17.90  | 2.56E-01 | 19.49  | 16.11 | 2.26E-01 | 45.66  | 21.39 | 3.28E-02 |
| cg01389409     | 10.60  | 3.90  | 6.55E-03 | 10.69  | 5.10  | 3.62E-02 | 18.09   | 9.64   | 6.07E-02 | -0.55  | 12.91 | 9.66E-01 | 9.00   | 9.68  | 3.53E-01 |
| cg09602350     | -14.83 | 5.45  | 6.55E-03 | -16.21 | 11.04 | 1.42E-01 | -25.66  | 13.39  | 5.54E-02 | -13.44 | 8.55  | 1.16E-01 | -6.30  | 12.72 | 6.20E-01 |
| cg14571714     | 16.71  | 6.15  | 6.55E-03 | 12.74  | 15.60 | 4.14E-01 | -1.13   | 21.00  | 9.57E-01 | 22.10  | 7.53  | 3.35E-03 | 1.29   | 20.11 | 9.49E-01 |
| cg02124498     | -14.91 | 5.49  | 6.56E-03 | -12.76 | 13.97 | 3.61E-01 | -42.31  | 29.64  | 1.53E-01 | -11.28 | 6.51  | 8.34E-02 | -34.20 | 17.15 | 4.62E-02 |
| cg17894069     | 20.50  | 7.54  | 6.56E-03 | 28.46  | 11.33 | 1.20E-02 | 20.17   | 16.79  | 2.30E-01 | 16.51  | 15.78 | 2.95E-01 | 0.36   | 21.16 | 9.87E-01 |
| ch.9.26162534R | -40.44 | 14.88 | 6.56E-03 | -45.74 | 16.64 | 5.98E-03 | -22.19  | 77.50  | 7.75E-01 | 20.43  | 83.60 | 8.07E-01 | -28.07 | 40.97 | 4.93E-01 |
| cg18249991     | 53.10  | 19.54 | 6.57E-03 | 54.48  | 44.96 | 2.26E-01 | -263.66 | 248.93 | 2.90E-01 | 51.99  | 23.07 | 2.42E-02 | 81.39  | 65.90 | 2.17E-01 |
| cg07329769     | -50.50 | 18.58 | 6.58E-03 | -43.45 | 23.38 | 6.31E-02 | -85.96  | 64.19  | 1.81E-01 | -50.89 | 64.88 | 4.33E-01 | -57.66 | 41.32 | 1.63E-01 |
| cg02251799     | 33.00  | 12.15 | 6.58E-03 | 43.41  | 19.50 | 2.60E-02 | 96.83   | 68.60  | 1.58E-01 | 31.16  | 18.94 | 9.99E-02 | 1.81   | 29.52 | 9.51E-01 |
| cg19876838     | 24.77  | 9.12  | 6.59E-03 | 34.47  | 18.65 | 6.47E-02 | 17.29   | 18.72  | 3.55E-01 | 28.11  | 14.03 | 4.52E-02 | 5.60   | 28.60 | 8.45E-01 |
| cg04745004     | -9.71  | 3.57  | 6.59E-03 | -1.00  | 8.54  | 9.07E-01 | -21.49  | 13.24  | 1.05E-01 | -11.51 | 4.45  | 9.67E-03 | -5.06  | 10.97 | 6.45E-01 |
| cg03470736     | -67.86 | 24.98 | 6.60E-03 | -83.98 | 68.71 | 2.22E-01 | 124.27  | 183.08 | 4.97E-01 | -76.60 | 29.40 | 9.18E-03 | -29.72 | 69.95 | 6.71E-01 |
| cg18429196     | 15.04  | 5.54  | 6.60E-03 | 21.59  | 8.29  | 9.17E-03 | 18.87   | 13.32  | 1.57E-01 | 9.88   | 12.73 | 4.37E-01 | 1.40   | 12.65 | 9.12E-01 |
| cg23648082     | -15.06 | 5.54  | 6.60E-03 | -25.73 | 8.19  | 1.67E-03 | -4.87   | 10.64  | 6.47E-01 | -16.37 | 16.88 | 3.32E-01 | -6.60  | 11.23 | 5.57E-01 |
| cg19325793     | -8.28  | 3.05  | 6.60E-03 | -12.63 | 5.35  | 1.84E-02 | -10.51  | 8.29   | 2.05E-01 | -7.11  | 4.88  | 1.46E-01 | 0.02   | 7.84  | 9.98E-01 |
| cg11122009     | 7.69   | 2.83  | 6.61E-03 | 8.65   | 3.92  | 2.74E-02 | 8.36    | 5.85   | 1.53E-01 | 16.63  | 10.74 | 1.22E-01 | 0.39   | 6.77  | 9.54E-01 |
| cg09875213     | -14.82 | 5.46  | 6.61E-03 | -24.39 | 8.18  | 2.86E-03 | -8.17   | 12.86  | 5.25E-01 | -10.80 | 13.20 | 4.13E-01 | -3.17  | 12.07 | 7.93E-01 |
| cg09968630     | 19.02  | 7.00  | 6.61E-03 | 21.25  | 17.32 | 2.20E-01 | 126.26  | 73.18  | 8.45E-02 | 14.74  | 7.56  | 5.13E-02 | 35.66  | 21.17 | 9.21E-02 |
| cg24310460     | -40.23 | 14.81 | 6.61E-03 | -29.83 | 31.12 | 3.38E-01 | -131.90 | 228.69 | 5.64E-01 | -48.53 | 17.79 | 6.39E-03 | 9.29   | 53.61 | 8.62E-01 |
| cg18762620     | 37.10  | 13.66 | 6.61E-03 | 30.86  | 38.34 | 4.21E-01 | 166.43  | 191.37 | 3.84E-01 | 37.02  | 15.22 | 1.50E-02 | 40.22  | 54.56 | 4.61E-01 |

|            |        |       |          |        |       |          |         |        |          |        |       |          |         |       |          |
|------------|--------|-------|----------|--------|-------|----------|---------|--------|----------|--------|-------|----------|---------|-------|----------|
| cg19189176 | -14.65 | 5.39  | 6.62E-03 | -18.38 | 9.63  | 5.63E-02 | -2.23   | 9.96   | 8.23E-01 | -15.99 | 14.67 | 2.76E-01 | -23.53  | 10.63 | 2.68E-02 |
| cg10775230 | 21.92  | 8.07  | 6.63E-03 | 22.09  | 11.05 | 4.57E-02 | 46.53   | 17.78  | 8.88E-03 | 9.34   | 23.10 | 6.86E-01 | 4.99    | 17.50 | 7.76E-01 |
| cg26993848 | 13.71  | 5.05  | 6.63E-03 | 15.79  | 7.62  | 3.84E-02 | 17.77   | 11.61  | 1.26E-01 | 18.57  | 12.85 | 1.48E-01 | 2.54    | 10.82 | 8.14E-01 |
| cg14102186 | -10.47 | 3.86  | 6.63E-03 | -22.57 | 10.91 | 3.85E-02 | -17.63  | 25.69  | 4.93E-01 | -9.30  | 4.43  | 3.59E-02 | -2.18   | 12.51 | 8.62E-01 |
| cg22304662 | 18.81  | 6.93  | 6.64E-03 | 14.46  | 11.40 | 2.05E-01 | 27.00   | 13.03  | 3.82E-02 | 12.73  | 15.09 | 3.99E-01 | 22.94   | 18.68 | 2.20E-01 |
| cg02758272 | -30.28 | 11.16 | 6.64E-03 | -26.11 | 17.20 | 1.29E-01 | -40.09  | 31.61  | 2.05E-01 | -27.45 | 23.75 | 2.48E-01 | -35.23  | 23.04 | 1.26E-01 |
| cg02106116 | -18.42 | 6.78  | 6.64E-03 | -30.10 | 12.51 | 1.61E-02 | -5.09   | 16.19  | 7.53E-01 | -11.36 | 8.07  | 1.59E-01 | -39.24  | 18.43 | 3.33E-02 |
| cg15002294 | 21.87  | 8.06  | 6.64E-03 | 25.44  | 10.45 | 1.49E-02 | 3.84    | 21.25  | 8.57E-01 | 21.88  | 33.12 | 5.09E-01 | 24.20   | 17.90 | 1.76E-01 |
| cg09690103 | -8.87  | 3.27  | 6.64E-03 | -13.09 | 6.30  | 3.77E-02 | -5.01   | 8.61   | 5.61E-01 | -8.06  | 4.85  | 9.64E-02 | -7.25   | 8.92  | 4.17E-01 |
| cg15269394 | 10.75  | 3.96  | 6.64E-03 | 12.53  | 6.23  | 4.42E-02 | 20.63   | 8.94   | 2.10E-02 | 5.78   | 7.63  | 4.49E-01 | 0.50    | 11.06 | 9.64E-01 |
| cg23598352 | 8.28   | 3.05  | 6.65E-03 | 9.42   | 5.83  | 1.06E-01 | 15.39   | 9.30   | 9.80E-02 | 6.66   | 4.12  | 1.06E-01 | 5.66    | 11.59 | 6.25E-01 |
| cg08596817 | 20.96  | 7.72  | 6.66E-03 | 25.72  | 10.05 | 1.05E-02 | 27.82   | 38.95  | 4.75E-01 | 48.57  | 36.60 | 1.85E-01 | 7.72    | 13.54 | 5.69E-01 |
| cg13311890 | 12.81  | 4.72  | 6.66E-03 | 17.55  | 7.62  | 2.13E-02 | 15.46   | 9.56   | 1.06E-01 | 8.13   | 11.07 | 4.63E-01 | 4.32    | 10.81 | 6.90E-01 |
| cg24491328 | 24.70  | 9.10  | 6.66E-03 | 27.82  | 23.55 | 2.38E-01 | 70.81   | 52.79  | 1.80E-01 | 22.72  | 10.49 | 3.04E-02 | 19.64   | 34.77 | 5.72E-01 |
| cg08657020 | 71.78  | 26.45 | 6.66E-03 | 77.04  | 31.80 | 1.54E-02 | -71.43  | 150.54 | 6.35E-01 | 85.32  | 91.73 | 3.52E-01 | 70.00   | 60.08 | 2.44E-01 |
| cg09980058 | 13.70  | 5.05  | 6.66E-03 | 21.77  | 10.43 | 3.68E-02 | 2.29    | 14.31  | 8.73E-01 | 17.47  | 8.69  | 4.44E-02 | 7.94    | 9.16  | 3.86E-01 |
| cg08221272 | 22.77  | 8.39  | 6.66E-03 | 18.96  | 21.38 | 3.75E-01 | 9.72    | 46.99  | 8.36E-01 | 20.93  | 9.90  | 3.46E-02 | 46.95   | 27.08 | 8.29E-02 |
| cg03918530 | 18.08  | 6.67  | 6.67E-03 | 24.69  | 11.53 | 3.22E-02 | 19.39   | 13.76  | 1.59E-01 | 15.35  | 13.45 | 2.54E-01 | 8.13    | 15.49 | 5.99E-01 |
| cg02467646 | -29.73 | 10.96 | 6.67E-03 | 1.41   | 26.69 | 9.58E-01 | -1.13   | 94.76  | 9.90E-01 | -36.66 | 13.14 | 5.28E-03 | -36.33  | 31.26 | 2.45E-01 |
| cg10047041 | -11.45 | 4.22  | 6.68E-03 | -15.07 | 8.17  | 6.52E-02 | -6.88   | 10.18  | 4.99E-01 | -10.26 | 6.60  | 1.20E-01 | -13.48  | 10.81 | 2.13E-01 |
| cg11746651 | -21.20 | 7.82  | 6.68E-03 | -32.47 | 10.07 | 1.26E-03 | -0.26   | 13.16  | 9.84E-01 | -13.25 | 15.22 | 3.84E-01 | -31.68  | 11.83 | 7.39E-03 |
| cg19559621 | 25.09  | 9.25  | 6.68E-03 | 12.86  | 27.21 | 6.37E-01 | 29.59   | 124.21 | 8.12E-01 | 25.20  | 10.13 | 1.29E-02 | 53.51   | 43.39 | 2.18E-01 |
| cg12652953 | 20.43  | 7.53  | 6.68E-03 | 13.44  | 14.31 | 3.48E-01 | 34.36   | 19.67  | 8.07E-02 | 22.12  | 10.93 | 4.31E-02 | 11.52   | 23.58 | 6.25E-01 |
| cg10055431 | -19.23 | 7.09  | 6.68E-03 | -0.92  | 21.29 | 9.65E-01 | -42.14  | 28.36  | 1.37E-01 | -19.69 | 8.10  | 1.51E-02 | -23.13  | 28.59 | 4.19E-01 |
| cg11152384 | -16.54 | 6.10  | 6.68E-03 | -18.25 | 7.80  | 1.94E-02 | -15.97  | 14.46  | 2.70E-01 | -3.05  | 31.89 | 9.24E-01 | -13.99  | 14.59 | 3.38E-01 |
| cg04361551 | 27.78  | 10.24 | 6.69E-03 | 20.41  | 21.27 | 3.37E-01 | 23.46   | 54.32  | 6.66E-01 | 25.98  | 13.51 | 5.44E-02 | 46.29   | 25.86 | 7.34E-02 |
| cg01978105 | 13.55  | 5.00  | 6.69E-03 | 8.51   | 10.10 | 3.99E-01 | 33.37   | 40.51  | 4.10E-01 | 13.81  | 6.25  | 2.71E-02 | 21.21   | 15.77 | 1.79E-01 |
| cg24074448 | -16.93 | 6.24  | 6.69E-03 | -19.44 | 9.07  | 3.21E-02 | 2.89    | 14.40  | 8.41E-01 | -17.02 | 16.13 | 2.91E-01 | -30.30  | 14.38 | 3.51E-02 |
| cg22118017 | 17.37  | 6.41  | 6.69E-03 | 16.84  | 11.49 | 1.43E-01 | 10.45   | 16.20  | 5.19E-01 | 22.14  | 9.83  | 2.43E-02 | 10.18   | 19.49 | 6.01E-01 |
| cg06850852 | -66.59 | 24.56 | 6.70E-03 | -85.96 | 68.63 | 2.10E-01 | -193.90 | 247.51 | 4.33E-01 | -50.64 | 28.47 | 7.53E-02 | -135.38 | 71.44 | 5.81E-02 |
| cg00303335 | 15.78  | 5.82  | 6.70E-03 | 20.02  | 8.92  | 2.48E-02 | 1.86    | 14.38  | 8.97E-01 | 21.88  | 11.28 | 5.23E-02 | 7.78    | 15.38 | 6.13E-01 |
| cg04085713 | -14.08 | 5.19  | 6.70E-03 | -1.73  | 12.47 | 8.90E-01 | -14.24  | 13.32  | 2.85E-01 | -16.16 | 6.71  | 1.61E-02 | -25.68  | 18.89 | 1.74E-01 |
| cg23235277 | 32.70  | 12.06 | 6.70E-03 | 55.65  | 17.81 | 1.78E-03 | 26.62   | 22.92  | 2.45E-01 | 3.11   | 21.99 | 8.88E-01 | 37.48   | 28.59 | 1.90E-01 |
| cg04882584 | -22.68 | 8.36  | 6.70E-03 | -41.07 | 14.16 | 3.71E-03 | -9.63   | 26.29  | 7.14E-01 | -13.74 | 15.13 | 3.64E-01 | -12.96  | 16.93 | 4.44E-01 |
| cg07658771 | 8.78   | 3.24  | 6.70E-03 | 11.37  | 4.71  | 1.59E-02 | 6.69    | 6.61   | 3.11E-01 | 4.54   | 13.18 | 7.31E-01 | 6.74    | 6.79  | 3.21E-01 |



|            |        |       |          |        |       |          |         |        |          |        |        |          |        |       |          |
|------------|--------|-------|----------|--------|-------|----------|---------|--------|----------|--------|--------|----------|--------|-------|----------|
| cg07983888 | -25.73 | 9.49  | 6.71E-03 | -20.32 | 17.56 | 2.47E-01 | -19.22  | 18.43  | 2.97E-01 | -38.32 | 17.48  | 2.84E-02 | -23.03 | 24.68 | 3.51E-01 |
| cg11329853 | -10.39 | 3.83  | 6.71E-03 | -8.62  | 10.16 | 3.96E-01 | -34.41  | 16.31  | 3.49E-02 | -9.93  | 4.51   | 2.76E-02 | -1.13  | 13.53 | 9.34E-01 |
| cg20425384 | -42.81 | 15.79 | 6.71E-03 | -14.31 | 26.02 | 5.82E-01 | -137.76 | 291.26 | 6.36E-01 | -69.71 | 23.18  | 2.64E-03 | -29.04 | 38.91 | 4.55E-01 |
| cg10370850 | -26.19 | 9.66  | 6.72E-03 | -28.44 | 14.81 | 5.48E-02 | -12.76  | 21.00  | 5.43E-01 | -51.43 | 22.09  | 1.99E-02 | -9.00  | 23.35 | 7.00E-01 |
| cg07985589 | -11.33 | 4.18  | 6.72E-03 | -16.63 | 7.95  | 3.66E-02 | -3.15   | 12.50  | 8.01E-01 | -14.95 | 5.84   | 1.04E-02 | 3.00   | 10.50 | 7.75E-01 |
| cg18986218 | 19.27  | 7.11  | 6.72E-03 | 25.96  | 11.07 | 1.90E-02 | 22.38   | 20.33  | 2.71E-01 | 43.52  | 28.65  | 1.29E-01 | 7.78   | 11.20 | 4.87E-01 |
| cg22468894 | 19.69  | 7.26  | 6.73E-03 | 21.36  | 14.02 | 1.28E-01 | 8.47    | 15.45  | 5.83E-01 | 27.71  | 11.17  | 1.31E-02 | 4.15   | 24.51 | 8.65E-01 |
| cg15721134 | 6.51   | 2.40  | 6.73E-03 | 4.87   | 3.72  | 1.90E-01 | 6.18    | 5.26   | 2.40E-01 | 10.59  | 4.68   | 2.35E-02 | 3.57   | 7.17  | 6.18E-01 |
| cg25536373 | 15.33  | 5.66  | 6.73E-03 | 20.04  | 8.71  | 2.13E-02 | 4.98    | 12.42  | 6.89E-01 | 28.57  | 16.32  | 8.00E-02 | 9.61   | 11.32 | 3.96E-01 |
| cg13981078 | 22.18  | 8.19  | 6.74E-03 | 6.02   | 19.36 | 7.56E-01 | 45.40   | 35.06  | 1.95E-01 | 24.91  | 9.89   | 1.17E-02 | 19.10  | 28.77 | 5.07E-01 |
| cg12760869 | 16.49  | 6.09  | 6.74E-03 | 12.55  | 11.01 | 2.54E-01 | 10.50   | 16.12  | 5.15E-01 | 15.97  | 11.14  | 1.52E-01 | 25.25  | 12.10 | 3.69E-02 |
| cg06850687 | 10.91  | 4.03  | 6.75E-03 | 6.30   | 5.81  | 2.78E-01 | 22.03   | 9.61   | 2.19E-02 | 15.16  | 6.47   | 1.92E-02 | -0.14  | 11.03 | 9.90E-01 |
| cg03352346 | 25.90  | 9.56  | 6.75E-03 | 11.92  | 16.85 | 4.79E-01 | 31.90   | 18.85  | 9.05E-02 | 38.56  | 18.96  | 4.20E-02 | 24.36  | 23.45 | 2.99E-01 |
| cg00240178 | -9.10  | 3.36  | 6.75E-03 | -16.31 | 8.62  | 5.87E-02 | -22.08  | 13.67  | 1.06E-01 | -6.83  | 4.11   | 9.67E-02 | -6.09  | 9.65  | 5.28E-01 |
| cg02571055 | -8.98  | 3.32  | 6.75E-03 | -11.11 | 4.73  | 1.89E-02 | -8.16   | 9.45   | 3.88E-01 | -6.23  | 10.24  | 5.43E-01 | -6.65  | 6.25  | 2.87E-01 |
| cg20548765 | -81.95 | 30.25 | 6.75E-03 | -84.41 | 37.79 | 2.55E-02 | -182.45 | 145.02 | 2.08E-01 | 2.57   | 99.60  | 9.79E-01 | -90.21 | 64.00 | 1.59E-01 |
| cg24516259 | -17.73 | 6.55  | 6.76E-03 | -29.71 | 10.06 | 3.15E-03 | -20.43  | 21.72  | 3.47E-01 | -11.11 | 13.52  | 4.11E-01 | -2.76  | 13.05 | 8.33E-01 |
| cg00371702 | -11.31 | 4.17  | 6.76E-03 | -16.83 | 6.43  | 8.88E-03 | -4.92   | 10.15  | 6.28E-01 | -4.75  | 11.58  | 6.82E-01 | -9.90  | 7.89  | 2.10E-01 |
| cg21626573 | 24.46  | 9.03  | 6.76E-03 | 37.98  | 17.96 | 3.44E-02 | 11.40   | 15.98  | 4.76E-01 | 16.93  | 18.04  | 3.48E-01 | 39.36  | 21.46 | 6.67E-02 |
| cg07901253 | 18.40  | 6.79  | 6.77E-03 | 16.31  | 9.13  | 7.42E-02 | 23.84   | 19.05  | 2.11E-01 | 6.99   | 18.20  | 7.01E-01 | 29.80  | 16.01 | 6.26E-02 |
| cg24415688 | -12.24 | 4.52  | 6.77E-03 | -11.79 | 6.60  | 7.40E-02 | -19.04  | 9.69   | 4.94E-02 | -9.71  | 16.62  | 5.59E-01 | -7.72  | 9.25  | 4.04E-01 |
| cg15420692 | 33.70  | 12.45 | 6.78E-03 | 78.74  | 32.09 | 1.41E-02 | -66.00  | 95.55  | 4.90E-01 | 28.35  | 10.45  | 6.66E-03 | 28.47  | 38.60 | 4.61E-01 |
| cg16877606 | 50.74  | 18.74 | 6.78E-03 | 93.43  | 50.39 | 6.37E-02 | 8.00    | 245.49 | 9.74E-01 | 44.82  | 21.12  | 3.38E-02 | 36.09  | 71.79 | 6.15E-01 |
| cg21202522 | 21.56  | 7.96  | 6.79E-03 | 22.29  | 11.84 | 5.97E-02 | 20.91   | 15.24  | 1.70E-01 | 48.33  | 22.51  | 3.18E-02 | -1.87  | 20.59 | 9.28E-01 |
| cg01912040 | 9.55   | 3.53  | 6.79E-03 | 15.26  | 6.37  | 1.66E-02 | 10.60   | 8.17   | 1.94E-01 | 4.03   | 5.44   | 4.59E-01 | 13.96  | 12.04 | 2.46E-01 |
| cg02624460 | 16.14  | 5.96  | 6.79E-03 | 20.31  | 12.28 | 9.81E-02 | 8.59    | 17.03  | 6.14E-01 | 17.04  | 8.30   | 3.99E-02 | 11.95  | 16.85 | 4.78E-01 |
| cg14311485 | -28.87 | 10.66 | 6.79E-03 | -20.10 | 17.81 | 2.59E-01 | -42.85  | 46.25  | 3.54E-01 | -29.70 | 16.37  | 6.96E-02 | -41.37 | 26.34 | 1.16E-01 |
| cg24180219 | -21.75 | 8.04  | 6.79E-03 | -18.37 | 13.59 | 1.76E-01 | -24.52  | 15.32  | 1.10E-01 | -18.80 | 19.12  | 3.25E-01 | -26.53 | 18.05 | 1.42E-01 |
| cg23417096 | 21.42  | 7.91  | 6.79E-03 | 16.40  | 12.95 | 2.05E-01 | 32.16   | 16.44  | 5.04E-02 | 23.69  | 15.26  | 1.21E-01 | 11.71  | 22.27 | 5.99E-01 |
| cg04076387 | 9.61   | 3.55  | 6.80E-03 | 4.30   | 5.25  | 4.12E-01 | 10.95   | 7.85   | 1.63E-01 | 24.50  | 11.59  | 3.45E-02 | 12.69  | 7.18  | 7.71E-02 |
| cg15900034 | -11.92 | 4.40  | 6.80E-03 | -13.92 | 6.29  | 2.68E-02 | -11.05  | 11.42  | 3.33E-01 | -6.21  | 10.65  | 5.60E-01 | -12.56 | 10.11 | 2.14E-01 |
| cg01229873 | -46.07 | 17.02 | 6.80E-03 | -57.94 | 19.30 | 2.68E-03 | 64.94   | 125.14 | 6.04E-01 | -50.33 | 103.55 | 6.27E-01 | -4.74  | 40.51 | 9.07E-01 |
| cg08159743 | 23.59  | 8.72  | 6.81E-03 | 38.69  | 18.23 | 3.38E-02 | 13.09   | 44.96  | 7.71E-01 | 8.95   | 13.30  | 5.01E-01 | 34.20  | 15.80 | 3.04E-02 |
| cg02895319 | 31.47  | 11.63 | 6.81E-03 | 32.17  | 14.54 | 2.70E-02 | 51.41   | 33.92  | 1.30E-01 | 65.04  | 43.93  | 1.39E-01 | 1.68   | 27.99 | 9.52E-01 |
| cg20087303 | -31.37 | 11.59 | 6.81E-03 | -35.00 | 26.71 | 1.90E-01 | -116.95 | 91.70  | 2.02E-01 | -25.45 | 13.73  | 6.38E-02 | -57.70 | 40.34 | 1.53E-01 |

|            |        |       |          |        |       |          |         |        |          |        |       |          |         |       |          |
|------------|--------|-------|----------|--------|-------|----------|---------|--------|----------|--------|-------|----------|---------|-------|----------|
| cg22707397 | -6.88  | 2.54  | 6.81E-03 | -6.05  | 3.82  | 1.13E-01 | -4.64   | 7.55   | 5.39E-01 | -14.66 | 6.20  | 1.79E-02 | -4.37   | 4.85  | 3.67E-01 |
| cg14939082 | 11.65  | 4.31  | 6.82E-03 | 15.45  | 6.19  | 1.26E-02 | 10.76   | 11.09  | 3.32E-01 | 12.22  | 10.35 | 2.38E-01 | 2.28    | 9.81  | 8.16E-01 |
| cg13691209 | -13.97 | 5.16  | 6.82E-03 | -10.96 | 8.08  | 1.75E-01 | -14.05  | 11.62  | 2.27E-01 | -17.26 | 11.56 | 1.35E-01 | -16.82  | 11.70 | 1.50E-01 |
| cg12735838 | 13.91  | 5.14  | 6.82E-03 | 15.62  | 7.33  | 3.30E-02 | 26.37   | 11.92  | 2.70E-02 | 0.59   | 13.98 | 9.66E-01 | 6.63    | 11.89 | 5.77E-01 |
| cg18703515 | -15.20 | 5.62  | 6.82E-03 | -20.69 | 11.42 | 6.99E-02 | -12.68  | 14.63  | 3.86E-01 | -12.00 | 8.21  | 1.44E-01 | -19.07  | 14.96 | 2.02E-01 |
| cg15949830 | 19.16  | 7.08  | 6.82E-03 | 25.59  | 16.27 | 1.16E-01 | 17.80   | 37.99  | 6.39E-01 | 18.85  | 8.59  | 2.83E-02 | 9.21    | 22.77 | 6.86E-01 |
| cg02126603 | 40.22  | 14.87 | 6.83E-03 | 6.23   | 31.76 | 8.45E-01 | -9.79   | 55.55  | 8.60E-01 | 58.09  | 19.40 | 2.75E-03 | 44.60   | 42.65 | 2.96E-01 |
| cg23204612 | -22.58 | 8.35  | 6.83E-03 | -5.56  | 20.50 | 7.86E-01 | 15.98   | 38.36  | 6.77E-01 | -27.65 | 9.90  | 5.24E-03 | -36.20  | 30.17 | 2.30E-01 |
| cg18912107 | -11.53 | 4.26  | 6.84E-03 | -12.44 | 6.34  | 4.98E-02 | -12.24  | 10.04  | 2.23E-01 | -2.53  | 8.72  | 7.71E-01 | -24.05  | 11.88 | 4.29E-02 |
| cg00495443 | 10.05  | 3.72  | 6.84E-03 | 14.07  | 5.71  | 1.37E-02 | 8.03    | 7.33   | 2.73E-01 | -0.18  | 10.71 | 9.87E-01 | 10.27   | 8.33  | 2.18E-01 |
| cg02651400 | 28.24  | 10.44 | 6.84E-03 | 28.54  | 27.90 | 3.06E-01 | -18.75  | 47.67  | 6.94E-01 | 27.26  | 13.37 | 4.16E-02 | 42.09   | 23.20 | 6.96E-02 |
| cg07462279 | 15.96  | 5.90  | 6.85E-03 | 20.70  | 10.48 | 4.82E-02 | 15.98   | 14.16  | 2.59E-01 | 17.40  | 9.26  | 6.02E-02 | -4.28   | 18.35 | 8.15E-01 |
| cg01053766 | -43.84 | 16.22 | 6.86E-03 | -26.04 | 27.49 | 3.43E-01 | -92.99  | 51.76  | 7.24E-02 | -35.61 | 25.62 | 1.65E-01 | -74.33  | 41.42 | 7.28E-02 |
| cg07184807 | -7.63  | 2.82  | 6.86E-03 | -7.72  | 4.56  | 9.04E-02 | -4.49   | 6.28   | 4.74E-01 | -12.60 | 5.71  | 2.73E-02 | -4.02   | 6.84  | 5.57E-01 |
| cg22790142 | -48.05 | 17.77 | 6.86E-03 | -24.08 | 46.91 | 6.08E-01 | 68.91   | 232.80 | 7.67E-01 | -45.04 | 19.95 | 2.40E-02 | -162.50 | 74.49 | 2.91E-02 |
| cg07853743 | 36.49  | 13.50 | 6.86E-03 | 42.55  | 27.05 | 1.16E-01 | -37.05  | 91.34  | 6.85E-01 | 36.57  | 16.99 | 3.14E-02 | 36.98   | 43.11 | 3.91E-01 |
| cg15720043 | 23.03  | 8.52  | 6.86E-03 | 29.45  | 10.78 | 6.30E-03 | 0.73    | 38.80  | 9.85E-01 | 8.41   | 35.77 | 8.14E-01 | 15.25   | 16.37 | 3.51E-01 |
| cg01933251 | 34.47  | 12.75 | 6.87E-03 | 28.80  | 41.66 | 4.89E-01 | -69.03  | 135.15 | 6.10E-01 | 41.03  | 14.00 | 3.38E-03 | -24.73  | 49.11 | 6.15E-01 |
| cg00971827 | -12.51 | 4.63  | 6.87E-03 | -15.95 | 12.13 | 1.88E-01 | -35.50  | 21.07  | 9.20E-02 | -9.89  | 5.45  | 6.95E-02 | -15.88  | 15.97 | 3.20E-01 |
| cg00955307 | 12.46  | 4.61  | 6.88E-03 | 14.59  | 6.65  | 2.81E-02 | 19.17   | 9.56   | 4.51E-02 | 7.52   | 14.19 | 5.96E-01 | 1.10    | 10.81 | 9.19E-01 |
| cg17805199 | 16.52  | 6.11  | 6.88E-03 | 12.72  | 8.68  | 1.43E-01 | 27.54   | 12.22  | 2.43E-02 | 28.92  | 19.58 | 1.40E-01 | 3.25    | 15.42 | 8.33E-01 |
| cg20487152 | -15.15 | 5.60  | 6.88E-03 | -15.08 | 15.23 | 3.22E-01 | -23.43  | 19.10  | 2.20E-01 | -14.06 | 6.84  | 3.99E-02 | -15.39  | 17.08 | 3.68E-01 |
| cg11940663 | 34.91  | 12.92 | 6.88E-03 | -12.76 | 43.43 | 7.69E-01 | 44.27   | 131.36 | 7.36E-01 | 41.03  | 14.19 | 3.83E-03 | 21.96   | 47.74 | 6.46E-01 |
| cg15469655 | -15.01 | 5.56  | 6.88E-03 | -5.89  | 14.08 | 6.76E-01 | 1.48    | 17.97  | 9.35E-01 | -21.90 | 7.02  | 1.81E-03 | -4.29   | 15.87 | 7.87E-01 |
| cg26230245 | -57.42 | 21.25 | 6.89E-03 | -47.00 | 27.62 | 8.89E-02 | -115.06 | 60.57  | 5.75E-02 | -6.32  | 64.39 | 9.22E-01 | -83.70  | 50.59 | 9.80E-02 |
| cg23680049 | 62.23  | 23.03 | 6.89E-03 | 84.81  | 64.14 | 1.86E-01 | -96.01  | 247.48 | 6.98E-01 | 60.54  | 26.53 | 2.25E-02 | 59.84   | 69.77 | 3.91E-01 |
| cg17053591 | 24.44  | 9.04  | 6.89E-03 | 21.50  | 18.58 | 2.47E-01 | -0.67   | 37.93  | 9.86E-01 | 30.89  | 11.61 | 7.80E-03 | 6.43    | 28.69 | 8.23E-01 |
| cg08292483 | 13.80  | 5.11  | 6.89E-03 | 4.74   | 10.76 | 6.60E-01 | 25.18   | 10.23  | 1.39E-02 | 15.93  | 8.05  | 4.79E-02 | 0.39    | 14.55 | 9.79E-01 |
| cg13373343 | -13.81 | 5.11  | 6.89E-03 | -8.52  | 11.95 | 4.76E-01 | -8.80   | 31.02  | 7.77E-01 | -14.35 | 6.12  | 1.91E-02 | -21.60  | 16.75 | 1.97E-01 |
| cg03562868 | 8.08   | 2.99  | 6.90E-03 | 6.39   | 5.36  | 2.34E-01 | -0.65   | 8.02   | 9.36E-01 | 10.40  | 4.50  | 2.10E-02 | 14.54   | 9.00  | 1.06E-01 |
| cg15506894 | 10.98  | 4.06  | 6.90E-03 | 9.44   | 8.09  | 2.43E-01 | 12.10   | 9.10   | 1.84E-01 | 9.88   | 6.17  | 1.09E-01 | 16.66   | 12.04 | 1.67E-01 |
| cg10054197 | 18.95  | 7.01  | 6.90E-03 | 14.88  | 22.24 | 5.03E-01 | -99.07  | 112.60 | 3.79E-01 | 17.98  | 7.69  | 1.93E-02 | 44.77   | 27.60 | 1.05E-01 |
| cg09747891 | -10.95 | 4.05  | 6.90E-03 | -9.62  | 10.90 | 3.78E-01 | -19.94  | 16.59  | 2.30E-01 | -11.19 | 4.73  | 1.81E-02 | -3.29   | 15.39 | 8.31E-01 |
| cg14531564 | -8.60  | 3.18  | 6.90E-03 | -9.92  | 3.96  | 1.23E-02 | -5.19   | 6.90   | 4.52E-01 | -7.15  | 12.52 | 5.68E-01 | -8.20   | 11.46 | 4.74E-01 |
| cg16199098 | 18.47  | 6.84  | 6.90E-03 | 6.65   | 19.37 | 7.31E-01 | 65.06   | 53.68  | 2.25E-01 | 18.79  | 7.64  | 1.40E-02 | 26.32   | 28.19 | 3.50E-01 |

|            |        |       |          |        |       |          |         |        |          |        |       |          |        |       |          |
|------------|--------|-------|----------|--------|-------|----------|---------|--------|----------|--------|-------|----------|--------|-------|----------|
| cg00646546 | 22.83  | 8.45  | 6.90E-03 | 39.20  | 20.15 | 5.18E-02 | 26.53   | 22.31  | 2.34E-01 | 19.78  | 10.97 | 7.15E-02 | 4.57   | 28.54 | 8.73E-01 |
| cg02663193 | 24.20  | 8.96  | 6.91E-03 | 30.30  | 17.02 | 7.51E-02 | 20.30   | 18.98  | 2.85E-01 | 22.18  | 14.79 | 1.34E-01 | 23.58  | 24.51 | 3.36E-01 |
| cg22524657 | 21.04  | 7.79  | 6.91E-03 | 16.54  | 25.49 | 5.17E-01 | -27.85  | 87.82  | 7.51E-01 | 24.16  | 8.57  | 4.81E-03 | -3.34  | 28.85 | 9.08E-01 |
| cg12236164 | 24.04  | 8.90  | 6.91E-03 | 34.50  | 13.30 | 9.48E-03 | 31.09   | 23.84  | 1.92E-01 | 28.33  | 23.80 | 2.34E-01 | 1.07   | 17.04 | 9.50E-01 |
| cg24029050 | -16.91 | 6.26  | 6.91E-03 | -29.07 | 16.20 | 7.27E-02 | 10.36   | 19.99  | 6.04E-01 | -18.09 | 7.75  | 1.96E-02 | -17.81 | 19.79 | 3.68E-01 |
| cg20994801 | 19.75  | 7.31  | 6.91E-03 | 18.37  | 10.22 | 7.23E-02 | 29.99   | 16.82  | 7.45E-02 | -2.47  | 31.51 | 9.37E-01 | 19.61  | 14.76 | 1.84E-01 |
| cg02358434 | 21.57  | 7.99  | 6.92E-03 | 34.80  | 13.23 | 8.51E-03 | 5.37    | 14.67  | 7.15E-01 | 31.75  | 21.71 | 1.44E-01 | 14.70  | 17.69 | 4.06E-01 |
| cg21578322 | 22.99  | 8.51  | 6.92E-03 | 35.92  | 23.30 | 1.23E-01 | -84.82  | 87.38  | 3.32E-01 | 21.77  | 9.63  | 2.38E-02 | 26.31  | 31.02 | 3.96E-01 |
| cg01610488 | 26.14  | 9.68  | 6.92E-03 | 35.18  | 17.01 | 3.87E-02 | 25.86   | 28.53  | 3.65E-01 | 26.35  | 20.70 | 2.03E-01 | 17.56  | 16.55 | 2.88E-01 |
| cg20027296 | 19.07  | 7.06  | 6.92E-03 | 15.00  | 9.37  | 1.09E-01 | 17.11   | 16.37  | 2.96E-01 | 45.75  | 15.88 | 3.97E-03 | 9.17   | 12.19 | 4.52E-01 |
| cg12314527 | 13.61  | 5.04  | 6.93E-03 | 15.82  | 9.06  | 8.07E-02 | -7.39   | 16.03  | 6.45E-01 | 18.72  | 7.65  | 1.44E-02 | 8.32   | 12.70 | 5.12E-01 |
| cg25274468 | -16.77 | 6.21  | 6.93E-03 | -26.51 | 10.53 | 1.18E-02 | 1.10    | 15.65  | 9.44E-01 | -14.73 | 11.39 | 1.96E-01 | -16.92 | 13.99 | 2.27E-01 |
| cg21307043 | -24.27 | 8.99  | 6.93E-03 | -23.56 | 23.91 | 3.24E-01 | -53.09  | 50.45  | 2.93E-01 | -22.63 | 10.27 | 2.76E-02 | -31.47 | 36.33 | 3.86E-01 |
| cg08968034 | -13.80 | 5.11  | 6.94E-03 | -10.25 | 8.11  | 2.06E-01 | -19.23  | 12.09  | 1.12E-01 | -10.38 | 11.58 | 3.70E-01 | -18.67 | 10.70 | 8.11E-02 |
| cg13332193 | -16.78 | 6.22  | 6.94E-03 | -15.20 | 8.81  | 8.43E-02 | -10.52  | 14.99  | 4.83E-01 | -35.32 | 16.07 | 2.79E-02 | -11.73 | 14.66 | 4.24E-01 |
| cg16700673 | -41.22 | 15.27 | 6.95E-03 | -57.68 | 45.86 | 2.08E-01 | 195.38  | 189.54 | 3.03E-01 | -44.54 | 17.08 | 9.10E-03 | -5.75  | 53.03 | 9.14E-01 |
| cg02469487 | 61.03  | 22.61 | 6.95E-03 | 57.97  | 53.29 | 2.77E-01 | -166.53 | 266.95 | 5.33E-01 | 59.16  | 26.26 | 2.43E-02 | 110.74 | 84.39 | 1.89E-01 |
| cg17019285 | 49.38  | 18.29 | 6.95E-03 | 84.19  | 30.26 | 5.40E-03 | -117.56 | 157.52 | 4.55E-01 | 35.11  | 24.48 | 1.52E-01 | 17.90  | 64.91 | 7.83E-01 |
| cg04508233 | 41.22  | 15.27 | 6.96E-03 | 56.59  | 38.91 | 1.46E-01 | -43.11  | 189.46 | 8.20E-01 | 36.67  | 17.43 | 3.53E-02 | 64.72  | 57.23 | 2.58E-01 |
| cg08058988 | -15.99 | 5.93  | 6.96E-03 | -36.99 | 17.21 | 3.16E-02 | 6.66    | 35.54  | 8.51E-01 | -14.56 | 6.84  | 3.33E-02 | -8.39  | 18.46 | 6.49E-01 |
| cg20294155 | 27.82  | 10.31 | 6.97E-03 | 14.21  | 17.27 | 4.11E-01 | 28.15   | 42.55  | 5.08E-01 | 35.02  | 15.62 | 2.50E-02 | 39.15  | 26.68 | 1.42E-01 |
| cg21899743 | -48.11 | 17.83 | 6.97E-03 | -62.46 | 24.92 | 1.22E-02 | -9.17   | 95.66  | 9.24E-01 | -45.24 | 43.46 | 2.98E-01 | -28.73 | 33.41 | 3.90E-01 |
| cg11313780 | 14.87  | 5.51  | 6.98E-03 | 11.43  | 7.08  | 1.06E-01 | 33.49   | 11.47  | 3.51E-03 | 8.60   | 12.46 | 4.90E-01 | 7.60   | 13.36 | 5.69E-01 |
| cg01807748 | -17.04 | 6.31  | 6.98E-03 | -6.54  | 16.39 | 6.90E-01 | 0.90    | 28.38  | 9.75E-01 | -21.16 | 7.36  | 4.07E-03 | -8.31  | 24.43 | 7.34E-01 |
| cg09003373 | 19.83  | 7.35  | 6.99E-03 | 22.22  | 11.44 | 5.20E-02 | 19.61   | 14.85  | 1.87E-01 | 17.90  | 15.66 | 2.53E-01 | 15.64  | 21.11 | 4.59E-01 |
| cg24098938 | 35.04  | 12.99 | 6.99E-03 | 6.02   | 33.04 | 8.55E-01 | 2.91    | 145.12 | 9.84E-01 | 43.48  | 15.01 | 3.78E-03 | 17.23  | 43.71 | 6.93E-01 |
| cg11521212 | -10.87 | 4.03  | 7.00E-03 | -15.69 | 7.19  | 2.91E-02 | -16.19  | 10.42  | 1.20E-01 | -7.55  | 6.68  | 2.58E-01 | -4.45  | 9.72  | 6.47E-01 |
| cg01312837 | 18.45  | 6.84  | 7.00E-03 | 17.03  | 9.20  | 6.42E-02 | 38.83   | 14.07  | 5.79E-03 | 5.04   | 14.33 | 7.25E-01 | 7.94   | 22.24 | 7.21E-01 |
| cg06874403 | 13.33  | 4.94  | 7.00E-03 | 6.41   | 6.80  | 3.46E-01 | 18.41   | 10.97  | 9.33E-02 | 22.85  | 18.51 | 2.17E-01 | 23.18  | 11.13 | 3.72E-02 |
| cg05028089 | 39.47  | 14.64 | 7.01E-03 | 39.65  | 17.90 | 2.68E-02 | -12.89  | 69.78  | 8.53E-01 | 50.89  | 69.60 | 4.65E-01 | 46.40  | 29.70 | 1.18E-01 |
| cg24363955 | -13.35 | 4.95  | 7.01E-03 | -13.89 | 14.43 | 3.36E-01 | -5.24   | 20.67  | 8.00E-01 | -12.55 | 5.72  | 2.83E-02 | -26.73 | 18.04 | 1.39E-01 |
| cg05470497 | 26.61  | 9.87  | 7.01E-03 | 42.12  | 16.61 | 1.12E-02 | 20.67   | 17.92  | 2.49E-01 | 11.73  | 22.38 | 6.00E-01 | 21.38  | 25.57 | 4.03E-01 |
| cg05607502 | 9.32   | 3.46  | 7.02E-03 | 6.55   | 4.08  | 1.09E-01 | 17.82   | 7.10   | 1.21E-02 | 17.97  | 8.91  | 4.38E-02 | 2.99   | 5.98  | 6.17E-01 |
| cg04249066 | 39.48  | 14.65 | 7.03E-03 | 58.61  | 34.32 | 8.77E-02 | -26.96  | 104.14 | 7.96E-01 | 34.60  | 18.12 | 5.62E-02 | 46.50  | 38.47 | 2.27E-01 |
| cg08659357 | 28.25  | 10.48 | 7.03E-03 | 45.79  | 41.87 | 2.74E-01 | -46.16  | 119.95 | 7.00E-01 | 29.94  | 11.29 | 8.02E-03 | -0.68  | 39.97 | 9.86E-01 |

|            |        |       |          |        |       |          |        |        |          |        |       |          |        |       |          |
|------------|--------|-------|----------|--------|-------|----------|--------|--------|----------|--------|-------|----------|--------|-------|----------|
| cg23194719 | -38.77 | 14.38 | 7.03E-03 | -42.75 | 20.14 | 3.37E-02 | -34.93 | 37.54  | 3.52E-01 | 19.17  | 48.86 | 6.95E-01 | -52.61 | 28.40 | 6.40E-02 |
| cg01310330 | 19.33  | 7.17  | 7.03E-03 | 18.52  | 10.87 | 8.85E-02 | 27.56  | 14.25  | 5.31E-02 | 0.18   | 19.91 | 9.93E-01 | 23.44  | 16.80 | 1.63E-01 |
| cg02895051 | 23.61  | 8.76  | 7.03E-03 | 13.36  | 19.57 | 4.95E-01 | 32.52  | 20.57  | 1.14E-01 | 19.97  | 12.41 | 1.07E-01 | 42.33  | 25.27 | 9.39E-02 |
| cg00754253 | 7.28   | 2.70  | 7.03E-03 | 8.60   | 3.70  | 2.01E-02 | 14.25  | 7.18   | 4.72E-02 | 4.54   | 6.55  | 4.88E-01 | -0.58  | 6.84  | 9.32E-01 |
| cg09789768 | -10.10 | 3.75  | 7.03E-03 | -9.39  | 5.39  | 8.14E-02 | -7.61  | 9.13   | 4.04E-01 | -17.63 | 10.15 | 8.24E-02 | -8.86  | 8.15  | 2.77E-01 |
| cg21818274 | -11.91 | 4.42  | 7.04E-03 | -14.95 | 7.72  | 5.27E-02 | -2.44  | 9.91   | 8.06E-01 | -20.00 | 9.35  | 3.25E-02 | -8.24  | 8.85  | 3.52E-01 |
| cg25709978 | 24.43  | 9.07  | 7.04E-03 | 9.84   | 17.41 | 5.72E-01 | 32.71  | 18.75  | 8.11E-02 | 24.12  | 16.66 | 1.48E-01 | 35.04  | 20.32 | 8.46E-02 |
| cg26257869 | 24.48  | 9.08  | 7.04E-03 | 36.87  | 17.47 | 3.48E-02 | 13.07  | 19.30  | 4.98E-01 | 16.14  | 14.72 | 2.73E-01 | 42.88  | 25.42 | 9.17E-02 |
| cg11577689 | 37.22  | 13.81 | 7.04E-03 | 62.07  | 39.68 | 1.18E-01 | -62.70 | 193.07 | 7.45E-01 | 39.47  | 15.58 | 1.13E-02 | -11.34 | 46.57 | 8.08E-01 |
| cg09503045 | 32.76  | 12.16 | 7.04E-03 | 23.34  | 15.80 | 1.39E-01 | 14.23  | 35.86  | 6.92E-01 | 44.26  | 38.61 | 2.52E-01 | 66.65  | 27.62 | 1.58E-02 |
| cg03292648 | 26.80  | 9.94  | 7.04E-03 | 29.84  | 19.64 | 1.29E-01 | -5.94  | 40.59  | 8.84E-01 | 25.99  | 13.21 | 4.91E-02 | 40.83  | 29.07 | 1.60E-01 |
| cg07728793 | 17.43  | 6.47  | 7.05E-03 | 10.83  | 12.83 | 3.99E-01 | 26.72  | 34.80  | 4.43E-01 | 16.58  | 8.00  | 3.83E-02 | 50.82  | 27.00 | 5.98E-02 |
| cg21229079 | 20.31  | 7.54  | 7.05E-03 | 46.25  | 23.61 | 5.01E-02 | 16.57  | 36.37  | 6.49E-01 | 16.52  | 8.39  | 4.91E-02 | 32.00  | 34.10 | 3.48E-01 |
| cg15894948 | 23.07  | 8.57  | 7.07E-03 | 16.13  | 14.92 | 2.80E-01 | -1.29  | 34.23  | 9.70E-01 | 31.29  | 12.12 | 9.85E-03 | 20.41  | 25.98 | 4.32E-01 |
| cg06216620 | 24.57  | 9.12  | 7.07E-03 | -1.47  | 30.40 | 9.62E-01 | 33.91  | 136.37 | 8.04E-01 | 29.02  | 9.94  | 3.51E-03 | 1.82   | 36.26 | 9.60E-01 |
| cg08252499 | 30.50  | 11.32 | 7.07E-03 | 20.58  | 36.11 | 5.69E-01 | 25.39  | 176.23 | 8.85E-01 | 28.73  | 12.40 | 2.05E-02 | 69.71  | 45.07 | 1.22E-01 |
| cg00121884 | 20.38  | 7.57  | 7.07E-03 | 32.53  | 19.01 | 8.70E-02 | 30.54  | 25.01  | 2.22E-01 | 15.02  | 9.20  | 1.03E-01 | 30.68  | 27.73 | 2.69E-01 |
| cg24843389 | 54.37  | 20.18 | 7.07E-03 | 59.36  | 49.08 | 2.26E-01 | 119.77 | 196.62 | 5.42E-01 | 65.23  | 24.30 | 7.28E-03 | -14.72 | 55.85 | 7.92E-01 |
| cg09388991 | 9.35   | 3.47  | 7.07E-03 | 4.67   | 5.13  | 3.62E-01 | 11.80  | 6.32   | 6.19E-02 | 18.18  | 5.97  | 2.31E-03 | 3.07   | 6.69  | 6.46E-01 |
| cg22787604 | -17.37 | 6.45  | 7.07E-03 | -20.56 | 18.48 | 2.66E-01 | -18.81 | 20.53  | 3.60E-01 | -18.23 | 7.64  | 1.71E-02 | -0.41  | 24.85 | 9.87E-01 |
| cg03779078 | 27.29  | 10.13 | 7.08E-03 | 31.19  | 19.11 | 1.03E-01 | 36.41  | 35.54  | 3.06E-01 | 16.17  | 8.88  | 6.87E-02 | 70.37  | 28.18 | 1.25E-02 |
| cg10700634 | -32.42 | 12.04 | 7.08E-03 | -29.31 | 14.77 | 4.73E-02 | 10.84  | 32.18  | 7.36E-01 | -45.16 | 26.36 | 8.67E-02 | -65.66 | 30.37 | 3.06E-02 |
| cg15889106 | 13.95  | 5.18  | 7.08E-03 | 21.08  | 7.64  | 5.82E-03 | 13.81  | 13.57  | 3.09E-01 | 0.77   | 22.92 | 9.73E-01 | 6.45   | 8.83  | 4.65E-01 |
| cg17535702 | -15.97 | 5.93  | 7.09E-03 | -17.52 | 11.22 | 1.18E-01 | -28.82 | 13.00  | 2.66E-02 | -11.25 | 10.36 | 2.77E-01 | -7.51  | 13.78 | 5.86E-01 |
| cg20715365 | 26.53  | 9.85  | 7.09E-03 | 25.87  | 22.03 | 2.40E-01 | -31.49 | 69.18  | 6.49E-01 | 29.59  | 11.93 | 1.32E-02 | 18.61  | 31.42 | 5.54E-01 |
| cg19795722 | -15.57 | 5.78  | 7.10E-03 | -13.55 | 16.60 | 4.14E-01 | -24.86 | 28.62  | 3.85E-01 | -15.22 | 6.58  | 2.08E-02 | -17.76 | 22.68 | 4.34E-01 |
| cg27532955 | 10.15  | 3.77  | 7.10E-03 | 11.31  | 9.10  | 2.14E-01 | 6.73   | 12.18  | 5.81E-01 | 10.97  | 4.76  | 2.13E-02 | 6.52   | 11.64 | 5.75E-01 |
| cg20487230 | 23.47  | 8.72  | 7.10E-03 | 34.24  | 19.43 | 7.80E-02 | 34.60  | 39.00  | 3.75E-01 | 17.05  | 10.82 | 1.15E-01 | 37.85  | 27.57 | 1.70E-01 |
| cg12549345 | -17.44 | 6.48  | 7.11E-03 | -17.42 | 9.91  | 7.87E-02 | -18.06 | 14.38  | 2.09E-01 | -16.52 | 15.51 | 2.87E-01 | -17.68 | 14.69 | 2.29E-01 |
| cg02840367 | 19.19  | 7.13  | 7.12E-03 | 20.30  | 14.22 | 1.54E-01 | -13.06 | 24.94  | 6.00E-01 | 17.81  | 8.11  | 2.82E-02 | 44.13  | 19.70 | 2.51E-02 |
| cg13683301 | -15.61 | 5.80  | 7.12E-03 | -16.80 | 16.15 | 2.98E-01 | -3.38  | 26.60  | 8.99E-01 | -17.84 | 6.64  | 7.19E-03 | 5.65   | 23.64 | 8.11E-01 |
| cg03119028 | 10.37  | 3.85  | 7.12E-03 | 21.03  | 8.71  | 1.57E-02 | 7.04   | 13.44  | 6.01E-01 | 8.81   | 4.89  | 7.15E-02 | 1.92   | 12.22 | 8.75E-01 |
| cg07549297 | -9.46  | 3.52  | 7.12E-03 | -17.33 | 7.87  | 2.77E-02 | 8.84   | 14.81  | 5.50E-01 | -7.60  | 4.33  | 7.95E-02 | -15.39 | 10.49 | 1.42E-01 |
| cg00945666 | 12.22  | 4.54  | 7.13E-03 | 13.86  | 6.87  | 4.37E-02 | 19.14  | 14.64  | 1.91E-01 | 13.49  | 15.36 | 3.80E-01 | 8.29   | 7.37  | 2.61E-01 |
| cg27494615 | 28.62  | 10.64 | 7.13E-03 | 11.15  | 31.85 | 7.26E-01 | 75.95  | 104.72 | 4.68E-01 | 30.35  | 11.95 | 1.11E-02 | 29.68  | 36.32 | 4.14E-01 |

|            |        |       |          |        |       |          |         |        |          |        |       |          |        |       |          |
|------------|--------|-------|----------|--------|-------|----------|---------|--------|----------|--------|-------|----------|--------|-------|----------|
| cg14488605 | -29.47 | 10.95 | 7.13E-03 | -33.35 | 14.58 | 2.22E-02 | 0.59    | 29.31  | 9.84E-01 | -34.38 | 36.97 | 3.52E-01 | -37.04 | 23.99 | 1.23E-01 |
| cg03700308 | 39.97  | 14.85 | 7.13E-03 | 35.49  | 17.53 | 4.29E-02 | -12.95  | 68.07  | 8.49E-01 | 57.11  | 70.26 | 4.16E-01 | 66.15  | 34.11 | 5.24E-02 |
| cg07212778 | 20.00  | 7.43  | 7.13E-03 | 21.09  | 17.40 | 2.26E-01 | 17.53   | 25.35  | 4.89E-01 | 19.83  | 10.10 | 4.96E-02 | 20.56  | 17.07 | 2.29E-01 |
| cg27388962 | -11.84 | 4.40  | 7.14E-03 | -21.10 | 6.38  | 9.47E-04 | -13.86  | 11.18  | 2.15E-01 | -4.17  | 5.33  | 4.34E-01 | -10.82 | 9.24  | 2.42E-01 |
| cg03164043 | 37.70  | 14.01 | 7.14E-03 | 64.17  | 39.79 | 1.07E-01 | -200.24 | 177.05 | 2.58E-01 | 36.82  | 15.65 | 1.86E-02 | 21.68  | 53.83 | 6.87E-01 |
| cg20114732 | 18.90  | 7.03  | 7.14E-03 | 30.32  | 12.97 | 1.94E-02 | 24.12   | 30.31  | 4.26E-01 | 6.89   | 8.05  | 3.92E-01 | 29.98  | 12.82 | 1.93E-02 |
| cg23352003 | 23.88  | 8.88  | 7.15E-03 | 21.65  | 11.64 | 6.28E-02 | 44.09   | 42.02  | 2.94E-01 | 25.30  | 33.91 | 4.56E-01 | 24.86  | 16.09 | 1.22E-01 |
| cg23221052 | -2.52  | 0.94  | 7.16E-03 | -3.49  | 1.29  | 6.74E-03 | -1.33   | 2.00   | 5.05E-01 | -4.48  | 3.54  | 2.06E-01 | -0.38  | 2.19  | 8.64E-01 |
| cg00229423 | 26.40  | 9.82  | 7.16E-03 | 39.00  | 13.43 | 3.68E-03 | 19.12   | 29.69  | 5.20E-01 | 28.20  | 31.81 | 3.75E-01 | 3.01   | 19.21 | 8.76E-01 |
| cg18822036 | 16.71  | 6.21  | 7.16E-03 | 14.06  | 13.90 | 3.12E-01 | 25.04   | 13.93  | 7.22E-02 | 10.52  | 8.91  | 2.38E-01 | 33.04  | 18.32 | 7.13E-02 |
| cg05887636 | -53.51 | 19.90 | 7.16E-03 | -69.66 | 25.72 | 6.76E-03 | -6.88   | 62.99  | 9.13E-01 | -24.57 | 73.71 | 7.39E-01 | -40.81 | 41.59 | 3.26E-01 |
| cg13995427 | 13.68  | 5.09  | 7.16E-03 | 14.93  | 16.95 | 3.79E-01 | 42.57   | 51.56  | 4.09E-01 | 13.53  | 5.54  | 1.46E-02 | 9.02   | 21.15 | 6.70E-01 |
| cg22713187 | -21.11 | 7.85  | 7.17E-03 | -2.12  | 21.88 | 9.23E-01 | -65.51  | 34.23  | 5.57E-02 | -22.25 | 8.97  | 1.32E-02 | -6.76  | 34.16 | 8.43E-01 |
| cg16501323 | 10.78  | 4.01  | 7.17E-03 | 7.41   | 5.32  | 1.64E-01 | 4.29    | 10.14  | 6.72E-01 | 17.14  | 13.45 | 2.02E-01 | 23.29  | 9.24  | 1.17E-02 |
| cg13840174 | -14.07 | 5.23  | 7.18E-03 | -19.24 | 7.85  | 1.42E-02 | -4.88   | 12.77  | 7.02E-01 | -9.70  | 11.62 | 4.04E-01 | -14.81 | 12.19 | 2.25E-01 |
| cg24522654 | -10.02 | 3.73  | 7.18E-03 | -12.90 | 5.30  | 1.50E-02 | -3.92   | 9.59   | 6.83E-01 | -3.40  | 10.88 | 7.55E-01 | -11.19 | 7.66  | 1.44E-01 |
| cg12980632 | -21.39 | 7.96  | 7.18E-03 | -31.35 | 16.71 | 6.07E-02 | -1.30   | 22.53  | 9.54E-01 | -16.79 | 9.25  | 6.96E-02 | -58.70 | 27.59 | 3.34E-02 |
| cg13712012 | -10.70 | 3.98  | 7.19E-03 | -10.97 | 8.57  | 2.01E-01 | -16.01  | 13.04  | 2.20E-01 | -9.14  | 5.41  | 9.09E-02 | -12.65 | 10.29 | 2.19E-01 |
| cg17879133 | -14.89 | 5.54  | 7.19E-03 | -23.50 | 9.34  | 1.18E-02 | -13.91  | 21.13  | 5.10E-01 | -6.53  | 5.12  | 2.02E-01 | -25.73 | 11.22 | 2.19E-02 |
| cg23648516 | -14.81 | 5.51  | 7.19E-03 | -24.93 | 11.82 | 3.49E-02 | -5.56   | 26.58  | 8.34E-01 | -11.17 | 7.08  | 1.15E-01 | -17.79 | 15.03 | 2.37E-01 |
| cg11675492 | 11.21  | 4.17  | 7.20E-03 | 10.54  | 6.67  | 1.14E-01 | 6.45    | 7.84   | 4.11E-01 | 11.85  | 12.23 | 3.33E-01 | 18.54  | 9.12  | 4.20E-02 |
| cg02518338 | 13.47  | 5.01  | 7.20E-03 | 16.94  | 8.89  | 5.69E-02 | 16.07   | 10.31  | 1.19E-01 | 12.81  | 9.91  | 1.96E-01 | 5.35   | 11.48 | 6.41E-01 |
| cg23394462 | -19.38 | 7.21  | 7.21E-03 | -19.16 | 14.20 | 1.77E-01 | -20.34  | 34.53  | 5.56E-01 | -13.02 | 9.39  | 1.66E-01 | -53.89 | 21.84 | 1.36E-02 |
| cg08931647 | -16.95 | 6.31  | 7.21E-03 | -15.76 | 9.68  | 1.04E-01 | -6.81   | 18.14  | 7.07E-01 | -32.30 | 12.51 | 9.82E-03 | -6.12  | 14.07 | 6.64E-01 |
| cg08117745 | 16.95  | 6.31  | 7.22E-03 | 8.35   | 14.65 | 5.69E-01 | 20.38   | 25.57  | 4.25E-01 | 18.09  | 7.94  | 2.28E-02 | 22.39  | 18.00 | 2.14E-01 |
| cg18741586 | 20.28  | 7.55  | 7.22E-03 | 23.71  | 12.99 | 6.79E-02 | 17.05   | 11.53  | 1.39E-01 | 30.19  | 23.40 | 1.97E-01 | 14.06  | 20.95 | 5.02E-01 |
| cg07267294 | -11.22 | 4.18  | 7.22E-03 | -22.72 | 7.53  | 2.54E-03 | -8.82   | 13.90  | 5.26E-01 | -6.47  | 5.39  | 2.30E-01 | -7.08  | 10.22 | 4.89E-01 |
| cg25812095 | -13.00 | 4.84  | 7.22E-03 | -18.15 | 7.22  | 1.19E-02 | -8.95   | 12.22  | 4.64E-01 | -2.81  | 11.45 | 8.06E-01 | -13.65 | 10.44 | 1.91E-01 |
| cg21915647 | -29.08 | 10.83 | 7.23E-03 | -14.71 | 33.93 | 6.65E-01 | -232.69 | 159.15 | 1.44E-01 | -27.34 | 11.84 | 2.10E-02 | -63.21 | 44.97 | 1.60E-01 |
| cg24504014 | 6.96   | 2.59  | 7.23E-03 | 5.58   | 3.48  | 1.09E-01 | 14.31   | 7.16   | 4.56E-02 | 8.52   | 5.87  | 1.47E-01 | 2.75   | 7.50  | 7.14E-01 |
| cg24801210 | -52.06 | 19.38 | 7.23E-03 | -70.17 | 51.51 | 1.73E-01 | -98.84  | 187.15 | 5.97E-01 | -42.03 | 22.49 | 6.16E-02 | -93.86 | 59.85 | 1.17E-01 |
| cg26188685 | -7.21  | 2.68  | 7.23E-03 | -5.00  | 2.81  | 7.52E-02 | -14.68  | 4.24   | 5.42E-04 | -1.07  | 6.31  | 8.65E-01 | -6.51  | 4.94  | 1.87E-01 |
| cg20603611 | 27.37  | 10.19 | 7.23E-03 | 14.10  | 15.28 | 3.56E-01 | 56.44   | 30.26  | 6.22E-02 | 33.48  | 37.73 | 3.75E-01 | 33.25  | 16.79 | 4.76E-02 |
| cg21646598 | 13.75  | 5.12  | 7.24E-03 | 7.36   | 18.42 | 6.90E-01 | 42.98   | 75.06  | 5.67E-01 | 15.27  | 5.59  | 6.28E-03 | 2.04   | 18.29 | 9.11E-01 |
| cg03115444 | 17.59  | 6.55  | 7.24E-03 | 10.80  | 15.72 | 4.92E-01 | -3.27   | 31.15  | 9.16E-01 | 23.34  | 7.75  | 2.61E-03 | -11.39 | 24.90 | 6.47E-01 |

|            |        |       |          |        |       |          |         |        |          |        |       |          |        |       |          |
|------------|--------|-------|----------|--------|-------|----------|---------|--------|----------|--------|-------|----------|--------|-------|----------|
| cg27561875 | 27.49  | 10.23 | 7.24E-03 | 6.35   | 21.62 | 7.69E-01 | 27.94   | 23.04  | 2.25E-01 | 35.49  | 14.96 | 1.77E-02 | 35.65  | 30.78 | 2.47E-01 |
| cg17176016 | 19.98  | 7.44  | 7.24E-03 | 20.97  | 10.21 | 4.00E-02 | 5.92    | 19.34  | 7.59E-01 | 37.63  | 31.51 | 2.32E-01 | 22.12  | 14.44 | 1.26E-01 |
| cg25339112 | -14.10 | 5.25  | 7.24E-03 | -18.75 | 8.03  | 1.95E-02 | -6.21   | 10.48  | 5.54E-01 | -6.20  | 15.85 | 6.96E-01 | -18.13 | 11.41 | 1.12E-01 |
| cg11399640 | -10.24 | 3.81  | 7.24E-03 | -16.51 | 7.37  | 2.51E-02 | -4.59   | 8.57   | 5.93E-01 | -11.12 | 6.24  | 7.49E-02 | -4.74  | 9.48  | 6.17E-01 |
| cg01056478 | 24.31  | 9.05  | 7.25E-03 | 31.85  | 10.91 | 3.51E-03 | 37.57   | 48.60  | 4.40E-01 | 3.95   | 39.81 | 9.21E-01 | 3.91   | 19.06 | 8.38E-01 |
| cg20605045 | 24.51  | 9.13  | 7.25E-03 | 18.83  | 27.26 | 4.90E-01 | -54.91  | 117.48 | 6.40E-01 | 27.76  | 10.04 | 5.68E-03 | -4.14  | 38.96 | 9.15E-01 |
| cg16523850 | -4.80  | 1.79  | 7.25E-03 | -7.52  | 2.88  | 9.11E-03 | -0.71   | 3.48   | 8.39E-01 | -6.22  | 4.04  | 1.24E-01 | -3.24  | 4.52  | 4.74E-01 |
| cg06845268 | -16.19 | 6.03  | 7.25E-03 | -29.71 | 16.65 | 7.44E-02 | 18.29   | 27.11  | 5.00E-01 | -16.62 | 6.88  | 1.57E-02 | -8.34  | 26.66 | 7.54E-01 |
| cg09157127 | -10.41 | 3.88  | 7.26E-03 | -22.35 | 9.27  | 1.59E-02 | 3.35    | 16.99  | 8.43E-01 | -8.16  | 4.88  | 9.41E-02 | -10.74 | 10.34 | 2.99E-01 |
| cg10210728 | 28.19  | 10.50 | 7.26E-03 | 26.18  | 24.43 | 2.84E-01 | 25.93   | 69.37  | 7.09E-01 | 29.43  | 13.07 | 2.43E-02 | 25.58  | 27.40 | 3.51E-01 |
| cg03231447 | -40.18 | 14.97 | 7.26E-03 | -43.79 | 21.54 | 4.21E-02 | 37.41   | 65.75  | 5.69E-01 | -63.73 | 31.35 | 4.21E-02 | -27.18 | 30.70 | 3.76E-01 |
| cg13460556 | 7.34   | 2.73  | 7.26E-03 | 6.45   | 3.79  | 8.92E-02 | 9.07    | 5.94   | 1.27E-01 | 12.46  | 4.68  | 7.68E-03 | -3.13  | 7.09  | 6.59E-01 |
| cg27173322 | 51.54  | 19.20 | 7.26E-03 | 96.49  | 54.05 | 7.42E-02 | -142.25 | 262.51 | 5.88E-01 | 48.45  | 21.66 | 2.53E-02 | 24.99  | 66.53 | 7.07E-01 |
| cg09744448 | -18.76 | 6.99  | 7.27E-03 | -23.52 | 10.67 | 2.75E-02 | -3.06   | 16.79  | 8.55E-01 | -28.60 | 19.27 | 1.38E-01 | -16.45 | 13.55 | 2.25E-01 |
| cg12519676 | -6.12  | 2.28  | 7.27E-03 | -7.18  | 3.42  | 3.58E-02 | -0.81   | 4.46   | 8.56E-01 | -12.45 | 7.88  | 1.14E-01 | -7.98  | 4.98  | 1.09E-01 |
| cg09103234 | 16.83  | 6.27  | 7.27E-03 | -0.91  | 11.45 | 9.36E-01 | 17.25   | 11.19  | 1.23E-01 | 24.01  | 8.20  | 3.41E-03 | 30.65  | 19.53 | 1.17E-01 |
| cg15829619 | -51.53 | 19.20 | 7.28E-03 | -53.15 | 25.24 | 3.52E-02 | -56.40  | 71.36  | 4.29E-01 | -6.62  | 66.89 | 9.21E-01 | -60.58 | 37.21 | 1.03E-01 |
| cg26434278 | 44.35  | 16.53 | 7.28E-03 | 33.52  | 55.76 | 5.48E-01 | -87.84  | 212.70 | 6.80E-01 | 45.52  | 17.96 | 1.13E-02 | 57.05  | 67.68 | 3.99E-01 |
| cg02648589 | 8.20   | 3.06  | 7.30E-03 | 11.12  | 4.08  | 6.38E-03 | 7.89    | 7.56   | 2.97E-01 | 8.45   | 8.84  | 3.39E-01 | -2.24  | 7.76  | 7.72E-01 |
| cg27339840 | -48.32 | 18.01 | 7.30E-03 | -66.48 | 22.71 | 3.41E-03 | -54.15  | 76.93  | 4.81E-01 | -45.60 | 67.85 | 5.02E-01 | -1.27  | 36.35 | 9.72E-01 |
| cg13338302 | -42.91 | 15.99 | 7.30E-03 | -42.67 | 39.67 | 2.82E-01 | 8.65    | 253.83 | 9.73E-01 | -51.57 | 18.63 | 5.64E-03 | 20.58  | 51.43 | 6.89E-01 |
| cg26927427 | 11.62  | 4.33  | 7.31E-03 | 11.12  | 6.15  | 7.04E-02 | 22.50   | 8.67   | 9.45E-03 | -6.42  | 15.25 | 6.74E-01 | 7.85   | 8.55  | 3.59E-01 |
| cg08349093 | -13.61 | 5.07  | 7.32E-03 | -14.88 | 9.47  | 1.16E-01 | -6.83   | 13.10  | 6.02E-01 | -11.05 | 9.23  | 2.31E-01 | -19.06 | 9.94  | 5.50E-02 |
| cg24254196 | -9.96  | 3.71  | 7.32E-03 | -10.72 | 7.01  | 1.26E-01 | 2.47    | 11.51  | 8.30E-01 | -11.20 | 5.04  | 2.64E-02 | -15.64 | 13.80 | 2.57E-01 |
| cg07196426 | 8.95   | 3.34  | 7.32E-03 | 7.50   | 4.37  | 8.57E-02 | 7.31    | 8.55   | 3.93E-01 | 9.97   | 9.84  | 3.11E-01 | 15.48  | 8.64  | 7.32E-02 |
| cg00923919 | -35.90 | 13.39 | 7.33E-03 | -54.04 | 22.22 | 1.50E-02 | 7.64    | 119.24 | 9.49E-01 | -29.29 | 20.99 | 1.63E-01 | -20.51 | 28.72 | 4.75E-01 |
| cg14354895 | 18.15  | 6.77  | 7.33E-03 | 18.73  | 9.25  | 4.28E-02 | 13.95   | 27.97  | 6.18E-01 | 30.87  | 24.33 | 2.05E-01 | 14.95  | 11.82 | 2.06E-01 |
| cg20872692 | -20.01 | 7.46  | 7.33E-03 | -1.91  | 19.15 | 9.21E-01 | -18.63  | 34.69  | 5.91E-01 | -23.58 | 8.76  | 7.10E-03 | -22.90 | 27.04 | 3.97E-01 |
| cg19510663 | 22.62  | 8.44  | 7.34E-03 | 16.69  | 16.64 | 3.16E-01 | 4.50    | 17.65  | 7.99E-01 | 36.46  | 13.09 | 5.34E-03 | 21.70  | 26.84 | 4.19E-01 |
| cg11797656 | 24.79  | 9.25  | 7.34E-03 | 26.36  | 19.84 | 1.84E-01 | 39.75   | 18.39  | 3.07E-02 | 24.16  | 14.64 | 9.90E-02 | -4.78  | 25.56 | 8.52E-01 |
| cg11122493 | 59.41  | 22.16 | 7.35E-03 | -14.40 | 52.63 | 7.84E-01 | 239.37  | 188.10 | 2.03E-01 | 65.01  | 17.61 | 2.22E-04 | 101.24 | 60.73 | 9.55E-02 |
| cg23616097 | 10.64  | 3.97  | 7.35E-03 | 13.98  | 7.40  | 5.90E-02 | 12.92   | 12.38  | 2.96E-01 | 8.80   | 5.43  | 1.05E-01 | 7.86   | 14.44 | 5.86E-01 |
| cg25240964 | -9.28  | 3.46  | 7.35E-03 | -18.74 | 8.67  | 3.06E-02 | -10.44  | 13.56  | 4.41E-01 | -5.84  | 4.19  | 1.63E-01 | -17.70 | 11.47 | 1.23E-01 |
| cg24514412 | 38.06  | 14.20 | 7.36E-03 | 45.46  | 21.15 | 3.16E-02 | 18.20   | 45.35  | 6.88E-01 | 66.61  | 38.55 | 8.40E-02 | 21.37  | 25.29 | 3.98E-01 |
| cg06254729 | 26.27  | 9.80  | 7.36E-03 | 6.38   | 19.74 | 7.47E-01 | 23.38   | 51.23  | 6.48E-01 | 34.76  | 12.63 | 5.92E-03 | 25.37  | 28.94 | 3.81E-01 |

|            |        |       |          |        |       |          |        |        |          |        |       |          |        |       |          |
|------------|--------|-------|----------|--------|-------|----------|--------|--------|----------|--------|-------|----------|--------|-------|----------|
| cg23716696 | 27.17  | 10.14 | 7.36E-03 | -9.53  | 30.78 | 7.57E-01 | 28.00  | 161.10 | 8.62E-01 | 31.54  | 11.14 | 4.64E-03 | 33.25  | 41.62 | 4.24E-01 |
| cg10913077 | -12.32 | 4.60  | 7.36E-03 | -18.75 | 7.07  | 8.01E-03 | -10.52 | 10.70  | 3.26E-01 | -1.71  | 11.72 | 8.84E-01 | -9.16  | 9.39  | 3.29E-01 |
| cg06900494 | -11.93 | 4.45  | 7.36E-03 | -13.07 | 6.30  | 3.81E-02 | -20.39 | 9.68   | 3.52E-02 | 12.33  | 18.12 | 4.96E-01 | -8.04  | 9.30  | 3.87E-01 |
| cg03883256 | -11.84 | 4.42  | 7.36E-03 | -13.74 | 6.85  | 4.50E-02 | -5.84  | 10.24  | 5.69E-01 | -17.32 | 10.46 | 9.78E-02 | -8.89  | 9.43  | 3.46E-01 |
| cg24033042 | 14.71  | 5.49  | 7.37E-03 | 16.67  | 8.02  | 3.78E-02 | 25.45  | 13.45  | 5.84E-02 | 13.10  | 16.65 | 4.31E-01 | 4.85   | 10.84 | 6.55E-01 |
| cg05150697 | 28.25  | 10.54 | 7.37E-03 | 23.16  | 19.58 | 2.37E-01 | 34.68  | 19.57  | 7.63E-02 | 23.29  | 19.96 | 2.43E-01 | 35.30  | 28.09 | 2.09E-01 |
| cg16564824 | 38.46  | 14.35 | 7.38E-03 | 49.56  | 21.59 | 2.17E-02 | 11.05  | 40.28  | 7.84E-01 | 16.14  | 39.22 | 6.81E-01 | 43.72  | 26.34 | 9.69E-02 |
| cg03882967 | -9.77  | 3.65  | 7.38E-03 | -12.84 | 8.14  | 1.15E-01 | -13.90 | 13.34  | 2.97E-01 | -6.93  | 4.64  | 1.36E-01 | -17.40 | 11.09 | 1.17E-01 |
| cg26172504 | 8.92   | 3.33  | 7.38E-03 | 5.05   | 5.01  | 3.13E-01 | 18.98  | 7.76   | 1.45E-02 | 11.63  | 7.65  | 1.29E-01 | 5.38   | 7.74  | 4.87E-01 |
| cg00083596 | -10.85 | 4.05  | 7.38E-03 | -24.38 | 11.27 | 3.05E-02 | -5.89  | 22.67  | 7.95E-01 | -9.13  | 4.66  | 5.00E-02 | -7.37  | 14.09 | 6.01E-01 |
| cg25815482 | 7.68   | 2.87  | 7.38E-03 | 1.98   | 6.24  | 7.51E-01 | 0.63   | 7.58   | 9.34E-01 | 11.96  | 4.05  | 3.16E-03 | 8.17   | 7.53  | 2.78E-01 |
| cg06297554 | 18.19  | 6.79  | 7.38E-03 | 33.02  | 17.48 | 5.89E-02 | -6.65  | 21.33  | 7.55E-01 | 17.82  | 8.24  | 3.06E-02 | 25.77  | 25.73 | 3.17E-01 |
| cg13382694 | 14.92  | 5.57  | 7.39E-03 | 11.37  | 7.35  | 1.22E-01 | 21.22  | 13.75  | 1.23E-01 | 18.51  | 21.05 | 3.79E-01 | 18.85  | 12.73 | 1.39E-01 |
| cg18464274 | 10.29  | 3.84  | 7.39E-03 | 11.37  | 5.19  | 2.83E-02 | 6.31   | 9.38   | 5.01E-01 | 13.53  | 10.90 | 2.14E-01 | 8.23   | 9.61  | 3.92E-01 |
| cg16151494 | 4.89   | 1.83  | 7.40E-03 | 6.01   | 2.76  | 2.93E-02 | 2.02   | 4.00   | 6.13E-01 | 6.90   | 4.33  | 1.11E-01 | 3.46   | 4.37  | 4.28E-01 |
| cg17560929 | 15.60  | 5.82  | 7.40E-03 | 12.83  | 8.61  | 1.36E-01 | 28.07  | 11.27  | 1.28E-02 | 13.58  | 15.58 | 3.84E-01 | 2.49   | 15.77 | 8.74E-01 |
| cg05393578 | 17.72  | 6.62  | 7.41E-03 | 17.08  | 10.14 | 9.23E-02 | 22.67  | 14.19  | 1.10E-01 | 25.76  | 14.72 | 8.02E-02 | 2.05   | 16.82 | 9.03E-01 |
| cg15229747 | 16.13  | 6.02  | 7.41E-03 | 18.85  | 7.82  | 1.60E-02 | 11.33  | 18.51  | 5.40E-01 | 7.35   | 31.79 | 8.17E-01 | 13.16  | 11.70 | 2.61E-01 |
| cg15095913 | 22.64  | 8.45  | 7.41E-03 | 31.73  | 16.75 | 5.83E-02 | 22.79  | 15.35  | 1.37E-01 | 20.16  | 15.09 | 1.82E-01 | 10.27  | 23.64 | 6.64E-01 |
| cg20441701 | 13.70  | 5.12  | 7.41E-03 | 11.97  | 5.75  | 3.75E-02 | 31.80  | 9.79   | 1.16E-03 | 4.96   | 9.72  | 6.10E-01 | 8.64   | 8.67  | 3.19E-01 |
| cg16497219 | -52.90 | 19.76 | 7.41E-03 | -66.34 | 26.50 | 1.23E-02 | -61.74 | 115.69 | 5.94E-01 | -48.78 | 42.11 | 2.47E-01 | -17.94 | 44.73 | 6.88E-01 |
| cg20312179 | -9.42  | 3.52  | 7.41E-03 | -11.26 | 7.07  | 1.11E-01 | 1.65   | 13.18  | 9.00E-01 | -8.81  | 4.85  | 6.94E-02 | -13.61 | 8.91  | 1.27E-01 |
| cg02055351 | 26.10  | 9.75  | 7.43E-03 | 26.63  | 17.56 | 1.29E-01 | 20.13  | 19.79  | 3.09E-01 | 23.18  | 17.88 | 1.95E-01 | 40.25  | 25.01 | 1.08E-01 |
| cg03813443 | 24.19  | 9.04  | 7.43E-03 | 39.89  | 27.05 | 1.40E-01 | 25.85  | 15.51  | 9.56E-02 | 19.24  | 13.21 | 1.45E-01 | 24.26  | 31.78 | 4.45E-01 |
| cg09012544 | 36.95  | 13.80 | 7.43E-03 | 33.90  | 19.29 | 7.89E-02 | -6.36  | 68.30  | 9.26E-01 | 14.90  | 41.54 | 7.20E-01 | 54.08  | 23.79 | 2.30E-02 |
| cg17946266 | -12.35 | 4.61  | 7.43E-03 | -27.37 | 10.70 | 1.06E-02 | -8.40  | 20.31  | 6.79E-01 | -7.94  | 5.62  | 1.58E-01 | -16.66 | 15.46 | 2.81E-01 |
| cg09302724 | 25.28  | 9.44  | 7.43E-03 | 22.31  | 16.28 | 1.70E-01 | 28.51  | 20.89  | 1.72E-01 | 18.23  | 16.17 | 2.60E-01 | 48.50  | 27.49 | 7.77E-02 |
| cg02289168 | 23.67  | 8.84  | 7.43E-03 | 30.62  | 18.47 | 9.73E-02 | 20.92  | 18.13  | 2.49E-01 | 30.98  | 14.03 | 2.72E-02 | -4.78  | 24.07 | 8.43E-01 |
| cg27372015 | 21.54  | 8.05  | 7.44E-03 | 10.45  | 18.47 | 5.71E-01 | 48.21  | 26.11  | 6.49E-02 | 19.47  | 9.98  | 5.10E-02 | 35.48  | 31.49 | 2.60E-01 |
| cg16592713 | 25.43  | 9.50  | 7.44E-03 | 47.83  | 34.63 | 1.67E-01 | -53.01 | 110.98 | 6.33E-01 | 24.50  | 10.22 | 1.65E-02 | 19.69  | 41.35 | 6.34E-01 |
| cg17769836 | -18.17 | 6.79  | 7.44E-03 | -17.50 | 10.69 | 1.02E-01 | -16.10 | 14.04  | 2.51E-01 | -16.64 | 17.94 | 3.54E-01 | -22.63 | 14.50 | 1.19E-01 |
| cg06461306 | 19.42  | 7.26  | 7.45E-03 | 15.80  | 9.46  | 9.50E-02 | 30.95  | 17.19  | 7.17E-02 | -18.32 | 34.50 | 5.95E-01 | 28.62  | 16.68 | 8.62E-02 |
| cg08961621 | -19.71 | 7.37  | 7.45E-03 | -15.61 | 14.89 | 2.94E-01 | -17.66 | 16.48  | 2.84E-01 | -24.24 | 11.39 | 3.34E-02 | -16.24 | 19.88 | 4.14E-01 |
| cg15162330 | 33.52  | 12.53 | 7.46E-03 | 45.85  | 17.56 | 9.05E-03 | 21.64  | 44.60  | 6.28E-01 | 55.62  | 43.45 | 2.01E-01 | 11.75  | 21.82 | 5.90E-01 |
| cg04824189 | -13.53 | 5.06  | 7.46E-03 | -26.70 | 10.60 | 1.18E-02 | 4.48   | 16.94  | 7.92E-01 | -12.94 | 7.04  | 6.62E-02 | -7.03  | 12.34 | 5.69E-01 |

|            |        |       |          |        |       |          |         |        |          |        |       |          |        |       |          |
|------------|--------|-------|----------|--------|-------|----------|---------|--------|----------|--------|-------|----------|--------|-------|----------|
| cg10616216 | -20.70 | 7.74  | 7.46E-03 | -0.46  | 17.25 | 9.79E-01 | -4.74   | 42.09  | 9.10E-01 | -29.60 | 9.46  | 1.76E-03 | -6.88  | 24.90 | 7.82E-01 |
| cg26535834 | -15.16 | 5.67  | 7.46E-03 | 2.66   | 14.08 | 8.50E-01 | -22.88  | 28.81  | 4.27E-01 | -19.85 | 6.60  | 2.65E-03 | -1.48  | 22.59 | 9.48E-01 |
| cg15033552 | -14.38 | 5.38  | 7.47E-03 | -22.79 | 13.99 | 1.03E-01 | -21.68  | 22.81  | 3.42E-01 | -10.99 | 6.45  | 8.84E-02 | -21.41 | 16.88 | 2.05E-01 |
| cg23401624 | 50.03  | 18.70 | 7.48E-03 | 33.35  | 51.81 | 5.20E-01 | -28.62  | 174.54 | 8.70E-01 | 46.04  | 21.03 | 2.86E-02 | 142.69 | 72.12 | 4.79E-02 |
| cg07731025 | -36.72 | 13.73 | 7.48E-03 | -54.36 | 48.95 | 2.67E-01 | -75.41  | 198.29 | 7.04E-01 | -36.74 | 14.85 | 1.33E-02 | -10.77 | 55.36 | 8.46E-01 |
| cg03407631 | 16.49  | 6.17  | 7.50E-03 | 13.81  | 15.22 | 3.64E-01 | -16.93  | 20.77  | 4.15E-01 | 22.08  | 5.92  | 1.90E-04 | 14.05  | 15.70 | 3.71E-01 |
| cg09781307 | -12.62 | 4.72  | 7.50E-03 | -13.94 | 7.58  | 6.59E-02 | -14.74  | 9.94   | 1.38E-01 | -6.46  | 10.91 | 5.54E-01 | -13.44 | 10.56 | 2.03E-01 |
| cg03270036 | 21.64  | 8.09  | 7.50E-03 | 15.87  | 18.92 | 4.02E-01 | 20.16   | 18.59  | 2.78E-01 | 21.96  | 11.00 | 4.58E-02 | 35.33  | 27.72 | 2.02E-01 |
| cg02079034 | 17.66  | 6.60  | 7.51E-03 | 39.92  | 16.51 | 1.56E-02 | 39.28   | 35.57  | 2.70E-01 | 12.96  | 7.81  | 9.69E-02 | 7.15   | 22.01 | 7.45E-01 |
| cg23923495 | 21.62  | 8.09  | 7.52E-03 | 28.95  | 10.83 | 7.53E-03 | 24.17   | 24.30  | 3.20E-01 | 14.39  | 35.05 | 6.81E-01 | 7.32   | 15.33 | 6.33E-01 |
| cg17554636 | -19.61 | 7.33  | 7.52E-03 | -16.90 | 8.18  | 3.88E-02 | -77.27  | 45.65  | 9.05E-02 | -36.11 | 28.90 | 2.11E-01 | -16.01 | 22.56 | 4.78E-01 |
| cg11424828 | -2.38  | 0.89  | 7.52E-03 | -3.36  | 1.27  | 8.42E-03 | -1.26   | 2.07   | 5.43E-01 | -0.16  | 2.75  | 9.54E-01 | -2.21  | 1.89  | 2.42E-01 |
| cg24018321 | -14.97 | 5.60  | 7.52E-03 | -20.51 | 8.74  | 1.89E-02 | -8.55   | 11.50  | 4.57E-01 | -0.73  | 17.19 | 9.66E-01 | -18.08 | 11.31 | 1.10E-01 |
| cg24055349 | 33.15  | 12.40 | 7.52E-03 | 31.56  | 34.52 | 3.61E-01 | -24.79  | 134.96 | 8.54E-01 | 32.91  | 14.07 | 1.93E-02 | 43.61  | 42.57 | 3.06E-01 |
| cg06800231 | -8.11  | 3.03  | 7.53E-03 | -7.15  | 4.51  | 1.13E-01 | -14.27  | 6.44   | 2.67E-02 | -2.46  | 11.35 | 8.28E-01 | -6.02  | 6.03  | 3.18E-01 |
| cg15496388 | 13.42  | 5.02  | 7.53E-03 | 15.69  | 6.78  | 2.06E-02 | 21.46   | 12.83  | 9.43E-02 | 16.75  | 14.73 | 2.56E-01 | -2.42  | 11.81 | 8.38E-01 |
| cg27158490 | -61.44 | 22.99 | 7.54E-03 | -96.01 | 39.48 | 1.50E-02 | -418.81 | 250.01 | 9.39E-02 | -45.08 | 24.22 | 6.28E-02 | -35.77 | 62.99 | 5.70E-01 |
| cg04909834 | -27.80 | 10.41 | 7.54E-03 | -36.60 | 14.49 | 1.16E-02 | 7.42    | 24.44  | 7.61E-01 | -26.22 | 28.13 | 3.51E-01 | -40.21 | 25.50 | 1.15E-01 |
| cg07970724 | -12.12 | 4.54  | 7.54E-03 | -21.39 | 8.15  | 8.64E-03 | 2.02    | 21.68  | 9.26E-01 | -8.04  | 6.03  | 1.83E-01 | -12.83 | 16.04 | 4.24E-01 |
| cg16290301 | -36.29 | 13.58 | 7.55E-03 | -27.84 | 17.61 | 1.14E-01 | -79.62  | 39.86  | 4.58E-02 | -34.56 | 49.17 | 4.82E-01 | -36.89 | 29.45 | 2.10E-01 |
| cg16678522 | 7.72   | 2.89  | 7.56E-03 | 7.04   | 4.07  | 8.38E-02 | 13.00   | 7.25   | 7.31E-02 | 12.06  | 6.31  | 5.61E-02 | -3.22  | 8.05  | 6.90E-01 |
| cg06644998 | -12.87 | 4.82  | 7.56E-03 | -12.28 | 9.33  | 1.88E-01 | -8.79   | 19.77  | 6.56E-01 | -14.78 | 6.69  | 2.71E-02 | -9.04  | 12.23 | 4.60E-01 |
| cg26271970 | -20.34 | 7.62  | 7.56E-03 | -29.22 | 10.40 | 4.96E-03 | 4.80    | 16.15  | 7.66E-01 | -33.33 | 15.77 | 3.45E-02 | -16.53 | 12.71 | 1.93E-01 |
| cg21239001 | 6.12   | 2.29  | 7.57E-03 | 4.92   | 3.38  | 1.46E-01 | 14.01   | 5.57   | 1.20E-02 | 3.51   | 4.34  | 4.19E-01 | 5.55   | 7.51  | 4.60E-01 |
| cg06932535 | -11.20 | 4.19  | 7.57E-03 | -23.82 | 10.28 | 2.05E-02 | -6.47   | 18.86  | 7.32E-01 | -10.77 | 5.08  | 3.40E-02 | 4.00   | 13.01 | 7.59E-01 |
| cg19851563 | 4.76   | 1.78  | 7.57E-03 | 4.11   | 2.26  | 6.90E-02 | 0.99    | 4.04   | 8.06E-01 | 14.26  | 7.27  | 4.99E-02 | 7.47   | 4.04  | 6.45E-02 |
| cg24009118 | 19.79  | 7.41  | 7.57E-03 | 18.17  | 11.60 | 1.17E-01 | 22.65   | 15.27  | 1.38E-01 | 33.20  | 17.23 | 5.40E-02 | 5.22   | 17.92 | 7.71E-01 |
| cg17985656 | 27.81  | 10.42 | 7.57E-03 | 23.98  | 16.83 | 1.54E-01 | 6.32    | 33.03  | 8.48E-01 | 44.58  | 21.08 | 3.44E-02 | 26.03  | 19.92 | 1.91E-01 |
| cg13220109 | 84.83  | 31.77 | 7.57E-03 | 59.65  | 82.82 | 4.71E-01 | -126.85 | 309.96 | 6.82E-01 | 102.88 | 37.01 | 5.44E-03 | 15.05  | 97.72 | 8.78E-01 |
| cg10407136 | -51.98 | 19.46 | 7.57E-03 | -54.73 | 24.33 | 2.45E-02 | -41.68  | 102.85 | 6.85E-01 | -37.72 | 78.98 | 6.33E-01 | -49.99 | 37.93 | 1.88E-01 |
| cg17126555 | 15.04  | 5.63  | 7.58E-03 | 18.86  | 9.20  | 4.02E-02 | 8.07    | 11.37  | 4.78E-01 | 10.14  | 10.58 | 3.38E-01 | 32.38  | 18.18 | 7.49E-02 |
| cg13556511 | 17.10  | 6.40  | 7.58E-03 | 5.91   | 24.18 | 8.07E-01 | 81.89   | 64.21  | 2.02E-01 | 18.79  | 7.04  | 7.61E-03 | 3.48   | 21.11 | 8.69E-01 |
| cg08460464 | -12.85 | 4.81  | 7.58E-03 | -22.30 | 11.47 | 5.19E-02 | -8.95   | 17.00  | 5.99E-01 | -8.66  | 6.04  | 1.52E-01 | -24.67 | 14.49 | 8.87E-02 |
| cg13379408 | 15.56  | 5.83  | 7.58E-03 | 15.29  | 11.23 | 1.73E-01 | -10.50  | 25.16  | 6.76E-01 | 19.11  | 7.93  | 1.60E-02 | 12.31  | 15.68 | 4.33E-01 |
| cg23205454 | -14.27 | 5.34  | 7.58E-03 | -21.52 | 8.48  | 1.12E-02 | -7.57   | 11.73  | 5.19E-01 | -15.49 | 11.85 | 1.91E-01 | -5.23  | 12.18 | 6.68E-01 |



|            |        |       |          |        |       |          |        |        |          |        |       |          |        |       |          |
|------------|--------|-------|----------|--------|-------|----------|--------|--------|----------|--------|-------|----------|--------|-------|----------|
| cg18813527 | -13.65 | 5.11  | 7.60E-03 | -22.96 | 10.22 | 2.47E-02 | -16.17 | 12.22  | 1.86E-01 | -3.24  | 8.12  | 6.90E-01 | -21.16 | 12.08 | 7.97E-02 |
| cg21556527 | -17.81 | 6.67  | 7.60E-03 | -31.37 | 12.92 | 1.52E-02 | -8.91  | 16.51  | 5.90E-01 | -9.88  | 6.19  | 1.11E-01 | -35.58 | 16.37 | 2.97E-02 |
| cg01306688 | 12.86  | 4.82  | 7.61E-03 | 9.48   | 7.32  | 1.96E-01 | 13.62  | 9.10   | 1.35E-01 | -0.43  | 14.72 | 9.77E-01 | 27.74  | 11.36 | 1.46E-02 |
| cg05337391 | 37.64  | 14.10 | 7.61E-03 | 41.09  | 15.72 | 8.93E-03 | -39.28 | 100.91 | 6.97E-01 | -28.99 | 83.99 | 7.30E-01 | 41.69  | 36.74 | 2.57E-01 |
| cg08653904 | 21.99  | 8.24  | 7.61E-03 | 35.04  | 22.92 | 1.26E-01 | -0.39  | 45.35  | 9.93E-01 | 19.53  | 9.37  | 3.72E-02 | 36.63  | 32.25 | 2.56E-01 |
| cg26373134 | 18.26  | 6.84  | 7.61E-03 | 39.23  | 20.26 | 5.28E-02 | -1.85  | 29.04  | 9.49E-01 | 16.24  | 7.88  | 3.94E-02 | 21.33  | 24.51 | 3.84E-01 |
| cg13738327 | -14.26 | 5.34  | 7.61E-03 | -13.24 | 6.87  | 5.39E-02 | -7.30  | 21.02  | 7.28E-01 | -29.43 | 13.61 | 3.06E-02 | -7.03  | 12.73 | 5.81E-01 |
| cg27242132 | 8.05   | 3.02  | 7.62E-03 | 10.17  | 4.98  | 4.11E-02 | 4.06   | 6.14   | 5.09E-01 | 11.19  | 7.18  | 1.19E-01 | 6.33   | 6.50  | 3.30E-01 |
| cg02408850 | 19.95  | 7.48  | 7.62E-03 | 22.60  | 10.95 | 3.91E-02 | 17.90  | 15.23  | 2.40E-01 | 31.04  | 19.29 | 1.08E-01 | 3.12   | 19.77 | 8.75E-01 |
| cg17661135 | -12.22 | 4.58  | 7.62E-03 | -17.04 | 8.16  | 3.67E-02 | -21.29 | 12.20  | 8.10E-02 | -8.45  | 7.36  | 2.51E-01 | -3.68  | 11.59 | 7.51E-01 |
| cg03260991 | 15.17  | 5.68  | 7.62E-03 | 11.61  | 16.33 | 4.77E-01 | 1.90   | 19.39  | 9.22E-01 | 15.38  | 6.62  | 2.02E-02 | 40.79  | 24.17 | 9.15E-02 |
| cg06883279 | -9.91  | 3.71  | 7.62E-03 | -17.16 | 7.06  | 1.51E-02 | -12.36 | 16.35  | 4.50E-01 | -6.81  | 5.04  | 1.76E-01 | -6.42  | 10.33 | 5.34E-01 |
| cg14679444 | -17.27 | 6.47  | 7.62E-03 | -23.32 | 10.91 | 3.25E-02 | 1.76   | 23.93  | 9.41E-01 | -24.54 | 13.96 | 7.87E-02 | -10.87 | 10.79 | 3.14E-01 |
| cg04903759 | 6.84   | 2.56  | 7.62E-03 | 5.67   | 3.49  | 1.05E-01 | 9.82   | 6.94   | 1.57E-01 | 12.34  | 5.85  | 3.49E-02 | 0.58   | 7.01  | 9.34E-01 |
| cg17209280 | -14.78 | 5.54  | 7.63E-03 | -12.75 | 14.86 | 3.91E-01 | -0.71  | 24.89  | 9.77E-01 | -14.51 | 6.49  | 2.54E-02 | -28.82 | 19.16 | 1.32E-01 |
| cg05690069 | 28.66  | 10.74 | 7.63E-03 | 48.07  | 19.84 | 1.54E-02 | -6.59  | 41.38  | 8.73E-01 | 21.39  | 15.40 | 1.65E-01 | 30.14  | 27.49 | 2.73E-01 |
| cg04467093 | 12.84  | 4.81  | 7.64E-03 | 10.44  | 7.29  | 1.52E-01 | 26.82  | 11.95  | 2.48E-02 | 5.21   | 10.96 | 6.35E-01 | 14.06  | 10.54 | 1.82E-01 |
| cg27600265 | 12.71  | 4.77  | 7.65E-03 | 11.16  | 7.12  | 1.17E-01 | 16.31  | 9.85   | 9.78E-02 | 27.58  | 17.99 | 1.25E-01 | 7.92   | 9.57  | 4.08E-01 |
| cg23019936 | 7.62   | 2.86  | 7.65E-03 | 14.07  | 5.54  | 1.12E-02 | 4.63   | 7.97   | 5.61E-01 | 7.04   | 4.22  | 9.48E-02 | 0.35   | 7.48  | 9.63E-01 |
| cg01287514 | 20.27  | 7.60  | 7.65E-03 | 17.82  | 9.16  | 5.17E-02 | -7.92  | 30.27  | 7.93E-01 | 74.48  | 47.18 | 1.14E-01 | 29.45  | 16.09 | 6.71E-02 |
| cg21626886 | 54.98  | 20.62 | 7.65E-03 | 30.65  | 57.52 | 5.94E-01 | 180.96 | 232.29 | 4.36E-01 | 67.84  | 24.26 | 5.17E-03 | 4.48   | 54.80 | 9.35E-01 |
| cg10476260 | -28.87 | 10.82 | 7.65E-03 | -43.05 | 37.96 | 2.57E-01 | 27.14  | 145.58 | 8.52E-01 | -24.31 | 11.85 | 4.02E-02 | -66.67 | 38.64 | 8.45E-02 |
| cg04508739 | 13.70  | 5.14  | 7.65E-03 | 16.97  | 7.43  | 2.24E-02 | 8.22   | 11.59  | 4.78E-01 | 9.23   | 17.31 | 5.94E-01 | 13.32  | 10.54 | 2.06E-01 |
| cg25197880 | 26.44  | 9.91  | 7.65E-03 | 25.59  | 19.55 | 1.90E-01 | 37.34  | 43.44  | 3.90E-01 | 25.48  | 12.86 | 4.75E-02 | 28.70  | 31.91 | 3.68E-01 |
| cg02904062 | -40.25 | 15.09 | 7.66E-03 | -34.31 | 20.04 | 8.68E-02 | 5.27   | 35.87  | 8.83E-01 | -41.77 | 25.29 | 9.86E-02 | -85.51 | 31.14 | 6.03E-03 |
| cg22633819 | 27.75  | 10.41 | 7.66E-03 | 28.83  | 17.54 | 1.00E-01 | 35.81  | 19.61  | 6.78E-02 | 11.23  | 20.68 | 5.87E-01 | 41.26  | 30.94 | 1.82E-01 |
| cg08528000 | -20.56 | 7.71  | 7.67E-03 | -14.39 | 19.86 | 4.69E-01 | 7.63   | 36.72  | 8.35E-01 | -27.57 | 8.91  | 1.97E-03 | 14.44  | 26.71 | 5.89E-01 |
| cg08364970 | -36.06 | 13.52 | 7.67E-03 | -45.70 | 19.26 | 1.76E-02 | -18.48 | 92.48  | 8.42E-01 | -51.52 | 25.00 | 3.94E-02 | 10.05  | 30.77 | 7.44E-01 |
| cg03765543 | 27.82  | 10.44 | 7.67E-03 | 41.67  | 19.05 | 2.87E-02 | 6.44   | 36.34  | 8.59E-01 | 35.66  | 11.46 | 1.85E-03 | -9.79  | 24.98 | 6.95E-01 |
| cg24125269 | -21.24 | 7.97  | 7.68E-03 | -44.66 | 18.92 | 1.82E-02 | 3.01   | 19.89  | 8.80E-01 | -21.17 | 10.50 | 4.39E-02 | -19.13 | 24.86 | 4.42E-01 |
| cg00700455 | -18.88 | 7.08  | 7.68E-03 | -11.41 | 16.51 | 4.90E-01 | -42.05 | 21.55  | 5.11E-02 | -16.85 | 9.27  | 6.91E-02 | -19.35 | 20.08 | 3.35E-01 |
| cg07845011 | 21.83  | 8.19  | 7.68E-03 | 26.47  | 18.01 | 1.42E-01 | -0.18  | 19.85  | 9.93E-01 | 22.72  | 11.12 | 4.10E-02 | 50.64  | 28.94 | 8.01E-02 |
| cg17526887 | -20.21 | 7.58  | 7.68E-03 | -23.60 | 12.41 | 5.72E-02 | 5.99   | 23.83  | 8.02E-01 | -12.97 | 19.75 | 5.11E-01 | -26.67 | 12.32 | 3.04E-02 |
| cg16567087 | 40.68  | 15.26 | 7.68E-03 | 39.88  | 18.87 | 3.46E-02 | 18.37  | 94.16  | 8.45E-01 | -20.44 | 88.03 | 8.16E-01 | 50.86  | 28.36 | 7.29E-02 |
| cg00955547 | -10.70 | 4.01  | 7.68E-03 | -13.79 | 7.61  | 7.00E-02 | -8.65  | 10.19  | 3.96E-01 | -8.85  | 6.22  | 1.55E-01 | -12.21 | 10.35 | 2.38E-01 |

|            |        |       |          |        |       |          |         |        |          |        |       |          |        |       |          |
|------------|--------|-------|----------|--------|-------|----------|---------|--------|----------|--------|-------|----------|--------|-------|----------|
| cg27160284 | 13.54  | 5.08  | 7.69E-03 | 12.37  | 7.39  | 9.41E-02 | 22.32   | 10.51  | 3.37E-02 | 16.39  | 15.12 | 2.78E-01 | 3.48   | 11.95 | 7.71E-01 |
| cg15382538 | 18.86  | 7.08  | 7.69E-03 | 27.34  | 17.68 | 1.22E-01 | 3.65    | 19.72  | 8.53E-01 | 18.34  | 11.60 | 1.14E-01 | 21.21  | 12.16 | 8.11E-02 |
| cg02084485 | -13.25 | 4.97  | 7.69E-03 | -16.44 | 14.44 | 2.55E-01 | -4.90   | 22.84  | 8.30E-01 | -14.45 | 5.91  | 1.45E-02 | -6.69  | 13.99 | 6.33E-01 |
| cg13266951 | 46.67  | 17.51 | 7.69E-03 | 59.50  | 24.03 | 1.33E-02 | 20.41   | 53.38  | 7.02E-01 | 24.21  | 47.43 | 6.10E-01 | 42.59  | 36.89 | 2.48E-01 |
| cg19273253 | 49.99  | 18.76 | 7.69E-03 | 50.67  | 28.78 | 7.83E-02 | 113.32  | 49.33  | 2.16E-02 | 41.72  | 55.60 | 4.53E-01 | 23.15  | 33.32 | 4.87E-01 |
| cg04800681 | 13.58  | 5.09  | 7.70E-03 | 18.10  | 7.35  | 1.37E-02 | 12.85   | 14.56  | 3.77E-01 | 5.85   | 12.23 | 6.32E-01 | 10.24  | 10.79 | 3.43E-01 |
| cg11251728 | -9.56  | 3.59  | 7.70E-03 | -18.42 | 7.35  | 1.22E-02 | -5.67   | 9.81   | 5.63E-01 | -7.95  | 5.44  | 1.44E-01 | -4.93  | 8.18  | 5.47E-01 |
| cg01030121 | 23.53  | 8.83  | 7.71E-03 | 38.97  | 14.77 | 8.32E-03 | 17.64   | 25.05  | 4.81E-01 | 28.27  | 21.86 | 1.96E-01 | 7.87   | 14.82 | 5.96E-01 |
| cg04774364 | -13.89 | 5.21  | 7.71E-03 | -22.43 | 11.21 | 4.55E-02 | -8.43   | 16.16  | 6.02E-01 | -10.92 | 6.73  | 1.04E-01 | -20.21 | 18.50 | 2.75E-01 |
| cg07632771 | -14.26 | 5.35  | 7.72E-03 | -20.88 | 7.95  | 8.60E-03 | -11.93  | 12.58  | 3.43E-01 | -10.38 | 16.27 | 5.23E-01 | -5.85  | 10.56 | 5.80E-01 |
| cg02824817 | -16.22 | 6.09  | 7.72E-03 | -32.48 | 15.60 | 3.74E-02 | -16.56  | 26.66  | 5.35E-01 | -10.08 | 6.18  | 1.03E-01 | -36.98 | 19.27 | 5.50E-02 |
| cg14169886 | -13.93 | 5.23  | 7.72E-03 | -18.41 | 8.85  | 3.74E-02 | -11.67  | 11.36  | 3.04E-01 | -7.06  | 10.86 | 5.16E-01 | -16.35 | 11.48 | 1.54E-01 |
| cg13600314 | -11.72 | 4.40  | 7.72E-03 | -22.58 | 11.29 | 4.54E-02 | -24.25  | 19.56  | 2.15E-01 | -6.65  | 5.32  | 2.12E-01 | -22.03 | 13.00 | 9.03E-02 |
| cg13826452 | 12.62  | 4.74  | 7.72E-03 | 13.44  | 7.19  | 6.15E-02 | 9.07    | 10.95  | 4.07E-01 | 17.23  | 11.27 | 1.26E-01 | 10.12  | 10.57 | 3.38E-01 |
| cg02823066 | -12.70 | 4.77  | 7.73E-03 | -10.32 | 7.93  | 1.93E-01 | -3.32   | 10.18  | 7.45E-01 | -19.43 | 9.75  | 4.63E-02 | -19.99 | 11.24 | 7.53E-02 |
| cg23021796 | 18.04  | 6.77  | 7.73E-03 | 25.71  | 9.06  | 4.56E-03 | 4.42    | 19.53  | 8.21E-01 | 6.59   | 28.93 | 8.20E-01 | 10.48  | 13.12 | 4.24E-01 |
| cg01125010 | 13.37  | 5.02  | 7.73E-03 | 16.00  | 7.15  | 2.52E-02 | 25.15   | 11.37  | 2.70E-02 | 0.81   | 14.25 | 9.54E-01 | 2.56   | 11.58 | 8.25E-01 |
| cg18449135 | -13.09 | 4.91  | 7.74E-03 | -17.82 | 14.48 | 2.19E-01 | -28.95  | 19.95  | 1.47E-01 | -8.99  | 5.71  | 1.15E-01 | -31.54 | 17.06 | 6.45E-02 |
| cg03906033 | 17.36  | 6.52  | 7.74E-03 | 27.49  | 20.84 | 1.87E-01 | 69.00   | 66.80  | 3.02E-01 | 16.91  | 7.17  | 1.83E-02 | 0.36   | 25.48 | 9.89E-01 |
| cg27273675 | 14.12  | 5.30  | 7.75E-03 | 15.15  | 8.53  | 7.57E-02 | 7.35    | 13.10  | 5.75E-01 | 19.08  | 9.95  | 5.53E-02 | 9.94   | 13.04 | 4.46E-01 |
| cg14312063 | 7.84   | 2.94  | 7.75E-03 | 6.65   | 5.21  | 2.02E-01 | 8.14    | 6.07   | 1.80E-01 | 4.08   | 5.16  | 4.29E-01 | 20.56  | 8.48  | 1.54E-02 |
| cg19834045 | -11.82 | 4.44  | 7.75E-03 | -20.17 | 8.68  | 2.01E-02 | -3.18   | 12.27  | 7.95E-01 | -9.14  | 6.70  | 1.72E-01 | -12.59 | 10.86 | 2.47E-01 |
| cg12633355 | 18.12  | 6.81  | 7.76E-03 | 24.83  | 16.32 | 1.28E-01 | 30.02   | 35.47  | 3.97E-01 | 13.78  | 8.00  | 8.50E-02 | 41.69  | 26.63 | 1.17E-01 |
| cg12503292 | -34.29 | 12.88 | 7.76E-03 | -32.46 | 14.33 | 2.35E-02 | -145.03 | 87.37  | 9.69E-02 | 18.96  | 63.83 | 7.66E-01 | -43.84 | 35.74 | 2.20E-01 |
| cg00530015 | -10.84 | 4.07  | 7.77E-03 | -12.98 | 8.08  | 1.08E-01 | -15.36  | 14.14  | 2.77E-01 | -10.47 | 5.76  | 6.92E-02 | -6.35  | 10.08 | 5.29E-01 |
| cg16686960 | -17.65 | 6.63  | 7.77E-03 | -24.96 | 11.06 | 2.40E-02 | -8.62   | 14.96  | 5.64E-01 | -28.52 | 16.54 | 8.46E-02 | -8.47  | 12.45 | 4.96E-01 |
| cg19691505 | -12.62 | 4.74  | 7.77E-03 | -13.37 | 8.52  | 1.17E-01 | -0.16   | 11.53  | 9.89E-01 | -16.94 | 8.09  | 3.62E-02 | -14.85 | 11.26 | 1.87E-01 |
| cg10676472 | -21.62 | 8.12  | 7.77E-03 | -39.81 | 18.95 | 3.56E-02 | 18.42   | 34.69  | 5.95E-01 | -18.43 | 9.89  | 6.25E-02 | -32.99 | 27.42 | 2.29E-01 |
| cg06281297 | 19.38  | 7.28  | 7.77E-03 | 18.53  | 11.01 | 9.24E-02 | -1.41   | 21.78  | 9.48E-01 | 40.93  | 21.27 | 5.43E-02 | 19.89  | 12.60 | 1.15E-01 |
| cg26332560 | 21.68  | 8.15  | 7.78E-03 | 27.36  | 13.38 | 4.09E-02 | 15.46   | 21.93  | 4.81E-01 | 16.52  | 16.74 | 3.24E-01 | 21.58  | 16.14 | 1.81E-01 |
| cg13670911 | 36.07  | 13.55 | 7.78E-03 | -14.07 | 45.61 | 7.58E-01 | -70.73  | 165.65 | 6.69E-01 | 43.10  | 14.78 | 3.55E-03 | 24.19  | 53.59 | 6.52E-01 |
| cg25983553 | 27.21  | 10.23 | 7.79E-03 | 35.08  | 13.81 | 1.11E-02 | 24.19   | 27.67  | 3.82E-01 | 14.35  | 33.58 | 6.69E-01 | 15.03  | 21.68 | 4.88E-01 |
| cg16759218 | -18.02 | 6.77  | 7.79E-03 | -26.25 | 14.88 | 7.78E-02 | 23.91   | 27.31  | 3.81E-01 | -21.47 | 7.52  | 4.29E-03 | -6.42  | 20.13 | 7.50E-01 |
| cg09246897 | -9.58  | 3.60  | 7.79E-03 | -7.93  | 7.84  | 3.12E-01 | -5.18   | 12.74  | 6.84E-01 | -8.14  | 4.65  | 8.01E-02 | -23.51 | 10.77 | 2.91E-02 |
| cg09848096 | 18.94  | 7.12  | 7.80E-03 | 30.28  | 20.20 | 1.34E-01 | -39.35  | 35.95  | 2.74E-01 | 20.29  | 8.36  | 1.52E-02 | 18.00  | 21.29 | 3.98E-01 |

|            |        |       |          |         |       |          |         |        |          |         |       |          |        |       |          |
|------------|--------|-------|----------|---------|-------|----------|---------|--------|----------|---------|-------|----------|--------|-------|----------|
| cg20428133 | 20.27  | 7.62  | 7.80E-03 | 9.91    | 15.34 | 5.18E-01 | 28.33   | 14.13  | 4.50E-02 | 18.24   | 13.20 | 1.67E-01 | 27.18  | 21.20 | 2.00E-01 |
| cg02341197 | 9.08   | 3.41  | 7.80E-03 | 7.06    | 4.77  | 1.39E-01 | 16.65   | 7.27   | 2.19E-02 | 7.12    | 10.97 | 5.16E-01 | 6.48   | 8.28  | 4.34E-01 |
| cg00561891 | -75.25 | 28.29 | 7.81E-03 | -109.39 | 35.77 | 2.23E-03 | 35.49   | 102.35 | 7.29E-01 | -105.41 | 46.05 | 2.21E-02 | -16.30 | 50.79 | 7.48E-01 |
| cg09807315 | 26.39  | 9.92  | 7.81E-03 | 43.40   | 18.45 | 1.86E-02 | 17.43   | 18.63  | 3.50E-01 | 14.70   | 20.29 | 4.69E-01 | 28.63  | 22.89 | 2.11E-01 |
| cg08836353 | 13.21  | 4.97  | 7.81E-03 | 22.21   | 7.48  | 2.97E-03 | 9.20    | 10.90  | 3.98E-01 | -2.33   | 15.55 | 8.81E-01 | 6.98   | 9.94  | 4.83E-01 |
| cg27565473 | -10.31 | 3.87  | 7.81E-03 | -8.71   | 5.94  | 1.42E-01 | -17.20  | 8.11   | 3.39E-02 | -4.84   | 12.27 | 6.93E-01 | -8.87  | 7.81  | 2.56E-01 |
| cg03962691 | 20.64  | 7.76  | 7.82E-03 | 34.41   | 9.32  | 2.24E-04 | 19.13   | 16.08  | 2.34E-01 | 23.11   | 14.80 | 1.18E-01 | 2.80   | 11.31 | 8.04E-01 |
| cg23925201 | -16.31 | 6.13  | 7.82E-03 | -19.54  | 9.88  | 4.79E-02 | -10.07  | 14.31  | 4.82E-01 | -15.13  | 13.89 | 2.76E-01 | -16.86 | 12.62 | 1.81E-01 |
| cg14777244 | 21.28  | 8.00  | 7.82E-03 | 7.20    | 13.08 | 5.82E-01 | 32.88   | 14.19  | 2.05E-02 | 33.27   | 19.90 | 9.46E-02 | 18.85  | 20.90 | 3.67E-01 |
| cg01655355 | 44.44  | 16.71 | 7.83E-03 | 44.55   | 20.50 | 2.98E-02 | -34.14  | 75.46  | 6.51E-01 | 13.17   | 36.20 | 7.16E-01 | 82.82  | 31.07 | 7.69E-03 |
| cg15295732 | -6.95  | 2.61  | 7.83E-03 | -2.47   | 3.87  | 5.23E-01 | -10.22  | 5.96   | 8.65E-02 | -8.64   | 6.79  | 2.03E-01 | -12.69 | 5.80  | 2.87E-02 |
| cg06770532 | -17.32 | 6.51  | 7.83E-03 | -25.18  | 9.16  | 5.98E-03 | -22.51  | 12.88  | 8.04E-02 | -21.10  | 14.52 | 1.46E-01 | 2.69   | 12.24 | 8.26E-01 |
| cg09547219 | -46.39 | 17.44 | 7.83E-03 | -45.46  | 21.73 | 3.64E-02 | -139.36 | 101.94 | 1.72E-01 | -25.12  | 93.05 | 7.87E-01 | -41.65 | 32.33 | 1.98E-01 |
| cg18986154 | -21.97 | 8.26  | 7.84E-03 | -11.19  | 26.19 | 6.69E-01 | -42.21  | 122.35 | 7.30E-01 | -22.39  | 8.99  | 1.28E-02 | -34.14 | 36.41 | 3.48E-01 |
| cg03115470 | 17.79  | 6.69  | 7.84E-03 | 16.61   | 10.32 | 1.07E-01 | 11.42   | 12.53  | 3.62E-01 | 10.28   | 17.18 | 5.50E-01 | 41.98  | 17.71 | 1.78E-02 |
| cg24100636 | 17.47  | 6.57  | 7.84E-03 | 28.95   | 12.03 | 1.61E-02 | -2.16   | 17.07  | 8.99E-01 | 25.56   | 11.89 | 3.15E-02 | 9.06   | 11.22 | 4.19E-01 |
| cg19176696 | 38.20  | 14.37 | 7.84E-03 | 27.26   | 19.96 | 1.72E-01 | 31.96   | 19.31  | 9.78E-02 | 17.76   | 19.04 | 3.51E-01 | 92.71  | 26.74 | 5.27E-04 |
| cg04449108 | -33.54 | 12.62 | 7.84E-03 | -19.12  | 23.47 | 4.15E-01 | -81.68  | 61.98  | 1.88E-01 | -39.84  | 17.17 | 2.04E-02 | -24.12 | 34.97 | 4.90E-01 |
| cg09815911 | 43.78  | 16.47 | 7.85E-03 | 27.82   | 31.95 | 3.84E-01 | -52.39  | 210.93 | 8.04E-01 | 55.18   | 20.95 | 8.43E-03 | 23.65  | 49.56 | 6.33E-01 |
| cg05389024 | -12.62 | 4.75  | 7.85E-03 | -7.38   | 10.26 | 4.72E-01 | -2.98   | 22.72  | 8.96E-01 | -14.38  | 5.80  | 1.31E-02 | -17.63 | 17.69 | 3.19E-01 |
| cg04966888 | 26.83  | 10.09 | 7.85E-03 | 19.83   | 14.96 | 1.85E-01 | 40.24   | 23.00  | 8.01E-02 | 20.45   | 27.47 | 4.57E-01 | 33.53  | 21.63 | 1.21E-01 |
| cg23940467 | -40.57 | 15.26 | 7.85E-03 | -9.37   | 49.87 | 8.51E-01 | -204.10 | 195.81 | 2.97E-01 | -41.37  | 16.69 | 1.32E-02 | -60.12 | 60.12 | 3.17E-01 |
| cg18726079 | -14.21 | 5.35  | 7.85E-03 | -21.83  | 13.42 | 1.04E-01 | -8.16   | 23.90  | 7.33E-01 | -11.11  | 6.41  | 8.30E-02 | -27.23 | 17.27 | 1.15E-01 |
| cg25287198 | 9.96   | 3.75  | 7.86E-03 | 6.11    | 4.67  | 1.91E-01 | 17.02   | 6.67   | 1.07E-02 | 22.69   | 11.86 | 5.58E-02 | 3.74   | 7.54  | 6.20E-01 |
| cg26545143 | 17.20  | 6.47  | 7.86E-03 | 28.25   | 14.58 | 5.26E-02 | 31.37   | 33.18  | 3.44E-01 | 10.14   | 8.87  | 2.53E-01 | 21.65  | 13.40 | 1.06E-01 |
| cg14685948 | -18.25 | 6.87  | 7.87E-03 | -18.45  | 9.81  | 5.98E-02 | -20.28  | 16.56  | 2.21E-01 | -5.86   | 18.29 | 7.49E-01 | -24.84 | 15.48 | 1.09E-01 |
| cg26249100 | 15.73  | 5.92  | 7.87E-03 | 26.28   | 14.94 | 7.85E-02 | 9.12    | 18.47  | 6.22E-01 | 13.04   | 7.15  | 6.80E-02 | 31.49  | 25.32 | 2.14E-01 |
| cg06747432 | 23.67  | 8.91  | 7.87E-03 | 50.87   | 35.60 | 1.53E-01 | 27.57   | 150.83 | 8.55E-01 | 23.35   | 9.47  | 1.37E-02 | -5.55  | 40.32 | 8.91E-01 |
| cg05392265 | 15.99  | 6.02  | 7.87E-03 | 16.00   | 9.78  | 1.02E-01 | 13.94   | 13.72  | 3.10E-01 | 18.42   | 12.75 | 1.48E-01 | 15.25  | 13.25 | 2.50E-01 |
| cg13644715 | 20.09  | 7.56  | 7.89E-03 | 28.31   | 12.05 | 1.88E-02 | 5.49    | 14.28  | 7.01E-01 | 15.82   | 17.00 | 3.52E-01 | 33.39  | 21.16 | 1.15E-01 |
| cg17853642 | 12.28  | 4.62  | 7.89E-03 | 18.62   | 6.97  | 7.57E-03 | 5.46    | 10.67  | 6.09E-01 | 12.31   | 10.77 | 2.53E-01 | 4.27   | 10.64 | 6.88E-01 |
| cg03431155 | 17.44  | 6.56  | 7.89E-03 | 13.94   | 17.29 | 4.20E-01 | 27.95   | 22.67  | 2.18E-01 | 16.70   | 7.75  | 3.12E-02 | 20.07  | 27.80 | 4.70E-01 |
| cg02541210 | 30.91  | 11.63 | 7.89E-03 | 52.69   | 17.91 | 3.25E-03 | 36.37   | 19.48  | 6.19E-02 | 24.01   | 19.24 | 2.12E-01 | -10.36 | 27.83 | 7.10E-01 |
| cg09645699 | 19.87  | 7.48  | 7.89E-03 | 31.48   | 20.41 | 1.23E-01 | 10.25   | 21.89  | 6.40E-01 | 16.90   | 9.04  | 6.16E-02 | 44.40  | 29.33 | 1.30E-01 |
| cg14948822 | -15.00 | 5.64  | 7.89E-03 | -18.10  | 14.13 | 2.00E-01 | -10.52  | 25.79  | 6.83E-01 | -15.29  | 6.69  | 2.24E-02 | -8.96  | 19.76 | 6.50E-01 |

|            |        |       |          |        |       |          |        |        |          |        |       |          |         |       |          |
|------------|--------|-------|----------|--------|-------|----------|--------|--------|----------|--------|-------|----------|---------|-------|----------|
| cg22572476 | -5.52  | 2.08  | 7.89E-03 | -5.78  | 2.59  | 2.59E-02 | -4.66  | 4.31   | 2.80E-01 | -13.34 | 5.17  | 9.88E-03 | -1.01   | 3.86  | 7.94E-01 |
| cg01145396 | 20.41  | 7.68  | 7.90E-03 | 19.67  | 12.95 | 1.29E-01 | 42.32  | 16.43  | 1.00E-02 | 6.25   | 14.07 | 6.57E-01 | 18.09   | 21.22 | 3.94E-01 |
| cg22860172 | 16.21  | 6.10  | 7.90E-03 | 19.50  | 8.71  | 2.52E-02 | 14.16  | 12.52  | 2.58E-01 | 28.51  | 19.57 | 1.45E-01 | 2.88    | 14.61 | 8.44E-01 |
| cg13713821 | -10.35 | 3.90  | 7.90E-03 | -13.01 | 8.40  | 1.21E-01 | -6.40  | 10.50  | 5.42E-01 | -12.01 | 5.80  | 3.84E-02 | -6.38   | 8.81  | 4.69E-01 |
| cg15714041 | -56.37 | 21.22 | 7.90E-03 | -50.75 | 24.67 | 3.97E-02 | -71.42 | 106.52 | 5.03E-01 | 0.31   | 69.71 | 9.97E-01 | -125.48 | 59.42 | 3.47E-02 |
| cg05872923 | 8.07   | 3.04  | 7.91E-03 | 7.86   | 3.84  | 4.08E-02 | 7.33   | 7.23   | 3.11E-01 | 0.34   | 14.75 | 9.81E-01 | 11.88   | 7.71  | 1.23E-01 |
| cg02282774 | 22.73  | 8.56  | 7.91E-03 | 20.77  | 10.62 | 5.06E-02 | 54.50  | 29.61  | 6.56E-02 | 5.33   | 35.59 | 8.81E-01 | 20.95   | 18.71 | 2.63E-01 |
| cg13477182 | -35.95 | 13.54 | 7.91E-03 | -25.53 | 38.02 | 5.02E-01 | 38.01  | 202.77 | 8.51E-01 | -40.97 | 15.08 | 6.60E-03 | 1.97    | 53.90 | 9.71E-01 |
| cg16437021 | 10.43  | 3.93  | 7.92E-03 | 12.08  | 5.82  | 3.79E-02 | 14.47  | 8.87   | 1.03E-01 | 9.46   | 9.09  | 2.98E-01 | 2.00    | 9.75  | 8.38E-01 |
| cg07529715 | -8.94  | 3.37  | 7.92E-03 | -11.51 | 5.33  | 3.09E-02 | -2.32  | 8.45   | 7.83E-01 | 0.38   | 9.13  | 9.67E-01 | -13.17  | 6.09  | 3.04E-02 |
| cg18259342 | 8.15   | 3.07  | 7.92E-03 | 8.26   | 3.96  | 3.70E-02 | 1.52   | 6.93   | 8.27E-01 | 15.21  | 15.96 | 3.41E-01 | 14.13   | 7.57  | 6.22E-02 |
| cg20300500 | -15.16 | 5.71  | 7.92E-03 | -17.93 | 8.51  | 3.52E-02 | -7.89  | 13.02  | 5.44E-01 | -24.19 | 16.19 | 1.35E-01 | -11.01  | 11.81 | 3.51E-01 |
| cg01411921 | 17.54  | 6.61  | 7.93E-03 | 21.74  | 8.15  | 7.61E-03 | 28.89  | 23.31  | 2.15E-01 | -11.38 | 38.93 | 7.70E-01 | 5.35    | 13.70 | 6.96E-01 |
| cg23610453 | 20.45  | 7.70  | 7.93E-03 | 37.65  | 15.03 | 1.22E-02 | 7.47   | 18.90  | 6.93E-01 | 11.81  | 13.35 | 3.76E-01 | 22.59   | 15.76 | 1.52E-01 |
| cg27441225 | 18.02  | 6.79  | 7.93E-03 | -0.36  | 17.74 | 9.84E-01 | 18.29  | 61.40  | 7.66E-01 | 24.09  | 7.72  | 1.81E-03 | -11.02  | 25.88 | 6.70E-01 |
| cg08084339 | -8.80  | 3.32  | 7.93E-03 | -6.55  | 6.09  | 2.82E-01 | -3.99  | 9.75   | 6.83E-01 | -7.70  | 4.61  | 9.48E-02 | -25.23  | 10.13 | 1.28E-02 |
| cg23636324 | 31.10  | 11.72 | 7.94E-03 | 32.71  | 36.83 | 3.74E-01 | 68.13  | 112.12 | 5.43E-01 | 29.85  | 13.12 | 2.29E-02 | 35.88   | 38.93 | 3.57E-01 |
| cg12537405 | 4.29   | 1.62  | 7.94E-03 | 3.34   | 2.10  | 1.11E-01 | 5.40   | 3.32   | 1.04E-01 | -3.12  | 5.66  | 5.82E-01 | 8.00    | 3.32  | 1.58E-02 |
| cg10300188 | 9.59   | 3.61  | 7.94E-03 | 6.52   | 5.16  | 2.06E-01 | 16.39  | 8.91   | 6.59E-02 | 16.05  | 8.98  | 7.38E-02 | 6.01    | 8.46  | 4.78E-01 |
| cg02081019 | 22.78  | 8.58  | 7.95E-03 | 59.03  | 26.99 | 2.88E-02 | 21.18  | 74.25  | 7.75E-01 | 18.52  | 9.58  | 5.34E-02 | 20.13   | 29.71 | 4.98E-01 |
| cg09221932 | 44.55  | 16.79 | 7.95E-03 | 55.63  | 21.41 | 9.38E-03 | -54.20 | 77.83  | 4.86E-01 | 48.01  | 56.88 | 3.99E-01 | 34.58   | 33.46 | 3.01E-01 |
| cg07207286 | 25.92  | 9.77  | 7.95E-03 | -1.96  | 27.29 | 9.43E-01 | -18.63 | 95.91  | 8.46E-01 | 27.13  | 11.03 | 1.39E-02 | 65.74   | 35.08 | 6.09E-02 |
| cg12551957 | -12.46 | 4.70  | 7.96E-03 | -15.64 | 6.57  | 1.73E-02 | -19.10 | 11.51  | 9.72E-02 | -10.95 | 14.14 | 4.39E-01 | -0.39   | 10.19 | 9.69E-01 |
| cg07959068 | 19.12  | 7.20  | 7.96E-03 | 3.03   | 19.20 | 8.75E-01 | 17.94  | 25.40  | 4.80E-01 | 22.11  | 8.43  | 8.69E-03 | 22.69   | 32.90 | 4.90E-01 |
| cg18949666 | 8.87   | 3.34  | 7.97E-03 | 9.39   | 4.58  | 4.02E-02 | 13.08  | 7.26   | 7.17E-02 | 10.70  | 10.59 | 3.12E-01 | 0.15    | 8.50  | 9.86E-01 |
| cg15302350 | -12.69 | 4.78  | 7.97E-03 | -19.89 | 7.55  | 8.45E-03 | -9.14  | 12.74  | 4.73E-01 | -12.69 | 12.79 | 3.21E-01 | -5.19   | 8.48  | 5.40E-01 |
| cg20649017 | 18.19  | 6.86  | 7.97E-03 | 25.82  | 13.45 | 5.49E-02 | 24.63  | 18.91  | 1.93E-01 | 12.14  | 11.10 | 2.74E-01 | 15.90   | 14.38 | 2.69E-01 |
| cg24921186 | 13.91  | 5.24  | 7.97E-03 | 2.79   | 12.26 | 8.20E-01 | -4.42  | 32.01  | 8.90E-01 | 16.70  | 6.11  | 6.30E-03 | 22.36   | 22.25 | 3.15E-01 |
| cg00030423 | 32.42  | 12.22 | 7.97E-03 | 29.30  | 46.49 | 5.28E-01 | 56.13  | 203.62 | 7.83E-01 | 33.22  | 13.07 | 1.11E-02 | 21.88   | 52.87 | 6.79E-01 |
| cg13355704 | 15.97  | 6.02  | 7.98E-03 | 16.49  | 8.01  | 3.97E-02 | 31.75  | 15.59  | 4.17E-02 | 7.70   | 21.99 | 7.26E-01 | 6.41    | 13.10 | 6.25E-01 |
| cg17621580 | 22.75  | 8.58  | 7.98E-03 | 25.20  | 12.73 | 4.78E-02 | 18.31  | 18.90  | 3.33E-01 | 20.52  | 20.32 | 3.12E-01 | 23.99   | 21.28 | 2.60E-01 |
| cg27157575 | 23.25  | 8.76  | 7.98E-03 | 9.61   | 15.72 | 5.41E-01 | 5.60   | 20.56  | 7.85E-01 | 40.76  | 15.51 | 8.59E-03 | 33.09   | 20.16 | 1.01E-01 |
| cg09832551 | 37.79  | 14.25 | 7.98E-03 | 36.77  | 40.85 | 3.68E-01 | 79.47  | 197.46 | 6.87E-01 | 44.62  | 16.22 | 5.94E-03 | -14.96  | 44.70 | 7.38E-01 |
| cg01196744 | -31.65 | 11.93 | 7.98E-03 | -47.41 | 20.50 | 2.07E-02 | -1.84  | 30.97  | 9.53E-01 | -31.67 | 23.78 | 1.83E-01 | -28.13  | 23.35 | 2.28E-01 |
| cg09597638 | 7.92   | 2.99  | 7.98E-03 | 7.98   | 3.74  | 3.27E-02 | 7.77   | 7.10   | 2.74E-01 | 11.58  | 10.35 | 2.63E-01 | 4.80    | 9.41  | 6.10E-01 |

|            |        |       |          |        |       |          |         |        |          |        |       |          |        |       |          |
|------------|--------|-------|----------|--------|-------|----------|---------|--------|----------|--------|-------|----------|--------|-------|----------|
| cg27341636 | -5.33  | 2.01  | 7.99E-03 | -5.33  | 3.32  | 1.09E-01 | -4.49   | 4.60   | 3.29E-01 | -7.25  | 3.77  | 5.43E-02 | -2.91  | 5.06  | 5.65E-01 |
| cg08635931 | 18.77  | 7.08  | 7.99E-03 | 16.53  | 8.59  | 5.42E-02 | 60.12   | 43.63  | 1.68E-01 | 38.39  | 29.71 | 1.96E-01 | 15.93  | 14.52 | 2.73E-01 |
| cg20621765 | -12.20 | 4.60  | 7.99E-03 | -15.43 | 10.06 | 1.25E-01 | -29.48  | 18.48  | 1.11E-01 | -9.80  | 5.83  | 9.24E-02 | -9.84  | 14.19 | 4.88E-01 |
| cg00449728 | -10.73 | 4.05  | 7.99E-03 | -16.12 | 10.94 | 1.41E-01 | -31.25  | 19.55  | 1.10E-01 | -8.38  | 4.70  | 7.48E-02 | -12.33 | 14.33 | 3.89E-01 |
| cg27280396 | 15.42  | 5.81  | 8.00E-03 | 15.26  | 7.80  | 5.05E-02 | 14.23   | 28.20  | 6.14E-01 | 20.01  | 13.66 | 1.43E-01 | 12.30  | 12.36 | 3.20E-01 |
| cg05046721 | -9.48  | 3.57  | 8.00E-03 | -12.07 | 8.93  | 1.77E-01 | -10.57  | 13.14  | 4.21E-01 | -9.33  | 4.47  | 3.69E-02 | -6.33  | 10.08 | 5.30E-01 |
| cg01313977 | 24.12  | 9.09  | 8.01E-03 | 36.20  | 16.99 | 3.31E-02 | 6.76    | 27.19  | 8.04E-01 | 34.09  | 15.16 | 2.45E-02 | 2.97   | 18.50 | 8.72E-01 |
| cg13363640 | 15.39  | 5.80  | 8.01E-03 | 14.77  | 12.04 | 2.20E-01 | -9.97   | 26.01  | 7.01E-01 | 17.95  | 7.66  | 1.91E-02 | 14.93  | 15.28 | 3.28E-01 |
| cg15843825 | -14.71 | 5.55  | 8.02E-03 | -21.74 | 8.11  | 7.32E-03 | -8.71   | 14.25  | 5.41E-01 | 7.08   | 15.36 | 6.45E-01 | -16.56 | 11.11 | 1.36E-01 |
| cg04599403 | 21.75  | 8.20  | 8.02E-03 | 33.63  | 12.72 | 8.18E-03 | 23.96   | 20.72  | 2.48E-01 | 36.48  | 25.68 | 1.55E-01 | 3.22   | 13.51 | 8.12E-01 |
| cg08750510 | -6.38  | 2.41  | 8.02E-03 | -6.37  | 4.18  | 1.28E-01 | -10.03  | 6.09   | 9.99E-02 | -4.05  | 3.97  | 3.07E-01 | -8.45  | 6.36  | 1.84E-01 |
| cg13331691 | -24.77 | 9.35  | 8.03E-03 | -9.22  | 16.59 | 5.78E-01 | -5.96   | 34.91  | 8.64E-01 | -36.66 | 13.54 | 6.79E-03 | -29.41 | 25.46 | 2.48E-01 |
| cg00228891 | -11.75 | 4.43  | 8.03E-03 | -16.45 | 6.65  | 1.34E-02 | -0.98   | 9.56   | 9.19E-01 | -22.11 | 11.35 | 5.14E-02 | -5.27  | 9.77  | 5.90E-01 |
| cg23692680 | 20.32  | 7.66  | 8.03E-03 | 29.78  | 19.42 | 1.25E-01 | 37.72   | 41.97  | 3.69E-01 | 14.75  | 8.86  | 9.60E-02 | 54.36  | 30.73 | 7.68E-02 |
| cg18382341 | -67.07 | 25.30 | 8.04E-03 | -22.53 | 54.60 | 6.80E-01 | -247.57 | 206.51 | 2.31E-01 | -73.11 | 31.93 | 2.20E-02 | -88.62 | 67.11 | 1.87E-01 |
| cg25806932 | -9.03  | 3.41  | 8.04E-03 | -14.61 | 6.13  | 1.72E-02 | -12.80  | 9.21   | 1.65E-01 | -7.04  | 5.39  | 1.91E-01 | 0.31   | 8.66  | 9.72E-01 |
| cg23277389 | -22.32 | 8.42  | 8.04E-03 | -23.75 | 13.04 | 6.86E-02 | -32.30  | 20.73  | 1.19E-01 | -24.43 | 17.41 | 1.61E-01 | -7.46  | 19.65 | 7.04E-01 |
| cg15717558 | 32.91  | 12.42 | 8.04E-03 | 29.03  | 13.38 | 3.00E-02 | 55.08   | 77.29  | 4.76E-01 | 132.48 | 91.31 | 1.47E-01 | 42.72  | 40.42 | 2.91E-01 |
| cg08457158 | -14.31 | 5.40  | 8.05E-03 | -19.90 | 7.33  | 6.61E-03 | -16.92  | 14.99  | 2.59E-01 | -7.07  | 15.53 | 6.49E-01 | -2.18  | 11.90 | 8.54E-01 |
| cg21584710 | 18.80  | 7.09  | 8.05E-03 | 32.09  | 11.35 | 4.69E-03 | 11.18   | 13.78  | 4.17E-01 | -1.13  | 17.71 | 9.49E-01 | 18.92  | 16.55 | 2.53E-01 |
| cg02144516 | 14.39  | 5.43  | 8.05E-03 | 17.67  | 7.63  | 2.06E-02 | 20.18   | 11.60  | 8.18E-02 | 19.33  | 16.88 | 2.52E-01 | -5.69  | 13.12 | 6.64E-01 |
| cg06217267 | 15.24  | 5.75  | 8.05E-03 | 27.94  | 13.76 | 4.23E-02 | 13.12   | 11.14  | 2.39E-01 | 15.41  | 8.15  | 5.87E-02 | -13.13 | 23.21 | 5.72E-01 |
| cg01381934 | 8.25   | 3.11  | 8.05E-03 | 7.93   | 4.14  | 5.54E-02 | 12.25   | 6.74   | 6.89E-02 | 20.62  | 12.22 | 9.15E-02 | -1.26  | 7.91  | 8.74E-01 |
| cg12267786 | -32.71 | 12.34 | 8.05E-03 | -36.13 | 17.23 | 3.60E-02 | 10.94   | 40.58  | 7.87E-01 | -20.09 | 27.39 | 4.63E-01 | -58.03 | 28.22 | 3.97E-02 |
| cg03044471 | 18.52  | 6.99  | 8.05E-03 | 15.24  | 9.22  | 9.83E-02 | 41.72   | 15.85  | 8.48E-03 | 3.77   | 27.75 | 8.92E-01 | 8.42   | 17.09 | 6.22E-01 |
| cg07117402 | 18.73  | 7.07  | 8.05E-03 | 11.21  | 20.75 | 5.89E-01 | 40.86   | 23.94  | 8.78E-02 | 15.28  | 8.34  | 6.71E-02 | 36.65  | 25.12 | 1.45E-01 |
| cg12107247 | -12.33 | 4.65  | 8.05E-03 | -21.20 | 10.66 | 4.67E-02 | -3.58   | 12.81  | 7.80E-01 | -13.97 | 6.57  | 3.34E-02 | -4.57  | 11.13 | 6.81E-01 |
| cg07477602 | 7.68   | 2.90  | 8.05E-03 | 8.48   | 3.90  | 2.95E-02 | 10.45   | 7.76   | 1.78E-01 | 9.12   | 8.24  | 2.68E-01 | 2.19   | 6.78  | 7.47E-01 |
| cg14456034 | -30.75 | 11.61 | 8.06E-03 | -35.40 | 20.31 | 8.14E-02 | -14.70  | 45.03  | 7.44E-01 | -29.07 | 16.93 | 8.59E-02 | -33.23 | 31.34 | 2.89E-01 |
| cg20544552 | -6.24  | 2.36  | 8.06E-03 | -6.11  | 3.35  | 6.81E-02 | -9.93   | 5.16   | 5.42E-02 | 4.63   | 12.30 | 7.07E-01 | -5.07  | 4.62  | 2.72E-01 |
| cg14074486 | 16.38  | 6.18  | 8.06E-03 | 17.42  | 9.40  | 6.37E-02 | 25.96   | 13.82  | 6.03E-02 | 5.08   | 13.54 | 7.08E-01 | 16.29  | 15.52 | 2.94E-01 |
| cg21892295 | 8.02   | 3.03  | 8.06E-03 | 11.61  | 4.12  | 4.86E-03 | 2.57    | 7.36   | 7.27E-01 | 10.26  | 7.62  | 1.78E-01 | -2.27  | 8.31  | 7.85E-01 |
| cg15082992 | -8.85  | 3.34  | 8.07E-03 | -7.09  | 5.91  | 2.31E-01 | -11.00  | 6.70   | 1.01E-01 | -8.21  | 7.10  | 2.47E-01 | -9.66  | 7.28  | 1.84E-01 |
| cg08698477 | -19.72 | 7.44  | 8.07E-03 | -22.14 | 15.91 | 1.64E-01 | -32.95  | 19.49  | 9.10E-02 | -19.14 | 10.26 | 6.21E-02 | 0.02   | 22.54 | 9.99E-01 |
| cg20837456 | 10.68  | 4.03  | 8.07E-03 | 17.93  | 10.80 | 9.68E-02 | 11.43   | 25.23  | 6.51E-01 | 11.35  | 4.64  | 1.45E-02 | -8.26  | 14.18 | 5.60E-01 |

|            |        |       |          |        |       |          |         |        |          |        |       |          |        |       |          |
|------------|--------|-------|----------|--------|-------|----------|---------|--------|----------|--------|-------|----------|--------|-------|----------|
| cg01477861 | -7.73  | 2.92  | 8.07E-03 | -7.70  | 4.10  | 6.00E-02 | -11.54  | 6.00   | 5.45E-02 | 2.44   | 10.75 | 8.20E-01 | -6.96  | 6.82  | 3.08E-01 |
| cg10301588 | 20.52  | 7.75  | 8.08E-03 | 25.74  | 14.93 | 8.48E-02 | 13.30   | 12.88  | 3.02E-01 | 13.85  | 16.07 | 3.89E-01 | 40.58  | 20.91 | 5.23E-02 |
| cg10111335 | -11.02 | 4.16  | 8.08E-03 | -15.02 | 6.54  | 2.16E-02 | -10.71  | 10.74  | 3.19E-01 | -1.48  | 8.60  | 8.64E-01 | -14.12 | 9.05  | 1.19E-01 |
| cg22541001 | -9.35  | 3.53  | 8.08E-03 | -10.89 | 4.48  | 1.51E-02 | 0.74    | 6.86   | 9.14E-01 | -19.97 | 9.11  | 2.84E-02 | -10.00 | 6.89  | 1.47E-01 |
| cg18843856 | -12.17 | 4.60  | 8.09E-03 | -25.44 | 9.90  | 1.02E-02 | -7.56   | 17.04  | 6.57E-01 | -8.13  | 5.97  | 1.73E-01 | -11.07 | 13.34 | 4.07E-01 |
| cg00693401 | 23.68  | 8.94  | 8.09E-03 | 18.05  | 23.81 | 4.48E-01 | 6.25    | 126.10 | 9.60E-01 | 25.67  | 10.01 | 1.04E-02 | 11.16  | 37.72 | 7.67E-01 |
| cg11465939 | 12.56  | 4.74  | 8.09E-03 | 11.62  | 6.66  | 8.12E-02 | 13.89   | 10.71  | 1.95E-01 | 33.49  | 17.05 | 4.95E-02 | 6.18   | 10.13 | 5.42E-01 |
| cg26328954 | -13.08 | 4.94  | 8.09E-03 | -11.01 | 7.65  | 1.50E-01 | -18.70  | 11.12  | 9.25E-02 | -11.95 | 10.90 | 2.73E-01 | -13.00 | 11.64 | 2.64E-01 |
| cg08034505 | -12.71 | 4.80  | 8.10E-03 | -8.40  | 10.04 | 4.02E-01 | -1.99   | 15.18  | 8.95E-01 | -14.66 | 6.67  | 2.79E-02 | -19.48 | 12.25 | 1.12E-01 |
| cg26875852 | -6.60  | 2.49  | 8.11E-03 | -6.15  | 4.31  | 1.54E-01 | -11.74  | 5.30   | 2.67E-02 | -1.51  | 5.03  | 7.65E-01 | -7.90  | 5.57  | 1.56E-01 |
| cg07628705 | 13.09  | 4.94  | 8.11E-03 | 12.84  | 7.73  | 9.70E-02 | 20.59   | 11.62  | 7.64E-02 | 20.12  | 10.66 | 5.91E-02 | -1.08  | 11.19 | 9.23E-01 |
| cg00811382 | 15.93  | 6.02  | 8.11E-03 | 9.88   | 11.80 | 4.02E-01 | 34.11   | 29.02  | 2.40E-01 | 15.14  | 8.30  | 6.82E-02 | 22.92  | 14.50 | 1.14E-01 |
| cg15907944 | 10.07  | 3.80  | 8.11E-03 | 14.51  | 5.61  | 9.73E-03 | 8.26    | 8.27   | 3.18E-01 | 6.52   | 14.32 | 6.49E-01 | 4.63   | 7.48  | 5.36E-01 |
| cg05511148 | -12.58 | 4.75  | 8.12E-03 | -17.12 | 9.99  | 8.66E-02 | -12.59  | 19.36  | 5.15E-01 | -13.80 | 6.18  | 2.56E-02 | 1.77   | 13.62 | 8.97E-01 |
| cg12668216 | -20.98 | 7.93  | 8.12E-03 | -9.47  | 15.19 | 5.33E-01 | -50.14  | 40.44  | 2.15E-01 | -25.49 | 10.06 | 1.13E-02 | -9.49  | 30.33 | 7.54E-01 |
| cg00924143 | 15.70  | 5.93  | 8.12E-03 | 31.15  | 10.77 | 3.83E-03 | 8.50    | 14.73  | 5.64E-01 | 11.83  | 12.44 | 3.42E-01 | 7.33   | 10.57 | 4.88E-01 |
| cg06296773 | 18.51  | 6.99  | 8.13E-03 | 41.25  | 19.52 | 3.46E-02 | 29.34   | 28.13  | 2.97E-01 | 13.62  | 8.00  | 8.87E-02 | 21.76  | 32.62 | 5.05E-01 |
| cg09453252 | 26.45  | 9.99  | 8.13E-03 | 3.82   | 19.13 | 8.42E-01 | 13.65   | 43.30  | 7.53E-01 | 33.46  | 13.12 | 1.08E-02 | 56.23  | 32.66 | 8.52E-02 |
| cg14252617 | 20.43  | 7.72  | 8.13E-03 | 2.53   | 16.59 | 8.79E-01 | 13.67   | 19.57  | 4.85E-01 | 25.12  | 10.73 | 1.92E-02 | 43.09  | 23.24 | 6.37E-02 |
| cg00063291 | -15.57 | 5.88  | 8.13E-03 | -7.31  | 12.98 | 5.73E-01 | 0.68    | 17.53  | 9.69E-01 | -18.80 | 7.61  | 1.34E-02 | -34.74 | 20.39 | 8.84E-02 |
| cg21125190 | -12.64 | 4.78  | 8.14E-03 | -18.10 | 10.02 | 7.10E-02 | -26.09  | 23.01  | 2.57E-01 | -12.27 | 6.21  | 4.83E-02 | -1.07  | 12.86 | 9.34E-01 |
| cg08399230 | 21.59  | 8.16  | 8.14E-03 | 11.56  | 16.07 | 4.72E-01 | 7.49    | 18.71  | 6.89E-01 | 38.09  | 13.06 | 3.54E-03 | 14.35  | 20.29 | 4.79E-01 |
| cg12090001 | 37.43  | 14.14 | 8.14E-03 | 36.61  | 18.09 | 4.30E-02 | 36.21   | 81.34  | 6.56E-01 | 5.26   | 48.53 | 9.14E-01 | 49.37  | 27.04 | 6.79E-02 |
| cg08466256 | -9.15  | 3.46  | 8.14E-03 | -11.09 | 6.94  | 1.10E-01 | -2.82   | 8.44   | 7.38E-01 | -9.56  | 5.46  | 8.00E-02 | -11.47 | 8.11  | 1.58E-01 |
| cg26573518 | -37.28 | 14.09 | 8.15E-03 | -67.13 | 17.58 | 1.34E-04 | -21.88  | 30.95  | 4.80E-01 | -13.26 | 16.24 | 4.14E-01 | -42.42 | 23.89 | 7.57E-02 |
| cg09776094 | 40.81  | 15.42 | 8.15E-03 | 44.29  | 21.12 | 3.60E-02 | 81.26   | 29.73  | 6.27E-03 | 15.78  | 36.30 | 6.64E-01 | 5.76   | 33.11 | 8.62E-01 |
| cg05356848 | -18.29 | 6.91  | 8.16E-03 | -3.25  | 19.36 | 8.67E-01 | 45.90   | 57.39  | 4.24E-01 | -20.86 | 8.97  | 2.00E-02 | -23.33 | 13.48 | 8.35E-02 |
| cg14913512 | -8.83  | 3.34  | 8.16E-03 | -14.51 | 5.74  | 1.15E-02 | -7.57   | 7.86   | 3.36E-01 | -6.17  | 6.12  | 3.13E-01 | -3.91  | 7.81  | 6.17E-01 |
| cg04478875 | -11.45 | 4.33  | 8.16E-03 | -13.41 | 11.57 | 2.47E-01 | -4.49   | 17.73  | 8.00E-01 | -11.67 | 5.23  | 2.57E-02 | -11.31 | 12.67 | 3.72E-01 |
| cg26856578 | -9.96  | 3.77  | 8.17E-03 | -15.64 | 7.92  | 4.83E-02 | 0.23    | 10.97  | 9.83E-01 | -10.04 | 5.08  | 4.82E-02 | -8.80  | 11.57 | 4.47E-01 |
| cg14101357 | 11.37  | 4.30  | 8.17E-03 | 9.90   | 8.81  | 2.61E-01 | 4.60    | 19.85  | 8.17E-01 | 11.66  | 5.35  | 2.94E-02 | 18.28  | 16.26 | 2.61E-01 |
| cg00300039 | -33.04 | 12.49 | 8.17E-03 | -87.86 | 42.45 | 3.85E-02 | -250.26 | 212.56 | 2.39E-01 | -26.83 | 13.63 | 4.90E-02 | -29.01 | 47.18 | 5.39E-01 |
| cg18617679 | 43.29  | 16.37 | 8.17E-03 | 45.22  | 19.93 | 2.33E-02 | -64.65  | 95.30  | 4.98E-01 | 28.38  | 64.14 | 6.58E-01 | 55.66  | 34.06 | 1.02E-01 |
| cg13436164 | 13.44  | 5.08  | 8.17E-03 | 11.00  | 7.79  | 1.58E-01 | 15.79   | 10.52  | 1.33E-01 | 8.21   | 14.94 | 5.83E-01 | 18.26  | 10.68 | 8.74E-02 |
| cg09387970 | 10.26  | 3.88  | 8.17E-03 | 4.78   | 5.32  | 3.68E-01 | 5.83    | 7.18   | 4.17E-01 | 22.84  | 8.81  | 9.51E-03 | 14.36  | 7.22  | 4.66E-02 |

|            |        |       |          |         |       |          |         |        |          |        |        |          |        |       |          |
|------------|--------|-------|----------|---------|-------|----------|---------|--------|----------|--------|--------|----------|--------|-------|----------|
| cg12497870 | 21.27  | 8.04  | 8.17E-03 | 22.92   | 13.47 | 8.89E-02 | 16.01   | 17.51  | 3.60E-01 | 12.76  | 10.45  | 2.22E-01 | 62.38  | 24.55 | 1.10E-02 |
| cg25370869 | 22.08  | 8.35  | 8.17E-03 | 11.54   | 17.85 | 5.18E-01 | 11.69   | 17.82  | 5.12E-01 | 34.54  | 12.43  | 5.45E-03 | 12.67  | 25.07 | 6.13E-01 |
| cg19714865 | 26.22  | 9.92  | 8.18E-03 | 28.98   | 21.69 | 1.82E-01 | 13.56   | 28.59  | 6.35E-01 | 25.22  | 13.24  | 5.67E-02 | 39.98  | 29.95 | 1.82E-01 |
| cg06943309 | -10.24 | 3.87  | 8.18E-03 | -12.64  | 9.30  | 1.74E-01 | -2.51   | 13.24  | 8.50E-01 | -7.93  | 4.89   | 1.05E-01 | -25.05 | 11.45 | 2.87E-02 |
| cg11232245 | 18.23  | 6.89  | 8.18E-03 | 29.71   | 16.59 | 7.34E-02 | 29.82   | 31.19  | 3.39E-01 | 17.71  | 8.36   | 3.41E-02 | -4.04  | 21.95 | 8.54E-01 |
| cg03288922 | -5.37  | 2.03  | 8.18E-03 | -5.05   | 3.07  | 1.00E-01 | -4.72   | 4.27   | 2.69E-01 | -1.56  | 5.55   | 7.79E-01 | -9.25  | 4.49  | 3.93E-02 |
| cg02665037 | 15.00  | 5.67  | 8.19E-03 | 18.82   | 6.69  | 4.89E-03 | 23.55   | 12.13  | 5.22E-02 | 20.36  | 10.39  | 5.00E-02 | -3.20  | 10.15 | 7.53E-01 |
| cg14682005 | 12.92  | 4.89  | 8.19E-03 | 14.22   | 6.62  | 3.16E-02 | 9.48    | 11.82  | 4.23E-01 | 24.82  | 15.98  | 1.20E-01 | 6.44   | 11.21 | 5.66E-01 |
| cg19495308 | 5.57   | 2.11  | 8.20E-03 | 6.36    | 2.97  | 3.24E-02 | 7.17    | 4.05   | 7.63E-02 | -0.32  | 5.84   | 9.56E-01 | 4.90   | 6.79  | 4.70E-01 |
| cg21550504 | 23.32  | 8.82  | 8.20E-03 | 18.03   | 15.63 | 2.49E-01 | 22.90   | 16.00  | 1.52E-01 | 21.38  | 18.79  | 2.55E-01 | 37.64  | 22.28 | 9.12E-02 |
| cg06339090 | -11.65 | 4.41  | 8.21E-03 | -16.68  | 11.47 | 1.46E-01 | -1.65   | 16.52  | 9.20E-01 | -10.61 | 5.35   | 4.74E-02 | -18.22 | 13.75 | 1.85E-01 |
| cg17265994 | 12.07  | 4.57  | 8.21E-03 | 12.50   | 6.48  | 5.37E-02 | 10.62   | 9.16   | 2.46E-01 | 10.59  | 18.31  | 5.63E-01 | 13.30  | 10.40 | 2.01E-01 |
| cg00808305 | 52.07  | 19.70 | 8.21E-03 | 45.66   | 22.38 | 4.14E-02 | 2.46    | 74.98  | 9.74E-01 | 137.75 | 52.54  | 8.74E-03 | 35.09  | 35.87 | 3.28E-01 |
| cg08731067 | 16.96  | 6.41  | 8.21E-03 | -5.23   | 16.83 | 7.56E-01 | 21.30   | 15.16  | 1.60E-01 | 20.85  | 8.24   | 1.14E-02 | 18.17  | 24.31 | 4.55E-01 |
| cg22709144 | -12.35 | 4.67  | 8.22E-03 | -21.70  | 11.65 | 6.25E-02 | -3.60   | 20.69  | 8.62E-01 | -9.84  | 5.66   | 8.18E-02 | -18.48 | 14.34 | 1.98E-01 |
| cg21648012 | -24.66 | 9.33  | 8.22E-03 | -48.78  | 15.40 | 1.54E-03 | -8.50   | 25.88  | 7.43E-01 | -20.78 | 10.77  | 5.37E-02 | -4.57  | 22.26 | 8.37E-01 |
| cg23326197 | -13.50 | 5.11  | 8.22E-03 | -17.18  | 7.49  | 2.18E-02 | -4.21   | 11.00  | 7.02E-01 | -6.26  | 12.90  | 6.27E-01 | -22.25 | 12.67 | 7.91E-02 |
| cg09480647 | 20.25  | 7.66  | 8.22E-03 | 15.23   | 13.62 | 2.63E-01 | 14.85   | 13.45  | 2.69E-01 | 17.28  | 18.09  | 3.39E-01 | 41.85  | 18.09 | 2.07E-02 |
| cg09347134 | 5.55   | 2.10  | 8.22E-03 | 3.23    | 2.79  | 2.47E-01 | 11.96   | 4.94   | 1.55E-02 | 10.32  | 7.87   | 1.90E-01 | 4.54   | 4.93  | 3.58E-01 |
| cg13085338 | -39.91 | 15.10 | 8.22E-03 | -113.69 | 57.89 | 4.95E-02 | -227.05 | 242.08 | 3.48E-01 | -35.45 | 16.44  | 3.10E-02 | -16.21 | 52.09 | 7.56E-01 |
| cg11019743 | -18.78 | 7.11  | 8.23E-03 | -14.85  | 21.36 | 4.87E-01 | 7.39    | 19.67  | 7.07E-01 | -25.91 | 8.53   | 2.37E-03 | -1.53  | 28.06 | 9.56E-01 |
| cg07103673 | -8.89  | 3.37  | 8.23E-03 | -2.58   | 7.13  | 7.17E-01 | -4.79   | 10.16  | 6.38E-01 | -9.00  | 4.23   | 3.35E-02 | -22.93 | 9.49  | 1.56E-02 |
| cg16847428 | 7.10   | 2.69  | 8.23E-03 | 10.16   | 3.65  | 5.36E-03 | 4.32    | 6.21   | 4.86E-01 | 6.19   | 6.88   | 3.69E-01 | -1.41  | 7.85  | 8.58E-01 |
| cg00039489 | -9.82  | 3.72  | 8.23E-03 | -18.54  | 8.45  | 2.82E-02 | -4.95   | 21.28  | 8.16E-01 | -9.11  | 4.56   | 4.58E-02 | -0.34  | 11.07 | 9.76E-01 |
| cg11859087 | 18.97  | 7.18  | 8.23E-03 | 17.30   | 11.96 | 1.48E-01 | 14.74   | 13.36  | 2.70E-01 | 11.79  | 17.98  | 5.12E-01 | 34.57  | 16.44 | 3.55E-02 |
| cg20023783 | 12.33  | 4.67  | 8.24E-03 | 16.12   | 6.69  | 1.60E-02 | 11.46   | 9.53   | 2.29E-01 | 19.91  | 14.97  | 1.84E-01 | -1.06  | 11.10 | 9.24E-01 |
| cg26464796 | 7.63   | 2.89  | 8.24E-03 | 10.48   | 5.02  | 3.67E-02 | 13.87   | 6.86   | 4.32E-02 | 5.84   | 4.35   | 1.80E-01 | -4.35  | 8.93  | 6.26E-01 |
| cg08682544 | 32.80  | 12.41 | 8.24E-03 | 29.06   | 30.03 | 3.33E-01 | 152.31  | 140.56 | 2.79E-01 | 26.54  | 14.39  | 6.52E-02 | 89.21  | 44.63 | 4.56E-02 |
| cg04939302 | -8.73  | 3.30  | 8.24E-03 | -13.39  | 7.49  | 7.38E-02 | -4.19   | 9.05   | 6.43E-01 | -9.72  | 4.49   | 3.05E-02 | -2.33  | 9.15  | 7.99E-01 |
| cg18886274 | -10.62 | 4.02  | 8.25E-03 | -16.92  | 9.27  | 6.79E-02 | -9.48   | 15.59  | 5.43E-01 | -7.01  | 4.98   | 1.60E-01 | -23.67 | 13.05 | 6.97E-02 |
| cg03073218 | -9.97  | 3.77  | 8.26E-03 | -18.61  | 8.34  | 2.56E-02 | -10.32  | 11.52  | 3.71E-01 | -7.57  | 5.00   | 1.30E-01 | -6.21  | 10.99 | 5.72E-01 |
| cg00387323 | -56.66 | 21.45 | 8.26E-03 | -36.60  | 27.38 | 1.81E-01 | -165.97 | 117.62 | 1.58E-01 | -69.74 | 101.49 | 4.92E-01 | -82.91 | 38.64 | 3.19E-02 |
| cg24108508 | 10.81  | 4.09  | 8.26E-03 | 6.90    | 7.49  | 3.57E-01 | 10.42   | 11.11  | 3.48E-01 | 12.61  | 5.94   | 3.37E-02 | 14.90  | 13.63 | 2.75E-01 |
| cg04050867 | 20.37  | 7.71  | 8.26E-03 | 30.64   | 17.70 | 8.33E-02 | 13.26   | 21.21  | 5.32E-01 | 18.91  | 12.75  | 1.38E-01 | 18.83  | 13.80 | 1.72E-01 |
| cg18376497 | 9.67   | 3.66  | 8.27E-03 | 8.75    | 4.75  | 6.55E-02 | 8.75    | 8.45   | 3.00E-01 | 26.06  | 17.79  | 1.43E-01 | 9.81   | 8.73  | 2.61E-01 |

|            |        |       |          |        |       |          |         |        |          |         |       |          |        |       |          |
|------------|--------|-------|----------|--------|-------|----------|---------|--------|----------|---------|-------|----------|--------|-------|----------|
| cg15107554 | -21.92 | 8.30  | 8.27E-03 | -30.85 | 20.84 | 1.39E-01 | -3.23   | 33.91  | 9.24E-01 | -16.42  | 9.93  | 9.83E-02 | -64.43 | 28.76 | 2.51E-02 |
| cg05158854 | -9.88  | 3.74  | 8.27E-03 | -14.70 | 7.16  | 4.00E-02 | 0.12    | 13.04  | 9.93E-01 | -6.17   | 5.15  | 2.31E-01 | -22.20 | 10.89 | 4.14E-02 |
| cg03893446 | 27.20  | 10.30 | 8.27E-03 | 29.33  | 15.38 | 5.66E-02 | 38.87   | 28.28  | 1.69E-01 | 25.03   | 20.66 | 2.26E-01 | 15.68  | 24.96 | 5.30E-01 |
| cg01385708 | 20.45  | 7.74  | 8.28E-03 | 30.05  | 12.90 | 1.99E-02 | 15.19   | 14.79  | 3.04E-01 | 9.50    | 16.11 | 5.55E-01 | 24.30  | 21.14 | 2.50E-01 |
| cg01913577 | -11.46 | 4.34  | 8.28E-03 | -18.34 | 8.03  | 2.24E-02 | -9.43   | 10.08  | 3.50E-01 | -6.91   | 7.10  | 3.30E-01 | -11.95 | 11.25 | 2.88E-01 |
| cg26703534 | 17.49  | 6.62  | 8.28E-03 | 16.70  | 9.55  | 8.04E-02 | 8.15    | 12.76  | 5.23E-01 | 39.28   | 21.81 | 7.17E-02 | 23.06  | 16.65 | 1.66E-01 |
| cg23934927 | 26.68  | 10.10 | 8.28E-03 | 23.21  | 25.34 | 3.60E-01 | 23.10   | 67.02  | 7.30E-01 | 29.59   | 12.15 | 1.49E-02 | 15.78  | 28.40 | 5.79E-01 |
| cg05629350 | 24.20  | 9.16  | 8.28E-03 | 28.47  | 24.71 | 2.49E-01 | 1.96    | 37.93  | 9.59E-01 | 24.82   | 10.82 | 2.17E-02 | 27.22  | 31.19 | 3.83E-01 |
| cg09729012 | 7.52   | 2.85  | 8.28E-03 | 10.76  | 4.11  | 8.95E-03 | 5.04    | 6.12   | 4.10E-01 | 14.36   | 9.87  | 1.46E-01 | 0.35   | 6.07  | 9.54E-01 |
| cg11953775 | -17.36 | 6.58  | 8.28E-03 | -21.61 | 9.41  | 2.17E-02 | -9.76   | 14.85  | 5.11E-01 | -25.29  | 17.50 | 1.49E-01 | -7.62  | 15.75 | 6.29E-01 |
| cg18431324 | 25.83  | 9.78  | 8.28E-03 | 12.45  | 32.12 | 6.98E-01 | 71.76   | 118.27 | 5.44E-01 | 25.39   | 10.61 | 1.67E-02 | 51.94  | 43.84 | 2.36E-01 |
| cg04657062 | 26.46  | 10.02 | 8.29E-03 | 48.74  | 18.52 | 8.48E-03 | 11.90   | 22.27  | 5.93E-01 | 16.87   | 17.12 | 3.24E-01 | 24.65  | 24.90 | 3.22E-01 |
| cg00349061 | -7.84  | 2.97  | 8.29E-03 | -10.86 | 4.24  | 1.05E-02 | -5.24   | 6.83   | 4.43E-01 | -8.42   | 8.28  | 3.09E-01 | -2.30  | 6.78  | 7.34E-01 |
| cg06820719 | -15.82 | 5.99  | 8.29E-03 | -20.91 | 10.51 | 4.67E-02 | -1.97   | 26.53  | 9.41E-01 | -13.82  | 8.27  | 9.48E-02 | -16.89 | 19.05 | 3.75E-01 |
| cg21286117 | 23.67  | 8.97  | 8.29E-03 | 46.48  | 19.39 | 1.65E-02 | 11.84   | 16.19  | 4.65E-01 | 13.34   | 14.78 | 3.67E-01 | 43.80  | 25.41 | 8.48E-02 |
| cg01414882 | 13.70  | 5.19  | 8.30E-03 | 17.42  | 7.31  | 1.71E-02 | 23.59   | 11.99  | 4.91E-02 | -4.56   | 15.15 | 7.63E-01 | 5.38   | 11.89 | 6.51E-01 |
| cg05564266 | -8.74  | 3.31  | 8.30E-03 | -8.18  | 7.45  | 2.73E-01 | -3.56   | 10.09  | 7.24E-01 | -10.49  | 4.34  | 1.57E-02 | -5.69  | 9.87  | 5.64E-01 |
| cg18711066 | -35.34 | 13.39 | 8.31E-03 | -38.06 | 15.78 | 1.59E-02 | -59.59  | 47.73  | 2.12E-01 | -7.81   | 78.04 | 9.20E-01 | -17.58 | 32.30 | 5.86E-01 |
| cg25732045 | 39.74  | 15.06 | 8.31E-03 | 55.91  | 37.35 | 1.34E-01 | 31.87   | 160.96 | 8.43E-01 | 31.57   | 17.27 | 6.75E-02 | 93.51  | 57.71 | 1.05E-01 |
| cg20216752 | 13.22  | 5.01  | 8.31E-03 | 15.05  | 6.49  | 2.03E-02 | 20.42   | 11.56  | 7.73E-02 | 5.19    | 17.74 | 7.70E-01 | -0.07  | 13.61 | 9.96E-01 |
| cg02353723 | 28.89  | 10.95 | 8.31E-03 | 11.43  | 20.61 | 5.79E-01 | 48.00   | 43.32  | 2.68E-01 | 41.34   | 14.91 | 5.55E-03 | 2.73   | 32.28 | 9.33E-01 |
| cg26305881 | 20.57  | 7.79  | 8.32E-03 | 15.57  | 15.67 | 3.20E-01 | 49.68   | 51.61  | 3.36E-01 | 20.85   | 9.75  | 3.25E-02 | 24.81  | 25.78 | 3.36E-01 |
| cg05860220 | -10.77 | 4.08  | 8.32E-03 | -25.69 | 10.59 | 1.53E-02 | -1.06   | 18.08  | 9.53E-01 | -8.13   | 4.83  | 9.22E-02 | -12.72 | 13.93 | 3.61E-01 |
| cg11643245 | -21.62 | 8.19  | 8.32E-03 | -31.82 | 16.11 | 4.83E-02 | -26.22  | 46.01  | 5.69E-01 | -11.48  | 10.76 | 2.86E-01 | -45.59 | 22.78 | 4.54E-02 |
| cg24140687 | 23.31  | 8.83  | 8.33E-03 | 34.10  | 13.57 | 1.20E-02 | 15.18   | 24.81  | 5.41E-01 | 26.72   | 24.83 | 2.82E-01 | 11.00  | 15.55 | 4.79E-01 |
| cg05103803 | 25.57  | 9.69  | 8.33E-03 | 18.33  | 16.54 | 2.68E-01 | 45.20   | 17.95  | 1.18E-02 | 14.98   | 19.27 | 4.37E-01 | 20.60  | 28.93 | 4.76E-01 |
| cg09476306 | -16.20 | 6.14  | 8.33E-03 | -13.59 | 15.39 | 3.77E-01 | -0.14   | 29.95  | 9.96E-01 | -15.25  | 7.23  | 3.49E-02 | -39.47 | 22.18 | 7.52E-02 |
| cg17526424 | 29.90  | 11.33 | 8.33E-03 | 18.93  | 16.34 | 2.47E-01 | 22.29   | 22.01  | 3.11E-01 | 55.48   | 47.69 | 2.45E-01 | 59.55  | 25.51 | 1.96E-02 |
| cg15084390 | 16.56  | 6.28  | 8.33E-03 | 31.16  | 16.87 | 6.48E-02 | 3.11    | 56.29  | 9.56E-01 | 16.00   | 7.14  | 2.49E-02 | -2.27  | 22.87 | 9.21E-01 |
| cg09674469 | 15.95  | 6.04  | 8.34E-03 | 33.49  | 15.73 | 3.33E-02 | 12.93   | 24.98  | 6.05E-01 | 14.29   | 7.10  | 4.40E-02 | -1.88  | 23.17 | 9.35E-01 |
| cg20652404 | 11.18  | 4.24  | 8.34E-03 | 13.74  | 5.76  | 1.70E-02 | 6.99    | 9.74   | 4.73E-01 | 18.00   | 11.82 | 1.28E-01 | 0.68   | 11.31 | 9.52E-01 |
| cg14975347 | -24.64 | 9.34  | 8.34E-03 | -19.39 | 15.12 | 2.00E-01 | -60.87  | 40.71  | 1.35E-01 | -33.33  | 13.78 | 1.55E-02 | 12.10  | 28.67 | 6.73E-01 |
| cg15826426 | -13.27 | 5.03  | 8.34E-03 | -24.50 | 9.48  | 9.73E-03 | -14.44  | 20.57  | 4.83E-01 | -11.60  | 7.11  | 1.03E-01 | 1.95   | 12.68 | 8.78E-01 |
| cg24277024 | 23.32  | 8.84  | 8.34E-03 | 27.38  | 15.82 | 8.35E-02 | 36.62   | 22.82  | 1.09E-01 | 22.61   | 15.14 | 1.35E-01 | 7.95   | 19.94 | 6.90E-01 |
| cg03973866 | -78.45 | 29.74 | 8.34E-03 | -77.57 | 41.11 | 5.92E-02 | -183.04 | 149.37 | 2.20E-01 | -153.85 | 68.90 | 2.56E-02 | -11.93 | 57.43 | 8.35E-01 |



|            |        |       |          |        |       |          |        |        |          |        |       |          |        |       |          |
|------------|--------|-------|----------|--------|-------|----------|--------|--------|----------|--------|-------|----------|--------|-------|----------|
| cg09777883 | 11.59  | 4.39  | 8.34E-03 | 15.05  | 6.01  | 1.24E-02 | 17.38  | 10.10  | 8.53E-02 | 5.53   | 12.72 | 6.64E-01 | -2.41  | 11.03 | 8.27E-01 |
| cg12452608 | -19.09 | 7.24  | 8.35E-03 | -20.13 | 20.63 | 3.29E-01 | -19.88 | 44.04  | 6.52E-01 | -19.52 | 8.30  | 1.87E-02 | -13.76 | 24.31 | 5.71E-01 |
| cg21548116 | 29.53  | 11.19 | 8.35E-03 | 1.54   | 28.00 | 9.56E-01 | 23.49  | 128.25 | 8.55E-01 | 34.17  | 12.77 | 7.44E-03 | 44.42  | 44.39 | 3.17E-01 |
| cg06483978 | 12.97  | 4.92  | 8.36E-03 | 12.73  | 7.21  | 7.72E-02 | 13.89  | 9.12   | 1.28E-01 | 20.91  | 15.29 | 1.71E-01 | 5.99   | 13.12 | 6.48E-01 |
| cg20475550 | -17.19 | 6.52  | 8.36E-03 | -23.07 | 10.43 | 2.69E-02 | 0.06   | 15.50  | 9.97E-01 | -17.34 | 14.77 | 2.40E-01 | -20.25 | 13.39 | 1.30E-01 |
| cg22687244 | 19.67  | 7.46  | 8.36E-03 | 24.08  | 9.75  | 1.35E-02 | 13.76  | 23.72  | 5.62E-01 | 27.07  | 21.50 | 2.08E-01 | 4.92   | 16.85 | 7.70E-01 |
| cg10296516 | 6.15   | 2.33  | 8.37E-03 | 4.90   | 3.89  | 2.07E-01 | 7.01   | 4.76   | 1.41E-01 | 7.40   | 4.10  | 7.11E-02 | 4.03   | 8.57  | 6.38E-01 |
| cg21040133 | 21.83  | 8.28  | 8.38E-03 | 31.11  | 21.93 | 1.56E-01 | 4.38   | 24.26  | 8.57E-01 | 23.93  | 10.14 | 1.82E-02 | 12.41  | 30.61 | 6.85E-01 |
| cg02480685 | -17.23 | 6.54  | 8.39E-03 | -35.33 | 17.20 | 4.00E-02 | -4.96  | 36.55  | 8.92E-01 | -12.07 | 7.50  | 1.08E-01 | -43.60 | 25.75 | 9.04E-02 |
| cg24403305 | 35.80  | 13.58 | 8.39E-03 | 45.87  | 20.72 | 2.68E-02 | 56.95  | 21.23  | 7.30E-03 | 6.57   | 14.34 | 6.47E-01 | 50.81  | 26.89 | 5.88E-02 |
| cg07460524 | -18.41 | 6.98  | 8.39E-03 | -26.27 | 17.75 | 1.39E-01 | 3.03   | 44.48  | 9.46E-01 | -17.74 | 8.30  | 3.25E-02 | -16.48 | 20.86 | 4.29E-01 |
| cg13879483 | 11.66  | 4.42  | 8.39E-03 | 20.90  | 10.19 | 4.02E-02 | 21.77  | 21.86  | 3.19E-01 | 7.10   | 5.67  | 2.11E-01 | 15.41  | 10.95 | 1.59E-01 |
| cg01557549 | 21.15  | 8.03  | 8.39E-03 | 19.69  | 12.42 | 1.13E-01 | 13.69  | 17.06  | 4.22E-01 | 28.95  | 16.76 | 8.40E-02 | 24.77  | 22.14 | 2.63E-01 |
| cg13273340 | -11.38 | 4.32  | 8.40E-03 | -14.49 | 5.89  | 1.39E-02 | 7.38   | 12.52  | 5.56E-01 | -14.92 | 11.18 | 1.82E-01 | -11.52 | 9.75  | 2.38E-01 |
| cg12906963 | -9.56  | 3.63  | 8.41E-03 | -16.08 | 5.72  | 4.93E-03 | -11.59 | 8.22   | 1.58E-01 | -0.09  | 6.59  | 9.89E-01 | -9.34  | 7.22  | 1.96E-01 |
| cg27049654 | 14.19  | 5.39  | 8.41E-03 | 13.49  | 14.78 | 3.62E-01 | 10.71  | 20.87  | 6.08E-01 | 14.92  | 6.29  | 1.77E-02 | 11.16  | 20.78 | 5.91E-01 |
| cg10126181 | 12.55  | 4.76  | 8.41E-03 | 19.40  | 6.85  | 4.64E-03 | 1.08   | 12.05  | 9.29E-01 | 14.47  | 14.77 | 3.27E-01 | 5.87   | 9.40  | 5.33E-01 |
| cg27023953 | -28.24 | 10.72 | 8.41E-03 | -29.28 | 12.90 | 2.31E-02 | -34.42 | 46.00  | 4.54E-01 | -8.90  | 62.48 | 8.87E-01 | -26.06 | 22.55 | 2.48E-01 |
| cg14017655 | 23.34  | 8.86  | 8.41E-03 | 34.52  | 33.65 | 3.05E-01 | 61.90  | 108.12 | 5.67E-01 | 20.22  | 9.56  | 3.44E-02 | 48.19  | 34.51 | 1.63E-01 |
| cg15819225 | -16.96 | 6.43  | 8.42E-03 | -20.12 | 9.18  | 2.84E-02 | -9.71  | 15.27  | 5.25E-01 | -23.19 | 20.56 | 2.59E-01 | -13.18 | 13.34 | 3.23E-01 |
| cg27264049 | 23.54  | 8.93  | 8.42E-03 | 56.64  | 23.92 | 1.79E-02 | 54.63  | 43.66  | 2.11E-01 | 15.22  | 10.21 | 1.36E-01 | 22.52  | 23.50 | 3.38E-01 |
| cg06190046 | 9.03   | 3.43  | 8.42E-03 | 7.85   | 4.81  | 1.03E-01 | 9.71   | 7.34   | 1.86E-01 | 22.89  | 11.43 | 4.52E-02 | 4.72   | 8.00  | 5.55E-01 |
| cg14695814 | -17.93 | 6.81  | 8.42E-03 | -48.99 | 22.60 | 3.02E-02 | -2.40  | 26.28  | 9.27E-01 | -16.54 | 7.62  | 3.00E-02 | -3.13  | 32.22 | 9.23E-01 |
| cg09037288 | 23.34  | 8.86  | 8.43E-03 | 29.86  | 15.03 | 4.69E-02 | 30.56  | 15.10  | 4.29E-02 | -0.07  | 20.70 | 9.97E-01 | 19.61  | 25.06 | 4.34E-01 |
| cg12286159 | -12.01 | 4.56  | 8.43E-03 | -14.75 | 9.83  | 1.33E-01 | -6.82  | 14.59  | 6.40E-01 | -12.63 | 5.82  | 3.01E-02 | -5.78  | 16.67 | 7.29E-01 |
| cg00807235 | -18.15 | 6.89  | 8.44E-03 | -12.09 | 7.44  | 1.04E-01 | -4.72  | 15.02  | 7.53E-01 | -45.10 | 17.35 | 9.34E-03 | -23.70 | 11.88 | 4.60E-02 |
| cg23750361 | 19.63  | 7.45  | 8.44E-03 | 36.15  | 18.96 | 5.65E-02 | 22.73  | 22.20  | 3.06E-01 | 13.44  | 9.41  | 1.53E-01 | 28.85  | 22.90 | 2.08E-01 |
| cg25728685 | 10.82  | 4.11  | 8.44E-03 | 12.93  | 7.79  | 9.70E-02 | 11.98  | 10.13  | 2.37E-01 | 11.32  | 7.08  | 1.10E-01 | 6.53   | 8.73  | 4.54E-01 |
| cg10872844 | -15.14 | 5.75  | 8.44E-03 | -2.07  | 14.46 | 8.86E-01 | -41.28 | 26.12  | 1.14E-01 | -16.59 | 6.76  | 1.41E-02 | -11.54 | 21.58 | 5.93E-01 |
| cg19224164 | 15.44  | 5.86  | 8.45E-03 | 15.43  | 7.94  | 5.22E-02 | 13.78  | 20.61  | 5.04E-01 | 36.43  | 23.02 | 1.14E-01 | 11.50  | 10.52 | 2.75E-01 |
| cg16107470 | -10.47 | 3.98  | 8.45E-03 | -20.45 | 7.19  | 4.44E-03 | -2.00  | 9.56   | 8.35E-01 | -6.85  | 6.20  | 2.70E-01 | -9.78  | 10.83 | 3.67E-01 |
| cg07660635 | -14.67 | 5.57  | 8.45E-03 | -22.82 | 12.51 | 6.81E-02 | -16.61 | 16.44  | 3.12E-01 | -12.26 | 7.46  | 1.00E-01 | -10.85 | 15.50 | 4.84E-01 |
| cg03915174 | -18.09 | 6.87  | 8.45E-03 | -26.10 | 19.43 | 1.79E-01 | -37.85 | 29.67  | 2.02E-01 | -16.12 | 7.89  | 4.11E-02 | -9.27  | 27.22 | 7.34E-01 |
| cg11553183 | -26.07 | 9.90  | 8.45E-03 | -27.79 | 15.40 | 7.11E-02 | -12.69 | 21.91  | 5.62E-01 | -44.93 | 24.06 | 6.18E-02 | -20.58 | 21.45 | 3.37E-01 |
| cg13316404 | -15.48 | 5.88  | 8.45E-03 | -14.20 | 8.32  | 8.81E-02 | -25.81 | 14.23  | 6.98E-02 | -6.74  | 15.18 | 6.57E-01 | -16.52 | 13.82 | 2.32E-01 |

|            |        |       |          |        |       |          |        |        |          |        |       |          |        |       |          |
|------------|--------|-------|----------|--------|-------|----------|--------|--------|----------|--------|-------|----------|--------|-------|----------|
| cg24049468 | 12.17  | 4.62  | 8.45E-03 | 13.44  | 6.59  | 4.16E-02 | 10.64  | 10.13  | 2.93E-01 | 33.39  | 16.64 | 4.47E-02 | 3.48   | 9.77  | 7.22E-01 |
| cg00745399 | 14.73  | 5.59  | 8.46E-03 | 24.12  | 10.07 | 1.66E-02 | 12.30  | 36.79  | 7.38E-01 | 14.33  | 7.59  | 5.89E-02 | -6.26  | 15.82 | 6.92E-01 |
| cg25461208 | -50.94 | 19.35 | 8.46E-03 | -16.17 | 55.07 | 7.69E-01 | -91.82 | 205.25 | 6.55E-01 | -54.14 | 23.04 | 1.88E-02 | -61.21 | 48.00 | 2.02E-01 |
| cg01271812 | 11.74  | 4.46  | 8.46E-03 | 17.73  | 6.65  | 7.72E-03 | 11.24  | 11.48  | 3.28E-01 | 11.78  | 9.73  | 2.26E-01 | -2.05  | 10.24 | 8.42E-01 |
| cg06228737 | 30.67  | 11.65 | 8.47E-03 | 33.58  | 16.87 | 4.65E-02 | 21.56  | 29.56  | 4.66E-01 | 32.02  | 36.46 | 3.80E-01 | 30.24  | 22.60 | 1.81E-01 |
| cg20436086 | -15.11 | 5.74  | 8.48E-03 | -28.58 | 10.31 | 5.56E-03 | -22.54 | 14.93  | 1.31E-01 | -5.05  | 7.92  | 5.23E-01 | -12.63 | 11.12 | 2.56E-01 |
| cg01507753 | -11.55 | 4.39  | 8.48E-03 | -23.31 | 7.17  | 1.15E-03 | -7.97  | 9.13   | 3.82E-01 | -6.18  | 6.79  | 3.62E-01 | -6.74  | 8.71  | 4.38E-01 |
| cg06355570 | 12.52  | 4.76  | 8.48E-03 | 17.87  | 8.40  | 3.33E-02 | 11.54  | 9.39   | 2.19E-01 | 12.36  | 9.28  | 1.83E-01 | 3.61   | 11.92 | 7.62E-01 |
| cg06177599 | -10.36 | 3.94  | 8.49E-03 | -12.74 | 5.71  | 2.56E-02 | 5.26   | 10.15  | 6.04E-01 | -10.59 | 9.76  | 2.78E-01 | -15.95 | 8.57  | 6.27E-02 |
| cg03045635 | 9.66   | 3.67  | 8.49E-03 | 16.74  | 6.73  | 1.28E-02 | 5.70   | 8.91   | 5.23E-01 | 12.47  | 7.67  | 1.04E-01 | 2.83   | 6.65  | 6.70E-01 |
| cg16792800 | 13.72  | 5.21  | 8.49E-03 | 22.90  | 8.75  | 8.87E-03 | 6.11   | 14.67  | 6.77E-01 | 13.25  | 11.86 | 2.64E-01 | 6.94   | 9.13  | 4.47E-01 |
| cg18464080 | 43.77  | 16.63 | 8.50E-03 | 41.07  | 20.48 | 4.49E-02 | 19.11  | 76.98  | 8.04E-01 | 150.71 | 73.14 | 3.93E-02 | 33.02  | 33.83 | 3.29E-01 |
| cg22803222 | -10.55 | 4.01  | 8.51E-03 | -13.32 | 7.53  | 7.70E-02 | -6.98  | 11.13  | 5.30E-01 | -11.56 | 5.80  | 4.62E-02 | -3.16  | 12.12 | 7.94E-01 |
| cg02796621 | 25.25  | 9.60  | 8.51E-03 | 27.36  | 18.67 | 1.43E-01 | 16.91  | 18.26  | 3.55E-01 | 27.10  | 17.28 | 1.17E-01 | 33.02  | 24.66 | 1.81E-01 |
| cg13494428 | 14.43  | 5.48  | 8.51E-03 | 16.53  | 6.43  | 1.01E-02 | 24.92  | 8.83   | 4.78E-03 | -7.52  | 16.08 | 6.40E-01 | 5.86   | 11.66 | 6.15E-01 |
| cg15311814 | 17.11  | 6.50  | 8.52E-03 | 5.17   | 12.35 | 6.76E-01 | 30.09  | 18.75  | 1.09E-01 | 20.71  | 11.10 | 6.21E-02 | 19.09  | 12.78 | 1.35E-01 |
| cg22152446 | 6.97   | 2.65  | 8.52E-03 | 5.98   | 3.78  | 1.13E-01 | 12.56  | 5.99   | 3.61E-02 | 6.53   | 5.88  | 2.67E-01 | 2.25   | 8.05  | 7.80E-01 |
| cg01907184 | -17.36 | 6.60  | 8.52E-03 | -25.95 | 17.00 | 1.27E-01 | -1.81  | 23.67  | 9.39E-01 | -19.62 | 7.99  | 1.40E-02 | 0.91   | 22.11 | 9.67E-01 |
| cg10841540 | -15.14 | 5.75  | 8.52E-03 | -13.18 | 12.51 | 2.92E-01 | -1.56  | 32.97  | 9.62E-01 | -15.69 | 6.97  | 2.44E-02 | -20.99 | 20.76 | 3.12E-01 |
| cg21400170 | 13.40  | 5.09  | 8.52E-03 | 11.66  | 6.17  | 5.89E-02 | 27.23  | 8.62   | 1.57E-03 | -1.44  | 14.15 | 9.19E-01 | 8.46   | 9.13  | 3.54E-01 |
| cg16909084 | 13.28  | 5.05  | 8.53E-03 | 18.45  | 8.11  | 2.29E-02 | 11.94  | 14.07  | 3.96E-01 | 12.64  | 10.06 | 2.09E-01 | 6.09   | 10.46 | 5.61E-01 |
| cg06844526 | -10.93 | 4.16  | 8.53E-03 | -9.59  | 8.71  | 2.71E-01 | -3.90  | 15.92  | 8.07E-01 | -10.94 | 5.58  | 4.98E-02 | -16.17 | 10.77 | 1.33E-01 |
| cg09175338 | -10.87 | 4.13  | 8.53E-03 | -15.69 | 7.92  | 4.76E-02 | -9.45  | 12.29  | 4.42E-01 | -11.15 | 6.14  | 6.94E-02 | -2.94  | 10.31 | 7.76E-01 |
| cg09941507 | 29.55  | 11.23 | 8.53E-03 | 15.79  | 39.43 | 6.89E-01 | -73.19 | 154.36 | 6.35E-01 | 35.22  | 12.07 | 3.53E-03 | -38.43 | 51.38 | 4.54E-01 |
| cg26910651 | -43.31 | 16.47 | 8.54E-03 | -88.73 | 53.31 | 9.60E-02 | -9.52  | 172.46 | 9.56E-01 | -44.27 | 18.19 | 1.49E-02 | 19.99  | 59.71 | 7.38E-01 |
| cg08348900 | 19.28  | 7.33  | 8.55E-03 | 13.94  | 10.12 | 1.68E-01 | -0.34  | 18.33  | 9.85E-01 | 37.97  | 40.15 | 3.44E-01 | 34.29  | 12.34 | 5.44E-03 |
| cg13778336 | 9.63   | 3.66  | 8.55E-03 | 3.09   | 5.34  | 5.63E-01 | 14.18  | 8.42   | 9.22E-02 | 15.73  | 13.38 | 2.40E-01 | 16.30  | 7.12  | 2.21E-02 |
| cg02520804 | 5.70   | 2.17  | 8.56E-03 | 5.27   | 3.16  | 9.49E-02 | 7.37   | 4.57   | 1.07E-01 | 5.43   | 4.71  | 2.49E-01 | 4.40   | 7.18  | 5.40E-01 |
| cg02354107 | -20.93 | 7.96  | 8.56E-03 | -70.60 | 37.31 | 5.85E-02 | -32.70 | 165.32 | 8.43E-01 | -19.28 | 8.30  | 2.02E-02 | 2.44   | 43.62 | 9.55E-01 |
| cg06655539 | 22.74  | 8.65  | 8.57E-03 | 3.18   | 18.83 | 8.66E-01 | 25.27  | 19.36  | 1.92E-01 | 21.63  | 11.47 | 5.93E-02 | 60.27  | 26.14 | 2.11E-02 |
| cg01663970 | 11.41  | 4.34  | 8.57E-03 | 10.57  | 7.04  | 1.33E-01 | 23.08  | 9.52   | 1.53E-02 | 11.49  | 5.90  | 5.15E-02 | -6.92  | 12.93 | 5.92E-01 |
| cg12809787 | -28.61 | 10.88 | 8.57E-03 | -56.84 | 38.36 | 1.38E-01 | 193.15 | 160.04 | 2.27E-01 | -25.80 | 11.70 | 2.75E-02 | -52.26 | 48.66 | 2.83E-01 |
| cg01132484 | -7.86  | 2.99  | 8.58E-03 | -7.39  | 5.01  | 1.40E-01 | -5.34  | 6.92   | 4.41E-01 | -5.62  | 5.49  | 3.06E-01 | -15.97 | 7.47  | 3.25E-02 |
| cg06103243 | 22.26  | 8.47  | 8.58E-03 | 30.73  | 11.51 | 7.58E-03 | 7.30   | 22.75  | 7.49E-01 | 10.47  | 35.92 | 7.71E-01 | 15.22  | 16.49 | 3.56E-01 |
| cg15274202 | -11.76 | 4.48  | 8.58E-03 | -23.18 | 9.77  | 1.77E-02 | -5.76  | 19.08  | 7.63E-01 | -9.36  | 5.61  | 9.51E-02 | -6.33  | 14.28 | 6.58E-01 |

|            |        |       |          |        |       |          |         |        |          |        |       |          |        |       |          |
|------------|--------|-------|----------|--------|-------|----------|---------|--------|----------|--------|-------|----------|--------|-------|----------|
| cg07297964 | 8.44   | 3.21  | 8.59E-03 | 6.12   | 4.48  | 1.72E-01 | 12.62   | 8.36   | 1.31E-01 | 12.75  | 7.11  | 7.29E-02 | 6.17   | 8.74  | 4.80E-01 |
| cg00251358 | -9.37  | 3.57  | 8.59E-03 | -4.25  | 6.50  | 5.14E-01 | -13.04  | 14.09  | 3.55E-01 | -11.48 | 5.09  | 2.40E-02 | -11.29 | 9.43  | 2.31E-01 |
| cg15952370 | -8.96  | 3.41  | 8.60E-03 | -18.23 | 6.78  | 7.18E-03 | -6.02   | 11.96  | 6.15E-01 | -5.86  | 4.84  | 2.26E-01 | -5.62  | 8.29  | 4.98E-01 |
| cg10188823 | 15.87  | 6.04  | 8.60E-03 | 16.24  | 16.20 | 3.16E-01 | 25.13   | 24.27  | 3.00E-01 | 15.87  | 8.11  | 5.03E-02 | 13.31  | 12.22 | 2.76E-01 |
| cg12758039 | -21.33 | 8.12  | 8.60E-03 | -34.62 | 15.41 | 2.47E-02 | -3.16   | 19.36  | 8.70E-01 | -19.94 | 13.53 | 1.41E-01 | -21.39 | 18.81 | 2.55E-01 |
| cg18643958 | -34.08 | 12.97 | 8.60E-03 | -23.20 | 22.34 | 2.99E-01 | -132.06 | 162.82 | 4.17E-01 | -39.43 | 16.96 | 2.01E-02 | -32.92 | 48.57 | 4.98E-01 |
| cg11755796 | 20.06  | 7.63  | 8.60E-03 | 31.94  | 14.93 | 3.24E-02 | 9.90    | 22.63  | 6.62E-01 | 19.83  | 11.65 | 8.88E-02 | 10.60  | 17.25 | 5.39E-01 |
| cg04639905 | -6.79  | 2.58  | 8.60E-03 | -6.91  | 5.10  | 1.75E-01 | 3.76    | 7.37   | 6.10E-01 | -8.32  | 3.79  | 2.82E-02 | -10.32 | 6.54  | 1.14E-01 |
| cg19096358 | 11.72  | 4.46  | 8.61E-03 | 8.42   | 6.24  | 1.78E-01 | 19.51   | 8.24   | 1.79E-02 | 24.92  | 20.78 | 2.31E-01 | 3.71   | 11.51 | 7.47E-01 |
| cg14398353 | 20.01  | 7.62  | 8.61E-03 | 29.93  | 16.48 | 6.94E-02 | -10.33  | 32.53  | 7.51E-01 | 19.81  | 9.43  | 3.58E-02 | 15.95  | 26.92 | 5.54E-01 |
| cg05776630 | -7.23  | 2.75  | 8.62E-03 | -8.55  | 4.02  | 3.33E-02 | -6.83   | 6.40   | 2.86E-01 | -8.05  | 7.08  | 2.56E-01 | -3.79  | 6.22  | 5.43E-01 |
| cg21574204 | 38.33  | 14.59 | 8.62E-03 | 37.62  | 46.31 | 4.17E-01 | -307.64 | 208.89 | 1.41E-01 | 41.64  | 16.10 | 9.70E-03 | 25.39  | 53.44 | 6.35E-01 |
| cg26414000 | 11.91  | 4.53  | 8.63E-03 | 13.88  | 8.70  | 1.11E-01 | 7.35    | 11.50  | 5.23E-01 | 15.36  | 6.69  | 2.16E-02 | -0.54  | 13.44 | 9.68E-01 |
| cg01392017 | -15.55 | 5.92  | 8.63E-03 | -6.14  | 14.83 | 6.79E-01 | -18.54  | 14.80  | 2.10E-01 | -18.86 | 7.55  | 1.25E-02 | -0.27  | 23.00 | 9.91E-01 |
| cg23263937 | 11.50  | 4.38  | 8.63E-03 | 18.58  | 8.14  | 2.25E-02 | 10.39   | 9.42   | 2.70E-01 | 6.26   | 8.96  | 4.85E-01 | 9.31   | 8.64  | 2.81E-01 |
| cg05452618 | 24.16  | 9.20  | 8.63E-03 | 28.86  | 17.22 | 9.38E-02 | 14.17   | 17.27  | 4.12E-01 | 24.58  | 18.95 | 1.95E-01 | 31.33  | 20.82 | 1.32E-01 |
| cg11874272 | -11.14 | 4.24  | 8.63E-03 | -12.65 | 9.04  | 1.62E-01 | -8.06   | 19.82  | 6.84E-01 | -7.87  | 5.35  | 1.42E-01 | -28.79 | 13.04 | 2.73E-02 |
| cg00113951 | 42.44  | 16.16 | 8.63E-03 | 63.94  | 21.46 | 2.89E-03 | -2.49   | 44.67  | 9.56E-01 | 31.46  | 51.06 | 5.38E-01 | 16.68  | 35.94 | 6.43E-01 |
| cg17890778 | 18.70  | 7.12  | 8.63E-03 | 6.29   | 10.99 | 5.67E-01 | 43.61   | 15.87  | 5.98E-03 | 18.65  | 11.63 | 1.09E-01 | 16.89  | 13.57 | 2.13E-01 |
| cg07158816 | -10.09 | 3.84  | 8.63E-03 | -17.25 | 9.65  | 7.39E-02 | -8.07   | 13.53  | 5.51E-01 | -6.42  | 4.86  | 1.87E-01 | -19.67 | 10.37 | 5.77E-02 |
| cg08211028 | 14.27  | 5.43  | 8.64E-03 | 23.44  | 9.33  | 1.20E-02 | 4.13    | 15.74  | 7.93E-01 | 18.90  | 13.26 | 1.54E-01 | 7.12   | 8.88  | 4.23E-01 |
| cg23125492 | 21.78  | 8.29  | 8.64E-03 | 18.08  | 12.37 | 1.44E-01 | -0.76   | 16.48  | 9.63E-01 | 41.88  | 14.44 | 3.72E-03 | 24.87  | 15.20 | 1.02E-01 |
| cg07064066 | -32.82 | 12.50 | 8.64E-03 | -55.34 | 20.73 | 7.61E-03 | -52.57  | 27.13  | 5.26E-02 | -11.89 | 13.10 | 3.64E-01 | -34.84 | 33.85 | 3.03E-01 |
| cg18094781 | 22.86  | 8.71  | 8.64E-03 | 40.62  | 16.76 | 1.53E-02 | 22.72   | 22.03  | 3.03E-01 | 26.58  | 14.53 | 6.74E-02 | -1.05  | 17.27 | 9.52E-01 |
| cg16514113 | 8.25   | 3.14  | 8.64E-03 | 11.72  | 4.66  | 1.20E-02 | 0.39    | 8.60   | 9.64E-01 | 7.79   | 8.63  | 3.67E-01 | 6.60   | 5.94  | 2.67E-01 |
| cg08815340 | 11.33  | 4.31  | 8.64E-03 | 17.58  | 6.55  | 7.27E-03 | 9.67    | 10.13  | 3.40E-01 | 12.59  | 12.64 | 3.19E-01 | 1.80   | 8.32  | 8.29E-01 |
| cg22619824 | 11.85  | 4.51  | 8.64E-03 | 15.11  | 5.78  | 8.99E-03 | -0.30   | 8.14   | 9.70E-01 | 23.27  | 10.86 | 3.21E-02 | 11.42  | 9.98  | 2.53E-01 |
| cg15889793 | -15.57 | 5.93  | 8.65E-03 | -0.94  | 17.67 | 9.57E-01 | -23.00  | 26.15  | 3.79E-01 | -17.30 | 6.69  | 9.67E-03 | -13.57 | 26.57 | 6.10E-01 |
| cg00703902 | 31.05  | 11.82 | 8.65E-03 | 15.68  | 20.18 | 4.37E-01 | 13.86   | 33.84  | 6.82E-01 | 50.82  | 28.56 | 7.52E-02 | 42.02  | 19.62 | 3.22E-02 |
| cg06002476 | -16.76 | 6.38  | 8.65E-03 | -14.82 | 21.36 | 4.88E-01 | -8.49   | 29.79  | 7.76E-01 | -17.21 | 7.04  | 1.46E-02 | -21.02 | 30.61 | 4.92E-01 |
| cg12009606 | 19.63  | 7.48  | 8.65E-03 | 24.49  | 17.13 | 1.53E-01 | -27.87  | 102.01 | 7.85E-01 | 19.84  | 8.75  | 2.33E-02 | 8.42   | 27.63 | 7.60E-01 |
| cg11202380 | 13.89  | 5.29  | 8.65E-03 | 7.42   | 11.35 | 5.13E-01 | 28.82   | 14.76  | 5.08E-02 | 13.54  | 6.94  | 5.09E-02 | 9.65   | 19.72 | 6.25E-01 |
| cg18674618 | 26.34  | 10.03 | 8.65E-03 | 24.27  | 18.97 | 2.01E-01 | 30.64   | 21.87  | 1.61E-01 | 14.52  | 16.23 | 3.71E-01 | 59.12  | 28.06 | 3.51E-02 |
| cg18930267 | 19.15  | 7.29  | 8.65E-03 | 32.03  | 12.51 | 1.05E-02 | 4.30    | 13.65  | 7.53E-01 | 15.82  | 18.00 | 3.79E-01 | 21.09  | 15.90 | 1.85E-01 |
| cg26862691 | -38.61 | 14.70 | 8.65E-03 | -43.19 | 26.44 | 1.02E-01 | -24.08  | 80.19  | 7.64E-01 | -46.17 | 20.01 | 2.10E-02 | 4.40   | 43.05 | 9.18E-01 |

|            |        |       |          |        |       |          |         |        |          |        |       |          |        |       |          |
|------------|--------|-------|----------|--------|-------|----------|---------|--------|----------|--------|-------|----------|--------|-------|----------|
| cg25901559 | -11.46 | 4.37  | 8.66E-03 | -10.70 | 6.43  | 9.61E-02 | -13.49  | 9.74   | 1.66E-01 | -7.21  | 11.75 | 5.39E-01 | -14.12 | 9.76  | 1.48E-01 |
| cg11481451 | -11.76 | 4.48  | 8.66E-03 | -25.84 | 9.78  | 8.25E-03 | -16.04  | 18.72  | 3.92E-01 | -7.05  | 5.86  | 2.29E-01 | -8.74  | 11.58 | 4.50E-01 |
| cg20038647 | 22.71  | 8.65  | 8.66E-03 | -5.50  | 23.82 | 8.17E-01 | 6.74    | 51.96  | 8.97E-01 | 26.74  | 9.95  | 7.19E-03 | 35.89  | 29.77 | 2.28E-01 |
| cg10868668 | -13.33 | 5.08  | 8.67E-03 | -3.43  | 12.38 | 7.82E-01 | -10.45  | 13.69  | 4.45E-01 | -15.94 | 6.70  | 1.73E-02 | -18.03 | 14.71 | 2.20E-01 |
| cg05463782 | 21.44  | 8.17  | 8.67E-03 | 29.65  | 20.26 | 1.43E-01 | 75.46   | 81.28  | 3.53E-01 | 20.06  | 9.43  | 3.34E-02 | 10.47  | 29.56 | 7.23E-01 |
| cg15450349 | 15.68  | 5.97  | 8.68E-03 | 13.13  | 8.09  | 1.04E-01 | 16.81   | 12.20  | 1.68E-01 | 10.34  | 24.49 | 6.73E-01 | 24.91  | 15.16 | 1.00E-01 |
| cg01300495 | -16.11 | 6.14  | 8.68E-03 | -11.82 | 13.58 | 3.84E-01 | 12.29   | 27.88  | 6.59E-01 | -20.14 | 7.68  | 8.76E-03 | -13.18 | 18.61 | 4.79E-01 |
| cg26129417 | 21.61  | 8.24  | 8.68E-03 | 31.31  | 15.00 | 3.69E-02 | -7.92   | 24.72  | 7.49E-01 | 31.86  | 17.39 | 6.68E-02 | 16.26  | 13.66 | 2.34E-01 |
| cg02084214 | 13.58  | 5.17  | 8.69E-03 | 14.38  | 9.60  | 1.34E-01 | 8.62    | 17.07  | 6.13E-01 | 14.04  | 7.16  | 4.97E-02 | 13.37  | 16.82 | 4.27E-01 |
| cg09149541 | -36.33 | 13.85 | 8.69E-03 | -23.79 | 20.38 | 2.43E-01 | -30.11  | 54.07  | 5.78E-01 | -77.09 | 42.99 | 7.29E-02 | -41.67 | 22.79 | 6.75E-02 |
| cg02030275 | 10.90  | 4.15  | 8.69E-03 | 11.54  | 5.98  | 5.35E-02 | 7.01    | 9.24   | 4.48E-01 | 2.59   | 10.98 | 8.14E-01 | 20.53  | 10.00 | 4.00E-02 |
| cg06967105 | -15.27 | 5.82  | 8.69E-03 | -21.15 | 8.30  | 1.09E-02 | -5.20   | 12.21  | 6.70E-01 | -14.77 | 18.98 | 4.36E-01 | -12.33 | 13.43 | 3.59E-01 |
| cg21859455 | 23.35  | 8.90  | 8.69E-03 | 17.94  | 15.17 | 2.37E-01 | 17.32   | 16.92  | 3.06E-01 | 25.50  | 20.50 | 2.14E-01 | 39.77  | 20.38 | 5.10E-02 |
| cg24425807 | -12.61 | 4.80  | 8.70E-03 | -19.91 | 6.50  | 2.18E-03 | -3.83   | 11.81  | 7.46E-01 | -7.28  | 13.97 | 6.02E-01 | -1.33  | 11.66 | 9.09E-01 |
| cg07473175 | 50.74  | 19.34 | 8.70E-03 | 39.96  | 24.53 | 1.03E-01 | 16.95   | 73.55  | 8.18E-01 | 141.25 | 77.81 | 6.95E-02 | 64.67  | 38.88 | 9.62E-02 |
| cg14199144 | -17.74 | 6.76  | 8.70E-03 | -26.08 | 13.97 | 6.19E-02 | -8.38   | 25.36  | 7.41E-01 | -14.37 | 8.62  | 9.55E-02 | -27.59 | 23.97 | 2.50E-01 |
| cg17409891 | 19.16  | 7.30  | 8.71E-03 | 23.64  | 19.03 | 2.14E-01 | 1.04    | 68.50  | 9.88E-01 | 21.33  | 8.34  | 1.05E-02 | -9.54  | 26.85 | 7.22E-01 |
| cg00011239 | 11.43  | 4.36  | 8.71E-03 | 14.03  | 7.80  | 7.22E-02 | 16.70   | 11.58  | 1.49E-01 | 10.66  | 6.44  | 9.81E-02 | -2.08  | 14.62 | 8.87E-01 |
| cg16711011 | -41.43 | 15.79 | 8.71E-03 | -34.39 | 17.75 | 5.26E-02 | 31.27   | 44.98  | 4.87E-01 | -65.98 | 27.37 | 1.59E-02 | -62.67 | 28.44 | 2.75E-02 |
| cg09293391 | -11.50 | 4.39  | 8.71E-03 | -14.27 | 6.97  | 4.08E-02 | -8.17   | 8.76   | 3.51E-01 | 1.06   | 12.22 | 9.31E-01 | -17.54 | 9.24  | 5.76E-02 |
| cg18034859 | 22.81  | 8.69  | 8.71E-03 | 10.40  | 15.77 | 5.10E-01 | 47.33   | 19.68  | 1.62E-02 | 26.07  | 13.60 | 5.52E-02 | -2.23  | 28.44 | 9.38E-01 |
| cg26613648 | 21.31  | 8.13  | 8.71E-03 | 24.54  | 18.23 | 1.78E-01 | -4.25   | 41.71  | 9.19E-01 | 21.54  | 9.94  | 3.03E-02 | 23.18  | 26.30 | 3.78E-01 |
| cg20316440 | 41.67  | 15.89 | 8.72E-03 | 33.02  | 21.70 | 1.28E-01 | 11.27   | 50.04  | 8.22E-01 | 69.11  | 43.51 | 1.12E-01 | 59.26  | 33.14 | 7.38E-02 |
| cg01228271 | -9.10  | 3.47  | 8.73E-03 | -10.95 | 6.84  | 1.10E-01 | -11.22  | 11.26  | 3.19E-01 | -6.29  | 4.94  | 2.03E-01 | -13.67 | 8.82  | 1.21E-01 |
| cg01094114 | -9.09  | 3.46  | 8.74E-03 | -7.96  | 5.94  | 1.80E-01 | -14.63  | 12.78  | 2.52E-01 | -8.08  | 5.08  | 1.12E-01 | -12.72 | 9.96  | 2.02E-01 |
| cg10127921 | -10.02 | 3.82  | 8.74E-03 | -16.33 | 9.07  | 7.18E-02 | -10.22  | 15.38  | 5.07E-01 | -6.67  | 4.73  | 1.59E-01 | -19.70 | 11.59 | 8.90E-02 |
| cg07398594 | 26.55  | 10.13 | 8.74E-03 | 13.55  | 33.89 | 6.89E-01 | 186.16  | 137.06 | 1.74E-01 | 30.45  | 11.12 | 6.18E-03 | -12.00 | 36.65 | 7.43E-01 |
| cg15822795 | 31.50  | 12.01 | 8.74E-03 | 25.88  | 15.98 | 1.05E-01 | 5.85    | 33.76  | 8.62E-01 | 64.57  | 37.12 | 8.20E-02 | 46.02  | 26.62 | 8.38E-02 |
| cg15484532 | 16.46  | 6.28  | 8.74E-03 | 26.08  | 12.20 | 3.26E-02 | 6.52    | 15.78  | 6.80E-01 | 15.19  | 11.12 | 1.72E-01 | 14.27  | 12.35 | 2.48E-01 |
| cg01872840 | 16.85  | 6.43  | 8.74E-03 | 5.11   | 16.99 | 7.63E-01 | 7.40    | 30.31  | 8.07E-01 | 16.68  | 7.40  | 2.42E-02 | 55.11  | 26.62 | 3.84E-02 |
| cg17894889 | 26.98  | 10.29 | 8.75E-03 | 3.77   | 38.50 | 9.22E-01 | -113.14 | 158.44 | 4.75E-01 | 30.77  | 10.99 | 5.10E-03 | 4.10   | 47.32 | 9.31E-01 |
| cg07891473 | 19.37  | 7.39  | 8.75E-03 | 18.77  | 11.32 | 9.75E-02 | 11.40   | 19.79  | 5.64E-01 | 32.98  | 22.14 | 1.36E-01 | 18.92  | 12.99 | 1.45E-01 |
| cg00910168 | 10.41  | 3.97  | 8.76E-03 | 15.23  | 8.45  | 7.13E-02 | 6.19    | 9.68   | 5.23E-01 | 12.90  | 5.79  | 2.59E-02 | -0.47  | 10.61 | 9.65E-01 |
| cg22623223 | 23.17  | 8.84  | 8.76E-03 | 20.40  | 19.79 | 3.03E-01 | 16.65   | 27.81  | 5.49E-01 | 17.64  | 11.96 | 1.40E-01 | 50.79  | 22.58 | 2.45E-02 |
| cg01368227 | -14.16 | 5.40  | 8.76E-03 | -5.89  | 11.08 | 5.95E-01 | -38.12  | 22.05  | 8.38E-02 | -12.18 | 6.99  | 8.13E-02 | -30.69 | 16.77 | 6.72E-02 |

|            |        |       |          |        |       |          |        |        |          |        |       |          |        |       |          |
|------------|--------|-------|----------|--------|-------|----------|--------|--------|----------|--------|-------|----------|--------|-------|----------|
| cg03315649 | 15.63  | 5.96  | 8.76E-03 | 13.25  | 8.92  | 1.38E-01 | 27.61  | 12.11  | 2.27E-02 | 7.78   | 15.39 | 6.13E-01 | 11.54  | 14.88 | 4.38E-01 |
| cg09205083 | 17.16  | 6.55  | 8.78E-03 | 12.81  | 10.26 | 2.12E-01 | 13.03  | 11.76  | 2.68E-01 | 41.07  | 17.75 | 2.07E-02 | 15.77  | 17.06 | 3.55E-01 |
| cg00699934 | -43.37 | 16.55 | 8.78E-03 | -40.16 | 21.11 | 5.71E-02 | 10.44  | 48.52  | 8.30E-01 | -53.58 | 56.51 | 3.43E-01 | -83.49 | 38.65 | 3.08E-02 |
| cg01859669 | 14.24  | 5.43  | 8.78E-03 | 7.09   | 6.48  | 2.73E-01 | 26.14  | 10.72  | 1.47E-02 | 7.00   | 17.10 | 6.82E-01 | 25.94  | 13.60 | 5.65E-02 |
| cg23188819 | 24.05  | 9.18  | 8.78E-03 | 11.76  | 19.69 | 5.50E-01 | 144.54 | 89.13  | 1.05E-01 | 24.90  | 11.23 | 2.66E-02 | 32.01  | 28.46 | 2.61E-01 |
| cg06158065 | 19.99  | 7.63  | 8.78E-03 | 22.84  | 9.66  | 1.81E-02 | 20.47  | 27.75  | 4.61E-01 | 42.24  | 41.95 | 3.14E-01 | 10.47  | 14.74 | 4.78E-01 |
| cg06803614 | -16.01 | 6.11  | 8.79E-03 | -20.98 | 11.92 | 7.83E-02 | -22.16 | 14.59  | 1.29E-01 | -6.06  | 9.46  | 5.22E-01 | -28.24 | 16.07 | 7.90E-02 |
| cg00451388 | -13.59 | 5.19  | 8.79E-03 | -16.72 | 7.84  | 3.30E-02 | -8.82  | 11.94  | 4.60E-01 | -13.79 | 13.94 | 3.22E-01 | -11.47 | 10.68 | 2.83E-01 |
| cg05330678 | -28.44 | 10.85 | 8.80E-03 | -25.66 | 17.27 | 1.37E-01 | -11.21 | 53.00  | 8.33E-01 | -19.92 | 16.79 | 2.36E-01 | -65.46 | 28.48 | 2.15E-02 |
| cg19779116 | -34.09 | 13.01 | 8.80E-03 | -48.38 | 39.62 | 2.22E-01 | -75.19 | 176.62 | 6.70E-01 | -37.73 | 14.45 | 9.02E-03 | 27.97  | 47.17 | 5.53E-01 |
| cg17905462 | -9.31  | 3.56  | 8.81E-03 | -17.54 | 8.49  | 3.89E-02 | -13.27 | 13.57  | 3.28E-01 | -5.77  | 4.44  | 1.94E-01 | -14.12 | 10.47 | 1.77E-01 |
| cg04986304 | 13.49  | 5.15  | 8.81E-03 | -4.64  | 13.46 | 7.30E-01 | 16.48  | 16.37  | 3.14E-01 | 16.09  | 6.18  | 9.24E-03 | 22.60  | 20.93 | 2.80E-01 |
| cg05656180 | 20.29  | 7.75  | 8.81E-03 | 16.29  | 12.43 | 1.90E-01 | 35.91  | 20.03  | 7.29E-02 | 48.02  | 22.65 | 3.40E-02 | 8.61   | 13.19 | 5.14E-01 |
| cg10437224 | -12.57 | 4.80  | 8.81E-03 | -19.04 | 8.62  | 2.72E-02 | 2.84   | 10.19  | 7.81E-01 | -13.90 | 8.86  | 1.17E-01 | -17.56 | 10.50 | 9.45E-02 |
| cg12011522 | -10.97 | 4.19  | 8.81E-03 | -13.16 | 6.62  | 4.68E-02 | -16.67 | 9.85   | 9.06E-02 | -0.63  | 8.79  | 9.43E-01 | -13.23 | 9.54  | 1.66E-01 |
| cg06748153 | 37.46  | 14.30 | 8.81E-03 | 23.18  | 36.12 | 5.21E-01 | 74.87  | 162.82 | 6.46E-01 | 39.10  | 16.47 | 1.76E-02 | 46.31  | 50.15 | 3.56E-01 |
| cg10406295 | 22.11  | 8.44  | 8.81E-03 | 27.07  | 12.04 | 2.46E-02 | -3.49  | 28.46  | 9.03E-01 | 41.14  | 30.75 | 1.81E-01 | 17.42  | 14.38 | 2.26E-01 |
| cg11014740 | -18.66 | 7.13  | 8.81E-03 | -23.87 | 10.89 | 2.83E-02 | -14.63 | 16.92  | 3.87E-01 | -12.44 | 15.15 | 4.11E-01 | -17.85 | 17.14 | 2.98E-01 |
| cg05172425 | 88.65  | 33.85 | 8.81E-03 | 43.86  | 48.48 | 3.66E-01 | 129.68 | 220.60 | 5.57E-01 | 99.66  | 77.64 | 1.99E-01 | 151.38 | 61.88 | 1.44E-02 |
| cg17291423 | 7.32   | 2.79  | 8.82E-03 | 8.93   | 3.74  | 1.70E-02 | 11.65  | 6.73   | 8.34E-02 | 6.33   | 8.52  | 4.58E-01 | -2.17  | 6.94  | 7.54E-01 |
| cg21909206 | 18.03  | 6.88  | 8.82E-03 | 15.55  | 19.66 | 4.29E-01 | 11.71  | 25.39  | 6.45E-01 | 15.72  | 7.98  | 4.88E-02 | 59.73  | 28.20 | 3.41E-02 |
| cg18019825 | -33.25 | 12.70 | 8.83E-03 | -40.33 | 18.25 | 2.72E-02 | 26.28  | 39.03  | 5.01E-01 | -51.58 | 33.97 | 1.29E-01 | -34.41 | 24.40 | 1.58E-01 |
| cg09651708 | -12.85 | 4.91  | 8.83E-03 | -12.66 | 12.90 | 3.26E-01 | 1.81   | 20.88  | 9.31E-01 | -12.27 | 5.79  | 3.40E-02 | -28.39 | 17.25 | 9.99E-02 |
| cg18718102 | -19.93 | 7.61  | 8.84E-03 | -18.53 | 10.89 | 8.87E-02 | -23.54 | 19.23  | 2.21E-01 | -6.82  | 20.45 | 7.39E-01 | -28.92 | 16.40 | 7.78E-02 |
| cg05030518 | -20.04 | 7.65  | 8.84E-03 | -12.58 | 19.23 | 5.13E-01 | -35.35 | 48.40  | 4.65E-01 | -20.66 | 9.07  | 2.27E-02 | -23.46 | 23.73 | 3.23E-01 |
| cg03587978 | -10.61 | 4.05  | 8.84E-03 | -9.12  | 6.70  | 1.74E-01 | -11.38 | 7.97   | 1.54E-01 | -11.28 | 9.12  | 2.16E-01 | -11.82 | 9.61  | 2.19E-01 |
| cg22096687 | 11.68  | 4.46  | 8.84E-03 | 17.56  | 6.39  | 5.97E-03 | 18.73  | 10.08  | 6.31E-02 | 6.59   | 8.65  | 4.46E-01 | -1.22  | 9.90  | 9.02E-01 |
| cg18200741 | 12.02  | 4.59  | 8.84E-03 | 14.11  | 6.36  | 2.65E-02 | 15.91  | 11.94  | 1.83E-01 | 14.03  | 12.53 | 2.63E-01 | 2.18   | 10.36 | 8.33E-01 |
| cg13642142 | 15.66  | 5.98  | 8.84E-03 | 14.60  | 9.03  | 1.06E-01 | 18.67  | 11.75  | 1.12E-01 | 23.38  | 14.87 | 1.16E-01 | 4.51   | 16.00 | 7.78E-01 |
| cg00101715 | 12.44  | 4.75  | 8.84E-03 | 10.85  | 6.31  | 8.56E-02 | 20.82  | 10.68  | 5.13E-02 | 19.67  | 19.91 | 3.23E-01 | 5.89   | 11.24 | 6.01E-01 |
| cg25637226 | 26.48  | 10.12 | 8.85E-03 | 30.51  | 17.25 | 7.70E-02 | 21.71  | 20.85  | 2.98E-01 | 23.96  | 19.11 | 2.10E-01 | 29.67  | 27.00 | 2.72E-01 |
| cg02761866 | 7.02   | 2.68  | 8.85E-03 | 10.21  | 4.85  | 3.53E-02 | 6.86   | 6.44   | 2.87E-01 | 7.28   | 4.14  | 7.87E-02 | -3.49  | 8.48  | 6.81E-01 |
| cg21202452 | 25.16  | 9.61  | 8.86E-03 | 21.66  | 15.22 | 1.55E-01 | 32.62  | 27.78  | 2.40E-01 | 45.09  | 26.74 | 9.17E-02 | 19.27  | 16.20 | 2.34E-01 |
| cg07140366 | -12.94 | 4.95  | 8.86E-03 | -12.11 | 10.37 | 2.43E-01 | -14.80 | 18.65  | 4.28E-01 | -12.93 | 6.48  | 4.60E-02 | -13.51 | 14.29 | 3.45E-01 |
| cg11852671 | 27.49  | 10.50 | 8.86E-03 | 24.62  | 16.00 | 1.24E-01 | 10.07  | 35.15  | 7.74E-01 | 30.44  | 21.49 | 1.57E-01 | 36.14  | 21.39 | 9.11E-02 |

|            |        |       |          |        |       |          |         |        |          |        |       |          |         |       |          |
|------------|--------|-------|----------|--------|-------|----------|---------|--------|----------|--------|-------|----------|---------|-------|----------|
| cg18351711 | -19.26 | 7.36  | 8.87E-03 | -29.86 | 13.28 | 2.46E-02 | -9.93   | 16.52  | 5.48E-01 | -17.69 | 12.91 | 1.71E-01 | -14.01  | 17.87 | 4.33E-01 |
| cg09412728 | 6.45   | 2.46  | 8.88E-03 | 6.43   | 3.72  | 8.39E-02 | 6.60    | 3.72   | 7.58E-02 | -7.52  | 14.46 | 6.03E-01 | 10.14   | 8.07  | 2.09E-01 |
| cg08061360 | -91.69 | 35.04 | 8.88E-03 | -98.33 | 50.77 | 5.28E-02 | 16.03   | 197.24 | 9.35E-01 | -50.18 | 64.08 | 4.34E-01 | -157.26 | 79.77 | 4.87E-02 |
| cg18156192 | -14.48 | 5.53  | 8.89E-03 | -16.94 | 8.58  | 4.82E-02 | 1.06    | 13.95  | 9.39E-01 | -24.89 | 12.64 | 4.88E-02 | -12.02  | 11.43 | 2.93E-01 |
| cg25185518 | 25.42  | 9.72  | 8.89E-03 | 15.80  | 13.76 | 2.51E-01 | 84.01   | 136.91 | 5.39E-01 | 34.96  | 14.89 | 1.89E-02 | 31.69   | 36.56 | 3.86E-01 |
| cg01203828 | 21.55  | 8.24  | 8.90E-03 | 36.72  | 15.39 | 1.71E-02 | 26.28   | 17.52  | 1.34E-01 | 4.38   | 13.21 | 7.40E-01 | 34.03   | 25.62 | 1.84E-01 |
| cg23274680 | 34.96  | 13.37 | 8.91E-03 | 40.21  | 26.11 | 1.24E-01 | -25.29  | 69.58  | 7.16E-01 | 37.29  | 17.26 | 3.08E-02 | 29.55   | 41.94 | 4.81E-01 |
| cg26638341 | 22.43  | 8.57  | 8.91E-03 | 36.96  | 18.86 | 5.00E-02 | 28.19   | 19.88  | 1.56E-01 | 11.20  | 12.33 | 3.64E-01 | 33.33   | 24.37 | 1.71E-01 |
| cg19477793 | 10.51  | 4.02  | 8.91E-03 | 15.49  | 7.30  | 3.38E-02 | 8.05    | 8.75   | 3.58E-01 | 5.82   | 6.61  | 3.79E-01 | 16.75   | 11.72 | 1.53E-01 |
| cg07394347 | 42.54  | 16.27 | 8.92E-03 | 55.91  | 19.63 | 4.40E-03 | 73.02   | 80.21  | 3.63E-01 | 13.18  | 72.25 | 8.55E-01 | 2.16    | 34.56 | 9.50E-01 |
| cg17686885 | 15.25  | 5.83  | 8.94E-03 | 15.31  | 8.29  | 6.48E-02 | 7.48    | 14.42  | 6.04E-01 | 15.39  | 25.05 | 5.39E-01 | 19.53   | 10.88 | 7.26E-02 |
| cg01363198 | -10.18 | 3.89  | 8.94E-03 | -11.46 | 5.28  | 2.99E-02 | -12.29  | 9.13   | 1.78E-01 | -16.83 | 13.30 | 2.06E-01 | -1.41   | 8.97  | 8.76E-01 |
| cg04552921 | -15.15 | 5.79  | 8.94E-03 | -16.07 | 11.85 | 1.75E-01 | -12.14  | 23.19  | 6.01E-01 | -13.94 | 7.65  | 6.82E-02 | -20.48  | 16.45 | 2.13E-01 |
| cg19711800 | 18.83  | 7.20  | 8.94E-03 | 24.97  | 17.49 | 1.53E-01 | 35.37   | 20.65  | 8.67E-02 | 16.20  | 8.99  | 7.16E-02 | -1.68   | 27.96 | 9.52E-01 |
| cg26486441 | -12.74 | 4.87  | 8.94E-03 | -12.00 | 6.96  | 8.44E-02 | -18.75  | 11.43  | 1.01E-01 | -22.54 | 14.79 | 1.27E-01 | -4.53   | 10.43 | 6.64E-01 |
| cg24693376 | -9.83  | 3.76  | 8.95E-03 | -18.28 | 7.40  | 1.35E-02 | -5.23   | 9.05   | 5.63E-01 | -8.61  | 5.82  | 1.39E-01 | -4.01   | 9.68  | 6.79E-01 |
| cg24593832 | -11.39 | 4.36  | 8.95E-03 | -15.30 | 10.12 | 1.30E-01 | -14.54  | 13.13  | 2.68E-01 | -9.53  | 5.71  | 9.50E-02 | -11.43  | 12.43 | 3.58E-01 |
| cg18656860 | 37.70  | 14.42 | 8.95E-03 | 35.14  | 31.62 | 2.66E-01 | -88.39  | 175.01 | 6.14E-01 | 35.49  | 17.12 | 3.82E-02 | 76.78   | 52.42 | 1.43E-01 |
| cg13253847 | 10.47  | 4.01  | 8.95E-03 | 11.49  | 5.44  | 3.49E-02 | 14.88   | 9.10   | 1.02E-01 | 7.79   | 10.56 | 4.61E-01 | 2.04    | 11.53 | 8.59E-01 |
| cg03725444 | 13.41  | 5.13  | 8.95E-03 | 18.34  | 8.86  | 3.84E-02 | 11.25   | 8.49   | 1.85E-01 | 23.62  | 16.57 | 1.54E-01 | 4.35    | 11.38 | 7.02E-01 |
| cg09085842 | -33.34 | 12.76 | 8.95E-03 | 0.07   | 40.72 | 9.99E-01 | 105.20  | 237.97 | 6.58E-01 | -37.55 | 13.80 | 6.50E-03 | -35.06  | 60.45 | 5.62E-01 |
| cg07766263 | 15.75  | 6.03  | 8.96E-03 | 27.02  | 9.34  | 3.83E-03 | 16.14   | 15.29  | 2.91E-01 | 1.41   | 14.15 | 9.20E-01 | 7.06    | 12.12 | 5.60E-01 |
| cg04839835 | 10.74  | 4.11  | 8.97E-03 | 15.16  | 6.98  | 2.99E-02 | 10.71   | 10.71  | 3.17E-01 | 11.65  | 6.61  | 7.80E-02 | -5.07   | 11.93 | 6.71E-01 |
| cg09258878 | 36.74  | 14.06 | 8.97E-03 | 50.66  | 17.89 | 4.63E-03 | 27.84   | 44.03  | 5.27E-01 | 87.01  | 69.78 | 2.12E-01 | -1.22   | 27.89 | 9.65E-01 |
| cg11233547 | 12.73  | 4.87  | 8.98E-03 | 7.74   | 10.62 | 4.66E-01 | 6.60    | 12.25  | 5.90E-01 | 18.91  | 6.64  | 4.39E-03 | -1.35   | 15.96 | 9.33E-01 |
| cg05671968 | -15.60 | 5.97  | 8.98E-03 | -19.98 | 12.44 | 1.08E-01 | -22.14  | 17.41  | 2.03E-01 | -17.09 | 8.54  | 4.54E-02 | -0.28   | 14.75 | 9.85E-01 |
| cg16935061 | -8.13  | 3.11  | 8.98E-03 | -5.38  | 4.65  | 2.48E-01 | -15.79  | 7.33   | 3.12E-02 | -6.76  | 8.60  | 4.32E-01 | -8.26   | 6.33  | 1.92E-01 |
| cg17050724 | 24.34  | 9.32  | 8.98E-03 | 7.75   | 22.29 | 7.28E-01 | 7.91    | 67.77  | 9.07E-01 | 29.15  | 10.87 | 7.32E-03 | 19.82   | 34.87 | 5.70E-01 |
| cg03127349 | -10.98 | 4.20  | 8.98E-03 | -9.84  | 5.97  | 9.95E-02 | -8.68   | 9.69   | 3.70E-01 | -12.38 | 11.89 | 2.98E-01 | -15.26  | 9.59  | 1.12E-01 |
| cg21556309 | 49.02  | 18.76 | 8.99E-03 | 54.25  | 44.85 | 2.26E-01 | -143.90 | 146.71 | 3.27E-01 | 54.15  | 22.19 | 1.47E-02 | 33.85   | 61.29 | 5.81E-01 |
| cg19708340 | -16.25 | 6.22  | 8.99E-03 | -23.50 | 15.74 | 1.35E-01 | -19.23  | 25.15  | 4.45E-01 | -11.64 | 7.51  | 1.21E-01 | -35.55  | 20.09 | 7.68E-02 |
| cg05655915 | 5.55   | 2.13  | 9.00E-03 | 4.48   | 2.85  | 1.16E-01 | 11.40   | 4.88   | 1.96E-02 | 7.38   | 5.40  | 1.72E-01 | -1.95   | 6.52  | 7.65E-01 |
| cg15816511 | 57.02  | 21.83 | 9.00E-03 | 40.69  | 27.25 | 1.35E-01 | 67.73   | 111.45 | 5.43E-01 | 43.94  | 78.04 | 5.73E-01 | 102.88  | 44.40 | 2.05E-02 |
| cg23196129 | 18.74  | 7.17  | 9.01E-03 | 25.61  | 11.16 | 2.18E-02 | 11.56   | 16.87  | 4.93E-01 | 23.63  | 15.41 | 1.25E-01 | 5.00    | 16.48 | 7.62E-01 |
| cg22058906 | 15.02  | 5.75  | 9.02E-03 | 10.95  | 8.07  | 1.75E-01 | 18.63   | 12.09  | 1.23E-01 | 21.17  | 18.33 | 2.48E-01 | 18.92   | 14.10 | 1.80E-01 |

|            |        |       |          |        |       |          |         |        |          |         |        |          |         |       |          |
|------------|--------|-------|----------|--------|-------|----------|---------|--------|----------|---------|--------|----------|---------|-------|----------|
| cg16103159 | -11.29 | 4.32  | 9.02E-03 | -14.61 | 6.74  | 3.01E-02 | -11.18  | 9.10   | 2.19E-01 | -0.48   | 11.48  | 9.66E-01 | -12.16  | 9.22  | 1.87E-01 |
| cg04290346 | 19.77  | 7.57  | 9.03E-03 | 18.58  | 17.50 | 2.89E-01 | 8.28    | 24.50  | 7.35E-01 | 27.39   | 11.08  | 1.34E-02 | 10.81   | 15.16 | 4.76E-01 |
| cg07137983 | 16.45  | 6.30  | 9.04E-03 | 20.31  | 11.81 | 8.55E-02 | -3.28   | 21.29  | 8.78E-01 | 16.85   | 8.64   | 5.12E-02 | 20.69   | 20.27 | 3.07E-01 |
| cg06362078 | 24.86  | 9.52  | 9.05E-03 | 4.09   | 22.10 | 8.53E-01 | 3.84    | 38.10  | 9.20E-01 | 26.54   | 12.01  | 2.71E-02 | 58.38   | 27.19 | 3.18E-02 |
| cg23287229 | -27.91 | 10.69 | 9.05E-03 | -28.88 | 15.88 | 6.89E-02 | -4.98   | 25.73  | 8.47E-01 | -50.41  | 26.89  | 6.09E-02 | -27.75  | 23.04 | 2.28E-01 |
| cg16805291 | 6.62   | 2.54  | 9.05E-03 | 5.00   | 3.58  | 1.62E-01 | 14.43   | 6.35   | 2.31E-02 | 7.75    | 5.37   | 1.49E-01 | 0.67    | 7.46  | 9.29E-01 |
| cg13839957 | -8.94  | 3.42  | 9.06E-03 | -8.90  | 4.64  | 5.51E-02 | -5.92   | 7.90   | 4.54E-01 | -9.35   | 13.19  | 4.78E-01 | -11.75  | 7.67  | 1.25E-01 |
| cg07562835 | 19.01  | 7.28  | 9.06E-03 | 28.38  | 10.08 | 4.86E-03 | 0.81    | 16.63  | 9.61E-01 | 21.34   | 22.44  | 3.42E-01 | 9.88    | 17.13 | 5.64E-01 |
| cg02280348 | -16.39 | 6.28  | 9.06E-03 | 5.26   | 16.22 | 7.46E-01 | -4.10   | 41.08  | 9.20E-01 | -21.43  | 7.21   | 2.97E-03 | -12.22  | 23.99 | 6.11E-01 |
| cg03541934 | 15.70  | 6.02  | 9.07E-03 | -2.15  | 18.41 | 9.07E-01 | -7.79   | 32.17  | 8.09E-01 | 17.65   | 6.69   | 8.35E-03 | 38.50   | 26.83 | 1.51E-01 |
| cg03744954 | -33.74 | 12.93 | 9.07E-03 | -35.21 | 21.87 | 1.07E-01 | 43.46   | 104.59 | 6.78E-01 | -26.65  | 18.34  | 1.46E-01 | -64.10  | 34.80 | 6.54E-02 |
| cg05940703 | -28.79 | 11.03 | 9.08E-03 | -13.45 | 18.17 | 4.59E-01 | -36.82  | 40.41  | 3.62E-01 | -7.18   | 30.78  | 8.16E-01 | -47.11  | 16.87 | 5.22E-03 |
| cg03074946 | 12.07  | 4.63  | 9.08E-03 | 14.15  | 6.49  | 2.93E-02 | 14.83   | 9.90   | 1.34E-01 | 19.73   | 13.04  | 1.30E-01 | -5.60   | 12.01 | 6.41E-01 |
| cg21912060 | 12.55  | 4.81  | 9.09E-03 | 16.15  | 7.07  | 2.22E-02 | 9.97    | 12.97  | 4.42E-01 | 17.94   | 20.43  | 3.80E-01 | 7.85    | 8.22  | 3.39E-01 |
| cg26246387 | 48.50  | 18.59 | 9.09E-03 | 23.92  | 61.43 | 6.97E-01 | 282.42  | 220.37 | 2.00E-01 | 55.47   | 20.66  | 7.24E-03 | -7.11   | 61.63 | 9.08E-01 |
| cg19440720 | 12.12  | 4.64  | 9.09E-03 | 7.33   | 9.52  | 4.41E-01 | -1.02   | 16.19  | 9.50E-01 | 18.34   | 6.06   | 2.48E-03 | -3.38   | 15.27 | 8.25E-01 |
| cg02037013 | -12.69 | 4.87  | 9.09E-03 | -14.27 | 12.30 | 2.46E-01 | -13.44  | 13.96  | 3.36E-01 | -9.53   | 6.37   | 1.35E-01 | -23.69  | 13.12 | 7.09E-02 |
| cg19243130 | 25.02  | 9.59  | 9.09E-03 | 28.16  | 17.30 | 1.04E-01 | -5.47   | 42.27  | 8.97E-01 | 27.15   | 13.54  | 4.50E-02 | 21.73   | 25.69 | 3.98E-01 |
| cg06603828 | -47.23 | 18.11 | 9.09E-03 | -44.25 | 21.04 | 3.55E-02 | -12.67  | 88.10  | 8.86E-01 | -197.21 | 103.71 | 5.72E-02 | -42.37  | 41.88 | 3.12E-01 |
| cg26228241 | -52.62 | 20.17 | 9.10E-03 | -55.71 | 59.17 | 3.46E-01 | -116.27 | 313.17 | 7.10E-01 | -44.50  | 22.75  | 5.04E-02 | -114.71 | 66.19 | 8.31E-02 |
| cg23018242 | -42.72 | 16.38 | 9.10E-03 | -60.55 | 31.43 | 5.40E-02 | 16.58   | 94.68  | 8.61E-01 | -30.51  | 23.10  | 1.87E-01 | -58.40  | 37.02 | 1.15E-01 |
| cg02019072 | 37.80  | 14.49 | 9.10E-03 | 23.40  | 20.70 | 2.58E-01 | 46.05   | 49.93  | 3.56E-01 | 67.52   | 44.30  | 1.28E-01 | 47.78   | 25.67 | 6.27E-02 |
| cg24145020 | -12.60 | 4.83  | 9.10E-03 | -19.90 | 12.34 | 1.07E-01 | -28.76  | 23.87  | 2.28E-01 | -11.78  | 5.74   | 4.01E-02 | -0.27   | 15.49 | 9.86E-01 |
| cg10964330 | -12.68 | 4.86  | 9.10E-03 | -10.92 | 12.76 | 3.92E-01 | -18.83  | 28.02  | 5.02E-01 | -14.70  | 5.69   | 9.81E-03 | 2.03    | 15.73 | 8.97E-01 |
| cg04651548 | 13.45  | 5.16  | 9.11E-03 | 13.25  | 8.37  | 1.14E-01 | 5.21    | 10.78  | 6.29E-01 | 15.72   | 10.43  | 1.32E-01 | 23.08   | 13.48 | 8.68E-02 |
| cg07598199 | -11.97 | 4.59  | 9.12E-03 | -17.24 | 9.60  | 7.26E-02 | -7.17   | 16.96  | 6.72E-01 | -9.22   | 6.36   | 1.47E-01 | -15.26  | 10.92 | 1.62E-01 |
| cg00971364 | 41.18  | 15.79 | 9.12E-03 | 51.20  | 23.83 | 3.17E-02 | 76.22   | 67.97  | 2.62E-01 | 121.42  | 66.72  | 6.88E-02 | 17.26   | 23.53 | 4.63E-01 |
| cg10229594 | 19.93  | 7.64  | 9.12E-03 | 18.80  | 10.49 | 7.32E-02 | -16.35  | 36.87  | 6.57E-01 | 42.80   | 21.27  | 4.42E-02 | 17.27   | 14.02 | 2.18E-01 |
| cg04450052 | -9.57  | 3.67  | 9.12E-03 | -10.21 | 5.19  | 4.90E-02 | -10.44  | 9.91   | 2.92E-01 | -5.28   | 8.27   | 5.23E-01 | -12.00  | 9.01  | 1.83E-01 |
| cg27420415 | -11.06 | 4.24  | 9.13E-03 | -17.85 | 10.22 | 8.07E-02 | -2.40   | 18.76  | 8.98E-01 | -9.60   | 5.16   | 6.31E-02 | -13.57  | 13.26 | 3.06E-01 |
| cg09857324 | 15.41  | 5.91  | 9.13E-03 | 17.02  | 9.41  | 7.04E-02 | 13.16   | 11.78  | 2.64E-01 | 10.10   | 14.34  | 4.81E-01 | 19.95   | 13.80 | 1.48E-01 |
| cg22103219 | -10.93 | 4.19  | 9.13E-03 | -14.54 | 5.95  | 1.45E-02 | -13.00  | 11.07  | 2.40E-01 | -5.82   | 10.73  | 5.87E-01 | -4.59   | 9.21  | 6.18E-01 |
| cg01793445 | -19.38 | 7.43  | 9.14E-03 | -32.61 | 13.37 | 1.47E-02 | -27.43  | 18.10  | 1.30E-01 | -5.70   | 15.06  | 7.05E-01 | -11.78  | 14.09 | 4.03E-01 |
| cg25358938 | 19.76  | 7.58  | 9.14E-03 | 5.73   | 22.31 | 7.97E-01 | 103.44  | 102.93 | 3.15E-01 | 20.05   | 8.32   | 1.60E-02 | 38.42   | 34.10 | 2.60E-01 |
| cg25141766 | 21.04  | 8.07  | 9.14E-03 | 15.95  | 10.96 | 1.46E-01 | 37.61   | 14.22  | 8.16E-03 | 30.26   | 26.29  | 2.50E-01 | -6.34   | 22.67 | 7.80E-01 |

|            |        |       |          |         |       |          |         |        |          |        |       |          |        |       |          |
|------------|--------|-------|----------|---------|-------|----------|---------|--------|----------|--------|-------|----------|--------|-------|----------|
| cg19596804 | -9.78  | 3.75  | 9.14E-03 | -21.13  | 10.14 | 3.71E-02 | -7.08   | 14.05  | 6.14E-01 | -9.34  | 4.46  | 3.64E-02 | 2.47   | 12.77 | 8.47E-01 |
| cg03733196 | 32.87  | 12.61 | 9.14E-03 | 74.85   | 45.10 | 9.70E-02 | -3.91   | 215.83 | 9.86E-01 | 30.41  | 13.65 | 2.59E-02 | 16.67  | 49.28 | 7.35E-01 |
| cg13126530 | 16.38  | 6.28  | 9.14E-03 | 14.87   | 21.17 | 4.82E-01 | 28.99   | 32.19  | 3.68E-01 | 18.98  | 7.38  | 1.02E-02 | 1.43   | 16.28 | 9.30E-01 |
| cg13421412 | 10.77  | 4.13  | 9.14E-03 | 16.45   | 6.97  | 1.83E-02 | 12.95   | 9.06   | 1.53E-01 | 8.60   | 9.88  | 3.84E-01 | 2.97   | 8.02  | 7.11E-01 |
| cg07989501 | 31.33  | 12.02 | 9.15E-03 | 27.95   | 19.49 | 1.52E-01 | -26.24  | 79.76  | 7.42E-01 | 37.74  | 17.56 | 3.16E-02 | 28.11  | 33.58 | 4.02E-01 |
| cg03339609 | -15.56 | 5.97  | 9.15E-03 | -12.04  | 8.27  | 1.45E-01 | -12.82  | 15.23  | 4.00E-01 | -19.04 | 17.14 | 2.67E-01 | -24.57 | 13.24 | 6.34E-02 |
| cg24020826 | -17.49 | 6.71  | 9.16E-03 | -36.96  | 12.60 | 3.36E-03 | -3.63   | 17.04  | 8.31E-01 | -13.28 | 8.83  | 1.32E-01 | -11.64 | 15.95 | 4.65E-01 |
| cg22795239 | -19.02 | 7.30  | 9.17E-03 | -14.93  | 13.98 | 2.86E-01 | -26.14  | 21.57  | 2.26E-01 | -18.26 | 10.27 | 7.55E-02 | -25.38 | 22.23 | 2.54E-01 |
| cg25181170 | 6.90   | 2.65  | 9.17E-03 | 9.49    | 4.08  | 2.00E-02 | 4.74    | 6.19   | 4.44E-01 | 8.62   | 5.04  | 8.71E-02 | -2.87  | 7.65  | 7.07E-01 |
| cg19587237 | 12.91  | 4.96  | 9.18E-03 | 14.70   | 6.99  | 3.55E-02 | 15.00   | 10.80  | 1.65E-01 | 26.80  | 15.79 | 8.98E-02 | -1.48  | 11.44 | 8.97E-01 |
| cg23168603 | -18.48 | 7.09  | 9.19E-03 | -16.68  | 21.24 | 4.32E-01 | 30.04   | 33.98  | 3.77E-01 | -19.43 | 8.04  | 1.56E-02 | -42.20 | 27.55 | 1.26E-01 |
| cg27640302 | 17.61  | 6.76  | 9.19E-03 | 21.21   | 9.97  | 3.35E-02 | 23.84   | 14.08  | 9.05E-02 | 20.75  | 19.05 | 2.76E-01 | -1.31  | 15.76 | 9.34E-01 |
| cg09581137 | -9.93  | 3.81  | 9.19E-03 | -8.23   | 5.79  | 1.55E-01 | -8.72   | 7.58   | 2.50E-01 | -18.46 | 11.29 | 1.02E-01 | -10.26 | 8.51  | 2.28E-01 |
| cg03238901 | 24.83  | 9.53  | 9.20E-03 | 17.13   | 18.38 | 3.51E-01 | -19.10  | 51.23  | 7.09E-01 | 31.09  | 12.36 | 1.19E-02 | 23.47  | 29.89 | 4.32E-01 |
| cg05144928 | -6.22  | 2.39  | 9.20E-03 | -6.02   | 3.40  | 7.61E-02 | -6.86   | 4.50   | 1.27E-01 | -10.31 | 10.06 | 3.05E-01 | -4.35  | 5.85  | 4.57E-01 |
| cg09610286 | 27.29  | 10.48 | 9.20E-03 | 45.74   | 22.56 | 4.26E-02 | 103.41  | 59.34  | 8.14E-02 | 20.91  | 13.35 | 1.17E-01 | 9.57   | 28.33 | 7.35E-01 |
| cg02968844 | 24.73  | 9.49  | 9.21E-03 | 35.03   | 17.93 | 5.08E-02 | 27.57   | 17.28  | 1.11E-01 | 6.47   | 18.09 | 7.21E-01 | 33.73  | 25.16 | 1.80E-01 |
| cg11071231 | 25.50  | 9.79  | 9.21E-03 | 36.73   | 27.09 | 1.75E-01 | -8.33   | 57.22  | 8.84E-01 | 23.94  | 11.78 | 4.20E-02 | 29.53  | 25.38 | 2.45E-01 |
| cg10514207 | -11.66 | 4.48  | 9.21E-03 | -13.83  | 9.00  | 1.24E-01 | 4.49    | 18.89  | 8.12E-01 | -9.64  | 6.09  | 1.14E-01 | -20.95 | 11.30 | 6.39E-02 |
| cg20167471 | 24.45  | 9.39  | 9.21E-03 | 25.68   | 18.89 | 1.74E-01 | 31.41   | 18.89  | 9.64E-02 | 22.92  | 16.28 | 1.59E-01 | 15.71  | 22.54 | 4.86E-01 |
| cg27298262 | 20.94  | 8.04  | 9.21E-03 | 18.46   | 16.11 | 2.52E-01 | 16.87   | 16.59  | 3.09E-01 | 17.46  | 12.57 | 1.65E-01 | 49.03  | 24.61 | 4.64E-02 |
| cg22619549 | -19.66 | 7.55  | 9.21E-03 | -27.23  | 9.71  | 5.03E-03 | -28.87  | 18.95  | 1.28E-01 | -19.35 | 24.42 | 4.28E-01 | 3.73   | 15.33 | 8.08E-01 |
| cg11176095 | 13.21  | 5.07  | 9.22E-03 | 13.74   | 7.42  | 6.40E-02 | 24.74   | 12.71  | 5.15E-02 | 16.69  | 14.11 | 2.37E-01 | 2.79   | 10.28 | 7.86E-01 |
| cg17254229 | -14.36 | 5.52  | 9.22E-03 | -16.46  | 7.84  | 3.57E-02 | -5.83   | 13.40  | 6.63E-01 | -20.73 | 14.13 | 1.42E-01 | -11.28 | 12.90 | 3.82E-01 |
| cg26105283 | -17.66 | 6.78  | 9.22E-03 | -35.09  | 12.05 | 3.60E-03 | 1.04    | 14.30  | 9.42E-01 | -15.83 | 9.27  | 8.78E-02 | -16.96 | 13.62 | 2.13E-01 |
| cg10111314 | -32.80 | 12.60 | 9.22E-03 | -0.72   | 34.32 | 9.83E-01 | -125.62 | 142.22 | 3.77E-01 | -34.32 | 14.29 | 1.64E-02 | -62.71 | 44.32 | 1.57E-01 |
| cg24579887 | 13.11  | 5.04  | 9.22E-03 | 20.20   | 7.40  | 6.34E-03 | 22.00   | 13.01  | 9.08E-02 | 5.98   | 13.67 | 6.62E-01 | 2.31   | 8.77  | 7.92E-01 |
| cg19363699 | -68.28 | 26.22 | 9.22E-03 | -126.76 | 69.80 | 6.94E-02 | -439.09 | 263.43 | 9.55E-02 | -57.27 | 30.88 | 6.36E-02 | -37.02 | 73.42 | 6.14E-01 |
| cg09051513 | 22.09  | 8.49  | 9.23E-03 | 21.93   | 18.99 | 2.48E-01 | 0.49    | 21.32  | 9.82E-01 | 20.82  | 9.28  | 2.49E-02 | 62.74  | 26.63 | 1.85E-02 |
| cg24674703 | -9.81  | 3.77  | 9.24E-03 | -12.22  | 5.28  | 2.07E-02 | -3.75   | 9.99   | 7.07E-01 | -9.80  | 9.02  | 2.77E-01 | -7.74  | 9.04  | 3.92E-01 |
| cg03916864 | -57.25 | 22.00 | 9.25E-03 | -81.06  | 63.68 | 2.03E-01 | -142.98 | 280.86 | 6.11E-01 | -54.14 | 25.41 | 3.31E-02 | -48.98 | 62.09 | 4.30E-01 |
| cg17125472 | 8.82   | 3.39  | 9.25E-03 | 6.51    | 4.32  | 1.32E-01 | 20.69   | 8.34   | 1.31E-02 | 3.53   | 11.56 | 7.60E-01 | 8.20   | 9.27  | 3.77E-01 |
| cg06576119 | 59.66  | 22.93 | 9.26E-03 | 78.91   | 53.48 | 1.40E-01 | -128.64 | 202.29 | 5.25E-01 | 57.51  | 27.33 | 3.54E-02 | 63.63  | 72.55 | 3.80E-01 |
| cg26070383 | 23.96  | 9.21  | 9.26E-03 | 33.62   | 16.95 | 4.73E-02 | 11.53   | 17.11  | 5.00E-01 | 28.22  | 18.55 | 1.28E-01 | 22.15  | 22.38 | 3.22E-01 |
| cg15543281 | 45.20  | 17.37 | 9.26E-03 | 79.84   | 44.24 | 7.11E-02 | 168.21  | 223.50 | 4.52E-01 | 33.86  | 19.74 | 8.63E-02 | 86.78  | 68.08 | 2.02E-01 |



|            |         |       |          |         |       |          |         |        |          |        |       |          |         |       |          |
|------------|---------|-------|----------|---------|-------|----------|---------|--------|----------|--------|-------|----------|---------|-------|----------|
| cg03906115 | 7.69    | 2.96  | 9.27E-03 | 8.27    | 4.08  | 4.25E-02 | 14.59   | 7.29   | 4.55E-02 | 7.36   | 8.85  | 4.05E-01 | 0.62    | 6.65  | 9.25E-01 |
| cg23294388 | -38.31  | 14.72 | 9.27E-03 | -43.53  | 17.23 | 1.15E-02 | -7.14   | 69.33  | 9.18E-01 | -54.47 | 78.04 | 4.85E-01 | -22.59  | 33.84 | 5.04E-01 |
| cg09176893 | -28.95  | 11.13 | 9.27E-03 | -23.85  | 17.71 | 1.78E-01 | 0.29    | 46.59  | 9.95E-01 | -27.21 | 24.96 | 2.76E-01 | -40.48  | 18.82 | 3.15E-02 |
| cg06705138 | 19.29   | 7.41  | 9.27E-03 | 28.48   | 15.02 | 5.80E-02 | -0.35   | 35.56  | 9.92E-01 | 17.54  | 9.41  | 6.22E-02 | 16.07   | 24.47 | 5.11E-01 |
| cg10181822 | 28.76   | 11.05 | 9.27E-03 | 53.21   | 34.77 | 1.26E-01 | -82.05  | 158.54 | 6.05E-01 | 28.87  | 12.04 | 1.65E-02 | -10.81  | 48.82 | 8.25E-01 |
| cg12616683 | 34.37   | 13.21 | 9.27E-03 | 35.65   | 16.92 | 3.52E-02 | 60.85   | 57.07  | 2.86E-01 | 32.73  | 45.44 | 4.71E-01 | 26.23   | 26.30 | 3.19E-01 |
| cg13552869 | -12.50  | 4.80  | 9.27E-03 | -5.89   | 5.38  | 2.74E-01 | -16.97  | 8.15   | 3.73E-02 | -27.41 | 9.23  | 2.99E-03 | -6.10   | 7.88  | 4.39E-01 |
| cg15538809 | 18.09   | 6.95  | 9.28E-03 | 18.89   | 8.90  | 3.38E-02 | 14.00   | 19.56  | 4.74E-01 | 42.55  | 26.69 | 1.11E-01 | 9.74    | 15.75 | 5.36E-01 |
| cg02576296 | -22.37  | 8.60  | 9.28E-03 | -18.25  | 19.04 | 3.38E-01 | -12.94  | 22.74  | 5.69E-01 | -29.86 | 11.51 | 9.48E-03 | -1.37   | 27.92 | 9.61E-01 |
| cg13115617 | -110.05 | 42.30 | 9.28E-03 | -123.03 | 72.41 | 8.93E-02 | -86.23  | 179.82 | 6.32E-01 | -59.96 | 28.73 | 3.69E-02 | -240.94 | 83.07 | 3.73E-03 |
| cg06132069 | 16.07   | 6.18  | 9.29E-03 | 24.34   | 8.80  | 5.69E-03 | 5.48    | 17.49  | 7.54E-01 | 4.29   | 21.18 | 8.40E-01 | 10.19   | 11.32 | 3.68E-01 |
| cg12099279 | -18.92  | 7.28  | 9.29E-03 | -29.82  | 16.12 | 6.44E-02 | -45.61  | 35.06  | 1.93E-01 | -12.79 | 9.29  | 1.69E-01 | -21.69  | 19.40 | 2.64E-01 |
| cg10019392 | -26.97  | 10.37 | 9.29E-03 | -30.27  | 13.42 | 2.41E-02 | -16.22  | 43.45  | 7.09E-01 | -54.19 | 34.09 | 1.12E-01 | -11.71  | 20.57 | 5.69E-01 |
| cg27070729 | 21.03   | 8.08  | 9.29E-03 | 23.60   | 13.67 | 8.42E-02 | 16.50   | 36.62  | 6.52E-01 | 21.60  | 11.63 | 6.33E-02 | 12.95   | 23.47 | 5.81E-01 |
| cg21792134 | 5.26    | 2.02  | 9.30E-03 | 5.48    | 2.93  | 6.18E-02 | 7.58    | 5.87   | 1.97E-01 | 5.96   | 3.73  | 1.11E-01 | 0.10    | 6.00  | 9.87E-01 |
| cg18785679 | -15.16  | 5.83  | 9.30E-03 | -19.08  | 9.34  | 4.12E-02 | -4.36   | 11.61  | 7.07E-01 | -9.76  | 14.14 | 4.90E-01 | -26.41  | 13.43 | 4.92E-02 |
| cg23770553 | 21.66   | 8.33  | 9.30E-03 | 48.19   | 22.09 | 2.91E-02 | 12.86   | 45.39  | 7.77E-01 | 15.72  | 9.63  | 1.03E-01 | 34.31   | 30.16 | 2.55E-01 |
| cg02322376 | -43.15  | 16.59 | 9.31E-03 | -49.87  | 20.71 | 1.60E-02 | -62.34  | 74.42  | 4.02E-01 | 6.50   | 52.16 | 9.01E-01 | -41.98  | 36.44 | 2.49E-01 |
| cg00381179 | 40.55   | 15.59 | 9.31E-03 | 38.22   | 19.31 | 4.78E-02 | -29.12  | 59.70  | 6.26E-01 | 38.64  | 75.47 | 6.09E-01 | 67.36   | 32.03 | 3.55E-02 |
| cg01585985 | 32.44   | 12.47 | 9.31E-03 | 15.66   | 32.70 | 6.32E-01 | 27.81   | 159.45 | 8.62E-01 | 40.22  | 14.12 | 4.39E-03 | -20.56  | 47.82 | 6.67E-01 |
| cg01449064 | -47.89  | 18.42 | 9.31E-03 | -65.02  | 24.32 | 7.51E-03 | -64.32  | 70.79  | 3.64E-01 | -24.31 | 70.43 | 7.30E-01 | -15.78  | 34.19 | 6.44E-01 |
| cg20098659 | 5.36    | 2.06  | 9.32E-03 | 2.80    | 3.40  | 4.10E-01 | 11.22   | 4.43   | 1.14E-02 | 4.92   | 3.55  | 1.66E-01 | 3.10    | 7.27  | 6.70E-01 |
| cg23218979 | 39.22   | 15.09 | 9.32E-03 | 43.00   | 20.02 | 3.17E-02 | 64.45   | 61.52  | 2.95E-01 | 58.30  | 49.12 | 2.35E-01 | 19.58   | 28.62 | 4.94E-01 |
| cg14633757 | 17.55   | 6.75  | 9.33E-03 | 24.78   | 16.15 | 1.25E-01 | -18.77  | 55.20  | 7.34E-01 | 16.92  | 8.08  | 3.62E-02 | 15.04   | 20.16 | 4.56E-01 |
| cg26681183 | 10.30   | 3.96  | 9.33E-03 | 15.20   | 6.02  | 1.15E-02 | 12.41   | 7.51   | 9.84E-02 | 0.57   | 13.74 | 9.67E-01 | 1.03    | 8.75  | 9.07E-01 |
| cg15081720 | -15.62  | 6.01  | 9.33E-03 | -28.98  | 13.43 | 3.10E-02 | -20.73  | 17.42  | 2.34E-01 | -10.78 | 7.92  | 1.74E-01 | -10.92  | 18.47 | 5.55E-01 |
| cg13686589 | 32.38   | 12.46 | 9.33E-03 | 57.12   | 40.59 | 1.59E-01 | -180.59 | 174.47 | 3.01E-01 | 29.33  | 13.61 | 3.11E-02 | 53.43   | 49.86 | 2.84E-01 |
| cg03594311 | -12.94  | 4.98  | 9.34E-03 | -12.79  | 7.03  | 6.90E-02 | -13.78  | 11.55  | 2.33E-01 | -24.43 | 21.97 | 2.66E-01 | -10.39  | 9.74  | 2.86E-01 |
| cg07064595 | 25.64   | 9.86  | 9.34E-03 | 37.87   | 17.42 | 2.97E-02 | 33.00   | 31.25  | 2.91E-01 | 11.85  | 14.92 | 4.27E-01 | 35.27   | 26.14 | 1.77E-01 |
| cg02570171 | -37.02  | 14.24 | 9.35E-03 | -63.74  | 26.03 | 1.44E-02 | 84.06   | 77.63  | 2.79E-01 | -34.21 | 13.93 | 1.40E-02 | -30.42  | 36.34 | 4.03E-01 |
| cg14041976 | -11.09  | 4.27  | 9.35E-03 | -15.12  | 10.34 | 1.44E-01 | -20.02  | 22.64  | 3.77E-01 | -8.34  | 5.12  | 1.04E-01 | -20.07  | 13.44 | 1.35E-01 |
| cg19564093 | -12.36  | 4.76  | 9.35E-03 | -9.23   | 8.75  | 2.91E-01 | -5.89   | 14.71  | 6.89E-01 | -15.12 | 7.11  | 3.34E-02 | -14.78  | 12.19 | 2.26E-01 |
| cg09465746 | 15.45   | 5.94  | 9.35E-03 | 22.31   | 17.02 | 1.90E-01 | 88.76   | 62.40  | 1.55E-01 | 14.98  | 6.83  | 2.83E-02 | 5.15    | 17.82 | 7.72E-01 |
| cg23655651 | 9.29    | 3.57  | 9.35E-03 | 9.74    | 5.56  | 7.97E-02 | 9.56    | 7.56   | 2.06E-01 | 14.38  | 7.56  | 5.72E-02 | -0.59   | 9.54  | 9.50E-01 |
| cg02214188 | 6.97    | 2.68  | 9.35E-03 | 7.50    | 3.43  | 2.86E-02 | 0.52    | 6.22   | 9.33E-01 | 24.81  | 15.67 | 1.13E-01 | 8.99    | 6.45  | 1.63E-01 |

|                |        |       |          |        |       |          |        |        |          |         |       |          |        |       |          |
|----------------|--------|-------|----------|--------|-------|----------|--------|--------|----------|---------|-------|----------|--------|-------|----------|
| cg20904489     | 12.90  | 4.96  | 9.35E-03 | 3.94   | 8.16  | 6.29E-01 | 28.65  | 12.34  | 2.03E-02 | 15.64   | 11.39 | 1.70E-01 | 13.79  | 9.40  | 1.43E-01 |
| cg02417684     | 14.38  | 5.53  | 9.36E-03 | 7.43   | 16.56 | 6.54E-01 | 27.94  | 54.10  | 6.06E-01 | 14.94   | 6.12  | 1.46E-02 | 17.47  | 22.81 | 4.44E-01 |
| cg00292312     | -11.08 | 4.27  | 9.36E-03 | -13.99 | 6.02  | 2.02E-02 | -16.36 | 8.31   | 4.90E-02 | -16.17  | 9.65  | 9.38E-02 | 2.13   | 8.01  | 7.91E-01 |
| cg22872195     | -13.40 | 5.16  | 9.37E-03 | -19.14 | 11.38 | 9.25E-02 | -16.86 | 13.65  | 2.17E-01 | -13.04  | 6.84  | 5.67E-02 | 4.11   | 17.80 | 8.17E-01 |
| cg12670943     | 17.69  | 6.81  | 9.38E-03 | 23.81  | 9.94  | 1.66E-02 | 29.13  | 13.50  | 3.09E-02 | 5.28    | 15.78 | 7.38E-01 | -2.86  | 17.10 | 8.67E-01 |
| cg25225073     | 30.88  | 11.89 | 9.38E-03 | 41.57  | 15.22 | 6.31E-03 | 9.27   | 42.24  | 8.26E-01 | 6.63    | 39.49 | 8.67E-01 | 19.03  | 25.32 | 4.52E-01 |
| cg14780540     | 22.16  | 8.53  | 9.38E-03 | 12.67  | 26.17 | 6.28E-01 | 25.52  | 90.16  | 7.77E-01 | 22.44   | 9.39  | 1.68E-02 | 34.91  | 35.13 | 3.20E-01 |
| cg22357164     | -9.77  | 3.76  | 9.38E-03 | -11.20 | 4.94  | 2.34E-02 | 4.32   | 9.92   | 6.63E-01 | -12.18  | 12.75 | 3.40E-01 | -15.00 | 8.64  | 8.24E-02 |
| cg13965321     | -30.97 | 11.92 | 9.38E-03 | -30.42 | 29.95 | 3.10E-01 | -14.96 | 112.83 | 8.95E-01 | -33.91  | 13.82 | 1.42E-02 | -8.74  | 40.63 | 8.30E-01 |
| ch.8.49616578R | -70.44 | 27.12 | 9.38E-03 | -58.01 | 27.54 | 3.52E-02 | 112.50 | 172.31 | 5.14E-01 | -189.82 | 87.19 | 2.95E-02 | -80.54 | 59.05 | 1.73E-01 |
| cg14384093     | -15.16 | 5.84  | 9.39E-03 | -13.34 | 15.75 | 3.97E-01 | -31.19 | 27.38  | 2.55E-01 | -12.36  | 6.80  | 6.91E-02 | -34.79 | 20.54 | 9.03E-02 |
| cg15019432     | 24.73  | 9.52  | 9.39E-03 | 36.27  | 15.65 | 2.05E-02 | 22.65  | 18.07  | 2.10E-01 | 8.92    | 20.91 | 6.70E-01 | 21.87  | 25.02 | 3.82E-01 |
| cg26954951     | -12.84 | 4.94  | 9.39E-03 | -15.69 | 6.33  | 1.32E-02 | -17.53 | 14.77  | 2.35E-01 | 1.46    | 14.67 | 9.21E-01 | -8.95  | 12.19 | 4.63E-01 |
| cg27555092     | -11.90 | 4.58  | 9.40E-03 | -23.40 | 10.78 | 2.99E-02 | -12.07 | 15.30  | 4.30E-01 | -7.77   | 5.89  | 1.87E-01 | -15.10 | 12.95 | 2.44E-01 |
| cg04782776     | 21.00  | 8.08  | 9.40E-03 | 13.36  | 16.74 | 4.25E-01 | 2.64   | 40.23  | 9.48E-01 | 31.27   | 9.68  | 1.23E-03 | -6.13  | 21.40 | 7.75E-01 |
| cg19542907     | 35.03  | 13.49 | 9.41E-03 | 75.89  | 49.88 | 1.28E-01 | 193.29 | 191.66 | 3.13E-01 | 33.34   | 14.53 | 2.17E-02 | -3.60  | 55.02 | 9.48E-01 |
| cg05048806     | 18.38  | 7.08  | 9.41E-03 | 27.70  | 16.95 | 1.02E-01 | 10.53  | 26.24  | 6.88E-01 | 17.39   | 8.60  | 4.32E-02 | 13.31  | 25.77 | 6.05E-01 |
| cg03109660     | -10.66 | 4.10  | 9.41E-03 | -9.46  | 5.61  | 9.18E-02 | -7.46  | 9.34   | 4.24E-01 | -13.53  | 13.90 | 3.30E-01 | -16.11 | 9.55  | 9.16E-02 |
| cg13543106     | -11.25 | 4.33  | 9.42E-03 | -5.64  | 9.52  | 5.54E-01 | -0.53  | 14.17  | 9.70E-01 | -14.31  | 5.57  | 1.03E-02 | -14.63 | 14.07 | 2.98E-01 |
| cg14613832     | 54.65  | 21.05 | 9.42E-03 | 54.72  | 27.35 | 4.54E-02 | 27.07  | 77.05  | 7.25E-01 | 82.93   | 62.31 | 1.83E-01 | 49.14  | 44.97 | 2.75E-01 |
| cg16874347     | -16.35 | 6.30  | 9.43E-03 | -15.88 | 10.37 | 1.26E-01 | -23.54 | 13.80  | 8.81E-02 | -11.74  | 14.89 | 4.30E-01 | -14.28 | 12.74 | 2.62E-01 |
| cg06401643     | -15.48 | 5.96  | 9.44E-03 | -10.80 | 10.76 | 3.15E-01 | 8.20   | 32.31  | 8.00E-01 | -20.86  | 7.78  | 7.36E-03 | -2.69  | 22.30 | 9.04E-01 |
| cg07106911     | 27.61  | 10.64 | 9.44E-03 | 12.18  | 17.94 | 4.97E-01 | -22.00 | 61.10  | 7.19E-01 | 39.32   | 15.11 | 9.24E-03 | 36.70  | 30.37 | 2.27E-01 |
| cg02184918     | 19.70  | 7.59  | 9.45E-03 | 19.38  | 11.81 | 1.01E-01 | 32.94  | 16.72  | 4.89E-02 | 1.76    | 15.72 | 9.11E-01 | 30.47  | 19.75 | 1.23E-01 |
| cg07297068     | 15.35  | 5.92  | 9.46E-03 | 21.52  | 8.88  | 1.54E-02 | 4.98   | 11.99  | 6.78E-01 | 6.91    | 15.83 | 6.63E-01 | 20.94  | 14.20 | 1.40E-01 |
| cg26397662     | 10.19  | 3.93  | 9.46E-03 | -1.55  | 7.73  | 8.41E-01 | 9.05   | 10.35  | 3.82E-01 | 15.00   | 4.39  | 6.29E-04 | 11.98  | 10.74 | 2.65E-01 |
| cg16175725     | 24.43  | 9.41  | 9.46E-03 | 35.58  | 17.48 | 4.18E-02 | 16.89  | 17.51  | 3.35E-01 | 21.37   | 17.43 | 2.20E-01 | 23.15  | 26.12 | 3.75E-01 |
| cg06534061     | 59.89  | 23.08 | 9.47E-03 | 63.20  | 29.44 | 3.18E-02 | 108.61 | 119.50 | 3.63E-01 | 39.53   | 74.50 | 5.96E-01 | 52.34  | 45.97 | 2.55E-01 |
| cg01412450     | 16.15  | 6.23  | 9.47E-03 | 32.21  | 12.05 | 7.52E-03 | 22.46  | 55.99  | 6.88E-01 | 8.95    | 6.15  | 1.45E-01 | 25.78  | 19.57 | 1.88E-01 |
| cg00791321     | 21.42  | 8.26  | 9.48E-03 | 20.59  | 12.40 | 9.69E-02 | 29.80  | 16.52  | 7.12E-02 | 28.02   | 20.65 | 1.75E-01 | 2.51   | 21.52 | 9.07E-01 |
| cg15646626     | 17.18  | 6.62  | 9.48E-03 | 13.75  | 20.14 | 4.95E-01 | 2.20   | 36.17  | 9.52E-01 | 17.66   | 7.38  | 1.67E-02 | 26.51  | 28.95 | 3.60E-01 |
| cg27443867     | 19.51  | 7.52  | 9.49E-03 | 7.67   | 27.84 | 7.83E-01 | 34.82  | 96.88  | 7.19E-01 | 21.08   | 8.07  | 8.97E-03 | 8.02   | 33.02 | 8.08E-01 |
| cg04558907     | -19.74 | 7.61  | 9.49E-03 | -11.06 | 20.16 | 5.83E-01 | 28.39  | 41.28  | 4.92E-01 | -22.18  | 8.72  | 1.10E-02 | -36.15 | 30.61 | 2.38E-01 |
| cg12982090     | 17.49  | 6.74  | 9.49E-03 | 20.04  | 12.82 | 1.18E-01 | 27.00  | 13.71  | 4.89E-02 | 8.73    | 12.32 | 4.79E-01 | 15.41  | 15.82 | 3.30E-01 |
| cg08947915     | 6.97   | 2.69  | 9.49E-03 | 4.67   | 3.67  | 2.03E-01 | 10.81  | 5.54   | 5.13E-02 | 6.26    | 9.55  | 5.12E-01 | 9.50   | 6.91  | 1.69E-01 |

|            |        |       |          |        |       |          |         |        |          |         |       |          |        |       |          |
|------------|--------|-------|----------|--------|-------|----------|---------|--------|----------|---------|-------|----------|--------|-------|----------|
| cg09522479 | 11.45  | 4.42  | 9.49E-03 | 18.27  | 5.49  | 8.87E-04 | 19.52   | 7.97   | 1.43E-02 | 4.95    | 6.26  | 4.29E-01 | 1.96   | 7.78  | 8.02E-01 |
| cg03291835 | 7.42   | 2.86  | 9.50E-03 | 3.19   | 4.48  | 4.76E-01 | 7.55    | 6.93   | 2.76E-01 | 14.24   | 5.47  | 9.25E-03 | 6.30   | 7.40  | 3.95E-01 |
| cg13099330 | 17.08  | 6.58  | 9.50E-03 | 20.35  | 9.79  | 3.76E-02 | 24.56   | 18.22  | 1.78E-01 | 17.63   | 15.92 | 2.68E-01 | 6.69   | 13.28 | 6.15E-01 |
| cg04880412 | 11.85  | 4.57  | 9.50E-03 | 15.52  | 6.31  | 1.39E-02 | 2.12    | 10.08  | 8.33E-01 | -0.45   | 14.64 | 9.75E-01 | 19.19  | 10.98 | 8.06E-02 |
| cg10112781 | -15.19 | 5.86  | 9.50E-03 | -10.00 | 13.24 | 4.50E-01 | -34.87  | 27.16  | 1.99E-01 | -16.27  | 7.36  | 2.71E-02 | -10.50 | 16.58 | 5.26E-01 |
| cg21123160 | 10.80  | 4.17  | 9.51E-03 | 14.45  | 6.59  | 2.84E-02 | 7.21    | 9.43   | 4.45E-01 | 11.70   | 11.50 | 3.09E-01 | 7.62   | 7.96  | 3.38E-01 |
| cg10435849 | 20.58  | 7.94  | 9.51E-03 | 9.48   | 26.47 | 7.20E-01 | 26.53   | 38.65  | 4.93E-01 | 17.89   | 9.23  | 5.25E-02 | 41.93  | 22.17 | 5.86E-02 |
| cg22532194 | 23.20  | 8.95  | 9.51E-03 | 34.01  | 17.49 | 5.19E-02 | 30.28   | 22.39  | 1.76E-01 | 7.22    | 14.04 | 6.07E-01 | 37.82  | 21.51 | 7.87E-02 |
| cg03653504 | -18.46 | 7.12  | 9.52E-03 | -12.15 | 16.65 | 4.66E-01 | -13.43  | 26.63  | 6.14E-01 | -23.46  | 8.87  | 8.16E-03 | -1.54  | 22.42 | 9.45E-01 |
| cg26053358 | 21.23  | 8.19  | 9.52E-03 | 24.47  | 18.01 | 1.74E-01 | 28.03   | 17.48  | 1.09E-01 | 13.40   | 11.75 | 2.54E-01 | 39.75  | 27.51 | 1.49E-01 |
| cg06672737 | 9.89   | 3.81  | 9.52E-03 | 11.45  | 5.69  | 4.41E-02 | 17.75   | 10.22  | 8.25E-02 | 1.83    | 8.42  | 8.28E-01 | 9.18   | 8.39  | 2.74E-01 |
| cg23189410 | 10.21  | 3.94  | 9.52E-03 | 12.42  | 6.81  | 6.83E-02 | 11.08   | 9.07   | 2.22E-01 | 7.35    | 8.11  | 3.65E-01 | 9.27   | 8.02  | 2.47E-01 |
| cg00544674 | -9.84  | 3.79  | 9.52E-03 | -6.51  | 7.35  | 3.75E-01 | -4.97   | 14.20  | 7.26E-01 | -10.88  | 5.16  | 3.49E-02 | -15.37 | 10.91 | 1.59E-01 |
| cg05506209 | 45.69  | 17.62 | 9.53E-03 | 61.77  | 23.12 | 7.54E-03 | 74.36   | 68.77  | 2.80E-01 | 24.73   | 49.13 | 6.15E-01 | 7.69   | 37.19 | 8.36E-01 |
| cg13796319 | 35.13  | 13.55 | 9.53E-03 | 36.10  | 44.84 | 4.21E-01 | 165.22  | 164.08 | 3.14E-01 | 32.03   | 14.79 | 3.03E-02 | 61.40  | 54.43 | 2.59E-01 |
| cg04830316 | -12.00 | 4.63  | 9.53E-03 | -12.97 | 7.08  | 6.71E-02 | -14.66  | 10.77  | 1.73E-01 | -6.09   | 11.78 | 6.05E-01 | -12.01 | 9.56  | 2.09E-01 |
| cg02494664 | 36.96  | 14.26 | 9.53E-03 | 44.78  | 16.23 | 5.81E-03 | 39.89   | 70.93  | 5.74E-01 | -58.07  | 78.66 | 4.60E-01 | 17.47  | 36.17 | 6.29E-01 |
| cg04808813 | 72.94  | 28.14 | 9.53E-03 | 70.53  | 37.62 | 6.08E-02 | 97.10   | 123.91 | 4.33E-01 | 88.55   | 67.04 | 1.87E-01 | 60.50  | 60.98 | 3.21E-01 |
| cg12104133 | 21.07  | 8.13  | 9.53E-03 | 13.40  | 14.19 | 3.45E-01 | 34.78   | 16.02  | 2.99E-02 | 3.09    | 18.71 | 8.69E-01 | 31.58  | 17.10 | 6.48E-02 |
| cg11653966 | -7.77  | 3.00  | 9.54E-03 | -6.98  | 4.14  | 9.19E-02 | -7.99   | 6.99   | 2.53E-01 | -8.00   | 13.30 | 5.48E-01 | -9.28  | 6.11  | 1.29E-01 |
| cg02614660 | 14.63  | 5.65  | 9.54E-03 | 11.88  | 8.30  | 1.52E-01 | 23.14   | 12.53  | 6.47E-02 | 15.49   | 17.67 | 3.81E-01 | 12.31  | 11.72 | 2.94E-01 |
| cg08555772 | -42.92 | 16.56 | 9.54E-03 | -38.99 | 21.59 | 7.09E-02 | -70.50  | 45.71  | 1.23E-01 | -52.30  | 57.88 | 3.66E-01 | -32.47 | 37.13 | 3.82E-01 |
| cg18035537 | -52.33 | 20.19 | 9.54E-03 | -1.48  | 65.37 | 9.82E-01 | -289.08 | 235.52 | 2.20E-01 | -62.90  | 19.26 | 1.09E-03 | 29.71  | 75.24 | 6.93E-01 |
| cg10522770 | 11.96  | 4.62  | 9.55E-03 | 14.50  | 6.31  | 2.16E-02 | 8.68    | 11.36  | 4.45E-01 | 27.10   | 14.83 | 6.75E-02 | 0.74   | 10.23 | 9.42E-01 |
| cg22353823 | 5.18   | 2.00  | 9.55E-03 | 7.82   | 2.92  | 7.35E-03 | 5.49    | 4.23   | 1.95E-01 | 2.96    | 5.74  | 6.07E-01 | -0.40  | 4.64  | 9.31E-01 |
| cg02877433 | 25.95  | 10.01 | 9.55E-03 | 39.49  | 17.66 | 2.54E-02 | 10.33   | 21.33  | 6.28E-01 | 20.79   | 18.04 | 2.49E-01 | 30.44  | 25.82 | 2.38E-01 |
| cg11689732 | 31.62  | 12.20 | 9.55E-03 | 31.78  | 19.23 | 9.85E-02 | 60.21   | 28.38  | 3.39E-02 | 34.48   | 25.83 | 1.82E-01 | 0.06   | 28.01 | 9.98E-01 |
| cg11223003 | 36.55  | 14.10 | 9.56E-03 | 46.56  | 33.24 | 1.61E-01 | -204.76 | 137.27 | 1.36E-01 | 36.90   | 14.13 | 9.00E-03 | 42.19  | 42.02 | 3.15E-01 |
| cg10994263 | -11.77 | 4.54  | 9.56E-03 | -9.73  | 9.64  | 3.13E-01 | 4.59    | 14.83  | 7.57E-01 | -17.64  | 6.02  | 3.40E-03 | -0.07  | 13.34 | 9.96E-01 |
| cg11612647 | -13.31 | 5.14  | 9.56E-03 | -11.95 | 7.33  | 1.03E-01 | -15.08  | 14.03  | 2.82E-01 | -4.15   | 12.08 | 7.31E-01 | -24.08 | 11.66 | 3.89E-02 |
| cg26926973 | -74.61 | 28.79 | 9.56E-03 | -63.54 | 36.82 | 8.45E-02 | 8.13    | 213.92 | 9.70E-01 | -171.91 | 69.69 | 1.36E-02 | -32.86 | 64.44 | 6.10E-01 |
| cg21017887 | 11.48  | 4.43  | 9.57E-03 | 11.07  | 11.84 | 3.50E-01 | 22.56   | 26.50  | 3.95E-01 | 10.17   | 5.10  | 4.60E-02 | 21.14  | 16.04 | 1.87E-01 |
| cg06801028 | 7.59   | 2.93  | 9.57E-03 | 6.47   | 3.82  | 9.00E-02 | 10.55   | 6.79   | 1.21E-01 | 11.25   | 10.93 | 3.03E-01 | 6.60   | 7.50  | 3.79E-01 |
| cg17112108 | -15.96 | 6.16  | 9.57E-03 | -27.19 | 11.46 | 1.76E-02 | 4.13    | 14.80  | 7.80E-01 | -19.68  | 13.02 | 1.31E-01 | -14.04 | 11.00 | 2.02E-01 |
| cg02512540 | -23.34 | 9.01  | 9.58E-03 | -1.13  | 19.76 | 9.55E-01 | 12.96   | 46.06  | 7.78E-01 | -33.22  | 11.15 | 2.88E-03 | -18.87 | 28.42 | 5.07E-01 |

|            |        |       |          |        |       |          |         |        |          |         |       |          |        |       |          |
|------------|--------|-------|----------|--------|-------|----------|---------|--------|----------|---------|-------|----------|--------|-------|----------|
| cg24259363 | -13.39 | 5.17  | 9.58E-03 | -18.58 | 7.78  | 1.69E-02 | -21.19  | 12.47  | 8.93E-02 | -4.13   | 12.46 | 7.40E-01 | -3.93  | 11.13 | 7.24E-01 |
| cg04850731 | 23.84  | 9.20  | 9.58E-03 | 49.64  | 20.36 | 1.48E-02 | 34.75   | 50.57  | 4.92E-01 | 12.96   | 11.49 | 2.59E-01 | 34.92  | 26.40 | 1.86E-01 |
| cg10278025 | -10.94 | 4.22  | 9.58E-03 | -14.83 | 6.57  | 2.40E-02 | 1.75    | 8.95   | 8.45E-01 | -15.71  | 10.31 | 1.28E-01 | -13.07 | 9.53  | 1.70E-01 |
| cg07314148 | 25.18  | 9.72  | 9.58E-03 | 27.67  | 11.82 | 1.92E-02 | 3.08    | 39.96  | 9.39E-01 | 50.66   | 58.02 | 3.83E-01 | 20.56  | 19.98 | 3.04E-01 |
| cg04454086 | 14.37  | 5.55  | 9.59E-03 | 22.37  | 10.65 | 3.57E-02 | 6.76    | 10.76  | 5.30E-01 | 25.92   | 9.53  | 6.50E-03 | 4.60   | 8.28  | 5.78E-01 |
| cg19701577 | 22.21  | 8.58  | 9.59E-03 | 28.06  | 19.65 | 1.53E-01 | -17.67  | 48.30  | 7.15E-01 | 24.25   | 10.33 | 1.88E-02 | 7.92   | 28.85 | 7.84E-01 |
| cg01033356 | 7.12   | 2.75  | 9.59E-03 | 9.11   | 3.82  | 1.71E-02 | 1.94    | 6.28   | 7.58E-01 | -2.12   | 9.13  | 8.17E-01 | 11.13  | 6.15  | 7.05E-02 |
| cg10316857 | -13.93 | 5.38  | 9.60E-03 | -21.99 | 11.23 | 5.01E-02 | -1.42   | 17.81  | 9.36E-01 | -11.18  | 7.35  | 1.28E-01 | -19.25 | 14.19 | 1.75E-01 |
| cg00255135 | 28.08  | 10.84 | 9.60E-03 | 34.36  | 14.32 | 1.64E-02 | 32.54   | 41.19  | 4.30E-01 | 13.15   | 32.34 | 6.84E-01 | 18.98  | 21.91 | 3.86E-01 |
| cg12158993 | 24.04  | 9.28  | 9.60E-03 | 24.69  | 13.19 | 6.13E-02 | 20.06   | 26.80  | 4.54E-01 | 30.27   | 25.40 | 2.33E-01 | 21.35  | 18.51 | 2.49E-01 |
| cg24194730 | 21.39  | 8.26  | 9.61E-03 | 32.75  | 12.41 | 8.33E-03 | 1.53    | 17.70  | 9.31E-01 | 9.78    | 17.49 | 5.76E-01 | 37.68  | 24.25 | 1.20E-01 |
| cg04468281 | 13.72  | 5.30  | 9.63E-03 | 13.39  | 8.46  | 1.14E-01 | 11.80   | 12.66  | 3.51E-01 | 20.28   | 9.73  | 3.71E-02 | 2.81   | 14.41 | 8.45E-01 |
| cg12691229 | 13.20  | 5.10  | 9.63E-03 | 17.37  | 7.17  | 1.54E-02 | 19.45   | 12.47  | 1.19E-01 | -0.60   | 20.79 | 9.77E-01 | 4.47   | 9.88  | 6.51E-01 |
| cg06483699 | 29.74  | 11.49 | 9.63E-03 | 68.92  | 35.08 | 4.95E-02 | 27.34   | 161.27 | 8.65E-01 | 26.94   | 12.52 | 3.15E-02 | -10.02 | 53.52 | 8.52E-01 |
| cg17693604 | 11.32  | 4.37  | 9.64E-03 | 9.20   | 6.12  | 1.32E-01 | 19.31   | 8.58   | 2.44E-02 | 24.78   | 16.87 | 1.42E-01 | -0.41  | 10.87 | 9.70E-01 |
| cg11550126 | 45.70  | 17.65 | 9.64E-03 | 62.06  | 21.75 | 4.33E-03 | -22.97  | 99.29  | 8.17E-01 | 39.88   | 72.88 | 5.84E-01 | 12.76  | 35.24 | 7.17E-01 |
| cg22537081 | -56.99 | 22.02 | 9.65E-03 | -47.98 | 26.27 | 6.78E-02 | -173.57 | 167.78 | 3.01E-01 | -102.13 | 75.58 | 1.77E-01 | -59.51 | 49.82 | 2.32E-01 |
| cg26019498 | 18.42  | 7.12  | 9.65E-03 | 34.69  | 16.61 | 3.67E-02 | 18.61   | 32.52  | 5.67E-01 | 15.40   | 8.64  | 7.46E-02 | 7.84   | 23.76 | 7.42E-01 |
| cg22110213 | -22.49 | 8.69  | 9.65E-03 | -30.32 | 23.20 | 1.91E-01 | 19.28   | 34.85  | 5.80E-01 | -27.17  | 10.19 | 7.67E-03 | 4.58   | 32.78 | 8.89E-01 |
| cg00892737 | 24.44  | 9.45  | 9.66E-03 | 31.38  | 21.15 | 1.38E-01 | 24.39   | 25.34  | 3.36E-01 | 15.88   | 12.67 | 2.10E-01 | 56.48  | 29.05 | 5.19E-02 |
| cg10332321 | 19.59  | 7.57  | 9.66E-03 | 25.82  | 14.15 | 6.79E-02 | -0.77   | 24.29  | 9.75E-01 | 15.45   | 10.65 | 1.47E-01 | 40.04  | 22.67 | 7.74E-02 |
| cg26027526 | -6.93  | 2.68  | 9.66E-03 | -5.78  | 4.39  | 1.88E-01 | -0.75   | 5.47   | 8.91E-01 | -10.76  | 5.22  | 3.91E-02 | -14.06 | 7.56  | 6.29E-02 |
| cg06139239 | -11.54 | 4.46  | 9.66E-03 | -18.47 | 9.57  | 5.37E-02 | -11.24  | 14.12  | 4.26E-01 | -9.49   | 6.08  | 1.19E-01 | -8.99  | 11.66 | 4.41E-01 |
| cg24271863 | 23.19  | 8.96  | 9.66E-03 | 24.13  | 13.59 | 7.59E-02 | 18.22   | 23.51  | 4.38E-01 | 35.26   | 20.77 | 8.96E-02 | 14.93  | 18.53 | 4.20E-01 |
| cg23817981 | 26.12  | 10.09 | 9.67E-03 | 37.47  | 14.42 | 9.38E-03 | 35.30   | 32.91  | 2.84E-01 | 49.65   | 53.02 | 3.49E-01 | 6.97   | 16.38 | 6.71E-01 |
| cg19531536 | -9.81  | 3.79  | 9.67E-03 | -8.90  | 5.55  | 1.09E-01 | -14.42  | 8.88   | 1.04E-01 | -1.21   | 9.47  | 8.99E-01 | -14.84 | 8.67  | 8.70E-02 |
| cg09940032 | 14.24  | 5.51  | 9.68E-03 | 19.04  | 9.87  | 5.38E-02 | 15.58   | 14.05  | 2.68E-01 | 13.88   | 9.30  | 1.35E-01 | 5.75   | 12.80 | 6.53E-01 |
| cg00747890 | 26.86  | 10.38 | 9.68E-03 | 32.67  | 13.88 | 1.86E-02 | 15.30   | 27.05  | 5.72E-01 | 8.65    | 31.38 | 7.83E-01 | 29.31  | 24.23 | 2.26E-01 |
| cg15174823 | 37.00  | 14.31 | 9.69E-03 | 29.14  | 19.24 | 1.30E-01 | 13.50   | 84.29  | 8.73E-01 | 4.68    | 45.05 | 9.17E-01 | 63.10  | 25.39 | 1.30E-02 |
| cg18498035 | 27.57  | 10.66 | 9.69E-03 | 38.07  | 38.05 | 3.17E-01 | 86.37   | 138.00 | 5.31E-01 | 23.38   | 11.42 | 4.07E-02 | 82.73  | 50.33 | 1.00E-01 |
| cg26121591 | 12.72  | 4.92  | 9.70E-03 | 20.58  | 15.94 | 1.97E-01 | 57.70   | 45.38  | 2.04E-01 | 11.87   | 5.52  | 3.15E-02 | 6.67   | 15.55 | 6.68E-01 |
| cg22960952 | -10.79 | 4.17  | 9.70E-03 | -15.34 | 6.99  | 2.82E-02 | -0.89   | 10.15  | 9.30E-01 | -12.59  | 7.99  | 1.15E-01 | -8.63  | 9.28  | 3.53E-01 |
| cg21704448 | -11.91 | 4.60  | 9.70E-03 | -11.29 | 11.34 | 3.20E-01 | -23.40  | 18.25  | 2.00E-01 | -10.82  | 5.53  | 5.03E-02 | -13.47 | 16.46 | 4.13E-01 |
| cg00806680 | -18.98 | 7.34  | 9.71E-03 | -6.87  | 19.00 | 7.18E-01 | -45.70  | 28.00  | 1.03E-01 | -19.24  | 8.71  | 2.73E-02 | -16.10 | 27.29 | 5.55E-01 |
| cg25113589 | 20.39  | 7.89  | 9.72E-03 | 44.07  | 21.90 | 4.42E-02 | 42.89   | 37.41  | 2.52E-01 | 14.60   | 9.05  | 1.06E-01 | 25.39  | 30.72 | 4.08E-01 |

|            |        |       |          |        |       |          |        |        |          |         |       |          |        |       |          |
|------------|--------|-------|----------|--------|-------|----------|--------|--------|----------|---------|-------|----------|--------|-------|----------|
| cg06358171 | 7.15   | 2.76  | 9.72E-03 | 9.99   | 4.20  | 1.73E-02 | 10.59  | 6.20   | 8.78E-02 | 3.13    | 7.12  | 6.60E-01 | 1.12   | 5.93  | 8.50E-01 |
| cg23015361 | -8.98  | 3.47  | 9.72E-03 | -11.65 | 5.97  | 5.12E-02 | -4.05  | 10.28  | 6.93E-01 | -7.65   | 5.23  | 1.44E-01 | -11.30 | 10.61 | 2.87E-01 |
| cg16681349 | 17.58  | 6.80  | 9.72E-03 | 24.11  | 14.48 | 9.59E-02 | 0.97   | 28.63  | 9.73E-01 | 15.00   | 8.29  | 7.05E-02 | 41.96  | 30.21 | 1.65E-01 |
| cg20932516 | -16.00 | 6.19  | 9.73E-03 | -23.22 | 18.50 | 2.10E-01 | -54.20 | 28.71  | 5.91E-02 | -14.62  | 7.10  | 3.94E-02 | 2.92   | 21.80 | 8.94E-01 |
| cg10797557 | 54.13  | 20.94 | 9.73E-03 | 58.70  | 26.15 | 2.48E-02 | 3.07   | 91.51  | 9.73E-01 | 121.16  | 72.83 | 9.62E-02 | 28.22  | 44.26 | 5.24E-01 |
| cg25417766 | 10.92  | 4.22  | 9.73E-03 | 16.01  | 5.74  | 5.31E-03 | 2.87   | 10.04  | 7.75E-01 | 17.59   | 16.18 | 2.77E-01 | 2.58   | 9.13  | 7.78E-01 |
| cg05694021 | 10.20  | 3.95  | 9.74E-03 | 11.78  | 5.59  | 3.53E-02 | 9.12   | 8.15   | 2.63E-01 | 21.58   | 14.66 | 1.41E-01 | 3.27   | 8.92  | 7.14E-01 |
| cg07802350 | 17.51  | 6.77  | 9.74E-03 | 3.31   | 24.03 | 8.90E-01 | -35.25 | 69.72  | 6.13E-01 | 20.36   | 7.32  | 5.43E-03 | 2.80   | 28.82 | 9.23E-01 |
| cg16592453 | 21.90  | 8.47  | 9.74E-03 | 16.49  | 17.21 | 3.38E-01 | 55.84  | 64.19  | 3.84E-01 | 23.73   | 10.33 | 2.16E-02 | 14.34  | 32.62 | 6.60E-01 |
| cg07452306 | 15.48  | 5.99  | 9.74E-03 | 21.47  | 9.17  | 1.92E-02 | 18.63  | 13.22  | 1.59E-01 | 18.19   | 14.11 | 1.97E-01 | -4.07  | 13.78 | 7.68E-01 |
| cg19356179 | 21.54  | 8.33  | 9.74E-03 | 35.52  | 21.08 | 9.20E-02 | 41.50  | 29.48  | 1.59E-01 | 13.08   | 8.37  | 1.18E-01 | 58.96  | 32.41 | 6.89E-02 |
| cg22559669 | -37.07 | 14.34 | 9.75E-03 | -88.05 | 33.59 | 8.77E-03 | -15.86 | 195.65 | 9.35E-01 | -26.18  | 16.61 | 1.15E-01 | -21.18 | 55.57 | 7.03E-01 |
| cg02995055 | -22.79 | 8.82  | 9.75E-03 | -30.63 | 12.13 | 1.16E-02 | -10.48 | 22.21  | 6.37E-01 | 5.37    | 37.25 | 8.85E-01 | -20.40 | 17.36 | 2.40E-01 |
| cg17133056 | 38.09  | 14.74 | 9.75E-03 | 35.18  | 21.41 | 1.00E-01 | 33.77  | 32.41  | 2.98E-01 | 55.87   | 37.65 | 1.38E-01 | 35.36  | 36.14 | 3.28E-01 |
| cg10114372 | 63.25  | 24.47 | 9.75E-03 | 79.42  | 49.09 | 1.06E-01 | 20.78  | 200.89 | 9.18E-01 | 71.82   | 31.61 | 2.31E-02 | 1.08   | 66.06 | 9.87E-01 |
| cg01757116 | -9.39  | 3.63  | 9.75E-03 | -3.83  | 7.90  | 6.28E-01 | -14.84 | 12.14  | 2.22E-01 | -9.41   | 4.78  | 4.93E-02 | -14.95 | 10.41 | 1.51E-01 |
| cg06317622 | -52.68 | 20.38 | 9.76E-03 | -50.66 | 27.10 | 6.16E-02 | -39.66 | 61.76  | 5.21E-01 | -12.79  | 74.12 | 8.63E-01 | -75.03 | 40.79 | 6.59E-02 |
| cg19360907 | 12.03  | 4.66  | 9.76E-03 | 15.40  | 6.19  | 1.29E-02 | -1.37  | 15.73  | 9.31E-01 | 7.58    | 15.06 | 6.15E-01 | 10.81  | 9.28  | 2.44E-01 |
| cg04972065 | 9.91   | 3.84  | 9.76E-03 | 12.86  | 5.68  | 2.37E-02 | 16.12  | 8.23   | 5.02E-02 | -4.04   | 10.99 | 7.13E-01 | 5.09   | 8.47  | 5.48E-01 |
| cg16388178 | 14.65  | 5.67  | 9.77E-03 | 16.08  | 8.58  | 6.09E-02 | 10.24  | 11.28  | 3.64E-01 | 14.73   | 18.96 | 4.37E-01 | 16.82  | 12.05 | 1.63E-01 |
| cg15440661 | 9.26   | 3.58  | 9.77E-03 | 9.27   | 4.76  | 5.17E-02 | 12.02  | 7.58   | 1.13E-01 | -0.21   | 11.47 | 9.85E-01 | 11.94  | 10.67 | 2.63E-01 |
| cg09440340 | -19.55 | 7.57  | 9.77E-03 | -26.40 | 11.46 | 2.12E-02 | -7.87  | 16.47  | 6.33E-01 | -6.65   | 18.82 | 7.24E-01 | -27.70 | 17.29 | 1.09E-01 |
| cg07620167 | 9.04   | 3.50  | 9.78E-03 | 4.52   | 4.88  | 3.55E-01 | 16.80  | 6.56   | 1.04E-02 | -0.38   | 11.80 | 9.74E-01 | 13.21  | 7.75  | 8.84E-02 |
| cg19731276 | 19.10  | 7.39  | 9.78E-03 | 6.76   | 23.65 | 7.75E-01 | 20.99  | 29.11  | 4.71E-01 | 19.11   | 8.27  | 2.09E-02 | 46.31  | 37.28 | 2.14E-01 |
| cg08588414 | 21.01  | 8.13  | 9.78E-03 | 18.80  | 14.85 | 2.06E-01 | 15.10  | 38.69  | 6.96E-01 | 18.02   | 10.95 | 9.99E-02 | 45.69  | 25.18 | 6.96E-02 |
| cg11624728 | -8.69  | 3.36  | 9.78E-03 | -5.47  | 5.70  | 3.37E-01 | -6.93  | 7.82   | 3.76E-01 | -11.33  | 6.52  | 8.22E-02 | -12.43 | 7.52  | 9.85E-02 |
| cg12419195 | 27.41  | 10.61 | 9.78E-03 | 28.89  | 35.55 | 4.16E-01 | -60.14 | 132.02 | 6.49E-01 | 27.87   | 11.47 | 1.51E-02 | 28.23  | 47.91 | 5.56E-01 |
| cg12146709 | 15.79  | 6.11  | 9.79E-03 | 10.30  | 9.09  | 2.57E-01 | 25.45  | 11.07  | 2.15E-02 | 33.12   | 22.18 | 1.35E-01 | 5.15   | 14.94 | 7.30E-01 |
| cg27299712 | -16.24 | 6.29  | 9.79E-03 | -12.09 | 9.55  | 2.05E-01 | -24.99 | 15.24  | 1.01E-01 | -20.33  | 13.87 | 1.43E-01 | -13.46 | 14.39 | 3.50E-01 |
| cg22613905 | -50.01 | 19.36 | 9.79E-03 | -70.54 | 29.29 | 1.60E-02 | 40.08  | 99.97  | 6.89E-01 | -63.79  | 37.61 | 8.98E-02 | -14.52 | 37.93 | 7.02E-01 |
| cg04400131 | -13.02 | 5.04  | 9.79E-03 | -16.95 | 11.18 | 1.29E-01 | 2.34   | 16.29  | 8.86E-01 | -11.17  | 6.68  | 9.46E-02 | -26.06 | 13.87 | 6.02E-02 |
| cg26269038 | 18.30  | 7.08  | 9.79E-03 | 10.62  | 15.20 | 4.85E-01 | 37.29  | 13.72  | 6.57E-03 | 6.69    | 11.95 | 5.76E-01 | 21.19  | 15.17 | 1.63E-01 |
| cg14216672 | -67.52 | 26.14 | 9.80E-03 | -41.20 | 36.81 | 2.63E-01 | -5.92  | 109.55 | 9.57E-01 | -112.98 | 53.71 | 3.54E-02 | -97.28 | 58.18 | 9.45E-02 |
| cg16786297 | -13.58 | 5.26  | 9.80E-03 | -7.51  | 13.67 | 5.83E-01 | -28.88 | 32.22  | 3.70E-01 | -10.41  | 6.28  | 9.71E-02 | -35.69 | 14.99 | 1.73E-02 |
| cg20130213 | 19.23  | 7.45  | 9.80E-03 | 25.09  | 11.27 | 2.59E-02 | 24.71  | 18.91  | 1.91E-01 | 10.35   | 32.74 | 7.52E-01 | 10.95  | 12.47 | 3.80E-01 |

|            |        |       |          |        |       |          |         |        |          |        |       |          |        |       |          |
|------------|--------|-------|----------|--------|-------|----------|---------|--------|----------|--------|-------|----------|--------|-------|----------|
| cg14585694 | 44.96  | 17.41 | 9.80E-03 | 73.56  | 45.61 | 1.07E-01 | -147.13 | 150.81 | 3.29E-01 | 38.30  | 20.23 | 5.83E-02 | 78.23  | 55.02 | 1.55E-01 |
| cg15252509 | -9.05  | 3.50  | 9.81E-03 | -12.82 | 6.38  | 4.47E-02 | -9.29   | 10.27  | 3.66E-01 | -5.39  | 4.99  | 2.80E-01 | -16.15 | 11.68 | 1.67E-01 |
| cg16581097 | 51.67  | 20.01 | 9.81E-03 | 42.03  | 27.65 | 1.28E-01 | 10.17   | 58.62  | 8.62E-01 | 72.46  | 50.01 | 1.47E-01 | 84.47  | 44.76 | 5.91E-02 |
| cg24231854 | 9.47   | 3.67  | 9.81E-03 | 13.87  | 5.25  | 8.29E-03 | 11.16   | 8.10   | 1.69E-01 | 0.51   | 12.92 | 9.68E-01 | 1.70   | 7.68  | 8.24E-01 |
| cg16598600 | 14.30  | 5.54  | 9.82E-03 | 15.18  | 9.33  | 1.04E-01 | 7.42    | 11.42  | 5.16E-01 | 24.41  | 13.32 | 6.69E-02 | 12.48  | 11.30 | 2.69E-01 |
| cg14353162 | 54.40  | 21.07 | 9.82E-03 | 50.09  | 27.03 | 6.38E-02 | 125.70  | 79.50  | 1.14E-01 | 74.12  | 68.73 | 2.81E-01 | 35.81  | 44.11 | 4.17E-01 |
| cg03038233 | 19.03  | 7.37  | 9.82E-03 | 11.62  | 13.49 | 3.89E-01 | -3.92   | 30.66  | 8.98E-01 | 26.77  | 10.28 | 9.24E-03 | 15.66  | 20.43 | 4.43E-01 |
| cg13372927 | 28.36  | 10.99 | 9.83E-03 | 19.47  | 17.31 | 2.61E-01 | -67.05  | 68.17  | 3.25E-01 | 39.72  | 16.03 | 1.32E-02 | 35.50  | 34.52 | 3.04E-01 |
| cg18758339 | -20.75 | 8.04  | 9.83E-03 | -28.04 | 20.94 | 1.80E-01 | -21.99  | 41.61  | 5.97E-01 | -21.69 | 9.27  | 1.93E-02 | 7.59   | 31.61 | 8.10E-01 |
| cg12506005 | 29.93  | 11.59 | 9.83E-03 | 53.28  | 26.07 | 4.10E-02 | 16.61   | 53.45  | 7.56E-01 | 19.35  | 14.67 | 1.87E-01 | 50.00  | 32.08 | 1.19E-01 |
| cg18280830 | 13.99  | 5.42  | 9.83E-03 | 17.83  | 8.55  | 3.71E-02 | -0.71   | 12.94  | 9.56E-01 | 13.10  | 13.05 | 3.16E-01 | 18.71  | 10.81 | 8.34E-02 |
| cg09105802 | 28.02  | 10.85 | 9.83E-03 | 35.90  | 25.86 | 1.65E-01 | 12.43   | 48.77  | 7.99E-01 | 27.37  | 13.39 | 4.09E-02 | 26.39  | 31.64 | 4.04E-01 |
| cg23982890 | 16.80  | 6.51  | 9.83E-03 | 12.81  | 12.43 | 3.03E-01 | 9.69    | 12.01  | 4.20E-01 | 17.20  | 11.39 | 1.31E-01 | 45.55  | 19.98 | 2.26E-02 |
| cg07812877 | 26.50  | 10.27 | 9.83E-03 | 41.91  | 21.82 | 5.48E-02 | 3.82    | 54.88  | 9.45E-01 | 22.88  | 13.01 | 7.87E-02 | 23.50  | 29.47 | 4.25E-01 |
| cg07855639 | -15.48 | 6.00  | 9.83E-03 | -10.76 | 8.64  | 2.13E-01 | -10.32  | 17.06  | 5.45E-01 | -37.06 | 16.88 | 2.81E-02 | -16.16 | 11.55 | 1.62E-01 |
| cg20894145 | 21.45  | 8.31  | 9.83E-03 | 27.71  | 16.33 | 8.97E-02 | 46.31   | 19.63  | 1.83E-02 | 8.50   | 12.48 | 4.96E-01 | 18.62  | 24.11 | 4.40E-01 |
| cg04115307 | -8.30  | 3.21  | 9.84E-03 | -5.49  | 4.44  | 2.16E-01 | -8.85   | 7.26   | 2.23E-01 | -9.32  | 9.72  | 3.38E-01 | -15.65 | 7.79  | 4.44E-02 |
| cg11611320 | -13.52 | 5.24  | 9.84E-03 | -22.24 | 11.31 | 4.92E-02 | 5.55    | 14.91  | 7.10E-01 | -16.49 | 6.14  | 7.21E-03 | 1.92   | 18.09 | 9.15E-01 |
| cg17831467 | 53.95  | 20.90 | 9.84E-03 | 62.52  | 53.08 | 2.39E-01 | -182.82 | 212.68 | 3.90E-01 | 57.19  | 24.05 | 1.74E-02 | 35.30  | 73.97 | 6.33E-01 |
| cg17242490 | 22.57  | 8.74  | 9.84E-03 | 30.30  | 22.79 | 1.84E-01 | 41.16   | 29.48  | 1.63E-01 | 16.17  | 10.61 | 1.27E-01 | 41.14  | 29.99 | 1.70E-01 |
| cg04453677 | 28.26  | 10.95 | 9.84E-03 | 42.76  | 33.16 | 1.97E-01 | 1.70    | 107.80 | 9.87E-01 | 28.65  | 12.25 | 1.93E-02 | 8.34   | 38.43 | 8.28E-01 |
| cg09577907 | -15.15 | 5.87  | 9.84E-03 | -19.67 | 10.95 | 7.25E-02 | -1.86   | 21.58  | 9.31E-01 | -18.54 | 8.61  | 3.14E-02 | -4.33  | 14.07 | 7.58E-01 |
| cg02147791 | 52.00  | 20.15 | 9.84E-03 | 42.70  | 25.39 | 9.26E-02 | -49.46  | 108.78 | 6.49E-01 | 72.42  | 80.21 | 3.67E-01 | 81.48  | 38.55 | 3.46E-02 |
| cg24739407 | -7.42  | 2.88  | 9.85E-03 | -10.79 | 4.93  | 2.88E-02 | -9.89   | 6.45   | 1.25E-01 | -4.65  | 5.31  | 3.81E-01 | -2.55  | 7.02  | 7.17E-01 |
| cg02526522 | -28.17 | 10.91 | 9.85E-03 | -24.31 | 14.06 | 8.38E-02 | 18.94   | 44.80  | 6.72E-01 | -30.16 | 54.32 | 5.79E-01 | -45.12 | 20.01 | 2.41E-02 |
| cg06534800 | 23.77  | 9.21  | 9.86E-03 | 25.44  | 17.23 | 1.40E-01 | 29.61   | 17.04  | 8.22E-02 | 14.54  | 16.63 | 3.82E-01 | 29.40  | 27.13 | 2.78E-01 |
| cg03828603 | 21.98  | 8.52  | 9.86E-03 | 21.42  | 10.44 | 4.03E-02 | 34.46   | 29.52  | 2.43E-01 | 79.02  | 59.75 | 1.86E-01 | 14.09  | 17.71 | 4.26E-01 |
| cg01381171 | 23.30  | 9.03  | 9.87E-03 | 42.49  | 27.93 | 1.28E-01 | -4.67   | 140.07 | 9.73E-01 | 20.33  | 9.77  | 3.75E-02 | 40.58  | 46.67 | 3.85E-01 |
| cg00832703 | -19.54 | 7.57  | 9.87E-03 | -26.33 | 21.11 | 2.12E-01 | -58.39  | 39.32  | 1.38E-01 | -13.41 | 8.72  | 1.24E-01 | -48.80 | 26.93 | 7.00E-02 |
| cg01031251 | 10.76  | 4.17  | 9.87E-03 | 11.10  | 5.65  | 4.96E-02 | 19.34   | 9.65   | 4.50E-02 | 6.48   | 11.53 | 5.74E-01 | 1.89   | 11.19 | 8.66E-01 |
| cg17085123 | -10.79 | 4.18  | 9.88E-03 | -8.91  | 5.61  | 1.13E-01 | -8.97   | 10.88  | 4.10E-01 | 0.04   | 17.02 | 9.98E-01 | -19.12 | 8.60  | 2.62E-02 |
| cg17133833 | -16.28 | 6.31  | 9.88E-03 | -29.59 | 13.44 | 2.76E-02 | -17.48  | 26.90  | 5.16E-01 | -12.49 | 8.09  | 1.23E-01 | -10.28 | 18.53 | 5.79E-01 |
| cg15591578 | 20.88  | 8.09  | 9.89E-03 | 21.04  | 17.61 | 2.32E-01 | -7.55   | 56.11  | 8.93E-01 | 22.16  | 9.71  | 2.25E-02 | 16.35  | 29.96 | 5.85E-01 |
| cg08483980 | 21.80  | 8.45  | 9.89E-03 | 33.53  | 14.76 | 2.30E-02 | 8.92    | 15.60  | 5.67E-01 | 24.99  | 16.91 | 1.39E-01 | 15.08  | 23.57 | 5.22E-01 |
| cg21911861 | 45.37  | 17.59 | 9.90E-03 | 55.14  | 25.60 | 3.13E-02 | 3.83    | 108.59 | 9.72E-01 | 25.52  | 11.98 | 3.31E-02 | 110.03 | 42.14 | 9.02E-03 |

|            |        |       |          |        |       |          |         |        |          |         |       |          |         |       |          |
|------------|--------|-------|----------|--------|-------|----------|---------|--------|----------|---------|-------|----------|---------|-------|----------|
| cg14864276 | -81.11 | 31.45 | 9.91E-03 | -58.16 | 33.87 | 8.60E-02 | 58.36   | 128.78 | 6.50E-01 | -160.31 | 49.94 | 1.33E-03 | -65.48  | 53.61 | 2.22E-01 |
| cg22952828 | -43.33 | 16.80 | 9.91E-03 | -36.74 | 20.68 | 7.57E-02 | -114.60 | 70.25  | 1.03E-01 | -46.18  | 79.69 | 5.62E-01 | -43.93  | 34.41 | 2.02E-01 |
| cg26694616 | 31.30  | 12.14 | 9.91E-03 | 41.22  | 38.41 | 2.83E-01 | -138.59 | 191.68 | 4.70E-01 | 33.76   | 13.39 | 1.17E-02 | 0.14    | 44.37 | 9.98E-01 |
| cg13721644 | 24.84  | 9.63  | 9.92E-03 | 27.27  | 16.90 | 1.07E-01 | 11.44   | 18.06  | 5.26E-01 | 22.01   | 19.33 | 2.55E-01 | 51.06   | 25.55 | 4.56E-02 |
| cg19908362 | -32.87 | 12.75 | 9.92E-03 | -31.71 | 17.97 | 7.76E-02 | -9.77   | 27.65  | 7.24E-01 | -63.44  | 44.05 | 1.50E-01 | -47.55  | 28.49 | 9.51E-02 |
| cg18805457 | 6.29   | 2.44  | 9.92E-03 | 5.81   | 3.67  | 1.13E-01 | 7.66    | 6.43   | 2.33E-01 | 9.76    | 4.61  | 3.41E-02 | -0.86   | 6.65  | 8.97E-01 |
| cg19244655 | 10.96  | 4.25  | 9.92E-03 | 5.66   | 6.45  | 3.81E-01 | 25.87   | 13.80  | 6.09E-02 | 11.73   | 8.38  | 1.61E-01 | 14.19   | 9.20  | 1.23E-01 |
| cg17187764 | -11.23 | 4.35  | 9.92E-03 | -15.95 | 10.22 | 1.19E-01 | -2.78   | 9.66   | 7.73E-01 | -12.62  | 5.68  | 2.64E-02 | -12.54  | 25.60 | 6.24E-01 |
| cg08132815 | 5.43   | 2.11  | 9.93E-03 | 4.61   | 2.76  | 9.48E-02 | 8.98    | 4.70   | 5.59E-02 | 2.62    | 5.59  | 6.39E-01 | 7.65    | 7.75  | 3.23E-01 |
| cg00522588 | 38.56  | 14.96 | 9.93E-03 | 61.89  | 25.98 | 1.72E-02 | 81.08   | 35.74  | 2.33E-02 | 18.99   | 10.25 | 6.38E-02 | 30.06   | 36.98 | 4.16E-01 |
| cg00461578 | -12.03 | 4.67  | 9.93E-03 | -12.57 | 12.47 | 3.13E-01 | 17.97   | 20.63  | 3.84E-01 | -13.73  | 5.45  | 1.17E-02 | -14.82  | 17.00 | 3.83E-01 |
| cg15906260 | -11.41 | 4.43  | 9.93E-03 | -20.90 | 7.40  | 4.71E-03 | -1.80   | 10.78  | 8.67E-01 | -6.86   | 9.17  | 4.55E-01 | -8.42   | 9.03  | 3.51E-01 |
| cg13501225 | -25.56 | 9.92  | 9.93E-03 | -30.47 | 11.77 | 9.60E-03 | -0.58   | 45.69  | 9.90E-01 | -56.31  | 36.53 | 1.23E-01 | 1.53    | 24.13 | 9.50E-01 |
| cg26307701 | -9.68  | 3.76  | 9.93E-03 | -18.08 | 10.28 | 7.86E-02 | -3.26   | 12.36  | 7.92E-01 | -8.21   | 4.50  | 6.85E-02 | -15.95  | 13.34 | 2.32E-01 |
| cg15904664 | 10.48  | 4.07  | 9.94E-03 | 6.82   | 5.85  | 2.43E-01 | 8.99    | 9.01   | 3.18E-01 | 28.08   | 12.15 | 2.09E-02 | 11.01   | 9.08  | 2.25E-01 |
| cg00972246 | 19.65  | 7.62  | 9.94E-03 | 17.76  | 12.15 | 1.44E-01 | 25.52   | 15.69  | 1.04E-01 | 20.32   | 17.34 | 2.41E-01 | 15.27   | 18.11 | 3.99E-01 |
| cg27180153 | 15.19  | 5.90  | 9.95E-03 | 12.95  | 8.34  | 1.20E-01 | -4.53   | 14.35  | 7.52E-01 | 23.04   | 14.48 | 1.11E-01 | 26.35   | 11.10 | 1.75E-02 |
| cg18581663 | -10.56 | 4.10  | 9.95E-03 | -22.86 | 10.33 | 2.69E-02 | -2.97   | 17.65  | 8.66E-01 | -7.79   | 4.95  | 1.15E-01 | -14.22  | 12.80 | 2.67E-01 |
| cg17832364 | -17.01 | 6.60  | 9.95E-03 | -31.40 | 18.80 | 9.50E-02 | 2.04    | 30.33  | 9.46E-01 | -17.87  | 7.48  | 1.68E-02 | 13.85   | 29.53 | 6.39E-01 |
| cg15992399 | 22.56  | 8.75  | 9.96E-03 | 41.26  | 21.62 | 5.63E-02 | 21.58   | 29.16  | 4.59E-01 | 20.86   | 10.75 | 5.24E-02 | 0.26    | 30.42 | 9.93E-01 |
| cg20504025 | 29.07  | 11.28 | 9.96E-03 | 55.70  | 31.94 | 8.12E-02 | 155.80  | 114.81 | 1.75E-01 | 28.93   | 11.69 | 1.33E-02 | -5.21   | 31.20 | 8.67E-01 |
| cg20924425 | 22.68  | 8.80  | 9.96E-03 | 28.81  | 19.45 | 1.39E-01 | 49.47   | 25.71  | 5.44E-02 | 13.37   | 11.34 | 2.38E-01 | 38.73   | 31.97 | 2.26E-01 |
| cg00436663 | 32.63  | 12.66 | 9.96E-03 | 27.38  | 15.38 | 7.51E-02 | 28.12   | 41.54  | 4.99E-01 | 81.36   | 62.89 | 1.96E-01 | 43.26   | 29.14 | 1.38E-01 |
| cg20414505 | 21.40  | 8.31  | 9.96E-03 | 29.62  | 18.18 | 1.03E-01 | 56.71   | 24.55  | 2.09E-02 | 12.17   | 8.90  | 1.71E-01 | 24.37   | 27.00 | 3.67E-01 |
| cg24398318 | 25.14  | 9.76  | 9.96E-03 | 42.06  | 29.88 | 1.59E-01 | 21.36   | 116.41 | 8.54E-01 | 26.22   | 10.84 | 1.56E-02 | -9.30   | 35.21 | 7.92E-01 |
| cg26406292 | -11.83 | 4.59  | 9.97E-03 | -17.04 | 6.47  | 8.48E-03 | -12.44  | 11.41  | 2.75E-01 | -13.04  | 13.88 | 3.48E-01 | 0.76    | 9.64  | 9.37E-01 |
| cg13509934 | -18.65 | 7.24  | 9.97E-03 | -29.81 | 13.19 | 2.38E-02 | -2.13   | 22.25  | 9.24E-01 | -8.56   | 12.65 | 4.99E-01 | -24.97  | 14.02 | 7.49E-02 |
| cg03509039 | 41.66  | 16.17 | 9.97E-03 | 34.21  | 26.71 | 2.00E-01 | 49.90   | 52.00  | 3.37E-01 | 43.39   | 24.10 | 7.17E-02 | 54.86   | 54.82 | 3.17E-01 |
| cg14009440 | 14.86  | 5.77  | 9.98E-03 | 15.94  | 8.40  | 5.77E-02 | 23.73   | 12.43  | 5.63E-02 | 16.16   | 16.16 | 3.17E-01 | 0.94    | 13.40 | 9.44E-01 |
| cg02986801 | 22.87  | 8.88  | 9.98E-03 | 33.96  | 14.78 | 2.16E-02 | 19.35   | 15.88  | 2.23E-01 | 32.70   | 22.70 | 1.50E-01 | -2.37   | 21.26 | 9.11E-01 |
| cg23188121 | -44.09 | 17.11 | 9.99E-03 | -34.85 | 52.16 | 5.04E-01 | -123.47 | 166.47 | 4.58E-01 | -37.45  | 19.23 | 5.15E-02 | -104.79 | 57.27 | 6.73E-02 |
| cg00891025 | 20.79  | 8.07  | 9.99E-03 | 24.37  | 13.06 | 6.20E-02 | 17.80   | 14.11  | 2.07E-01 | 6.86    | 19.38 | 7.23E-01 | 37.93   | 23.50 | 1.07E-01 |
| cg24928053 | -20.12 | 7.81  | 9.99E-03 | -37.68 | 15.05 | 1.23E-02 | -16.75  | 16.88  | 3.21E-01 | -20.63  | 9.95  | 3.81E-02 | 11.49   | 22.08 | 6.03E-01 |
| cg21379004 | 21.49  | 8.34  | 9.99E-03 | 24.66  | 16.97 | 1.46E-01 | 11.70   | 55.36  | 8.33E-01 | 15.71   | 10.50 | 1.35E-01 | 51.14   | 25.77 | 4.73E-02 |
| cg18952026 | 23.23  | 9.02  | 9.99E-03 | 25.30  | 13.17 | 5.47E-02 | 46.71   | 24.73  | 5.89E-02 | 10.85   | 26.44 | 6.82E-01 | 13.81   | 16.98 | 4.16E-01 |

|            |        |       |          |        |       |          |         |        |          |        |       |          |        |       |          |
|------------|--------|-------|----------|--------|-------|----------|---------|--------|----------|--------|-------|----------|--------|-------|----------|
| cg01586116 | 11.52  | 4.47  | 9.99E-03 | 16.70  | 7.15  | 1.95E-02 | 12.99   | 10.66  | 2.23E-01 | 20.27  | 21.54 | 3.47E-01 | 4.69   | 7.16  | 5.13E-01 |
| cg01081303 | -11.00 | 4.27  | 9.99E-03 | -9.83  | 11.56 | 3.95E-01 | -22.10  | 25.02  | 3.77E-01 | -12.51 | 4.91  | 1.09E-02 | 5.66   | 15.26 | 7.10E-01 |
| cg19690494 | 20.30  | 7.88  | 1.00E-02 | 26.72  | 18.68 | 1.53E-01 | 3.14    | 28.06  | 9.11E-01 | 20.27  | 9.63  | 3.53E-02 | 23.51  | 29.15 | 4.20E-01 |
| cg23396732 | -15.27 | 5.93  | 1.00E-02 | -6.10  | 15.42 | 6.93E-01 | -26.39  | 30.06  | 3.80E-01 | -16.34 | 7.01  | 1.97E-02 | -16.88 | 18.97 | 3.74E-01 |
| cg02414175 | 32.52  | 12.63 | 1.00E-02 | 43.15  | 16.27 | 8.01E-03 | 69.15   | 32.66  | 3.43E-02 | -3.70  | 34.44 | 9.14E-01 | 14.89  | 21.04 | 4.79E-01 |
| cg01012244 | 33.99  | 13.20 | 1.00E-02 | 29.47  | 18.25 | 1.06E-01 | 23.25   | 30.53  | 4.46E-01 | 30.30  | 43.64 | 4.88E-01 | 57.60  | 29.57 | 5.14E-02 |
| cg14898260 | 34.74  | 13.49 | 1.00E-02 | 43.14  | 31.75 | 1.74E-01 | -36.17  | 61.71  | 5.58E-01 | 37.08  | 16.43 | 2.41E-02 | 37.73  | 43.04 | 3.81E-01 |
| cg13649658 | 23.19  | 9.00  | 1.00E-02 | 11.87  | 17.13 | 4.88E-01 | 16.77   | 19.64  | 3.93E-01 | 30.71  | 14.52 | 3.44E-02 | 35.54  | 25.13 | 1.57E-01 |
| cg06401414 | -7.80  | 3.03  | 1.00E-02 | -9.68  | 4.16  | 1.99E-02 | -2.17   | 7.12   | 7.61E-01 | -10.17 | 9.37  | 2.78E-01 | -6.59  | 7.09  | 3.52E-01 |
| cg03453781 | -10.50 | 4.08  | 1.00E-02 | -12.39 | 8.78  | 1.58E-01 | -2.89   | 16.54  | 8.61E-01 | -9.76  | 5.28  | 6.45E-02 | -14.35 | 11.40 | 2.08E-01 |
| cg17722129 | -6.05  | 2.35  | 1.00E-02 | -9.67  | 4.60  | 3.57E-02 | -6.16   | 7.26   | 3.96E-01 | -6.22  | 3.23  | 5.44E-02 | 3.64   | 7.15  | 6.10E-01 |
| cg24001070 | 46.48  | 18.05 | 1.00E-02 | 39.99  | 22.05 | 6.97E-02 | -42.89  | 100.54 | 6.70E-01 | 139.94 | 77.29 | 7.02E-02 | 55.27  | 36.61 | 1.31E-01 |
| cg16112844 | 27.04  | 10.50 | 1.00E-02 | 27.86  | 31.78 | 3.81E-01 | 17.04   | 139.38 | 9.03E-01 | 28.91  | 11.65 | 1.31E-02 | 5.89   | 38.86 | 8.80E-01 |
| cg08746138 | -46.18 | 17.93 | 1.00E-02 | -30.99 | 23.38 | 1.85E-01 | -106.56 | 50.15  | 3.36E-02 | -77.90 | 66.54 | 2.42E-01 | -41.04 | 39.03 | 2.93E-01 |
| cg10978355 | 10.68  | 4.15  | 1.00E-02 | 12.58  | 5.86  | 3.17E-02 | 14.63   | 9.29   | 1.15E-01 | 4.35   | 11.59 | 7.07E-01 | 5.23   | 10.03 | 6.02E-01 |
| cg02116856 | -13.94 | 5.42  | 1.00E-02 | -20.50 | 12.33 | 9.63E-02 | -19.94  | 22.06  | 3.66E-01 | -8.49  | 7.19  | 2.38E-01 | -22.05 | 12.76 | 8.39E-02 |
| cg11306628 | -26.11 | 10.14 | 1.00E-02 | -28.52 | 14.84 | 5.45E-02 | -31.43  | 31.97  | 3.26E-01 | -10.91 | 30.69 | 7.22E-01 | -26.11 | 17.86 | 1.44E-01 |
| cg05544807 | 14.40  | 5.59  | 1.00E-02 | 22.65  | 8.22  | 5.87E-03 | 9.20    | 11.35  | 4.17E-01 | 13.09  | 18.38 | 4.76E-01 | 2.34   | 12.44 | 8.51E-01 |
| cg24182329 | -22.23 | 8.64  | 1.00E-02 | -30.76 | 15.91 | 5.31E-02 | -14.54  | 21.36  | 4.96E-01 | -17.25 | 13.69 | 2.08E-01 | -27.34 | 22.81 | 2.31E-01 |
| cg14173185 | 41.14  | 15.98 | 1.00E-02 | 32.60  | 20.59 | 1.13E-01 | 68.19   | 50.74  | 1.79E-01 | -6.02  | 55.46 | 9.14E-01 | 70.77  | 34.44 | 3.99E-02 |
| cg05090972 | 47.52  | 18.46 | 1.01E-02 | 46.81  | 22.07 | 3.39E-02 | 60.78   | 81.92  | 4.58E-01 | -21.64 | 82.50 | 7.93E-01 | 64.04  | 41.39 | 1.22E-01 |
| cg27256309 | 22.96  | 8.92  | 1.01E-02 | 36.65  | 17.12 | 3.23E-02 | 0.91    | 18.09  | 9.60E-01 | 31.01  | 15.25 | 4.20E-02 | 15.21  | 23.55 | 5.18E-01 |
| cg21528927 | 9.06   | 3.52  | 1.01E-02 | 6.74   | 5.60  | 2.29E-01 | 1.97    | 8.05   | 8.07E-01 | 12.24  | 6.36  | 5.44E-02 | 21.10  | 10.72 | 4.90E-02 |
| cg00014333 | -11.59 | 4.50  | 1.01E-02 | -20.32 | 7.59  | 7.39E-03 | -2.40   | 10.04  | 8.11E-01 | -11.95 | 11.32 | 2.91E-01 | -7.13  | 8.39  | 3.95E-01 |
| cg05057352 | 13.26  | 5.15  | 1.01E-02 | 9.65   | 11.66 | 4.08E-01 | -0.20   | 15.00  | 9.89E-01 | 19.46  | 6.27  | 1.93E-03 | -6.98  | 18.42 | 7.05E-01 |
| cg03944501 | -21.59 | 8.39  | 1.01E-02 | -41.90 | 25.04 | 9.43E-02 | -23.32  | 45.15  | 6.06E-01 | -21.75 | 9.44  | 2.13E-02 | 17.17  | 33.29 | 6.06E-01 |
| cg02703843 | 42.97  | 16.70 | 1.01E-02 | 67.04  | 23.38 | 4.13E-03 | 9.17    | 63.70  | 8.86E-01 | 17.95  | 58.69 | 7.60E-01 | 19.63  | 28.65 | 4.93E-01 |
| cg09007620 | 20.72  | 8.05  | 1.01E-02 | 13.74  | 10.19 | 1.77E-01 | 24.74   | 24.87  | 3.20E-01 | 17.41  | 53.95 | 7.47E-01 | 36.84  | 16.15 | 2.25E-02 |
| cg09006749 | 32.67  | 12.70 | 1.01E-02 | 36.95  | 17.76 | 3.75E-02 | -29.79  | 43.38  | 4.92E-01 | 21.64  | 33.76 | 5.21E-01 | 50.70  | 24.81 | 4.10E-02 |
| cg01217601 | -11.81 | 4.59  | 1.01E-02 | -18.02 | 8.28  | 2.94E-02 | -5.76   | 11.99  | 6.31E-01 | -11.27 | 6.91  | 1.03E-01 | -4.25  | 14.25 | 7.66E-01 |
| cg26840272 | -28.02 | 10.89 | 1.01E-02 | -44.37 | 23.54 | 5.94E-02 | 38.49   | 50.69  | 4.48E-01 | -30.59 | 13.73 | 2.58E-02 | -9.42  | 32.82 | 7.74E-01 |
| cg10452522 | -24.45 | 9.50  | 1.01E-02 | -32.58 | 11.45 | 4.45E-03 | -1.40   | 29.68  | 9.62E-01 | -64.31 | 55.38 | 2.46E-01 | 0.10   | 22.42 | 9.97E-01 |
| cg22702833 | 49.51  | 19.24 | 1.01E-02 | 56.27  | 27.32 | 3.94E-02 | 77.77   | 87.99  | 3.77E-01 | 22.96  | 53.06 | 6.65E-01 | 45.76  | 33.78 | 1.76E-01 |
| cg20806172 | -20.64 | 8.02  | 1.01E-02 | -26.53 | 12.73 | 3.72E-02 | -7.34   | 20.87  | 7.25E-01 | -6.06  | 18.07 | 7.37E-01 | -30.32 | 15.79 | 5.49E-02 |
| cg26515805 | 22.16  | 8.62  | 1.01E-02 | 26.39  | 13.68 | 5.36E-02 | -5.67   | 37.20  | 8.79E-01 | 25.82  | 27.10 | 3.41E-01 | 20.91  | 12.86 | 1.04E-01 |



|            |        |       |          |        |       |          |         |        |          |        |       |          |        |       |          |
|------------|--------|-------|----------|--------|-------|----------|---------|--------|----------|--------|-------|----------|--------|-------|----------|
| cg18202741 | -12.73 | 4.95  | 1.01E-02 | -16.92 | 7.63  | 2.65E-02 | -9.81   | 11.84  | 4.08E-01 | -14.61 | 11.13 | 1.89E-01 | -4.83  | 10.90 | 6.58E-01 |
| cg08171937 | -51.97 | 20.21 | 1.01E-02 | -58.47 | 24.58 | 1.74E-02 | -20.42  | 80.74  | 8.00E-01 | -83.19 | 80.93 | 3.04E-01 | -30.05 | 45.30 | 5.07E-01 |
| cg25565850 | 17.83  | 6.94  | 1.01E-02 | 15.27  | 8.38  | 6.86E-02 | 17.81   | 22.28  | 4.24E-01 | 37.76  | 28.08 | 1.79E-01 | 21.26  | 17.46 | 2.23E-01 |
| cg03872584 | -9.80  | 3.81  | 1.01E-02 | -15.01 | 6.16  | 1.48E-02 | -10.01  | 8.44   | 2.36E-01 | 0.90   | 9.13  | 9.22E-01 | -9.08  | 7.79  | 2.44E-01 |
| cg23870903 | 10.07  | 3.92  | 1.01E-02 | 12.19  | 10.18 | 2.31E-01 | 19.85   | 15.87  | 2.11E-01 | 10.39  | 4.59  | 2.35E-02 | -8.12  | 15.60 | 6.03E-01 |
| cg16994041 | 5.45   | 2.12  | 1.01E-02 | 5.51   | 3.32  | 9.67E-02 | 8.04    | 5.81   | 1.66E-01 | 4.79   | 4.05  | 2.38E-01 | 4.44   | 4.94  | 3.68E-01 |
| cg07377341 | 17.18  | 6.68  | 1.01E-02 | 19.86  | 12.99 | 1.26E-01 | 15.53   | 52.51  | 7.67E-01 | 16.66  | 8.40  | 4.71E-02 | 13.02  | 22.75 | 5.67E-01 |
| cg24408436 | -11.29 | 4.39  | 1.01E-02 | -13.62 | 5.97  | 2.24E-02 | 3.03    | 10.92  | 7.81E-01 | -9.05  | 14.46 | 5.31E-01 | -17.52 | 9.74  | 7.21E-02 |
| cg04618277 | -19.72 | 7.67  | 1.01E-02 | -9.05  | 14.66 | 5.37E-01 | -10.93  | 20.07  | 5.86E-01 | -34.79 | 12.16 | 4.23E-03 | -9.92  | 17.96 | 5.81E-01 |
| cg04724556 | -24.84 | 9.66  | 1.01E-02 | -19.66 | 19.13 | 3.04E-01 | 21.79   | 46.69  | 6.41E-01 | -34.76 | 12.73 | 6.32E-03 | -5.85  | 27.21 | 8.30E-01 |
| cg26693681 | -8.10  | 3.15  | 1.01E-02 | -3.36  | 5.53  | 5.43E-01 | -4.05   | 6.83   | 5.53E-01 | -15.20 | 4.89  | 1.87E-03 | -5.57  | 7.79  | 4.75E-01 |
| cg08712631 | 13.57  | 5.28  | 1.02E-02 | 17.80  | 13.33 | 1.82E-01 | 34.47   | 18.43  | 6.14E-02 | 11.66  | 6.42  | 6.96E-02 | 0.79   | 18.15 | 9.65E-01 |
| cg04184278 | 17.06  | 6.64  | 1.02E-02 | 25.21  | 15.23 | 9.80E-02 | 10.16   | 25.07  | 6.85E-01 | 15.46  | 8.16  | 5.83E-02 | 16.95  | 23.57 | 4.72E-01 |
| cg12162353 | 8.41   | 3.27  | 1.02E-02 | 9.97   | 4.49  | 2.65E-02 | 3.70    | 6.09   | 5.43E-01 | -1.22  | 12.51 | 9.22E-01 | 19.03  | 9.77  | 5.14E-02 |
| cg27468773 | 13.11  | 5.10  | 1.02E-02 | 5.83   | 8.24  | 4.79E-01 | 22.89   | 8.35   | 6.10E-03 | 13.89  | 35.97 | 7.00E-01 | 9.14   | 10.80 | 3.97E-01 |
| cg10840007 | 32.18  | 12.52 | 1.02E-02 | 28.43  | 27.17 | 2.95E-01 | -2.74   | 40.22  | 9.46E-01 | 37.71  | 16.16 | 1.96E-02 | 41.71  | 41.76 | 3.18E-01 |
| cg16423505 | 23.42  | 9.11  | 1.02E-02 | 58.44  | 42.28 | 1.67E-01 | -117.41 | 144.66 | 4.17E-01 | 24.33  | 9.66  | 1.18E-02 | -8.28  | 37.43 | 8.25E-01 |
| cg00476955 | 11.55  | 4.49  | 1.02E-02 | 15.28  | 6.66  | 2.17E-02 | 12.27   | 11.00  | 2.64E-01 | 17.74  | 10.58 | 9.38E-02 | -3.38  | 10.13 | 7.38E-01 |
| cg14434062 | 12.84  | 5.00  | 1.02E-02 | 19.24  | 7.69  | 1.23E-02 | 15.69   | 12.39  | 2.05E-01 | 10.69  | 10.85 | 3.24E-01 | -0.54  | 11.09 | 9.61E-01 |
| cg23174201 | -15.99 | 6.22  | 1.02E-02 | -21.64 | 10.46 | 3.86E-02 | -10.58  | 14.58  | 4.68E-01 | -0.80  | 14.64 | 9.56E-01 | -22.09 | 11.69 | 5.89E-02 |
| cg02577046 | 23.60  | 9.19  | 1.02E-02 | 42.02  | 20.12 | 3.68E-02 | 55.09   | 46.70  | 2.38E-01 | 21.35  | 11.57 | 6.49E-02 | -6.23  | 26.30 | 8.13E-01 |
| cg02618355 | -28.23 | 10.99 | 1.02E-02 | -24.59 | 19.39 | 2.05E-01 | -59.10  | 42.45  | 1.64E-01 | -31.55 | 17.02 | 6.39E-02 | -16.51 | 24.91 | 5.08E-01 |
| cg23413506 | 12.23  | 4.76  | 1.02E-02 | 8.38   | 5.53  | 1.30E-01 | 4.60    | 8.72   | 5.98E-01 | 32.49  | 12.46 | 9.10E-03 | 15.69  | 8.77  | 7.37E-02 |
| cg26654358 | -28.98 | 11.28 | 1.02E-02 | -39.73 | 15.35 | 9.67E-03 | -9.63   | 35.54  | 7.86E-01 | -46.44 | 32.81 | 1.57E-01 | -4.40  | 22.99 | 8.48E-01 |
| cg10297426 | 16.84  | 6.56  | 1.02E-02 | 29.08  | 12.79 | 2.30E-02 | 5.17    | 18.37  | 7.78E-01 | 14.06  | 9.30  | 1.30E-01 | 13.73  | 19.57 | 4.83E-01 |
| cg11681959 | 35.78  | 13.93 | 1.02E-02 | 52.38  | 18.67 | 5.02E-03 | 43.03   | 37.52  | 2.51E-01 | 10.90  | 55.85 | 8.45E-01 | 0.00   | 28.26 | 1.00E+00 |
| cg18750049 | 31.62  | 12.31 | 1.02E-02 | 31.13  | 16.83 | 6.44E-02 | 32.96   | 48.30  | 4.95E-01 | -11.04 | 65.87 | 8.67E-01 | 36.18  | 20.38 | 7.59E-02 |
| cg12949616 | 31.97  | 12.45 | 1.02E-02 | 33.33  | 17.05 | 5.07E-02 | 51.71   | 35.73  | 1.48E-01 | 16.15  | 32.99 | 6.24E-01 | 27.70  | 27.62 | 3.16E-01 |
| cg26457809 | 7.39   | 2.88  | 1.02E-02 | 4.37   | 4.30  | 3.10E-01 | 11.22   | 6.94   | 1.06E-01 | 14.06  | 7.75  | 6.97E-02 | 6.46   | 5.84  | 2.69E-01 |
| cg02213045 | -13.00 | 5.06  | 1.02E-02 | -21.16 | 15.02 | 1.59E-01 | -5.31   | 33.49  | 8.74E-01 | -12.56 | 5.68  | 2.70E-02 | -7.15  | 19.28 | 7.11E-01 |
| cg21596313 | -45.67 | 17.79 | 1.02E-02 | -54.99 | 24.41 | 2.43E-02 | -37.87  | 40.66  | 3.52E-01 | 13.19  | 63.35 | 8.35E-01 | -51.64 | 39.90 | 1.96E-01 |
| cg06594404 | 12.37  | 4.82  | 1.02E-02 | 19.62  | 7.91  | 1.32E-02 | 8.24    | 10.82  | 4.46E-01 | 12.34  | 10.70 | 2.49E-01 | 4.20   | 10.08 | 6.77E-01 |
| cg24728698 | -7.77  | 3.02  | 1.02E-02 | -11.16 | 5.35  | 3.72E-02 | -2.87   | 8.18   | 7.26E-01 | -6.68  | 4.73  | 1.58E-01 | -7.97  | 8.19  | 3.31E-01 |
| cg25622036 | 26.76  | 10.42 | 1.03E-02 | 19.10  | 14.64 | 1.92E-01 | 56.18   | 34.10  | 9.94E-02 | 88.47  | 47.46 | 6.23E-02 | 21.51  | 17.58 | 2.21E-01 |
| cg08922201 | -14.06 | 5.48  | 1.03E-02 | -8.91  | 7.70  | 2.48E-01 | -16.32  | 13.98  | 2.43E-01 | -39.16 | 17.88 | 2.85E-02 | -13.67 | 11.02 | 2.15E-01 |

|            |        |       |          |        |       |          |         |        |          |        |       |          |        |       |          |
|------------|--------|-------|----------|--------|-------|----------|---------|--------|----------|--------|-------|----------|--------|-------|----------|
| cg12946514 | 23.88  | 9.30  | 1.03E-02 | 30.95  | 12.31 | 1.20E-02 | 8.34    | 29.07  | 7.74E-01 | -37.80 | 42.82 | 3.77E-01 | 25.55  | 17.59 | 1.46E-01 |
| cg10187879 | 22.15  | 8.63  | 1.03E-02 | 23.43  | 12.62 | 6.34E-02 | 35.03   | 27.24  | 1.98E-01 | 9.12   | 29.62 | 7.58E-01 | 19.90  | 14.65 | 1.74E-01 |
| cg12409874 | 21.02  | 8.19  | 1.03E-02 | 28.12  | 14.04 | 4.51E-02 | 3.92    | 35.78  | 9.13E-01 | 18.83  | 11.55 | 1.03E-01 | 16.99  | 25.37 | 5.03E-01 |
| cg27408184 | -18.31 | 7.13  | 1.03E-02 | -25.91 | 11.97 | 3.05E-02 | -16.49  | 15.33  | 2.82E-01 | -14.76 | 17.59 | 4.02E-01 | -11.80 | 13.88 | 3.95E-01 |
| cg00151914 | 18.22  | 7.10  | 1.03E-02 | 29.17  | 12.17 | 1.65E-02 | 16.91   | 21.54  | 4.32E-01 | 15.64  | 20.07 | 4.36E-01 | 10.57  | 10.88 | 3.31E-01 |
| cg25649641 | 15.27  | 5.95  | 1.03E-02 | 30.92  | 13.18 | 1.90E-02 | 4.80    | 20.98  | 8.19E-01 | 11.25  | 10.56 | 2.87E-01 | 12.58  | 9.41  | 1.81E-01 |
| cg24059623 | -10.31 | 4.02  | 1.03E-02 | -18.87 | 7.79  | 1.54E-02 | -4.19   | 9.87   | 6.71E-01 | -4.49  | 5.66  | 4.28E-01 | -17.67 | 9.07  | 5.13E-02 |
| cg26361892 | 35.06  | 13.66 | 1.03E-02 | -19.42 | 42.21 | 6.45E-01 | 20.61   | 171.27 | 9.04E-01 | 42.70  | 15.27 | 5.18E-03 | 31.53  | 45.70 | 4.90E-01 |
| cg11079989 | 33.97  | 13.24 | 1.03E-02 | 25.65  | 15.23 | 9.22E-02 | 149.16  | 100.43 | 1.38E-01 | 93.82  | 66.34 | 1.57E-01 | 44.15  | 30.57 | 1.49E-01 |
| cg09186979 | 19.98  | 7.79  | 1.03E-02 | 34.94  | 23.02 | 1.29E-01 | 5.90    | 29.64  | 8.42E-01 | 17.75  | 8.97  | 4.77E-02 | 35.14  | 31.16 | 2.59E-01 |
| cg08708790 | -14.63 | 5.70  | 1.03E-02 | -19.74 | 9.15  | 3.09E-02 | -19.09  | 13.82  | 1.67E-01 | -6.36  | 11.95 | 5.94E-01 | -10.61 | 12.33 | 3.90E-01 |
| cg18480946 | -11.05 | 4.30  | 1.03E-02 | -14.61 | 7.60  | 5.45E-02 | -2.58   | 13.69  | 8.51E-01 | -9.54  | 6.36  | 1.34E-01 | -14.20 | 12.30 | 2.48E-01 |
| cg23564243 | 12.61  | 4.91  | 1.03E-02 | 19.72  | 7.38  | 7.58E-03 | 14.45   | 13.22  | 2.74E-01 | 3.28   | 9.87  | 7.39E-01 | 6.24   | 11.89 | 6.00E-01 |
| cg00406796 | -28.42 | 11.07 | 1.03E-02 | -17.90 | 31.18 | 5.66E-01 | -22.50  | 112.45 | 8.41E-01 | -30.61 | 12.30 | 1.28E-02 | -21.07 | 47.90 | 6.60E-01 |
| cg26386846 | 27.95  | 10.89 | 1.03E-02 | 49.87  | 30.24 | 9.91E-02 | 8.53    | 144.86 | 9.53E-01 | 23.01  | 12.11 | 5.74E-02 | 50.64  | 46.16 | 2.73E-01 |
| cg02798066 | 36.72  | 14.31 | 1.03E-02 | 29.95  | 43.33 | 4.90E-01 | -119.71 | 120.21 | 3.19E-01 | 43.54  | 16.14 | 6.97E-03 | 10.10  | 47.62 | 8.32E-01 |
| cg03224364 | 41.77  | 16.28 | 1.03E-02 | 49.96  | 48.07 | 2.99E-01 | 57.19   | 208.27 | 7.84E-01 | 45.05  | 18.02 | 1.24E-02 | -17.27 | 64.95 | 7.90E-01 |
| cg10025432 | -16.53 | 6.44  | 1.03E-02 | -21.58 | 10.54 | 4.06E-02 | -18.24  | 14.42  | 2.06E-01 | -3.18  | 14.17 | 8.23E-01 | -18.97 | 13.74 | 1.68E-01 |
| cg14767442 | 19.52  | 7.61  | 1.03E-02 | 24.01  | 14.45 | 9.67E-02 | 5.01    | 25.74  | 8.46E-01 | 18.20  | 11.84 | 1.24E-01 | 22.05  | 16.10 | 1.71E-01 |
| cg14950321 | -10.98 | 4.28  | 1.03E-02 | -8.47  | 5.90  | 1.51E-01 | -12.06  | 10.46  | 2.49E-01 | -22.41 | 12.45 | 7.18E-02 | -9.86  | 9.86  | 3.18E-01 |
| cg01684429 | 22.85  | 8.91  | 1.03E-02 | 40.07  | 18.44 | 2.98E-02 | 5.38    | 28.80  | 8.52E-01 | 22.04  | 12.11 | 6.88E-02 | 8.23   | 24.68 | 7.39E-01 |
| cg13989999 | -10.96 | 4.27  | 1.03E-02 | -11.18 | 5.81  | 5.43E-02 | -16.23  | 9.74   | 9.56E-02 | -3.47  | 12.28 | 7.78E-01 | -9.38  | 11.17 | 4.01E-01 |
| cg19308436 | -14.96 | 5.83  | 1.03E-02 | -3.99  | 16.87 | 8.13E-01 | 11.65   | 32.23  | 7.18E-01 | -18.06 | 6.57  | 6.00E-03 | -10.65 | 23.69 | 6.53E-01 |
| cg03143365 | -13.32 | 5.19  | 1.03E-02 | -16.58 | 7.08  | 1.92E-02 | -7.13   | 12.20  | 5.59E-01 | 13.15  | 33.16 | 6.92E-01 | -13.36 | 10.24 | 1.92E-01 |
| cg03571604 | 27.53  | 10.73 | 1.03E-02 | 52.93  | 19.76 | 7.41E-03 | -8.58   | 80.92  | 9.16E-01 | 19.93  | 13.96 | 1.54E-01 | 3.15   | 34.47 | 9.27E-01 |
| cg04275506 | -9.10  | 3.55  | 1.03E-02 | -4.45  | 6.81  | 5.14E-01 | -9.80   | 9.85   | 3.20E-01 | -11.55 | 5.64  | 4.07E-02 | -10.11 | 7.87  | 1.99E-01 |
| cg09745087 | 39.63  | 15.45 | 1.03E-02 | 37.79  | 22.00 | 8.59E-02 | 97.04   | 63.87  | 1.29E-01 | 4.55   | 45.23 | 9.20E-01 | 44.59  | 26.83 | 9.65E-02 |
| cg19718450 | -6.54  | 2.55  | 1.03E-02 | -9.41  | 3.77  | 1.24E-02 | -4.09   | 5.27   | 4.38E-01 | 2.11   | 10.48 | 8.40E-01 | -5.61  | 5.12  | 2.73E-01 |
| cg24966702 | 18.87  | 7.36  | 1.03E-02 | 40.02  | 20.44 | 5.03E-02 | 9.08    | 25.59  | 7.23E-01 | 13.61  | 8.96  | 1.29E-01 | 33.14  | 21.83 | 1.29E-01 |
| cg14281092 | -23.26 | 9.07  | 1.03E-02 | -13.82 | 25.22 | 5.84E-01 | -28.87  | 37.90  | 4.46E-01 | -28.37 | 10.56 | 7.20E-03 | 14.82  | 33.03 | 6.54E-01 |
| cg12386808 | -11.62 | 4.53  | 1.03E-02 | -22.79 | 14.50 | 1.16E-01 | -28.73  | 29.30  | 3.27E-01 | -10.01 | 5.11  | 5.00E-02 | -9.12  | 15.02 | 5.44E-01 |
| cg16786808 | 5.38   | 2.10  | 1.03E-02 | 2.88   | 3.15  | 3.62E-01 | 9.44    | 3.63   | 9.30E-03 | 2.03   | 8.79  | 8.18E-01 | 5.02   | 5.12  | 3.27E-01 |
| cg04479713 | 11.39  | 4.44  | 1.03E-02 | 13.40  | 6.78  | 4.80E-02 | 8.48    | 8.24   | 3.03E-01 | 11.57  | 13.60 | 3.95E-01 | 11.18  | 10.67 | 2.95E-01 |
| cg20007894 | -9.39  | 3.66  | 1.03E-02 | -12.57 | 8.03  | 1.17E-01 | -0.86   | 12.83  | 9.46E-01 | -8.77  | 4.71  | 6.27E-02 | -13.24 | 11.23 | 2.38E-01 |
| cg25949513 | 29.86  | 11.64 | 1.03E-02 | 71.73  | 31.16 | 2.13E-02 | 47.22   | 150.49 | 7.54E-01 | 19.03  | 9.98  | 5.64E-02 | 51.90  | 32.68 | 1.12E-01 |

|            |        |       |          |        |       |          |         |        |          |        |       |          |        |       |          |
|------------|--------|-------|----------|--------|-------|----------|---------|--------|----------|--------|-------|----------|--------|-------|----------|
| cg08584627 | 30.87  | 12.04 | 1.03E-02 | 20.79  | 17.69 | 2.40E-01 | 33.71   | 29.45  | 2.52E-01 | 46.79  | 34.16 | 1.71E-01 | 39.87  | 24.28 | 1.01E-01 |
| cg21852721 | -49.97 | 19.49 | 1.03E-02 | -47.84 | 26.06 | 6.64E-02 | -56.41  | 60.86  | 3.54E-01 | -69.63 | 53.74 | 1.95E-01 | -40.04 | 42.84 | 3.50E-01 |
| cg25297790 | -11.53 | 4.50  | 1.03E-02 | -4.30  | 11.95 | 7.19E-01 | 9.11    | 25.47  | 7.20E-01 | -14.94 | 5.23  | 4.26E-03 | -1.72  | 15.21 | 9.10E-01 |
| cg11031737 | -16.42 | 6.40  | 1.03E-02 | -24.40 | 12.78 | 5.62E-02 | -0.11   | 17.56  | 9.95E-01 | -15.85 | 9.04  | 7.97E-02 | -20.31 | 18.89 | 2.82E-01 |
| cg13840239 | -11.28 | 4.40  | 1.03E-02 | -26.72 | 10.33 | 9.73E-03 | -5.12   | 13.52  | 7.05E-01 | -7.57  | 5.79  | 1.91E-01 | -11.27 | 11.99 | 3.47E-01 |
| cg15957004 | 31.63  | 12.33 | 1.03E-02 | 43.98  | 16.64 | 8.21E-03 | 33.37   | 22.45  | 1.37E-01 | -41.57 | 43.50 | 3.39E-01 | 30.89  | 24.63 | 2.10E-01 |
| cg07159958 | 11.73  | 4.57  | 1.03E-02 | 9.02   | 7.82  | 2.49E-01 | 14.38   | 10.67  | 1.78E-01 | 14.22  | 9.54  | 1.36E-01 | 11.19  | 9.26  | 2.27E-01 |
| cg24647031 | 14.98  | 5.84  | 1.03E-02 | 36.13  | 15.96 | 2.36E-02 | 22.61   | 34.82  | 5.16E-01 | 12.52  | 6.76  | 6.39E-02 | 1.57   | 19.47 | 9.36E-01 |
| cg02453013 | 5.95   | 2.32  | 1.04E-02 | 4.13   | 2.91  | 1.55E-01 | 9.86    | 4.18   | 1.85E-02 | -0.97  | 6.02  | 8.72E-01 | 11.63  | 6.03  | 5.36E-02 |
| cg17055274 | -43.21 | 16.85 | 1.04E-02 | -52.92 | 25.54 | 3.83E-02 | -58.15  | 49.00  | 2.35E-01 | -3.69  | 29.11 | 8.99E-01 | -85.35 | 41.19 | 3.82E-02 |
| cg25515997 | 19.36  | 7.55  | 1.04E-02 | 4.56   | 18.99 | 8.10E-01 | -16.88  | 39.60  | 6.70E-01 | 25.82  | 8.95  | 3.91E-03 | 9.25   | 24.78 | 7.09E-01 |
| cg25284089 | 19.67  | 7.67  | 1.04E-02 | 19.81  | 16.90 | 2.41E-01 | 19.93   | 15.98  | 2.12E-01 | 20.03  | 11.16 | 7.27E-02 | 16.85  | 25.60 | 5.11E-01 |
| cg12926529 | 16.13  | 6.29  | 1.04E-02 | 10.96  | 16.86 | 5.16E-01 | 4.73    | 20.80  | 8.20E-01 | 17.53  | 7.49  | 1.92E-02 | 28.62  | 25.19 | 2.56E-01 |
| cg27494470 | -12.12 | 4.73  | 1.04E-02 | -10.96 | 8.01  | 1.71E-01 | -8.23   | 11.56  | 4.76E-01 | -16.14 | 8.91  | 7.00E-02 | -11.75 | 10.53 | 2.64E-01 |
| cg02498422 | 25.94  | 10.12 | 1.04E-02 | 38.15  | 20.33 | 6.05E-02 | -4.23   | 20.00  | 8.32E-01 | 33.07  | 15.32 | 3.09E-02 | 41.58  | 31.40 | 1.86E-01 |
| cg08089041 | -24.62 | 9.60  | 1.04E-02 | -19.66 | 13.54 | 1.46E-01 | -33.22  | 32.48  | 3.06E-01 | -37.58 | 31.87 | 2.38E-01 | -26.39 | 17.02 | 1.21E-01 |
| cg03964111 | -6.23  | 2.43  | 1.04E-02 | -3.64  | 3.27  | 2.65E-01 | -11.32  | 6.11   | 6.41E-02 | -13.27 | 8.90  | 1.36E-01 | -6.69  | 5.24  | 2.02E-01 |
| cg19758881 | -12.92 | 5.04  | 1.04E-02 | -7.06  | 7.18  | 3.25E-01 | -17.13  | 12.33  | 1.65E-01 | -19.02 | 16.80 | 2.58E-01 | -19.46 | 10.08 | 5.35E-02 |
| cg10105681 | 11.28  | 4.40  | 1.04E-02 | 3.99   | 9.47  | 6.73E-01 | 18.09   | 13.26  | 1.72E-01 | 18.49  | 7.17  | 9.88E-03 | 4.89   | 8.07  | 5.44E-01 |
| cg01534145 | 25.93  | 10.12 | 1.04E-02 | 17.80  | 14.18 | 2.10E-01 | 27.48   | 28.39  | 3.33E-01 | 72.74  | 37.82 | 5.44E-02 | 27.94  | 18.69 | 1.35E-01 |
| cg03683132 | 14.66  | 5.72  | 1.04E-02 | 0.86   | 13.99 | 9.51E-01 | 4.59    | 24.30  | 8.50E-01 | 16.15  | 6.94  | 2.00E-02 | 33.32  | 18.18 | 6.68E-02 |
| cg18033335 | 23.78  | 9.28  | 1.04E-02 | 3.15   | 18.40 | 8.64E-01 | 31.10   | 17.01  | 6.75E-02 | 25.91  | 17.34 | 1.35E-01 | 39.01  | 23.07 | 9.09E-02 |
| cg12054981 | -5.63  | 2.20  | 1.04E-02 | -7.92  | 3.23  | 1.43E-02 | -1.54   | 4.26   | 7.17E-01 | -4.48  | 6.80  | 5.10E-01 | -6.50  | 5.35  | 2.24E-01 |
| cg24115221 | 28.68  | 11.19 | 1.04E-02 | 33.39  | 15.57 | 3.20E-02 | 12.66   | 39.85  | 7.51E-01 | 53.86  | 53.83 | 3.17E-01 | 22.44  | 18.63 | 2.28E-01 |
| cg15278374 | -8.05  | 3.14  | 1.04E-02 | -7.42  | 4.61  | 1.07E-01 | -4.99   | 7.97   | 5.31E-01 | -11.75 | 9.19  | 2.01E-01 | -9.35  | 6.14  | 1.28E-01 |
| cg06954520 | -8.91  | 3.48  | 1.04E-02 | -10.13 | 6.51  | 1.19E-01 | -4.84   | 11.01  | 6.60E-01 | -6.80  | 5.05  | 1.79E-01 | -16.39 | 9.25  | 7.64E-02 |
| cg11801110 | -13.85 | 5.41  | 1.04E-02 | -19.82 | 8.31  | 1.70E-02 | -10.78  | 11.51  | 3.49E-01 | -8.64  | 16.52 | 6.01E-01 | -8.65  | 10.83 | 4.24E-01 |
| cg23301492 | -43.43 | 16.95 | 1.04E-02 | -38.92 | 40.56 | 3.37E-01 | -375.26 | 203.99 | 6.58E-02 | -43.19 | 19.98 | 3.07E-02 | -29.98 | 54.01 | 5.79E-01 |
| cg10192196 | -21.51 | 8.40  | 1.04E-02 | -25.27 | 12.08 | 3.64E-02 | -37.23  | 23.62  | 1.15E-01 | -17.49 | 21.63 | 4.19E-01 | -8.16  | 17.16 | 6.34E-01 |
| cg18352935 | -11.58 | 4.52  | 1.04E-02 | -10.68 | 9.25  | 2.48E-01 | -6.61   | 13.35  | 6.20E-01 | -10.28 | 6.36  | 1.06E-01 | -21.64 | 11.97 | 7.06E-02 |
| cg16487292 | -37.54 | 14.65 | 1.04E-02 | -26.39 | 21.72 | 2.24E-01 | -7.74   | 36.53  | 8.32E-01 | -60.96 | 30.24 | 4.38E-02 | -66.80 | 37.93 | 7.82E-02 |
| cg18906520 | 18.23  | 7.12  | 1.04E-02 | 20.34  | 11.33 | 7.25E-02 | 23.36   | 13.62  | 8.63E-02 | 23.61  | 17.21 | 1.70E-01 | -1.29  | 17.70 | 9.42E-01 |
| cg02372856 | 16.84  | 6.57  | 1.04E-02 | 23.27  | 17.14 | 1.75E-01 | 12.21   | 25.19  | 6.28E-01 | 15.09  | 7.70  | 4.99E-02 | 28.56  | 27.96 | 3.07E-01 |
| cg23641722 | -10.84 | 4.23  | 1.04E-02 | -15.87 | 9.44  | 9.27E-02 | -33.51  | 21.08  | 1.12E-01 | -6.60  | 5.17  | 2.02E-01 | -21.19 | 14.22 | 1.36E-01 |
| cg09750084 | 8.13   | 3.18  | 1.04E-02 | 8.54   | 4.37  | 5.08E-02 | 16.00   | 7.96   | 4.44E-02 | -0.98  | 6.52  | 8.80E-01 | 12.05  | 7.67  | 1.16E-01 |

|            |        |       |          |         |       |          |         |        |          |        |       |          |        |       |          |
|------------|--------|-------|----------|---------|-------|----------|---------|--------|----------|--------|-------|----------|--------|-------|----------|
| cg14136506 | -28.99 | 11.32 | 1.04E-02 | -9.50   | 31.00 | 7.59E-01 | -80.17  | 146.37 | 5.84E-01 | -32.18 | 12.68 | 1.12E-02 | -25.12 | 44.54 | 5.73E-01 |
| cg04807470 | 16.99  | 6.64  | 1.04E-02 | 10.43   | 18.76 | 5.78E-01 | -3.15   | 76.04  | 9.67E-01 | 19.25  | 7.81  | 1.37E-02 | 12.46  | 17.43 | 4.75E-01 |
| cg01942423 | 10.07  | 3.93  | 1.04E-02 | 10.04   | 8.89  | 2.59E-01 | 1.38    | 16.52  | 9.34E-01 | 11.32  | 4.74  | 1.70E-02 | 4.13   | 15.90 | 7.95E-01 |
| cg27424148 | 21.54  | 8.41  | 1.04E-02 | 22.05   | 11.17 | 4.84E-02 | 48.49   | 31.89  | 1.28E-01 | -38.58 | 51.09 | 4.50E-01 | 19.95  | 14.50 | 1.69E-01 |
| cg04962027 | 17.55  | 6.85  | 1.04E-02 | 5.34    | 11.31 | 6.37E-01 | -1.35   | 35.17  | 9.69E-01 | 30.03  | 9.91  | 2.45E-03 | 13.74  | 16.78 | 4.13E-01 |
| cg13000789 | -16.52 | 6.45  | 1.04E-02 | -25.69  | 17.30 | 1.38E-01 | -62.81  | 33.25  | 5.89E-02 | -12.57 | 7.44  | 9.13E-02 | -15.83 | 24.02 | 5.10E-01 |
| cg02969343 | -73.46 | 28.69 | 1.04E-02 | -110.64 | 37.54 | 3.21E-03 | 100.11  | 188.01 | 5.94E-01 | -31.80 | 69.84 | 6.49E-01 | -26.04 | 60.57 | 6.67E-01 |
| cg15330117 | 26.72  | 10.43 | 1.04E-02 | 70.87   | 34.39 | 3.93E-02 | -1.06   | 47.45  | 9.82E-01 | 24.61  | 12.12 | 4.23E-02 | 16.91  | 30.35 | 5.77E-01 |
| cg23756272 | 9.18   | 3.59  | 1.05E-02 | 11.27   | 5.11  | 2.74E-02 | 9.47    | 7.75   | 2.22E-01 | 14.27  | 9.51  | 1.33E-01 | -2.81  | 9.21  | 7.61E-01 |
| cg07356555 | 16.35  | 6.38  | 1.05E-02 | 9.38    | 9.34  | 3.15E-01 | 12.79   | 12.71  | 3.14E-01 | 24.42  | 18.42 | 1.85E-01 | 36.27  | 15.96 | 2.31E-02 |
| cg07268734 | -13.26 | 5.18  | 1.05E-02 | -17.72  | 10.68 | 9.69E-02 | 5.21    | 15.11  | 7.30E-01 | -13.06 | 7.03  | 6.32E-02 | -25.03 | 16.03 | 1.18E-01 |
| cg19035004 | 34.33  | 13.41 | 1.05E-02 | 6.76    | 34.66 | 8.45E-01 | 142.80  | 194.84 | 4.64E-01 | 34.75  | 15.23 | 2.25E-02 | 80.74  | 50.37 | 1.09E-01 |
| cg23122650 | -8.24  | 3.22  | 1.05E-02 | -10.46  | 6.28  | 9.58E-02 | -12.99  | 9.61   | 1.76E-01 | -4.97  | 4.69  | 2.89E-01 | -10.92 | 8.16  | 1.81E-01 |
| cg26986911 | 27.93  | 10.91 | 1.05E-02 | 29.01   | 37.21 | 4.36E-01 | -44.95  | 130.10 | 7.30E-01 | 23.75  | 11.98 | 4.74E-02 | 78.82  | 39.44 | 4.57E-02 |
| cg27331316 | -15.59 | 6.09  | 1.05E-02 | -12.80  | 12.18 | 2.93E-01 | -14.94  | 15.93  | 3.48E-01 | -16.89 | 9.40  | 7.25E-02 | -16.93 | 14.19 | 2.33E-01 |
| cg03368787 | 33.58  | 13.12 | 1.05E-02 | 49.98   | 19.21 | 9.26E-03 | 8.68    | 29.20  | 7.66E-01 | -2.60  | 43.04 | 9.52E-01 | 36.68  | 26.86 | 1.72E-01 |
| cg02637031 | -16.22 | 6.34  | 1.05E-02 | -22.29  | 10.11 | 2.75E-02 | -22.73  | 14.69  | 1.22E-01 | -0.87  | 12.75 | 9.46E-01 | -17.36 | 15.18 | 2.53E-01 |
| cg04391356 | 28.51  | 11.14 | 1.05E-02 | 31.66   | 25.01 | 2.06E-01 | -82.32  | 118.61 | 4.88E-01 | 24.89  | 13.10 | 5.74E-02 | 71.27  | 42.28 | 9.18E-02 |
| cg27177158 | 18.62  | 7.28  | 1.05E-02 | 23.95   | 10.51 | 2.28E-02 | 23.93   | 27.86  | 3.90E-01 | 31.17  | 32.59 | 3.39E-01 | 9.85   | 11.46 | 3.91E-01 |
| cg07237926 | -10.15 | 3.96  | 1.05E-02 | -8.53   | 5.21  | 1.02E-01 | -14.50  | 9.93   | 1.44E-01 | -14.49 | 12.25 | 2.37E-01 | -8.80  | 9.99  | 3.78E-01 |
| cg21961970 | 20.30  | 7.93  | 1.05E-02 | 32.41   | 19.15 | 9.06E-02 | 40.47   | 37.13  | 2.76E-01 | 15.41  | 9.34  | 9.90E-02 | 28.94  | 32.01 | 3.66E-01 |
| cg15223579 | 20.71  | 8.09  | 1.05E-02 | 15.58   | 10.15 | 1.25E-01 | 45.68   | 23.48  | 5.17E-02 | -18.35 | 31.65 | 5.62E-01 | 28.67  | 14.16 | 4.30E-02 |
| cg10960055 | -4.39  | 1.71  | 1.05E-02 | -5.96   | 2.43  | 1.43E-02 | -4.80   | 4.27   | 2.60E-01 | -6.07  | 4.79  | 2.05E-01 | 0.57   | 3.70  | 8.77E-01 |
| cg03962019 | -21.20 | 8.28  | 1.05E-02 | -24.70  | 14.77 | 9.44E-02 | -26.18  | 15.49  | 9.10E-02 | -8.28  | 18.42 | 6.53E-01 | -21.63 | 18.66 | 2.46E-01 |
| cg01054502 | -60.54 | 23.66 | 1.05E-02 | -17.11  | 64.57 | 7.91E-01 | -538.91 | 290.11 | 6.32E-02 | -60.19 | 22.16 | 6.60E-03 | -77.93 | 59.60 | 1.91E-01 |
| cg12727680 | -15.95 | 6.23  | 1.05E-02 | -21.00  | 13.77 | 1.27E-01 | -16.91  | 25.96  | 5.15E-01 | -9.99  | 7.82  | 2.02E-01 | -42.23 | 19.47 | 3.01E-02 |
| cg09100654 | 12.67  | 4.95  | 1.05E-02 | 20.96   | 8.66  | 1.55E-02 | 18.65   | 12.50  | 1.36E-01 | 7.76   | 9.86  | 4.32E-01 | 3.52   | 9.65  | 7.15E-01 |
| cg21060429 | 15.52  | 6.07  | 1.05E-02 | 7.34    | 10.75 | 4.95E-01 | 24.63   | 18.24  | 1.77E-01 | 17.31  | 8.64  | 4.51E-02 | 24.64  | 21.68 | 2.56E-01 |
| cg23166590 | 10.53  | 4.11  | 1.05E-02 | 16.81   | 8.85  | 5.77E-02 | 8.83    | 11.72  | 4.51E-01 | 8.50   | 5.36  | 1.13E-01 | 11.24  | 15.49 | 4.68E-01 |
| cg27139077 | -36.30 | 14.19 | 1.05E-02 | -37.17  | 34.76 | 2.85E-01 | -69.70  | 182.70 | 7.03E-01 | -31.16 | 16.33 | 5.64E-02 | -84.75 | 52.56 | 1.07E-01 |
| cg05662684 | 50.04  | 19.56 | 1.05E-02 | 71.07   | 26.52 | 7.36E-03 | 9.49    | 69.54  | 8.91E-01 | 43.44  | 43.22 | 3.15E-01 | 10.09  | 47.12 | 8.30E-01 |
| cg04681879 | 21.45  | 8.38  | 1.05E-02 | 25.73   | 21.01 | 2.21E-01 | 13.25   | 22.61  | 5.58E-01 | 17.85  | 10.67 | 9.42E-02 | 52.79  | 28.72 | 6.61E-02 |
| cg03138405 | 41.31  | 16.15 | 1.05E-02 | 38.23   | 19.42 | 4.91E-02 | 31.49   | 72.55  | 6.64E-01 | 94.82  | 59.38 | 1.10E-01 | 34.11  | 37.50 | 3.63E-01 |
| cg04572085 | 19.31  | 7.55  | 1.05E-02 | 29.14   | 10.76 | 6.77E-03 | 26.62   | 17.33  | 1.25E-01 | -2.29  | 23.86 | 9.24E-01 | 2.21   | 15.62 | 8.88E-01 |
| cg19734030 | -35.80 | 13.99 | 1.05E-02 | -19.30  | 24.35 | 4.28E-01 | 42.37   | 255.80 | 8.68E-01 | -48.57 | 18.11 | 7.31E-03 | -7.84  | 53.13 | 8.83E-01 |

|            |        |       |          |         |       |          |         |        |          |        |       |          |         |       |          |
|------------|--------|-------|----------|---------|-------|----------|---------|--------|----------|--------|-------|----------|---------|-------|----------|
| cg15454110 | -12.01 | 4.69  | 1.05E-02 | -17.51  | 7.80  | 2.48E-02 | -7.84   | 11.49  | 4.95E-01 | -10.78 | 8.94  | 2.28E-01 | -7.12   | 10.60 | 5.02E-01 |
| cg17168836 | -14.16 | 5.54  | 1.05E-02 | -12.10  | 7.64  | 1.13E-01 | -22.46  | 14.19  | 1.13E-01 | -12.95 | 16.52 | 4.33E-01 | -13.93  | 12.06 | 2.48E-01 |
| cg00397422 | 14.90  | 5.82  | 1.05E-02 | 25.90   | 12.40 | 3.68E-02 | 10.91   | 15.68  | 4.87E-01 | 13.71  | 7.90  | 8.27E-02 | 2.42    | 18.52 | 8.96E-01 |
| cg26312493 | -55.02 | 21.51 | 1.05E-02 | -62.17  | 34.72 | 7.34E-02 | -27.12  | 135.09 | 8.41E-01 | -53.45 | 37.61 | 1.55E-01 | -49.24  | 41.87 | 2.40E-01 |
| cg23409168 | -12.57 | 4.91  | 1.05E-02 | 2.22    | 13.20 | 8.66E-01 | -33.36  | 22.44  | 1.37E-01 | -12.44 | 5.76  | 3.09E-02 | -25.81  | 16.69 | 1.22E-01 |
| cg15056687 | -74.01 | 28.93 | 1.05E-02 | -76.05  | 80.06 | 3.42E-01 | -474.26 | 369.85 | 2.00E-01 | -66.28 | 33.40 | 4.72E-02 | -101.28 | 86.11 | 2.40E-01 |
| cg23415995 | 8.05   | 3.15  | 1.05E-02 | 5.47    | 4.22  | 1.94E-01 | 12.64   | 8.02   | 1.15E-01 | 12.08  | 9.45  | 2.01E-01 | 9.61    | 7.45  | 1.97E-01 |
| cg20195957 | 15.34  | 6.00  | 1.05E-02 | 38.35   | 14.60 | 8.60E-03 | 10.92   | 38.91  | 7.79E-01 | 10.93  | 6.83  | 1.10E-01 | 7.46    | 25.24 | 7.67E-01 |
| cg06511389 | -45.53 | 17.80 | 1.05E-02 | -89.14  | 49.57 | 7.21E-02 | 74.22   | 267.66 | 7.82E-01 | -43.84 | 20.41 | 3.17E-02 | -9.52   | 54.75 | 8.62E-01 |
| cg24090068 | -38.72 | 15.14 | 1.05E-02 | -0.43   | 44.01 | 9.92E-01 | -144.15 | 162.55 | 3.75E-01 | -41.52 | 16.90 | 1.40E-02 | -58.19  | 57.10 | 3.08E-01 |
| cg13425637 | 34.80  | 13.61 | 1.05E-02 | 32.18   | 56.73 | 5.71E-01 | -244.24 | 205.48 | 2.35E-01 | 34.56  | 14.50 | 1.71E-02 | 62.47   | 56.90 | 2.72E-01 |
| cg07671221 | 19.00  | 7.43  | 1.05E-02 | 19.04   | 10.06 | 5.84E-02 | 3.01    | 16.99  | 8.59E-01 | 66.84  | 38.51 | 8.26E-02 | 24.52   | 15.60 | 1.16E-01 |
| cg01963134 | 18.98  | 7.42  | 1.05E-02 | 27.03   | 26.18 | 3.02E-01 | 4.73    | 55.22  | 9.32E-01 | 21.40  | 8.30  | 9.93E-03 | -3.77   | 23.21 | 8.71E-01 |
| cg16340152 | -20.39 | 7.97  | 1.06E-02 | -13.02  | 16.64 | 4.34E-01 | -39.71  | 42.50  | 3.50E-01 | -23.56 | 9.87  | 1.69E-02 | -7.48   | 27.87 | 7.89E-01 |
| cg06747288 | -14.96 | 5.85  | 1.06E-02 | -14.46  | 8.38  | 8.44E-02 | -13.22  | 14.31  | 3.56E-01 | -16.79 | 14.13 | 2.35E-01 | -16.24  | 14.05 | 2.48E-01 |
| cg27586249 | 20.60  | 8.06  | 1.06E-02 | 24.30   | 12.41 | 5.03E-02 | 10.35   | 17.65  | 5.58E-01 | 8.23   | 9.91  | 4.06E-01 | 43.99   | 14.69 | 2.75E-03 |
| cg25539045 | 14.00  | 5.48  | 1.06E-02 | 22.76   | 12.16 | 6.13E-02 | 16.15   | 21.09  | 4.44E-01 | 13.05  | 7.20  | 6.99E-02 | 4.92    | 14.12 | 7.28E-01 |
| cg20507228 | 8.05   | 3.15  | 1.06E-02 | 9.30    | 4.25  | 2.87E-02 | 12.35   | 7.18   | 8.53E-02 | 7.33   | 9.75  | 4.52E-01 | -1.26   | 8.01  | 8.75E-01 |
| cg01881265 | 25.10  | 9.82  | 1.06E-02 | 14.32   | 16.95 | 3.98E-01 | 57.10   | 19.13  | 2.84E-03 | 15.00  | 11.64 | 1.97E-01 | 27.32   | 26.90 | 3.10E-01 |
| cg09142313 | 14.98  | 5.86  | 1.06E-02 | 28.92   | 14.95 | 5.31E-02 | 5.98    | 17.93  | 7.39E-01 | 13.71  | 8.65  | 1.13E-01 | 12.84   | 11.05 | 2.45E-01 |
| cg24060890 | -9.09  | 3.56  | 1.06E-02 | -11.43  | 7.34  | 1.20E-01 | 3.33    | 10.97  | 7.62E-01 | -12.25 | 4.81  | 1.09E-02 | -0.52   | 10.60 | 9.61E-01 |
| cg03289833 | -13.71 | 5.37  | 1.06E-02 | -17.65  | 15.84 | 2.65E-01 | -13.17  | 28.21  | 6.41E-01 | -15.31 | 6.02  | 1.10E-02 | 17.41   | 22.96 | 4.48E-01 |
| cg00019877 | -17.79 | 6.96  | 1.06E-02 | -22.49  | 17.46 | 1.98E-01 | 13.82   | 21.18  | 5.14E-01 | -18.27 | 7.12  | 1.03E-02 | -38.46  | 20.57 | 6.16E-02 |
| cg04217177 | 4.67   | 1.83  | 1.06E-02 | 1.97    | 3.07  | 5.21E-01 | 3.95    | 3.95   | 3.18E-01 | 7.55   | 3.40  | 2.66E-02 | 6.62    | 4.82  | 1.69E-01 |
| cg12172441 | 11.68  | 4.57  | 1.06E-02 | 6.66    | 6.76  | 3.24E-01 | 6.42    | 15.99  | 6.88E-01 | 24.89  | 11.12 | 2.52E-02 | 13.37   | 8.46  | 1.14E-01 |
| cg05791881 | -21.81 | 8.54  | 1.06E-02 | -16.09  | 16.76 | 3.37E-01 | 17.54   | 44.28  | 6.92E-01 | -22.12 | 10.86 | 4.17E-02 | -53.76  | 29.06 | 6.43E-02 |
| cg04516896 | 21.27  | 8.32  | 1.06E-02 | 16.21   | 18.60 | 3.83E-01 | 22.87   | 21.67  | 2.91E-01 | 16.45  | 11.34 | 1.47E-01 | 50.96   | 24.71 | 3.92E-02 |
| cg01955025 | 14.16  | 5.54  | 1.06E-02 | 13.38   | 7.66  | 8.05E-02 | 23.17   | 11.83  | 5.02E-02 | -5.97  | 18.39 | 7.45E-01 | 15.75   | 13.62 | 2.47E-01 |
| cg00749323 | 20.57  | 8.05  | 1.06E-02 | 27.60   | 18.16 | 1.29E-01 | -2.47   | 45.73  | 9.57E-01 | 16.79  | 9.54  | 7.83E-02 | 54.51   | 32.92 | 9.77E-02 |
| cg11170318 | 8.79   | 3.44  | 1.06E-02 | 9.02    | 4.83  | 6.16E-02 | 4.77    | 7.59   | 5.30E-01 | 11.24  | 11.53 | 3.30E-01 | 11.27   | 7.74  | 1.45E-01 |
| cg08520423 | 19.29  | 7.55  | 1.06E-02 | 28.89   | 10.37 | 5.33E-03 | 17.71   | 21.70  | 4.15E-01 | 14.17  | 30.78 | 6.45E-01 | 3.38    | 14.06 | 8.10E-01 |
| cg05657090 | 24.66  | 9.65  | 1.06E-02 | 31.37   | 17.80 | 7.80E-02 | 13.51   | 23.67  | 5.68E-01 | 11.28  | 16.61 | 4.97E-01 | 46.44   | 21.47 | 3.06E-02 |
| cg03550727 | -14.63 | 5.73  | 1.06E-02 | -24.85  | 9.78  | 1.11E-02 | -8.01   | 13.35  | 5.49E-01 | -12.33 | 12.04 | 3.06E-01 | -7.48   | 11.53 | 5.16E-01 |
| cg14158712 | -76.79 | 30.05 | 1.06E-02 | -134.93 | 46.34 | 3.59E-03 | 97.88   | 234.62 | 6.77E-01 | -41.23 | 17.55 | 1.88E-02 | -108.83 | 54.09 | 4.42E-02 |
| cg11856822 | 18.27  | 7.15  | 1.06E-02 | 37.91   | 19.98 | 5.78E-02 | 12.83   | 19.60  | 5.13E-01 | 17.46  | 9.63  | 6.97E-02 | 11.09   | 16.51 | 5.02E-01 |

|            |        |       |          |        |       |          |         |        |          |        |       |          |        |       |          |
|------------|--------|-------|----------|--------|-------|----------|---------|--------|----------|--------|-------|----------|--------|-------|----------|
| cg07812715 | 12.36  | 4.84  | 1.06E-02 | 12.79  | 7.15  | 7.37E-02 | 16.78   | 10.60  | 1.13E-01 | 3.31   | 12.30 | 7.88E-01 | 13.91  | 11.42 | 2.23E-01 |
| cg07998213 | 11.79  | 4.61  | 1.06E-02 | 13.28  | 7.78  | 8.79E-02 | 15.39   | 10.27  | 1.34E-01 | 19.12  | 11.22 | 8.83E-02 | 2.79   | 8.77  | 7.51E-01 |
| cg13488395 | -28.91 | 11.32 | 1.06E-02 | -43.00 | 44.58 | 3.35E-01 | 24.58   | 183.06 | 8.93E-01 | -30.56 | 12.11 | 1.16E-02 | 8.04   | 47.02 | 8.64E-01 |
| cg11024341 | 39.48  | 15.46 | 1.06E-02 | 29.48  | 19.91 | 1.39E-01 | 53.24   | 63.39  | 4.01E-01 | 50.10  | 44.94 | 2.65E-01 | 57.48  | 32.98 | 8.14E-02 |
| cg05553829 | -8.49  | 3.32  | 1.06E-02 | -9.22  | 4.81  | 5.50E-02 | -5.81   | 7.91   | 4.62E-01 | -13.31 | 8.43  | 1.14E-01 | -5.18  | 7.63  | 4.97E-01 |
| cg27104809 | 20.31  | 7.95  | 1.06E-02 | 29.58  | 22.56 | 1.90E-01 | -1.80   | 74.62  | 9.81E-01 | 18.20  | 8.96  | 4.22E-02 | 30.32  | 28.75 | 2.92E-01 |
| cg25241559 | -22.88 | 8.96  | 1.06E-02 | -26.05 | 11.47 | 2.31E-02 | -4.63   | 37.69  | 9.02E-01 | -51.81 | 24.45 | 3.41E-02 | -0.79  | 19.29 | 9.67E-01 |
| cg02535674 | 13.86  | 5.43  | 1.06E-02 | 12.29  | 8.72  | 1.59E-01 | -13.68  | 38.02  | 7.19E-01 | 17.97  | 7.59  | 1.78E-02 | 2.26   | 19.15 | 9.06E-01 |
| cg16028336 | -25.38 | 9.94  | 1.06E-02 | -5.60  | 21.01 | 7.90E-01 | 8.14    | 47.80  | 8.65E-01 | -37.28 | 12.60 | 3.09E-03 | -11.59 | 29.75 | 6.97E-01 |
| cg20626964 | 24.28  | 9.51  | 1.06E-02 | 27.00  | 14.37 | 6.02E-02 | 12.89   | 20.61  | 5.32E-01 | 30.80  | 27.61 | 2.65E-01 | 26.26  | 19.78 | 1.84E-01 |
| cg25179685 | -12.96 | 5.07  | 1.07E-02 | -20.49 | 9.48  | 3.06E-02 | -21.36  | 13.17  | 1.05E-01 | -6.18  | 9.63  | 5.21E-01 | -7.65  | 9.46  | 4.19E-01 |
| cg17056789 | 16.79  | 6.58  | 1.07E-02 | 12.68  | 11.84 | 2.84E-01 | 23.42   | 16.04  | 1.44E-01 | 9.16   | 10.82 | 3.97E-01 | 36.12  | 16.76 | 3.11E-02 |
| cg16517394 | 25.01  | 9.79  | 1.07E-02 | 29.25  | 12.12 | 1.58E-02 | -0.55   | 31.76  | 9.86E-01 | 2.90   | 37.33 | 9.38E-01 | 31.51  | 22.91 | 1.69E-01 |
| cg17772649 | 8.48   | 3.32  | 1.07E-02 | 6.61   | 4.24  | 1.19E-01 | 14.41   | 7.84   | 6.60E-02 | 20.64  | 10.37 | 4.66E-02 | 0.13   | 8.71  | 9.88E-01 |
| cg26682517 | -20.13 | 7.88  | 1.07E-02 | -36.85 | 18.19 | 4.27E-02 | -4.97   | 18.69  | 7.90E-01 | -12.67 | 9.91  | 2.01E-01 | -41.59 | 19.30 | 3.12E-02 |
| cg09622504 | -17.92 | 7.02  | 1.07E-02 | -27.56 | 15.12 | 6.84E-02 | -25.69  | 81.34  | 7.52E-01 | -18.43 | 8.32  | 2.67E-02 | 20.07  | 27.36 | 4.63E-01 |
| cg13775575 | 46.72  | 18.30 | 1.07E-02 | -29.18 | 60.57 | 6.30E-01 | -66.98  | 214.34 | 7.55E-01 | 53.19  | 20.42 | 9.19E-03 | 72.74  | 58.32 | 2.12E-01 |
| cg26562691 | -9.66  | 3.78  | 1.07E-02 | -11.07 | 6.13  | 7.11E-02 | -13.26  | 9.30   | 1.54E-01 | -6.31  | 7.45  | 3.97E-01 | -8.28  | 8.53  | 3.32E-01 |
| cg19602920 | -27.84 | 10.90 | 1.07E-02 | -11.04 | 29.83 | 7.11E-01 | -120.47 | 124.76 | 3.34E-01 | -29.10 | 12.34 | 1.83E-02 | -34.94 | 39.10 | 3.71E-01 |
| cg21853806 | 23.41  | 9.17  | 1.07E-02 | 38.49  | 16.47 | 1.95E-02 | 15.42   | 17.04  | 3.65E-01 | 17.07  | 17.87 | 3.39E-01 | 18.38  | 24.73 | 4.57E-01 |
| cg25149253 | -13.48 | 5.28  | 1.07E-02 | -7.15  | 9.98  | 4.73E-01 | -29.04  | 17.51  | 9.73E-02 | -16.23 | 8.07  | 4.43E-02 | -9.40  | 11.78 | 4.25E-01 |
| cg13765278 | -7.30  | 2.86  | 1.07E-02 | -8.31  | 4.05  | 4.02E-02 | -2.77   | 6.47   | 6.69E-01 | -15.86 | 10.84 | 1.44E-01 | -6.40  | 5.88  | 2.76E-01 |
| cg13519191 | -10.18 | 3.99  | 1.07E-02 | -18.53 | 7.66  | 1.55E-02 | -13.74  | 12.09  | 2.56E-01 | -5.02  | 5.94  | 3.98E-01 | -8.23  | 9.67  | 3.95E-01 |
| cg13719287 | -11.13 | 4.36  | 1.07E-02 | -15.37 | 6.29  | 1.46E-02 | -4.77   | 10.66  | 6.54E-01 | 3.19   | 14.05 | 8.20E-01 | -12.72 | 8.62  | 1.40E-01 |
| cg20704159 | 8.36   | 3.27  | 1.07E-02 | 10.18  | 4.31  | 1.81E-02 | -0.72   | 7.92   | 9.28E-01 | 14.30  | 13.76 | 2.99E-01 | 9.20   | 7.43  | 2.16E-01 |
| cg03155200 | 6.09   | 2.39  | 1.07E-02 | 5.46   | 3.18  | 8.61E-02 | 7.97    | 4.77   | 9.48E-02 | 3.08   | 9.28  | 7.40E-01 | 6.78   | 6.86  | 3.23E-01 |
| cg03561416 | 22.12  | 8.67  | 1.07E-02 | 26.41  | 10.34 | 1.06E-02 | 36.11   | 12.03  | 2.68E-03 | 21.82  | 18.78 | 2.45E-01 | -9.05  | 17.54 | 6.06E-01 |
| cg18148375 | -15.45 | 6.05  | 1.07E-02 | -24.22 | 9.32  | 9.38E-03 | 5.44    | 15.63  | 7.28E-01 | -17.21 | 13.91 | 2.16E-01 | -11.70 | 12.38 | 3.45E-01 |
| cg16632924 | -22.95 | 8.99  | 1.07E-02 | -12.36 | 19.58 | 5.28E-01 | -29.90  | 48.86  | 5.41E-01 | -28.39 | 10.94 | 9.46E-03 | -1.98  | 31.72 | 9.50E-01 |
| cg17826763 | 15.20  | 5.96  | 1.07E-02 | 14.49  | 12.79 | 2.57E-01 | 25.54   | 20.24  | 2.07E-01 | 16.09  | 7.84  | 4.01E-02 | 4.64   | 17.29 | 7.89E-01 |
| cg00434535 | -7.50  | 2.94  | 1.07E-02 | -5.40  | 5.66  | 3.40E-01 | -8.03   | 8.64   | 3.53E-01 | -9.43  | 4.11  | 2.18E-02 | -2.88  | 9.10  | 7.52E-01 |
| cg13247398 | 10.78  | 4.22  | 1.07E-02 | 11.34  | 6.31  | 7.21E-02 | 12.69   | 8.63   | 1.41E-01 | 3.29   | 12.24 | 7.88E-01 | 11.70  | 9.61  | 2.24E-01 |
| cg19255818 | -19.13 | 7.50  | 1.07E-02 | -15.73 | 16.74 | 3.47E-01 | -8.76   | 21.96  | 6.90E-01 | -20.93 | 9.71  | 3.11E-02 | -28.45 | 25.42 | 2.63E-01 |
| cg11157076 | -19.37 | 7.59  | 1.07E-02 | -32.04 | 20.04 | 1.10E-01 | -70.13  | 48.74  | 1.50E-01 | -16.83 | 8.76  | 5.47E-02 | -5.29  | 26.59 | 8.42E-01 |
| cg05170353 | -35.28 | 13.83 | 1.07E-02 | -49.15 | 28.44 | 8.39E-02 | -8.52   | 58.62  | 8.84E-01 | -38.31 | 18.80 | 4.16E-02 | -14.74 | 33.82 | 6.63E-01 |

|            |        |       |          |        |       |          |         |        |          |        |       |          |        |       |          |
|------------|--------|-------|----------|--------|-------|----------|---------|--------|----------|--------|-------|----------|--------|-------|----------|
| cg00050336 | -13.26 | 5.20  | 1.07E-02 | -18.54 | 7.64  | 1.53E-02 | -7.45   | 12.52  | 5.52E-01 | -9.80  | 12.13 | 4.19E-01 | -8.82  | 12.20 | 4.70E-01 |
| cg22089878 | 28.45  | 11.15 | 1.07E-02 | 26.09  | 13.91 | 6.06E-02 | -22.68  | 54.84  | 6.79E-01 | 0.00   | 55.17 | 1.00E+00 | 45.92  | 21.28 | 3.10E-02 |
| cg07362341 | 24.83  | 9.73  | 1.07E-02 | 22.64  | 12.91 | 7.95E-02 | 41.69   | 32.87  | 2.05E-01 | 55.81  | 32.64 | 8.73E-02 | 13.10  | 19.27 | 4.96E-01 |
| cg20779239 | 25.52  | 10.01 | 1.07E-02 | 26.00  | 16.90 | 1.24E-01 | 20.02   | 30.69  | 5.14E-01 | 43.28  | 17.17 | 1.17E-02 | -2.08  | 22.19 | 9.25E-01 |
| cg13897468 | 15.11  | 5.92  | 1.07E-02 | 29.72  | 14.00 | 3.38E-02 | 18.67   | 20.38  | 3.59E-01 | 8.60   | 7.25  | 2.36E-01 | 35.90  | 22.56 | 1.12E-01 |
| cg21526019 | 9.83   | 3.86  | 1.08E-02 | 12.38  | 5.20  | 1.74E-02 | 14.96   | 9.84   | 1.29E-01 | 6.79   | 9.54  | 4.77E-01 | -2.68  | 10.50 | 7.98E-01 |
| cg27388703 | -43.38 | 17.01 | 1.08E-02 | -40.44 | 20.51 | 4.86E-02 | -170.07 | 77.56  | 2.83E-02 | 12.14  | 74.76 | 8.71E-01 | -39.03 | 26.12 | 1.35E-01 |
| cg17617843 | 14.19  | 5.56  | 1.08E-02 | 16.12  | 8.09  | 4.63E-02 | 11.55   | 13.12  | 3.79E-01 | 37.63  | 18.56 | 4.26E-02 | 4.31   | 10.96 | 6.94E-01 |
| cg12336777 | 12.65  | 4.96  | 1.08E-02 | 17.79  | 8.41  | 3.44E-02 | 14.58   | 15.50  | 3.47E-01 | 8.41   | 8.37  | 3.15E-01 | 10.15  | 11.13 | 3.62E-01 |
| cg26010756 | 21.92  | 8.59  | 1.08E-02 | 17.85  | 16.23 | 2.71E-01 | -13.59  | 23.43  | 5.62E-01 | 25.18  | 8.98  | 5.04E-03 | 45.25  | 20.54 | 2.76E-02 |
| cg19356854 | -21.64 | 8.48  | 1.08E-02 | -2.15  | 30.85 | 9.44E-01 | 113.28  | 139.62 | 4.17E-01 | -24.36 | 9.01  | 6.88E-03 | -8.96  | 45.42 | 8.44E-01 |
| cg04549418 | 23.89  | 9.37  | 1.08E-02 | 32.26  | 15.11 | 3.27E-02 | 25.59   | 17.16  | 1.36E-01 | 11.02  | 22.55 | 6.25E-01 | 13.51  | 24.59 | 5.83E-01 |
| cg21295838 | 15.11  | 5.93  | 1.08E-02 | 19.88  | 9.41  | 3.46E-02 | 1.56    | 15.92  | 9.22E-01 | 23.84  | 11.43 | 3.69E-02 | 3.05   | 13.40 | 8.20E-01 |
| cg20220678 | -9.84  | 3.86  | 1.08E-02 | -8.76  | 6.81  | 1.99E-01 | -0.65   | 9.11   | 9.43E-01 | -11.14 | 6.17  | 7.10E-02 | -23.37 | 11.65 | 4.49E-02 |
| cg21552081 | 18.40  | 7.22  | 1.08E-02 | 11.11  | 11.08 | 3.16E-01 | 31.25   | 15.57  | 4.48E-02 | 24.20  | 16.17 | 1.34E-01 | 13.33  | 17.92 | 4.57E-01 |
| cg15769388 | -11.41 | 4.48  | 1.08E-02 | -16.44 | 10.42 | 1.15E-01 | -9.89   | 15.34  | 5.19E-01 | -10.05 | 5.80  | 8.34E-02 | -11.52 | 12.15 | 3.43E-01 |
| cg15961904 | -13.95 | 5.47  | 1.08E-02 | -37.19 | 14.40 | 9.81E-03 | -6.96   | 13.82  | 6.15E-01 | -10.22 | 6.72  | 1.29E-01 | -13.44 | 14.16 | 3.43E-01 |
| cg08699181 | 39.10  | 15.34 | 1.08E-02 | 42.51  | 19.35 | 2.80E-02 | 34.68   | 46.49  | 4.56E-01 | 117.21 | 59.71 | 4.97E-02 | 4.49   | 34.55 | 8.97E-01 |
| cg10027639 | -9.10  | 3.57  | 1.08E-02 | -16.02 | 7.25  | 2.70E-02 | -0.87   | 9.58   | 9.28E-01 | -10.13 | 5.17  | 5.02E-02 | -1.88  | 9.44  | 8.42E-01 |
| cg09361748 | -13.89 | 5.45  | 1.08E-02 | -23.22 | 8.24  | 4.84E-03 | 0.84    | 13.11  | 9.49E-01 | -8.39  | 14.17 | 5.54E-01 | -10.91 | 11.08 | 3.25E-01 |
| cg03317517 | 16.14  | 6.33  | 1.08E-02 | 29.19  | 9.98  | 3.47E-03 | 12.65   | 23.91  | 5.97E-01 | 9.77   | 20.01 | 6.25E-01 | 5.93   | 9.69  | 5.41E-01 |
| cg13578229 | -40.14 | 15.75 | 1.08E-02 | -60.80 | 30.39 | 4.54E-02 | -57.93  | 196.10 | 7.68E-01 | -25.98 | 19.85 | 1.91E-01 | -74.31 | 51.03 | 1.45E-01 |
| cg13531120 | -10.63 | 4.17  | 1.08E-02 | -15.56 | 6.46  | 1.59E-02 | -6.50   | 9.93   | 5.13E-01 | -16.13 | 13.27 | 2.24E-01 | -4.52  | 7.54  | 5.48E-01 |
| cg24115922 | 24.79  | 9.73  | 1.08E-02 | 40.97  | 20.41 | 4.47E-02 | 112.44  | 104.50 | 2.82E-01 | 14.20  | 9.72  | 1.44E-01 | 49.63  | 27.10 | 6.71E-02 |
| cg00025795 | 24.05  | 9.44  | 1.08E-02 | 43.63  | 18.70 | 1.97E-02 | 12.25   | 18.86  | 5.16E-01 | 12.12  | 15.72 | 4.41E-01 | 40.78  | 25.68 | 1.12E-01 |
| cg03391055 | 37.06  | 14.54 | 1.08E-02 | 57.48  | 34.70 | 9.76E-02 | -48.11  | 82.57  | 5.60E-01 | 37.20  | 17.44 | 3.30E-02 | 26.44  | 46.42 | 5.69E-01 |
| cg27212428 | -11.72 | 4.60  | 1.08E-02 | -8.19  | 10.68 | 4.43E-01 | -20.38  | 14.23  | 1.52E-01 | -11.43 | 5.91  | 5.30E-02 | -11.02 | 14.29 | 4.41E-01 |
| cg13235761 | 15.58  | 6.11  | 1.08E-02 | 12.57  | 8.26  | 1.28E-01 | 26.21   | 13.88  | 5.90E-02 | 29.17  | 20.29 | 1.51E-01 | 5.72   | 14.95 | 7.02E-01 |
| cg24292761 | 10.27  | 4.03  | 1.08E-02 | 10.07  | 6.41  | 1.16E-01 | 18.62   | 8.88   | 3.59E-02 | 13.29  | 10.08 | 1.88E-01 | 1.37   | 8.24  | 8.67E-01 |
| cg09968702 | -9.75  | 3.83  | 1.08E-02 | -7.20  | 5.53  | 1.93E-01 | -1.83   | 8.59   | 8.31E-01 | -15.83 | 15.34 | 3.02E-01 | -19.05 | 7.51  | 1.12E-02 |
| cg02441149 | -10.28 | 4.04  | 1.08E-02 | -15.75 | 9.05  | 8.18E-02 | -14.04  | 17.81  | 4.30E-01 | -8.17  | 5.06  | 1.07E-01 | -10.84 | 11.92 | 3.63E-01 |
| cg03308056 | 20.24  | 7.94  | 1.08E-02 | 15.10  | 19.06 | 4.28E-01 | 32.12   | 33.68  | 3.40E-01 | 25.32  | 9.53  | 7.87E-03 | -23.63 | 28.97 | 4.15E-01 |
| cg02618229 | 16.23  | 6.37  | 1.08E-02 | 11.21  | 12.12 | 3.55E-01 | 13.75   | 29.69  | 6.43E-01 | 19.16  | 8.64  | 2.65E-02 | 15.55  | 17.44 | 3.73E-01 |
| cg01519765 | 13.07  | 5.13  | 1.08E-02 | 15.72  | 9.07  | 8.30E-02 | 4.06    | 11.97  | 7.34E-01 | 15.87  | 10.77 | 1.41E-01 | 13.72  | 9.89  | 1.66E-01 |
| cg08139512 | -16.23 | 6.37  | 1.08E-02 | -24.69 | 9.78  | 1.15E-02 | -15.52  | 13.64  | 2.55E-01 | -1.72  | 17.89 | 9.23E-01 | -9.29  | 13.29 | 4.85E-01 |

|            |        |       |          |        |       |          |        |       |          |         |       |          |        |       |          |
|------------|--------|-------|----------|--------|-------|----------|--------|-------|----------|---------|-------|----------|--------|-------|----------|
| cg23679332 | 19.92  | 7.82  | 1.08E-02 | 18.38  | 19.96 | 3.57E-01 | 33.62  | 37.67 | 3.72E-01 | 18.86   | 9.17  | 3.98E-02 | 25.25  | 28.13 | 3.69E-01 |
| cg13757263 | -8.33  | 3.27  | 1.08E-02 | -10.17 | 4.85  | 3.59E-02 | -4.21  | 7.78  | 5.88E-01 | -6.70   | 7.32  | 3.60E-01 | -9.56  | 7.93  | 2.28E-01 |
| cg26010734 | 12.38  | 4.86  | 1.08E-02 | 24.50  | 14.10 | 8.24E-02 | 87.51  | 62.87 | 1.64E-01 | 9.16    | 5.47  | 9.43E-02 | 19.86  | 16.47 | 2.28E-01 |
| cg05872758 | -11.62 | 4.56  | 1.08E-02 | -12.05 | 6.93  | 8.21E-02 | -9.14  | 9.92  | 3.57E-01 | -2.70   | 12.04 | 8.23E-01 | -19.25 | 9.91  | 5.19E-02 |
| cg17977273 | 8.34   | 3.27  | 1.09E-02 | 9.66   | 4.88  | 4.81E-02 | 8.27   | 7.18  | 2.49E-01 | 5.95    | 8.41  | 4.79E-01 | 7.21   | 7.49  | 3.35E-01 |
| cg27338109 | 22.05  | 8.66  | 1.09E-02 | 36.58  | 19.52 | 6.09E-02 | 13.20  | 16.64 | 4.27E-01 | 16.86   | 12.85 | 1.89E-01 | 46.07  | 30.83 | 1.35E-01 |
| cg10147462 | 11.28  | 4.43  | 1.09E-02 | 17.12  | 10.57 | 1.05E-01 | 31.80  | 13.98 | 2.29E-02 | 7.10    | 4.83  | 1.42E-01 | 8.49   | 13.63 | 5.33E-01 |
| cg02879776 | -10.79 | 4.24  | 1.09E-02 | -16.31 | 7.91  | 3.92E-02 | -1.92  | 12.93 | 8.82E-01 | -9.09   | 6.45  | 1.58E-01 | -11.41 | 10.18 | 2.62E-01 |
| cg09202851 | 14.02  | 5.50  | 1.09E-02 | 5.32   | 8.27  | 5.20E-01 | 18.01  | 10.86 | 9.73E-02 | 13.78   | 17.88 | 4.41E-01 | 27.91  | 12.14 | 2.15E-02 |
| cg21195162 | -9.56  | 3.75  | 1.09E-02 | -14.95 | 6.25  | 1.68E-02 | 0.52   | 12.11 | 9.65E-01 | -10.18  | 5.55  | 6.68E-02 | 4.82   | 12.69 | 7.04E-01 |
| cg10065153 | 11.72  | 4.60  | 1.09E-02 | 10.26  | 6.78  | 1.30E-01 | 3.47   | 9.53  | 7.15E-01 | 24.43   | 10.34 | 1.81E-02 | 12.48  | 13.99 | 3.72E-01 |
| cg20197622 | -11.31 | 4.44  | 1.09E-02 | -4.46  | 10.24 | 6.63E-01 | -18.75 | 16.39 | 2.53E-01 | -12.34  | 5.56  | 2.64E-02 | -12.17 | 14.06 | 3.87E-01 |
| cg16475951 | 28.16  | 11.06 | 1.09E-02 | 22.78  | 21.93 | 2.99E-01 | 88.56  | 59.42 | 1.36E-01 | 20.62   | 15.04 | 1.70E-01 | 47.84  | 26.78 | 7.40E-02 |
| cg08785724 | -7.73  | 3.03  | 1.09E-02 | -4.04  | 4.46  | 3.65E-01 | -13.48 | 5.70  | 1.81E-02 | -4.02   | 10.32 | 6.97E-01 | -10.12 | 7.42  | 1.73E-01 |
| cg26398467 | 17.63  | 6.92  | 1.09E-02 | 9.02   | 14.34 | 5.29E-01 | -13.59 | 44.02 | 7.57E-01 | 22.09   | 9.72  | 2.30E-02 | 19.82  | 14.28 | 1.65E-01 |
| cg07039378 | -8.20  | 3.22  | 1.09E-02 | -6.93  | 4.43  | 1.18E-01 | -13.75 | 6.49  | 3.42E-02 | 3.12    | 12.55 | 8.04E-01 | -8.54  | 8.06  | 2.89E-01 |
| cg00157012 | 10.41  | 4.09  | 1.09E-02 | 9.62   | 5.67  | 9.00E-02 | 15.17  | 9.96  | 1.28E-01 | 16.32   | 11.57 | 1.58E-01 | 4.37   | 9.45  | 6.44E-01 |
| cg16388791 | -17.14 | 6.73  | 1.09E-02 | -33.76 | 19.63 | 8.55E-02 | -15.18 | 69.67 | 8.28E-01 | -15.93  | 7.56  | 3.52E-02 | -5.00  | 23.79 | 8.33E-01 |
| cg01930679 | -51.48 | 20.22 | 1.09E-02 | -32.20 | 27.86 | 2.48E-01 | -11.07 | 77.62 | 8.87E-01 | -100.88 | 44.76 | 2.42E-02 | -65.47 | 45.05 | 1.46E-01 |
| cg04275239 | -13.27 | 5.21  | 1.09E-02 | -10.54 | 11.96 | 3.78E-01 | 5.28   | 12.30 | 6.68E-01 | -19.22  | 6.46  | 2.93E-03 | -17.13 | 14.97 | 2.53E-01 |
| cg03446863 | 35.56  | 13.97 | 1.09E-02 | 34.85  | 16.61 | 3.59E-02 | 135.57 | 87.91 | 1.23E-01 | 45.47   | 44.24 | 3.04E-01 | 17.66  | 34.04 | 6.04E-01 |
| cg11891925 | -13.28 | 5.22  | 1.09E-02 | -16.55 | 7.65  | 3.04E-02 | -6.78  | 11.48 | 5.55E-01 | -7.52   | 14.58 | 6.06E-01 | -16.05 | 11.65 | 1.68E-01 |
| cg03496220 | 11.19  | 4.39  | 1.09E-02 | 5.98   | 5.14  | 2.44E-01 | 25.72  | 8.79  | 3.44E-03 | 8.35    | 9.78  | 3.93E-01 | 10.19  | 9.38  | 2.77E-01 |
| cg17064754 | -12.79 | 5.02  | 1.09E-02 | -11.12 | 6.88  | 1.06E-01 | -12.07 | 11.96 | 3.13E-01 | -21.38  | 19.25 | 2.67E-01 | -14.72 | 10.65 | 1.67E-01 |
| cg01432432 | 19.49  | 7.66  | 1.09E-02 | 24.74  | 14.33 | 8.43E-02 | -17.79 | 35.30 | 6.14E-01 | 24.55   | 10.72 | 2.20E-02 | 4.70   | 19.29 | 8.07E-01 |
| cg01142475 | -6.03  | 2.37  | 1.09E-02 | -4.74  | 4.31  | 2.71E-01 | -0.87  | 5.20  | 8.67E-01 | -10.98  | 4.53  | 1.53E-02 | -6.51  | 5.09  | 2.01E-01 |
| cg24725560 | 35.33  | 13.88 | 1.09E-02 | 46.78  | 17.28 | 6.77E-03 | 38.30  | 70.21 | 5.85E-01 | 23.35   | 33.20 | 4.82E-01 | -3.19  | 37.04 | 9.31E-01 |
| cg22682213 | -25.70 | 10.10 | 1.09E-02 | -26.02 | 26.19 | 3.21E-01 | -74.20 | 93.70 | 4.28E-01 | -24.51  | 11.57 | 3.41E-02 | -29.41 | 36.12 | 4.16E-01 |
| cg17822269 | -17.65 | 6.94  | 1.09E-02 | -20.28 | 18.29 | 2.68E-01 | -43.67 | 34.31 | 2.03E-01 | -19.03  | 8.01  | 1.75E-02 | 20.13  | 27.11 | 4.58E-01 |
| cg19124316 | -49.68 | 19.52 | 1.09E-02 | -43.97 | 19.07 | 2.11E-02 | 8.81   | 58.63 | 8.81E-01 | 7.80    | 78.38 | 9.21E-01 | -97.00 | 33.54 | 3.83E-03 |
| cg25341032 | -11.36 | 4.46  | 1.09E-02 | -21.21 | 9.68  | 2.84E-02 | -7.46  | 12.19 | 5.41E-01 | -10.01  | 5.90  | 8.97E-02 | -1.49  | 15.67 | 9.24E-01 |
| cg19026356 | 31.63  | 12.43 | 1.09E-02 | 19.35  | 25.53 | 4.48E-01 | -17.25 | 96.20 | 8.58E-01 | 32.83   | 15.39 | 3.29E-02 | 63.11  | 40.63 | 1.20E-01 |
| cg23440144 | 19.65  | 7.72  | 1.09E-02 | 30.25  | 20.20 | 1.34E-01 | 36.19  | 24.03 | 1.32E-01 | 16.85   | 9.40  | 7.29E-02 | 1.41   | 28.24 | 9.60E-01 |
| cg11784623 | 29.11  | 11.44 | 1.09E-02 | 33.89  | 17.97 | 5.92E-02 | 46.86  | 34.78 | 1.78E-01 | 29.30   | 22.70 | 1.97E-01 | 12.29  | 23.74 | 6.05E-01 |
| cg16963683 | -57.58 | 22.63 | 1.09E-02 | -84.10 | 30.59 | 5.98E-03 | -54.23 | 87.22 | 5.34E-01 | 3.42    | 62.92 | 9.57E-01 | -32.63 | 44.70 | 4.65E-01 |



|            |        |       |          |        |       |          |        |        |          |        |       |          |        |       |          |
|------------|--------|-------|----------|--------|-------|----------|--------|--------|----------|--------|-------|----------|--------|-------|----------|
| cg27473406 | -10.64 | 4.18  | 1.09E-02 | -4.97  | 6.35  | 4.33E-01 | -16.71 | 8.96   | 6.22E-02 | -5.98  | 14.20 | 6.73E-01 | -16.58 | 8.20  | 4.31E-02 |
| cg00969446 | -11.82 | 4.65  | 1.09E-02 | -15.49 | 6.39  | 1.54E-02 | 1.11   | 10.75  | 9.18E-01 | -6.94  | 15.60 | 6.56E-01 | -16.45 | 10.48 | 1.17E-01 |
| cg06051581 | -15.07 | 5.92  | 1.10E-02 | -25.57 | 14.47 | 7.72E-02 | -10.59 | 28.46  | 7.10E-01 | -13.68 | 7.03  | 5.19E-02 | -7.86  | 20.96 | 7.08E-01 |
| cg07036137 | 27.53  | 10.82 | 1.10E-02 | 48.99  | 16.89 | 3.71E-03 | 4.01   | 27.16  | 8.83E-01 | 29.39  | 29.18 | 3.14E-01 | 11.58  | 18.94 | 5.41E-01 |
| cg01150105 | -8.11  | 3.19  | 1.10E-02 | -13.26 | 6.36  | 3.71E-02 | -5.38  | 10.58  | 6.11E-01 | -4.87  | 4.35  | 2.63E-01 | -13.87 | 9.17  | 1.30E-01 |
| cg05609780 | -15.88 | 6.24  | 1.10E-02 | -34.92 | 14.40 | 1.53E-02 | 0.15   | 33.80  | 9.96E-01 | -10.41 | 7.76  | 1.80E-01 | -19.75 | 17.23 | 2.52E-01 |
| cg19477921 | -14.96 | 5.88  | 1.10E-02 | -20.36 | 11.64 | 8.01E-02 | -3.11  | 11.54  | 7.87E-01 | -12.67 | 11.72 | 2.80E-01 | -24.71 | 12.18 | 4.25E-02 |
| cg15619125 | 21.02  | 8.26  | 1.10E-02 | 6.07   | 16.27 | 7.09E-01 | 21.30  | 14.16  | 1.32E-01 | 32.42  | 16.02 | 4.30E-02 | 26.41  | 22.47 | 2.40E-01 |
| cg08645402 | 20.34  | 8.00  | 1.10E-02 | 30.31  | 14.27 | 3.37E-02 | 12.78  | 15.65  | 4.14E-01 | 16.20  | 16.28 | 3.20E-01 | 19.49  | 18.68 | 2.97E-01 |
| cg09978353 | 11.71  | 4.60  | 1.10E-02 | 5.71   | 9.04  | 5.28E-01 | 9.75   | 10.90  | 3.71E-01 | 15.50  | 6.95  | 2.57E-02 | 13.65  | 13.08 | 2.97E-01 |
| cg26614154 | 21.24  | 8.35  | 1.10E-02 | 31.79  | 17.50 | 6.93E-02 | -3.34  | 19.93  | 8.67E-01 | 22.28  | 13.22 | 9.18E-02 | 28.84  | 18.81 | 1.25E-01 |
| cg12172659 | 17.84  | 7.02  | 1.10E-02 | 37.42  | 20.01 | 6.14E-02 | 47.24  | 28.82  | 1.01E-01 | 11.12  | 8.08  | 1.69E-01 | 32.29  | 27.80 | 2.45E-01 |
| cg08961893 | 21.11  | 8.30  | 1.10E-02 | 30.95  | 15.00 | 3.91E-02 | 5.82   | 15.92  | 7.15E-01 | 17.07  | 17.74 | 3.36E-01 | 31.16  | 18.45 | 9.13E-02 |
| cg10720210 | 15.58  | 6.13  | 1.10E-02 | -2.00  | 19.19 | 9.17E-01 | 35.72  | 30.89  | 2.48E-01 | 16.12  | 6.77  | 1.72E-02 | 29.82  | 31.10 | 3.38E-01 |
| cg27203437 | 28.82  | 11.33 | 1.10E-02 | 23.76  | 33.26 | 4.75E-01 | 58.21  | 142.94 | 6.84E-01 | 30.17  | 12.60 | 1.66E-02 | 18.70  | 43.27 | 6.66E-01 |
| cg20498746 | 12.54  | 4.93  | 1.10E-02 | 10.60  | 7.12  | 1.36E-01 | 8.97   | 13.43  | 5.04E-01 | 13.21  | 21.28 | 5.35E-01 | 16.68  | 8.56  | 5.14E-02 |
| cg03270995 | -47.88 | 18.83 | 1.10E-02 | -76.90 | 30.56 | 1.19E-02 | 7.36   | 50.12  | 8.83E-01 | -52.73 | 35.61 | 1.39E-01 | -24.95 | 42.18 | 5.54E-01 |
| cg12981595 | -5.43  | 2.14  | 1.10E-02 | -5.53  | 3.57  | 1.21E-01 | 3.22   | 5.87   | 5.83E-01 | -7.13  | 3.41  | 3.62E-02 | -9.17  | 6.26  | 1.43E-01 |
| cg07300384 | -14.42 | 5.67  | 1.10E-02 | -17.97 | 16.14 | 2.66E-01 | 31.03  | 27.06  | 2.51E-01 | -16.76 | 6.10  | 5.97E-03 | -9.99  | 23.21 | 6.67E-01 |
| cg09374627 | -9.21  | 3.62  | 1.10E-02 | -17.87 | 5.54  | 1.27E-03 | -7.32  | 6.49   | 2.60E-01 | -4.81  | 6.91  | 4.87E-01 | -2.63  | 7.46  | 7.25E-01 |
| cg01023593 | -17.59 | 6.92  | 1.10E-02 | -28.33 | 9.12  | 1.90E-03 | -1.98  | 12.48  | 8.74E-01 | -25.20 | 8.74  | 3.93E-03 | -0.61  | 15.83 | 9.69E-01 |
| cg16558330 | -19.19 | 7.55  | 1.10E-02 | -40.91 | 18.91 | 3.05E-02 | -33.76 | 36.15  | 3.50E-01 | -14.43 | 8.91  | 1.05E-01 | -10.61 | 26.80 | 6.92E-01 |
| cg07343527 | 46.18  | 18.17 | 1.10E-02 | 55.42  | 37.46 | 1.39E-01 | 5.37   | 185.90 | 9.77E-01 | 57.25  | 22.67 | 1.16E-02 | -32.87 | 54.18 | 5.44E-01 |
| cg04863679 | -8.81  | 3.47  | 1.10E-02 | -9.34  | 6.22  | 1.33E-01 | -13.27 | 12.86  | 3.02E-01 | -10.77 | 5.09  | 3.43E-02 | 0.31   | 8.85  | 9.72E-01 |
| cg19436415 | 23.14  | 9.11  | 1.11E-02 | 35.62  | 12.35 | 3.91E-03 | 31.21  | 15.20  | 4.00E-02 | 17.12  | 30.83 | 5.79E-01 | -1.21  | 15.67 | 9.38E-01 |
| cg20092122 | -25.94 | 10.21 | 1.11E-02 | -30.90 | 15.16 | 4.15E-02 | -6.99  | 29.66  | 8.14E-01 | -18.62 | 27.64 | 5.01E-01 | -29.34 | 18.90 | 1.21E-01 |
| cg10096929 | 8.16   | 3.21  | 1.11E-02 | 10.49  | 4.46  | 1.88E-02 | 10.86  | 6.53   | 9.59E-02 | 6.32   | 11.38 | 5.79E-01 | -2.48  | 8.00  | 7.56E-01 |
| cg27631114 | 35.08  | 13.81 | 1.11E-02 | 33.09  | 16.67 | 4.72E-02 | 24.91  | 57.19  | 6.63E-01 | 102.15 | 60.44 | 9.10E-02 | 27.51  | 30.60 | 3.69E-01 |
| cg06699669 | -44.31 | 17.44 | 1.11E-02 | -60.25 | 23.00 | 8.81E-03 | 12.89  | 61.97  | 8.35E-01 | -10.63 | 41.66 | 7.99E-01 | -51.79 | 42.25 | 2.20E-01 |
| cg06817516 | 20.63  | 8.12  | 1.11E-02 | 36.63  | 18.56 | 4.85E-02 | 9.22   | 20.66  | 6.55E-01 | 17.93  | 13.50 | 1.84E-01 | 19.52  | 15.01 | 1.93E-01 |
| cg13433366 | 26.45  | 10.41 | 1.11E-02 | 21.84  | 13.91 | 1.16E-01 | 49.00  | 30.58  | 1.09E-01 | 39.94  | 29.48 | 1.76E-01 | 17.84  | 23.33 | 4.44E-01 |
| cg24064506 | 22.37  | 8.81  | 1.11E-02 | 18.72  | 15.26 | 2.20E-01 | 17.22  | 17.07  | 3.13E-01 | 26.34  | 18.28 | 1.50E-01 | 32.26  | 21.45 | 1.33E-01 |
| cg24437859 | -8.01  | 3.15  | 1.11E-02 | -8.23  | 3.91  | 3.54E-02 | -8.57  | 7.43   | 2.48E-01 | -2.07  | 12.43 | 8.68E-01 | -9.25  | 9.63  | 3.37E-01 |
| cg16303825 | 35.99  | 14.17 | 1.11E-02 | -10.76 | 40.80 | 7.92E-01 | -24.28 | 103.38 | 8.14E-01 | 42.05  | 15.88 | 8.10E-03 | 66.17  | 55.73 | 2.35E-01 |
| cg18577829 | 9.72   | 3.82  | 1.11E-02 | 10.37  | 7.56  | 1.70E-01 | 14.08  | 13.27  | 2.89E-01 | 9.29   | 4.89  | 5.76E-02 | 4.35   | 17.10 | 7.99E-01 |

|            |        |       |          |        |       |          |         |        |          |        |       |          |        |       |          |
|------------|--------|-------|----------|--------|-------|----------|---------|--------|----------|--------|-------|----------|--------|-------|----------|
| cg00129556 | 20.96  | 8.25  | 1.11E-02 | 24.39  | 10.68 | 2.24E-02 | 30.27   | 25.45  | 2.34E-01 | -28.27 | 39.13 | 4.70E-01 | 17.66  | 16.39 | 2.81E-01 |
| cg04132917 | -16.49 | 6.49  | 1.11E-02 | -17.16 | 19.27 | 3.73E-01 | 82.92   | 67.92  | 2.22E-01 | -16.60 | 7.30  | 2.30E-02 | -25.25 | 22.15 | 2.54E-01 |
| cg12730323 | 19.16  | 7.54  | 1.11E-02 | 31.94  | 11.65 | 6.13E-03 | 16.16   | 20.63  | 4.33E-01 | 19.53  | 19.81 | 3.24E-01 | 2.60   | 13.71 | 8.50E-01 |
| cg21322149 | -55.05 | 21.68 | 1.11E-02 | -58.41 | 27.74 | 3.52E-02 | -129.21 | 57.08  | 2.36E-02 | 11.71  | 63.51 | 8.54E-01 | -28.40 | 50.82 | 5.76E-01 |
| cg26795848 | 10.42  | 4.10  | 1.11E-02 | 5.79   | 8.40  | 4.91E-01 | 7.30    | 10.01  | 4.66E-01 | 13.58  | 6.25  | 2.98E-02 | 12.03  | 10.14 | 2.36E-01 |
| cg01217876 | 15.02  | 5.92  | 1.11E-02 | 19.47  | 8.48  | 2.17E-02 | 10.37   | 11.48  | 3.66E-01 | 22.77  | 17.29 | 1.88E-01 | 1.01   | 16.34 | 9.51E-01 |
| cg13844402 | 19.88  | 7.83  | 1.11E-02 | 31.83  | 15.49 | 3.98E-02 | 36.92   | 26.23  | 1.59E-01 | 19.96  | 12.12 | 9.96E-02 | 0.55   | 16.05 | 9.73E-01 |
| cg01642653 | 22.43  | 8.83  | 1.11E-02 | 18.18  | 12.76 | 1.54E-01 | 56.63   | 30.89  | 6.68E-02 | 54.21  | 34.22 | 1.13E-01 | 14.70  | 14.46 | 3.10E-01 |
| cg12229666 | 53.70  | 21.15 | 1.11E-02 | 67.13  | 25.69 | 8.97E-03 | -68.23  | 98.48  | 4.88E-01 | 2.41   | 57.55 | 9.67E-01 | 78.07  | 56.26 | 1.65E-01 |
| cg08751451 | -4.45  | 1.75  | 1.11E-02 | -2.88  | 2.87  | 3.16E-01 | -3.46   | 4.39   | 4.31E-01 | -3.80  | 3.06  | 2.14E-01 | -11.37 | 4.70  | 1.57E-02 |
| cg04844175 | -16.58 | 6.53  | 1.11E-02 | -19.96 | 15.43 | 1.96E-01 | -17.76  | 38.44  | 6.44E-01 | -14.07 | 7.63  | 6.52E-02 | -36.73 | 26.73 | 1.69E-01 |
| cg21961270 | 30.27  | 11.92 | 1.11E-02 | 40.26  | 18.47 | 2.93E-02 | 56.72   | 32.17  | 7.79E-02 | 20.32  | 38.99 | 6.02E-01 | 10.81  | 20.08 | 5.90E-01 |
| cg09308580 | 9.61   | 3.79  | 1.11E-02 | 11.89  | 5.02  | 1.79E-02 | 10.90   | 9.95   | 2.73E-01 | 3.50   | 9.87  | 7.23E-01 | 5.47   | 10.11 | 5.88E-01 |
| cg16072661 | 4.99   | 1.97  | 1.11E-02 | 6.49   | 2.93  | 2.68E-02 | 8.86    | 4.42   | 4.51E-02 | 0.01   | 3.74  | 9.99E-01 | 4.15   | 7.08  | 5.58E-01 |
| cg12796428 | 51.73  | 20.38 | 1.11E-02 | 96.44  | 55.29 | 8.11E-02 | -132.13 | 209.14 | 5.28E-01 | 49.67  | 23.74 | 3.65E-02 | 28.05  | 59.21 | 6.36E-01 |
| cg03340408 | 14.12  | 5.56  | 1.11E-02 | 11.68  | 7.58  | 1.23E-01 | 23.91   | 11.90  | 4.45E-02 | 8.42   | 20.03 | 6.74E-01 | 11.80  | 13.64 | 3.87E-01 |
| cg03332271 | 18.22  | 7.18  | 1.11E-02 | 20.48  | 12.64 | 1.05E-01 | 6.10    | 13.25  | 6.45E-01 | 15.92  | 15.98 | 3.19E-01 | 36.33  | 16.82 | 3.08E-02 |
| cg04651603 | 16.47  | 6.49  | 1.11E-02 | 12.44  | 9.29  | 1.81E-01 | 15.27   | 16.96  | 3.68E-01 | 41.08  | 20.87 | 4.90E-02 | 15.58  | 12.49 | 2.12E-01 |
| cg00291981 | 38.07  | 15.00 | 1.11E-02 | 71.84  | 45.04 | 1.11E-01 | 9.62    | 206.10 | 9.63E-01 | 40.74  | 16.96 | 1.63E-02 | -17.75 | 46.99 | 7.06E-01 |
| cg04102905 | -10.29 | 4.05  | 1.11E-02 | -14.80 | 7.94  | 6.24E-02 | -17.46  | 11.11  | 1.16E-01 | -4.14  | 6.02  | 4.91E-01 | -14.55 | 10.34 | 1.60E-01 |
| cg02465295 | -37.70 | 14.86 | 1.12E-02 | -8.12  | 43.41 | 8.52E-01 | 16.54   | 191.78 | 9.31E-01 | -45.46 | 16.53 | 5.96E-03 | -2.03  | 56.41 | 9.71E-01 |
| cg21321815 | 34.22  | 13.49 | 1.12E-02 | 35.82  | 19.45 | 6.55E-02 | 21.72   | 38.99  | 5.78E-01 | 20.03  | 34.52 | 5.62E-01 | 45.94  | 27.14 | 9.05E-02 |
| cg08886154 | -14.26 | 5.62  | 1.12E-02 | -20.77 | 9.19  | 2.37E-02 | -13.62  | 12.13  | 2.61E-01 | -6.16  | 12.35 | 6.18E-01 | -11.21 | 12.42 | 3.67E-01 |
| cg17673897 | 12.75  | 5.03  | 1.12E-02 | 15.83  | 7.15  | 2.69E-02 | 23.16   | 14.04  | 9.89E-02 | -0.86  | 18.40 | 9.63E-01 | 6.70   | 9.13  | 4.63E-01 |
| cg06086316 | -29.39 | 11.58 | 1.12E-02 | -25.94 | 13.84 | 6.09E-02 | -63.15  | 37.35  | 9.09E-02 | -8.30  | 52.10 | 8.73E-01 | -30.77 | 29.49 | 2.97E-01 |
| cg02495518 | -6.05  | 2.39  | 1.12E-02 | -6.68  | 3.90  | 8.69E-02 | 1.72    | 5.55   | 7.56E-01 | -8.05  | 4.56  | 7.73E-02 | -9.96  | 5.83  | 8.74E-02 |
| cg20848343 | 25.67  | 10.11 | 1.12E-02 | 18.76  | 14.34 | 1.91E-01 | 55.84   | 22.25  | 1.21E-02 | -4.13  | 30.72 | 8.93E-01 | 27.75  | 22.75 | 2.22E-01 |
| cg14200569 | 10.31  | 4.06  | 1.12E-02 | 12.68  | 9.36  | 1.76E-01 | 10.44   | 23.53  | 6.57E-01 | 9.12   | 4.99  | 6.75E-02 | 13.27  | 11.88 | 2.64E-01 |
| cg18090577 | -15.01 | 5.92  | 1.12E-02 | -21.14 | 11.03 | 5.52E-02 | -16.20  | 14.26  | 2.56E-01 | -14.13 | 8.53  | 9.77E-02 | 11.16  | 24.38 | 6.47E-01 |
| cg02493604 | 20.55  | 8.10  | 1.12E-02 | 24.69  | 10.85 | 2.29E-02 | 4.24    | 22.63  | 8.51E-01 | 27.93  | 26.86 | 2.98E-01 | 16.57  | 17.09 | 3.32E-01 |
| cg12126901 | -42.50 | 16.75 | 1.12E-02 | -26.43 | 21.06 | 2.10E-01 | -44.58  | 80.10  | 5.78E-01 | 1.74   | 85.67 | 9.84E-01 | -83.65 | 31.33 | 7.58E-03 |
| cg01591881 | 17.48  | 6.89  | 1.12E-02 | 7.22   | 7.84  | 3.57E-01 | 31.31   | 13.40  | 1.94E-02 | 31.27  | 13.89 | 2.44E-02 | 9.93   | 16.56 | 5.49E-01 |
| cg22077197 | 7.47   | 2.94  | 1.12E-02 | 4.16   | 4.31  | 3.35E-01 | 11.26   | 5.55   | 4.24E-02 | 11.78  | 10.45 | 2.60E-01 | 8.22   | 7.06  | 2.44E-01 |
| cg02523640 | 12.47  | 4.92  | 1.12E-02 | 14.96  | 12.29 | 2.23E-01 | 16.82   | 14.94  | 2.60E-01 | 13.96  | 6.83  | 4.10E-02 | 4.81   | 10.63 | 6.51E-01 |
| cg26290716 | 8.34   | 3.29  | 1.12E-02 | 7.20   | 4.17  | 8.40E-02 | 13.94   | 7.94   | 7.91E-02 | 10.14  | 9.84  | 3.03E-01 | 3.57   | 10.61 | 7.37E-01 |

|            |        |       |          |        |       |          |         |        |          |        |       |          |        |       |          |
|------------|--------|-------|----------|--------|-------|----------|---------|--------|----------|--------|-------|----------|--------|-------|----------|
| cg00218447 | 35.87  | 14.14 | 1.12E-02 | 38.59  | 21.13 | 6.78E-02 | 39.31   | 73.92  | 5.95E-01 | 25.07  | 46.33 | 5.88E-01 | 35.07  | 21.75 | 1.07E-01 |
| cg21468929 | 13.33  | 5.25  | 1.12E-02 | 15.17  | 7.13  | 3.32E-02 | 27.53   | 17.17  | 1.09E-01 | 8.43   | 19.83 | 6.71E-01 | 6.53   | 9.71  | 5.01E-01 |
| cg20895785 | 18.00  | 7.10  | 1.12E-02 | 25.63  | 14.47 | 7.65E-02 | 7.23    | 29.94  | 8.09E-01 | 15.94  | 9.41  | 9.02E-02 | 17.59  | 19.35 | 3.63E-01 |
| cg23849826 | 5.52   | 2.18  | 1.12E-02 | 4.36   | 3.77  | 2.47E-01 | 1.84    | 4.35   | 6.73E-01 | 8.78   | 4.11  | 3.29E-02 | 8.38   | 5.86  | 1.53E-01 |
| cg07952877 | 28.70  | 11.31 | 1.12E-02 | 56.72  | 19.89 | 4.35E-03 | 17.96   | 20.44  | 3.79E-01 | 13.38  | 8.85  | 1.30E-01 | 48.76  | 25.32 | 5.41E-02 |
| cg12919119 | 13.07  | 5.15  | 1.12E-02 | 12.48  | 6.76  | 6.49E-02 | 24.60   | 13.28  | 6.40E-02 | 19.30  | 16.24 | 2.35E-01 | 1.08   | 12.54 | 9.31E-01 |
| cg18651821 | 31.35  | 12.36 | 1.12E-02 | 22.11  | 15.74 | 1.60E-01 | 34.95   | 35.93  | 3.31E-01 | 70.94  | 40.24 | 7.79E-02 | 40.31  | 29.87 | 1.77E-01 |
| cg19514721 | 10.92  | 4.30  | 1.12E-02 | 8.50   | 6.11  | 1.64E-01 | 14.45   | 10.41  | 1.65E-01 | 10.36  | 10.90 | 3.42E-01 | 14.78  | 10.24 | 1.49E-01 |
| cg10064491 | -15.40 | 6.07  | 1.12E-02 | -9.89  | 11.46 | 3.88E-01 | -20.62  | 25.81  | 4.24E-01 | -21.78 | 7.99  | 6.41E-03 | 12.52  | 20.59 | 5.43E-01 |
| cg22573731 | -10.14 | 4.00  | 1.12E-02 | -16.47 | 7.45  | 2.72E-02 | -13.81  | 10.06  | 1.70E-01 | -3.24  | 4.89  | 5.08E-01 | -18.70 | 10.25 | 6.80E-02 |
| cg13894719 | -12.02 | 4.74  | 1.12E-02 | -23.26 | 9.68  | 1.63E-02 | -5.92   | 21.45  | 7.83E-01 | -6.12  | 6.02  | 3.09E-01 | -23.58 | 14.59 | 1.06E-01 |
| cg11598054 | -13.16 | 5.19  | 1.12E-02 | -19.60 | 7.94  | 1.35E-02 | -0.06   | 11.29  | 9.96E-01 | -23.91 | 13.44 | 7.53E-02 | -6.34  | 10.84 | 5.58E-01 |
| cg11816229 | 18.92  | 7.46  | 1.12E-02 | 10.24  | 15.54 | 5.10E-01 | 25.36   | 18.77  | 1.77E-01 | 18.34  | 10.24 | 7.33E-02 | 34.92  | 26.23 | 1.83E-01 |
| cg12743419 | -15.17 | 5.98  | 1.12E-02 | -16.63 | 11.45 | 1.46E-01 | -15.17  | 11.96  | 2.05E-01 | -10.67 | 10.63 | 3.15E-01 | -21.52 | 14.92 | 1.49E-01 |
| cg21834463 | 6.90   | 2.72  | 1.12E-02 | 4.88   | 3.57  | 1.71E-01 | 14.10   | 7.32   | 5.40E-02 | 10.52  | 7.34  | 1.52E-01 | 4.68   | 7.19  | 5.15E-01 |
| cg03770912 | 31.21  | 12.31 | 1.12E-02 | 95.55  | 43.80 | 2.91E-02 | -66.82  | 186.21 | 7.20E-01 | 25.51  | 13.82 | 6.50E-02 | 30.17  | 34.94 | 3.88E-01 |
| cg02317785 | -19.37 | 7.64  | 1.12E-02 | -1.31  | 29.10 | 9.64E-01 | -109.29 | 102.35 | 2.86E-01 | -20.55 | 8.16  | 1.18E-02 | -13.42 | 34.61 | 6.98E-01 |
| cg17580045 | 26.38  | 10.40 | 1.12E-02 | 15.67  | 13.28 | 2.38E-01 | 27.71   | 44.75  | 5.36E-01 | 16.09  | 46.69 | 7.30E-01 | 51.17  | 19.56 | 8.91E-03 |
| cg23547181 | 23.39  | 9.23  | 1.12E-02 | 4.61   | 18.27 | 8.01E-01 | 38.97   | 19.51  | 4.58E-02 | 24.09  | 14.32 | 9.26E-02 | 32.91  | 28.26 | 2.44E-01 |
| cg02160684 | 5.21   | 2.06  | 1.12E-02 | 4.75   | 2.85  | 9.61E-02 | 2.12    | 4.88   | 6.65E-01 | 7.19   | 4.42  | 1.03E-01 | 9.29   | 6.94  | 1.80E-01 |
| cg02918054 | 18.28  | 7.21  | 1.12E-02 | 39.98  | 15.58 | 1.03E-02 | 9.37    | 16.54  | 5.71E-01 | 17.33  | 13.63 | 2.03E-01 | 9.77   | 12.83 | 4.47E-01 |
| cg20622311 | -43.14 | 17.01 | 1.12E-02 | -36.61 | 22.07 | 9.72E-02 | -63.78  | 48.96  | 1.93E-01 | 10.85  | 45.20 | 8.10E-01 | -88.56 | 38.49 | 2.14E-02 |
| cg03215160 | -10.25 | 4.04  | 1.12E-02 | -11.32 | 8.62  | 1.89E-01 | -19.97  | 19.57  | 3.08E-01 | -9.24  | 5.16  | 7.35E-02 | -10.06 | 11.52 | 3.83E-01 |
| cg27534828 | 15.69  | 6.19  | 1.12E-02 | 16.06  | 9.50  | 9.07E-02 | 20.90   | 14.78  | 1.57E-01 | 2.86   | 14.63 | 8.45E-01 | 21.25  | 13.17 | 1.07E-01 |
| cg16289848 | -10.36 | 4.09  | 1.12E-02 | -18.93 | 11.19 | 9.08E-02 | -18.28  | 27.98  | 5.14E-01 | -9.03  | 4.72  | 5.56E-02 | -7.10  | 13.29 | 5.93E-01 |
| cg05657709 | 9.01   | 3.56  | 1.12E-02 | 5.31   | 4.74  | 2.62E-01 | 17.03   | 8.38   | 4.23E-02 | 4.45   | 10.89 | 6.83E-01 | 16.45  | 9.14  | 7.19E-02 |
| cg08798184 | -39.44 | 15.56 | 1.12E-02 | 2.26   | 44.94 | 9.60E-01 | -127.55 | 228.14 | 5.76E-01 | -43.15 | 17.40 | 1.31E-02 | -60.85 | 56.51 | 2.82E-01 |
| cg19755069 | -39.32 | 15.51 | 1.12E-02 | -14.14 | 15.22 | 3.53E-01 | -10.84  | 34.83  | 7.56E-01 | -71.07 | 22.77 | 1.80E-03 | -57.32 | 20.04 | 4.23E-03 |
| cg16653173 | 41.20  | 16.25 | 1.12E-02 | 88.23  | 44.48 | 4.73E-02 | 26.04   | 94.82  | 7.84E-01 | 35.53  | 18.73 | 5.79E-02 | 22.69  | 55.87 | 6.85E-01 |
| cg21135682 | 30.49  | 12.03 | 1.12E-02 | 34.31  | 34.24 | 3.16E-01 | 13.53   | 133.33 | 9.19E-01 | 34.72  | 13.50 | 1.01E-02 | -19.14 | 44.08 | 6.64E-01 |
| cg20884780 | 19.21  | 7.58  | 1.12E-02 | 19.09  | 22.57 | 3.97E-01 | 9.50    | 39.92  | 8.12E-01 | 17.59  | 8.59  | 4.07E-02 | 41.38  | 27.99 | 1.39E-01 |
| cg15996406 | 16.79  | 6.62  | 1.12E-02 | 23.17  | 12.37 | 6.10E-02 | -15.08  | 19.11  | 4.30E-01 | 21.46  | 6.82  | 1.66E-03 | 10.48  | 20.68 | 6.12E-01 |
| cg05759948 | -14.63 | 5.77  | 1.12E-02 | -21.99 | 8.70  | 1.15E-02 | -7.86   | 13.10  | 5.48E-01 | -14.05 | 13.97 | 3.15E-01 | -5.28  | 13.05 | 6.86E-01 |
| cg20522398 | -15.05 | 5.94  | 1.13E-02 | -14.63 | 13.45 | 2.77E-01 | -19.50  | 29.18  | 5.04E-01 | -13.19 | 7.27  | 6.96E-02 | -26.89 | 19.14 | 1.60E-01 |
| cg24318598 | 16.73  | 6.60  | 1.13E-02 | 20.82  | 17.87 | 2.44E-01 | 21.59   | 29.44  | 4.63E-01 | 14.23  | 7.62  | 6.18E-02 | 33.82  | 26.33 | 1.99E-01 |

|            |        |       |          |        |       |          |         |        |          |        |        |          |        |       |          |
|------------|--------|-------|----------|--------|-------|----------|---------|--------|----------|--------|--------|----------|--------|-------|----------|
| cg15596932 | -54.61 | 21.54 | 1.13E-02 | -79.45 | 23.69 | 7.97E-04 | 43.08   | 64.16  | 5.02E-01 | -84.91 | 37.03  | 2.19E-02 | -30.24 | 31.11 | 3.31E-01 |
| cg23530330 | -18.85 | 7.44  | 1.13E-02 | -7.04  | 17.88 | 6.94E-01 | -41.02  | 22.88  | 7.30E-02 | -18.33 | 9.60   | 5.61E-02 | -18.94 | 21.40 | 3.76E-01 |
| cg01717524 | -13.36 | 5.27  | 1.13E-02 | -17.71 | 7.69  | 2.14E-02 | -3.31   | 13.42  | 8.05E-01 | -12.74 | 15.43  | 4.09E-01 | -11.76 | 10.35 | 2.56E-01 |
| cg10078511 | 6.37   | 2.51  | 1.13E-02 | 5.92   | 3.60  | 1.00E-01 | 3.79    | 4.87   | 4.36E-01 | 8.83   | 9.06   | 3.30E-01 | 10.58  | 6.10  | 8.29E-02 |
| cg10938788 | -10.50 | 4.14  | 1.13E-02 | -11.29 | 8.55  | 1.86E-01 | -1.38   | 7.80   | 8.60E-01 | -16.51 | 6.88   | 1.64E-02 | -12.18 | 11.94 | 3.08E-01 |
| cg09046427 | 11.30  | 4.46  | 1.13E-02 | 17.27  | 7.67  | 2.44E-02 | 3.99    | 9.60   | 6.78E-01 | 2.19   | 9.08   | 8.09E-01 | 19.90  | 9.86  | 4.35E-02 |
| cg02086790 | 13.60  | 5.37  | 1.13E-02 | 14.09  | 7.49  | 6.00E-02 | 12.23   | 16.10  | 4.48E-01 | 10.53  | 18.67  | 5.73E-01 | 14.12  | 9.91  | 1.54E-01 |
| cg01043250 | -11.01 | 4.34  | 1.13E-02 | -11.26 | 8.85  | 2.03E-01 | 3.02    | 12.00  | 8.01E-01 | -13.22 | 5.89   | 2.49E-02 | -17.82 | 14.93 | 2.33E-01 |
| cg24478733 | -11.60 | 4.58  | 1.13E-02 | -14.25 | 8.87  | 1.08E-01 | 3.63    | 10.91  | 7.39E-01 | -11.68 | 7.23   | 1.06E-01 | -22.53 | 10.84 | 3.76E-02 |
| cg06718003 | -6.82  | 2.69  | 1.13E-02 | -4.64  | 4.64  | 3.17E-01 | -11.56  | 8.51   | 1.74E-01 | -10.46 | 4.54   | 2.11E-02 | -1.97  | 5.87  | 7.38E-01 |
| cg23813681 | -6.63  | 2.62  | 1.13E-02 | -7.99  | 4.66  | 8.63E-02 | -4.04   | 6.08   | 5.07E-01 | -10.28 | 4.53   | 2.32E-02 | 0.44   | 6.45  | 9.45E-01 |
| cg18147147 | 13.52  | 5.34  | 1.13E-02 | 17.86  | 7.83  | 2.26E-02 | 12.03   | 15.63  | 4.41E-01 | 9.53   | 11.35  | 4.01E-01 | 8.68   | 11.98 | 4.69E-01 |
| cg27427051 | 30.05  | 11.86 | 1.13E-02 | 36.23  | 34.15 | 2.89E-01 | 96.40   | 141.22 | 4.95E-01 | 32.81  | 13.23  | 1.31E-02 | -20.05 | 45.32 | 6.58E-01 |
| cg01550445 | 8.54   | 3.37  | 1.13E-02 | 6.59   | 4.44  | 1.37E-01 | 15.83   | 7.72   | 4.04E-02 | 2.57   | 10.69  | 8.10E-01 | 11.02  | 9.25  | 2.34E-01 |
| cg19410046 | -13.15 | 5.19  | 1.13E-02 | -19.64 | 11.90 | 9.90E-02 | -4.90   | 16.52  | 7.67E-01 | -10.33 | 6.82   | 1.30E-01 | -22.51 | 14.37 | 1.17E-01 |
| cg11957400 | 6.29   | 2.49  | 1.13E-02 | 7.50   | 3.78  | 4.74E-02 | 7.27    | 4.63   | 1.17E-01 | 8.73   | 6.20   | 1.60E-01 | -3.62  | 7.17  | 6.13E-01 |
| cg17440939 | 43.05  | 17.00 | 1.13E-02 | 45.65  | 20.58 | 2.66E-02 | 71.32   | 71.76  | 3.20E-01 | -25.88 | 114.29 | 8.21E-01 | 35.38  | 34.70 | 3.08E-01 |
| cg27642416 | -9.26  | 3.66  | 1.13E-02 | -9.33  | 7.66  | 2.23E-01 | -6.39   | 12.36  | 6.05E-01 | -8.21  | 4.99   | 9.97E-02 | -14.67 | 9.52  | 1.23E-01 |
| cg07570498 | 13.27  | 5.24  | 1.13E-02 | 16.98  | 10.20 | 9.60E-02 | 9.87    | 12.36  | 4.25E-01 | 15.12  | 7.73   | 5.05E-02 | 0.75   | 16.78 | 9.64E-01 |
| cg26401512 | -29.35 | 11.59 | 1.13E-02 | -16.68 | 20.30 | 4.11E-01 | 7.34    | 51.42  | 8.86E-01 | -46.71 | 16.43  | 4.48E-03 | -8.37  | 32.64 | 7.98E-01 |
| cg25981875 | 24.58  | 9.71  | 1.13E-02 | 42.23  | 15.99 | 8.26E-03 | 4.44    | 19.74  | 8.22E-01 | 14.16  | 20.30  | 4.85E-01 | 29.22  | 24.20 | 2.27E-01 |
| cg20912169 | 23.31  | 9.21  | 1.13E-02 | 48.02  | 31.71 | 1.30E-01 | -128.40 | 107.18 | 2.31E-01 | 22.47  | 10.05  | 2.53E-02 | 19.51  | 35.07 | 5.78E-01 |
| cg18456459 | 12.64  | 4.99  | 1.13E-02 | 10.37  | 6.76  | 1.25E-01 | 15.39   | 11.50  | 1.81E-01 | 29.49  | 22.80  | 1.96E-01 | 12.22  | 10.66 | 2.51E-01 |
| cg06215569 | 30.29  | 11.96 | 1.13E-02 | 24.17  | 15.94 | 1.29E-01 | 23.58   | 62.68  | 7.07E-01 | 29.56  | 40.86  | 4.69E-01 | 42.26  | 21.35 | 4.77E-02 |
| cg14302214 | -16.86 | 6.66  | 1.13E-02 | -20.60 | 9.56  | 3.12E-02 | -10.63  | 16.57  | 5.21E-01 | -17.23 | 21.78  | 4.29E-01 | -13.60 | 13.06 | 2.98E-01 |
| cg25009141 | 12.19  | 4.81  | 1.14E-02 | 11.21  | 6.63  | 9.06E-02 | 20.69   | 11.21  | 6.49E-02 | 20.95  | 13.31  | 1.15E-01 | -1.86  | 12.17 | 8.79E-01 |
| cg25692621 | -14.93 | 5.90  | 1.14E-02 | 2.82   | 15.15 | 8.52E-01 | -7.70   | 27.97  | 7.83E-01 | -19.47 | 6.92   | 4.88E-03 | -11.17 | 21.24 | 5.99E-01 |
| cg15560801 | -15.17 | 5.99  | 1.14E-02 | -21.43 | 8.14  | 8.48E-03 | -4.96   | 12.58  | 6.94E-01 | -31.70 | 16.88  | 6.05E-02 | -2.29  | 12.59 | 8.56E-01 |
| cg01512084 | 17.57  | 6.94  | 1.14E-02 | 12.31  | 15.61 | 4.31E-01 | 11.64   | 18.44  | 5.28E-01 | 21.34  | 9.21   | 2.05E-02 | 14.79  | 22.72 | 5.15E-01 |
| cg27559224 | -10.30 | 4.07  | 1.14E-02 | -16.43 | 8.45  | 5.18E-02 | 4.02    | 9.76   | 6.80E-01 | -11.23 | 6.00   | 6.13E-02 | -14.94 | 11.03 | 1.76E-01 |
| cg21607076 | 15.16  | 5.99  | 1.14E-02 | 16.56  | 14.65 | 2.58E-01 | 29.35   | 56.54  | 6.04E-01 | 14.36  | 6.88   | 3.69E-02 | 18.43  | 23.54 | 4.34E-01 |
| cg22175873 | 9.09   | 3.59  | 1.14E-02 | 7.14   | 5.56  | 1.99E-01 | 13.05   | 8.92   | 1.43E-01 | 20.16  | 9.28   | 2.98E-02 | 3.60   | 6.89  | 6.01E-01 |
| cg19018709 | 15.06  | 5.95  | 1.14E-02 | 18.57  | 8.24  | 2.42E-02 | 21.35   | 13.07  | 1.02E-01 | 15.14  | 18.39  | 4.10E-01 | -3.75  | 14.57 | 7.97E-01 |
| cg26197530 | -17.29 | 6.83  | 1.14E-02 | -3.86  | 13.28 | 7.71E-01 | -27.40  | 26.12  | 2.94E-01 | -21.41 | 9.38   | 2.25E-02 | -22.19 | 18.42 | 2.28E-01 |
| cg12713445 | 15.32  | 6.05  | 1.14E-02 | 20.74  | 12.35 | 9.33E-02 | -3.52   | 13.82  | 7.99E-01 | 17.06  | 8.67   | 4.92E-02 | 33.64  | 21.33 | 1.15E-01 |

|            |        |       |          |        |       |          |         |        |          |         |        |          |         |       |          |
|------------|--------|-------|----------|--------|-------|----------|---------|--------|----------|---------|--------|----------|---------|-------|----------|
| cg05581297 | -12.68 | 5.01  | 1.14E-02 | -11.38 | 12.29 | 3.54E-01 | -12.81  | 12.22  | 2.95E-01 | -10.83  | 6.55   | 9.83E-02 | -28.36  | 17.56 | 1.06E-01 |
| cg12632264 | 21.28  | 8.41  | 1.14E-02 | 41.19  | 15.99 | 1.00E-02 | 15.41   | 16.13  | 3.39E-01 | 17.51   | 15.22  | 2.50E-01 | 2.53    | 21.91 | 9.08E-01 |
| cg26392367 | -12.05 | 4.76  | 1.14E-02 | -8.76  | 6.65  | 1.88E-01 | -6.36   | 12.00  | 5.96E-01 | -24.95  | 13.61  | 6.68E-02 | -16.89  | 10.44 | 1.06E-01 |
| cg27547442 | -21.25 | 8.39  | 1.14E-02 | -63.67 | 28.54 | 2.57E-02 | -34.68  | 107.41 | 7.47E-01 | -18.32  | 9.06   | 4.31E-02 | 4.45    | 38.27 | 9.07E-01 |
| cg06146977 | 19.72  | 7.79  | 1.14E-02 | 23.86  | 15.80 | 1.31E-01 | 43.41   | 30.84  | 1.59E-01 | 11.11   | 10.21  | 2.77E-01 | 42.31   | 23.43 | 7.10E-02 |
| cg08460635 | 44.70  | 17.66 | 1.14E-02 | 53.25  | 25.90 | 3.97E-02 | 41.65   | 40.96  | 3.09E-01 | 83.93   | 57.04  | 1.41E-01 | 16.35   | 35.11 | 6.41E-01 |
| cg16113298 | 15.63  | 6.17  | 1.14E-02 | -7.98  | 21.62 | 7.12E-01 | 135.85  | 107.92 | 2.08E-01 | 16.60   | 6.73   | 1.36E-02 | 25.39   | 22.91 | 2.68E-01 |
| cg07906632 | 20.07  | 7.93  | 1.14E-02 | 18.31  | 9.94  | 6.55E-02 | 15.85   | 26.49  | 5.50E-01 | 38.23   | 27.65  | 1.67E-01 | 20.10   | 18.12 | 2.67E-01 |
| cg01151699 | 41.04  | 16.22 | 1.14E-02 | 40.58  | 19.83 | 4.07E-02 | 71.87   | 91.71  | 4.33E-01 | 82.29   | 75.06  | 2.73E-01 | 30.84   | 32.23 | 3.39E-01 |
| cg15256491 | -14.25 | 5.63  | 1.14E-02 | -12.33 | 8.21  | 1.33E-01 | -9.10   | 14.62  | 5.34E-01 | -17.93  | 15.06  | 2.34E-01 | -19.05  | 11.47 | 9.67E-02 |
| cg01285652 | -18.63 | 7.36  | 1.14E-02 | -31.06 | 14.33 | 3.02E-02 | -7.14   | 14.73  | 6.28E-01 | -14.32  | 14.57  | 3.26E-01 | -21.61  | 15.31 | 1.58E-01 |
| cg08862366 | -9.33  | 3.69  | 1.14E-02 | -11.53 | 6.98  | 9.84E-02 | -4.08   | 9.76   | 6.76E-01 | -9.23   | 5.82   | 1.13E-01 | -10.33  | 8.77  | 2.39E-01 |
| cg11644817 | 41.67  | 16.47 | 1.14E-02 | 35.32  | 20.44 | 8.40E-02 | 84.53   | 49.25  | 8.61E-02 | 10.51   | 56.95  | 8.54E-01 | 54.16   | 41.78 | 1.95E-01 |
| cg03835709 | -13.79 | 5.45  | 1.14E-02 | -14.20 | 10.89 | 1.92E-01 | -6.92   | 20.21  | 7.32E-01 | -12.57  | 7.20   | 8.07E-02 | -24.41  | 16.95 | 1.50E-01 |
| cg27405732 | -8.70  | 3.44  | 1.14E-02 | -6.41  | 4.91  | 1.92E-01 | -10.94  | 7.07   | 1.22E-01 | -21.32  | 10.35  | 3.94E-02 | -3.79   | 8.55  | 6.58E-01 |
| cg13947137 | 19.17  | 7.58  | 1.14E-02 | 24.75  | 11.92 | 3.79E-02 | 6.32    | 17.00  | 7.10E-01 | 11.34   | 20.38  | 5.78E-01 | 24.50   | 14.88 | 9.97E-02 |
| cg04664328 | -14.72 | 5.82  | 1.14E-02 | -29.66 | 9.97  | 2.94E-03 | -2.25   | 14.13  | 8.74E-01 | -9.97   | 7.32   | 1.73E-01 | -13.48  | 18.51 | 4.66E-01 |
| cg12459932 | -9.19  | 3.63  | 1.14E-02 | -10.95 | 4.88  | 2.49E-02 | -12.26  | 9.34   | 1.89E-01 | 3.90    | 11.15  | 7.26E-01 | -8.95   | 8.38  | 2.85E-01 |
| cg16209310 | -12.88 | 5.09  | 1.14E-02 | -13.48 | 14.71 | 3.60E-01 | -25.57  | 23.18  | 2.70E-01 | -12.98  | 5.93   | 2.85E-02 | -4.81   | 16.57 | 7.71E-01 |
| cg25829961 | -25.96 | 10.26 | 1.14E-02 | -21.34 | 14.58 | 1.43E-01 | -20.89  | 21.28  | 3.26E-01 | -44.43  | 32.21  | 1.68E-01 | -35.34  | 24.85 | 1.55E-01 |
| cg01138972 | -30.06 | 11.88 | 1.14E-02 | -31.24 | 20.51 | 1.28E-01 | -153.45 | 97.07  | 1.14E-01 | 36.55   | 51.98  | 4.82E-01 | -31.96  | 12.33 | 9.57E-03 |
| cg14647190 | -14.40 | 5.69  | 1.14E-02 | -21.05 | 18.00 | 2.42E-01 | -0.48   | 30.03  | 9.87E-01 | -13.12  | 6.30   | 3.74E-02 | -32.91  | 26.04 | 2.06E-01 |
| cg21162003 | 19.49  | 7.70  | 1.14E-02 | 35.81  | 11.06 | 1.21E-03 | 5.54    | 14.81  | 7.08E-01 | 12.59   | 14.84  | 3.96E-01 | 10.80   | 18.88 | 5.67E-01 |
| cg10338518 | 5.90   | 2.33  | 1.14E-02 | 6.44   | 3.13  | 3.94E-02 | 7.58    | 6.33   | 2.31E-01 | 9.97    | 5.77   | 8.41E-02 | -2.35   | 6.13  | 7.01E-01 |
| cg14952312 | 6.84   | 2.70  | 1.14E-02 | 10.29  | 4.04  | 1.09E-02 | 6.09    | 6.55   | 3.53E-01 | 5.65    | 6.69   | 3.99E-01 | 1.28    | 5.76  | 8.25E-01 |
| cg10498524 | 27.02  | 10.68 | 1.14E-02 | 33.73  | 29.97 | 2.60E-01 | 85.67   | 118.23 | 4.69E-01 | 28.45   | 12.24  | 2.01E-02 | 3.40    | 33.35 | 9.19E-01 |
| cg08581018 | -14.36 | 5.68  | 1.14E-02 | -14.23 | 7.64  | 6.23E-02 | 4.36    | 13.90  | 7.54E-01 | -31.56  | 15.34  | 3.97E-02 | -17.99  | 11.90 | 1.31E-01 |
| cg00201457 | -12.18 | 4.82  | 1.14E-02 | -19.10 | 7.48  | 1.07E-02 | -13.81  | 11.66  | 2.36E-01 | -1.40   | 10.79  | 8.97E-01 | -7.58   | 10.37 | 4.64E-01 |
| cg23531468 | -14.60 | 5.77  | 1.14E-02 | -16.52 | 11.89 | 1.65E-01 | -4.27   | 13.17  | 7.46E-01 | -15.95  | 9.30   | 8.63E-02 | -20.01  | 13.36 | 1.34E-01 |
| cg15597136 | 108.15 | 42.76 | 1.14E-02 | 147.80 | 62.33 | 1.77E-02 | 132.70  | 127.42 | 2.98E-01 | 36.30   | 122.12 | 7.66E-01 | 65.27   | 78.86 | 4.08E-01 |
| cg16618417 | -74.85 | 29.60 | 1.14E-02 | -53.53 | 27.79 | 5.41E-02 | 90.33   | 116.89 | 4.40E-01 | -138.12 | 63.69  | 3.01E-02 | -110.45 | 47.89 | 2.11E-02 |
| cg24686918 | -9.56  | 3.78  | 1.14E-02 | -13.57 | 7.60  | 7.43E-02 | -15.10  | 11.72  | 1.98E-01 | -7.08   | 5.26   | 1.79E-01 | -7.39   | 10.37 | 4.76E-01 |
| cg16370556 | 16.01  | 6.33  | 1.15E-02 | 13.92  | 8.75  | 1.11E-01 | 21.05   | 15.87  | 1.85E-01 | 40.96   | 30.75  | 1.83E-01 | 13.21   | 12.08 | 2.74E-01 |
| cg11287531 | 26.63  | 10.53 | 1.15E-02 | 9.66   | 25.24 | 7.02E-01 | -15.63  | 95.08  | 8.69E-01 | 31.31   | 12.24  | 1.06E-02 | 26.85   | 38.84 | 4.89E-01 |
| cg16260977 | -40.46 | 16.00 | 1.15E-02 | -45.48 | 25.09 | 6.99E-02 | -49.25  | 59.45  | 4.07E-01 | -21.69  | 28.11  | 4.40E-01 | -57.75  | 36.07 | 1.09E-01 |

|            |        |       |          |        |       |          |        |        |          |        |       |          |        |       |          |
|------------|--------|-------|----------|--------|-------|----------|--------|--------|----------|--------|-------|----------|--------|-------|----------|
| cg15442737 | 9.80   | 3.88  | 1.15E-02 | 13.98  | 5.81  | 1.62E-02 | 9.17   | 8.92   | 3.04E-01 | 10.74  | 9.51  | 2.59E-01 | 0.33   | 8.67  | 9.70E-01 |
| cg23847017 | 9.02   | 3.57  | 1.15E-02 | 7.71   | 4.84  | 1.11E-01 | 13.33  | 8.19   | 1.04E-01 | 15.22  | 12.47 | 2.22E-01 | 5.71   | 8.27  | 4.90E-01 |
| cg07566700 | 12.06  | 4.77  | 1.15E-02 | 10.49  | 6.45  | 1.04E-01 | 12.66  | 11.51  | 2.72E-01 | 14.37  | 14.69 | 3.28E-01 | 15.02  | 11.40 | 1.87E-01 |
| cg17396404 | 18.71  | 7.40  | 1.15E-02 | 10.30  | 10.14 | 3.10E-01 | 25.75  | 16.25  | 1.13E-01 | 34.37  | 27.65 | 2.14E-01 | 28.75  | 17.04 | 9.16E-02 |
| cg18030409 | 22.19  | 8.78  | 1.15E-02 | 25.01  | 12.11 | 3.89E-02 | 31.86  | 19.60  | 1.04E-01 | 28.83  | 44.28 | 5.15E-01 | 6.49   | 18.13 | 7.20E-01 |
| cg02395441 | -32.76 | 12.96 | 1.15E-02 | -78.03 | 44.68 | 8.07E-02 | -15.79 | 170.06 | 9.26E-01 | -26.74 | 13.97 | 5.55E-02 | -62.53 | 58.37 | 2.84E-01 |
| cg01146232 | 15.79  | 6.25  | 1.15E-02 | 14.92  | 8.99  | 9.71E-02 | 11.77  | 16.42  | 4.74E-01 | 22.29  | 22.75 | 3.27E-01 | 17.51  | 11.46 | 1.26E-01 |
| cg27591502 | 5.89   | 2.33  | 1.15E-02 | 5.00   | 3.33  | 1.34E-01 | 8.53   | 6.57   | 1.94E-01 | 10.49  | 4.64  | 2.39E-02 | -1.93  | 6.33  | 7.60E-01 |
| cg06963709 | 5.02   | 1.99  | 1.15E-02 | 6.58   | 2.75  | 1.67E-02 | 7.80   | 4.44   | 7.89E-02 | 2.29   | 5.66  | 6.85E-01 | -1.72  | 5.07  | 7.35E-01 |
| cg25433648 | 24.35  | 9.63  | 1.15E-02 | 38.61  | 18.14 | 3.33E-02 | 33.07  | 17.82  | 6.34E-02 | 9.05   | 17.88 | 6.13E-01 | 8.63   | 26.21 | 7.42E-01 |
| cg14480507 | 13.64  | 5.40  | 1.15E-02 | 14.97  | 7.70  | 5.19E-02 | 8.65   | 12.16  | 4.77E-01 | 26.86  | 18.02 | 1.36E-01 | 9.79   | 11.46 | 3.93E-01 |
| cg24175899 | 29.36  | 11.62 | 1.15E-02 | 33.20  | 14.16 | 1.91E-02 | 15.04  | 31.09  | 6.28E-01 | 83.87  | 73.00 | 2.51E-01 | 17.28  | 28.83 | 5.49E-01 |
| cg04947907 | 9.90   | 3.92  | 1.15E-02 | 11.89  | 5.63  | 3.47E-02 | 9.58   | 10.19  | 3.47E-01 | 12.85  | 12.64 | 3.09E-01 | 5.48   | 7.50  | 4.65E-01 |
| cg06927337 | 17.01  | 6.73  | 1.15E-02 | 25.75  | 12.70 | 4.27E-02 | 8.32   | 14.01  | 5.53E-01 | 19.99  | 11.02 | 6.98E-02 | 3.52   | 19.83 | 8.59E-01 |
| cg02227879 | 5.63   | 2.23  | 1.15E-02 | 5.94   | 2.91  | 4.11E-02 | 9.59   | 5.01   | 5.57E-02 | 2.71   | 6.37  | 6.71E-01 | -0.88  | 7.29  | 9.04E-01 |
| cg05168491 | 18.31  | 7.25  | 1.15E-02 | 29.09  | 11.45 | 1.11E-02 | 19.00  | 17.07  | 2.65E-01 | 21.22  | 21.26 | 3.18E-01 | 2.55   | 13.17 | 8.47E-01 |
| cg02978184 | -15.42 | 6.10  | 1.15E-02 | 17.79  | 28.32 | 5.30E-01 | -16.56 | 72.01  | 8.18E-01 | -17.93 | 6.55  | 6.20E-03 | -7.23  | 21.84 | 7.40E-01 |
| cg04125586 | -36.50 | 14.44 | 1.15E-02 | -46.18 | 21.59 | 3.25E-02 | -16.55 | 46.25  | 7.20E-01 | -44.32 | 30.73 | 1.49E-01 | -18.93 | 29.85 | 5.26E-01 |
| cg17063452 | 12.09  | 4.78  | 1.15E-02 | 19.12  | 11.17 | 8.69E-02 | 33.43  | 17.53  | 5.65E-02 | 9.41   | 5.85  | 1.08E-01 | -2.74  | 17.60 | 8.76E-01 |
| cg02808411 | 19.06  | 7.55  | 1.15E-02 | 31.68  | 24.20 | 1.90E-01 | -5.87  | 30.39  | 8.47E-01 | 19.64  | 8.54  | 2.15E-02 | 16.77  | 30.59 | 5.84E-01 |
| cg07613792 | 20.69  | 8.19  | 1.15E-02 | 33.60  | 14.10 | 1.72E-02 | -6.12  | 24.42  | 8.02E-01 | 31.12  | 17.55 | 7.62E-02 | 9.83   | 14.20 | 4.89E-01 |
| cg16389924 | 26.07  | 10.32 | 1.15E-02 | 14.86  | 14.21 | 2.96E-01 | 31.25  | 25.20  | 2.15E-01 | 14.84  | 34.79 | 6.70E-01 | 53.90  | 22.16 | 1.50E-02 |
| cg12063947 | -47.00 | 18.60 | 1.15E-02 | -52.94 | 24.12 | 2.82E-02 | 85.70  | 82.28  | 2.98E-01 | -72.58 | 38.35 | 5.84E-02 | -37.06 | 39.72 | 3.51E-01 |
| cg15691822 | 28.26  | 11.19 | 1.15E-02 | 51.43  | 20.98 | 1.42E-02 | 30.05  | 47.07  | 5.23E-01 | 14.19  | 15.45 | 3.58E-01 | 33.39  | 30.48 | 2.73E-01 |
| cg09326832 | 8.48   | 3.36  | 1.15E-02 | 10.82  | 4.34  | 1.27E-02 | 6.35   | 9.14   | 4.88E-01 | 1.15   | 10.85 | 9.15E-01 | 6.10   | 8.08  | 4.50E-01 |
| cg06187843 | 39.92  | 15.80 | 1.15E-02 | 45.56  | 48.19 | 3.44E-01 | -92.87 | 189.21 | 6.24E-01 | 38.82  | 17.59 | 2.73E-02 | 55.47  | 56.53 | 3.26E-01 |
| cg07801181 | 13.98  | 5.54  | 1.15E-02 | 22.60  | 8.86  | 1.08E-02 | 7.97   | 11.95  | 5.05E-01 | 9.69   | 9.33  | 2.99E-01 | 0.87   | 26.83 | 9.74E-01 |
| cg16041611 | -18.44 | 7.30  | 1.15E-02 | -20.07 | 13.07 | 1.25E-01 | -6.59  | 22.65  | 7.71E-01 | -26.32 | 11.40 | 2.10E-02 | -4.04  | 17.49 | 8.18E-01 |
| cg16372625 | 57.96  | 22.95 | 1.15E-02 | 57.71  | 27.56 | 3.62E-02 | 3.63   | 190.79 | 9.85E-01 | 65.67  | 78.54 | 4.03E-01 | 59.42  | 50.47 | 2.39E-01 |
| cg08982864 | -16.32 | 6.46  | 1.15E-02 | -20.31 | 9.95  | 4.12E-02 | -7.78  | 15.70  | 6.20E-01 | -14.01 | 15.87 | 3.77E-01 | -16.91 | 13.09 | 1.96E-01 |
| cg09102329 | -11.09 | 4.39  | 1.15E-02 | -23.07 | 9.07  | 1.10E-02 | -7.91  | 14.41  | 5.83E-01 | -5.34  | 5.40  | 3.22E-01 | -17.24 | 11.60 | 1.37E-01 |
| cg23698950 | -8.69  | 3.44  | 1.15E-02 | -7.59  | 6.14  | 2.16E-01 | -15.46 | 14.13  | 2.74E-01 | -8.25  | 4.82  | 8.66E-02 | -10.20 | 10.15 | 3.15E-01 |
| cg14655316 | 34.55  | 13.68 | 1.15E-02 | 46.31  | 21.05 | 2.78E-02 | 28.02  | 47.28  | 5.53E-01 | 61.62  | 41.58 | 1.38E-01 | 15.50  | 22.02 | 4.82E-01 |
| cg16705929 | -8.57  | 3.39  | 1.15E-02 | -8.50  | 4.67  | 6.90E-02 | -9.35  | 8.21   | 2.55E-01 | -1.70  | 8.43  | 8.40E-01 | -15.75 | 9.04  | 8.14E-02 |
| cg01191259 | 6.05   | 2.39  | 1.15E-02 | 6.36   | 3.27  | 5.22E-02 | 4.92   | 5.37   | 3.59E-01 | 16.23  | 8.71  | 6.26E-02 | 2.33   | 5.49  | 6.72E-01 |

|              |        |       |          |        |       |          |         |        |          |        |        |          |        |       |          |
|--------------|--------|-------|----------|--------|-------|----------|---------|--------|----------|--------|--------|----------|--------|-------|----------|
| cg05292310   | -12.38 | 4.90  | 1.16E-02 | -11.41 | 10.47 | 2.76E-01 | -7.85   | 16.03  | 6.25E-01 | -10.43 | 6.63   | 1.16E-01 | -24.29 | 13.00 | 6.17E-02 |
| cg11018723   | -45.98 | 18.21 | 1.16E-02 | -30.53 | 41.61 | 4.63E-01 | -420.70 | 284.28 | 1.39E-01 | -47.69 | 21.44  | 2.61E-02 | -48.23 | 63.03 | 4.44E-01 |
| cg02792086   | 36.70  | 14.53 | 1.16E-02 | 15.19  | 30.63 | 6.20E-01 | -80.21  | 136.97 | 5.58E-01 | 46.37  | 17.77  | 9.06E-03 | 33.45  | 47.26 | 4.79E-01 |
| cg07267845   | -13.69 | 5.42  | 1.16E-02 | -20.66 | 8.63  | 1.67E-02 | -0.15   | 14.91  | 9.92E-01 | -11.61 | 9.99   | 2.45E-01 | -11.77 | 12.81 | 3.58E-01 |
| cg14999001   | 17.21  | 6.82  | 1.16E-02 | 8.55   | 19.45 | 6.60E-01 | 5.61    | 25.49  | 8.26E-01 | 23.13  | 8.45   | 6.18E-03 | 4.52   | 17.36 | 7.94E-01 |
| cg06429887   | 18.85  | 7.46  | 1.16E-02 | 33.60  | 18.04 | 6.25E-02 | 36.72   | 20.60  | 7.46E-02 | 12.04  | 9.59   | 2.09E-01 | 10.64  | 24.65 | 6.66E-01 |
| cg23304647   | 8.67   | 3.43  | 1.16E-02 | 9.18   | 4.79  | 5.50E-02 | 9.00    | 8.26   | 2.76E-01 | 9.74   | 8.58   | 2.56E-01 | 5.43   | 8.78  | 5.36E-01 |
| cg22776451   | -10.52 | 4.17  | 1.16E-02 | -24.86 | 10.30 | 1.58E-02 | -13.51  | 14.06  | 3.37E-01 | -5.82  | 5.20   | 2.64E-01 | -14.34 | 12.72 | 2.60E-01 |
| cg14192130   | -9.23  | 3.66  | 1.16E-02 | -8.94  | 4.65  | 5.46E-02 | -7.16   | 9.77   | 4.63E-01 | -13.09 | 12.04  | 2.77E-01 | -10.03 | 9.48  | 2.90E-01 |
| ch.5.236818R | -30.68 | 12.15 | 1.16E-02 | -32.21 | 16.40 | 4.95E-02 | -27.61  | 31.96  | 3.88E-01 | -19.49 | 41.47  | 6.38E-01 | -33.23 | 25.85 | 1.99E-01 |
| cg15074329   | -15.17 | 6.01  | 1.16E-02 | -7.17  | 11.24 | 5.24E-01 | -1.35   | 16.16  | 9.34E-01 | -22.98 | 10.23  | 2.47E-02 | -21.65 | 12.48 | 8.29E-02 |
| cg00791024   | 20.98  | 8.31  | 1.16E-02 | 46.09  | 20.20 | 2.25E-02 | 18.97   | 43.48  | 6.63E-01 | 15.92  | 10.13  | 1.16E-01 | 14.61  | 23.80 | 5.39E-01 |
| cg06642397   | -12.59 | 4.99  | 1.16E-02 | -7.06  | 12.37 | 5.68E-01 | -14.19  | 20.89  | 4.97E-01 | -13.10 | 5.95   | 2.77E-02 | -18.45 | 17.90 | 3.02E-01 |
| cg05852824   | -13.22 | 5.24  | 1.16E-02 | -9.37  | 7.91  | 2.37E-01 | -1.03   | 12.71  | 9.36E-01 | -22.72 | 12.04  | 5.92E-02 | -22.91 | 11.63 | 4.89E-02 |
| cg07325692   | -15.03 | 5.95  | 1.16E-02 | -18.08 | 11.58 | 1.18E-01 | 1.37    | 20.08  | 9.46E-01 | -16.29 | 8.08   | 4.37E-02 | -14.60 | 18.46 | 4.29E-01 |
| cg16245698   | 7.12   | 2.82  | 1.16E-02 | 8.72   | 4.81  | 6.97E-02 | 13.29   | 5.89   | 2.41E-02 | 7.00   | 4.22   | 9.67E-02 | -2.90  | 6.57  | 6.59E-01 |
| cg08321129   | -30.82 | 12.21 | 1.16E-02 | -37.54 | 12.38 | 2.43E-03 | 36.48   | 39.47  | 3.55E-01 | -25.57 | 50.34  | 6.12E-01 | -40.68 | 24.44 | 9.60E-02 |
| cg14171824   | -9.54  | 3.78  | 1.16E-02 | -9.49  | 5.07  | 6.13E-02 | -15.27  | 8.57   | 7.48E-02 | 7.01   | 12.87  | 5.86E-01 | -11.58 | 9.31  | 2.14E-01 |
| cg03286391   | -29.39 | 11.65 | 1.16E-02 | -20.68 | 15.72 | 1.88E-01 | 23.15   | 54.17  | 6.69E-01 | -63.51 | 31.84  | 4.61E-02 | -39.18 | 22.37 | 7.99E-02 |
| cg06865119   | -15.66 | 6.21  | 1.16E-02 | -8.72  | 19.73 | 6.58E-01 | -11.22  | 22.30  | 6.15E-01 | -17.57 | 7.16   | 1.41E-02 | -10.10 | 23.10 | 6.62E-01 |
| cg25650360   | -8.77  | 3.47  | 1.16E-02 | -16.32 | 7.77  | 3.56E-02 | -20.64  | 13.89  | 1.37E-01 | -5.64  | 4.40   | 2.00E-01 | -6.11  | 10.35 | 5.55E-01 |
| cg16116203   | -12.59 | 4.99  | 1.16E-02 | -19.59 | 7.32  | 7.44E-03 | -10.47  | 10.38  | 3.13E-01 | -8.14  | 18.66  | 6.63E-01 | -2.10  | 10.33 | 8.39E-01 |
| cg25010998   | -70.44 | 27.91 | 1.16E-02 | -85.72 | 33.11 | 9.64E-03 | -243.87 | 183.02 | 1.83E-01 | 18.32  | 103.71 | 8.60E-01 | -26.79 | 63.41 | 6.73E-01 |
| cg24530471   | -14.12 | 5.60  | 1.16E-02 | -16.42 | 12.61 | 1.93E-01 | 2.60    | 22.17  | 9.07E-01 | -17.17 | 6.93   | 1.33E-02 | 1.45   | 18.86 | 9.39E-01 |
| cg24590633   | -44.31 | 17.56 | 1.16E-02 | -74.13 | 33.51 | 2.70E-02 | -193.94 | 109.81 | 7.74E-02 | -32.96 | 17.26  | 5.61E-02 | -14.35 | 48.05 | 7.65E-01 |
| cg08619893   | -11.87 | 4.71  | 1.16E-02 | -18.23 | 7.94  | 2.16E-02 | -1.59   | 11.62  | 8.91E-01 | -9.69  | 9.39   | 3.02E-01 | -11.88 | 9.73  | 2.22E-01 |
| cg15717071   | 37.58  | 14.89 | 1.16E-02 | 27.91  | 22.18 | 2.08E-01 | 40.09   | 44.33  | 3.66E-01 | 54.52  | 50.76  | 2.83E-01 | 45.06  | 25.16 | 7.34E-02 |
| cg24009995   | 38.67  | 15.33 | 1.16E-02 | 42.70  | 19.43 | 2.80E-02 | 44.49   | 51.57  | 3.88E-01 | 82.27  | 53.10  | 1.21E-01 | 6.41   | 33.76 | 8.49E-01 |
| cg19823494   | -16.76 | 6.64  | 1.16E-02 | -26.35 | 11.61 | 2.32E-02 | 0.10    | 14.08  | 9.94E-01 | -11.31 | 12.51  | 3.66E-01 | -29.59 | 16.23 | 6.83E-02 |
| cg03717367   | 7.67   | 3.04  | 1.16E-02 | 8.80   | 4.20  | 3.63E-02 | 14.25   | 7.03   | 4.26E-02 | 0.12   | 7.58   | 9.88E-01 | 2.95   | 8.48  | 7.28E-01 |
| cg01414687   | 13.98  | 5.54  | 1.16E-02 | 12.21  | 14.15 | 3.88E-01 | 51.37   | 27.79  | 6.45E-02 | 12.10  | 6.74   | 7.25E-02 | 14.42  | 15.33 | 3.47E-01 |
| cg20801110   | 12.34  | 4.89  | 1.16E-02 | 9.33   | 7.25  | 1.98E-01 | 23.15   | 9.29   | 1.27E-02 | 12.62  | 16.70  | 4.50E-01 | 3.28   | 11.46 | 7.75E-01 |
| cg27578811   | 11.98  | 4.75  | 1.16E-02 | 7.53   | 8.62  | 3.82E-01 | 17.19   | 10.42  | 9.90E-02 | 18.78  | 11.12  | 9.11E-02 | 8.79   | 8.56  | 3.05E-01 |
| cg21888330   | -16.66 | 6.61  | 1.16E-02 | -17.73 | 17.72 | 3.17E-01 | -1.15   | 24.10  | 9.62E-01 | -15.17 | 7.76   | 5.05E-02 | -51.41 | 26.85 | 5.55E-02 |
| cg03948781   | 6.30   | 2.50  | 1.16E-02 | 6.24   | 3.54  | 7.76E-02 | 8.62    | 5.31   | 1.04E-01 | -2.14  | 7.44   | 7.74E-01 | 9.13   | 6.13  | 1.36E-01 |

|            |        |       |          |        |       |          |         |        |          |        |       |          |         |       |          |
|------------|--------|-------|----------|--------|-------|----------|---------|--------|----------|--------|-------|----------|---------|-------|----------|
| cg16216305 | -36.63 | 14.52 | 1.16E-02 | -19.10 | 47.51 | 6.88E-01 | 6.04    | 185.48 | 9.74E-01 | -32.47 | 15.94 | 4.17E-02 | -111.91 | 54.49 | 4.00E-02 |
| cg09925620 | 23.45  | 9.30  | 1.17E-02 | 23.90  | 12.49 | 5.57E-02 | 47.77   | 20.38  | 1.91E-02 | 11.41  | 32.30 | 7.24E-01 | -4.34   | 23.59 | 8.54E-01 |
| cg02169333 | 44.37  | 17.59 | 1.17E-02 | -1.01  | 53.32 | 9.85E-01 | 35.44   | 243.21 | 8.84E-01 | 53.55  | 19.35 | 5.66E-03 | 0.98    | 71.81 | 9.89E-01 |
| cg14838566 | -13.53 | 5.36  | 1.17E-02 | -6.41  | 10.02 | 5.22E-01 | 5.50    | 20.50  | 7.89E-01 | -20.21 | 7.67  | 8.39E-03 | -13.96  | 13.56 | 3.03E-01 |
| cg02770054 | 21.35  | 8.47  | 1.17E-02 | 13.59  | 11.23 | 2.26E-01 | 56.07   | 34.71  | 1.06E-01 | 36.88  | 37.11 | 3.20E-01 | 26.14   | 14.95 | 8.04E-02 |
| cg11866943 | 12.33  | 4.89  | 1.17E-02 | 12.10  | 6.98  | 8.31E-02 | 19.72   | 10.24  | 5.41E-02 | 1.95   | 15.22 | 8.98E-01 | 9.53    | 11.57 | 4.10E-01 |
| cg27291710 | -11.22 | 4.45  | 1.17E-02 | -9.27  | 6.27  | 1.39E-01 | -23.23  | 10.01  | 2.03E-02 | 4.02   | 14.59 | 7.83E-01 | -11.36  | 9.82  | 2.47E-01 |
| cg05388330 | 21.64  | 8.58  | 1.17E-02 | 15.09  | 15.24 | 3.22E-01 | 38.85   | 21.01  | 6.45E-02 | 25.76  | 13.67 | 5.96E-02 | 1.92    | 24.53 | 9.38E-01 |
| cg27230009 | 11.31  | 4.48  | 1.17E-02 | 9.59   | 5.98  | 1.09E-01 | 20.28   | 10.94  | 6.38E-02 | 22.40  | 14.32 | 1.18E-01 | 1.81    | 10.82 | 8.67E-01 |
| cg00445566 | 41.19  | 16.33 | 1.17E-02 | 26.06  | 20.17 | 1.96E-01 | 130.17  | 83.83  | 1.20E-01 | 42.63  | 87.90 | 6.28E-01 | 65.09   | 31.33 | 3.77E-02 |
| cg04567588 | 34.10  | 13.52 | 1.17E-02 | 64.49  | 32.70 | 4.86E-02 | -116.60 | 123.11 | 3.44E-01 | 34.24  | 14.48 | 1.80E-02 | -5.48   | 46.37 | 9.06E-01 |
| cg20878925 | 16.98  | 6.73  | 1.17E-02 | 19.31  | 16.01 | 2.28E-01 | 11.47   | 36.56  | 7.54E-01 | 13.33  | 8.02  | 9.64E-02 | 45.16   | 23.30 | 5.27E-02 |
| cg24235828 | -39.94 | 15.84 | 1.17E-02 | -37.19 | 22.45 | 9.76E-02 | -5.03   | 46.97  | 9.15E-01 | -60.85 | 35.34 | 8.52E-02 | -46.03  | 36.56 | 2.08E-01 |
| cg00086493 | -12.14 | 4.81  | 1.17E-02 | -12.17 | 6.74  | 7.09E-02 | -17.78  | 10.62  | 9.41E-02 | -4.83  | 18.60 | 7.95E-01 | -8.99   | 10.33 | 3.84E-01 |
| cg23153707 | 21.73  | 8.62  | 1.17E-02 | 31.51  | 12.00 | 8.65E-03 | 36.37   | 31.51  | 2.48E-01 | 8.96   | 37.50 | 8.11E-01 | 6.41    | 14.44 | 6.57E-01 |
| cg08595592 | -8.64  | 3.42  | 1.17E-02 | -8.76  | 7.46  | 2.40E-01 | 3.73    | 15.27  | 8.07E-01 | -8.23  | 4.41  | 6.21E-02 | -14.84  | 9.29  | 1.10E-01 |
| cg19627145 | 19.52  | 7.74  | 1.17E-02 | 11.85  | 16.48 | 4.72E-01 | 18.90   | 18.08  | 2.96E-01 | 28.49  | 11.15 | 1.06E-02 | -2.76   | 23.03 | 9.05E-01 |
| cg05896714 | -50.65 | 20.09 | 1.17E-02 | -61.82 | 28.62 | 3.08E-02 | 55.71   | 72.13  | 4.40E-01 | -73.04 | 48.89 | 1.35E-01 | -46.69  | 39.34 | 2.35E-01 |
| cg05122803 | -9.48  | 3.76  | 1.17E-02 | -13.25 | 7.91  | 9.38E-02 | -12.05  | 14.74  | 4.14E-01 | -6.61  | 4.96  | 1.82E-01 | -14.16  | 10.26 | 1.68E-01 |
| cg10838789 | 30.30  | 12.02 | 1.17E-02 | 26.10  | 15.39 | 8.99E-02 | 73.52   | 58.20  | 2.07E-01 | 42.14  | 57.72 | 4.65E-01 | 30.99   | 21.80 | 1.55E-01 |
| cg00433284 | 62.53  | 24.80 | 1.17E-02 | 22.78  | 26.64 | 3.93E-01 | 91.60   | 75.77  | 2.27E-01 | 155.04 | 86.37 | 7.27E-02 | 86.50   | 33.07 | 8.90E-03 |
| cg17535314 | -10.40 | 4.13  | 1.17E-02 | -12.29 | 7.17  | 8.63E-02 | -11.81  | 10.10  | 2.42E-01 | -5.02  | 7.57  | 5.07E-01 | -14.00  | 9.12  | 1.25E-01 |
| cg22534681 | -24.72 | 9.81  | 1.17E-02 | -19.44 | 33.25 | 5.59E-01 | -235.89 | 165.25 | 1.53E-01 | -23.45 | 10.61 | 2.71E-02 | -39.22  | 41.75 | 3.48E-01 |
| cg20373747 | 23.93  | 9.49  | 1.17E-02 | 37.76  | 22.29 | 9.02E-02 | 22.82   | 38.94  | 5.58E-01 | 17.86  | 11.56 | 1.22E-01 | 43.56   | 32.70 | 1.83E-01 |
| cg14724918 | -45.25 | 17.95 | 1.17E-02 | -51.67 | 22.90 | 2.41E-02 | -88.12  | 63.39  | 1.64E-01 | 59.10  | 72.74 | 4.16E-01 | -41.07  | 36.32 | 2.58E-01 |
| cg25741837 | 12.09  | 4.80  | 1.17E-02 | 11.26  | 6.62  | 8.89E-02 | 17.46   | 10.27  | 8.91E-02 | 6.92   | 16.12 | 6.68E-01 | 10.45   | 11.70 | 3.72E-01 |
| cg02167201 | -17.40 | 6.90  | 1.17E-02 | -19.60 | 10.11 | 5.25E-02 | -0.50   | 15.13  | 9.74E-01 | -21.44 | 20.38 | 2.93E-01 | -27.01  | 15.03 | 7.23E-02 |
| cg11531021 | 22.71  | 9.01  | 1.17E-02 | 28.85  | 34.47 | 4.03E-01 | -83.80  | 118.23 | 4.78E-01 | 26.45  | 9.74  | 6.63E-03 | -19.75  | 33.88 | 5.60E-01 |
| cg04460548 | 60.76  | 24.11 | 1.17E-02 | 47.31  | 34.47 | 1.70E-01 | 144.04  | 87.50  | 9.97E-02 | 31.10  | 53.41 | 5.60E-01 | 87.97   | 50.12 | 7.92E-02 |
| cg06627801 | -13.57 | 5.38  | 1.17E-02 | -14.48 | 7.41  | 5.07E-02 | -5.47   | 11.68  | 6.39E-01 | -23.77 | 22.67 | 2.94E-01 | -16.83  | 11.94 | 1.59E-01 |
| cg17156432 | -11.12 | 4.41  | 1.17E-02 | -8.36  | 6.58  | 2.04E-01 | -22.99  | 9.60   | 1.66E-02 | -0.57  | 13.64 | 9.67E-01 | -10.42  | 9.13  | 2.53E-01 |
| cg17907520 | -20.56 | 8.16  | 1.17E-02 | -12.95 | 10.29 | 2.08E-01 | -33.23  | 17.76  | 6.13E-02 | -3.82  | 16.21 | 8.14E-01 | -41.81  | 16.42 | 1.09E-02 |
| cg08591998 | 23.20  | 9.21  | 1.17E-02 | 7.26   | 18.52 | 6.95E-01 | 40.49   | 18.22  | 2.62E-02 | 13.74  | 15.27 | 3.68E-01 | 45.26   | 25.13 | 7.17E-02 |
| cg18057618 | -18.24 | 7.24  | 1.17E-02 | -11.62 | 11.39 | 3.08E-01 | -45.45  | 18.58  | 1.45E-02 | -8.75  | 14.10 | 5.35E-01 | -23.40  | 16.40 | 1.54E-01 |
| cg16145799 | 19.06  | 7.56  | 1.17E-02 | 7.99   | 20.87 | 7.02E-01 | 31.69   | 31.23  | 3.10E-01 | 20.99  | 8.71  | 1.60E-02 | 5.98    | 31.85 | 8.51E-01 |



|            |        |       |          |        |       |          |         |        |          |        |       |          |        |       |          |
|------------|--------|-------|----------|--------|-------|----------|---------|--------|----------|--------|-------|----------|--------|-------|----------|
| cg05266437 | 34.50  | 13.69 | 1.17E-02 | 26.12  | 17.24 | 1.30E-01 | 51.64   | 20.57  | 1.21E-02 | 8.10   | 12.94 | 5.31E-01 | 70.37  | 23.75 | 3.05E-03 |
| cg17297628 | -19.33 | 7.67  | 1.18E-02 | -11.97 | 19.48 | 5.39E-01 | -4.03   | 23.71  | 8.65E-01 | -22.38 | 9.45  | 1.79E-02 | -28.38 | 26.86 | 2.91E-01 |
| cg11168293 | -12.16 | 4.83  | 1.18E-02 | -15.17 | 7.51  | 4.34E-02 | -4.79   | 12.18  | 6.94E-01 | -20.47 | 10.71 | 5.60E-02 | -4.35  | 10.13 | 6.68E-01 |
| cg07309864 | -15.12 | 6.00  | 1.18E-02 | -22.76 | 12.37 | 6.58E-02 | -16.17  | 14.66  | 2.70E-01 | -7.62  | 9.51  | 4.23E-01 | -20.20 | 13.44 | 1.33E-01 |
| cg05357527 | 66.69  | 26.47 | 1.18E-02 | 38.11  | 39.41 | 3.33E-01 | 171.35  | 100.23 | 8.73E-02 | 68.99  | 70.65 | 3.29E-01 | 82.24  | 45.48 | 7.06E-02 |
| cg22864337 | 43.47  | 17.25 | 1.18E-02 | 54.12  | 35.72 | 1.30E-01 | 77.99   | 64.29  | 2.25E-01 | 21.74  | 12.90 | 9.19E-02 | 90.21  | 36.56 | 1.36E-02 |
| cg01290568 | 7.86   | 3.12  | 1.18E-02 | 5.44   | 4.09  | 1.84E-01 | 15.02   | 6.52   | 2.13E-02 | 8.96   | 12.32 | 4.67E-01 | 5.44   | 8.74  | 5.34E-01 |
| cg10357841 | 30.46  | 12.09 | 1.18E-02 | -5.30  | 40.71 | 8.96E-01 | -7.91   | 119.25 | 9.47E-01 | 33.65  | 13.27 | 1.12E-02 | 43.00  | 45.26 | 3.42E-01 |
| cg02714994 | -7.30  | 2.90  | 1.18E-02 | -8.48  | 4.22  | 4.43E-02 | -8.25   | 6.08   | 1.75E-01 | -5.91  | 9.85  | 5.49E-01 | -4.25  | 6.28  | 4.98E-01 |
| cg05277146 | -10.23 | 4.06  | 1.18E-02 | -8.79  | 10.70 | 4.11E-01 | -6.53   | 20.06  | 7.45E-01 | -9.87  | 4.74  | 3.71E-02 | -18.16 | 14.46 | 2.09E-01 |
| cg00901598 | -5.59  | 2.22  | 1.18E-02 | -4.67  | 3.63  | 1.98E-01 | -6.51   | 4.92   | 1.86E-01 | -6.66  | 4.23  | 1.15E-01 | -4.66  | 5.81  | 4.23E-01 |
| cg24023588 | -28.72 | 11.40 | 1.18E-02 | -19.13 | 28.98 | 5.09E-01 | -82.73  | 116.95 | 4.79E-01 | -34.83 | 13.08 | 7.77E-03 | 19.40  | 41.31 | 6.39E-01 |
| cg06956444 | -15.22 | 6.04  | 1.18E-02 | -19.75 | 12.15 | 1.04E-01 | -1.27   | 14.80  | 9.32E-01 | -14.67 | 9.84  | 1.36E-01 | -21.96 | 13.22 | 9.67E-02 |
| cg27465569 | -12.84 | 5.10  | 1.18E-02 | 2.32   | 12.70 | 8.55E-01 | 1.21    | 15.75  | 9.39E-01 | -18.34 | 6.10  | 2.64E-03 | -16.09 | 16.24 | 3.22E-01 |
| cg08656816 | -12.01 | 4.77  | 1.18E-02 | -15.10 | 7.30  | 3.87E-02 | -9.12   | 11.24  | 4.17E-01 | -4.83  | 11.44 | 6.73E-01 | -14.06 | 10.17 | 1.67E-01 |
| cg02102684 | 12.46  | 4.95  | 1.18E-02 | 12.53  | 7.86  | 1.11E-01 | 6.40    | 9.93   | 5.20E-01 | 11.03  | 13.37 | 4.10E-01 | 20.06  | 10.55 | 5.73E-02 |
| cg13559225 | -47.52 | 18.87 | 1.18E-02 | -55.38 | 46.28 | 2.31E-01 | -160.95 | 196.13 | 4.12E-01 | -43.95 | 22.15 | 4.72E-02 | -49.92 | 60.10 | 4.06E-01 |
| cg25924746 | 9.92   | 3.94  | 1.18E-02 | 14.22  | 7.29  | 5.10E-02 | 6.73    | 10.18  | 5.09E-01 | 9.81   | 5.89  | 9.56E-02 | 3.31   | 11.90 | 7.81E-01 |
| cg12027420 | 29.65  | 11.77 | 1.18E-02 | 38.50  | 31.96 | 2.28E-01 | -24.43  | 120.05 | 8.39E-01 | 26.94  | 13.74 | 5.00E-02 | 40.49  | 33.88 | 2.32E-01 |
| cg01515896 | 38.40  | 15.25 | 1.18E-02 | 49.01  | 18.89 | 9.49E-03 | 12.74   | 52.11  | 8.07E-01 | 4.30   | 53.77 | 9.36E-01 | 27.61  | 35.71 | 4.40E-01 |
| cg02815374 | 13.75  | 5.46  | 1.18E-02 | 11.51  | 6.81  | 9.08E-02 | 28.98   | 15.79  | 6.64E-02 | 3.38   | 20.97 | 8.72E-01 | 15.64  | 13.27 | 2.39E-01 |
| cg17062109 | 17.23  | 6.84  | 1.18E-02 | 46.88  | 19.98 | 1.89E-02 | 51.58   | 74.86  | 4.91E-01 | 14.60  | 7.25  | 4.39E-02 | 2.70   | 19.83 | 8.92E-01 |
| cg25018403 | -13.57 | 5.39  | 1.18E-02 | -20.17 | 6.75  | 2.82E-03 | -6.17   | 11.45  | 5.90E-01 | -26.74 | 16.95 | 1.15E-01 | -0.93  | 10.48 | 9.29E-01 |
| cg14323117 | -8.10  | 3.22  | 1.18E-02 | -1.34  | 6.47  | 8.36E-01 | -8.32   | 11.41  | 4.66E-01 | -10.77 | 4.36  | 1.35E-02 | -9.69  | 8.99  | 2.81E-01 |
| cg17420028 | 6.55   | 2.60  | 1.18E-02 | 6.73   | 3.78  | 7.51E-02 | 18.12   | 8.17   | 2.64E-02 | 4.97   | 4.61  | 2.81E-01 | -0.56  | 7.99  | 9.44E-01 |
| cg03653601 | 35.96  | 14.28 | 1.18E-02 | 25.61  | 18.11 | 1.57E-01 | 80.93   | 75.87  | 2.86E-01 | 97.05  | 63.39 | 1.26E-01 | 41.92  | 26.44 | 1.13E-01 |
| cg21674704 | -16.19 | 6.43  | 1.18E-02 | -16.98 | 10.36 | 1.01E-01 | -0.80   | 18.57  | 9.66E-01 | -16.51 | 13.22 | 2.12E-01 | -21.87 | 12.66 | 8.41E-02 |
| cg22785629 | 21.91  | 8.70  | 1.18E-02 | 20.55  | 14.59 | 1.59E-01 | 13.60   | 16.78  | 4.18E-01 | 39.49  | 18.75 | 3.52E-02 | 15.23  | 21.78 | 4.85E-01 |
| cg09825309 | 10.52  | 4.18  | 1.18E-02 | 12.78  | 6.40  | 4.60E-02 | 14.70   | 8.66   | 8.95E-02 | -3.83  | 10.58 | 7.17E-01 | 12.17  | 9.72  | 2.11E-01 |
| cg17331738 | 26.03  | 10.34 | 1.18E-02 | 14.99  | 37.70 | 6.91E-01 | -9.49   | 74.79  | 8.99E-01 | 31.18  | 11.33 | 5.91E-03 | -12.47 | 38.47 | 7.46E-01 |
| cg05962028 | -7.40  | 2.94  | 1.18E-02 | -5.68  | 4.21  | 1.77E-01 | -14.43  | 6.44   | 2.51E-02 | 2.01   | 11.08 | 8.56E-01 | -7.57  | 6.09  | 2.14E-01 |
| cg07558275 | 14.19  | 5.64  | 1.18E-02 | 5.79   | 8.72  | 5.07E-01 | 29.76   | 16.95  | 7.90E-02 | 26.16  | 11.73 | 2.58E-02 | 10.14  | 11.50 | 3.78E-01 |
| cg01382137 | 23.87  | 9.49  | 1.18E-02 | 29.10  | 13.77 | 3.46E-02 | 7.06    | 28.90  | 8.07E-01 | 33.91  | 21.94 | 1.22E-01 | 12.85  | 19.75 | 5.15E-01 |
| cg05258834 | -19.84 | 7.88  | 1.18E-02 | -19.53 | 14.33 | 1.73E-01 | -9.14   | 15.58  | 5.58E-01 | -23.21 | 14.87 | 1.19E-01 | -31.54 | 19.66 | 1.09E-01 |
| cg03832697 | 19.15  | 7.61  | 1.18E-02 | 25.17  | 15.89 | 1.13E-01 | 34.21   | 46.83  | 4.65E-01 | 14.37  | 11.07 | 1.94E-01 | 20.92  | 14.60 | 1.52E-01 |

|            |        |       |          |        |       |          |         |        |          |        |       |          |        |       |          |
|------------|--------|-------|----------|--------|-------|----------|---------|--------|----------|--------|-------|----------|--------|-------|----------|
| cg06987348 | -8.69  | 3.45  | 1.19E-02 | -0.60  | 7.56  | 9.36E-01 | -17.97  | 10.83  | 9.72E-02 | -8.51  | 4.55  | 6.18E-02 | -16.21 | 10.23 | 1.13E-01 |
| cg27059970 | -16.70 | 6.64  | 1.19E-02 | -21.09 | 9.35  | 2.41E-02 | -16.57  | 15.80  | 2.94E-01 | -13.29 | 16.70 | 4.26E-01 | -6.54  | 16.47 | 6.91E-01 |
| cg08258867 | 30.35  | 12.06 | 1.19E-02 | 66.55  | 18.54 | 3.33E-04 | 17.03   | 17.68  | 3.36E-01 | 16.88  | 16.19 | 2.97E-01 | 22.57  | 21.45 | 2.93E-01 |
| cg06382546 | -7.56  | 3.01  | 1.19E-02 | -6.67  | 6.99  | 3.40E-01 | -4.96   | 7.47   | 5.06E-01 | -7.48  | 4.05  | 6.45E-02 | -13.89 | 9.48  | 1.43E-01 |
| cg03102494 | -4.31  | 1.71  | 1.19E-02 | -7.22  | 2.60  | 5.45E-03 | -0.61   | 3.32   | 8.55E-01 | -4.55  | 5.16  | 3.78E-01 | -2.68  | 3.93  | 4.94E-01 |
| cg24363146 | -34.25 | 13.61 | 1.19E-02 | -16.24 | 48.82 | 7.39E-01 | -124.68 | 208.32 | 5.50E-01 | -34.20 | 14.61 | 1.93E-02 | -55.59 | 60.96 | 3.62E-01 |
| cg05366561 | -6.47  | 2.57  | 1.19E-02 | -5.46  | 3.79  | 1.49E-01 | -9.12   | 6.04   | 1.31E-01 | -1.45  | 7.67  | 8.50E-01 | -8.68  | 5.18  | 9.40E-02 |
| cg01489177 | 15.37  | 6.11  | 1.19E-02 | 11.85  | 9.45  | 2.10E-01 | 24.98   | 11.31  | 2.72E-02 | 18.47  | 18.18 | 3.10E-01 | 5.88   | 14.52 | 6.86E-01 |
| cg19030682 | -7.68  | 3.05  | 1.19E-02 | -7.05  | 4.33  | 1.03E-01 | -4.74   | 8.29   | 5.68E-01 | -13.00 | 8.26  | 1.16E-01 | -7.60  | 6.35  | 2.31E-01 |
| cg14016089 | 15.03  | 5.97  | 1.19E-02 | 30.96  | 16.85 | 6.63E-02 | -2.71   | 51.28  | 9.58E-01 | 14.37  | 6.76  | 3.37E-02 | -0.41  | 21.09 | 9.85E-01 |
| cg14938738 | 20.69  | 8.22  | 1.19E-02 | 15.58  | 11.03 | 1.58E-01 | 8.15    | 24.66  | 7.41E-01 | 25.24  | 23.65 | 2.86E-01 | 38.06  | 17.86 | 3.30E-02 |
| cg21702971 | -26.90 | 10.69 | 1.19E-02 | -38.60 | 13.72 | 4.92E-03 | 4.47    | 18.91  | 8.13E-01 | -48.70 | 21.74 | 2.51E-02 | -23.54 | 16.90 | 1.64E-01 |
| cg00429402 | 26.89  | 10.69 | 1.19E-02 | 5.64   | 25.76 | 8.27E-01 | 5.69    | 36.51  | 8.76E-01 | 30.88  | 13.53 | 2.24E-02 | 52.29  | 31.18 | 9.36E-02 |
| cg13050258 | -17.54 | 6.97  | 1.19E-02 | -1.81  | 19.35 | 9.25E-01 | -2.47   | 37.01  | 9.47E-01 | -19.41 | 7.94  | 1.45E-02 | -35.52 | 27.76 | 2.01E-01 |
| cg19785918 | 9.09   | 3.61  | 1.19E-02 | 9.82   | 5.33  | 6.57E-02 | 13.84   | 7.35   | 5.96E-02 | 3.73   | 14.12 | 7.92E-01 | 4.25   | 7.48  | 5.70E-01 |
| cg15547624 | 31.24  | 12.42 | 1.19E-02 | 11.62  | 30.09 | 6.99E-01 | -171.46 | 187.79 | 3.61E-01 | 37.91  | 14.21 | 7.64E-03 | 17.23  | 49.81 | 7.29E-01 |
| cg19809165 | -40.82 | 16.23 | 1.19E-02 | -23.69 | 24.11 | 3.26E-01 | -76.48  | 41.57  | 6.58E-02 | -2.27  | 41.76 | 9.57E-01 | -71.71 | 31.75 | 2.39E-02 |
| cg12296269 | -15.95 | 6.34  | 1.19E-02 | -16.18 | 10.67 | 1.29E-01 | -12.39  | 13.34  | 3.53E-01 | -25.72 | 16.47 | 1.18E-01 | -13.29 | 12.14 | 2.74E-01 |
| cg01800521 | 17.00  | 6.76  | 1.19E-02 | 31.49  | 11.48 | 6.09E-03 | 21.09   | 15.65  | 1.78E-01 | 9.98   | 16.68 | 5.49E-01 | 4.10   | 11.29 | 7.17E-01 |
| cg23689615 | 10.59  | 4.21  | 1.19E-02 | 12.79  | 5.58  | 2.18E-02 | 18.38   | 11.26  | 1.02E-01 | -2.05  | 13.40 | 8.78E-01 | 4.85   | 9.63  | 6.15E-01 |
| cg15035278 | -23.27 | 9.25  | 1.19E-02 | -25.46 | 10.45 | 1.49E-02 | -22.35  | 32.63  | 4.93E-01 | -41.64 | 50.01 | 4.05E-01 | -0.95  | 29.02 | 9.74E-01 |
| cg07202012 | -14.85 | 5.91  | 1.19E-02 | -12.54 | 10.49 | 2.32E-01 | -7.24   | 17.50  | 6.79E-01 | -18.87 | 9.02  | 3.65E-02 | -14.01 | 15.77 | 3.74E-01 |
| cg13662628 | -20.73 | 8.24  | 1.19E-02 | -19.12 | 16.76 | 2.54E-01 | 7.24    | 20.47  | 7.24E-01 | -26.35 | 13.29 | 4.74E-02 | -33.82 | 17.94 | 5.94E-02 |
| cg23498925 | -16.70 | 6.64  | 1.19E-02 | -20.14 | 14.22 | 1.57E-01 | -11.62  | 17.34  | 5.03E-01 | -19.76 | 9.12  | 3.03E-02 | -1.23  | 20.49 | 9.52E-01 |
| cg12888712 | -11.59 | 4.61  | 1.19E-02 | -24.32 | 8.76  | 5.48E-03 | -6.45   | 15.00  | 6.67E-01 | -7.86  | 6.45  | 2.23E-01 | -3.00  | 12.62 | 8.12E-01 |
| cg03707634 | -14.87 | 5.91  | 1.19E-02 | -13.05 | 10.53 | 2.15E-01 | -14.19  | 14.82  | 3.38E-01 | -16.02 | 8.92  | 7.26E-02 | -16.97 | 20.19 | 4.01E-01 |
| cg05753675 | -59.73 | 23.75 | 1.19E-02 | -62.37 | 65.34 | 3.40E-01 | -77.51  | 223.17 | 7.28E-01 | -54.00 | 28.10 | 5.47E-02 | -84.65 | 63.01 | 1.79E-01 |
| cg00297584 | 40.71  | 16.19 | 1.19E-02 | 34.28  | 23.05 | 1.37E-01 | 42.26   | 49.99  | 3.98E-01 | 30.64  | 40.58 | 4.50E-01 | 59.70  | 32.87 | 6.93E-02 |
| cg20749005 | 27.10  | 10.78 | 1.19E-02 | 38.11  | 17.39 | 2.84E-02 | 29.83   | 51.83  | 5.65E-01 | 7.62   | 16.75 | 6.49E-01 | 50.47  | 27.03 | 6.19E-02 |
| cg25471916 | 39.58  | 15.74 | 1.19E-02 | 47.33  | 19.30 | 1.42E-02 | 1.17    | 55.37  | 9.83E-01 | 38.53  | 50.91 | 4.49E-01 | 27.26  | 39.54 | 4.91E-01 |
| cg00168118 | 19.46  | 7.74  | 1.19E-02 | 14.86  | 13.67 | 2.77E-01 | 16.34   | 15.76  | 3.00E-01 | 23.61  | 15.08 | 1.17E-01 | 25.97  | 18.53 | 1.61E-01 |
| cg09185797 | -15.91 | 6.33  | 1.19E-02 | -2.62  | 16.09 | 8.71E-01 | -3.27   | 29.38  | 9.11E-01 | -18.60 | 7.42  | 1.22E-02 | -25.37 | 23.56 | 2.82E-01 |
| cg06706894 | 13.70  | 5.45  | 1.19E-02 | 19.96  | 14.18 | 1.59E-01 | 29.78   | 42.12  | 4.80E-01 | 11.22  | 6.16  | 6.85E-02 | 27.97  | 23.78 | 2.40E-01 |
| cg20385229 | -11.14 | 4.43  | 1.19E-02 | -15.39 | 8.10  | 5.75E-02 | -0.79   | 11.08  | 9.43E-01 | -10.51 | 7.54  | 1.63E-01 | -14.26 | 10.05 | 1.56E-01 |
| cg25482146 | 10.17  | 4.05  | 1.19E-02 | 10.45  | 5.64  | 6.39E-02 | 8.46    | 9.06   | 3.50E-01 | 19.44  | 13.34 | 1.45E-01 | 6.79   | 9.22  | 4.61E-01 |

|            |        |       |          |        |       |          |        |        |          |        |       |          |        |       |          |
|------------|--------|-------|----------|--------|-------|----------|--------|--------|----------|--------|-------|----------|--------|-------|----------|
| cg11008718 | -37.58 | 14.95 | 1.19E-02 | -9.71  | 38.27 | 8.00E-01 | 84.69  | 195.40 | 6.65E-01 | -46.66 | 16.97 | 5.97E-03 | -6.07  | 58.25 | 9.17E-01 |
| cg05839748 | 21.25  | 8.45  | 1.19E-02 | 22.89  | 16.85 | 1.74E-01 | 20.93  | 20.36  | 3.04E-01 | 19.29  | 12.01 | 1.08E-01 | 28.82  | 29.73 | 3.32E-01 |
| cg12195984 | 33.01  | 13.13 | 1.19E-02 | 12.16  | 37.57 | 7.46E-01 | -90.03 | 172.50 | 6.02E-01 | 30.73  | 14.71 | 3.68E-02 | 100.29 | 47.79 | 3.58E-02 |
| cg06524192 | -15.79 | 6.28  | 1.19E-02 | -1.66  | 16.38 | 9.19E-01 | 6.41   | 32.63  | 8.44E-01 | -21.36 | 7.27  | 3.32E-03 | 1.94   | 23.60 | 9.35E-01 |
| cg13017471 | 15.43  | 6.14  | 1.19E-02 | 23.98  | 11.43 | 3.60E-02 | 14.84  | 14.45  | 3.04E-01 | 12.16  | 9.34  | 1.93E-01 | 5.94   | 19.51 | 7.61E-01 |
| cg22874802 | 16.52  | 6.57  | 1.19E-02 | 17.39  | 10.81 | 1.08E-01 | 15.09  | 13.56  | 2.66E-01 | 20.46  | 19.22 | 2.87E-01 | 14.93  | 12.46 | 2.31E-01 |
| cg02582218 | -9.19  | 3.66  | 1.20E-02 | -10.81 | 9.08  | 2.34E-01 | -15.04 | 16.10  | 3.50E-01 | -9.26  | 4.41  | 3.56E-02 | -2.90  | 11.74 | 8.05E-01 |
| cg05519606 | -10.99 | 4.37  | 1.20E-02 | -15.40 | 10.73 | 1.51E-01 | -0.18  | 18.58  | 9.92E-01 | -7.75  | 4.95  | 1.17E-01 | -30.51 | 13.26 | 2.14E-02 |
| cg00186529 | 6.92   | 2.75  | 1.20E-02 | 2.30   | 4.00  | 5.65E-01 | 11.92  | 6.23   | 5.56E-02 | 11.25  | 8.34  | 1.78E-01 | 10.20  | 5.83  | 7.98E-02 |
| cg04205943 | 21.11  | 8.40  | 1.20E-02 | 32.18  | 21.80 | 1.40E-01 | 36.80  | 30.88  | 2.33E-01 | 20.13  | 11.27 | 7.40E-02 | 10.93  | 17.82 | 5.40E-01 |
| cg06839631 | 14.91  | 5.93  | 1.20E-02 | 28.91  | 12.36 | 1.93E-02 | 5.51   | 17.78  | 7.57E-01 | 11.47  | 10.19 | 2.60E-01 | 11.74  | 10.50 | 2.64E-01 |
| cg27300829 | 11.10  | 4.42  | 1.20E-02 | 18.17  | 5.78  | 1.66E-03 | 5.14   | 8.82   | 5.60E-01 | 16.50  | 8.90  | 6.36E-02 | 0.83   | 7.83  | 9.16E-01 |
| cg25354617 | 27.88  | 11.09 | 1.20E-02 | 29.34  | 15.47 | 5.79E-02 | 32.28  | 22.89  | 1.58E-01 | 31.05  | 33.58 | 3.55E-01 | 12.88  | 29.44 | 6.62E-01 |
| cg09986774 | 18.08  | 7.19  | 1.20E-02 | 13.68  | 16.20 | 3.98E-01 | 58.36  | 58.07  | 3.15E-01 | 18.02  | 8.59  | 3.59E-02 | 21.42  | 24.55 | 3.83E-01 |
| cg22489931 | -8.19  | 3.26  | 1.20E-02 | -8.64  | 4.48  | 5.38E-02 | -10.44 | 8.24   | 2.05E-01 | -6.47  | 8.75  | 4.59E-01 | -6.17  | 7.74  | 4.26E-01 |
| cg24595580 | 7.42   | 2.95  | 1.20E-02 | 7.19   | 3.87  | 6.31E-02 | 13.28  | 7.55   | 7.85E-02 | 10.37  | 8.01  | 1.95E-01 | -1.60  | 8.21  | 8.45E-01 |
| cg01135648 | 7.56   | 3.01  | 1.20E-02 | 8.10   | 3.92  | 3.90E-02 | 8.29   | 9.08   | 3.61E-01 | 7.26   | 7.57  | 3.37E-01 | 5.12   | 7.91  | 5.17E-01 |
| cg26663490 | 9.97   | 3.97  | 1.20E-02 | 9.22   | 5.34  | 8.44E-02 | 10.31  | 8.59   | 2.30E-01 | 13.74  | 12.89 | 2.87E-01 | 9.84   | 10.58 | 3.53E-01 |
| cg24342013 | 10.96  | 4.36  | 1.20E-02 | 6.11   | 5.99  | 3.08E-01 | 11.05  | 8.26   | 1.81E-01 | 21.04  | 19.25 | 2.75E-01 | 25.46  | 11.67 | 2.92E-02 |
| cg16423812 | 31.40  | 12.50 | 1.20E-02 | 24.45  | 44.42 | 5.82E-01 | 170.00 | 210.61 | 4.20E-01 | 32.25  | 13.45 | 1.65E-02 | 18.83  | 54.12 | 7.28E-01 |
| cg11999580 | -10.49 | 4.18  | 1.20E-02 | -20.94 | 8.85  | 1.81E-02 | -7.78  | 13.78  | 5.72E-01 | -5.18  | 5.45  | 3.42E-01 | -20.89 | 13.23 | 1.14E-01 |
| cg25713684 | -34.55 | 13.76 | 1.20E-02 | -43.32 | 16.79 | 9.88E-03 | 3.17   | 58.20  | 9.57E-01 | 40.87  | 54.62 | 4.54E-01 | -39.36 | 30.04 | 1.90E-01 |
| cg06788514 | -15.53 | 6.18  | 1.20E-02 | -17.40 | 8.42  | 3.88E-02 | -20.28 | 13.71  | 1.39E-01 | -9.48  | 12.66 | 4.54E-01 | 12.23  | 44.91 | 7.85E-01 |
| cg24754507 | 22.98  | 9.15  | 1.20E-02 | 41.01  | 20.30 | 4.34E-02 | 38.67  | 32.32  | 2.32E-01 | 18.92  | 11.62 | 1.03E-01 | -1.91  | 29.45 | 9.48E-01 |
| cg20735050 | -15.24 | 6.07  | 1.20E-02 | -29.67 | 17.39 | 8.81E-02 | -17.98 | 24.27  | 4.59E-01 | -15.93 | 7.63  | 3.67E-02 | -2.32  | 14.19 | 8.70E-01 |
| cg06742778 | -17.05 | 6.79  | 1.20E-02 | -28.84 | 11.08 | 9.26E-03 | -8.02  | 15.25  | 5.99E-01 | -6.57  | 15.18 | 6.65E-01 | -14.68 | 14.25 | 3.03E-01 |
| cg26039482 | -23.23 | 9.25  | 1.20E-02 | -13.29 | 15.19 | 3.82E-01 | -43.47 | 20.50  | 3.39E-02 | -12.55 | 11.05 | 2.56E-01 | -54.24 | 24.75 | 2.84E-02 |
| cg08964929 | 12.06  | 4.80  | 1.20E-02 | 10.19  | 10.66 | 3.39E-01 | 12.58  | 15.79  | 4.26E-01 | 16.50  | 6.26  | 8.34E-03 | -7.76  | 14.14 | 5.83E-01 |
| cg08747676 | -10.92 | 4.35  | 1.20E-02 | -6.95  | 6.25  | 2.66E-01 | -16.83 | 10.76  | 1.18E-01 | -19.65 | 13.00 | 1.31E-01 | -10.82 | 8.84  | 2.21E-01 |
| cg23733744 | 27.32  | 10.88 | 1.20E-02 | 60.42  | 30.97 | 5.11E-02 | 32.05  | 106.49 | 7.63E-01 | 24.23  | 12.26 | 4.80E-02 | 5.70   | 38.77 | 8.83E-01 |
| cg26157756 | 34.17  | 13.61 | 1.20E-02 | 50.51  | 17.80 | 4.55E-03 | -41.52 | 59.90  | 4.88E-01 | 55.15  | 48.97 | 2.60E-01 | 18.28  | 21.07 | 3.86E-01 |
| cg10784258 | -9.65  | 3.84  | 1.20E-02 | -15.47 | 9.94  | 1.20E-01 | 1.85   | 19.71  | 9.25E-01 | -8.71  | 4.58  | 5.72E-02 | -11.77 | 11.67 | 3.13E-01 |
| cg12833765 | -10.73 | 4.27  | 1.20E-02 | -13.13 | 7.15  | 6.64E-02 | -8.28  | 10.13  | 4.14E-01 | -13.22 | 8.24  | 1.09E-01 | -5.19  | 9.63  | 5.90E-01 |
| cg04315434 | 33.62  | 13.39 | 1.20E-02 | 13.41  | 47.36 | 7.77E-01 | -14.22 | 201.70 | 9.44E-01 | 32.97  | 14.45 | 2.25E-02 | 75.36  | 55.99 | 1.78E-01 |
| cg20984924 | -19.33 | 7.70  | 1.20E-02 | -23.18 | 18.42 | 2.08E-01 | -4.34  | 23.11  | 8.51E-01 | -23.05 | 9.96  | 2.07E-02 | -8.81  | 22.49 | 6.95E-01 |

|            |        |       |          |        |       |          |         |        |          |        |       |          |        |       |          |
|------------|--------|-------|----------|--------|-------|----------|---------|--------|----------|--------|-------|----------|--------|-------|----------|
| cg09556823 | 22.31  | 8.89  | 1.20E-02 | 31.55  | 15.84 | 4.64E-02 | 16.05   | 35.90  | 6.55E-01 | 15.84  | 12.41 | 2.02E-01 | 29.51  | 26.66 | 2.68E-01 |
| cg24376214 | -9.26  | 3.69  | 1.20E-02 | -12.71 | 6.73  | 5.88E-02 | -5.27   | 14.60  | 7.18E-01 | -5.62  | 5.18  | 2.79E-01 | -17.44 | 10.24 | 8.86E-02 |
| cg00469800 | 11.50  | 4.58  | 1.20E-02 | 9.60   | 5.59  | 8.61E-02 | 27.11   | 11.21  | 1.56E-02 | 17.88  | 15.36 | 2.45E-01 | 1.65   | 9.92  | 8.68E-01 |
| cg02920992 | -17.31 | 6.89  | 1.21E-02 | -10.04 | 13.80 | 4.67E-01 | -47.57  | 30.59  | 1.20E-01 | -17.69 | 8.92  | 4.73E-02 | -17.83 | 21.64 | 4.10E-01 |
| cg09039367 | 17.56  | 6.99  | 1.21E-02 | 30.34  | 16.94 | 7.32E-02 | 4.19    | 31.57  | 8.94E-01 | 12.22  | 8.38  | 1.45E-01 | 43.94  | 24.23 | 6.97E-02 |
| cg13527203 | -16.19 | 6.45  | 1.21E-02 | -19.63 | 8.69  | 2.38E-02 | -14.39  | 25.56  | 5.73E-01 | -24.84 | 22.06 | 2.60E-01 | -7.78  | 11.77 | 5.09E-01 |
| cg15701332 | -16.30 | 6.49  | 1.21E-02 | -5.10  | 17.00 | 7.64E-01 | 17.04   | 30.27  | 5.73E-01 | -22.25 | 7.57  | 3.30E-03 | 0.27   | 24.06 | 9.91E-01 |
| cg21387147 | 18.88  | 7.52  | 1.21E-02 | 34.98  | 19.23 | 6.89E-02 | 19.87   | 25.71  | 4.40E-01 | 12.21  | 9.10  | 1.79E-01 | 44.51  | 26.88 | 9.77E-02 |
| cg14207147 | 11.31  | 4.51  | 1.21E-02 | 13.84  | 6.36  | 2.95E-02 | -3.15   | 10.97  | 7.74E-01 | 20.32  | 12.27 | 9.77E-02 | 11.11  | 10.25 | 2.78E-01 |
| cg23561531 | -13.01 | 5.18  | 1.21E-02 | -17.33 | 7.74  | 2.52E-02 | -8.20   | 12.63  | 5.16E-01 | -11.11 | 13.78 | 4.20E-01 | -9.45  | 10.53 | 3.69E-01 |
| cg08559424 | -17.05 | 6.79  | 1.21E-02 | -24.46 | 10.99 | 2.61E-02 | -23.41  | 14.31  | 1.02E-01 | -11.38 | 15.58 | 4.65E-01 | -1.39  | 15.06 | 9.27E-01 |
| cg18905161 | -11.90 | 4.74  | 1.21E-02 | -13.70 | 7.31  | 6.09E-02 | -10.02  | 9.59   | 2.96E-01 | 1.58   | 13.17 | 9.04E-01 | -18.94 | 10.46 | 7.00E-02 |
| cg11199137 | -35.40 | 14.10 | 1.21E-02 | -33.30 | 52.87 | 5.29E-01 | -193.01 | 228.89 | 3.99E-01 | -29.61 | 15.26 | 5.23E-02 | -99.05 | 53.05 | 6.19E-02 |
| cg24536782 | -2.70  | 1.08  | 1.21E-02 | -3.30  | 1.61  | 3.98E-02 | -3.93   | 1.92   | 4.12E-02 | -0.74  | 3.87  | 8.49E-01 | 0.45   | 2.70  | 8.69E-01 |
| cg22483610 | 14.45  | 5.76  | 1.21E-02 | 22.41  | 8.79  | 1.08E-02 | 16.02   | 16.52  | 3.32E-01 | 14.47  | 13.35 | 2.79E-01 | 0.76   | 11.21 | 9.46E-01 |
| cg19447630 | -28.49 | 11.35 | 1.21E-02 | -32.67 | 15.55 | 3.57E-02 | 8.93    | 23.99  | 7.10E-01 | -44.62 | 31.13 | 1.52E-01 | -45.05 | 22.52 | 4.54E-02 |
| cg04797742 | 12.46  | 4.96  | 1.21E-02 | 4.71   | 7.57  | 5.34E-01 | 10.10   | 10.25  | 3.25E-01 | 18.65  | 16.76 | 2.66E-01 | 25.60  | 9.86  | 9.43E-03 |
| cg14990262 | -30.79 | 12.27 | 1.21E-02 | -62.18 | 45.58 | 1.73E-01 | -159.89 | 144.16 | 2.67E-01 | -23.25 | 13.27 | 7.98E-02 | -79.82 | 47.78 | 9.48E-02 |
| cg12612091 | 18.75  | 7.47  | 1.21E-02 | 18.83  | 20.01 | 3.47E-01 | 21.59   | 37.19  | 5.62E-01 | 18.92  | 8.62  | 2.82E-02 | 15.09  | 28.50 | 5.96E-01 |
| cg21870884 | 14.46  | 5.76  | 1.21E-02 | 17.59  | 9.13  | 5.42E-02 | 7.98    | 16.58  | 6.30E-01 | 18.39  | 10.75 | 8.71E-02 | 6.26   | 13.08 | 6.32E-01 |
| cg08324862 | -8.94  | 3.56  | 1.21E-02 | -14.62 | 5.52  | 8.05E-03 | -3.59   | 8.65   | 6.78E-01 | -10.79 | 6.09  | 7.64E-02 | 2.44   | 8.71  | 7.79E-01 |
| cg11592786 | -34.09 | 13.58 | 1.21E-02 | -41.36 | 23.53 | 7.88E-02 | -20.62  | 47.95  | 6.67E-01 | -48.46 | 26.91 | 7.18E-02 | -19.00 | 23.59 | 4.21E-01 |
| cg18460375 | -15.19 | 6.05  | 1.21E-02 | -27.59 | 15.62 | 7.74E-02 | -6.40   | 19.98  | 7.49E-01 | -11.58 | 7.39  | 1.17E-01 | -30.53 | 20.33 | 1.33E-01 |
| cg10608476 | -8.24  | 3.28  | 1.21E-02 | -7.93  | 4.73  | 9.36E-02 | -11.30  | 7.84   | 1.50E-01 | -5.02  | 10.95 | 6.47E-01 | -7.86  | 6.53  | 2.29E-01 |
| cg07566790 | -17.59 | 7.01  | 1.21E-02 | -8.70  | 18.96 | 6.46E-01 | -49.56  | 24.13  | 4.00E-02 | -17.35 | 8.21  | 3.46E-02 | 8.97   | 31.69 | 7.77E-01 |
| cg21142977 | -51.81 | 20.65 | 1.21E-02 | -50.95 | 24.75 | 3.95E-02 | -150.97 | 87.16  | 8.33E-02 | -5.36  | 84.78 | 9.50E-01 | -40.09 | 47.57 | 3.99E-01 |
| cg11022060 | -9.50  | 3.79  | 1.21E-02 | -15.09 | 6.00  | 1.19E-02 | -0.95   | 6.47   | 8.83E-01 | -14.81 | 5.24  | 4.70E-03 | -2.73  | 8.28  | 7.42E-01 |
| cg01641455 | 25.66  | 10.23 | 1.21E-02 | 18.08  | 13.01 | 1.65E-01 | 38.74   | 40.20  | 3.35E-01 | 108.27 | 58.81 | 6.56E-02 | 30.32  | 19.09 | 1.12E-01 |
| cg02628360 | 15.02  | 5.99  | 1.21E-02 | 23.14  | 11.12 | 3.74E-02 | 22.78   | 17.42  | 1.91E-01 | 8.17   | 9.42  | 3.86E-01 | 12.34  | 13.81 | 3.71E-01 |
| cg12133393 | 35.30  | 14.07 | 1.21E-02 | 18.66  | 35.15 | 5.96E-01 | -72.13  | 113.29 | 5.24E-01 | 41.39  | 16.37 | 1.15E-02 | 33.29  | 48.10 | 4.89E-01 |
| cg19818826 | 11.74  | 4.68  | 1.21E-02 | 12.92  | 6.47  | 4.59E-02 | 16.34   | 20.21  | 4.19E-01 | 15.02  | 12.75 | 2.39E-01 | 7.22   | 8.72  | 4.07E-01 |
| cg24336646 | 43.93  | 17.51 | 1.21E-02 | 45.04  | 36.12 | 2.13E-01 | -125.77 | 103.41 | 2.24E-01 | 45.81  | 18.86 | 1.52E-02 | 86.35  | 61.93 | 1.63E-01 |
| cg03775240 | 97.56  | 38.89 | 1.21E-02 | 68.14  | 57.89 | 2.39E-01 | 321.90  | 178.75 | 7.17E-02 | 148.69 | 90.60 | 1.01E-01 | 76.21  | 69.08 | 2.70E-01 |
| cg04943741 | 6.83   | 2.72  | 1.21E-02 | 6.00   | 3.35  | 7.30E-02 | 14.28   | 7.60   | 6.04E-02 | 10.52  | 9.36  | 2.61E-01 | 1.09   | 7.69  | 8.87E-01 |
| cg18596947 | -24.47 | 9.75  | 1.21E-02 | -40.38 | 13.79 | 3.41E-03 | 5.12    | 25.60  | 8.41E-01 | -26.16 | 20.14 | 1.94E-01 | -8.95  | 20.85 | 6.68E-01 |

|                 |        |       |          |        |       |          |         |        |          |        |       |          |         |       |          |
|-----------------|--------|-------|----------|--------|-------|----------|---------|--------|----------|--------|-------|----------|---------|-------|----------|
| cg23855715      | -10.80 | 4.31  | 1.21E-02 | -12.57 | 9.63  | 1.92E-01 | -21.90  | 13.52  | 1.05E-01 | -7.65  | 5.70  | 1.80E-01 | -13.30  | 12.03 | 2.69E-01 |
| cg26382678      | -10.87 | 4.33  | 1.21E-02 | -10.53 | 6.33  | 9.64E-02 | -3.18   | 8.43   | 7.06E-01 | -18.18 | 14.91 | 2.23E-01 | -19.48  | 10.13 | 5.46E-02 |
| cg25250650      | -11.97 | 4.77  | 1.21E-02 | -17.83 | 6.96  | 1.04E-02 | -4.49   | 11.28  | 6.91E-01 | -5.31  | 12.95 | 6.82E-01 | -9.59   | 10.31 | 3.52E-01 |
| cg00405677      | 26.02  | 10.37 | 1.21E-02 | 40.58  | 16.38 | 1.33E-02 | 62.25   | 34.13  | 6.81E-02 | 18.51  | 15.82 | 2.42E-01 | 3.08    | 20.04 | 8.78E-01 |
| cg17465304      | 10.15  | 4.05  | 1.21E-02 | 5.57   | 6.10  | 3.61E-01 | 6.88    | 7.31   | 3.46E-01 | 8.76   | 6.52  | 1.79E-01 | 26.59   | 9.37  | 4.56E-03 |
| cg10172250      | 34.28  | 13.67 | 1.22E-02 | 15.12  | 26.26 | 5.65E-01 | 67.37   | 69.06  | 3.29E-01 | 43.70  | 18.45 | 1.79E-02 | 25.26   | 36.43 | 4.88E-01 |
| cg09773473      | 16.67  | 6.65  | 1.22E-02 | 25.80  | 12.24 | 3.50E-02 | 35.37   | 21.45  | 9.91E-02 | 12.28  | 9.14  | 1.79E-01 | -10.40  | 23.51 | 6.58E-01 |
| cg02567879      | 13.16  | 5.25  | 1.22E-02 | 12.90  | 8.27  | 1.19E-01 | 5.00    | 10.02  | 6.17E-01 | 24.84  | 13.03 | 5.67E-02 | 16.00   | 13.13 | 2.23E-01 |
| cg04023641      | 10.68  | 4.26  | 1.22E-02 | 8.91   | 6.25  | 1.53E-01 | 13.88   | 8.92   | 1.19E-01 | 27.71  | 12.91 | 3.18E-02 | 1.75    | 9.59  | 8.55E-01 |
| cg14134497      | 13.46  | 5.37  | 1.22E-02 | 20.28  | 9.23  | 2.80E-02 | 20.52   | 15.90  | 1.97E-01 | 12.22  | 9.92  | 2.18E-01 | 2.68    | 10.63 | 8.01E-01 |
| cg08039560      | -8.40  | 3.35  | 1.22E-02 | -8.79  | 4.35  | 4.36E-02 | -4.84   | 8.06   | 5.48E-01 | -10.84 | 11.30 | 3.37E-01 | -9.56   | 8.73  | 2.73E-01 |
| cg12972233      | 12.74  | 5.08  | 1.22E-02 | 14.71  | 7.69  | 5.58E-02 | 8.88    | 14.10  | 5.29E-01 | 15.23  | 9.61  | 1.13E-01 | 5.90    | 12.93 | 6.48E-01 |
| cg16295461      | 18.97  | 7.57  | 1.22E-02 | 10.67  | 12.37 | 3.89E-01 | -8.94   | 21.18  | 6.73E-01 | 30.06  | 9.25  | 1.16E-03 | 23.95   | 18.36 | 1.92E-01 |
| cg19649018      | -17.49 | 6.98  | 1.22E-02 | -27.91 | 9.94  | 4.99E-03 | -1.42   | 15.95  | 9.29E-01 | -1.01  | 20.11 | 9.60E-01 | -17.11  | 15.79 | 2.78E-01 |
| cg16553297      | -8.69  | 3.47  | 1.22E-02 | -12.89 | 6.32  | 4.14E-02 | -4.39   | 10.85  | 6.86E-01 | -6.37  | 5.26  | 2.26E-01 | -9.81   | 8.59  | 2.53E-01 |
| cg19350115      | -9.64  | 3.84  | 1.22E-02 | -11.67 | 8.01  | 1.45E-01 | 7.14    | 17.06  | 6.75E-01 | -12.02 | 4.93  | 1.48E-02 | 0.00    | 11.56 | 1.00E+00 |
| cg07683636      | 11.95  | 4.77  | 1.22E-02 | 10.46  | 6.56  | 1.11E-01 | 20.74   | 12.13  | 8.75E-02 | 13.53  | 12.12 | 2.64E-01 | 6.97    | 11.81 | 5.55E-01 |
| ch.21.39866785R | -51.75 | 20.65 | 1.22E-02 | -60.48 | 26.45 | 2.22E-02 | -57.30  | 121.49 | 6.37E-01 | -9.09  | 89.35 | 9.19E-01 | -41.40  | 37.16 | 2.65E-01 |
| cg12841566      | 17.28  | 6.89  | 1.22E-02 | 31.93  | 21.10 | 1.30E-01 | 16.00   | 24.40  | 5.12E-01 | 16.09  | 7.92  | 4.22E-02 | 7.33    | 29.02 | 8.01E-01 |
| cg04189187      | -10.02 | 4.00  | 1.22E-02 | -13.57 | 5.99  | 2.35E-02 | -6.28   | 14.71  | 6.70E-01 | -11.31 | 9.90  | 2.53E-01 | -5.25   | 7.10  | 4.60E-01 |
| cg05735765      | 21.50  | 8.58  | 1.22E-02 | 17.08  | 10.78 | 1.13E-01 | 21.11   | 36.37  | 5.62E-01 | 76.38  | 45.99 | 9.68E-02 | 24.77   | 16.29 | 1.28E-01 |
| cg22032364      | -8.53  | 3.40  | 1.22E-02 | -13.25 | 7.23  | 6.67E-02 | -3.90   | 12.09  | 7.47E-01 | -7.09  | 4.59  | 1.22E-01 | -9.24   | 8.80  | 2.94E-01 |
| cg04442328      | 19.16  | 7.64  | 1.22E-02 | 37.47  | 16.45 | 2.27E-02 | -25.42  | 38.11  | 5.05E-01 | 17.00  | 9.60  | 7.66E-02 | 11.98   | 23.10 | 6.04E-01 |
| cg06601071      | -7.88  | 3.14  | 1.22E-02 | -8.96  | 4.73  | 5.83E-02 | -5.77   | 6.81   | 3.97E-01 | -7.66  | 7.03  | 2.76E-01 | -7.98   | 8.23  | 3.32E-01 |
| cg22398226      | -9.07  | 3.62  | 1.22E-02 | -11.25 | 8.08  | 1.64E-01 | 1.66    | 13.63  | 9.03E-01 | -8.91  | 4.66  | 5.58E-02 | -12.37  | 10.20 | 2.25E-01 |
| cg14241609      | -77.25 | 30.82 | 1.22E-02 | -61.80 | 42.17 | 1.43E-01 | -126.90 | 128.12 | 3.22E-01 | -76.35 | 69.24 | 2.70E-01 | -103.76 | 67.30 | 1.23E-01 |
| cg00821413      | 24.78  | 9.89  | 1.22E-02 | 29.57  | 19.46 | 1.29E-01 | 19.27   | 22.94  | 4.01E-01 | 27.79  | 14.92 | 6.25E-02 | 11.65   | 28.89 | 6.87E-01 |
| cg26667946      | 10.35  | 4.13  | 1.22E-02 | 10.26  | 5.73  | 7.32E-02 | 21.29   | 13.91  | 1.26E-01 | 28.60  | 19.29 | 1.38E-01 | 5.28    | 7.03  | 4.53E-01 |
| cg14045814      | 21.17  | 8.45  | 1.22E-02 | 33.19  | 14.56 | 2.26E-02 | 19.43   | 16.28  | 2.33E-01 | 4.06   | 17.19 | 8.13E-01 | 24.86   | 21.67 | 2.51E-01 |
| cg05764847      | 41.85  | 16.70 | 1.22E-02 | 58.22  | 21.84 | 7.67E-03 | 27.53   | 57.78  | 6.34E-01 | -4.87  | 44.07 | 9.12E-01 | 32.97   | 38.49 | 3.92E-01 |
| cg17798563      | 12.31  | 4.91  | 1.22E-02 | 7.65   | 7.98  | 3.38E-01 | 16.64   | 9.52   | 8.04E-02 | 29.30  | 17.33 | 9.09E-02 | 9.56    | 9.38  | 3.08E-01 |
| cg00580652      | -11.13 | 4.44  | 1.22E-02 | -3.32  | 5.65  | 5.57E-01 | -23.10  | 9.56   | 1.57E-02 | -9.82  | 8.94  | 2.72E-01 | -16.46  | 8.38  | 4.95E-02 |
| cg02996796      | 17.97  | 7.17  | 1.22E-02 | 19.30  | 14.70 | 1.89E-01 | 30.87   | 38.61  | 4.24E-01 | 16.00  | 8.88  | 7.17E-02 | 24.97   | 26.15 | 3.40E-01 |
| cg10708955      | 10.78  | 4.30  | 1.22E-02 | 11.84  | 5.45  | 2.98E-02 | 17.36   | 11.98  | 1.47E-01 | 11.23  | 16.91 | 5.07E-01 | 2.38    | 10.05 | 8.13E-01 |
| cg06791380      | 27.78  | 11.09 | 1.22E-02 | 26.35  | 18.49 | 1.54E-01 | 62.03   | 26.35  | 1.86E-02 | 13.27  | 6.67  | 4.68E-02 | 51.54   | 27.94 | 6.51E-02 |

|            |        |       |          |        |       |          |         |        |          |         |       |          |        |       |          |
|------------|--------|-------|----------|--------|-------|----------|---------|--------|----------|---------|-------|----------|--------|-------|----------|
| cg24882875 | 19.56  | 7.81  | 1.22E-02 | 5.52   | 13.06 | 6.72E-01 | 14.08   | 23.41  | 5.48E-01 | 26.91   | 13.23 | 4.19E-02 | 36.33  | 18.25 | 4.65E-02 |
| cg25528199 | 32.19  | 12.85 | 1.22E-02 | 30.22  | 12.32 | 1.42E-02 | 95.09   | 59.86  | 1.12E-01 | -15.27  | 43.69 | 7.27E-01 | 79.40  | 52.82 | 1.33E-01 |
| cg13320014 | 51.13  | 20.41 | 1.22E-02 | 48.72  | 27.51 | 7.65E-02 | -51.28  | 88.18  | 5.61E-01 | 49.73   | 65.86 | 4.50E-01 | 74.26  | 37.25 | 4.62E-02 |
| cg24197477 | 9.50   | 3.79  | 1.22E-02 | 10.12  | 5.59  | 7.00E-02 | 6.58    | 8.88   | 4.59E-01 | 17.11   | 7.77  | 2.75E-02 | -3.71  | 10.99 | 7.36E-01 |
| cg17993073 | 28.87  | 11.52 | 1.22E-02 | 24.12  | 18.44 | 1.91E-01 | 18.03   | 33.81  | 5.94E-01 | 28.83   | 33.12 | 3.84E-01 | 37.27  | 18.89 | 4.85E-02 |
| cg03045721 | -51.33 | 20.49 | 1.22E-02 | 14.20  | 52.85 | 7.88E-01 | -78.77  | 265.02 | 7.66E-01 | -67.62  | 24.09 | 5.00E-03 | -33.90 | 59.03 | 5.66E-01 |
| cg24296036 | 22.64  | 9.04  | 1.22E-02 | 23.21  | 19.29 | 2.29E-01 | 23.16   | 19.90  | 2.44E-01 | 11.13   | 14.26 | 4.35E-01 | 47.98  | 21.72 | 2.72E-02 |
| cg27159979 | -12.15 | 4.85  | 1.22E-02 | -18.39 | 7.03  | 8.90E-03 | -9.18   | 11.55  | 4.27E-01 | -3.94   | 12.30 | 7.49E-01 | -6.07  | 11.04 | 5.82E-01 |
| cg09182678 | -18.62 | 7.43  | 1.22E-02 | -12.06 | 10.91 | 2.69E-01 | -23.41  | 21.02  | 2.65E-01 | -6.63   | 27.01 | 8.06E-01 | -28.59 | 12.83 | 2.58E-02 |
| cg13545212 | 16.49  | 6.58  | 1.22E-02 | 21.30  | 14.36 | 1.38E-01 | 20.92   | 28.19  | 4.58E-01 | 17.28   | 8.40  | 3.95E-02 | 2.06   | 18.97 | 9.13E-01 |
| cg01156834 | 15.04  | 6.01  | 1.22E-02 | 10.61  | 7.43  | 1.53E-01 | 31.81   | 12.62  | 1.17E-02 | 24.23   | 11.49 | 3.50E-02 | 2.74   | 9.59  | 7.75E-01 |
| cg02612026 | 39.56  | 15.79 | 1.22E-02 | 36.21  | 20.15 | 7.23E-02 | 52.45   | 73.05  | 4.73E-01 | 96.98   | 76.89 | 2.07E-01 | 36.29  | 28.98 | 2.11E-01 |
| cg22784836 | -12.08 | 4.82  | 1.22E-02 | -20.42 | 7.21  | 4.63E-03 | -4.98   | 9.75   | 6.10E-01 | -1.78   | 16.67 | 9.15E-01 | -7.06  | 10.18 | 4.88E-01 |
| cg22289815 | 17.60  | 7.03  | 1.22E-02 | 21.55  | 10.54 | 4.08E-02 | -0.09   | 16.60  | 9.96E-01 | 21.08   | 13.00 | 1.05E-01 | 22.42  | 24.34 | 3.57E-01 |
| cg21992932 | 6.52   | 2.60  | 1.23E-02 | 7.40   | 3.56  | 3.75E-02 | 7.08    | 5.76   | 2.18E-01 | 17.06   | 13.00 | 1.89E-01 | 1.94   | 5.55  | 7.27E-01 |
| cg04763519 | 9.51   | 3.80  | 1.23E-02 | 10.07  | 5.61  | 7.25E-02 | 7.32    | 7.61   | 3.36E-01 | 5.03    | 12.92 | 6.97E-01 | 12.81  | 8.38  | 1.27E-01 |
| cg23313445 | -16.98 | 6.78  | 1.23E-02 | -25.16 | 18.69 | 1.78E-01 | 10.52   | 29.20  | 7.19E-01 | -14.48  | 7.95  | 6.87E-02 | -42.35 | 22.91 | 6.45E-02 |
| cg19513282 | 29.02  | 11.59 | 1.23E-02 | 33.99  | 16.42 | 3.85E-02 | 20.68   | 23.54  | 3.80E-01 | -6.52   | 37.40 | 8.62E-01 | 47.16  | 28.68 | 1.00E-01 |
| cg02711190 | 26.70  | 10.66 | 1.23E-02 | 17.61  | 33.84 | 6.03E-01 | -92.86  | 123.97 | 4.54E-01 | 32.94   | 11.79 | 5.21E-03 | -17.31 | 38.84 | 6.56E-01 |
| cg24941342 | 6.38   | 2.55  | 1.23E-02 | 4.18   | 3.18  | 1.89E-01 | 10.28   | 6.79   | 1.30E-01 | 16.51   | 7.16  | 2.11E-02 | 2.94   | 6.63  | 6.58E-01 |
| cg00128702 | 18.78  | 7.50  | 1.23E-02 | 21.65  | 14.70 | 1.41E-01 | 15.01   | 22.07  | 4.96E-01 | 28.31   | 11.78 | 1.63E-02 | -0.35  | 16.05 | 9.82E-01 |
| cg23325364 | -16.20 | 6.47  | 1.23E-02 | -27.13 | 8.67  | 1.76E-03 | 0.38    | 16.04  | 9.81E-01 | -3.35   | 17.65 | 8.49E-01 | -12.65 | 12.37 | 3.07E-01 |
| cg07726139 | 50.46  | 20.16 | 1.23E-02 | 21.65  | 15.61 | 1.65E-01 | 74.35   | 39.45  | 5.95E-02 | 131.22  | 47.48 | 5.72E-03 | 38.48  | 26.16 | 1.41E-01 |
| cg16867023 | 26.39  | 10.54 | 1.23E-02 | 31.74  | 18.32 | 8.32E-02 | -31.57  | 37.44  | 3.99E-01 | 36.33   | 14.83 | 1.43E-02 | 14.37  | 27.28 | 5.98E-01 |
| cg02718078 | -14.29 | 5.71  | 1.23E-02 | -15.14 | 14.70 | 3.03E-01 | -51.56  | 31.22  | 9.87E-02 | -11.88  | 6.61  | 7.24E-02 | -20.19 | 21.46 | 3.47E-01 |
| cg12516621 | -35.83 | 14.32 | 1.23E-02 | -68.90 | 46.99 | 1.43E-01 | -190.90 | 191.77 | 3.20E-01 | -27.54  | 15.79 | 8.12E-02 | -72.01 | 50.74 | 1.56E-01 |
| cg05370193 | 20.72  | 8.28  | 1.23E-02 | 36.31  | 13.41 | 6.76E-03 | 18.48   | 15.93  | 2.46E-01 | 1.06    | 18.33 | 9.54E-01 | 11.53  | 21.80 | 5.97E-01 |
| cg12020794 | 24.26  | 9.70  | 1.23E-02 | 25.60  | 16.48 | 1.20E-01 | 26.35   | 17.93  | 1.42E-01 | 26.93   | 19.72 | 1.72E-01 | 9.96   | 28.00 | 7.22E-01 |
| cg15169189 | 22.95  | 9.17  | 1.23E-02 | 26.40  | 12.54 | 3.52E-02 | -0.71   | 40.20  | 9.86E-01 | 11.07   | 45.71 | 8.09E-01 | 22.59  | 15.02 | 1.33E-01 |
| cg21376908 | 20.59  | 8.23  | 1.23E-02 | 26.16  | 15.84 | 9.87E-02 | 23.92   | 17.83  | 1.80E-01 | 25.16   | 20.39 | 2.17E-01 | 12.25  | 13.82 | 3.75E-01 |
| cg13754437 | 19.99  | 7.99  | 1.23E-02 | 31.92  | 22.54 | 1.57E-01 | 1.89    | 34.13  | 9.56E-01 | 19.10   | 9.18  | 3.74E-02 | 22.71  | 32.11 | 4.80E-01 |
| cg24468070 | 10.92  | 4.36  | 1.23E-02 | 20.15  | 13.16 | 1.26E-01 | -7.47   | 15.23  | 6.24E-01 | 14.88   | 6.25  | 1.73E-02 | 6.45   | 7.71  | 4.03E-01 |
| cg07491809 | -59.25 | 23.68 | 1.23E-02 | -42.55 | 32.44 | 1.90E-01 | -70.07  | 90.04  | 4.36E-01 | -109.36 | 35.81 | 2.26E-03 | -2.05  | 50.05 | 9.67E-01 |
| cg24248367 | -14.14 | 5.65  | 1.23E-02 | -21.69 | 14.22 | 1.27E-01 | -29.32  | 25.91  | 2.58E-01 | -12.96  | 6.68  | 5.24E-02 | -0.52  | 20.21 | 9.80E-01 |
| cg00796963 | 7.98   | 3.19  | 1.24E-02 | 9.59   | 4.12  | 1.99E-02 | 7.62    | 8.02   | 3.42E-01 | 7.96    | 11.21 | 4.78E-01 | 2.37   | 7.95  | 7.66E-01 |

|            |        |       |          |         |       |          |         |        |          |        |       |          |        |       |          |
|------------|--------|-------|----------|---------|-------|----------|---------|--------|----------|--------|-------|----------|--------|-------|----------|
| cg10829227 | 19.68  | 7.86  | 1.24E-02 | 9.04    | 13.34 | 4.98E-01 | 25.22   | 13.25  | 5.71E-02 | 12.26  | 20.07 | 5.41E-01 | 39.33  | 20.53 | 5.54E-02 |
| cg12021671 | 13.73  | 5.49  | 1.24E-02 | 16.35   | 7.93  | 3.93E-02 | 7.11    | 12.26  | 5.62E-01 | 7.36   | 12.88 | 5.67E-01 | 22.65  | 14.75 | 1.25E-01 |
| cg25988204 | 9.66   | 3.86  | 1.24E-02 | 6.81    | 5.41  | 2.08E-01 | 15.83   | 9.06   | 8.06E-02 | 8.91   | 14.42 | 5.37E-01 | 11.30  | 7.94  | 1.55E-01 |
| cg14067541 | -16.91 | 6.76  | 1.24E-02 | -23.38  | 15.17 | 1.23E-01 | 6.17    | 23.81  | 7.95E-01 | -16.41 | 8.46  | 5.24E-02 | -27.64 | 23.46 | 2.39E-01 |
| cg13492337 | 16.05  | 6.42  | 1.24E-02 | 8.68    | 19.71 | 6.60E-01 | 52.30   | 28.51  | 6.66E-02 | 13.59  | 7.20  | 5.90E-02 | 34.45  | 29.03 | 2.35E-01 |
| cg05754688 | -42.17 | 16.86 | 1.24E-02 | -36.76  | 48.54 | 4.49E-01 | -15.75  | 235.35 | 9.47E-01 | -41.24 | 18.99 | 2.99E-02 | -59.86 | 57.45 | 2.97E-01 |
| cg26220061 | 27.86  | 11.14 | 1.24E-02 | 32.98   | 30.65 | 2.82E-01 | 12.95   | 102.93 | 9.00E-01 | 26.90  | 12.62 | 3.31E-02 | 31.00  | 39.99 | 4.38E-01 |
| cg14948290 | 31.37  | 12.54 | 1.24E-02 | 20.83   | 17.45 | 2.33E-01 | 5.95    | 49.78  | 9.05E-01 | 63.64  | 66.17 | 3.36E-01 | 46.76  | 20.25 | 2.09E-02 |
| cg08236767 | 11.48  | 4.59  | 1.24E-02 | 8.76    | 17.26 | 6.12E-01 | 25.38   | 31.73  | 4.24E-01 | 11.25  | 5.15  | 2.89E-02 | 12.14  | 13.52 | 3.69E-01 |
| cg06756385 | 17.07  | 6.83  | 1.24E-02 | 8.94    | 9.17  | 3.30E-01 | 20.89   | 13.30  | 1.16E-01 | 43.74  | 17.54 | 1.26E-02 | 10.92  | 15.96 | 4.94E-01 |
| cg19860160 | 12.79  | 5.12  | 1.24E-02 | 7.64    | 11.67 | 5.13E-01 | 7.40    | 16.42  | 6.52E-01 | 14.38  | 6.32  | 2.30E-02 | 21.23  | 21.55 | 3.24E-01 |
| cg09643313 | 26.43  | 10.57 | 1.24E-02 | 26.36   | 15.60 | 9.10E-02 | 29.88   | 29.89  | 3.17E-01 | 64.33  | 30.07 | 3.24E-02 | 9.05   | 19.53 | 6.43E-01 |
| cg27240008 | 45.29  | 18.11 | 1.24E-02 | 71.45   | 24.77 | 3.92E-03 | 12.71   | 59.21  | 8.30E-01 | 48.42  | 56.22 | 3.89E-01 | 3.26   | 34.99 | 9.26E-01 |
| cg00459816 | 15.00  | 6.00  | 1.24E-02 | 28.98   | 12.27 | 1.82E-02 | 17.34   | 23.81  | 4.66E-01 | 9.35   | 7.42  | 2.08E-01 | 19.51  | 28.52 | 4.94E-01 |
| cg18098089 | 18.86  | 7.54  | 1.24E-02 | 12.70   | 14.45 | 3.80E-01 | 29.93   | 18.74  | 1.10E-01 | 18.47  | 11.01 | 9.35E-02 | 19.58  | 24.33 | 4.21E-01 |
| cg23717686 | -31.73 | 12.69 | 1.24E-02 | -33.40  | 39.26 | 3.95E-01 | -235.15 | 150.57 | 1.18E-01 | -30.69 | 13.97 | 2.80E-02 | -19.66 | 50.49 | 6.97E-01 |
| cg18337963 | -38.42 | 15.37 | 1.24E-02 | -44.50  | 19.75 | 2.42E-02 | -46.51  | 66.84  | 4.87E-01 | -42.86 | 54.60 | 4.32E-01 | -21.40 | 30.02 | 4.76E-01 |
| cg07770866 | -23.06 | 9.22  | 1.24E-02 | -20.71  | 13.37 | 1.21E-01 | -28.21  | 21.17  | 1.83E-01 | -39.48 | 28.83 | 1.71E-01 | -16.41 | 19.16 | 3.92E-01 |
| cg14180479 | 25.65  | 10.26 | 1.24E-02 | 0.86    | 21.23 | 9.68E-01 | 25.29   | 22.56  | 2.62E-01 | 30.05  | 15.59 | 5.39E-02 | 56.90  | 28.83 | 4.85E-02 |
| cg19747911 | -15.42 | 6.17  | 1.24E-02 | -24.55  | 12.38 | 4.74E-02 | -2.29   | 25.84  | 9.29E-01 | -11.71 | 7.82  | 1.34E-01 | -26.30 | 22.88 | 2.50E-01 |
| cg17961932 | 22.99  | 9.20  | 1.24E-02 | 38.41   | 21.60 | 7.54E-02 | 35.86   | 34.06  | 2.92E-01 | 16.90  | 11.34 | 1.36E-01 | 26.16  | 31.05 | 4.00E-01 |
| cg16549809 | 16.76  | 6.70  | 1.24E-02 | 17.42   | 10.01 | 8.20E-02 | 19.47   | 14.04  | 1.65E-01 | 12.53  | 17.29 | 4.69E-01 | 15.14  | 16.09 | 3.47E-01 |
| cg07232642 | -8.87  | 3.55  | 1.24E-02 | -6.65   | 5.30  | 2.09E-01 | -13.11  | 8.26   | 1.13E-01 | -13.18 | 9.57  | 1.68E-01 | -7.22  | 7.40  | 3.30E-01 |
| cg08454563 | -11.97 | 4.79  | 1.24E-02 | -14.27  | 8.25  | 8.36E-02 | -3.29   | 11.77  | 7.80E-01 | -15.60 | 8.74  | 7.43E-02 | -9.79  | 10.78 | 3.64E-01 |
| cg08834573 | -12.23 | 4.89  | 1.24E-02 | -21.17  | 7.64  | 5.61E-03 | -2.53   | 11.20  | 8.21E-01 | -3.64  | 10.83 | 7.37E-01 | -11.92 | 11.07 | 2.81E-01 |
| cg05872706 | 27.24  | 10.90 | 1.24E-02 | 18.86   | 13.75 | 1.70E-01 | 9.86    | 40.32  | 8.07E-01 | 55.62  | 36.61 | 1.29E-01 | 46.39  | 23.79 | 5.12E-02 |
| cg10696445 | 17.02  | 6.81  | 1.24E-02 | 26.61   | 10.45 | 1.09E-02 | 10.67   | 13.44  | 4.27E-01 | -4.28  | 18.39 | 8.16E-01 | 19.64  | 15.98 | 2.19E-01 |
| cg23493585 | 31.42  | 12.57 | 1.24E-02 | 26.42   | 15.56 | 8.95E-02 | -18.92  | 38.95  | 6.27E-01 | 53.97  | 34.36 | 1.16E-01 | 58.77  | 28.60 | 3.99E-02 |
| cg02185464 | -12.62 | 5.05  | 1.24E-02 | -13.36  | 6.96  | 5.48E-02 | -11.77  | 22.34  | 5.98E-01 | -26.21 | 13.83 | 5.80E-02 | -5.14  | 9.39  | 5.84E-01 |
| cg20294962 | -18.80 | 7.52  | 1.25E-02 | -18.29  | 12.66 | 1.49E-01 | -3.59   | 13.12  | 7.84E-01 | -16.88 | 13.49 | 2.11E-01 | -42.54 | 15.71 | 6.78E-03 |
| cg17156255 | -47.92 | 19.18 | 1.25E-02 | -133.88 | 60.24 | 2.62E-02 | -105.28 | 258.98 | 6.84E-01 | -42.79 | 21.36 | 4.51E-02 | 8.32   | 65.02 | 8.98E-01 |
| cg19591881 | 30.34  | 12.14 | 1.25E-02 | 31.94   | 17.55 | 6.87E-02 | 40.64   | 29.98  | 1.75E-01 | 56.99  | 40.80 | 1.62E-01 | 12.43  | 23.43 | 5.96E-01 |
| cg10833037 | 18.02  | 7.21  | 1.25E-02 | 26.72   | 11.44 | 1.96E-02 | 7.65    | 21.78  | 7.25E-01 | 5.76   | 16.81 | 7.32E-01 | 17.84  | 12.97 | 1.69E-01 |
| cg23107161 | 34.31  | 13.73 | 1.25E-02 | 37.86   | 39.51 | 3.38E-01 | -52.29  | 167.54 | 7.55E-01 | 31.07  | 15.24 | 4.15E-02 | 80.05  | 55.68 | 1.50E-01 |
| cg19488158 | -10.86 | 4.35  | 1.25E-02 | -1.60   | 9.97  | 8.72E-01 | -10.04  | 12.93  | 4.38E-01 | -14.55 | 5.94  | 1.42E-02 | -10.06 | 10.81 | 3.52E-01 |

|            |        |       |          |        |       |          |        |        |          |        |       |          |        |       |          |
|------------|--------|-------|----------|--------|-------|----------|--------|--------|----------|--------|-------|----------|--------|-------|----------|
| cg00190412 | 19.75  | 7.91  | 1.25E-02 | 26.40  | 18.27 | 1.49E-01 | 23.29  | 25.03  | 3.52E-01 | 10.31  | 7.34  | 1.60E-01 | 46.23  | 18.59 | 1.29E-02 |
| cg00623826 | 29.07  | 11.64 | 1.25E-02 | 46.41  | 24.38 | 5.70E-02 | 30.43  | 47.50  | 5.22E-01 | 28.13  | 15.16 | 6.34E-02 | 0.80   | 33.17 | 9.81E-01 |
| cg08760493 | 7.79   | 3.12  | 1.25E-02 | 8.37   | 4.10  | 4.12E-02 | 14.06  | 8.73   | 1.07E-01 | 8.31   | 8.51  | 3.29E-01 | 0.22   | 7.83  | 9.78E-01 |
| cg02448597 | 39.89  | 15.97 | 1.25E-02 | 34.88  | 19.38 | 7.19E-02 | 87.66  | 85.41  | 3.05E-01 | -4.60  | 81.34 | 9.55E-01 | 53.88  | 32.13 | 9.36E-02 |
| cg25975369 | 17.92  | 7.17  | 1.25E-02 | 27.25  | 16.02 | 8.90E-02 | 22.40  | 18.22  | 2.19E-01 | 14.89  | 9.60  | 1.21E-01 | 7.78   | 24.37 | 7.49E-01 |
| cg16249340 | 17.90  | 7.17  | 1.25E-02 | 12.54  | 20.11 | 5.33E-01 | 36.75  | 37.33  | 3.25E-01 | 16.09  | 8.18  | 4.92E-02 | 38.21  | 27.50 | 1.65E-01 |
| cg05465059 | 29.60  | 11.85 | 1.25E-02 | 36.95  | 15.36 | 1.61E-02 | 50.73  | 19.45  | 9.09E-03 | 32.93  | 16.00 | 3.95E-02 | -15.78 | 23.68 | 5.05E-01 |
| cg07044006 | 21.75  | 8.71  | 1.25E-02 | 12.52  | 17.06 | 4.63E-01 | 27.63  | 16.56  | 9.51E-02 | 13.68  | 14.95 | 3.60E-01 | 50.28  | 24.81 | 4.27E-02 |
| cg17163527 | 13.30  | 5.33  | 1.25E-02 | 19.16  | 9.14  | 3.60E-02 | 18.22  | 11.98  | 1.28E-01 | 7.22   | 12.40 | 5.61E-01 | 6.69   | 10.10 | 5.08E-01 |
| cg24986572 | -49.59 | 19.86 | 1.25E-02 | -57.33 | 25.35 | 2.37E-02 | 11.66  | 59.09  | 8.44E-01 | -35.91 | 85.39 | 6.74E-01 | -62.82 | 42.41 | 1.38E-01 |
| cg06884401 | 9.67   | 3.87  | 1.25E-02 | 11.96  | 5.53  | 3.04E-02 | 7.43   | 9.49   | 4.33E-01 | 12.39  | 9.47  | 1.91E-01 | 2.76   | 9.27  | 7.66E-01 |
| cg10135854 | -21.60 | 8.65  | 1.25E-02 | -32.31 | 16.07 | 4.44E-02 | 33.90  | 40.41  | 4.01E-01 | -17.71 | 11.41 | 1.21E-01 | -40.06 | 28.74 | 1.63E-01 |
| cg22773899 | 21.96  | 8.79  | 1.25E-02 | 22.87  | 17.44 | 1.90E-01 | 25.91  | 23.59  | 2.72E-01 | 16.17  | 12.66 | 2.02E-01 | 38.12  | 24.92 | 1.26E-01 |
| cg09454925 | 19.34  | 7.74  | 1.25E-02 | 33.14  | 10.27 | 1.25E-03 | 4.17   | 16.31  | 7.98E-01 | 25.35  | 20.42 | 2.14E-01 | 6.80   | 13.31 | 6.09E-01 |
| cg11128212 | -13.89 | 5.56  | 1.25E-02 | -1.57  | 13.12 | 9.05E-01 | -10.51 | 18.26  | 5.65E-01 | -20.70 | 7.25  | 4.30E-03 | -3.21  | 14.93 | 8.30E-01 |
| cg19131103 | 34.09  | 13.65 | 1.25E-02 | 23.94  | 38.02 | 5.29E-01 | 210.05 | 156.18 | 1.79E-01 | 38.18  | 15.37 | 1.30E-02 | -9.84  | 50.05 | 8.44E-01 |
| cg13406605 | -11.46 | 4.59  | 1.25E-02 | -11.98 | 7.34  | 1.03E-01 | -4.92  | 10.97  | 6.54E-01 | -29.56 | 12.81 | 2.10E-02 | -6.94  | 8.29  | 4.02E-01 |
| cg03661817 | 7.85   | 3.14  | 1.25E-02 | 7.50   | 4.24  | 7.68E-02 | 17.50  | 6.71   | 9.15E-03 | -1.98  | 8.79  | 8.22E-01 | 5.72   | 5.64  | 3.10E-01 |
| cg05157961 | 21.00  | 8.41  | 1.25E-02 | 9.59   | 20.93 | 6.47E-01 | 37.54  | 19.21  | 5.07E-02 | 14.85  | 11.43 | 1.94E-01 | 39.91  | 25.87 | 1.23E-01 |
| cg18372136 | 13.49  | 5.40  | 1.25E-02 | 14.93  | 12.74 | 2.41E-01 | 7.22   | 18.32  | 6.93E-01 | 15.29  | 6.56  | 1.97E-02 | -3.68  | 23.06 | 8.73E-01 |
| cg26014466 | 13.17  | 5.28  | 1.25E-02 | 25.23  | 16.70 | 1.31E-01 | 14.75  | 22.66  | 5.15E-01 | 10.07  | 5.94  | 8.99E-02 | 34.13  | 22.36 | 1.27E-01 |
| cg02981663 | 16.29  | 6.52  | 1.25E-02 | 21.81  | 20.04 | 2.77E-01 | -32.43 | 42.31  | 4.43E-01 | 16.09  | 7.22  | 2.58E-02 | 29.86  | 28.09 | 2.88E-01 |
| cg13481969 | 8.12   | 3.25  | 1.25E-02 | 15.08  | 8.98  | 9.30E-02 | 13.91  | 15.85  | 3.80E-01 | 10.07  | 5.11  | 4.88E-02 | 3.50   | 5.01  | 4.85E-01 |
| cg20849025 | -11.07 | 4.44  | 1.25E-02 | -10.79 | 10.67 | 3.12E-01 | -22.79 | 21.03  | 2.79E-01 | -11.01 | 5.40  | 4.17E-02 | -7.16  | 13.43 | 5.94E-01 |
| cg00065957 | -33.57 | 13.45 | 1.25E-02 | -28.21 | 17.41 | 1.05E-01 | -33.65 | 36.87  | 3.61E-01 | -39.78 | 40.89 | 3.31E-01 | -49.04 | 33.38 | 1.42E-01 |
| cg19358349 | 25.99  | 10.41 | 1.25E-02 | 27.27  | 12.80 | 3.31E-02 | 4.39   | 44.98  | 9.22E-01 | 78.26  | 71.06 | 2.71E-01 | 22.89  | 20.29 | 2.59E-01 |
| cg03785696 | 25.45  | 10.20 | 1.26E-02 | 59.12  | 31.17 | 5.79E-02 | -52.84 | 69.93  | 4.50E-01 | 26.21  | 11.70 | 2.51E-02 | 3.12   | 30.41 | 9.18E-01 |
| cg07924575 | 10.69  | 4.28  | 1.26E-02 | 6.73   | 5.75  | 2.42E-01 | 21.96  | 11.26  | 5.13E-02 | 15.94  | 10.92 | 1.44E-01 | 9.07   | 11.18 | 4.17E-01 |
| cg13743091 | -10.11 | 4.05  | 1.26E-02 | -11.44 | 10.95 | 2.96E-01 | -7.76  | 16.67  | 6.41E-01 | -10.03 | 4.80  | 3.65E-02 | -10.26 | 13.41 | 4.44E-01 |
| cg24831725 | 18.96  | 7.60  | 1.26E-02 | 31.33  | 25.09 | 2.12E-01 | 63.89  | 78.83  | 4.18E-01 | 16.31  | 8.32  | 5.00E-02 | 29.25  | 29.83 | 3.27E-01 |
| cg02205739 | 43.10  | 17.26 | 1.26E-02 | 49.05  | 21.78 | 2.43E-02 | 8.64   | 58.69  | 8.83E-01 | -12.06 | 69.50 | 8.62E-01 | 54.94  | 36.55 | 1.33E-01 |
| cg13670601 | 14.86  | 5.95  | 1.26E-02 | -0.74  | 22.31 | 9.73E-01 | -1.71  | 66.14  | 9.79E-01 | 17.70  | 6.41  | 5.72E-03 | -6.43  | 24.98 | 7.97E-01 |
| cg13463639 | 14.99  | 6.00  | 1.26E-02 | 11.54  | 9.52  | 2.25E-01 | 22.05  | 11.62  | 5.77E-02 | 1.55   | 17.00 | 9.28E-01 | 20.51  | 13.09 | 1.17E-01 |
| cg04391232 | 21.30  | 8.54  | 1.26E-02 | 33.49  | 14.90 | 2.46E-02 | 8.87   | 16.80  | 5.98E-01 | 28.89  | 16.21 | 7.46E-02 | 0.02   | 23.14 | 9.99E-01 |
| cg27535648 | -24.92 | 9.98  | 1.26E-02 | -26.46 | 14.78 | 7.34E-02 | -46.58 | 31.03  | 1.33E-01 | -17.58 | 21.24 | 4.08E-01 | -18.87 | 21.32 | 3.76E-01 |



|            |        |       |          |        |       |          |         |        |          |        |       |          |        |       |          |
|------------|--------|-------|----------|--------|-------|----------|---------|--------|----------|--------|-------|----------|--------|-------|----------|
| cg03363633 | 14.40  | 5.77  | 1.26E-02 | 14.54  | 7.53  | 5.37E-02 | 2.04    | 13.14  | 8.76E-01 | 8.14   | 31.25 | 7.94E-01 | 27.86  | 13.35 | 3.69E-02 |
| cg26247737 | 22.72  | 9.10  | 1.26E-02 | 24.21  | 12.51 | 5.31E-02 | -17.43  | 29.23  | 5.51E-01 | 43.91  | 25.52 | 8.53E-02 | 24.38  | 18.34 | 1.84E-01 |
| cg18158419 | 12.98  | 5.20  | 1.26E-02 | 13.15  | 7.63  | 8.49E-02 | 23.94   | 13.04  | 6.64E-02 | 16.54  | 11.18 | 1.39E-01 | -3.26  | 13.02 | 8.02E-01 |
| cg25186332 | 18.67  | 7.48  | 1.26E-02 | -8.28  | 19.30 | 6.68E-01 | 23.74   | 20.83  | 2.55E-01 | 22.46  | 9.32  | 1.60E-02 | 31.18  | 27.10 | 2.50E-01 |
| cg23497678 | 9.85   | 3.95  | 1.26E-02 | 10.21  | 7.51  | 1.74E-01 | -2.30   | 17.83  | 8.98E-01 | 9.58   | 5.19  | 6.51E-02 | 16.69  | 12.73 | 1.90E-01 |
| cg04100434 | -26.05 | 10.44 | 1.26E-02 | -48.11 | 34.67 | 1.65E-01 | 16.98   | 115.20 | 8.83E-01 | -23.27 | 11.35 | 4.02E-02 | -38.96 | 44.78 | 3.84E-01 |
| cg10005475 | 9.90   | 3.97  | 1.26E-02 | 13.64  | 5.96  | 2.21E-02 | 9.28    | 7.62   | 2.23E-01 | 0.38   | 11.86 | 9.75E-01 | 7.45   | 9.51  | 4.33E-01 |
| cg04871582 | 33.45  | 13.41 | 1.26E-02 | 34.55  | 18.82 | 6.64E-02 | 42.27   | 30.12  | 1.61E-01 | 6.10   | 53.40 | 9.09E-01 | 30.96  | 27.90 | 2.67E-01 |
| cg19725343 | 26.25  | 10.52 | 1.26E-02 | 20.33  | 31.50 | 5.19E-01 | -39.23  | 85.41  | 6.46E-01 | 28.75  | 11.71 | 1.41E-02 | 20.71  | 41.04 | 6.14E-01 |
| cg19471856 | -13.76 | 5.52  | 1.26E-02 | -20.50 | 13.11 | 1.18E-01 | -4.64   | 22.23  | 8.35E-01 | -16.37 | 6.69  | 1.45E-02 | 15.45  | 19.23 | 4.22E-01 |
| cg03341377 | -8.80  | 3.53  | 1.26E-02 | -7.21  | 4.75  | 1.29E-01 | -18.17  | 8.29   | 2.83E-02 | -5.56  | 12.23 | 6.49E-01 | -5.79  | 8.27  | 4.83E-01 |
| cg18599361 | 9.36   | 3.75  | 1.26E-02 | 7.47   | 7.20  | 3.00E-01 | 12.55   | 13.43  | 3.50E-01 | 10.78  | 5.27  | 4.07E-02 | 6.17   | 9.93  | 5.34E-01 |
| cg27230711 | 29.78  | 11.94 | 1.26E-02 | 4.31   | 35.79 | 9.04E-01 | -1.13   | 98.37  | 9.91E-01 | 37.99  | 13.30 | 4.29E-03 | -19.14 | 45.79 | 6.76E-01 |
| cg03564228 | -15.72 | 6.30  | 1.26E-02 | -3.97  | 14.71 | 7.87E-01 | -58.44  | 27.19  | 3.16E-02 | -14.55 | 6.64  | 2.85E-02 | -20.99 | 19.04 | 2.70E-01 |
| cg21212076 | -6.76  | 2.71  | 1.26E-02 | -8.15  | 4.24  | 5.46E-02 | -3.91   | 5.98   | 5.13E-01 | -3.76  | 5.63  | 5.04E-01 | -11.31 | 6.88  | 1.00E-01 |
| cg27301230 | 6.93   | 2.78  | 1.26E-02 | 9.41   | 4.32  | 2.93E-02 | 6.85    | 6.65   | 3.03E-01 | 6.01   | 4.97  | 2.27E-01 | -0.43  | 8.88  | 9.62E-01 |
| cg10711778 | 11.15  | 4.47  | 1.26E-02 | 13.31  | 6.84  | 5.16E-02 | 12.35   | 9.98   | 2.16E-01 | 11.81  | 15.91 | 4.58E-01 | 6.99   | 8.27  | 3.98E-01 |
| cg26647617 | 19.73  | 7.91  | 1.26E-02 | 24.66  | 13.62 | 7.02E-02 | 3.30    | 24.77  | 8.94E-01 | 31.68  | 13.72 | 2.09E-02 | 2.32   | 16.57 | 8.88E-01 |
| cg15100501 | -21.57 | 8.65  | 1.27E-02 | -38.18 | 23.90 | 1.10E-01 | -16.63  | 36.26  | 6.46E-01 | -18.68 | 9.96  | 6.06E-02 | -26.57 | 36.19 | 4.63E-01 |
| cg20862119 | -18.29 | 7.33  | 1.27E-02 | 0.05   | 22.87 | 9.98E-01 | -15.46  | 38.99  | 6.92E-01 | -21.50 | 8.21  | 8.85E-03 | -9.30  | 29.00 | 7.48E-01 |
| cg10828561 | -12.49 | 5.01  | 1.27E-02 | -21.17 | 7.29  | 3.68E-03 | -9.29   | 11.79  | 4.31E-01 | 3.57   | 14.32 | 8.03E-01 | -6.88  | 9.90  | 4.87E-01 |
| cg02478762 | -21.73 | 8.71  | 1.27E-02 | -15.21 | 16.80 | 3.65E-01 | 19.31   | 43.21  | 6.55E-01 | -24.48 | 11.29 | 3.01E-02 | -40.62 | 28.37 | 1.52E-01 |
| cg01261351 | 13.27  | 5.32  | 1.27E-02 | 24.20  | 9.32  | 9.41E-03 | 5.15    | 12.82  | 6.88E-01 | 13.38  | 11.73 | 2.54E-01 | 5.86   | 9.79  | 5.50E-01 |
| cg00390769 | -35.85 | 14.38 | 1.27E-02 | -82.22 | 54.24 | 1.30E-01 | -319.63 | 192.40 | 9.67E-02 | -30.21 | 14.05 | 3.15E-02 | -35.73 | 51.29 | 4.86E-01 |
| cg13244522 | -13.53 | 5.43  | 1.27E-02 | -12.05 | 12.92 | 3.51E-01 | -8.46   | 29.57  | 7.75E-01 | -14.82 | 6.46  | 2.17E-02 | -7.76  | 18.88 | 6.81E-01 |
| cg04600253 | 20.86  | 8.37  | 1.27E-02 | 34.55  | 21.69 | 1.11E-01 | 13.30   | 22.42  | 5.53E-01 | 17.17  | 10.55 | 1.04E-01 | 37.00  | 29.08 | 2.03E-01 |
| cg00840257 | 28.74  | 11.53 | 1.27E-02 | 27.22  | 21.15 | 1.98E-01 | -15.32  | 51.63  | 7.67E-01 | 36.36  | 16.76 | 3.01E-02 | 23.43  | 27.19 | 3.89E-01 |
| cg17103638 | 14.54  | 5.84  | 1.27E-02 | 22.17  | 10.26 | 3.08E-02 | 32.71   | 20.87  | 1.17E-01 | 11.64  | 8.67  | 1.80E-01 | -3.09  | 15.29 | 8.40E-01 |
| cg23190164 | 8.42   | 3.38  | 1.27E-02 | 10.97  | 5.21  | 3.52E-02 | -3.91   | 9.62   | 6.85E-01 | 10.85  | 5.64  | 5.44E-02 | 4.04   | 10.88 | 7.10E-01 |
| cg00071012 | 11.15  | 4.47  | 1.27E-02 | 15.35  | 8.98  | 8.74E-02 | -3.40   | 10.40  | 7.44E-01 | 11.09  | 6.28  | 7.76E-02 | 23.10  | 11.96 | 5.34E-02 |
| cg03005087 | -11.73 | 4.71  | 1.27E-02 | -18.30 | 6.74  | 6.57E-03 | 5.03    | 12.35  | 6.84E-01 | -4.37  | 18.04 | 8.09E-01 | -10.81 | 8.62  | 2.10E-01 |
| cg19096849 | -12.11 | 4.86  | 1.27E-02 | -9.51  | 9.48  | 3.16E-01 | -10.31  | 13.15  | 4.33E-01 | -12.54 | 7.24  | 8.32E-02 | -17.02 | 12.54 | 1.75E-01 |
| cg00527307 | -13.71 | 5.50  | 1.27E-02 | -2.63  | 13.22 | 8.42E-01 | 21.36   | 30.46  | 4.83E-01 | -16.48 | 6.45  | 1.06E-02 | -29.17 | 21.16 | 1.68E-01 |
| cg03625260 | 15.63  | 6.27  | 1.27E-02 | 20.80  | 21.02 | 3.23E-01 | 5.06    | 24.27  | 8.35E-01 | 19.67  | 7.98  | 1.37E-02 | 5.71   | 13.18 | 6.65E-01 |
| cg26527263 | -9.96  | 4.00  | 1.27E-02 | -10.65 | 5.75  | 6.42E-02 | -6.64   | 9.32   | 4.76E-01 | -9.90  | 11.48 | 3.89E-01 | -11.34 | 8.70  | 1.92E-01 |

|            |        |       |          |        |       |          |        |        |          |        |       |          |        |       |          |
|------------|--------|-------|----------|--------|-------|----------|--------|--------|----------|--------|-------|----------|--------|-------|----------|
| cg25208479 | 15.58  | 6.25  | 1.27E-02 | 15.51  | 24.32 | 5.24E-01 | 96.05  | 89.09  | 2.81E-01 | 14.17  | 6.71  | 3.47E-02 | 29.43  | 25.44 | 2.47E-01 |
| cg21851282 | 11.18  | 4.49  | 1.27E-02 | 4.83   | 10.55 | 6.47E-01 | -1.05  | 12.56  | 9.33E-01 | 15.45  | 5.85  | 8.24E-03 | 13.18  | 14.10 | 3.50E-01 |
| cg19309009 | 17.09  | 6.86  | 1.27E-02 | 32.79  | 17.26 | 5.75E-02 | 9.72   | 25.61  | 7.04E-01 | 10.59  | 8.55  | 2.15E-01 | 34.73  | 19.28 | 7.16E-02 |
| cg16936094 | -8.63  | 3.46  | 1.27E-02 | -15.31 | 8.60  | 7.52E-02 | -24.12 | 17.74  | 1.74E-01 | -7.24  | 4.16  | 8.17E-02 | -1.96  | 10.60 | 8.53E-01 |
| cg03267779 | 39.23  | 15.75 | 1.27E-02 | 51.29  | 42.20 | 2.24E-01 | -48.98 | 136.90 | 7.20E-01 | 43.77  | 18.10 | 1.56E-02 | -4.75  | 52.55 | 9.28E-01 |
| cg07919131 | -18.24 | 7.32  | 1.27E-02 | -8.86  | 11.56 | 4.43E-01 | -31.99 | 20.88  | 1.25E-01 | -17.30 | 14.83 | 2.44E-01 | -28.17 | 15.21 | 6.40E-02 |
| cg26251865 | -13.35 | 5.36  | 1.27E-02 | -23.07 | 8.29  | 5.39E-03 | -6.89  | 12.54  | 5.82E-01 | 0.88   | 12.60 | 9.44E-01 | -11.96 | 11.48 | 2.98E-01 |
| cg19008320 | 16.20  | 6.51  | 1.28E-02 | 20.47  | 10.68 | 5.52E-02 | 13.44  | 13.39  | 3.15E-01 | 7.16   | 14.04 | 6.10E-01 | 21.85  | 15.42 | 1.57E-01 |
| cg09324669 | 11.89  | 4.77  | 1.28E-02 | 17.29  | 6.74  | 1.03E-02 | 12.22  | 16.17  | 4.50E-01 | 12.05  | 18.01 | 5.04E-01 | 3.83   | 8.17  | 6.39E-01 |
| cg01977519 | -12.35 | 4.96  | 1.28E-02 | -14.69 | 6.71  | 2.86E-02 | -11.56 | 12.62  | 3.60E-01 | -15.87 | 10.82 | 1.42E-01 | 8.74   | 16.52 | 5.97E-01 |
| cg23018092 | 16.90  | 6.78  | 1.28E-02 | 27.32  | 15.19 | 7.22E-02 | 29.55  | 20.79  | 1.55E-01 | 11.13  | 10.76 | 3.01E-01 | 13.07  | 12.45 | 2.94E-01 |
| cg20209754 | -45.96 | 18.45 | 1.28E-02 | -47.41 | 28.06 | 9.10E-02 | -19.75 | 57.40  | 7.31E-01 | -68.51 | 45.69 | 1.34E-01 | -40.64 | 33.64 | 2.27E-01 |
| cg22692964 | -27.27 | 10.95 | 1.28E-02 | -27.03 | 14.92 | 7.01E-02 | 6.98   | 29.65  | 8.14E-01 | -2.59  | 52.59 | 9.61E-01 | -48.08 | 20.62 | 1.97E-02 |
| cg12458913 | 17.10  | 6.87  | 1.28E-02 | 28.47  | 10.60 | 7.22E-03 | 11.60  | 17.10  | 4.97E-01 | 16.58  | 21.35 | 4.37E-01 | 4.95   | 12.23 | 6.86E-01 |
| cg07186154 | 14.60  | 5.86  | 1.28E-02 | 19.33  | 12.84 | 1.32E-01 | 3.27   | 17.81  | 8.54E-01 | 15.39  | 8.40  | 6.70E-02 | 13.87  | 13.25 | 2.95E-01 |
| cg21620968 | 20.69  | 8.31  | 1.28E-02 | 33.52  | 23.03 | 1.46E-01 | 1.85   | 37.91  | 9.61E-01 | 16.99  | 9.60  | 7.67E-02 | 48.47  | 30.90 | 1.17E-01 |
| cg19198993 | 17.43  | 7.00  | 1.28E-02 | 29.90  | 13.78 | 3.00E-02 | 6.65   | 15.72  | 6.72E-01 | 16.70  | 10.68 | 1.18E-01 | 10.70  | 20.70 | 6.05E-01 |
| cg18369866 | 21.27  | 8.54  | 1.28E-02 | 27.30  | 12.25 | 2.58E-02 | -4.36  | 26.81  | 8.71E-01 | 50.52  | 32.73 | 1.23E-01 | 14.52  | 14.57 | 3.19E-01 |
| cg03962214 | -59.52 | 23.90 | 1.28E-02 | -60.78 | 31.43 | 5.31E-02 | -10.65 | 136.05 | 9.38E-01 | -53.50 | 60.73 | 3.78E-01 | -66.78 | 49.24 | 1.75E-01 |
| cg12212206 | 25.80  | 10.36 | 1.28E-02 | 60.73  | 32.99 | 6.57E-02 | -62.79 | 121.24 | 6.05E-01 | 19.65  | 11.31 | 8.23E-02 | 68.57  | 44.13 | 1.20E-01 |
| cg06328831 | 11.56  | 4.64  | 1.28E-02 | 15.55  | 6.81  | 2.25E-02 | 11.43  | 9.60   | 2.34E-01 | 18.86  | 16.26 | 2.46E-01 | 0.59   | 9.90  | 9.53E-01 |
| cg03508504 | 16.07  | 6.46  | 1.28E-02 | 23.35  | 9.61  | 1.52E-02 | 5.75   | 15.39  | 7.08E-01 | -8.72  | 19.44 | 6.54E-01 | 20.91  | 12.59 | 9.68E-02 |
| cg24387472 | 18.31  | 7.35  | 1.28E-02 | 41.41  | 24.26 | 8.79E-02 | 25.47  | 26.74  | 3.41E-01 | 15.79  | 8.62  | 6.71E-02 | 10.40  | 22.72 | 6.47E-01 |
| cg12220663 | -10.22 | 4.11  | 1.28E-02 | -16.65 | 9.34  | 7.47E-02 | -6.94  | 13.91  | 6.18E-01 | -7.83  | 5.31  | 1.40E-01 | -14.12 | 11.78 | 2.31E-01 |
| cg03827772 | 21.66  | 8.70  | 1.28E-02 | 20.87  | 16.86 | 2.16E-01 | 13.09  | 18.59  | 4.81E-01 | 26.47  | 13.69 | 5.32E-02 | 22.98  | 26.15 | 3.80E-01 |
| cg13577149 | -12.53 | 5.03  | 1.28E-02 | -18.76 | 10.09 | 6.29E-02 | -0.87  | 17.20  | 9.59E-01 | -11.27 | 6.80  | 9.72E-02 | -13.71 | 14.73 | 3.52E-01 |
| cg03560424 | 13.21  | 5.31  | 1.28E-02 | 6.54   | 7.75  | 3.99E-01 | 24.16  | 10.34  | 1.94E-02 | 24.19  | 17.15 | 1.58E-01 | 8.53   | 12.83 | 5.06E-01 |
| cg27319536 | 6.81   | 2.74  | 1.28E-02 | 9.00   | 4.07  | 2.70E-02 | -1.54  | 7.00   | 8.26E-01 | 9.86   | 5.97  | 9.84E-02 | 4.89   | 6.36  | 4.41E-01 |
| cg04094067 | 24.21  | 9.73  | 1.28E-02 | 30.23  | 21.01 | 1.50E-01 | 21.80  | 20.52  | 2.88E-01 | 13.24  | 14.33 | 3.56E-01 | 67.12  | 30.70 | 2.88E-02 |
| cg14545570 | 12.81  | 5.15  | 1.28E-02 | 4.58   | 10.43 | 6.61E-01 | -1.82  | 15.30  | 9.05E-01 | 19.75  | 7.10  | 5.37E-03 | 12.88  | 15.02 | 3.91E-01 |
| cg17199247 | 16.51  | 6.63  | 1.28E-02 | 33.15  | 20.82 | 1.11E-01 | 11.59  | 32.93  | 7.25E-01 | 13.63  | 7.66  | 7.54E-02 | 22.62  | 20.07 | 2.60E-01 |
| cg07814707 | 10.52  | 4.23  | 1.28E-02 | 12.55  | 6.17  | 4.19E-02 | 11.90  | 10.08  | 2.38E-01 | 12.87  | 14.78 | 3.84E-01 | 5.44   | 8.09  | 5.02E-01 |
| cg20333727 | 21.73  | 8.73  | 1.28E-02 | 14.27  | 17.00 | 4.01E-01 | 16.99  | 16.14  | 2.93E-01 | 17.50  | 16.20 | 2.80E-01 | 51.64  | 22.30 | 2.06E-02 |
| cg03308839 | 5.50   | 2.21  | 1.28E-02 | 4.82   | 2.93  | 1.00E-01 | 10.11  | 5.55   | 6.88E-02 | 8.80   | 5.37  | 1.01E-01 | -3.12  | 6.83  | 6.48E-01 |
| cg20070090 | 7.33   | 2.94  | 1.28E-02 | 6.32   | 3.81  | 9.72E-02 | 14.02  | 6.82   | 3.98E-02 | 8.95   | 10.77 | 4.06E-01 | 1.94   | 7.78  | 8.03E-01 |

|            |        |       |          |        |       |          |        |        |          |        |       |          |        |       |          |
|------------|--------|-------|----------|--------|-------|----------|--------|--------|----------|--------|-------|----------|--------|-------|----------|
| cg10634403 | -8.97  | 3.60  | 1.28E-02 | -17.49 | 8.23  | 3.36E-02 | -18.66 | 15.34  | 2.24E-01 | -6.30  | 4.57  | 1.68E-01 | -5.11  | 9.96  | 6.08E-01 |
| cg12317815 | -6.56  | 2.64  | 1.28E-02 | -10.20 | 4.28  | 1.71E-02 | -1.74  | 5.52   | 7.52E-01 | -9.22  | 5.54  | 9.59E-02 | -1.17  | 6.52  | 8.57E-01 |
| cg04011707 | 22.40  | 9.00  | 1.28E-02 | 22.22  | 16.63 | 1.82E-01 | 23.24  | 14.55  | 1.10E-01 | 9.51   | 20.27 | 6.39E-01 | 40.24  | 25.23 | 1.11E-01 |
| cg06599586 | -19.45 | 7.81  | 1.28E-02 | -22.45 | 11.52 | 5.13E-02 | -4.90  | 16.94  | 7.72E-01 | -34.85 | 21.49 | 1.05E-01 | -17.79 | 17.70 | 3.15E-01 |
| cg19578305 | -15.23 | 6.12  | 1.28E-02 | -20.73 | 10.22 | 4.26E-02 | -1.11  | 16.04  | 9.45E-01 | -11.60 | 9.56  | 2.25E-01 | -33.65 | 20.93 | 1.08E-01 |
| cg03130533 | 36.99  | 14.87 | 1.28E-02 | -8.09  | 44.83 | 8.57E-01 | -62.72 | 192.63 | 7.45E-01 | 38.98  | 16.43 | 1.76E-02 | 97.32  | 58.30 | 9.51E-02 |
| cg23547017 | 26.97  | 10.84 | 1.28E-02 | 49.64  | 28.83 | 8.51E-02 | 26.72  | 42.03  | 5.25E-01 | 24.13  | 14.33 | 9.21E-02 | 19.86  | 23.11 | 3.90E-01 |
| cg11569431 | 20.86  | 8.38  | 1.28E-02 | 34.08  | 16.60 | 4.01E-02 | 9.45   | 15.21  | 5.35E-01 | 9.49   | 15.40 | 5.38E-01 | 44.72  | 22.01 | 4.22E-02 |
| cg24116317 | 12.50  | 5.02  | 1.28E-02 | 6.37   | 11.15 | 5.68E-01 | 36.30  | 21.75  | 9.51E-02 | 13.42  | 6.25  | 3.18E-02 | 6.16   | 16.04 | 7.01E-01 |
| cg21190228 | 6.38   | 2.56  | 1.28E-02 | 5.28   | 3.26  | 1.05E-01 | 13.94  | 6.70   | 3.76E-02 | 4.66   | 8.57  | 5.87E-01 | 4.50   | 6.76  | 5.05E-01 |
| cg08145373 | -8.20  | 3.30  | 1.28E-02 | -8.97  | 4.34  | 3.89E-02 | -14.00 | 8.31   | 9.22E-02 | 2.86   | 9.13  | 7.54E-01 | -8.87  | 8.94  | 3.21E-01 |
| cg18026197 | 5.43   | 2.18  | 1.28E-02 | 3.89   | 3.11  | 2.10E-01 | 1.77   | 4.55   | 6.98E-01 | 12.06  | 7.67  | 1.16E-01 | 10.88  | 4.94  | 2.75E-02 |
| cg11285834 | 10.96  | 4.41  | 1.28E-02 | 10.27  | 5.93  | 8.31E-02 | 10.87  | 9.65   | 2.60E-01 | 22.78  | 16.85 | 1.77E-01 | 8.57   | 10.66 | 4.22E-01 |
| cg04099652 | 23.93  | 9.62  | 1.29E-02 | 47.39  | 21.42 | 2.69E-02 | -20.93 | 46.70  | 6.54E-01 | 24.06  | 12.13 | 4.73E-02 | 0.99   | 27.02 | 9.71E-01 |
| cg13782932 | -22.94 | 9.22  | 1.29E-02 | -24.67 | 11.36 | 2.99E-02 | -23.96 | 31.75  | 4.50E-01 | 19.50  | 59.87 | 7.45E-01 | -21.99 | 19.09 | 2.49E-01 |
| cg18283361 | -17.84 | 7.17  | 1.29E-02 | -24.28 | 12.26 | 4.77E-02 | -5.26  | 15.16  | 7.28E-01 | -14.34 | 16.74 | 3.92E-01 | -22.86 | 14.33 | 1.11E-01 |
| cg15806588 | -11.48 | 4.62  | 1.29E-02 | -21.82 | 7.90  | 5.73E-03 | -1.75  | 11.69  | 8.81E-01 | -7.22  | 8.46  | 3.93E-01 | -7.85  | 10.21 | 4.42E-01 |
| cg12832355 | 17.28  | 6.94  | 1.29E-02 | 30.10  | 17.93 | 9.32E-02 | -15.22 | 69.85  | 8.28E-01 | 15.98  | 7.82  | 4.09E-02 | 5.77   | 30.88 | 8.52E-01 |
| cg05477024 | 21.12  | 8.49  | 1.29E-02 | 24.41  | 12.09 | 4.36E-02 | 8.06   | 20.58  | 6.95E-01 | 22.52  | 27.83 | 4.18E-01 | 23.05  | 17.19 | 1.80E-01 |
| cg01431993 | 13.78  | 5.54  | 1.29E-02 | 18.21  | 16.94 | 2.83E-01 | -15.09 | 45.09  | 7.38E-01 | 16.07  | 6.16  | 9.07E-03 | -13.62 | 21.08 | 5.18E-01 |
| cg01943813 | -18.77 | 7.54  | 1.29E-02 | -16.97 | 9.29  | 6.78E-02 | -21.14 | 18.81  | 2.61E-01 | -40.86 | 37.21 | 2.72E-01 | -18.00 | 20.26 | 3.74E-01 |
| cg22275125 | -11.17 | 4.49  | 1.29E-02 | -14.04 | 6.87  | 4.10E-02 | -4.24  | 9.56   | 6.57E-01 | -26.21 | 12.87 | 4.17E-02 | -4.53  | 9.37  | 6.29E-01 |
| cg24748448 | -18.96 | 7.62  | 1.29E-02 | -17.69 | 11.43 | 1.22E-01 | -26.60 | 18.44  | 1.49E-01 | -13.42 | 16.82 | 4.25E-01 | -21.18 | 18.03 | 2.40E-01 |
| cg04111344 | 22.44  | 9.02  | 1.29E-02 | 21.34  | 17.37 | 2.19E-01 | 83.36  | 38.65  | 3.10E-02 | 15.06  | 11.36 | 1.85E-01 | 33.92  | 27.09 | 2.11E-01 |
| cg01381170 | 18.30  | 7.36  | 1.29E-02 | 18.55  | 19.47 | 3.41E-01 | 21.24  | 30.31  | 4.83E-01 | 15.24  | 8.54  | 7.44E-02 | 55.65  | 31.27 | 7.52E-02 |
| cg01032570 | -33.26 | 13.37 | 1.29E-02 | -35.02 | 16.19 | 3.05E-02 | -71.02 | 70.48  | 3.14E-01 | -16.94 | 69.66 | 8.08E-01 | -25.23 | 27.05 | 3.51E-01 |
| cg07867367 | 7.37   | 2.96  | 1.29E-02 | 1.40   | 5.77  | 8.08E-01 | 14.74  | 7.54   | 5.07E-02 | 9.02   | 4.29  | 3.54E-02 | 3.99   | 9.19  | 6.65E-01 |
| cg01715248 | 7.68   | 3.09  | 1.29E-02 | 6.82   | 4.15  | 9.99E-02 | 4.15   | 8.15   | 6.11E-01 | 16.79  | 8.60  | 5.08E-02 | 6.56   | 7.43  | 3.78E-01 |
| cg19215677 | 26.98  | 10.85 | 1.29E-02 | 45.52  | 32.68 | 1.64E-01 | 37.27  | 155.69 | 8.11E-01 | 24.08  | 11.86 | 4.23E-02 | 34.04  | 49.69 | 4.93E-01 |
| cg07536847 | 17.62  | 7.09  | 1.29E-02 | 21.75  | 14.51 | 1.34E-01 | -21.54 | 30.57  | 4.81E-01 | 21.12  | 9.80  | 3.12E-02 | 13.80  | 16.47 | 4.02E-01 |
| cg02771673 | -11.05 | 4.45  | 1.29E-02 | -13.94 | 7.31  | 5.64E-02 | -10.60 | 11.04  | 3.37E-01 | -1.39  | 8.37  | 8.68E-01 | -20.34 | 10.31 | 4.84E-02 |
| cg23371476 | 9.21   | 3.70  | 1.29E-02 | 6.50   | 6.32  | 3.04E-01 | 15.28  | 7.81   | 5.03E-02 | 5.07   | 6.46  | 4.33E-01 | 18.21  | 11.55 | 1.15E-01 |
| cg09712135 | 17.87  | 7.19  | 1.29E-02 | 25.39  | 9.33  | 6.50E-03 | 45.66  | 36.95  | 2.16E-01 | -10.81 | 32.06 | 7.36E-01 | 5.30   | 12.64 | 6.75E-01 |
| cg18084215 | 23.73  | 9.54  | 1.29E-02 | 32.50  | 21.28 | 1.27E-01 | -24.55 | 49.08  | 6.17E-01 | 17.87  | 11.74 | 1.28E-01 | 61.34  | 29.58 | 3.81E-02 |
| cg00828556 | 6.03   | 2.42  | 1.29E-02 | 5.13   | 3.27  | 1.16E-01 | 10.56  | 4.78   | 2.71E-02 | -2.06  | 8.61  | 8.11E-01 | 5.71   | 7.19  | 4.27E-01 |

|            |        |       |          |        |       |          |         |        |          |        |       |          |        |       |          |
|------------|--------|-------|----------|--------|-------|----------|---------|--------|----------|--------|-------|----------|--------|-------|----------|
| cg20592707 | -9.26  | 3.72  | 1.29E-02 | -15.92 | 7.07  | 2.43E-02 | -4.82   | 10.81  | 6.56E-01 | -4.19  | 5.44  | 4.41E-01 | -17.00 | 10.12 | 9.29E-02 |
| cg14708940 | -10.55 | 4.24  | 1.29E-02 | -13.75 | 6.50  | 3.46E-02 | -7.28   | 8.33   | 3.82E-01 | -1.01  | 12.36 | 9.35E-01 | -13.66 | 9.57  | 1.53E-01 |
| cg15687973 | 10.96  | 4.41  | 1.29E-02 | 9.13   | 6.54  | 1.63E-01 | 12.83   | 11.52  | 2.65E-01 | 6.10   | 9.58  | 5.24E-01 | 19.43  | 10.19 | 5.64E-02 |
| cg10806146 | 8.71   | 3.50  | 1.29E-02 | 7.37   | 5.11  | 1.49E-01 | 9.08    | 6.78   | 1.80E-01 | 17.64  | 10.88 | 1.05E-01 | 6.20   | 8.77  | 4.80E-01 |
| cg23749482 | -6.70  | 2.69  | 1.29E-02 | -7.29  | 3.75  | 5.21E-02 | -11.87  | 6.56   | 7.04E-02 | -8.73  | 9.48  | 3.57E-01 | -0.98  | 5.56  | 8.60E-01 |
| cg11405655 | -11.96 | 4.81  | 1.29E-02 | -4.14  | 7.48  | 5.80E-01 | -12.39  | 12.89  | 3.37E-01 | -21.20 | 9.55  | 2.65E-02 | -16.28 | 10.96 | 1.38E-01 |
| cg07017869 | 19.03  | 7.66  | 1.29E-02 | 11.74  | 20.33 | 5.64E-01 | 52.12   | 40.15  | 1.94E-01 | 21.38  | 8.84  | 1.56E-02 | -7.76  | 28.49 | 7.85E-01 |
| cg22324022 | 29.36  | 11.82 | 1.29E-02 | 41.35  | 17.42 | 1.76E-02 | 40.57   | 39.60  | 3.06E-01 | 36.59  | 30.17 | 2.25E-01 | 3.79   | 21.65 | 8.61E-01 |
| cg02672332 | -18.18 | 7.32  | 1.29E-02 | -33.89 | 9.71  | 4.83E-04 | 1.95    | 15.50  | 9.00E-01 | -16.81 | 12.05 | 1.63E-01 | -13.04 | 11.90 | 2.73E-01 |
| cg22747516 | -10.28 | 4.14  | 1.30E-02 | -11.17 | 5.00  | 2.56E-02 | -22.57  | 8.26   | 6.27E-03 | -5.94  | 7.53  | 4.30E-01 | 0.76   | 9.31  | 9.35E-01 |
| cg15146906 | 16.66  | 6.70  | 1.30E-02 | 25.88  | 14.65 | 7.74E-02 | 67.91   | 48.11  | 1.58E-01 | 14.62  | 8.36  | 8.03E-02 | 4.08   | 18.70 | 8.27E-01 |
| cg10832005 | 29.03  | 11.68 | 1.30E-02 | 32.41  | 16.80 | 5.38E-02 | 23.51   | 31.63  | 4.57E-01 | 35.06  | 26.14 | 1.80E-01 | 17.47  | 27.50 | 5.25E-01 |
| cg13582960 | 36.40  | 14.65 | 1.30E-02 | -10.26 | 41.37 | 8.04E-01 | -117.72 | 167.40 | 4.82E-01 | 47.67  | 16.40 | 3.64E-03 | 7.72   | 55.87 | 8.90E-01 |
| cg25932290 | 7.74   | 3.12  | 1.30E-02 | 7.60   | 4.01  | 5.84E-02 | 16.66   | 7.68   | 3.01E-02 | 3.19   | 10.50 | 7.61E-01 | 0.98   | 8.20  | 9.05E-01 |
| cg18655025 | -13.96 | 5.62  | 1.30E-02 | -18.78 | 9.87  | 5.72E-02 | -11.96  | 12.65  | 3.44E-01 | -8.77  | 11.76 | 4.56E-01 | -14.04 | 11.23 | 2.11E-01 |
| cg04681472 | 16.85  | 6.78  | 1.30E-02 | -5.73  | 18.66 | 7.59E-01 | 6.35    | 41.65  | 8.79E-01 | 18.66  | 7.71  | 1.55E-02 | 44.05  | 25.94 | 8.95E-02 |
| cg02365862 | 25.35  | 10.20 | 1.30E-02 | 33.77  | 32.07 | 2.92E-01 | 19.27   | 90.20  | 8.31E-01 | 19.45  | 11.36 | 8.68E-02 | 75.93  | 36.34 | 3.66E-02 |
| cg15615022 | 12.39  | 4.98  | 1.30E-02 | 17.18  | 7.83  | 2.82E-02 | 4.42    | 8.81   | 6.16E-01 | 6.61   | 16.22 | 6.84E-01 | 18.81  | 11.75 | 1.10E-01 |
| cg01953069 | 17.40  | 7.00  | 1.30E-02 | 22.99  | 16.35 | 1.60E-01 | -7.52   | 18.60  | 6.86E-01 | 21.70  | 8.95  | 1.53E-02 | 15.36  | 28.15 | 5.85E-01 |
| cg13283199 | -5.18  | 2.09  | 1.30E-02 | -4.24  | 2.98  | 1.55E-01 | -9.17   | 4.48   | 4.05E-02 | 1.51   | 9.87  | 8.78E-01 | -4.76  | 4.18  | 2.55E-01 |
| cg03804083 | -11.92 | 4.80  | 1.30E-02 | -10.97 | 11.22 | 3.28E-01 | 0.53    | 14.78  | 9.71E-01 | -13.16 | 6.22  | 3.44E-02 | -18.26 | 14.00 | 1.92E-01 |
| cg15474755 | -12.62 | 5.08  | 1.30E-02 | -12.51 | 11.60 | 2.81E-01 | -10.48  | 22.75  | 6.45E-01 | -14.48 | 6.36  | 2.28E-02 | -3.82  | 14.64 | 7.94E-01 |
| cg02333517 | 13.80  | 5.55  | 1.30E-02 | 17.38  | 9.13  | 5.70E-02 | 9.08    | 11.43  | 4.27E-01 | 19.51  | 15.32 | 2.03E-01 | 10.13  | 10.84 | 3.50E-01 |
| cg05279387 | -15.55 | 6.26  | 1.30E-02 | -9.56  | 11.05 | 3.87E-01 | -3.49   | 12.80  | 7.85E-01 | -25.57 | 12.65 | 4.32E-02 | -27.57 | 14.16 | 5.15E-02 |
| cg23279559 | 33.79  | 13.60 | 1.30E-02 | 35.21  | 15.76 | 2.54E-02 | -43.70  | 56.26  | 4.37E-01 | 48.82  | 49.75 | 3.26E-01 | 52.98  | 38.93 | 1.74E-01 |
| cg14603539 | -15.51 | 6.24  | 1.30E-02 | -20.86 | 18.01 | 2.47E-01 | 13.94   | 26.59  | 6.00E-01 | -15.80 | 7.17  | 2.76E-02 | -27.07 | 24.27 | 2.65E-01 |
| cg15509286 | -10.01 | 4.03  | 1.30E-02 | -19.80 | 8.13  | 1.49E-02 | -6.00   | 9.82   | 5.41E-01 | -10.72 | 6.45  | 9.62E-02 | 0.30   | 9.14  | 9.74E-01 |
| cg21380024 | -8.62  | 3.47  | 1.30E-02 | -7.61  | 4.62  | 9.93E-02 | -9.05   | 8.57   | 2.91E-01 | -6.16  | 10.90 | 5.72E-01 | -12.95 | 8.38  | 1.22E-01 |
| cg15112006 | 18.52  | 7.45  | 1.30E-02 | 23.87  | 11.68 | 4.10E-02 | 6.64    | 14.49  | 6.47E-01 | 22.91  | 16.26 | 1.59E-01 | 18.83  | 21.70 | 3.86E-01 |
| cg00933859 | -10.76 | 4.33  | 1.30E-02 | -25.40 | 10.15 | 1.23E-02 | -18.37  | 15.91  | 2.48E-01 | -6.35  | 4.99  | 2.04E-01 | -8.23  | 13.32 | 5.36E-01 |
| cg03122532 | -9.95  | 4.00  | 1.30E-02 | -12.47 | 6.89  | 7.05E-02 | -6.59   | 9.01   | 4.64E-01 | -9.54  | 7.46  | 2.01E-01 | -9.54  | 9.52  | 3.16E-01 |
| cg21620139 | 6.61   | 2.66  | 1.30E-02 | 7.63   | 3.67  | 3.76E-02 | 1.50    | 6.81   | 8.25E-01 | 17.71  | 8.46  | 3.62E-02 | 2.77   | 5.65  | 6.24E-01 |
| cg25355291 | 25.49  | 10.26 | 1.30E-02 | 42.56  | 19.58 | 2.98E-02 | 5.88    | 23.90  | 8.06E-01 | 26.17  | 15.86 | 9.88E-02 | 14.39  | 29.34 | 6.24E-01 |
| cg03897452 | 7.68   | 3.09  | 1.30E-02 | 6.95   | 4.45  | 1.18E-01 | 1.12    | 8.00   | 8.89E-01 | 16.83  | 9.31  | 7.06E-02 | 8.95   | 6.11  | 1.43E-01 |
| cg25424279 | 12.95  | 5.21  | 1.30E-02 | 13.14  | 7.67  | 8.67E-02 | 13.66   | 10.43  | 1.90E-01 | 9.21   | 14.90 | 5.36E-01 | 14.10  | 12.79 | 2.70E-01 |

|            |        |       |          |        |       |          |         |        |          |         |       |          |        |       |          |
|------------|--------|-------|----------|--------|-------|----------|---------|--------|----------|---------|-------|----------|--------|-------|----------|
| cg25390413 | 11.28  | 4.54  | 1.30E-02 | 16.02  | 6.78  | 1.81E-02 | 14.56   | 9.62   | 1.30E-01 | -2.85   | 14.61 | 8.45E-01 | 4.84   | 9.43  | 6.07E-01 |
| cg06271720 | -9.67  | 3.89  | 1.30E-02 | -6.68  | 6.84  | 3.29E-01 | -8.46   | 14.13  | 5.49E-01 | -8.93   | 5.76  | 1.21E-01 | -19.36 | 10.25 | 5.90E-02 |
| cg27541604 | -9.97  | 4.01  | 1.30E-02 | -12.86 | 6.29  | 4.08E-02 | -7.11   | 9.57   | 4.57E-01 | -6.81   | 8.79  | 4.38E-01 | -9.88  | 8.79  | 2.61E-01 |
| cg00386101 | 12.95  | 5.21  | 1.30E-02 | 8.69   | 8.21  | 2.90E-01 | 21.68   | 9.35   | 2.04E-02 | 11.16   | 14.11 | 4.29E-01 | 7.92   | 13.49 | 5.57E-01 |
| cg00007324 | -63.09 | 25.40 | 1.30E-02 | -47.38 | 29.87 | 1.13E-01 | -152.62 | 166.41 | 3.59E-01 | -159.98 | 82.18 | 5.16E-02 | -63.21 | 63.88 | 3.22E-01 |
| cg01572333 | -14.48 | 5.83  | 1.30E-02 | -23.89 | 9.27  | 9.98E-03 | 5.95    | 15.44  | 7.00E-01 | -13.54  | 11.87 | 2.54E-01 | -11.85 | 12.41 | 3.40E-01 |
| cg23400056 | 22.44  | 9.04  | 1.30E-02 | 9.80   | 20.09 | 6.26E-01 | 65.17   | 50.93  | 2.01E-01 | 24.66   | 10.88 | 2.34E-02 | 18.33  | 32.71 | 5.75E-01 |
| cg19274698 | 48.41  | 19.49 | 1.30E-02 | 54.39  | 24.64 | 2.73E-02 | 30.90   | 128.21 | 8.10E-01 | -5.73   | 92.14 | 9.50E-01 | 45.42  | 35.21 | 1.97E-01 |
| cg21538208 | 7.29   | 2.93  | 1.30E-02 | 6.82   | 5.05  | 1.77E-01 | 3.11    | 6.58   | 6.36E-01 | 8.87    | 6.12  | 1.47E-01 | 9.96   | 6.07  | 1.01E-01 |
| cg22210627 | 13.19  | 5.31  | 1.30E-02 | 18.90  | 8.01  | 1.83E-02 | 12.17   | 14.78  | 4.10E-01 | 16.77   | 22.53 | 4.57E-01 | 6.33   | 8.66  | 4.65E-01 |
| cg02248749 | -10.83 | 4.36  | 1.30E-02 | -22.06 | 11.59 | 5.69E-02 | -26.78  | 17.81  | 1.33E-01 | -8.25   | 5.14  | 1.09E-01 | -2.07  | 15.52 | 8.94E-01 |
| cg01128642 | 25.15  | 10.13 | 1.30E-02 | 63.08  | 38.12 | 9.79E-02 | 63.50   | 92.30  | 4.91E-01 | 20.28   | 11.15 | 6.89E-02 | 34.65  | 33.35 | 2.99E-01 |
| cg26407316 | -12.60 | 5.07  | 1.30E-02 | -9.00  | 8.62  | 2.96E-01 | 6.10    | 18.72  | 7.44E-01 | -18.39  | 7.49  | 1.41E-02 | -12.30 | 14.63 | 4.01E-01 |
| cg03196720 | 8.07   | 3.25  | 1.30E-02 | 8.62   | 4.86  | 7.58E-02 | 11.75   | 7.50   | 1.17E-01 | 10.30   | 10.25 | 3.15E-01 | 3.66   | 6.33  | 5.63E-01 |
| cg09566995 | 7.22   | 2.91  | 1.30E-02 | 5.23   | 4.04  | 1.96E-01 | 13.91   | 6.85   | 4.23E-02 | 11.89   | 8.45  | 1.59E-01 | 3.27   | 6.75  | 6.28E-01 |
| cg03847279 | 15.09  | 6.08  | 1.30E-02 | 20.84  | 11.95 | 8.11E-02 | -2.79   | 19.62  | 8.87E-01 | 17.73   | 10.08 | 7.86E-02 | 12.49  | 11.45 | 2.75E-01 |
| cg15517098 | 22.15  | 8.92  | 1.30E-02 | 17.45  | 16.81 | 2.99E-01 | 24.60   | 17.26  | 1.54E-01 | 15.99   | 15.35 | 2.98E-01 | 46.50  | 26.53 | 7.96E-02 |
| cg06585141 | -24.83 | 10.00 | 1.30E-02 | -39.54 | 15.40 | 1.02E-02 | -11.93  | 23.68  | 6.14E-01 | -15.76  | 22.11 | 4.76E-01 | -14.32 | 22.66 | 5.27E-01 |
| cg02299465 | 20.40  | 8.22  | 1.30E-02 | 31.92  | 13.13 | 1.51E-02 | 23.81   | 15.42  | 1.23E-01 | 8.48    | 17.47 | 6.27E-01 | -7.16  | 25.57 | 7.79E-01 |
| cg05377041 | 37.93  | 15.28 | 1.30E-02 | 24.81  | 17.02 | 1.45E-01 | 56.01   | 25.45  | 2.78E-02 | -0.86   | 28.07 | 9.76E-01 | 75.12  | 26.00 | 3.86E-03 |
| cg26123532 | -10.75 | 4.33  | 1.30E-02 | -12.64 | 10.89 | 2.46E-01 | -34.22  | 23.60  | 1.47E-01 | -9.09   | 5.05  | 7.18E-02 | -12.49 | 16.00 | 4.35E-01 |
| cg16793781 | 27.44  | 11.05 | 1.30E-02 | 21.76  | 16.64 | 1.91E-01 | 23.62   | 44.70  | 5.97E-01 | 49.57   | 18.92 | 8.79E-03 | -3.32  | 27.93 | 9.05E-01 |
| cg13972124 | 24.87  | 10.02 | 1.31E-02 | 43.23  | 15.03 | 4.02E-03 | 27.50   | 31.70  | 3.86E-01 | 15.01   | 31.23 | 6.31E-01 | 5.19   | 16.38 | 7.51E-01 |
| cg12809655 | -16.67 | 6.72  | 1.31E-02 | -18.08 | 13.10 | 1.68E-01 | -15.41  | 18.29  | 4.00E-01 | -10.12  | 5.84  | 8.32E-02 | -48.53 | 18.96 | 1.05E-02 |
| cg19583655 | 10.82  | 4.36  | 1.31E-02 | 12.94  | 6.64  | 5.14E-02 | 7.80    | 9.58   | 4.16E-01 | 8.30    | 12.56 | 5.09E-01 | 10.87  | 8.85  | 2.19E-01 |
| cg08521859 | 22.62  | 9.11  | 1.31E-02 | 33.28  | 18.15 | 6.68E-02 | 7.04    | 16.03  | 6.60E-01 | 19.54   | 17.00 | 2.50E-01 | 46.28  | 24.63 | 6.02E-02 |
| cg20063640 | -14.05 | 5.66  | 1.31E-02 | -4.05  | 7.84  | 6.06E-01 | -25.52  | 11.23  | 2.31E-02 | -8.05   | 7.96  | 3.12E-01 | -26.23 | 10.15 | 9.74E-03 |
| cg26888836 | 43.99  | 17.72 | 1.31E-02 | 56.57  | 65.43 | 3.87E-01 | -319.47 | 264.86 | 2.28E-01 | 45.04   | 19.02 | 1.79E-02 | 40.03  | 76.32 | 6.00E-01 |
| cg18973735 | -12.10 | 4.87  | 1.31E-02 | 0.71   | 15.03 | 9.62E-01 | -38.33  | 23.28  | 9.97E-02 | -10.26  | 5.61  | 6.75E-02 | -25.95 | 14.53 | 7.41E-02 |
| cg20627646 | -15.07 | 6.07  | 1.31E-02 | -7.58  | 18.56 | 6.83E-01 | -6.64   | 28.23  | 8.14E-01 | -17.36  | 6.87  | 1.15E-02 | -5.91  | 23.90 | 8.05E-01 |
| cg16251357 | 18.56  | 7.48  | 1.31E-02 | 14.88  | 11.33 | 1.89E-01 | 23.14   | 19.02  | 2.24E-01 | 37.64   | 30.46 | 2.17E-01 | 17.82  | 12.65 | 1.59E-01 |
| cg20525486 | -15.83 | 6.38  | 1.31E-02 | -15.74 | 8.73  | 7.15E-02 | -10.52  | 15.77  | 5.05E-01 | 12.34   | 24.54 | 6.15E-01 | -27.87 | 13.17 | 3.43E-02 |
| cg14427527 | 20.94  | 8.44  | 1.31E-02 | 9.47   | 14.34 | 5.09E-01 | 31.49   | 15.91  | 4.78E-02 | 20.91   | 18.34 | 2.54E-01 | 27.23  | 21.05 | 1.96E-01 |
| cg22162821 | 18.57  | 7.48  | 1.31E-02 | 16.88  | 17.21 | 3.27E-01 | 28.68   | 29.10  | 3.24E-01 | 12.66   | 9.33  | 1.75E-01 | 52.49  | 23.47 | 2.53E-02 |
| cg07679219 | 3.72   | 1.50  | 1.31E-02 | 3.89   | 1.93  | 4.42E-02 | 4.27    | 3.43   | 2.13E-01 | 1.61    | 6.11  | 7.92E-01 | 3.19   | 3.92  | 4.16E-01 |

|            |        |       |          |        |       |          |         |        |          |        |       |          |        |       |          |
|------------|--------|-------|----------|--------|-------|----------|---------|--------|----------|--------|-------|----------|--------|-------|----------|
| cg10298815 | -10.79 | 4.35  | 1.31E-02 | -8.15  | 5.64  | 1.48E-01 | -18.10  | 9.51   | 5.69E-02 | 9.32   | 14.96 | 5.33E-01 | -17.74 | 8.91  | 4.64E-02 |
| cg13694867 | 20.99  | 8.46  | 1.31E-02 | 27.87  | 18.37 | 1.29E-01 | -16.79  | 40.60  | 6.79E-01 | 25.31  | 10.90 | 2.02E-02 | 3.98   | 22.40 | 8.59E-01 |
| cg03390187 | -22.49 | 9.06  | 1.31E-02 | -11.51 | 21.13 | 5.86E-01 | -48.03  | 26.44  | 6.92E-02 | -21.17 | 11.93 | 7.58E-02 | -20.64 | 26.08 | 4.29E-01 |
| cg06540578 | 13.45  | 5.42  | 1.31E-02 | 4.49   | 7.03  | 5.23E-01 | 14.40   | 8.23   | 8.00E-02 | 7.76   | 8.37  | 3.54E-01 | 29.15  | 8.48  | 5.82E-04 |
| cg18249414 | 20.08  | 8.09  | 1.31E-02 | -8.16  | 23.52 | 7.29E-01 | 14.39   | 29.32  | 6.24E-01 | 23.16  | 9.56  | 1.54E-02 | 37.80  | 27.23 | 1.65E-01 |
| cg07043025 | -23.19 | 9.35  | 1.31E-02 | -8.46  | 21.89 | 6.99E-01 | -73.19  | 46.13  | 1.13E-01 | -20.90 | 11.56 | 7.07E-02 | -40.51 | 26.64 | 1.28E-01 |
| cg05473387 | 17.70  | 7.14  | 1.31E-02 | 15.03  | 11.78 | 2.02E-01 | 15.01   | 25.79  | 5.61E-01 | 22.28  | 10.50 | 3.39E-02 | 7.95   | 23.15 | 7.31E-01 |
| cg15397374 | 16.36  | 6.60  | 1.31E-02 | 20.39  | 10.95 | 6.25E-02 | -2.33   | 18.62  | 9.00E-01 | 35.76  | 15.77 | 2.34E-02 | 9.40   | 10.98 | 3.92E-01 |
| cg07344172 | 19.32  | 7.79  | 1.31E-02 | 5.12   | 19.40 | 7.92E-01 | 59.98   | 29.00  | 3.86E-02 | 20.86  | 8.63  | 1.56E-02 | -0.72  | 26.19 | 9.78E-01 |
| cg02700472 | -17.57 | 7.08  | 1.31E-02 | -24.26 | 11.87 | 4.10E-02 | -8.03   | 36.60  | 8.26E-01 | -13.96 | 12.47 | 2.63E-01 | -14.53 | 13.28 | 2.74E-01 |
| cg14414316 | -12.43 | 5.01  | 1.31E-02 | -12.69 | 8.76  | 1.48E-01 | -9.90   | 9.94   | 3.19E-01 | -0.80  | 16.01 | 9.60E-01 | -17.69 | 8.83  | 4.52E-02 |
| cg24705960 | 15.51  | 6.25  | 1.31E-02 | 33.48  | 13.14 | 1.08E-02 | 7.96    | 21.86  | 7.16E-01 | 8.14   | 9.05  | 3.68E-01 | 15.81  | 13.51 | 2.42E-01 |
| cg12372461 | -8.11  | 3.27  | 1.31E-02 | -12.43 | 4.41  | 4.83E-03 | -1.43   | 8.70   | 8.70E-01 | -8.93  | 10.98 | 4.16E-01 | -1.29  | 6.97  | 8.53E-01 |
| cg10532048 | 44.66  | 18.01 | 1.31E-02 | 92.23  | 49.74 | 6.37E-02 | -151.38 | 204.98 | 4.60E-01 | 37.11  | 20.37 | 6.84E-02 | 59.45  | 63.76 | 3.51E-01 |
| cg19370166 | 17.43  | 7.03  | 1.31E-02 | 45.68  | 29.07 | 1.16E-01 | 75.60   | 103.67 | 4.66E-01 | 17.00  | 7.45  | 2.24E-02 | -15.59 | 32.59 | 6.33E-01 |
| cg07904926 | 25.04  | 10.10 | 1.31E-02 | 31.16  | 32.35 | 3.35E-01 | -81.85  | 130.23 | 5.30E-01 | 22.72  | 10.97 | 3.83E-02 | 65.94  | 45.47 | 1.47E-01 |
| cg07521668 | -34.79 | 14.03 | 1.31E-02 | -30.48 | 21.18 | 1.50E-01 | -8.32   | 53.22  | 8.76E-01 | -55.28 | 27.22 | 4.23E-02 | -27.25 | 29.48 | 3.55E-01 |
| cg15965815 | -14.23 | 5.74  | 1.31E-02 | -22.93 | 17.77 | 1.97E-01 | -41.84  | 38.40  | 2.76E-01 | -13.23 | 6.30  | 3.57E-02 | 1.34   | 27.07 | 9.61E-01 |
| cg24618910 | 27.35  | 11.03 | 1.31E-02 | 66.59  | 37.20 | 7.35E-02 | -113.95 | 163.64 | 4.86E-01 | 26.25  | 12.00 | 2.87E-02 | -2.42  | 43.94 | 9.56E-01 |
| cg14945696 | 25.06  | 10.10 | 1.31E-02 | 34.61  | 21.36 | 1.05E-01 | -10.27  | 48.74  | 8.33E-01 | 18.70  | 12.94 | 1.48E-01 | 51.41  | 28.75 | 7.37E-02 |
| cg15249629 | 39.11  | 15.77 | 1.31E-02 | -9.63  | 46.24 | 8.35E-01 | -0.26   | 62.70  | 9.97E-01 | 49.20  | 18.39 | 7.45E-03 | 47.81  | 54.14 | 3.77E-01 |
| cg19276540 | -41.07 | 16.56 | 1.31E-02 | -34.69 | 25.00 | 1.65E-01 | -22.29  | 49.52  | 6.53E-01 | -74.05 | 30.96 | 1.67E-02 | -13.23 | 41.01 | 7.47E-01 |
| cg25953310 | 23.24  | 9.37  | 1.31E-02 | 31.07  | 15.31 | 4.24E-02 | 28.14   | 18.05  | 1.19E-01 | 3.75   | 20.44 | 8.55E-01 | 22.18  | 24.59 | 3.67E-01 |
| cg15736553 | 22.46  | 9.06  | 1.31E-02 | 21.11  | 13.70 | 1.23E-01 | 28.42   | 18.13  | 1.17E-01 | 37.97  | 25.39 | 1.35E-01 | 7.03   | 20.99 | 7.38E-01 |
| cg19600538 | -10.79 | 4.35  | 1.32E-02 | -16.51 | 10.19 | 1.05E-01 | -13.55  | 16.87  | 4.22E-01 | -9.49  | 5.37  | 7.69E-02 | -6.80  | 14.17 | 6.31E-01 |
| cg04779720 | 24.28  | 9.79  | 1.32E-02 | 45.93  | 32.71 | 1.60E-01 | -13.69  | 108.73 | 9.00E-01 | 24.94  | 10.95 | 2.28E-02 | 3.28   | 30.52 | 9.14E-01 |
| cg18090064 | 17.88  | 7.21  | 1.32E-02 | 21.34  | 10.89 | 5.00E-02 | 25.68   | 35.91  | 4.75E-01 | 8.73   | 11.32 | 4.41E-01 | 34.16  | 21.23 | 1.08E-01 |
| cg04890237 | 22.85  | 9.21  | 1.32E-02 | 11.57  | 16.09 | 4.72E-01 | 40.73   | 17.73  | 2.16E-02 | 22.80  | 18.89 | 2.27E-01 | 16.00  | 22.74 | 4.82E-01 |
| cg05666828 | -20.96 | 8.45  | 1.32E-02 | -13.32 | 24.01 | 5.79E-01 | -112.82 | 144.52 | 4.35E-01 | -17.43 | 9.52  | 6.71E-02 | -61.48 | 29.13 | 3.48E-02 |
| cg10547761 | -12.35 | 4.98  | 1.32E-02 | -15.54 | 9.72  | 1.10E-01 | -15.63  | 15.48  | 3.13E-01 | -5.59  | 5.90  | 3.44E-01 | -30.11 | 12.80 | 1.87E-02 |
| cg03880814 | 19.35  | 7.81  | 1.32E-02 | 33.12  | 15.88 | 3.71E-02 | 17.16   | 24.02  | 4.75E-01 | 8.63   | 10.59 | 4.15E-01 | 44.37  | 23.61 | 6.02E-02 |
| cg24952224 | 17.28  | 6.97  | 1.32E-02 | 15.66  | 8.61  | 6.90E-02 | 20.93   | 20.68  | 3.12E-01 | 33.75  | 60.45 | 5.77E-01 | 19.23  | 14.92 | 1.97E-01 |
| cg24683623 | 11.38  | 4.59  | 1.32E-02 | 15.93  | 9.49  | 9.35E-02 | 5.48    | 9.49   | 5.64E-01 | 9.93   | 7.17  | 1.66E-01 | 18.91  | 13.16 | 1.51E-01 |
| cg24996491 | -9.96  | 4.02  | 1.32E-02 | -10.96 | 8.34  | 1.89E-01 | -12.20  | 14.19  | 3.90E-01 | -10.15 | 5.60  | 6.97E-02 | -7.01  | 9.69  | 4.70E-01 |
| cg00627241 | 17.52  | 7.07  | 1.32E-02 | 44.18  | 25.86 | 8.75E-02 | -61.16  | 97.87  | 5.32E-01 | 15.04  | 7.60  | 4.79E-02 | 27.48  | 29.83 | 3.57E-01 |

|            |        |       |          |        |       |          |         |        |          |        |       |          |        |       |          |
|------------|--------|-------|----------|--------|-------|----------|---------|--------|----------|--------|-------|----------|--------|-------|----------|
| cg10858746 | 27.29  | 11.01 | 1.32E-02 | 22.92  | 24.51 | 3.50E-01 | -33.61  | 61.67  | 5.86E-01 | 26.89  | 14.33 | 6.05E-02 | 44.65  | 26.24 | 8.88E-02 |
| cg16046227 | 23.01  | 9.28  | 1.32E-02 | 34.31  | 17.26 | 4.68E-02 | 9.37    | 18.46  | 6.12E-01 | 18.08  | 16.74 | 2.80E-01 | 34.35  | 23.97 | 1.52E-01 |
| cg27166718 | 19.00  | 7.67  | 1.32E-02 | 20.18  | 9.58  | 3.51E-02 | -4.07   | 27.23  | 8.81E-01 | 59.72  | 36.12 | 9.83E-02 | 15.76  | 15.83 | 3.19E-01 |
| cg07415373 | 9.55   | 3.85  | 1.32E-02 | 15.11  | 5.34  | 4.69E-03 | 3.11    | 8.04   | 6.99E-01 | -2.89  | 12.51 | 8.17E-01 | 8.05   | 9.77  | 4.10E-01 |
| cg12195820 | -28.95 | 11.68 | 1.32E-02 | -22.49 | 21.29 | 2.91E-01 | 14.49   | 46.40  | 7.55E-01 | -37.43 | 17.79 | 3.54E-02 | -34.06 | 25.83 | 1.87E-01 |
| cg03358506 | 20.90  | 8.43  | 1.32E-02 | 37.62  | 22.39 | 9.29E-02 | 31.08   | 37.40  | 4.06E-01 | 16.11  | 9.80  | 1.00E-01 | 30.56  | 32.47 | 3.47E-01 |
| cg14637649 | -9.32  | 3.76  | 1.32E-02 | -10.50 | 5.44  | 5.35E-02 | -9.94   | 9.09   | 2.74E-01 | -8.61  | 10.31 | 4.04E-01 | -6.67  | 8.07  | 4.09E-01 |
| cg22718169 | -29.11 | 11.75 | 1.32E-02 | -43.50 | 19.17 | 2.33E-02 | -10.95  | 46.28  | 8.13E-01 | -21.03 | 23.75 | 3.76E-01 | -21.96 | 20.92 | 2.94E-01 |
| cg18421360 | 22.60  | 9.12  | 1.32E-02 | 20.20  | 22.81 | 3.76E-01 | -19.76  | 55.42  | 7.21E-01 | 25.52  | 10.79 | 1.80E-02 | 16.96  | 29.08 | 5.60E-01 |
| cg07624008 | -16.12 | 6.51  | 1.32E-02 | -10.92 | 12.72 | 3.91E-01 | -11.59  | 14.66  | 4.29E-01 | -19.56 | 10.42 | 6.06E-02 | -22.21 | 16.73 | 1.84E-01 |
| cg25910261 | 6.08   | 2.45  | 1.32E-02 | 4.42   | 3.52  | 2.09E-01 | 9.21    | 6.16   | 1.35E-01 | 11.73  | 6.60  | 7.54E-02 | 3.90   | 5.28  | 4.60E-01 |
| cg19177465 | 54.65  | 22.06 | 1.32E-02 | 57.10  | 27.04 | 3.47E-02 | -76.21  | 106.81 | 4.76E-01 | 43.97  | 83.95 | 6.00E-01 | 75.70  | 46.73 | 1.05E-01 |
| cg23711554 | 12.14  | 4.90  | 1.32E-02 | 16.98  | 9.02  | 5.97E-02 | 9.75    | 17.75  | 5.83E-01 | 10.56  | 6.83  | 1.22E-01 | 8.32   | 14.55 | 5.68E-01 |
| cg01765249 | 26.37  | 10.64 | 1.32E-02 | 17.92  | 36.56 | 6.24E-01 | 195.25  | 190.09 | 3.04E-01 | 27.47  | 11.61 | 1.80E-02 | 16.05  | 39.82 | 6.87E-01 |
| cg15395971 | -10.82 | 4.37  | 1.32E-02 | -16.79 | 10.13 | 9.75E-02 | -29.72  | 20.02  | 1.38E-01 | -6.75  | 5.34  | 2.06E-01 | -18.18 | 14.02 | 1.95E-01 |
| cg18588504 | -29.71 | 11.99 | 1.32E-02 | -33.59 | 47.42 | 4.79E-01 | -92.95  | 237.74 | 6.96E-01 | -29.13 | 12.71 | 2.19E-02 | -32.18 | 57.67 | 5.77E-01 |
| cg18778433 | 15.03  | 6.07  | 1.32E-02 | 22.33  | 14.59 | 1.26E-01 | -0.15   | 19.58  | 9.94E-01 | 19.18  | 9.34  | 4.00E-02 | 9.99   | 10.92 | 3.60E-01 |
| cg04724406 | -16.58 | 6.69  | 1.32E-02 | -11.72 | 9.92  | 2.38E-01 | -1.67   | 17.03  | 9.22E-01 | -22.22 | 15.60 | 1.54E-01 | -33.42 | 14.73 | 2.33E-02 |
| cg02316156 | 16.71  | 6.74  | 1.32E-02 | 18.20  | 10.65 | 8.74E-02 | 9.61    | 13.23  | 4.67E-01 | 17.75  | 18.27 | 3.31E-01 | 22.13  | 14.97 | 1.39E-01 |
| cg06071395 | 24.24  | 9.78  | 1.32E-02 | 35.40  | 24.42 | 1.47E-01 | 78.72   | 108.93 | 4.70E-01 | 23.45  | 11.46 | 4.08E-02 | 8.15   | 30.50 | 7.89E-01 |
| cg07368443 | 15.15  | 6.11  | 1.32E-02 | 16.38  | 9.10  | 7.19E-02 | 16.96   | 15.20  | 2.65E-01 | 15.04  | 13.94 | 2.80E-01 | 10.88  | 13.88 | 4.33E-01 |
| cg09213964 | 17.55  | 7.08  | 1.33E-02 | 18.77  | 9.76  | 5.46E-02 | 26.78   | 19.32  | 1.66E-01 | -4.44  | 28.56 | 8.77E-01 | 15.63  | 13.44 | 2.45E-01 |
| cg03707183 | 8.12   | 3.28  | 1.33E-02 | 4.79   | 5.11  | 3.48E-01 | 15.64   | 8.00   | 5.07E-02 | 13.26  | 7.20  | 6.55E-02 | 3.63   | 7.09  | 6.09E-01 |
| cg11863609 | -27.80 | 11.22 | 1.33E-02 | -4.84  | 25.17 | 8.47E-01 | -53.46  | 52.14  | 3.05E-01 | -34.61 | 14.02 | 1.36E-02 | -19.16 | 33.21 | 5.64E-01 |
| cg04561791 | -11.29 | 4.56  | 1.33E-02 | -12.08 | 6.20  | 5.15E-02 | -14.31  | 10.99  | 1.93E-01 | -15.18 | 13.00 | 2.43E-01 | -2.66  | 11.23 | 8.12E-01 |
| cg21068339 | 35.41  | 14.30 | 1.33E-02 | 35.39  | 17.68 | 4.54E-02 | 13.06   | 56.23  | 8.16E-01 | 61.50  | 47.96 | 2.00E-01 | 30.94  | 32.55 | 3.42E-01 |
| cg05625559 | 12.07  | 4.87  | 1.33E-02 | 14.64  | 10.11 | 1.48E-01 | 32.83   | 22.68  | 1.48E-01 | 10.00  | 6.72  | 1.37E-01 | 9.67   | 11.03 | 3.81E-01 |
| cg22645209 | 21.08  | 8.51  | 1.33E-02 | 40.43  | 14.67 | 5.86E-03 | 21.29   | 26.79  | 4.27E-01 | 5.55   | 10.75 | 6.05E-01 | 25.60  | 14.62 | 8.00E-02 |
| cg13265740 | 9.02   | 3.64  | 1.33E-02 | 10.02  | 5.11  | 4.97E-02 | 10.54   | 11.58  | 3.63E-01 | 5.74   | 13.22 | 6.64E-01 | 7.72   | 6.48  | 2.33E-01 |
| cg00223900 | -28.45 | 11.49 | 1.33E-02 | -20.02 | 33.32 | 5.48E-01 | -71.73  | 106.76 | 5.02E-01 | -24.49 | 12.79 | 5.55E-02 | -88.08 | 46.11 | 5.61E-02 |
| cg27264484 | -43.23 | 17.46 | 1.33E-02 | -48.50 | 25.77 | 5.98E-02 | -73.04  | 50.48  | 1.48E-01 | -26.81 | 39.34 | 4.96E-01 | -30.96 | 36.85 | 4.01E-01 |
| cg05757530 | -14.05 | 5.67  | 1.33E-02 | -18.50 | 8.83  | 3.62E-02 | -13.87  | 13.28  | 2.96E-01 | -14.82 | 14.69 | 3.13E-01 | -6.55  | 11.21 | 5.59E-01 |
| cg16172043 | 24.06  | 9.72  | 1.33E-02 | 18.88  | 19.13 | 3.24E-01 | 2.29    | 20.58  | 9.11E-01 | 30.22  | 15.03 | 4.43E-02 | 59.75  | 30.54 | 5.04E-02 |
| cg27284840 | -46.82 | 18.91 | 1.33E-02 | -36.51 | 34.59 | 2.91E-01 | -300.80 | 214.66 | 1.61E-01 | -41.69 | 25.21 | 9.82E-02 | -77.51 | 52.35 | 1.39E-01 |
| cg09696747 | -10.68 | 4.31  | 1.33E-02 | -8.76  | 9.93  | 3.78E-01 | 1.60    | 19.62  | 9.35E-01 | -14.41 | 5.36  | 7.15E-03 | 2.05   | 12.73 | 8.72E-01 |

|            |        |       |          |        |       |          |        |        |          |        |       |          |        |       |          |
|------------|--------|-------|----------|--------|-------|----------|--------|--------|----------|--------|-------|----------|--------|-------|----------|
| cg26787787 | -9.10  | 3.68  | 1.33E-02 | -8.46  | 6.29  | 1.78E-01 | -7.21  | 10.62  | 4.97E-01 | -11.91 | 5.99  | 4.67E-02 | -5.31  | 9.13  | 5.61E-01 |
| cg13557752 | -16.18 | 6.53  | 1.33E-02 | -28.76 | 9.54  | 2.58E-03 | -5.85  | 12.82  | 6.48E-01 | 0.43   | 18.08 | 9.81E-01 | -13.80 | 13.06 | 2.91E-01 |
| cg08998657 | -9.70  | 3.92  | 1.33E-02 | -19.87 | 9.72  | 4.09E-02 | 0.02   | 19.93  | 9.99E-01 | -6.92  | 4.68  | 1.39E-01 | -16.54 | 12.51 | 1.86E-01 |
| cg08926365 | -20.03 | 8.09  | 1.33E-02 | -8.06  | 18.88 | 6.69E-01 | 9.63   | 48.89  | 8.44E-01 | -25.89 | 9.67  | 7.45E-03 | -7.87  | 27.13 | 7.72E-01 |
| cg20502694 | -58.45 | 23.61 | 1.33E-02 | -59.59 | 31.09 | 5.52E-02 | -48.23 | 133.53 | 7.18E-01 | -43.79 | 51.35 | 3.94E-01 | -73.72 | 55.56 | 1.85E-01 |
| cg20070618 | -13.52 | 5.46  | 1.33E-02 | -27.61 | 11.18 | 1.35E-02 | -8.31  | 20.24  | 6.81E-01 | -6.31  | 7.33  | 3.89E-01 | -21.22 | 14.98 | 1.57E-01 |
| cg18494902 | -9.50  | 3.84  | 1.33E-02 | -10.75 | 5.78  | 6.29E-02 | 1.04   | 8.47   | 9.02E-01 | -12.13 | 8.44  | 1.50E-01 | -16.72 | 9.99  | 9.42E-02 |
| cg14879760 | 14.47  | 5.85  | 1.33E-02 | 8.68   | 7.79  | 2.65E-01 | 15.81  | 14.46  | 2.74E-01 | 23.51  | 27.88 | 3.99E-01 | 26.02  | 12.21 | 3.31E-02 |
| cg03374965 | -44.51 | 17.98 | 1.33E-02 | -38.60 | 22.99 | 9.31E-02 | -22.98 | 60.17  | 7.03E-01 | -28.47 | 53.62 | 5.95E-01 | -83.93 | 41.65 | 4.39E-02 |
| cg13234732 | 31.98  | 12.92 | 1.33E-02 | 51.23  | 20.83 | 1.39E-02 | -1.20  | 32.67  | 9.71E-01 | 22.36  | 22.66 | 3.24E-01 | 38.75  | 35.32 | 2.72E-01 |
| cg21871394 | -20.62 | 8.33  | 1.33E-02 | -34.61 | 20.74 | 9.52E-02 | 26.23  | 55.80  | 6.38E-01 | -20.79 | 9.94  | 3.64E-02 | -8.85  | 24.72 | 7.21E-01 |
| cg03803086 | 10.34  | 4.18  | 1.33E-02 | 6.25   | 5.87  | 2.87E-01 | 19.59  | 8.90   | 2.77E-02 | 3.91   | 15.20 | 7.97E-01 | 13.02  | 9.42  | 1.67E-01 |
| cg04554033 | 23.48  | 9.49  | 1.33E-02 | 54.88  | 31.76 | 8.41E-02 | -9.50  | 92.32  | 9.18E-01 | 18.16  | 10.52 | 8.43E-02 | 45.29  | 32.30 | 1.61E-01 |
| cg05544007 | 31.90  | 12.89 | 1.33E-02 | 47.47  | 24.41 | 5.18E-02 | -13.16 | 58.20  | 8.21E-01 | 32.57  | 18.29 | 7.50E-02 | 17.87  | 30.74 | 5.61E-01 |
| cg12353636 | 5.66   | 2.29  | 1.33E-02 | 2.64   | 3.67  | 4.72E-01 | -0.98  | 5.94   | 8.68E-01 | 9.18   | 3.29  | 5.27E-03 | 9.00   | 5.51  | 1.02E-01 |
| cg23808213 | 10.92  | 4.41  | 1.33E-02 | 3.04   | 4.53  | 5.03E-01 | 18.40  | 7.01   | 8.71E-03 | 19.66  | 9.85  | 4.60E-02 | 10.43  | 8.41  | 2.15E-01 |
| cg21614420 | -35.16 | 14.21 | 1.33E-02 | -20.24 | 38.27 | 5.97E-01 | -89.60 | 130.27 | 4.92E-01 | -39.76 | 16.02 | 1.31E-02 | -0.59  | 56.19 | 9.92E-01 |
| cg17338133 | 14.15  | 5.72  | 1.33E-02 | 11.86  | 7.17  | 9.79E-02 | 22.23  | 17.15  | 1.95E-01 | 33.33  | 17.57 | 5.79E-02 | 4.08   | 14.98 | 7.85E-01 |
| cg12211856 | -25.83 | 10.44 | 1.33E-02 | -29.71 | 16.91 | 7.89E-02 | 6.19   | 27.61  | 8.23E-01 | -33.56 | 30.53 | 2.72E-01 | -31.93 | 17.42 | 6.68E-02 |
| cg26489057 | -10.85 | 4.39  | 1.34E-02 | -12.49 | 6.10  | 4.06E-02 | -12.37 | 9.72   | 2.03E-01 | -1.36  | 21.49 | 9.50E-01 | -7.66  | 9.01  | 3.95E-01 |
| cg19358493 | 19.36  | 7.82  | 1.34E-02 | 22.38  | 11.38 | 4.93E-02 | -9.62  | 21.84  | 6.60E-01 | 41.32  | 22.44 | 6.56E-02 | 18.00  | 14.84 | 2.25E-01 |
| cg20749283 | 23.26  | 9.40  | 1.34E-02 | 48.60  | 25.09 | 5.27E-02 | -12.95 | 64.28  | 8.40E-01 | 19.67  | 10.73 | 6.68E-02 | 22.74  | 35.11 | 5.17E-01 |
| cg15648958 | 31.19  | 12.61 | 1.34E-02 | 30.20  | 18.27 | 9.84E-02 | 55.77  | 25.83  | 3.08E-02 | -30.31 | 42.63 | 4.77E-01 | 31.17  | 28.32 | 2.71E-01 |
| cg04928670 | 11.59  | 4.68  | 1.34E-02 | 9.15   | 7.26  | 2.07E-01 | 6.15   | 9.41   | 5.13E-01 | 27.93  | 11.38 | 1.41E-02 | 9.13   | 11.48 | 4.26E-01 |
| cg04102427 | 20.48  | 8.28  | 1.34E-02 | 28.64  | 14.71 | 5.15E-02 | 11.83  | 38.59  | 7.59E-01 | 13.13  | 11.51 | 2.54E-01 | 33.93  | 23.90 | 1.56E-01 |
| cg18120376 | 26.85  | 10.85 | 1.34E-02 | 35.70  | 23.11 | 1.22E-01 | 33.73  | 57.69  | 5.59E-01 | 21.29  | 13.61 | 1.18E-01 | 39.30  | 33.06 | 2.34E-01 |
| cg22882539 | 15.16  | 6.13  | 1.34E-02 | 17.81  | 23.97 | 4.57E-01 | 97.77  | 79.37  | 2.18E-01 | 14.13  | 6.52  | 3.02E-02 | 20.89  | 29.27 | 4.75E-01 |
| cg03300883 | 15.32  | 6.19  | 1.34E-02 | -2.79  | 19.33 | 8.85E-01 | 25.88  | 27.52  | 3.47E-01 | 18.07  | 6.97  | 9.49E-03 | 0.19   | 26.18 | 9.94E-01 |
| cg23216724 | 6.02   | 2.43  | 1.34E-02 | 3.63   | 3.87  | 3.48E-01 | 11.33  | 4.60   | 1.37E-02 | 5.80   | 5.12  | 2.57E-01 | 0.96   | 7.77  | 9.02E-01 |
| cg13071386 | 15.23  | 6.16  | 1.34E-02 | 32.65  | 11.88 | 6.00E-03 | 5.97   | 13.67  | 6.62E-01 | 8.99   | 14.18 | 5.26E-01 | 10.48  | 10.52 | 3.19E-01 |
| cg07135032 | 11.64  | 4.70  | 1.34E-02 | 20.49  | 9.22  | 2.62E-02 | 8.48   | 11.97  | 4.79E-01 | 8.99   | 8.81  | 3.08E-01 | 8.09   | 8.59  | 3.47E-01 |
| cg23312086 | 16.83  | 6.81  | 1.34E-02 | 5.90   | 10.20 | 5.63E-01 | 35.92  | 13.30  | 6.91E-03 | 21.45  | 11.70 | 6.68E-02 | 7.75   | 14.11 | 5.83E-01 |
| cg21302951 | 14.06  | 5.68  | 1.34E-02 | 14.16  | 8.21  | 8.44E-02 | 27.11  | 16.34  | 9.71E-02 | 33.14  | 18.25 | 6.94E-02 | 2.55   | 10.34 | 8.05E-01 |
| cg07217630 | 43.41  | 17.56 | 1.34E-02 | 73.49  | 35.24 | 3.70E-02 | -31.76 | 158.02 | 8.41E-01 | 43.69  | 22.04 | 4.75E-02 | -20.35 | 54.11 | 7.07E-01 |
| cg23804585 | 21.72  | 8.78  | 1.34E-02 | 40.68  | 16.92 | 1.62E-02 | 7.10   | 31.92  | 8.24E-01 | 19.32  | 11.88 | 1.04E-01 | -3.26  | 26.77 | 9.03E-01 |



|            |        |       |          |        |       |          |        |        |          |        |       |          |        |       |          |
|------------|--------|-------|----------|--------|-------|----------|--------|--------|----------|--------|-------|----------|--------|-------|----------|
| cg24166628 | 22.68  | 9.17  | 1.34E-02 | 38.19  | 18.75 | 4.17E-02 | 13.70  | 17.04  | 4.21E-01 | 14.03  | 18.37 | 4.45E-01 | 27.41  | 19.49 | 1.60E-01 |
| cg17952467 | 15.57  | 6.30  | 1.34E-02 | 23.02  | 16.25 | 1.56E-01 | 33.50  | 29.20  | 2.51E-01 | 17.06  | 7.37  | 2.06E-02 | -15.90 | 20.35 | 4.35E-01 |
| cg00978117 | 26.31  | 10.64 | 1.34E-02 | 19.75  | 20.02 | 3.24E-01 | 19.89  | 54.10  | 7.13E-01 | 26.04  | 14.42 | 7.09E-02 | 43.14  | 29.07 | 1.38E-01 |
| cg11490987 | 34.07  | 13.78 | 1.34E-02 | 23.15  | 31.51 | 4.63E-01 | -2.46  | 109.46 | 9.82E-01 | 46.77  | 16.60 | 4.83E-03 | -24.53 | 42.75 | 5.66E-01 |
| cg26968544 | -9.24  | 3.74  | 1.34E-02 | -13.89 | 7.15  | 5.20E-02 | -15.38 | 12.32  | 2.12E-01 | -6.29  | 5.32  | 2.38E-01 | -6.54  | 9.89  | 5.08E-01 |
| cg23510527 | -15.54 | 6.29  | 1.34E-02 | -27.65 | 22.32 | 2.15E-01 | 22.72  | 38.65  | 5.57E-01 | -13.89 | 6.92  | 4.49E-02 | -35.79 | 23.76 | 1.32E-01 |
| cg14746387 | 7.68   | 3.11  | 1.34E-02 | 6.83   | 4.05  | 9.19E-02 | 8.72   | 7.23   | 2.28E-01 | 16.75  | 11.04 | 1.29E-01 | 4.90   | 8.05  | 5.42E-01 |
| cg02153855 | 8.75   | 3.54  | 1.34E-02 | 4.33   | 4.79  | 3.66E-01 | 14.83  | 7.17   | 3.85E-02 | 20.26  | 14.90 | 1.74E-01 | 10.57  | 9.03  | 2.42E-01 |
| cg07326149 | -11.55 | 4.67  | 1.34E-02 | -22.18 | 11.91 | 6.25E-02 | -1.38  | 16.31  | 9.33E-01 | -9.68  | 5.70  | 8.97E-02 | -16.42 | 15.32 | 2.84E-01 |
| cg00528902 | 18.39  | 7.44  | 1.34E-02 | 17.89  | 8.72  | 4.01E-02 | 25.17  | 35.14  | 4.74E-01 | -36.41 | 50.70 | 4.73E-01 | 24.36  | 16.38 | 1.37E-01 |
| cg03345037 | 17.69  | 7.15  | 1.34E-02 | 16.21  | 9.40  | 8.47E-02 | 38.46  | 25.23  | 1.27E-01 | 40.64  | 47.74 | 3.95E-01 | 13.50  | 12.69 | 2.87E-01 |
| cg01371233 | 18.94  | 7.66  | 1.34E-02 | 30.90  | 14.28 | 3.05E-02 | 31.59  | 33.28  | 3.42E-01 | 12.38  | 10.16 | 2.23E-01 | 14.77  | 25.54 | 5.63E-01 |
| cg14073497 | 27.07  | 10.95 | 1.34E-02 | 40.36  | 30.45 | 1.85E-01 | -44.34 | 156.15 | 7.76E-01 | 21.44  | 12.29 | 8.10E-02 | 70.66  | 41.02 | 8.50E-02 |
| cg19017293 | 12.09  | 4.89  | 1.34E-02 | 14.22  | 6.72  | 3.45E-02 | 6.39   | 9.70   | 5.10E-01 | 28.81  | 19.79 | 1.45E-01 | 7.60   | 12.43 | 5.41E-01 |
| cg25800638 | 7.61   | 3.08  | 1.34E-02 | 6.94   | 4.36  | 1.11E-01 | 9.71   | 5.61   | 8.38E-02 | 20.29  | 12.34 | 1.00E-01 | -0.29  | 8.32  | 9.72E-01 |
| cg18637901 | 17.28  | 6.99  | 1.35E-02 | 15.30  | 10.01 | 1.26E-01 | 14.00  | 14.26  | 3.26E-01 | 20.16  | 23.22 | 3.85E-01 | 25.53  | 16.44 | 1.20E-01 |
| cg21554569 | -15.05 | 6.09  | 1.35E-02 | -12.26 | 13.12 | 3.50E-01 | 8.27   | 16.69  | 6.20E-01 | -20.17 | 8.20  | 1.39E-02 | -23.99 | 19.38 | 2.16E-01 |
| cg25945642 | 6.39   | 2.58  | 1.35E-02 | 7.86   | 3.52  | 2.56E-02 | 4.83   | 5.84   | 4.09E-01 | 11.75  | 8.30  | 1.57E-01 | 0.40   | 6.30  | 9.49E-01 |
| cg23405198 | 19.83  | 8.02  | 1.35E-02 | 19.82  | 21.07 | 3.47E-01 | -17.87 | 29.27  | 5.42E-01 | 25.55  | 9.57  | 7.61E-03 | 4.52   | 28.77 | 8.75E-01 |
| cg07038400 | 9.63   | 3.90  | 1.35E-02 | 16.67  | 6.37  | 8.94E-03 | 2.07   | 7.63   | 7.86E-01 | 2.77   | 8.78  | 7.52E-01 | 13.75  | 9.49  | 1.48E-01 |
| cg15520279 | 17.04  | 6.89  | 1.35E-02 | 23.78  | 13.47 | 7.75E-02 | 21.37  | 18.07  | 2.37E-01 | 11.02  | 17.14 | 5.20E-01 | 13.74  | 10.51 | 1.91E-01 |
| cg15830591 | 8.17   | 3.31  | 1.35E-02 | 3.52   | 7.02  | 6.16E-01 | 19.30  | 7.85   | 1.40E-02 | 5.40   | 4.98  | 2.78E-01 | 9.90   | 8.24  | 2.30E-01 |
| cg14354168 | 6.14   | 2.49  | 1.35E-02 | 6.16   | 3.57  | 8.50E-02 | 7.68   | 5.45   | 1.59E-01 | 6.22   | 7.97  | 4.35E-01 | 4.56   | 5.41  | 3.99E-01 |
| cg14223966 | 4.74   | 1.92  | 1.35E-02 | 4.32   | 3.15  | 1.69E-01 | 6.06   | 4.21   | 1.50E-01 | 9.56   | 4.27  | 2.50E-02 | -0.26  | 4.10  | 9.50E-01 |
| cg07478501 | 22.71  | 9.19  | 1.35E-02 | 33.80  | 16.70 | 4.30E-02 | 12.08  | 16.64  | 4.68E-01 | 16.43  | 18.97 | 3.86E-01 | 31.32  | 23.15 | 1.76E-01 |
| cg21841024 | 25.41  | 10.28 | 1.35E-02 | 34.93  | 20.23 | 8.42E-02 | 39.89  | 19.95  | 4.55E-02 | 2.85   | 16.06 | 8.59E-01 | 44.32  | 27.88 | 1.12E-01 |
| cg17101285 | 18.17  | 7.36  | 1.35E-02 | 19.27  | 11.36 | 8.96E-02 | 18.33  | 14.15  | 1.95E-01 | 31.71  | 19.46 | 1.03E-01 | 3.62   | 17.97 | 8.40E-01 |
| cg04101116 | 15.18  | 6.15  | 1.35E-02 | 9.64   | 19.93 | 6.29E-01 | 13.37  | 36.05  | 7.11E-01 | 15.17  | 6.76  | 2.49E-02 | 26.97  | 27.40 | 3.25E-01 |
| cg03228555 | -8.89  | 3.60  | 1.35E-02 | -11.43 | 8.74  | 1.91E-01 | -10.60 | 18.89  | 5.75E-01 | -7.27  | 4.35  | 9.47E-02 | -14.52 | 10.85 | 1.81E-01 |
| cg18836485 | -12.76 | 5.16  | 1.35E-02 | -14.02 | 14.29 | 3.27E-01 | -29.61 | 27.01  | 2.73E-01 | -13.77 | 5.94  | 2.03E-02 | 7.50   | 18.67 | 6.88E-01 |
| cg19804488 | 13.98  | 5.66  | 1.35E-02 | 6.87   | 8.00  | 3.91E-01 | 23.50  | 12.50  | 6.02E-02 | 25.28  | 16.41 | 1.24E-01 | 15.55  | 13.52 | 2.50E-01 |
| cg01165177 | 18.87  | 7.64  | 1.35E-02 | 0.66   | 19.46 | 9.73E-01 | 46.09  | 19.43  | 1.77E-02 | 16.32  | 9.68  | 9.16E-02 | 21.63  | 29.24 | 4.60E-01 |
| cg10404399 | 16.28  | 6.59  | 1.35E-02 | 33.74  | 16.03 | 3.53E-02 | 28.36  | 27.20  | 2.97E-01 | 10.81  | 7.72  | 1.61E-01 | 24.01  | 31.81 | 4.50E-01 |
| cg02132946 | -11.19 | 4.53  | 1.35E-02 | -13.57 | 6.61  | 4.01E-02 | -15.91 | 10.34  | 1.24E-01 | -3.66  | 13.79 | 7.91E-01 | -5.94  | 9.44  | 5.29E-01 |
| cg08245249 | -13.68 | 5.54  | 1.35E-02 | -17.27 | 11.23 | 1.24E-01 | 3.44   | 13.09  | 7.93E-01 | -14.54 | 8.07  | 7.16E-02 | -30.30 | 16.91 | 7.31E-02 |

|            |        |       |          |        |       |          |         |        |          |        |       |          |        |       |          |
|------------|--------|-------|----------|--------|-------|----------|---------|--------|----------|--------|-------|----------|--------|-------|----------|
| cg02175033 | 6.56   | 2.66  | 1.35E-02 | 7.03   | 3.32  | 3.43E-02 | 10.52   | 6.35   | 9.78E-02 | 5.18   | 10.66 | 6.27E-01 | -0.76  | 7.56  | 9.20E-01 |
| cg03119532 | -18.58 | 7.52  | 1.35E-02 | -13.12 | 15.61 | 4.01E-01 | -4.46   | 49.12  | 9.28E-01 | -21.28 | 9.48  | 2.47E-02 | -17.70 | 22.24 | 4.26E-01 |
| cg04625338 | -9.53  | 3.86  | 1.35E-02 | -12.67 | 5.70  | 2.63E-02 | -0.45   | 11.45  | 9.68E-01 | -13.39 | 10.54 | 2.04E-01 | -6.39  | 7.09  | 3.68E-01 |
| cg11850861 | -12.45 | 5.04  | 1.35E-02 | -15.32 | 7.18  | 3.28E-02 | -15.72  | 12.14  | 1.95E-01 | 9.02   | 15.27 | 5.55E-01 | -14.04 | 10.60 | 1.85E-01 |
| cg06162030 | 11.97  | 4.85  | 1.35E-02 | 14.61  | 6.22  | 1.88E-02 | 21.49   | 13.46  | 1.10E-01 | 5.77   | 13.12 | 6.60E-01 | -3.77  | 13.63 | 7.82E-01 |
| cg02867514 | -12.34 | 4.99  | 1.35E-02 | -12.54 | 8.05  | 1.19E-01 | -10.05  | 13.08  | 4.43E-01 | -7.63  | 9.88  | 4.40E-01 | -19.16 | 10.81 | 7.63E-02 |
| cg01159623 | 27.37  | 11.08 | 1.35E-02 | 38.84  | 20.24 | 5.50E-02 | -9.14   | 23.88  | 7.02E-01 | 25.69  | 17.41 | 1.40E-01 | 47.25  | 21.39 | 2.72E-02 |
| cg02613601 | -17.09 | 6.92  | 1.35E-02 | -16.94 | 11.48 | 1.40E-01 | -1.08   | 14.11  | 9.39E-01 | -26.47 | 17.11 | 1.22E-01 | -27.21 | 14.32 | 5.74E-02 |
| cg12724221 | 11.05  | 4.48  | 1.35E-02 | 13.66  | 6.22  | 2.81E-02 | 10.33   | 10.72  | 3.35E-01 | 11.10  | 11.17 | 3.20E-01 | 2.73   | 11.65 | 8.15E-01 |
| cg13216331 | 6.35   | 2.57  | 1.35E-02 | 6.89   | 3.63  | 5.78E-02 | 6.06    | 6.71   | 3.66E-01 | 6.16   | 5.25  | 2.40E-01 | 4.71   | 7.69  | 5.40E-01 |
| cg16582156 | -61.46 | 24.88 | 1.35E-02 | -44.81 | 62.56 | 4.74E-01 | -534.60 | 274.20 | 5.12E-02 | -61.88 | 26.69 | 2.04E-02 | -45.30 | 77.02 | 5.56E-01 |
| cg24613798 | -20.21 | 8.18  | 1.35E-02 | -35.63 | 16.98 | 3.58E-02 | -22.63  | 18.88  | 2.31E-01 | -7.89  | 12.38 | 5.24E-01 | -29.71 | 21.70 | 1.71E-01 |
| cg05176211 | 17.70  | 7.17  | 1.35E-02 | 18.72  | 11.09 | 9.14E-02 | 20.39   | 16.01  | 2.03E-01 | 0.78   | 19.12 | 9.67E-01 | 23.57  | 14.60 | 1.07E-01 |
| cg24786875 | 7.00   | 2.84  | 1.35E-02 | 6.18   | 3.76  | 1.00E-01 | 13.73   | 7.65   | 7.27E-02 | 6.78   | 7.23  | 3.49E-01 | 3.99   | 7.62  | 6.01E-01 |
| cg10001720 | 4.57   | 1.85  | 1.35E-02 | 6.58   | 2.33  | 4.71E-03 | 0.08    | 4.15   | 9.85E-01 | -1.02  | 8.77  | 9.07E-01 | 3.55   | 5.23  | 4.98E-01 |
| cg15275019 | -29.68 | 12.02 | 1.35E-02 | -44.06 | 36.54 | 2.28E-01 | 52.28   | 132.11 | 6.92E-01 | -25.88 | 13.39 | 5.33E-02 | -57.70 | 43.05 | 1.80E-01 |
| cg18246262 | 23.44  | 9.49  | 1.35E-02 | 49.22  | 21.16 | 2.00E-02 | -4.99   | 49.61  | 9.20E-01 | 16.47  | 11.72 | 1.60E-01 | 27.57  | 29.28 | 3.46E-01 |
| cg07716287 | 16.94  | 6.86  | 1.35E-02 | 22.44  | 15.36 | 1.44E-01 | 16.75   | 18.39  | 3.62E-01 | 18.23  | 9.02  | 4.33E-02 | -4.89  | 23.78 | 8.37E-01 |
| cg16113793 | -34.37 | 13.92 | 1.35E-02 | -35.98 | 18.53 | 5.21E-02 | -32.46  | 38.04  | 3.93E-01 | 5.78   | 44.78 | 8.97E-01 | -50.09 | 30.74 | 1.03E-01 |
| cg04510564 | -13.60 | 5.51  | 1.35E-02 | -10.80 | 13.47 | 4.23E-01 | -14.84  | 27.47  | 5.89E-01 | -11.95 | 6.57  | 6.89E-02 | -31.09 | 18.35 | 9.03E-02 |
| cg23120848 | -43.17 | 17.48 | 1.35E-02 | -51.59 | 20.36 | 1.13E-02 | -68.15  | 80.11  | 3.95E-01 | 20.44  | 71.38 | 7.75E-01 | -20.00 | 44.42 | 6.53E-01 |
| cg09767598 | 23.68  | 9.59  | 1.36E-02 | 40.98  | 22.65 | 7.04E-02 | 29.19   | 53.73  | 5.87E-01 | 16.47  | 12.06 | 1.72E-01 | 31.95  | 24.31 | 1.89E-01 |
| cg01553209 | 39.09  | 15.83 | 1.36E-02 | 44.33  | 21.57 | 3.99E-02 | -28.49  | 84.62  | 7.36E-01 | 115.63 | 61.40 | 5.97E-02 | 23.68  | 26.39 | 3.70E-01 |
| cg17869514 | 19.66  | 7.96  | 1.36E-02 | 24.42  | 10.86 | 2.46E-02 | 41.17   | 20.28  | 4.24E-02 | 23.29  | 17.47 | 1.82E-01 | -0.76  | 13.83 | 9.56E-01 |
| cg26751372 | 20.43  | 8.28  | 1.36E-02 | 16.81  | 21.58 | 4.36E-01 | -5.83   | 43.40  | 8.93E-01 | 23.27  | 9.53  | 1.46E-02 | 9.95   | 33.10 | 7.64E-01 |
| cg14566857 | -41.36 | 16.76 | 1.36E-02 | -35.07 | 46.62 | 4.52E-01 | -240.95 | 186.45 | 1.96E-01 | -38.08 | 19.24 | 4.78E-02 | -57.63 | 51.92 | 2.67E-01 |
| cg19210349 | -20.83 | 8.44  | 1.36E-02 | 7.58   | 21.94 | 7.30E-01 | -47.32  | 42.33  | 2.64E-01 | -21.94 | 9.99  | 2.81E-02 | -44.61 | 26.80 | 9.60E-02 |
| cg00718409 | -11.57 | 4.69  | 1.36E-02 | -10.78 | 9.42  | 2.52E-01 | 3.95    | 21.00  | 8.51E-01 | -12.80 | 6.30  | 4.24E-02 | -13.55 | 12.15 | 2.65E-01 |
| cg20942219 | 25.75  | 10.43 | 1.36E-02 | 23.73  | 20.45 | 2.46E-01 | 36.58   | 23.73  | 1.23E-01 | 12.61  | 16.15 | 4.35E-01 | 56.15  | 29.05 | 5.33E-02 |
| cg00551910 | 8.12   | 3.29  | 1.36E-02 | 7.08   | 4.76  | 1.36E-01 | 8.45    | 7.84   | 2.81E-01 | 15.36  | 8.00  | 5.50E-02 | 3.68   | 7.84  | 6.39E-01 |
| cg13474450 | 7.33   | 2.97  | 1.36E-02 | 7.30   | 3.77  | 5.29E-02 | 9.37    | 7.60   | 2.17E-01 | 7.20   | 9.22  | 4.34E-01 | 5.04   | 8.44  | 5.50E-01 |
| cg08517286 | 16.71  | 6.77  | 1.36E-02 | 50.48  | 26.75 | 5.92E-02 | -31.98  | 48.65  | 5.11E-01 | 14.82  | 8.08  | 6.66E-02 | 17.22  | 14.63 | 2.39E-01 |
| cg05171937 | 5.35   | 2.17  | 1.36E-02 | 6.16   | 2.90  | 3.34E-02 | 8.67    | 6.34   | 1.71E-01 | 6.63   | 4.97  | 1.83E-01 | -2.78  | 5.93  | 6.39E-01 |
| cg00109764 | 11.91  | 4.83  | 1.36E-02 | 7.38   | 6.93  | 2.87E-01 | 27.85   | 11.45  | 1.50E-02 | 5.67   | 11.66 | 6.27E-01 | 14.50  | 11.81 | 2.20E-01 |
| cg25666403 | -36.58 | 14.82 | 1.36E-02 | -40.01 | 34.22 | 2.42E-01 | -141.72 | 169.30 | 4.03E-01 | -43.83 | 18.10 | 1.54E-02 | 10.54  | 40.49 | 7.95E-01 |

|            |        |       |          |        |       |          |         |        |          |        |       |          |        |       |          |
|------------|--------|-------|----------|--------|-------|----------|---------|--------|----------|--------|-------|----------|--------|-------|----------|
| cg22314482 | 15.80  | 6.40  | 1.36E-02 | 5.19   | 15.54 | 7.38E-01 | 23.01   | 58.59  | 6.95E-01 | 19.11  | 7.43  | 1.01E-02 | 6.01   | 23.30 | 7.97E-01 |
| cg02566775 | 6.95   | 2.82  | 1.36E-02 | 6.02   | 3.68  | 1.01E-01 | 12.90   | 7.21   | 7.36E-02 | 11.61  | 7.66  | 1.30E-01 | -0.97  | 7.94  | 9.03E-01 |
| cg06659580 | 39.16  | 15.87 | 1.36E-02 | -27.64 | 52.77 | 6.00E-01 | -182.92 | 225.22 | 4.17E-01 | 49.51  | 17.62 | 4.96E-03 | 25.78  | 51.87 | 6.19E-01 |
| cg18622538 | -9.96  | 4.03  | 1.36E-02 | -8.87  | 4.71  | 5.93E-02 | -8.76   | 8.72   | 3.15E-01 | -29.17 | 11.12 | 8.72E-03 | -3.85  | 6.99  | 5.82E-01 |
| cg09588360 | -39.95 | 16.19 | 1.36E-02 | -41.22 | 19.21 | 3.19E-02 | 16.00   | 60.26  | 7.91E-01 | -50.02 | 56.40 | 3.75E-01 | -57.05 | 44.08 | 1.96E-01 |
| cg04766371 | 24.08  | 9.76  | 1.36E-02 | 18.08  | 18.05 | 3.16E-01 | 67.15   | 29.84  | 2.44E-02 | 26.00  | 32.19 | 4.19E-01 | 18.13  | 13.69 | 1.85E-01 |
| cg06100570 | -13.03 | 5.28  | 1.36E-02 | -2.67  | 17.28 | 8.77E-01 | -18.71  | 31.79  | 5.56E-01 | -14.67 | 5.88  | 1.26E-02 | -6.05  | 19.46 | 7.56E-01 |
| cg27528660 | 19.13  | 7.75  | 1.36E-02 | 37.36  | 22.48 | 9.65E-02 | 27.45   | 39.78  | 4.90E-01 | 16.90  | 9.39  | 7.18E-02 | 13.13  | 19.28 | 4.96E-01 |
| cg05471296 | 35.49  | 14.38 | 1.36E-02 | 21.13  | 20.96 | 3.13E-01 | -1.18   | 58.87  | 9.84E-01 | 69.90  | 44.04 | 1.12E-01 | 50.04  | 23.88 | 3.61E-02 |
| cg01821022 | 6.33   | 2.57  | 1.36E-02 | 6.65   | 3.64  | 6.74E-02 | 7.72    | 6.04   | 2.02E-01 | 1.74   | 5.85  | 7.66E-01 | 10.04  | 7.16  | 1.61E-01 |
| cg18865075 | -13.34 | 5.41  | 1.36E-02 | -10.03 | 10.22 | 3.27E-01 | 6.39    | 16.98  | 7.06E-01 | -16.38 | 7.90  | 3.80E-02 | -23.31 | 13.95 | 9.47E-02 |
| cg09282201 | -17.47 | 7.08  | 1.36E-02 | -5.70  | 19.30 | 7.68E-01 | -10.94  | 32.19  | 7.34E-01 | -18.13 | 8.14  | 2.60E-02 | -40.81 | 28.85 | 1.57E-01 |
| cg20847228 | -39.23 | 15.90 | 1.36E-02 | -46.75 | 23.56 | 4.73E-02 | 71.58   | 73.72  | 3.32E-01 | -41.06 | 27.84 | 1.40E-01 | -45.81 | 38.33 | 2.32E-01 |
| cg27567922 | -13.38 | 5.42  | 1.36E-02 | -22.79 | 13.60 | 9.38E-02 | -1.21   | 17.35  | 9.45E-01 | -9.70  | 7.26  | 1.82E-01 | -22.84 | 12.61 | 7.01E-02 |
| cg15627078 | 27.55  | 11.17 | 1.36E-02 | 17.98  | 35.71 | 6.15E-01 | 9.49    | 109.84 | 9.31E-01 | 25.64  | 12.32 | 3.75E-02 | 65.84  | 42.11 | 1.18E-01 |
| cg26165081 | 7.94   | 3.22  | 1.36E-02 | 8.90   | 4.83  | 6.56E-02 | 6.64    | 8.14   | 4.15E-01 | 11.06  | 6.06  | 6.80E-02 | -1.44  | 9.41  | 8.78E-01 |
| cg17999280 | 18.25  | 7.40  | 1.36E-02 | 16.53  | 11.64 | 1.55E-01 | 20.07   | 14.64  | 1.70E-01 | 18.17  | 15.68 | 2.46E-01 | 20.31  | 21.54 | 3.46E-01 |
| cg01825245 | 42.07  | 17.06 | 1.36E-02 | -9.00  | 32.94 | 7.85E-01 | 20.15   | 108.55 | 8.53E-01 | 56.54  | 17.51 | 1.24E-03 | 66.39  | 42.01 | 1.14E-01 |
| cg17698584 | 35.01  | 14.19 | 1.36E-02 | 39.43  | 20.42 | 5.35E-02 | -1.86   | 33.95  | 9.56E-01 | 42.94  | 42.84 | 3.16E-01 | 49.79  | 29.44 | 9.08E-02 |
| cg19427746 | 4.96   | 2.01  | 1.36E-02 | 2.68   | 2.70  | 3.21E-01 | 7.07    | 4.35   | 1.04E-01 | 3.44   | 7.07  | 6.27E-01 | 11.13  | 5.17  | 3.12E-02 |
| cg23308107 | 41.02  | 16.63 | 1.36E-02 | 31.72  | 38.59 | 4.11E-01 | 56.77   | 87.15  | 5.15E-01 | 42.97  | 20.49 | 3.60E-02 | 39.92  | 48.18 | 4.07E-01 |
| cg09983885 | 8.43   | 3.42  | 1.36E-02 | 3.82   | 4.80  | 4.26E-01 | 17.20   | 8.19   | 3.56E-02 | 16.19  | 9.86  | 1.01E-01 | 7.82   | 7.68  | 3.08E-01 |
| cg25915307 | 16.49  | 6.69  | 1.36E-02 | 14.88  | 11.01 | 1.77E-01 | 22.08   | 17.43  | 2.05E-01 | 75.85  | 41.45 | 6.72E-02 | 12.62  | 9.88  | 2.01E-01 |
| cg00831222 | 5.62   | 2.28  | 1.37E-02 | 2.65   | 3.32  | 4.24E-01 | 10.54   | 5.04   | 3.66E-02 | 2.98   | 7.90  | 7.06E-01 | 8.14   | 4.63  | 7.87E-02 |
| cg14516287 | -8.99  | 3.65  | 1.37E-02 | -8.44  | 6.21  | 1.74E-01 | -7.18   | 8.22   | 3.82E-01 | -13.76 | 7.21  | 5.63E-02 | -5.67  | 8.10  | 4.84E-01 |
| cg18096987 | 9.94   | 4.03  | 1.37E-02 | 12.34  | 6.03  | 4.05E-02 | 10.22   | 9.99   | 3.06E-01 | 11.56  | 9.38  | 2.18E-01 | 3.02   | 8.90  | 7.35E-01 |
| cg25707057 | -69.28 | 28.09 | 1.37E-02 | -75.57 | 36.50 | 3.84E-02 | -119.03 | 108.35 | 2.72E-01 | 26.07  | 94.69 | 7.83E-01 | -74.52 | 55.93 | 1.83E-01 |
| cg05246315 | 21.07  | 8.54  | 1.37E-02 | 22.57  | 15.54 | 1.47E-01 | 24.97   | 15.91  | 1.16E-01 | 28.14  | 17.58 | 1.09E-01 | 2.29   | 20.55 | 9.11E-01 |
| cg08703808 | -15.21 | 6.17  | 1.37E-02 | -27.59 | 11.17 | 1.36E-02 | -13.11  | 14.90  | 3.79E-01 | -8.08  | 11.65 | 4.88E-01 | -9.42  | 12.49 | 4.51E-01 |
| cg21888118 | 16.84  | 6.83  | 1.37E-02 | 33.00  | 19.53 | 9.10E-02 | 37.60   | 30.45  | 2.17E-01 | 12.16  | 7.77  | 1.18E-01 | 27.79  | 29.21 | 3.42E-01 |
| cg07780095 | 11.70  | 4.74  | 1.37E-02 | 24.54  | 13.34 | 6.59E-02 | 12.14   | 14.16  | 3.91E-01 | 15.77  | 7.11  | 2.66E-02 | 0.67   | 8.44  | 9.36E-01 |
| cg07602008 | -25.66 | 10.41 | 1.37E-02 | -4.52  | 24.72 | 8.55E-01 | 20.04   | 45.44  | 6.59E-01 | -37.12 | 12.53 | 3.05E-03 | -3.77  | 36.67 | 9.18E-01 |
| cg07436562 | 18.18  | 7.37  | 1.37E-02 | 17.74  | 11.78 | 1.32E-01 | 28.97   | 12.62  | 2.17E-02 | 7.31   | 21.45 | 7.33E-01 | 3.24   | 19.11 | 8.66E-01 |
| cg08799173 | 18.41  | 7.46  | 1.37E-02 | -9.61  | 24.26 | 6.92E-01 | 23.77   | 39.76  | 5.50E-01 | 18.49  | 9.12  | 4.25E-02 | 30.47  | 16.71 | 6.82E-02 |
| cg06500134 | 24.26  | 9.84  | 1.37E-02 | 41.67  | 13.42 | 1.90E-03 | 0.58    | 22.64  | 9.80E-01 | 10.30  | 27.92 | 7.12E-01 | 15.42  | 19.30 | 4.24E-01 |

|            |        |       |          |        |       |          |         |        |          |        |       |          |        |       |          |
|------------|--------|-------|----------|--------|-------|----------|---------|--------|----------|--------|-------|----------|--------|-------|----------|
| cg11631160 | 18.55  | 7.52  | 1.37E-02 | 17.25  | 10.66 | 1.06E-01 | 35.50   | 31.64  | 2.62E-01 | 32.28  | 33.50 | 3.35E-01 | 16.01  | 11.96 | 1.81E-01 |
| cg02433905 | 32.85  | 13.32 | 1.37E-02 | 36.20  | 16.12 | 2.47E-02 | 67.82   | 59.49  | 2.54E-01 | -22.65 | 72.86 | 7.56E-01 | 23.46  | 27.59 | 3.95E-01 |
| cg13992382 | -14.71 | 5.96  | 1.37E-02 | -28.51 | 14.42 | 4.80E-02 | -2.54   | 34.50  | 9.41E-01 | -10.44 | 7.25  | 1.50E-01 | -21.97 | 17.07 | 1.98E-01 |
| cg00809021 | -18.81 | 7.63  | 1.37E-02 | -19.89 | 12.97 | 1.25E-01 | -26.02  | 14.47  | 7.20E-02 | 0.86   | 21.07 | 9.68E-01 | -19.64 | 15.44 | 2.03E-01 |
| cg02717503 | 17.93  | 7.27  | 1.37E-02 | 16.92  | 15.30 | 2.69E-01 | -30.69  | 31.55  | 3.31E-01 | 25.05  | 9.87  | 1.11E-02 | 12.29  | 16.99 | 4.69E-01 |
| cg07163991 | -74.34 | 30.16 | 1.37E-02 | -87.24 | 43.46 | 4.47E-02 | 82.01   | 189.02 | 6.64E-01 | -78.58 | 60.70 | 1.95E-01 | -61.04 | 60.76 | 3.15E-01 |
| cg15103426 | -53.59 | 21.74 | 1.37E-02 | -49.08 | 27.77 | 7.72E-02 | -109.88 | 110.76 | 3.21E-01 | -2.02  | 96.22 | 9.83E-01 | -64.44 | 39.85 | 1.06E-01 |
| cg00456086 | 16.38  | 6.65  | 1.37E-02 | 25.04  | 11.41 | 2.82E-02 | -6.64   | 28.87  | 8.18E-01 | 12.89  | 11.66 | 2.69E-01 | 14.31  | 12.50 | 2.52E-01 |
| cg24625984 | -9.05  | 3.67  | 1.37E-02 | -10.10 | 5.76  | 7.96E-02 | -5.92   | 9.05   | 5.13E-01 | -4.35  | 7.46  | 5.60E-01 | -15.61 | 8.49  | 6.60E-02 |
| cg23636568 | 8.31   | 3.37  | 1.37E-02 | 1.87   | 5.14  | 7.17E-01 | 14.08   | 8.03   | 7.97E-02 | 12.93  | 7.34  | 7.81E-02 | 12.54  | 7.87  | 1.11E-01 |
| cg26098816 | -9.01  | 3.65  | 1.37E-02 | -13.23 | 8.23  | 1.08E-01 | -15.95  | 15.08  | 2.90E-01 | -4.78  | 4.56  | 2.94E-01 | -23.66 | 11.51 | 3.98E-02 |
| cg08239297 | 17.70  | 7.18  | 1.37E-02 | 11.48  | 11.24 | 3.07E-01 | 18.97   | 13.46  | 1.59E-01 | 20.96  | 17.25 | 2.24E-01 | 29.79  | 19.65 | 1.30E-01 |
| cg16818443 | -39.28 | 15.94 | 1.37E-02 | -37.03 | 42.15 | 3.80E-01 | 298.32  | 235.06 | 2.04E-01 | -45.74 | 17.95 | 1.09E-02 | 10.54  | 62.73 | 8.67E-01 |
| cg15543534 | -17.14 | 6.95  | 1.37E-02 | -19.02 | 15.26 | 2.12E-01 | -7.41   | 32.85  | 8.22E-01 | -20.76 | 8.58  | 1.55E-02 | 8.78   | 23.17 | 7.05E-01 |
| cg05769505 | -12.62 | 5.12  | 1.37E-02 | -24.50 | 11.30 | 3.01E-02 | -5.29   | 18.64  | 7.77E-01 | -8.42  | 6.63  | 2.04E-01 | -17.77 | 14.70 | 2.27E-01 |
| cg22755816 | -25.51 | 10.35 | 1.37E-02 | -2.45  | 40.72 | 9.52E-01 | -135.07 | 120.68 | 2.63E-01 | -29.33 | 11.34 | 9.69E-03 | 0.93   | 33.64 | 9.78E-01 |
| cg20557688 | -8.47  | 3.44  | 1.37E-02 | -16.21 | 7.70  | 3.53E-02 | 0.57    | 9.61   | 9.53E-01 | -8.68  | 4.67  | 6.33E-02 | -4.69  | 9.49  | 6.21E-01 |
| cg23139584 | 9.71   | 3.94  | 1.37E-02 | 6.23   | 5.08  | 2.20E-01 | 13.10   | 11.11  | 2.38E-01 | 31.49  | 18.47 | 8.83E-02 | 12.68  | 8.27  | 1.25E-01 |
| cg09317398 | -13.47 | 5.47  | 1.37E-02 | -15.79 | 7.90  | 4.56E-02 | -23.99  | 12.25  | 5.03E-02 | -5.34  | 16.26 | 7.43E-01 | -2.51  | 11.98 | 8.34E-01 |
| cg15091068 | 48.11  | 19.53 | 1.37E-02 | 38.97  | 24.41 | 1.10E-01 | 52.42   | 60.16  | 3.84E-01 | 67.93  | 63.05 | 2.81E-01 | 70.07  | 48.98 | 1.53E-01 |
| cg14159026 | 17.65  | 7.16  | 1.38E-02 | 39.97  | 27.25 | 1.42E-01 | -24.85  | 69.67  | 7.21E-01 | 17.01  | 7.78  | 2.88E-02 | 10.07  | 26.58 | 7.05E-01 |
| cg03928429 | -36.15 | 14.67 | 1.38E-02 | -18.97 | 20.67 | 3.59E-01 | -69.03  | 48.74  | 1.57E-01 | -55.85 | 32.66 | 8.73E-02 | -44.53 | 32.54 | 1.71E-01 |
| cg12126038 | 9.96   | 4.04  | 1.38E-02 | 9.55   | 5.45  | 7.95E-02 | 12.46   | 9.48   | 1.89E-01 | 11.10  | 14.00 | 4.28E-01 | 8.20   | 9.44  | 3.85E-01 |
| cg11190890 | 22.25  | 9.03  | 1.38E-02 | 34.30  | 17.22 | 4.64E-02 | 11.26   | 17.71  | 5.25E-01 | 11.30  | 15.48 | 4.66E-01 | 48.54  | 25.61 | 5.80E-02 |
| cg18182358 | 32.43  | 13.16 | 1.38E-02 | 34.32  | 17.17 | 4.56E-02 | 101.30  | 69.62  | 1.46E-01 | 76.09  | 62.87 | 2.26E-01 | 15.90  | 22.83 | 4.86E-01 |
| cg10175688 | -22.75 | 9.24  | 1.38E-02 | -10.73 | 38.28 | 7.79E-01 | 130.06  | 147.96 | 3.79E-01 | -26.65 | 9.86  | 6.87E-03 | 12.55  | 37.64 | 7.39E-01 |
| cg14499387 | 10.96  | 4.45  | 1.38E-02 | 14.07  | 7.80  | 7.11E-02 | 14.51   | 10.81  | 1.79E-01 | 9.84   | 6.88  | 1.53E-01 | -2.25  | 15.08 | 8.81E-01 |
| cg09163998 | 22.32  | 9.06  | 1.38E-02 | 31.70  | 12.24 | 9.59E-03 | 5.21    | 31.23  | 8.68E-01 | -43.18 | 64.15 | 5.01E-01 | 15.43  | 15.37 | 3.15E-01 |
| cg01959730 | 13.45  | 5.46  | 1.38E-02 | 18.91  | 12.46 | 1.29E-01 | 4.80    | 19.49  | 8.05E-01 | 14.50  | 7.88  | 6.60E-02 | 9.96   | 10.93 | 3.62E-01 |
| cg12644264 | 31.22  | 12.68 | 1.38E-02 | 31.53  | 16.84 | 6.12E-02 | 44.01   | 73.06  | 5.47E-01 | 21.40  | 38.24 | 5.76E-01 | 33.00  | 23.41 | 1.59E-01 |
| cg05716350 | 8.28   | 3.36  | 1.38E-02 | 2.28   | 5.84  | 6.97E-01 | 8.79    | 7.44   | 2.38E-01 | 14.05  | 5.79  | 1.51E-02 | 7.78   | 9.43  | 4.10E-01 |
| cg07184698 | 52.34  | 21.25 | 1.38E-02 | 60.27  | 49.37 | 2.22E-01 | -170.20 | 251.07 | 4.98E-01 | 55.59  | 24.98 | 2.61E-02 | 25.74  | 73.45 | 7.26E-01 |
| cg02954056 | 14.62  | 5.94  | 1.38E-02 | 25.29  | 9.94  | 1.09E-02 | 8.22    | 18.07  | 6.49E-01 | 15.18  | 9.99  | 1.29E-01 | -3.51  | 13.89 | 8.00E-01 |
| cg00029246 | 7.27   | 2.95  | 1.38E-02 | 10.10  | 4.22  | 1.66E-02 | 5.50    | 6.27   | 3.80E-01 | 11.73  | 8.91  | 1.88E-01 | -1.09  | 7.02  | 8.76E-01 |
| cg06885284 | 16.23  | 6.59  | 1.38E-02 | 19.96  | 14.04 | 1.55E-01 | 12.25   | 21.60  | 5.71E-01 | 15.63  | 8.73  | 7.35E-02 | 15.29  | 19.26 | 4.27E-01 |

|            |        |       |          |        |       |          |        |        |          |        |       |          |        |       |          |
|------------|--------|-------|----------|--------|-------|----------|--------|--------|----------|--------|-------|----------|--------|-------|----------|
| cg07593390 | 7.87   | 3.20  | 1.38E-02 | 5.02   | 4.96  | 3.11E-01 | 8.45   | 7.59   | 2.65E-01 | 11.85  | 5.89  | 4.43E-02 | 7.12   | 9.57  | 4.57E-01 |
| cg05474761 | 8.70   | 3.53  | 1.38E-02 | 5.10   | 4.63  | 2.70E-01 | 14.47  | 7.99   | 7.03E-02 | 17.02  | 13.41 | 2.04E-01 | 11.35  | 9.10  | 2.12E-01 |
| cg25127011 | 17.67  | 7.17  | 1.38E-02 | 20.35  | 17.12 | 2.34E-01 | 18.89  | 22.64  | 4.04E-01 | 13.43  | 9.06  | 1.38E-01 | 39.03  | 23.09 | 9.09E-02 |
| cg04861793 | -19.00 | 7.71  | 1.38E-02 | -19.07 | 21.92 | 3.84E-01 | -26.31 | 31.30  | 4.01E-01 | -17.28 | 8.94  | 5.34E-02 | -30.57 | 28.89 | 2.90E-01 |
| cg14819242 | -15.71 | 6.38  | 1.38E-02 | -24.07 | 13.48 | 7.40E-02 | -6.33  | 15.62  | 6.85E-01 | -11.92 | 9.16  | 1.93E-01 | -28.20 | 18.20 | 1.21E-01 |
| cg25503565 | 27.51  | 11.17 | 1.38E-02 | 31.68  | 17.94 | 7.74E-02 | -14.12 | 39.45  | 7.20E-01 | 32.24  | 17.93 | 7.22E-02 | 26.72  | 29.52 | 3.65E-01 |
| cg14585415 | 17.54  | 7.13  | 1.38E-02 | 13.47  | 11.78 | 2.53E-01 | 25.75  | 12.72  | 4.29E-02 | -2.96  | 19.70 | 8.80E-01 | 26.00  | 16.40 | 1.13E-01 |
| cg08754088 | -10.38 | 4.22  | 1.38E-02 | -14.14 | 6.91  | 4.06E-02 | -1.68  | 10.27  | 8.70E-01 | -14.87 | 8.23  | 7.07E-02 | -4.70  | 9.52  | 6.22E-01 |
| cg01392273 | 23.56  | 9.57  | 1.38E-02 | 34.13  | 17.39 | 4.97E-02 | 12.99  | 17.77  | 4.65E-01 | 26.84  | 18.86 | 1.55E-01 | 16.99  | 24.75 | 4.92E-01 |
| cg13253303 | 18.14  | 7.37  | 1.38E-02 | 28.58  | 11.98 | 1.70E-02 | -26.56 | 25.05  | 2.89E-01 | 18.60  | 7.65  | 1.50E-02 | 20.96  | 16.16 | 1.95E-01 |
| cg20327105 | 17.04  | 6.92  | 1.38E-02 | 13.88  | 8.84  | 1.16E-01 | 25.99  | 20.65  | 2.08E-01 | -8.48  | 39.85 | 8.32E-01 | 23.99  | 14.00 | 8.67E-02 |
| cg18484309 | -8.35  | 3.39  | 1.38E-02 | -8.59  | 5.35  | 1.08E-01 | -3.52  | 7.36   | 6.32E-01 | -8.17  | 7.53  | 2.78E-01 | -13.62 | 7.94  | 8.61E-02 |
| cg01198491 | -18.32 | 7.44  | 1.38E-02 | -15.77 | 13.82 | 2.54E-01 | -24.66 | 20.91  | 2.38E-01 | -10.51 | 5.04  | 3.72E-02 | -48.54 | 18.18 | 7.58E-03 |
| cg01049678 | 16.94  | 6.88  | 1.38E-02 | 18.27  | 9.03  | 4.29E-02 | 31.54  | 21.17  | 1.36E-01 | 20.56  | 20.64 | 3.19E-01 | 3.44   | 15.33 | 8.23E-01 |
| cg19201068 | -20.78 | 8.44  | 1.38E-02 | -29.75 | 15.71 | 5.82E-02 | -16.12 | 20.49  | 4.31E-01 | -13.35 | 14.88 | 3.70E-01 | -23.46 | 18.03 | 1.93E-01 |
| cg24338411 | -12.69 | 5.16  | 1.38E-02 | -17.94 | 7.34  | 1.45E-02 | -3.93  | 12.63  | 7.56E-01 | -15.38 | 14.10 | 2.75E-01 | -5.46  | 11.37 | 6.31E-01 |
| cg05986044 | 32.03  | 13.01 | 1.39E-02 | 25.42  | 19.11 | 1.83E-01 | -26.09 | 100.82 | 7.96E-01 | 33.35  | 23.24 | 1.51E-01 | 49.57  | 28.67 | 8.38E-02 |
| cg22149355 | 11.78  | 4.79  | 1.39E-02 | 11.48  | 9.38  | 2.21E-01 | 1.51   | 11.24  | 8.93E-01 | 9.32   | 8.57  | 2.77E-01 | 22.84  | 9.66  | 1.81E-02 |
| cg16734549 | 10.15  | 4.12  | 1.39E-02 | 13.01  | 5.54  | 1.88E-02 | 14.92  | 9.87   | 1.30E-01 | -5.99  | 11.24 | 5.94E-01 | 8.31   | 11.21 | 4.59E-01 |
| cg07655479 | 37.36  | 15.18 | 1.39E-02 | 45.70  | 19.07 | 1.66E-02 | -17.56 | 79.21  | 8.25E-01 | 80.95  | 46.77 | 8.35E-02 | 2.30   | 32.06 | 9.43E-01 |
| cg14240790 | -14.17 | 5.76  | 1.39E-02 | -17.11 | 9.12  | 6.08E-02 | -16.87 | 14.72  | 2.52E-01 | -14.65 | 12.31 | 2.34E-01 | -6.83  | 12.01 | 5.70E-01 |
| cg01747263 | 27.33  | 11.10 | 1.39E-02 | 23.96  | 13.34 | 7.24E-02 | 10.38  | 44.26  | 8.15E-01 | 82.78  | 73.76 | 2.62E-01 | 37.03  | 23.63 | 1.17E-01 |
| cg01478155 | 12.61  | 5.12  | 1.39E-02 | 15.87  | 6.91  | 2.17E-02 | 19.00  | 12.05  | 1.15E-01 | 9.26   | 15.48 | 5.50E-01 | -3.53  | 12.81 | 7.83E-01 |
| cg21210630 | 19.25  | 7.83  | 1.39E-02 | 25.69  | 13.56 | 5.81E-02 | 19.83  | 16.04  | 2.16E-01 | 15.84  | 15.13 | 2.95E-01 | 10.79  | 19.49 | 5.80E-01 |
| cg24788034 | -25.83 | 10.50 | 1.39E-02 | -32.45 | 14.73 | 2.76E-02 | -40.43 | 39.36  | 3.04E-01 | -36.93 | 24.90 | 1.38E-01 | 0.36   | 21.27 | 9.87E-01 |
| cg17977795 | 35.48  | 14.42 | 1.39E-02 | 51.57  | 38.61 | 1.82E-01 | -81.72 | 147.60 | 5.80E-01 | 32.85  | 16.43 | 4.55E-02 | 46.74  | 50.98 | 3.59E-01 |
| cg24542360 | -18.65 | 7.58  | 1.39E-02 | 1.46   | 14.02 | 9.17E-01 | -50.04 | 38.78  | 1.97E-01 | -20.40 | 9.89  | 3.91E-02 | -29.97 | 13.32 | 2.44E-02 |
| cg23990124 | -9.38  | 3.81  | 1.39E-02 | -12.91 | 7.40  | 8.10E-02 | 5.99   | 12.19  | 6.23E-01 | -10.38 | 5.11  | 4.22E-02 | -9.52  | 13.53 | 4.82E-01 |
| cg21661111 | -12.26 | 4.98  | 1.39E-02 | -23.56 | 8.84  | 7.69E-03 | -12.84 | 13.98  | 3.58E-01 | -3.27  | 8.36  | 6.96E-01 | -9.91  | 11.15 | 3.74E-01 |
| cg05140624 | -7.62  | 3.10  | 1.39E-02 | -7.83  | 4.67  | 9.35E-02 | -5.44  | 6.77   | 4.21E-01 | -4.65  | 8.31  | 5.76E-01 | -11.31 | 6.74  | 9.36E-02 |
| cg26798452 | 18.64  | 7.58  | 1.39E-02 | 19.45  | 11.14 | 8.08E-02 | 18.01  | 16.76  | 2.83E-01 | 46.40  | 18.01 | 9.98E-03 | 5.53   | 11.02 | 6.16E-01 |
| cg14065841 | 40.85  | 16.61 | 1.39E-02 | 28.64  | 21.85 | 1.90E-01 | -42.86 | 76.18  | 5.74E-01 | 63.30  | 69.43 | 3.62E-01 | 71.52  | 29.46 | 1.52E-02 |
| cg14148981 | -11.74 | 4.77  | 1.39E-02 | -11.53 | 8.24  | 1.62E-01 | -8.04  | 15.02  | 5.92E-01 | -8.24  | 7.15  | 2.49E-01 | -29.00 | 13.99 | 3.81E-02 |
| cg04638014 | 8.21   | 3.34  | 1.39E-02 | 5.03   | 4.88  | 3.03E-01 | 15.17  | 7.59   | 4.55E-02 | 9.15   | 8.47  | 2.80E-01 | 8.17   | 7.78  | 2.94E-01 |
| cg23695880 | -10.75 | 4.37  | 1.39E-02 | -13.38 | 6.49  | 3.92E-02 | 0.12   | 9.20   | 9.90E-01 | -13.65 | 14.16 | 3.35E-01 | -15.10 | 9.21  | 1.01E-01 |

|               |        |       |          |        |       |          |        |        |          |        |        |          |        |       |          |
|---------------|--------|-------|----------|--------|-------|----------|--------|--------|----------|--------|--------|----------|--------|-------|----------|
| cg19379845    | -20.43 | 8.31  | 1.39E-02 | -15.72 | 24.31 | 5.18E-01 | -61.60 | 30.62  | 4.43E-02 | -19.52 | 9.67   | 4.36E-02 | 4.52   | 30.79 | 8.83E-01 |
| cg18759209    | 20.41  | 8.30  | 1.39E-02 | 32.64  | 18.94 | 8.49E-02 | 1.48   | 24.41  | 9.52E-01 | 18.51  | 11.97  | 1.22E-01 | 23.95  | 18.01 | 1.84E-01 |
| cg14208041    | -7.62  | 3.10  | 1.39E-02 | -9.32  | 5.86  | 1.12E-01 | -1.26  | 9.80   | 8.98E-01 | -5.51  | 4.46   | 2.17E-01 | -16.02 | 8.29  | 5.33E-02 |
| cg04240660    | 24.07  | 9.79  | 1.39E-02 | 38.82  | 17.53 | 2.68E-02 | 22.78  | 18.44  | 2.17E-01 | 9.84   | 8.21   | 2.31E-01 | 56.76  | 26.42 | 3.17E-02 |
| cg05856556    | -14.53 | 5.91  | 1.39E-02 | -23.79 | 9.18  | 9.56E-03 | -15.00 | 13.16  | 2.54E-01 | -6.92  | 12.55  | 5.81E-01 | -0.71  | 14.65 | 9.61E-01 |
| cg14579177    | -37.47 | 15.24 | 1.39E-02 | -49.11 | 18.83 | 9.12E-03 | -50.38 | 82.31  | 5.41E-01 | -10.40 | 57.39  | 8.56E-01 | -11.90 | 31.06 | 7.02E-01 |
| cg21625817    | -10.11 | 4.11  | 1.39E-02 | -10.61 | 9.21  | 2.49E-01 | -27.73 | 22.69  | 2.22E-01 | -8.42  | 5.22   | 1.07E-01 | -12.57 | 10.66 | 2.38E-01 |
| cg08838842    | 11.57  | 4.71  | 1.39E-02 | 9.75   | 6.34  | 1.24E-01 | 23.29  | 8.64   | 7.02E-03 | -1.24  | 8.54   | 8.85E-01 | 15.23  | 8.01  | 5.74E-02 |
| cg21095280    | -9.95  | 4.05  | 1.39E-02 | -12.20 | 5.92  | 3.94E-02 | -15.57 | 9.14   | 8.83E-02 | -4.14  | 12.05  | 7.31E-01 | -3.27  | 8.55  | 7.02E-01 |
| cg19380303    | -14.33 | 5.83  | 1.39E-02 | -11.54 | 8.87  | 1.93E-01 | -14.75 | 15.03  | 3.26E-01 | -19.68 | 14.73  | 1.82E-01 | -15.51 | 11.41 | 1.74E-01 |
| cg00978203    | 20.33  | 8.27  | 1.39E-02 | 8.82   | 16.58 | 5.95E-01 | 26.12  | 18.80  | 1.65E-01 | 15.24  | 13.51  | 2.59E-01 | 40.21  | 19.30 | 3.72E-02 |
| cg13567156    | -33.24 | 13.52 | 1.39E-02 | -43.05 | 23.47 | 6.66E-02 | 41.01  | 74.14  | 5.80E-01 | -30.96 | 25.88  | 2.32E-01 | -32.78 | 22.46 | 1.44E-01 |
| cg05808356    | 18.69  | 7.60  | 1.39E-02 | 9.60   | 20.30 | 6.36E-01 | -1.45  | 36.32  | 9.68E-01 | 24.32  | 8.93   | 6.48E-03 | -2.31  | 25.18 | 9.27E-01 |
| cg02656594    | 6.83   | 2.78  | 1.39E-02 | 5.08   | 3.76  | 1.76E-01 | 10.40  | 6.64   | 1.17E-01 | 10.99  | 8.46   | 1.94E-01 | 6.16   | 6.77  | 3.63E-01 |
| cg26144909    | -6.48  | 2.63  | 1.40E-02 | -3.21  | 3.24  | 3.21E-01 | -2.25  | 5.66   | 6.91E-01 | -13.34 | 6.93   | 5.43E-02 | -11.53 | 4.62  | 1.26E-02 |
| cg15476528    | 29.34  | 11.93 | 1.40E-02 | 35.47  | 42.93 | 4.09E-01 | -17.73 | 114.39 | 8.77E-01 | 29.18  | 13.27  | 2.79E-02 | 30.92  | 37.12 | 4.05E-01 |
| cg12636835    | -8.20  | 3.34  | 1.40E-02 | -6.54  | 4.69  | 1.63E-01 | -12.48 | 7.84   | 1.12E-01 | -6.18  | 9.01   | 4.93E-01 | -10.13 | 7.94  | 2.02E-01 |
| cg18489675    | -10.53 | 4.28  | 1.40E-02 | -13.77 | 5.85  | 1.85E-02 | -0.69  | 11.88  | 9.54E-01 | 1.48   | 12.11  | 9.03E-01 | -15.55 | 9.40  | 9.82E-02 |
| cg03358154    | -10.93 | 4.45  | 1.40E-02 | -15.52 | 6.10  | 1.10E-02 | -1.84  | 12.18  | 8.80E-01 | -2.69  | 13.34  | 8.40E-01 | -9.55  | 9.36  | 3.08E-01 |
| cg20235651    | -26.54 | 10.80 | 1.40E-02 | -21.48 | 12.14 | 7.67E-02 | 25.19  | 76.37  | 7.42E-01 | -77.29 | 76.82  | 3.14E-01 | -50.41 | 26.27 | 5.50E-02 |
| cg22994198    | 6.77   | 2.75  | 1.40E-02 | 3.37   | 4.49  | 4.53E-01 | 5.29   | 5.17   | 3.06E-01 | 16.49  | 7.50   | 2.78E-02 | 8.68   | 6.09  | 1.55E-01 |
| cg13023677    | 9.33   | 3.80  | 1.40E-02 | 11.00  | 5.11  | 3.13E-02 | 14.02  | 9.03   | 1.20E-01 | 14.56  | 13.56  | 2.83E-01 | -1.93  | 8.67  | 8.24E-01 |
| cg19828146    | -13.45 | 5.47  | 1.40E-02 | -12.96 | 11.18 | 2.46E-01 | 5.26   | 16.71  | 7.53E-01 | -20.97 | 7.67   | 6.28E-03 | -1.66  | 14.41 | 9.08E-01 |
| cg01275932    | 12.78  | 5.20  | 1.40E-02 | 10.97  | 7.26  | 1.31E-01 | 17.36  | 10.51  | 9.87E-02 | 31.82  | 17.96  | 7.63E-02 | 1.50   | 13.04 | 9.09E-01 |
| cg09789650    | -13.59 | 5.53  | 1.40E-02 | -16.94 | 8.13  | 3.73E-02 | -17.83 | 12.35  | 1.49E-01 | -10.85 | 18.25  | 5.52E-01 | -4.85  | 11.16 | 6.64E-01 |
| cg27597084    | -29.19 | 11.88 | 1.40E-02 | -34.29 | 32.60 | 2.93E-01 | 5.92   | 43.02  | 8.91E-01 | -33.02 | 14.03  | 1.86E-02 | -19.24 | 43.36 | 6.57E-01 |
| cg02200939    | 32.29  | 13.14 | 1.40E-02 | 39.92  | 17.41 | 2.19E-02 | -68.20 | 85.91  | 4.27E-01 | 45.46  | 40.95  | 2.67E-01 | 21.28  | 23.82 | 3.72E-01 |
| ch.6.1361432F | -19.19 | 7.81  | 1.40E-02 | -24.34 | 13.66 | 7.47E-02 | -15.76 | 14.23  | 2.68E-01 | -20.00 | 17.20  | 2.45E-01 | -14.26 | 19.17 | 4.57E-01 |
| cg24998879    | -20.55 | 8.36  | 1.40E-02 | -9.09  | 19.56 | 6.42E-01 | -23.27 | 26.25  | 3.75E-01 | -20.08 | 10.50  | 5.58E-02 | -46.77 | 29.39 | 1.12E-01 |
| cg09340205    | -12.76 | 5.19  | 1.40E-02 | -19.32 | 14.76 | 1.90E-01 | 37.77  | 32.85  | 2.50E-01 | -12.96 | 5.89   | 2.78E-02 | -16.78 | 19.12 | 3.80E-01 |
| cg20383624    | -38.72 | 15.76 | 1.40E-02 | -32.32 | 19.92 | 1.05E-01 | -36.13 | 50.19  | 4.72E-01 | -87.40 | 32.34  | 6.89E-03 | -6.57  | 31.77 | 8.36E-01 |
| cg06528306    | 24.42  | 9.94  | 1.40E-02 | 40.99  | 14.77 | 5.53E-03 | 27.11  | 38.00  | 4.76E-01 | 2.98   | 32.03  | 9.26E-01 | 9.74   | 16.06 | 5.44E-01 |
| cg13414916    | 54.25  | 22.08 | 1.40E-02 | 52.94  | 26.73 | 4.77E-02 | -31.21 | 113.58 | 7.83E-01 | 53.54  | 102.27 | 6.01E-01 | 72.05  | 45.69 | 1.15E-01 |
| cg09355803    | 32.67  | 13.30 | 1.40E-02 | 19.35  | 18.24 | 2.89E-01 | 23.73  | 44.56  | 5.94E-01 | 68.00  | 45.46  | 1.35E-01 | 49.22  | 24.54 | 4.49E-02 |
| cg10647547    | -11.82 | 4.81  | 1.40E-02 | -18.59 | 12.09 | 1.24E-01 | -36.13 | 24.04  | 1.33E-01 | -6.87  | 5.51   | 2.12E-01 | -26.17 | 15.01 | 8.13E-02 |

|            |        |       |          |        |       |          |        |        |          |        |       |          |        |       |          |
|------------|--------|-------|----------|--------|-------|----------|--------|--------|----------|--------|-------|----------|--------|-------|----------|
| cg09685182 | 17.54  | 7.14  | 1.40E-02 | 25.69  | 16.61 | 1.22E-01 | 6.25   | 16.82  | 7.10E-01 | 30.17  | 12.38 | 1.48E-02 | 5.43   | 12.97 | 6.76E-01 |
| cg09430445 | -14.17 | 5.77  | 1.40E-02 | -17.71 | 10.26 | 8.44E-02 | -18.36 | 12.92  | 1.55E-01 | -8.63  | 10.87 | 4.27E-01 | -12.23 | 12.78 | 3.39E-01 |
| cg09774917 | 13.62  | 5.55  | 1.40E-02 | 22.39  | 9.96  | 2.45E-02 | 16.51  | 17.50  | 3.45E-01 | 12.66  | 9.35  | 1.76E-01 | 2.38   | 11.38 | 8.35E-01 |
| cg00050133 | -14.21 | 5.79  | 1.40E-02 | -18.29 | 11.37 | 1.08E-01 | -6.71  | 14.60  | 6.46E-01 | -13.45 | 8.32  | 1.06E-01 | -19.10 | 18.22 | 2.94E-01 |
| cg27497299 | 21.98  | 8.95  | 1.40E-02 | 31.61  | 20.28 | 1.19E-01 | 10.57  | 20.38  | 6.04E-01 | 21.50  | 12.56 | 8.69E-02 | 27.36  | 27.59 | 3.21E-01 |
| cg18963365 | 7.23   | 2.94  | 1.40E-02 | 6.00   | 3.40  | 7.77E-02 | 14.49  | 4.95   | 3.44E-03 | 9.50   | 8.94  | 2.88E-01 | 0.15   | 5.46  | 9.78E-01 |
| cg25356611 | 8.46   | 3.45  | 1.40E-02 | 8.05   | 5.20  | 1.22E-01 | 8.71   | 7.06   | 2.17E-01 | 2.91   | 9.10  | 7.49E-01 | 13.62  | 8.15  | 9.47E-02 |
| cg15963499 | -9.35  | 3.81  | 1.40E-02 | -19.70 | 8.54  | 2.11E-02 | 0.21   | 16.93  | 9.90E-01 | -5.65  | 4.78  | 2.38E-01 | -15.90 | 11.10 | 1.52E-01 |
| cg07547746 | 15.61  | 6.35  | 1.40E-02 | 24.94  | 12.69 | 4.93E-02 | 7.04   | 19.17  | 7.13E-01 | 13.01  | 8.68  | 1.34E-01 | 15.52  | 19.75 | 4.32E-01 |
| cg14058010 | 28.67  | 11.67 | 1.40E-02 | 31.38  | 15.06 | 3.72E-02 | 18.53  | 29.60  | 5.31E-01 | 5.77   | 48.54 | 9.05E-01 | 35.53  | 27.08 | 1.89E-01 |
| cg20356241 | 78.23  | 31.85 | 1.40E-02 | 77.15  | 44.77 | 8.49E-02 | 168.96 | 164.41 | 3.04E-01 | 120.04 | 70.70 | 8.95E-02 | 33.46  | 63.27 | 5.97E-01 |
| cg20610452 | 8.22   | 3.35  | 1.41E-02 | 9.70   | 5.59  | 8.28E-02 | 12.06  | 6.89   | 8.02E-02 | 6.87   | 8.39  | 4.13E-01 | 3.28   | 6.73  | 6.26E-01 |
| cg12467960 | 46.27  | 18.84 | 1.41E-02 | 49.23  | 27.29 | 7.12E-02 | -3.70  | 56.94  | 9.48E-01 | 101.13 | 53.05 | 5.66E-02 | 36.35  | 35.14 | 3.01E-01 |
| cg15392844 | -6.77  | 2.75  | 1.41E-02 | -4.02  | 3.92  | 3.05E-01 | -14.06 | 7.02   | 4.53E-02 | -13.40 | 8.09  | 9.75E-02 | -4.49  | 5.67  | 4.28E-01 |
| cg13974192 | 10.21  | 4.16  | 1.41E-02 | 15.83  | 8.66  | 6.75E-02 | 11.43  | 9.88   | 2.47E-01 | 7.52   | 7.58  | 3.21E-01 | 7.79   | 7.70  | 3.12E-01 |
| cg27521563 | -30.52 | 12.43 | 1.41E-02 | -20.10 | 39.25 | 6.09E-01 | -79.26 | 148.76 | 5.94E-01 | -32.69 | 13.77 | 1.76E-02 | -16.78 | 44.57 | 7.07E-01 |
| cg03163459 | 8.78   | 3.58  | 1.41E-02 | 6.95   | 4.92  | 1.58E-01 | 11.84  | 7.79   | 1.28E-01 | 0.42   | 14.67 | 9.77E-01 | 12.83  | 7.96  | 1.07E-01 |
| cg25540028 | -10.04 | 4.09  | 1.41E-02 | -8.34  | 6.66  | 2.10E-01 | 4.34   | 12.87  | 7.36E-01 | -12.53 | 6.24  | 4.46E-02 | -21.13 | 13.46 | 1.16E-01 |
| cg09954820 | -10.20 | 4.16  | 1.41E-02 | -16.19 | 10.99 | 1.41E-01 | -11.38 | 17.46  | 5.15E-01 | -6.80  | 5.02  | 1.75E-01 | -22.61 | 12.31 | 6.61E-02 |
| cg23924137 | 13.95  | 5.68  | 1.41E-02 | 13.17  | 12.99 | 3.11E-01 | 3.18   | 23.61  | 8.93E-01 | 16.02  | 6.94  | 2.11E-02 | 6.45   | 20.01 | 7.47E-01 |
| cg07979236 | 5.91   | 2.41  | 1.41E-02 | 5.68   | 3.08  | 6.47E-02 | 12.43  | 5.59   | 2.61E-02 | 5.54   | 8.74  | 5.26E-01 | -2.29  | 6.73  | 7.34E-01 |
| cg21897880 | 19.50  | 7.94  | 1.41E-02 | 16.64  | 15.15 | 2.72E-01 | 28.94  | 15.15  | 5.60E-02 | 8.12   | 18.54 | 6.61E-01 | 20.56  | 15.39 | 1.82E-01 |
| cg07001734 | 23.50  | 9.57  | 1.41E-02 | 30.45  | 16.12 | 5.89E-02 | -29.19 | 39.36  | 4.58E-01 | 23.34  | 13.98 | 9.51E-02 | 29.68  | 27.68 | 2.84E-01 |
| cg26266876 | 8.97   | 3.65  | 1.41E-02 | 11.17  | 5.12  | 2.92E-02 | 12.39  | 10.41  | 2.34E-01 | 9.51   | 8.36  | 2.55E-01 | -0.31  | 8.68  | 9.72E-01 |
| cg23990435 | 22.56  | 9.19  | 1.41E-02 | 22.26  | 20.14 | 2.69E-01 | 19.51  | 19.03  | 3.05E-01 | 19.18  | 13.97 | 1.70E-01 | 40.31  | 25.88 | 1.19E-01 |
| cg05381746 | 18.64  | 7.59  | 1.41E-02 | 25.04  | 27.28 | 3.59E-01 | 0.16   | 47.65  | 9.97E-01 | 20.23  | 8.50  | 1.73E-02 | 5.59   | 24.09 | 8.16E-01 |
| cg11303605 | 20.57  | 8.38  | 1.41E-02 | 1.23   | 20.41 | 9.52E-01 | 13.38  | 35.98  | 7.10E-01 | 26.32  | 10.21 | 9.95E-03 | 18.47  | 26.06 | 4.79E-01 |
| cg16719228 | 14.35  | 5.85  | 1.41E-02 | 9.31   | 17.93 | 6.04E-01 | 57.80  | 60.41  | 3.39E-01 | 16.14  | 6.60  | 1.44E-02 | 1.43   | 18.62 | 9.39E-01 |
| cg04439516 | 75.67  | 30.82 | 1.41E-02 | 81.96  | 41.26 | 4.70E-02 | 35.68  | 169.40 | 8.33E-01 | 38.10  | 17.61 | 3.05E-02 | 176.57 | 60.61 | 3.58E-03 |
| cg18151410 | 21.04  | 8.57  | 1.41E-02 | 44.20  | 21.05 | 3.57E-02 | 14.59  | 35.67  | 6.83E-01 | 16.09  | 10.24 | 1.16E-01 | 21.03  | 31.02 | 4.98E-01 |
| cg19692710 | -13.59 | 5.54  | 1.41E-02 | -12.35 | 15.36 | 4.21E-01 | 10.85  | 18.88  | 5.65E-01 | -16.83 | 6.50  | 9.58E-03 | -12.03 | 22.99 | 6.01E-01 |
| cg02103647 | -11.78 | 4.80  | 1.41E-02 | -19.21 | 11.26 | 8.81E-02 | 6.17   | 20.89  | 7.68E-01 | -11.33 | 5.83  | 5.18E-02 | -10.65 | 16.22 | 5.12E-01 |
| cg12636435 | 7.31   | 2.98  | 1.41E-02 | 4.69   | 3.05  | 1.24E-01 | 14.34  | 5.15   | 5.32E-03 | 13.63  | 9.58  | 1.55E-01 | 1.00   | 6.72  | 8.82E-01 |
| cg15567853 | -13.00 | 5.30  | 1.41E-02 | -9.97  | 12.67 | 4.31E-01 | 16.34  | 20.69  | 4.30E-01 | -14.35 | 6.50  | 2.73E-02 | -28.99 | 16.95 | 8.72E-02 |
| cg01256227 | -7.25  | 2.95  | 1.41E-02 | -6.43  | 4.09  | 1.16E-01 | -7.81  | 7.33   | 2.87E-01 | -7.39  | 9.95  | 4.57E-01 | -8.69  | 6.19  | 1.60E-01 |

|            |        |       |          |         |       |          |         |        |          |        |       |          |        |       |          |
|------------|--------|-------|----------|---------|-------|----------|---------|--------|----------|--------|-------|----------|--------|-------|----------|
| cg24013351 | -14.31 | 5.83  | 1.41E-02 | -23.53  | 16.56 | 1.55E-01 | 7.91    | 21.12  | 7.08E-01 | -14.88 | 6.85  | 2.99E-02 | -16.15 | 21.24 | 4.47E-01 |
| cg02608831 | -10.42 | 4.24  | 1.41E-02 | -14.34  | 8.53  | 9.27E-02 | -7.25   | 9.36   | 4.39E-01 | -13.68 | 7.15  | 5.60E-02 | -2.89  | 9.61  | 7.63E-01 |
| cg07849409 | -30.83 | 12.56 | 1.41E-02 | -32.63  | 13.58 | 1.63E-02 | -4.38   | 82.51  | 9.58E-01 | -43.24 | 72.69 | 5.52E-01 | -16.70 | 41.46 | 6.87E-01 |
| cg14807793 | 15.92  | 6.49  | 1.41E-02 | 20.29   | 9.84  | 3.91E-02 | 8.61    | 14.21  | 5.45E-01 | 17.46  | 18.06 | 3.34E-01 | 13.41  | 13.60 | 3.24E-01 |
| cg16253997 | -23.81 | 9.70  | 1.41E-02 | -21.63  | 18.94 | 2.53E-01 | -72.61  | 54.98  | 1.87E-01 | -22.17 | 12.92 | 8.61E-02 | -23.63 | 25.71 | 3.58E-01 |
| cg17124844 | -17.47 | 7.12  | 1.41E-02 | -25.52  | 15.53 | 1.00E-01 | -12.05  | 19.43  | 5.35E-01 | -15.63 | 10.09 | 1.21E-01 | -17.19 | 17.93 | 3.38E-01 |
| cg26539468 | 8.47   | 3.45  | 1.41E-02 | 8.80    | 4.94  | 7.45E-02 | 14.04   | 8.17   | 8.59E-02 | 5.86   | 8.35  | 4.82E-01 | 4.07   | 8.59  | 6.35E-01 |
| cg03297569 | -31.86 | 12.98 | 1.41E-02 | -34.61  | 17.87 | 5.29E-02 | -207.16 | 255.90 | 4.18E-01 | -45.66 | 20.77 | 2.79E-02 | 19.57  | 35.05 | 5.77E-01 |
| cg05576959 | 9.63   | 3.92  | 1.41E-02 | 11.80   | 5.46  | 3.07E-02 | 14.64   | 8.69   | 9.19E-02 | 2.89   | 11.95 | 8.09E-01 | 1.39   | 9.46  | 8.83E-01 |
| cg14361895 | -17.42 | 7.10  | 1.41E-02 | -25.50  | 15.03 | 8.97E-02 | -5.80   | 31.57  | 8.54E-01 | -15.57 | 8.92  | 8.08E-02 | -16.89 | 23.26 | 4.68E-01 |
| cg13866527 | 22.80  | 9.29  | 1.41E-02 | 28.01   | 10.59 | 8.18E-03 | 1.64    | 74.22  | 9.82E-01 | 30.29  | 39.70 | 4.46E-01 | -2.71  | 23.20 | 9.07E-01 |
| cg10448529 | 24.79  | 10.10 | 1.41E-02 | 25.18   | 16.18 | 1.20E-01 | -28.57  | 48.89  | 5.59E-01 | 28.59  | 16.23 | 7.81E-02 | 28.41  | 23.80 | 2.33E-01 |
| cg11700230 | 11.80  | 4.81  | 1.41E-02 | 9.87    | 7.12  | 1.66E-01 | 15.15   | 10.00  | 1.30E-01 | 1.47   | 16.34 | 9.28E-01 | 16.21  | 10.10 | 1.08E-01 |
| cg17828223 | -44.02 | 17.94 | 1.41E-02 | -104.87 | 68.58 | 1.26E-01 | -73.89  | 283.53 | 7.94E-01 | -38.17 | 19.33 | 4.83E-02 | -55.47 | 69.79 | 4.27E-01 |
| cg22760295 | 41.83  | 17.05 | 1.41E-02 | -8.17   | 52.65 | 8.77E-01 | 111.56  | 203.23 | 5.83E-01 | 41.10  | 19.14 | 3.18E-02 | 97.80  | 55.27 | 7.68E-02 |
| cg19940482 | -11.19 | 4.56  | 1.41E-02 | -18.24  | 6.78  | 7.19E-03 | -4.99   | 10.94  | 6.48E-01 | -1.56  | 13.31 | 9.07E-01 | -7.39  | 8.98  | 4.11E-01 |
| cg00386338 | -53.20 | 21.68 | 1.41E-02 | -43.52  | 29.34 | 1.38E-01 | 10.90   | 82.53  | 8.95E-01 | -3.55  | 76.86 | 9.63E-01 | -97.93 | 39.24 | 1.26E-02 |
| cg10233401 | -17.07 | 6.96  | 1.41E-02 | -21.18  | 19.39 | 2.75E-01 | -16.91  | 24.78  | 4.95E-01 | -17.51 | 8.22  | 3.32E-02 | -6.24  | 25.08 | 8.03E-01 |
| cg24494102 | -8.55  | 3.49  | 1.41E-02 | -13.59  | 6.53  | 3.74E-02 | -6.79   | 11.00  | 5.37E-01 | -7.91  | 5.19  | 1.28E-01 | -2.65  | 8.61  | 7.58E-01 |
| cg20052509 | 27.39  | 11.16 | 1.42E-02 | 36.64   | 15.98 | 2.18E-02 | 5.29    | 25.33  | 8.35E-01 | -3.15  | 30.14 | 9.17E-01 | 49.41  | 26.30 | 6.03E-02 |
| cg26843469 | -29.91 | 12.19 | 1.42E-02 | -31.05  | 28.98 | 2.84E-01 | -25.95  | 107.89 | 8.10E-01 | -31.13 | 14.72 | 3.44E-02 | -21.94 | 34.66 | 5.27E-01 |
| cg01223697 | 20.86  | 8.50  | 1.42E-02 | 25.29   | 21.82 | 2.46E-01 | 34.38   | 28.85  | 2.33E-01 | 19.29  | 10.13 | 5.70E-02 | 7.94   | 35.65 | 8.24E-01 |
| cg21654404 | 18.47  | 7.53  | 1.42E-02 | 29.34   | 15.21 | 5.37E-02 | -5.48   | 24.63  | 8.24E-01 | 14.60  | 10.21 | 1.53E-01 | 32.67  | 21.92 | 1.36E-01 |
| cg15049964 | -41.44 | 16.89 | 1.42E-02 | -32.46  | 23.34 | 1.64E-01 | -38.92  | 47.43  | 4.12E-01 | -52.20 | 43.55 | 2.31E-01 | -58.60 | 37.90 | 1.22E-01 |
| cg01089858 | -14.31 | 5.83  | 1.42E-02 | -17.14  | 9.35  | 6.68E-02 | -25.15  | 13.67  | 6.57E-02 | -16.38 | 12.91 | 2.04E-01 | 1.26   | 12.30 | 9.18E-01 |
| cg13812377 | 23.40  | 9.54  | 1.42E-02 | -7.44   | 31.59 | 8.14E-01 | 22.77   | 130.57 | 8.62E-01 | 27.50  | 10.42 | 8.29E-03 | 13.79  | 37.57 | 7.14E-01 |
| cg09661503 | -37.14 | 15.14 | 1.42E-02 | -39.03  | 18.58 | 3.57E-02 | -86.16  | 31.94  | 6.98E-03 | -12.11 | 6.63  | 6.76E-02 | -48.53 | 25.45 | 5.66E-02 |
| cg18898992 | 16.71  | 6.81  | 1.42E-02 | 23.54   | 11.11 | 3.41E-02 | 29.10   | 14.81  | 4.94E-02 | -1.00  | 12.58 | 9.36E-01 | 16.73  | 18.07 | 3.55E-01 |
| cg07466320 | 21.38  | 8.72  | 1.42E-02 | 22.63   | 14.56 | 1.20E-01 | 19.19   | 16.50  | 2.45E-01 | 27.59  | 20.05 | 1.69E-01 | 15.57  | 20.95 | 4.57E-01 |
| cg19126615 | 12.18  | 4.97  | 1.42E-02 | 13.46   | 6.32  | 3.32E-02 | 22.72   | 9.81   | 2.05E-02 | -8.05  | 14.32 | 5.74E-01 | 7.79   | 11.62 | 5.03E-01 |
| cg27410136 | 16.43  | 6.70  | 1.42E-02 | 17.59   | 11.95 | 1.41E-01 | 20.79   | 14.15  | 1.42E-01 | 12.31  | 11.54 | 2.86E-01 | 16.83  | 19.05 | 3.77E-01 |
| cg24316515 | 13.87  | 5.66  | 1.42E-02 | 11.14   | 9.20  | 2.26E-01 | 0.66    | 20.28  | 9.74E-01 | 20.82  | 10.03 | 3.78E-02 | 13.21  | 11.92 | 2.68E-01 |
| cg14784617 | -42.30 | 17.25 | 1.42E-02 | -28.60  | 21.98 | 1.93E-01 | -76.13  | 50.06  | 1.28E-01 | -20.26 | 82.15 | 8.05E-01 | -66.68 | 36.68 | 6.91E-02 |
| cg06050193 | -18.45 | 7.53  | 1.42E-02 | -13.65  | 19.76 | 4.90E-01 | -52.26  | 48.91  | 2.85E-01 | -15.13 | 8.58  | 7.77E-02 | -58.24 | 30.32 | 5.47E-02 |
| cg00852675 | -12.24 | 4.99  | 1.42E-02 | -10.30  | 6.46  | 1.11E-01 | -8.35   | 20.03  | 6.77E-01 | -22.81 | 12.80 | 7.48E-02 | -11.13 | 11.49 | 3.33E-01 |



|            |        |       |          |        |       |          |         |        |          |        |       |          |         |       |          |
|------------|--------|-------|----------|--------|-------|----------|---------|--------|----------|--------|-------|----------|---------|-------|----------|
| cg04222027 | 55.71  | 22.72 | 1.42E-02 | 46.38  | 29.05 | 1.10E-01 | -73.52  | 177.15 | 6.78E-01 | 76.16  | 83.46 | 3.61E-01 | 76.91   | 41.64 | 6.48E-02 |
| cg27234067 | 24.52  | 10.00 | 1.42E-02 | 40.73  | 21.27 | 5.55E-02 | 24.45   | 24.82  | 3.25E-01 | 28.98  | 15.01 | 5.35E-02 | -7.60   | 24.05 | 7.52E-01 |
| cg01714172 | 21.04  | 8.58  | 1.42E-02 | 23.81  | 16.87 | 1.58E-01 | 12.26   | 16.60  | 4.60E-01 | 21.60  | 14.41 | 1.34E-01 | 33.02   | 24.84 | 1.84E-01 |
| cg04229487 | -18.71 | 7.63  | 1.42E-02 | -27.18 | 13.67 | 4.68E-02 | -33.69  | 18.36  | 6.65E-02 | -12.66 | 12.69 | 3.18E-01 | 1.09    | 19.48 | 9.55E-01 |
| cg22380921 | 12.67  | 5.17  | 1.42E-02 | 20.30  | 8.38  | 1.54E-02 | 3.17    | 11.97  | 7.91E-01 | 18.91  | 14.27 | 1.85E-01 | 6.21    | 9.42  | 5.10E-01 |
| cg09769104 | -12.52 | 5.11  | 1.42E-02 | -12.04 | 12.19 | 3.23E-01 | -26.96  | 24.96  | 2.80E-01 | -11.04 | 6.15  | 7.26E-02 | -17.97  | 16.79 | 2.84E-01 |
| cg24274090 | -9.24  | 3.77  | 1.42E-02 | -18.40 | 7.65  | 1.62E-02 | -8.60   | 10.07  | 3.93E-01 | -5.49  | 5.48  | 3.17E-01 | -6.74   | 9.93  | 4.97E-01 |
| cg26688762 | 8.09   | 3.30  | 1.42E-02 | 5.05   | 4.98  | 3.10E-01 | 14.62   | 6.81   | 3.18E-02 | 16.69  | 8.43  | 4.78E-02 | 2.03    | 6.33  | 7.49E-01 |
| cg01804452 | 36.31  | 14.81 | 1.42E-02 | 52.21  | 20.52 | 1.09E-02 | 1.25    | 31.07  | 9.68E-01 | 48.80  | 47.26 | 3.02E-01 | 26.19   | 37.85 | 4.89E-01 |
| cg01407748 | 17.56  | 7.16  | 1.42E-02 | 16.47  | 14.37 | 2.52E-01 | 13.39   | 26.63  | 6.15E-01 | 12.14  | 9.81  | 2.16E-01 | 41.31   | 18.77 | 2.77E-02 |
| cg09234698 | 13.30  | 5.43  | 1.42E-02 | 19.01  | 14.48 | 1.89E-01 | 4.87    | 21.33  | 8.19E-01 | 13.36  | 6.39  | 3.66E-02 | 9.31    | 20.07 | 6.43E-01 |
| cg12037129 | 21.62  | 8.82  | 1.42E-02 | 36.89  | 18.24 | 4.31E-02 | 3.92    | 36.66  | 9.15E-01 | 12.52  | 11.57 | 2.79E-01 | 43.24   | 24.76 | 8.07E-02 |
| cg15769920 | 29.82  | 12.17 | 1.42E-02 | 40.16  | 14.17 | 4.59E-03 | -32.13  | 49.31  | 5.15E-01 | -13.39 | 69.16 | 8.46E-01 | 15.10   | 29.42 | 6.08E-01 |
| cg26495839 | 16.60  | 6.77  | 1.43E-02 | 27.75  | 10.43 | 7.79E-03 | 12.99   | 13.01  | 3.18E-01 | -7.54  | 26.72 | 7.78E-01 | 7.65    | 13.75 | 5.78E-01 |
| cg03196627 | 45.66  | 18.63 | 1.43E-02 | 35.68  | 23.60 | 1.31E-01 | 148.73  | 77.29  | 5.43E-02 | 21.64  | 56.56 | 7.02E-01 | 59.13   | 40.64 | 1.46E-01 |
| cg19954205 | -26.72 | 10.90 | 1.43E-02 | -43.50 | 19.14 | 2.30E-02 | -26.48  | 39.39  | 5.01E-01 | -10.42 | 16.46 | 5.26E-01 | -37.44  | 27.23 | 1.69E-01 |
| cg25815682 | 9.00   | 3.67  | 1.43E-02 | 6.14   | 7.27  | 3.99E-01 | 3.49    | 8.14   | 6.68E-01 | 12.20  | 5.63  | 3.02E-02 | 13.28   | 10.82 | 2.20E-01 |
| cg22031392 | 26.84  | 10.95 | 1.43E-02 | 7.06   | 28.56 | 8.05E-01 | -34.66  | 121.12 | 7.75E-01 | 30.23  | 12.53 | 1.58E-02 | 36.98   | 38.59 | 3.38E-01 |
| cg11919525 | -10.83 | 4.42  | 1.43E-02 | -8.93  | 16.47 | 5.88E-01 | -4.83   | 7.54   | 5.21E-01 | 48.81  | 43.11 | 2.58E-01 | -14.91  | 4.75  | 1.70E-03 |
| cg16624013 | -34.78 | 14.19 | 1.43E-02 | -34.17 | 19.00 | 7.21E-02 | 3.90    | 38.26  | 9.19E-01 | -22.50 | 54.28 | 6.78E-01 | -62.37  | 29.23 | 3.29E-02 |
| cg14828484 | -52.62 | 21.48 | 1.43E-02 | -89.72 | 57.04 | 1.16E-01 | -385.84 | 250.07 | 1.23E-01 | -42.24 | 24.80 | 8.86E-02 | -53.32  | 67.55 | 4.30E-01 |
| cg04501217 | 20.87  | 8.52  | 1.43E-02 | 30.36  | 15.31 | 4.73E-02 | 18.78   | 16.90  | 2.66E-01 | 23.41  | 15.16 | 1.23E-01 | -5.65   | 24.49 | 8.18E-01 |
| cg08367465 | 21.75  | 8.88  | 1.43E-02 | 19.23  | 13.16 | 1.44E-01 | 17.19   | 16.85  | 3.08E-01 | 55.38  | 28.47 | 5.17E-02 | 16.71   | 21.50 | 4.37E-01 |
| cg19628343 | 19.97  | 8.15  | 1.43E-02 | 26.46  | 20.67 | 2.01E-01 | 0.02    | 26.10  | 9.99E-01 | 20.29  | 10.00 | 4.25E-02 | 28.64   | 28.26 | 3.11E-01 |
| cg12169512 | 47.47  | 19.37 | 1.43E-02 | 25.50  | 46.12 | 5.80E-01 | -45.69  | 183.31 | 8.03E-01 | 51.09  | 22.91 | 2.57E-02 | 71.34   | 62.09 | 2.51E-01 |
| cg00256046 | 5.12   | 2.09  | 1.43E-02 | 2.78   | 3.99  | 4.86E-01 | 2.85    | 5.16   | 5.80E-01 | 6.95   | 3.24  | 3.18E-02 | 6.83    | 5.48  | 2.12E-01 |
| cg07565956 | 11.58  | 4.73  | 1.43E-02 | 12.42  | 6.05  | 4.01E-02 | 10.98   | 12.12  | 3.65E-01 | 26.96  | 14.58 | 6.45E-02 | -3.80   | 12.99 | 7.70E-01 |
| cg09876519 | 13.45  | 5.49  | 1.43E-02 | 17.86  | 9.00  | 4.72E-02 | 8.24    | 13.99  | 5.56E-01 | 24.28  | 12.51 | 5.22E-02 | 3.04    | 10.36 | 7.69E-01 |
| cg12898512 | 17.39  | 7.10  | 1.43E-02 | 23.97  | 18.58 | 1.97E-01 | 12.95   | 29.11  | 6.56E-01 | 16.20  | 8.39  | 5.35E-02 | 19.39   | 25.32 | 4.44E-01 |
| cg25465322 | 11.51  | 4.70  | 1.43E-02 | 15.86  | 7.53  | 3.53E-02 | 14.96   | 9.62   | 1.20E-01 | 16.97  | 12.37 | 1.70E-01 | -2.98   | 9.85  | 7.62E-01 |
| cg05269784 | 6.62   | 2.70  | 1.43E-02 | 5.72   | 3.69  | 1.21E-01 | 6.88    | 6.55   | 2.93E-01 | 10.01  | 9.50  | 2.92E-01 | 7.44    | 5.90  | 2.07E-01 |
| cg16301857 | 42.35  | 17.29 | 1.43E-02 | 46.40  | 19.71 | 1.85E-02 | -34.13  | 99.54  | 7.32E-01 | 59.29  | 67.73 | 3.81E-01 | 28.15   | 47.00 | 5.49E-01 |
| cg02267488 | -18.33 | 7.48  | 1.43E-02 | -9.99  | 14.37 | 4.87E-01 | -14.93  | 18.22  | 4.13E-01 | -23.65 | 11.77 | 4.45E-02 | -22.69  | 18.92 | 2.30E-01 |
| cg22309826 | -45.84 | 18.71 | 1.43E-02 | -34.44 | 23.89 | 1.49E-01 | -49.86  | 58.21  | 3.92E-01 | 0.70   | 60.31 | 9.91E-01 | -104.90 | 43.26 | 1.53E-02 |
| cg01985106 | -11.98 | 4.89  | 1.43E-02 | -22.25 | 10.55 | 3.49E-02 | -1.82   | 12.73  | 8.87E-01 | -11.73 | 6.67  | 7.86E-02 | -6.23   | 15.54 | 6.89E-01 |

|            |        |       |          |        |       |          |         |        |          |         |       |          |        |       |          |
|------------|--------|-------|----------|--------|-------|----------|---------|--------|----------|---------|-------|----------|--------|-------|----------|
| cg18569661 | 14.32  | 5.85  | 1.43E-02 | 11.87  | 8.27  | 1.51E-01 | 27.54   | 12.32  | 2.54E-02 | 15.09   | 20.04 | 4.52E-01 | 4.77   | 13.40 | 7.22E-01 |
| cg08933505 | 21.48  | 8.77  | 1.43E-02 | 38.85  | 24.62 | 1.15E-01 | 1.25    | 43.24  | 9.77E-01 | 20.32   | 10.57 | 5.46E-02 | 17.50  | 23.14 | 4.50E-01 |
| cg18317135 | 11.74  | 4.79  | 1.43E-02 | 10.50  | 6.80  | 1.23E-01 | 17.32   | 8.47   | 4.09E-02 | 18.46   | 21.36 | 3.87E-01 | 0.41   | 13.13 | 9.75E-01 |
| cg01392351 | -14.28 | 5.83  | 1.43E-02 | -19.84 | 15.48 | 2.00E-01 | 1.54    | 27.14  | 9.55E-01 | -13.10  | 6.79  | 5.37E-02 | -24.95 | 21.21 | 2.39E-01 |
| cg08246659 | 19.44  | 7.94  | 1.43E-02 | 22.48  | 17.99 | 2.11E-01 | -38.01  | 37.61  | 3.12E-01 | 23.30   | 9.77  | 1.71E-02 | 13.73  | 24.91 | 5.82E-01 |
| cg25016308 | -15.12 | 6.18  | 1.43E-02 | -15.47 | 18.30 | 3.98E-01 | 6.46    | 24.95  | 7.96E-01 | -16.38  | 7.01  | 1.94E-02 | -21.38 | 27.94 | 4.44E-01 |
| cg24889694 | -15.28 | 6.24  | 1.43E-02 | -19.54 | 17.94 | 2.76E-01 | 9.95    | 35.49  | 7.79E-01 | -16.77  | 7.01  | 1.67E-02 | 1.42   | 26.60 | 9.58E-01 |
| cg06421238 | -71.49 | 29.19 | 1.43E-02 | -64.57 | 38.61 | 9.44E-02 | 2.25    | 126.04 | 9.86E-01 | -118.42 | 71.14 | 9.60E-02 | -71.53 | 64.28 | 2.66E-01 |
| cg05559643 | -10.06 | 4.11  | 1.43E-02 | -6.63  | 8.40  | 4.30E-01 | -7.52   | 14.82  | 6.12E-01 | -12.35  | 5.57  | 2.67E-02 | -8.45  | 10.95 | 4.40E-01 |
| cg17658266 | -9.71  | 3.97  | 1.43E-02 | -15.66 | 9.79  | 1.10E-01 | 9.66    | 14.23  | 4.98E-01 | -10.89  | 4.94  | 2.76E-02 | -7.69  | 11.70 | 5.11E-01 |
| cg25704407 | -54.33 | 22.19 | 1.43E-02 | -56.42 | 29.43 | 5.52E-02 | 47.35   | 92.76  | 6.10E-01 | -16.24  | 59.33 | 7.84E-01 | -96.78 | 45.82 | 3.46E-02 |
| cg20360947 | 18.43  | 7.53  | 1.43E-02 | -0.38  | 24.07 | 9.87E-01 | 29.40   | 29.23  | 3.15E-01 | 20.14   | 8.49  | 1.77E-02 | 13.84  | 33.54 | 6.80E-01 |
| cg15761609 | 23.57  | 9.62  | 1.43E-02 | 23.25  | 12.48 | 6.24E-02 | 47.22   | 34.27  | 1.68E-01 | 6.02    | 39.98 | 8.80E-01 | 21.10  | 18.58 | 2.56E-01 |
| cg14597281 | -25.69 | 10.49 | 1.43E-02 | -22.65 | 16.34 | 1.66E-01 | -9.75   | 29.21  | 7.39E-01 | -43.26  | 20.45 | 3.44E-02 | -18.97 | 23.73 | 4.24E-01 |
| cg11943190 | -17.71 | 7.23  | 1.43E-02 | -12.29 | 14.41 | 3.94E-01 | -1.00   | 31.98  | 9.75E-01 | -25.12  | 9.27  | 6.71E-03 | 8.49   | 24.46 | 7.29E-01 |
| cg04290563 | 16.91  | 6.91  | 1.43E-02 | 33.64  | 13.83 | 1.50E-02 | -11.84  | 38.64  | 7.59E-01 | 13.14   | 8.82  | 1.36E-01 | 7.92   | 21.31 | 7.10E-01 |
| cg07807481 | 20.62  | 8.42  | 1.44E-02 | 34.23  | 14.33 | 1.69E-02 | 14.86   | 15.91  | 3.50E-01 | -2.41   | 18.28 | 8.95E-01 | 31.69  | 20.91 | 1.30E-01 |
| cg22029824 | -49.95 | 20.40 | 1.44E-02 | -73.16 | 59.85 | 2.22E-01 | 212.41  | 254.66 | 4.04E-01 | -45.09  | 23.43 | 5.43E-02 | -72.30 | 59.08 | 2.21E-01 |
| cg17445007 | -31.07 | 12.69 | 1.44E-02 | -41.32 | 36.98 | 2.64E-01 | -42.33  | 130.73 | 7.46E-01 | -35.56  | 14.13 | 1.19E-02 | 43.22  | 49.24 | 3.80E-01 |
| cg21512817 | 24.15  | 9.87  | 1.44E-02 | 38.38  | 20.72 | 6.39E-02 | 23.09   | 37.48  | 5.38E-01 | 17.67   | 12.76 | 1.66E-01 | 30.96  | 30.31 | 3.07E-01 |
| cg04745336 | -13.18 | 5.38  | 1.44E-02 | -19.39 | 10.05 | 5.37E-02 | 5.24    | 15.89  | 7.41E-01 | -18.27  | 7.40  | 1.36E-02 | 0.32   | 13.70 | 9.81E-01 |
| cg21609706 | -10.30 | 4.21  | 1.44E-02 | -17.34 | 9.71  | 7.41E-02 | -16.51  | 20.52  | 4.21E-01 | -5.60   | 5.25  | 2.86E-01 | -21.45 | 11.74 | 6.78E-02 |
| cg13523125 | 7.75   | 3.17  | 1.44E-02 | 8.09   | 4.41  | 6.63E-02 | 11.45   | 7.36   | 1.20E-01 | 8.74    | 8.38  | 2.97E-01 | 1.33   | 8.02  | 8.69E-01 |
| cg13252730 | -8.82  | 3.60  | 1.44E-02 | -6.10  | 5.85  | 2.97E-01 | -10.45  | 7.68   | 1.74E-01 | -9.88   | 7.39  | 1.82E-01 | -11.38 | 8.90  | 2.01E-01 |
| cg22677065 | 29.68  | 12.13 | 1.44E-02 | 31.67  | 25.79 | 2.20E-01 | 35.91   | 42.28  | 3.96E-01 | 24.05   | 15.96 | 1.32E-01 | 48.94  | 35.07 | 1.63E-01 |
| cg13732465 | 15.42  | 6.30  | 1.44E-02 | 9.20   | 8.81  | 2.97E-01 | 24.96   | 13.18  | 5.83E-02 | 3.60    | 19.64 | 8.55E-01 | 29.49  | 15.87 | 6.31E-02 |
| cg25549230 | -43.51 | 17.77 | 1.44E-02 | -44.78 | 20.72 | 3.07E-02 | -129.54 | 97.84  | 1.86E-01 | 6.14    | 82.09 | 9.40E-01 | -35.66 | 41.38 | 3.89E-01 |
| cg24810917 | -10.71 | 4.38  | 1.44E-02 | -14.06 | 6.29  | 2.53E-02 | -10.34  | 10.16  | 3.09E-01 | 4.86    | 13.50 | 7.19E-01 | -11.08 | 9.23  | 2.30E-01 |
| cg24090202 | 22.39  | 9.15  | 1.44E-02 | 9.22   | 14.21 | 5.17E-01 | 11.86   | 38.05  | 7.55E-01 | 69.24   | 51.93 | 1.82E-01 | 31.66  | 12.98 | 1.47E-02 |
| cg23900696 | -18.53 | 7.57  | 1.44E-02 | -23.15 | 18.00 | 1.98E-01 | -10.80  | 25.37  | 6.70E-01 | -16.43  | 9.51  | 8.41E-02 | -30.49 | 23.89 | 2.02E-01 |
| cg10707565 | 18.02  | 7.36  | 1.44E-02 | -1.81  | 17.29 | 9.17E-01 | 5.80    | 24.52  | 8.13E-01 | 26.05   | 9.15  | 4.41E-03 | 11.76  | 25.91 | 6.50E-01 |
| cg11739225 | 47.49  | 19.40 | 1.44E-02 | 46.40  | 52.45 | 3.76E-01 | -216.60 | 211.52 | 3.06E-01 | 53.94   | 22.00 | 1.42E-02 | 12.99  | 70.04 | 8.53E-01 |
| cg10798815 | 14.26  | 5.83  | 1.44E-02 | 18.71  | 7.62  | 1.41E-02 | 12.50   | 22.46  | 5.78E-01 | 27.28   | 21.36 | 2.02E-01 | 1.64   | 11.15 | 8.83E-01 |
| cg22971216 | -8.54  | 3.49  | 1.44E-02 | -9.96  | 4.30  | 2.05E-02 | -16.72  | 9.66   | 8.35E-02 | 3.83    | 22.95 | 8.67E-01 | 0.63   | 8.07  | 9.38E-01 |
| cg06912964 | 19.61  | 8.01  | 1.44E-02 | 26.30  | 12.44 | 3.45E-02 | 14.47   | 15.65  | 3.55E-01 | 0.73    | 19.27 | 9.70E-01 | 31.83  | 20.68 | 1.24E-01 |

|            |        |       |          |         |       |          |         |        |          |        |        |          |        |       |          |
|------------|--------|-------|----------|---------|-------|----------|---------|--------|----------|--------|--------|----------|--------|-------|----------|
| cg02645368 | -9.63  | 3.94  | 1.44E-02 | -7.84   | 5.48  | 1.53E-01 | -15.76  | 10.38  | 1.29E-01 | -11.73 | 9.16   | 2.00E-01 | -7.42  | 9.94  | 4.55E-01 |
| cg24278165 | -19.22 | 7.85  | 1.44E-02 | -18.94  | 12.59 | 1.32E-01 | 6.12    | 39.39  | 8.77E-01 | -19.51 | 15.97  | 2.22E-01 | -22.40 | 13.70 | 1.02E-01 |
| cg13998945 | -14.02 | 5.73  | 1.44E-02 | -18.04  | 11.08 | 1.04E-01 | 4.80    | 17.27  | 7.81E-01 | -20.60 | 8.73   | 1.83E-02 | -4.42  | 13.10 | 7.36E-01 |
| cg03410903 | 41.41  | 16.92 | 1.44E-02 | 5.41    | 50.14 | 9.14E-01 | -154.20 | 185.32 | 4.05E-01 | 46.40  | 18.81  | 1.36E-02 | 66.26  | 64.79 | 3.06E-01 |
| cg08690664 | 20.39  | 8.33  | 1.44E-02 | 24.24   | 16.81 | 1.49E-01 | 24.44   | 22.14  | 2.70E-01 | 15.87  | 11.46  | 1.66E-01 | 30.75  | 28.77 | 2.85E-01 |
| cg24366913 | 60.92  | 24.90 | 1.44E-02 | 69.73   | 31.87 | 2.87E-02 | -17.59  | 95.14  | 8.53E-01 | 15.51  | 104.76 | 8.82E-01 | 70.63  | 48.42 | 1.45E-01 |
| cg10987840 | -13.09 | 5.35  | 1.44E-02 | -26.17  | 10.74 | 1.48E-02 | -14.60  | 18.06  | 4.19E-01 | -7.79  | 7.11   | 2.73E-01 | -9.20  | 17.09 | 5.91E-01 |
| cg02687418 | -5.41  | 2.21  | 1.44E-02 | -5.49   | 3.24  | 9.00E-02 | -10.11  | 4.82   | 3.61E-02 | 0.55   | 8.79   | 9.50E-01 | -2.92  | 4.33  | 5.00E-01 |
| cg05781826 | -45.48 | 18.59 | 1.44E-02 | -57.90  | 22.49 | 1.00E-02 | -17.27  | 96.86  | 8.59E-01 | -58.51 | 56.56  | 3.01E-01 | 6.00   | 44.82 | 8.94E-01 |
| cg05885688 | -11.20 | 4.58  | 1.44E-02 | -14.22  | 9.69  | 1.42E-01 | -31.82  | 18.60  | 8.70E-02 | -6.66  | 5.97   | 2.65E-01 | -16.93 | 12.74 | 1.84E-01 |
| cg08017233 | -17.66 | 7.22  | 1.44E-02 | -35.18  | 18.34 | 5.51E-02 | 24.26   | 37.80  | 5.21E-01 | -16.48 | 8.48   | 5.21E-02 | -13.80 | 24.84 | 5.79E-01 |
| cg25094081 | -21.16 | 8.65  | 1.44E-02 | -18.16  | 19.25 | 3.46E-01 | 17.55   | 49.04  | 7.20E-01 | -23.69 | 10.41  | 2.29E-02 | -22.04 | 31.26 | 4.81E-01 |
| cg18704047 | -11.10 | 4.54  | 1.44E-02 | -22.93  | 8.73  | 8.59E-03 | -7.29   | 11.78  | 5.36E-01 | -4.58  | 6.97   | 5.11E-01 | -11.92 | 11.43 | 2.97E-01 |
| cg03323092 | -47.86 | 19.56 | 1.44E-02 | -126.84 | 58.08 | 2.90E-02 | -241.02 | 239.83 | 3.15E-01 | -36.87 | 22.23  | 9.73E-02 | -31.41 | 60.23 | 6.02E-01 |
| cg00247361 | 19.76  | 8.08  | 1.44E-02 | 26.33   | 15.67 | 9.29E-02 | 29.87   | 24.65  | 2.26E-01 | 13.91  | 11.59  | 2.30E-01 | 19.84  | 21.48 | 3.56E-01 |
| cg14839558 | -16.10 | 6.58  | 1.44E-02 | -13.00  | 9.11  | 1.53E-01 | -0.43   | 18.43  | 9.81E-01 | -38.30 | 15.01  | 1.07E-02 | -12.61 | 14.73 | 3.92E-01 |
| cg16996788 | 12.42  | 5.08  | 1.44E-02 | 12.12   | 5.10  | 1.74E-02 | 2.82    | 6.84   | 6.80E-01 | 31.96  | 10.15  | 1.64E-03 | 9.49   | 8.54  | 2.66E-01 |
| cg08601673 | 10.79  | 4.41  | 1.44E-02 | 11.43   | 6.33  | 7.11E-02 | 16.06   | 9.97   | 1.07E-01 | 17.43  | 14.52  | 2.30E-01 | 2.17   | 9.27  | 8.15E-01 |
| cg00882281 | -6.63  | 2.71  | 1.44E-02 | -6.58   | 5.28  | 2.13E-01 | 2.72    | 11.52  | 8.14E-01 | -9.34  | 3.80   | 1.40E-02 | -1.74  | 6.51  | 7.89E-01 |
| cg03680932 | -24.64 | 10.07 | 1.45E-02 | -31.35  | 15.07 | 3.75E-02 | -37.26  | 54.05  | 4.91E-01 | -23.12 | 16.41  | 1.59E-01 | -4.39  | 26.77 | 8.70E-01 |
| cg08632659 | -36.18 | 14.79 | 1.45E-02 | -31.28  | 36.96 | 3.97E-01 | -16.35  | 192.94 | 9.32E-01 | -37.75 | 16.77  | 2.44E-02 | -30.54 | 62.59 | 6.26E-01 |
| cg04834436 | 14.52  | 5.94  | 1.45E-02 | 20.54   | 9.35  | 2.81E-02 | 10.50   | 15.25  | 4.91E-01 | 15.37  | 13.97  | 2.71E-01 | 7.08   | 11.53 | 5.39E-01 |
| cg25218152 | 6.10   | 2.49  | 1.45E-02 | 1.66    | 3.34  | 6.19E-01 | 11.06   | 5.30   | 3.68E-02 | 10.02  | 4.55   | 2.79E-02 | 5.37   | 7.72  | 4.87E-01 |
| cg25967745 | -38.03 | 15.55 | 1.45E-02 | -56.98  | 24.73 | 2.13E-02 | 15.35   | 59.11  | 7.95E-01 | -37.36 | 27.54  | 1.75E-01 | -21.48 | 33.43 | 5.21E-01 |
| cg01089498 | 13.99  | 5.72  | 1.45E-02 | 21.11   | 13.90 | 1.29E-01 | 20.37   | 17.64  | 2.48E-01 | 13.70  | 7.98   | 8.61E-02 | 5.83   | 12.43 | 6.39E-01 |
| cg14592284 | 21.00  | 8.59  | 1.45E-02 | -5.70   | 20.98 | 7.86E-01 | 11.24   | 58.45  | 8.48E-01 | 25.23  | 10.02  | 1.18E-02 | 41.51  | 30.97 | 1.80E-01 |
| cg06994016 | -5.73  | 2.34  | 1.45E-02 | -6.32   | 3.30  | 5.54E-02 | -3.22   | 4.47   | 4.71E-01 | -4.27  | 9.24   | 6.44E-01 | -8.85  | 5.93  | 1.36E-01 |
| cg00099976 | 17.36  | 7.10  | 1.45E-02 | 24.49   | 12.24 | 4.53E-02 | 4.19    | 16.42  | 7.99E-01 | 17.87  | 14.75  | 2.26E-01 | 17.14  | 14.36 | 2.33E-01 |
| cg09423651 | -14.39 | 5.89  | 1.45E-02 | -12.37  | 16.68 | 4.58E-01 | 12.60   | 28.26  | 6.56E-01 | -16.90 | 6.80   | 1.30E-02 | -8.93  | 20.39 | 6.61E-01 |
| cg09389824 | -10.51 | 4.30  | 1.45E-02 | -9.12   | 6.69  | 1.73E-01 | -11.80  | 9.55   | 2.16E-01 | -6.95  | 10.89  | 5.23E-01 | -14.29 | 8.98  | 1.12E-01 |
| cg00555905 | 11.76  | 4.81  | 1.45E-02 | 16.98   | 8.82  | 5.42E-02 | 16.16   | 12.28  | 1.88E-01 | 9.11   | 8.60   | 2.89E-01 | 5.85   | 9.88  | 5.54E-01 |
| cg23082067 | -45.65 | 18.67 | 1.45E-02 | -48.43  | 23.86 | 4.24E-02 | -22.79  | 54.43  | 6.75E-01 | -17.27 | 72.36  | 8.11E-01 | -59.78 | 41.38 | 1.49E-01 |
| cg15705062 | 103.62 | 42.38 | 1.45E-02 | 105.80  | 58.29 | 6.95E-02 | 354.29  | 237.96 | 1.37E-01 | 14.82  | 115.59 | 8.98E-01 | 112.91 | 76.72 | 1.41E-01 |
| cg04089901 | 6.75   | 2.76  | 1.45E-02 | 5.41    | 3.60  | 1.33E-01 | 13.92   | 6.55   | 3.36E-02 | 10.87  | 8.78   | 2.16E-01 | 0.21   | 7.44  | 9.78E-01 |
| cg16732970 | 54.61  | 22.34 | 1.45E-02 | 53.60   | 50.67 | 2.90E-01 | 133.68  | 191.58 | 4.85E-01 | 65.52  | 26.88  | 1.48E-02 | -28.44 | 70.19 | 6.85E-01 |

|            |        |       |          |        |       |          |        |       |          |        |       |          |        |       |          |
|------------|--------|-------|----------|--------|-------|----------|--------|-------|----------|--------|-------|----------|--------|-------|----------|
| cg01597373 | -10.39 | 4.25  | 1.45E-02 | -6.19  | 5.91  | 2.95E-01 | -9.35  | 11.70 | 4.24E-01 | -13.45 | 14.13 | 3.41E-01 | -18.18 | 8.32  | 2.90E-02 |
| cg04738700 | 22.56  | 9.23  | 1.45E-02 | 34.72  | 17.26 | 4.42E-02 | 6.70   | 17.50 | 7.02E-01 | 24.66  | 16.74 | 1.41E-01 | 24.81  | 25.41 | 3.29E-01 |
| cg01659184 | -14.76 | 6.04  | 1.45E-02 | -15.52 | 10.99 | 1.58E-01 | -15.58 | 12.16 | 2.00E-01 | -6.52  | 11.65 | 5.76E-01 | -24.46 | 14.10 | 8.27E-02 |
| cg02454536 | 8.54   | 3.49  | 1.45E-02 | 7.85   | 5.59  | 1.61E-01 | 15.24  | 6.85  | 2.61E-02 | 0.67   | 7.50  | 9.29E-01 | 10.34  | 9.60  | 2.81E-01 |
| cg16900796 | -9.44  | 3.86  | 1.45E-02 | -12.11 | 7.10  | 8.80E-02 | -0.62  | 11.93 | 9.59E-01 | -8.92  | 5.97  | 1.35E-01 | -11.40 | 9.09  | 2.10E-01 |
| cg26193015 | 11.50  | 4.70  | 1.45E-02 | 6.07   | 9.15  | 5.07E-01 | 27.71  | 10.39 | 7.64E-03 | 7.79   | 5.73  | 1.74E-01 | 17.95  | 25.80 | 4.87E-01 |
| cg13692446 | 13.10  | 5.36  | 1.45E-02 | 23.61  | 15.05 | 1.17E-01 | 33.56  | 25.24 | 1.84E-01 | 8.79   | 6.41  | 1.70E-01 | 18.99  | 14.93 | 2.03E-01 |
| cg04162153 | -11.02 | 4.51  | 1.45E-02 | -5.65  | 9.57  | 5.55E-01 | -12.45 | 10.38 | 2.31E-01 | -12.48 | 6.67  | 6.14E-02 | -13.00 | 12.40 | 2.94E-01 |
| cg05402319 | -12.29 | 5.03  | 1.45E-02 | -15.46 | 7.46  | 3.82E-02 | 8.70   | 13.46 | 5.18E-01 | -16.24 | 12.60 | 1.97E-01 | -15.76 | 10.12 | 1.19E-01 |
| cg13273396 | 15.18  | 6.21  | 1.45E-02 | 10.99  | 8.72  | 2.07E-01 | 44.10  | 28.03 | 1.16E-01 | 21.79  | 26.00 | 4.02E-01 | 16.02  | 9.98  | 1.09E-01 |
| cg12084925 | 25.66  | 10.50 | 1.45E-02 | 25.05  | 19.86 | 2.07E-01 | 33.33  | 22.75 | 1.43E-01 | 30.39  | 17.07 | 7.51E-02 | 0.59   | 29.15 | 9.84E-01 |
| cg16151082 | 18.46  | 7.55  | 1.45E-02 | 30.24  | 14.94 | 4.29E-02 | -2.67  | 17.30 | 8.77E-01 | 23.73  | 12.05 | 4.89E-02 | 11.90  | 18.86 | 5.28E-01 |
| cg19269511 | 17.67  | 7.23  | 1.45E-02 | 14.91  | 11.46 | 1.93E-01 | 10.99  | 18.78 | 5.58E-01 | 12.72  | 16.75 | 4.47E-01 | 28.94  | 13.98 | 3.85E-02 |
| cg09123307 | 20.49  | 8.38  | 1.45E-02 | 24.75  | 22.99 | 2.82E-01 | 10.39  | 55.25 | 8.51E-01 | 20.93  | 9.58  | 2.90E-02 | 11.95  | 29.92 | 6.90E-01 |
| cg16206324 | 32.87  | 13.45 | 1.45E-02 | 30.35  | 19.80 | 1.25E-01 | 105.62 | 44.19 | 1.68E-02 | 16.93  | 11.57 | 1.43E-01 | 49.22  | 31.31 | 1.16E-01 |
| cg06767191 | 17.96  | 7.35  | 1.45E-02 | 39.98  | 19.74 | 4.28E-02 | 32.02  | 28.48 | 2.61E-01 | 15.25  | 8.56  | 7.48E-02 | -16.63 | 30.63 | 5.87E-01 |
| cg02051616 | 12.84  | 5.25  | 1.45E-02 | 18.13  | 8.88  | 4.12E-02 | 11.05  | 14.85 | 4.57E-01 | 12.04  | 9.97  | 2.27E-01 | 7.15   | 10.58 | 4.99E-01 |
| cg05483021 | -14.71 | 6.02  | 1.45E-02 | -15.32 | 8.01  | 5.58E-02 | -8.19  | 15.87 | 6.06E-01 | 4.85   | 28.79 | 8.66E-01 | -20.58 | 12.11 | 8.91E-02 |
| cg17755321 | -12.24 | 5.01  | 1.45E-02 | -11.00 | 14.76 | 4.56E-01 | -46.35 | 33.14 | 1.62E-01 | -10.58 | 5.77  | 6.67E-02 | -18.02 | 15.28 | 2.38E-01 |
| cg02084087 | 22.15  | 9.06  | 1.45E-02 | 23.00  | 11.92 | 5.36E-02 | 46.60  | 31.61 | 1.40E-01 | 19.09  | 62.68 | 7.61E-01 | 14.49  | 16.06 | 3.67E-01 |
| cg27272853 | -52.92 | 21.65 | 1.45E-02 | -66.03 | 29.43 | 2.48E-02 | 70.39  | 92.14 | 4.45E-01 | -62.08 | 53.05 | 2.42E-01 | -45.25 | 44.52 | 3.09E-01 |
| cg24803517 | 8.90   | 3.64  | 1.45E-02 | 3.86   | 6.83  | 5.71E-01 | 10.98  | 8.32  | 1.87E-01 | 14.91  | 5.97  | 1.25E-02 | 0.98   | 9.33  | 9.16E-01 |
| cg04202511 | 7.54   | 3.09  | 1.45E-02 | 6.07   | 3.94  | 1.24E-01 | 17.78  | 7.98  | 2.58E-02 | 5.42   | 9.23  | 5.57E-01 | 4.42   | 8.74  | 6.13E-01 |
| cg21044433 | 18.91  | 7.74  | 1.46E-02 | 15.76  | 12.04 | 1.90E-01 | 31.80  | 15.78 | 4.39E-02 | 11.38  | 17.64 | 5.19E-01 | 16.65  | 19.74 | 3.99E-01 |
| cg04554505 | -8.44  | 3.45  | 1.46E-02 | -16.10 | 7.04  | 2.21E-02 | -5.76  | 11.35 | 6.12E-01 | -7.60  | 4.65  | 1.02E-01 | 1.46   | 10.20 | 8.86E-01 |
| cg22628500 | 39.36  | 16.11 | 1.46E-02 | 43.16  | 19.40 | 2.61E-02 | 9.66   | 75.68 | 8.98E-01 | 37.44  | 52.13 | 4.73E-01 | 32.96  | 39.12 | 4.00E-01 |
| cg03208426 | 24.13  | 9.88  | 1.46E-02 | 35.92  | 16.28 | 2.74E-02 | 26.67  | 33.06 | 4.20E-01 | 18.81  | 17.95 | 2.95E-01 | 11.81  | 20.17 | 5.58E-01 |
| cg21088438 | 6.09   | 2.49  | 1.46E-02 | 3.74   | 3.36  | 2.65E-01 | 9.78   | 6.39  | 1.26E-01 | 14.46  | 6.42  | 2.42E-02 | 2.44   | 6.51  | 7.08E-01 |
| cg18207676 | 23.41  | 9.58  | 1.46E-02 | 29.61  | 22.36 | 1.85E-01 | 28.54  | 23.55 | 2.26E-01 | 20.63  | 13.03 | 1.13E-01 | 19.00  | 28.93 | 5.11E-01 |
| cg05954830 | 5.26   | 2.15  | 1.46E-02 | 5.69   | 3.13  | 6.85E-02 | 10.10  | 5.63  | 7.28E-02 | 4.93   | 4.09  | 2.28E-01 | -2.77  | 6.73  | 6.80E-01 |
| cg10342963 | 6.00   | 2.46  | 1.46E-02 | 8.00   | 3.52  | 2.31E-02 | 6.86   | 4.19  | 1.02E-01 | 4.91   | 11.30 | 6.64E-01 | -4.00  | 7.05  | 5.70E-01 |
| cg23390619 | 9.58   | 3.92  | 1.46E-02 | 10.15  | 5.48  | 6.41E-02 | 15.96  | 9.07  | 7.85E-02 | 5.97   | 10.99 | 5.87E-01 | 3.69   | 9.41  | 6.95E-01 |
| cg00415971 | -12.01 | 4.91  | 1.46E-02 | -13.26 | 6.93  | 5.58E-02 | -11.61 | 10.88 | 2.86E-01 | -14.09 | 15.40 | 3.60E-01 | -8.03  | 11.23 | 4.75E-01 |
| cg19990316 | -9.85  | 4.03  | 1.46E-02 | -9.11  | 6.26  | 1.45E-01 | -6.07  | 8.84  | 4.92E-01 | -14.35 | 10.92 | 1.89E-01 | -11.83 | 8.22  | 1.50E-01 |
| cg14927855 | 3.54   | 1.45  | 1.46E-02 | 5.27   | 1.96  | 7.32E-03 | 3.55   | 3.64  | 3.30E-01 | 2.68   | 3.94  | 4.97E-01 | -1.51  | 3.57  | 6.73E-01 |

|            |        |       |          |        |       |          |         |        |          |        |       |          |        |       |          |
|------------|--------|-------|----------|--------|-------|----------|---------|--------|----------|--------|-------|----------|--------|-------|----------|
| cg24942226 | 19.15  | 7.84  | 1.46E-02 | 23.15  | 14.79 | 1.18E-01 | -16.54  | 31.96  | 6.05E-01 | 19.75  | 10.57 | 6.16E-02 | 25.56  | 23.82 | 2.83E-01 |
| cg10374564 | -11.71 | 4.79  | 1.46E-02 | -21.44 | 12.12 | 7.68E-02 | -34.57  | 32.09  | 2.81E-01 | -10.26 | 5.53  | 6.36E-02 | 1.84   | 18.20 | 9.19E-01 |
| cg00502254 | 12.02  | 4.92  | 1.46E-02 | 14.04  | 6.46  | 2.98E-02 | 6.29    | 9.94   | 5.27E-01 | 32.24  | 14.68 | 2.81E-02 | 1.07   | 11.55 | 9.26E-01 |
| cg24850711 | -7.39  | 3.03  | 1.46E-02 | -3.92  | 5.37  | 4.66E-01 | -7.11   | 8.23   | 3.87E-01 | -10.48 | 5.15  | 4.18E-02 | -7.74  | 6.73  | 2.50E-01 |
| cg07080358 | 19.61  | 8.03  | 1.46E-02 | 10.36  | 29.16 | 7.22E-01 | -17.40  | 73.61  | 8.13E-01 | 19.39  | 8.86  | 2.86E-02 | 34.19  | 26.69 | 2.00E-01 |
| cg00151607 | 40.98  | 16.78 | 1.46E-02 | -2.32  | 46.34 | 9.60E-01 | -248.34 | 218.02 | 2.55E-01 | 48.13  | 19.15 | 1.20E-02 | 61.00  | 54.48 | 2.63E-01 |
| cg20326117 | 20.24  | 8.29  | 1.46E-02 | 44.20  | 24.08 | 6.64E-02 | -12.06  | 43.46  | 7.81E-01 | 16.88  | 9.33  | 7.05E-02 | 37.75  | 34.99 | 2.81E-01 |
| cg24137448 | -9.74  | 3.99  | 1.46E-02 | -11.43 | 6.21  | 6.55E-02 | -15.12  | 11.24  | 1.79E-01 | -10.01 | 7.78  | 1.98E-01 | -2.42  | 8.99  | 7.88E-01 |
| cg14275880 | 14.41  | 5.90  | 1.46E-02 | 7.55   | 10.49 | 4.72E-01 | 12.03   | 15.37  | 4.34E-01 | 15.85  | 9.41  | 9.19E-02 | 28.23  | 15.68 | 7.18E-02 |
| cg24359323 | 15.83  | 6.48  | 1.46E-02 | -10.49 | 30.09 | 7.27E-01 | 67.31   | 76.70  | 3.80E-01 | 18.77  | 6.91  | 6.60E-03 | -10.14 | 25.04 | 6.85E-01 |
| cg12727398 | 14.20  | 5.82  | 1.46E-02 | 19.20  | 8.35  | 2.15E-02 | -2.92   | 14.38  | 8.39E-01 | 22.69  | 26.63 | 3.94E-01 | 14.10  | 10.55 | 1.82E-01 |
| cg00308914 | 14.15  | 5.79  | 1.46E-02 | 17.37  | 7.49  | 2.04E-02 | 14.60   | 15.89  | 3.58E-01 | 8.57   | 20.53 | 6.76E-01 | 5.99   | 13.32 | 6.53E-01 |
| cg10426076 | 5.74   | 2.35  | 1.46E-02 | 5.00   | 3.43  | 1.45E-01 | 7.33    | 5.75   | 2.02E-01 | 8.35   | 4.86  | 8.58E-02 | 1.64   | 6.55  | 8.03E-01 |
| cg11114873 | 28.65  | 11.73 | 1.46E-02 | 38.36  | 25.55 | 1.33E-01 | -15.20  | 45.51  | 7.38E-01 | 27.56  | 15.95 | 8.39E-02 | 36.68  | 27.58 | 1.84E-01 |
| cg17314700 | 8.86   | 3.63  | 1.46E-02 | 10.27  | 4.93  | 3.72E-02 | -1.25   | 8.32   | 8.80E-01 | 11.57  | 13.57 | 3.94E-01 | 13.79  | 8.20  | 9.25E-02 |
| cg16830966 | 70.45  | 28.86 | 1.46E-02 | 0.13   | 66.30 | 9.98E-01 | -269.77 | 281.36 | 3.38E-01 | 94.77  | 31.53 | 2.65E-03 | 70.21  | 73.99 | 3.43E-01 |
| cg15736994 | 9.60   | 3.93  | 1.46E-02 | 7.72   | 6.02  | 2.00E-01 | 11.63   | 7.70   | 1.31E-01 | 14.36  | 11.56 | 2.14E-01 | 8.22   | 8.89  | 3.55E-01 |
| cg06943667 | 32.46  | 13.30 | 1.46E-02 | 30.21  | 16.59 | 6.87E-02 | 30.25   | 50.53  | 5.49E-01 | 74.24  | 42.42 | 8.01E-02 | 19.28  | 30.48 | 5.27E-01 |
| cg08408453 | 9.83   | 4.03  | 1.47E-02 | 8.15   | 5.77  | 1.58E-01 | 4.01    | 8.99   | 6.56E-01 | 2.79   | 19.44 | 8.86E-01 | 18.34  | 7.76  | 1.81E-02 |
| cg11767757 | -8.18  | 3.35  | 1.47E-02 | -10.98 | 4.48  | 1.43E-02 | -4.03   | 8.69   | 6.43E-01 | -10.82 | 9.59  | 2.59E-01 | -0.67  | 8.14  | 9.34E-01 |
| cg13601496 | 29.55  | 12.11 | 1.47E-02 | 28.29  | 19.37 | 1.44E-01 | 6.82    | 33.83  | 8.40E-01 | 63.44  | 28.37 | 2.53E-02 | 20.27  | 22.14 | 3.60E-01 |
| cg08026618 | 34.37  | 14.08 | 1.47E-02 | 55.43  | 22.08 | 1.21E-02 | 43.56   | 48.48  | 3.69E-01 | 43.22  | 39.75 | 2.77E-01 | 7.11   | 22.74 | 7.54E-01 |
| cg22902505 | 7.00   | 2.87  | 1.47E-02 | 6.70   | 4.05  | 9.86E-02 | 2.84    | 6.56   | 6.65E-01 | 14.35  | 7.49  | 5.52E-02 | 6.17   | 7.13  | 3.86E-01 |
| cg15393051 | -41.07 | 16.83 | 1.47E-02 | -30.83 | 20.52 | 1.33E-01 | -105.15 | 51.35  | 4.06E-02 | -32.43 | 88.19 | 7.13E-01 | -42.82 | 39.30 | 2.76E-01 |
| cg15434398 | -13.73 | 5.62  | 1.47E-02 | 0.39   | 13.36 | 9.77E-01 | -14.48  | 23.37  | 5.36E-01 | -17.43 | 6.93  | 1.19E-02 | -13.92 | 17.28 | 4.20E-01 |
| cg26036479 | -39.83 | 16.32 | 1.47E-02 | -28.27 | 50.41 | 5.75E-01 | -155.20 | 185.24 | 4.02E-01 | -39.93 | 18.45 | 3.04E-02 | -42.07 | 50.40 | 4.04E-01 |
| cg06914817 | 17.40  | 7.13  | 1.47E-02 | 36.80  | 13.92 | 8.18E-03 | 9.25    | 16.61  | 5.78E-01 | 11.77  | 10.53 | 2.64E-01 | 6.71   | 23.22 | 7.73E-01 |
| cg12687125 | 12.20  | 5.00  | 1.47E-02 | 8.18   | 11.21 | 4.65E-01 | -1.26   | 20.85  | 9.52E-01 | 12.34  | 6.27  | 4.89E-02 | 26.12  | 15.30 | 8.78E-02 |
| cg11857033 | 23.52  | 9.64  | 1.47E-02 | 32.42  | 11.29 | 4.08E-03 | 43.26   | 25.99  | 9.60E-02 | 29.01  | 19.86 | 1.44E-01 | -2.13  | 15.45 | 8.91E-01 |
| cg10053879 | 20.68  | 8.47  | 1.47E-02 | 24.73  | 13.22 | 6.13E-02 | 23.59   | 16.57  | 1.54E-01 | 25.69  | 19.12 | 1.79E-01 | -5.42  | 23.43 | 8.17E-01 |
| cg24399830 | 20.01  | 8.20  | 1.47E-02 | 15.23  | 10.59 | 1.51E-01 | 65.38   | 28.99  | 2.41E-02 | 28.15  | 40.71 | 4.89E-01 | 16.10  | 15.50 | 2.99E-01 |
| cg23495748 | 15.83  | 6.49  | 1.47E-02 | 39.32  | 17.72 | 2.65E-02 | 22.06   | 28.22  | 4.34E-01 | 10.35  | 8.03  | 1.98E-01 | 16.44  | 16.17 | 3.10E-01 |
| cg16537196 | -34.49 | 14.13 | 1.47E-02 | -33.03 | 17.43 | 5.81E-02 | -2.78   | 67.78  | 9.67E-01 | -48.52 | 42.91 | 2.58E-01 | -38.76 | 32.36 | 2.31E-01 |
| cg00210271 | 13.17  | 5.40  | 1.47E-02 | 9.25   | 14.14 | 5.13E-01 | 42.19   | 38.07  | 2.68E-01 | 13.51  | 6.92  | 5.08E-02 | 12.20  | 11.36 | 2.83E-01 |
| cg11747820 | -12.97 | 5.32  | 1.47E-02 | -22.84 | 11.66 | 5.02E-02 | -33.75  | 27.66  | 2.22E-01 | -9.37  | 6.50  | 1.49E-01 | -8.26  | 18.19 | 6.50E-01 |

|            |        |       |          |        |       |          |        |        |          |        |       |          |        |       |          |
|------------|--------|-------|----------|--------|-------|----------|--------|--------|----------|--------|-------|----------|--------|-------|----------|
| cg18555433 | -13.64 | 5.59  | 1.47E-02 | -20.72 | 7.89  | 8.60E-03 | -5.05  | 13.27  | 7.03E-01 | -7.02  | 15.30 | 6.46E-01 | -7.46  | 12.94 | 5.64E-01 |
| cg16284168 | -34.36 | 14.09 | 1.47E-02 | -42.51 | 17.56 | 1.55E-02 | -16.15 | 69.33  | 8.16E-01 | -22.66 | 73.58 | 7.58E-01 | -19.79 | 26.67 | 4.58E-01 |
| cg07906855 | 11.14  | 4.57  | 1.47E-02 | 4.90   | 6.92  | 4.79E-01 | 20.04  | 8.74   | 2.18E-02 | 21.75  | 11.17 | 5.15E-02 | 4.24   | 9.24  | 6.46E-01 |
| cg09506081 | 4.61   | 1.89  | 1.47E-02 | 4.14   | 2.61  | 1.13E-01 | 2.52   | 4.61   | 5.85E-01 | 10.75  | 5.62  | 5.55E-02 | 4.11   | 4.29  | 3.38E-01 |
| cg27440715 | 31.39  | 12.87 | 1.47E-02 | 51.12  | 16.67 | 2.16E-03 | -6.33  | 29.14  | 8.28E-01 | 44.02  | 35.48 | 2.15E-01 | 18.33  | 22.54 | 4.16E-01 |
| cg06738602 | 13.90  | 5.70  | 1.47E-02 | 19.53  | 8.59  | 2.29E-02 | 21.92  | 14.87  | 1.40E-01 | -0.24  | 17.16 | 9.89E-01 | 6.96   | 10.35 | 5.01E-01 |
| cg21163717 | -9.00  | 3.69  | 1.47E-02 | -13.24 | 4.82  | 6.00E-03 | -6.48  | 8.50   | 4.45E-01 | -0.12  | 10.27 | 9.91E-01 | 0.03   | 11.94 | 9.98E-01 |
| cg05476182 | 19.67  | 8.06  | 1.47E-02 | 10.92  | 13.83 | 4.30E-01 | 35.24  | 14.63  | 1.60E-02 | 21.99  | 18.28 | 2.29E-01 | 5.99   | 20.08 | 7.65E-01 |
| cg17191178 | 31.81  | 13.04 | 1.47E-02 | 30.84  | 16.44 | 6.07E-02 | 63.70  | 52.20  | 2.22E-01 | 28.17  | 70.24 | 6.88E-01 | 27.23  | 24.93 | 2.75E-01 |
| cg05180985 | 30.39  | 12.46 | 1.47E-02 | 45.86  | 20.32 | 2.40E-02 | 34.31  | 33.15  | 3.01E-01 | 10.11  | 32.65 | 7.57E-01 | 20.25  | 21.47 | 3.46E-01 |
| cg08855671 | 23.48  | 9.63  | 1.47E-02 | 26.62  | 17.13 | 1.20E-01 | 23.40  | 18.99  | 2.18E-01 | 13.81  | 17.71 | 4.36E-01 | 37.82  | 26.53 | 1.54E-01 |
| cg08058544 | 17.21  | 7.05  | 1.47E-02 | 25.07  | 31.15 | 4.21E-01 | 50.14  | 97.64  | 6.08E-01 | 16.23  | 7.49  | 3.02E-02 | 22.24  | 29.57 | 4.52E-01 |
| cg12556960 | 30.70  | 12.59 | 1.47E-02 | 72.31  | 27.60 | 8.80E-03 | 12.32  | 85.95  | 8.86E-01 | 24.75  | 11.80 | 3.60E-02 | -4.04  | 40.33 | 9.20E-01 |
| cg26572165 | -32.18 | 13.20 | 1.47E-02 | -35.11 | 19.00 | 6.46E-02 | -69.67 | 36.14  | 5.39E-02 | 11.90  | 37.39 | 7.50E-01 | -28.64 | 25.89 | 2.69E-01 |
| cg09818588 | 11.65  | 4.78  | 1.47E-02 | 11.22  | 7.84  | 1.53E-01 | 1.93   | 11.20  | 8.63E-01 | 11.43  | 9.16  | 2.12E-01 | 23.10  | 11.44 | 4.35E-02 |
| cg07640645 | 19.30  | 7.91  | 1.47E-02 | 37.67  | 19.68 | 5.56E-02 | -18.71 | 97.76  | 8.48E-01 | 15.06  | 9.01  | 9.47E-02 | 28.25  | 32.10 | 3.79E-01 |
| cg04861263 | -23.57 | 9.67  | 1.47E-02 | -29.25 | 24.55 | 2.34E-01 | -45.65 | 107.51 | 6.71E-01 | -22.50 | 11.19 | 4.44E-02 | -20.70 | 31.99 | 5.18E-01 |
| cg13883851 | 11.94  | 4.90  | 1.47E-02 | 14.05  | 6.70  | 3.60E-02 | 5.88   | 11.25  | 6.01E-01 | 6.87   | 17.74 | 6.99E-01 | 13.94  | 10.92 | 2.01E-01 |
| cg10790791 | 20.01  | 8.21  | 1.47E-02 | 29.92  | 10.76 | 5.42E-03 | 14.29  | 25.06  | 5.68E-01 | 14.02  | 25.44 | 5.82E-01 | -1.84  | 18.02 | 9.19E-01 |
| cg08179353 | -8.59  | 3.52  | 1.47E-02 | -10.12 | 5.82  | 8.22E-02 | -10.50 | 10.01  | 2.94E-01 | -7.97  | 5.83  | 1.71E-01 | -4.65  | 9.26  | 6.16E-01 |
| cg10935723 | -5.86  | 2.40  | 1.48E-02 | -6.93  | 4.34  | 1.10E-01 | -5.14  | 5.68   | 3.65E-01 | -2.78  | 3.81  | 4.65E-01 | -14.77 | 7.08  | 3.69E-02 |
| cg05699739 | 6.87   | 2.82  | 1.48E-02 | 5.22   | 3.97  | 1.89E-01 | 8.32   | 8.83   | 3.46E-01 | 12.69  | 5.74  | 2.69E-02 | 2.16   | 7.23  | 7.65E-01 |
| cg14769021 | -14.58 | 5.98  | 1.48E-02 | -20.80 | 8.89  | 1.94E-02 | 9.57   | 15.33  | 5.33E-01 | -22.09 | 12.87 | 8.61E-02 | -13.12 | 10.72 | 2.21E-01 |
| cg19863595 | -7.88  | 3.23  | 1.48E-02 | -7.20  | 4.36  | 9.89E-02 | -9.74  | 6.75   | 1.49E-01 | 0.22   | 10.75 | 9.84E-01 | -12.98 | 8.89  | 1.44E-01 |
| cg13283635 | 8.55   | 3.51  | 1.48E-02 | 5.80   | 4.51  | 1.99E-01 | 8.14   | 7.98   | 3.08E-01 | 15.39  | 13.08 | 2.39E-01 | 18.07  | 9.68  | 6.19E-02 |
| cg20234007 | 11.77  | 4.83  | 1.48E-02 | 7.85   | 7.22  | 2.77E-01 | 14.48  | 10.95  | 1.86E-01 | 16.71  | 12.11 | 1.68E-01 | 13.98  | 10.81 | 1.96E-01 |
| cg03627957 | -28.04 | 11.50 | 1.48E-02 | -42.95 | 16.76 | 1.04E-02 | -40.12 | 46.31  | 3.86E-01 | 9.86   | 30.88 | 7.49E-01 | -20.41 | 20.06 | 3.09E-01 |
| cg13971140 | -32.77 | 13.44 | 1.48E-02 | -37.78 | 17.10 | 2.72E-02 | -29.79 | 59.91  | 6.19E-01 | -49.70 | 41.13 | 2.27E-01 | -11.67 | 28.33 | 6.80E-01 |
| cg11617821 | -8.86  | 3.64  | 1.48E-02 | -14.41 | 7.39  | 5.11E-02 | -5.15  | 11.53  | 6.55E-01 | -7.07  | 5.05  | 1.62E-01 | -8.54  | 9.70  | 3.79E-01 |
| cg08736883 | -7.93  | 3.25  | 1.48E-02 | -5.54  | 5.26  | 2.93E-01 | -6.96  | 6.64   | 2.95E-01 | -6.74  | 7.34  | 3.58E-01 | -15.55 | 7.64  | 4.18E-02 |
| cg16102240 | -8.87  | 3.64  | 1.48E-02 | -7.55  | 4.87  | 1.21E-01 | -9.03  | 9.11   | 3.22E-01 | 1.71   | 13.19 | 8.97E-01 | -16.30 | 8.04  | 4.26E-02 |
| cg26090062 | -5.37  | 2.20  | 1.48E-02 | -5.98  | 3.19  | 6.07E-02 | -8.84  | 4.99   | 7.63E-02 | -9.56  | 6.84  | 1.62E-01 | 0.91   | 4.67  | 8.45E-01 |
| cg23779604 | -3.87  | 1.59  | 1.48E-02 | -4.24  | 1.96  | 3.06E-02 | -1.92  | 2.94   | 5.13E-01 | 2.77   | 5.79  | 6.32E-01 | -8.44  | 3.64  | 2.06E-02 |
| cg18175779 | -19.46 | 7.98  | 1.48E-02 | -19.74 | 13.21 | 1.35E-01 | -15.09 | 21.11  | 4.75E-01 | -16.61 | 13.98 | 2.35E-01 | -28.18 | 19.59 | 1.50E-01 |
| cg22587600 | 5.83   | 2.39  | 1.48E-02 | 5.47   | 3.89  | 1.59E-01 | 6.54   | 5.13   | 2.03E-01 | 4.98   | 4.73  | 2.93E-01 | 7.16   | 6.20  | 2.48E-01 |

|            |        |       |          |        |       |          |        |        |          |         |       |          |        |       |          |
|------------|--------|-------|----------|--------|-------|----------|--------|--------|----------|---------|-------|----------|--------|-------|----------|
| cg22875527 | -16.22 | 6.65  | 1.48E-02 | -24.56 | 13.44 | 6.77E-02 | -6.04  | 14.93  | 6.86E-01 | -16.00  | 10.17 | 1.16E-01 | -16.79 | 18.60 | 3.67E-01 |
| cg21188154 | 25.31  | 10.39 | 1.48E-02 | 19.20  | 14.10 | 1.73E-01 | 28.11  | 29.07  | 3.34E-01 | 79.40   | 33.49 | 1.77E-02 | 15.77  | 21.36 | 4.60E-01 |
| cg17680611 | -8.60  | 3.53  | 1.48E-02 | -7.94  | 4.98  | 1.11E-01 | -12.04 | 7.96   | 1.30E-01 | -8.09   | 9.57  | 3.98E-01 | -6.96  | 8.68  | 4.23E-01 |
| cg15422147 | -18.77 | 7.70  | 1.48E-02 | -11.95 | 15.05 | 4.27E-01 | -29.32 | 17.08  | 8.60E-02 | -23.14  | 13.44 | 8.51E-02 | -10.08 | 16.92 | 5.51E-01 |
| cg08594589 | 17.26  | 7.08  | 1.48E-02 | 24.02  | 10.82 | 2.64E-02 | 13.34  | 13.25  | 3.14E-01 | 16.28   | 19.45 | 4.03E-01 | 6.48   | 18.12 | 7.21E-01 |
| cg16877339 | -21.81 | 8.95  | 1.48E-02 | -12.20 | 13.27 | 3.58E-01 | -31.65 | 23.15  | 1.71E-01 | -28.21  | 27.66 | 3.08E-01 | -29.51 | 16.60 | 7.56E-02 |
| cg00192468 | -22.32 | 9.16  | 1.48E-02 | -25.17 | 19.55 | 1.98E-01 | -32.58 | 39.73  | 4.12E-01 | -18.55  | 11.63 | 1.11E-01 | -33.18 | 27.94 | 2.35E-01 |
| cg02886806 | -14.45 | 5.93  | 1.48E-02 | -17.36 | 13.85 | 2.10E-01 | -4.29  | 22.74  | 8.50E-01 | -17.48  | 7.38  | 1.78E-02 | 3.04   | 18.47 | 8.69E-01 |
| cg22176895 | 20.59  | 8.45  | 1.48E-02 | 25.49  | 13.24 | 5.41E-02 | 15.20  | 23.26  | 5.13E-01 | 15.99   | 23.77 | 5.01E-01 | 18.48  | 14.62 | 2.06E-01 |
| cg01768328 | 20.20  | 8.29  | 1.48E-02 | 27.67  | 20.09 | 1.68E-01 | 12.55  | 21.83  | 5.65E-01 | 17.50   | 10.64 | 9.99E-02 | 38.85  | 29.58 | 1.89E-01 |
| cg09590852 | 15.49  | 6.36  | 1.48E-02 | 15.71  | 9.15  | 8.60E-02 | 25.22  | 10.95  | 2.12E-02 | 5.49    | 30.34 | 8.56E-01 | -6.17  | 17.22 | 7.20E-01 |
| cg13574150 | -11.74 | 4.82  | 1.48E-02 | -7.73  | 11.49 | 5.01E-01 | 9.57   | 19.47  | 6.23E-01 | -13.59  | 5.88  | 2.09E-02 | -20.15 | 15.94 | 2.06E-01 |
| cg22896991 | 16.53  | 6.79  | 1.48E-02 | 33.01  | 16.34 | 4.34E-02 | 94.75  | 82.03  | 2.48E-01 | 12.74   | 7.80  | 1.02E-01 | 8.61   | 26.71 | 7.47E-01 |
| cg25492364 | 23.64  | 9.70  | 1.48E-02 | 19.51  | 14.20 | 1.70E-01 | 51.26  | 22.34  | 2.18E-02 | 9.93    | 30.73 | 7.47E-01 | 15.81  | 19.60 | 4.20E-01 |
| cg01648999 | 24.89  | 10.22 | 1.48E-02 | 18.14  | 9.53  | 5.68E-02 | 59.20  | 17.36  | 6.49E-04 | 27.79   | 21.42 | 1.95E-01 | 7.53   | 12.01 | 5.31E-01 |
| cg27257926 | 15.96  | 6.55  | 1.48E-02 | 25.82  | 11.99 | 3.13E-02 | 3.65   | 17.04  | 8.30E-01 | 9.55    | 9.91  | 3.35E-01 | 30.31  | 19.18 | 1.14E-01 |
| cg15808604 | 12.91  | 5.30  | 1.49E-02 | 22.32  | 11.18 | 4.58E-02 | 3.92   | 23.57  | 8.68E-01 | 9.24    | 6.59  | 1.61E-01 | 22.02  | 18.97 | 2.46E-01 |
| cg07693569 | -61.95 | 25.43 | 1.49E-02 | -42.59 | 37.17 | 2.52E-01 | 46.30  | 111.27 | 6.77E-01 | -111.43 | 49.97 | 2.58E-02 | -70.59 | 54.16 | 1.92E-01 |
| cg15357118 | 13.16  | 5.40  | 1.49E-02 | 16.76  | 8.34  | 4.45E-02 | 17.14  | 12.60  | 1.74E-01 | 20.91   | 13.08 | 1.10E-01 | -2.65  | 11.39 | 8.16E-01 |
| cg00908117 | -17.82 | 7.32  | 1.49E-02 | -43.83 | 20.47 | 3.23E-02 | 4.85   | 41.76  | 9.08E-01 | -15.91  | 8.36  | 5.69E-02 | -2.33  | 26.76 | 9.31E-01 |
| cg00958955 | 28.16  | 11.56 | 1.49E-02 | 12.05  | 21.98 | 5.84E-01 | 22.43  | 46.72  | 6.31E-01 | 43.76   | 16.20 | 6.92E-03 | 7.67   | 29.57 | 7.95E-01 |
| cg05620095 | 16.09  | 6.60  | 1.49E-02 | 14.42  | 14.44 | 3.18E-01 | -2.55  | 19.49  | 8.96E-01 | 18.80   | 8.80  | 3.27E-02 | 24.59  | 19.66 | 2.11E-01 |
| cg15065877 | -8.81  | 3.62  | 1.49E-02 | -13.22 | 9.30  | 1.55E-01 | 7.94   | 16.80  | 6.36E-01 | -9.75   | 4.35  | 2.49E-02 | -3.92  | 10.85 | 7.18E-01 |
| cg17405031 | 8.55   | 3.51  | 1.49E-02 | 7.36   | 7.36  | 3.18E-01 | 17.61  | 12.92  | 1.73E-01 | 11.22   | 4.72  | 1.75E-02 | -4.33  | 9.21  | 6.38E-01 |
| cg02565196 | 14.25  | 5.85  | 1.49E-02 | 11.84  | 8.50  | 1.64E-01 | 11.74  | 12.23  | 3.37E-01 | 27.17   | 13.54 | 4.48E-02 | 7.98   | 17.54 | 6.49E-01 |
| cg09577317 | -11.72 | 4.81  | 1.49E-02 | -8.17  | 13.03 | 5.31E-01 | -6.90  | 18.86  | 7.14E-01 | -11.75  | 5.67  | 3.83E-02 | -21.71 | 17.22 | 2.08E-01 |
| cg27524460 | -21.27 | 8.74  | 1.49E-02 | -14.46 | 12.37 | 2.42E-01 | -20.89 | 21.01  | 3.20E-01 | -8.72   | 14.78 | 5.55E-01 | -49.86 | 17.50 | 4.38E-03 |
| cg17895511 | 15.03  | 6.17  | 1.49E-02 | 17.94  | 15.79 | 2.56E-01 | 48.47  | 26.83  | 7.08E-02 | 14.24   | 7.25  | 4.94E-02 | -8.69  | 23.42 | 7.11E-01 |
| cg03718677 | -27.81 | 11.42 | 1.49E-02 | -31.25 | 24.54 | 2.03E-01 | -60.18 | 45.15  | 1.83E-01 | -28.70  | 14.56 | 4.88E-02 | 4.42   | 35.33 | 9.00E-01 |
| cg04663057 | 13.38  | 5.50  | 1.49E-02 | 8.68   | 8.94  | 3.32E-01 | 27.01  | 14.59  | 6.41E-02 | 21.92   | 9.90  | 2.67E-02 | 0.30   | 11.85 | 9.80E-01 |
| cg03963919 | -7.76  | 3.19  | 1.49E-02 | -12.18 | 5.39  | 2.40E-02 | 1.89   | 8.94   | 8.32E-01 | -6.22   | 4.96  | 2.11E-01 | -10.68 | 9.56  | 2.64E-01 |
| cg16341159 | 17.95  | 7.37  | 1.49E-02 | 22.67  | 10.16 | 2.57E-02 | 10.57  | 21.98  | 6.31E-01 | -5.17   | 27.70 | 8.52E-01 | 17.89  | 13.68 | 1.91E-01 |
| cg24874350 | 14.85  | 6.10  | 1.49E-02 | 19.73  | 9.54  | 3.87E-02 | 17.79  | 15.22  | 2.43E-01 | 10.69   | 17.33 | 5.37E-01 | 8.49   | 11.01 | 4.40E-01 |
| cg12130328 | 25.72  | 10.56 | 1.49E-02 | 41.25  | 15.63 | 8.30E-03 | -3.87  | 32.42  | 9.05E-01 | 15.12   | 31.24 | 6.28E-01 | 17.21  | 18.59 | 3.55E-01 |
| cg17164016 | -7.80  | 3.20  | 1.49E-02 | -9.25  | 6.57  | 1.59E-01 | 7.33   | 13.74  | 5.94E-01 | -8.89   | 4.19  | 3.39E-02 | -6.52  | 9.13  | 4.75E-01 |

|            |        |       |          |        |       |          |         |        |          |        |       |          |        |       |          |
|------------|--------|-------|----------|--------|-------|----------|---------|--------|----------|--------|-------|----------|--------|-------|----------|
| cg22533317 | 10.46  | 4.30  | 1.49E-02 | 8.86   | 5.78  | 1.25E-01 | 11.46   | 9.80   | 2.42E-01 | 3.05   | 16.40 | 8.53E-01 | 16.92  | 9.96  | 8.94E-02 |
| cg03595538 | 39.49  | 16.22 | 1.49E-02 | 32.41  | 44.02 | 4.62E-01 | 71.68   | 143.91 | 6.18E-01 | 47.85  | 18.76 | 1.08E-02 | -15.35 | 50.32 | 7.60E-01 |
| cg03895857 | 7.34   | 3.01  | 1.49E-02 | 8.22   | 4.99  | 9.96E-02 | 6.76    | 5.79   | 2.43E-01 | 6.60   | 6.75  | 3.29E-01 | 7.24   | 7.44  | 3.30E-01 |
| cg15202134 | 35.41  | 14.55 | 1.49E-02 | 60.84  | 18.15 | 8.01E-04 | 75.60   | 34.07  | 2.65E-02 | 19.97  | 9.49  | 3.53E-02 | 5.08   | 24.45 | 8.36E-01 |
| cg12705352 | 28.10  | 11.54 | 1.49E-02 | 32.09  | 14.48 | 2.67E-02 | -40.76  | 102.21 | 6.90E-01 | -2.30  | 41.04 | 9.55E-01 | 30.85  | 22.13 | 1.63E-01 |
| cg26014373 | 14.62  | 6.01  | 1.49E-02 | 16.18  | 17.87 | 3.65E-01 | 34.06   | 33.95  | 3.16E-01 | 13.56  | 6.73  | 4.38E-02 | 15.71  | 25.00 | 5.30E-01 |
| cg07145683 | 39.87  | 16.38 | 1.49E-02 | 30.61  | 16.44 | 6.26E-02 | 107.34  | 39.65  | 6.78E-03 | 2.82   | 38.70 | 9.42E-01 | 40.77  | 28.78 | 1.57E-01 |
| cg16152136 | -12.87 | 5.29  | 1.49E-02 | -10.57 | 12.04 | 3.80E-01 | -20.73  | 25.29  | 4.12E-01 | -14.72 | 6.52  | 2.39E-02 | -2.22  | 16.29 | 8.91E-01 |
| cg16168509 | -10.53 | 4.33  | 1.50E-02 | -13.97 | 9.75  | 1.52E-01 | 14.43   | 20.72  | 4.86E-01 | -9.46  | 5.32  | 7.55E-02 | -21.88 | 13.78 | 1.12E-01 |
| cg08965655 | -14.59 | 6.00  | 1.50E-02 | -17.30 | 9.33  | 6.38E-02 | -11.93  | 13.55  | 3.79E-01 | -5.83  | 18.34 | 7.50E-01 | -15.78 | 11.24 | 1.60E-01 |
| cg21871883 | 15.54  | 6.39  | 1.50E-02 | 15.20  | 7.47  | 4.18E-02 | 28.70   | 24.93  | 2.50E-01 | 26.77  | 31.82 | 4.00E-01 | 8.99   | 15.84 | 5.70E-01 |
| cg18513123 | -42.10 | 17.30 | 1.50E-02 | 29.59  | 52.90 | 5.76E-01 | -112.71 | 240.64 | 6.40E-01 | -53.40 | 19.64 | 6.54E-03 | -28.96 | 51.82 | 5.76E-01 |
| cg16067628 | 12.16  | 5.00  | 1.50E-02 | 9.62   | 7.17  | 1.80E-01 | 23.45   | 10.41  | 2.42E-02 | -4.46  | 15.78 | 7.77E-01 | 13.77  | 11.65 | 2.37E-01 |
| cg22012156 | -13.57 | 5.58  | 1.50E-02 | -19.48 | 11.54 | 9.12E-02 | -8.55   | 15.16  | 5.73E-01 | -13.36 | 8.21  | 1.04E-01 | -10.00 | 13.54 | 4.60E-01 |
| cg25657752 | 24.75  | 10.17 | 1.50E-02 | 46.29  | 21.66 | 3.26E-02 | 15.79   | 25.05  | 5.29E-01 | 21.54  | 14.95 | 1.50E-01 | 12.93  | 26.15 | 6.21E-01 |
| cg11672390 | 16.63  | 6.84  | 1.50E-02 | 21.44  | 14.19 | 1.31E-01 | 24.69   | 15.51  | 1.11E-01 | 11.57  | 9.88  | 2.42E-01 | 13.91  | 22.18 | 5.30E-01 |
| cg25547580 | 15.16  | 6.23  | 1.50E-02 | 37.18  | 11.96 | 1.87E-03 | 14.62   | 14.00  | 2.96E-01 | 10.55  | 6.65  | 1.12E-01 | 6.11   | 9.39  | 5.16E-01 |
| cg24701309 | 22.12  | 9.09  | 1.50E-02 | 28.46  | 17.84 | 1.11E-01 | 13.64   | 18.96  | 4.72E-01 | 19.02  | 15.00 | 2.05E-01 | 32.21  | 24.05 | 1.81E-01 |
| cg27576485 | 6.22   | 2.55  | 1.50E-02 | 5.58   | 3.97  | 1.60E-01 | 7.68    | 4.20   | 6.77E-02 | 4.79   | 9.67  | 6.21E-01 | 5.00   | 6.66  | 4.52E-01 |
| cg25663741 | 27.28  | 11.21 | 1.50E-02 | 5.99   | 17.19 | 7.28E-01 | 27.53   | 48.42  | 5.70E-01 | 31.95  | 13.63 | 1.91E-02 | 69.38  | 31.45 | 2.74E-02 |
| cg13874040 | 26.36  | 10.84 | 1.50E-02 | 54.86  | 21.57 | 1.10E-02 | 32.74   | 31.01  | 2.91E-01 | 12.44  | 9.53  | 1.92E-01 | 39.67  | 30.30 | 1.90E-01 |
| cg16178907 | -9.43  | 3.88  | 1.50E-02 | -20.23 | 11.04 | 6.68E-02 | -32.57  | 20.44  | 1.11E-01 | -7.45  | 4.52  | 9.91E-02 | -2.64  | 12.03 | 8.26E-01 |
| cg24926042 | -15.22 | 6.26  | 1.50E-02 | -21.65 | 9.52  | 2.29E-02 | -26.64  | 14.68  | 6.97E-02 | 3.05   | 18.15 | 8.66E-01 | -5.20  | 12.09 | 6.67E-01 |
| cg06696028 | 26.78  | 11.01 | 1.50E-02 | 42.92  | 23.28 | 6.52E-02 | 31.84   | 27.85  | 2.53E-01 | 12.81  | 8.67  | 1.40E-01 | 63.28  | 29.47 | 3.18E-02 |
| cg25520040 | 15.36  | 6.32  | 1.50E-02 | 18.66  | 11.69 | 1.10E-01 | 6.24    | 19.15  | 7.45E-01 | 16.18  | 9.52  | 8.93E-02 | 13.30  | 15.83 | 4.01E-01 |
| cg03457984 | 17.44  | 7.17  | 1.50E-02 | -0.79  | 18.45 | 9.66E-01 | 20.82   | 24.48  | 3.95E-01 | 22.22  | 8.67  | 1.04E-02 | 7.28   | 25.41 | 7.75E-01 |
| cg19981409 | -7.20  | 2.96  | 1.50E-02 | -8.68  | 4.19  | 3.81E-02 | -6.79   | 7.60   | 3.72E-01 | -2.54  | 7.09  | 7.20E-01 | -7.94  | 7.07  | 2.62E-01 |
| cg24047665 | 11.99  | 4.93  | 1.50E-02 | 6.61   | 7.06  | 3.49E-01 | 18.23   | 9.44   | 5.36E-02 | 15.33  | 15.42 | 3.20E-01 | 16.15  | 13.25 | 2.23E-01 |
| cg09508448 | 21.49  | 8.84  | 1.50E-02 | 17.35  | 16.19 | 2.84E-01 | 30.27   | 16.95  | 7.42E-02 | 18.04  | 16.01 | 2.60E-01 | 20.66  | 24.86 | 4.06E-01 |
| cg17250812 | -13.46 | 5.53  | 1.50E-02 | -7.60  | 11.55 | 5.11E-01 | -16.63  | 19.24  | 3.88E-01 | -18.42 | 7.25  | 1.11E-02 | 3.76   | 17.08 | 8.26E-01 |
| cg03575041 | 14.29  | 5.88  | 1.50E-02 | 22.57  | 9.35  | 1.57E-02 | 6.99    | 11.88  | 5.56E-01 | 8.19   | 13.44 | 5.42E-01 | 12.39  | 14.30 | 3.86E-01 |
| cg01818648 | 32.72  | 13.45 | 1.50E-02 | 16.85  | 48.11 | 7.26E-01 | 62.43   | 190.67 | 7.43E-01 | 36.13  | 14.52 | 1.28E-02 | 1.50   | 55.41 | 9.78E-01 |
| cg12173558 | 18.67  | 7.68  | 1.50E-02 | 15.20  | 11.07 | 1.70E-01 | 18.57   | 22.90  | 4.17E-01 | 22.75  | 16.04 | 1.56E-01 | 22.89  | 18.21 | 2.09E-01 |
| cg25881344 | 33.39  | 13.73 | 1.50E-02 | 28.46  | 21.13 | 1.78E-01 | -25.39  | 66.27  | 7.02E-01 | 35.76  | 20.38 | 7.93E-02 | 77.02  | 48.27 | 1.11E-01 |
| cg06458469 | -33.17 | 13.64 | 1.50E-02 | -39.07 | 36.45 | 2.84E-01 | -70.77  | 72.02  | 3.26E-01 | -36.01 | 15.89 | 2.35E-02 | 15.58  | 46.11 | 7.35E-01 |



|            |        |       |          |        |       |          |         |        |          |        |       |          |        |       |          |
|------------|--------|-------|----------|--------|-------|----------|---------|--------|----------|--------|-------|----------|--------|-------|----------|
| cg03857664 | -11.40 | 4.69  | 1.50E-02 | -18.38 | 8.82  | 3.72E-02 | -9.89   | 12.03  | 4.11E-01 | -5.00  | 7.79  | 5.21E-01 | -14.20 | 10.37 | 1.71E-01 |
| cg15260951 | -15.19 | 6.25  | 1.50E-02 | -15.91 | 9.33  | 8.83E-02 | -11.97  | 23.16  | 6.05E-01 | -35.13 | 14.75 | 1.72E-02 | -2.98  | 11.41 | 7.94E-01 |
| cg19478558 | -37.94 | 15.60 | 1.50E-02 | -31.84 | 22.60 | 1.59E-01 | -7.71   | 45.30  | 8.65E-01 | -27.42 | 31.42 | 3.83E-01 | -95.29 | 39.21 | 1.51E-02 |
| cg00581103 | 25.04  | 10.30 | 1.50E-02 | 21.82  | 16.27 | 1.80E-01 | 3.95    | 21.60  | 8.55E-01 | 24.89  | 23.83 | 2.96E-01 | 57.88  | 23.88 | 1.54E-02 |
| cg27049886 | 50.19  | 20.64 | 1.50E-02 | 58.14  | 24.55 | 1.79E-02 | -105.39 | 118.45 | 3.74E-01 | 87.07  | 89.54 | 3.31E-01 | 36.58  | 45.05 | 4.17E-01 |
| cg01729739 | 27.16  | 11.17 | 1.50E-02 | 50.97  | 23.85 | 3.26E-02 | -0.71   | 22.63  | 9.75E-01 | 23.26  | 17.60 | 1.86E-01 | 47.02  | 28.32 | 9.68E-02 |
| cg15197050 | -12.22 | 5.03  | 1.50E-02 | -21.47 | 12.80 | 9.33E-02 | -30.52  | 28.51  | 2.84E-01 | -11.32 | 5.85  | 5.29E-02 | 5.21   | 18.17 | 7.74E-01 |
| cg09611599 | 4.08   | 1.68  | 1.50E-02 | 2.23   | 2.38  | 3.50E-01 | 4.67    | 3.42   | 1.72E-01 | 4.77   | 6.35  | 4.53E-01 | 7.84   | 3.81  | 3.97E-02 |
| cg13916117 | -4.87  | 2.00  | 1.50E-02 | -5.80  | 2.95  | 4.95E-02 | -2.28   | 4.46   | 6.09E-01 | -7.78  | 6.04  | 1.97E-01 | -3.87  | 4.18  | 3.54E-01 |
| cg01541846 | -14.94 | 6.14  | 1.50E-02 | -28.15 | 16.19 | 8.20E-02 | -20.72  | 21.09  | 3.26E-01 | -9.83  | 7.36  | 1.82E-01 | -30.36 | 22.43 | 1.76E-01 |
| cg03874868 | 38.94  | 16.02 | 1.51E-02 | 37.47  | 25.18 | 1.37E-01 | 70.83   | 46.09  | 1.24E-01 | 9.77   | 33.63 | 7.71E-01 | 52.49  | 32.17 | 1.03E-01 |
| cg01979171 | 39.23  | 16.14 | 1.51E-02 | 29.14  | 22.26 | 1.90E-01 | 71.51   | 43.91  | 1.03E-01 | 17.43  | 12.99 | 1.80E-01 | 90.35  | 32.98 | 6.15E-03 |
| cg13024709 | 24.40  | 10.04 | 1.51E-02 | 62.34  | 33.42 | 6.22E-02 | -10.76  | 71.29  | 8.80E-01 | 19.32  | 11.39 | 8.99E-02 | 35.03  | 29.70 | 2.38E-01 |
| cg26417874 | 24.19  | 9.95  | 1.51E-02 | 19.81  | 18.54 | 2.85E-01 | 14.14   | 23.93  | 5.55E-01 | 14.55  | 17.09 | 3.94E-01 | 55.53  | 22.25 | 1.26E-02 |
| cg00169897 | 38.81  | 15.96 | 1.51E-02 | 43.31  | 21.91 | 4.81E-02 | 39.12   | 72.71  | 5.91E-01 | 80.73  | 54.45 | 1.38E-01 | 20.87  | 27.57 | 4.49E-01 |
| cg05616589 | -9.66  | 3.97  | 1.51E-02 | -10.74 | 5.77  | 6.24E-02 | -6.11   | 9.74   | 5.30E-01 | -4.11  | 11.88 | 7.29E-01 | -12.48 | 8.00  | 1.19E-01 |
| cg19192590 | -9.69  | 3.99  | 1.51E-02 | -11.22 | 5.43  | 3.89E-02 | -11.48  | 8.77   | 1.91E-01 | 12.60  | 17.58 | 4.74E-01 | -9.48  | 8.86  | 2.84E-01 |
| cg19704102 | 5.60   | 2.30  | 1.51E-02 | 2.40   | 3.76  | 5.23E-01 | 8.16    | 4.97   | 1.01E-01 | 9.11   | 4.16  | 2.86E-02 | 1.52   | 7.16  | 8.32E-01 |
| cg03270710 | 14.54  | 5.98  | 1.51E-02 | 16.99  | 10.86 | 1.18E-01 | 27.24   | 13.61  | 4.53E-02 | 0.01   | 11.05 | 9.99E-01 | 19.53  | 13.02 | 1.33E-01 |
| cg12461930 | 13.98  | 5.75  | 1.51E-02 | 27.14  | 10.88 | 1.26E-02 | 12.60   | 10.75  | 2.41E-01 | -0.69  | 12.35 | 9.55E-01 | 13.54  | 12.34 | 2.73E-01 |
| cg08791813 | 26.76  | 11.01 | 1.51E-02 | 9.26   | 20.98 | 6.59E-01 | -9.01   | 38.85  | 8.17E-01 | 35.19  | 15.63 | 2.44E-02 | 50.38  | 28.57 | 7.78E-02 |
| cg22767348 | -13.37 | 5.50  | 1.51E-02 | -18.28 | 11.03 | 9.76E-02 | -33.01  | 20.82  | 1.13E-01 | -9.22  | 7.15  | 1.97E-01 | -11.82 | 18.37 | 5.20E-01 |
| cg02140579 | 6.20   | 2.55  | 1.51E-02 | 9.59   | 3.58  | 7.42E-03 | 1.92    | 5.85   | 7.43E-01 | 4.67   | 7.09  | 5.10E-01 | 2.10   | 6.14  | 7.32E-01 |
| cg09347306 | -22.77 | 9.37  | 1.51E-02 | -40.53 | 17.32 | 1.93E-02 | 14.11   | 38.31  | 7.13E-01 | -25.42 | 15.83 | 1.08E-01 | -9.57  | 17.19 | 5.78E-01 |
| cg12619940 | 21.80  | 8.97  | 1.51E-02 | 13.35  | 13.98 | 3.40E-01 | 21.67   | 22.60  | 3.38E-01 | 29.90  | 17.09 | 8.02E-02 | 30.00  | 22.78 | 1.88E-01 |
| cg13372766 | -12.44 | 5.12  | 1.51E-02 | -5.00  | 10.97 | 6.49E-01 | -9.41   | 12.30  | 4.44E-01 | -23.20 | 9.40  | 1.36E-02 | -9.09  | 9.17  | 3.22E-01 |
| cg17419815 | 5.31   | 2.18  | 1.51E-02 | 3.69   | 3.02  | 2.22E-01 | 10.26   | 5.49   | 6.17E-02 | 6.66   | 4.91  | 1.75E-01 | 3.59   | 6.23  | 5.65E-01 |
| cg19061112 | -15.59 | 6.41  | 1.51E-02 | -17.66 | 11.54 | 1.26E-01 | -0.01   | 13.75  | 9.99E-01 | -16.19 | 11.05 | 1.43E-01 | -34.20 | 17.35 | 4.87E-02 |
| cg02969164 | -10.22 | 4.20  | 1.51E-02 | -11.18 | 10.31 | 2.78E-01 | -24.84  | 18.52  | 1.80E-01 | -7.10  | 5.09  | 1.63E-01 | -22.50 | 13.36 | 9.22E-02 |
| cg11311332 | -6.37  | 2.62  | 1.51E-02 | -6.19  | 4.77  | 1.94E-01 | -13.96  | 7.10   | 4.91E-02 | -2.19  | 4.27  | 6.08E-01 | -9.58  | 6.11  | 1.17E-01 |
| cg19324627 | 22.52  | 9.27  | 1.51E-02 | 37.70  | 17.76 | 3.38E-02 | 12.65   | 16.57  | 4.45E-01 | 10.54  | 18.21 | 5.63E-01 | 35.77  | 23.50 | 1.28E-01 |
| cg17861150 | 31.20  | 12.84 | 1.51E-02 | 35.26  | 21.43 | 9.99E-02 | -33.06  | 60.16  | 5.83E-01 | 26.68  | 18.87 | 1.57E-01 | 58.15  | 35.32 | 9.96E-02 |
| cg27211576 | 15.39  | 6.34  | 1.51E-02 | 14.51  | 9.58  | 1.30E-01 | 19.05   | 10.91  | 8.09E-02 | -3.96  | 21.11 | 8.51E-01 | 22.04  | 17.23 | 2.01E-01 |
| cg11916758 | 16.08  | 6.62  | 1.51E-02 | 12.84  | 13.43 | 3.39E-01 | -8.03   | 42.81  | 8.51E-01 | 20.58  | 8.31  | 1.33E-02 | 1.01   | 21.07 | 9.62E-01 |
| cg24921319 | 15.34  | 6.31  | 1.51E-02 | 15.00  | 8.92  | 9.27E-02 | 24.10   | 13.57  | 7.58E-02 | 8.98   | 16.84 | 5.94E-01 | 9.48   | 16.73 | 5.71E-01 |

|            |        |       |          |        |       |          |        |        |          |        |       |          |         |       |          |
|------------|--------|-------|----------|--------|-------|----------|--------|--------|----------|--------|-------|----------|---------|-------|----------|
| cg13210763 | -7.54  | 3.11  | 1.51E-02 | -7.01  | 4.42  | 1.13E-01 | -14.88 | 6.93   | 3.18E-02 | -1.45  | 8.98  | 8.72E-01 | -4.97   | 7.21  | 4.91E-01 |
| cg09032310 | 29.99  | 12.34 | 1.51E-02 | 52.28  | 30.16 | 8.30E-02 | 27.67  | 71.58  | 6.99E-01 | 24.46  | 15.51 | 1.15E-01 | 28.99   | 30.02 | 3.34E-01 |
| cg04534765 | 13.06  | 5.38  | 1.51E-02 | 25.83  | 12.88 | 4.50E-02 | 16.84  | 13.51  | 2.12E-01 | 12.89  | 9.06  | 1.55E-01 | 4.29    | 9.58  | 6.54E-01 |
| cg02820413 | 20.21  | 8.32  | 1.51E-02 | 22.42  | 13.96 | 1.08E-01 | 11.76  | 19.53  | 5.47E-01 | 19.24  | 14.75 | 1.92E-01 | 27.55   | 21.88 | 2.08E-01 |
| cg14665965 | 9.74   | 4.01  | 1.51E-02 | 10.12  | 8.54  | 2.36E-01 | 1.50   | 12.45  | 9.04E-01 | 14.73  | 5.31  | 5.51E-03 | -4.41   | 10.75 | 6.82E-01 |
| cg20159095 | -19.65 | 8.09  | 1.51E-02 | -30.19 | 14.88 | 4.24E-02 | -14.47 | 19.78  | 4.65E-01 | -11.89 | 13.11 | 3.65E-01 | -24.16  | 20.46 | 2.38E-01 |
| cg13046164 | 37.85  | 15.58 | 1.52E-02 | 90.47  | 48.91 | 6.44E-02 | -44.51 | 196.05 | 8.20E-01 | 29.84  | 17.17 | 8.23E-02 | 63.70   | 59.49 | 2.84E-01 |
| cg18308184 | 9.11   | 3.75  | 1.52E-02 | 9.89   | 5.32  | 6.29E-02 | 6.22   | 10.37  | 5.49E-01 | 18.93  | 12.89 | 1.42E-01 | 6.18    | 7.01  | 3.78E-01 |
| cg16016716 | 18.78  | 7.73  | 1.52E-02 | 13.15  | 12.29 | 2.85E-01 | 32.73  | 13.97  | 1.91E-02 | 13.02  | 18.20 | 4.74E-01 | 10.19   | 22.53 | 6.51E-01 |
| cg21177426 | -16.68 | 6.87  | 1.52E-02 | -25.40 | 12.20 | 3.74E-02 | -13.11 | 14.77  | 3.75E-01 | -9.46  | 12.54 | 4.51E-01 | -17.78  | 16.85 | 2.91E-01 |
| cg01286631 | -23.67 | 9.75  | 1.52E-02 | 17.77  | 30.48 | 5.60E-01 | -74.74 | 143.47 | 6.02E-01 | -27.22 | 10.68 | 1.08E-02 | -41.01  | 39.66 | 3.01E-01 |
| cg13387677 | -65.59 | 27.01 | 1.52E-02 | -49.99 | 70.99 | 4.81E-01 | 64.45  | 184.05 | 7.26E-01 | -65.55 | 32.09 | 4.11E-02 | -106.20 | 76.34 | 1.64E-01 |
| cg00133595 | 23.20  | 9.56  | 1.52E-02 | 25.51  | 44.87 | 5.70E-01 | 76.22  | 116.32 | 5.12E-01 | 22.43  | 10.12 | 2.67E-02 | 27.22   | 40.08 | 4.97E-01 |
| cg05062179 | 37.67  | 15.51 | 1.52E-02 | 44.62  | 23.92 | 6.21E-02 | 7.52   | 40.79  | 8.54E-01 | 43.34  | 30.08 | 1.50E-01 | 37.26   | 37.77 | 3.24E-01 |
| cg25188165 | -37.41 | 15.41 | 1.52E-02 | -11.46 | 24.00 | 6.33E-01 | -14.35 | 72.67  | 8.43E-01 | -74.79 | 31.46 | 1.74E-02 | -46.50  | 27.97 | 9.64E-02 |
| cg26115276 | 14.93  | 6.15  | 1.52E-02 | 13.97  | 7.44  | 6.06E-02 | -10.13 | 22.36  | 6.51E-01 | 34.21  | 42.85 | 4.25E-01 | 24.67   | 13.07 | 5.91E-02 |
| cg01757312 | 16.76  | 6.90  | 1.52E-02 | 28.01  | 11.24 | 1.27E-02 | 22.91  | 19.19  | 2.33E-01 | 18.01  | 16.11 | 2.63E-01 | -0.26   | 12.41 | 9.83E-01 |
| cg14774844 | -33.13 | 13.64 | 1.52E-02 | -51.23 | 40.77 | 2.09E-01 | 244.04 | 192.64 | 2.05E-01 | -31.45 | 15.03 | 3.64E-02 | -45.82  | 56.31 | 4.16E-01 |
| cg10779492 | 11.08  | 4.57  | 1.52E-02 | 13.36  | 4.98  | 7.26E-03 | 13.78  | 8.23   | 9.39E-02 | 20.70  | 8.72  | 1.76E-02 | -2.71   | 7.50  | 7.18E-01 |
| cg08374472 | 20.59  | 8.48  | 1.52E-02 | 18.79  | 13.52 | 1.65E-01 | 26.44  | 15.94  | 9.70E-02 | 5.84   | 21.49 | 7.86E-01 | 28.64   | 20.73 | 1.67E-01 |
| cg03943218 | 17.25  | 7.11  | 1.52E-02 | 36.69  | 15.25 | 1.61E-02 | 15.03  | 28.77  | 6.01E-01 | 16.56  | 10.41 | 1.12E-01 | 2.53    | 14.05 | 8.57E-01 |
| cg20309339 | -12.34 | 5.08  | 1.52E-02 | -8.79  | 10.02 | 3.81E-01 | -11.44 | 17.15  | 5.05E-01 | -11.99 | 7.03  | 8.82E-02 | -21.21  | 13.96 | 1.29E-01 |
| cg07308381 | -13.49 | 5.56  | 1.52E-02 | -15.45 | 8.73  | 7.69E-02 | -2.45  | 13.36  | 8.54E-01 | -16.05 | 11.67 | 1.69E-01 | -16.28  | 12.59 | 1.96E-01 |
| cg11291773 | -14.93 | 6.15  | 1.52E-02 | -15.72 | 14.09 | 2.64E-01 | -6.73  | 16.16  | 6.77E-01 | -12.13 | 8.97  | 1.77E-01 | -26.96  | 13.92 | 5.27E-02 |
| cg19222784 | -11.22 | 4.62  | 1.52E-02 | -20.35 | 7.26  | 5.07E-03 | -7.31  | 11.00  | 5.07E-01 | -3.10  | 9.31  | 7.39E-01 | -5.36   | 11.17 | 6.32E-01 |
| cg06898279 | 5.03   | 2.07  | 1.52E-02 | 4.91   | 2.87  | 8.66E-02 | 7.91   | 4.78   | 9.83E-02 | 8.03   | 6.11  | 1.88E-01 | 0.31    | 4.97  | 9.51E-01 |
| cg05788138 | -7.56  | 3.11  | 1.52E-02 | -10.09 | 5.51  | 6.71E-02 | -0.74  | 8.92   | 9.33E-01 | -7.28  | 4.87  | 1.36E-01 | -8.46   | 8.01  | 2.91E-01 |
| cg04351169 | 53.37  | 21.99 | 1.52E-02 | 50.83  | 42.82 | 2.35E-01 | 18.80  | 89.88  | 8.34E-01 | 35.53  | 15.25 | 1.98E-02 | 143.79  | 52.51 | 6.17E-03 |
| cg00170213 | 24.66  | 10.16 | 1.52E-02 | 21.84  | 14.39 | 1.29E-01 | 19.58  | 27.12  | 4.70E-01 | 62.31  | 36.35 | 8.65E-02 | 21.74   | 19.08 | 2.54E-01 |
| cg00405554 | 27.87  | 11.48 | 1.52E-02 | 23.25  | 16.24 | 1.52E-01 | 36.72  | 25.67  | 1.53E-01 | 72.40  | 40.74 | 7.56E-02 | 14.29   | 24.42 | 5.58E-01 |
| cg15920472 | -6.87  | 2.83  | 1.52E-02 | -6.21  | 5.05  | 2.18E-01 | -9.27  | 7.49   | 2.16E-01 | -7.69  | 4.53  | 8.97E-02 | -3.89   | 7.23  | 5.91E-01 |
| cg08486269 | 10.14  | 4.18  | 1.52E-02 | 14.58  | 5.71  | 1.06E-02 | 10.78  | 10.37  | 2.98E-01 | 11.17  | 14.90 | 4.54E-01 | -1.40   | 8.86  | 8.75E-01 |
| cg12010544 | -31.58 | 13.01 | 1.52E-02 | -28.64 | 16.74 | 8.72E-02 | 44.13  | 56.79  | 4.37E-01 | -42.93 | 36.66 | 2.42E-01 | -51.38  | 27.87 | 6.52E-02 |
| cg01714553 | -10.42 | 4.29  | 1.52E-02 | -12.12 | 6.80  | 7.47E-02 | -17.31 | 8.99   | 5.41E-02 | -15.16 | 11.92 | 2.03E-01 | 1.32    | 8.68  | 8.79E-01 |
| cg19785810 | -28.76 | 11.85 | 1.52E-02 | -13.29 | 17.03 | 4.35E-01 | -22.91 | 42.10  | 5.86E-01 | -42.13 | 24.88 | 9.04E-02 | -52.17  | 25.86 | 4.36E-02 |

|            |        |       |          |        |       |          |         |        |          |        |        |          |        |       |          |
|------------|--------|-------|----------|--------|-------|----------|---------|--------|----------|--------|--------|----------|--------|-------|----------|
| cg24573310 | -31.76 | 13.09 | 1.52E-02 | -10.56 | 43.54 | 8.08E-01 | -173.30 | 196.07 | 3.77E-01 | -31.45 | 14.22  | 2.69E-02 | -58.50 | 54.42 | 2.82E-01 |
| cg15130481 | 19.88  | 8.19  | 1.52E-02 | 31.52  | 17.10 | 6.52E-02 | 4.85    | 19.16  | 8.00E-01 | 18.17  | 11.85  | 1.25E-01 | 28.01  | 24.72 | 2.57E-01 |
| cg00578885 | 17.12  | 7.05  | 1.52E-02 | -0.42  | 19.01 | 9.82E-01 | 33.69   | 27.30  | 2.17E-01 | 16.29  | 8.29   | 4.94E-02 | 43.52  | 26.27 | 9.76E-02 |
| cg23460578 | 6.93   | 2.86  | 1.52E-02 | 6.76   | 4.09  | 9.83E-02 | 5.27    | 7.29   | 4.70E-01 | 14.66  | 9.00   | 1.03E-01 | 5.23   | 5.63  | 3.53E-01 |
| cg12892506 | 15.51  | 6.39  | 1.52E-02 | 33.53  | 16.78 | 4.57E-02 | 8.32    | 25.86  | 7.48E-01 | 12.83  | 8.10   | 1.13E-01 | 12.57  | 15.48 | 4.17E-01 |
| cg20388823 | 15.14  | 6.24  | 1.52E-02 | 12.05  | 8.72  | 1.67E-01 | 23.79   | 22.58  | 2.92E-01 | 42.95  | 27.67  | 1.21E-01 | 13.78  | 10.38 | 1.84E-01 |
| cg01928104 | 21.35  | 8.80  | 1.52E-02 | 18.02  | 17.97 | 3.16E-01 | -12.70  | 38.17  | 7.39E-01 | 22.86  | 11.14  | 4.02E-02 | 41.08  | 30.34 | 1.76E-01 |
| cg00815832 | -5.63  | 2.32  | 1.52E-02 | -3.96  | 3.27  | 2.26E-01 | -10.64  | 4.80   | 2.67E-02 | -4.81  | 9.30   | 6.05E-01 | -4.24  | 5.16  | 4.11E-01 |
| cg00964997 | 15.68  | 6.46  | 1.52E-02 | 17.04  | 10.07 | 9.05E-02 | 12.35   | 17.59  | 4.83E-01 | 32.57  | 16.44  | 4.76E-02 | 6.57   | 11.82 | 5.78E-01 |
| cg08741280 | 19.61  | 8.08  | 1.52E-02 | 17.18  | 22.54 | 4.46E-01 | 21.47   | 27.02  | 4.27E-01 | 15.47  | 9.68   | 1.10E-01 | 55.07  | 27.65 | 4.64E-02 |
| cg00076538 | 20.55  | 8.47  | 1.52E-02 | 15.56  | 21.43 | 4.68E-01 | 33.52   | 36.76  | 3.62E-01 | 19.47  | 10.60  | 6.61E-02 | 25.73  | 21.76 | 2.37E-01 |
| cg13466180 | 6.81   | 2.81  | 1.53E-02 | 5.92   | 3.65  | 1.05E-01 | 11.44   | 6.04   | 5.81E-02 | 2.61   | 11.07  | 8.14E-01 | 5.25   | 7.88  | 5.05E-01 |
| cg23783747 | -51.53 | 21.24 | 1.53E-02 | -9.85  | 59.18 | 8.68E-01 | -288.83 | 200.43 | 1.50E-01 | -59.02 | 24.45  | 1.58E-02 | -23.48 | 65.49 | 7.20E-01 |
| cg20462888 | 9.00   | 3.71  | 1.53E-02 | 8.38   | 7.23  | 2.46E-01 | -4.45   | 10.01  | 6.56E-01 | 11.40  | 5.76   | 4.77E-02 | 14.51  | 8.64  | 9.32E-02 |
| cg00639289 | 32.72  | 13.48 | 1.53E-02 | 41.20  | 17.94 | 2.17E-02 | 8.85    | 55.21  | 8.73E-01 | 47.61  | 32.94  | 1.48E-01 | 4.51   | 29.57 | 8.79E-01 |
| cg09596131 | -10.47 | 4.31  | 1.53E-02 | -14.65 | 5.95  | 1.38E-02 | -1.03   | 11.82  | 9.31E-01 | -2.93  | 11.96  | 8.06E-01 | -10.66 | 9.39  | 2.56E-01 |
| cg03014634 | 16.17  | 6.67  | 1.53E-02 | 21.42  | 10.16 | 3.50E-02 | 21.66   | 13.83  | 1.17E-01 | 2.20   | 19.87  | 9.12E-01 | 7.43   | 14.08 | 5.98E-01 |
| cg20710519 | 8.37   | 3.45  | 1.53E-02 | 9.15   | 6.21  | 1.40E-01 | 15.38   | 7.29   | 3.48E-02 | 9.25   | 7.00   | 1.86E-01 | -0.65  | 7.27  | 9.29E-01 |
| cg19998644 | 15.89  | 6.55  | 1.53E-02 | 5.02   | 8.09  | 5.35E-01 | 19.34   | 10.68  | 7.01E-02 | 9.29   | 16.41  | 5.71E-01 | 32.90  | 11.47 | 4.14E-03 |
| cg14813603 | 19.28  | 7.95  | 1.53E-02 | 18.21  | 11.37 | 1.09E-01 | 32.22   | 29.12  | 2.69E-01 | 52.59  | 29.26  | 7.23E-02 | 11.30  | 13.19 | 3.91E-01 |
| cg14109388 | -10.26 | 4.23  | 1.53E-02 | -18.77 | 7.84  | 1.67E-02 | -0.07   | 10.72  | 9.95E-01 | -5.77  | 6.96   | 4.07E-01 | -14.48 | 9.88  | 1.43E-01 |
| cg23856090 | 14.67  | 6.05  | 1.53E-02 | 15.93  | 18.85 | 3.98E-01 | 40.91   | 45.83  | 3.72E-01 | 15.57  | 6.63   | 1.88E-02 | -13.41 | 27.71 | 6.28E-01 |
| cg07179669 | 24.64  | 10.16 | 1.53E-02 | 19.47  | 12.84 | 1.29E-01 | 19.63   | 44.92  | 6.62E-01 | 35.12  | 25.45  | 1.68E-01 | 35.82  | 25.15 | 1.54E-01 |
| cg23216612 | -7.87  | 3.24  | 1.53E-02 | -8.03  | 5.14  | 1.18E-01 | -9.11   | 5.59   | 1.03E-01 | -2.12  | 10.32  | 8.37E-01 | -8.37  | 7.94  | 2.92E-01 |
| cg23517548 | 50.64  | 20.88 | 1.53E-02 | 31.75  | 20.93 | 1.29E-01 | 48.77   | 76.39  | 5.23E-01 | -29.19 | 95.19  | 7.59E-01 | 97.92  | 32.91 | 2.92E-03 |
| cg15921911 | 7.79   | 3.21  | 1.53E-02 | 6.18   | 4.29  | 1.50E-01 | 16.38   | 7.59   | 3.09E-02 | 7.40   | 8.23   | 3.69E-01 | 2.46   | 9.70  | 8.00E-01 |
| cg11144056 | 38.65  | 15.93 | 1.53E-02 | -0.18  | 52.95 | 9.97E-01 | -119.93 | 180.88 | 5.07E-01 | 42.63  | 17.56  | 1.52E-02 | 57.51  | 57.07 | 3.14E-01 |
| cg03832040 | 23.80  | 9.81  | 1.53E-02 | 26.87  | 15.63 | 8.56E-02 | 37.21   | 17.37  | 3.22E-02 | -6.62  | 19.52  | 7.34E-01 | 37.03  | 23.56 | 1.16E-01 |
| cg01628737 | 27.83  | 11.47 | 1.53E-02 | 48.66  | 24.79 | 4.96E-02 | 14.29   | 24.83  | 5.65E-01 | 15.77  | 11.44  | 1.68E-01 | 69.75  | 31.37 | 2.62E-02 |
| cg06272678 | -48.82 | 20.13 | 1.53E-02 | -34.30 | 59.46 | 5.64E-01 | -161.41 | 200.51 | 4.21E-01 | -56.50 | 22.31  | 1.13E-02 | 45.02  | 81.46 | 5.80E-01 |
| cg07834408 | 97.46  | 40.19 | 1.53E-02 | 85.55  | 58.08 | 1.41E-01 | 200.69  | 176.51 | 2.56E-01 | 33.23  | 86.70  | 7.01E-01 | 153.06 | 79.66 | 5.47E-02 |
| cg17479280 | -7.99  | 3.29  | 1.53E-02 | -7.49  | 4.02  | 6.27E-02 | -11.64  | 8.56   | 1.74E-01 | -4.32  | 12.34  | 7.26E-01 | -8.49  | 9.91  | 3.92E-01 |
| cg06834503 | -51.62 | 21.29 | 1.53E-02 | -76.09 | 26.49 | 4.07E-03 | 15.28   | 119.11 | 8.98E-01 | -39.12 | 107.91 | 7.17E-01 | -5.09  | 39.98 | 8.99E-01 |
| cg13987226 | 44.45  | 18.33 | 1.53E-02 | 37.49  | 25.48 | 1.41E-01 | 79.48   | 51.31  | 1.21E-01 | 23.60  | 44.61  | 5.97E-01 | 58.67  | 42.48 | 1.67E-01 |
| cg23416788 | 39.61  | 16.34 | 1.53E-02 | 13.04  | 17.72 | 4.62E-01 | 29.40   | 28.01  | 2.94E-01 | 94.19  | 53.57  | 7.87E-02 | 65.72  | 22.03 | 2.85E-03 |

|            |        |       |          |        |       |          |        |        |          |        |       |          |        |       |          |
|------------|--------|-------|----------|--------|-------|----------|--------|--------|----------|--------|-------|----------|--------|-------|----------|
| cg24612707 | -8.64  | 3.56  | 1.53E-02 | -11.70 | 4.90  | 1.70E-02 | -2.96  | 8.06   | 7.14E-01 | -7.51  | 14.06 | 5.93E-01 | -6.61  | 7.75  | 3.94E-01 |
| cg21292067 | 10.97  | 4.52  | 1.53E-02 | 11.73  | 5.90  | 4.69E-02 | 17.64  | 10.38  | 8.95E-02 | 16.99  | 16.00 | 2.88E-01 | -4.35  | 11.94 | 7.16E-01 |
| cg14131289 | -15.84 | 6.53  | 1.53E-02 | -16.14 | 11.33 | 1.55E-01 | -21.54 | 17.53  | 2.19E-01 | -7.97  | 10.02 | 4.26E-01 | -39.59 | 20.32 | 5.14E-02 |
| cg08822625 | 6.80   | 2.80  | 1.53E-02 | 8.05   | 4.08  | 4.85E-02 | 9.09   | 6.19   | 1.42E-01 | 1.64   | 6.54  | 8.01E-01 | 5.99   | 7.54  | 4.27E-01 |
| cg00022145 | 18.69  | 7.71  | 1.53E-02 | 21.19  | 15.64 | 1.75E-01 | 29.65  | 17.59  | 9.19E-02 | 14.24  | 11.57 | 2.18E-01 | 12.62  | 22.18 | 5.69E-01 |
| cg10287970 | 7.51   | 3.10  | 1.53E-02 | 7.31   | 3.95  | 6.47E-02 | 10.38  | 8.70   | 2.33E-01 | 11.28  | 8.38  | 1.79E-01 | 1.38   | 8.86  | 8.76E-01 |
| cg24783510 | -50.01 | 20.63 | 1.53E-02 | -56.18 | 25.39 | 2.69E-02 | -65.77 | 70.79  | 3.53E-01 | 70.85  | 97.11 | 4.66E-01 | -50.19 | 45.01 | 2.65E-01 |
| cg13573513 | 6.72   | 2.77  | 1.53E-02 | 7.20   | 4.31  | 9.48E-02 | 11.10  | 6.97   | 1.11E-01 | 6.92   | 4.73  | 1.44E-01 | -4.51  | 9.47  | 6.34E-01 |
| cg25921544 | -14.48 | 5.97  | 1.53E-02 | -19.34 | 10.09 | 5.52E-02 | -13.08 | 13.53  | 3.34E-01 | -5.03  | 12.58 | 6.89E-01 | -17.55 | 12.48 | 1.60E-01 |
| cg11912330 | 19.83  | 8.18  | 1.53E-02 | -6.43  | 25.88 | 8.04E-01 | -22.31 | 78.98  | 7.78E-01 | 23.37  | 9.71  | 1.61E-02 | 22.97  | 19.27 | 2.33E-01 |
| cg04510639 | 13.45  | 5.55  | 1.53E-02 | 11.33  | 10.09 | 2.61E-01 | -4.95  | 18.01  | 7.84E-01 | 16.87  | 8.28  | 4.17E-02 | 19.00  | 14.15 | 1.79E-01 |
| cg12432303 | -13.42 | 5.54  | 1.54E-02 | -6.93  | 12.46 | 5.78E-01 | -27.48 | 23.75  | 2.47E-01 | -15.59 | 6.83  | 2.24E-02 | -3.43  | 18.35 | 8.52E-01 |
| cg26067203 | 26.52  | 10.94 | 1.54E-02 | 30.15  | 32.39 | 3.52E-01 | 49.10  | 56.97  | 3.89E-01 | 26.67  | 13.31 | 4.51E-02 | 18.73  | 26.29 | 4.76E-01 |
| cg06727060 | 18.80  | 7.76  | 1.54E-02 | 8.90   | 13.56 | 5.11E-01 | 32.54  | 21.56  | 1.31E-01 | 23.07  | 12.69 | 6.90E-02 | 18.01  | 18.84 | 3.39E-01 |
| cg19162768 | 16.64  | 6.87  | 1.54E-02 | 25.74  | 8.45  | 2.32E-03 | 4.03   | 17.90  | 8.22E-01 | 46.41  | 36.37 | 2.02E-01 | 5.53   | 10.68 | 6.04E-01 |
| cg17513325 | -24.21 | 9.99  | 1.54E-02 | -30.68 | 13.99 | 2.83E-02 | -15.95 | 41.36  | 7.00E-01 | -23.91 | 25.61 | 3.50E-01 | -14.32 | 18.89 | 4.48E-01 |
| cg00414013 | 11.39  | 4.70  | 1.54E-02 | 4.55   | 12.63 | 7.19E-01 | 2.28   | 13.13  | 8.62E-01 | 16.23  | 5.94  | 6.29E-03 | 2.89   | 14.32 | 8.40E-01 |
| cg06674793 | 36.57  | 15.09 | 1.54E-02 | 43.64  | 17.64 | 1.34E-02 | 0.20   | 79.01  | 9.98E-01 | 84.11  | 64.52 | 1.92E-01 | 0.17   | 35.86 | 9.96E-01 |
| cg11728821 | -9.15  | 3.78  | 1.54E-02 | -6.45  | 6.52  | 3.23E-01 | -4.17  | 10.05  | 6.78E-01 | -12.69 | 6.36  | 4.59E-02 | -11.24 | 9.12  | 2.18E-01 |
| cg12832204 | -9.78  | 4.04  | 1.54E-02 | -16.03 | 6.08  | 8.34E-03 | -14.01 | 8.44   | 9.69E-02 | -0.32  | 5.99  | 9.58E-01 | -11.45 | 9.10  | 2.08E-01 |
| cg22904401 | -20.09 | 8.29  | 1.54E-02 | -9.39  | 10.66 | 3.78E-01 | -25.79 | 15.19  | 8.95E-02 | -42.04 | 13.74 | 2.22E-03 | -6.08  | 15.07 | 6.86E-01 |
| cg06174296 | 23.16  | 9.56  | 1.54E-02 | 28.62  | 17.39 | 9.98E-02 | -3.39  | 22.08  | 8.78E-01 | 29.65  | 15.76 | 6.00E-02 | 29.68  | 25.25 | 2.40E-01 |
| cg09036154 | -47.21 | 19.48 | 1.54E-02 | -78.08 | 42.24 | 6.45E-02 | -81.97 | 209.21 | 6.95E-01 | -19.77 | 22.46 | 3.79E-01 | -91.80 | 40.23 | 2.25E-02 |
| cg03272932 | -12.63 | 5.21  | 1.54E-02 | -12.94 | 8.88  | 1.45E-01 | -4.46  | 11.00  | 6.85E-01 | -12.73 | 10.32 | 2.18E-01 | -22.26 | 12.41 | 7.28E-02 |
| cg10253022 | -27.22 | 11.23 | 1.54E-02 | 1.12   | 35.99 | 9.75E-01 | -72.64 | 154.20 | 6.38E-01 | -27.74 | 12.28 | 2.38E-02 | -62.04 | 45.93 | 1.77E-01 |
| cg17222755 | -19.42 | 8.02  | 1.54E-02 | -24.39 | 13.66 | 7.42E-02 | -12.52 | 19.96  | 5.30E-01 | -13.45 | 15.28 | 3.79E-01 | -24.18 | 17.12 | 1.58E-01 |
| cg12565585 | 25.37  | 10.47 | 1.54E-02 | 49.49  | 26.09 | 5.78E-02 | 21.15  | 35.69  | 5.53E-01 | 22.10  | 14.03 | 1.15E-01 | 16.68  | 23.66 | 4.81E-01 |
| cg06705017 | 6.87   | 2.84  | 1.54E-02 | 7.27   | 3.92  | 6.35E-02 | 7.49   | 6.47   | 2.47E-01 | 6.30   | 7.19  | 3.81E-01 | 5.03   | 7.94  | 5.27E-01 |
| cg06191068 | 12.44  | 5.13  | 1.54E-02 | 18.38  | 7.56  | 1.51E-02 | 13.92  | 13.43  | 3.00E-01 | 14.41  | 12.14 | 2.35E-01 | -3.04  | 11.11 | 7.84E-01 |
| cg12902405 | -12.37 | 5.11  | 1.54E-02 | -11.02 | 10.11 | 2.75E-01 | -12.40 | 19.48  | 5.24E-01 | -11.87 | 6.78  | 7.98E-02 | -18.13 | 15.51 | 2.42E-01 |
| cg17816908 | 19.77  | 8.16  | 1.54E-02 | 30.38  | 14.20 | 3.24E-02 | 4.32   | 23.02  | 8.51E-01 | 18.35  | 14.45 | 2.04E-01 | 14.84  | 17.22 | 3.89E-01 |
| cg22931362 | -39.20 | 16.18 | 1.54E-02 | -34.41 | 30.53 | 2.60E-01 | 14.79  | 165.57 | 9.29E-01 | -40.76 | 20.54 | 4.72E-02 | -49.22 | 54.30 | 3.65E-01 |
| cg00406022 | 7.11   | 2.94  | 1.54E-02 | 8.68   | 4.06  | 3.27E-02 | 3.55   | 7.53   | 6.37E-01 | 14.95  | 9.33  | 1.09E-01 | 2.48   | 6.15  | 6.86E-01 |
| cg08482979 | 8.14   | 3.36  | 1.54E-02 | 8.15   | 4.33  | 5.99E-02 | 15.48  | 8.72   | 7.58E-02 | 12.02  | 9.56  | 2.09E-01 | -4.32  | 9.43  | 6.47E-01 |
| cg15712777 | 9.63   | 3.98  | 1.54E-02 | 14.51  | 5.71  | 1.10E-02 | 7.52   | 10.10  | 4.56E-01 | 11.90  | 10.54 | 2.59E-01 | -1.23  | 8.52  | 8.85E-01 |

|            |        |       |          |        |       |          |        |        |          |        |       |          |        |       |          |
|------------|--------|-------|----------|--------|-------|----------|--------|--------|----------|--------|-------|----------|--------|-------|----------|
| cg22960907 | 40.85  | 16.86 | 1.54E-02 | 28.83  | 21.54 | 1.81E-01 | 94.86  | 59.02  | 1.08E-01 | 91.36  | 67.78 | 1.78E-01 | 40.13  | 34.18 | 2.40E-01 |
| cg25159668 | -11.46 | 4.73  | 1.54E-02 | -16.01 | 11.29 | 1.56E-01 | -2.13  | 23.34  | 9.27E-01 | -10.02 | 5.61  | 7.41E-02 | -19.66 | 17.47 | 2.60E-01 |
| cg03323067 | 9.81   | 4.05  | 1.54E-02 | 8.95   | 5.88  | 1.28E-01 | 14.09  | 8.18   | 8.50E-02 | 5.86   | 19.14 | 7.60E-01 | 7.84   | 8.34  | 3.47E-01 |
| cg18427787 | 13.52  | 5.58  | 1.54E-02 | 24.29  | 10.72 | 2.35E-02 | 16.37  | 20.99  | 4.36E-01 | 8.61   | 7.67  | 2.61E-01 | 9.49   | 15.61 | 5.43E-01 |
| cg15825104 | -26.46 | 10.92 | 1.54E-02 | -32.05 | 24.14 | 1.84E-01 | 29.89  | 53.60  | 5.77E-01 | -23.57 | 13.59 | 8.29E-02 | -54.81 | 33.27 | 9.95E-02 |
| cg13500388 | 11.08  | 4.57  | 1.54E-02 | 15.32  | 7.00  | 2.86E-02 | 15.23  | 10.91  | 1.63E-01 | 0.90   | 9.80  | 9.27E-01 | 9.28   | 10.81 | 3.91E-01 |
| cg27291304 | 10.28  | 4.24  | 1.54E-02 | 13.51  | 6.16  | 2.82E-02 | 16.35  | 9.28   | 7.81E-02 | -4.92  | 15.93 | 7.58E-01 | 3.23   | 8.58  | 7.07E-01 |
| cg06937491 | -49.72 | 20.53 | 1.54E-02 | -49.49 | 26.13 | 5.83E-02 | 203.99 | 130.63 | 1.18E-01 | -53.73 | 31.11 | 8.41E-02 | -66.25 | 30.87 | 3.19E-02 |
| cg07085664 | -18.24 | 7.53  | 1.54E-02 | -10.40 | 14.45 | 4.72E-01 | -34.63 | 37.96  | 3.62E-01 | -17.88 | 10.05 | 7.52E-02 | -31.51 | 21.12 | 1.36E-01 |
| cg13682095 | 24.76  | 10.22 | 1.54E-02 | 8.36   | 15.37 | 5.86E-01 | 147.90 | 155.68 | 3.42E-01 | 37.60  | 14.46 | 9.29E-03 | 30.46  | 44.47 | 4.93E-01 |
| cg25609480 | 21.32  | 8.80  | 1.54E-02 | 18.78  | 18.05 | 2.98E-01 | 7.26   | 32.64  | 8.24E-01 | 27.87  | 11.38 | 1.43E-02 | -4.04  | 29.25 | 8.90E-01 |
| cg05850338 | 6.08   | 2.51  | 1.55E-02 | 4.29   | 3.94  | 2.77E-01 | 10.51  | 5.18   | 4.25E-02 | 6.50   | 4.85  | 1.80E-01 | 1.40   | 8.30  | 8.66E-01 |
| cg19159842 | 17.90  | 7.39  | 1.55E-02 | 24.21  | 10.90 | 2.63E-02 | 14.89  | 14.85  | 3.16E-01 | 1.98   | 20.31 | 9.22E-01 | 17.61  | 18.48 | 3.41E-01 |
| cg15745921 | 36.36  | 15.01 | 1.55E-02 | 57.72  | 23.45 | 1.38E-02 | 14.37  | 41.58  | 7.30E-01 | 12.22  | 35.44 | 7.30E-01 | 30.80  | 28.37 | 2.78E-01 |
| cg04982401 | 19.03  | 7.86  | 1.55E-02 | 27.80  | 25.31 | 2.72E-01 | 13.22  | 69.03  | 8.48E-01 | 18.36  | 9.07  | 4.28E-02 | 17.13  | 21.09 | 4.17E-01 |
| cg13175532 | 16.44  | 6.79  | 1.55E-02 | 21.48  | 10.59 | 4.24E-02 | -3.10  | 20.06  | 8.77E-01 | 12.94  | 18.37 | 4.81E-01 | 18.34  | 11.69 | 1.17E-01 |
| cg08657851 | -24.88 | 10.27 | 1.55E-02 | -39.08 | 17.93 | 2.93E-02 | 18.72  | 27.35  | 4.94E-01 | -27.44 | 17.62 | 1.19E-01 | -28.25 | 19.70 | 1.52E-01 |
| cg09971646 | 6.19   | 2.56  | 1.55E-02 | 6.76   | 3.66  | 6.46E-02 | -1.30  | 6.93   | 8.51E-01 | 5.31   | 6.01  | 3.77E-01 | 10.86  | 5.81  | 6.16E-02 |
| cg08084454 | 22.90  | 9.46  | 1.55E-02 | 36.74  | 29.74 | 2.17E-01 | 49.68  | 162.34 | 7.60E-01 | 21.54  | 10.43 | 3.89E-02 | 17.83  | 34.95 | 6.10E-01 |
| cg13046832 | 19.55  | 8.08  | 1.55E-02 | 36.57  | 19.71 | 6.36E-02 | 27.79  | 34.96  | 4.27E-01 | 12.53  | 10.95 | 2.52E-01 | 21.81  | 16.69 | 1.91E-01 |
| cg03456220 | 21.56  | 8.90  | 1.55E-02 | 42.00  | 18.13 | 2.05E-02 | 13.13  | 19.73  | 5.06E-01 | 13.41  | 13.10 | 3.06E-01 | 27.45  | 29.16 | 3.47E-01 |
| cg23847069 | -7.69  | 3.18  | 1.55E-02 | -7.05  | 4.10  | 8.52E-02 | -10.98 | 7.75   | 1.57E-01 | 1.45   | 11.56 | 9.00E-01 | -11.12 | 8.09  | 1.69E-01 |
| cg14720706 | 28.65  | 11.83 | 1.55E-02 | 25.60  | 15.03 | 8.85E-02 | 41.25  | 37.81  | 2.75E-01 | 28.96  | 42.40 | 4.95E-01 | 31.73  | 26.19 | 2.26E-01 |
| cg19182008 | -7.90  | 3.26  | 1.55E-02 | -4.75  | 6.29  | 4.50E-01 | -7.29  | 10.10  | 4.70E-01 | -7.56  | 4.60  | 1.00E-01 | -16.70 | 9.30  | 7.27E-02 |
| cg04139007 | -15.78 | 6.52  | 1.55E-02 | -24.00 | 9.31  | 9.91E-03 | -8.99  | 13.63  | 5.09E-01 | -15.03 | 22.27 | 5.00E-01 | -3.39  | 14.75 | 8.18E-01 |
| cg04018448 | 16.02  | 6.62  | 1.55E-02 | 17.89  | 15.90 | 2.60E-01 | -16.96 | 66.92  | 8.00E-01 | 12.87  | 7.89  | 1.03E-01 | 35.26  | 19.55 | 7.12E-02 |
| cg22602019 | 44.92  | 18.55 | 1.55E-02 | 34.65  | 22.31 | 1.20E-01 | 99.30  | 65.38  | 1.29E-01 | 50.13  | 77.89 | 5.20E-01 | 59.07  | 44.85 | 1.88E-01 |
| cg17820025 | 21.63  | 8.94  | 1.55E-02 | 35.59  | 15.33 | 2.03E-02 | 17.75  | 15.64  | 2.57E-01 | 18.71  | 21.75 | 3.90E-01 | 3.59   | 21.98 | 8.70E-01 |
| cg22170528 | 19.67  | 8.12  | 1.55E-02 | 15.39  | 21.25 | 4.69E-01 | -10.77 | 27.24  | 6.93E-01 | 25.81  | 9.73  | 8.02E-03 | 5.82   | 31.10 | 8.52E-01 |
| cg17226042 | 7.34   | 3.03  | 1.55E-02 | 3.24   | 4.41  | 4.62E-01 | 12.91  | 5.76   | 2.50E-02 | 14.05  | 7.34  | 5.55E-02 | 1.63   | 8.00  | 8.39E-01 |
| cg24149898 | -37.59 | 15.53 | 1.55E-02 | -52.95 | 48.51 | 2.75E-01 | -11.17 | 227.15 | 9.61E-01 | -39.46 | 17.22 | 2.20E-02 | -0.40  | 54.94 | 9.94E-01 |
| cg03202804 | 21.27  | 8.79  | 1.55E-02 | 23.62  | 13.11 | 7.16E-02 | 21.96  | 35.46  | 5.36E-01 | -5.22  | 30.52 | 8.64E-01 | 23.96  | 13.78 | 8.21E-02 |
| cg21631443 | -19.30 | 7.97  | 1.55E-02 | -28.26 | 13.57 | 3.73E-02 | -20.23 | 17.50  | 2.48E-01 | -12.29 | 15.68 | 4.33E-01 | -11.49 | 18.37 | 5.32E-01 |
| cg16380285 | 24.16  | 9.98  | 1.55E-02 | 26.92  | 21.26 | 2.06E-01 | 33.94  | 20.69  | 1.01E-01 | 19.55  | 15.71 | 2.13E-01 | 16.97  | 26.38 | 5.20E-01 |
| cg20944315 | -10.34 | 4.27  | 1.55E-02 | -15.30 | 5.59  | 6.20E-03 | -2.06  | 10.86  | 8.50E-01 | 5.54   | 12.30 | 6.52E-01 | -12.80 | 9.58  | 1.82E-01 |

|            |        |       |          |        |       |          |         |        |          |        |       |          |        |       |          |
|------------|--------|-------|----------|--------|-------|----------|---------|--------|----------|--------|-------|----------|--------|-------|----------|
| cg11100481 | 11.26  | 4.65  | 1.55E-02 | 6.26   | 3.95  | 1.13E-01 | 20.84   | 6.80   | 2.17E-03 | 22.73  | 12.09 | 6.01E-02 | 2.81   | 8.05  | 7.27E-01 |
| cg01889899 | -18.25 | 7.54  | 1.55E-02 | -28.87 | 14.06 | 4.00E-02 | 1.11    | 17.31  | 9.49E-01 | -18.88 | 12.95 | 1.45E-01 | -20.42 | 17.59 | 2.46E-01 |
| cg08739188 | 18.67  | 7.72  | 1.55E-02 | 16.35  | 11.76 | 1.65E-01 | 31.04   | 21.12  | 1.42E-01 | 21.70  | 16.00 | 1.75E-01 | 12.02  | 17.11 | 4.82E-01 |
| cg13356175 | 10.05  | 4.15  | 1.55E-02 | 12.73  | 6.04  | 3.50E-02 | 4.99    | 8.61   | 5.62E-01 | -0.69  | 16.65 | 9.67E-01 | 12.50  | 8.60  | 1.46E-01 |
| cg08955941 | 9.37   | 3.87  | 1.55E-02 | 7.23   | 5.57  | 1.94E-01 | 13.90   | 8.66   | 1.09E-01 | 21.59  | 9.60  | 2.46E-02 | 0.71   | 8.18  | 9.31E-01 |
| cg17896129 | 16.89  | 6.98  | 1.55E-02 | 17.45  | 21.61 | 4.19E-01 | 16.23   | 70.45  | 8.18E-01 | 18.06  | 7.76  | 2.00E-02 | 3.88   | 25.22 | 8.78E-01 |
| cg08098256 | -8.37  | 3.46  | 1.55E-02 | -4.62  | 6.15  | 4.53E-01 | -9.29   | 10.00  | 3.53E-01 | -6.15  | 3.99  | 1.23E-01 | -24.13 | 9.32  | 9.64E-03 |
| cg23244192 | -40.93 | 16.92 | 1.55E-02 | -36.46 | 35.55 | 3.05E-01 | -167.06 | 152.13 | 2.72E-01 | -46.72 | 20.63 | 2.35E-02 | 9.18   | 56.82 | 8.72E-01 |
| cg16442298 | -15.79 | 6.53  | 1.56E-02 | -23.83 | 9.40  | 1.12E-02 | -4.83   | 15.96  | 7.62E-01 | -18.78 | 17.82 | 2.92E-01 | -4.47  | 14.03 | 7.50E-01 |
| cg22495921 | 23.21  | 9.60  | 1.56E-02 | 31.72  | 18.61 | 8.83E-02 | 31.31   | 18.10  | 8.36E-02 | 12.49  | 16.38 | 4.46E-01 | 15.42  | 28.91 | 5.94E-01 |
| cg10971346 | -38.44 | 15.89 | 1.56E-02 | -39.85 | 19.61 | 4.22E-02 | -47.99  | 63.47  | 4.50E-01 | -25.15 | 38.67 | 5.15E-01 | -44.78 | 47.42 | 3.45E-01 |
| cg13584784 | -16.73 | 6.92  | 1.56E-02 | -22.19 | 11.52 | 5.40E-02 | -4.26   | 24.48  | 8.62E-01 | -16.72 | 11.86 | 1.59E-01 | -12.32 | 14.77 | 4.04E-01 |
| cg17738213 | 10.74  | 4.44  | 1.56E-02 | 11.17  | 6.15  | 6.96E-02 | 4.29    | 9.88   | 6.64E-01 | 2.93   | 19.14 | 8.78E-01 | 17.46  | 9.39  | 6.30E-02 |
| cg27003776 | -71.99 | 29.76 | 1.56E-02 | -81.57 | 41.42 | 4.89E-02 | 58.10   | 144.72 | 6.88E-01 | -59.99 | 60.46 | 3.21E-01 | -89.43 | 66.71 | 1.80E-01 |
| cg00870242 | -11.44 | 4.73  | 1.56E-02 | -18.07 | 6.81  | 7.97E-03 | -9.98   | 12.11  | 4.10E-01 | 5.60   | 12.36 | 6.50E-01 | -9.24  | 10.10 | 3.60E-01 |
| cg03337886 | 18.43  | 7.62  | 1.56E-02 | 19.18  | 13.92 | 1.68E-01 | 17.73   | 14.80  | 2.31E-01 | 8.59   | 13.91 | 5.37E-01 | 39.92  | 20.70 | 5.37E-02 |
| cg16283183 | 6.74   | 2.79  | 1.56E-02 | 6.52   | 3.45  | 5.87E-02 | 11.10   | 6.73   | 9.90E-02 | 10.01  | 11.56 | 3.86E-01 | -0.02  | 8.14  | 9.98E-01 |
| cg17787502 | -13.85 | 5.72  | 1.56E-02 | -17.88 | 13.02 | 1.70E-01 | -23.76  | 18.18  | 1.91E-01 | -14.41 | 7.60  | 5.80E-02 | 0.96   | 15.26 | 9.50E-01 |
| cg11828741 | -10.55 | 4.36  | 1.56E-02 | -19.41 | 10.66 | 6.87E-02 | -30.92  | 18.82  | 1.00E-01 | -5.57  | 4.82  | 2.48E-01 | -16.58 | 11.84 | 1.61E-01 |
| cg04682135 | -11.61 | 4.80  | 1.56E-02 | -9.94  | 6.61  | 1.32E-01 | -6.26   | 12.54  | 6.18E-01 | -8.76  | 12.29 | 4.76E-01 | -23.77 | 11.55 | 3.95E-02 |
| cg17795158 | 15.98  | 6.61  | 1.56E-02 | 21.69  | 10.94 | 4.75E-02 | 5.83    | 16.56  | 7.25E-01 | 14.68  | 19.20 | 4.45E-01 | 15.11  | 11.05 | 1.71E-01 |
| cg23642826 | 15.29  | 6.32  | 1.56E-02 | 15.51  | 9.00  | 8.47E-02 | 20.85   | 13.82  | 1.32E-01 | 36.68  | 19.56 | 6.08E-02 | -2.93  | 14.42 | 8.39E-01 |
| cg08486875 | 11.90  | 4.92  | 1.56E-02 | 14.86  | 7.51  | 4.78E-02 | 29.02   | 12.71  | 2.24E-02 | 5.08   | 9.59  | 5.96E-01 | 3.28   | 10.09 | 7.45E-01 |
| cg15166089 | 17.46  | 7.22  | 1.56E-02 | 17.46  | 11.49 | 1.29E-01 | 16.93   | 13.78  | 2.19E-01 | 22.41  | 17.21 | 1.93E-01 | 12.80  | 18.33 | 4.85E-01 |
| cg04310063 | -9.91  | 4.10  | 1.56E-02 | -5.64  | 11.36 | 6.19E-01 | -21.73  | 21.04  | 3.02E-01 | -10.26 | 4.65  | 2.75E-02 | -7.01  | 17.19 | 6.83E-01 |
| cg13380511 | -35.01 | 14.48 | 1.56E-02 | -98.62 | 55.60 | 7.61E-02 | -148.43 | 196.25 | 4.49E-01 | -29.19 | 15.56 | 6.06E-02 | -36.87 | 58.64 | 5.29E-01 |
| cg02861733 | 11.09  | 4.59  | 1.56E-02 | 17.92  | 10.80 | 9.70E-02 | -10.92  | 28.04  | 6.97E-01 | 10.28  | 5.36  | 5.49E-02 | 10.23  | 18.79 | 5.86E-01 |
| cg15742700 | -11.15 | 4.61  | 1.56E-02 | -11.75 | 7.72  | 1.28E-01 | -17.44  | 14.31  | 2.23E-01 | -10.78 | 7.55  | 1.54E-01 | -6.79  | 11.27 | 5.47E-01 |
| cg21446000 | -8.95  | 3.70  | 1.56E-02 | -9.04  | 7.17  | 2.07E-01 | -2.39   | 9.43   | 8.00E-01 | -10.32 | 5.55  | 6.28E-02 | -11.79 | 10.13 | 2.45E-01 |
| cg11418595 | 15.63  | 6.46  | 1.56E-02 | 15.90  | 7.52  | 3.45E-02 | 1.47    | 13.84  | 9.16E-01 | 45.93  | 18.32 | 1.22E-02 | 12.22  | 10.67 | 2.52E-01 |
| cg19223622 | 37.37  | 15.46 | 1.56E-02 | 59.56  | 38.83 | 1.25E-01 | -195.24 | 176.80 | 2.69E-01 | 31.64  | 17.93 | 7.76E-02 | 65.31  | 51.40 | 2.04E-01 |
| cg01203331 | 30.81  | 12.74 | 1.56E-02 | 31.22  | 20.63 | 1.30E-01 | 35.65   | 25.32  | 1.59E-01 | 2.45   | 21.63 | 9.10E-01 | 67.96  | 27.78 | 1.44E-02 |
| cg07269819 | 16.34  | 6.76  | 1.56E-02 | 16.22  | 15.88 | 3.07E-01 | 10.81   | 16.43  | 5.11E-01 | 18.40  | 8.80  | 3.64E-02 | 11.99  | 27.79 | 6.66E-01 |
| cg05642546 | 6.32   | 2.61  | 1.56E-02 | 6.60   | 3.42  | 5.35E-02 | 13.05   | 7.01   | 6.27E-02 | 7.16   | 7.34  | 3.29E-01 | -1.74  | 6.76  | 7.97E-01 |
| cg24933919 | 5.54   | 2.29  | 1.56E-02 | 7.14   | 3.41  | 3.63E-02 | 7.33    | 5.38   | 1.72E-01 | 4.12   | 4.52  | 3.62E-01 | -0.63  | 6.87  | 9.27E-01 |

|              |        |       |          |        |       |          |         |        |          |        |       |          |        |       |          |
|--------------|--------|-------|----------|--------|-------|----------|---------|--------|----------|--------|-------|----------|--------|-------|----------|
| cg09472600   | 9.04   | 3.74  | 1.56E-02 | 10.56  | 5.28  | 4.57E-02 | 14.20   | 8.60   | 9.89E-02 | 12.45  | 10.91 | 2.54E-01 | -2.01  | 8.50  | 8.13E-01 |
| cg25216662   | 17.16  | 7.10  | 1.56E-02 | 5.18   | 19.87 | 7.94E-01 | 7.89    | 26.17  | 7.63E-01 | 20.28  | 8.24  | 1.39E-02 | 15.37  | 29.61 | 6.04E-01 |
| cg09886755   | 27.22  | 11.26 | 1.56E-02 | 29.60  | 12.81 | 2.08E-02 | 44.64   | 54.04  | 4.09E-01 | 68.10  | 69.45 | 3.27E-01 | 3.85   | 28.41 | 8.92E-01 |
| cg16922763   | -7.14  | 2.95  | 1.56E-02 | -5.83  | 4.23  | 1.68E-01 | -8.59   | 6.34   | 1.76E-01 | 1.12   | 8.54  | 8.96E-01 | -14.55 | 7.02  | 3.83E-02 |
| cg00557947   | 16.70  | 6.91  | 1.56E-02 | 9.97   | 23.80 | 6.75E-01 | 15.30   | 54.90  | 7.80E-01 | 19.92  | 7.95  | 1.22E-02 | 4.01   | 18.11 | 8.25E-01 |
| cg19216994   | -16.26 | 6.73  | 1.56E-02 | -27.81 | 11.26 | 1.35E-02 | -4.24   | 13.29  | 7.49E-01 | -0.99  | 15.55 | 9.49E-01 | -23.84 | 13.31 | 7.32E-02 |
| cg02825373   | 24.51  | 10.14 | 1.56E-02 | 33.81  | 15.60 | 3.02E-02 | -6.32   | 29.22  | 8.29E-01 | 30.41  | 32.78 | 3.54E-01 | 22.35  | 16.88 | 1.86E-01 |
| cg14713139   | 12.48  | 5.16  | 1.57E-02 | 13.69  | 7.93  | 8.42E-02 | 11.77   | 12.97  | 3.64E-01 | 19.07  | 11.39 | 9.39E-02 | 4.18   | 11.21 | 7.09E-01 |
| cg18563812   | -9.92  | 4.11  | 1.57E-02 | -6.88  | 6.73  | 3.07E-01 | -7.90   | 28.79  | 7.84E-01 | -14.88 | 6.46  | 2.12E-02 | -5.85  | 9.09  | 5.20E-01 |
| cg12379046   | 17.11  | 7.08  | 1.57E-02 | 35.54  | 20.43 | 8.19E-02 | 39.20   | 33.81  | 2.46E-01 | 12.25  | 8.02  | 1.26E-01 | 27.82  | 29.79 | 3.50E-01 |
| cg10896616   | 16.59  | 6.86  | 1.57E-02 | 11.19  | 13.44 | 4.05E-01 | -12.95  | 64.75  | 8.41E-01 | 17.51  | 8.51  | 3.97E-02 | 31.17  | 24.54 | 2.04E-01 |
| ch.3.151587F | -50.71 | 20.98 | 1.57E-02 | -63.48 | 28.76 | 2.73E-02 | -21.80  | 71.91  | 7.62E-01 | -69.09 | 70.04 | 3.24E-01 | -30.29 | 38.78 | 4.35E-01 |
| cg25252977   | 6.84   | 2.83  | 1.57E-02 | 8.97   | 3.85  | 1.99E-02 | 7.88    | 6.12   | 1.98E-01 | -0.34  | 7.42  | 9.64E-01 | 3.61   | 8.94  | 6.86E-01 |
| cg10508127   | 32.97  | 13.64 | 1.57E-02 | 34.24  | 18.39 | 6.26E-02 | 70.10   | 48.46  | 1.48E-01 | 58.65  | 35.59 | 9.94E-02 | -0.23  | 28.86 | 9.94E-01 |
| cg26986928   | -10.70 | 4.43  | 1.57E-02 | -14.08 | 6.67  | 3.46E-02 | -8.67   | 12.64  | 4.93E-01 | -5.43  | 8.90  | 5.42E-01 | -11.02 | 10.18 | 2.79E-01 |
| cg02866639   | 6.50   | 2.69  | 1.57E-02 | 2.36   | 3.35  | 4.80E-01 | 3.98    | 5.58   | 4.75E-01 | 11.71  | 6.01  | 5.12E-02 | 12.47  | 5.17  | 1.58E-02 |
| cg05627561   | 18.22  | 7.54  | 1.57E-02 | 31.02  | 19.89 | 1.19E-01 | 21.74   | 24.36  | 3.72E-01 | 19.31  | 9.11  | 3.41E-02 | -20.56 | 27.47 | 4.54E-01 |
| cg02507501   | -13.92 | 5.76  | 1.57E-02 | -25.20 | 8.80  | 4.20E-03 | 3.58    | 12.34  | 7.72E-01 | -12.02 | 8.00  | 1.33E-01 | -16.59 | 15.08 | 2.71E-01 |
| cg21012061   | 14.25  | 5.90  | 1.57E-02 | 12.60  | 8.52  | 1.39E-01 | 18.70   | 13.20  | 1.57E-01 | 7.67   | 14.10 | 5.86E-01 | 21.43  | 15.41 | 1.64E-01 |
| cg13341470   | -18.80 | 7.78  | 1.57E-02 | -25.16 | 13.43 | 6.10E-02 | -12.67  | 15.37  | 4.10E-01 | -19.03 | 16.81 | 2.58E-01 | -15.64 | 17.69 | 3.77E-01 |
| cg16708495   | 16.53  | 6.84  | 1.57E-02 | 0.21   | 19.08 | 9.91E-01 | 13.76   | 18.09  | 4.47E-01 | 18.25  | 8.36  | 2.90E-02 | 39.50  | 28.29 | 1.63E-01 |
| cg09568061   | -58.31 | 24.13 | 1.57E-02 | -55.40 | 27.69 | 4.54E-02 | -131.46 | 102.18 | 1.98E-01 | 55.39  | 77.49 | 4.75E-01 | -92.25 | 46.32 | 4.64E-02 |
| cg25080501   | -10.87 | 4.50  | 1.57E-02 | -10.56 | 9.57  | 2.70E-01 | -14.34  | 19.54  | 4.63E-01 | -12.60 | 5.69  | 2.68E-02 | 1.11   | 14.26 | 9.38E-01 |
| cg15348679   | -12.69 | 5.25  | 1.57E-02 | -12.81 | 7.61  | 9.22E-02 | -12.33  | 11.32  | 2.76E-01 | -24.24 | 15.66 | 1.22E-01 | -6.15  | 11.87 | 6.04E-01 |
| cg24029640   | -13.55 | 5.61  | 1.57E-02 | -18.06 | 9.24  | 5.07E-02 | -10.11  | 17.08  | 5.54E-01 | -7.47  | 8.71  | 3.91E-01 | -24.85 | 16.97 | 1.43E-01 |
| cg10604550   | 13.93  | 5.77  | 1.57E-02 | 18.30  | 8.36  | 2.86E-02 | 3.24    | 13.15  | 8.05E-01 | 11.34  | 13.98 | 4.17E-01 | 16.52  | 14.34 | 2.49E-01 |
| cg08927145   | -6.66  | 2.76  | 1.57E-02 | -6.09  | 3.89  | 1.17E-01 | -10.71  | 5.82   | 6.57E-02 | 6.98   | 13.11 | 5.94E-01 | -6.59  | 5.78  | 2.54E-01 |
| cg12112556   | 25.94  | 10.74 | 1.57E-02 | 10.41  | 18.62 | 5.76E-01 | 31.17   | 24.78  | 2.08E-01 | 40.59  | 18.73 | 3.02E-02 | 21.76  | 27.66 | 4.32E-01 |
| cg18276112   | 6.07   | 2.51  | 1.57E-02 | 5.17   | 3.23  | 1.10E-01 | 14.47   | 6.09   | 1.75E-02 | 6.37   | 8.71  | 4.65E-01 | -0.34  | 6.68  | 9.60E-01 |
| cg02338538   | 23.38  | 9.68  | 1.57E-02 | 34.83  | 21.24 | 1.01E-01 | 6.71    | 52.44  | 8.98E-01 | 20.78  | 12.04 | 8.44E-02 | 22.17  | 28.82 | 4.42E-01 |
| cg14865393   | 39.91  | 16.52 | 1.57E-02 | 55.92  | 23.18 | 1.58E-02 | 57.76   | 55.80  | 3.01E-01 | 9.07   | 59.40 | 8.79E-01 | 17.53  | 28.90 | 5.44E-01 |
| cg16711522   | -6.46  | 2.68  | 1.57E-02 | -4.47  | 3.68  | 2.25E-01 | -10.60  | 5.10   | 3.76E-02 | 0.49   | 11.87 | 9.67E-01 | -8.31  | 7.01  | 2.36E-01 |
| cg17049032   | 40.20  | 16.64 | 1.57E-02 | 13.85  | 44.09 | 7.53E-01 | -38.60  | 182.94 | 8.33E-01 | 51.65  | 19.33 | 7.53E-03 | 2.23   | 50.74 | 9.65E-01 |
| cg00549706   | 22.07  | 9.14  | 1.57E-02 | 19.34  | 15.90 | 2.24E-01 | 31.55   | 17.72  | 7.50E-02 | 17.81  | 17.90 | 3.20E-01 | 18.55  | 24.18 | 4.43E-01 |
| cg26549552   | -62.39 | 25.83 | 1.57E-02 | -42.78 | 48.17 | 3.75E-01 | -273.18 | 296.21 | 3.56E-01 | -75.56 | 35.02 | 3.10E-02 | -42.95 | 64.40 | 5.05E-01 |

|            |        |       |          |        |       |          |        |        |          |        |       |          |        |       |          |
|------------|--------|-------|----------|--------|-------|----------|--------|--------|----------|--------|-------|----------|--------|-------|----------|
| cg03547606 | 31.30  | 12.96 | 1.57E-02 | 32.68  | 17.06 | 5.54E-02 | -34.85 | 55.09  | 5.27E-01 | 53.85  | 57.30 | 3.47E-01 | 36.70  | 23.04 | 1.11E-01 |
| cg19670885 | -14.61 | 6.05  | 1.57E-02 | -30.28 | 14.85 | 4.15E-02 | -33.45 | 32.70  | 3.06E-01 | -10.64 | 7.09  | 1.33E-01 | -9.68  | 22.73 | 6.70E-01 |
| cg23815646 | -7.61  | 3.15  | 1.57E-02 | -9.23  | 4.52  | 4.13E-02 | -6.22  | 6.85   | 3.64E-01 | 15.14  | 14.00 | 2.79E-01 | -10.23 | 6.27  | 1.03E-01 |
| cg04362887 | 7.74   | 3.21  | 1.57E-02 | 8.29   | 4.14  | 4.53E-02 | 13.77  | 7.60   | 7.00E-02 | -0.13  | 10.33 | 9.90E-01 | 2.66   | 9.01  | 7.68E-01 |
| cg16421621 | 18.64  | 7.72  | 1.57E-02 | 31.05  | 19.05 | 1.03E-01 | 35.74  | 27.85  | 1.99E-01 | 14.70  | 9.29  | 1.14E-01 | 9.45   | 29.39 | 7.48E-01 |
| cg27581644 | -23.57 | 9.76  | 1.57E-02 | -0.74  | 21.95 | 9.73E-01 | -13.45 | 53.42  | 8.01E-01 | -32.03 | 11.96 | 7.40E-03 | -15.96 | 30.50 | 6.01E-01 |
| cg02860602 | 19.88  | 8.23  | 1.57E-02 | 15.10  | 13.15 | 2.51E-01 | 24.06  | 21.54  | 2.64E-01 | 29.58  | 19.99 | 1.39E-01 | 18.56  | 15.22 | 2.23E-01 |
| cg27357134 | -10.81 | 4.48  | 1.57E-02 | -18.74 | 11.47 | 1.02E-01 | 0.02   | 15.45  | 9.99E-01 | -11.96 | 5.45  | 2.81E-02 | 1.37   | 15.04 | 9.28E-01 |
| cg04003047 | -18.45 | 7.64  | 1.57E-02 | -15.53 | 16.45 | 3.45E-01 | 110.97 | 184.57 | 5.48E-01 | -30.66 | 24.22 | 2.06E-01 | -17.91 | 9.24  | 5.26E-02 |
| cg04789529 | 8.47   | 3.51  | 1.57E-02 | 9.40   | 4.60  | 4.10E-02 | 12.94  | 9.87   | 1.90E-01 | 7.85   | 8.56  | 3.59E-01 | 0.42   | 9.93  | 9.67E-01 |
| cg20164068 | -22.67 | 9.39  | 1.58E-02 | -23.44 | 12.34 | 5.74E-02 | 8.48   | 29.12  | 7.71E-01 | -39.99 | 28.59 | 1.62E-01 | -27.11 | 20.54 | 1.87E-01 |
| cg05132283 | 33.51  | 13.88 | 1.58E-02 | 35.35  | 26.05 | 1.75E-01 | 121.13 | 109.01 | 2.66E-01 | 29.29  | 18.51 | 1.14E-01 | 36.59  | 37.35 | 3.27E-01 |
| cg23844013 | -13.82 | 5.72  | 1.58E-02 | -21.90 | 13.96 | 1.17E-01 | -13.68 | 23.11  | 5.54E-01 | -11.98 | 6.93  | 8.37E-02 | -12.71 | 19.30 | 5.10E-01 |
| cg13406908 | 28.91  | 11.97 | 1.58E-02 | 52.26  | 19.77 | 8.21E-03 | -98.71 | 88.77  | 2.66E-01 | 24.47  | 10.40 | 1.87E-02 | 17.03  | 32.08 | 5.95E-01 |
| cg19183842 | 9.69   | 4.01  | 1.58E-02 | 8.91   | 5.40  | 9.88E-02 | 5.09   | 10.37  | 6.24E-01 | 20.80  | 14.95 | 1.64E-01 | 11.07  | 8.43  | 1.89E-01 |
| cg05108031 | 30.84  | 12.77 | 1.58E-02 | 30.22  | 18.76 | 1.07E-01 | 35.17  | 51.71  | 4.96E-01 | 63.10  | 41.19 | 1.26E-01 | 22.72  | 20.74 | 2.73E-01 |
| cg15664905 | 12.47  | 5.17  | 1.58E-02 | 16.25  | 7.58  | 3.21E-02 | 17.85  | 11.38  | 1.17E-01 | 8.54   | 12.39 | 4.91E-01 | -1.52  | 13.10 | 9.08E-01 |
| cg04857172 | -18.42 | 7.63  | 1.58E-02 | -30.74 | 13.27 | 2.05E-02 | -25.68 | 16.32  | 1.16E-01 | 4.65   | 16.54 | 7.79E-01 | -15.54 | 15.19 | 3.06E-01 |
| cg01775612 | 11.20  | 4.64  | 1.58E-02 | 10.01  | 7.57  | 1.86E-01 | 13.70  | 9.13   | 1.33E-01 | 15.60  | 10.89 | 1.52E-01 | 5.78   | 10.80 | 5.92E-01 |
| cg24534258 | -20.28 | 8.40  | 1.58E-02 | -20.79 | 12.16 | 8.73E-02 | -36.52 | 22.15  | 9.92E-02 | -5.64  | 7.69  | 4.63E-01 | -38.34 | 14.60 | 8.66E-03 |
| cg26673264 | 14.71  | 6.09  | 1.58E-02 | 4.97   | 13.90 | 7.21E-01 | 10.14  | 35.92  | 7.78E-01 | 15.94  | 7.29  | 2.88E-02 | 28.80  | 21.39 | 1.78E-01 |
| cg02643667 | -22.03 | 9.12  | 1.58E-02 | -17.97 | 24.15 | 4.57E-01 | 8.29   | 37.52  | 8.25E-01 | -27.46 | 10.71 | 1.04E-02 | -0.47  | 33.78 | 9.89E-01 |
| cg27474175 | 9.11   | 3.78  | 1.58E-02 | 9.25   | 6.84  | 1.76E-01 | 1.46   | 7.63   | 8.49E-01 | 10.95  | 6.40  | 8.70E-02 | 20.90  | 11.85 | 7.77E-02 |
| cg03445404 | 34.53  | 14.30 | 1.58E-02 | 38.59  | 18.32 | 3.52E-02 | 4.48   | 53.84  | 9.34E-01 | 9.29   | 40.66 | 8.19E-01 | 48.65  | 32.31 | 1.32E-01 |
| cg13439730 | 15.71  | 6.51  | 1.58E-02 | 15.26  | 15.02 | 3.10E-01 | -7.47  | 16.86  | 6.58E-01 | 23.19  | 7.91  | 3.37E-03 | 2.08   | 23.44 | 9.29E-01 |
| cg09152120 | 12.90  | 5.34  | 1.58E-02 | 19.40  | 13.20 | 1.42E-01 | 14.30  | 13.27  | 2.81E-01 | 10.36  | 6.96  | 1.37E-01 | 15.30  | 18.37 | 4.05E-01 |
| cg05458764 | 20.12  | 8.34  | 1.58E-02 | 16.17  | 16.90 | 3.39E-01 | 39.14  | 17.64  | 2.65E-02 | 15.06  | 13.35 | 2.59E-01 | 10.99  | 21.99 | 6.17E-01 |
| cg07103895 | 19.23  | 7.97  | 1.58E-02 | 20.45  | 19.23 | 2.88E-01 | -13.08 | 21.17  | 5.37E-01 | 27.00  | 10.45 | 9.78E-03 | 17.87  | 24.58 | 4.67E-01 |
| cg21203569 | 7.89   | 3.27  | 1.58E-02 | 6.35   | 4.79  | 1.85E-01 | 12.15  | 7.38   | 9.95E-02 | 15.42  | 8.72  | 7.69E-02 | 1.94   | 7.36  | 7.92E-01 |
| cg14069333 | -9.96  | 4.13  | 1.58E-02 | -5.47  | 11.89 | 6.45E-01 | -1.18  | 19.55  | 9.52E-01 | -10.22 | 4.75  | 3.15E-02 | -19.09 | 14.52 | 1.89E-01 |
| cg13265003 | 8.23   | 3.41  | 1.58E-02 | 6.72   | 4.32  | 1.20E-01 | 19.61  | 8.85   | 2.68E-02 | 7.98   | 10.70 | 4.56E-01 | 2.60   | 9.49  | 7.84E-01 |
| cg20336981 | 20.07  | 8.31  | 1.58E-02 | 35.66  | 12.62 | 4.70E-03 | -9.14  | 21.18  | 6.66E-01 | 16.54  | 18.87 | 3.81E-01 | 18.06  | 12.92 | 1.62E-01 |
| cg06842409 | -5.64  | 2.34  | 1.58E-02 | -5.88  | 3.24  | 6.94E-02 | -7.65  | 5.30   | 1.48E-01 | -4.60  | 9.12  | 6.14E-01 | -3.59  | 5.00  | 4.73E-01 |
| cg00480161 | 31.89  | 13.21 | 1.58E-02 | 27.68  | 17.27 | 1.09E-01 | 66.26  | 44.47  | 1.36E-01 | 9.48   | 36.80 | 7.97E-01 | 43.58  | 29.70 | 1.42E-01 |
| cg12259256 | -33.84 | 14.02 | 1.58E-02 | -35.59 | 15.56 | 2.22E-02 | -59.43 | 71.19  | 4.04E-01 | -84.00 | 78.87 | 2.87E-01 | 0.10   | 40.84 | 9.98E-01 |



|            |        |       |          |        |       |          |        |        |          |        |       |          |        |       |          |
|------------|--------|-------|----------|--------|-------|----------|--------|--------|----------|--------|-------|----------|--------|-------|----------|
| cg02169201 | 23.02  | 9.54  | 1.58E-02 | 29.09  | 17.76 | 1.01E-01 | 19.17  | 18.77  | 3.07E-01 | 12.54  | 16.90 | 4.58E-01 | 42.16  | 25.98 | 1.05E-01 |
| cg00572843 | 14.74  | 6.11  | 1.58E-02 | 17.06  | 8.04  | 3.38E-02 | 21.55  | 16.08  | 1.80E-01 | -18.17 | 22.03 | 4.09E-01 | 15.78  | 13.60 | 2.46E-01 |
| cg07108754 | 12.48  | 5.17  | 1.58E-02 | 15.46  | 8.08  | 5.57E-02 | 23.54  | 14.89  | 1.14E-01 | 14.49  | 7.37  | 4.93E-02 | -8.68  | 13.06 | 5.07E-01 |
| cg05966983 | 36.08  | 14.95 | 1.58E-02 | 32.16  | 42.53 | 4.50E-01 | -18.58 | 169.06 | 9.13E-01 | 40.53  | 16.88 | 1.63E-02 | 5.43   | 51.52 | 9.16E-01 |
| cg22158462 | -11.81 | 4.89  | 1.58E-02 | -26.68 | 12.06 | 2.70E-02 | 3.04   | 18.57  | 8.70E-01 | -10.62 | 6.06  | 7.97E-02 | -6.18  | 14.48 | 6.70E-01 |
| cg13628022 | -9.60  | 3.98  | 1.58E-02 | -8.84  | 5.55  | 1.11E-01 | -12.28 | 7.93   | 1.21E-01 | -32.01 | 17.74 | 7.12E-02 | -1.95  | 9.25  | 8.33E-01 |
| cg01076861 | -9.68  | 4.01  | 1.58E-02 | -15.70 | 7.08  | 2.66E-02 | -10.53 | 16.79  | 5.30E-01 | -7.07  | 5.69  | 2.14E-01 | -4.21  | 11.36 | 7.11E-01 |
| cg23001000 | 54.42  | 22.55 | 1.58E-02 | 66.57  | 48.82 | 1.73E-01 | 6.62   | 215.75 | 9.76E-01 | 54.39  | 27.62 | 4.89E-02 | 35.51  | 68.33 | 6.03E-01 |
| cg09073106 | -36.56 | 15.15 | 1.58E-02 | -9.52  | 52.06 | 8.55E-01 | -81.42 | 206.68 | 6.94E-01 | -42.95 | 16.53 | 9.38E-03 | 10.87  | 57.26 | 8.49E-01 |
| cg04080448 | 7.84   | 3.25  | 1.58E-02 | 12.03  | 4.95  | 1.50E-02 | 9.77   | 7.76   | 2.08E-01 | 5.82   | 8.21  | 4.78E-01 | 0.10   | 6.67  | 9.89E-01 |
| cg22544571 | -16.82 | 6.97  | 1.58E-02 | -34.73 | 8.45  | 3.95E-05 | -13.33 | 11.08  | 2.29E-01 | -7.79  | 7.75  | 3.15E-01 | -9.11  | 11.74 | 4.38E-01 |
| cg13978856 | -13.58 | 5.63  | 1.58E-02 | -20.86 | 10.02 | 3.74E-02 | -8.06  | 13.65  | 5.55E-01 | -10.11 | 10.24 | 3.23E-01 | -12.12 | 12.24 | 3.22E-01 |
| cg09874127 | -43.11 | 17.87 | 1.58E-02 | -30.89 | 21.66 | 1.54E-01 | -79.92 | 67.79  | 2.38E-01 | 11.20  | 80.64 | 8.90E-01 | -85.12 | 39.90 | 3.29E-02 |
| cg06099244 | -15.53 | 6.44  | 1.58E-02 | -18.04 | 12.33 | 1.43E-01 | -5.40  | 18.01  | 7.65E-01 | -19.97 | 9.18  | 2.96E-02 | -0.98  | 19.56 | 9.60E-01 |
| cg04451353 | 11.35  | 4.70  | 1.58E-02 | 15.21  | 10.11 | 1.33E-01 | 26.02  | 12.33  | 3.49E-02 | 7.04   | 6.37  | 2.69E-01 | 4.69   | 15.43 | 7.61E-01 |
| cg23662331 | -10.61 | 4.40  | 1.59E-02 | -4.87  | 7.11  | 4.93E-01 | -19.80 | 9.87   | 4.49E-02 | -12.89 | 10.19 | 2.06E-01 | -10.37 | 9.11  | 2.55E-01 |
| cg22299454 | 15.44  | 6.40  | 1.59E-02 | 36.82  | 21.16 | 8.19E-02 | 16.69  | 65.26  | 7.98E-01 | 15.18  | 7.13  | 3.31E-02 | -3.65  | 21.09 | 8.63E-01 |
| cg17216737 | 16.58  | 6.87  | 1.59E-02 | 11.49  | 10.16 | 2.58E-01 | 27.22  | 13.45  | 4.29E-02 | 20.48  | 20.08 | 3.08E-01 | 11.05  | 16.96 | 5.15E-01 |
| cg07586193 | 17.15  | 7.11  | 1.59E-02 | 7.28   | 16.19 | 6.53E-01 | -20.70 | 70.23  | 7.68E-01 | 21.15  | 8.31  | 1.09E-02 | 7.43   | 27.84 | 7.90E-01 |
| cg13764106 | 23.62  | 9.79  | 1.59E-02 | -9.35  | 28.33 | 7.41E-01 | 18.39  | 92.82  | 8.43E-01 | 31.83  | 11.05 | 3.96E-03 | -5.67  | 33.83 | 8.67E-01 |
| cg17471779 | -29.64 | 12.29 | 1.59E-02 | -30.13 | 15.50 | 5.19E-02 | -38.03 | 30.64  | 2.15E-01 | -57.72 | 53.41 | 2.80E-01 | -9.75  | 30.93 | 7.53E-01 |
| cg26815291 | 18.08  | 7.49  | 1.59E-02 | 16.82  | 23.46 | 4.73E-01 | 3.25   | 74.52  | 9.65E-01 | 19.38  | 8.26  | 1.90E-02 | 5.93   | 29.35 | 8.40E-01 |
| cg23648239 | 5.34   | 2.21  | 1.59E-02 | 3.62   | 3.10  | 2.43E-01 | 11.54  | 5.85   | 4.86E-02 | 7.70   | 4.62  | 9.57E-02 | 0.62   | 6.48  | 9.23E-01 |
| cg25649765 | -9.14  | 3.79  | 1.59E-02 | -13.37 | 5.98  | 2.54E-02 | -2.19  | 8.50   | 7.96E-01 | -4.67  | 8.44  | 5.80E-01 | -12.09 | 8.51  | 1.55E-01 |
| cg00681365 | -12.01 | 4.98  | 1.59E-02 | -14.01 | 13.42 | 2.96E-01 | 3.68   | 23.99  | 8.78E-01 | -11.95 | 5.87  | 4.19E-02 | -16.47 | 15.73 | 2.95E-01 |
| cg14207539 | -15.06 | 6.25  | 1.59E-02 | -10.41 | 16.73 | 5.34E-01 | -0.27  | 27.97  | 9.92E-01 | -16.16 | 7.18  | 2.45E-02 | -25.18 | 26.61 | 3.44E-01 |
| cg10514113 | 17.12  | 7.10  | 1.59E-02 | 19.13  | 16.19 | 2.37E-01 | 36.82  | 25.40  | 1.47E-01 | 18.45  | 7.96  | 2.04E-02 | -27.07 | 28.10 | 3.35E-01 |
| cg19570574 | 28.50  | 11.82 | 1.59E-02 | 36.30  | 16.39 | 2.68E-02 | -0.78  | 34.71  | 9.82E-01 | 31.42  | 27.46 | 2.53E-01 | 21.80  | 27.90 | 4.35E-01 |
| cg22968936 | 20.16  | 8.36  | 1.59E-02 | 42.89  | 23.64 | 6.96E-02 | 9.59   | 65.83  | 8.84E-01 | 22.94  | 9.77  | 1.89E-02 | -9.73  | 21.17 | 6.46E-01 |
| cg25764120 | -10.23 | 4.24  | 1.59E-02 | -10.82 | 9.08  | 2.33E-01 | -8.15  | 16.95  | 6.31E-01 | -9.76  | 5.56  | 7.91E-02 | -12.28 | 11.51 | 2.86E-01 |
| cg11367973 | 12.34  | 5.12  | 1.59E-02 | 8.55   | 6.81  | 2.09E-01 | 30.25  | 10.87  | 5.38E-03 | 6.06   | 10.74 | 5.73E-01 | 8.63   | 11.71 | 4.61E-01 |
| cg18351858 | 14.39  | 5.97  | 1.59E-02 | 12.98  | 8.15  | 1.11E-01 | 19.48  | 19.60  | 3.20E-01 | 20.49  | 15.85 | 1.96E-01 | 11.86  | 12.45 | 3.41E-01 |
| cg01101873 | 9.76   | 4.05  | 1.59E-02 | 9.81   | 4.75  | 3.90E-02 | 18.38  | 8.67   | 3.41E-02 | 14.42  | 9.00  | 1.09E-01 | -4.23  | 9.00  | 6.39E-01 |
| cg13506158 | -15.88 | 6.58  | 1.59E-02 | -19.60 | 13.15 | 1.36E-01 | -16.41 | 18.28  | 3.69E-01 | -15.24 | 9.52  | 1.09E-01 | -10.92 | 17.52 | 5.33E-01 |
| cg03258665 | 11.31  | 4.69  | 1.59E-02 | 12.62  | 6.28  | 4.43E-02 | 5.56   | 10.32  | 5.90E-01 | 2.32   | 16.65 | 8.89E-01 | 18.88  | 11.93 | 1.13E-01 |

|            |        |       |          |        |       |          |         |        |          |         |       |          |        |       |          |
|------------|--------|-------|----------|--------|-------|----------|---------|--------|----------|---------|-------|----------|--------|-------|----------|
| cg17680767 | -13.56 | 5.62  | 1.59E-02 | -9.00  | 8.01  | 2.61E-01 | -15.48  | 12.06  | 1.99E-01 | -0.64   | 21.92 | 9.77E-01 | -25.56 | 11.90 | 3.17E-02 |
| cg20334115 | 8.13   | 3.37  | 1.59E-02 | 7.96   | 4.36  | 6.83E-02 | 11.43   | 9.41   | 2.24E-01 | 3.66    | 9.77  | 7.08E-01 | 9.46   | 8.53  | 2.67E-01 |
| cg19985056 | 4.30   | 1.78  | 1.59E-02 | 6.41   | 3.22  | 4.65E-02 | 6.14    | 5.44   | 2.59E-01 | 3.41    | 2.78  | 2.20E-01 | 1.54   | 4.29  | 7.19E-01 |
| cg11074070 | -14.71 | 6.10  | 1.59E-02 | -5.12  | 16.59 | 7.57E-01 | -12.44  | 23.98  | 6.04E-01 | -14.78  | 7.09  | 3.70E-02 | -38.19 | 25.10 | 1.28E-01 |
| cg06418871 | 8.05   | 3.34  | 1.59E-02 | 14.52  | 6.95  | 3.67E-02 | 9.73    | 6.63   | 1.42E-01 | 3.95    | 6.76  | 5.59E-01 | 4.67   | 6.42  | 4.67E-01 |
| cg17828057 | -6.28  | 2.60  | 1.59E-02 | -7.73  | 3.52  | 2.80E-02 | 0.73    | 5.96   | 9.03E-01 | -8.52   | 7.16  | 2.34E-01 | -8.16  | 7.24  | 2.60E-01 |
| cg12208258 | 16.64  | 6.90  | 1.59E-02 | -28.24 | 28.37 | 3.19E-01 | 24.52   | 44.16  | 5.79E-01 | 20.68   | 6.86  | 2.56E-03 | 6.62   | 22.66 | 7.70E-01 |
| cg22280682 | 22.87  | 9.49  | 1.59E-02 | 14.50  | 19.36 | 4.54E-01 | 28.15   | 18.70  | 1.32E-01 | 21.13   | 15.48 | 1.72E-01 | 33.19  | 26.69 | 2.14E-01 |
| cg00618626 | 32.38  | 13.43 | 1.59E-02 | 40.93  | 21.16 | 5.30E-02 | 53.93   | 28.82  | 6.13E-02 | 8.06    | 31.09 | 7.95E-01 | 13.78  | 30.59 | 6.52E-01 |
| cg24916020 | 32.16  | 13.34 | 1.59E-02 | 36.61  | 18.47 | 4.75E-02 | 23.47   | 34.00  | 4.90E-01 | -16.39  | 41.93 | 6.96E-01 | 49.79  | 28.26 | 7.81E-02 |
| cg17231999 | 14.18  | 5.89  | 1.59E-02 | 21.92  | 17.45 | 2.09E-01 | 11.54   | 31.66  | 7.15E-01 | 10.81   | 7.10  | 1.28E-01 | 23.48  | 14.52 | 1.06E-01 |
| cg01172345 | -15.89 | 6.59  | 1.59E-02 | -29.04 | 11.92 | 1.49E-02 | -15.24  | 16.84  | 3.65E-01 | -14.58  | 7.95  | 6.69E-02 | 16.81  | 22.38 | 4.53E-01 |
| cg15479752 | 18.88  | 7.83  | 1.59E-02 | 49.58  | 20.63 | 1.62E-02 | 8.22    | 25.10  | 7.43E-01 | 13.63   | 9.45  | 1.49E-01 | 21.90  | 29.31 | 4.55E-01 |
| cg06048662 | -29.37 | 12.19 | 1.59E-02 | -34.14 | 18.59 | 6.63E-02 | -23.88  | 23.88  | 3.17E-01 | -34.39  | 27.06 | 2.04E-01 | -14.04 | 37.30 | 7.07E-01 |
| cg09637172 | -9.43  | 3.91  | 1.59E-02 | -9.04  | 5.80  | 1.19E-01 | -11.27  | 11.54  | 3.29E-01 | -11.98  | 10.06 | 2.33E-01 | -7.92  | 7.39  | 2.84E-01 |
| cg16182757 | 9.73   | 4.04  | 1.60E-02 | 9.87   | 5.40  | 6.78E-02 | 12.62   | 11.48  | 2.72E-01 | 14.00   | 10.00 | 1.61E-01 | 2.42   | 10.29 | 8.14E-01 |
| cg10313368 | -9.40  | 3.90  | 1.60E-02 | -7.28  | 7.77  | 3.48E-01 | 2.75    | 13.25  | 8.36E-01 | -12.00  | 5.35  | 2.49E-02 | -10.99 | 10.83 | 3.10E-01 |
| cg14042799 | 10.33  | 4.29  | 1.60E-02 | 14.54  | 6.00  | 1.53E-02 | -0.23   | 9.71   | 9.81E-01 | 8.59    | 15.14 | 5.71E-01 | 10.55  | 9.26  | 2.55E-01 |
| cg07546360 | 18.02  | 7.48  | 1.60E-02 | 25.72  | 20.94 | 2.19E-01 | 33.82   | 19.35  | 8.06E-02 | 11.85   | 9.30  | 2.03E-01 | 26.30  | 26.84 | 3.27E-01 |
| cg15393903 | -10.52 | 4.37  | 1.60E-02 | -15.00 | 10.81 | 1.65E-01 | -9.99   | 12.11  | 4.09E-01 | -8.17   | 5.48  | 1.36E-01 | -21.85 | 16.14 | 1.76E-01 |
| cg21109666 | -2.89  | 1.20  | 1.60E-02 | -1.74  | 1.73  | 3.15E-01 | -5.78   | 2.33   | 1.32E-02 | -3.30   | 3.22  | 3.05E-01 | -0.59  | 3.48  | 8.65E-01 |
| cg25943061 | -24.39 | 10.12 | 1.60E-02 | -36.92 | 24.09 | 1.25E-01 | -133.63 | 163.72 | 4.14E-01 | -19.93  | 11.65 | 8.70E-02 | -35.74 | 39.80 | 3.69E-01 |
| cg27012396 | 20.18  | 8.37  | 1.60E-02 | 18.30  | 16.79 | 2.76E-01 | 32.35   | 19.37  | 9.49E-02 | 12.27   | 12.63 | 3.31E-01 | 33.57  | 23.71 | 1.57E-01 |
| cg11390468 | 36.46  | 15.13 | 1.60E-02 | 45.35  | 19.05 | 1.73E-02 | 3.12    | 81.44  | 9.69E-01 | -22.00  | 52.46 | 6.75E-01 | 38.10  | 30.17 | 2.07E-01 |
| cg14296561 | 6.52   | 2.71  | 1.60E-02 | 4.27   | 3.56  | 2.31E-01 | 11.79   | 6.49   | 6.91E-02 | 12.49   | 8.13  | 1.25E-01 | 4.49   | 7.25  | 5.36E-01 |
| cg19902593 | -11.15 | 4.63  | 1.60E-02 | -19.91 | 9.80  | 4.22E-02 | -21.16  | 13.16  | 1.08E-01 | -6.16   | 6.50  | 3.43E-01 | -6.65  | 12.11 | 5.83E-01 |
| cg26177311 | -12.54 | 5.20  | 1.60E-02 | -17.27 | 12.99 | 1.84E-01 | -1.92   | 24.07  | 9.36E-01 | -11.71  | 6.31  | 6.32E-02 | -15.24 | 15.59 | 3.28E-01 |
| cg21376774 | 15.37  | 6.38  | 1.60E-02 | 20.46  | 10.98 | 6.24E-02 | 12.37   | 14.94  | 4.08E-01 | 22.38   | 13.36 | 9.40E-02 | 4.39   | 12.71 | 7.30E-01 |
| cg00561854 | -10.72 | 4.45  | 1.60E-02 | -6.36  | 14.71 | 6.66E-01 | -4.50   | 27.98  | 8.72E-01 | -12.75  | 4.89  | 9.17E-03 | 8.95   | 18.60 | 6.30E-01 |
| cg24641352 | 11.44  | 4.75  | 1.60E-02 | 9.70   | 7.70  | 2.08E-01 | 10.56   | 11.47  | 3.57E-01 | 6.57    | 10.03 | 5.12E-01 | 19.87  | 10.00 | 4.70E-02 |
| cg27573344 | -10.09 | 4.19  | 1.60E-02 | -12.23 | 7.22  | 9.02E-02 | -2.32   | 9.26   | 8.02E-01 | -4.87   | 8.68  | 5.75E-01 | -19.33 | 8.82  | 2.83E-02 |
| cg10758022 | -12.79 | 5.31  | 1.60E-02 | 3.75   | 13.78 | 7.85E-01 | -1.51   | 26.48  | 9.54E-01 | -16.58  | 6.23  | 7.74E-03 | -14.64 | 18.33 | 4.25E-01 |
| cg24707200 | -15.91 | 6.60  | 1.60E-02 | -11.17 | 9.85  | 2.56E-01 | -24.59  | 15.39  | 1.10E-01 | -15.00  | 15.44 | 3.31E-01 | -19.71 | 15.43 | 2.01E-01 |
| cg09555414 | -64.55 | 26.79 | 1.60E-02 | -65.00 | 36.12 | 7.19E-02 | 61.47   | 165.82 | 7.11E-01 | -162.10 | 75.82 | 3.25E-02 | -33.96 | 49.02 | 4.89E-01 |
| cg15431934 | 18.16  | 7.54  | 1.60E-02 | 15.00  | 9.85  | 1.28E-01 | 29.88   | 17.15  | 8.16E-02 | 5.87    | 34.05 | 8.63E-01 | 19.27  | 18.15 | 2.88E-01 |

|            |        |       |          |        |       |          |        |        |          |        |       |          |        |       |          |
|------------|--------|-------|----------|--------|-------|----------|--------|--------|----------|--------|-------|----------|--------|-------|----------|
| cg09175325 | 19.00  | 7.89  | 1.60E-02 | 9.40   | 11.92 | 4.30E-01 | 24.38  | 15.71  | 1.21E-01 | 26.71  | 18.54 | 1.50E-01 | 30.24  | 21.93 | 1.68E-01 |
| cg22782986 | 31.11  | 12.91 | 1.60E-02 | 27.13  | 17.09 | 1.13E-01 | 76.26  | 63.93  | 2.33E-01 | 44.86  | 41.62 | 2.81E-01 | 28.04  | 23.88 | 2.40E-01 |
| cg14310703 | 17.51  | 7.27  | 1.60E-02 | 12.94  | 15.60 | 4.07E-01 | 43.76  | 30.78  | 1.55E-01 | 14.92  | 9.43  | 1.14E-01 | 25.45  | 19.86 | 2.00E-01 |
| cg00824880 | 29.30  | 12.16 | 1.60E-02 | 24.87  | 27.82 | 3.71E-01 | -40.26 | 114.08 | 7.24E-01 | 39.93  | 14.90 | 7.36E-03 | -12.24 | 33.59 | 7.15E-01 |
| cg02725362 | 19.87  | 8.25  | 1.60E-02 | 35.17  | 17.23 | 4.13E-02 | 4.56   | 16.06  | 7.77E-01 | 14.88  | 13.27 | 2.62E-01 | 40.22  | 23.72 | 8.99E-02 |
| cg22851252 | 49.90  | 20.71 | 1.60E-02 | 39.22  | 26.23 | 1.35E-01 | 20.04  | 91.79  | 8.27E-01 | 58.50  | 63.53 | 3.57E-01 | 83.02  | 44.24 | 6.06E-02 |
| cg18258482 | -7.52  | 3.12  | 1.60E-02 | -7.29  | 6.24  | 2.43E-01 | -1.78  | 10.96  | 8.71E-01 | -9.57  | 4.18  | 2.19E-02 | -1.81  | 9.46  | 8.49E-01 |
| cg20949198 | -23.97 | 9.95  | 1.60E-02 | -27.21 | 19.95 | 1.73E-01 | 3.22   | 33.48  | 9.23E-01 | -25.35 | 13.36 | 5.78E-02 | -31.74 | 30.32 | 2.95E-01 |
| cg15896696 | 9.03   | 3.75  | 1.60E-02 | 10.53  | 5.57  | 5.90E-02 | 8.10   | 7.57   | 2.85E-01 | 12.49  | 10.82 | 2.48E-01 | 4.31   | 8.79  | 6.24E-01 |
| cg07419921 | -10.43 | 4.33  | 1.60E-02 | -10.97 | 10.07 | 2.76E-01 | -10.29 | 20.54  | 6.16E-01 | -9.86  | 5.36  | 6.61E-02 | -12.80 | 12.56 | 3.08E-01 |
| cg03231471 | -11.92 | 4.95  | 1.60E-02 | -17.91 | 8.01  | 2.54E-02 | -1.10  | 11.67  | 9.25E-01 | -7.74  | 10.53 | 4.62E-01 | -14.59 | 10.60 | 1.69E-01 |
| cg27420946 | -16.49 | 6.85  | 1.60E-02 | -23.34 | 22.42 | 2.98E-01 | -16.49 | 34.01  | 6.28E-01 | -15.42 | 7.62  | 4.29E-02 | -20.38 | 28.38 | 4.73E-01 |
| cg24706697 | 40.07  | 16.64 | 1.60E-02 | 57.70  | 39.84 | 1.47E-01 | -80.79 | 189.28 | 6.70E-01 | 38.13  | 19.57 | 5.14E-02 | 32.35  | 53.94 | 5.49E-01 |
| cg16122628 | -9.08  | 3.77  | 1.60E-02 | -9.72  | 7.06  | 1.69E-01 | 2.79   | 10.04  | 7.81E-01 | -12.68 | 5.43  | 1.96E-02 | -6.48  | 12.44 | 6.03E-01 |
| cg11367260 | -11.25 | 4.67  | 1.60E-02 | -9.48  | 7.16  | 1.85E-01 | -3.98  | 12.28  | 7.46E-01 | -10.15 | 10.16 | 3.18E-01 | -20.60 | 10.01 | 3.95E-02 |
| cg00899855 | 12.34  | 5.12  | 1.60E-02 | 14.74  | 9.13  | 1.06E-01 | 21.03  | 12.29  | 8.70E-02 | 8.98   | 8.07  | 2.66E-01 | 3.90   | 15.59 | 8.03E-01 |
| cg14372570 | 18.66  | 7.75  | 1.60E-02 | 25.16  | 20.33 | 2.16E-01 | 33.67  | 38.22  | 3.78E-01 | 15.36  | 8.97  | 8.67E-02 | 32.05  | 29.92 | 2.84E-01 |
| cg23705108 | -15.16 | 6.29  | 1.60E-02 | -15.68 | 12.64 | 2.15E-01 | -44.45 | 28.22  | 1.15E-01 | -15.64 | 8.42  | 6.31E-02 | -2.15  | 16.64 | 8.97E-01 |
| cg06846458 | 19.14  | 7.95  | 1.60E-02 | 41.94  | 20.43 | 4.01E-02 | 32.34  | 27.13  | 2.33E-01 | 10.58  | 8.41  | 2.08E-01 | 44.04  | 30.73 | 1.52E-01 |
| cg25569396 | 31.16  | 12.94 | 1.60E-02 | 36.20  | 15.30 | 1.80E-02 | 19.87  | 67.30  | 7.68E-01 | 45.32  | 51.68 | 3.81E-01 | 9.13   | 30.09 | 7.61E-01 |
| cg19637591 | -10.63 | 4.42  | 1.60E-02 | -21.80 | 8.19  | 7.80E-03 | -1.56  | 8.66   | 8.57E-01 | -10.43 | 6.93  | 1.32E-01 | -4.42  | 12.66 | 7.27E-01 |
| cg09185231 | -14.57 | 6.05  | 1.60E-02 | -11.26 | 18.68 | 5.47E-01 | -15.60 | 11.22  | 1.64E-01 | -11.61 | 8.08  | 1.51E-01 | -53.65 | 28.97 | 6.40E-02 |
| cg25520872 | 18.79  | 7.80  | 1.60E-02 | 25.59  | 20.06 | 2.02E-01 | 43.24  | 30.61  | 1.58E-01 | 7.59   | 10.05 | 4.50E-01 | 35.79  | 16.41 | 2.92E-02 |
| cg14784398 | -20.88 | 8.67  | 1.60E-02 | -31.96 | 29.05 | 2.71E-01 | -63.17 | 70.81  | 3.72E-01 | -22.04 | 9.47  | 2.00E-02 | 24.13  | 36.16 | 5.05E-01 |
| cg16549684 | -12.20 | 5.07  | 1.61E-02 | -12.39 | 10.45 | 2.36E-01 | -3.44  | 23.36  | 8.83E-01 | -11.92 | 6.61  | 7.15E-02 | -16.31 | 14.05 | 2.45E-01 |
| cg25657700 | 8.62   | 3.58  | 1.61E-02 | 9.43   | 5.37  | 7.88E-02 | 7.81   | 7.73   | 3.13E-01 | 12.00  | 10.80 | 2.67E-01 | 6.20   | 7.46  | 4.06E-01 |
| cg20682895 | 25.48  | 10.58 | 1.61E-02 | 9.78   | 20.81 | 6.38E-01 | -4.23  | 50.42  | 9.33E-01 | 35.21  | 14.06 | 1.23E-02 | 24.38  | 29.26 | 4.05E-01 |
| cg23355040 | 22.63  | 9.40  | 1.61E-02 | 20.05  | 15.17 | 1.86E-01 | 42.58  | 35.27  | 2.27E-01 | 12.88  | 7.69  | 9.40E-02 | 63.22  | 25.58 | 1.35E-02 |
| cg07471190 | 24.18  | 10.05 | 1.61E-02 | 21.10  | 20.91 | 3.13E-01 | 42.42  | 24.79  | 8.71E-02 | 15.82  | 14.08 | 2.61E-01 | 44.78  | 32.42 | 1.67E-01 |
| cg10672416 | -13.20 | 5.48  | 1.61E-02 | -6.15  | 10.25 | 5.49E-01 | -0.72  | 13.25  | 9.57E-01 | -21.56 | 8.83  | 1.46E-02 | -19.15 | 13.86 | 1.67E-01 |
| cg09161138 | 20.45  | 8.49  | 1.61E-02 | 22.09  | 13.80 | 1.09E-01 | 20.58  | 17.53  | 2.40E-01 | 22.55  | 16.10 | 1.61E-01 | 8.96   | 25.85 | 7.29E-01 |
| cg19044706 | -22.72 | 9.44  | 1.61E-02 | -30.30 | 17.04 | 7.53E-02 | 16.67  | 38.01  | 6.61E-01 | -36.73 | 18.01 | 4.14E-02 | -12.23 | 15.79 | 4.39E-01 |
| cg10636896 | -11.28 | 4.69  | 1.61E-02 | -5.12  | 9.30  | 5.82E-01 | -16.15 | 18.33  | 3.78E-01 | -12.21 | 6.35  | 5.44E-02 | -16.76 | 12.74 | 1.88E-01 |
| cg11268280 | 9.26   | 3.85  | 1.61E-02 | 12.25  | 5.15  | 1.75E-02 | 14.73  | 9.08   | 1.05E-01 | 7.06   | 13.70 | 6.06E-01 | -4.18  | 8.97  | 6.42E-01 |
| cg00947878 | 7.94   | 3.30  | 1.61E-02 | 6.68   | 3.74  | 7.45E-02 | 20.24  | 7.68   | 8.40E-03 | -0.41  | 7.77  | 9.58E-01 | 7.63   | 6.08  | 2.09E-01 |

|               |        |       |          |        |       |          |         |        |          |        |        |          |        |       |          |
|---------------|--------|-------|----------|--------|-------|----------|---------|--------|----------|--------|--------|----------|--------|-------|----------|
| ch.22.728807R | 15.03  | 6.24  | 1.61E-02 | 14.05  | 8.50  | 9.83E-02 | 7.39    | 13.24  | 5.77E-01 | 73.21  | 37.39  | 5.02E-02 | 17.94  | 13.65 | 1.89E-01 |
| cg00007987    | -24.89 | 10.34 | 1.61E-02 | -22.18 | 19.73 | 2.61E-01 | -2.98   | 55.62  | 9.57E-01 | -26.15 | 14.72  | 7.56E-02 | -29.31 | 23.26 | 2.08E-01 |
| cg00145118    | 10.48  | 4.35  | 1.61E-02 | 13.32  | 5.85  | 2.28E-02 | 17.50   | 11.23  | 1.19E-01 | -4.44  | 10.97  | 6.86E-01 | 8.45   | 11.68 | 4.69E-01 |
| cg26087735    | 19.84  | 8.24  | 1.61E-02 | 27.94  | 15.11 | 6.44E-02 | 10.64   | 14.61  | 4.66E-01 | 20.59  | 17.13  | 2.29E-01 | 22.13  | 21.14 | 2.95E-01 |
| cg02675010    | -24.40 | 10.14 | 1.61E-02 | -59.66 | 34.55 | 8.42E-02 | 63.39   | 117.72 | 5.90E-01 | -19.25 | 10.98  | 7.96E-02 | -61.34 | 43.52 | 1.59E-01 |
| cg07292140    | -11.81 | 4.91  | 1.61E-02 | -13.21 | 12.66 | 2.97E-01 | 9.61    | 16.43  | 5.59E-01 | -16.06 | 6.03   | 7.73E-03 | -0.45  | 15.68 | 9.77E-01 |
| cg24915751    | 43.16  | 17.93 | 1.61E-02 | 42.27  | 20.06 | 3.51E-02 | 25.67   | 125.47 | 8.38E-01 | 81.26  | 61.72  | 1.88E-01 | 20.75  | 57.88 | 7.20E-01 |
| cg15077558    | -24.37 | 10.12 | 1.61E-02 | 2.06   | 25.15 | 9.35E-01 | -65.14  | 79.35  | 4.12E-01 | -27.81 | 11.93  | 1.98E-02 | -35.56 | 31.69 | 2.62E-01 |
| cg17969789    | 15.77  | 6.55  | 1.61E-02 | 13.08  | 10.80 | 2.26E-01 | 14.53   | 13.05  | 2.65E-01 | 12.31  | 15.82  | 4.36E-01 | 24.90  | 14.37 | 8.32E-02 |
| cg09189538    | 8.67   | 3.60  | 1.61E-02 | 7.86   | 8.57  | 3.59E-01 | 13.91   | 13.07  | 2.87E-01 | 6.91   | 4.47   | 1.22E-01 | 17.99  | 11.62 | 1.21E-01 |
| cg04742719    | 9.85   | 4.09  | 1.61E-02 | 8.70   | 5.21  | 9.50E-02 | 15.59   | 10.51  | 1.38E-01 | 10.60  | 12.01  | 3.78E-01 | 7.71   | 12.11 | 5.24E-01 |
| cg20400383    | 30.15  | 12.53 | 1.61E-02 | 73.02  | 37.46 | 5.13E-02 | 55.27   | 166.01 | 7.39E-01 | 25.93  | 14.07  | 6.53E-02 | 12.38  | 41.92 | 7.68E-01 |
| cg06369833    | 33.72  | 14.01 | 1.61E-02 | 50.50  | 39.72 | 2.04E-01 | -144.50 | 165.41 | 3.82E-01 | 36.17  | 15.58  | 2.02E-02 | -13.26 | 57.46 | 8.17E-01 |
| cg07523098    | -31.79 | 13.21 | 1.61E-02 | -35.41 | 16.29 | 2.97E-02 | -47.93  | 40.75  | 2.39E-01 | -42.73 | 48.92  | 3.82E-01 | -2.17  | 32.55 | 9.47E-01 |
| cg11007406    | 23.67  | 9.84  | 1.61E-02 | 41.34  | 16.13 | 1.04E-02 | 41.17   | 31.37  | 1.89E-01 | 9.66   | 20.47  | 6.37E-01 | 6.73   | 18.00 | 7.09E-01 |
| cg04048411    | 24.91  | 10.36 | 1.61E-02 | 32.17  | 17.73 | 6.96E-02 | -75.94  | 55.71  | 1.73E-01 | 26.60  | 11.13  | 1.69E-02 | 28.30  | 27.48 | 3.03E-01 |
| cg23800778    | 17.54  | 7.29  | 1.61E-02 | 20.81  | 14.17 | 1.42E-01 | 0.65    | 12.90  | 9.60E-01 | 26.35  | 12.82  | 3.99E-02 | 35.57  | 23.91 | 1.37E-01 |
| cg15100231    | 26.76  | 11.12 | 1.61E-02 | 19.48  | 16.16 | 2.28E-01 | 45.01   | 25.65  | 7.94E-02 | -5.80  | 35.52  | 8.70E-01 | 40.12  | 22.70 | 7.71E-02 |
| cg01016857    | -10.13 | 4.21  | 1.61E-02 | -14.44 | 5.74  | 1.19E-02 | -7.44   | 10.35  | 4.72E-01 | -12.31 | 12.92  | 3.41E-01 | 1.00   | 9.68  | 9.18E-01 |
| cg15487600    | 26.68  | 11.09 | 1.61E-02 | 9.16   | 22.63 | 6.86E-01 | 23.89   | 58.27  | 6.82E-01 | 31.60  | 14.26  | 2.67E-02 | 37.92  | 32.19 | 2.39E-01 |
| cg14917589    | 22.57  | 9.38  | 1.61E-02 | 32.11  | 19.84 | 1.06E-01 | 30.24   | 21.29  | 1.55E-01 | 7.54   | 13.62  | 5.80E-01 | 55.28  | 28.64 | 5.35E-02 |
| cg20459332    | 43.60  | 18.13 | 1.61E-02 | 44.53  | 23.80 | 6.14E-02 | -29.86  | 63.56  | 6.39E-01 | 43.52  | 66.09  | 5.10E-01 | 64.24  | 35.30 | 6.88E-02 |
| cg19197915    | -18.32 | 7.62  | 1.62E-02 | -22.13 | 9.68  | 2.22E-02 | -12.99  | 25.47  | 6.10E-01 | -30.96 | 10.54  | 3.31E-03 | 3.54   | 13.54 | 7.94E-01 |
| cg26511321    | 18.04  | 7.50  | 1.62E-02 | 20.88  | 11.75 | 7.55E-02 | 27.56   | 19.05  | 1.48E-01 | 33.11  | 23.43  | 1.58E-01 | 5.57   | 12.95 | 6.67E-01 |
| cg19818278    | 50.64  | 21.06 | 1.62E-02 | 65.68  | 25.45 | 9.86E-03 | -56.65  | 102.41 | 5.80E-01 | -4.20  | 110.41 | 9.70E-01 | 34.78  | 43.26 | 4.21E-01 |
| cg22315928    | -11.62 | 4.83  | 1.62E-02 | -12.45 | 12.24 | 3.09E-01 | 10.41   | 16.90  | 5.38E-01 | -13.07 | 6.05   | 3.09E-02 | -17.59 | 13.63 | 1.97E-01 |
| cg20250250    | -9.81  | 4.08  | 1.62E-02 | -13.98 | 7.42  | 5.94E-02 | -28.65  | 12.93  | 2.67E-02 | -5.98  | 5.20   | 2.50E-01 | -3.72  | 9.22  | 6.87E-01 |
| cg23971517    | -19.04 | 7.92  | 1.62E-02 | -38.63 | 17.94 | 3.13E-02 | 0.57    | 18.01  | 9.75E-01 | -19.34 | 11.24  | 8.53E-02 | -17.49 | 23.25 | 4.52E-01 |
| cg03169059    | 7.15   | 2.97  | 1.62E-02 | 7.20   | 3.83  | 6.04E-02 | 13.11   | 7.32   | 7.34E-02 | 9.09   | 9.01   | 3.13E-01 | -2.55  | 8.36  | 7.60E-01 |
| cg02747822    | 16.53  | 6.87  | 1.62E-02 | 25.68  | 9.91  | 9.55E-03 | 20.31   | 14.46  | 1.60E-01 | -1.64  | 16.85  | 9.23E-01 | -1.11  | 19.33 | 9.54E-01 |
| cg19418190    | -15.80 | 6.57  | 1.62E-02 | -22.62 | 14.32 | 1.14E-01 | -18.53  | 36.37  | 6.10E-01 | -16.44 | 8.14   | 4.34E-02 | 2.66   | 20.27 | 8.95E-01 |
| cg20919730    | -7.86  | 3.27  | 1.62E-02 | -14.25 | 5.53  | 9.97E-03 | -2.17   | 9.44   | 8.18E-01 | -2.66  | 5.19   | 6.08E-01 | -11.74 | 8.95  | 1.90E-01 |
| cg26398044    | -10.38 | 4.32  | 1.62E-02 | -19.35 | 7.81  | 1.33E-02 | 1.87    | 11.52  | 8.71E-01 | -6.13  | 7.36   | 4.05E-01 | -12.49 | 9.41  | 1.84E-01 |
| cg13042252    | 43.39  | 18.04 | 1.62E-02 | 44.05  | 23.15 | 5.70E-02 | 20.97   | 70.66  | 7.67E-01 | 122.55 | 53.73  | 2.25E-02 | 11.54  | 36.15 | 7.50E-01 |
| cg23696808    | 24.66  | 10.26 | 1.62E-02 | 26.17  | 13.40 | 5.09E-02 | 31.07   | 34.16  | 3.63E-01 | -24.99 | 49.74  | 6.15E-01 | 26.98  | 19.32 | 1.63E-01 |

|            |        |       |          |        |       |          |        |        |          |        |       |          |        |       |          |
|------------|--------|-------|----------|--------|-------|----------|--------|--------|----------|--------|-------|----------|--------|-------|----------|
| cg02440396 | -7.11  | 2.96  | 1.62E-02 | -11.52 | 5.52  | 3.71E-02 | -3.31  | 8.73   | 7.04E-01 | -5.53  | 4.29  | 1.97E-01 | -6.51  | 8.42  | 4.40E-01 |
| cg14381448 | 11.68  | 4.86  | 1.62E-02 | 13.08  | 7.52  | 8.18E-02 | 20.22  | 10.04  | 4.40E-02 | -1.28  | 11.38 | 9.11E-01 | 10.34  | 11.93 | 3.86E-01 |
| cg04747180 | 5.67   | 2.36  | 1.62E-02 | 4.00   | 2.98  | 1.80E-01 | 12.12  | 5.66   | 3.21E-02 | 11.14  | 7.00  | 1.11E-01 | -0.52  | 6.86  | 9.40E-01 |
| cg18005693 | 11.05  | 4.60  | 1.62E-02 | 22.34  | 12.01 | 6.30E-02 | 20.86  | 37.17  | 5.75E-01 | 6.99   | 5.52  | 2.06E-01 | 18.01  | 12.04 | 1.35E-01 |
| cg01549929 | 12.23  | 5.09  | 1.62E-02 | -2.59  | 13.36 | 8.46E-01 | 19.72  | 16.02  | 2.18E-01 | 14.91  | 6.14  | 1.52E-02 | 5.75   | 19.55 | 7.69E-01 |
| cg24109273 | -14.03 | 5.83  | 1.62E-02 | -20.74 | 10.92 | 5.75E-02 | 24.48  | 52.28  | 6.40E-01 | -15.18 | 8.23  | 6.52E-02 | -3.93  | 13.05 | 7.63E-01 |
| cg12868320 | 20.23  | 8.41  | 1.62E-02 | 2.74   | 15.56 | 8.60E-01 | 29.80  | 16.00  | 6.25E-02 | 35.93  | 15.43 | 1.99E-02 | 6.67   | 21.02 | 7.51E-01 |
| cg02586852 | -13.87 | 5.77  | 1.62E-02 | -14.38 | 11.83 | 2.24E-01 | -4.24  | 22.43  | 8.50E-01 | -12.23 | 7.24  | 9.11E-02 | -39.08 | 23.25 | 9.28E-02 |
| cg11822932 | 7.10   | 2.95  | 1.62E-02 | 5.75   | 3.78  | 1.28E-01 | 11.69  | 7.13   | 1.01E-01 | 10.53  | 11.05 | 3.41E-01 | 5.70   | 7.74  | 4.62E-01 |
| cg17774797 | 39.14  | 16.28 | 1.62E-02 | 44.74  | 20.12 | 2.62E-02 | -4.47  | 61.16  | 9.42E-01 | -27.37 | 76.95 | 7.22E-01 | 49.56  | 33.95 | 1.44E-01 |
| cg15801433 | -11.42 | 4.75  | 1.62E-02 | -15.08 | 7.28  | 3.85E-02 | -5.96  | 10.87  | 5.84E-01 | -10.72 | 12.87 | 4.05E-01 | -9.75  | 9.55  | 3.08E-01 |
| cg03175049 | 24.96  | 10.38 | 1.62E-02 | 37.21  | 18.92 | 4.92E-02 | 21.06  | 18.35  | 2.51E-01 | 5.82   | 16.49 | 7.24E-01 | 61.94  | 29.68 | 3.69E-02 |
| cg23275972 | -19.27 | 8.02  | 1.62E-02 | -25.48 | 12.36 | 3.92E-02 | 0.93   | 20.54  | 9.64E-01 | -23.90 | 17.74 | 1.78E-01 | -17.11 | 17.00 | 3.14E-01 |
| cg11263507 | 18.65  | 7.76  | 1.62E-02 | 25.07  | 22.28 | 2.60E-01 | 77.47  | 91.54  | 3.97E-01 | 16.93  | 8.62  | 4.95E-02 | 21.87  | 31.46 | 4.87E-01 |
| cg20038187 | -10.07 | 4.19  | 1.62E-02 | -7.96  | 7.51  | 2.89E-01 | -10.23 | 9.48   | 2.81E-01 | -9.12  | 7.49  | 2.23E-01 | -15.20 | 9.86  | 1.23E-01 |
| cg22967008 | -10.20 | 4.24  | 1.62E-02 | -6.15  | 5.97  | 3.02E-01 | -23.98 | 8.96   | 7.43E-03 | -10.26 | 13.02 | 4.31E-01 | -5.23  | 8.79  | 5.52E-01 |
| cg02062326 | 11.06  | 4.60  | 1.62E-02 | 25.84  | 12.89 | 4.51E-02 | 8.03   | 27.53  | 7.71E-01 | 10.47  | 5.20  | 4.40E-02 | -10.80 | 18.62 | 5.62E-01 |
| cg09012125 | 10.66  | 4.43  | 1.62E-02 | 10.27  | 7.36  | 1.63E-01 | 17.76  | 9.98   | 7.53E-02 | 15.63  | 8.63  | 7.01E-02 | -3.99  | 10.58 | 7.06E-01 |
| cg02423817 | -7.14  | 2.97  | 1.62E-02 | -8.09  | 3.60  | 2.48E-02 | -4.12  | 6.98   | 5.55E-01 | -3.25  | 12.07 | 7.88E-01 | -8.85  | 10.53 | 4.01E-01 |
| cg25631489 | -10.68 | 4.44  | 1.63E-02 | -14.33 | 6.30  | 2.28E-02 | -5.93  | 10.51  | 5.73E-01 | -2.30  | 17.12 | 8.93E-01 | -9.09  | 8.78  | 3.01E-01 |
| cg10625578 | 36.50  | 15.19 | 1.63E-02 | 55.03  | 44.36 | 2.15E-01 | 177.22 | 169.87 | 2.97E-01 | 38.09  | 17.01 | 2.51E-02 | -22.58 | 54.63 | 6.79E-01 |
| cg26603050 | 17.74  | 7.38  | 1.63E-02 | 15.54  | 10.08 | 1.23E-01 | 25.41  | 18.38  | 1.67E-01 | 46.54  | 18.95 | 1.40E-02 | 6.03   | 10.38 | 5.61E-01 |
| cg26560794 | 25.76  | 10.72 | 1.63E-02 | 40.78  | 40.79 | 3.17E-01 | 15.52  | 160.00 | 9.23E-01 | 25.11  | 11.59 | 3.02E-02 | 19.52  | 40.27 | 6.28E-01 |
| cg09134593 | 20.25  | 8.43  | 1.63E-02 | 27.46  | 12.62 | 2.95E-02 | 21.27  | 22.74  | 3.50E-01 | 31.33  | 24.41 | 1.99E-01 | 4.52   | 15.46 | 7.70E-01 |
| cg00867901 | -10.43 | 4.34  | 1.63E-02 | -13.27 | 5.99  | 2.67E-02 | -3.71  | 11.90  | 7.56E-01 | -15.37 | 12.28 | 2.11E-01 | -4.82  | 9.32  | 6.05E-01 |
| cg19112564 | -39.62 | 16.49 | 1.63E-02 | -46.36 | 50.80 | 3.61E-01 | 34.36  | 237.42 | 8.85E-01 | -39.54 | 18.53 | 3.29E-02 | -36.68 | 52.71 | 4.86E-01 |
| cg11364468 | 19.45  | 8.10  | 1.63E-02 | 23.66  | 16.98 | 1.63E-01 | -6.74  | 33.94  | 8.43E-01 | 22.66  | 11.21 | 4.33E-02 | 13.58  | 18.35 | 4.59E-01 |
| cg04738237 | -12.18 | 5.07  | 1.63E-02 | -14.88 | 7.38  | 4.38E-02 | -8.65  | 11.99  | 4.71E-01 | -5.51  | 13.11 | 6.74E-01 | -13.98 | 11.37 | 2.19E-01 |
| cg17579667 | 11.97  | 4.98  | 1.63E-02 | 19.31  | 12.08 | 1.10E-01 | 9.82   | 20.24  | 6.28E-01 | 16.63  | 6.88  | 1.56E-02 | -2.66  | 10.10 | 7.92E-01 |
| cg26023087 | 27.13  | 11.30 | 1.63E-02 | 29.82  | 16.12 | 6.44E-02 | 20.49  | 32.47  | 5.28E-01 | 46.74  | 30.77 | 1.29E-01 | 14.66  | 22.44 | 5.14E-01 |
| cg05578398 | 21.69  | 9.03  | 1.63E-02 | 44.87  | 31.97 | 1.61E-01 | 39.65  | 120.10 | 7.41E-01 | 19.36  | 9.72  | 4.63E-02 | 22.88  | 40.10 | 5.68E-01 |
| cg03316237 | 18.55  | 7.73  | 1.63E-02 | 22.65  | 10.85 | 3.69E-02 | 1.18   | 18.95  | 9.50E-01 | 45.49  | 21.56 | 3.48E-02 | 6.93   | 16.28 | 6.70E-01 |
| cg07219667 | 31.27  | 13.02 | 1.63E-02 | 36.19  | 35.99 | 3.15E-01 | -27.39 | 66.46  | 6.80E-01 | 32.97  | 16.17 | 4.15E-02 | 34.06  | 30.48 | 2.64E-01 |
| cg22521151 | 19.87  | 8.27  | 1.63E-02 | 20.10  | 18.28 | 2.72E-01 | 13.68  | 17.15  | 4.25E-01 | 17.06  | 12.85 | 1.84E-01 | 37.10  | 21.49 | 8.43E-02 |
| cg05649906 | -13.20 | 5.49  | 1.63E-02 | -28.28 | 15.06 | 6.04E-02 | -22.63 | 20.17  | 2.62E-01 | -8.50  | 6.49  | 1.91E-01 | -21.70 | 19.82 | 2.74E-01 |

|            |        |       |          |        |       |          |         |        |          |        |       |          |        |       |          |
|------------|--------|-------|----------|--------|-------|----------|---------|--------|----------|--------|-------|----------|--------|-------|----------|
| cg19765175 | -13.55 | 5.64  | 1.63E-02 | -13.86 | 8.66  | 1.10E-01 | -16.22  | 15.54  | 2.97E-01 | -11.42 | 12.94 | 3.77E-01 | -13.23 | 11.20 | 2.37E-01 |
| cg02571198 | -18.87 | 7.86  | 1.63E-02 | -9.30  | 21.99 | 6.72E-01 | -6.96   | 28.41  | 8.06E-01 | -19.42 | 9.22  | 3.51E-02 | -44.37 | 30.11 | 1.41E-01 |
| cg02858413 | 39.33  | 16.38 | 1.63E-02 | 20.26  | 47.97 | 6.73E-01 | -107.57 | 159.06 | 4.99E-01 | 45.70  | 18.48 | 1.34E-02 | 25.34  | 55.41 | 6.47E-01 |
| cg00029282 | 36.38  | 15.15 | 1.63E-02 | 31.76  | 23.43 | 1.75E-01 | 38.41   | 30.41  | 2.07E-01 | 67.84  | 40.17 | 9.13E-02 | 20.45  | 34.65 | 5.55E-01 |
| cg23465213 | 11.88  | 4.95  | 1.63E-02 | 7.20   | 11.39 | 5.27E-01 | 1.49    | 11.33  | 8.96E-01 | 13.85  | 6.93  | 4.55E-02 | 28.84  | 14.93 | 5.35E-02 |
| cg18196900 | 12.88  | 5.37  | 1.63E-02 | 16.19  | 9.75  | 9.68E-02 | 24.79   | 14.51  | 8.76E-02 | 13.10  | 8.07  | 1.04E-01 | -10.21 | 15.62 | 5.13E-01 |
| cg11452221 | 22.19  | 9.24  | 1.63E-02 | 25.35  | 14.42 | 7.87E-02 | 9.17    | 25.76  | 7.22E-01 | 31.89  | 22.12 | 1.49E-01 | 17.59  | 17.28 | 3.09E-01 |
| cg04791477 | 32.52  | 13.54 | 1.64E-02 | 49.06  | 20.36 | 1.60E-02 | 11.27   | 53.60  | 8.33E-01 | 21.85  | 31.12 | 4.83E-01 | 19.58  | 24.54 | 4.25E-01 |
| cg19775718 | -11.36 | 4.73  | 1.64E-02 | -12.93 | 8.82  | 1.43E-01 | -8.07   | 12.70  | 5.25E-01 | -17.05 | 6.51  | 8.85E-03 | 7.94   | 12.63 | 5.30E-01 |
| cg08287940 | 5.97   | 2.49  | 1.64E-02 | 6.06   | 3.31  | 6.71E-02 | 9.88    | 5.96   | 9.74E-02 | 4.99   | 6.85  | 4.66E-01 | 1.31   | 6.94  | 8.50E-01 |
| cg26289824 | -59.31 | 24.70 | 1.64E-02 | -56.99 | 30.96 | 6.57E-02 | -254.07 | 122.91 | 3.87E-02 | -0.35  | 90.56 | 9.97E-01 | -51.24 | 49.54 | 3.01E-01 |
| cg07826522 | 25.54  | 10.64 | 1.64E-02 | 22.42  | 19.74 | 2.56E-01 | 31.38   | 23.01  | 1.73E-01 | 14.48  | 18.21 | 4.27E-01 | 47.72  | 27.05 | 7.77E-02 |
| cg01515574 | -7.49  | 3.12  | 1.64E-02 | -11.02 | 5.25  | 3.59E-02 | -7.81   | 7.80   | 3.16E-01 | -8.23  | 5.86  | 1.61E-01 | -0.10  | 6.91  | 9.89E-01 |
| cg06030535 | 6.07   | 2.53  | 1.64E-02 | 4.07   | 3.38  | 2.29E-01 | 11.68   | 5.78   | 4.33E-02 | 13.38  | 8.68  | 1.23E-01 | 2.58   | 6.22  | 6.79E-01 |
| cg13095737 | 12.99  | 5.41  | 1.64E-02 | 5.31   | 7.70  | 4.91E-01 | 15.17   | 9.97   | 1.28E-01 | 3.74   | 15.36 | 8.08E-01 | 27.78  | 10.35 | 7.29E-03 |
| cg16548154 | 16.11  | 6.71  | 1.64E-02 | 21.88  | 9.50  | 2.13E-02 | 22.10   | 13.75  | 1.08E-01 | 6.46   | 20.30 | 7.50E-01 | -5.09  | 17.15 | 7.67E-01 |
| cg17037355 | 12.57  | 5.24  | 1.64E-02 | 6.32   | 5.90  | 2.84E-01 | 5.50    | 9.86   | 5.77E-01 | 18.89  | 14.65 | 1.97E-01 | 26.00  | 8.76  | 2.99E-03 |
| cg19786983 | -11.09 | 4.62  | 1.64E-02 | -17.93 | 7.27  | 1.37E-02 | -16.00  | 11.58  | 1.67E-01 | 1.48   | 9.67  | 8.78E-01 | -7.86  | 10.09 | 4.36E-01 |
| cg02611466 | 17.06  | 7.11  | 1.64E-02 | 12.61  | 20.39 | 5.36E-01 | 34.42   | 26.05  | 1.86E-01 | 16.67  | 8.27  | 4.37E-02 | 9.89   | 27.96 | 7.23E-01 |
| cg02279537 | 23.64  | 9.85  | 1.64E-02 | 38.71  | 16.66 | 2.01E-02 | -19.83  | 22.25  | 3.73E-01 | 23.55  | 7.50  | 1.70E-03 | 38.49  | 17.08 | 2.43E-02 |
| cg21030400 | -8.00  | 3.33  | 1.64E-02 | -5.99  | 4.41  | 1.74E-01 | -12.69  | 7.34   | 8.37E-02 | -7.83  | 11.70 | 5.03E-01 | -9.31  | 8.81  | 2.91E-01 |
| cg08410996 | 19.21  | 8.00  | 1.64E-02 | 6.01   | 10.02 | 5.49E-01 | 43.35   | 16.86  | 1.01E-02 | 16.88  | 20.08 | 4.01E-01 | 23.37  | 13.33 | 7.94E-02 |
| cg08626876 | -6.68  | 2.78  | 1.64E-02 | -5.97  | 5.00  | 2.32E-01 | -1.80   | 8.44   | 8.31E-01 | -11.21 | 4.29  | 8.89E-03 | 0.58   | 6.95  | 9.33E-01 |
| cg11186365 | 20.47  | 8.53  | 1.64E-02 | 19.36  | 17.66 | 2.73E-01 | -11.61  | 44.79  | 7.96E-01 | 27.73  | 10.75 | 9.90E-03 | -10.67 | 26.83 | 6.91E-01 |
| cg11863717 | 11.59  | 4.83  | 1.64E-02 | 23.47  | 13.56 | 8.36E-02 | 40.89   | 43.51  | 3.47E-01 | 9.94   | 5.55  | 7.33E-02 | 5.65   | 15.00 | 7.07E-01 |
| cg26362078 | -9.72  | 4.05  | 1.64E-02 | -8.60  | 6.97  | 2.17E-01 | -3.05   | 10.57  | 7.73E-01 | -14.71 | 6.59  | 2.57E-02 | -5.93  | 10.90 | 5.86E-01 |
| cg07773434 | 9.23   | 3.85  | 1.64E-02 | 11.16  | 5.45  | 4.05E-02 | 9.69    | 8.55   | 2.57E-01 | 6.40   | 10.09 | 5.26E-01 | 5.04   | 9.83  | 6.08E-01 |
| cg25120290 | 16.16  | 6.74  | 1.64E-02 | 16.38  | 14.16 | 2.48E-01 | 10.75   | 42.01  | 7.98E-01 | 16.50  | 8.81  | 6.12E-02 | 15.52  | 16.64 | 3.51E-01 |
| cg08202895 | 14.45  | 6.02  | 1.64E-02 | 26.66  | 13.96 | 5.61E-02 | 4.61    | 16.88  | 7.85E-01 | 16.41  | 8.03  | 4.09E-02 | -2.79  | 17.16 | 8.71E-01 |
| cg13644645 | 17.79  | 7.42  | 1.64E-02 | 22.54  | 15.56 | 1.48E-01 | 3.80    | 35.84  | 9.16E-01 | 18.98  | 9.18  | 3.87E-02 | 1.65   | 26.65 | 9.51E-01 |
| cg17926114 | 51.55  | 21.48 | 1.64E-02 | 58.25  | 30.10 | 5.30E-02 | 19.25   | 61.92  | 7.56E-01 | 102.56 | 65.54 | 1.18E-01 | 32.49  | 41.91 | 4.38E-01 |
| cg25509121 | -16.85 | 7.03  | 1.64E-02 | -22.53 | 18.00 | 2.11E-01 | -27.93  | 82.43  | 7.35E-01 | -14.56 | 8.15  | 7.41E-02 | -24.67 | 22.49 | 2.73E-01 |
| cg01115274 | 15.61  | 6.51  | 1.64E-02 | 23.25  | 14.83 | 1.17E-01 | 3.74    | 23.45  | 8.73E-01 | 13.71  | 8.45  | 1.05E-01 | 19.70  | 17.50 | 2.60E-01 |
| cg00789671 | -17.54 | 7.31  | 1.64E-02 | -24.34 | 10.33 | 1.85E-02 | -5.77   | 20.96  | 7.83E-01 | 13.37  | 22.56 | 5.54E-01 | -22.20 | 14.01 | 1.13E-01 |
| cg19302555 | -35.28 | 14.71 | 1.65E-02 | -29.01 | 18.07 | 1.08E-01 | 19.10   | 51.50  | 7.11E-01 | -77.26 | 29.67 | 9.22E-03 | -25.61 | 32.55 | 4.31E-01 |

|            |        |       |          |        |       |          |        |        |          |         |       |          |        |       |          |
|------------|--------|-------|----------|--------|-------|----------|--------|--------|----------|---------|-------|----------|--------|-------|----------|
| cg09447808 | 17.69  | 7.38  | 1.65E-02 | 25.09  | 10.77 | 1.99E-02 | 13.96  | 27.16  | 6.07E-01 | 2.77    | 23.55 | 9.06E-01 | 12.89  | 12.30 | 2.95E-01 |
| cg11222836 | 29.05  | 12.11 | 1.65E-02 | 34.01  | 20.74 | 1.01E-01 | 25.89  | 30.61  | 3.98E-01 | 31.17   | 20.47 | 1.28E-01 | 16.33  | 30.98 | 5.98E-01 |
| cg03736826 | -10.64 | 4.43  | 1.65E-02 | -7.61  | 6.83  | 2.66E-01 | -12.08 | 8.78   | 1.69E-01 | -18.88  | 13.41 | 1.59E-01 | -10.67 | 9.57  | 2.65E-01 |
| cg03227037 | 12.22  | 5.10  | 1.65E-02 | 12.42  | 6.97  | 7.47E-02 | 23.86  | 9.74   | 1.43E-02 | 5.98    | 19.74 | 7.62E-01 | -2.50  | 11.65 | 8.30E-01 |
| cg11399100 | 24.17  | 10.08 | 1.65E-02 | 24.63  | 14.99 | 1.00E-01 | 13.65  | 30.03  | 6.49E-01 | 36.00   | 24.46 | 1.41E-01 | 20.29  | 19.54 | 2.99E-01 |
| cg20984614 | -15.12 | 6.30  | 1.65E-02 | -24.94 | 16.49 | 1.30E-01 | 5.63   | 35.21  | 8.73E-01 | -12.31  | 7.25  | 8.95E-02 | -36.13 | 24.77 | 1.45E-01 |
| cg15751117 | -14.71 | 6.13  | 1.65E-02 | -15.72 | 11.41 | 1.68E-01 | -6.86  | 16.69  | 6.81E-01 | -13.91  | 9.57  | 1.46E-01 | -21.30 | 15.07 | 1.58E-01 |
| cg15074033 | 18.95  | 7.90  | 1.65E-02 | 40.56  | 19.94 | 4.20E-02 | 26.47  | 29.21  | 3.65E-01 | 22.92   | 11.83 | 5.26E-02 | 1.29   | 13.90 | 9.26E-01 |
| cg18301598 | -10.38 | 4.33  | 1.65E-02 | -23.40 | 8.29  | 4.75E-03 | -9.38  | 16.68  | 5.74E-01 | -6.74   | 4.68  | 1.50E-01 | -3.50  | 11.28 | 7.57E-01 |
| cg14509581 | 26.13  | 10.90 | 1.65E-02 | 46.61  | 26.13 | 7.45E-02 | 49.97  | 121.95 | 6.82E-01 | 27.97   | 12.86 | 2.96E-02 | -24.51 | 34.44 | 4.77E-01 |
| cg07447870 | -8.29  | 3.45  | 1.65E-02 | -13.33 | 4.83  | 5.81E-03 | -2.49  | 7.73   | 7.48E-01 | -11.71  | 12.58 | 3.52E-01 | -0.44  | 7.47  | 9.53E-01 |
| cg22846516 | -57.91 | 24.15 | 1.65E-02 | -33.95 | 34.97 | 3.32E-01 | 13.78  | 147.05 | 9.25E-01 | -127.69 | 50.83 | 1.20E-02 | -49.07 | 46.43 | 2.91E-01 |
| cg04387418 | -27.62 | 11.52 | 1.65E-02 | -8.41  | 37.53 | 8.23E-01 | -75.76 | 172.09 | 6.60E-01 | -31.84  | 12.51 | 1.09E-02 | 9.26   | 49.65 | 8.52E-01 |
| cg03533561 | -16.57 | 6.91  | 1.65E-02 | -36.27 | 14.11 | 1.01E-02 | -2.52  | 14.80  | 8.65E-01 | -11.65  | 11.99 | 3.31E-01 | -16.42 | 14.82 | 2.68E-01 |
| cg18244487 | 7.76   | 3.24  | 1.65E-02 | 6.35   | 3.94  | 1.07E-01 | 18.29  | 8.28   | 2.72E-02 | 7.01    | 12.12 | 5.63E-01 | 1.84   | 10.13 | 8.56E-01 |
| cg17397836 | -13.11 | 5.47  | 1.65E-02 | -17.02 | 7.75  | 2.80E-02 | -12.26 | 12.85  | 3.40E-01 | 10.95   | 15.66 | 4.84E-01 | -18.87 | 12.27 | 1.24E-01 |
| cg06940309 | -37.93 | 15.82 | 1.65E-02 | -85.66 | 54.60 | 1.17E-01 | -49.75 | 176.77 | 7.78E-01 | -40.51  | 17.38 | 1.98E-02 | 39.92  | 55.87 | 4.75E-01 |
| cg27371984 | 22.21  | 9.26  | 1.65E-02 | 21.26  | 21.63 | 3.26E-01 | 27.94  | 58.59  | 6.33E-01 | 24.04   | 11.93 | 4.38E-02 | 16.51  | 21.33 | 4.39E-01 |
| cg02767093 | -15.89 | 6.63  | 1.65E-02 | -20.40 | 10.10 | 4.33E-02 | 1.14   | 19.43  | 9.53E-01 | -5.74   | 10.46 | 5.83E-01 | -32.58 | 13.33 | 1.45E-02 |
| cg00971332 | 18.68  | 7.79  | 1.65E-02 | 31.70  | 19.92 | 1.12E-01 | 21.75  | 24.00  | 3.65E-01 | 14.03   | 9.51  | 1.40E-01 | 29.92  | 29.19 | 3.05E-01 |
| cg07513435 | -25.09 | 10.47 | 1.65E-02 | 4.46   | 22.31 | 8.42E-01 | 7.54   | 61.86  | 9.03E-01 | -35.89  | 13.50 | 7.85E-03 | -31.43 | 27.01 | 2.45E-01 |
| cg15735129 | -8.58  | 3.58  | 1.65E-02 | -18.79 | 8.65  | 2.99E-02 | 0.20   | 13.32  | 9.88E-01 | -7.51   | 4.43  | 9.05E-02 | -4.65  | 10.96 | 6.71E-01 |
| cg24598712 | 11.06  | 4.61  | 1.65E-02 | 10.38  | 6.14  | 9.06E-02 | 21.08  | 11.09  | 5.74E-02 | 15.38   | 13.54 | 2.56E-01 | -1.63  | 12.08 | 8.93E-01 |
| cg15470261 | -56.13 | 23.41 | 1.65E-02 | -82.49 | 31.39 | 8.59E-03 | 51.90  | 159.55 | 7.45E-01 | -9.18   | 54.40 | 8.66E-01 | -40.74 | 48.11 | 3.97E-01 |
| cg07756647 | 36.76  | 15.34 | 1.65E-02 | 44.32  | 18.69 | 1.77E-02 | 64.39  | 31.99  | 4.41E-02 | -13.30  | 28.70 | 6.43E-01 | 49.85  | 28.33 | 7.85E-02 |
| cg08472449 | 8.20   | 3.42  | 1.65E-02 | 9.11   | 4.73  | 5.43E-02 | 7.59   | 6.91   | 2.72E-01 | -7.23   | 12.22 | 5.54E-01 | 14.01  | 8.74  | 1.09E-01 |
| cg03715846 | 10.18  | 4.25  | 1.65E-02 | 13.96  | 6.21  | 2.46E-02 | 6.79   | 12.44  | 5.85E-01 | 7.14    | 9.68  | 4.61E-01 | 6.67   | 9.00  | 4.59E-01 |
| cg16411445 | -15.60 | 6.51  | 1.65E-02 | -19.12 | 8.57  | 2.56E-02 | 17.58  | 25.22  | 4.86E-01 | -33.19  | 20.02 | 9.72E-02 | -8.89  | 12.99 | 4.94E-01 |
| cg00117005 | 67.57  | 28.19 | 1.65E-02 | 22.38  | 38.64 | 5.63E-01 | -17.10 | 123.42 | 8.90E-01 | 124.02  | 45.49 | 6.40E-03 | 87.80  | 53.12 | 9.84E-02 |
| cg16179674 | 8.90   | 3.71  | 1.65E-02 | 5.25   | 4.99  | 2.92E-01 | 20.68  | 9.24   | 2.52E-02 | 15.49   | 9.75  | 1.12E-01 | 2.91   | 9.91  | 7.69E-01 |
| cg26913155 | -15.50 | 6.47  | 1.65E-02 | -19.83 | 10.73 | 6.45E-02 | -21.80 | 14.88  | 1.43E-01 | -0.69   | 13.95 | 9.61E-01 | -17.30 | 13.40 | 1.97E-01 |
| cg06739256 | -11.37 | 4.75  | 1.65E-02 | -27.55 | 11.42 | 1.59E-02 | -12.69 | 20.48  | 5.35E-01 | -7.04   | 5.78  | 2.23E-01 | -12.01 | 15.10 | 4.26E-01 |
| cg21740264 | -32.09 | 13.39 | 1.65E-02 | -10.12 | 33.81 | 7.65E-01 | -89.88 | 176.33 | 6.10E-01 | -34.25  | 15.09 | 2.33E-02 | -60.18 | 59.64 | 3.13E-01 |
| cg17010118 | 18.80  | 7.84  | 1.65E-02 | 44.03  | 21.00 | 3.60E-02 | 24.05  | 22.65  | 2.88E-01 | 11.73   | 9.57  | 2.20E-01 | 27.45  | 29.82 | 3.57E-01 |
| cg10531637 | -10.62 | 4.43  | 1.65E-02 | -11.40 | 5.75  | 4.75E-02 | -13.81 | 10.31  | 1.80E-01 | -4.26   | 17.52 | 8.08E-01 | -6.54  | 11.16 | 5.58E-01 |

|            |        |       |          |        |       |          |        |        |          |        |        |          |        |        |          |
|------------|--------|-------|----------|--------|-------|----------|--------|--------|----------|--------|--------|----------|--------|--------|----------|
| cg19638477 | 26.84  | 11.20 | 1.65E-02 | 37.29  | 18.16 | 4.00E-02 | 19.50  | 34.20  | 5.69E-01 | 32.05  | 21.74  | 1.40E-01 | 8.35   | 22.53  | 7.11E-01 |
| cg22570970 | 7.91   | 3.30  | 1.65E-02 | 10.28  | 4.61  | 2.56E-02 | 8.45   | 7.48   | 2.58E-01 | 6.30   | 9.90   | 5.24E-01 | 1.58   | 7.76   | 8.39E-01 |
| cg14196303 | 51.58  | 21.52 | 1.65E-02 | 47.45  | 26.34 | 7.17E-02 | 191.82 | 101.69 | 5.93E-02 | -36.24 | 102.61 | 7.24E-01 | 52.94  | 43.58  | 2.24E-01 |
| cg09934326 | -46.96 | 19.59 | 1.66E-02 | -70.26 | 26.89 | 8.98E-03 | -30.86 | 65.47  | 6.37E-01 | 37.12  | 75.61  | 6.23E-01 | -30.03 | 35.07  | 3.92E-01 |
| cg17705041 | 10.93  | 4.56  | 1.66E-02 | 14.70  | 6.23  | 1.83E-02 | 11.43  | 12.26  | 3.51E-01 | 13.07  | 10.26  | 2.03E-01 | -8.65  | 12.74  | 4.97E-01 |
| cg14809932 | -14.57 | 6.08  | 1.66E-02 | -28.19 | 12.78 | 2.74E-02 | -13.51 | 21.68  | 5.33E-01 | -7.69  | 8.07   | 3.40E-01 | -21.72 | 17.06  | 2.03E-01 |
| cg06350432 | 98.80  | 41.23 | 1.66E-02 | 93.55  | 56.01 | 9.49E-02 | 48.01  | 303.43 | 8.74E-01 | 87.24  | 74.91  | 2.44E-01 | 152.13 | 111.56 | 1.73E-01 |
| cg14959580 | -7.13  | 2.98  | 1.66E-02 | -3.91  | 4.36  | 3.71E-01 | -6.20  | 5.49   | 2.58E-01 | -17.53 | 14.02  | 2.11E-01 | -13.80 | 6.73   | 4.03E-02 |
| cg09772075 | -8.43  | 3.52  | 1.66E-02 | -6.93  | 5.16  | 1.79E-01 | -19.10 | 8.71   | 2.83E-02 | 1.72   | 9.29   | 8.53E-01 | -10.25 | 7.38   | 1.65E-01 |
| cg16926734 | 12.90  | 5.38  | 1.66E-02 | 1.62   | 11.48 | 8.88E-01 | 3.48   | 15.87  | 8.27E-01 | 17.07  | 6.89   | 1.32E-02 | 32.00  | 23.29  | 1.69E-01 |
| cg18241780 | -27.73 | 11.57 | 1.66E-02 | -32.12 | 14.93 | 3.14E-02 | -9.58  | 36.73  | 7.94E-01 | 58.22  | 55.16  | 2.91E-01 | -39.06 | 22.53  | 8.30E-02 |
| cg14704968 | -9.69  | 4.04  | 1.66E-02 | -12.36 | 9.46  | 1.91E-01 | -4.73  | 18.00  | 7.93E-01 | -10.51 | 5.00   | 3.55E-02 | -2.76  | 12.07  | 8.19E-01 |
| cg12614318 | 11.34  | 4.73  | 1.66E-02 | 8.96   | 6.97  | 1.98E-01 | 7.78   | 12.54  | 5.35E-01 | 32.61  | 12.95  | 1.18E-02 | 7.22   | 8.27   | 3.83E-01 |
| cg18753341 | 73.12  | 30.52 | 1.66E-02 | 83.64  | 41.65 | 4.46E-02 | 195.22 | 187.49 | 2.98E-01 | -6.53  | 92.64  | 9.44E-01 | 72.38  | 53.31  | 1.75E-01 |
| cg01824931 | -14.18 | 5.92  | 1.66E-02 | -11.49 | 10.31 | 2.65E-01 | -22.70 | 13.17  | 8.49E-02 | -15.70 | 12.36  | 2.04E-01 | -9.23  | 12.09  | 4.45E-01 |
| cg00960700 | 13.74  | 5.73  | 1.66E-02 | 13.05  | 20.66 | 5.27E-01 | 33.25  | 25.75  | 1.97E-01 | 14.43  | 6.94   | 3.76E-02 | 6.44   | 13.14  | 6.24E-01 |
| cg11130441 | 15.29  | 6.39  | 1.66E-02 | 17.10  | 7.88  | 3.01E-02 | 21.07  | 17.61  | 2.31E-01 | -12.08 | 26.04  | 6.43E-01 | 13.34  | 16.36  | 4.15E-01 |
| cg23916044 | 15.09  | 6.30  | 1.66E-02 | 13.62  | 8.75  | 1.20E-01 | 15.40  | 13.46  | 2.53E-01 | 6.33   | 19.32  | 7.43E-01 | 25.52  | 15.94  | 1.09E-01 |
| cg03559064 | -12.69 | 5.30  | 1.66E-02 | 5.03   | 14.56 | 7.30E-01 | -18.26 | 30.58  | 5.50E-01 | -13.51 | 6.13   | 2.77E-02 | -29.76 | 17.49  | 8.88E-02 |
| cg19049152 | -11.96 | 4.99  | 1.66E-02 | -9.87  | 6.80  | 1.47E-01 | -4.83  | 11.43  | 6.72E-01 | -33.10 | 21.88  | 1.30E-01 | -18.37 | 10.72  | 8.67E-02 |
| cg11348599 | -12.73 | 5.32  | 1.66E-02 | -13.01 | 15.96 | 4.15E-01 | -8.61  | 29.63  | 7.71E-01 | -13.89 | 5.95   | 1.95E-02 | 1.61   | 22.22  | 9.42E-01 |
| cg15453345 | 32.53  | 13.58 | 1.66E-02 | 26.54  | 15.21 | 8.10E-02 | 40.51  | 75.05  | 5.89E-01 | -26.79 | 80.68  | 7.40E-01 | 76.29  | 36.10  | 3.46E-02 |
| cg09684160 | -9.66  | 4.03  | 1.66E-02 | -10.09 | 5.44  | 6.33E-02 | -9.67  | 10.04  | 3.35E-01 | -11.90 | 10.46  | 2.56E-01 | -5.54  | 10.79  | 6.07E-01 |
| cg07743231 | 9.27   | 3.87  | 1.66E-02 | 12.00  | 6.76  | 7.58E-02 | 11.15  | 7.69   | 1.47E-01 | 2.18   | 8.01   | 7.85E-01 | 10.75  | 8.97   | 2.31E-01 |
| cg05233899 | -6.60  | 2.76  | 1.66E-02 | -2.94  | 4.31  | 4.95E-01 | -6.35  | 5.60   | 2.57E-01 | -11.41 | 6.98   | 1.02E-01 | -10.79 | 6.28   | 8.56E-02 |
| cg26768918 | 41.77  | 17.44 | 1.66E-02 | 32.95  | 21.54 | 1.26E-01 | 12.40  | 93.07  | 8.94E-01 | 74.69  | 46.12  | 1.05E-01 | 54.44  | 42.79  | 2.03E-01 |
| cg25512903 | -39.00 | 16.29 | 1.66E-02 | -49.22 | 24.64 | 4.58E-02 | -30.12 | 46.79  | 5.20E-01 | -5.77  | 38.38  | 8.80E-01 | -48.92 | 31.83  | 1.24E-01 |
| cg03366858 | 18.58  | 7.76  | 1.66E-02 | 14.50  | 9.22  | 1.16E-01 | 74.86  | 37.58  | 4.63E-02 | 20.22  | 35.19  | 5.65E-01 | 20.66  | 17.34  | 2.34E-01 |
| cg07702750 | 23.10  | 9.65  | 1.66E-02 | 19.70  | 26.97 | 4.65E-01 | 18.90  | 57.90  | 7.44E-01 | 19.74  | 11.34  | 8.16E-02 | 47.97  | 27.85  | 8.50E-02 |
| cg26192857 | 50.94  | 21.28 | 1.67E-02 | 60.28  | 26.69 | 2.39E-02 | 46.12  | 77.12  | 5.50E-01 | 75.37  | 63.57  | 2.36E-01 | 3.92   | 50.62  | 9.38E-01 |
| cg08977702 | -11.30 | 4.72  | 1.67E-02 | -32.83 | 14.16 | 2.05E-02 | -0.51  | 30.74  | 9.87E-01 | -8.42  | 5.31   | 1.13E-01 | -13.13 | 17.19  | 4.45E-01 |
| cg24059694 | -32.43 | 13.54 | 1.67E-02 | -59.50 | 23.11 | 1.00E-02 | 42.04  | 47.40  | 3.75E-01 | -26.86 | 10.94  | 1.41E-02 | -44.57 | 30.34  | 1.42E-01 |
| cg21205978 | -15.38 | 6.42  | 1.67E-02 | -10.53 | 8.23  | 2.01E-01 | -34.87 | 15.60  | 2.54E-02 | 5.69   | 28.43  | 8.41E-01 | -19.64 | 15.57  | 2.07E-01 |
| cg20248516 | 14.72  | 6.15  | 1.67E-02 | 21.36  | 9.95  | 3.18E-02 | 15.22  | 13.87  | 2.73E-01 | 21.41  | 14.84  | 1.49E-01 | -0.41  | 12.29  | 9.73E-01 |
| cg04405075 | -15.96 | 6.67  | 1.67E-02 | -14.93 | 11.71 | 2.02E-01 | 3.34   | 14.96  | 8.24E-01 | -28.91 | 14.88  | 5.21E-02 | -21.63 | 12.68  | 8.80E-02 |



|            |        |       |          |        |       |          |         |        |          |         |       |          |        |       |          |
|------------|--------|-------|----------|--------|-------|----------|---------|--------|----------|---------|-------|----------|--------|-------|----------|
| cg11576513 | 23.70  | 9.90  | 1.67E-02 | 9.16   | 15.60 | 5.57E-01 | -0.36   | 46.99  | 9.94E-01 | 32.87   | 15.10 | 2.95E-02 | 47.83  | 28.17 | 8.95E-02 |
| cg27509823 | 5.12   | 2.14  | 1.67E-02 | 2.20   | 3.69  | 5.51E-01 | 2.49    | 4.51   | 5.81E-01 | 8.20    | 3.61  | 2.31E-02 | 10.53  | 7.13  | 1.39E-01 |
| cg12329318 | -13.07 | 5.46  | 1.67E-02 | -17.39 | 14.99 | 2.46E-01 | -22.29  | 25.54  | 3.83E-01 | -13.58  | 6.33  | 3.18E-02 | 4.81   | 19.69 | 8.07E-01 |
| cg12886494 | -12.76 | 5.33  | 1.67E-02 | -14.83 | 10.86 | 1.72E-01 | -8.27   | 13.74  | 5.47E-01 | -11.49  | 7.77  | 1.39E-01 | -18.37 | 14.34 | 2.00E-01 |
| cg08144588 | -4.56  | 1.91  | 1.67E-02 | -5.32  | 2.68  | 4.72E-02 | -1.78   | 4.41   | 6.87E-01 | -8.89   | 8.04  | 2.69E-01 | -4.14  | 3.80  | 2.76E-01 |
| cg18975659 | -13.38 | 5.59  | 1.67E-02 | -17.64 | 11.33 | 1.19E-01 | -5.04   | 14.53  | 7.29E-01 | -13.02  | 9.42  | 1.67E-01 | -14.64 | 11.05 | 1.85E-01 |
| cg23216122 | 20.26  | 8.46  | 1.67E-02 | 14.64  | 18.02 | 4.16E-01 | 24.46   | 17.20  | 1.55E-01 | 16.95   | 12.90 | 1.89E-01 | 35.72  | 25.92 | 1.68E-01 |
| cg19035993 | 21.18  | 8.85  | 1.67E-02 | 22.50  | 23.03 | 3.29E-01 | 27.41   | 34.64  | 4.29E-01 | 14.46   | 10.61 | 1.73E-01 | 65.71  | 29.27 | 2.47E-02 |
| cg20724476 | -8.45  | 3.53  | 1.67E-02 | -14.72 | 5.36  | 6.00E-03 | -5.18   | 7.82   | 5.08E-01 | -5.45   | 9.84  | 5.79E-01 | -1.29  | 7.30  | 8.59E-01 |
| cg05952666 | 27.62  | 11.54 | 1.67E-02 | 30.60  | 23.84 | 1.99E-01 | -41.67  | 133.40 | 7.55E-01 | 24.40   | 14.17 | 8.50E-02 | 48.19  | 37.45 | 1.98E-01 |
| cg20618826 | -14.97 | 6.26  | 1.67E-02 | -18.90 | 8.91  | 3.39E-02 | -15.38  | 14.52  | 2.89E-01 | -8.84   | 16.23 | 5.86E-01 | -8.60  | 15.07 | 5.68E-01 |
| cg10992219 | 13.13  | 5.49  | 1.67E-02 | 17.70  | 10.79 | 1.01E-01 | 6.93    | 14.37  | 6.29E-01 | 16.28   | 8.23  | 4.78E-02 | 2.01   | 14.12 | 8.87E-01 |
| cg14785449 | -35.31 | 14.75 | 1.67E-02 | -88.95 | 51.16 | 8.21E-02 | -139.12 | 175.89 | 4.29E-01 | -24.13  | 16.35 | 1.40E-01 | -76.43 | 47.80 | 1.10E-01 |
| cg12894142 | 15.73  | 6.57  | 1.67E-02 | 26.03  | 12.56 | 3.83E-02 | -7.92   | 21.19  | 7.09E-01 | 17.41   | 9.20  | 5.83E-02 | 3.94   | 19.06 | 8.36E-01 |
| cg25178798 | -20.61 | 8.61  | 1.67E-02 | -63.96 | 30.75 | 3.76E-02 | 45.69   | 131.08 | 7.27E-01 | -16.89  | 9.36  | 7.11E-02 | -21.11 | 32.40 | 5.15E-01 |
| cg26895571 | 24.33  | 10.17 | 1.67E-02 | 28.55  | 19.84 | 1.50E-01 | 23.32   | 22.36  | 2.97E-01 | 15.51   | 16.93 | 3.60E-01 | 37.80  | 24.69 | 1.26E-01 |
| cg11050601 | 35.55  | 14.86 | 1.67E-02 | 10.38  | 51.91 | 8.41E-01 | 48.34   | 43.50  | 2.66E-01 | 37.14   | 17.19 | 3.07E-02 | 24.14  | 63.93 | 7.06E-01 |
| cg02382400 | 11.00  | 4.60  | 1.67E-02 | 4.50   | 7.16  | 5.30E-01 | 10.21   | 8.36   | 2.22E-01 | 14.76   | 14.91 | 3.22E-01 | 24.53  | 10.56 | 2.02E-02 |
| cg00653790 | 10.12  | 4.23  | 1.67E-02 | 3.63   | 4.66  | 4.36E-01 | 8.50    | 7.19   | 2.38E-01 | 24.53   | 8.03  | 2.26E-03 | 9.66   | 6.81  | 1.56E-01 |
| cg14505299 | -19.16 | 8.01  | 1.67E-02 | -36.11 | 12.52 | 3.94E-03 | -8.96   | 17.75  | 6.14E-01 | -4.47   | 12.02 | 7.10E-01 | -25.77 | 16.00 | 1.07E-01 |
| cg23752963 | 44.77  | 18.71 | 1.67E-02 | 50.91  | 25.72 | 4.78E-02 | -3.15   | 76.58  | 9.67E-01 | -2.01   | 46.08 | 9.65E-01 | 74.50  | 37.70 | 4.81E-02 |
| cg03742214 | 42.37  | 17.70 | 1.67E-02 | 33.97  | 67.38 | 6.14E-01 | -128.17 | 261.78 | 6.24E-01 | 51.31   | 19.04 | 7.03E-03 | -61.61 | 71.48 | 3.89E-01 |
| cg05821464 | -14.42 | 6.02  | 1.67E-02 | -24.79 | 9.50  | 9.07E-03 | -6.59   | 12.57  | 6.00E-01 | -13.29  | 16.45 | 4.19E-01 | -4.92  | 12.45 | 6.93E-01 |
| cg25516823 | 22.77  | 9.51  | 1.67E-02 | 41.62  | 18.06 | 2.12E-02 | -1.70   | 37.42  | 9.64E-01 | 24.84   | 10.39 | 1.68E-02 | -13.71 | 27.06 | 6.12E-01 |
| cg09219521 | 26.91  | 11.24 | 1.67E-02 | 37.20  | 16.20 | 2.17E-02 | 5.46    | 36.99  | 8.83E-01 | 47.36   | 26.85 | 7.78E-02 | 0.71   | 22.46 | 9.75E-01 |
| cg10831684 | -43.79 | 18.30 | 1.67E-02 | -31.51 | 29.98 | 2.93E-01 | -28.28  | 97.36  | 7.71E-01 | -78.35  | 31.50 | 1.29E-02 | -18.09 | 36.27 | 6.18E-01 |
| cg08167110 | -9.22  | 3.85  | 1.67E-02 | -14.94 | 5.78  | 9.74E-03 | -12.60  | 9.91   | 2.04E-01 | -0.15   | 9.44  | 9.87E-01 | -2.73  | 7.91  | 7.30E-01 |
| cg07537734 | 20.85  | 8.72  | 1.67E-02 | 27.60  | 10.96 | 1.18E-02 | -3.17   | 25.25  | 9.00E-01 | 53.66   | 28.31 | 5.81E-02 | 8.47   | 15.06 | 5.74E-01 |
| cg03086003 | -9.57  | 4.00  | 1.67E-02 | -15.96 | 7.48  | 3.29E-02 | -7.27   | 8.73   | 4.05E-01 | -5.72   | 6.82  | 4.01E-01 | -9.47  | 10.01 | 3.44E-01 |
| cg06191390 | 14.18  | 5.92  | 1.67E-02 | 23.00  | 9.94  | 2.06E-02 | 13.76   | 15.40  | 3.72E-01 | 17.32   | 9.45  | 6.69E-02 | -5.96  | 13.12 | 6.50E-01 |
| cg04708313 | 17.71  | 7.40  | 1.67E-02 | 18.82  | 15.40 | 2.22E-01 | -8.78   | 19.85  | 6.58E-01 | 20.48   | 10.72 | 5.60E-02 | 31.44  | 18.91 | 9.63E-02 |
| cg12117227 | -13.95 | 5.83  | 1.67E-02 | -26.08 | 9.24  | 4.78E-03 | -10.89  | 13.45  | 4.18E-01 | -1.60   | 11.33 | 8.88E-01 | -9.11  | 13.57 | 5.02E-01 |
| cg24586685 | -9.30  | 3.89  | 1.67E-02 | -19.41 | 6.68  | 3.67E-03 | -5.03   | 10.26  | 6.24E-01 | -4.31   | 5.12  | 4.01E-01 | -8.35  | 10.12 | 4.09E-01 |
| cg27053785 | -87.18 | 36.44 | 1.67E-02 | -77.36 | 48.64 | 1.12E-01 | 188.95  | 217.74 | 3.86E-01 | -178.88 | 82.92 | 3.10E-02 | -66.65 | 78.10 | 3.93E-01 |
| cg14741685 | -32.70 | 13.67 | 1.67E-02 | -5.36  | 39.83 | 8.93E-01 | -212.40 | 134.88 | 1.15E-01 | -35.54  | 15.38 | 2.09E-02 | -22.24 | 47.58 | 6.40E-01 |

|            |        |       |          |        |       |          |         |        |          |        |       |          |         |       |          |
|------------|--------|-------|----------|--------|-------|----------|---------|--------|----------|--------|-------|----------|---------|-------|----------|
| cg18924229 | 4.20   | 1.76  | 1.67E-02 | 6.13   | 3.01  | 4.12E-02 | 1.58    | 4.46   | 7.22E-01 | 3.20   | 2.77  | 2.47E-01 | 5.68    | 5.54  | 3.06E-01 |
| cg00479463 | -7.53  | 3.15  | 1.67E-02 | -9.36  | 4.26  | 2.79E-02 | -3.36   | 7.12   | 6.37E-01 | -11.02 | 10.46 | 2.92E-01 | -4.53   | 7.73  | 5.58E-01 |
| cg17580416 | -20.09 | 8.40  | 1.67E-02 | -27.31 | 14.57 | 6.08E-02 | -6.40   | 16.64  | 7.01E-01 | -5.36  | 18.53 | 7.73E-01 | -39.96  | 18.45 | 3.03E-02 |
| cg13930557 | 14.72  | 6.15  | 1.68E-02 | 17.74  | 9.61  | 6.50E-02 | 16.93   | 10.90  | 1.20E-01 | 6.69   | 18.24 | 7.14E-01 | 8.21    | 15.51 | 5.97E-01 |
| cg02387368 | 11.83  | 4.95  | 1.68E-02 | 11.66  | 6.96  | 9.40E-02 | 19.07   | 10.56  | 7.10E-02 | 6.17   | 15.46 | 6.90E-01 | 6.52    | 11.88 | 5.83E-01 |
| cg09596674 | 9.57   | 4.00  | 1.68E-02 | 14.50  | 5.87  | 1.35E-02 | 5.63    | 9.78   | 5.65E-01 | 9.65   | 10.76 | 3.70E-01 | 2.41    | 8.36  | 7.73E-01 |
| cg20799547 | -37.44 | 15.65 | 1.68E-02 | -21.59 | 37.72 | 5.67E-01 | -175.91 | 194.33 | 3.65E-01 | -35.38 | 18.09 | 5.05E-02 | -83.71  | 57.98 | 1.49E-01 |
| cg08852641 | -8.53  | 3.56  | 1.68E-02 | -8.75  | 4.79  | 6.77E-02 | 0.10    | 6.21   | 9.87E-01 | -15.96 | 10.84 | 1.41E-01 | -16.30  | 7.54  | 3.06E-02 |
| cg21325475 | -16.15 | 6.75  | 1.68E-02 | -31.91 | 15.93 | 4.52E-02 | -1.29   | 19.76  | 9.48E-01 | -17.53 | 8.86  | 4.80E-02 | -0.86   | 19.18 | 9.64E-01 |
| cg14758525 | -9.75  | 4.07  | 1.68E-02 | -4.77  | 5.79  | 4.09E-01 | -17.65  | 8.13   | 2.99E-02 | -5.19  | 14.35 | 7.18E-01 | -14.67  | 9.82  | 1.35E-01 |
| cg14063129 | 21.42  | 8.95  | 1.68E-02 | 23.95  | 18.39 | 1.93E-01 | 10.49   | 20.43  | 6.08E-01 | 23.28  | 12.81 | 6.92E-02 | 28.56   | 31.21 | 3.60E-01 |
| cg24543696 | 18.40  | 7.69  | 1.68E-02 | 17.19  | 15.05 | 2.53E-01 | 29.14   | 20.24  | 1.50E-01 | 15.36  | 11.93 | 1.98E-01 | 18.58   | 18.20 | 3.07E-01 |
| cg23366861 | 22.02  | 9.21  | 1.68E-02 | 52.27  | 19.80 | 8.29E-03 | 0.50    | 78.31  | 9.95E-01 | 14.06  | 10.98 | 2.00E-01 | 13.06   | 32.80 | 6.91E-01 |
| cg23893802 | 54.44  | 22.76 | 1.68E-02 | 67.20  | 51.56 | 1.92E-01 | 71.49   | 231.59 | 7.58E-01 | 43.05  | 27.09 | 1.12E-01 | 114.49  | 76.02 | 1.32E-01 |
| cg20934892 | 22.09  | 9.24  | 1.68E-02 | 37.59  | 19.30 | 5.14E-02 | -16.22  | 41.48  | 6.96E-01 | 17.87  | 11.74 | 1.28E-01 | 31.46   | 28.90 | 2.76E-01 |
| cg02875130 | -45.99 | 19.23 | 1.68E-02 | 14.09  | 64.73 | 8.28E-01 | -178.46 | 257.45 | 4.88E-01 | -44.78 | 21.12 | 3.40E-02 | -117.76 | 69.07 | 8.82E-02 |
| cg26895804 | 12.38  | 5.18  | 1.68E-02 | 16.70  | 7.01  | 1.73E-02 | 15.70   | 13.10  | 2.31E-01 | 13.41  | 19.37 | 4.89E-01 | -0.54   | 10.85 | 9.60E-01 |
| cg11754095 | 35.55  | 14.87 | 1.68E-02 | 45.63  | 18.75 | 1.49E-02 | 51.19   | 83.18  | 5.38E-01 | -2.52  | 75.76 | 9.73E-01 | 17.69   | 27.11 | 5.14E-01 |
| cg02231590 | -7.82  | 3.27  | 1.68E-02 | -7.69  | 4.40  | 8.07E-02 | -4.98   | 7.20   | 4.89E-01 | -20.10 | 10.42 | 5.37E-02 | -3.98   | 8.63  | 6.45E-01 |
| cg27060391 | -13.09 | 5.47  | 1.68E-02 | -19.02 | 9.23  | 3.93E-02 | 3.18    | 11.65  | 7.85E-01 | -17.62 | 11.47 | 1.24E-01 | -15.46  | 12.25 | 2.07E-01 |
| cg15059176 | -14.11 | 5.90  | 1.68E-02 | -12.47 | 9.19  | 1.75E-01 | -5.78   | 13.82  | 6.76E-01 | -24.27 | 13.74 | 7.73E-02 | -15.55  | 12.54 | 2.15E-01 |
| cg01269620 | 17.49  | 7.31  | 1.68E-02 | 26.00  | 13.18 | 4.85E-02 | 27.89   | 20.50  | 1.74E-01 | 5.76   | 13.16 | 6.62E-01 | 16.23   | 14.46 | 2.62E-01 |
| cg16674264 | -12.92 | 5.40  | 1.68E-02 | -17.81 | 9.62  | 6.42E-02 | -14.65  | 12.98  | 2.59E-01 | -6.90  | 9.03  | 4.45E-01 | -15.01  | 13.83 | 2.78E-01 |
| cg16746455 | 35.19  | 14.72 | 1.68E-02 | 38.59  | 18.23 | 3.42E-02 | 19.99   | 59.26  | 7.36E-01 | 67.62  | 67.38 | 3.16E-01 | 23.34   | 30.13 | 4.39E-01 |
| cg12623852 | 4.93   | 2.06  | 1.68E-02 | 7.73   | 3.04  | 1.11E-02 | 2.86    | 4.25   | 5.02E-01 | -2.49  | 6.24  | 6.90E-01 | 4.97    | 4.63  | 2.83E-01 |
| cg14593314 | 37.38  | 15.63 | 1.68E-02 | 35.25  | 37.39 | 3.46E-01 | 17.43   | 180.38 | 9.23E-01 | 35.03  | 18.12 | 5.31E-02 | 68.55   | 57.91 | 2.37E-01 |
| cg12030370 | 14.57  | 6.09  | 1.68E-02 | 14.80  | 11.19 | 1.86E-01 | -0.35   | 21.37  | 9.87E-01 | 19.52  | 8.43  | 2.06E-02 | 0.19    | 19.27 | 9.92E-01 |
| cg07537152 | -11.35 | 4.75  | 1.68E-02 | -18.56 | 10.20 | 6.86E-02 | -31.41  | 20.00  | 1.16E-01 | -8.51  | 6.08  | 1.61E-01 | -3.11   | 13.85 | 8.22E-01 |
| cg06515732 | 12.42  | 5.19  | 1.68E-02 | 20.46  | 13.19 | 1.21E-01 | 29.01   | 31.09  | 3.51E-01 | 11.20  | 6.00  | 6.20E-02 | 0.67    | 19.95 | 9.73E-01 |
| cg24428099 | 22.59  | 9.45  | 1.68E-02 | 15.00  | 16.95 | 3.76E-01 | 22.96   | 17.00  | 1.77E-01 | 40.68  | 19.36 | 3.56E-02 | 8.09    | 25.03 | 7.47E-01 |
| cg05192402 | -10.49 | 4.39  | 1.68E-02 | -20.39 | 9.63  | 3.43E-02 | -5.93   | 13.01  | 6.48E-01 | -5.72  | 5.87  | 3.30E-01 | -19.85  | 12.65 | 1.17E-01 |
| cg23185774 | -18.29 | 7.65  | 1.68E-02 | -21.80 | 12.06 | 7.08E-02 | -15.17  | 15.83  | 3.38E-01 | -18.14 | 19.08 | 3.42E-01 | -15.06  | 16.96 | 3.75E-01 |
| cg20464719 | 6.05   | 2.53  | 1.68E-02 | 7.46   | 3.75  | 4.67E-02 | 8.35    | 4.70   | 7.59E-02 | 3.82   | 8.31  | 6.46E-01 | -0.73   | 6.28  | 9.08E-01 |
| cg26121561 | 18.56  | 7.76  | 1.68E-02 | 19.38  | 9.36  | 3.84E-02 | -8.35   | 26.04  | 7.49E-01 | 42.10  | 44.54 | 3.45E-01 | 24.34   | 17.70 | 1.69E-01 |
| cg21497236 | 25.75  | 10.77 | 1.68E-02 | 41.36  | 19.34 | 3.24E-02 | -0.94   | 22.42  | 9.66E-01 | 23.27  | 19.71 | 2.38E-01 | 38.55   | 26.89 | 1.52E-01 |

|            |        |       |          |         |       |          |        |        |          |         |       |          |        |       |          |
|------------|--------|-------|----------|---------|-------|----------|--------|--------|----------|---------|-------|----------|--------|-------|----------|
| cg12911208 | 11.25  | 4.71  | 1.68E-02 | 24.06   | 9.97  | 1.58E-02 | 13.49  | 10.37  | 1.93E-01 | 5.33    | 6.76  | 4.30E-01 | 6.05   | 16.04 | 7.06E-01 |
| cg15920131 | -89.53 | 37.45 | 1.68E-02 | -115.09 | 53.26 | 3.07E-02 | -34.61 | 220.56 | 8.75E-01 | -137.80 | 70.67 | 5.12E-02 | 36.20  | 84.65 | 6.69E-01 |
| cg23627022 | -25.39 | 10.62 | 1.68E-02 | -0.91   | 22.99 | 9.68E-01 | -27.18 | 48.80  | 5.78E-01 | -38.55  | 12.69 | 2.38E-03 | 3.81   | 31.11 | 9.02E-01 |
| cg00171565 | -30.69 | 12.84 | 1.68E-02 | -21.62  | 15.83 | 1.72E-01 | -96.16 | 43.68  | 2.77E-02 | -43.32  | 47.33 | 3.60E-01 | -27.30 | 30.09 | 3.64E-01 |
| cg08419450 | -10.06 | 4.21  | 1.68E-02 | -15.66  | 9.35  | 9.41E-02 | -9.68  | 15.49  | 5.32E-01 | -5.08   | 4.98  | 3.08E-01 | -25.69 | 11.66 | 2.76E-02 |
| cg10293297 | 16.88  | 7.06  | 1.68E-02 | 31.33   | 16.92 | 6.40E-02 | -36.75 | 41.52  | 3.76E-01 | 14.11   | 8.18  | 8.47E-02 | 38.35  | 31.15 | 2.18E-01 |
| cg01835635 | 16.76  | 7.01  | 1.68E-02 | 20.14   | 17.09 | 2.39E-01 | 17.14  | 21.84  | 4.33E-01 | 13.59   | 8.69  | 1.18E-01 | 35.37  | 25.10 | 1.59E-01 |
| cg27360685 | 11.74  | 4.91  | 1.68E-02 | 11.38   | 6.74  | 9.13E-02 | 11.48  | 13.96  | 4.11E-01 | 39.58   | 21.32 | 6.34E-02 | 7.45   | 9.11  | 4.14E-01 |
| cg18054172 | 20.70  | 8.66  | 1.68E-02 | 30.02   | 14.83 | 4.30E-02 | 37.80  | 21.52  | 7.90E-02 | -2.19   | 15.45 | 8.87E-01 | 24.67  | 16.27 | 1.29E-01 |
| cg06951245 | 11.44  | 4.78  | 1.68E-02 | 15.15   | 7.98  | 5.75E-02 | 24.05  | 11.85  | 4.25E-02 | 3.66    | 12.14 | 7.63E-01 | 4.65   | 8.43  | 5.82E-01 |
| cg02644494 | 12.29  | 5.14  | 1.69E-02 | 12.40   | 7.81  | 1.12E-01 | 12.29  | 12.59  | 3.29E-01 | 0.27    | 17.54 | 9.88E-01 | 15.46  | 9.20  | 9.28E-02 |
| cg16199460 | -7.58  | 3.17  | 1.69E-02 | -8.34   | 5.15  | 1.05E-01 | -8.72  | 6.71   | 1.94E-01 | -10.35  | 7.31  | 1.57E-01 | -2.47  | 6.95  | 7.23E-01 |
| cg11973479 | 35.82  | 14.99 | 1.69E-02 | 43.75   | 18.29 | 1.68E-02 | 7.58   | 72.49  | 9.17E-01 | -26.79  | 49.46 | 5.88E-01 | 44.24  | 34.04 | 1.94E-01 |
| cg11539857 | -11.87 | 4.97  | 1.69E-02 | -12.59  | 7.10  | 7.64E-02 | -13.93 | 15.48  | 3.68E-01 | -8.19   | 13.03 | 5.30E-01 | -11.76 | 9.69  | 2.25E-01 |
| cg19001703 | -34.26 | 14.34 | 1.69E-02 | -28.03  | 17.10 | 1.01E-01 | -52.50 | 47.65  | 2.71E-01 | -55.20  | 71.83 | 4.42E-01 | -45.57 | 35.08 | 1.94E-01 |
| cg03166779 | 33.92  | 14.20 | 1.69E-02 | 12.50   | 19.30 | 5.17E-01 | 50.10  | 53.31  | 3.47E-01 | 48.27   | 33.69 | 1.52E-01 | 71.42  | 30.94 | 2.10E-02 |
| cg13285004 | 18.43  | 7.71  | 1.69E-02 | 25.36   | 14.58 | 8.20E-02 | 17.38  | 15.80  | 2.72E-01 | 3.31    | 13.95 | 8.12E-01 | 35.08  | 18.37 | 5.62E-02 |
| cg10758278 | -15.14 | 6.34  | 1.69E-02 | -22.05  | 12.26 | 7.20E-02 | -7.80  | 22.82  | 7.33E-01 | -12.68  | 8.60  | 1.40E-01 | -15.60 | 18.81 | 4.07E-01 |
| cg23528247 | 6.14   | 2.57  | 1.69E-02 | 5.64    | 3.60  | 1.17E-01 | 7.98   | 5.88   | 1.75E-01 | 9.23    | 6.51  | 1.56E-01 | 2.05   | 6.85  | 7.65E-01 |
| cg22241045 | -17.21 | 7.20  | 1.69E-02 | -11.96  | 19.09 | 5.31E-01 | -32.05 | 26.83  | 2.32E-01 | -17.10  | 8.51  | 4.45E-02 | -13.68 | 27.50 | 6.19E-01 |
| cg24475171 | 15.19  | 6.36  | 1.69E-02 | 13.87   | 7.65  | 6.99E-02 | 41.09  | 24.19  | 8.94E-02 | 11.75   | 24.58 | 6.33E-01 | 11.48  | 15.27 | 4.52E-01 |
| cg23555120 | 12.95  | 5.42  | 1.69E-02 | 17.77   | 8.36  | 3.35E-02 | 0.74   | 13.53  | 9.56E-01 | 17.91   | 17.05 | 2.94E-01 | 11.16  | 9.61  | 2.45E-01 |
| cg11130955 | -8.51  | 3.56  | 1.69E-02 | -13.85  | 8.56  | 1.06E-01 | -1.96  | 18.79  | 9.17E-01 | -8.10   | 4.31  | 6.00E-02 | -4.69  | 10.91 | 6.67E-01 |
| cg06821199 | 6.55   | 2.74  | 1.69E-02 | 3.85    | 4.60  | 4.03E-01 | 12.15  | 5.64   | 3.11E-02 | 2.46    | 6.79  | 7.17E-01 | 7.75   | 5.52  | 1.60E-01 |
| cg27589744 | -46.39 | 19.42 | 1.69E-02 | -56.92  | 23.91 | 1.73E-02 | 13.38  | 99.47  | 8.93E-01 | 3.41    | 45.31 | 9.40E-01 | -84.09 | 56.36 | 1.36E-01 |
| cg07226718 | -9.28  | 3.89  | 1.69E-02 | -10.95  | 5.29  | 3.86E-02 | -1.14  | 8.42   | 8.93E-01 | -9.00   | 13.68 | 5.11E-01 | -14.42 | 9.50  | 1.29E-01 |
| cg02996181 | 11.82  | 4.95  | 1.69E-02 | 7.90    | 6.94  | 2.55E-01 | 25.87  | 12.71  | 4.18E-02 | 9.36    | 11.32 | 4.08E-01 | 14.08  | 12.84 | 2.73E-01 |
| cg25090051 | 12.74  | 5.33  | 1.69E-02 | 14.82   | 8.02  | 6.46E-02 | 8.42   | 12.50  | 5.00E-01 | 13.69   | 14.14 | 3.33E-01 | 11.59  | 11.05 | 2.94E-01 |
| cg00299737 | -26.55 | 11.12 | 1.69E-02 | -19.49  | 15.55 | 2.10E-01 | -0.05  | 47.43  | 9.99E-01 | -59.62  | 29.86 | 4.59E-02 | -28.20 | 20.45 | 1.68E-01 |
| cg05365960 | -40.62 | 17.01 | 1.69E-02 | -8.29   | 41.47 | 8.42E-01 | -31.82 | 202.97 | 8.75E-01 | -49.48  | 19.74 | 1.22E-02 | -27.62 | 59.09 | 6.40E-01 |
| cg20263853 | -20.71 | 8.67  | 1.69E-02 | -29.56  | 14.69 | 4.43E-02 | -12.19 | 17.25  | 4.80E-01 | -10.77  | 18.16 | 5.53E-01 | -28.58 | 20.98 | 1.73E-01 |
| cg04001071 | 11.77  | 4.93  | 1.69E-02 | 8.96    | 10.55 | 3.95E-01 | 1.70   | 13.53  | 9.00E-01 | 16.44   | 6.57  | 1.24E-02 | 4.09   | 16.60 | 8.06E-01 |
| cg20972917 | 30.95  | 12.96 | 1.69E-02 | 28.06   | 19.69 | 1.54E-01 | 26.76  | 41.65  | 5.21E-01 | 64.95   | 32.08 | 4.29E-02 | 18.28  | 23.38 | 4.34E-01 |
| cg22588850 | -15.84 | 6.63  | 1.69E-02 | -20.48  | 10.99 | 6.24E-02 | -13.56 | 14.64  | 3.54E-01 | -6.10   | 16.39 | 7.10E-01 | -17.22 | 12.82 | 1.79E-01 |
| cg27004521 | 16.89  | 7.07  | 1.69E-02 | -2.58   | 17.97 | 8.86E-01 | 12.59  | 26.13  | 6.30E-01 | 20.52   | 8.63  | 1.74E-02 | 25.79  | 22.36 | 2.49E-01 |

|            |        |       |          |        |       |          |        |        |          |        |       |          |        |       |          |
|------------|--------|-------|----------|--------|-------|----------|--------|--------|----------|--------|-------|----------|--------|-------|----------|
| cg16875629 | 21.00  | 8.79  | 1.69E-02 | 13.78  | 17.06 | 4.19E-01 | 57.83  | 29.69  | 5.14E-02 | 13.94  | 14.97 | 3.52E-01 | 24.74  | 16.01 | 1.22E-01 |
| cg13308964 | -6.46  | 2.71  | 1.69E-02 | -1.69  | 4.09  | 6.79E-01 | -12.43 | 5.66   | 2.81E-02 | -9.93  | 7.21  | 1.68E-01 | -7.68  | 6.16  | 2.13E-01 |
| cg23296369 | -13.37 | 5.60  | 1.69E-02 | -29.53 | 16.54 | 7.42E-02 | -3.49  | 22.64  | 8.78E-01 | -11.46 | 6.41  | 7.37E-02 | -16.85 | 22.67 | 4.57E-01 |
| cg23296652 | 15.22  | 6.37  | 1.69E-02 | -8.61  | 16.97 | 6.12E-01 | 26.28  | 11.33  | 2.04E-02 | 13.02  | 8.81  | 1.39E-01 | 23.79  | 18.13 | 1.89E-01 |
| cg17018767 | -12.56 | 5.26  | 1.69E-02 | -20.20 | 7.58  | 7.70E-03 | 3.22   | 10.95  | 7.69E-01 | -17.94 | 14.27 | 2.09E-01 | -10.59 | 10.18 | 2.98E-01 |
| cg01148731 | -6.67  | 2.79  | 1.69E-02 | -9.53  | 4.01  | 1.75E-02 | 2.03   | 6.37   | 7.50E-01 | -5.41  | 10.03 | 5.89E-01 | -8.22  | 5.64  | 1.44E-01 |
| cg27428551 | 5.04   | 2.11  | 1.69E-02 | 6.06   | 3.22  | 6.00E-02 | 6.64   | 5.03   | 1.87E-01 | 2.77   | 3.73  | 4.57E-01 | 5.10   | 7.66  | 5.06E-01 |
| cg08821431 | 8.65   | 3.62  | 1.69E-02 | 8.34   | 5.69  | 1.43E-01 | 5.62   | 7.06   | 4.26E-01 | 17.26  | 13.56 | 2.03E-01 | 9.84   | 7.10  | 1.66E-01 |
| cg01595870 | -9.97  | 4.18  | 1.69E-02 | -10.16 | 6.76  | 1.33E-01 | -7.09  | 8.96   | 4.29E-01 | -1.87  | 10.58 | 8.60E-01 | -17.35 | 8.42  | 3.93E-02 |
| cg18123385 | -15.74 | 6.59  | 1.70E-02 | -19.01 | 9.53  | 4.61E-02 | -12.95 | 15.81  | 4.13E-01 | -6.88  | 18.89 | 7.16E-01 | -15.73 | 13.86 | 2.57E-01 |
| cg27338466 | -16.44 | 6.88  | 1.70E-02 | -17.13 | 12.29 | 1.63E-01 | -13.08 | 19.83  | 5.10E-01 | -11.98 | 10.29 | 2.44E-01 | -34.88 | 20.02 | 8.15E-02 |
| cg17584288 | 19.17  | 8.03  | 1.70E-02 | 18.74  | 14.20 | 1.87E-01 | 24.93  | 25.36  | 3.25E-01 | 10.80  | 12.37 | 3.83E-01 | 38.62  | 20.15 | 5.54E-02 |
| cg14709901 | -12.83 | 5.37  | 1.70E-02 | -6.59  | 8.28  | 4.26E-01 | -14.18 | 12.21  | 2.46E-01 | -10.44 | 12.69 | 4.11E-01 | -26.40 | 11.84 | 2.58E-02 |
| cg16421616 | 7.51   | 3.14  | 1.70E-02 | -0.69  | 6.49  | 9.16E-01 | 16.11  | 9.21   | 8.02E-02 | 7.74   | 4.27  | 6.95E-02 | 14.36  | 9.28  | 1.22E-01 |
| cg20022223 | -18.87 | 7.90  | 1.70E-02 | -16.04 | 10.62 | 1.31E-01 | -0.19  | 20.45  | 9.93E-01 | -21.16 | 27.30 | 4.38E-01 | -38.45 | 17.14 | 2.48E-02 |
| cg13563094 | 21.00  | 8.80  | 1.70E-02 | 17.30  | 16.80 | 3.03E-01 | 34.71  | 15.40  | 2.43E-02 | 8.44   | 18.05 | 6.40E-01 | 18.09  | 21.83 | 4.07E-01 |
| cg05225549 | 24.16  | 10.12 | 1.70E-02 | 21.62  | 13.31 | 1.04E-01 | 25.40  | 27.71  | 3.59E-01 | 78.76  | 39.07 | 4.38E-02 | 13.50  | 21.49 | 5.30E-01 |
| cg20709275 | -10.59 | 4.44  | 1.70E-02 | -15.32 | 11.72 | 1.91E-01 | -44.83 | 21.92  | 4.09E-02 | -8.65  | 5.30  | 1.03E-01 | -4.36  | 13.05 | 7.38E-01 |
| cg10012878 | 24.70  | 10.35 | 1.70E-02 | 38.75  | 20.38 | 5.72E-02 | 20.45  | 20.27  | 3.13E-01 | 23.15  | 17.66 | 1.90E-01 | 10.38  | 27.84 | 7.09E-01 |
| cg10609068 | 37.93  | 15.89 | 1.70E-02 | 0.58   | 35.68 | 9.87E-01 | -41.16 | 131.45 | 7.54E-01 | 50.39  | 19.04 | 8.13E-03 | 36.71  | 52.82 | 4.87E-01 |
| cg06363968 | -12.37 | 5.18  | 1.70E-02 | -21.06 | 7.10  | 3.01E-03 | -6.03  | 16.75  | 7.19E-01 | -9.69  | 13.12 | 4.60E-01 | -0.75  | 9.62  | 9.38E-01 |
| cg27181005 | 16.93  | 7.09  | 1.70E-02 | 25.09  | 19.22 | 1.92E-01 | -2.64  | 34.97  | 9.40E-01 | 12.69  | 5.67  | 2.52E-02 | 54.91  | 24.63 | 2.58E-02 |
| cg03387092 | -30.57 | 12.80 | 1.70E-02 | -40.08 | 18.10 | 2.68E-02 | -15.48 | 54.62  | 7.77E-01 | -34.11 | 26.40 | 1.96E-01 | -7.78  | 27.99 | 7.81E-01 |
| cg08934208 | -16.71 | 7.00  | 1.70E-02 | -26.17 | 16.88 | 1.21E-01 | -23.01 | 39.31  | 5.58E-01 | -16.42 | 8.11  | 4.30E-02 | 14.23  | 30.66 | 6.43E-01 |
| cg17161130 | 10.38  | 4.35  | 1.70E-02 | 15.42  | 9.30  | 9.73E-02 | 27.27  | 13.04  | 3.65E-02 | 6.00   | 5.95  | 3.13E-01 | 5.68   | 11.78 | 6.30E-01 |
| cg23591152 | 25.13  | 10.53 | 1.70E-02 | 39.68  | 19.20 | 3.88E-02 | 21.75  | 22.39  | 3.31E-01 | 19.24  | 18.22 | 2.91E-01 | 13.65  | 27.72 | 6.22E-01 |
| cg02450742 | -24.96 | 10.46 | 1.70E-02 | 23.79  | 44.58 | 5.94E-01 | 20.98  | 197.19 | 9.15E-01 | -28.35 | 11.03 | 1.02E-02 | -19.63 | 50.05 | 6.95E-01 |
| cg25007705 | 8.37   | 3.51  | 1.70E-02 | 8.77   | 4.66  | 6.01E-02 | 13.45  | 8.48   | 1.13E-01 | 3.81   | 9.93  | 7.01E-01 | 4.58   | 9.44  | 6.28E-01 |
| cg26546504 | -41.59 | 17.42 | 1.70E-02 | -55.45 | 33.15 | 9.44E-02 | -81.74 | 273.05 | 7.65E-01 | -39.94 | 21.77 | 6.65E-02 | -4.39  | 62.02 | 9.44E-01 |
| cg20558112 | 11.02  | 4.62  | 1.70E-02 | 14.83  | 7.10  | 3.68E-02 | 10.80  | 10.28  | 2.93E-01 | 7.62   | 10.65 | 4.74E-01 | 6.08   | 10.63 | 5.68E-01 |
| cg23001918 | -9.23  | 3.87  | 1.70E-02 | -11.89 | 5.63  | 3.46E-02 | -4.71  | 9.66   | 6.26E-01 | -8.22  | 10.90 | 4.50E-01 | -7.56  | 7.87  | 3.37E-01 |
| cg00751288 | 49.91  | 20.91 | 1.70E-02 | 59.20  | 27.45 | 3.10E-02 | 74.46  | 77.71  | 3.38E-01 | 36.66  | 66.68 | 5.82E-01 | 26.30  | 41.94 | 5.31E-01 |
| cg14916175 | 8.43   | 3.53  | 1.70E-02 | 12.64  | 5.19  | 1.48E-02 | 11.96  | 7.60   | 1.16E-01 | -0.23  | 11.93 | 9.84E-01 | 0.03   | 7.33  | 9.97E-01 |
| cg16647921 | 9.12   | 3.82  | 1.70E-02 | 15.93  | 9.84  | 1.05E-01 | 12.60  | 15.46  | 4.15E-01 | 8.01   | 4.99  | 1.08E-01 | 6.20   | 8.54  | 4.68E-01 |
| cg25048344 | 17.64  | 7.39  | 1.70E-02 | 45.90  | 17.06 | 7.14E-03 | 18.31  | 24.71  | 4.59E-01 | 10.26  | 8.48  | 2.26E-01 | 13.38  | 13.28 | 3.14E-01 |

|            |        |       |          |        |       |          |         |        |          |        |       |          |        |       |          |
|------------|--------|-------|----------|--------|-------|----------|---------|--------|----------|--------|-------|----------|--------|-------|----------|
| cg09918512 | 17.03  | 7.14  | 1.70E-02 | 14.81  | 21.26 | 4.86E-01 | 32.87   | 63.60  | 6.05E-01 | 15.72  | 7.82  | 4.43E-02 | 44.79  | 35.20 | 2.03E-01 |
| cg14833621 | 13.98  | 5.86  | 1.70E-02 | 15.69  | 11.17 | 1.60E-01 | -2.47   | 21.10  | 9.07E-01 | 14.74  | 7.85  | 6.03E-02 | 18.10  | 19.47 | 3.52E-01 |
| cg17507897 | -11.63 | 4.87  | 1.70E-02 | -9.03  | 9.62  | 3.48E-01 | -11.32  | 12.23  | 3.55E-01 | -9.92  | 7.54  | 1.88E-01 | -20.14 | 11.91 | 9.08E-02 |
| cg03564793 | 27.40  | 11.48 | 1.70E-02 | 23.17  | 13.45 | 8.50E-02 | 40.36   | 19.65  | 4.00E-02 | 64.92  | 25.50 | 1.09E-02 | 3.39   | 15.07 | 8.22E-01 |
| cg07027513 | 26.10  | 10.94 | 1.70E-02 | 32.76  | 15.69 | 3.68E-02 | 18.07   | 32.76  | 5.81E-01 | 72.63  | 39.46 | 6.57E-02 | 7.93   | 19.16 | 6.79E-01 |
| cg10473842 | 15.79  | 6.62  | 1.70E-02 | 4.26   | 11.45 | 7.10E-01 | 24.78   | 13.39  | 6.42E-02 | 23.07  | 13.12 | 7.88E-02 | 14.61  | 16.15 | 3.66E-01 |
| cg15636365 | -54.15 | 22.70 | 1.70E-02 | -23.17 | 59.46 | 6.97E-01 | -479.01 | 265.35 | 7.10E-02 | -52.96 | 26.09 | 4.24E-02 | -79.71 | 75.51 | 2.91E-01 |
| cg19648552 | -13.47 | 5.65  | 1.70E-02 | -16.12 | 8.82  | 6.76E-02 | -9.66   | 11.89  | 4.16E-01 | -22.78 | 13.53 | 9.22E-02 | -3.76  | 12.94 | 7.71E-01 |
| cg07152177 | -41.49 | 17.39 | 1.70E-02 | -34.08 | 47.90 | 4.77E-01 | -42.17  | 174.74 | 8.09E-01 | -53.35 | 19.84 | 7.17E-03 | 48.79  | 57.91 | 4.00E-01 |
| cg12492885 | 9.02   | 3.78  | 1.70E-02 | 6.10   | 6.20  | 3.25E-01 | 12.57   | 7.80   | 1.07E-01 | 10.51  | 9.39  | 2.63E-01 | 9.08   | 7.87  | 2.49E-01 |
| cg25198847 | 5.58   | 2.34  | 1.70E-02 | 6.62   | 3.14  | 3.51E-02 | 8.76    | 5.64   | 1.20E-01 | -1.07  | 6.17  | 8.62E-01 | 4.30   | 6.49  | 5.08E-01 |
| cg19559587 | -14.66 | 6.15  | 1.70E-02 | -23.36 | 9.96  | 1.90E-02 | 5.71    | 15.20  | 7.07E-01 | -17.04 | 12.66 | 1.79E-01 | -12.22 | 13.11 | 3.51E-01 |
| cg24536827 | -9.35  | 3.92  | 1.71E-02 | -2.89  | 9.11  | 7.51E-01 | -17.61  | 17.65  | 3.18E-01 | -7.74  | 4.87  | 1.12E-01 | -24.92 | 11.42 | 2.90E-02 |
| cg13255542 | 6.16   | 2.58  | 1.71E-02 | 5.18   | 3.50  | 1.39E-01 | 13.13   | 6.91   | 5.74E-02 | 9.86   | 5.21  | 5.82E-02 | -1.61  | 6.09  | 7.92E-01 |
| cg02700498 | -26.93 | 11.29 | 1.71E-02 | -20.04 | 14.10 | 1.55E-01 | -45.96  | 41.39  | 2.67E-01 | -38.41 | 58.90 | 5.14E-01 | -37.34 | 22.67 | 9.96E-02 |
| cg14908653 | -6.02  | 2.53  | 1.71E-02 | -6.80  | 4.28  | 1.12E-01 | 3.21    | 6.30   | 6.11E-01 | -7.15  | 4.64  | 1.23E-01 | -10.52 | 5.72  | 6.58E-02 |
| cg22865058 | 25.61  | 10.74 | 1.71E-02 | 10.01  | 33.39 | 7.64E-01 | 87.74   | 80.53  | 2.76E-01 | 24.32  | 12.15 | 4.53E-02 | 41.09  | 34.30 | 2.31E-01 |
| cg00946032 | 40.44  | 16.95 | 1.71E-02 | 48.78  | 21.58 | 2.38E-02 | 62.00   | 94.24  | 5.11E-01 | -4.32  | 52.23 | 9.34E-01 | 35.82  | 34.21 | 2.95E-01 |
| cg21099123 | 31.51  | 13.21 | 1.71E-02 | 21.36  | 17.63 | 2.26E-01 | 22.10   | 49.88  | 6.58E-01 | 28.45  | 44.65 | 5.24E-01 | 55.09  | 24.92 | 2.71E-02 |
| cg05189242 | 17.90  | 7.50  | 1.71E-02 | 25.92  | 14.09 | 6.57E-02 | 1.06    | 21.72  | 9.61E-01 | 27.45  | 15.42 | 7.50E-02 | 10.87  | 12.50 | 3.85E-01 |
| cg01435791 | 11.48  | 4.81  | 1.71E-02 | 3.72   | 7.69  | 6.28E-01 | 14.82   | 9.09   | 1.03E-01 | 12.22  | 14.80 | 4.09E-01 | 20.66  | 10.23 | 4.35E-02 |
| cg06434997 | -28.90 | 12.12 | 1.71E-02 | -20.41 | 40.57 | 6.15E-01 | 210.37  | 140.30 | 1.34E-01 | -31.13 | 13.00 | 1.67E-02 | -37.27 | 41.43 | 3.68E-01 |
| cg26992245 | -8.43  | 3.54  | 1.71E-02 | -10.97 | 7.19  | 1.27E-01 | -13.65  | 14.79  | 3.56E-01 | -5.83  | 4.75  | 2.20E-01 | -12.06 | 9.24  | 1.92E-01 |
| cg00971613 | 14.69  | 6.16  | 1.71E-02 | 26.70  | 12.54 | 3.32E-02 | -1.00   | 19.83  | 9.60E-01 | 14.15  | 8.28  | 8.75E-02 | 4.67   | 18.71 | 8.03E-01 |
| cg05472468 | 26.53  | 11.13 | 1.71E-02 | 34.02  | 23.49 | 1.47E-01 | 55.15   | 45.80  | 2.29E-01 | 20.02  | 15.91 | 2.08E-01 | 25.74  | 23.33 | 2.70E-01 |
| cg24256786 | -9.53  | 3.99  | 1.71E-02 | -20.83 | 11.13 | 6.13E-02 | -3.73   | 18.95  | 8.44E-01 | -8.27  | 4.64  | 7.49E-02 | -6.44  | 13.62 | 6.36E-01 |
| cg21068013 | -12.72 | 5.33  | 1.71E-02 | -20.03 | 7.70  | 9.33E-03 | -2.20   | 10.76  | 8.38E-01 | -3.84  | 17.28 | 8.24E-01 | -12.30 | 12.56 | 3.28E-01 |
| cg25436126 | -16.56 | 6.94  | 1.71E-02 | -15.47 | 18.52 | 4.04E-01 | -2.30   | 40.28  | 9.54E-01 | -16.07 | 8.08  | 4.68E-02 | -26.65 | 22.86 | 2.44E-01 |
| cg24718866 | 22.17  | 9.30  | 1.71E-02 | 46.91  | 24.40 | 5.45E-02 | -58.50  | 111.83 | 6.01E-01 | 15.29  | 10.63 | 1.50E-01 | 48.89  | 32.22 | 1.29E-01 |
| cg17834768 | 9.20   | 3.86  | 1.71E-02 | 6.35   | 5.26  | 2.27E-01 | 15.06   | 9.42   | 1.10E-01 | 20.62  | 14.56 | 1.57E-01 | 8.08   | 8.17  | 3.22E-01 |
| cg14524956 | -12.84 | 5.39  | 1.71E-02 | -6.11  | 8.31  | 4.62E-01 | -11.50  | 13.17  | 3.83E-01 | -19.65 | 12.82 | 1.25E-01 | -20.65 | 11.07 | 6.21E-02 |
| cg05223210 | -13.36 | 5.60  | 1.71E-02 | -20.55 | 8.35  | 1.39E-02 | -8.50   | 13.59  | 5.32E-01 | -6.29  | 15.81 | 6.91E-01 | -7.38  | 11.10 | 5.06E-01 |
| cg21846461 | -20.00 | 8.39  | 1.71E-02 | -28.61 | 16.28 | 7.88E-02 | -16.35  | 20.86  | 4.33E-01 | -16.00 | 13.25 | 2.27E-01 | -19.46 | 20.21 | 3.36E-01 |
| cg13266327 | 7.70   | 3.23  | 1.71E-02 | 5.77   | 4.53  | 2.02E-01 | 14.40   | 8.30   | 8.28E-02 | 10.32  | 11.03 | 3.50E-01 | 6.67   | 6.39  | 2.97E-01 |
| cg13328209 | -22.12 | 9.28  | 1.71E-02 | -17.43 | 14.48 | 2.29E-01 | -8.90   | 30.46  | 7.70E-01 | -33.79 | 19.33 | 8.06E-02 | -23.87 | 17.98 | 1.84E-01 |

|            |        |       |          |        |       |          |        |        |          |        |        |          |        |       |          |
|------------|--------|-------|----------|--------|-------|----------|--------|--------|----------|--------|--------|----------|--------|-------|----------|
| cg19634332 | -69.36 | 29.09 | 1.71E-02 | -26.42 | 74.14 | 7.22E-01 | -22.39 | 257.50 | 9.31E-01 | -80.00 | 34.74  | 2.13E-02 | -67.49 | 80.12 | 4.00E-01 |
| cg08563994 | 36.98  | 15.51 | 1.71E-02 | -2.47  | 28.45 | 9.31E-01 | 17.19  | 82.04  | 8.34E-01 | 49.59  | 17.58  | 4.78E-03 | 83.50  | 55.20 | 1.30E-01 |
| cg16303923 | -10.88 | 4.57  | 1.71E-02 | -13.43 | 9.20  | 1.44E-01 | 2.44   | 17.22  | 8.87E-01 | -7.65  | 6.25   | 2.21E-01 | -24.50 | 11.81 | 3.80E-02 |
| cg14124310 | -8.63  | 3.62  | 1.71E-02 | -13.08 | 5.38  | 1.50E-02 | 0.82   | 9.08   | 9.28E-01 | -9.40  | 10.50  | 3.71E-01 | -6.39  | 6.99  | 3.61E-01 |
| cg24457897 | 42.53  | 17.84 | 1.71E-02 | 41.94  | 21.12 | 4.70E-02 | 141.95 | 98.26  | 1.49E-01 | 60.00  | 77.34  | 4.38E-01 | 23.61  | 39.88 | 5.54E-01 |
| cg00449821 | 15.07  | 6.32  | 1.71E-02 | 19.04  | 20.03 | 3.42E-01 | -32.09 | 93.95  | 7.33E-01 | 16.38  | 6.91   | 1.78E-02 | -6.34  | 25.88 | 8.06E-01 |
| cg09575189 | -21.13 | 8.87  | 1.71E-02 | -28.17 | 15.01 | 6.05E-02 | -11.08 | 24.16  | 6.46E-01 | -37.70 | 16.73  | 2.42E-02 | 1.73   | 17.71 | 9.22E-01 |
| cg23704195 | -6.18  | 2.59  | 1.71E-02 | -7.18  | 3.68  | 5.07E-02 | -2.77  | 5.29   | 6.01E-01 | 4.53   | 12.97  | 7.27E-01 | -9.54  | 5.49  | 8.26E-02 |
| cg09404516 | 9.37   | 3.93  | 1.71E-02 | 13.40  | 5.49  | 1.46E-02 | 16.75  | 10.52  | 1.12E-01 | -0.33  | 8.92   | 9.70E-01 | 1.43   | 10.08 | 8.87E-01 |
| cg10314052 | -21.92 | 9.20  | 1.71E-02 | -25.20 | 12.80 | 4.90E-02 | 26.17  | 41.37  | 5.27E-01 | -13.77 | 23.41  | 5.56E-01 | -28.85 | 17.37 | 9.68E-02 |
| cg27175475 | 48.17  | 20.21 | 1.71E-02 | 48.51  | 24.20 | 4.50E-02 | -94.82 | 133.51 | 4.78E-01 | 54.31  | 100.50 | 5.89E-01 | 59.86  | 41.33 | 1.48E-01 |
| cg27108362 | 25.83  | 10.84 | 1.71E-02 | 17.41  | 32.39 | 5.91E-01 | -78.88 | 90.20  | 3.82E-01 | 25.03  | 12.21  | 4.04E-02 | 61.93  | 37.04 | 9.45E-02 |
| cg02146933 | -13.41 | 5.63  | 1.72E-02 | -15.21 | 14.29 | 2.87E-01 | -14.28 | 28.79  | 6.20E-01 | -11.86 | 6.62   | 7.32E-02 | -22.98 | 19.36 | 2.35E-01 |
| cg27357181 | 19.79  | 8.30  | 1.72E-02 | -11.27 | 23.12 | 6.26E-01 | 26.48  | 78.68  | 7.36E-01 | 22.51  | 9.31   | 1.56E-02 | 47.79  | 33.00 | 1.48E-01 |
| cg18327586 | 9.43   | 3.96  | 1.72E-02 | 4.94   | 5.31  | 3.52E-01 | 15.75  | 8.42   | 6.13E-02 | 18.17  | 14.23  | 2.02E-01 | 12.27  | 10.32 | 2.34E-01 |
| cg00778084 | -8.55  | 3.59  | 1.72E-02 | -4.75  | 7.08  | 5.03E-01 | -5.25  | 11.70  | 6.54E-01 | -12.22 | 5.08   | 1.61E-02 | -4.91  | 9.28  | 5.97E-01 |
| cg07423198 | 23.85  | 10.01 | 1.72E-02 | 21.65  | 19.51 | 2.67E-01 | 11.40  | 110.97 | 9.18E-01 | 25.83  | 12.38  | 3.70E-02 | 15.75  | 36.41 | 6.65E-01 |
| cg14320054 | 27.96  | 11.73 | 1.72E-02 | 55.59  | 31.89 | 8.13E-02 | 45.25  | 70.64  | 5.22E-01 | 21.03  | 14.33  | 1.42E-01 | 30.54  | 28.76 | 2.88E-01 |
| cg00414835 | 13.05  | 5.47  | 1.72E-02 | 3.45   | 7.11  | 6.28E-01 | 23.48  | 12.08  | 5.20E-02 | 29.23  | 16.91  | 8.38E-02 | 15.36  | 9.27  | 9.75E-02 |
| cg22996783 | -12.37 | 5.19  | 1.72E-02 | -18.54 | 8.21  | 2.39E-02 | 3.74   | 12.26  | 7.60E-01 | -9.62  | 13.88  | 4.88E-01 | -15.24 | 9.79  | 1.20E-01 |
| cg25969983 | 23.04  | 9.67  | 1.72E-02 | 2.72   | 22.74 | 9.05E-01 | 20.87  | 24.52  | 3.95E-01 | 34.57  | 10.56  | 1.06E-03 | -14.36 | 32.14 | 6.55E-01 |
| cg22307058 | 6.29   | 2.64  | 1.72E-02 | -2.00  | 9.89  | 8.40E-01 | 5.56   | 4.10   | 1.75E-01 | -5.30  | 19.85  | 7.90E-01 | 8.51   | 3.75  | 2.32E-02 |
| cg08962305 | -9.98  | 4.19  | 1.72E-02 | -21.51 | 10.46 | 3.97E-02 | -10.07 | 14.43  | 4.85E-01 | -5.97  | 5.34   | 2.63E-01 | -14.37 | 11.21 | 2.00E-01 |
| cg24751773 | 6.32   | 2.65  | 1.72E-02 | 7.65   | 3.85  | 4.68E-02 | 5.37   | 5.70   | 3.46E-01 | 12.00  | 7.57   | 1.13E-01 | 0.27   | 6.16  | 9.65E-01 |
| cg19106237 | -10.77 | 4.52  | 1.72E-02 | -8.39  | 12.67 | 5.08E-01 | -16.56 | 29.73  | 5.77E-01 | -11.72 | 5.14   | 2.27E-02 | -3.49  | 16.22 | 8.30E-01 |
| cg15297650 | 13.35  | 5.60  | 1.72E-02 | 14.44  | 8.52  | 9.01E-02 | 17.48  | 13.53  | 1.97E-01 | 16.23  | 11.91  | 1.73E-01 | 2.95   | 13.41 | 8.26E-01 |
| cg13762691 | 10.67  | 4.48  | 1.72E-02 | 4.44   | 4.98  | 3.73E-01 | 17.25  | 8.81   | 5.04E-02 | 4.64   | 15.04  | 7.58E-01 | 21.57  | 9.18  | 1.88E-02 |
| cg22792367 | 11.69  | 4.91  | 1.72E-02 | 5.57   | 7.10  | 4.32E-01 | 22.62  | 9.56   | 1.80E-02 | 4.73   | 18.57  | 7.99E-01 | 14.51  | 11.29 | 1.99E-01 |
| cg15211499 | -24.42 | 10.25 | 1.72E-02 | -50.70 | 31.11 | 1.03E-01 | 13.81  | 107.71 | 8.98E-01 | -22.75 | 11.42  | 4.64E-02 | -9.32  | 37.10 | 8.02E-01 |
| cg14074285 | 26.14  | 10.97 | 1.72E-02 | 28.62  | 15.44 | 6.38E-02 | 21.41  | 35.80  | 5.50E-01 | -20.82 | 40.47  | 6.07E-01 | 34.19  | 19.16 | 7.43E-02 |
| cg03220633 | 20.11  | 8.44  | 1.72E-02 | 30.99  | 13.02 | 1.73E-02 | 38.78  | 30.70  | 2.07E-01 | 22.32  | 29.05  | 4.42E-01 | 5.42   | 13.03 | 6.77E-01 |
| cg12827262 | 17.38  | 7.30  | 1.72E-02 | 13.06  | 10.43 | 2.10E-01 | 13.48  | 20.15  | 5.03E-01 | 55.48  | 33.86  | 1.01E-01 | 19.96  | 12.64 | 1.14E-01 |
| cg19180827 | 9.28   | 3.90  | 1.72E-02 | 6.07   | 6.39  | 3.42E-01 | 21.24  | 8.95   | 1.77E-02 | 4.63   | 6.90   | 5.02E-01 | 12.78  | 11.29 | 2.58E-01 |
| cg26049379 | -25.24 | 10.60 | 1.72E-02 | -36.52 | 16.93 | 3.10E-02 | -20.40 | 26.86  | 4.48E-01 | -11.09 | 21.56  | 6.07E-01 | -24.11 | 23.07 | 2.96E-01 |
| cg24094550 | 20.70  | 8.69  | 1.72E-02 | 25.59  | 15.79 | 1.05E-01 | 19.59  | 21.34  | 3.58E-01 | 15.55  | 17.03  | 3.61E-01 | 20.85  | 16.70 | 2.12E-01 |

|                |        |       |          |        |       |          |         |        |          |        |       |          |        |       |          |
|----------------|--------|-------|----------|--------|-------|----------|---------|--------|----------|--------|-------|----------|--------|-------|----------|
| cg21484315     | -13.16 | 5.53  | 1.72E-02 | -21.42 | 8.18  | 8.83E-03 | -10.60  | 12.54  | 3.98E-01 | -5.00  | 15.96 | 7.54E-01 | -3.17  | 11.53 | 7.84E-01 |
| ch.2.85209317F | 29.36  | 12.33 | 1.72E-02 | 27.08  | 15.63 | 8.32E-02 | 27.76   | 46.52  | 5.51E-01 | 14.79  | 61.37 | 8.10E-01 | 37.29  | 23.84 | 1.18E-01 |
| cg19481355     | -10.13 | 4.25  | 1.72E-02 | -13.80 | 7.24  | 5.67E-02 | -1.94   | 10.54  | 8.54E-01 | -11.85 | 6.85  | 8.38E-02 | -4.58  | 13.02 | 7.25E-01 |
| cg11150074     | 19.40  | 8.15  | 1.72E-02 | 10.50  | 16.95 | 5.36E-01 | 51.80   | 35.64  | 1.46E-01 | 18.81  | 11.13 | 9.11E-02 | 23.17  | 19.12 | 2.26E-01 |
| cg14423703     | -27.06 | 11.36 | 1.72E-02 | -4.41  | 33.63 | 8.96E-01 | -182.21 | 161.60 | 2.60E-01 | -25.31 | 12.60 | 4.46E-02 | -74.57 | 43.51 | 8.66E-02 |
| cg04349727     | -8.94  | 3.75  | 1.72E-02 | -18.43 | 7.09  | 9.37E-03 | -9.60   | 9.13   | 2.93E-01 | -4.65  | 5.93  | 4.33E-01 | -1.95  | 9.67  | 8.40E-01 |
| cg07820742     | 25.15  | 10.56 | 1.72E-02 | 22.01  | 17.16 | 2.00E-01 | 30.41   | 28.00  | 2.77E-01 | 31.66  | 32.26 | 3.26E-01 | 24.47  | 17.32 | 1.58E-01 |
| cg10602135     | -21.05 | 8.84  | 1.72E-02 | -16.53 | 16.40 | 3.14E-01 | -5.58   | 42.03  | 8.94E-01 | -25.64 | 12.01 | 3.27E-02 | -17.09 | 25.17 | 4.97E-01 |
| cg10322510     | 43.64  | 18.32 | 1.72E-02 | 67.19  | 24.20 | 5.49E-03 | -5.71   | 59.60  | 9.24E-01 | 21.72  | 56.41 | 7.00E-01 | 14.82  | 38.49 | 7.00E-01 |
| cg21170304     | -15.41 | 6.47  | 1.72E-02 | -7.19  | 17.58 | 6.82E-01 | -14.00  | 21.84  | 5.22E-01 | -16.26 | 7.74  | 3.58E-02 | -23.69 | 23.14 | 3.06E-01 |
| cg06840973     | 21.12  | 8.87  | 1.72E-02 | 6.39   | 30.10 | 8.32E-01 | -50.29  | 65.18  | 4.40E-01 | 24.83  | 9.70  | 1.04E-02 | 12.48  | 36.54 | 7.33E-01 |
| cg01987516     | 7.15   | 3.00  | 1.72E-02 | 3.27   | 5.40  | 5.45E-01 | 11.76   | 7.28   | 1.06E-01 | 9.42   | 5.04  | 6.17E-02 | 4.80   | 7.35  | 5.14E-01 |
| cg24679890     | 9.70   | 4.07  | 1.72E-02 | 9.83   | 6.18  | 1.12E-01 | 7.19    | 8.57   | 4.01E-01 | 17.05  | 9.86  | 8.39E-02 | 5.33   | 9.87  | 5.89E-01 |
| cg05944661     | -12.80 | 5.38  | 1.72E-02 | -18.00 | 8.43  | 3.27E-02 | -17.59  | 12.78  | 1.69E-01 | -9.15  | 14.71 | 5.34E-01 | -4.04  | 10.11 | 6.89E-01 |
| cg06523224     | 14.11  | 5.92  | 1.72E-02 | -4.13  | 17.23 | 8.11E-01 | 3.28    | 36.95  | 9.29E-01 | 17.41  | 6.79  | 1.03E-02 | 13.26  | 19.20 | 4.90E-01 |
| cg00431447     | 26.13  | 10.97 | 1.72E-02 | 1.88   | 20.04 | 9.25E-01 | 59.07   | 39.13  | 1.31E-01 | 26.71  | 15.45 | 8.40E-02 | 52.08  | 27.11 | 5.48E-02 |
| cg05223441     | -18.82 | 7.90  | 1.73E-02 | -16.82 | 13.64 | 2.18E-01 | -3.79   | 17.42  | 8.28E-01 | -32.05 | 16.77 | 5.59E-02 | -22.30 | 16.25 | 1.70E-01 |
| cg10616694     | -11.21 | 4.71  | 1.73E-02 | -18.49 | 9.12  | 4.27E-02 | -1.32   | 15.32  | 9.31E-01 | -10.61 | 6.49  | 1.02E-01 | -5.07  | 14.05 | 7.18E-01 |
| cg20541120     | 18.77  | 7.88  | 1.73E-02 | 21.91  | 14.83 | 1.40E-01 | -21.79  | 35.41  | 5.38E-01 | 19.52  | 10.29 | 5.79E-02 | 27.25  | 27.67 | 3.25E-01 |
| cg03131556     | 11.01  | 4.62  | 1.73E-02 | 11.15  | 5.49  | 4.22E-02 | 15.87   | 12.80  | 2.15E-01 | 24.21  | 16.67 | 1.46E-01 | -10.16 | 16.09 | 5.28E-01 |
| cg13823136     | 33.63  | 14.12 | 1.73E-02 | 22.87  | 18.82 | 2.24E-01 | -70.24  | 99.21  | 4.79E-01 | 52.07  | 39.04 | 1.82E-01 | 53.74  | 26.42 | 4.19E-02 |
| cg14143435     | -42.77 | 17.96 | 1.73E-02 | -43.62 | 33.18 | 1.89E-01 | -121.58 | 198.76 | 5.41E-01 | -48.47 | 23.30 | 3.75E-02 | -1.88  | 55.51 | 9.73E-01 |
| cg20780546     | -13.17 | 5.53  | 1.73E-02 | -6.58  | 13.08 | 6.15E-01 | 9.40    | 15.71  | 5.49E-01 | -17.98 | 7.09  | 1.13E-02 | -21.20 | 13.97 | 1.29E-01 |
| cg15007228     | 17.70  | 7.44  | 1.73E-02 | 15.99  | 10.79 | 1.38E-01 | 23.99   | 16.94  | 1.57E-01 | 14.73  | 20.36 | 4.69E-01 | 17.71  | 16.68 | 2.88E-01 |
| cg20725907     | 8.03   | 3.37  | 1.73E-02 | -1.03  | 8.25  | 9.01E-01 | 8.36    | 8.07   | 3.00E-01 | 8.49   | 4.46  | 5.72E-02 | 21.75  | 11.44 | 5.72E-02 |
| cg22803410     | 20.15  | 8.46  | 1.73E-02 | 18.62  | 14.66 | 2.04E-01 | 20.80   | 15.47  | 1.79E-01 | 20.44  | 18.50 | 2.69E-01 | 21.75  | 21.26 | 3.06E-01 |
| cg00176638     | -7.34  | 3.08  | 1.73E-02 | -9.08  | 5.77  | 1.16E-01 | -1.67   | 9.15   | 8.55E-01 | -7.21  | 4.41  | 1.02E-01 | -9.17  | 9.15  | 3.16E-01 |
| cg23008352     | -13.52 | 5.68  | 1.73E-02 | -4.79  | 10.67 | 6.54E-01 | -11.85  | 15.32  | 4.39E-01 | -12.82 | 9.70  | 1.86E-01 | -25.98 | 11.68 | 2.61E-02 |
| cg23476065     | -10.51 | 4.41  | 1.73E-02 | -10.47 | 5.96  | 7.89E-02 | -13.18  | 10.13  | 1.93E-01 | -0.79  | 17.81 | 9.64E-01 | -11.05 | 9.86  | 2.62E-01 |
| cg01751605     | 38.66  | 16.24 | 1.73E-02 | 36.66  | 18.98 | 5.34E-02 | -29.45  | 48.54  | 5.44E-01 | 75.91  | 27.84 | 6.41E-03 | 29.34  | 32.75 | 3.70E-01 |
| cg18655958     | -39.81 | 16.72 | 1.73E-02 | -58.23 | 28.67 | 4.22E-02 | -193.12 | 188.81 | 3.06E-01 | -27.94 | 22.76 | 2.20E-01 | -30.32 | 50.01 | 5.44E-01 |
| cg09763373     | 7.28   | 3.06  | 1.73E-02 | 5.62   | 3.60  | 1.19E-01 | 13.12   | 8.10   | 1.05E-01 | 20.77  | 12.59 | 9.89E-02 | 1.74   | 10.93 | 8.74E-01 |
| cg26227957     | 7.17   | 3.01  | 1.73E-02 | 4.89   | 4.08  | 2.31E-01 | 12.72   | 6.80   | 6.13E-02 | 13.90  | 7.82  | 7.55E-02 | -0.54  | 9.10  | 9.52E-01 |
| cg12213062     | 14.78  | 6.21  | 1.73E-02 | 14.62  | 15.32 | 3.40E-01 | 27.75   | 18.56  | 1.35E-01 | 12.52  | 8.74  | 1.52E-01 | 13.45  | 13.25 | 3.10E-01 |
| cg09463882     | 28.95  | 12.16 | 1.73E-02 | 42.67  | 32.94 | 1.95E-01 | -1.83   | 87.05  | 9.83E-01 | 28.13  | 13.93 | 4.35E-02 | 21.07  | 42.48 | 6.20E-01 |

|            |        |       |          |        |       |          |        |        |          |        |       |          |         |       |          |
|------------|--------|-------|----------|--------|-------|----------|--------|--------|----------|--------|-------|----------|---------|-------|----------|
| cg14063809 | 37.10  | 15.59 | 1.73E-02 | 45.98  | 18.61 | 1.35E-02 | 63.06  | 79.96  | 4.30E-01 | 5.71   | 66.94 | 9.32E-01 | 10.36   | 34.34 | 7.63E-01 |
| cg09099500 | -12.89 | 5.41  | 1.73E-02 | -24.97 | 16.47 | 1.29E-01 | -24.46 | 27.68  | 3.77E-01 | -9.64  | 6.09  | 1.13E-01 | -25.89  | 21.58 | 2.30E-01 |
| cg22242614 | -11.32 | 4.76  | 1.73E-02 | -3.90  | 12.05 | 7.46E-01 | -12.07 | 17.98  | 5.02E-01 | -12.42 | 6.00  | 3.86E-02 | -14.17  | 12.44 | 2.55E-01 |
| cg07962303 | 10.20  | 4.29  | 1.73E-02 | 11.49  | 6.63  | 8.30E-02 | 13.55  | 12.41  | 2.75E-01 | 11.35  | 8.09  | 1.60E-01 | 3.24    | 10.06 | 7.47E-01 |
| cg22978515 | 9.67   | 4.06  | 1.73E-02 | 2.25   | 6.08  | 7.11E-01 | 12.91  | 6.62   | 5.13E-02 | 8.24   | 15.62 | 5.98E-01 | 20.96   | 9.49  | 2.72E-02 |
| cg10359230 | 11.12  | 4.67  | 1.73E-02 | 9.64   | 5.93  | 1.04E-01 | 11.87  | 13.87  | 3.92E-01 | 4.80   | 25.03 | 8.48E-01 | 15.68   | 9.73  | 1.07E-01 |
| cg07584558 | -30.63 | 12.87 | 1.73E-02 | -28.76 | 17.36 | 9.76E-02 | -20.62 | 38.79  | 5.95E-01 | -6.62  | 34.03 | 8.46E-01 | -58.82  | 28.98 | 4.24E-02 |
| cg01587190 | -15.31 | 6.44  | 1.73E-02 | -8.92  | 14.27 | 5.32E-01 | 12.92  | 56.07  | 8.18E-01 | -16.34 | 7.87  | 3.78E-02 | -23.86  | 18.99 | 2.09E-01 |
| cg20902146 | -24.25 | 10.19 | 1.73E-02 | -3.49  | 27.72 | 9.00E-01 | 18.93  | 109.83 | 8.63E-01 | -27.70 | 11.45 | 1.56E-02 | -31.14  | 40.05 | 4.37E-01 |
| cg16231500 | 39.76  | 16.71 | 1.73E-02 | 42.18  | 26.06 | 1.06E-01 | 26.56  | 44.04  | 5.46E-01 | 60.17  | 50.75 | 2.36E-01 | 35.87   | 28.81 | 2.13E-01 |
| cg21427902 | -11.73 | 4.93  | 1.73E-02 | -24.31 | 9.04  | 7.18E-03 | -1.26  | 12.67  | 9.21E-01 | -6.48  | 5.78  | 2.62E-01 | -17.25  | 11.92 | 1.48E-01 |
| cg03082523 | -12.05 | 5.06  | 1.73E-02 | -12.95 | 7.05  | 6.64E-02 | -16.95 | 12.90  | 1.89E-01 | -1.72  | 14.54 | 9.06E-01 | -12.21  | 11.08 | 2.70E-01 |
| cg20897046 | -35.55 | 14.94 | 1.74E-02 | -31.11 | 20.79 | 1.35E-01 | 17.60  | 50.62  | 7.28E-01 | -26.89 | 46.27 | 5.61E-01 | -62.37  | 27.65 | 2.41E-02 |
| cg24033067 | -32.96 | 13.85 | 1.74E-02 | -38.85 | 16.62 | 1.94E-02 | 40.13  | 58.67  | 4.94E-01 | -78.63 | 51.13 | 1.24E-01 | -13.83  | 33.00 | 6.75E-01 |
| cg16840547 | 8.22   | 3.46  | 1.74E-02 | 1.73   | 5.57  | 7.56E-01 | 12.93  | 7.26   | 7.51E-02 | 14.81  | 6.60  | 2.49E-02 | 5.03    | 10.25 | 6.24E-01 |
| cg23704703 | 35.32  | 14.85 | 1.74E-02 | 42.85  | 27.45 | 1.18E-01 | 46.11  | 57.25  | 4.21E-01 | 29.58  | 21.10 | 1.61E-01 | 34.69   | 38.96 | 3.73E-01 |
| cg12184994 | -25.57 | 10.75 | 1.74E-02 | -22.95 | 13.82 | 9.68E-02 | -23.92 | 40.00  | 5.50E-01 | -31.92 | 26.77 | 2.33E-01 | -29.81  | 26.75 | 2.65E-01 |
| cg23385395 | 5.82   | 2.44  | 1.74E-02 | 4.91   | 3.11  | 1.15E-01 | 4.59   | 5.84   | 4.32E-01 | 11.35  | 10.15 | 2.64E-01 | 8.83    | 6.31  | 1.61E-01 |
| cg12624721 | -24.88 | 10.46 | 1.74E-02 | -39.44 | 14.47 | 6.42E-03 | 16.17  | 25.13  | 5.20E-01 | -29.94 | 19.53 | 1.25E-01 | -23.66  | 18.88 | 2.10E-01 |
| cg01586959 | -13.43 | 5.64  | 1.74E-02 | -14.36 | 7.17  | 4.52E-02 | -37.30 | 17.89  | 3.70E-02 | 5.17   | 27.63 | 8.52E-01 | -4.32   | 11.54 | 7.08E-01 |
| cg00082833 | -64.35 | 27.05 | 1.74E-02 | -67.90 | 33.24 | 4.11E-02 | 160.66 | 161.08 | 3.19E-01 | -49.39 | 70.34 | 4.83E-01 | -102.89 | 67.37 | 1.27E-01 |
| cg09060469 | -13.76 | 5.79  | 1.74E-02 | -31.47 | 19.23 | 1.02E-01 | 8.60   | 27.80  | 7.57E-01 | -11.99 | 6.55  | 6.71E-02 | -22.62  | 19.85 | 2.54E-01 |
| cg11518846 | 21.60  | 9.08  | 1.74E-02 | 32.22  | 24.31 | 1.85E-01 | 17.80  | 46.19  | 7.00E-01 | 22.20  | 11.33 | 5.02E-02 | 12.04   | 21.40 | 5.74E-01 |
| cg22284311 | -14.13 | 5.94  | 1.74E-02 | -16.03 | 13.11 | 2.21E-01 | -34.51 | 15.86  | 2.96E-02 | -6.30  | 8.04  | 4.33E-01 | -23.54  | 18.03 | 1.92E-01 |
| cg23198568 | 39.76  | 16.72 | 1.74E-02 | 32.33  | 22.43 | 1.49E-01 | 50.95  | 46.14  | 2.70E-01 | 53.69  | 53.11 | 3.12E-01 | 45.71   | 36.11 | 2.06E-01 |
| cg10409560 | -9.91  | 4.17  | 1.74E-02 | -3.31  | 11.71 | 7.77E-01 | -10.62 | 23.00  | 6.44E-01 | -9.93  | 4.77  | 3.73E-02 | -20.30  | 15.03 | 1.77E-01 |
| cg16216212 | -14.38 | 6.05  | 1.74E-02 | -19.61 | 10.43 | 6.02E-02 | 10.35  | 14.34  | 4.71E-01 | -19.95 | 6.71  | 2.95E-03 | -13.38  | 15.55 | 3.90E-01 |
| cg02996364 | 20.69  | 8.70  | 1.74E-02 | 26.87  | 15.90 | 9.11E-02 | -2.88  | 19.14  | 8.81E-01 | 25.88  | 13.99 | 6.43E-02 | 30.08   | 26.52 | 2.57E-01 |
| cg07549278 | 19.53  | 8.21  | 1.74E-02 | 13.46  | 20.17 | 5.05E-01 | 25.07  | 27.81  | 3.67E-01 | 14.51  | 11.09 | 1.91E-01 | 35.93   | 18.39 | 5.08E-02 |
| cg11674130 | 17.16  | 7.21  | 1.74E-02 | 19.52  | 9.63  | 4.26E-02 | 4.71   | 22.90  | 8.37E-01 | 13.08  | 30.47 | 6.68E-01 | 17.64   | 13.56 | 1.93E-01 |
| cg05305099 | 20.58  | 8.66  | 1.74E-02 | 17.70  | 18.20 | 3.31E-01 | 17.70  | 21.05  | 4.00E-01 | 20.29  | 12.43 | 1.03E-01 | 31.31   | 25.02 | 2.11E-01 |
| cg24869815 | 11.31  | 4.76  | 1.74E-02 | 10.72  | 6.44  | 9.63E-02 | 14.48  | 12.84  | 2.59E-01 | 17.24  | 10.74 | 1.08E-01 | 0.85    | 13.63 | 9.50E-01 |
| cg19294125 | 36.06  | 15.16 | 1.74E-02 | 21.43  | 25.50 | 4.01E-01 | 55.47  | 98.63  | 5.74E-01 | 50.92  | 20.74 | 1.41E-02 | -0.58   | 51.04 | 9.91E-01 |
| cg22588275 | -15.98 | 6.72  | 1.74E-02 | -4.05  | 17.27 | 8.15E-01 | -13.86 | 34.71  | 6.90E-01 | -16.51 | 8.09  | 4.13E-02 | -28.50  | 19.31 | 1.40E-01 |
| cg09684112 | 10.37  | 4.36  | 1.74E-02 | 15.47  | 7.60  | 4.17E-02 | 11.15  | 9.88   | 2.59E-01 | 7.33   | 8.99  | 4.15E-01 | 5.71    | 8.90  | 5.21E-01 |



|            |        |       |          |        |       |          |         |        |          |        |       |          |        |       |          |
|------------|--------|-------|----------|--------|-------|----------|---------|--------|----------|--------|-------|----------|--------|-------|----------|
| cg12503190 | 36.23  | 15.24 | 1.74E-02 | 36.70  | 33.24 | 2.70E-01 | -91.97  | 130.81 | 4.82E-01 | 42.83  | 18.80 | 2.28E-02 | 13.76  | 43.98 | 7.54E-01 |
| cg03903296 | -13.17 | 5.54  | 1.74E-02 | -12.74 | 8.80  | 1.47E-01 | -9.10   | 12.99  | 4.84E-01 | -15.21 | 12.57 | 2.26E-01 | -15.43 | 11.62 | 1.84E-01 |
| cg02969426 | 6.41   | 2.69  | 1.74E-02 | 5.44   | 4.00  | 1.74E-01 | 8.88    | 7.48   | 2.36E-01 | 7.85   | 4.85  | 1.06E-01 | 3.38   | 8.19  | 6.80E-01 |
| cg16248201 | 38.27  | 16.10 | 1.74E-02 | -21.76 | 47.39 | 6.46E-01 | -29.97  | 182.67 | 8.70E-01 | 43.60  | 17.92 | 1.50E-02 | 83.39  | 60.83 | 1.70E-01 |
| cg13479215 | -10.97 | 4.61  | 1.74E-02 | -19.91 | 9.87  | 4.38E-02 | -16.08  | 15.12  | 2.88E-01 | -7.69  | 6.11  | 2.08E-01 | -6.24  | 13.46 | 6.43E-01 |
| cg03997139 | 10.35  | 4.35  | 1.74E-02 | 11.61  | 6.65  | 8.06E-02 | 22.15   | 11.66  | 5.75E-02 | 1.40   | 15.50 | 9.28E-01 | 6.15   | 7.32  | 4.01E-01 |
| cg18297491 | 26.63  | 11.20 | 1.74E-02 | 29.41  | 12.38 | 1.75E-02 | 102.34  | 75.85  | 1.77E-01 | 27.04  | 53.11 | 6.11E-01 | -7.81  | 33.12 | 8.14E-01 |
| cg02747254 | 9.35   | 3.93  | 1.74E-02 | 9.24   | 5.85  | 1.14E-01 | 9.47    | 7.28   | 1.93E-01 | 13.08  | 12.69 | 3.02E-01 | 7.20   | 9.85  | 4.65E-01 |
| cg21439539 | -38.86 | 16.35 | 1.74E-02 | 8.27   | 36.06 | 8.19E-01 | -15.26  | 181.96 | 9.33E-01 | -52.11 | 19.16 | 6.55E-03 | -42.86 | 67.37 | 5.25E-01 |
| cg10087172 | 27.12  | 11.41 | 1.74E-02 | 20.31  | 32.69 | 5.34E-01 | 49.25   | 125.13 | 6.94E-01 | 29.27  | 12.77 | 2.19E-02 | 12.23  | 42.58 | 7.74E-01 |
| cg18463001 | -31.88 | 13.41 | 1.74E-02 | -40.80 | 17.99 | 2.33E-02 | 28.21   | 70.77  | 6.90E-01 | 18.91  | 80.17 | 8.14E-01 | -28.26 | 21.74 | 1.94E-01 |
| cg16345171 | -10.94 | 4.60  | 1.74E-02 | -19.73 | 6.66  | 3.07E-03 | -7.35   | 9.77   | 4.52E-01 | 4.11   | 11.31 | 7.16E-01 | -10.26 | 7.37  | 1.64E-01 |
| cg06355129 | 6.48   | 2.73  | 1.74E-02 | 3.59   | 4.13  | 3.85E-01 | 8.54    | 5.30   | 1.07E-01 | 16.64  | 8.56  | 5.20E-02 | 4.89   | 6.12  | 4.24E-01 |
| cg14678774 | 13.97  | 5.88  | 1.74E-02 | 18.98  | 9.88  | 5.47E-02 | 6.19    | 15.41  | 6.88E-01 | 10.60  | 11.33 | 3.50E-01 | 15.09  | 12.19 | 2.16E-01 |
| cg26226511 | 25.54  | 10.74 | 1.74E-02 | 34.05  | 15.27 | 2.57E-02 | 32.22   | 30.87  | 2.97E-01 | -2.71  | 29.44 | 9.27E-01 | 20.51  | 21.47 | 3.39E-01 |
| cg13581582 | 15.88  | 6.68  | 1.75E-02 | 12.95  | 12.64 | 3.06E-01 | -26.30  | 32.45  | 4.18E-01 | 17.06  | 9.55  | 7.39E-02 | 26.66  | 15.40 | 8.34E-02 |
| cg18633600 | 14.88  | 6.26  | 1.75E-02 | 20.66  | 10.14 | 4.15E-02 | 29.71   | 15.85  | 6.08E-02 | 3.86   | 12.95 | 7.66E-01 | 6.39   | 13.09 | 6.25E-01 |
| cg14029856 | -10.30 | 4.33  | 1.75E-02 | -9.58  | 7.54  | 2.04E-01 | -0.35   | 9.07   | 9.69E-01 | -13.91 | 8.18  | 8.89E-02 | -19.63 | 10.82 | 6.97E-02 |
| cg21611775 | -32.69 | 13.75 | 1.75E-02 | -33.50 | 19.42 | 8.45E-02 | 37.55   | 52.02  | 4.70E-01 | -50.61 | 29.05 | 8.15E-02 | -35.05 | 30.41 | 2.49E-01 |
| cg01947138 | -37.57 | 15.81 | 1.75E-02 | -35.95 | 20.71 | 8.27E-02 | -19.20  | 42.32  | 6.50E-01 | -34.00 | 52.40 | 5.16E-01 | -58.06 | 36.54 | 1.12E-01 |
| cg09929879 | 32.40  | 13.63 | 1.75E-02 | 27.37  | 21.15 | 1.96E-01 | 2.20    | 39.01  | 9.55E-01 | 29.83  | 27.27 | 2.74E-01 | 62.62  | 29.57 | 3.42E-02 |
| cg13269166 | -33.36 | 14.03 | 1.75E-02 | -35.68 | 18.35 | 5.19E-02 | -69.14  | 38.03  | 6.91E-02 | -26.67 | 39.59 | 5.00E-01 | 1.80   | 35.84 | 9.60E-01 |
| cg01267797 | 8.69   | 3.65  | 1.75E-02 | 8.36   | 4.55  | 6.59E-02 | 18.44   | 9.58   | 5.42E-02 | 3.97   | 15.82 | 8.02E-01 | 2.50   | 9.30  | 7.88E-01 |
| cg04522866 | 16.16  | 6.80  | 1.75E-02 | 15.97  | 9.58  | 9.56E-02 | 16.65   | 15.13  | 2.71E-01 | 19.05  | 18.07 | 2.92E-01 | 13.46  | 17.37 | 4.38E-01 |
| cg08687751 | 23.80  | 10.01 | 1.75E-02 | 37.33  | 20.71 | 7.15E-02 | -3.99   | 25.16  | 8.74E-01 | 19.20  | 11.64 | 9.90E-02 | 63.05  | 31.60 | 4.60E-02 |
| cg22379207 | -36.43 | 15.33 | 1.75E-02 | -39.47 | 17.06 | 2.07E-02 | -189.77 | 123.87 | 1.26E-01 | 4.57   | 76.34 | 9.52E-01 | -13.53 | 41.38 | 7.44E-01 |
| cg01617280 | -9.11  | 3.83  | 1.75E-02 | -14.37 | 7.57  | 5.77E-02 | -14.43  | 13.74  | 2.94E-01 | -5.81  | 5.21  | 2.65E-01 | -9.29  | 10.85 | 3.92E-01 |
| cg18034719 | 16.73  | 7.04  | 1.75E-02 | 24.17  | 12.40 | 5.13E-02 | 9.74    | 13.64  | 4.75E-01 | 16.38  | 13.32 | 2.19E-01 | 13.44  | 19.37 | 4.88E-01 |
| cg24054668 | 13.82  | 5.82  | 1.75E-02 | 11.20  | 16.01 | 4.84E-01 | 18.06   | 39.48  | 6.47E-01 | 16.00  | 6.58  | 1.51E-02 | -8.10  | 22.64 | 7.20E-01 |
| cg07054895 | 12.83  | 5.40  | 1.75E-02 | 18.69  | 11.74 | 1.12E-01 | 15.46   | 21.72  | 4.77E-01 | 7.60   | 5.58  | 1.73E-01 | 40.36  | 18.80 | 3.18E-02 |
| cg06721806 | -14.42 | 6.07  | 1.75E-02 | -2.47  | 9.67  | 7.98E-01 | -22.34  | 12.26  | 6.83E-02 | -19.41 | 14.45 | 1.79E-01 | -24.66 | 14.14 | 8.11E-02 |
| cg11243995 | -10.86 | 4.57  | 1.75E-02 | -11.96 | 9.49  | 2.08E-01 | -4.95   | 12.67  | 6.96E-01 | -12.98 | 6.40  | 4.26E-02 | -6.47  | 12.77 | 6.12E-01 |
| cg10880928 | 8.86   | 3.73  | 1.75E-02 | 6.87   | 4.89  | 1.60E-01 | 10.45   | 6.79   | 1.24E-01 | 20.41  | 7.62  | 7.38E-03 | 0.13   | 7.12  | 9.85E-01 |
| cg18739577 | -21.95 | 9.24  | 1.75E-02 | 4.89   | 33.42 | 8.84E-01 | -163.86 | 160.85 | 3.08E-01 | -25.88 | 9.82  | 8.38E-03 | 31.77  | 49.11 | 5.18E-01 |
| cg24217936 | 42.87  | 18.04 | 1.75E-02 | 81.69  | 55.18 | 1.39E-01 | 99.31   | 236.50 | 6.75E-01 | 43.13  | 20.07 | 3.16E-02 | -16.02 | 63.93 | 8.02E-01 |

|            |        |       |          |        |       |          |        |        |          |        |       |          |        |       |          |
|------------|--------|-------|----------|--------|-------|----------|--------|--------|----------|--------|-------|----------|--------|-------|----------|
| cg05203213 | -12.96 | 5.45  | 1.75E-02 | -11.02 | 7.79  | 1.57E-01 | -18.37 | 14.32  | 2.00E-01 | -2.83  | 17.39 | 8.71E-01 | -17.34 | 10.58 | 1.01E-01 |
| cg13470069 | -7.48  | 3.15  | 1.75E-02 | -4.50  | 4.97  | 3.66E-01 | -5.30  | 6.90   | 4.42E-01 | -14.89 | 7.48  | 4.66E-02 | -9.03  | 6.79  | 1.83E-01 |
| cg22313574 | 10.01  | 4.21  | 1.75E-02 | 14.03  | 5.97  | 1.89E-02 | 12.36  | 10.37  | 2.33E-01 | 8.25   | 13.76 | 5.49E-01 | 0.90   | 8.54  | 9.16E-01 |
| cg09136878 | 6.49   | 2.73  | 1.75E-02 | 5.94   | 3.77  | 1.15E-01 | 7.74   | 5.38   | 1.50E-01 | 11.27  | 9.86  | 2.53E-01 | 3.64   | 7.32  | 6.19E-01 |
| cg07186962 | 8.25   | 3.47  | 1.75E-02 | 9.80   | 4.47  | 2.84E-02 | 8.96   | 8.74   | 3.05E-01 | 13.48  | 10.65 | 2.06E-01 | -3.80  | 9.52  | 6.90E-01 |
| cg08116724 | 22.37  | 9.41  | 1.75E-02 | 25.12  | 14.54 | 8.41E-02 | 47.91  | 30.08  | 1.11E-01 | 25.77  | 22.36 | 2.49E-01 | 8.44   | 17.02 | 6.20E-01 |
| cg00312009 | 28.91  | 12.17 | 1.75E-02 | 48.19  | 26.44 | 6.84E-02 | 47.45  | 59.80  | 4.27E-01 | 18.52  | 15.24 | 2.24E-01 | 44.95  | 36.68 | 2.20E-01 |
| cg02792780 | 10.55  | 4.44  | 1.75E-02 | 12.95  | 5.82  | 2.62E-02 | 17.28  | 12.44  | 1.65E-01 | 3.68   | 10.82 | 7.34E-01 | 1.64   | 12.66 | 8.97E-01 |
| cg13376199 | -12.81 | 5.39  | 1.75E-02 | -19.42 | 7.83  | 1.31E-02 | -16.07 | 13.39  | 2.30E-01 | 6.87   | 13.95 | 6.22E-01 | -9.42  | 11.66 | 4.19E-01 |
| cg13462129 | 17.59  | 7.40  | 1.75E-02 | 24.10  | 11.02 | 2.87E-02 | -1.33  | 20.44  | 9.48E-01 | 40.66  | 29.79 | 1.72E-01 | 12.29  | 12.41 | 3.22E-01 |
| cg14186245 | 14.59  | 6.14  | 1.75E-02 | 16.91  | 10.17 | 9.63E-02 | 19.11  | 13.93  | 1.70E-01 | 5.63   | 12.64 | 6.56E-01 | 16.51  | 13.58 | 2.24E-01 |
| cg12353549 | -19.21 | 8.09  | 1.75E-02 | -9.44  | 22.45 | 6.74E-01 | 10.75  | 92.64  | 9.08E-01 | -20.94 | 9.07  | 2.10E-02 | -21.01 | 31.05 | 4.99E-01 |
| cg19844325 | 35.00  | 14.73 | 1.75E-02 | 9.29   | 42.74 | 8.28E-01 | 50.72  | 106.40 | 6.34E-01 | 34.01  | 16.57 | 4.01E-02 | 84.98  | 55.33 | 1.25E-01 |
| cg17595347 | 20.94  | 8.81  | 1.75E-02 | -6.69  | 23.96 | 7.80E-01 | 56.51  | 155.07 | 7.16E-01 | 27.05  | 9.71  | 5.34E-03 | -16.80 | 45.58 | 7.12E-01 |
| cg10778780 | -13.10 | 5.52  | 1.75E-02 | -23.50 | 11.31 | 3.77E-02 | -0.96  | 12.72  | 9.40E-01 | -10.78 | 8.22  | 1.90E-01 | -20.02 | 15.66 | 2.01E-01 |
| cg05710512 | 19.47  | 8.19  | 1.75E-02 | 8.98   | 18.45 | 6.27E-01 | 38.68  | 36.90  | 2.94E-01 | 21.92  | 10.03 | 2.89E-02 | 13.46  | 27.88 | 6.29E-01 |
| cg10372920 | 10.97  | 4.62  | 1.75E-02 | 4.02   | 4.57  | 3.79E-01 | 4.73   | 6.72   | 4.82E-01 | 25.36  | 7.73  | 1.03E-03 | 14.02  | 6.24  | 2.47E-02 |
| cg07320646 | 22.43  | 9.44  | 1.75E-02 | 0.29   | 31.80 | 9.93E-01 | -63.88 | 129.99 | 6.23E-01 | 26.72  | 10.29 | 9.42E-03 | 3.79   | 37.25 | 9.19E-01 |
| cg12082609 | 11.20  | 4.72  | 1.75E-02 | 14.81  | 6.14  | 1.60E-02 | 9.61   | 10.87  | 3.77E-01 | 18.46  | 9.48  | 5.16E-02 | -6.19  | 10.99 | 5.73E-01 |
| cg12854656 | 16.22  | 6.83  | 1.75E-02 | 32.23  | 20.39 | 1.14E-01 | 17.32  | 25.86  | 5.03E-01 | 14.46  | 7.78  | 6.29E-02 | 5.23   | 31.55 | 8.68E-01 |
| cg02079551 | -13.85 | 5.83  | 1.75E-02 | -26.27 | 16.33 | 1.08E-01 | 9.30   | 27.96  | 7.40E-01 | -12.54 | 6.77  | 6.39E-02 | -18.37 | 19.77 | 3.53E-01 |
| cg25096368 | 15.57  | 6.56  | 1.75E-02 | 9.70   | 10.16 | 3.40E-01 | 21.56  | 12.27  | 7.89E-02 | 22.42  | 20.82 | 2.82E-01 | 15.86  | 14.69 | 2.81E-01 |
| cg01013054 | 11.83  | 4.98  | 1.75E-02 | 18.86  | 7.95  | 1.77E-02 | 14.45  | 9.10   | 1.12E-01 | -6.71  | 14.34 | 6.40E-01 | 4.87   | 11.50 | 6.72E-01 |
| cg00365963 | 23.79  | 10.02 | 1.75E-02 | 48.69  | 20.36 | 1.68E-02 | 7.65   | 23.02  | 7.40E-01 | 15.35  | 14.67 | 2.95E-01 | 33.22  | 31.28 | 2.88E-01 |
| cg01721204 | 29.92  | 12.60 | 1.75E-02 | 3.59   | 43.88 | 9.35E-01 | 131.14 | 130.86 | 3.16E-01 | 27.76  | 13.91 | 4.60E-02 | 63.77  | 42.31 | 1.32E-01 |
| cg17230002 | 12.67  | 5.33  | 1.75E-02 | 10.62  | 6.03  | 7.79E-02 | 24.54  | 11.07  | 2.66E-02 | 22.41  | 11.83 | 5.83E-02 | -2.54  | 10.82 | 8.14E-01 |
| cg20916500 | 41.12  | 17.31 | 1.75E-02 | 43.84  | 23.15 | 5.82E-02 | 44.45  | 55.09  | 4.20E-01 | 11.52  | 61.34 | 8.51E-01 | 43.04  | 33.80 | 2.03E-01 |
| cg00966763 | -10.05 | 4.23  | 1.75E-02 | -11.95 | 6.69  | 7.39E-02 | -11.14 | 10.09  | 2.70E-01 | -7.73  | 9.64  | 4.23E-01 | -7.87  | 8.81  | 3.72E-01 |
| cg18440692 | -18.18 | 7.66  | 1.75E-02 | -25.59 | 9.49  | 6.99E-03 | -11.11 | 26.30  | 6.73E-01 | 33.15  | 44.86 | 4.60E-01 | -6.55  | 15.81 | 6.78E-01 |
| cg12160586 | 12.05  | 5.08  | 1.76E-02 | 15.31  | 7.08  | 3.07E-02 | 20.16  | 14.45  | 1.63E-01 | 3.07   | 15.79 | 8.46E-01 | 5.35   | 9.95  | 5.91E-01 |
| cg27238887 | 18.65  | 7.85  | 1.76E-02 | 31.88  | 14.36 | 2.65E-02 | 2.25   | 13.83  | 8.71E-01 | 16.75  | 16.22 | 3.02E-01 | 31.05  | 20.71 | 1.34E-01 |
| cg00867406 | -20.20 | 8.51  | 1.76E-02 | -27.98 | 11.98 | 1.95E-02 | -4.67  | 38.05  | 9.02E-01 | -25.43 | 17.05 | 1.36E-01 | 2.44   | 19.19 | 8.99E-01 |
| cg14912723 | 22.65  | 9.54  | 1.76E-02 | 11.67  | 26.97 | 6.65E-01 | 54.47  | 141.94 | 7.01E-01 | 27.03  | 10.63 | 1.10E-02 | -12.34 | 37.20 | 7.40E-01 |
| cg22490000 | -39.44 | 16.61 | 1.76E-02 | -30.79 | 21.48 | 1.52E-01 | -82.63 | 53.78  | 1.24E-01 | -19.38 | 43.12 | 6.53E-01 | -64.83 | 41.71 | 1.20E-01 |
| cg09387486 | 29.18  | 12.29 | 1.76E-02 | 29.61  | 15.09 | 4.97E-02 | 1.84   | 70.62  | 9.79E-01 | 20.65  | 46.46 | 6.57E-01 | 34.02  | 25.29 | 1.79E-01 |

|            |        |       |          |         |       |          |        |        |          |        |        |          |        |       |          |
|------------|--------|-------|----------|---------|-------|----------|--------|--------|----------|--------|--------|----------|--------|-------|----------|
| cg23163783 | 41.83  | 17.62 | 1.76E-02 | 50.23   | 20.77 | 1.56E-02 | -47.63 | 88.88  | 5.92E-01 | 14.38  | 88.63  | 8.71E-01 | 34.72  | 39.20 | 3.76E-01 |
| cg17072805 | 16.73  | 7.05  | 1.76E-02 | 28.29   | 11.39 | 1.30E-02 | -5.26  | 18.12  | 7.71E-01 | 23.72  | 11.94  | 4.70E-02 | 6.38   | 12.99 | 6.23E-01 |
| cg20516176 | 21.81  | 9.18  | 1.76E-02 | 13.92   | 21.91 | 5.25E-01 | 19.01  | 50.92  | 7.09E-01 | 20.69  | 10.99  | 5.98E-02 | 45.85  | 30.00 | 1.26E-01 |
| cg26151477 | 22.76  | 9.59  | 1.76E-02 | 39.00   | 26.86 | 1.47E-01 | 15.50  | 46.66  | 7.40E-01 | 18.53  | 11.03  | 9.29E-02 | 41.97  | 35.07 | 2.31E-01 |
| cg12010173 | -7.38  | 3.11  | 1.76E-02 | -23.09  | 9.58  | 1.60E-02 | -6.25  | 5.21   | 2.30E-01 | -6.02  | 4.65   | 1.96E-01 | -2.93  | 7.80  | 7.07E-01 |
| cg17725129 | -9.27  | 3.91  | 1.76E-02 | -1.16   | 7.10  | 8.70E-01 | -12.22 | 14.71  | 4.06E-01 | -16.60 | 6.17   | 7.12E-03 | -6.23  | 8.21  | 4.48E-01 |
| cg12408189 | -26.24 | 11.05 | 1.76E-02 | -38.23  | 22.33 | 8.69E-02 | -91.20 | 100.27 | 3.63E-01 | -23.05 | 14.09  | 1.02E-01 | -12.44 | 30.94 | 6.88E-01 |
| cg01100068 | 30.57  | 12.88 | 1.76E-02 | 34.03   | 19.05 | 7.41E-02 | 14.79  | 36.37  | 6.84E-01 | 26.95  | 33.28  | 4.18E-01 | 34.09  | 24.87 | 1.70E-01 |
| cg08742502 | -6.19  | 2.61  | 1.76E-02 | -4.84   | 3.59  | 1.77E-01 | -12.06 | 5.76   | 3.62E-02 | 4.76   | 9.69   | 6.23E-01 | -7.73  | 5.91  | 1.91E-01 |
| cg16647364 | -54.92 | 23.13 | 1.76E-02 | -60.41  | 32.07 | 5.96E-02 | 32.72  | 153.52 | 8.31E-01 | -94.42 | 51.99  | 6.93E-02 | -21.38 | 45.45 | 6.38E-01 |
| cg21618733 | -49.10 | 20.68 | 1.76E-02 | -60.80  | 25.81 | 1.85E-02 | -24.63 | 73.55  | 7.38E-01 | 40.43  | 84.88  | 6.34E-01 | -47.88 | 44.16 | 2.78E-01 |
| cg14884902 | -13.73 | 5.79  | 1.76E-02 | -6.86   | 15.41 | 6.56E-01 | -16.53 | 17.35  | 3.41E-01 | -12.66 | 7.21   | 7.91E-02 | -26.68 | 17.93 | 1.37E-01 |
| cg08300570 | 5.89   | 2.48  | 1.76E-02 | 5.71    | 3.29  | 8.28E-02 | 8.00   | 6.03   | 1.84E-01 | 1.30   | 6.73   | 8.46E-01 | 8.89   | 7.03  | 2.06E-01 |
| cg09232068 | -55.15 | 23.23 | 1.76E-02 | -49.62  | 28.82 | 8.51E-02 | 1.06   | 110.85 | 9.92E-01 | 5.30   | 100.92 | 9.58E-01 | -91.74 | 46.17 | 4.69E-02 |
| cg22258863 | 17.90  | 7.54  | 1.76E-02 | 15.60   | 20.71 | 4.51E-01 | 84.22  | 54.99  | 1.26E-01 | 19.21  | 8.98   | 3.25E-02 | 4.93   | 19.89 | 8.04E-01 |
| cg13209113 | -24.24 | 10.21 | 1.76E-02 | -32.44  | 14.26 | 2.29E-02 | 12.52  | 19.74  | 5.26E-01 | -26.46 | 14.17  | 6.17E-02 | -41.68 | 17.27 | 1.58E-02 |
| cg06716568 | -37.44 | 15.78 | 1.76E-02 | -50.10  | 20.38 | 1.40E-02 | 6.31   | 43.57  | 8.85E-01 | -22.03 | 62.49  | 7.24E-01 | -33.24 | 34.78 | 3.39E-01 |
| cg26925644 | 21.29  | 8.97  | 1.76E-02 | 17.12   | 15.37 | 2.65E-01 | 28.29  | 18.14  | 1.19E-01 | 13.49  | 16.98  | 4.27E-01 | 35.16  | 24.35 | 1.49E-01 |
| cg00534655 | -17.36 | 7.32  | 1.76E-02 | -20.27  | 12.47 | 1.04E-01 | -15.27 | 19.04  | 4.23E-01 | -12.34 | 13.38  | 3.57E-01 | -21.25 | 15.99 | 1.84E-01 |
| cg13990958 | 16.98  | 7.16  | 1.76E-02 | 10.45   | 15.28 | 4.94E-01 | 11.04  | 17.45  | 5.27E-01 | 20.11  | 10.34  | 5.18E-02 | 24.02  | 19.60 | 2.20E-01 |
| cg01521220 | 7.85   | 3.31  | 1.76E-02 | 8.83    | 4.36  | 4.28E-02 | 9.65   | 7.97   | 2.26E-01 | 9.09   | 8.78   | 3.00E-01 | -1.70  | 9.97  | 8.65E-01 |
| cg21089667 | 18.81  | 7.93  | 1.76E-02 | 48.43   | 23.43 | 3.87E-02 | 42.51  | 28.05  | 1.30E-01 | 12.50  | 9.13   | 1.71E-01 | 8.69   | 34.55 | 8.01E-01 |
| cg09664442 | 24.37  | 10.27 | 1.76E-02 | -4.59   | 32.49 | 8.88E-01 | 16.59  | 78.91  | 8.33E-01 | 27.90  | 11.49  | 1.51E-02 | 26.83  | 35.51 | 4.50E-01 |
| cg04117688 | -70.08 | 29.53 | 1.76E-02 | -100.18 | 39.95 | 1.22E-02 | 126.42 | 148.37 | 3.94E-01 | -90.57 | 55.70  | 1.04E-01 | -18.31 | 59.67 | 7.59E-01 |
| cg11813009 | 11.94  | 5.03  | 1.76E-02 | 9.02    | 7.88  | 2.53E-01 | 5.42   | 17.14  | 7.52E-01 | 12.62  | 8.04   | 1.17E-01 | 24.92  | 14.86 | 9.36E-02 |
| cg09514055 | -32.11 | 13.53 | 1.76E-02 | -45.30  | 23.06 | 4.94E-02 | -12.11 | 70.70  | 8.64E-01 | -31.10 | 19.25  | 1.06E-01 | -5.59  | 38.28 | 8.84E-01 |
| cg07641160 | 23.04  | 9.71  | 1.77E-02 | 22.81   | 31.77 | 4.73E-01 | 48.11  | 90.08  | 5.93E-01 | 22.85  | 10.76  | 3.38E-02 | 21.61  | 34.03 | 5.25E-01 |
| cg18483549 | -9.59  | 4.04  | 1.77E-02 | -5.72   | 9.98  | 5.67E-01 | -3.21  | 19.88  | 8.72E-01 | -12.67 | 4.88   | 9.34E-03 | 1.79   | 12.35 | 8.85E-01 |
| cg08716684 | -11.33 | 4.78  | 1.77E-02 | -18.30  | 8.20  | 2.56E-02 | -14.49 | 11.84  | 2.21E-01 | -4.78  | 8.82   | 5.88E-01 | -6.66  | 10.55 | 5.28E-01 |
| cg12342334 | 16.10  | 6.78  | 1.77E-02 | 12.61   | 23.15 | 5.86E-01 | -13.91 | 95.92  | 8.85E-01 | 15.18  | 7.38   | 3.97E-02 | 35.57  | 27.00 | 1.88E-01 |
| cg24899558 | -5.84  | 2.46  | 1.77E-02 | -4.83   | 4.30  | 2.62E-01 | -0.57  | 5.72   | 9.21E-01 | -8.35  | 4.21   | 4.72E-02 | -8.96  | 6.47  | 1.66E-01 |
| cg13826459 | -10.97 | 4.62  | 1.77E-02 | -12.62  | 7.30  | 8.40E-02 | -1.60  | 10.88  | 8.83E-01 | -21.69 | 14.14  | 1.25E-01 | -10.61 | 8.29  | 2.01E-01 |
| cg08697297 | -13.93 | 5.87  | 1.77E-02 | -16.45  | 11.23 | 1.43E-01 | -6.61  | 14.57  | 6.50E-01 | -19.00 | 9.21   | 3.92E-02 | -4.10  | 14.73 | 7.81E-01 |
| cg19296671 | 9.24   | 3.89  | 1.77E-02 | 10.39   | 6.07  | 8.68E-02 | 8.72   | 8.33   | 2.95E-01 | 1.99   | 9.15   | 8.28E-01 | 14.25  | 8.95  | 1.11E-01 |
| cg22629065 | -7.30  | 3.08  | 1.77E-02 | -10.72  | 5.42  | 4.77E-02 | 0.59   | 9.17   | 9.48E-01 | -7.76  | 4.76   | 1.03E-01 | -4.53  | 8.06  | 5.74E-01 |

|            |        |       |          |         |       |          |         |        |          |        |       |          |        |       |          |
|------------|--------|-------|----------|---------|-------|----------|---------|--------|----------|--------|-------|----------|--------|-------|----------|
| cg26657920 | -14.17 | 5.97  | 1.77E-02 | -16.00  | 14.48 | 2.69E-01 | -0.80   | 23.62  | 9.73E-01 | -13.52 | 7.38  | 6.67E-02 | -22.91 | 17.98 | 2.03E-01 |
| cg01211396 | 6.53   | 2.75  | 1.77E-02 | 5.38    | 3.31  | 1.05E-01 | 9.28    | 6.80   | 1.72E-01 | 12.24  | 10.56 | 2.47E-01 | 6.01   | 9.92  | 5.44E-01 |
| cg11747499 | 15.95  | 6.72  | 1.77E-02 | 22.53   | 10.53 | 3.25E-02 | 19.76   | 21.27  | 3.53E-01 | 8.52   | 22.17 | 7.01E-01 | 10.02  | 10.62 | 3.45E-01 |
| cg00510437 | 11.50  | 4.85  | 1.77E-02 | 13.15   | 6.72  | 5.03E-02 | 19.72   | 16.24  | 2.25E-01 | 17.58  | 15.61 | 2.60E-01 | 4.09   | 8.95  | 6.48E-01 |
| cg01626681 | 17.96  | 7.57  | 1.77E-02 | 17.12   | 15.76 | 2.77E-01 | 0.32    | 26.99  | 9.90E-01 | 25.33  | 12.34 | 4.01E-02 | 14.17  | 13.51 | 2.94E-01 |
| cg18117780 | 12.24  | 5.16  | 1.77E-02 | 13.97   | 7.60  | 6.60E-02 | 14.18   | 10.90  | 1.93E-01 | 20.86  | 16.28 | 2.00E-01 | 2.46   | 11.15 | 8.25E-01 |
| cg06303171 | -12.11 | 5.11  | 1.77E-02 | -17.77  | 10.51 | 9.09E-02 | -22.79  | 21.21  | 2.83E-01 | -11.18 | 6.49  | 8.53E-02 | 3.54   | 17.22 | 8.37E-01 |
| cg11689625 | 13.94  | 5.87  | 1.77E-02 | 17.25   | 7.28  | 1.79E-02 | 21.04   | 20.39  | 3.02E-01 | 0.95   | 27.63 | 9.73E-01 | 4.18   | 12.49 | 7.38E-01 |
| cg18305324 | 12.42  | 5.23  | 1.77E-02 | 14.88   | 7.36  | 4.31E-02 | 22.28   | 14.28  | 1.19E-01 | 5.45   | 15.31 | 7.22E-01 | 5.16   | 10.63 | 6.27E-01 |
| cg05908691 | -15.45 | 6.51  | 1.77E-02 | -16.68  | 10.12 | 9.94E-02 | -1.64   | 17.27  | 9.25E-01 | -26.21 | 14.05 | 6.22E-02 | -11.71 | 13.62 | 3.90E-01 |
| cg19923326 | 12.67  | 5.34  | 1.77E-02 | 20.37   | 8.75  | 1.99E-02 | 1.37    | 9.23   | 8.82E-01 | 20.42  | 16.70 | 2.21E-01 | 13.30  | 12.23 | 2.77E-01 |
| cg14570531 | 23.25  | 9.80  | 1.77E-02 | 27.94   | 21.73 | 1.98E-01 | 37.77   | 22.14  | 8.81E-02 | 19.08  | 14.62 | 1.92E-01 | 10.51  | 25.21 | 6.77E-01 |
| cg14018454 | -13.61 | 5.74  | 1.77E-02 | 4.56    | 15.29 | 7.66E-01 | -21.33  | 22.83  | 3.50E-01 | -16.31 | 6.70  | 1.50E-02 | -15.10 | 22.87 | 5.09E-01 |
| cg02459271 | -78.52 | 33.11 | 1.77E-02 | -112.77 | 46.58 | 1.55E-02 | -3.94   | 258.74 | 9.88E-01 | -86.15 | 62.96 | 1.71E-01 | 11.56  | 73.68 | 8.75E-01 |
| cg19421218 | -7.45  | 3.14  | 1.77E-02 | -7.89   | 5.81  | 1.75E-01 | -12.96  | 10.17  | 2.03E-01 | -7.08  | 4.48  | 1.15E-01 | -3.59  | 8.97  | 6.89E-01 |
| cg07510510 | -10.30 | 4.34  | 1.77E-02 | -12.54  | 8.41  | 1.36E-01 | 0.42    | 10.91  | 9.69E-01 | -12.20 | 6.70  | 6.84E-02 | -12.29 | 11.09 | 2.68E-01 |
| cg01477985 | 11.70  | 4.93  | 1.77E-02 | 11.25   | 7.87  | 1.53E-01 | -10.63  | 15.09  | 4.81E-01 | 18.22  | 8.33  | 2.88E-02 | 13.51  | 12.72 | 2.88E-01 |
| cg15589689 | 17.33  | 7.31  | 1.77E-02 | 32.38   | 19.15 | 9.08E-02 | 17.68   | 26.75  | 5.09E-01 | 12.14  | 8.75  | 1.65E-01 | 34.46  | 25.54 | 1.77E-01 |
| cg25372085 | 11.39  | 4.80  | 1.77E-02 | 15.62   | 5.73  | 6.45E-03 | 2.74    | 16.95  | 8.71E-01 | 11.51  | 25.44 | 6.51E-01 | -1.07  | 11.23 | 9.24E-01 |
| cg23166357 | -34.71 | 14.64 | 1.77E-02 | -11.14  | 57.34 | 8.46E-01 | -41.02  | 256.13 | 8.73E-01 | -37.97 | 15.60 | 1.49E-02 | -8.39  | 64.52 | 8.97E-01 |
| cg10586087 | -14.19 | 5.99  | 1.77E-02 | -7.99   | 16.76 | 6.34E-01 | -9.25   | 34.61  | 7.89E-01 | -16.17 | 6.79  | 1.72E-02 | -4.95  | 23.56 | 8.34E-01 |
| cg14028400 | 12.52  | 5.28  | 1.77E-02 | 7.02    | 5.55  | 2.05E-01 | 8.22    | 7.67   | 2.83E-01 | 38.87  | 13.14 | 3.10E-03 | 11.62  | 8.34  | 1.64E-01 |
| cg10170269 | 12.92  | 5.45  | 1.77E-02 | 9.43    | 8.80  | 2.84E-01 | 14.45   | 12.39  | 2.44E-01 | 19.83  | 9.90  | 4.53E-02 | 4.21   | 15.69 | 7.88E-01 |
| cg27228074 | -18.20 | 7.68  | 1.77E-02 | -28.82  | 19.85 | 1.47E-01 | 142.29  | 110.14 | 1.96E-01 | -17.29 | 8.99  | 5.44E-02 | -16.97 | 22.54 | 4.52E-01 |
| cg11651007 | 24.29  | 10.24 | 1.77E-02 | 19.78   | 11.23 | 7.81E-02 | -1.96   | 15.90  | 9.02E-01 | 46.79  | 19.21 | 1.48E-02 | 41.51  | 17.82 | 1.99E-02 |
| cg10741399 | -27.14 | 11.45 | 1.78E-02 | -84.02  | 46.78 | 7.25E-02 | -185.05 | 165.71 | 2.64E-01 | -23.32 | 12.22 | 5.64E-02 | -13.20 | 47.70 | 7.82E-01 |
| cg03805566 | 12.43  | 5.24  | 1.78E-02 | 13.38   | 15.75 | 3.95E-01 | -2.74   | 38.01  | 9.43E-01 | 14.97  | 5.82  | 1.01E-02 | -20.54 | 21.97 | 3.50E-01 |
| cg19133958 | 21.27  | 8.97  | 1.78E-02 | 23.21   | 13.43 | 8.39E-02 | 43.01   | 22.98  | 6.13E-02 | 38.92  | 26.80 | 1.46E-01 | -0.01  | 16.67 | 9.99E-01 |
| cg24781737 | 11.08  | 4.68  | 1.78E-02 | 11.43   | 6.90  | 9.76E-02 | 19.40   | 9.69   | 4.54E-02 | 2.27   | 11.89 | 8.48E-01 | 6.33   | 11.94 | 5.96E-01 |
| cg03528246 | 12.92  | 5.45  | 1.78E-02 | -3.65   | 13.12 | 7.81E-01 | 2.50    | 53.16  | 9.62E-01 | 14.98  | 6.56  | 2.24E-02 | 25.25  | 15.38 | 1.01E-01 |
| cg09229620 | 8.34   | 3.52  | 1.78E-02 | 12.37   | 5.92  | 3.65E-02 | 5.70    | 7.04   | 4.19E-01 | 5.74   | 6.56  | 3.81E-01 | 8.16   | 10.66 | 4.44E-01 |
| cg10696085 | 19.33  | 8.16  | 1.78E-02 | 18.87   | 25.69 | 4.63E-01 | -79.37  | 113.57 | 4.85E-01 | 18.50  | 9.20  | 4.44E-02 | 30.53  | 24.77 | 2.18E-01 |
| cg15964468 | 8.66   | 3.65  | 1.78E-02 | 9.57    | 5.52  | 8.27E-02 | 14.39   | 8.00   | 7.20E-02 | 4.66   | 10.04 | 6.42E-01 | 3.82   | 7.77  | 6.23E-01 |
| cg22999603 | 15.70  | 6.62  | 1.78E-02 | 25.39   | 9.77  | 9.38E-03 | 17.33   | 15.38  | 2.60E-01 | 15.57  | 16.81 | 3.54E-01 | -4.05  | 13.68 | 7.67E-01 |
| cg03984866 | 21.06  | 8.89  | 1.78E-02 | 22.70   | 17.56 | 1.96E-01 | 15.20   | 19.38  | 4.33E-01 | 26.41  | 13.37 | 4.83E-02 | 4.17   | 29.34 | 8.87E-01 |

|            |        |       |          |        |       |          |        |        |          |        |       |          |        |       |          |
|------------|--------|-------|----------|--------|-------|----------|--------|--------|----------|--------|-------|----------|--------|-------|----------|
| cg01995660 | 36.90  | 15.57 | 1.78E-02 | 42.05  | 19.88 | 3.44E-02 | 8.62   | 60.16  | 8.86E-01 | 32.60  | 49.60 | 5.11E-01 | 33.11  | 33.12 | 3.17E-01 |
| cg16520049 | 38.02  | 16.04 | 1.78E-02 | 52.57  | 24.14 | 2.94E-02 | 33.53  | 36.11  | 3.53E-01 | -11.44 | 38.23 | 7.65E-01 | 55.16  | 37.31 | 1.39E-01 |
| cg11388802 | -18.81 | 7.93  | 1.78E-02 | -15.34 | 15.75 | 3.30E-01 | -32.07 | 17.21  | 6.25E-02 | -10.64 | 12.46 | 3.93E-01 | -29.50 | 22.15 | 1.83E-01 |
| cg16993754 | 8.04   | 3.39  | 1.78E-02 | 9.08   | 4.81  | 5.91E-02 | 5.02   | 7.73   | 5.16E-01 | 8.44   | 10.40 | 4.17E-01 | 8.14   | 7.50  | 2.78E-01 |
| cg06432487 | 26.56  | 11.21 | 1.78E-02 | 19.31  | 22.95 | 4.00E-01 | 14.78  | 48.76  | 7.62E-01 | 26.47  | 14.59 | 6.96E-02 | 46.80  | 32.53 | 1.50E-01 |
| cg03470073 | 33.55  | 14.16 | 1.78E-02 | 38.90  | 20.37 | 5.62E-02 | 10.02  | 43.52  | 8.18E-01 | 50.18  | 36.62 | 1.71E-01 | 23.69  | 27.67 | 3.92E-01 |
| cg00745693 | 22.60  | 9.54  | 1.78E-02 | 21.30  | 19.84 | 2.83E-01 | 33.61  | 21.39  | 1.16E-01 | 16.01  | 14.76 | 2.78E-01 | 28.25  | 24.41 | 2.47E-01 |
| cg08823975 | 30.99  | 13.08 | 1.78E-02 | 51.20  | 21.38 | 1.67E-02 | 53.12  | 54.25  | 3.27E-01 | 6.62   | 20.16 | 7.43E-01 | 40.57  | 34.09 | 2.34E-01 |
| cg24834590 | -12.97 | 5.47  | 1.78E-02 | -17.59 | 15.57 | 2.59E-01 | -6.34  | 27.29  | 8.16E-01 | -12.32 | 6.22  | 4.74E-02 | -16.13 | 22.09 | 4.65E-01 |
| cg07178825 | 12.24  | 5.17  | 1.78E-02 | 9.58   | 8.23  | 2.45E-01 | 11.31  | 14.25  | 4.28E-01 | 11.21  | 10.03 | 2.64E-01 | 19.15  | 11.29 | 8.99E-02 |
| cg15754109 | 27.39  | 11.56 | 1.78E-02 | 27.26  | 13.21 | 3.91E-02 | 88.83  | 133.18 | 5.05E-01 | 66.83  | 40.87 | 1.02E-01 | 3.42   | 30.19 | 9.10E-01 |
| cg15965134 | 14.37  | 6.06  | 1.78E-02 | 15.62  | 9.52  | 1.01E-01 | 13.62  | 14.01  | 3.31E-01 | 16.22  | 16.00 | 3.10E-01 | 11.96  | 11.82 | 3.12E-01 |
| cg05023013 | 18.61  | 7.86  | 1.78E-02 | 12.64  | 12.87 | 3.26E-01 | 35.87  | 15.24  | 1.86E-02 | 7.89   | 16.35 | 6.29E-01 | 19.45  | 21.69 | 3.70E-01 |
| cg19287501 | -17.22 | 7.27  | 1.78E-02 | -26.17 | 13.30 | 4.91E-02 | -15.28 | 15.04  | 3.10E-01 | -5.98  | 13.54 | 6.58E-01 | -22.85 | 17.13 | 1.82E-01 |
| cg24696715 | 27.66  | 11.67 | 1.78E-02 | 41.61  | 18.82 | 2.70E-02 | 2.08   | 21.82  | 9.24E-01 | 14.98  | 16.28 | 3.57E-01 | 57.86  | 23.31 | 1.31E-02 |
| cg24436715 | 20.80  | 8.78  | 1.78E-02 | 27.62  | 21.59 | 2.01E-01 | 24.70  | 40.80  | 5.45E-01 | 19.63  | 11.61 | 9.07E-02 | 17.82  | 18.87 | 3.45E-01 |
| cg26781726 | 15.70  | 6.63  | 1.78E-02 | 21.32  | 9.64  | 2.70E-02 | 15.97  | 17.49  | 3.61E-01 | 20.91  | 13.04 | 1.09E-01 | -12.27 | 17.56 | 4.85E-01 |
| cg20664445 | 21.29  | 8.99  | 1.78E-02 | 10.16  | 9.49  | 2.85E-01 | 45.51  | 18.50  | 1.39E-02 | 44.69  | 30.51 | 1.43E-01 | 16.78  | 18.69 | 3.69E-01 |
| cg11654904 | -20.43 | 8.62  | 1.78E-02 | -13.47 | 12.94 | 2.98E-01 | -18.44 | 19.76  | 3.51E-01 | -32.07 | 18.99 | 9.13E-02 | -27.14 | 21.61 | 2.09E-01 |
| cg22822599 | -13.91 | 5.87  | 1.78E-02 | -14.10 | 12.88 | 2.74E-01 | -11.50 | 17.79  | 5.18E-01 | -12.34 | 7.94  | 1.20E-01 | -21.86 | 15.90 | 1.69E-01 |
| cg12592365 | -9.69  | 4.09  | 1.78E-02 | -13.49 | 10.49 | 1.99E-01 | -22.07 | 24.37  | 3.65E-01 | -9.16  | 4.84  | 5.83E-02 | -4.48  | 12.60 | 7.22E-01 |
| cg19428602 | 25.08  | 10.59 | 1.78E-02 | 28.40  | 21.09 | 1.78E-01 | 32.93  | 21.81  | 1.31E-01 | 7.81   | 15.49 | 6.14E-01 | 65.94  | 30.66 | 3.15E-02 |
| cg04926767 | 17.23  | 7.28  | 1.78E-02 | 9.52   | 11.83 | 4.21E-01 | 20.93  | 13.54  | 1.22E-01 | 41.70  | 18.21 | 2.20E-02 | 5.37   | 17.48 | 7.59E-01 |
| cg20629387 | 27.27  | 11.51 | 1.78E-02 | 56.56  | 23.20 | 1.48E-02 | 66.23  | 43.01  | 1.24E-01 | 15.74  | 9.07  | 8.27E-02 | 16.63  | 30.81 | 5.89E-01 |
| cg12737228 | -7.42  | 3.13  | 1.79E-02 | -10.76 | 4.32  | 1.29E-02 | -3.91  | 7.12   | 5.83E-01 | 2.00   | 14.11 | 8.87E-01 | -4.81  | 6.52  | 4.60E-01 |
| cg00744866 | 8.59   | 3.63  | 1.79E-02 | 13.88  | 5.25  | 8.24E-03 | 4.48   | 8.40   | 5.94E-01 | 2.14   | 11.67 | 8.54E-01 | 3.89   | 7.39  | 5.99E-01 |
| cg09207077 | -13.79 | 5.82  | 1.79E-02 | -23.72 | 8.59  | 5.75E-03 | -3.48  | 13.71  | 7.99E-01 | -12.13 | 13.92 | 3.83E-01 | -0.75  | 13.53 | 9.56E-01 |
| cg22236890 | -9.28  | 3.92  | 1.79E-02 | -14.40 | 5.66  | 1.09E-02 | -1.68  | 8.55   | 8.44E-01 | 7.42   | 16.06 | 6.44E-01 | -9.82  | 7.82  | 2.09E-01 |
| cg03486157 | 21.49  | 9.07  | 1.79E-02 | 2.79   | 21.99 | 8.99E-01 | 107.17 | 72.93  | 1.42E-01 | 22.89  | 10.60 | 3.09E-02 | 31.63  | 31.67 | 3.18E-01 |
| cg11594498 | 24.05  | 10.15 | 1.79E-02 | 40.15  | 23.59 | 8.87E-02 | 4.86   | 43.17  | 9.10E-01 | 21.90  | 12.70 | 8.47E-02 | 19.50  | 29.32 | 5.06E-01 |
| cg26919780 | -10.24 | 4.32  | 1.79E-02 | -14.69 | 8.38  | 7.95E-02 | -5.07  | 10.96  | 6.44E-01 | -7.04  | 6.47  | 2.76E-01 | -18.15 | 11.90 | 1.27E-01 |
| cg09719031 | 16.95  | 7.16  | 1.79E-02 | 21.55  | 18.16 | 2.36E-01 | 49.00  | 31.19  | 1.16E-01 | 16.72  | 8.42  | 4.70E-02 | -15.51 | 27.31 | 5.70E-01 |
| cg19066682 | -13.60 | 5.74  | 1.79E-02 | -20.61 | 8.55  | 1.59E-02 | -6.31  | 12.32  | 6.09E-01 | -12.36 | 18.35 | 5.01E-01 | -7.35  | 11.87 | 5.36E-01 |
| cg23260254 | -13.28 | 5.61  | 1.79E-02 | -14.43 | 8.14  | 7.63E-02 | -10.75 | 12.90  | 4.05E-01 | -11.50 | 18.78 | 5.40E-01 | -13.64 | 11.26 | 2.26E-01 |
| cg13055685 | 16.65  | 7.03  | 1.79E-02 | 14.46  | 14.69 | 3.25E-01 | 16.49  | 16.29  | 3.11E-01 | 24.79  | 9.53  | 9.30E-03 | -16.26 | 21.33 | 4.46E-01 |

|            |        |       |          |        |       |          |        |        |          |        |       |          |        |       |          |
|------------|--------|-------|----------|--------|-------|----------|--------|--------|----------|--------|-------|----------|--------|-------|----------|
| cg14743291 | 26.13  | 11.03 | 1.79E-02 | 36.75  | 13.75 | 7.55E-03 | -11.25 | 53.93  | 8.35E-01 | 30.53  | 60.08 | 6.11E-01 | 6.86   | 20.82 | 7.42E-01 |
| cg22571135 | -9.13  | 3.86  | 1.79E-02 | -9.44  | 5.56  | 8.95E-02 | -7.24  | 7.52   | 3.36E-01 | 2.34   | 9.19  | 7.99E-01 | -19.82 | 8.10  | 1.44E-02 |
| cg21925465 | -12.21 | 5.15  | 1.79E-02 | -7.42  | 11.90 | 5.33E-01 | -4.74  | 13.32  | 7.22E-01 | -13.84 | 6.98  | 4.74E-02 | -21.77 | 15.04 | 1.48E-01 |
| cg03760518 | 12.51  | 5.28  | 1.79E-02 | 7.06   | 7.72  | 3.60E-01 | 13.08  | 13.86  | 3.45E-01 | 9.43   | 12.49 | 4.50E-01 | 27.04  | 11.59 | 1.96E-02 |
| cg14565764 | -10.30 | 4.35  | 1.79E-02 | -3.29  | 8.38  | 6.94E-01 | -20.18 | 14.64  | 1.68E-01 | -13.72 | 6.27  | 2.85E-02 | -6.36  | 10.87 | 5.59E-01 |
| cg00735923 | 18.35  | 7.75  | 1.79E-02 | 22.98  | 10.15 | 2.36E-02 | 4.18   | 33.44  | 9.00E-01 | 39.68  | 41.03 | 3.34E-01 | 10.12  | 13.54 | 4.55E-01 |
| cg08302300 | 21.22  | 8.96  | 1.79E-02 | 32.42  | 16.11 | 4.42E-02 | 10.61  | 19.64  | 5.89E-01 | 19.76  | 16.49 | 2.31E-01 | 16.81  | 20.68 | 4.16E-01 |
| cg00073650 | 18.87  | 7.97  | 1.79E-02 | 19.19  | 12.74 | 1.32E-01 | 9.45   | 15.82  | 5.50E-01 | 9.07   | 17.92 | 6.13E-01 | 45.72  | 20.12 | 2.31E-02 |
| cg23995169 | 13.70  | 5.79  | 1.79E-02 | 7.76   | 9.20  | 3.99E-01 | 30.20  | 17.14  | 7.81E-02 | 4.99   | 12.36 | 6.86E-01 | 22.46  | 11.10 | 4.31E-02 |
| cg09414156 | -32.41 | 13.69 | 1.79E-02 | -25.75 | 43.14 | 5.51E-01 | 16.39  | 198.50 | 9.34E-01 | -32.82 | 14.86 | 2.72E-02 | -44.07 | 63.23 | 4.86E-01 |
| cg19363546 | 21.09  | 8.91  | 1.79E-02 | 19.68  | 11.88 | 9.77E-02 | 26.37  | 22.12  | 2.33E-01 | -22.79 | 38.83 | 5.57E-01 | 31.13  | 18.85 | 9.86E-02 |
| cg10673839 | 20.29  | 8.57  | 1.79E-02 | 42.44  | 21.61 | 4.96E-02 | 73.10  | 91.65  | 4.25E-01 | 14.99  | 10.08 | 1.37E-01 | 19.21  | 25.63 | 4.53E-01 |
| cg13845094 | 18.00  | 7.60  | 1.79E-02 | 33.74  | 13.20 | 1.06E-02 | -0.01  | 18.50  | 1.00E+00 | 16.16  | 14.61 | 2.69E-01 | 10.67  | 15.90 | 5.02E-01 |
| cg00793648 | 17.90  | 7.56  | 1.79E-02 | 32.24  | 18.01 | 7.33E-02 | -22.54 | 38.92  | 5.63E-01 | 16.26  | 8.94  | 6.90E-02 | 20.26  | 28.35 | 4.75E-01 |
| cg17217195 | 13.71  | 5.79  | 1.79E-02 | 12.43  | 8.61  | 1.49E-01 | 16.12  | 11.20  | 1.50E-01 | 36.59  | 21.57 | 8.99E-02 | 5.49   | 12.67 | 6.65E-01 |
| cg10050157 | 42.32  | 17.87 | 1.79E-02 | 61.16  | 28.58 | 3.23E-02 | 48.33  | 65.34  | 4.59E-01 | 13.10  | 39.48 | 7.40E-01 | 36.74  | 31.16 | 2.38E-01 |
| cg17823004 | 20.52  | 8.67  | 1.79E-02 | 23.78  | 16.55 | 1.51E-01 | 20.24  | 27.41  | 4.60E-01 | 24.24  | 12.48 | 5.20E-02 | 1.94   | 22.89 | 9.32E-01 |
| cg06750524 | -12.10 | 5.11  | 1.79E-02 | -14.04 | 6.92  | 4.24E-02 | -9.80  | 11.36  | 3.88E-01 | 9.64   | 22.09 | 6.62E-01 | -14.97 | 11.48 | 1.92E-01 |
| cg10097651 | 14.29  | 6.04  | 1.79E-02 | 17.92  | 7.86  | 2.26E-02 | 9.48   | 17.24  | 5.82E-01 | 27.69  | 24.84 | 2.65E-01 | 4.05   | 12.63 | 7.49E-01 |
| cg08190450 | 18.02  | 7.61  | 1.79E-02 | 19.23  | 10.65 | 7.10E-02 | 19.31  | 25.57  | 4.50E-01 | 32.50  | 26.54 | 2.21E-01 | 11.98  | 13.49 | 3.75E-01 |
| cg08979895 | 9.56   | 4.04  | 1.79E-02 | 8.31   | 5.85  | 1.55E-01 | 6.28   | 8.12   | 4.39E-01 | 17.07  | 18.43 | 3.54E-01 | 14.11  | 8.45  | 9.47E-02 |
| cg06057715 | -22.81 | 9.64  | 1.79E-02 | -26.93 | 18.63 | 1.48E-01 | -8.23  | 26.53  | 7.56E-01 | -25.38 | 13.82 | 6.62E-02 | -19.02 | 28.54 | 5.05E-01 |
| cg12102702 | 15.92  | 6.73  | 1.79E-02 | 30.22  | 13.40 | 2.42E-02 | 3.57   | 18.91  | 8.50E-01 | 9.52   | 6.80  | 1.61E-01 | 38.89  | 21.62 | 7.20E-02 |
| cg05553511 | 17.37  | 7.34  | 1.79E-02 | 19.74  | 12.25 | 1.07E-01 | 1.71   | 15.00  | 9.09E-01 | 15.71  | 15.52 | 3.11E-01 | 35.62  | 17.35 | 4.00E-02 |
| cg21431338 | 10.96  | 4.63  | 1.79E-02 | 6.85   | 10.09 | 4.97E-01 | 21.32  | 24.44  | 3.83E-01 | 12.35  | 5.66  | 2.90E-02 | 5.70   | 15.95 | 7.21E-01 |
| cg07084627 | 9.88   | 4.18  | 1.79E-02 | 14.47  | 6.19  | 1.93E-02 | 9.95   | 11.18  | 3.74E-01 | -0.95  | 9.95  | 9.24E-01 | 9.04   | 8.73  | 3.00E-01 |
| cg22276612 | -36.16 | 15.28 | 1.79E-02 | -33.05 | 21.01 | 1.16E-01 | -19.10 | 88.85  | 8.30E-01 | -61.31 | 32.77 | 6.14E-02 | -21.36 | 32.26 | 5.08E-01 |
| cg03621504 | 8.43   | 3.56  | 1.79E-02 | 7.76   | 4.62  | 9.31E-02 | 9.56   | 8.15   | 2.41E-01 | 19.39  | 13.38 | 1.47E-01 | 4.29   | 9.41  | 6.48E-01 |
| cg25948690 | -20.60 | 8.70  | 1.80E-02 | -9.55  | 12.90 | 4.59E-01 | -4.96  | 18.25  | 7.86E-01 | -42.66 | 21.31 | 4.53E-02 | -35.17 | 15.66 | 2.47E-02 |
| cg15648729 | -13.63 | 5.76  | 1.80E-02 | -5.79  | 11.89 | 6.26E-01 | -17.70 | 33.95  | 6.02E-01 | -18.87 | 7.08  | 7.75E-03 | 9.32   | 20.93 | 6.56E-01 |
| cg19698789 | -17.30 | 7.31  | 1.80E-02 | -26.87 | 15.34 | 7.99E-02 | 10.00  | 17.58  | 5.70E-01 | -23.30 | 10.09 | 2.09E-02 | -15.02 | 18.58 | 4.19E-01 |
| cg01747665 | 18.27  | 7.72  | 1.80E-02 | 16.34  | 12.97 | 2.08E-01 | 24.78  | 14.22  | 8.13E-02 | 10.75  | 17.26 | 5.34E-01 | 20.01  | 19.84 | 3.13E-01 |
| cg02659794 | -24.56 | 10.38 | 1.80E-02 | -16.57 | 32.24 | 6.07E-01 | 30.31  | 142.06 | 8.31E-01 | -31.50 | 11.79 | 7.56E-03 | 12.00  | 30.42 | 6.93E-01 |
| cg16292768 | 8.02   | 3.39  | 1.80E-02 | 7.66   | 4.44  | 8.41E-02 | 10.17  | 8.40   | 2.26E-01 | 10.39  | 10.32 | 3.14E-01 | 5.28   | 8.85  | 5.50E-01 |
| cg08562099 | 7.90   | 3.34  | 1.80E-02 | 7.52   | 4.42  | 8.90E-02 | 8.08   | 7.77   | 2.98E-01 | 3.43   | 12.40 | 7.82E-01 | 10.82  | 8.03  | 1.78E-01 |

|            |        |       |          |        |       |          |        |        |          |        |       |          |        |       |          |
|------------|--------|-------|----------|--------|-------|----------|--------|--------|----------|--------|-------|----------|--------|-------|----------|
| cg10094886 | -15.80 | 6.68  | 1.80E-02 | -22.84 | 20.19 | 2.58E-01 | -36.00 | 34.94  | 3.03E-01 | -13.97 | 7.43  | 6.00E-02 | -15.09 | 31.05 | 6.27E-01 |
| cg09355528 | -11.36 | 4.80  | 1.80E-02 | -16.94 | 7.78  | 2.96E-02 | -2.53  | 9.03   | 7.79E-01 | -9.69  | 14.03 | 4.90E-01 | -13.91 | 10.22 | 1.73E-01 |
| cg00261832 | -13.64 | 5.76  | 1.80E-02 | -30.71 | 16.28 | 5.92E-02 | 0.82   | 28.25  | 9.77E-01 | -12.56 | 6.57  | 5.59E-02 | -2.43  | 22.97 | 9.16E-01 |
| cg26613367 | -9.09  | 3.84  | 1.80E-02 | -14.17 | 8.63  | 1.01E-01 | 0.80   | 16.17  | 9.61E-01 | -8.82  | 4.97  | 7.59E-02 | -7.12  | 9.97  | 4.75E-01 |
| cg16273961 | 24.88  | 10.52 | 1.80E-02 | 34.00  | 13.80 | 1.37E-02 | 16.29  | 39.42  | 6.79E-01 | 30.44  | 55.40 | 5.83E-01 | 9.20   | 18.83 | 6.25E-01 |
| cg23547348 | 14.53  | 6.14  | 1.80E-02 | 9.92   | 12.76 | 4.37E-01 | 25.84  | 49.95  | 6.05E-01 | 15.91  | 7.70  | 3.88E-02 | 14.76  | 18.04 | 4.13E-01 |
| cg02194396 | 7.25   | 3.06  | 1.80E-02 | 10.72  | 4.10  | 8.89E-03 | 0.44   | 6.91   | 9.49E-01 | 10.02  | 11.74 | 3.94E-01 | 2.76   | 7.29  | 7.05E-01 |
| cg10321339 | -37.93 | 16.03 | 1.80E-02 | -27.98 | 24.69 | 2.57E-01 | -85.74 | 42.62  | 4.43E-02 | -22.13 | 32.29 | 4.93E-01 | -44.93 | 36.79 | 2.22E-01 |
| cg14847095 | 20.01  | 8.46  | 1.80E-02 | 11.97  | 15.27 | 4.33E-01 | 22.19  | 34.64  | 5.22E-01 | 14.54  | 6.82  | 3.29E-02 | 59.34  | 22.22 | 7.57E-03 |
| cg08113562 | 19.22  | 8.13  | 1.80E-02 | 10.07  | 11.61 | 3.86E-01 | 12.95  | 28.35  | 6.48E-01 | 8.09   | 24.48 | 7.41E-01 | 38.79  | 14.41 | 7.10E-03 |
| cg27578869 | 17.49  | 7.39  | 1.80E-02 | 36.78  | 18.97 | 5.25E-02 | 30.24  | 23.22  | 1.93E-01 | 10.19  | 9.01  | 2.58E-01 | 26.70  | 27.13 | 3.25E-01 |
| cg15017604 | 7.68   | 3.25  | 1.80E-02 | 9.57   | 6.52  | 1.42E-01 | 11.95  | 12.55  | 3.41E-01 | 5.41   | 4.25  | 2.03E-01 | 13.28  | 10.18 | 1.92E-01 |
| cg14952266 | -13.49 | 5.70  | 1.80E-02 | -17.68 | 12.23 | 1.48E-01 | -1.53  | 12.16  | 9.00E-01 | -18.07 | 8.54  | 3.43E-02 | -10.71 | 16.73 | 5.22E-01 |
| cg13766830 | -30.12 | 12.73 | 1.80E-02 | -12.38 | 48.35 | 7.98E-01 | -98.24 | 169.49 | 5.62E-01 | -30.22 | 13.61 | 2.64E-02 | -45.28 | 56.91 | 4.26E-01 |
| cg15466977 | 13.16  | 5.57  | 1.80E-02 | 16.99  | 13.86 | 2.20E-01 | 11.68  | 28.50  | 6.82E-01 | 13.09  | 6.37  | 4.00E-02 | -0.04  | 28.51 | 9.99E-01 |
| cg12757676 | 18.39  | 7.78  | 1.80E-02 | 19.58  | 19.77 | 3.22E-01 | 20.00  | 19.93  | 3.16E-01 | 13.90  | 9.81  | 1.56E-01 | 55.15  | 30.51 | 7.06E-02 |
| cg00435526 | 35.46  | 14.99 | 1.80E-02 | 39.06  | 18.23 | 3.21E-02 | 18.64  | 63.91  | 7.71E-01 | -45.26 | 67.23 | 5.01E-01 | 46.90  | 32.06 | 1.43E-01 |
| cg15636887 | -8.56  | 3.62  | 1.80E-02 | -9.23  | 6.05  | 1.27E-01 | -7.26  | 9.79   | 4.58E-01 | -10.76 | 6.40  | 9.24E-02 | -4.43  | 8.38  | 5.97E-01 |
| cg21779954 | -14.71 | 6.22  | 1.80E-02 | -26.99 | 13.26 | 4.18E-02 | -3.19  | 29.83  | 9.15E-01 | -13.44 | 7.91  | 8.92E-02 | -2.72  | 18.08 | 8.80E-01 |
| cg06519449 | 28.85  | 12.20 | 1.80E-02 | -5.65  | 35.41 | 8.73E-01 | 58.94  | 180.51 | 7.44E-01 | 35.80  | 13.50 | 8.01E-03 | 0.57   | 49.41 | 9.91E-01 |
| cg15820809 | 33.49  | 14.16 | 1.80E-02 | 48.83  | 38.73 | 2.07E-01 | 62.24  | 159.25 | 6.96E-01 | 33.06  | 16.03 | 3.91E-02 | 8.58   | 50.62 | 8.65E-01 |
| cg10119679 | 25.14  | 10.63 | 1.80E-02 | 26.00  | 13.41 | 5.25E-02 | 48.74  | 34.27  | 1.55E-01 | 26.03  | 65.15 | 6.90E-01 | 13.74  | 21.34 | 5.20E-01 |
| cg08570691 | -10.70 | 4.52  | 1.80E-02 | -16.59 | 6.61  | 1.21E-02 | -9.84  | 13.60  | 4.69E-01 | -9.58  | 12.10 | 4.28E-01 | -1.81  | 8.52  | 8.32E-01 |
| cg01219549 | -32.40 | 13.70 | 1.80E-02 | -49.22 | 20.41 | 1.59E-02 | -6.84  | 55.16  | 9.01E-01 | -10.30 | 29.93 | 7.31E-01 | -27.48 | 25.96 | 2.90E-01 |
| cg12513880 | 16.34  | 6.91  | 1.80E-02 | 17.65  | 17.46 | 3.12E-01 | 0.67   | 22.93  | 9.77E-01 | 21.73  | 9.34  | 2.00E-02 | 7.89   | 15.25 | 6.05E-01 |
| cg25868998 | 24.06  | 10.17 | 1.80E-02 | 66.93  | 34.60 | 5.31E-02 | -5.64  | 112.14 | 9.60E-01 | 19.23  | 11.10 | 8.33E-02 | 33.00  | 39.63 | 4.05E-01 |
| cg05565809 | 19.47  | 8.23  | 1.80E-02 | 13.63  | 13.79 | 3.23E-01 | 26.22  | 17.29  | 1.29E-01 | 10.69  | 16.53 | 5.18E-01 | 35.63  | 20.03 | 7.53E-02 |
| cg08357990 | 12.89  | 5.45  | 1.81E-02 | 14.78  | 7.43  | 4.68E-02 | 14.40  | 13.52  | 2.87E-01 | 18.91  | 19.35 | 3.28E-01 | 5.00   | 11.60 | 6.67E-01 |
| cg20283670 | 16.99  | 7.18  | 1.81E-02 | 16.92  | 10.33 | 1.02E-01 | 14.15  | 16.11  | 3.80E-01 | 37.47  | 23.28 | 1.08E-01 | 10.91  | 15.23 | 4.74E-01 |
| cg12947757 | 18.05  | 7.63  | 1.81E-02 | 26.46  | 13.84 | 5.58E-02 | 14.71  | 11.75  | 2.10E-01 | 30.46  | 19.19 | 1.12E-01 | -9.05  | 22.51 | 6.88E-01 |
| cg00514713 | -9.76  | 4.13  | 1.81E-02 | -12.36 | 6.19  | 4.56E-02 | -8.95  | 8.48   | 2.91E-01 | -16.30 | 15.25 | 2.85E-01 | -3.83  | 8.36  | 6.46E-01 |
| cg26792080 | 44.57  | 18.85 | 1.81E-02 | 43.25  | 20.04 | 3.10E-02 | 62.23  | 62.12  | 3.16E-01 | -30.15 | 46.19 | 5.14E-01 | 76.36  | 28.22 | 6.81E-03 |
| cg18600211 | 18.94  | 8.01  | 1.81E-02 | 33.77  | 20.30 | 9.63E-02 | 15.12  | 27.23  | 5.79E-01 | 17.98  | 9.63  | 6.18E-02 | -1.14  | 31.29 | 9.71E-01 |
| cg01626493 | -12.39 | 5.24  | 1.81E-02 | -8.19  | 9.91  | 4.09E-01 | -12.34 | 12.69  | 3.31E-01 | -12.73 | 8.65  | 1.41E-01 | -18.23 | 12.29 | 1.38E-01 |
| cg12821632 | -34.72 | 14.69 | 1.81E-02 | -62.51 | 46.22 | 1.76E-01 | 2.51   | 170.01 | 9.88E-01 | -29.45 | 16.35 | 7.18E-02 | -55.01 | 50.35 | 2.75E-01 |

|            |        |       |          |        |       |          |         |        |          |        |       |          |        |       |          |
|------------|--------|-------|----------|--------|-------|----------|---------|--------|----------|--------|-------|----------|--------|-------|----------|
| cg01949002 | -16.89 | 7.15  | 1.81E-02 | -12.14 | 13.52 | 3.69E-01 | -20.93  | 15.22  | 1.69E-01 | -9.49  | 12.27 | 4.39E-01 | -35.23 | 17.81 | 4.80E-02 |
| cg14878852 | -16.10 | 6.81  | 1.81E-02 | -27.70 | 13.09 | 3.44E-02 | -0.26   | 17.17  | 9.88E-01 | -15.16 | 10.40 | 1.45E-01 | -14.42 | 17.99 | 4.23E-01 |
| cg18150280 | -11.07 | 4.68  | 1.81E-02 | -15.00 | 5.74  | 9.03E-03 | 1.15    | 11.88  | 9.23E-01 | 3.58   | 23.88 | 8.81E-01 | -10.03 | 12.46 | 4.21E-01 |
| cg09584188 | -6.89  | 2.91  | 1.81E-02 | -7.35  | 4.36  | 9.16E-02 | -1.76   | 5.74   | 7.59E-01 | -1.63  | 9.17  | 8.59E-01 | -15.39 | 6.62  | 2.01E-02 |
| cg10873086 | -19.11 | 8.09  | 1.81E-02 | -16.32 | 14.22 | 2.51E-01 | -51.80  | 20.01  | 9.63E-03 | -16.92 | 7.97  | 3.37E-02 | 4.87   | 22.21 | 8.27E-01 |
| cg10401017 | 7.57   | 3.20  | 1.81E-02 | 6.65   | 4.47  | 1.36E-01 | 17.45   | 6.23   | 5.12E-03 | 3.88   | 5.14  | 4.51E-01 | 0.21   | 9.81  | 9.83E-01 |
| cg27341472 | 15.42  | 6.52  | 1.81E-02 | 12.97  | 11.18 | 2.46E-01 | 1.36    | 23.89  | 9.55E-01 | 19.96  | 9.87  | 4.31E-02 | 14.76  | 16.99 | 3.85E-01 |
| cg11510931 | 13.36  | 5.65  | 1.81E-02 | 16.68  | 8.97  | 6.30E-02 | 21.10   | 12.68  | 9.61E-02 | 6.76   | 10.59 | 5.23E-01 | 5.18   | 16.39 | 7.52E-01 |
| cg21407899 | 15.52  | 6.57  | 1.81E-02 | 14.87  | 9.10  | 1.02E-01 | 26.41   | 14.83  | 7.49E-02 | -16.26 | 36.18 | 6.53E-01 | 12.53  | 13.14 | 3.40E-01 |
| cg01397057 | 31.38  | 13.28 | 1.81E-02 | 31.28  | 16.90 | 6.41E-02 | 102.39  | 85.69  | 2.32E-01 | 71.05  | 52.85 | 1.79E-01 | 17.35  | 24.43 | 4.78E-01 |
| cg16934969 | -9.32  | 3.94  | 1.81E-02 | -9.05  | 7.03  | 1.98E-01 | -4.18   | 9.63   | 6.64E-01 | -8.88  | 6.59  | 1.78E-01 | -16.17 | 9.84  | 1.00E-01 |
| cg01889070 | 33.37  | 14.12 | 1.81E-02 | 37.15  | 18.03 | 3.94E-02 | 39.14   | 45.81  | 3.93E-01 | 32.06  | 49.83 | 5.20E-01 | 20.31  | 30.68 | 5.08E-01 |
| cg17406383 | 11.74  | 4.97  | 1.81E-02 | 16.71  | 7.83  | 3.29E-02 | 16.78   | 12.58  | 1.82E-01 | 9.42   | 9.17  | 3.04E-01 | -2.50  | 12.93 | 8.47E-01 |
| cg21545605 | 14.51  | 6.14  | 1.81E-02 | 8.75   | 9.05  | 3.34E-01 | 31.57   | 12.78  | 1.35E-02 | 16.57  | 18.64 | 3.74E-01 | 6.98   | 13.71 | 6.11E-01 |
| cg21769006 | 13.45  | 5.69  | 1.81E-02 | 17.41  | 8.07  | 3.11E-02 | 11.86   | 12.17  | 3.30E-01 | 13.93  | 14.46 | 3.35E-01 | 0.40   | 15.81 | 9.80E-01 |
| cg25875953 | 17.46  | 7.39  | 1.81E-02 | 18.41  | 19.32 | 3.41E-01 | 21.48   | 18.99  | 2.58E-01 | 12.29  | 9.44  | 1.93E-01 | 44.32  | 24.61 | 7.17E-02 |
| cg04680037 | 47.94  | 20.28 | 1.81E-02 | 46.08  | 26.42 | 8.11E-02 | 27.71   | 71.41  | 6.98E-01 | 23.85  | 71.20 | 7.38E-01 | 66.78  | 40.70 | 1.01E-01 |
| cg04441405 | 14.28  | 6.04  | 1.81E-02 | 4.29   | 8.83  | 6.27E-01 | 33.87   | 16.18  | 3.63E-02 | 28.33  | 27.02 | 2.94E-01 | 16.97  | 9.60  | 7.72E-02 |
| cg05306107 | -12.90 | 5.46  | 1.81E-02 | -14.80 | 13.47 | 2.72E-01 | -7.93   | 16.83  | 6.37E-01 | -12.04 | 6.85  | 7.89E-02 | -20.94 | 17.74 | 2.38E-01 |
| cg18511798 | -22.00 | 9.31  | 1.81E-02 | -29.28 | 12.07 | 1.53E-02 | -9.65   | 26.13  | 7.12E-01 | -6.93  | 32.40 | 8.31E-01 | -14.24 | 21.06 | 4.99E-01 |
| cg07118196 | 25.99  | 11.00 | 1.81E-02 | 45.08  | 17.50 | 9.99E-03 | 11.86   | 19.14  | 5.35E-01 | 10.43  | 13.12 | 4.27E-01 | 57.73  | 28.13 | 4.01E-02 |
| cg11230343 | -18.87 | 7.98  | 1.81E-02 | -15.00 | 17.57 | 3.93E-01 | -13.98  | 88.74  | 8.75E-01 | -14.97 | 9.73  | 1.24E-01 | -49.76 | 23.87 | 3.71E-02 |
| cg21241411 | 12.85  | 5.44  | 1.81E-02 | 10.76  | 8.37  | 1.99E-01 | 13.48   | 10.46  | 1.98E-01 | 5.74   | 12.45 | 6.44E-01 | 30.53  | 15.90 | 5.49E-02 |
| cg03919694 | 20.75  | 8.78  | 1.81E-02 | 70.28  | 33.73 | 3.72E-02 | -2.70   | 43.90  | 9.51E-01 | 17.30  | 10.03 | 8.46E-02 | 22.50  | 24.74 | 3.63E-01 |
| cg11482099 | 31.64  | 13.39 | 1.81E-02 | 28.66  | 18.41 | 1.19E-01 | 15.85   | 41.96  | 7.06E-01 | 42.62  | 36.49 | 2.43E-01 | 38.94  | 27.69 | 1.60E-01 |
| cg15485556 | 30.53  | 12.92 | 1.81E-02 | 14.72  | 32.70 | 6.53E-01 | 18.91   | 94.10  | 8.41E-01 | 35.18  | 15.11 | 1.99E-02 | 22.99  | 42.23 | 5.86E-01 |
| cg07999953 | -12.52 | 5.30  | 1.81E-02 | -27.47 | 11.96 | 2.16E-02 | 5.93    | 17.88  | 7.40E-01 | -10.37 | 6.87  | 1.31E-01 | -12.23 | 15.29 | 4.24E-01 |
| cg01310120 | 20.18  | 8.54  | 1.81E-02 | 22.21  | 10.98 | 4.32E-02 | 32.88   | 18.81  | 8.05E-02 | 36.12  | 18.19 | 4.70E-02 | -4.34  | 15.36 | 7.77E-01 |
| cg19193956 | 18.46  | 7.81  | 1.81E-02 | 19.66  | 10.72 | 6.65E-02 | 33.57   | 24.88  | 1.77E-01 | 41.93  | 32.91 | 2.03E-01 | 7.44   | 13.95 | 5.94E-01 |
| cg20361600 | 33.44  | 14.15 | 1.82E-02 | 31.63  | 36.23 | 3.83E-01 | -161.32 | 155.75 | 3.00E-01 | 32.42  | 16.32 | 4.70E-02 | 63.79  | 47.93 | 1.83E-01 |
| cg01692482 | -9.15  | 3.87  | 1.82E-02 | -13.88 | 5.63  | 1.37E-02 | -8.67   | 9.47   | 3.60E-01 | -8.46  | 11.83 | 4.74E-01 | -0.90  | 7.71  | 9.07E-01 |
| cg17284384 | 29.42  | 12.46 | 1.82E-02 | 56.33  | 38.60 | 1.44E-01 | 72.84   | 217.52 | 7.38E-01 | 26.55  | 13.58 | 5.06E-02 | 19.17  | 54.96 | 7.27E-01 |
| cg14425843 | 17.41  | 7.37  | 1.82E-02 | 7.51   | 16.32 | 6.45E-01 | -13.99  | 29.86  | 6.39E-01 | 21.59  | 9.19  | 1.88E-02 | 31.10  | 24.43 | 2.03E-01 |
| cg13582001 | -17.74 | 7.51  | 1.82E-02 | -7.68  | 14.08 | 5.86E-01 | -22.85  | 25.35  | 3.67E-01 | -21.64 | 11.44 | 5.86E-02 | -21.50 | 16.96 | 2.05E-01 |
| cg10042132 | -14.78 | 6.26  | 1.82E-02 | -22.57 | 17.73 | 2.03E-01 | -69.73  | 38.86  | 7.27E-02 | -11.64 | 6.98  | 9.56E-02 | -17.32 | 28.80 | 5.48E-01 |



|            |        |       |          |        |       |          |         |        |          |         |       |          |        |       |          |
|------------|--------|-------|----------|--------|-------|----------|---------|--------|----------|---------|-------|----------|--------|-------|----------|
| cg10032387 | 20.47  | 8.66  | 1.82E-02 | 26.45  | 12.91 | 4.05E-02 | 22.51   | 21.51  | 2.95E-01 | -5.20   | 31.97 | 8.71E-01 | 16.83  | 15.47 | 2.77E-01 |
| cg22501342 | 14.67  | 6.21  | 1.82E-02 | 16.97  | 8.70  | 5.12E-02 | 14.89   | 16.38  | 3.63E-01 | -15.57  | 20.15 | 4.40E-01 | 21.34  | 12.39 | 8.51E-02 |
| cg16104450 | 11.00  | 4.66  | 1.82E-02 | 12.41  | 6.42  | 5.35E-02 | 25.22   | 10.88  | 2.04E-02 | 1.84    | 11.37 | 8.71E-01 | 1.89   | 10.60 | 8.59E-01 |
| cg10996201 | -34.91 | 14.78 | 1.82E-02 | -25.21 | 53.36 | 6.37E-01 | -128.94 | 181.35 | 4.77E-01 | -35.03  | 16.21 | 3.07E-02 | -35.06 | 50.51 | 4.88E-01 |
| cg08364561 | 11.52  | 4.88  | 1.82E-02 | -1.88  | 13.01 | 8.85E-01 | 11.37   | 20.53  | 5.80E-01 | 12.60   | 6.35  | 4.72E-02 | 17.39  | 10.56 | 9.98E-02 |
| cg25408314 | -28.13 | 11.91 | 1.82E-02 | -18.56 | 16.00 | 2.46E-01 | -14.08  | 32.18  | 6.62E-01 | -8.71   | 66.63 | 8.96E-01 | -56.46 | 22.63 | 1.26E-02 |
| cg19949550 | -14.25 | 6.03  | 1.82E-02 | -22.97 | 14.72 | 1.18E-01 | -36.73  | 18.20  | 4.36E-02 | -7.35   | 7.57  | 3.32E-01 | -19.29 | 20.38 | 3.44E-01 |
| cg06074896 | 14.70  | 6.22  | 1.82E-02 | 10.90  | 8.56  | 2.03E-01 | 26.72   | 15.29  | 8.06E-02 | 36.51   | 20.60 | 7.63E-02 | 5.50   | 13.44 | 6.83E-01 |
| cg08127369 | 15.27  | 6.47  | 1.82E-02 | 11.33  | 15.64 | 4.69E-01 | 2.40    | 26.27  | 9.27E-01 | 17.46   | 7.71  | 2.35E-02 | 13.90  | 25.55 | 5.87E-01 |
| cg12761282 | -10.11 | 4.28  | 1.82E-02 | -20.06 | 11.39 | 7.81E-02 | -14.83  | 24.09  | 5.38E-01 | -8.14   | 5.01  | 1.04E-01 | -8.89  | 13.77 | 5.19E-01 |
| cg21767402 | -43.75 | 18.53 | 1.82E-02 | -47.71 | 24.79 | 5.43E-02 | -7.51   | 49.17  | 8.79E-01 | -33.41  | 63.90 | 6.01E-01 | -61.44 | 39.94 | 1.24E-01 |
| cg04170948 | -11.82 | 5.00  | 1.82E-02 | -20.31 | 10.36 | 4.99E-02 | -16.85  | 15.79  | 2.86E-01 | -4.65   | 6.94  | 5.03E-01 | -20.23 | 13.06 | 1.21E-01 |
| cg15582789 | 12.47  | 5.28  | 1.82E-02 | 21.18  | 7.13  | 2.97E-03 | 5.31    | 13.55  | 6.95E-01 | 10.84   | 18.08 | 5.49E-01 | 1.03   | 9.83  | 9.16E-01 |
| cg24898236 | -15.75 | 6.67  | 1.82E-02 | -6.80  | 12.60 | 5.89E-01 | -8.05   | 17.21  | 6.40E-01 | -22.68  | 11.83 | 5.52E-02 | -21.51 | 13.27 | 1.05E-01 |
| cg08096684 | 46.26  | 19.59 | 1.82E-02 | 29.46  | 25.45 | 2.47E-01 | 187.06  | 116.79 | 1.09E-01 | 41.22   | 50.59 | 4.15E-01 | 75.68  | 40.90 | 6.43E-02 |
| cg13903917 | -74.96 | 31.74 | 1.82E-02 | -80.75 | 42.10 | 5.51E-02 | 220.56  | 185.20 | 2.34E-01 | -112.94 | 81.06 | 1.64E-01 | -73.20 | 63.66 | 2.50E-01 |
| cg12967902 | -18.96 | 8.03  | 1.82E-02 | -20.53 | 11.49 | 7.39E-02 | 3.53    | 20.04  | 8.60E-01 | -41.04  | 22.05 | 6.28E-02 | -18.59 | 17.20 | 2.80E-01 |
| cg08922547 | -11.73 | 4.97  | 1.82E-02 | -23.57 | 13.34 | 7.73E-02 | -2.76   | 14.68  | 8.51E-01 | -12.42  | 6.18  | 4.45E-02 | -1.26  | 15.60 | 9.36E-01 |
| cg23860321 | 24.79  | 10.50 | 1.82E-02 | 23.07  | 11.78 | 5.03E-02 | 82.26   | 58.98  | 1.63E-01 | 3.67    | 74.81 | 9.61E-01 | 24.52  | 26.66 | 3.58E-01 |
| cg27175851 | -11.54 | 4.89  | 1.82E-02 | -4.87  | 11.49 | 6.72E-01 | 10.45   | 25.04  | 6.77E-01 | -13.80  | 5.79  | 1.71E-02 | -17.90 | 18.79 | 3.41E-01 |
| cg06685968 | 34.22  | 14.49 | 1.82E-02 | 16.45  | 19.90 | 4.08E-01 | 7.76    | 102.04 | 9.39E-01 | 84.96   | 53.06 | 1.09E-01 | 50.70  | 23.68 | 3.23E-02 |
| cg11009590 | -33.53 | 14.20 | 1.82E-02 | -32.05 | 17.17 | 6.19E-02 | -49.04  | 57.91  | 3.97E-01 | -119.87 | 67.89 | 7.75E-02 | -16.07 | 30.87 | 6.03E-01 |
| cg10521567 | -23.71 | 10.04 | 1.82E-02 | -51.95 | 20.72 | 1.22E-02 | 12.00   | 41.60  | 7.73E-01 | -23.02  | 8.18  | 4.90E-03 | 6.30   | 29.95 | 8.33E-01 |
| cg03711675 | -14.80 | 6.27  | 1.82E-02 | -5.64  | 12.50 | 6.52E-01 | -4.30   | 31.47  | 8.91E-01 | -22.99  | 8.32  | 5.73E-03 | -1.18  | 16.65 | 9.44E-01 |
| cg15304928 | 44.44  | 18.82 | 1.82E-02 | 28.71  | 23.85 | 2.29E-01 | -3.24   | 94.85  | 9.73E-01 | 120.80  | 96.21 | 2.09E-01 | 73.68  | 34.40 | 3.22E-02 |
| cg22897130 | 29.05  | 12.30 | 1.82E-02 | 20.44  | 20.04 | 3.08E-01 | 0.49    | 38.17  | 9.90E-01 | 28.14   | 21.42 | 1.89E-01 | 63.50  | 28.30 | 2.49E-02 |
| cg11258381 | -9.50  | 4.02  | 1.82E-02 | -7.58  | 5.82  | 1.93E-01 | -16.26  | 9.16   | 7.60E-02 | -11.77  | 13.02 | 3.66E-01 | -6.92  | 8.30  | 4.04E-01 |
| cg10620680 | 8.99   | 3.81  | 1.82E-02 | 10.67  | 5.12  | 3.71E-02 | 11.18   | 8.92   | 2.10E-01 | 8.93    | 16.89 | 5.97E-01 | 2.78   | 8.24  | 7.36E-01 |
| cg00874032 | 11.21  | 4.75  | 1.83E-02 | 11.16  | 6.66  | 9.38E-02 | 17.57   | 9.67   | 6.91E-02 | 0.97    | 13.79 | 9.44E-01 | 8.97   | 13.13 | 4.94E-01 |
| cg05874270 | -8.47  | 3.59  | 1.83E-02 | -8.00  | 5.10  | 1.17E-01 | -4.15   | 9.87   | 6.74E-01 | -17.81  | 9.34  | 5.66E-02 | -5.92  | 7.58  | 4.35E-01 |
| cg01062116 | -19.49 | 8.26  | 1.83E-02 | -33.05 | 12.73 | 9.44E-03 | 8.30    | 17.82  | 6.41E-01 | -19.18  | 14.85 | 1.97E-01 | -23.20 | 15.74 | 1.41E-01 |
| cg14287724 | -8.75  | 3.71  | 1.83E-02 | -8.18  | 5.59  | 1.44E-01 | -11.64  | 6.84   | 8.88E-02 | -5.96   | 9.31  | 5.22E-01 | -7.35  | 11.32 | 5.16E-01 |
| cg23429847 | -60.24 | 25.52 | 1.83E-02 | -9.62  | 64.90 | 8.82E-01 | -434.52 | 245.22 | 7.64E-02 | -57.80  | 26.07 | 2.66E-02 | -93.08 | 63.25 | 1.41E-01 |
| cg21840806 | -13.13 | 5.56  | 1.83E-02 | -7.97  | 13.48 | 5.55E-01 | 4.05    | 32.13  | 9.00E-01 | -14.94  | 6.67  | 2.50E-02 | -14.41 | 17.28 | 4.04E-01 |
| cg03858663 | -9.66  | 4.09  | 1.83E-02 | -20.38 | 10.20 | 4.57E-02 | -6.26   | 13.26  | 6.37E-01 | -8.49   | 5.06  | 9.34E-02 | -2.55  | 13.64 | 8.52E-01 |

|            |        |       |          |        |       |          |         |        |          |        |       |          |         |       |          |
|------------|--------|-------|----------|--------|-------|----------|---------|--------|----------|--------|-------|----------|---------|-------|----------|
| cg15523958 | 15.50  | 6.57  | 1.83E-02 | 22.60  | 9.16  | 1.36E-02 | -1.41   | 19.56  | 9.42E-01 | 43.59  | 28.49 | 1.26E-01 | 5.99    | 11.31 | 5.97E-01 |
| cg16848524 | 12.65  | 5.36  | 1.83E-02 | -1.29  | 13.01 | 9.21E-01 | 22.84   | 15.23  | 1.34E-01 | 12.66  | 8.55  | 1.39E-01 | 16.14   | 9.57  | 9.16E-02 |
| cg21702497 | -32.64 | 13.83 | 1.83E-02 | -23.14 | 14.72 | 1.16E-01 | -1.11   | 26.42  | 9.67E-01 | -76.50 | 31.37 | 1.47E-02 | -50.77  | 26.69 | 5.71E-02 |
| cg15660353 | 15.22  | 6.45  | 1.83E-02 | 15.82  | 10.40 | 1.28E-01 | 8.11    | 12.98  | 5.32E-01 | 20.78  | 14.01 | 1.38E-01 | 17.40   | 16.27 | 2.85E-01 |
| cg17344770 | 5.64   | 2.39  | 1.83E-02 | 5.81   | 3.03  | 5.52E-02 | 10.14   | 6.58   | 1.23E-01 | 8.27   | 7.58  | 2.75E-01 | -0.99   | 6.29  | 8.75E-01 |
| cg11832395 | -9.60  | 4.07  | 1.83E-02 | -11.13 | 6.17  | 7.10E-02 | -8.08   | 9.50   | 3.95E-01 | -14.92 | 10.42 | 1.52E-01 | -4.36   | 8.50  | 6.08E-01 |
| cg09507697 | 20.79  | 8.81  | 1.83E-02 | 29.57  | 20.16 | 1.42E-01 | 22.06   | 35.61  | 5.36E-01 | 15.49  | 10.89 | 1.55E-01 | 39.31   | 28.92 | 1.74E-01 |
| cg01426475 | -13.36 | 5.66  | 1.83E-02 | -26.83 | 11.41 | 1.88E-02 | -0.52   | 16.41  | 9.75E-01 | -7.57  | 8.20  | 3.56E-01 | -19.56  | 14.25 | 1.70E-01 |
| cg23349767 | 25.39  | 10.76 | 1.83E-02 | 57.17  | 21.02 | 6.53E-03 | 27.19   | 25.78  | 2.92E-01 | 11.28  | 11.79 | 3.38E-01 | 24.69   | 28.56 | 3.87E-01 |
| cg10063575 | -12.34 | 5.23  | 1.83E-02 | -18.64 | 9.99  | 6.20E-02 | -8.37   | 14.24  | 5.57E-01 | -7.32  | 8.03  | 3.62E-01 | -17.92  | 12.78 | 1.61E-01 |
| cg05205152 | 45.92  | 19.46 | 1.83E-02 | 17.45  | 52.60 | 7.40E-01 | 63.09   | 202.21 | 7.55E-01 | 57.45  | 22.23 | 9.76E-03 | -12.33  | 65.80 | 8.51E-01 |
| cg15188623 | 7.48   | 3.17  | 1.83E-02 | 6.46   | 4.14  | 1.19E-01 | 11.28   | 6.55   | 8.51E-02 | 10.54  | 13.97 | 4.51E-01 | 3.99    | 8.84  | 6.52E-01 |
| cg00456326 | 9.60   | 4.07  | 1.83E-02 | 3.87   | 5.14  | 4.51E-01 | 6.88    | 7.13   | 3.34E-01 | 21.98  | 14.07 | 1.18E-01 | 19.08   | 7.70  | 1.32E-02 |
| cg03102516 | -12.59 | 5.34  | 1.83E-02 | -3.83  | 8.84  | 6.65E-01 | -23.36  | 18.04  | 1.95E-01 | -19.60 | 6.66  | 3.26E-03 | 2.35    | 15.70 | 8.81E-01 |
| cg10460003 | -12.97 | 5.50  | 1.83E-02 | -9.24  | 8.67  | 2.86E-01 | -20.43  | 32.59  | 5.31E-01 | -13.36 | 8.62  | 1.21E-01 | -19.98  | 13.68 | 1.44E-01 |
| cg13385203 | 15.22  | 6.45  | 1.83E-02 | 12.43  | 9.46  | 1.89E-01 | 15.32   | 13.45  | 2.55E-01 | 23.81  | 16.74 | 1.55E-01 | 15.18   | 16.27 | 3.51E-01 |
| cg18990313 | 10.79  | 4.57  | 1.83E-02 | 11.67  | 7.34  | 1.12E-01 | 9.91    | 12.47  | 4.27E-01 | 13.32  | 8.74  | 1.27E-01 | 6.28    | 10.13 | 5.35E-01 |
| cg14377720 | -7.15  | 3.03  | 1.83E-02 | -6.69  | 5.49  | 2.23E-01 | -11.29  | 8.32   | 1.75E-01 | -7.03  | 4.77  | 1.40E-01 | -4.87   | 7.61  | 5.22E-01 |
| cg23748172 | -62.18 | 26.36 | 1.83E-02 | -76.54 | 38.69 | 4.79E-02 | 63.28   | 106.53 | 5.53E-01 | -38.51 | 45.93 | 4.02E-01 | -122.80 | 69.14 | 7.57E-02 |
| cg04446777 | 21.46  | 9.10  | 1.83E-02 | 28.04  | 28.37 | 3.23E-01 | -7.99   | 94.04  | 9.32E-01 | 24.58  | 9.96  | 1.36E-02 | -35.04  | 39.48 | 3.75E-01 |
| cg09659197 | 14.36  | 6.09  | 1.83E-02 | 15.43  | 16.01 | 3.35E-01 | -14.33  | 25.93  | 5.81E-01 | 15.09  | 7.14  | 3.45E-02 | 26.67   | 22.57 | 2.37E-01 |
| cg07182965 | 39.36  | 16.68 | 1.83E-02 | 65.05  | 48.25 | 1.78E-01 | -297.07 | 259.00 | 2.51E-01 | 38.03  | 18.42 | 3.89E-02 | 28.87   | 70.74 | 6.83E-01 |
| cg08690200 | -42.74 | 18.12 | 1.83E-02 | -22.60 | 41.14 | 5.83E-01 | -82.05  | 74.55  | 2.71E-01 | -53.07 | 22.53 | 1.85E-02 | 7.98    | 57.15 | 8.89E-01 |
| cg07285760 | -15.60 | 6.61  | 1.83E-02 | -2.47  | 11.50 | 8.30E-01 | -11.02  | 19.61  | 5.74E-01 | -25.09 | 9.60  | 8.94E-03 | -20.04  | 23.30 | 3.90E-01 |
| cg27604145 | 7.37   | 3.12  | 1.83E-02 | 8.07   | 4.53  | 7.48E-02 | 13.83   | 7.07   | 5.05E-02 | 7.98   | 9.51  | 4.01E-01 | -0.14   | 6.64  | 9.83E-01 |
| cg16015924 | 20.55  | 8.71  | 1.83E-02 | 48.12  | 21.34 | 2.41E-02 | 24.38   | 59.46  | 6.82E-01 | 12.97  | 10.20 | 2.04E-01 | 30.90   | 30.32 | 3.08E-01 |
| cg17053085 | -20.54 | 8.71  | 1.83E-02 | -38.57 | 15.30 | 1.17E-02 | -17.26  | 23.47  | 4.62E-01 | -8.64  | 14.81 | 5.59E-01 | -13.94  | 19.84 | 4.82E-01 |
| cg23415212 | 19.24  | 8.16  | 1.83E-02 | 28.48  | 15.09 | 5.91E-02 | -5.97   | 51.80  | 9.08E-01 | 13.84  | 11.07 | 2.11E-01 | 25.34   | 21.79 | 2.45E-01 |
| cg27085741 | 16.84  | 7.14  | 1.83E-02 | 49.66  | 31.21 | 1.12E-01 | -39.95  | 107.27 | 7.10E-01 | 13.88  | 7.73  | 7.26E-02 | 28.71   | 23.84 | 2.29E-01 |
| cg07576632 | 7.24   | 3.07  | 1.83E-02 | 3.82   | 5.47  | 4.85E-01 | 3.48    | 9.55   | 7.16E-01 | 9.42   | 4.57  | 3.93E-02 | 10.98   | 8.52  | 1.97E-01 |
| cg06903384 | 27.51  | 11.66 | 1.83E-02 | 24.04  | 15.78 | 1.28E-01 | 38.95   | 51.36  | 4.48E-01 | 44.31  | 43.93 | 3.13E-01 | 27.87   | 20.25 | 1.69E-01 |
| cg02343823 | 7.26   | 3.08  | 1.84E-02 | 10.20  | 4.69  | 2.98E-02 | 7.14    | 6.96   | 3.05E-01 | 10.12  | 8.06  | 2.09E-01 | 0.02    | 6.43  | 9.98E-01 |
| cg22328396 | 8.29   | 3.52  | 1.84E-02 | 7.27   | 5.40  | 1.78E-01 | 17.69   | 11.33  | 1.19E-01 | 8.29   | 6.62  | 2.10E-01 | 5.91    | 7.92  | 4.56E-01 |
| cg25045127 | -48.96 | 20.76 | 1.84E-02 | -18.16 | 68.78 | 7.92E-01 | 98.18   | 238.17 | 6.80E-01 | -61.89 | 22.90 | 6.88E-03 | 35.41   | 73.70 | 6.31E-01 |
| cg02592473 | 19.10  | 8.10  | 1.84E-02 | 27.91  | 21.44 | 1.93E-01 | 7.45    | 27.20  | 7.84E-01 | 16.75  | 9.74  | 8.56E-02 | 36.92   | 28.94 | 2.02E-01 |

|            |        |       |          |        |       |          |         |        |          |        |       |          |        |       |          |
|------------|--------|-------|----------|--------|-------|----------|---------|--------|----------|--------|-------|----------|--------|-------|----------|
| cg13774342 | -9.88  | 4.19  | 1.84E-02 | -6.51  | 11.33 | 5.65E-01 | -8.39   | 23.46  | 7.20E-01 | -7.76  | 4.93  | 1.15E-01 | -28.91 | 12.78 | 2.37E-02 |
| cg11967675 | -27.06 | 11.48 | 1.84E-02 | 1.04   | 33.90 | 9.75E-01 | -141.78 | 176.30 | 4.21E-01 | -29.44 | 12.84 | 2.19E-02 | -37.20 | 39.97 | 3.52E-01 |
| cg15717719 | -37.84 | 16.05 | 1.84E-02 | -16.29 | 15.22 | 2.84E-01 | -87.52  | 39.85  | 2.81E-02 | -24.01 | 30.33 | 4.29E-01 | -66.48 | 30.04 | 2.69E-02 |
| cg11658419 | 8.46   | 3.59  | 1.84E-02 | 15.21  | 5.10  | 2.86E-03 | 3.13    | 8.66   | 7.18E-01 | 5.54   | 8.50  | 5.15E-01 | 1.30   | 7.39  | 8.61E-01 |
| cg03935956 | 14.11  | 5.99  | 1.84E-02 | 16.39  | 8.87  | 6.45E-02 | 21.06   | 12.81  | 1.00E-01 | 0.61   | 14.72 | 9.67E-01 | 12.11  | 14.93 | 4.17E-01 |
| cg23627948 | -3.68  | 1.56  | 1.84E-02 | -4.40  | 2.11  | 3.67E-02 | -1.04   | 3.38   | 7.58E-01 | 1.96   | 6.02  | 7.45E-01 | -6.86  | 3.77  | 6.88E-02 |
| cg20385216 | 9.86   | 4.18  | 1.84E-02 | 10.42  | 5.97  | 8.09E-02 | 13.25   | 10.82  | 2.21E-01 | 18.46  | 11.36 | 1.04E-01 | 1.18   | 8.83  | 8.94E-01 |
| cg15363887 | 21.09  | 8.95  | 1.84E-02 | 39.29  | 16.94 | 2.04E-02 | -1.14   | 28.05  | 9.68E-01 | 19.30  | 12.83 | 1.32E-01 | 6.49   | 24.54 | 7.91E-01 |
| cg06479755 | -62.59 | 26.55 | 1.84E-02 | -50.19 | 70.18 | 4.74E-01 | -301.49 | 303.71 | 3.21E-01 | -75.71 | 31.44 | 1.60E-02 | 6.31   | 71.87 | 9.30E-01 |
| cg07061426 | -17.08 | 7.25  | 1.84E-02 | -14.61 | 15.90 | 3.58E-01 | 1.30    | 38.46  | 9.73E-01 | -20.41 | 8.57  | 1.72E-02 | 11.94  | 35.48 | 7.37E-01 |
| cg07337598 | 15.62  | 6.63  | 1.84E-02 | 20.45  | 11.85 | 8.43E-02 | 11.15   | 15.45  | 4.70E-01 | 10.95  | 10.26 | 2.86E-01 | 30.17  | 22.55 | 1.81E-01 |
| cg15986030 | -10.61 | 4.50  | 1.84E-02 | -6.41  | 7.14  | 3.70E-01 | -16.25  | 9.72   | 9.46E-02 | -1.65  | 11.24 | 8.83E-01 | -18.93 | 9.43  | 4.46E-02 |
| cg16217510 | -9.68  | 4.10  | 1.84E-02 | -13.10 | 5.63  | 1.99E-02 | -8.51   | 10.76  | 4.29E-01 | -6.26  | 14.83 | 6.73E-01 | -4.01  | 8.28  | 6.28E-01 |
| cg20745153 | 20.48  | 8.69  | 1.84E-02 | 34.41  | 17.17 | 4.51E-02 | 11.83   | 16.14  | 4.64E-01 | 13.31  | 15.98 | 4.05E-01 | 27.18  | 21.83 | 2.13E-01 |
| cg26872028 | -48.52 | 20.58 | 1.84E-02 | -49.71 | 24.39 | 4.16E-02 | 19.77   | 100.67 | 8.44E-01 | -70.08 | 87.67 | 4.24E-01 | -52.84 | 47.11 | 2.62E-01 |
| cg10477073 | 44.79  | 19.00 | 1.84E-02 | 37.66  | 27.76 | 1.75E-01 | 77.08   | 81.10  | 3.42E-01 | 43.99  | 47.91 | 3.59E-01 | 50.08  | 33.61 | 1.36E-01 |
| cg05376185 | 13.82  | 5.86  | 1.84E-02 | 22.13  | 9.60  | 2.12E-02 | 12.35   | 13.53  | 3.61E-01 | 15.39  | 11.99 | 1.99E-01 | -2.13  | 13.08 | 8.71E-01 |
| cg00495658 | -10.99 | 4.66  | 1.84E-02 | -11.85 | 6.96  | 8.87E-02 | -14.61  | 12.59  | 2.46E-01 | -4.14  | 10.91 | 7.04E-01 | -12.57 | 9.68  | 1.94E-01 |
| cg02054108 | 5.60   | 2.38  | 1.84E-02 | 4.07   | 3.59  | 2.57E-01 | 12.12   | 6.13   | 4.80E-02 | 6.96   | 4.21  | 9.82E-02 | -2.47  | 7.85  | 7.53E-01 |
| cg00369640 | 24.99  | 10.60 | 1.84E-02 | 16.86  | 14.67 | 2.50E-01 | 36.24   | 25.67  | 1.58E-01 | 40.17  | 39.01 | 3.03E-01 | 30.19  | 21.98 | 1.70E-01 |
| cg20849109 | 8.58   | 3.64  | 1.84E-02 | 9.69   | 5.04  | 5.46E-02 | 12.18   | 8.76   | 1.65E-01 | 12.86  | 11.69 | 2.72E-01 | 0.87   | 7.96  | 9.13E-01 |
| cg14891209 | 17.41  | 7.39  | 1.84E-02 | 4.06   | 30.74 | 8.95E-01 | 42.57   | 57.40  | 4.58E-01 | 20.93  | 8.07  | 9.50E-03 | -12.08 | 24.89 | 6.27E-01 |
| cg09330596 | 11.74  | 4.98  | 1.84E-02 | 12.09  | 7.56  | 1.10E-01 | 17.74   | 11.00  | 1.07E-01 | 13.65  | 10.48 | 1.93E-01 | -1.68  | 13.56 | 9.01E-01 |
| cg08608532 | -41.31 | 17.53 | 1.84E-02 | -37.21 | 43.21 | 3.89E-01 | -332.99 | 210.35 | 1.13E-01 | -50.37 | 23.09 | 2.92E-02 | -15.27 | 34.88 | 6.62E-01 |
| cg23210049 | 24.86  | 10.55 | 1.84E-02 | 54.12  | 26.14 | 3.84E-02 | -31.57  | 73.91  | 6.69E-01 | 22.35  | 12.45 | 7.26E-02 | 6.49   | 33.63 | 8.47E-01 |
| cg14415885 | 16.94  | 7.19  | 1.84E-02 | -1.25  | 24.91 | 9.60E-01 | 11.28   | 91.63  | 9.02E-01 | 17.40  | 7.77  | 2.52E-02 | 37.75  | 30.53 | 2.16E-01 |
| cg26197690 | -34.23 | 14.52 | 1.84E-02 | -49.14 | 45.17 | 2.77E-01 | 131.24  | 148.00 | 3.75E-01 | -30.50 | 16.20 | 5.97E-02 | -71.06 | 50.46 | 1.59E-01 |
| cg02199239 | 42.50  | 18.03 | 1.84E-02 | 29.23  | 48.49 | 5.47E-01 | -28.47  | 188.98 | 8.80E-01 | 34.19  | 20.70 | 9.86E-02 | 136.50 | 58.97 | 2.06E-02 |
| cg16625671 | -10.78 | 4.58  | 1.84E-02 | -22.00 | 12.43 | 7.68E-02 | 1.94    | 11.39  | 8.64E-01 | -11.29 | 5.86  | 5.41E-02 | -13.21 | 14.96 | 3.77E-01 |
| cg05592406 | -40.27 | 17.09 | 1.85E-02 | -29.31 | 24.72 | 2.36E-01 | -33.47  | 48.01  | 4.86E-01 | -51.21 | 39.57 | 1.96E-01 | -59.68 | 37.38 | 1.10E-01 |
| cg21002528 | 6.76   | 2.87  | 1.85E-02 | 6.29   | 3.69  | 8.86E-02 | 12.86   | 7.35   | 8.00E-02 | 7.98   | 8.64  | 3.56E-01 | 0.91   | 7.87  | 9.08E-01 |
| cg24008801 | -35.67 | 15.14 | 1.85E-02 | -44.83 | 18.32 | 1.44E-02 | -47.26  | 71.06  | 5.06E-01 | -36.30 | 57.96 | 5.31E-01 | -2.20  | 33.52 | 9.48E-01 |
| cg19513582 | 5.75   | 2.44  | 1.85E-02 | 4.04   | 3.40  | 2.34E-01 | 11.94   | 5.97   | 4.56E-02 | 7.42   | 5.56  | 1.82E-01 | 1.94   | 6.91  | 7.79E-01 |
| cg05986680 | -47.23 | 20.04 | 1.85E-02 | -43.33 | 35.27 | 2.19E-01 | -116.32 | 269.71 | 6.66E-01 | -57.28 | 25.88 | 2.69E-02 | 24.55  | 74.84 | 7.43E-01 |
| cg17314888 | 11.13  | 4.72  | 1.85E-02 | 5.69   | 6.37  | 3.71E-01 | 14.39   | 9.40   | 1.26E-01 | 27.46  | 10.89 | 1.17E-02 | 4.76   | 10.21 | 6.41E-01 |

|            |        |       |          |        |       |          |         |        |          |        |       |          |         |       |          |
|------------|--------|-------|----------|--------|-------|----------|---------|--------|----------|--------|-------|----------|---------|-------|----------|
| cg05758489 | 38.10  | 16.17 | 1.85E-02 | 49.11  | 19.09 | 1.01E-02 | -1.52   | 68.95  | 9.82E-01 | 29.36  | 69.89 | 6.74E-01 | 7.89    | 38.79 | 8.39E-01 |
| cg10510775 | 13.90  | 5.90  | 1.85E-02 | 18.22  | 8.16  | 2.55E-02 | 17.81   | 15.35  | 2.46E-01 | 17.94  | 17.67 | 3.10E-01 | -1.14   | 12.61 | 9.28E-01 |
| cg16717546 | -11.88 | 5.04  | 1.85E-02 | -9.66  | 10.30 | 3.48E-01 | -9.28   | 18.97  | 6.25E-01 | -10.04 | 6.53  | 1.24E-01 | -31.15  | 16.44 | 5.82E-02 |
| cg08261158 | 48.47  | 20.58 | 1.85E-02 | -7.29  | 56.73 | 8.98E-01 | -108.30 | 231.31 | 6.40E-01 | 58.45  | 23.38 | 1.24E-02 | 58.37   | 70.05 | 4.05E-01 |
| cg01067137 | 11.60  | 4.92  | 1.85E-02 | 12.60  | 6.73  | 6.12E-02 | 14.47   | 10.13  | 1.53E-01 | 21.63  | 17.74 | 2.23E-01 | -1.48   | 12.63 | 9.07E-01 |
| cg10536276 | 8.98   | 3.81  | 1.85E-02 | 10.01  | 5.09  | 4.91E-02 | 3.02    | 8.68   | 7.28E-01 | 14.53  | 12.51 | 2.46E-01 | 9.35    | 9.76  | 3.38E-01 |
| cg20411384 | -8.73  | 3.71  | 1.85E-02 | -16.46 | 7.36  | 2.54E-02 | 0.24    | 13.89  | 9.86E-01 | -6.00  | 5.11  | 2.41E-01 | -9.54   | 9.60  | 3.20E-01 |
| cg07083513 | 17.10  | 7.26  | 1.85E-02 | 14.27  | 10.43 | 1.71E-01 | 21.43   | 14.53  | 1.40E-01 | -21.37 | 27.71 | 4.41E-01 | 31.93   | 16.33 | 5.06E-02 |
| cg19120782 | 22.11  | 9.39  | 1.85E-02 | 25.24  | 16.84 | 1.34E-01 | 12.01   | 18.66  | 5.20E-01 | 29.53  | 17.47 | 9.10E-02 | 18.33   | 24.47 | 4.54E-01 |
| cg03229158 | 14.94  | 6.34  | 1.85E-02 | 22.23  | 9.71  | 2.20E-02 | 31.81   | 21.07  | 1.31E-01 | 12.05  | 12.31 | 3.28E-01 | -2.95   | 13.63 | 8.28E-01 |
| cg16393207 | 11.28  | 4.79  | 1.85E-02 | 15.24  | 7.76  | 4.97E-02 | 11.57   | 10.02  | 2.48E-01 | 12.83  | 10.14 | 2.06E-01 | -0.18   | 11.72 | 9.88E-01 |
| cg06591466 | 17.45  | 7.41  | 1.85E-02 | 31.60  | 15.78 | 4.52E-02 | 4.73    | 23.17  | 8.38E-01 | 24.54  | 13.45 | 6.80E-02 | 6.82    | 12.13 | 5.74E-01 |
| cg04136018 | 21.16  | 8.98  | 1.85E-02 | 21.16  | 20.64 | 3.05E-01 | -19.13  | 98.00  | 8.45E-01 | 25.67  | 10.52 | 1.47E-02 | -19.66  | 33.42 | 5.56E-01 |
| cg10627428 | 9.96   | 4.23  | 1.85E-02 | 10.56  | 4.72  | 2.52E-02 | 25.12   | 10.06  | 1.25E-02 | 7.37   | 9.32  | 4.29E-01 | 0.04    | 8.15  | 9.96E-01 |
| cg27619481 | 17.24  | 7.32  | 1.85E-02 | 34.88  | 19.34 | 7.14E-02 | 19.91   | 13.87  | 1.51E-01 | 8.13   | 10.22 | 4.26E-01 | 38.76   | 28.67 | 1.76E-01 |
| cg12909188 | -16.60 | 7.05  | 1.85E-02 | -31.40 | 11.43 | 6.01E-03 | -30.30  | 20.53  | 1.40E-01 | -6.46  | 5.62  | 2.50E-01 | -15.68  | 14.30 | 2.73E-01 |
| cg24098927 | 36.38  | 15.45 | 1.85E-02 | 36.98  | 21.54 | 8.59E-02 | 12.88   | 56.13  | 8.19E-01 | 113.52 | 58.17 | 5.10E-02 | 24.68   | 26.53 | 3.52E-01 |
| cg08849574 | 21.49  | 9.12  | 1.85E-02 | 33.34  | 13.74 | 1.52E-02 | 18.63   | 26.94  | 4.89E-01 | 25.39  | 29.47 | 3.89E-01 | 6.36    | 15.46 | 6.81E-01 |
| cg08572278 | -15.29 | 6.49  | 1.85E-02 | -21.09 | 12.06 | 8.03E-02 | -40.05  | 21.22  | 5.91E-02 | -6.64  | 5.45  | 2.24E-01 | -25.20  | 15.80 | 1.11E-01 |
| cg07303923 | 20.53  | 8.72  | 1.85E-02 | -2.20  | 24.52 | 9.29E-01 | 8.11    | 35.73  | 8.21E-01 | 25.54  | 10.05 | 1.10E-02 | 17.80   | 35.30 | 6.14E-01 |
| cg02276314 | 9.40   | 3.99  | 1.86E-02 | 11.14  | 5.44  | 4.04E-02 | 16.50   | 9.79   | 9.19E-02 | -3.96  | 10.33 | 7.02E-01 | 8.54    | 10.47 | 4.15E-01 |
| cg15628518 | 6.58   | 2.80  | 1.86E-02 | 6.61   | 3.53  | 6.13E-02 | 9.90    | 5.81   | 8.83E-02 | 4.78   | 11.98 | 6.90E-01 | -1.34   | 9.51  | 8.88E-01 |
| cg25436766 | -12.76 | 5.42  | 1.86E-02 | -14.86 | 6.75  | 2.78E-02 | -23.63  | 15.10  | 1.18E-01 | 5.81   | 20.69 | 7.79E-01 | -3.44   | 13.62 | 8.00E-01 |
| cg10024478 | 19.56  | 8.31  | 1.86E-02 | -1.71  | 15.50 | 9.12E-01 | 36.87   | 17.19  | 3.20E-02 | 21.75  | 15.79 | 1.68E-01 | 26.12   | 17.73 | 1.41E-01 |
| cg14514987 | -15.19 | 6.45  | 1.86E-02 | -31.80 | 15.71 | 4.29E-02 | -16.42  | 30.32  | 5.88E-01 | -13.76 | 7.82  | 7.84E-02 | 2.72    | 19.86 | 8.91E-01 |
| cg18345406 | -12.86 | 5.46  | 1.86E-02 | -17.06 | 9.22  | 6.42E-02 | -12.67  | 19.45  | 5.15E-01 | -4.95  | 5.88  | 4.00E-01 | -29.77  | 12.46 | 1.69E-02 |
| cg24360651 | 35.30  | 14.99 | 1.86E-02 | 26.25  | 24.04 | 2.75E-01 | 88.29   | 48.00  | 6.59E-02 | 31.24  | 31.74 | 3.25E-01 | 32.74   | 27.84 | 2.40E-01 |
| cg10490227 | -17.56 | 7.46  | 1.86E-02 | -5.77  | 13.03 | 6.58E-01 | -18.78  | 23.42  | 4.23E-01 | -28.15 | 13.85 | 4.22E-02 | -19.96  | 14.08 | 1.56E-01 |
| cg10933959 | 5.96   | 2.53  | 1.86E-02 | 4.73   | 3.98  | 2.34E-01 | 11.40   | 6.13   | 6.28E-02 | 7.29   | 4.49  | 1.05E-01 | -1.97   | 7.71  | 7.98E-01 |
| cg19214024 | 12.40  | 5.27  | 1.86E-02 | 7.15   | 7.14  | 3.16E-01 | 13.10   | 9.32   | 1.60E-01 | -2.79  | 18.22 | 8.78E-01 | 28.48   | 11.05 | 9.92E-03 |
| cg08051602 | 17.28  | 7.34  | 1.86E-02 | 4.73   | 16.02 | 7.68E-01 | -6.24   | 56.68  | 9.12E-01 | 17.79  | 8.90  | 4.56E-02 | 46.39   | 24.16 | 5.48E-02 |
| cg22481632 | 25.24  | 10.72 | 1.86E-02 | 47.67  | 22.19 | 3.17E-02 | 23.85   | 39.78  | 5.49E-01 | 25.97  | 15.96 | 1.04E-01 | 2.67    | 21.79 | 9.02E-01 |
| cg13715758 | -61.40 | 26.08 | 1.86E-02 | -54.91 | 32.46 | 9.07E-02 | 20.96   | 109.48 | 8.48E-01 | -26.84 | 89.00 | 7.63E-01 | -117.31 | 56.70 | 3.85E-02 |
| cg01255591 | 19.38  | 8.23  | 1.86E-02 | 2.47   | 10.07 | 8.06E-01 | 22.87   | 13.24  | 8.40E-02 | 39.71  | 14.13 | 4.96E-03 | 20.29   | 14.96 | 1.75E-01 |
| cg03427299 | 14.06  | 5.97  | 1.86E-02 | 25.41  | 11.05 | 2.15E-02 | 3.82    | 17.38  | 8.26E-01 | 8.49   | 11.06 | 4.42E-01 | 12.44   | 10.94 | 2.56E-01 |

|            |        |       |          |        |       |          |        |        |          |        |       |          |        |       |          |
|------------|--------|-------|----------|--------|-------|----------|--------|--------|----------|--------|-------|----------|--------|-------|----------|
| cg05667097 | 11.24  | 4.77  | 1.86E-02 | 12.16  | 6.94  | 7.98E-02 | 20.19  | 14.00  | 1.49E-01 | 10.76  | 9.71  | 2.68E-01 | 3.19   | 11.61 | 7.84E-01 |
| cg13607230 | 7.21   | 3.06  | 1.86E-02 | 8.34   | 4.56  | 6.76E-02 | 5.44   | 7.85   | 4.88E-01 | 10.39  | 6.25  | 9.66E-02 | 0.83   | 7.73  | 9.15E-01 |
| cg16126900 | -11.97 | 5.09  | 1.86E-02 | -13.85 | 10.78 | 1.99E-01 | -9.97  | 17.30  | 5.64E-01 | -13.50 | 6.65  | 4.22E-02 | -1.12  | 15.71 | 9.43E-01 |
| cg11580026 | -7.04  | 2.99  | 1.86E-02 | -5.28  | 4.88  | 2.79E-01 | -8.63  | 6.79   | 2.04E-01 | -12.95 | 6.38  | 4.22E-02 | -2.52  | 6.52  | 6.99E-01 |
| cg16625218 | -9.87  | 4.19  | 1.86E-02 | -12.66 | 5.98  | 3.43E-02 | -2.15  | 9.88   | 8.28E-01 | -6.02  | 14.67 | 6.82E-01 | -11.24 | 8.45  | 1.84E-01 |
| cg21460503 | -24.75 | 10.52 | 1.86E-02 | -48.54 | 25.25 | 5.45E-02 | 34.43  | 84.58  | 6.84E-01 | -19.25 | 12.31 | 1.18E-01 | -34.73 | 37.04 | 3.48E-01 |
| cg24404878 | -28.87 | 12.27 | 1.86E-02 | -49.11 | 22.92 | 3.21E-02 | -31.16 | 66.90  | 6.41E-01 | -24.40 | 17.89 | 1.73E-01 | -10.89 | 26.80 | 6.85E-01 |
| cg16234986 | -12.44 | 5.29  | 1.86E-02 | -21.08 | 13.32 | 1.14E-01 | -6.68  | 16.91  | 6.93E-01 | -10.87 | 6.40  | 8.94E-02 | -16.82 | 21.15 | 4.26E-01 |
| cg16535667 | 9.35   | 3.97  | 1.86E-02 | 11.65  | 7.33  | 1.12E-01 | 11.55  | 9.49   | 2.24E-01 | 8.53   | 6.37  | 1.81E-01 | 4.14   | 10.50 | 6.93E-01 |
| cg25005739 | 13.06  | 5.55  | 1.86E-02 | 15.48  | 7.40  | 3.65E-02 | 16.22  | 16.53  | 3.26E-01 | 8.78   | 15.61 | 5.74E-01 | 7.14   | 12.45 | 5.67E-01 |
| cg20996561 | 6.80   | 2.89  | 1.86E-02 | 4.44   | 3.95  | 2.61E-01 | 10.53  | 6.38   | 9.87E-02 | 12.51  | 10.60 | 2.38E-01 | 7.22   | 6.74  | 2.84E-01 |
| cg06916709 | -21.61 | 9.18  | 1.86E-02 | -21.28 | 12.13 | 7.95E-02 | -29.62 | 42.90  | 4.90E-01 | -39.26 | 23.78 | 9.88E-02 | -9.53  | 19.05 | 6.17E-01 |
| cg16814808 | 18.66  | 7.93  | 1.86E-02 | 44.06  | 19.66 | 2.50E-02 | 13.81  | 47.27  | 7.70E-01 | 12.36  | 9.97  | 2.15E-01 | 18.55  | 18.82 | 3.24E-01 |
| cg18935231 | -17.26 | 7.34  | 1.86E-02 | -21.93 | 13.33 | 9.99E-02 | -11.11 | 15.07  | 4.61E-01 | -17.92 | 15.05 | 2.34E-01 | -16.75 | 15.55 | 2.81E-01 |
| cg21491107 | 8.43   | 3.58  | 1.86E-02 | 8.53   | 4.89  | 8.12E-02 | 12.77  | 8.67   | 1.41E-01 | 11.21  | 8.90  | 2.08E-01 | -1.07  | 9.87  | 9.14E-01 |
| cg24826252 | -13.08 | 5.56  | 1.86E-02 | -8.43  | 12.85 | 5.12E-01 | -3.33  | 26.65  | 9.01E-01 | -13.52 | 6.61  | 4.06E-02 | -29.07 | 22.45 | 1.95E-01 |
| cg26965151 | 44.86  | 19.06 | 1.86E-02 | 46.73  | 24.98 | 6.14E-02 | 29.20  | 76.73  | 7.04E-01 | 21.38  | 12.21 | 8.00E-02 | 112.32 | 38.86 | 3.85E-03 |
| cg12151545 | 14.17  | 6.02  | 1.86E-02 | 15.40  | 8.23  | 6.11E-02 | 11.93  | 13.67  | 3.83E-01 | 11.35  | 18.01 | 5.29E-01 | 14.75  | 15.15 | 3.30E-01 |
| cg27009208 | 36.95  | 15.70 | 1.86E-02 | 32.69  | 48.90 | 5.04E-01 | 42.68  | 46.02  | 3.54E-01 | 36.38  | 18.57 | 5.01E-02 | 39.70  | 61.53 | 5.19E-01 |
| cg20673721 | 7.51   | 3.19  | 1.86E-02 | 7.28   | 3.64  | 4.57E-02 | 14.45  | 6.45   | 2.51E-02 | 11.56  | 8.94  | 1.96E-01 | -3.30  | 7.33  | 6.52E-01 |
| cg13798679 | -9.29  | 3.95  | 1.86E-02 | -3.51  | 4.93  | 4.77E-01 | -17.85 | 9.45   | 5.91E-02 | -7.30  | 11.01 | 5.07E-01 | -17.97 | 8.32  | 3.08E-02 |
| cg04963535 | 33.94  | 14.42 | 1.86E-02 | 46.50  | 43.44 | 2.84E-01 | 88.58  | 167.90 | 5.98E-01 | 29.95  | 15.95 | 6.04E-02 | 56.78  | 56.81 | 3.18E-01 |
| cg21461196 | -31.03 | 13.19 | 1.86E-02 | -27.22 | 15.19 | 7.31E-02 | -24.25 | 50.17  | 6.29E-01 | -37.87 | 47.60 | 4.26E-01 | -59.06 | 41.63 | 1.56E-01 |
| cg26850677 | -20.29 | 8.62  | 1.86E-02 | -13.50 | 16.51 | 4.14E-01 | -48.23 | 34.07  | 1.57E-01 | -28.01 | 11.90 | 1.86E-02 | 8.64   | 23.20 | 7.10E-01 |
| cg02053092 | 18.74  | 7.97  | 1.86E-02 | 36.74  | 17.83 | 3.94E-02 | 2.23   | 41.20  | 9.57E-01 | 15.20  | 9.92  | 1.26E-01 | 12.91  | 23.17 | 5.77E-01 |
| cg03227456 | -58.79 | 24.99 | 1.86E-02 | -59.07 | 31.97 | 6.46E-02 | -25.59 | 110.82 | 8.17E-01 | -30.50 | 78.52 | 6.98E-01 | -77.32 | 51.38 | 1.32E-01 |
| cg06472439 | 17.92  | 7.62  | 1.87E-02 | 12.48  | 10.53 | 2.36E-01 | 5.29   | 21.28  | 8.04E-01 | 43.46  | 32.53 | 1.82E-01 | 28.33  | 14.04 | 4.37E-02 |
| cg01120307 | 19.60  | 8.33  | 1.87E-02 | 34.85  | 21.38 | 1.03E-01 | 33.59  | 22.63  | 1.38E-01 | 14.80  | 10.49 | 1.58E-01 | 5.07   | 29.19 | 8.62E-01 |
| cg00514895 | 20.47  | 8.70  | 1.87E-02 | 16.83  | 24.72 | 4.96E-01 | 14.60  | 38.22  | 7.02E-01 | 24.01  | 10.44 | 2.15E-02 | 7.28   | 24.21 | 7.64E-01 |
| cg08336300 | 9.89   | 4.20  | 1.87E-02 | 16.69  | 5.32  | 1.70E-03 | 9.00   | 10.54  | 3.93E-01 | -2.44  | 11.82 | 8.37E-01 | 3.52   | 7.73  | 6.49E-01 |
| cg19262968 | 32.15  | 13.67 | 1.87E-02 | 36.10  | 23.08 | 1.18E-01 | -7.81  | 118.42 | 9.47E-01 | 31.26  | 18.66 | 9.39E-02 | 28.38  | 43.36 | 5.13E-01 |
| cg03293206 | -9.35  | 3.98  | 1.87E-02 | -4.97  | 5.21  | 3.40E-01 | -8.79  | 8.91   | 3.24E-01 | -19.39 | 17.33 | 2.63E-01 | -22.22 | 9.76  | 2.29E-02 |
| cg04513185 | -26.38 | 11.22 | 1.87E-02 | -16.93 | 18.27 | 3.54E-01 | -29.47 | 32.94  | 3.71E-01 | -44.45 | 21.69 | 4.04E-02 | -19.57 | 22.92 | 3.93E-01 |
| cg18108753 | -12.22 | 5.20  | 1.87E-02 | -19.54 | 6.71  | 3.59E-03 | 2.80   | 10.35  | 7.87E-01 | -19.44 | 11.51 | 9.12E-02 | -7.99  | 9.46  | 3.98E-01 |
| cg02666265 | 25.36  | 10.78 | 1.87E-02 | 19.31  | 20.41 | 3.44E-01 | 47.57  | 21.21  | 2.49E-02 | 7.94   | 20.15 | 6.93E-01 | 30.73  | 25.73 | 2.32E-01 |

|            |        |       |          |        |       |          |         |        |          |        |       |          |        |       |          |
|------------|--------|-------|----------|--------|-------|----------|---------|--------|----------|--------|-------|----------|--------|-------|----------|
| cg10554801 | -30.32 | 12.89 | 1.87E-02 | -43.58 | 21.98 | 4.73E-02 | -16.77  | 43.33  | 6.99E-01 | -22.83 | 23.33 | 3.28E-01 | -26.19 | 25.19 | 2.98E-01 |
| cg04349506 | 23.82  | 10.13 | 1.87E-02 | 41.48  | 20.58 | 4.38E-02 | 13.02   | 34.81  | 7.08E-01 | 12.53  | 13.85 | 3.66E-01 | 43.10  | 27.22 | 1.13E-01 |
| cg22729726 | 10.83  | 4.60  | 1.87E-02 | 14.54  | 6.89  | 3.50E-02 | 10.34   | 11.04  | 3.49E-01 | 17.42  | 11.52 | 1.30E-01 | -1.09  | 9.81  | 9.12E-01 |
| cg11239019 | -34.04 | 14.48 | 1.87E-02 | 13.73  | 42.26 | 7.45E-01 | 3.80    | 164.36 | 9.82E-01 | -43.07 | 16.11 | 7.50E-03 | -13.31 | 55.81 | 8.11E-01 |
| cg19377421 | -14.49 | 6.16  | 1.87E-02 | -25.48 | 10.97 | 2.02E-02 | 1.13    | 13.45  | 9.33E-01 | -10.68 | 13.23 | 4.20E-01 | -16.95 | 12.13 | 1.62E-01 |
| cg10947001 | -13.20 | 5.62  | 1.87E-02 | -20.82 | 13.60 | 1.26E-01 | -2.66   | 26.52  | 9.20E-01 | -10.85 | 6.84  | 1.13E-01 | -20.09 | 16.87 | 2.34E-01 |
| cg08273957 | 11.69  | 4.97  | 1.87E-02 | 15.11  | 7.37  | 4.04E-02 | 9.63    | 14.52  | 5.07E-01 | 20.56  | 12.35 | 9.59E-02 | 1.33   | 9.65  | 8.90E-01 |
| cg18518722 | 18.81  | 8.00  | 1.87E-02 | 5.12   | 15.40 | 7.39E-01 | 30.86   | 13.22  | 1.95E-02 | 16.72  | 18.43 | 3.64E-01 | 16.92  | 19.09 | 3.76E-01 |
| cg00634714 | 12.23  | 5.20  | 1.87E-02 | 9.22   | 6.49  | 1.55E-01 | 22.36   | 13.88  | 1.07E-01 | 16.45  | 25.71 | 5.22E-01 | 14.15  | 12.42 | 2.54E-01 |
| cg14353506 | -10.92 | 4.65  | 1.87E-02 | -14.20 | 13.13 | 2.79E-01 | -4.89   | 17.79  | 7.83E-01 | -9.76  | 5.43  | 7.23E-02 | -22.24 | 16.95 | 1.90E-01 |
| cg16489809 | 5.47   | 2.33  | 1.87E-02 | 5.72   | 3.57  | 1.10E-01 | 10.14   | 5.44   | 6.20E-02 | 4.00   | 4.28  | 3.50E-01 | 0.05   | 7.46  | 9.94E-01 |
| cg13682912 | -12.04 | 5.12  | 1.87E-02 | -19.91 | 11.85 | 9.29E-02 | -11.82  | 15.38  | 4.42E-01 | -9.75  | 6.62  | 1.41E-01 | -11.35 | 15.96 | 4.77E-01 |
| cg13178361 | 5.89   | 2.51  | 1.87E-02 | 5.14   | 3.23  | 1.12E-01 | 15.26   | 7.75   | 4.91E-02 | 5.56   | 6.56  | 3.97E-01 | 2.69   | 6.47  | 6.78E-01 |
| cg04424379 | -37.05 | 15.76 | 1.87E-02 | -39.59 | 49.03 | 4.19E-01 | -84.21  | 235.59 | 7.21E-01 | -32.81 | 17.46 | 6.02E-02 | -75.70 | 56.74 | 1.82E-01 |
| cg04421348 | -13.08 | 5.57  | 1.87E-02 | -17.40 | 7.74  | 2.46E-02 | -4.03   | 14.26  | 7.78E-01 | -9.07  | 13.36 | 4.97E-01 | -12.11 | 14.04 | 3.88E-01 |
| cg17167924 | 37.27  | 15.85 | 1.87E-02 | -5.37  | 36.68 | 8.84E-01 | -18.17  | 100.94 | 8.57E-01 | 45.21  | 19.22 | 1.87E-02 | 73.53  | 48.16 | 1.27E-01 |
| cg11408933 | 16.67  | 7.09  | 1.87E-02 | 19.07  | 17.02 | 2.63E-01 | 12.16   | 17.43  | 4.85E-01 | 14.30  | 10.98 | 1.93E-01 | 22.09  | 14.37 | 1.24E-01 |
| cg06041067 | 17.99  | 7.65  | 1.87E-02 | 13.84  | 9.93  | 1.64E-01 | 30.60   | 25.14  | 2.24E-01 | 34.52  | 31.81 | 2.78E-01 | 19.31  | 15.12 | 2.02E-01 |
| cg02148270 | 15.16  | 6.45  | 1.87E-02 | 22.23  | 15.57 | 1.53E-01 | 9.68    | 20.53  | 6.37E-01 | 15.51  | 7.89  | 4.95E-02 | 0.74   | 25.70 | 9.77E-01 |
| cg23409370 | -30.22 | 12.86 | 1.87E-02 | -33.85 | 15.31 | 2.70E-02 | -58.46  | 77.96  | 4.53E-01 | -56.64 | 74.63 | 4.48E-01 | -12.92 | 26.37 | 6.24E-01 |
| cg03531396 | 14.95  | 6.36  | 1.87E-02 | 6.46   | 20.62 | 7.54E-01 | 65.35   | 56.29  | 2.46E-01 | 15.57  | 7.07  | 2.77E-02 | 10.87  | 22.03 | 6.22E-01 |
| cg16661744 | 15.68  | 6.67  | 1.88E-02 | 14.94  | 8.98  | 9.62E-02 | 14.96   | 17.03  | 3.80E-01 | 12.29  | 25.42 | 6.29E-01 | 19.00  | 14.03 | 1.76E-01 |
| cg11521079 | -7.42  | 3.16  | 1.88E-02 | -9.39  | 4.28  | 2.83E-02 | -7.04   | 7.48   | 3.47E-01 | -8.51  | 10.71 | 4.27E-01 | -1.70  | 7.20  | 8.14E-01 |
| cg04124987 | 33.24  | 14.14 | 1.88E-02 | 28.61  | 17.00 | 9.24E-02 | -38.42  | 65.64  | 5.58E-01 | 73.18  | 74.25 | 3.24E-01 | 55.83  | 29.81 | 6.11E-02 |
| cg26960370 | 22.47  | 9.56  | 1.88E-02 | 23.11  | 16.83 | 1.70E-01 | 24.94   | 17.29  | 1.49E-01 | 17.81  | 21.05 | 3.98E-01 | 22.48  | 23.52 | 3.39E-01 |
| cg27656486 | -47.06 | 20.02 | 1.88E-02 | -51.90 | 56.08 | 3.55E-01 | -183.66 | 178.45 | 3.03E-01 | -48.99 | 22.97 | 3.29E-02 | -8.98  | 63.33 | 8.87E-01 |
| cg04310833 | 18.67  | 7.94  | 1.88E-02 | 7.87   | 18.82 | 6.76E-01 | 35.17   | 32.60  | 2.81E-01 | 18.09  | 9.56  | 5.84E-02 | 37.54  | 29.71 | 2.06E-01 |
| cg11592677 | 22.30  | 9.49  | 1.88E-02 | 26.20  | 15.64 | 9.39E-02 | 23.14   | 18.16  | 2.03E-01 | 12.81  | 20.10 | 5.24E-01 | 25.60  | 25.72 | 3.19E-01 |
| cg24650394 | 26.40  | 11.23 | 1.88E-02 | 6.37   | 19.89 | 7.49E-01 | -35.66  | 53.65  | 5.06E-01 | 37.43  | 12.83 | 3.54E-03 | 42.35  | 30.21 | 1.61E-01 |
| cg20593611 | 17.63  | 7.50  | 1.88E-02 | 28.79  | 24.80 | 2.46E-01 | 10.87   | 37.85  | 7.74E-01 | 22.75  | 8.95  | 1.10E-02 | -8.54  | 18.39 | 6.42E-01 |
| cg12059507 | 25.29  | 10.76 | 1.88E-02 | 25.58  | 18.92 | 1.76E-01 | -54.60  | 61.73  | 3.76E-01 | 24.90  | 15.35 | 1.05E-01 | 41.73  | 27.43 | 1.28E-01 |
| cg19413417 | 22.16  | 9.43  | 1.88E-02 | 20.74  | 14.10 | 1.41E-01 | 40.06   | 24.57  | 1.03E-01 | 14.71  | 28.03 | 6.00E-01 | 18.20  | 17.44 | 2.97E-01 |
| cg02856338 | 13.97  | 5.94  | 1.88E-02 | 18.75  | 18.12 | 3.01E-01 | -49.23  | 61.95  | 4.27E-01 | 11.09  | 7.27  | 1.27E-01 | 23.22  | 12.82 | 7.02E-02 |
| cg13433729 | -8.83  | 3.76  | 1.88E-02 | -13.56 | 6.64  | 4.11E-02 | -7.58   | 9.28   | 4.14E-01 | -5.21  | 6.03  | 3.87E-01 | -9.59  | 10.54 | 3.63E-01 |
| cg13442333 | 21.32  | 9.07  | 1.88E-02 | 27.42  | 18.49 | 1.38E-01 | 16.96   | 21.20  | 4.24E-01 | 11.57  | 13.45 | 3.90E-01 | 52.37  | 26.06 | 4.44E-02 |

|            |        |       |          |        |       |          |        |        |          |        |        |          |        |       |          |
|------------|--------|-------|----------|--------|-------|----------|--------|--------|----------|--------|--------|----------|--------|-------|----------|
| cg10296205 | 7.09   | 3.02  | 1.88E-02 | 5.70   | 3.99  | 1.52E-01 | 5.40   | 8.01   | 5.00E-01 | 6.64   | 9.25   | 4.73E-01 | 13.15  | 7.14  | 6.54E-02 |
| cg10558494 | 22.43  | 9.55  | 1.88E-02 | 19.07  | 14.23 | 1.80E-01 | 19.31  | 28.72  | 5.01E-01 | 26.69  | 31.38  | 3.95E-01 | 26.65  | 16.20 | 1.00E-01 |
| cg25116216 | 25.67  | 10.92 | 1.88E-02 | 11.07  | 39.29 | 7.78E-01 | 29.78  | 158.08 | 8.51E-01 | 26.10  | 11.79  | 2.68E-02 | 38.20  | 44.94 | 3.95E-01 |
| cg12351749 | 21.76  | 9.26  | 1.88E-02 | 18.95  | 16.54 | 2.52E-01 | 9.83   | 16.94  | 5.62E-01 | 23.16  | 17.85  | 1.94E-01 | 56.18  | 26.93 | 3.70E-02 |
| cg15612063 | 44.01  | 18.73 | 1.88E-02 | 35.70  | 25.45 | 1.61E-01 | 38.03  | 106.86 | 7.22E-01 | 79.21  | 74.74  | 2.89E-01 | 50.80  | 31.02 | 1.01E-01 |
| cg26342533 | -19.14 | 8.15  | 1.88E-02 | -21.59 | 22.54 | 3.38E-01 | 1.25   | 33.43  | 9.70E-01 | -20.24 | 9.51   | 3.33E-02 | -20.23 | 29.45 | 4.92E-01 |
| cg11855409 | -11.36 | 4.84  | 1.88E-02 | -16.01 | 9.21  | 8.22E-02 | -14.15 | 12.48  | 2.57E-01 | -5.25  | 7.39   | 4.77E-01 | -17.69 | 12.68 | 1.63E-01 |
| cg10792660 | -12.14 | 5.17  | 1.88E-02 | -16.11 | 11.12 | 1.47E-01 | 1.58   | 12.46  | 8.99E-01 | -13.91 | 7.20   | 5.34E-02 | -18.23 | 16.61 | 2.72E-01 |
| cg02569129 | 19.65  | 8.36  | 1.88E-02 | 19.57  | 12.75 | 1.25E-01 | 6.14   | 21.58  | 7.76E-01 | 42.78  | 22.03  | 5.22E-02 | 15.03  | 15.95 | 3.46E-01 |
| cg25386426 | 13.64  | 5.81  | 1.88E-02 | 18.83  | 14.83 | 2.04E-01 | 4.60   | 15.76  | 7.70E-01 | 12.44  | 7.32   | 8.94E-02 | 27.95  | 20.19 | 1.66E-01 |
| cg12802921 | 27.66  | 11.77 | 1.88E-02 | 34.50  | 35.63 | 3.33E-01 | 7.00   | 177.27 | 9.68E-01 | 30.88  | 13.09  | 1.83E-02 | -14.44 | 42.27 | 7.33E-01 |
| cg18754335 | 16.85  | 7.17  | 1.88E-02 | 20.06  | 12.43 | 1.06E-01 | 23.13  | 20.28  | 2.54E-01 | 15.11  | 10.52  | 1.51E-01 | 3.30   | 25.82 | 8.98E-01 |
| cg22146642 | 14.77  | 6.29  | 1.88E-02 | 21.01  | 12.60 | 9.55E-02 | 2.92   | 16.08  | 8.56E-01 | 13.96  | 9.01   | 1.21E-01 | 20.64  | 18.87 | 2.74E-01 |
| cg12499749 | 21.52  | 9.16  | 1.88E-02 | -1.87  | 29.46 | 9.49E-01 | -66.92 | 137.09 | 6.25E-01 | 24.19  | 9.91   | 1.46E-02 | 30.07  | 43.83 | 4.93E-01 |
| cg03594801 | 9.15   | 3.89  | 1.88E-02 | 7.50   | 6.00  | 2.11E-01 | 12.95  | 7.97   | 1.04E-01 | -0.96  | 8.43   | 9.09E-01 | 20.10  | 9.32  | 3.11E-02 |
| cg15092231 | 18.41  | 7.84  | 1.88E-02 | 17.69  | 12.39 | 1.53E-01 | 14.47  | 14.13  | 3.06E-01 | 13.99  | 22.00  | 5.25E-01 | 30.80  | 19.25 | 1.10E-01 |
| cg10459187 | -15.40 | 6.56  | 1.88E-02 | -17.18 | 9.17  | 6.11E-02 | -10.05 | 15.12  | 5.06E-01 | 1.01   | 19.65  | 9.59E-01 | -25.53 | 15.04 | 8.96E-02 |
| cg11052958 | 29.98  | 12.76 | 1.88E-02 | 13.60  | 11.95 | 2.55E-01 | 26.55  | 20.93  | 2.05E-01 | 13.07  | 42.34  | 7.58E-01 | 61.80  | 18.19 | 6.79E-04 |
| cg02371464 | 18.88  | 8.04  | 1.88E-02 | 32.68  | 12.80 | 1.07E-02 | 40.19  | 26.34  | 1.27E-01 | 15.45  | 11.97  | 1.97E-01 | 0.37   | 14.00 | 9.79E-01 |
| cg00917156 | 15.86  | 6.75  | 1.88E-02 | 17.74  | 8.17  | 2.98E-02 | 30.54  | 9.84   | 1.90E-03 | -6.20  | 13.23  | 6.39E-01 | 13.68  | 11.33 | 2.27E-01 |
| cg16661143 | 20.09  | 8.55  | 1.88E-02 | 17.62  | 14.39 | 2.21E-01 | 34.14  | 17.28  | 4.82E-02 | 7.99   | 16.46  | 6.27E-01 | 25.32  | 23.51 | 2.82E-01 |
| cg26720452 | 19.86  | 8.46  | 1.88E-02 | 16.69  | 11.63 | 1.51E-01 | 17.90  | 19.10  | 3.49E-01 | 45.95  | 32.80  | 1.61E-01 | 21.43  | 18.50 | 2.47E-01 |
| cg05888433 | -9.30  | 3.96  | 1.88E-02 | -0.19  | 8.50  | 9.82E-01 | -3.35  | 23.54  | 8.87E-01 | -13.06 | 4.94   | 8.14E-03 | -6.82  | 11.87 | 5.66E-01 |
| cg05002837 | -15.83 | 6.74  | 1.88E-02 | -37.31 | 18.52 | 4.39E-02 | -11.95 | 24.10  | 6.20E-01 | -13.01 | 8.03   | 1.05E-01 | -9.25  | 23.16 | 6.90E-01 |
| cg07618900 | -8.62  | 3.67  | 1.88E-02 | -11.07 | 6.97  | 1.13E-01 | -11.59 | 12.45  | 3.52E-01 | -5.39  | 5.22   | 3.02E-01 | -13.24 | 9.73  | 1.74E-01 |
| cg18754857 | -8.24  | 3.51  | 1.88E-02 | -10.48 | 6.95  | 1.32E-01 | 4.55   | 10.15  | 6.54E-01 | -12.59 | 5.18   | 1.51E-02 | -2.06  | 8.58  | 8.10E-01 |
| cg25961579 | -55.53 | 23.64 | 1.88E-02 | -40.06 | 31.41 | 2.02E-01 | 45.93  | 104.94 | 6.62E-01 | -69.91 | 74.96  | 3.51E-01 | -99.59 | 44.43 | 2.50E-02 |
| cg25096566 | 14.92  | 6.35  | 1.88E-02 | 4.57   | 19.80 | 8.17E-01 | 22.27  | 28.66  | 4.37E-01 | 18.44  | 7.80   | 1.80E-02 | 6.05   | 14.83 | 6.83E-01 |
| cg10999000 | -12.40 | 5.28  | 1.88E-02 | -17.69 | 14.62 | 2.26E-01 | -17.59 | 36.01  | 6.25E-01 | -11.44 | 6.07   | 5.94E-02 | -11.54 | 17.43 | 5.08E-01 |
| cg20289911 | -15.14 | 6.45  | 1.88E-02 | -14.51 | 9.04  | 1.08E-01 | -17.62 | 14.98  | 2.40E-01 | -9.56  | 19.54  | 6.25E-01 | -17.51 | 14.51 | 2.27E-01 |
| cg20817941 | 12.30  | 5.24  | 1.88E-02 | 19.07  | 8.27  | 2.12E-02 | 12.94  | 10.52  | 2.18E-01 | 5.14   | 16.74  | 7.59E-01 | 3.73   | 10.39 | 7.19E-01 |
| cg24411314 | -16.46 | 7.01  | 1.88E-02 | 0.97   | 17.23 | 9.55E-01 | -47.07 | 50.82  | 3.54E-01 | -21.49 | 8.12   | 8.12E-03 | 4.24   | 26.49 | 8.73E-01 |
| cg03770703 | -9.09  | 3.87  | 1.89E-02 | -0.14  | 9.64  | 9.89E-01 | -17.03 | 16.53  | 3.03E-01 | -9.87  | 4.65   | 3.38E-02 | -14.13 | 12.77 | 2.69E-01 |
| cg08354053 | -13.17 | 5.61  | 1.89E-02 | -19.35 | 8.50  | 2.28E-02 | 4.01   | 12.13  | 7.41E-01 | -16.87 | 16.15  | 2.96E-01 | -15.47 | 11.67 | 1.85E-01 |
| cg07215511 | 103.69 | 44.15 | 1.89E-02 | 143.09 | 65.65 | 2.93E-02 | 246.94 | 232.52 | 2.88E-01 | 169.61 | 116.38 | 1.45E-01 | 15.34  | 72.82 | 8.33E-01 |

|              |        |       |          |        |       |          |         |        |          |        |       |          |        |       |          |
|--------------|--------|-------|----------|--------|-------|----------|---------|--------|----------|--------|-------|----------|--------|-------|----------|
| cg07473985   | -23.80 | 10.13 | 1.89E-02 | -32.62 | 15.61 | 3.67E-02 | 1.94    | 20.17  | 9.23E-01 | -15.31 | 16.21 | 3.45E-01 | -50.61 | 21.27 | 1.73E-02 |
| ch.7.313144R | 34.46  | 14.67 | 1.89E-02 | 46.44  | 19.78 | 1.89E-02 | -20.11  | 64.91  | 7.57E-01 | 57.18  | 76.83 | 4.57E-01 | 21.65  | 24.39 | 3.75E-01 |
| cg01206472   | -39.60 | 16.86 | 1.89E-02 | -25.10 | 22.01 | 2.54E-01 | -100.00 | 67.94  | 1.41E-01 | 2.91   | 58.63 | 9.60E-01 | -70.54 | 32.55 | 3.02E-02 |
| cg08073142   | 40.10  | 17.08 | 1.89E-02 | 22.78  | 56.99 | 6.89E-01 | -144.28 | 199.19 | 4.69E-01 | 41.19  | 18.71 | 2.77E-02 | 68.81  | 64.61 | 2.87E-01 |
| cg17102069   | -32.40 | 13.80 | 1.89E-02 | -66.81 | 45.89 | 1.45E-01 | -7.39   | 184.78 | 9.68E-01 | -26.17 | 15.05 | 8.21E-02 | -67.97 | 54.71 | 2.14E-01 |
| cg04919425   | -15.55 | 6.62  | 1.89E-02 | -19.30 | 13.90 | 1.65E-01 | -10.73  | 25.00  | 6.68E-01 | -17.75 | 8.47  | 3.61E-02 | 4.68   | 21.83 | 8.30E-01 |
| cg02358112   | -30.55 | 13.01 | 1.89E-02 | -3.57  | 39.88 | 9.29E-01 | 22.25   | 155.07 | 8.86E-01 | -39.49 | 14.35 | 5.93E-03 | 33.02  | 51.16 | 5.19E-01 |
| cg26514961   | 5.72   | 2.44  | 1.89E-02 | 3.92   | 3.53  | 2.68E-01 | 9.77    | 5.64   | 8.35E-02 | 7.55   | 4.91  | 1.25E-01 | 1.95   | 8.10  | 8.09E-01 |
| cg05768427   | 9.67   | 4.12  | 1.89E-02 | 23.62  | 9.41  | 1.21E-02 | 6.30    | 10.17  | 5.36E-01 | 8.52   | 7.18  | 2.36E-01 | 4.15   | 7.32  | 5.71E-01 |
| cg04760574   | 25.55  | 10.88 | 1.89E-02 | 20.38  | 11.68 | 8.11E-02 | 58.35   | 76.52  | 4.46E-01 | 89.95  | 40.13 | 2.50E-02 | 16.07  | 27.66 | 5.61E-01 |
| cg23138119   | -13.48 | 5.74  | 1.89E-02 | -4.46  | 9.71  | 6.46E-01 | -13.93  | 13.71  | 3.10E-01 | -23.38 | 9.30  | 1.19E-02 | -5.97  | 18.82 | 7.51E-01 |
| cg00259388   | -11.89 | 5.06  | 1.89E-02 | -24.05 | 12.98 | 6.39E-02 | -18.44  | 20.96  | 3.79E-01 | -9.32  | 6.12  | 1.28E-01 | -7.35  | 15.61 | 6.38E-01 |
| cg04951476   | -9.79  | 4.17  | 1.89E-02 | -15.17 | 9.10  | 9.54E-02 | -11.89  | 14.22  | 4.03E-01 | -7.03  | 5.62  | 2.11E-01 | -11.08 | 10.61 | 2.96E-01 |
| cg03671123   | 21.95  | 9.35  | 1.89E-02 | 16.22  | 22.76 | 4.76E-01 | 90.84   | 48.52  | 6.12E-02 | 20.51  | 11.29 | 6.93E-02 | 16.35  | 28.37 | 5.64E-01 |
| cg15924831   | 22.76  | 9.69  | 1.89E-02 | 15.39  | 15.96 | 3.35E-01 | 19.62   | 18.58  | 2.91E-01 | 19.69  | 19.94 | 3.23E-01 | 57.84  | 27.71 | 3.68E-02 |
| cg25144207   | 8.84   | 3.77  | 1.89E-02 | 11.99  | 5.34  | 2.48E-02 | -3.18   | 9.73   | 7.44E-01 | 11.62  | 9.04  | 1.99E-01 | 7.47   | 8.89  | 4.01E-01 |
| cg25024001   | 66.98  | 28.54 | 1.89E-02 | 71.19  | 38.49 | 6.44E-02 | 171.59  | 162.97 | 2.92E-01 | 108.56 | 88.32 | 2.19E-01 | 35.68  | 50.84 | 4.83E-01 |
| cg21279603   | 11.05  | 4.71  | 1.89E-02 | 13.85  | 6.51  | 3.34E-02 | 10.87   | 9.52   | 2.53E-01 | 1.56   | 17.60 | 9.30E-01 | 6.46   | 11.75 | 5.83E-01 |
| cg15174564   | 12.29  | 5.24  | 1.89E-02 | 7.15   | 8.71  | 4.11E-01 | 9.85    | 9.70   | 3.10E-01 | 25.92  | 11.58 | 2.52E-02 | 10.78  | 13.90 | 4.38E-01 |
| cg22599005   | 15.31  | 6.52  | 1.89E-02 | 9.77   | 9.85  | 3.21E-01 | 21.12   | 12.10  | 8.10E-02 | 2.03   | 19.67 | 9.18E-01 | 29.02  | 16.27 | 7.45E-02 |
| cg15136597   | 38.00  | 16.19 | 1.89E-02 | 60.12  | 36.43 | 9.89E-02 | -34.63  | 173.03 | 8.41E-01 | 33.70  | 19.44 | 8.31E-02 | 30.55  | 51.22 | 5.51E-01 |
| cg01641509   | -21.48 | 9.15  | 1.89E-02 | -48.72 | 22.85 | 3.30E-02 | -30.03  | 29.63  | 3.11E-01 | -13.38 | 11.27 | 2.35E-01 | -23.25 | 31.36 | 4.58E-01 |
| cg14508237   | 12.75  | 5.43  | 1.89E-02 | 23.26  | 10.18 | 2.23E-02 | -0.61   | 13.14  | 9.63E-01 | 12.03  | 8.39  | 1.51E-01 | 9.45   | 15.42 | 5.40E-01 |
| cg22666015   | 5.58   | 2.38  | 1.90E-02 | 3.76   | 3.14  | 2.32E-01 | 10.84   | 5.65   | 5.49E-02 | 10.31  | 6.86  | 1.33E-01 | 2.06   | 6.61  | 7.55E-01 |
| cg14265823   | 14.01  | 5.97  | 1.90E-02 | 20.00  | 10.94 | 6.76E-02 | 5.38    | 13.80  | 6.97E-01 | 22.25  | 11.95 | 6.26E-02 | 5.63   | 11.58 | 6.27E-01 |
| cg27068650   | 16.55  | 7.05  | 1.90E-02 | 29.19  | 20.39 | 1.52E-01 | 12.83   | 24.88  | 6.06E-01 | 15.87  | 8.22  | 5.35E-02 | 5.31   | 28.01 | 8.50E-01 |
| cg02152417   | 9.18   | 3.91  | 1.90E-02 | 2.62   | 7.75  | 7.36E-01 | 18.89   | 7.22   | 8.88E-03 | 4.80   | 7.17  | 5.03E-01 | 10.01  | 10.01 | 3.17E-01 |
| cg06003958   | -13.14 | 5.60  | 1.90E-02 | -32.38 | 13.98 | 2.05E-02 | 8.13    | 25.29  | 7.48E-01 | -9.10  | 4.91  | 6.38E-02 | -20.31 | 14.52 | 1.62E-01 |
| cg25535435   | -15.16 | 6.46  | 1.90E-02 | -22.13 | 20.46 | 2.80E-01 | -24.52  | 29.85  | 4.12E-01 | -14.74 | 7.24  | 4.16E-02 | -0.90  | 27.26 | 9.74E-01 |
| cg14508405   | -11.03 | 4.70  | 1.90E-02 | -0.55  | 9.03  | 9.51E-01 | -23.24  | 13.46  | 8.43E-02 | -13.16 | 6.66  | 4.80E-02 | -13.70 | 14.30 | 3.38E-01 |
| cg10432569   | -10.50 | 4.48  | 1.90E-02 | -12.11 | 8.92  | 1.75E-01 | -8.96   | 13.82  | 5.17E-01 | -7.98  | 6.50  | 2.20E-01 | -16.14 | 10.88 | 1.38E-01 |
| cg14970666   | 23.89  | 10.18 | 1.90E-02 | 40.56  | 18.28 | 2.65E-02 | 30.32   | 25.32  | 2.31E-01 | 21.71  | 20.63 | 2.93E-01 | 3.91   | 19.10 | 8.38E-01 |
| cg27215108   | -46.72 | 19.92 | 1.90E-02 | -60.50 | 25.93 | 1.96E-02 | 30.27   | 60.29  | 6.16E-01 | 5.99   | 70.48 | 9.32E-01 | -66.99 | 42.36 | 1.14E-01 |
| cg09419983   | 22.14  | 9.44  | 1.90E-02 | 52.38  | 26.67 | 4.95E-02 | -1.39   | 21.16  | 9.47E-01 | 23.43  | 12.78 | 6.69E-02 | 23.61  | 26.08 | 3.65E-01 |
| cg17603321   | 39.36  | 16.78 | 1.90E-02 | 44.80  | 19.02 | 1.85E-02 | 63.29   | 130.16 | 6.27E-01 | 84.40  | 94.61 | 3.72E-01 | 4.52   | 40.26 | 9.11E-01 |



|            |        |       |          |        |       |          |        |        |          |         |       |          |        |       |          |
|------------|--------|-------|----------|--------|-------|----------|--------|--------|----------|---------|-------|----------|--------|-------|----------|
| cg14965694 | 7.43   | 3.17  | 1.90E-02 | 11.70  | 4.71  | 1.29E-02 | 8.40   | 7.52   | 2.64E-01 | 9.46    | 11.28 | 4.02E-01 | -0.34  | 5.86  | 9.54E-01 |
| cg13482010 | -11.29 | 4.81  | 1.90E-02 | -13.64 | 9.38  | 1.46E-01 | 6.29   | 15.69  | 6.88E-01 | -14.55  | 6.77  | 3.17E-02 | -6.87  | 12.99 | 5.97E-01 |
| cg27016863 | -44.64 | 19.03 | 1.90E-02 | -32.65 | 22.50 | 1.47E-01 | -14.96 | 162.62 | 9.27E-01 | -25.53  | 68.58 | 7.10E-01 | -98.57 | 43.21 | 2.26E-02 |
| cg01203365 | 27.22  | 11.60 | 1.90E-02 | 19.21  | 21.75 | 3.77E-01 | 42.58  | 42.82  | 3.20E-01 | 23.08   | 16.43 | 1.60E-01 | 49.69  | 30.66 | 1.05E-01 |
| cg01695225 | 20.97  | 8.94  | 1.90E-02 | 24.48  | 20.58 | 2.34E-01 | 26.65  | 22.27  | 2.31E-01 | 22.04   | 13.89 | 1.13E-01 | 12.40  | 18.40 | 5.00E-01 |
| cg13587564 | 25.75  | 10.98 | 1.90E-02 | 41.50  | 13.11 | 1.55E-03 | 3.93   | 19.93  | 8.44E-01 | 9.39    | 18.65 | 6.15E-01 | 50.56  | 30.55 | 9.79E-02 |
| cg02102872 | -11.17 | 4.76  | 1.90E-02 | -16.69 | 8.34  | 4.53E-02 | -5.41  | 12.27  | 6.60E-01 | -6.19   | 8.06  | 4.42E-01 | -15.83 | 11.43 | 1.66E-01 |
| cg09777775 | 14.54  | 6.20  | 1.90E-02 | 44.18  | 21.04 | 3.58E-02 | 18.86  | 24.37  | 4.39E-01 | 10.93   | 7.09  | 1.23E-01 | 13.39  | 21.28 | 5.29E-01 |
| cg14236758 | 8.68   | 3.70  | 1.90E-02 | 5.26   | 4.50  | 2.42E-01 | 16.40  | 9.81   | 9.46E-02 | 24.55   | 14.45 | 8.92E-02 | 10.27  | 10.99 | 3.50E-01 |
| cg08687163 | 17.50  | 7.46  | 1.90E-02 | 18.36  | 12.03 | 1.27E-01 | 16.47  | 13.24  | 2.13E-01 | 7.50    | 20.80 | 7.19E-01 | 25.05  | 18.12 | 1.67E-01 |
| cg25967505 | 30.40  | 12.96 | 1.90E-02 | 1.22   | 38.54 | 9.75E-01 | 110.41 | 144.48 | 4.45E-01 | 32.40   | 14.78 | 2.84E-02 | 40.49  | 39.06 | 3.00E-01 |
| cg16904686 | -10.07 | 4.29  | 1.90E-02 | -4.42  | 6.94  | 5.24E-01 | -12.21 | 7.85   | 1.20E-01 | -27.38  | 13.39 | 4.09E-02 | -8.85  | 9.23  | 3.38E-01 |
| cg13485874 | 20.10  | 8.57  | 1.90E-02 | 18.94  | 16.10 | 2.39E-01 | 2.64   | 35.22  | 9.40E-01 | 19.58   | 11.52 | 8.93E-02 | 35.82  | 26.49 | 1.76E-01 |
| cg27049194 | -50.25 | 21.43 | 1.90E-02 | -34.95 | 29.25 | 2.32E-01 | -18.21 | 69.98  | 7.95E-01 | -106.61 | 51.63 | 3.89E-02 | -57.88 | 48.20 | 2.30E-01 |
| cg24168061 | -12.84 | 5.47  | 1.90E-02 | -7.60  | 13.47 | 5.73E-01 | -3.86  | 20.14  | 8.48E-01 | -15.15  | 6.70  | 2.38E-02 | -12.69 | 17.82 | 4.76E-01 |
| cg00879497 | -23.73 | 10.12 | 1.90E-02 | -30.20 | 14.69 | 3.97E-02 | -35.29 | 23.31  | 1.30E-01 | -14.50  | 26.87 | 5.89E-01 | -3.52  | 22.91 | 8.78E-01 |
| cg24731441 | 18.54  | 7.91  | 1.90E-02 | 22.89  | 11.16 | 4.03E-02 | 12.01  | 19.42  | 5.36E-01 | 11.19   | 18.60 | 5.47E-01 | 20.06  | 20.28 | 3.23E-01 |
| cg17139085 | 7.43   | 3.17  | 1.90E-02 | 7.72   | 4.59  | 9.27E-02 | 14.74  | 6.56   | 2.47E-02 | -2.70   | 8.95  | 7.63E-01 | 3.97   | 7.76  | 6.09E-01 |
| cg20792833 | -15.97 | 6.81  | 1.90E-02 | -3.96  | 9.48  | 6.76E-01 | -29.96 | 18.08  | 9.76E-02 | -13.52  | 11.57 | 2.43E-01 | -31.98 | 13.57 | 1.84E-02 |
| cg12975230 | 13.01  | 5.55  | 1.90E-02 | 50.38  | 26.39 | 5.63E-02 | 13.53  | 33.67  | 6.88E-01 | 9.45    | 6.24  | 1.30E-01 | 21.35  | 14.94 | 1.53E-01 |
| cg22373181 | 22.81  | 9.73  | 1.90E-02 | 27.69  | 33.46 | 4.08E-01 | 141.25 | 144.31 | 3.28E-01 | 22.29   | 10.59 | 3.54E-02 | 15.30  | 37.36 | 6.82E-01 |
| cg09413013 | 10.66  | 4.55  | 1.90E-02 | 8.51   | 6.96  | 2.21E-01 | 17.74  | 9.04   | 4.96E-02 | 3.40    | 12.92 | 7.93E-01 | 10.80  | 10.27 | 2.93E-01 |
| cg26687072 | 22.23  | 9.48  | 1.90E-02 | 23.74  | 20.08 | 2.37E-01 | 26.15  | 20.74  | 2.07E-01 | 14.68   | 13.94 | 2.92E-01 | 44.37  | 29.18 | 1.28E-01 |
| cg21904726 | -38.18 | 16.28 | 1.90E-02 | -57.18 | 21.38 | 7.47E-03 | -31.93 | 44.56  | 4.74E-01 | -17.84  | 63.20 | 7.78E-01 | 1.98   | 34.70 | 9.54E-01 |
| cg17759564 | 14.39  | 6.13  | 1.90E-02 | 20.05  | 16.37 | 2.21E-01 | 3.43   | 20.35  | 8.66E-01 | 15.64   | 7.29  | 3.18E-02 | 2.82   | 25.10 | 9.11E-01 |
| cg08182446 | 14.27  | 6.09  | 1.90E-02 | 24.85  | 14.33 | 8.29E-02 | 19.22  | 24.83  | 4.39E-01 | 12.03   | 7.83  | 1.24E-01 | 8.80   | 15.46 | 5.69E-01 |
| cg13476133 | 18.65  | 7.95  | 1.90E-02 | 10.11  | 18.55 | 5.86E-01 | 48.55  | 41.16  | 2.38E-01 | 24.79   | 10.34 | 1.66E-02 | 1.71   | 18.37 | 9.26E-01 |
| cg18308535 | 21.02  | 8.96  | 1.90E-02 | 9.14   | 17.96 | 6.11E-01 | 20.72  | 18.27  | 2.57E-01 | 30.05   | 14.97 | 4.48E-02 | 19.66  | 22.99 | 3.93E-01 |
| cg17844831 | 8.00   | 3.41  | 1.90E-02 | 7.42   | 4.55  | 1.03E-01 | 10.69  | 8.10   | 1.87E-01 | 7.27    | 10.46 | 4.87E-01 | 7.48   | 8.70  | 3.89E-01 |
| cg12275370 | 13.89  | 5.92  | 1.90E-02 | 11.18  | 8.17  | 1.71E-01 | 24.96  | 13.09  | 5.66E-02 | 15.04   | 18.86 | 4.25E-01 | 8.30   | 14.35 | 5.63E-01 |
| cg19938567 | -13.08 | 5.58  | 1.91E-02 | -17.79 | 7.48  | 1.74E-02 | -15.35 | 14.22  | 2.80E-01 | 13.81   | 24.93 | 5.80E-01 | -6.32  | 11.41 | 5.79E-01 |
| cg07912416 | 14.70  | 6.27  | 1.91E-02 | 18.57  | 10.15 | 6.74E-02 | 9.46   | 11.65  | 4.17E-01 | 14.89   | 14.68 | 3.10E-01 | 14.74  | 16.39 | 3.68E-01 |
| cg08219438 | 20.96  | 8.94  | 1.91E-02 | 41.91  | 34.03 | 2.18E-01 | 44.92  | 142.14 | 7.52E-01 | 20.86   | 9.60  | 2.98E-02 | -3.14  | 36.41 | 9.31E-01 |
| cg22558265 | 16.40  | 7.00  | 1.91E-02 | 6.92   | 13.11 | 5.97E-01 | 40.56  | 27.13  | 1.35E-01 | 12.15   | 9.94  | 2.22E-01 | 37.34  | 17.88 | 3.68E-02 |
| cg25643229 | -16.25 | 6.93  | 1.91E-02 | -15.40 | 10.83 | 1.55E-01 | -25.87 | 16.15  | 1.09E-01 | -21.59  | 14.14 | 1.27E-01 | 0.06   | 17.01 | 9.97E-01 |

|            |        |       |          |        |       |          |         |        |          |        |       |          |        |       |          |
|------------|--------|-------|----------|--------|-------|----------|---------|--------|----------|--------|-------|----------|--------|-------|----------|
| cg07530947 | 8.35   | 3.56  | 1.91E-02 | 5.67   | 4.98  | 2.54E-01 | 19.81   | 8.76   | 2.38E-02 | 9.23   | 9.26  | 3.19E-01 | 4.62   | 8.54  | 5.89E-01 |
| cg13838599 | -10.22 | 4.36  | 1.91E-02 | -13.51 | 9.55  | 1.57E-01 | -25.84  | 19.85  | 1.93E-01 | -11.72 | 6.97  | 9.27E-02 | -4.47  | 7.35  | 5.43E-01 |
| cg13652372 | -18.60 | 7.93  | 1.91E-02 | -1.36  | 19.01 | 9.43E-01 | -32.70  | 46.57  | 4.83E-01 | -20.72 | 9.34  | 2.65E-02 | -32.93 | 29.08 | 2.57E-01 |
| cg23594208 | 19.26  | 8.22  | 1.91E-02 | 12.13  | 18.98 | 5.23E-01 | 42.60   | 20.63  | 3.89E-02 | 21.28  | 11.23 | 5.82E-02 | -9.71  | 23.83 | 6.84E-01 |
| cg15492003 | 59.81  | 25.51 | 1.91E-02 | 35.60  | 31.70 | 2.61E-01 | 99.29   | 107.83 | 3.57E-01 | 106.39 | 79.44 | 1.80E-01 | 104.67 | 58.06 | 7.14E-02 |
| cg24207176 | 25.37  | 10.82 | 1.91E-02 | 33.23  | 16.61 | 4.54E-02 | 6.03    | 28.10  | 8.30E-01 | 52.28  | 28.19 | 6.36E-02 | 9.51   | 20.46 | 6.42E-01 |
| cg20064008 | 16.85  | 7.19  | 1.91E-02 | 22.68  | 17.25 | 1.88E-01 | 52.23   | 33.76  | 1.22E-01 | 12.08  | 8.67  | 1.64E-01 | 23.87  | 23.44 | 3.09E-01 |
| cg25050951 | 15.30  | 6.53  | 1.91E-02 | 27.25  | 13.48 | 4.32E-02 | 2.97    | 16.99  | 8.61E-01 | 11.97  | 10.50 | 2.54E-01 | 16.62  | 13.58 | 2.21E-01 |
| cg06631603 | 27.22  | 11.61 | 1.91E-02 | 35.96  | 35.37 | 3.09E-01 | -155.62 | 171.44 | 3.64E-01 | 26.05  | 12.77 | 4.14E-02 | 41.61  | 47.26 | 3.79E-01 |
| cg15831875 | 21.21  | 9.05  | 1.91E-02 | 13.74  | 12.58 | 2.75E-01 | 29.73   | 20.58  | 1.48E-01 | 46.05  | 27.52 | 9.42E-02 | 18.63  | 21.29 | 3.82E-01 |
| cg10568066 | 2.75   | 1.17  | 1.91E-02 | 1.69   | 1.62  | 2.97E-01 | 4.14    | 2.31   | 7.26E-02 | 3.73   | 4.23  | 3.78E-01 | 3.69   | 3.18  | 2.46E-01 |
| cg00394823 | 30.32  | 12.94 | 1.91E-02 | 24.08  | 16.60 | 1.47E-01 | 27.30   | 35.34  | 4.40E-01 | 62.94  | 46.22 | 1.73E-01 | 39.38  | 30.45 | 1.96E-01 |
| cg18323018 | 18.55  | 7.91  | 1.91E-02 | 14.43  | 17.64 | 4.13E-01 | 17.85   | 16.97  | 2.93E-01 | 17.98  | 14.87 | 2.27E-01 | 22.39  | 14.50 | 1.23E-01 |
| cg11913072 | -23.90 | 10.20 | 1.91E-02 | -30.54 | 35.50 | 3.90E-01 | -167.86 | 135.79 | 2.16E-01 | -22.66 | 10.97 | 3.88E-02 | -17.75 | 46.83 | 7.05E-01 |
| cg25250431 | 15.02  | 6.41  | 1.91E-02 | 15.06  | 15.91 | 3.44E-01 | 15.78   | 27.89  | 5.72E-01 | 13.78  | 7.53  | 6.74E-02 | 28.98  | 25.91 | 2.63E-01 |
| cg22888055 | 11.23  | 4.79  | 1.91E-02 | 15.26  | 8.55  | 7.44E-02 | 13.58   | 10.01  | 1.75E-01 | 14.58  | 10.06 | 1.47E-01 | 0.08   | 9.99  | 9.94E-01 |
| cg05080940 | 7.56   | 3.23  | 1.91E-02 | 8.05   | 5.10  | 1.15E-01 | 13.48   | 6.14   | 2.82E-02 | -1.68  | 7.33  | 8.19E-01 | 7.26   | 8.94  | 4.17E-01 |
| cg12191293 | 18.99  | 8.10  | 1.91E-02 | 27.34  | 11.78 | 2.03E-02 | 22.48   | 19.54  | 2.50E-01 | 32.68  | 30.74 | 2.88E-01 | -0.29  | 15.17 | 9.85E-01 |
| cg23718633 | 25.33  | 10.81 | 1.91E-02 | 62.08  | 18.52 | 8.04E-04 | 0.62    | 26.29  | 9.81E-01 | 18.63  | 10.99 | 9.01E-02 | 17.91  | 13.71 | 1.91E-01 |
| cg21341487 | 6.58   | 2.81  | 1.91E-02 | 5.81   | 3.71  | 1.17E-01 | 14.38   | 7.12   | 4.35E-02 | 3.45   | 7.85  | 6.60E-01 | 3.99   | 7.42  | 5.90E-01 |
| cg13912849 | 21.89  | 9.34  | 1.91E-02 | 18.19  | 21.02 | 3.87E-01 | -15.11  | 43.49  | 7.28E-01 | 23.95  | 11.46 | 3.66E-02 | 33.60  | 30.90 | 2.77E-01 |
| cg00832923 | 18.62  | 7.95  | 1.91E-02 | -4.92  | 17.07 | 7.73E-01 | 22.53   | 26.40  | 3.93E-01 | 23.16  | 10.32 | 2.49E-02 | 39.33  | 25.18 | 1.18E-01 |
| cg26107076 | -20.03 | 8.55  | 1.91E-02 | -62.53 | 29.36 | 3.32E-02 | -78.78  | 159.97 | 6.22E-01 | -16.71 | 9.12  | 6.68E-02 | 5.87   | 47.11 | 9.01E-01 |
| cg26370409 | 41.84  | 17.86 | 1.91E-02 | 57.79  | 21.44 | 7.04E-03 | -95.84  | 96.68  | 3.22E-01 | 31.25  | 54.14 | 5.64E-01 | 15.61  | 41.23 | 7.05E-01 |
| cg07087018 | -24.08 | 10.28 | 1.91E-02 | -20.79 | 25.99 | 4.24E-01 | -35.49  | 130.86 | 7.86E-01 | -21.43 | 11.94 | 7.26E-02 | -48.94 | 33.07 | 1.39E-01 |
| cg15856599 | 26.03  | 11.11 | 1.91E-02 | 31.54  | 16.45 | 5.53E-02 | 20.07   | 29.86  | 5.02E-01 | 34.30  | 29.59 | 2.46E-01 | 15.25  | 21.61 | 4.80E-01 |
| cg12872357 | 7.21   | 3.08  | 1.91E-02 | 4.70   | 5.19  | 3.65E-01 | 10.16   | 6.86   | 1.39E-01 | 8.22   | 5.19  | 1.13E-01 | 6.49   | 9.91  | 5.12E-01 |
| cg21390363 | -10.40 | 4.44  | 1.91E-02 | -11.56 | 6.43  | 7.21E-02 | -15.36  | 10.74  | 1.53E-01 | -10.40 | 11.84 | 3.80E-01 | -3.79  | 9.64  | 6.94E-01 |
| cg08452095 | -15.78 | 6.73  | 1.91E-02 | -21.83 | 18.70 | 2.43E-01 | 5.66    | 26.01  | 8.28E-01 | -15.08 | 7.84  | 5.46E-02 | -33.44 | 26.19 | 2.02E-01 |
| cg16777106 | -10.43 | 4.45  | 1.91E-02 | -2.20  | 12.48 | 8.60E-01 | -9.36   | 18.82  | 6.19E-01 | -12.39 | 5.13  | 1.58E-02 | -4.73  | 17.58 | 7.88E-01 |
| cg14690220 | 37.99  | 16.22 | 1.91E-02 | 47.13  | 46.91 | 3.15E-01 | -231.76 | 160.97 | 1.50E-01 | 41.34  | 18.27 | 2.37E-02 | 25.96  | 56.30 | 6.45E-01 |
| cg00632379 | -8.94  | 3.82  | 1.91E-02 | -11.89 | 9.98  | 2.34E-01 | 8.07    | 20.90  | 6.99E-01 | -9.92  | 4.46  | 2.60E-02 | -2.24  | 12.97 | 8.63E-01 |
| cg25437886 | 4.62   | 1.97  | 1.91E-02 | 4.71   | 2.82  | 9.46E-02 | 10.07   | 4.81   | 3.62E-02 | 1.75   | 3.98  | 6.60E-01 | 1.96   | 6.34  | 7.57E-01 |
| cg23165899 | 20.95  | 8.94  | 1.91E-02 | 35.52  | 12.88 | 5.83E-03 | -0.15   | 17.78  | 9.93E-01 | 41.14  | 29.47 | 1.63E-01 | 12.69  | 14.41 | 3.78E-01 |
| cg03733433 | -52.70 | 22.50 | 1.91E-02 | -38.84 | 54.23 | 4.74E-01 | -116.90 | 240.15 | 6.26E-01 | -59.60 | 26.25 | 2.32E-02 | -14.52 | 77.23 | 8.51E-01 |

|            |        |       |          |        |       |          |         |        |          |        |       |          |        |       |          |
|------------|--------|-------|----------|--------|-------|----------|---------|--------|----------|--------|-------|----------|--------|-------|----------|
| cg08668316 | 13.89  | 5.93  | 1.92E-02 | 22.46  | 11.32 | 4.72E-02 | 7.53    | 13.31  | 5.72E-01 | 5.92   | 12.89 | 6.46E-01 | 15.79  | 10.56 | 1.35E-01 |
| cg08608240 | -24.85 | 10.61 | 1.92E-02 | -30.67 | 13.71 | 2.53E-02 | 28.87   | 45.34  | 5.24E-01 | -14.47 | 27.47 | 5.98E-01 | -29.91 | 23.87 | 2.10E-01 |
| cg12550344 | -9.47  | 4.04  | 1.92E-02 | -8.33  | 6.58  | 2.06E-01 | -16.98  | 8.36   | 4.22E-02 | -8.81  | 9.45  | 3.52E-01 | -3.61  | 8.92  | 6.86E-01 |
| cg06909503 | -13.03 | 5.56  | 1.92E-02 | -31.29 | 16.10 | 5.20E-02 | 11.63   | 29.83  | 6.97E-01 | -11.36 | 6.33  | 7.26E-02 | -12.59 | 20.57 | 5.40E-01 |
| cg25537119 | -11.50 | 4.91  | 1.92E-02 | -25.70 | 9.00  | 4.31E-03 | -13.88  | 14.92  | 3.52E-01 | -7.16  | 4.78  | 1.34E-01 | -2.60  | 12.29 | 8.33E-01 |
| cg10610428 | -11.27 | 4.81  | 1.92E-02 | -14.95 | 7.45  | 4.49E-02 | -5.64   | 11.12  | 6.12E-01 | -10.29 | 11.78 | 3.82E-01 | -9.90  | 10.06 | 3.25E-01 |
| cg07535477 | 17.18  | 7.33  | 1.92E-02 | 26.48  | 13.34 | 4.71E-02 | -0.17   | 56.26  | 9.98E-01 | 13.07  | 9.45  | 1.67E-01 | 16.64  | 26.22 | 5.26E-01 |
| cg23671699 | 8.06   | 3.44  | 1.92E-02 | 11.27  | 4.60  | 1.42E-02 | 1.01    | 8.33   | 9.04E-01 | 5.28   | 12.34 | 6.69E-01 | 6.08   | 7.88  | 4.40E-01 |
| cg18531779 | 12.43  | 5.31  | 1.92E-02 | -0.04  | 14.49 | 9.98E-01 | 11.81   | 14.34  | 4.10E-01 | 16.35  | 6.46  | 1.14E-02 | -4.02  | 22.81 | 8.60E-01 |
| cg23224128 | 20.74  | 8.86  | 1.92E-02 | -2.67  | 17.54 | 8.79E-01 | 31.28   | 17.89  | 8.03E-02 | 20.98  | 14.95 | 1.61E-01 | 41.92  | 22.48 | 6.22E-02 |
| cg17476951 | 8.56   | 3.65  | 1.92E-02 | 8.68   | 4.82  | 7.21E-02 | 14.87   | 9.95   | 1.35E-01 | 8.73   | 9.39  | 3.53E-01 | 1.80   | 9.78  | 8.54E-01 |
| cg05327187 | 11.87  | 5.07  | 1.92E-02 | 13.08  | 7.23  | 7.03E-02 | 6.48    | 11.27  | 5.65E-01 | 10.58  | 19.23 | 5.82E-01 | 14.35  | 10.44 | 1.69E-01 |
| cg02343602 | -16.11 | 6.88  | 1.92E-02 | -28.54 | 21.19 | 1.78E-01 | -15.90  | 30.18  | 5.98E-01 | -14.19 | 7.82  | 6.95E-02 | -19.02 | 26.53 | 4.73E-01 |
| cg01781974 | 28.20  | 12.04 | 1.92E-02 | 54.64  | 26.92 | 4.24E-02 | -64.90  | 77.55  | 4.03E-01 | 24.70  | 14.83 | 9.59E-02 | 21.87  | 35.26 | 5.35E-01 |
| cg07255925 | 19.36  | 8.27  | 1.92E-02 | 41.84  | 17.59 | 1.74E-02 | 27.80   | 39.15  | 4.78E-01 | 14.58  | 10.38 | 1.60E-01 | -3.75  | 26.13 | 8.86E-01 |
| cg26672614 | 44.22  | 18.88 | 1.92E-02 | 33.12  | 62.70 | 5.97E-01 | -237.01 | 244.31 | 3.32E-01 | 53.47  | 20.63 | 9.54E-03 | -33.40 | 73.90 | 6.51E-01 |
| cg17138539 | 12.77  | 5.45  | 1.92E-02 | 17.15  | 14.36 | 2.33E-01 | 35.88   | 22.19  | 1.06E-01 | 8.70   | 6.35  | 1.71E-01 | 29.55  | 22.61 | 1.91E-01 |
| cg13670531 | -17.59 | 7.51  | 1.92E-02 | -22.76 | 14.39 | 1.14E-01 | -0.97   | 36.58  | 9.79E-01 | -16.04 | 9.92  | 1.06E-01 | -19.19 | 22.41 | 3.92E-01 |
| cg26418770 | -9.88  | 4.22  | 1.92E-02 | -11.14 | 6.79  | 1.01E-01 | -6.04   | 11.90  | 6.12E-01 | -17.70 | 7.77  | 2.27E-02 | 2.06   | 9.60  | 8.30E-01 |
| cg13581015 | 5.43   | 2.32  | 1.92E-02 | 4.32   | 3.18  | 1.75E-01 | 6.98    | 5.09   | 1.70E-01 | 9.05   | 6.08  | 1.36E-01 | 3.19   | 6.81  | 6.39E-01 |
| cg01981354 | 23.65  | 10.10 | 1.92E-02 | 22.32  | 13.41 | 9.60E-02 | 51.56   | 41.52  | 2.14E-01 | 20.18  | 32.82 | 5.39E-01 | 21.61  | 19.14 | 2.59E-01 |
| cg23994714 | -15.83 | 6.76  | 1.92E-02 | -13.95 | 9.86  | 1.57E-01 | -16.65  | 16.25  | 3.05E-01 | -18.83 | 19.43 | 3.33E-01 | -17.46 | 13.96 | 2.11E-01 |
| cg27627006 | -23.85 | 10.19 | 1.92E-02 | -19.18 | 13.94 | 1.69E-01 | -36.26  | 24.61  | 1.41E-01 | -13.41 | 34.13 | 6.94E-01 | -30.20 | 22.51 | 1.80E-01 |
| cg12046882 | 17.77  | 7.59  | 1.92E-02 | 18.45  | 13.52 | 1.72E-01 | -2.05   | 22.72  | 9.28E-01 | 23.11  | 11.65 | 4.72E-02 | 15.92  | 19.68 | 4.19E-01 |
| cg13778140 | 18.79  | 8.02  | 1.92E-02 | 31.09  | 15.54 | 4.55E-02 | 19.33   | 28.34  | 4.95E-01 | 16.92  | 10.83 | 1.18E-01 | -3.34  | 24.90 | 8.93E-01 |
| cg10315347 | 28.84  | 12.32 | 1.92E-02 | 72.46  | 29.97 | 1.56E-02 | 16.46   | 114.31 | 8.86E-01 | 22.10  | 14.65 | 1.32E-01 | 6.94   | 36.74 | 8.50E-01 |
| cg17070935 | 12.67  | 5.41  | 1.92E-02 | 10.12  | 10.41 | 3.31E-01 | 11.79   | 18.96  | 5.34E-01 | 13.62  | 7.29  | 6.19E-02 | 15.15  | 17.36 | 3.83E-01 |
| cg09368485 | 8.36   | 3.57  | 1.92E-02 | 10.96  | 4.62  | 1.76E-02 | 8.72    | 9.00   | 3.32E-01 | 1.01   | 12.35 | 9.35E-01 | 2.13   | 8.93  | 8.11E-01 |
| cg16285854 | -16.96 | 7.24  | 1.92E-02 | -9.83  | 17.75 | 5.80E-01 | -19.04  | 29.57  | 5.20E-01 | -15.44 | 8.63  | 7.34E-02 | -48.18 | 27.72 | 8.22E-02 |
| cg21115391 | -8.12  | 3.47  | 1.92E-02 | -10.69 | 6.10  | 7.97E-02 | -8.61   | 10.25  | 4.01E-01 | -8.57  | 5.36  | 1.10E-01 | -0.65  | 9.14  | 9.44E-01 |
| cg01704924 | -18.05 | 7.71  | 1.92E-02 | -6.95  | 12.41 | 5.75E-01 | -21.11  | 19.59  | 2.81E-01 | -25.22 | 15.82 | 1.11E-01 | -27.55 | 16.38 | 9.26E-02 |
| cg05161682 | -14.64 | 6.25  | 1.92E-02 | -26.56 | 8.50  | 1.77E-03 | -4.79   | 13.73  | 7.27E-01 | -7.20  | 18.74 | 7.01E-01 | -5.01  | 11.41 | 6.60E-01 |
| cg04368664 | 17.72  | 7.57  | 1.92E-02 | 30.06  | 14.39 | 3.68E-02 | 9.86    | 13.05  | 4.50E-01 | 0.23   | 17.33 | 9.89E-01 | 30.78  | 17.08 | 7.15E-02 |
| cg05155840 | 19.99  | 8.54  | 1.92E-02 | 16.74  | 22.43 | 4.55E-01 | 19.38   | 52.52  | 7.12E-01 | 20.25  | 10.18 | 4.67E-02 | 22.43  | 24.15 | 3.53E-01 |
| cg06822067 | -15.77 | 6.74  | 1.92E-02 | -24.42 | 13.45 | 6.94E-02 | -13.19  | 15.69  | 4.01E-01 | -5.51  | 11.95 | 6.45E-01 | -22.15 | 13.58 | 1.03E-01 |

|            |        |       |          |        |       |          |         |        |          |        |       |          |         |       |          |
|------------|--------|-------|----------|--------|-------|----------|---------|--------|----------|--------|-------|----------|---------|-------|----------|
| cg10625737 | -10.50 | 4.49  | 1.92E-02 | -11.51 | 10.91 | 2.91E-01 | 4.97    | 25.18  | 8.43E-01 | -10.47 | 5.43  | 5.37E-02 | -13.40  | 13.16 | 3.08E-01 |
| cg22665655 | 26.84  | 11.47 | 1.93E-02 | 91.80  | 39.50 | 2.01E-02 | -17.14  | 168.62 | 9.19E-01 | 21.64  | 11.16 | 5.24E-02 | 13.65   | 49.24 | 7.82E-01 |
| cg00489394 | 11.66  | 4.98  | 1.93E-02 | 7.89   | 6.24  | 2.07E-01 | 22.70   | 16.86  | 1.78E-01 | -6.47  | 21.33 | 7.62E-01 | 22.60   | 10.58 | 3.27E-02 |
| cg10898067 | -12.51 | 5.35  | 1.93E-02 | -17.75 | 9.51  | 6.20E-02 | -4.16   | 11.28  | 7.12E-01 | -16.72 | 9.08  | 6.58E-02 | -1.62   | 15.89 | 9.19E-01 |
| cg04592201 | 18.69  | 7.99  | 1.93E-02 | 4.62   | 21.13 | 8.27E-01 | 68.87   | 31.85  | 3.06E-02 | 16.56  | 9.22  | 7.26E-02 | 24.73   | 30.82 | 4.22E-01 |
| cg25642825 | -28.40 | 12.13 | 1.93E-02 | -40.34 | 33.68 | 2.31E-01 | -109.88 | 152.42 | 4.71E-01 | -20.66 | 13.64 | 1.30E-01 | -84.32  | 45.08 | 6.14E-02 |
| cg19004465 | -26.93 | 11.51 | 1.93E-02 | -34.61 | 14.56 | 1.75E-02 | -56.20  | 51.26  | 2.73E-01 | -44.70 | 37.42 | 2.32E-01 | 7.56    | 23.98 | 7.52E-01 |
| cg20740029 | 16.58  | 7.09  | 1.93E-02 | 19.09  | 10.72 | 7.48E-02 | 32.34   | 17.81  | 6.94E-02 | 17.12  | 21.05 | 4.16E-01 | 4.04    | 13.13 | 7.58E-01 |
| cg08040428 | 25.61  | 10.94 | 1.93E-02 | 45.45  | 15.87 | 4.19E-03 | 8.05    | 36.47  | 8.25E-01 | 7.42   | 25.62 | 7.72E-01 | 7.63    | 21.81 | 7.26E-01 |
| cg02935024 | -17.39 | 7.43  | 1.93E-02 | -29.45 | 14.09 | 3.66E-02 | -17.48  | 16.04  | 2.76E-01 | -5.04  | 13.07 | 7.00E-01 | -20.72  | 17.30 | 2.31E-01 |
| cg10500121 | 22.16  | 9.47  | 1.93E-02 | 39.34  | 22.00 | 7.37E-02 | -55.36  | 56.18  | 3.24E-01 | 24.24  | 11.77 | 3.94E-02 | 5.38    | 25.40 | 8.32E-01 |
| cg16102971 | -14.04 | 6.00  | 1.93E-02 | -21.95 | 9.29  | 1.81E-02 | -3.25   | 14.93  | 8.28E-01 | -19.60 | 16.06 | 2.22E-01 | -5.76   | 11.30 | 6.10E-01 |
| cg23552637 | 19.02  | 8.13  | 1.93E-02 | 18.53  | 19.13 | 3.33E-01 | 29.90   | 19.15  | 1.18E-01 | 9.44   | 11.00 | 3.91E-01 | 54.76   | 26.53 | 3.90E-02 |
| cg17387903 | -9.26  | 3.96  | 1.93E-02 | -8.34  | 5.93  | 1.60E-01 | -11.82  | 9.07   | 1.93E-01 | -6.72  | 9.13  | 4.62E-01 | -11.56  | 9.42  | 2.20E-01 |
| cg08167066 | 23.34  | 9.98  | 1.93E-02 | -1.90  | 27.85 | 9.46E-01 | -93.68  | 94.36  | 3.21E-01 | 31.16  | 10.20 | 2.26E-03 | 10.49   | 29.21 | 7.19E-01 |
| cg12769732 | -12.73 | 5.44  | 1.93E-02 | -24.24 | 9.87  | 1.41E-02 | -7.03   | 15.75  | 6.56E-01 | -11.01 | 8.53  | 1.97E-01 | -0.30   | 13.19 | 9.82E-01 |
| cg11630989 | 21.40  | 9.15  | 1.93E-02 | 3.63   | 13.62 | 7.89E-01 | 22.85   | 11.05  | 3.87E-02 | 19.37  | 11.16 | 8.27E-02 | 72.22   | 27.36 | 8.29E-03 |
| cg00613752 | 14.53  | 6.21  | 1.93E-02 | 13.94  | 10.58 | 1.88E-01 | 29.02   | 15.05  | 5.37E-02 | 11.88  | 15.96 | 4.57E-01 | 8.95    | 10.76 | 4.06E-01 |
| cg08832054 | 18.59  | 7.94  | 1.93E-02 | 31.09  | 15.23 | 4.13E-02 | 15.18   | 16.45  | 3.56E-01 | 19.30  | 13.02 | 1.38E-01 | -4.86   | 22.71 | 8.30E-01 |
| cg26230651 | 10.84  | 4.63  | 1.93E-02 | 3.96   | 7.58  | 6.01E-01 | 18.13   | 9.28   | 5.09E-02 | 13.61  | 10.71 | 2.04E-01 | 12.10   | 10.63 | 2.55E-01 |
| cg18931108 | 48.10  | 20.56 | 1.93E-02 | 69.21  | 27.54 | 1.20E-02 | 13.39   | 65.77  | 8.39E-01 | 53.64  | 51.12 | 2.94E-01 | -2.39   | 47.99 | 9.60E-01 |
| cg00106499 | -36.07 | 15.42 | 1.93E-02 | -53.69 | 56.71 | 3.44E-01 | -137.49 | 206.20 | 5.05E-01 | -27.99 | 16.75 | 9.47E-02 | -104.17 | 57.02 | 6.77E-02 |
| cg12658374 | 10.99  | 4.70  | 1.93E-02 | 3.03   | 6.08  | 6.18E-01 | 17.19   | 9.70   | 7.62E-02 | 20.31  | 13.18 | 1.23E-01 | 19.98   | 11.30 | 7.69E-02 |
| cg00870514 | 9.18   | 3.92  | 1.93E-02 | 2.58   | 5.96  | 6.65E-01 | 17.22   | 8.21   | 3.60E-02 | 12.96  | 10.40 | 2.13E-01 | 11.65   | 8.86  | 1.88E-01 |
| cg10230257 | -19.31 | 8.25  | 1.93E-02 | -7.35  | 16.47 | 6.55E-01 | -11.98  | 23.88  | 6.16E-01 | -15.88 | 6.59  | 1.61E-02 | -55.69  | 20.36 | 6.23E-03 |
| cg08311656 | 14.94  | 6.39  | 1.93E-02 | 26.29  | 12.29 | 3.24E-02 | 17.80   | 17.20  | 3.01E-01 | 7.71   | 9.59  | 4.22E-01 | 13.25   | 16.57 | 4.24E-01 |
| cg23635130 | 14.77  | 6.31  | 1.93E-02 | 11.07  | 9.45  | 2.41E-01 | 20.39   | 11.46  | 7.52E-02 | 4.76   | 24.54 | 8.46E-01 | 18.11   | 14.75 | 2.19E-01 |
| cg15712559 | 15.21  | 6.50  | 1.93E-02 | 30.39  | 13.30 | 2.23E-02 | 9.94    | 16.34  | 5.43E-01 | 15.35  | 10.78 | 1.55E-01 | 3.31    | 13.29 | 8.03E-01 |
| cg24367568 | -53.00 | 22.66 | 1.93E-02 | -57.39 | 29.60 | 5.25E-02 | -49.18  | 83.52  | 5.56E-01 | 13.48  | 59.88 | 8.22E-01 | -89.56  | 50.98 | 7.90E-02 |
| cg24533864 | -18.40 | 7.87  | 1.93E-02 | -39.76 | 16.50 | 1.60E-02 | -16.02  | 19.57  | 4.13E-01 | -5.95  | 11.97 | 6.19E-01 | -23.49  | 18.59 | 2.06E-01 |
| cg07027305 | 8.73   | 3.73  | 1.93E-02 | 7.52   | 5.24  | 1.51E-01 | 12.84   | 7.71   | 9.58E-02 | 23.30  | 12.71 | 6.68E-02 | -0.58   | 8.99  | 9.49E-01 |
| cg03254137 | 9.68   | 4.14  | 1.93E-02 | 13.19  | 5.33  | 1.33E-02 | 13.13   | 12.35  | 2.88E-01 | 1.88   | 13.48 | 8.89E-01 | 0.39    | 9.49  | 9.68E-01 |
| cg02049682 | 13.52  | 5.78  | 1.93E-02 | 14.81  | 8.32  | 7.50E-02 | 22.41   | 11.61  | 5.36E-02 | 6.29   | 16.62 | 7.05E-01 | 0.35    | 15.03 | 9.82E-01 |
| cg19314992 | -9.36  | 4.00  | 1.93E-02 | -4.19  | 10.27 | 6.83E-01 | -4.06   | 13.13  | 7.57E-01 | -11.33 | 4.93  | 2.16E-02 | -9.16   | 12.86 | 4.76E-01 |
| cg25927687 | 24.39  | 10.43 | 1.93E-02 | 1.43   | 21.30 | 9.47E-01 | 51.46   | 25.06  | 4.00E-02 | 22.08  | 15.05 | 1.42E-01 | 42.48   | 31.94 | 1.84E-01 |

|            |        |       |          |        |       |          |         |        |          |        |       |          |        |       |          |
|------------|--------|-------|----------|--------|-------|----------|---------|--------|----------|--------|-------|----------|--------|-------|----------|
| cg24467291 | 21.85  | 9.34  | 1.93E-02 | 26.04  | 15.44 | 9.18E-02 | 30.08   | 29.80  | 3.13E-01 | 1.80   | 27.06 | 9.47E-01 | 21.98  | 14.48 | 1.29E-01 |
| cg21875336 | 38.45  | 16.44 | 1.94E-02 | 45.10  | 46.12 | 3.28E-01 | 70.52   | 156.81 | 6.53E-01 | 37.52  | 18.68 | 4.46E-02 | 32.94  | 55.56 | 5.53E-01 |
| cg02835003 | 24.81  | 10.61 | 1.94E-02 | 35.82  | 21.39 | 9.41E-02 | -2.53   | 46.95  | 9.57E-01 | 19.55  | 14.17 | 1.68E-01 | 36.31  | 28.12 | 1.97E-01 |
| cg18817318 | -9.40  | 4.02  | 1.94E-02 | -2.29  | 4.91  | 6.40E-01 | -14.12  | 8.63   | 1.02E-01 | -20.08 | 12.84 | 1.18E-01 | -14.64 | 7.08  | 3.86E-02 |
| cg12523691 | 17.08  | 7.30  | 1.94E-02 | 9.94   | 17.52 | 5.71E-01 | 2.98    | 34.47  | 9.31E-01 | 20.20  | 8.66  | 1.96E-02 | 12.05  | 27.70 | 6.64E-01 |
| cg05135158 | 20.87  | 8.93  | 1.94E-02 | 27.20  | 17.87 | 1.28E-01 | 15.74   | 15.37  | 3.06E-01 | 13.67  | 18.02 | 4.48E-01 | 32.30  | 21.77 | 1.38E-01 |
| cg06731611 | 22.85  | 9.77  | 1.94E-02 | 38.70  | 22.32 | 8.29E-02 | 11.30   | 46.52  | 8.08E-01 | 18.81  | 12.00 | 1.17E-01 | 24.36  | 30.77 | 4.29E-01 |
| cg15207826 | 17.15  | 7.34  | 1.94E-02 | 14.20  | 10.26 | 1.66E-01 | 27.44   | 18.52  | 1.39E-01 | 26.93  | 29.77 | 3.66E-01 | 14.58  | 14.08 | 3.00E-01 |
| cg09964575 | -36.84 | 15.76 | 1.94E-02 | -35.00 | 19.17 | 6.79E-02 | -9.88   | 65.25  | 8.80E-01 | 27.87  | 80.97 | 7.31E-01 | -59.93 | 32.98 | 6.92E-02 |
| cg26207357 | 22.05  | 9.43  | 1.94E-02 | 3.08   | 25.43 | 9.04E-01 | 15.09   | 25.25  | 5.50E-01 | 27.47  | 13.97 | 4.92E-02 | 26.19  | 18.24 | 1.51E-01 |
| cg04619859 | 31.45  | 13.45 | 1.94E-02 | 56.49  | 42.72 | 1.86E-01 | -182.54 | 191.53 | 3.41E-01 | 29.07  | 14.87 | 5.05E-02 | 38.27  | 48.51 | 4.30E-01 |
| cg19010223 | 7.18   | 3.07  | 1.94E-02 | 4.44   | 4.86  | 3.61E-01 | 5.71    | 5.90   | 3.33E-01 | 6.81   | 6.59  | 3.01E-01 | 21.04  | 9.13  | 2.12E-02 |
| cg17516106 | 52.51  | 22.46 | 1.94E-02 | 57.75  | 29.13 | 4.75E-02 | 65.81   | 55.34  | 2.34E-01 | -16.45 | 47.18 | 7.27E-01 | 107.06 | 51.13 | 3.63E-02 |
| cg02973171 | 12.92  | 5.53  | 1.94E-02 | 15.19  | 11.48 | 1.86E-01 | 3.71    | 14.45  | 7.97E-01 | 12.75  | 8.80  | 1.47E-01 | 16.84  | 11.60 | 1.47E-01 |
| cg04503340 | -15.34 | 6.56  | 1.94E-02 | -21.93 | 12.90 | 8.91E-02 | -4.03   | 15.81  | 7.99E-01 | -19.63 | 9.33  | 3.54E-02 | 9.87   | 24.05 | 6.82E-01 |
| cg15382497 | -20.04 | 8.57  | 1.94E-02 | -27.74 | 31.73 | 3.82E-01 | -100.01 | 158.67 | 5.29E-01 | -21.43 | 9.16  | 1.93E-02 | 21.20  | 38.80 | 5.85E-01 |
| cg14851114 | -13.93 | 5.96  | 1.94E-02 | -20.70 | 14.64 | 1.57E-01 | -5.48   | 30.38  | 8.57E-01 | -16.64 | 7.77  | 3.23E-02 | -2.44  | 13.07 | 8.52E-01 |
| cg17685004 | -7.56  | 3.23  | 1.94E-02 | -10.10 | 5.09  | 4.72E-02 | -13.39  | 11.33  | 2.37E-01 | -1.43  | 5.25  | 7.85E-01 | -13.72 | 8.81  | 1.20E-01 |
| cg02293228 | 18.33  | 7.84  | 1.94E-02 | 13.26  | 9.17  | 1.48E-01 | 17.89   | 33.97  | 5.98E-01 | 45.66  | 50.62 | 3.67E-01 | 34.29  | 17.88 | 5.51E-02 |
| cg22607760 | 12.63  | 5.40  | 1.94E-02 | 19.20  | 9.38  | 4.06E-02 | -3.73   | 17.92  | 8.35E-01 | 10.77  | 7.92  | 1.74E-01 | 14.15  | 16.15 | 3.81E-01 |
| cg23858605 | 20.70  | 8.85  | 1.94E-02 | 23.75  | 18.10 | 1.89E-01 | 31.28   | 18.85  | 9.69E-02 | 12.07  | 13.29 | 3.64E-01 | 28.57  | 28.50 | 3.16E-01 |
| cg08321684 | 14.35  | 6.14  | 1.94E-02 | 29.30  | 12.71 | 2.11E-02 | 21.56   | 14.31  | 1.32E-01 | 5.22   | 8.67  | 5.47E-01 | 11.47  | 21.66 | 5.96E-01 |
| cg11751213 | 9.13   | 3.90  | 1.94E-02 | 10.22  | 5.03  | 4.21E-02 | 13.59   | 10.27  | 1.86E-01 | 14.40  | 14.38 | 3.17E-01 | -0.33  | 9.22  | 9.71E-01 |
| cg07546878 | -13.70 | 5.86  | 1.94E-02 | -25.21 | 15.05 | 9.39E-02 | 20.19   | 36.71  | 5.82E-01 | -12.84 | 6.83  | 6.04E-02 | -10.85 | 19.73 | 5.83E-01 |
| cg14699728 | 11.07  | 4.73  | 1.94E-02 | 22.18  | 7.81  | 4.49E-03 | 6.79    | 9.76   | 4.87E-01 | 14.45  | 6.91  | 3.65E-02 | 1.29   | 6.65  | 8.46E-01 |
| cg09848445 | -47.59 | 20.36 | 1.94E-02 | -52.06 | 31.18 | 9.50E-02 | 205.71  | 158.57 | 1.95E-01 | -46.56 | 39.49 | 2.38E-01 | -56.32 | 37.72 | 1.35E-01 |
| cg07448997 | -9.65  | 4.13  | 1.94E-02 | -11.35 | 8.55  | 1.85E-01 | -7.94   | 15.74  | 6.14E-01 | -9.58  | 5.52  | 8.26E-02 | -7.91  | 11.04 | 4.74E-01 |
| cg20787665 | 24.96  | 10.68 | 1.94E-02 | 43.27  | 21.21 | 4.14E-02 | 32.99   | 21.45  | 1.24E-01 | 10.90  | 17.81 | 5.41E-01 | 13.68  | 28.63 | 6.33E-01 |
| cg20126656 | -10.41 | 4.46  | 1.94E-02 | -11.09 | 8.51  | 1.93E-01 | -25.93  | 12.88  | 4.42E-02 | -10.51 | 7.58  | 1.66E-01 | -2.48  | 8.72  | 7.76E-01 |
| cg04638679 | 22.19  | 9.49  | 1.94E-02 | 39.47  | 13.85 | 4.37E-03 | 10.24   | 26.68  | 7.01E-01 | -3.91  | 29.79 | 8.96E-01 | 10.19  | 16.77 | 5.43E-01 |
| cg10563131 | 19.64  | 8.40  | 1.94E-02 | 36.26  | 17.50 | 3.83E-02 | 3.37    | 17.08  | 8.43E-01 | 19.72  | 12.93 | 1.27E-01 | 20.35  | 25.96 | 4.33E-01 |
| cg25795774 | -9.82  | 4.20  | 1.94E-02 | -11.61 | 9.96  | 2.44E-01 | -41.77  | 22.58  | 6.43E-02 | -7.92  | 5.06  | 1.18E-01 | -8.65  | 13.42 | 5.19E-01 |
| cg18242288 | 6.22   | 2.66  | 1.94E-02 | 7.47   | 3.47  | 3.14E-02 | 6.21    | 7.37   | 4.00E-01 | -0.49  | 6.64  | 9.42E-01 | 9.02   | 7.62  | 2.36E-01 |
| cg19083779 | 14.10  | 6.03  | 1.94E-02 | 17.37  | 19.52 | 3.73E-01 | 89.55   | 80.88  | 2.68E-01 | 9.87   | 6.94  | 1.55E-01 | 31.38  | 15.97 | 4.94E-02 |
| cg17086139 | -13.15 | 5.63  | 1.94E-02 | -3.40  | 12.86 | 7.91E-01 | -6.29   | 14.94  | 6.74E-01 | -16.56 | 7.36  | 2.45E-02 | -23.35 | 19.51 | 2.31E-01 |

|            |        |       |          |        |       |          |         |        |          |        |       |          |        |       |          |
|------------|--------|-------|----------|--------|-------|----------|---------|--------|----------|--------|-------|----------|--------|-------|----------|
| cg20721135 | 13.20  | 5.65  | 1.94E-02 | 12.00  | 7.72  | 1.20E-01 | 14.49   | 14.77  | 3.27E-01 | 37.52  | 18.95 | 4.77E-02 | 5.77   | 11.80 | 6.25E-01 |
| cg22378614 | 24.44  | 10.46 | 1.94E-02 | 13.32  | 23.54 | 5.72E-01 | 72.28   | 70.75  | 3.07E-01 | 24.81  | 12.46 | 4.64E-02 | 36.19  | 37.95 | 3.40E-01 |
| cg19604323 | -10.45 | 4.47  | 1.94E-02 | -5.85  | 13.07 | 6.55E-01 | 9.87    | 19.15  | 6.06E-01 | -13.41 | 5.13  | 8.97E-03 | -1.74  | 17.01 | 9.18E-01 |
| cg14603406 | -27.90 | 11.94 | 1.94E-02 | -13.84 | 18.57 | 4.56E-01 | -71.96  | 32.13  | 2.51E-02 | -20.21 | 23.62 | 3.92E-01 | -36.63 | 27.16 | 1.77E-01 |
| cg13546173 | -32.73 | 14.01 | 1.94E-02 | -50.87 | 17.22 | 3.13E-03 | 9.89    | 33.32  | 7.67E-01 | -34.92 | 61.16 | 5.68E-01 | -13.35 | 32.13 | 6.78E-01 |
| cg04599652 | 44.24  | 18.93 | 1.94E-02 | 27.97  | 48.82 | 5.67E-01 | -302.78 | 258.73 | 2.42E-01 | 52.59  | 21.42 | 1.41E-02 | 9.26   | 75.24 | 9.02E-01 |
| cg23729777 | -10.07 | 4.31  | 1.94E-02 | -12.89 | 6.65  | 5.26E-02 | -7.84   | 8.98   | 3.83E-01 | -1.25  | 11.87 | 9.16E-01 | -12.29 | 9.20  | 1.82E-01 |
| cg10431340 | -10.57 | 4.52  | 1.95E-02 | -24.79 | 9.38  | 8.19E-03 | -10.21  | 21.31  | 6.32E-01 | -7.27  | 5.11  | 1.55E-01 | -1.21  | 13.70 | 9.29E-01 |
| cg15839219 | 16.27  | 6.96  | 1.95E-02 | 29.10  | 9.57  | 2.36E-03 | 1.21    | 15.87  | 9.39E-01 | 23.68  | 18.13 | 1.91E-01 | 6.57   | 10.33 | 5.24E-01 |
| cg06546469 | -9.39  | 4.02  | 1.95E-02 | -7.99  | 5.74  | 1.64E-01 | -11.29  | 9.79   | 2.49E-01 | -10.77 | 11.17 | 3.35E-01 | -10.25 | 8.70  | 2.39E-01 |
| cg23092777 | 20.77  | 8.89  | 1.95E-02 | 21.47  | 9.38  | 2.21E-02 | -54.54  | 101.12 | 5.90E-01 | 24.11  | 56.73 | 6.71E-01 | 18.95  | 33.83 | 5.75E-01 |
| cg00517202 | -6.68  | 2.86  | 1.95E-02 | -2.63  | 4.58  | 5.65E-01 | -4.99   | 7.22   | 4.90E-01 | -8.83  | 5.21  | 8.97E-02 | -14.52 | 7.33  | 4.76E-02 |
| cg13694662 | 12.75  | 5.46  | 1.95E-02 | 11.99  | 10.02 | 2.31E-01 | 27.33   | 15.77  | 8.30E-02 | 4.47   | 8.91  | 6.16E-01 | 20.41  | 11.98 | 8.84E-02 |
| cg02974456 | 23.43  | 10.03 | 1.95E-02 | 36.59  | 23.56 | 1.20E-01 | 21.04   | 19.68  | 2.85E-01 | 11.29  | 12.85 | 3.80E-01 | 69.15  | 31.86 | 3.00E-02 |
| cg17514199 | -15.85 | 6.78  | 1.95E-02 | -18.37 | 11.32 | 1.05E-01 | -25.88  | 22.58  | 2.52E-01 | -22.58 | 5.13  | 1.08E-05 | 6.28   | 12.30 | 6.10E-01 |
| cg26839871 | 28.66  | 12.27 | 1.95E-02 | 48.20  | 22.94 | 3.57E-02 | -7.25   | 44.05  | 8.69E-01 | 31.45  | 17.94 | 7.96E-02 | 4.40   | 29.83 | 8.83E-01 |
| cg10012079 | 38.22  | 16.36 | 1.95E-02 | 37.15  | 21.75 | 8.77E-02 | 23.24   | 38.80  | 5.49E-01 | 92.19  | 35.07 | 8.56E-03 | 6.74   | 30.89 | 8.27E-01 |
| cg06588782 | -9.79  | 4.19  | 1.95E-02 | -6.13  | 9.84  | 5.34E-01 | -5.74   | 15.27  | 7.07E-01 | -9.83  | 5.25  | 6.14E-02 | -18.70 | 12.83 | 1.45E-01 |
| cg23638252 | 18.94  | 8.10  | 1.95E-02 | 26.87  | 13.02 | 3.91E-02 | 13.24   | 24.15  | 5.84E-01 | 26.23  | 19.64 | 1.82E-01 | 7.80   | 14.11 | 5.81E-01 |
| cg13344886 | -13.34 | 5.71  | 1.95E-02 | -20.46 | 10.07 | 4.22E-02 | -4.27   | 14.38  | 7.67E-01 | -16.72 | 12.03 | 1.64E-01 | -7.86  | 10.50 | 4.54E-01 |
| cg21258596 | -21.06 | 9.02  | 1.95E-02 | -19.75 | 13.53 | 1.44E-01 | -22.25  | 24.22  | 3.58E-01 | -29.83 | 22.95 | 1.94E-01 | -17.50 | 17.58 | 3.20E-01 |
| cg22841258 | -19.39 | 8.30  | 1.95E-02 | 9.53   | 26.06 | 7.15E-01 | 48.48   | 100.34 | 6.29E-01 | -21.39 | 9.33  | 2.19E-02 | -37.49 | 26.17 | 1.52E-01 |
| cg15101392 | 11.79  | 5.05  | 1.95E-02 | 2.67   | 7.72  | 7.29E-01 | 31.56   | 12.81  | 1.38E-02 | 13.87  | 5.48  | 1.14E-02 | 5.95   | 11.81 | 6.14E-01 |
| cg22041712 | 13.89  | 5.94  | 1.95E-02 | 22.93  | 15.07 | 1.28E-01 | 38.47   | 20.10  | 5.56E-02 | 9.47   | 7.21  | 1.89E-01 | 6.68   | 21.39 | 7.55E-01 |
| cg18689454 | 6.98   | 2.99  | 1.95E-02 | 5.26   | 3.82  | 1.69E-01 | 3.76    | 7.90   | 6.35E-01 | 14.23  | 10.35 | 1.69E-01 | 12.59  | 7.42  | 8.97E-02 |
| cg14068146 | 104.01 | 44.52 | 1.95E-02 | 58.01  | 51.72 | 2.62E-01 | 397.39  | 161.51 | 1.39E-02 | 59.65  | 88.48 | 5.00E-01 | 120.57 | 55.89 | 3.10E-02 |
| cg00462560 | 18.10  | 7.75  | 1.95E-02 | 29.72  | 21.16 | 1.60E-01 | 25.48   | 24.02  | 2.89E-01 | 15.83  | 9.34  | 9.02E-02 | 7.79   | 28.44 | 7.84E-01 |
| cg00261690 | 5.75   | 2.46  | 1.95E-02 | 4.47   | 2.85  | 1.17E-01 | 12.84   | 5.81   | 2.72E-02 | 9.86   | 7.05  | 1.62E-01 | -1.83  | 6.93  | 7.91E-01 |
| cg02164225 | 34.58  | 14.81 | 1.95E-02 | 40.48  | 15.73 | 1.01E-02 | 5.35    | 28.27  | 8.50E-01 | 96.77  | 33.36 | 3.73E-03 | 17.86  | 15.65 | 2.54E-01 |
| cg19879330 | 18.70  | 8.01  | 1.95E-02 | 5.65   | 15.49 | 7.15E-01 | -4.62   | 31.15  | 8.82E-01 | 22.65  | 10.70 | 3.43E-02 | 45.10  | 24.50 | 6.56E-02 |
| cg14523602 | 34.96  | 14.97 | 1.95E-02 | 32.88  | 21.40 | 1.24E-01 | 50.19   | 54.71  | 3.59E-01 | 38.93  | 41.94 | 3.53E-01 | 32.94  | 26.95 | 2.22E-01 |
| cg20999167 | -12.77 | 5.47  | 1.95E-02 | -7.78  | 7.08  | 2.72E-01 | -22.28  | 13.78  | 1.06E-01 | -9.88  | 17.32 | 5.68E-01 | -24.89 | 14.31 | 8.19E-02 |
| cg21115727 | 16.24  | 6.95  | 1.95E-02 | 23.71  | 21.89 | 2.79E-01 | -11.48  | 27.07  | 6.72E-01 | 19.50  | 7.86  | 1.31E-02 | -12.89 | 30.81 | 6.76E-01 |
| cg00621646 | -8.48  | 3.63  | 1.95E-02 | -11.37 | 8.82  | 1.97E-01 | -1.76   | 14.57  | 9.04E-01 | -8.55  | 4.48  | 5.64E-02 | -7.40  | 10.84 | 4.95E-01 |
| cg09597192 | 17.94  | 7.68  | 1.95E-02 | -0.56  | 19.46 | 9.77E-01 | 50.85   | 23.86  | 3.31E-02 | 18.52  | 9.74  | 5.73E-02 | 10.48  | 22.24 | 6.37E-01 |

|            |        |       |          |        |       |          |         |        |          |         |       |          |        |       |          |
|------------|--------|-------|----------|--------|-------|----------|---------|--------|----------|---------|-------|----------|--------|-------|----------|
| cg23142799 | 11.53  | 4.94  | 1.95E-02 | 19.33  | 8.33  | 2.03E-02 | 21.54   | 13.26  | 1.04E-01 | 2.17    | 9.41  | 8.18E-01 | 4.95   | 10.18 | 6.27E-01 |
| cg08769634 | -14.04 | 6.01  | 1.95E-02 | -21.53 | 13.65 | 1.15E-01 | -19.39  | 30.99  | 5.32E-01 | -10.06  | 7.37  | 1.72E-01 | -23.71 | 18.72 | 2.05E-01 |
| cg10104336 | -11.74 | 5.03  | 1.95E-02 | -4.47  | 9.54  | 6.39E-01 | -10.01  | 10.92  | 3.59E-01 | -12.50  | 8.60  | 1.46E-01 | -24.32 | 12.24 | 4.69E-02 |
| cg12963656 | 7.09   | 3.04  | 1.95E-02 | 8.88   | 4.03  | 2.75E-02 | 6.26    | 7.38   | 3.96E-01 | 2.39    | 11.98 | 8.42E-01 | 4.20   | 6.81  | 5.37E-01 |
| cg05208812 | 40.43  | 17.31 | 1.95E-02 | 51.44  | 14.88 | 5.44E-04 | -7.64   | 47.66  | 8.73E-01 | 161.99  | 76.66 | 3.46E-02 | 24.87  | 20.37 | 2.22E-01 |
| cg05982686 | -13.67 | 5.85  | 1.95E-02 | -15.02 | 7.47  | 4.42E-02 | -18.43  | 16.85  | 2.74E-01 | -25.98  | 20.29 | 2.00E-01 | -0.29  | 13.73 | 9.83E-01 |
| cg24637364 | 14.01  | 6.00  | 1.95E-02 | 12.78  | 13.98 | 3.61E-01 | 10.14   | 19.36  | 6.01E-01 | 12.58   | 9.33  | 1.78E-01 | 17.92  | 10.85 | 9.86E-02 |
| cg12957265 | -9.36  | 4.01  | 1.95E-02 | -6.37  | 4.90  | 1.94E-01 | -1.58   | 9.97   | 8.74E-01 | -10.18  | 9.62  | 2.90E-01 | -23.06 | 8.87  | 9.36E-03 |
| cg24765446 | -9.53  | 4.08  | 1.95E-02 | -9.13  | 9.78  | 3.51E-01 | -30.25  | 19.85  | 1.27E-01 | -9.30   | 4.88  | 5.69E-02 | -1.97  | 13.93 | 8.87E-01 |
| cg16420199 | 14.97  | 6.41  | 1.96E-02 | 42.27  | 18.93 | 2.55E-02 | 8.37    | 25.64  | 7.44E-01 | 13.48   | 8.53  | 1.14E-01 | 7.68   | 12.65 | 5.44E-01 |
| cg09048186 | 24.95  | 10.69 | 1.96E-02 | 32.05  | 13.42 | 1.69E-02 | 6.27    | 55.23  | 9.10E-01 | 50.15   | 35.39 | 1.56E-01 | -0.73  | 21.93 | 9.73E-01 |
| cg16179507 | 10.17  | 4.36  | 1.96E-02 | 6.77   | 6.22  | 2.76E-01 | 9.25    | 10.17  | 3.63E-01 | 0.59    | 16.87 | 9.72E-01 | 19.74  | 8.56  | 2.12E-02 |
| cg14292368 | -8.62  | 3.69  | 1.96E-02 | -11.67 | 5.60  | 3.72E-02 | -1.67   | 8.28   | 8.40E-01 | -8.40   | 11.47 | 4.64E-01 | -8.93  | 7.21  | 2.16E-01 |
| cg23941527 | -9.03  | 3.87  | 1.96E-02 | -13.47 | 7.66  | 7.86E-02 | 1.21    | 10.16  | 9.06E-01 | -8.33   | 5.63  | 1.39E-01 | -14.43 | 10.86 | 1.84E-01 |
| cg23511285 | 6.67   | 2.86  | 1.96E-02 | 5.86   | 3.47  | 9.17E-02 | 12.43   | 7.33   | 9.01E-02 | 3.77    | 10.08 | 7.09E-01 | 5.65   | 9.43  | 5.49E-01 |
| cg17537073 | 3.20   | 1.37  | 1.96E-02 | 4.93   | 2.31  | 3.27E-02 | 4.93    | 2.88   | 8.67E-02 | 1.37    | 3.49  | 6.93E-01 | 0.49   | 2.66  | 8.55E-01 |
| cg19987768 | 15.28  | 6.55  | 1.96E-02 | 15.69  | 9.08  | 8.39E-02 | 8.24    | 16.82  | 6.24E-01 | 28.42   | 23.06 | 2.18E-01 | 14.46  | 13.15 | 2.71E-01 |
| cg08522428 | -34.85 | 14.93 | 1.96E-02 | -23.35 | 43.74 | 5.93E-01 | -56.18  | 153.39 | 7.14E-01 | -34.92  | 16.67 | 3.62E-02 | -50.08 | 55.88 | 3.70E-01 |
| cg14134703 | 18.18  | 7.79  | 1.96E-02 | 29.08  | 20.91 | 1.64E-01 | 36.87   | 25.15  | 1.43E-01 | 11.15   | 9.33  | 2.32E-01 | 41.81  | 29.89 | 1.62E-01 |
| cg14433070 | 12.22  | 5.24  | 1.96E-02 | 11.38  | 13.75 | 4.08E-01 | 2.03    | 17.65  | 9.08E-01 | 12.94   | 6.36  | 4.18E-02 | 18.18  | 17.55 | 3.00E-01 |
| cg04738877 | -13.00 | 5.57  | 1.96E-02 | -4.66  | 9.92  | 6.39E-01 | -15.23  | 13.89  | 2.73E-01 | -15.29  | 9.79  | 1.18E-01 | -20.58 | 12.41 | 9.74E-02 |
| cg27366891 | -51.82 | 22.20 | 1.96E-02 | -37.01 | 27.71 | 1.82E-01 | -58.25  | 116.28 | 6.16E-01 | -118.76 | 81.01 | 1.43E-01 | -69.07 | 44.74 | 1.23E-01 |
| cg20985486 | 31.48  | 13.49 | 1.96E-02 | 9.35   | 46.13 | 8.39E-01 | -208.03 | 206.08 | 3.13E-01 | 34.29   | 14.60 | 1.89E-02 | 40.70  | 56.62 | 4.72E-01 |
| cg05718255 | -9.33  | 4.00  | 1.96E-02 | -8.65  | 5.25  | 9.94E-02 | -17.77  | 9.66   | 6.58E-02 | -1.07   | 14.51 | 9.41E-01 | -6.88  | 9.63  | 4.75E-01 |
| cg23438868 | -15.11 | 6.48  | 1.96E-02 | -28.62 | 13.21 | 3.02E-02 | -16.43  | 33.41  | 6.23E-01 | -9.91   | 8.26  | 2.30E-01 | -14.20 | 19.81 | 4.74E-01 |
| cg02375585 | -12.88 | 5.52  | 1.96E-02 | -13.20 | 10.73 | 2.19E-01 | -14.07  | 12.25  | 2.51E-01 | -11.63  | 9.11  | 2.02E-01 | -13.68 | 13.54 | 3.12E-01 |
| cg18110104 | -12.17 | 5.21  | 1.96E-02 | -30.52 | 14.74 | 3.84E-02 | 0.65    | 27.69  | 9.81E-01 | -10.26  | 6.03  | 8.88E-02 | -7.64  | 17.22 | 6.57E-01 |
| cg03117556 | -17.01 | 7.29  | 1.96E-02 | -23.20 | 14.18 | 1.02E-01 | -52.52  | 23.23  | 2.37E-02 | -11.31  | 7.51  | 1.32E-01 | -2.59  | 23.24 | 9.11E-01 |
| cg11859489 | -12.97 | 5.56  | 1.96E-02 | -42.64 | 18.64 | 2.21E-02 | -3.78   | 23.58  | 8.73E-01 | -10.42  | 6.16  | 9.07E-02 | -11.68 | 27.20 | 6.68E-01 |
| cg17515760 | -15.10 | 6.47  | 1.96E-02 | -24.26 | 11.31 | 3.19E-02 | -14.61  | 16.16  | 3.66E-01 | -6.14   | 5.33  | 2.50E-01 | -34.80 | 16.54 | 3.54E-02 |
| cg17347253 | 7.93   | 3.40  | 1.96E-02 | 2.19   | 5.64  | 6.98E-01 | 14.78   | 7.27   | 4.21E-02 | 10.91   | 6.42  | 8.93E-02 | 6.12   | 9.10  | 5.01E-01 |
| cg00681462 | 14.64  | 6.27  | 1.96E-02 | 15.55  | 12.88 | 2.27E-01 | 22.38   | 23.83  | 3.48E-01 | 12.42   | 9.64  | 1.98E-01 | 15.34  | 12.08 | 2.04E-01 |
| cg01594662 | -5.78  | 2.48  | 1.96E-02 | -4.08  | 4.25  | 3.37E-01 | -1.99   | 5.78   | 7.31E-01 | -10.02  | 4.29  | 1.96E-02 | -4.83  | 6.55  | 4.60E-01 |
| cg02362506 | 31.58  | 13.54 | 1.96E-02 | 21.14  | 16.08 | 1.89E-01 | 47.22   | 108.70 | 6.64E-01 | 45.27   | 74.44 | 5.43E-01 | 59.12  | 27.44 | 3.12E-02 |
| cg23958948 | -46.98 | 20.14 | 1.96E-02 | -37.38 | 26.97 | 1.66E-01 | -122.40 | 60.36  | 4.26E-02 | -5.68   | 73.51 | 9.38E-01 | -47.21 | 39.76 | 2.35E-01 |

|            |        |       |          |         |       |          |         |        |          |         |       |          |        |       |          |
|------------|--------|-------|----------|---------|-------|----------|---------|--------|----------|---------|-------|----------|--------|-------|----------|
| cg07790727 | -18.35 | 7.87  | 1.96E-02 | -37.38  | 18.59 | 4.44E-02 | -13.37  | 29.77  | 6.53E-01 | -19.65  | 8.68  | 2.35E-02 | 15.03  | 23.11 | 5.15E-01 |
| cg10926083 | -18.26 | 7.82  | 1.96E-02 | -15.68  | 14.60 | 2.83E-01 | -5.42   | 18.95  | 7.75E-01 | -17.69  | 13.31 | 1.84E-01 | -34.15 | 17.64 | 5.28E-02 |
| cg15472784 | 21.40  | 9.17  | 1.96E-02 | -14.69  | 36.85 | 6.90E-01 | -3.36   | 114.88 | 9.77E-01 | 24.85   | 9.97  | 1.27E-02 | 15.25  | 31.32 | 6.26E-01 |
| cg24577160 | 11.77  | 5.04  | 1.96E-02 | 7.86    | 9.18  | 3.92E-01 | 24.82   | 11.65  | 3.32E-02 | 13.40   | 6.97  | 5.45E-02 | -9.83  | 16.44 | 5.50E-01 |
| cg08324090 | 4.78   | 2.05  | 1.96E-02 | 7.03    | 3.12  | 2.42E-02 | 8.61    | 4.85   | 7.58E-02 | 1.18    | 3.67  | 7.47E-01 | -2.05  | 7.35  | 7.81E-01 |
| cg21186966 | -12.31 | 5.28  | 1.96E-02 | -11.86  | 8.39  | 1.57E-01 | -2.35   | 12.28  | 8.48E-01 | -29.85  | 13.89 | 3.17E-02 | -10.44 | 10.05 | 2.98E-01 |
| cg09440493 | -21.38 | 9.16  | 1.96E-02 | -29.01  | 20.66 | 1.60E-01 | -53.43  | 48.09  | 2.67E-01 | -12.96  | 11.19 | 2.47E-01 | -51.97 | 29.39 | 7.70E-02 |
| cg18462898 | 5.96   | 2.55  | 1.97E-02 | 5.17    | 3.12  | 9.72E-02 | 6.17    | 6.59   | 3.49E-01 | 10.01   | 9.93  | 3.13E-01 | 7.92   | 7.57  | 2.95E-01 |
| cg00676925 | 14.28  | 6.12  | 1.97E-02 | 23.28   | 14.63 | 1.12E-01 | 23.93   | 19.27  | 2.14E-01 | 11.58   | 7.48  | 1.22E-01 | 0.74   | 26.09 | 9.77E-01 |
| cg01518225 | 4.66   | 2.00  | 1.97E-02 | 3.34    | 2.83  | 2.38E-01 | 8.83    | 4.43   | 4.62E-02 | -1.57   | 6.70  | 8.15E-01 | 6.44   | 4.39  | 1.42E-01 |
| cg12493761 | -10.23 | 4.39  | 1.97E-02 | -7.34   | 10.57 | 4.87E-01 | -3.32   | 11.30  | 7.69E-01 | -12.20  | 5.78  | 3.49E-02 | -14.26 | 13.76 | 3.00E-01 |
| cg07877987 | -15.85 | 6.80  | 1.97E-02 | -17.39  | 10.35 | 9.29E-02 | -5.07   | 15.53  | 7.44E-01 | -38.32  | 18.54 | 3.88E-02 | -9.20  | 13.79 | 5.05E-01 |
| cg14085203 | -41.09 | 17.61 | 1.97E-02 | -35.69  | 22.45 | 1.12E-01 | -33.34  | 49.96  | 5.05E-01 | -46.63  | 56.97 | 4.13E-01 | -63.95 | 43.46 | 1.41E-01 |
| cg05582310 | -8.49  | 3.64  | 1.97E-02 | -15.47  | 7.58  | 4.14E-02 | -6.09   | 10.85  | 5.74E-01 | -5.48   | 4.98  | 2.72E-01 | -10.60 | 10.30 | 3.03E-01 |
| cg05155595 | 8.16   | 3.50  | 1.97E-02 | 8.33    | 6.20  | 1.79E-01 | 7.12    | 9.48   | 4.53E-01 | 12.14   | 5.34  | 2.30E-02 | -5.64  | 10.21 | 5.80E-01 |
| cg20972416 | -46.10 | 19.77 | 1.97E-02 | -42.84  | 63.88 | 5.02E-01 | -3.97   | 272.67 | 9.88E-01 | -47.39  | 21.93 | 3.07E-02 | -40.13 | 67.26 | 5.51E-01 |
| cg24365417 | -9.29  | 3.98  | 1.97E-02 | -10.18  | 7.89  | 1.97E-01 | -11.39  | 8.72   | 1.92E-01 | -8.27   | 5.91  | 1.61E-01 | -6.81  | 13.91 | 6.25E-01 |
| cg26843807 | -6.80  | 2.91  | 1.97E-02 | -12.91  | 4.82  | 7.35E-03 | -0.16   | 6.28   | 9.80E-01 | -3.62   | 5.17  | 4.84E-01 | -8.34  | 7.32  | 2.55E-01 |
| cg14666113 | 15.92  | 6.83  | 1.97E-02 | 20.89   | 24.76 | 3.99E-01 | 20.28   | 37.37  | 5.87E-01 | 17.54   | 7.95  | 2.74E-02 | 4.75   | 17.44 | 7.85E-01 |
| cg01599904 | -40.80 | 17.49 | 1.97E-02 | -39.25  | 22.79 | 8.51E-02 | -58.84  | 57.99  | 3.10E-01 | -139.39 | 78.83 | 7.70E-02 | -20.18 | 33.61 | 5.48E-01 |
| cg10062617 | 8.82   | 3.78  | 1.97E-02 | 8.54    | 6.85  | 2.12E-01 | 12.38   | 17.04  | 4.68E-01 | 7.61    | 5.05  | 1.32E-01 | 15.61  | 12.88 | 2.26E-01 |
| cg15598442 | -65.74 | 28.19 | 1.97E-02 | -118.59 | 61.30 | 5.31E-02 | 222.58  | 270.89 | 4.11E-01 | -52.38  | 35.27 | 1.38E-01 | -69.20 | 75.61 | 3.60E-01 |
| cg00637687 | 13.75  | 5.90  | 1.97E-02 | 13.62   | 8.51  | 1.09E-01 | 21.80   | 14.87  | 1.43E-01 | 12.93   | 12.07 | 2.84E-01 | 5.62   | 16.74 | 7.37E-01 |
| cg11075878 | 18.98  | 8.14  | 1.97E-02 | 16.59   | 19.62 | 3.98E-01 | 44.88   | 70.30  | 5.23E-01 | 18.95   | 9.52  | 4.65E-02 | 20.05  | 28.21 | 4.77E-01 |
| cg27640064 | 9.98   | 4.28  | 1.97E-02 | 5.01    | 5.96  | 4.00E-01 | 23.33   | 10.20  | 2.21E-02 | 9.73    | 12.15 | 4.23E-01 | 11.35  | 10.01 | 2.57E-01 |
| cg10234841 | -35.02 | 15.02 | 1.97E-02 | -91.76  | 53.98 | 8.92E-02 | -216.05 | 241.28 | 3.71E-01 | -31.40  | 16.21 | 5.28E-02 | -2.28  | 60.94 | 9.70E-01 |
| cg02708704 | -21.55 | 9.24  | 1.97E-02 | -29.55  | 16.21 | 6.84E-02 | -8.43   | 39.32  | 8.30E-01 | -13.75  | 13.00 | 2.90E-01 | -39.76 | 27.38 | 1.47E-01 |
| cg27177415 | -30.54 | 13.10 | 1.97E-02 | -17.81  | 25.03 | 4.77E-01 | 3.42    | 88.99  | 9.69E-01 | -41.53  | 22.59 | 6.60E-02 | -31.97 | 21.59 | 1.39E-01 |
| cg19779379 | 24.50  | 10.51 | 1.97E-02 | 26.44   | 20.25 | 1.92E-01 | 16.47   | 20.90  | 4.31E-01 | 10.41   | 16.66 | 5.32E-01 | 63.52  | 25.30 | 1.20E-02 |
| cg27151677 | 13.02  | 5.58  | 1.97E-02 | 22.50   | 8.09  | 5.40E-03 | -0.78   | 10.22  | 9.39E-01 | 15.04   | 16.81 | 3.71E-01 | 11.16  | 11.93 | 3.50E-01 |
| cg14735741 | -10.70 | 4.59  | 1.97E-02 | -16.96  | 13.41 | 2.06E-01 | 8.84    | 25.33  | 7.27E-01 | -10.93  | 5.16  | 3.42E-02 | -6.08  | 18.69 | 7.45E-01 |
| cg00476608 | 6.55   | 2.81  | 1.97E-02 | 6.25    | 4.53  | 1.68E-01 | 15.51   | 7.01   | 2.69E-02 | 4.38    | 4.77  | 3.58E-01 | 1.29   | 8.52  | 8.80E-01 |
| cg03446502 | 19.17  | 8.22  | 1.97E-02 | 6.40    | 19.91 | 7.48E-01 | 40.67   | 18.63  | 2.90E-02 | 12.58   | 11.35 | 2.67E-01 | 32.54  | 24.93 | 1.92E-01 |
| cg20266104 | 22.83  | 9.79  | 1.97E-02 | 23.60   | 11.77 | 4.49E-02 | 23.08   | 42.80  | 5.90E-01 | 32.55   | 39.77 | 4.13E-01 | 16.99  | 22.21 | 4.44E-01 |
| cg10919177 | 16.57  | 7.11  | 1.97E-02 | 8.16    | 10.64 | 4.43E-01 | 21.28   | 17.16  | 2.15E-01 | 31.39   | 17.32 | 6.99E-02 | 18.67  | 15.38 | 2.25E-01 |



|            |        |       |          |        |       |          |         |        |          |        |       |          |        |       |          |
|------------|--------|-------|----------|--------|-------|----------|---------|--------|----------|--------|-------|----------|--------|-------|----------|
| cg26389330 | 8.58   | 3.68  | 1.97E-02 | 10.45  | 5.19  | 4.40E-02 | 6.38    | 8.76   | 4.67E-01 | 13.12  | 9.02  | 1.46E-01 | 0.12   | 9.34  | 9.90E-01 |
| cg15175194 | -27.17 | 11.66 | 1.98E-02 | 6.86   | 28.50 | 8.10E-01 | 75.59   | 98.37  | 4.42E-01 | -35.11 | 13.81 | 1.10E-02 | -41.08 | 35.66 | 2.49E-01 |
| cg11953015 | -10.54 | 4.52  | 1.98E-02 | -21.43 | 9.25  | 2.05E-02 | -4.33   | 12.96  | 7.38E-01 | -9.35  | 6.13  | 1.27E-01 | 2.04   | 14.63 | 8.89E-01 |
| cg10113414 | -10.29 | 4.42  | 1.98E-02 | -15.46 | 7.33  | 3.49E-02 | -2.55   | 8.96   | 7.76E-01 | 0.89   | 11.83 | 9.40E-01 | -16.44 | 8.75  | 6.03E-02 |
| cg19269530 | -11.31 | 4.85  | 1.98E-02 | -15.32 | 7.15  | 3.22E-02 | 10.26   | 13.44  | 4.45E-01 | -13.58 | 13.45 | 3.13E-01 | -13.73 | 9.19  | 1.35E-01 |
| cg22256309 | -12.97 | 5.56  | 1.98E-02 | -21.20 | 12.38 | 8.66E-02 | -7.73   | 13.86  | 5.77E-01 | -15.94 | 8.07  | 4.82E-02 | 0.87   | 13.84 | 9.50E-01 |
| cg24713499 | 21.79  | 9.35  | 1.98E-02 | 63.49  | 35.68 | 7.52E-02 | -13.35  | 116.73 | 9.09E-01 | 18.37  | 10.06 | 6.79E-02 | 26.84  | 37.58 | 4.75E-01 |
| cg14020129 | -25.35 | 10.88 | 1.98E-02 | -27.50 | 39.54 | 4.87E-01 | 24.91   | 163.03 | 8.79E-01 | -29.74 | 11.73 | 1.13E-02 | 35.76  | 44.12 | 4.18E-01 |
| cg00231405 | -40.72 | 17.47 | 1.98E-02 | -32.28 | 23.12 | 1.63E-01 | -40.68  | 56.36  | 4.70E-01 | 16.61  | 53.87 | 7.58E-01 | -88.47 | 36.64 | 1.58E-02 |
| cg23005797 | -18.30 | 7.85  | 1.98E-02 | -13.39 | 13.47 | 3.20E-01 | -2.96   | 40.93  | 9.42E-01 | -28.04 | 17.51 | 1.09E-01 | -18.95 | 12.08 | 1.17E-01 |
| cg15591386 | -9.02  | 3.87  | 1.98E-02 | -5.41  | 8.04  | 5.01E-01 | -1.85   | 10.95  | 8.66E-01 | -11.80 | 5.28  | 2.53E-02 | -11.27 | 11.93 | 3.45E-01 |
| cg08587864 | -10.12 | 4.34  | 1.98E-02 | -13.27 | 6.08  | 2.90E-02 | -12.34  | 10.99  | 2.62E-01 | -1.00  | 11.82 | 9.33E-01 | -6.48  | 9.77  | 5.08E-01 |
| cg10326833 | 17.23  | 7.39  | 1.98E-02 | 1.22   | 17.13 | 9.43E-01 | 21.60   | 16.48  | 1.90E-01 | 21.19  | 10.11 | 3.62E-02 | 17.07  | 26.42 | 5.18E-01 |
| cg26428889 | 33.64  | 14.44 | 1.98E-02 | 42.61  | 17.27 | 1.36E-02 | 50.77   | 52.20  | 3.31E-01 | -8.90  | 75.73 | 9.06E-01 | 1.60   | 33.28 | 9.62E-01 |
| cg25223055 | 20.86  | 8.95  | 1.98E-02 | 27.71  | 15.60 | 7.58E-02 | 11.48   | 15.58  | 4.61E-01 | 22.08  | 20.19 | 2.74E-01 | 25.07  | 23.60 | 2.88E-01 |
| cg23175215 | -35.00 | 15.02 | 1.98E-02 | -62.85 | 39.57 | 1.12E-01 | -154.28 | 227.05 | 4.97E-01 | -35.12 | 16.89 | 3.75E-02 | 42.03  | 61.30 | 4.93E-01 |
| cg21495385 | -22.64 | 9.72  | 1.98E-02 | -40.18 | 20.99 | 5.57E-02 | 1.18    | 42.69  | 9.78E-01 | -27.39 | 10.77 | 1.10E-02 | 13.10  | 24.86 | 5.98E-01 |
| cg00661970 | 14.87  | 6.38  | 1.98E-02 | 18.80  | 17.78 | 2.90E-01 | 35.51   | 39.54  | 3.69E-01 | 13.46  | 7.68  | 7.96E-02 | 14.42  | 16.25 | 3.75E-01 |
| cg11749010 | -6.84  | 2.93  | 1.98E-02 | -10.71 | 5.49  | 5.13E-02 | -5.13   | 5.23   | 3.27E-01 | 1.61   | 6.87  | 8.14E-01 | -11.32 | 6.29  | 7.20E-02 |
| cg25537434 | 16.88  | 7.24  | 1.98E-02 | 29.57  | 12.89 | 2.18E-02 | 15.58   | 16.96  | 3.58E-01 | 9.75   | 14.43 | 4.99E-01 | 8.98   | 14.49 | 5.35E-01 |
| cg03002136 | 27.03  | 11.60 | 1.98E-02 | 37.79  | 13.83 | 6.27E-03 | -44.65  | 64.09  | 4.86E-01 | 27.25  | 54.67 | 6.18E-01 | 3.04   | 24.82 | 9.02E-01 |
| cg21876925 | 10.98  | 4.71  | 1.98E-02 | 18.08  | 5.90  | 2.17E-03 | 9.38    | 10.85  | 3.87E-01 | 4.03   | 16.15 | 8.03E-01 | -0.99  | 9.34  | 9.16E-01 |
| cg00374672 | 9.76   | 4.19  | 1.98E-02 | 13.51  | 5.76  | 1.91E-02 | 15.13   | 10.48  | 1.49E-01 | 1.23   | 10.28 | 9.05E-01 | 0.05   | 10.94 | 9.96E-01 |
| cg20939320 | -10.43 | 4.48  | 1.98E-02 | 0.21   | 10.45 | 9.84E-01 | -9.58   | 14.08  | 4.96E-01 | -14.85 | 5.84  | 1.10E-02 | -6.03  | 12.56 | 6.31E-01 |
| cg07751039 | 22.48  | 9.65  | 1.98E-02 | 45.39  | 23.54 | 5.38E-02 | 19.79   | 29.12  | 4.97E-01 | 19.83  | 11.94 | 9.69E-02 | -3.75  | 36.62 | 9.18E-01 |
| cg07956247 | -19.10 | 8.20  | 1.98E-02 | -16.95 | 12.51 | 1.75E-01 | -9.00   | 20.35  | 6.58E-01 | -46.88 | 19.90 | 1.85E-02 | -10.09 | 16.80 | 5.48E-01 |
| cg23341612 | 12.19  | 5.23  | 1.98E-02 | 13.01  | 12.36 | 2.93E-01 | -6.04   | 17.52  | 7.30E-01 | 13.02  | 6.48  | 4.44E-02 | 23.85  | 18.52 | 1.98E-01 |
| cg10040748 | 12.81  | 5.50  | 1.98E-02 | 13.24  | 8.11  | 1.03E-01 | 10.95   | 13.42  | 4.15E-01 | 19.80  | 15.34 | 1.97E-01 | 9.60   | 11.13 | 3.88E-01 |
| cg03218303 | 32.73  | 14.05 | 1.98E-02 | 48.06  | 46.63 | 3.03E-01 | 204.47  | 175.13 | 2.43E-01 | 33.84  | 15.27 | 2.67E-02 | -28.37 | 59.23 | 6.32E-01 |
| cg19324978 | -33.94 | 14.57 | 1.98E-02 | -22.29 | 20.01 | 2.65E-01 | -45.75  | 83.91  | 5.86E-01 | -49.29 | 35.01 | 1.59E-01 | -45.82 | 28.23 | 1.05E-01 |
| cg11350278 | -20.46 | 8.78  | 1.98E-02 | -15.74 | 18.91 | 4.05E-01 | 7.76    | 50.63  | 8.78E-01 | -23.72 | 10.59 | 2.51E-02 | -14.84 | 33.85 | 6.61E-01 |
| cg25720825 | -13.16 | 5.65  | 1.98E-02 | -21.13 | 7.98  | 8.07E-03 | -1.03   | 11.40  | 9.28E-01 | -22.03 | 10.51 | 3.60E-02 | -2.32  | 10.85 | 8.30E-01 |
| cg19267163 | -9.70  | 4.16  | 1.98E-02 | -5.59  | 10.40 | 5.91E-01 | -5.38   | 17.79  | 7.62E-01 | -8.87  | 5.00  | 7.62E-02 | -25.40 | 13.63 | 6.24E-02 |
| cg07042532 | -12.53 | 5.38  | 1.98E-02 | -19.73 | 15.20 | 1.94E-01 | -5.63   | 18.60  | 7.62E-01 | -11.84 | 6.30  | 6.03E-02 | -15.39 | 21.49 | 4.74E-01 |
| cg16640008 | -16.83 | 7.23  | 1.98E-02 | -16.07 | 11.52 | 1.63E-01 | -25.93  | 21.75  | 2.33E-01 | -13.77 | 15.22 | 3.65E-01 | -16.79 | 13.90 | 2.27E-01 |

|            |        |       |          |        |       |          |         |        |          |        |       |          |        |       |          |
|------------|--------|-------|----------|--------|-------|----------|---------|--------|----------|--------|-------|----------|--------|-------|----------|
| cg00268744 | 21.13  | 9.07  | 1.98E-02 | 15.70  | 15.26 | 3.03E-01 | 6.97    | 18.59  | 7.08E-01 | 29.50  | 19.04 | 1.21E-01 | 39.77  | 21.28 | 6.16E-02 |
| cg20614854 | -12.03 | 5.16  | 1.98E-02 | -15.28 | 7.90  | 5.31E-02 | -10.75  | 11.10  | 3.33E-01 | -3.28  | 16.01 | 8.38E-01 | -11.23 | 10.29 | 2.75E-01 |
| cg13136716 | 11.76  | 5.05  | 1.98E-02 | 5.18   | 9.47  | 5.85E-01 | 5.18    | 16.50  | 7.53E-01 | 14.87  | 7.09  | 3.60E-02 | 19.67  | 14.88 | 1.86E-01 |
| cg12819931 | 10.69  | 4.59  | 1.98E-02 | 1.45   | 10.54 | 8.91E-01 | -9.24   | 21.54  | 6.68E-01 | 13.79  | 5.42  | 1.10E-02 | 19.41  | 20.59 | 3.46E-01 |
| cg18025409 | -7.12  | 3.06  | 1.99E-02 | -6.45  | 4.15  | 1.20E-01 | -10.45  | 6.03   | 8.28E-02 | -12.98 | 16.65 | 4.36E-01 | -2.96  | 7.51  | 6.93E-01 |
| cg09703136 | -9.08  | 3.90  | 1.99E-02 | -16.14 | 9.05  | 7.43E-02 | -10.26  | 12.86  | 4.25E-01 | -5.81  | 5.01  | 2.46E-01 | -13.71 | 11.31 | 2.25E-01 |
| cg08166588 | 9.48   | 4.07  | 1.99E-02 | 6.63   | 5.76  | 2.50E-01 | 11.64   | 6.86   | 8.96E-02 | 19.50  | 7.31  | 7.66E-03 | -2.64  | 9.19  | 7.74E-01 |
| cg06620993 | 9.29   | 3.99  | 1.99E-02 | 13.54  | 5.76  | 1.87E-02 | 10.01   | 9.51   | 2.93E-01 | -3.65  | 11.58 | 7.52E-01 | 6.49   | 8.39  | 4.39E-01 |
| cg26051060 | -52.21 | 22.42 | 1.99E-02 | -50.72 | 27.36 | 6.38E-02 | -211.26 | 95.08  | 2.63E-02 | -46.43 | 66.61 | 4.86E-01 | -26.69 | 40.17 | 5.06E-01 |
| cg16336436 | -16.88 | 7.25  | 1.99E-02 | -1.42  | 16.10 | 9.30E-01 | 6.09    | 32.22  | 8.50E-01 | -23.86 | 8.93  | 7.56E-03 | -13.47 | 24.34 | 5.80E-01 |
| cg07687029 | 18.85  | 8.09  | 1.99E-02 | 21.16  | 15.20 | 1.64E-01 | 33.51   | 32.80  | 3.07E-01 | 13.83  | 11.09 | 2.12E-01 | 27.95  | 23.04 | 2.25E-01 |
| cg07007382 | 4.47   | 1.92  | 1.99E-02 | 4.15   | 2.51  | 9.86E-02 | 4.43    | 4.11   | 2.80E-01 | -1.06  | 9.42  | 9.10E-01 | 7.14   | 4.83  | 1.39E-01 |
| cg10233454 | 7.24   | 3.11  | 1.99E-02 | 5.20   | 3.98  | 1.92E-01 | 17.12   | 7.96   | 3.16E-02 | 6.44   | 9.17  | 4.83E-01 | 5.87   | 8.87  | 5.08E-01 |
| cg02636234 | 42.30  | 18.16 | 1.99E-02 | 47.88  | 24.20 | 4.79E-02 | 0.89    | 100.80 | 9.93E-01 | 23.12  | 42.37 | 5.85E-01 | 50.12  | 38.69 | 1.95E-01 |
| cg27477419 | 26.14  | 11.23 | 1.99E-02 | 46.13  | 13.43 | 5.94E-04 | 24.92   | 26.81  | 3.53E-01 | 29.96  | 16.44 | 6.84E-02 | -1.12  | 16.14 | 9.45E-01 |
| cg13641920 | 11.42  | 4.90  | 1.99E-02 | 21.06  | 7.71  | 6.28E-03 | 7.00    | 12.28  | 5.69E-01 | 4.34   | 13.71 | 7.52E-01 | 3.97   | 8.84  | 6.53E-01 |
| cg15945754 | -15.07 | 6.47  | 1.99E-02 | -21.19 | 10.58 | 4.52E-02 | -16.07  | 27.63  | 5.61E-01 | -12.24 | 10.92 | 2.62E-01 | -8.93  | 13.79 | 5.17E-01 |
| cg11435872 | 11.59  | 4.98  | 1.99E-02 | 3.38   | 7.71  | 6.61E-01 | 19.87   | 9.16   | 3.01E-02 | 11.86  | 15.78 | 4.52E-01 | 16.59  | 11.44 | 1.47E-01 |
| cg17450307 | 19.34  | 8.30  | 1.99E-02 | 45.91  | 27.79 | 9.86E-02 | 143.90  | 111.72 | 1.98E-01 | 16.38  | 8.99  | 6.83E-02 | 8.83   | 36.72 | 8.10E-01 |
| cg13378781 | -43.73 | 18.78 | 1.99E-02 | -38.13 | 28.82 | 1.86E-01 | 26.76   | 75.22  | 7.22E-01 | -84.01 | 39.06 | 3.15E-02 | -34.72 | 35.36 | 3.26E-01 |
| cg13441891 | 9.89   | 4.25  | 1.99E-02 | 13.56  | 5.53  | 1.42E-02 | 18.23   | 9.41   | 5.26E-02 | 5.94   | 8.52  | 4.86E-01 | -4.68  | 10.23 | 6.47E-01 |
| cg03238899 | -12.58 | 5.40  | 1.99E-02 | -11.60 | 12.03 | 3.35E-01 | -29.33  | 20.19  | 1.46E-01 | -12.78 | 6.76  | 5.86E-02 | 0.29   | 18.22 | 9.87E-01 |
| cg16677191 | 10.61  | 4.56  | 1.99E-02 | 9.95   | 5.37  | 6.39E-02 | 16.77   | 13.56  | 2.16E-01 | 15.35  | 20.01 | 4.43E-01 | 6.57   | 13.45 | 6.25E-01 |
| cg13944838 | -2.10  | 0.90  | 1.99E-02 | -2.78  | 1.21  | 2.14E-02 | -0.56   | 2.05   | 7.84E-01 | -6.10  | 3.48  | 8.00E-02 | -0.21  | 2.10  | 9.20E-01 |
| cg21739009 | 26.12  | 11.22 | 1.99E-02 | 30.28  | 12.69 | 1.71E-02 | 33.11   | 63.20  | 6.00E-01 | -88.16 | 77.59 | 2.56E-01 | 19.67  | 27.51 | 4.75E-01 |
| cg24401310 | 13.67  | 5.87  | 1.99E-02 | 0.56   | 18.95 | 9.76E-01 | 26.66   | 46.03  | 5.63E-01 | 14.42  | 6.52  | 2.69E-02 | 19.34  | 21.23 | 3.62E-01 |
| cg13042250 | 19.17  | 8.24  | 1.99E-02 | 35.55  | 20.94 | 8.95E-02 | 9.04    | 36.11  | 8.02E-01 | 19.42  | 9.73  | 4.59E-02 | -9.23  | 29.72 | 7.56E-01 |
| cg06198451 | -25.12 | 10.79 | 1.99E-02 | -47.45 | 55.19 | 3.90E-01 | -168.56 | 222.81 | 4.49E-01 | -20.82 | 11.24 | 6.39E-02 | -98.06 | 55.39 | 7.67E-02 |
| cg00368356 | 18.42  | 7.91  | 1.99E-02 | 18.07  | 18.98 | 3.41E-01 | 8.41    | 18.73  | 6.54E-01 | 18.06  | 10.38 | 8.18E-02 | 49.42  | 30.70 | 1.07E-01 |
| cg16478012 | -58.86 | 25.28 | 1.99E-02 | -90.89 | 72.42 | 2.09E-01 | -315.33 | 304.74 | 3.01E-01 | -46.71 | 29.39 | 1.12E-01 | -84.22 | 69.83 | 2.28E-01 |
| cg26829451 | 16.92  | 7.27  | 1.99E-02 | 44.08  | 26.47 | 9.58E-02 | 66.87   | 88.28  | 4.49E-01 | 14.22  | 7.85  | 7.01E-02 | 15.76  | 29.53 | 5.94E-01 |
| cg08697251 | -8.27  | 3.55  | 1.99E-02 | -12.85 | 5.39  | 1.72E-02 | -4.01   | 8.37   | 6.32E-01 | 0.10   | 10.53 | 9.92E-01 | -7.29  | 6.81  | 2.85E-01 |
| cg21566771 | 10.20  | 4.38  | 1.99E-02 | 3.33   | 6.03  | 5.81E-01 | 20.27   | 9.67   | 3.60E-02 | 15.71  | 13.32 | 2.38E-01 | 16.26  | 11.01 | 1.40E-01 |
| cg12693436 | -15.24 | 6.55  | 1.99E-02 | -17.22 | 10.10 | 8.82E-02 | -23.76  | 14.96  | 1.12E-01 | 0.32   | 16.15 | 9.84E-01 | -15.65 | 13.83 | 2.58E-01 |
| cg22369786 | -11.33 | 4.87  | 1.99E-02 | -9.97  | 6.42  | 1.21E-01 | -10.29  | 20.51  | 6.16E-01 | -33.16 | 15.60 | 3.36E-02 | -6.62  | 9.35  | 4.79E-01 |

|            |        |       |          |        |       |          |        |        |          |        |       |          |        |       |          |
|------------|--------|-------|----------|--------|-------|----------|--------|--------|----------|--------|-------|----------|--------|-------|----------|
| cg17522907 | 16.30  | 7.00  | 1.99E-02 | 46.25  | 19.79 | 1.94E-02 | 13.58  | 86.99  | 8.76E-01 | 11.41  | 7.83  | 1.45E-01 | 18.88  | 26.68 | 4.79E-01 |
| cg11428189 | -24.90 | 10.70 | 1.99E-02 | -34.54 | 15.31 | 2.41E-02 | 2.90   | 26.54  | 9.13E-01 | -17.27 | 31.31 | 5.81E-01 | -27.94 | 22.19 | 2.08E-01 |
| cg08239899 | -19.45 | 8.36  | 1.99E-02 | -37.71 | 14.02 | 7.16E-03 | -7.53  | 15.79  | 6.34E-01 | -21.91 | 14.11 | 1.21E-01 | 2.30   | 20.55 | 9.11E-01 |
| cg15879316 | 36.24  | 15.57 | 1.99E-02 | 31.72  | 19.60 | 1.05E-01 | 82.67  | 63.33  | 1.92E-01 | 47.65  | 45.34 | 2.93E-01 | 29.41  | 35.69 | 4.10E-01 |
| cg25247558 | -6.07  | 2.61  | 1.99E-02 | -6.06  | 3.51  | 8.44E-02 | -8.25  | 6.22   | 1.85E-01 | -2.81  | 8.41  | 7.38E-01 | -5.74  | 6.24  | 3.58E-01 |
| cg19169976 | 13.42  | 5.77  | 1.99E-02 | 9.32   | 9.89  | 3.46E-01 | 7.63   | 23.11  | 7.41E-01 | 17.51  | 8.32  | 3.52E-02 | 11.61  | 16.86 | 4.91E-01 |
| cg19701531 | 15.34  | 6.59  | 1.99E-02 | 18.79  | 10.82 | 8.25E-02 | 14.58  | 13.37  | 2.76E-01 | 0.14   | 14.25 | 9.92E-01 | 27.88  | 15.89 | 7.93E-02 |
| cg14997413 | 12.32  | 5.29  | 2.00E-02 | 20.37  | 9.92  | 4.00E-02 | 0.12   | 12.65  | 9.93E-01 | 15.47  | 10.14 | 1.27E-01 | 8.52   | 10.22 | 4.05E-01 |
| cg03642503 | -16.25 | 6.98  | 2.00E-02 | -24.82 | 11.62 | 3.27E-02 | 0.50   | 13.80  | 9.71E-01 | -15.03 | 17.30 | 3.85E-01 | -22.61 | 14.90 | 1.29E-01 |
| cg01782066 | -7.86  | 3.38  | 2.00E-02 | -11.36 | 5.28  | 3.14E-02 | 1.13   | 7.43   | 8.79E-01 | -13.37 | 9.40  | 1.55E-01 | -6.74  | 6.70  | 3.15E-01 |
| cg10801328 | 9.86   | 4.24  | 2.00E-02 | 11.62  | 8.32  | 1.63E-01 | 4.25   | 10.11  | 6.74E-01 | 15.60  | 7.30  | 3.25E-02 | 3.69   | 8.87  | 6.78E-01 |
| cg15823954 | 20.06  | 8.62  | 2.00E-02 | 6.66   | 19.62 | 7.34E-01 | 31.58  | 34.15  | 3.55E-01 | 17.68  | 10.74 | 9.98E-02 | 54.17  | 27.36 | 4.77E-02 |
| cg19942213 | -14.34 | 6.16  | 2.00E-02 | -25.03 | 13.51 | 6.39E-02 | -23.47 | 30.39  | 4.40E-01 | -10.67 | 7.70  | 1.66E-01 | -12.08 | 18.53 | 5.14E-01 |
| cg15208267 | -12.58 | 5.41  | 2.00E-02 | -26.74 | 10.10 | 8.13E-03 | -17.74 | 16.98  | 2.96E-01 | -8.70  | 6.54  | 1.83E-01 | 0.52   | 13.00 | 9.68E-01 |
| cg13393433 | 10.48  | 4.51  | 2.00E-02 | 12.30  | 6.40  | 5.44E-02 | 12.56  | 11.89  | 2.91E-01 | 15.79  | 14.93 | 2.90E-01 | 4.22   | 8.69  | 6.27E-01 |
| cg14158558 | -22.35 | 9.61  | 2.00E-02 | -51.56 | 15.22 | 7.07E-04 | 0.64   | 21.61  | 9.76E-01 | -17.47 | 7.15  | 1.46E-02 | -15.06 | 18.29 | 4.10E-01 |
| cg09936933 | 16.95  | 7.29  | 2.00E-02 | 17.41  | 10.00 | 8.18E-02 | 17.03  | 16.38  | 2.98E-01 | 25.04  | 22.84 | 2.73E-01 | 10.59  | 17.68 | 5.49E-01 |
| cg06285439 | -13.29 | 5.71  | 2.00E-02 | -17.13 | 11.08 | 1.22E-01 | -0.50  | 15.27  | 9.74E-01 | -13.65 | 8.69  | 1.16E-01 | -17.11 | 14.21 | 2.29E-01 |
| cg00925229 | -39.24 | 16.87 | 2.00E-02 | -48.64 | 23.37 | 3.74E-02 | -80.93 | 53.89  | 1.33E-01 | -0.11  | 46.94 | 9.98E-01 | -23.65 | 33.61 | 4.82E-01 |
| cg26140802 | -7.96  | 3.42  | 2.00E-02 | -11.23 | 4.80  | 1.94E-02 | -10.09 | 8.43   | 2.31E-01 | -7.42  | 10.71 | 4.88E-01 | 0.69   | 7.20  | 9.24E-01 |
| cg01377119 | -37.80 | 16.25 | 2.00E-02 | -35.43 | 18.82 | 5.98E-02 | -56.66 | 53.73  | 2.92E-01 | -32.41 | 75.42 | 6.67E-01 | -40.29 | 47.49 | 3.96E-01 |
| cg06304097 | 12.11  | 5.20  | 2.00E-02 | 41.87  | 18.84 | 2.62E-02 | 6.31   | 17.75  | 7.22E-01 | 11.73  | 6.96  | 9.21E-02 | 6.51   | 9.85  | 5.09E-01 |
| cg20736997 | 37.82  | 16.26 | 2.00E-02 | 43.31  | 22.62 | 5.55E-02 | 80.76  | 102.26 | 4.30E-01 | 98.37  | 58.20 | 9.10E-02 | 15.07  | 26.37 | 5.68E-01 |
| cg22517552 | 29.87  | 12.84 | 2.00E-02 | 49.48  | 37.20 | 1.83E-01 | -63.87 | 133.10 | 6.31E-01 | 26.12  | 14.68 | 7.51E-02 | 43.13  | 39.42 | 2.74E-01 |
| cg26446674 | -13.24 | 5.69  | 2.00E-02 | -20.22 | 13.12 | 1.23E-01 | -12.75 | 30.70  | 6.78E-01 | -10.79 | 6.82  | 1.13E-01 | -18.25 | 19.99 | 3.61E-01 |
| cg23010538 | 8.92   | 3.84  | 2.00E-02 | 9.64   | 14.00 | 4.91E-01 | 21.53  | 36.93  | 5.60E-01 | 10.45  | 4.21  | 1.32E-02 | -7.97  | 13.08 | 5.42E-01 |
| cg01819405 | 22.39  | 9.63  | 2.00E-02 | 16.49  | 20.42 | 4.19E-01 | 27.89  | 20.80  | 1.80E-01 | 18.24  | 14.53 | 2.09E-01 | 38.12  | 27.28 | 1.62E-01 |
| cg01054402 | 9.75   | 4.19  | 2.00E-02 | 9.97   | 5.23  | 5.68E-02 | 17.21  | 10.56  | 1.03E-01 | -12.27 | 17.30 | 4.78E-01 | 9.61   | 11.16 | 3.89E-01 |
| cg12210293 | 33.52  | 14.41 | 2.00E-02 | 29.68  | 20.18 | 1.41E-01 | 39.89  | 47.28  | 3.99E-01 | 57.41  | 59.63 | 3.36E-01 | 33.45  | 24.77 | 1.77E-01 |
| cg11549953 | 60.10  | 25.84 | 2.00E-02 | 21.38  | 62.11 | 7.31E-01 | -74.68 | 270.19 | 7.82E-01 | 88.07  | 31.15 | 4.70E-03 | -26.87 | 71.66 | 7.08E-01 |
| cg01919011 | -31.86 | 13.70 | 2.00E-02 | -46.73 | 22.71 | 3.96E-02 | 79.58  | 82.02  | 3.32E-01 | -37.13 | 22.14 | 9.35E-02 | -12.72 | 28.84 | 6.59E-01 |
| cg03667862 | 18.32  | 7.88  | 2.00E-02 | 13.90  | 19.83 | 4.83E-01 | 97.62  | 103.76 | 3.47E-01 | 17.56  | 8.91  | 4.89E-02 | 33.31  | 33.35 | 3.18E-01 |
| cg16165575 | -14.21 | 6.11  | 2.00E-02 | -17.04 | 8.04  | 3.40E-02 | -10.00 | 13.37  | 4.54E-01 | -34.76 | 34.50 | 3.14E-01 | -6.50  | 14.33 | 6.50E-01 |
| cg04540882 | 13.78  | 5.92  | 2.00E-02 | 14.95  | 8.03  | 6.28E-02 | 12.62  | 12.71  | 3.21E-01 | 13.98  | 19.59 | 4.75E-01 | 11.05  | 15.45 | 4.74E-01 |
| cg00435834 | -8.56  | 3.68  | 2.00E-02 | -9.71  | 8.08  | 2.30E-01 | -8.92  | 12.45  | 4.73E-01 | -9.46  | 4.75  | 4.66E-02 | -0.84  | 11.41 | 9.41E-01 |

|            |        |       |          |        |       |          |         |        |          |        |       |          |        |       |          |
|------------|--------|-------|----------|--------|-------|----------|---------|--------|----------|--------|-------|----------|--------|-------|----------|
| cg13169863 | -17.17 | 7.38  | 2.00E-02 | -32.61 | 12.00 | 6.57E-03 | -37.85  | 33.47  | 2.58E-01 | -8.01  | 5.78  | 1.66E-01 | -18.74 | 19.85 | 3.45E-01 |
| cg12659494 | 30.55  | 13.14 | 2.00E-02 | 41.60  | 19.00 | 2.85E-02 | -25.45  | 38.12  | 5.04E-01 | 34.12  | 34.44 | 3.22E-01 | 33.84  | 25.88 | 1.91E-01 |
| cg19825277 | -9.87  | 4.24  | 2.00E-02 | -22.30 | 11.69 | 5.65E-02 | -17.91  | 21.74  | 4.10E-01 | -7.36  | 4.91  | 1.33E-01 | -8.99  | 14.75 | 5.42E-01 |
| cg13563869 | -12.97 | 5.58  | 2.01E-02 | -14.26 | 12.12 | 2.39E-01 | 4.42    | 14.63  | 7.62E-01 | -12.66 | 7.84  | 1.06E-01 | -30.46 | 15.03 | 4.27E-02 |
| cg03142837 | 19.61  | 8.43  | 2.01E-02 | 2.66   | 18.53 | 8.86E-01 | 32.01   | 43.17  | 4.58E-01 | 20.42  | 10.52 | 5.24E-02 | 41.91  | 25.10 | 9.50E-02 |
| cg03885664 | -7.10  | 3.05  | 2.01E-02 | -8.22  | 4.25  | 5.33E-02 | -2.59   | 7.33   | 7.24E-01 | -9.63  | 8.59  | 2.63E-01 | -6.48  | 7.10  | 3.61E-01 |
| cg17871621 | 6.51   | 2.80  | 2.01E-02 | 8.86   | 4.24  | 3.65E-02 | 0.41    | 6.09   | 9.46E-01 | 14.73  | 9.13  | 1.06E-01 | 4.53   | 5.52  | 4.11E-01 |
| cg06174407 | 9.68   | 4.16  | 2.01E-02 | 8.77   | 5.69  | 1.23E-01 | 18.01   | 10.23  | 7.84E-02 | 8.42   | 11.32 | 4.57E-01 | 5.29   | 10.29 | 6.07E-01 |
| cg20960405 | 7.24   | 3.11  | 2.01E-02 | 2.30   | 6.11  | 7.07E-01 | 4.42    | 6.01   | 4.62E-01 | 11.99  | 5.59  | 3.21E-02 | 10.73  | 7.73  | 1.65E-01 |
| cg18563680 | 21.00  | 9.03  | 2.01E-02 | 30.76  | 25.68 | 2.31E-01 | 1.83    | 89.48  | 9.84E-01 | 18.98  | 10.10 | 6.02E-02 | 29.91  | 34.94 | 3.92E-01 |
| cg06493963 | -9.72  | 4.18  | 2.01E-02 | -18.93 | 9.32  | 4.22E-02 | -6.85   | 19.33  | 7.23E-01 | -7.78  | 5.25  | 1.39E-01 | -5.57  | 12.15 | 6.46E-01 |
| cg11033835 | 10.68  | 4.59  | 2.01E-02 | 18.40  | 18.74 | 3.26E-01 | 26.26   | 37.19  | 4.80E-01 | 10.84  | 5.08  | 3.27E-02 | 2.85   | 14.05 | 8.39E-01 |
| cg09290175 | 15.35  | 6.60  | 2.01E-02 | 37.24  | 19.85 | 6.06E-02 | 20.19   | 33.56  | 5.47E-01 | 12.03  | 7.36  | 1.02E-01 | 16.75  | 30.77 | 5.86E-01 |
| cg18492799 | 16.11  | 6.93  | 2.01E-02 | 1.10   | 16.79 | 9.48E-01 | -9.88   | 28.90  | 7.32E-01 | 20.97  | 8.20  | 1.05E-02 | 26.17  | 28.92 | 3.65E-01 |
| cg09780964 | 9.12   | 3.92  | 2.01E-02 | 9.21   | 4.97  | 6.39E-02 | 16.23   | 12.27  | 1.86E-01 | 4.19   | 11.91 | 7.25E-01 | 7.64   | 9.63  | 4.28E-01 |
| cg02471183 | -13.12 | 5.64  | 2.01E-02 | -12.37 | 7.87  | 1.16E-01 | -22.94  | 12.83  | 7.37E-02 | -7.63  | 17.04 | 6.54E-01 | -8.12  | 13.18 | 5.38E-01 |
| cg22029709 | 61.60  | 26.50 | 2.01E-02 | 41.89  | 33.24 | 2.08E-01 | 32.02   | 139.42 | 8.18E-01 | 43.23  | 81.14 | 5.94E-01 | 131.71 | 56.27 | 1.92E-02 |
| cg20108328 | -56.75 | 24.41 | 2.01E-02 | -51.68 | 32.23 | 1.09E-01 | 11.92   | 121.19 | 9.22E-01 | -72.78 | 59.53 | 2.21E-01 | -70.53 | 52.36 | 1.78E-01 |
| cg14445814 | 13.33  | 5.73  | 2.01E-02 | 17.16  | 10.45 | 1.01E-01 | -9.56   | 31.04  | 7.58E-01 | 10.29  | 8.57  | 2.30E-01 | 17.85  | 12.29 | 1.46E-01 |
| cg25634175 | -9.75  | 4.19  | 2.01E-02 | -11.71 | 6.93  | 9.13E-02 | -2.86   | 9.48   | 7.63E-01 | -6.35  | 8.01  | 4.28E-01 | -19.26 | 10.34 | 6.25E-02 |
| cg01807313 | -17.09 | 7.35  | 2.01E-02 | -31.36 | 14.56 | 3.13E-02 | -8.31   | 20.14  | 6.80E-01 | -9.59  | 10.30 | 3.52E-01 | -30.38 | 23.02 | 1.87E-01 |
| cg02349373 | -6.53  | 2.81  | 2.01E-02 | -5.20  | 3.98  | 1.92E-01 | -7.35   | 6.25   | 2.39E-01 | 6.41   | 11.11 | 5.64E-01 | -12.11 | 5.77  | 3.60E-02 |
| cg22571654 | 8.07   | 3.47  | 2.01E-02 | 5.28   | 5.03  | 2.93E-01 | 18.17   | 7.03   | 9.74E-03 | 7.68   | 10.30 | 4.56E-01 | 1.48   | 8.54  | 8.62E-01 |
| cg03517998 | -8.29  | 3.57  | 2.01E-02 | -11.11 | 6.69  | 9.69E-02 | 2.77    | 10.49  | 7.91E-01 | -8.70  | 5.08  | 8.67E-02 | -10.90 | 10.92 | 3.18E-01 |
| cg20611294 | -38.05 | 16.37 | 2.01E-02 | 30.90  | 63.23 | 6.25E-01 | -188.85 | 241.55 | 4.34E-01 | -41.71 | 17.56 | 1.75E-02 | -50.83 | 67.39 | 4.51E-01 |
| cg16491046 | -15.99 | 6.88  | 2.01E-02 | -28.21 | 19.52 | 1.48E-01 | 38.83   | 96.43  | 6.87E-01 | -14.11 | 7.71  | 6.74E-02 | -19.49 | 25.17 | 4.39E-01 |
| cg06706454 | 46.93  | 20.19 | 2.01E-02 | 84.39  | 53.15 | 1.12E-01 | -20.00  | 210.07 | 9.24E-01 | 49.63  | 23.11 | 3.17E-02 | -35.96 | 70.23 | 6.09E-01 |
| cg01307115 | 14.94  | 6.43  | 2.01E-02 | 18.18  | 11.03 | 9.93E-02 | 9.63    | 13.24  | 4.67E-01 | 8.27   | 11.81 | 4.84E-01 | 31.54  | 17.95 | 7.89E-02 |
| cg11147278 | 8.11   | 3.49  | 2.01E-02 | 6.97   | 4.69  | 1.37E-01 | 14.85   | 7.91   | 6.04E-02 | 12.92  | 13.88 | 3.52E-01 | 2.86   | 8.09  | 7.24E-01 |
| cg15113009 | -12.98 | 5.59  | 2.01E-02 | -16.48 | 11.55 | 1.53E-01 | -3.11   | 13.83  | 8.22E-01 | -12.58 | 8.40  | 1.34E-01 | -18.99 | 13.94 | 1.73E-01 |
| cg02704217 | 11.91  | 5.13  | 2.01E-02 | 15.83  | 5.97  | 7.95E-03 | 3.45    | 9.89   | 7.27E-01 | -11.20 | 15.56 | 4.72E-01 | 19.32  | 6.90  | 5.10E-03 |
| cg13277493 | 7.43   | 3.20  | 2.01E-02 | 4.27   | 4.84  | 3.78E-01 | 3.95    | 7.16   | 5.81E-01 | 10.46  | 9.64  | 2.78E-01 | 14.28  | 6.34  | 2.44E-02 |
| cg07015591 | 9.14   | 3.93  | 2.01E-02 | 2.65   | 8.22  | 7.47E-01 | 27.84   | 12.45  | 2.54E-02 | 9.23   | 5.29  | 8.11E-02 | 5.53   | 11.44 | 6.29E-01 |
| cg17930365 | -9.95  | 4.28  | 2.01E-02 | -2.17  | 12.71 | 8.64E-01 | -13.73  | 24.56  | 5.76E-01 | -10.76 | 4.87  | 2.71E-02 | -11.65 | 14.92 | 4.35E-01 |
| cg20306180 | -22.11 | 9.52  | 2.02E-02 | -45.70 | 17.13 | 7.64E-03 | -17.70  | 31.87  | 5.79E-01 | 8.79   | 68.92 | 8.99E-01 | -11.31 | 12.46 | 3.64E-01 |

|            |        |       |          |        |       |          |         |        |          |        |       |          |        |       |          |
|------------|--------|-------|----------|--------|-------|----------|---------|--------|----------|--------|-------|----------|--------|-------|----------|
| cg07385490 | 17.77  | 7.65  | 2.02E-02 | 3.15   | 12.48 | 8.01E-01 | 21.76   | 32.72  | 5.06E-01 | 17.87  | 7.83  | 2.25E-02 | 48.41  | 20.21 | 1.66E-02 |
| cg01947224 | 26.17  | 11.26 | 2.02E-02 | 15.90  | 14.08 | 2.59E-01 | 72.07   | 45.89  | 1.16E-01 | 53.64  | 34.12 | 1.16E-01 | 30.46  | 25.82 | 2.38E-01 |
| cg04415798 | 17.31  | 7.45  | 2.02E-02 | 19.23  | 18.21 | 2.91E-01 | 57.81   | 30.62  | 5.91E-02 | 19.27  | 9.24  | 3.70E-02 | -1.19  | 16.07 | 9.41E-01 |
| cg04036182 | 7.21   | 3.10  | 2.02E-02 | 6.87   | 4.50  | 1.27E-01 | 10.63   | 7.70   | 1.67E-01 | 10.50  | 7.51  | 1.62E-01 | 2.23   | 7.09  | 7.53E-01 |
| cg08623644 | 12.15  | 5.23  | 2.02E-02 | 18.54  | 8.47  | 2.86E-02 | 9.33    | 11.11  | 4.01E-01 | 8.15   | 12.10 | 5.00E-01 | 7.09   | 11.42 | 5.35E-01 |
| cg19925025 | 20.20  | 8.70  | 2.02E-02 | -1.37  | 17.55 | 9.38E-01 | 27.14   | 18.35  | 1.39E-01 | 23.13  | 13.90 | 9.61E-02 | 39.00  | 23.40 | 9.56E-02 |
| cg27224823 | -14.17 | 6.10  | 2.02E-02 | -12.22 | 9.47  | 1.97E-01 | -13.86  | 11.42  | 2.25E-01 | -5.11  | 19.75 | 7.96E-01 | -22.76 | 13.48 | 9.12E-02 |
| cg10930308 | 3.51   | 1.51  | 2.02E-02 | 2.51   | 2.24  | 2.61E-01 | 5.33    | 2.99   | 7.46E-02 | 2.46   | 4.41  | 5.77E-01 | 4.17   | 3.66  | 2.54E-01 |
| cg01079599 | -13.46 | 5.80  | 2.02E-02 | -2.21  | 14.42 | 8.78E-01 | -13.78  | 19.22  | 4.73E-01 | -12.97 | 7.15  | 6.96E-02 | -37.11 | 19.37 | 5.53E-02 |
| cg03851398 | 22.28  | 9.59  | 2.02E-02 | -11.77 | 25.52 | 6.45E-01 | -16.61  | 112.84 | 8.83E-01 | 29.60  | 10.73 | 5.79E-03 | 7.71   | 41.94 | 8.54E-01 |
| cg09768821 | -15.84 | 6.82  | 2.02E-02 | -17.73 | 15.57 | 2.55E-01 | 40.30   | 35.73  | 2.59E-01 | -18.42 | 8.37  | 2.78E-02 | -15.60 | 20.77 | 4.53E-01 |
| cg22592490 | 25.18  | 10.84 | 2.02E-02 | 8.63   | 26.31 | 7.43E-01 | 4.79    | 54.07  | 9.29E-01 | 32.21  | 13.19 | 1.46E-02 | 15.36  | 32.06 | 6.32E-01 |
| cg05602799 | -14.80 | 6.37  | 2.02E-02 | -32.92 | 16.78 | 4.98E-02 | -43.40  | 32.57  | 1.83E-01 | -10.56 | 7.40  | 1.54E-01 | -7.42  | 23.00 | 7.47E-01 |
| cg25276694 | 11.84  | 5.10  | 2.02E-02 | 10.44  | 12.75 | 4.13E-01 | 10.68   | 14.25  | 4.54E-01 | 14.39  | 7.28  | 4.82E-02 | 7.90   | 10.83 | 4.66E-01 |
| cg09509553 | -18.45 | 7.94  | 2.02E-02 | -8.47  | 16.60 | 6.10E-01 | -28.75  | 41.35  | 4.87E-01 | -22.29 | 9.93  | 2.47E-02 | -12.56 | 25.93 | 6.28E-01 |
| cg15412772 | 5.99   | 2.58  | 2.02E-02 | 5.27   | 3.13  | 9.17E-02 | 13.05   | 6.62   | 4.86E-02 | -3.11  | 9.84  | 7.51E-01 | 6.41   | 8.19  | 4.34E-01 |
| cg03294491 | 11.34  | 4.88  | 2.02E-02 | 16.64  | 6.26  | 7.91E-03 | 6.81    | 15.11  | 6.52E-01 | -0.91  | 22.16 | 9.67E-01 | 2.37   | 9.97  | 8.12E-01 |
| cg20143982 | 26.46  | 11.39 | 2.02E-02 | 21.57  | 15.50 | 1.64E-01 | 50.88   | 34.37  | 1.39E-01 | 59.45  | 36.70 | 1.05E-01 | 13.75  | 22.65 | 5.44E-01 |
| cg05928448 | 14.10  | 6.07  | 2.02E-02 | 11.66  | 7.18  | 1.04E-01 | 44.55   | 23.89  | 6.22E-02 | 21.13  | 24.61 | 3.91E-01 | 10.04  | 15.22 | 5.10E-01 |
| cg19679543 | -11.00 | 4.73  | 2.02E-02 | -10.09 | 10.06 | 3.16E-01 | -25.90  | 23.48  | 2.70E-01 | -9.66  | 6.08  | 1.12E-01 | -14.06 | 13.05 | 2.81E-01 |
| cg18420965 | 13.01  | 5.60  | 2.02E-02 | 22.03  | 9.75  | 2.39E-02 | 10.72   | 16.17  | 5.07E-01 | 19.58  | 12.04 | 1.04E-01 | 0.63   | 9.71  | 9.48E-01 |
| cg15111475 | 33.41  | 14.39 | 2.02E-02 | 47.26  | 32.95 | 1.51E-01 | -103.92 | 112.66 | 3.56E-01 | 37.50  | 17.98 | 3.70E-02 | 13.60  | 36.87 | 7.12E-01 |
| cg23413809 | 25.25  | 10.87 | 2.02E-02 | 24.86  | 17.98 | 1.67E-01 | 45.56   | 40.86  | 2.65E-01 | 18.42  | 17.02 | 2.79E-01 | 34.87  | 27.61 | 2.07E-01 |
| cg25711078 | -38.24 | 16.47 | 2.02E-02 | -23.48 | 20.05 | 2.42E-01 | -80.52  | 75.58  | 2.87E-01 | -90.67 | 62.13 | 1.44E-01 | -58.76 | 36.13 | 1.04E-01 |
| cg12745325 | 12.15  | 5.23  | 2.02E-02 | 12.39  | 7.85  | 1.14E-01 | 16.41   | 11.35  | 1.48E-01 | 12.70  | 12.61 | 3.14E-01 | 5.66   | 12.68 | 6.55E-01 |
| cg13963210 | -9.13  | 3.93  | 2.02E-02 | -12.75 | 8.31  | 1.25E-01 | -11.76  | 17.66  | 5.05E-01 | -8.59  | 5.00  | 8.57E-02 | -3.49  | 12.00 | 7.71E-01 |
| cg03931660 | 33.46  | 14.41 | 2.02E-02 | 22.99  | 18.76 | 2.20E-01 | 42.80   | 59.22  | 4.70E-01 | 15.40  | 38.38 | 6.88E-01 | 72.47  | 31.48 | 2.13E-02 |
| cg17749520 | 24.12  | 10.39 | 2.02E-02 | 32.57  | 20.19 | 1.07E-01 | -0.17   | 23.24  | 9.94E-01 | 33.17  | 16.71 | 4.71E-02 | 18.18  | 26.92 | 5.00E-01 |
| cg08658787 | 12.94  | 5.57  | 2.02E-02 | 21.62  | 6.30  | 5.97E-04 | -1.95   | 9.98   | 8.45E-01 | 14.76  | 15.76 | 3.49E-01 | 11.24  | 9.86  | 2.54E-01 |
| cg13500819 | -9.08  | 3.91  | 2.02E-02 | -9.04  | 5.12  | 7.76E-02 | -16.64  | 10.41  | 1.10E-01 | 5.15   | 11.58 | 6.57E-01 | -12.64 | 9.70  | 1.93E-01 |
| cg08911237 | 21.25  | 9.15  | 2.03E-02 | 37.93  | 19.99 | 5.78E-02 | 12.57   | 33.78  | 7.10E-01 | 22.14  | 11.67 | 5.78E-02 | -12.19 | 28.69 | 6.71E-01 |
| cg19305111 | -37.11 | 15.98 | 2.03E-02 | -18.34 | 62.01 | 7.67E-01 | 10.44   | 159.13 | 9.48E-01 | -38.72 | 17.35 | 2.56E-02 | -41.99 | 58.64 | 4.74E-01 |
| cg12252039 | -19.02 | 8.19  | 2.03E-02 | -53.28 | 23.43 | 2.30E-02 | -9.33   | 33.60  | 7.81E-01 | -12.76 | 8.93  | 1.53E-01 | -38.16 | 32.64 | 2.42E-01 |
| cg01582066 | -7.34  | 3.16  | 2.03E-02 | -5.59  | 4.18  | 1.82E-01 | -14.21  | 7.80   | 6.83E-02 | -3.68  | 8.70  | 6.72E-01 | -10.06 | 8.71  | 2.48E-01 |
| cg13052625 | -12.75 | 5.49  | 2.03E-02 | -10.28 | 8.62  | 2.33E-01 | -8.24   | 13.13  | 5.31E-01 | -7.75  | 13.32 | 5.61E-01 | -23.37 | 11.01 | 3.37E-02 |

|            |        |       |          |        |       |          |        |        |          |        |       |          |        |       |          |
|------------|--------|-------|----------|--------|-------|----------|--------|--------|----------|--------|-------|----------|--------|-------|----------|
| cg23453466 | -12.42 | 5.35  | 2.03E-02 | -10.21 | 15.31 | 5.05E-01 | -31.19 | 23.20  | 1.79E-01 | -13.22 | 6.25  | 3.45E-02 | 1.74   | 17.53 | 9.21E-01 |
| cg19946742 | -14.72 | 6.34  | 2.03E-02 | -26.26 | 10.74 | 1.44E-02 | -0.23  | 13.00  | 9.86E-01 | -17.18 | 13.21 | 1.93E-01 | -8.47  | 14.85 | 5.68E-01 |
| cg03104569 | -8.27  | 3.56  | 2.03E-02 | -5.29  | 4.82  | 2.73E-01 | -4.91  | 8.29   | 5.54E-01 | -24.45 | 9.60  | 1.09E-02 | -7.42  | 6.35  | 2.43E-01 |
| cg04389426 | 42.31  | 18.23 | 2.03E-02 | 52.92  | 25.30 | 3.65E-02 | 55.67  | 126.05 | 6.59E-01 | 44.96  | 57.28 | 4.32E-01 | 25.44  | 30.42 | 4.03E-01 |
| cg16727774 | -13.86 | 5.97  | 2.03E-02 | -12.58 | 8.72  | 1.49E-01 | 1.23   | 17.11  | 9.43E-01 | -32.11 | 13.10 | 1.42E-02 | -7.14  | 13.30 | 5.91E-01 |
| cg05543593 | -12.33 | 5.31  | 2.03E-02 | -14.04 | 10.13 | 1.66E-01 | -12.60 | 13.12  | 3.37E-01 | -12.41 | 8.35  | 1.38E-01 | -8.85  | 13.45 | 5.10E-01 |
| cg16258337 | -15.64 | 6.74  | 2.03E-02 | -17.26 | 8.85  | 5.11E-02 | -32.87 | 21.43  | 1.25E-01 | -14.74 | 40.95 | 7.19E-01 | -6.74  | 12.41 | 5.87E-01 |
| cg05459190 | 8.57   | 3.69  | 2.03E-02 | 6.09   | 5.06  | 2.29E-01 | 10.07  | 8.68   | 2.46E-01 | 6.21   | 10.37 | 5.49E-01 | 16.97  | 9.22  | 6.58E-02 |
| cg27185128 | 27.22  | 11.73 | 2.03E-02 | 61.75  | 33.68 | 6.67E-02 | 61.91  | 137.32 | 6.52E-01 | 22.41  | 13.01 | 8.50E-02 | 18.21  | 48.30 | 7.06E-01 |
| cg00920395 | -16.78 | 7.23  | 2.03E-02 | -42.11 | 19.68 | 3.24E-02 | -9.64  | 27.26  | 7.24E-01 | -13.38 | 8.76  | 1.27E-01 | -11.50 | 21.42 | 5.91E-01 |
| cg27062243 | -11.98 | 5.16  | 2.03E-02 | -18.93 | 8.84  | 3.22E-02 | -1.13  | 11.96  | 9.24E-01 | -10.98 | 9.92  | 2.69E-01 | -11.59 | 11.50 | 3.13E-01 |
| cg12668403 | -12.70 | 5.47  | 2.03E-02 | -21.62 | 13.88 | 1.19E-01 | -23.31 | 19.35  | 2.28E-01 | -12.27 | 6.71  | 6.75E-02 | 6.82   | 17.31 | 6.94E-01 |
| cg01156629 | -47.68 | 20.54 | 2.03E-02 | -40.75 | 28.25 | 1.49E-01 | -60.60 | 59.54  | 3.09E-01 | -16.02 | 53.02 | 7.63E-01 | -81.73 | 45.71 | 7.38E-02 |
| cg21756587 | 17.44  | 7.51  | 2.03E-02 | 4.32   | 15.73 | 7.84E-01 | 25.29  | 19.95  | 2.05E-01 | 15.80  | 10.64 | 1.38E-01 | 38.01  | 20.75 | 6.69E-02 |
| cg23791600 | -10.60 | 4.57  | 2.03E-02 | -14.89 | 8.34  | 7.44E-02 | -20.47 | 11.25  | 6.88E-02 | -1.71  | 6.38  | 7.89E-01 | -17.33 | 11.01 | 1.16E-01 |
| cg23878404 | -10.09 | 4.35  | 2.03E-02 | -8.38  | 7.57  | 2.68E-01 | 1.93   | 11.45  | 8.66E-01 | -9.10  | 7.11  | 2.01E-01 | -23.83 | 9.88  | 1.59E-02 |
| cg22282764 | -14.37 | 6.19  | 2.03E-02 | -15.33 | 13.74 | 2.65E-01 | -6.95  | 31.86  | 8.27E-01 | -11.96 | 7.57  | 1.14E-01 | -33.48 | 20.75 | 1.07E-01 |
| cg07664990 | 17.71  | 7.63  | 2.03E-02 | 25.12  | 10.56 | 1.74E-02 | 19.55  | 24.81  | 4.31E-01 | 10.36  | 30.00 | 7.30E-01 | 6.50   | 13.54 | 6.31E-01 |
| cg25786780 | 15.74  | 6.78  | 2.03E-02 | 13.07  | 10.57 | 2.17E-01 | 6.08   | 14.03  | 6.64E-01 | 20.04  | 15.90 | 2.08E-01 | 30.65  | 16.32 | 6.04E-02 |
| cg10954944 | 10.52  | 4.54  | 2.03E-02 | 17.57  | 6.77  | 9.45E-03 | 6.84   | 8.19   | 4.04E-01 | 3.67   | 12.56 | 7.70E-01 | 0.55   | 13.41 | 9.68E-01 |
| cg14983236 | 7.42   | 3.20  | 2.03E-02 | 10.68  | 5.48  | 5.12E-02 | 5.92   | 9.01   | 5.11E-01 | 3.54   | 4.77  | 4.58E-01 | 17.32  | 11.09 | 1.19E-01 |
| cg20011940 | -14.81 | 6.38  | 2.03E-02 | -10.37 | 15.06 | 4.91E-01 | 10.51  | 18.87  | 5.78E-01 | -18.94 | 8.15  | 2.01E-02 | -27.31 | 20.99 | 1.93E-01 |
| cg04036272 | 17.23  | 7.43  | 2.03E-02 | 28.67  | 25.57 | 2.62E-01 | -9.27  | 87.92  | 9.16E-01 | 16.02  | 8.03  | 4.61E-02 | 22.09  | 32.15 | 4.92E-01 |
| cg17191715 | -13.32 | 5.74  | 2.03E-02 | 4.37   | 17.82 | 8.06E-01 | -7.71  | 27.50  | 7.79E-01 | -15.43 | 6.39  | 1.58E-02 | -21.44 | 26.56 | 4.19E-01 |
| cg10991752 | -9.64  | 4.16  | 2.03E-02 | -17.23 | 11.22 | 1.25E-01 | -11.42 | 15.32  | 4.56E-01 | -6.36  | 5.01  | 2.04E-01 | -20.18 | 12.98 | 1.20E-01 |
| cg16430510 | 24.27  | 10.46 | 2.03E-02 | -8.59  | 43.58 | 8.44E-01 | 54.87  | 158.18 | 7.29E-01 | 25.15  | 11.04 | 2.27E-02 | 47.98  | 51.81 | 3.54E-01 |
| cg21828432 | -9.57  | 4.12  | 2.03E-02 | -16.01 | 11.96 | 1.81E-01 | -17.76 | 21.22  | 4.03E-01 | -7.01  | 4.80  | 1.44E-01 | -17.39 | 12.79 | 1.74E-01 |
| cg26734950 | 22.73  | 9.80  | 2.03E-02 | 36.89  | 22.69 | 1.04E-01 | 8.29   | 25.16  | 7.42E-01 | 13.61  | 10.52 | 1.96E-01 | 59.96  | 26.20 | 2.21E-02 |
| cg21622977 | -10.15 | 4.38  | 2.03E-02 | -3.31  | 8.64  | 7.01E-01 | -8.62  | 12.20  | 4.80E-01 | -15.69 | 6.24  | 1.19E-02 | -3.82  | 12.55 | 7.61E-01 |
| cg00146645 | 16.02  | 6.90  | 2.03E-02 | 15.62  | 8.96  | 8.14E-02 | 29.25  | 21.84  | 1.80E-01 | 2.89   | 36.03 | 9.36E-01 | 13.77  | 13.28 | 3.00E-01 |
| cg19202014 | 14.04  | 6.05  | 2.03E-02 | 9.89   | 8.41  | 2.39E-01 | 12.88  | 15.24  | 3.98E-01 | 31.47  | 15.48 | 4.20E-02 | 12.09  | 14.63 | 4.08E-01 |
| cg04041447 | 21.50  | 9.27  | 2.04E-02 | 27.66  | 12.32 | 2.48E-02 | 28.59  | 35.36  | 4.19E-01 | 58.04  | 30.56 | 5.76E-02 | 4.13   | 13.92 | 7.67E-01 |
| cg07677446 | -11.67 | 5.03  | 2.04E-02 | -18.20 | 7.64  | 1.73E-02 | -2.16  | 11.24  | 8.48E-01 | -15.49 | 13.75 | 2.60E-01 | -5.50  | 10.43 | 5.98E-01 |
| cg20974659 | 10.43  | 4.50  | 2.04E-02 | 3.87   | 6.66  | 5.61E-01 | 12.33  | 8.61   | 1.52E-01 | 16.57  | 15.19 | 2.75E-01 | 20.97  | 10.48 | 4.55E-02 |
| cg00969823 | -19.74 | 8.51  | 2.04E-02 | -14.85 | 12.06 | 2.18E-01 | -21.07 | 19.57  | 2.81E-01 | -11.32 | 22.87 | 6.21E-01 | -38.95 | 20.38 | 5.60E-02 |

|               |        |       |          |        |       |          |         |        |          |        |       |          |        |       |          |
|---------------|--------|-------|----------|--------|-------|----------|---------|--------|----------|--------|-------|----------|--------|-------|----------|
| cg00970979    | 20.75  | 8.94  | 2.04E-02 | 11.44  | 13.46 | 3.95E-01 | 33.20   | 18.03  | 6.56E-02 | 11.23  | 21.66 | 6.04E-01 | 39.53  | 23.73 | 9.58E-02 |
| cg23044488    | -45.36 | 19.55 | 2.04E-02 | -12.53 | 68.26 | 8.54E-01 | -166.61 | 252.52 | 5.09E-01 | -47.31 | 21.38 | 2.69E-02 | -49.79 | 71.37 | 4.85E-01 |
| cg16951533    | -15.36 | 6.62  | 2.04E-02 | -6.38  | 16.04 | 6.91E-01 | 12.65   | 32.69  | 6.99E-01 | -20.76 | 7.84  | 8.08E-03 | 0.44   | 24.32 | 9.86E-01 |
| cg27201871    | -28.02 | 12.08 | 2.04E-02 | -33.46 | 18.96 | 7.76E-02 | 10.08   | 89.52  | 9.10E-01 | -33.22 | 18.51 | 7.26E-02 | -3.12  | 31.19 | 9.20E-01 |
| cg24469742    | -12.02 | 5.18  | 2.04E-02 | -20.96 | 8.76  | 1.67E-02 | -9.85   | 14.76  | 5.05E-01 | -9.04  | 8.86  | 3.08E-01 | -2.02  | 12.09 | 8.67E-01 |
| cg26259627    | 39.17  | 16.89 | 2.04E-02 | 6.79   | 48.53 | 8.89E-01 | -48.75  | 177.26 | 7.83E-01 | 44.29  | 18.82 | 1.86E-02 | 48.31  | 66.50 | 4.68E-01 |
| cg04617948    | 16.37  | 7.06  | 2.04E-02 | 31.24  | 9.91  | 1.61E-03 | 4.56    | 17.33  | 7.92E-01 | 12.88  | 13.67 | 3.46E-01 | 4.60   | 12.62 | 7.16E-01 |
| cg24422797    | 13.54  | 5.84  | 2.04E-02 | 4.06   | 8.91  | 6.49E-01 | 18.18   | 10.30  | 7.76E-02 | 22.33  | 19.44 | 2.51E-01 | 24.84  | 14.66 | 9.03E-02 |
| cg14096767    | -10.17 | 4.38  | 2.04E-02 | -16.57 | 11.07 | 1.34E-01 | 7.85    | 17.74  | 6.58E-01 | -9.58  | 5.36  | 7.40E-02 | -14.49 | 13.03 | 2.66E-01 |
| cg10269476    | 17.93  | 7.73  | 2.04E-02 | 45.72  | 18.45 | 1.32E-02 | 34.57   | 41.83  | 4.09E-01 | 12.11  | 10.51 | 2.50E-01 | 9.58   | 14.21 | 5.00E-01 |
| cg02531439    | -9.98  | 4.30  | 2.04E-02 | -11.57 | 8.04  | 1.50E-01 | -7.68   | 15.49  | 6.20E-01 | -5.01  | 6.06  | 4.09E-01 | -26.87 | 11.85 | 2.34E-02 |
| cg02622866    | 27.53  | 11.88 | 2.04E-02 | 47.85  | 46.90 | 3.08E-01 | -104.48 | 187.79 | 5.78E-01 | 26.44  | 12.71 | 3.75E-02 | 30.66  | 49.22 | 5.33E-01 |
| cg22675447    | 5.93   | 2.56  | 2.04E-02 | 5.22   | 3.61  | 1.48E-01 | 7.70    | 5.82   | 1.86E-01 | 6.34   | 5.77  | 2.72E-01 | 5.35   | 7.81  | 4.93E-01 |
| cg23075260    | 18.93  | 8.16  | 2.04E-02 | 4.04   | 15.64 | 7.96E-01 | 27.92   | 15.28  | 6.78E-02 | 9.16   | 15.98 | 5.66E-01 | 41.25  | 19.19 | 3.16E-02 |
| cg21578596    | 6.32   | 2.73  | 2.04E-02 | 5.73   | 3.42  | 9.37E-02 | 13.64   | 7.28   | 6.10E-02 | 4.06   | 8.62  | 6.38E-01 | 2.89   | 7.72  | 7.08E-01 |
| cg26303165    | 8.03   | 3.46  | 2.04E-02 | 9.03   | 6.48  | 1.64E-01 | 16.66   | 14.00  | 2.34E-01 | 11.02  | 4.27  | 9.78E-03 | -3.87  | 7.57  | 6.09E-01 |
| cg25114183    | -11.96 | 5.16  | 2.04E-02 | -8.48  | 11.93 | 4.77E-01 | -5.47   | 13.88  | 6.94E-01 | -14.78 | 6.66  | 2.65E-02 | -10.03 | 18.69 | 5.92E-01 |
| cg25020820    | 14.96  | 6.45  | 2.04E-02 | 15.51  | 10.10 | 1.24E-01 | 23.45   | 11.97  | 5.00E-02 | 8.75   | 17.13 | 6.09E-01 | 3.53   | 16.20 | 8.27E-01 |
| cg08185241    | 7.89   | 3.41  | 2.04E-02 | 11.22  | 6.32  | 7.57E-02 | 8.77    | 7.84   | 2.63E-01 | 5.72   | 7.34  | 4.35E-01 | 5.72   | 6.16  | 3.53E-01 |
| cg17280134    | -10.84 | 4.68  | 2.05E-02 | -5.94  | 7.68  | 4.39E-01 | -21.65  | 10.51  | 3.95E-02 | -9.68  | 9.77  | 3.22E-01 | -10.57 | 10.42 | 3.10E-01 |
| cg04934652    | 20.59  | 8.88  | 2.05E-02 | 29.38  | 15.84 | 6.37E-02 | 9.31    | 18.61  | 6.17E-01 | 13.45  | 16.92 | 4.27E-01 | 30.37  | 20.83 | 1.45E-01 |
| cg07673376    | 18.40  | 7.94  | 2.05E-02 | 5.69   | 18.76 | 7.62E-01 | -0.01   | 19.82  | 1.00E+00 | 25.78  | 10.70 | 1.60E-02 | 28.92  | 23.88 | 2.26E-01 |
| cg11161837    | 8.31   | 3.59  | 2.05E-02 | 5.08   | 5.12  | 3.21E-01 | 4.95    | 8.51   | 5.60E-01 | 18.55  | 11.61 | 1.10E-01 | 13.39  | 7.37  | 6.92E-02 |
| cg20312205    | 17.66  | 7.62  | 2.05E-02 | 38.40  | 18.73 | 4.03E-02 | 26.46   | 25.70  | 3.03E-01 | 17.26  | 10.30 | 9.38E-02 | -2.33  | 17.06 | 8.91E-01 |
| cg10605137    | -16.53 | 7.13  | 2.05E-02 | -20.69 | 10.28 | 4.42E-02 | -11.52  | 15.38  | 4.54E-01 | -4.87  | 21.58 | 8.22E-01 | -18.31 | 16.14 | 2.56E-01 |
| cg13074682    | -8.52  | 3.67  | 2.05E-02 | -9.75  | 8.49  | 2.51E-01 | 8.28    | 15.73  | 5.99E-01 | -9.06  | 4.59  | 4.84E-02 | -11.44 | 10.76 | 2.88E-01 |
| cg14709449    | -13.89 | 5.99  | 2.05E-02 | -16.13 | 10.95 | 1.41E-01 | 7.52    | 16.71  | 6.53E-01 | -22.04 | 9.10  | 1.54E-02 | -3.35  | 16.15 | 8.36E-01 |
| cg03966785    | 18.76  | 8.09  | 2.05E-02 | 35.35  | 19.91 | 7.58E-02 | 48.09   | 39.54  | 2.24E-01 | 13.22  | 10.30 | 1.99E-01 | 15.62  | 19.34 | 4.19E-01 |
| cg04679323    | 18.88  | 8.14  | 2.05E-02 | 29.91  | 13.49 | 2.66E-02 | 33.18   | 18.67  | 7.56E-02 | 5.40   | 14.52 | 7.10E-01 | -0.25  | 22.51 | 9.91E-01 |
| cg24945231    | 19.11  | 8.24  | 2.05E-02 | 45.90  | 14.70 | 1.80E-03 | 2.02    | 17.95  | 9.11E-01 | 13.28  | 11.71 | 2.57E-01 | 14.94  | 10.62 | 1.60E-01 |
| ch.2.4251330R | -45.80 | 19.76 | 2.05E-02 | -50.02 | 25.83 | 5.28E-02 | -17.43  | 101.61 | 8.64E-01 | -90.91 | 84.04 | 2.79E-01 | -33.70 | 34.86 | 3.34E-01 |
| cg21611093    | -10.21 | 4.41  | 2.05E-02 | -18.01 | 6.84  | 8.50E-03 | -4.19   | 8.96   | 6.40E-01 | -7.89  | 12.10 | 5.14E-01 | -3.25  | 9.59  | 7.34E-01 |
| cg21011621    | 13.19  | 5.69  | 2.05E-02 | 18.25  | 8.15  | 2.51E-02 | 14.19   | 12.55  | 2.58E-01 | 13.65  | 15.86 | 3.90E-01 | -2.18  | 13.49 | 8.72E-01 |
| cg17151621    | -16.80 | 7.25  | 2.05E-02 | -23.02 | 11.45 | 4.44E-02 | 5.83    | 31.56  | 8.54E-01 | -24.16 | 19.44 | 2.14E-01 | -11.10 | 11.36 | 3.29E-01 |
| cg10745682    | 28.50  | 12.30 | 2.05E-02 | 47.82  | 17.26 | 5.59E-03 | -7.66   | 34.35  | 8.23E-01 | 34.66  | 33.89 | 3.06E-01 | 9.08   | 22.95 | 6.92E-01 |

|            |        |       |          |        |       |          |        |        |          |        |       |          |        |       |          |
|------------|--------|-------|----------|--------|-------|----------|--------|--------|----------|--------|-------|----------|--------|-------|----------|
| cg18335535 | 18.00  | 7.77  | 2.05E-02 | 32.19  | 15.92 | 4.32E-02 | 42.35  | 28.45  | 1.37E-01 | 8.36   | 10.00 | 4.03E-01 | 25.35  | 26.76 | 3.43E-01 |
| cg22012476 | -15.65 | 6.75  | 2.05E-02 | -21.93 | 10.53 | 3.72E-02 | -8.68  | 15.21  | 5.68E-01 | -2.81  | 15.21 | 8.53E-01 | -22.47 | 15.35 | 1.43E-01 |
| cg05642923 | 6.66   | 2.87  | 2.05E-02 | 9.57   | 4.02  | 1.73E-02 | 9.61   | 6.68   | 1.51E-01 | -1.53  | 6.77  | 8.21E-01 | 2.18   | 8.16  | 7.89E-01 |
| cg01159097 | 37.02  | 15.98 | 2.05E-02 | 46.48  | 18.43 | 1.17E-02 | 50.72  | 21.89  | 2.05E-02 | 5.06   | 9.69  | 6.01E-01 | 67.36  | 28.00 | 1.61E-02 |
| cg13515774 | -35.64 | 15.38 | 2.05E-02 | -28.93 | 18.53 | 1.18E-01 | 47.97  | 117.72 | 6.84E-01 | -43.17 | 37.72 | 2.52E-01 | -73.11 | 43.00 | 8.91E-02 |
| cg25388738 | -14.60 | 6.30  | 2.05E-02 | -8.39  | 12.36 | 4.97E-01 | 3.52   | 18.47  | 8.49E-01 | -15.64 | 7.62  | 4.00E-02 | -41.09 | 18.57 | 2.69E-02 |
| cg05970721 | 16.71  | 7.21  | 2.05E-02 | 22.84  | 9.75  | 1.92E-02 | 25.99  | 18.27  | 1.55E-01 | 7.67   | 25.91 | 7.67E-01 | -1.94  | 15.40 | 9.00E-01 |
| cg14341551 | 10.15  | 4.38  | 2.05E-02 | 16.12  | 10.73 | 1.33E-01 | 10.60  | 12.50  | 3.96E-01 | 7.86   | 5.41  | 1.46E-01 | 18.38  | 18.68 | 3.25E-01 |
| cg25579085 | 10.74  | 4.64  | 2.05E-02 | 4.34   | 11.32 | 7.02E-01 | -10.61 | 19.39  | 5.84E-01 | 10.16  | 8.86  | 2.51E-01 | 15.65  | 6.55  | 1.70E-02 |
| cg11826295 | -12.13 | 5.24  | 2.05E-02 | -2.73  | 14.77 | 8.54E-01 | -31.42 | 24.23  | 1.95E-01 | -12.20 | 5.93  | 3.96E-02 | -16.91 | 24.10 | 4.83E-01 |
| cg10768996 | 22.11  | 9.54  | 2.05E-02 | 7.24   | 17.19 | 6.73E-01 | 21.50  | 18.50  | 2.45E-01 | 42.49  | 19.41 | 2.86E-02 | 21.10  | 22.27 | 3.43E-01 |
| cg19011001 | 7.81   | 3.37  | 2.05E-02 | 5.63   | 4.24  | 1.85E-01 | 14.57  | 8.33   | 8.02E-02 | 15.15  | 10.98 | 1.68E-01 | 3.99   | 10.08 | 6.92E-01 |
| cg00988548 | -13.65 | 5.89  | 2.06E-02 | -24.95 | 11.58 | 3.11E-02 | -25.06 | 18.07  | 1.65E-01 | -4.89  | 6.23  | 4.33E-01 | -22.44 | 15.22 | 1.40E-01 |
| cg05774787 | 27.94  | 12.06 | 2.06E-02 | 6.47   | 32.34 | 8.41E-01 | 6.27   | 160.09 | 9.69E-01 | 30.80  | 13.52 | 2.27E-02 | 41.92  | 49.69 | 3.99E-01 |
| cg02002217 | -3.57  | 1.54  | 2.06E-02 | -3.60  | 2.65  | 1.74E-01 | -2.29  | 3.73   | 5.40E-01 | -4.05  | 2.56  | 1.14E-01 | -3.82  | 4.29  | 3.73E-01 |
| cg00002591 | 22.31  | 9.64  | 2.06E-02 | 6.64   | 24.89 | 7.90E-01 | 17.98  | 30.28  | 5.53E-01 | 21.46  | 12.03 | 7.46E-02 | 53.25  | 29.34 | 6.95E-02 |
| cg11975397 | 3.81   | 1.64  | 2.06E-02 | 3.77   | 2.36  | 1.10E-01 | 3.56   | 3.56   | 3.17E-01 | 10.19  | 4.70  | 3.03E-02 | -0.18  | 3.91  | 9.63E-01 |
| cg25204186 | 19.48  | 8.41  | 2.06E-02 | 12.23  | 15.86 | 4.41E-01 | 14.10  | 18.86  | 4.55E-01 | 19.06  | 13.43 | 1.56E-01 | 45.00  | 23.51 | 5.56E-02 |
| cg22536211 | -16.86 | 7.28  | 2.06E-02 | -2.55  | 16.15 | 8.74E-01 | 1.02   | 27.38  | 9.70E-01 | -18.74 | 9.28  | 4.35E-02 | -44.12 | 21.89 | 4.39E-02 |
| cg10592454 | -12.21 | 5.27  | 2.06E-02 | -3.60  | 5.87  | 5.40E-01 | -17.62 | 9.23   | 5.63E-02 | -31.00 | 13.71 | 2.37E-02 | -11.84 | 9.48  | 2.12E-01 |
| cg03898832 | 17.56  | 7.58  | 2.06E-02 | 34.14  | 19.45 | 7.93E-02 | 32.57  | 23.02  | 1.57E-01 | 10.19  | 9.31  | 2.74E-01 | 27.28  | 27.48 | 3.21E-01 |
| cg05045130 | 35.62  | 15.38 | 2.06E-02 | 45.28  | 21.21 | 3.28E-02 | 9.37   | 37.78  | 8.04E-01 | 76.27  | 32.64 | 1.95E-02 | 3.75   | 28.54 | 8.95E-01 |
| cg26386826 | -14.11 | 6.09  | 2.06E-02 | -20.92 | 9.55  | 2.85E-02 | -5.22  | 12.81  | 6.84E-01 | 7.46   | 17.22 | 6.65E-01 | -22.11 | 12.39 | 7.44E-02 |
| cg17200690 | 12.38  | 5.35  | 2.06E-02 | 14.83  | 7.53  | 4.89E-02 | 18.12  | 11.45  | 1.14E-01 | -2.49  | 16.98 | 8.83E-01 | 6.73   | 12.69 | 5.96E-01 |
| cg08378932 | -8.71  | 3.76  | 2.06E-02 | -22.47 | 8.75  | 1.02E-02 | -9.75  | 13.36  | 4.66E-01 | -5.56  | 4.25  | 1.91E-01 | -4.37  | 10.98 | 6.90E-01 |
| cg05824174 | -47.94 | 20.70 | 2.06E-02 | -48.93 | 27.21 | 7.21E-02 | 28.73  | 120.40 | 8.11E-01 | -41.06 | 49.96 | 4.11E-01 | -61.00 | 44.17 | 1.67E-01 |
| cg02786368 | 15.32  | 6.62  | 2.06E-02 | 11.52  | 9.34  | 2.17E-01 | 25.93  | 14.46  | 7.30E-02 | 11.12  | 22.01 | 6.13E-01 | 15.67  | 14.88 | 2.92E-01 |
| cg06452129 | -13.35 | 5.77  | 2.06E-02 | -28.13 | 14.89 | 5.88E-02 | -9.90  | 22.28  | 6.57E-01 | -12.40 | 6.87  | 7.10E-02 | 3.47   | 20.60 | 8.66E-01 |
| cg13282294 | 15.84  | 6.84  | 2.06E-02 | 17.94  | 20.32 | 3.77E-01 | 56.35  | 32.78  | 8.56E-02 | 16.03  | 7.78  | 3.94E-02 | -14.91 | 25.89 | 5.65E-01 |
| cg01273336 | -11.13 | 4.81  | 2.06E-02 | -19.59 | 11.07 | 7.67E-02 | -15.03 | 17.88  | 4.00E-01 | -7.64  | 6.06  | 2.08E-01 | -14.07 | 14.53 | 3.33E-01 |
| cg10520924 | 19.76  | 8.54  | 2.06E-02 | 28.87  | 22.01 | 1.90E-01 | 41.14  | 27.92  | 1.41E-01 | 10.82  | 10.36 | 2.97E-01 | 54.65  | 30.67 | 7.47E-02 |
| cg02446647 | 13.68  | 5.91  | 2.06E-02 | 24.11  | 10.57 | 2.26E-02 | 11.05  | 14.54  | 4.47E-01 | 13.28  | 11.02 | 2.28E-01 | 2.16   | 12.19 | 8.59E-01 |
| cg13419087 | 15.83  | 6.84  | 2.06E-02 | 17.24  | 9.35  | 6.51E-02 | 21.74  | 18.97  | 2.52E-01 | 16.39  | 13.24 | 2.16E-01 | -8.79  | 26.26 | 7.38E-01 |
| cg23181170 | -10.03 | 4.33  | 2.06E-02 | 2.61   | 12.29 | 8.32E-01 | -6.68  | 23.18  | 7.73E-01 | -13.09 | 5.03  | 9.18E-03 | -3.99  | 13.90 | 7.74E-01 |
| cg27171280 | 35.30  | 15.25 | 2.06E-02 | 4.79   | 35.77 | 8.93E-01 | -12.01 | 125.29 | 9.24E-01 | 40.78  | 17.97 | 2.33E-02 | 62.67  | 52.61 | 2.34E-01 |



|            |        |       |          |        |       |          |         |        |          |        |       |          |        |       |          |
|------------|--------|-------|----------|--------|-------|----------|---------|--------|----------|--------|-------|----------|--------|-------|----------|
| cg11756777 | -12.55 | 5.42  | 2.06E-02 | -12.41 | 8.93  | 1.64E-01 | 0.04    | 14.00  | 9.98E-01 | -8.78  | 6.06  | 1.47E-01 | -33.20 | 12.33 | 7.07E-03 |
| cg01435464 | 24.26  | 10.48 | 2.06E-02 | 23.28  | 18.35 | 2.05E-01 | 26.81   | 22.36  | 2.31E-01 | 25.25  | 18.23 | 1.66E-01 | 19.65  | 29.78 | 5.09E-01 |
| cg12074329 | 29.89  | 12.91 | 2.06E-02 | 36.18  | 14.14 | 1.05E-02 | -40.79  | 102.20 | 6.90E-01 | -25.11 | 58.66 | 6.69E-01 | 15.52  | 40.56 | 7.02E-01 |
| cg01211424 | -11.48 | 4.96  | 2.06E-02 | -7.31  | 14.93 | 6.25E-01 | -29.50  | 20.36  | 1.47E-01 | -10.13 | 5.70  | 7.57E-02 | -17.07 | 18.25 | 3.50E-01 |
| cg25008346 | 24.30  | 10.50 | 2.07E-02 | 44.83  | 20.64 | 2.99E-02 | 43.71   | 34.05  | 1.99E-01 | 25.03  | 11.38 | 2.79E-02 | -9.52  | 22.05 | 6.66E-01 |
| cg22061832 | 8.89   | 3.84  | 2.07E-02 | 14.76  | 5.38  | 6.07E-03 | 9.64    | 8.49   | 2.56E-01 | 6.02   | 10.72 | 5.75E-01 | -1.96  | 7.85  | 8.03E-01 |
| cg26199445 | 16.86  | 7.29  | 2.07E-02 | 21.13  | 9.68  | 2.90E-02 | 35.90   | 18.74  | 5.55E-02 | -3.01  | 23.69 | 8.99E-01 | -0.17  | 16.33 | 9.92E-01 |
| cg16393715 | 15.83  | 6.84  | 2.07E-02 | 13.18  | 10.51 | 2.10E-01 | 20.15   | 13.95  | 1.49E-01 | 16.55  | 19.21 | 3.89E-01 | 15.76  | 14.94 | 2.91E-01 |
| cg09456782 | 10.31  | 4.46  | 2.07E-02 | 13.86  | 7.17  | 5.32E-02 | 11.90   | 8.75   | 1.74E-01 | 19.90  | 10.67 | 6.21E-02 | -2.18  | 8.46  | 7.97E-01 |
| cg00099766 | 10.05  | 4.34  | 2.07E-02 | 10.71  | 5.74  | 6.19E-02 | 17.04   | 10.26  | 9.68E-02 | 4.99   | 18.05 | 7.82E-01 | 3.00   | 9.96  | 7.63E-01 |
| cg21926451 | -18.15 | 7.84  | 2.07E-02 | -19.17 | 15.63 | 2.20E-01 | -15.08  | 33.01  | 6.48E-01 | -14.00 | 11.26 | 2.14E-01 | -27.47 | 17.24 | 1.11E-01 |
| cg21771660 | -45.10 | 19.49 | 2.07E-02 | -26.97 | 21.11 | 2.01E-01 | 30.77   | 73.02  | 6.73E-01 | -99.63 | 45.47 | 2.84E-02 | -67.02 | 34.29 | 5.07E-02 |
| cg12494774 | 10.60  | 4.58  | 2.07E-02 | 6.35   | 6.76  | 3.48E-01 | 21.12   | 9.75   | 3.03E-02 | 13.11  | 11.32 | 2.47E-01 | 5.61   | 11.57 | 6.27E-01 |
| cg15456082 | -11.59 | 5.01  | 2.07E-02 | -18.50 | 8.11  | 2.25E-02 | 2.58    | 11.54  | 8.23E-01 | -8.08  | 11.36 | 4.77E-01 | -14.62 | 10.32 | 1.57E-01 |
| cg13550642 | 20.99  | 9.07  | 2.07E-02 | 38.19  | 18.06 | 3.44E-02 | 17.78   | 17.76  | 3.17E-01 | 5.67   | 15.12 | 7.07E-01 | 36.93  | 25.53 | 1.48E-01 |
| cg26250143 | 60.19  | 26.01 | 2.07E-02 | 102.08 | 69.35 | 1.41E-01 | -155.33 | 281.35 | 5.81E-01 | 51.59  | 29.66 | 8.20E-02 | 91.61  | 91.06 | 3.14E-01 |
| cg06602333 | 27.97  | 12.09 | 2.07E-02 | 41.79  | 16.98 | 1.38E-02 | -8.69   | 35.03  | 8.04E-01 | 53.92  | 39.56 | 1.73E-01 | 9.92   | 22.82 | 6.64E-01 |
| cg07598034 | 13.42  | 5.80  | 2.07E-02 | 17.82  | 13.15 | 1.75E-01 | -87.04  | 95.88  | 3.64E-01 | 22.74  | 25.82 | 3.78E-01 | 12.14  | 6.69  | 6.97E-02 |
| cg02691819 | 31.63  | 13.67 | 2.07E-02 | 91.53  | 48.03 | 5.67E-02 | 14.54   | 63.36  | 8.18E-01 | 26.89  | 15.39 | 8.06E-02 | 27.82  | 47.38 | 5.57E-01 |
| cg14372472 | -9.38  | 4.05  | 2.07E-02 | -15.35 | 8.48  | 7.04E-02 | -15.27  | 12.50  | 2.22E-01 | -5.67  | 5.58  | 3.10E-01 | -9.20  | 10.88 | 3.98E-01 |
| cg18289141 | 18.17  | 7.85  | 2.07E-02 | 20.33  | 10.98 | 6.42E-02 | 40.84   | 24.89  | 1.01E-01 | 17.72  | 21.66 | 4.13E-01 | 5.35   | 15.47 | 7.29E-01 |
| cg12305265 | -9.26  | 4.00  | 2.07E-02 | -3.87  | 7.10  | 5.86E-01 | -7.27   | 9.19   | 4.29E-01 | -12.72 | 10.95 | 2.45E-01 | -13.79 | 6.68  | 3.90E-02 |
| cg00344920 | -16.67 | 7.21  | 2.07E-02 | -44.31 | 17.13 | 9.69E-03 | -14.48  | 33.54  | 6.66E-01 | -10.67 | 5.83  | 6.72E-02 | -16.37 | 21.10 | 4.38E-01 |
| cg10511357 | -11.45 | 4.95  | 2.07E-02 | -22.93 | 9.18  | 1.26E-02 | -6.63   | 11.78  | 5.73E-01 | -4.94  | 8.72  | 5.71E-01 | -9.62  | 10.79 | 3.73E-01 |
| cg20099005 | -9.37  | 4.05  | 2.07E-02 | -11.19 | 5.62  | 4.65E-02 | -0.42   | 10.57  | 9.68E-01 | -9.51  | 15.70 | 5.44E-01 | -10.71 | 7.83  | 1.71E-01 |
| cg25916404 | 20.69  | 8.94  | 2.07E-02 | 20.86  | 16.95 | 2.19E-01 | 13.38   | 19.30  | 4.88E-01 | 23.76  | 14.12 | 9.25E-02 | 23.42  | 27.45 | 3.94E-01 |
| cg06035374 | -35.90 | 15.52 | 2.07E-02 | -45.08 | 18.57 | 1.52E-02 | -4.14   | 48.03  | 9.31E-01 | 2.98   | 69.63 | 9.66E-01 | -27.98 | 40.47 | 4.89E-01 |
| cg27143204 | 14.80  | 6.40  | 2.07E-02 | 8.70   | 7.09  | 2.20E-01 | 36.30   | 11.93  | 2.34E-03 | 8.15   | 15.06 | 5.88E-01 | 10.12  | 11.05 | 3.60E-01 |
| cg21690489 | -25.72 | 11.12 | 2.07E-02 | -28.67 | 15.11 | 5.78E-02 | -1.68   | 30.65  | 9.56E-01 | -37.00 | 34.00 | 2.76E-01 | -27.37 | 23.71 | 2.48E-01 |
| cg21901156 | 12.76  | 5.52  | 2.07E-02 | 7.14   | 7.31  | 3.29E-01 | 27.76   | 9.46   | 3.35E-03 | 6.43   | 17.27 | 7.09E-01 | 6.66   | 11.44 | 5.60E-01 |
| cg15323528 | -36.81 | 15.91 | 2.07E-02 | -39.37 | 21.98 | 7.33E-02 | -99.77  | 46.47  | 3.18E-02 | -30.66 | 45.32 | 4.99E-01 | -2.94  | 32.81 | 9.29E-01 |
| cg02681733 | 28.87  | 12.48 | 2.07E-02 | -8.82  | 39.27 | 8.22E-01 | 32.90   | 93.91  | 7.26E-01 | 32.98  | 14.25 | 2.06E-02 | 34.00  | 37.00 | 3.58E-01 |
| cg09969043 | 45.52  | 19.68 | 2.07E-02 | 11.90  | 11.77 | 3.12E-01 | 81.09   | 46.46  | 8.09E-02 | 113.99 | 32.11 | 3.86E-04 | 27.63  | 14.74 | 6.08E-02 |
| cg21711862 | -13.23 | 5.72  | 2.07E-02 | -15.28 | 8.32  | 6.63E-02 | -13.73  | 16.21  | 3.97E-01 | -15.26 | 17.74 | 3.90E-01 | -9.07  | 10.46 | 3.86E-01 |
| cg21584862 | -12.22 | 5.29  | 2.07E-02 | -27.57 | 12.80 | 3.12E-02 | -29.56  | 27.03  | 2.74E-01 | -6.79  | 6.44  | 2.91E-01 | -15.50 | 15.47 | 3.16E-01 |

|            |        |       |          |        |       |          |        |        |          |        |       |          |        |       |          |
|------------|--------|-------|----------|--------|-------|----------|--------|--------|----------|--------|-------|----------|--------|-------|----------|
| cg00122406 | 10.68  | 4.62  | 2.07E-02 | 17.69  | 6.33  | 5.17E-03 | -0.04  | 13.18  | 9.97E-01 | 2.79   | 10.88 | 7.98E-01 | 4.59   | 11.40 | 6.87E-01 |
| cg26739951 | -35.22 | 15.23 | 2.07E-02 | -4.97  | 52.55 | 9.25E-01 | 332.12 | 270.02 | 2.19E-01 | -42.24 | 16.46 | 1.03E-02 | 5.28   | 63.97 | 9.34E-01 |
| cg02512352 | 25.53  | 11.04 | 2.07E-02 | 16.82  | 34.59 | 6.27E-01 | 78.36  | 115.25 | 4.97E-01 | 30.77  | 12.56 | 1.43E-02 | -5.65  | 32.33 | 8.61E-01 |
| cg10211744 | -14.23 | 6.15  | 2.07E-02 | -21.32 | 8.96  | 1.74E-02 | -14.88 | 14.61  | 3.08E-01 | 0.07   | 18.29 | 9.97E-01 | -6.51  | 12.60 | 6.06E-01 |
| cg11441533 | -32.62 | 14.11 | 2.08E-02 | -68.73 | 21.10 | 1.12E-03 | -37.28 | 34.83  | 2.84E-01 | -15.94 | 9.11  | 8.01E-02 | -20.60 | 29.37 | 4.83E-01 |
| cg15484899 | 17.70  | 7.66  | 2.08E-02 | 7.67   | 13.60 | 5.73E-01 | 33.15  | 20.49  | 1.06E-01 | 22.05  | 12.97 | 8.93E-02 | 15.19  | 17.32 | 3.80E-01 |
| cg02757488 | -11.71 | 5.06  | 2.08E-02 | -17.12 | 7.36  | 2.01E-02 | -10.85 | 9.97   | 2.76E-01 | 7.24   | 18.14 | 6.90E-01 | -7.20  | 11.57 | 5.34E-01 |
| cg23424003 | 10.88  | 4.70  | 2.08E-02 | 8.72   | 9.93  | 3.80E-01 | 21.83  | 16.12  | 1.76E-01 | 11.02  | 6.67  | 9.83E-02 | 8.18   | 10.74 | 4.46E-01 |
| cg03459415 | -8.12  | 3.51  | 2.08E-02 | -4.63  | 6.13  | 4.50E-01 | -3.03  | 8.43   | 7.19E-01 | -14.19 | 6.10  | 1.99E-02 | -8.19  | 8.59  | 3.40E-01 |
| cg11983942 | -12.67 | 5.48  | 2.08E-02 | -13.57 | 8.28  | 1.01E-01 | -18.58 | 13.48  | 1.68E-01 | -6.72  | 12.54 | 5.92E-01 | -11.50 | 12.07 | 3.41E-01 |
| cg02335441 | -33.42 | 14.45 | 2.08E-02 | -16.43 | 21.64 | 4.48E-01 | -32.09 | 36.28  | 3.77E-01 | -35.15 | 38.29 | 3.59E-01 | -63.24 | 28.75 | 2.78E-02 |
| cg04005707 | 13.34  | 5.77  | 2.08E-02 | 10.26  | 10.43 | 3.26E-01 | 12.27  | 16.41  | 4.55E-01 | 26.74  | 11.41 | 1.91E-02 | 5.86   | 10.28 | 5.69E-01 |
| cg16588500 | -18.43 | 7.97  | 2.08E-02 | 1.40   | 22.90 | 9.51E-01 | -17.28 | 77.28  | 8.23E-01 | -20.59 | 8.81  | 1.94E-02 | -31.71 | 36.08 | 3.79E-01 |
| cg24907075 | -12.30 | 5.32  | 2.08E-02 | -25.49 | 14.18 | 7.21E-02 | 15.36  | 28.24  | 5.87E-01 | -10.15 | 6.21  | 1.02E-01 | -20.20 | 17.85 | 2.58E-01 |
| cg06549863 | -11.33 | 4.90  | 2.08E-02 | -16.37 | 11.94 | 1.70E-01 | 4.80   | 15.67  | 7.59E-01 | -11.39 | 6.20  | 6.65E-02 | -17.66 | 14.80 | 2.33E-01 |
| cg03122282 | -16.63 | 7.19  | 2.08E-02 | -18.02 | 15.40 | 2.42E-01 | -20.83 | 16.39  | 2.04E-01 | -10.47 | 10.95 | 3.39E-01 | -26.46 | 18.13 | 1.44E-01 |
| cg18591013 | 18.83  | 8.15  | 2.08E-02 | 24.18  | 18.00 | 1.79E-01 | -5.25  | 22.39  | 8.15E-01 | 23.07  | 10.68 | 3.08E-02 | 14.28  | 28.59 | 6.17E-01 |
| cg07277869 | -23.72 | 10.26 | 2.08E-02 | -17.38 | 12.76 | 1.73E-01 | -39.84 | 30.51  | 1.92E-01 | 16.78  | 42.19 | 6.91E-01 | -49.46 | 24.10 | 4.01E-02 |
| cg08928189 | -17.58 | 7.61  | 2.08E-02 | -17.08 | 11.63 | 1.42E-01 | -10.13 | 17.89  | 5.71E-01 | -4.94  | 14.78 | 7.38E-01 | -44.20 | 17.81 | 1.31E-02 |
| cg22680761 | -9.88  | 4.27  | 2.08E-02 | -11.38 | 8.44  | 1.77E-01 | -2.49  | 13.53  | 8.54E-01 | -10.03 | 5.97  | 9.32E-02 | -11.98 | 11.78 | 3.09E-01 |
| cg06183469 | 16.51  | 7.14  | 2.08E-02 | -6.52  | 18.30 | 7.22E-01 | -0.51  | 25.09  | 9.84E-01 | 22.07  | 8.49  | 9.32E-03 | 32.59  | 29.41 | 2.68E-01 |
| cg09567642 | -28.12 | 12.17 | 2.08E-02 | 1.59   | 48.88 | 9.74E-01 | -42.07 | 205.88 | 8.38E-01 | -30.41 | 12.85 | 1.79E-02 | -21.12 | 62.79 | 7.37E-01 |
| cg11645556 | 14.31  | 6.19  | 2.08E-02 | 12.64  | 7.63  | 9.78E-02 | 22.82  | 14.18  | 1.08E-01 | 40.52  | 19.35 | 3.62E-02 | 1.81   | 11.30 | 8.73E-01 |
| cg27382409 | -10.74 | 4.65  | 2.08E-02 | -8.63  | 6.56  | 1.88E-01 | -15.48 | 12.28  | 2.07E-01 | -6.96  | 12.02 | 5.63E-01 | -15.34 | 10.25 | 1.34E-01 |
| cg11688578 | 24.10  | 10.43 | 2.08E-02 | 32.41  | 21.87 | 1.38E-01 | 58.69  | 44.31  | 1.85E-01 | 15.75  | 13.45 | 2.42E-01 | 34.56  | 30.61 | 2.59E-01 |
| cg15015892 | 18.98  | 8.21  | 2.08E-02 | -14.56 | 27.38 | 5.95E-01 | -65.17 | 96.24  | 4.98E-01 | 23.04  | 8.89  | 9.54E-03 | 22.44  | 37.23 | 5.47E-01 |
| cg21081971 | 7.80   | 3.38  | 2.08E-02 | 10.70  | 5.00  | 3.25E-02 | -0.18  | 7.95   | 9.82E-01 | 11.80  | 7.76  | 1.28E-01 | 4.16   | 8.06  | 6.06E-01 |
| cg15436385 | -12.60 | 5.45  | 2.08E-02 | -9.17  | 7.21  | 2.03E-01 | -26.78 | 13.54  | 4.80E-02 | -1.46  | 15.90 | 9.27E-01 | -19.13 | 14.14 | 1.76E-01 |
| cg12034678 | 12.43  | 5.38  | 2.08E-02 | 26.84  | 19.69 | 1.73E-01 | 25.57  | 38.30  | 5.04E-01 | 13.49  | 6.27  | 3.14E-02 | -0.08  | 13.07 | 9.95E-01 |
| cg02127980 | 8.69   | 3.76  | 2.08E-02 | 6.16   | 4.67  | 1.87E-01 | 13.39  | 10.10  | 1.85E-01 | 27.56  | 12.66 | 2.95E-02 | 3.27   | 10.65 | 7.59E-01 |
| cg02764250 | -9.53  | 4.13  | 2.08E-02 | -16.46 | 9.62  | 8.70E-02 | -8.58  | 20.99  | 6.83E-01 | -9.56  | 5.09  | 6.05E-02 | 0.86   | 11.88 | 9.42E-01 |
| cg19701879 | -10.53 | 4.55  | 2.08E-02 | -12.93 | 9.61  | 1.79E-01 | -8.46  | 20.22  | 6.76E-01 | -8.85  | 5.92  | 1.35E-01 | -14.75 | 12.54 | 2.40E-01 |
| cg03489020 | -8.67  | 3.75  | 2.08E-02 | -18.41 | 7.88  | 1.95E-02 | -3.70  | 11.46  | 7.47E-01 | -6.02  | 5.22  | 2.49E-01 | -6.62  | 9.72  | 4.96E-01 |
| cg26705765 | -64.94 | 28.10 | 2.08E-02 | -89.33 | 44.63 | 4.53E-02 | 16.75  | 161.71 | 9.18E-01 | -96.51 | 57.55 | 9.36E-02 | -20.94 | 48.57 | 6.66E-01 |
| cg04636841 | 28.24  | 12.22 | 2.08E-02 | 28.15  | 16.70 | 9.19E-02 | -85.30 | 75.25  | 2.57E-01 | 67.03  | 44.99 | 1.36E-01 | 28.73  | 19.83 | 1.47E-01 |

|            |        |       |          |        |       |          |         |        |          |        |       |          |        |       |          |
|------------|--------|-------|----------|--------|-------|----------|---------|--------|----------|--------|-------|----------|--------|-------|----------|
| cg27203090 | -48.19 | 20.85 | 2.09E-02 | -11.55 | 41.64 | 7.82E-01 | -50.98  | 209.52 | 8.08E-01 | -69.53 | 27.13 | 1.04E-02 | -24.96 | 54.14 | 6.45E-01 |
| cg03960699 | 44.00  | 19.04 | 2.09E-02 | 47.62  | 23.01 | 3.85E-02 | -5.99   | 73.17  | 9.35E-01 | -5.33  | 64.24 | 9.34E-01 | 76.88  | 47.70 | 1.07E-01 |
| cg17200564 | 12.37  | 5.35  | 2.09E-02 | 22.48  | 14.30 | 1.16E-01 | 13.81   | 25.78  | 5.92E-01 | 13.36  | 6.22  | 3.15E-02 | -17.14 | 19.52 | 3.80E-01 |
| cg01680667 | -48.42 | 20.96 | 2.09E-02 | -45.95 | 26.29 | 8.05E-02 | -176.17 | 86.21  | 4.10E-02 | -8.14  | 83.93 | 9.23E-01 | -34.18 | 42.50 | 4.21E-01 |
| cg03769939 | -7.44  | 3.22  | 2.09E-02 | -8.38  | 4.30  | 5.13E-02 | -8.68   | 8.23   | 2.92E-01 | 0.09   | 9.41  | 9.92E-01 | -8.44  | 7.86  | 2.83E-01 |
| cg08564601 | 9.74   | 4.22  | 2.09E-02 | 11.86  | 5.58  | 3.36E-02 | 18.34   | 10.25  | 7.34E-02 | 12.48  | 21.01 | 5.53E-01 | -2.86  | 8.98  | 7.50E-01 |
| cg16715127 | 18.06  | 7.82  | 2.09E-02 | 17.97  | 15.11 | 2.34E-01 | 12.52   | 16.69  | 4.53E-01 | 11.78  | 13.26 | 3.74E-01 | 38.73  | 19.22 | 4.39E-02 |
| cg07333223 | 38.33  | 16.59 | 2.09E-02 | 39.67  | 29.10 | 1.73E-01 | -118.75 | 187.69 | 5.27E-01 | 47.76  | 21.98 | 2.98E-02 | -8.59  | 53.10 | 8.71E-01 |
| cg05358758 | -11.66 | 5.05  | 2.09E-02 | -1.26  | 9.50  | 8.95E-01 | -19.21  | 17.94  | 2.84E-01 | -10.44 | 6.04  | 8.36E-02 | -28.99 | 12.43 | 1.97E-02 |
| cg23326901 | -19.48 | 8.43  | 2.09E-02 | -33.08 | 23.20 | 1.54E-01 | 55.96   | 68.25  | 4.12E-01 | -17.09 | 9.61  | 7.55E-02 | -33.87 | 29.23 | 2.47E-01 |
| cg01269913 | -16.13 | 6.98  | 2.09E-02 | -24.37 | 12.85 | 5.80E-02 | 5.16    | 27.05  | 8.49E-01 | -13.18 | 9.57  | 1.68E-01 | -21.34 | 21.44 | 3.20E-01 |
| cg01422009 | 12.85  | 5.56  | 2.09E-02 | 11.02  | 7.72  | 1.53E-01 | 23.17   | 12.30  | 5.96E-02 | 11.56  | 16.43 | 4.82E-01 | 6.57   | 13.83 | 6.35E-01 |
| cg06352873 | -9.63  | 4.17  | 2.09E-02 | -22.34 | 9.69  | 2.12E-02 | -6.66   | 11.92  | 5.76E-01 | -4.65  | 5.52  | 4.00E-01 | -16.61 | 11.93 | 1.64E-01 |
| cg20183802 | 14.26  | 6.17  | 2.09E-02 | 16.46  | 10.60 | 1.21E-01 | 24.19   | 14.23  | 8.92E-02 | 18.76  | 12.25 | 1.26E-01 | -2.87  | 13.18 | 8.27E-01 |
| cg04608722 | -19.84 | 8.59  | 2.09E-02 | -4.19  | 23.76 | 8.60E-01 | -54.45  | 39.63  | 1.69E-01 | -21.57 | 9.85  | 2.86E-02 | -5.61  | 34.33 | 8.70E-01 |
| cg26239051 | 33.42  | 14.47 | 2.09E-02 | 37.35  | 16.81 | 2.63E-02 | 18.09   | 92.30  | 8.45E-01 | -1.98  | 84.81 | 9.81E-01 | 26.09  | 31.94 | 4.14E-01 |
| cg03543495 | 26.80  | 11.60 | 2.09E-02 | 49.34  | 25.54 | 5.34E-02 | 10.66   | 77.31  | 8.90E-01 | 18.53  | 13.81 | 1.80E-01 | 50.40  | 45.36 | 2.66E-01 |
| cg04522792 | -15.25 | 6.60  | 2.09E-02 | -11.00 | 16.16 | 4.96E-01 | -25.58  | 19.14  | 1.81E-01 | -14.96 | 8.37  | 7.37E-02 | -11.54 | 21.88 | 5.98E-01 |
| cg27101899 | 14.87  | 6.44  | 2.09E-02 | 19.54  | 16.75 | 2.43E-01 | -13.07  | 20.42  | 5.22E-01 | 16.48  | 7.77  | 3.38E-02 | 29.57  | 24.99 | 2.37E-01 |
| cg26538140 | 5.51   | 2.39  | 2.09E-02 | 5.02   | 2.98  | 9.23E-02 | 11.13   | 5.88   | 5.81E-02 | 6.21   | 8.68  | 4.74E-01 | -0.06  | 6.89  | 9.93E-01 |
| cg13915277 | -9.59  | 4.15  | 2.09E-02 | -12.70 | 7.76  | 1.02E-01 | -8.68   | 9.82   | 3.77E-01 | -10.71 | 6.87  | 1.19E-01 | -2.89  | 10.10 | 7.74E-01 |
| cg07427211 | 13.43  | 5.81  | 2.09E-02 | 17.16  | 8.13  | 3.48E-02 | 14.52   | 11.52  | 2.08E-01 | 1.94   | 18.36 | 9.16E-01 | 5.67   | 15.90 | 7.21E-01 |
| cg24960291 | 10.12  | 4.38  | 2.09E-02 | 13.42  | 6.73  | 4.61E-02 | 15.44   | 10.36  | 1.36E-01 | 6.15   | 9.05  | 4.97E-01 | 1.37   | 10.88 | 8.99E-01 |
| cg15376097 | 10.35  | 4.48  | 2.09E-02 | 13.99  | 5.95  | 1.87E-02 | 5.40    | 10.08  | 5.92E-01 | -6.89  | 16.33 | 6.73E-01 | 11.70  | 11.22 | 2.97E-01 |
| cg19100464 | 21.76  | 9.42  | 2.09E-02 | 13.78  | 19.21 | 4.73E-01 | 24.48   | 20.47  | 2.32E-01 | 25.66  | 14.20 | 7.07E-02 | 18.25  | 28.75 | 5.26E-01 |
| cg05903710 | -17.94 | 7.77  | 2.09E-02 | -19.61 | 19.78 | 3.21E-01 | 28.17   | 28.13  | 3.17E-01 | -23.17 | 8.19  | 4.64E-03 | -10.74 | 28.88 | 7.10E-01 |
| cg03639864 | -15.41 | 6.67  | 2.09E-02 | -16.24 | 13.77 | 2.38E-01 | -1.98   | 27.19  | 9.42E-01 | -17.95 | 8.57  | 3.61E-02 | -5.94  | 21.25 | 7.80E-01 |
| cg06523618 | -10.83 | 4.69  | 2.09E-02 | -12.15 | 13.57 | 3.70E-01 | -16.75  | 14.36  | 2.43E-01 | -10.68 | 5.66  | 5.93E-02 | -3.02  | 15.81 | 8.48E-01 |
| cg20710902 | -11.42 | 4.95  | 2.09E-02 | -12.81 | 9.33  | 1.70E-01 | -1.16   | 12.20  | 9.24E-01 | -12.51 | 9.14  | 1.71E-01 | -15.16 | 9.67  | 1.17E-01 |
| cg03147461 | 12.71  | 5.50  | 2.09E-02 | -4.65  | 15.83 | 7.69E-01 | 36.03   | 19.62  | 6.63E-02 | 14.00  | 6.44  | 2.98E-02 | 3.08   | 20.67 | 8.82E-01 |
| cg16079364 | -8.80  | 3.81  | 2.09E-02 | -14.28 | 5.85  | 1.46E-02 | -0.63   | 8.76   | 9.42E-01 | -12.94 | 9.15  | 1.57E-01 | -1.75  | 8.28  | 8.33E-01 |
| cg07638105 | 25.89  | 11.21 | 2.09E-02 | 13.25  | 26.98 | 6.23E-01 | -6.04   | 63.10  | 9.24E-01 | 29.50  | 13.20 | 2.54E-02 | 33.83  | 41.17 | 4.11E-01 |
| cg24134020 | -15.76 | 6.83  | 2.09E-02 | -7.69  | 21.89 | 7.25E-01 | -47.87  | 52.17  | 3.59E-01 | -16.74 | 7.45  | 2.46E-02 | -2.81  | 32.01 | 9.30E-01 |
| cg26346167 | -8.12  | 3.52  | 2.10E-02 | -12.64 | 6.64  | 5.68E-02 | 7.57    | 10.69  | 4.78E-01 | -7.95  | 5.22  | 1.28E-01 | -11.36 | 8.88  | 2.00E-01 |
| cg22540067 | -9.27  | 4.02  | 2.10E-02 | -5.28  | 5.77  | 3.60E-01 | -12.94  | 8.96   | 1.49E-01 | -15.46 | 10.71 | 1.49E-01 | -11.16 | 9.63  | 2.47E-01 |

|            |        |       |          |         |       |          |        |        |          |        |       |          |         |       |          |
|------------|--------|-------|----------|---------|-------|----------|--------|--------|----------|--------|-------|----------|---------|-------|----------|
| cg10888644 | 19.89  | 8.62  | 2.10E-02 | 5.72    | 17.25 | 7.40E-01 | 21.03  | 22.80  | 3.56E-01 | 25.87  | 12.16 | 3.34E-02 | 23.45   | 26.50 | 3.76E-01 |
| cg27602263 | 19.65  | 8.51  | 2.10E-02 | 21.15   | 31.19 | 4.98E-01 | -29.12 | 78.21  | 7.10E-01 | 17.71  | 9.25  | 5.56E-02 | 50.82   | 32.75 | 1.21E-01 |
| cg09659400 | -10.14 | 4.39  | 2.10E-02 | -8.99   | 8.02  | 2.62E-01 | -13.80 | 10.25  | 1.78E-01 | -12.01 | 7.90  | 1.29E-01 | -5.79   | 9.62  | 5.48E-01 |
| cg00492083 | 20.96  | 9.08  | 2.10E-02 | 39.96   | 20.21 | 4.80E-02 | 35.79  | 19.80  | 7.07E-02 | 5.93   | 11.53 | 6.07E-01 | 30.92   | 26.52 | 2.44E-01 |
| cg10805736 | 23.60  | 10.22 | 2.10E-02 | 5.16    | 28.05 | 8.54E-01 | -14.45 | 151.71 | 9.24E-01 | 29.47  | 11.41 | 9.81E-03 | -11.18  | 41.70 | 7.89E-01 |
| cg25497530 | 19.26  | 8.34  | 2.10E-02 | 5.55    | 9.95  | 5.77E-01 | 31.69  | 13.71  | 2.09E-02 | 46.02  | 20.96 | 2.81E-02 | 13.01   | 13.46 | 3.34E-01 |
| cg22638105 | -19.65 | 8.51  | 2.10E-02 | -18.30  | 17.78 | 3.03E-01 | 3.02   | 19.77  | 8.79E-01 | -25.98 | 12.51 | 3.78E-02 | -32.68  | 24.39 | 1.80E-01 |
| cg15722533 | -10.74 | 4.65  | 2.10E-02 | -17.69  | 11.89 | 1.37E-01 | -3.96  | 22.99  | 8.63E-01 | -7.92  | 5.50  | 1.50E-01 | -24.21  | 15.39 | 1.16E-01 |
| cg01226265 | 24.42  | 10.58 | 2.10E-02 | 5.16    | 20.63 | 8.02E-01 | 18.29  | 31.86  | 5.66E-01 | 30.21  | 16.22 | 6.25E-02 | 40.70   | 23.57 | 8.42E-02 |
| cg10824972 | -10.44 | 4.52  | 2.10E-02 | -18.45  | 11.26 | 1.01E-01 | -17.84 | 23.88  | 4.55E-01 | -8.43  | 5.26  | 1.09E-01 | -9.36   | 18.00 | 6.03E-01 |
| cg26782169 | 15.37  | 6.66  | 2.10E-02 | 12.15   | 18.17 | 5.04E-01 | 28.00  | 24.95  | 2.62E-01 | 15.49  | 7.81  | 4.72E-02 | 7.03    | 25.73 | 7.85E-01 |
| cg26571618 | -34.34 | 14.88 | 2.10E-02 | -48.93  | 19.89 | 1.39E-02 | -17.93 | 45.03  | 6.91E-01 | -2.47  | 52.66 | 9.63E-01 | -19.11  | 29.67 | 5.19E-01 |
| cg24957476 | 43.73  | 18.95 | 2.10E-02 | 39.17   | 21.61 | 6.99E-02 | 14.99  | 108.45 | 8.90E-01 | 55.97  | 66.51 | 4.00E-01 | 72.05   | 54.78 | 1.88E-01 |
| cg01962510 | -40.09 | 17.37 | 2.10E-02 | -45.74  | 50.94 | 3.69E-01 | 107.35 | 212.72 | 6.14E-01 | -41.26 | 19.57 | 3.50E-02 | -33.42  | 58.09 | 5.65E-01 |
| cg17187595 | 36.22  | 15.69 | 2.10E-02 | 18.56   | 20.85 | 3.73E-01 | 36.73  | 81.76  | 6.53E-01 | 88.81  | 43.94 | 4.33E-02 | 48.40   | 30.25 | 1.10E-01 |
| cg16699326 | -33.21 | 14.39 | 2.10E-02 | -40.09  | 23.80 | 9.22E-02 | -44.49 | 73.12  | 5.43E-01 | -25.01 | 23.96 | 2.97E-01 | -33.23  | 29.65 | 2.62E-01 |
| cg05585556 | -17.03 | 7.38  | 2.10E-02 | -34.68  | 12.85 | 6.97E-03 | -7.87  | 20.21  | 6.97E-01 | -14.32 | 10.10 | 1.56E-01 | 3.68    | 19.53 | 8.51E-01 |
| cg07527467 | 17.39  | 7.53  | 2.10E-02 | 28.03   | 22.62 | 2.15E-01 | 35.86  | 26.54  | 1.77E-01 | 14.55  | 8.68  | 9.37E-02 | 7.80    | 31.93 | 8.07E-01 |
| cg08175640 | -10.36 | 4.49  | 2.10E-02 | -23.42  | 11.46 | 4.10E-02 | -6.46  | 17.53  | 7.12E-01 | -6.89  | 5.52  | 2.12E-01 | -14.91  | 12.97 | 2.50E-01 |
| cg01348055 | -15.89 | 6.89  | 2.10E-02 | -22.22  | 8.80  | 1.16E-02 | -5.07  | 13.89  | 7.15E-01 | 9.14   | 18.23 | 6.16E-01 | -26.38  | 11.58 | 2.28E-02 |
| cg23034827 | 14.50  | 6.28  | 2.10E-02 | 16.95   | 14.71 | 2.49E-01 | -6.18  | 15.89  | 6.97E-01 | 16.60  | 8.41  | 4.84E-02 | 30.00   | 19.49 | 1.24E-01 |
| cg05959277 | 22.27  | 9.65  | 2.10E-02 | 16.31   | 17.67 | 3.56E-01 | 17.02  | 36.82  | 6.44E-01 | 34.30  | 13.48 | 1.09E-02 | -11.08  | 27.76 | 6.90E-01 |
| cg23241878 | 30.45  | 13.20 | 2.10E-02 | 38.17   | 17.84 | 3.24E-02 | 47.77  | 43.83  | 2.76E-01 | -28.72 | 44.75 | 5.21E-01 | 28.11   | 25.15 | 2.64E-01 |
| cg24737618 | -78.57 | 34.04 | 2.10E-02 | -103.81 | 51.53 | 4.39E-02 | -89.15 | 270.81 | 7.42E-01 | -33.92 | 21.97 | 1.23E-01 | -169.34 | 67.38 | 1.20E-02 |
| cg23189692 | 5.96   | 2.58  | 2.10E-02 | 4.31    | 3.52  | 2.20E-01 | 11.14  | 5.62   | 4.73E-02 | 6.90   | 9.21  | 4.53E-01 | 4.30    | 6.23  | 4.89E-01 |
| cg23752086 | 21.25  | 9.21  | 2.10E-02 | 34.19   | 13.16 | 9.39E-03 | -0.05  | 21.55  | 9.98E-01 | 12.91  | 33.33 | 6.98E-01 | 14.07   | 18.36 | 4.43E-01 |
| cg19512903 | -9.38  | 4.07  | 2.10E-02 | -12.71  | 9.67  | 1.89E-01 | -0.48  | 12.23  | 9.68E-01 | -7.50  | 5.19  | 1.48E-01 | -24.90  | 12.88 | 5.32E-02 |
| cg23550757 | -36.88 | 15.98 | 2.10E-02 | -36.05  | 18.30 | 4.88E-02 | -96.67 | 105.25 | 3.58E-01 | -21.54 | 51.71 | 6.77E-01 | -42.93  | 46.43 | 3.55E-01 |
| cg00838829 | -18.81 | 8.15  | 2.10E-02 | -20.21  | 18.44 | 2.73E-01 | 56.48  | 50.11  | 2.60E-01 | -23.24 | 9.83  | 1.81E-02 | -4.17   | 27.03 | 8.77E-01 |
| cg07197230 | 7.23   | 3.13  | 2.10E-02 | 4.79    | 4.12  | 2.44E-01 | 11.51  | 7.58   | 1.29E-01 | 15.45  | 11.95 | 1.96E-01 | 7.87    | 7.37  | 2.85E-01 |
| cg20222052 | 30.72  | 13.31 | 2.10E-02 | 11.10   | 36.98 | 7.64E-01 | 96.49  | 152.22 | 5.26E-01 | 38.80  | 15.20 | 1.07E-02 | -13.07  | 43.16 | 7.62E-01 |
| cg01432120 | 12.51  | 5.42  | 2.10E-02 | 3.07    | 7.43  | 6.79E-01 | 25.59  | 13.01  | 4.92E-02 | 17.26  | 15.07 | 2.52E-01 | 19.81   | 10.94 | 7.01E-02 |
| cg20359349 | -7.10  | 3.08  | 2.11E-02 | -6.38   | 4.72  | 1.76E-01 | -3.54  | 6.59   | 5.91E-01 | -10.64 | 7.64  | 1.64E-01 | -9.70   | 6.98  | 1.65E-01 |
| cg12509665 | 8.66   | 3.75  | 2.11E-02 | 8.69    | 5.17  | 9.31E-02 | 13.24  | 8.78   | 1.32E-01 | 6.82   | 9.99  | 4.95E-01 | 4.71    | 9.69  | 6.26E-01 |
| cg04520420 | 22.01  | 9.54  | 2.11E-02 | 42.78   | 32.39 | 1.87E-01 | -9.93  | 102.82 | 9.23E-01 | 20.93  | 10.41 | 4.44E-02 | 12.43   | 37.49 | 7.40E-01 |

|            |        |       |          |        |       |          |         |        |          |         |       |          |        |       |          |
|------------|--------|-------|----------|--------|-------|----------|---------|--------|----------|---------|-------|----------|--------|-------|----------|
| cg05398769 | -15.17 | 6.58  | 2.11E-02 | -26.16 | 11.86 | 2.74E-02 | -4.68   | 12.02  | 6.97E-01 | -30.77  | 16.68 | 6.51E-02 | -5.38  | 12.53 | 6.67E-01 |
| cg04707519 | 6.42   | 2.78  | 2.11E-02 | 6.56   | 4.98  | 1.88E-01 | 7.60    | 5.82   | 1.92E-01 | 0.27    | 5.87  | 9.63E-01 | 10.99  | 5.75  | 5.61E-02 |
| cg07062336 | 9.35   | 4.05  | 2.11E-02 | 11.19  | 5.39  | 3.79E-02 | 14.21   | 9.55   | 1.37E-01 | 13.57   | 15.53 | 3.82E-01 | -2.43  | 9.36  | 7.95E-01 |
| cg24074594 | -10.64 | 4.61  | 2.11E-02 | -9.90  | 10.70 | 3.55E-01 | -16.76  | 25.75  | 5.15E-01 | -12.50  | 5.57  | 2.49E-02 | 3.04   | 14.78 | 8.37E-01 |
| cg24985060 | 27.01  | 11.71 | 2.11E-02 | 7.43   | 25.44 | 7.70E-01 | -1.88   | 62.07  | 9.76E-01 | 38.91   | 14.57 | 7.58E-03 | 3.57   | 35.78 | 9.21E-01 |
| cg15651204 | -26.04 | 11.29 | 2.11E-02 | -32.90 | 16.19 | 4.21E-02 | -4.73   | 35.42  | 8.94E-01 | -26.01  | 24.60 | 2.90E-01 | -20.28 | 25.18 | 4.21E-01 |
| cg14779404 | -9.90  | 4.29  | 2.11E-02 | -6.89  | 8.28  | 4.06E-01 | -12.03  | 11.89  | 3.12E-01 | -13.02  | 6.44  | 4.31E-02 | -4.43  | 10.84 | 6.82E-01 |
| cg04469059 | 22.17  | 9.61  | 2.11E-02 | 33.99  | 13.89 | 1.44E-02 | 21.49   | 40.65  | 5.97E-01 | 13.22   | 27.66 | 6.33E-01 | 8.99   | 16.38 | 5.83E-01 |
| cg13692972 | 4.95   | 2.15  | 2.11E-02 | 2.96   | 2.82  | 2.94E-01 | 8.72    | 5.04   | 8.38E-02 | 9.12    | 5.51  | 9.80E-02 | 3.13   | 7.35  | 6.70E-01 |
| cg19888344 | -19.09 | 8.28  | 2.11E-02 | -4.74  | 19.39 | 8.07E-01 | -32.74  | 42.40  | 4.40E-01 | -23.77  | 10.02 | 1.77E-02 | -7.85  | 26.45 | 7.67E-01 |
| cg08015388 | -48.62 | 21.08 | 2.11E-02 | -51.93 | 19.53 | 7.83E-03 | 39.99   | 52.02  | 4.42E-01 | -103.55 | 28.64 | 3.00E-04 | -34.81 | 23.31 | 1.35E-01 |
| cg15202627 | 19.54  | 8.47  | 2.11E-02 | -3.32  | 22.21 | 8.81E-01 | 0.94    | 69.60  | 9.89E-01 | 21.11   | 9.93  | 3.36E-02 | 41.39  | 25.27 | 1.01E-01 |
| cg02553070 | -19.82 | 8.59  | 2.11E-02 | -21.67 | 11.70 | 6.40E-02 | -9.53   | 21.55  | 6.58E-01 | -43.90  | 34.79 | 2.07E-01 | -16.36 | 17.52 | 3.50E-01 |
| cg20629551 | -11.61 | 5.03  | 2.11E-02 | -19.54 | 13.56 | 1.50E-01 | -2.33   | 19.75  | 9.06E-01 | -10.30  | 6.04  | 8.83E-02 | -15.68 | 15.69 | 3.18E-01 |
| cg06575288 | 16.74  | 7.26  | 2.11E-02 | 10.10  | 10.60 | 3.41E-01 | 18.97   | 34.18  | 5.79E-01 | 34.41   | 22.53 | 1.27E-01 | 19.84  | 11.75 | 9.13E-02 |
| cg27426340 | 19.43  | 8.43  | 2.11E-02 | 28.29  | 17.00 | 9.59E-02 | 21.77   | 13.91  | 1.18E-01 | 8.58    | 18.37 | 6.40E-01 | 15.17  | 20.03 | 4.49E-01 |
| cg08130265 | 6.53   | 2.83  | 2.11E-02 | 4.33   | 3.77  | 2.52E-01 | 14.94   | 6.79   | 2.78E-02 | 9.76    | 7.79  | 2.10E-01 | 1.55   | 7.86  | 8.44E-01 |
| cg17345741 | -12.65 | 5.49  | 2.11E-02 | -15.12 | 8.59  | 7.83E-02 | 2.74    | 13.78  | 8.42E-01 | -14.73  | 11.10 | 1.85E-01 | -17.55 | 12.62 | 1.64E-01 |
| cg11110643 | 26.13  | 11.33 | 2.11E-02 | 29.35  | 20.19 | 1.46E-01 | 23.04   | 31.37  | 4.63E-01 | 32.04   | 18.80 | 8.84E-02 | 11.72  | 25.93 | 6.51E-01 |
| cg11510891 | 18.38  | 7.97  | 2.11E-02 | 21.56  | 13.27 | 1.04E-01 | 31.74   | 15.17  | 3.64E-02 | 17.32   | 20.81 | 4.05E-01 | -3.24  | 17.13 | 8.50E-01 |
| cg22935609 | -12.51 | 5.43  | 2.11E-02 | -28.65 | 10.50 | 6.39E-03 | -5.68   | 14.28  | 6.91E-01 | -6.61   | 7.11  | 3.52E-01 | -11.39 | 13.99 | 4.16E-01 |
| cg03313126 | -13.29 | 5.77  | 2.11E-02 | -9.46  | 9.63  | 3.26E-01 | -1.76   | 13.81  | 8.99E-01 | -20.83  | 10.48 | 4.70E-02 | -20.01 | 14.21 | 1.59E-01 |
| cg10185885 | 41.19  | 17.87 | 2.12E-02 | 30.91  | 20.17 | 1.25E-01 | -95.15  | 128.63 | 4.60E-01 | 125.21  | 67.01 | 6.17E-02 | 55.61  | 34.88 | 1.11E-01 |
| cg19103219 | 11.24  | 4.88  | 2.12E-02 | 4.74   | 6.33  | 4.54E-01 | 18.12   | 9.43   | 5.48E-02 | 23.63   | 9.44  | 1.23E-02 | 3.28   | 9.56  | 7.32E-01 |
| cg11158239 | 23.33  | 10.12 | 2.12E-02 | 21.96  | 12.95 | 8.99E-02 | 20.80   | 41.00  | 6.12E-01 | 38.65   | 52.46 | 4.61E-01 | 24.78  | 18.77 | 1.87E-01 |
| cg26789698 | -13.28 | 5.76  | 2.12E-02 | -22.33 | 9.23  | 1.56E-02 | -6.79   | 12.65  | 5.92E-01 | -10.52  | 12.04 | 3.82E-01 | -4.42  | 13.80 | 7.49E-01 |
| cg21025494 | 17.41  | 7.55  | 2.12E-02 | 22.62  | 11.25 | 4.44E-02 | 17.46   | 19.33  | 3.66E-01 | 40.24   | 21.89 | 6.60E-02 | -0.87  | 14.33 | 9.52E-01 |
| cg12844324 | 8.20   | 3.56  | 2.12E-02 | 8.63   | 5.15  | 9.41E-02 | 4.96    | 6.87   | 4.70E-01 | 13.97   | 11.22 | 2.13E-01 | 8.74   | 9.05  | 3.35E-01 |
| cg16846645 | 10.31  | 4.48  | 2.12E-02 | 19.77  | 8.81  | 2.49E-02 | 1.83    | 11.04  | 8.68E-01 | 15.25   | 8.64  | 7.75E-02 | 2.65   | 8.05  | 7.42E-01 |
| cg14014604 | -36.95 | 16.03 | 2.12E-02 | -18.88 | 39.94 | 6.36E-01 | -6.36   | 158.67 | 9.68E-01 | -46.89  | 18.50 | 1.13E-02 | 17.61  | 57.54 | 7.60E-01 |
| cg00339769 | 14.19  | 6.16  | 2.12E-02 | 16.30  | 8.53  | 5.60E-02 | 27.47   | 15.23  | 7.12E-02 | 13.43   | 16.45 | 4.14E-01 | -3.91  | 14.73 | 7.91E-01 |
| cg16905586 | 26.75  | 11.61 | 2.12E-02 | 9.13   | 19.11 | 6.33E-01 | 27.67   | 31.90  | 3.86E-01 | 46.40   | 20.36 | 2.27E-02 | 26.69  | 27.83 | 3.37E-01 |
| cg20196129 | 21.06  | 9.14  | 2.12E-02 | 11.50  | 24.10 | 6.33E-01 | -77.75  | 79.00  | 3.25E-01 | 22.76   | 10.35 | 2.78E-02 | 43.10  | 36.59 | 2.39E-01 |
| cg26888225 | -48.40 | 21.00 | 2.12E-02 | 4.72   | 52.66 | 9.29E-01 | -114.63 | 240.80 | 6.34E-01 | -57.05  | 24.39 | 1.93E-02 | -65.14 | 69.31 | 3.47E-01 |
| cg24011531 | 37.82  | 16.41 | 2.12E-02 | 61.56  | 44.52 | 1.67E-01 | -111.53 | 176.11 | 5.27E-01 | 29.76   | 18.45 | 1.07E-01 | 106.38 | 64.50 | 9.90E-02 |

|            |        |       |          |        |       |          |         |        |          |         |        |          |         |       |          |
|------------|--------|-------|----------|--------|-------|----------|---------|--------|----------|---------|--------|----------|---------|-------|----------|
| cg08358907 | 8.32   | 3.61  | 2.12E-02 | 5.36   | 4.67  | 2.50E-01 | 19.14   | 8.50   | 2.43E-02 | 5.22    | 12.66  | 6.80E-01 | 8.84    | 9.69  | 3.62E-01 |
| cg24133591 | 25.16  | 10.92 | 2.12E-02 | 5.22   | 31.27 | 8.68E-01 | 23.65   | 100.30 | 8.14E-01 | 30.26   | 12.83  | 1.84E-02 | 16.41   | 28.97 | 5.71E-01 |
| cg07303548 | 11.97  | 5.20  | 2.12E-02 | 4.83   | 7.44  | 5.16E-01 | 23.58   | 11.18  | 3.49E-02 | 7.05    | 15.77  | 6.55E-01 | 19.99   | 11.98 | 9.53E-02 |
| cg14712186 | 29.28  | 12.71 | 2.12E-02 | 38.86  | 35.67 | 2.76E-01 | 35.96   | 54.63  | 5.10E-01 | 16.52   | 8.70   | 5.76E-02 | 70.50   | 27.83 | 1.13E-02 |
| cg16783517 | 51.39  | 22.30 | 2.12E-02 | 56.77  | 28.08 | 4.32E-02 | 52.31   | 59.27  | 3.78E-01 | -41.45  | 58.88  | 4.81E-01 | 89.88   | 41.48 | 3.03E-02 |
| cg27262735 | 15.53  | 6.74  | 2.12E-02 | 26.02  | 13.05 | 4.62E-02 | 49.17   | 32.79  | 1.34E-01 | 7.68    | 9.06   | 3.97E-01 | 16.44   | 18.16 | 3.65E-01 |
| cg20430841 | 10.08  | 4.37  | 2.12E-02 | 8.57   | 5.61  | 1.27E-01 | 20.11   | 11.63  | 8.38E-02 | -4.86   | 19.93  | 8.07E-01 | 11.12   | 9.70  | 2.52E-01 |
| cg08007465 | 22.31  | 9.68  | 2.12E-02 | 31.70  | 14.44 | 2.82E-02 | 10.60   | 30.08  | 7.25E-01 | 24.54   | 28.29  | 3.86E-01 | 12.39   | 16.87 | 4.63E-01 |
| cg22331862 | 11.78  | 5.11  | 2.12E-02 | 13.50  | 7.87  | 8.65E-02 | 8.40    | 10.96  | 4.44E-01 | 13.22   | 14.26  | 3.54E-01 | 11.02   | 10.60 | 2.98E-01 |
| cg10287137 | 8.35   | 3.62  | 2.12E-02 | 7.48   | 4.63  | 1.06E-01 | 11.89   | 9.54   | 2.13E-01 | 16.69   | 9.68   | 8.45E-02 | -2.97   | 11.39 | 7.94E-01 |
| cg17125477 | 31.32  | 13.59 | 2.12E-02 | 44.75  | 36.94 | 2.26E-01 | 18.69   | 97.96  | 8.49E-01 | 28.28   | 16.15  | 8.00E-02 | 35.52   | 36.72 | 3.33E-01 |
| cg26227242 | -45.32 | 19.67 | 2.12E-02 | -52.72 | 24.55 | 3.18E-02 | 39.96   | 70.26  | 5.70E-01 | -153.07 | 114.53 | 1.81E-01 | -40.35  | 39.35 | 3.05E-01 |
| cg16118803 | -5.29  | 2.30  | 2.12E-02 | -7.58  | 3.15  | 1.60E-02 | -3.92   | 5.90   | 5.07E-01 | -1.41   | 6.88   | 8.38E-01 | -2.47   | 5.09  | 6.28E-01 |
| cg02598564 | -13.24 | 5.75  | 2.12E-02 | -11.83 | 9.54  | 2.15E-01 | -10.98  | 12.94  | 3.96E-01 | -16.20  | 11.96  | 1.76E-01 | -14.58  | 12.59 | 2.47E-01 |
| cg04453552 | -38.17 | 16.57 | 2.12E-02 | -27.37 | 27.79 | 3.25E-01 | 114.29  | 117.93 | 3.32E-01 | -73.97  | 37.52  | 4.87E-02 | -37.86  | 25.28 | 1.34E-01 |
| cg18388559 | 19.83  | 8.61  | 2.13E-02 | 8.92   | 12.25 | 4.67E-01 | 41.29   | 14.40  | 4.14E-03 | 21.91   | 22.91  | 3.39E-01 | 7.06    | 18.61 | 7.04E-01 |
| cg15247645 | -29.02 | 12.60 | 2.13E-02 | -85.25 | 36.41 | 1.92E-02 | -12.63  | 215.77 | 9.53E-01 | -22.01  | 13.91  | 1.13E-01 | -12.46  | 53.28 | 8.15E-01 |
| cg26688936 | -75.30 | 32.69 | 2.13E-02 | -39.19 | 41.07 | 3.40E-01 | 38.45   | 116.79 | 7.42E-01 | -96.42  | 49.32  | 5.06E-02 | -173.05 | 73.35 | 1.83E-02 |
| cg01687558 | -40.53 | 17.60 | 2.13E-02 | -41.20 | 22.21 | 6.36E-02 | 85.57   | 110.79 | 4.40E-01 | -74.44  | 43.84  | 8.96E-02 | -26.00  | 40.79 | 5.24E-01 |
| cg23158754 | 12.18  | 5.29  | 2.13E-02 | 12.95  | 7.56  | 8.65E-02 | 19.68   | 13.18  | 1.35E-01 | 14.16   | 19.41  | 4.66E-01 | 5.88    | 10.10 | 5.60E-01 |
| cg05422957 | 27.80  | 12.07 | 2.13E-02 | 38.88  | 16.31 | 1.72E-02 | -14.35  | 42.49  | 7.35E-01 | 28.62   | 30.78  | 3.52E-01 | 15.02   | 25.84 | 5.61E-01 |
| cg21086066 | -34.88 | 15.14 | 2.13E-02 | -24.38 | 47.40 | 6.07E-01 | 183.12  | 180.58 | 3.11E-01 | -34.20  | 16.94  | 4.35E-02 | -68.98  | 49.87 | 1.67E-01 |
| cg18931014 | -16.04 | 6.96  | 2.13E-02 | -10.34 | 13.42 | 4.41E-01 | 5.83    | 41.85  | 8.89E-01 | -18.47  | 8.88   | 3.75E-02 | -23.35  | 23.46 | 3.20E-01 |
| cg05757448 | -18.91 | 8.21  | 2.13E-02 | -26.99 | 10.72 | 1.18E-02 | 9.97    | 21.14  | 6.37E-01 | -33.69  | 15.14  | 2.60E-02 | -8.71   | 14.01 | 5.34E-01 |
| cg05034374 | -25.09 | 10.89 | 2.13E-02 | -45.64 | 20.79 | 2.81E-02 | 15.53   | 36.37  | 6.69E-01 | -31.34  | 10.47  | 2.75E-03 | 3.29    | 25.24 | 8.96E-01 |
| cg24211006 | -6.39  | 2.77  | 2.13E-02 | -5.45  | 4.71  | 2.47E-01 | -6.10   | 5.03   | 2.25E-01 | -1.72   | 7.70   | 8.23E-01 | -11.02  | 5.92  | 6.27E-02 |
| cg25790365 | 7.38   | 3.20  | 2.13E-02 | 7.39   | 5.85  | 2.07E-01 | 8.33    | 9.11   | 3.60E-01 | 7.37    | 4.60   | 1.09E-01 | 6.09    | 10.62 | 5.66E-01 |
| cg00744791 | -9.49  | 4.12  | 2.13E-02 | -11.05 | 5.96  | 6.37E-02 | -2.02   | 9.89   | 8.38E-01 | 9.65    | 16.22  | 5.52E-01 | -15.75  | 7.72  | 4.14E-02 |
| cg24492694 | -30.51 | 13.25 | 2.13E-02 | -27.56 | 20.52 | 1.79E-01 | 3.65    | 58.15  | 9.50E-01 | -48.35  | 29.04  | 9.59E-02 | -28.32  | 23.31 | 2.24E-01 |
| cg11855842 | -16.49 | 7.16  | 2.13E-02 | -15.54 | 10.13 | 1.25E-01 | -13.24  | 18.50  | 4.74E-01 | -30.81  | 17.94  | 8.60E-02 | -9.61   | 16.38 | 5.57E-01 |
| cg00750402 | -44.83 | 19.47 | 2.13E-02 | -35.57 | 24.67 | 1.49E-01 | -107.20 | 64.81  | 9.81E-02 | 14.76   | 74.23  | 8.42E-01 | -64.29  | 41.68 | 1.23E-01 |
| cg11374368 | 9.37   | 4.07  | 2.13E-02 | 16.72  | 6.62  | 1.15E-02 | 1.13    | 10.08  | 9.11E-01 | 2.33    | 8.83   | 7.92E-01 | 9.64    | 8.20  | 2.40E-01 |
| cg24860819 | -31.91 | 13.85 | 2.13E-02 | -23.29 | 19.40 | 2.30E-01 | -3.02   | 37.09  | 9.35E-01 | -27.83  | 41.70  | 5.05E-01 | -68.90  | 28.29 | 1.49E-02 |
| cg18758987 | -14.13 | 6.14  | 2.13E-02 | -23.23 | 11.69 | 4.69E-02 | -9.31   | 15.23  | 5.41E-01 | -8.52   | 9.65   | 3.77E-01 | -17.63  | 15.47 | 2.55E-01 |
| cg14838248 | 6.70   | 2.91  | 2.13E-02 | 4.52   | 6.06  | 4.56E-01 | -1.78   | 9.84   | 8.56E-01 | 9.32    | 3.76   | 1.31E-02 | 2.69    | 10.20 | 7.92E-01 |

|            |        |       |          |        |       |          |        |        |          |        |       |          |        |       |          |
|------------|--------|-------|----------|--------|-------|----------|--------|--------|----------|--------|-------|----------|--------|-------|----------|
| cg27145409 | 39.85  | 17.30 | 2.13E-02 | 11.51  | 13.05 | 3.78E-01 | 76.92  | 45.13  | 8.83E-02 | 89.65  | 36.83 | 1.49E-02 | 38.81  | 20.33 | 5.63E-02 |
| cg02088166 | 24.31  | 10.56 | 2.13E-02 | 18.15  | 17.58 | 3.02E-01 | 39.33  | 22.90  | 8.59E-02 | 26.05  | 22.15 | 2.40E-01 | 17.47  | 23.60 | 4.59E-01 |
| cg14948448 | -16.64 | 7.23  | 2.13E-02 | 3.67   | 21.18 | 8.63E-01 | -52.28 | 27.59  | 5.81E-02 | -17.39 | 8.27  | 3.54E-02 | -3.78  | 31.96 | 9.06E-01 |
| cg19570596 | 27.55  | 11.97 | 2.13E-02 | 19.87  | 32.23 | 5.38E-01 | -76.11 | 144.92 | 5.99E-01 | 25.71  | 13.63 | 5.94E-02 | 65.08  | 41.05 | 1.13E-01 |
| cg03900241 | -11.28 | 4.90  | 2.13E-02 | -24.69 | 10.51 | 1.88E-02 | 14.59  | 20.63  | 4.79E-01 | -10.19 | 5.03  | 4.30E-02 | -7.13  | 13.52 | 5.98E-01 |
| cg03031868 | 27.43  | 11.91 | 2.13E-02 | 29.42  | 13.64 | 3.10E-02 | 79.32  | 46.17  | 8.58E-02 | 11.45  | 70.48 | 8.71E-01 | -4.32  | 31.57 | 8.91E-01 |
| cg11400761 | 26.12  | 11.34 | 2.13E-02 | 52.35  | 16.07 | 1.13E-03 | -6.56  | 24.19  | 7.86E-01 | 17.92  | 6.70  | 7.51E-03 | 40.61  | 26.13 | 1.20E-01 |
| cg13134950 | -18.20 | 7.91  | 2.13E-02 | -17.94 | 12.28 | 1.44E-01 | 1.93   | 17.28  | 9.11E-01 | -34.60 | 18.14 | 5.65E-02 | -24.70 | 18.33 | 1.78E-01 |
| cg01075559 | 18.78  | 8.16  | 2.13E-02 | 16.52  | 20.06 | 4.10E-01 | 15.91  | 17.79  | 3.71E-01 | 13.60  | 11.13 | 2.22E-01 | 61.52  | 27.51 | 2.53E-02 |
| cg05269432 | -15.08 | 6.55  | 2.13E-02 | -21.90 | 19.38 | 2.58E-01 | 5.73   | 26.83  | 8.31E-01 | -14.13 | 7.43  | 5.73E-02 | -39.95 | 29.72 | 1.79E-01 |
| cg24631735 | -10.26 | 4.46  | 2.13E-02 | -13.95 | 11.55 | 2.27E-01 | -8.64  | 20.83  | 6.78E-01 | -9.14  | 5.33  | 8.61E-02 | -13.20 | 13.74 | 3.37E-01 |
| cg27300494 | -9.90  | 4.30  | 2.13E-02 | -16.97 | 8.16  | 3.76E-02 | 1.44   | 9.72   | 8.82E-01 | -13.20 | 8.24  | 1.09E-01 | -7.36  | 8.51  | 3.87E-01 |
| cg16024904 | 12.94  | 5.62  | 2.13E-02 | -6.88  | 16.67 | 6.80E-01 | 36.83  | 34.03  | 2.79E-01 | 15.51  | 6.90  | 2.46E-02 | 12.43  | 12.73 | 3.29E-01 |
| cg14781281 | 13.81  | 6.00  | 2.13E-02 | 0.05   | 15.95 | 9.97E-01 | 24.67  | 24.44  | 3.13E-01 | 15.61  | 7.85  | 4.67E-02 | 14.92  | 12.95 | 2.49E-01 |
| cg15598120 | -19.49 | 8.46  | 2.13E-02 | -18.70 | 10.70 | 8.03E-02 | -37.64 | 19.17  | 4.96E-02 | 14.78  | 22.07 | 5.03E-01 | -26.87 | 15.70 | 8.70E-02 |
| cg16295030 | -8.36  | 3.63  | 2.13E-02 | -13.26 | 8.04  | 9.92E-02 | -11.78 | 13.47  | 3.82E-01 | -7.98  | 4.75  | 9.28E-02 | -0.94  | 9.79  | 9.24E-01 |
| cg02167986 | -11.31 | 4.91  | 2.13E-02 | -17.08 | 13.96 | 2.21E-01 | -21.75 | 30.25  | 4.72E-01 | -10.92 | 5.70  | 5.51E-02 | -4.68  | 15.07 | 7.56E-01 |
| cg09241243 | -40.22 | 17.47 | 2.13E-02 | -8.34  | 51.29 | 8.71E-01 | -85.26 | 203.43 | 6.75E-01 | -45.18 | 19.61 | 2.12E-02 | -33.31 | 60.77 | 5.84E-01 |
| cg00116463 | 29.23  | 12.70 | 2.13E-02 | 38.86  | 22.89 | 8.95E-02 | -26.14 | 73.92  | 7.24E-01 | 18.94  | 17.75 | 2.86E-01 | 55.36  | 32.71 | 9.05E-02 |
| cg25905674 | 57.29  | 24.89 | 2.13E-02 | 60.63  | 38.68 | 1.17E-01 | -42.01 | 145.78 | 7.73E-01 | 30.65  | 15.16 | 4.33E-02 | 127.24 | 42.68 | 2.87E-03 |
| cg08322205 | 20.49  | 8.90  | 2.14E-02 | 15.19  | 24.82 | 5.40E-01 | 36.83  | 121.34 | 7.61E-01 | 24.16  | 10.38 | 1.99E-02 | 4.35   | 24.66 | 8.60E-01 |
| cg10975391 | -11.63 | 5.05  | 2.14E-02 | -16.11 | 8.97  | 7.25E-02 | -8.60  | 12.37  | 4.87E-01 | -11.35 | 9.02  | 2.08E-01 | -7.54  | 11.25 | 5.03E-01 |
| cg19671648 | -14.09 | 6.12  | 2.14E-02 | -23.28 | 14.74 | 1.14E-01 | 15.10  | 22.57  | 5.04E-01 | -17.01 | 6.15  | 5.67E-03 | 9.43   | 24.27 | 6.98E-01 |
| cg22147539 | 27.51  | 11.95 | 2.14E-02 | 45.81  | 27.17 | 9.18E-02 | -25.08 | 119.78 | 8.34E-01 | 29.96  | 14.12 | 3.39E-02 | -31.93 | 42.18 | 4.49E-01 |
| cg26346104 | -38.35 | 16.66 | 2.14E-02 | -49.42 | 21.35 | 2.06E-02 | -49.99 | 99.33  | 6.15E-01 | -59.84 | 76.80 | 4.36E-01 | -12.75 | 29.66 | 6.67E-01 |
| cg00760938 | -14.82 | 6.44  | 2.14E-02 | -23.87 | 10.56 | 2.39E-02 | -8.36  | 19.12  | 6.62E-01 | -13.45 | 10.50 | 2.00E-01 | 0.42   | 17.30 | 9.81E-01 |
| cg06551493 | 9.18   | 3.99  | 2.14E-02 | 11.72  | 7.63  | 1.24E-01 | -19.95 | 20.42  | 3.29E-01 | 7.87   | 5.37  | 1.43E-01 | 17.61  | 10.83 | 1.04E-01 |
| cg00019275 | -9.85  | 4.28  | 2.14E-02 | -16.31 | 8.80  | 6.38E-02 | -8.62  | 12.94  | 5.06E-01 | -5.55  | 6.03  | 3.57E-01 | -15.00 | 11.05 | 1.75E-01 |
| cg22272492 | 21.77  | 9.46  | 2.14E-02 | 29.64  | 17.84 | 9.65E-02 | 16.34  | 19.22  | 3.95E-01 | 18.01  | 15.92 | 2.58E-01 | 25.22  | 26.90 | 3.49E-01 |
| cg02239453 | -8.45  | 3.67  | 2.14E-02 | -15.67 | 7.23  | 3.03E-02 | -4.51  | 14.81  | 7.61E-01 | -3.11  | 5.07  | 5.40E-01 | -15.97 | 9.27  | 8.49E-02 |
| cg18117228 | 19.30  | 8.39  | 2.14E-02 | 5.81   | 20.55 | 7.77E-01 | -19.08 | 63.02  | 7.62E-01 | 22.23  | 9.78  | 2.30E-02 | 28.96  | 29.61 | 3.28E-01 |
| cg25104397 | 8.16   | 3.55  | 2.14E-02 | 9.75   | 5.08  | 5.48E-02 | 14.08  | 8.97   | 1.16E-01 | 5.67   | 8.05  | 4.82E-01 | 0.65   | 8.80  | 9.41E-01 |
| cg01124575 | -8.77  | 3.81  | 2.14E-02 | -16.40 | 6.45  | 1.10E-02 | -3.62  | 9.34   | 6.98E-01 | -7.52  | 6.40  | 2.40E-01 | 1.84   | 10.65 | 8.62E-01 |
| cg13407464 | -21.12 | 9.18  | 2.14E-02 | -15.91 | 13.52 | 2.39E-01 | -0.45  | 26.34  | 9.87E-01 | -27.30 | 24.31 | 2.61E-01 | -35.78 | 17.50 | 4.09E-02 |
| cg14737571 | -18.70 | 8.13  | 2.14E-02 | -38.73 | 18.63 | 3.76E-02 | -28.64 | 40.06  | 4.75E-01 | -16.59 | 9.92  | 9.43E-02 | 10.16  | 26.06 | 6.97E-01 |

|            |        |       |          |        |       |          |        |        |          |        |       |          |        |       |          |
|------------|--------|-------|----------|--------|-------|----------|--------|--------|----------|--------|-------|----------|--------|-------|----------|
| cg18378453 | 18.50  | 8.04  | 2.14E-02 | 52.87  | 29.73 | 7.54E-02 | -36.64 | 70.05  | 6.01E-01 | 17.28  | 8.69  | 4.67E-02 | 5.57   | 33.59 | 8.68E-01 |
| cg06365535 | 12.27  | 5.33  | 2.14E-02 | 12.21  | 9.60  | 2.03E-01 | 21.18  | 12.72  | 9.58E-02 | 12.10  | 12.90 | 3.48E-01 | 7.86   | 9.08  | 3.87E-01 |
| cg07211050 | -27.39 | 11.90 | 2.14E-02 | -26.77 | 14.95 | 7.33E-02 | 56.14  | 212.48 | 7.92E-01 | -44.36 | 22.91 | 5.28E-02 | 14.93  | 39.06 | 7.02E-01 |
| cg00630958 | 15.29  | 6.65  | 2.14E-02 | 29.62  | 9.39  | 1.60E-03 | 14.28  | 14.20  | 3.15E-01 | 17.31  | 10.15 | 8.82E-02 | 1.45   | 8.38  | 8.63E-01 |
| cg04637506 | -10.82 | 4.70  | 2.14E-02 | -15.96 | 11.71 | 1.73E-01 | -8.62  | 9.73   | 3.75E-01 | -6.48  | 7.18  | 3.67E-01 | -19.51 | 11.17 | 8.08E-02 |
| cg04872541 | -8.31  | 3.61  | 2.14E-02 | -8.43  | 5.38  | 1.17E-01 | -18.09 | 8.28   | 2.89E-02 | -4.24  | 9.80  | 6.66E-01 | -2.22  | 7.62  | 7.71E-01 |
| cg06757357 | 22.83  | 9.92  | 2.14E-02 | 25.91  | 16.61 | 1.19E-01 | 19.60  | 24.70  | 4.28E-01 | 19.05  | 18.64 | 3.07E-01 | 25.31  | 22.26 | 2.56E-01 |
| cg17239008 | 4.04   | 1.75  | 2.14E-02 | 3.65   | 2.42  | 1.32E-01 | 4.47   | 3.32   | 1.79E-01 | 2.47   | 9.16  | 7.88E-01 | 4.92   | 4.39  | 2.62E-01 |
| cg05726764 | 5.37   | 2.34  | 2.14E-02 | 3.82   | 3.28  | 2.44E-01 | 8.00   | 4.34   | 6.50E-02 | 16.66  | 9.50  | 7.94E-02 | 0.78   | 6.15  | 8.99E-01 |
| cg25384556 | -9.83  | 4.27  | 2.14E-02 | -7.36  | 6.88  | 2.85E-01 | -5.04  | 10.39  | 6.28E-01 | -11.98 | 9.82  | 2.22E-01 | -15.13 | 8.45  | 7.34E-02 |
| cg11692852 | 19.32  | 8.40  | 2.14E-02 | 13.71  | 14.49 | 3.44E-01 | 54.21  | 25.00  | 3.02E-02 | 22.54  | 16.48 | 1.71E-01 | 9.42   | 15.55 | 5.45E-01 |
| cg10982275 | 22.33  | 9.71  | 2.14E-02 | 6.70   | 17.49 | 7.02E-01 | 11.15  | 19.83  | 5.74E-01 | 38.03  | 17.66 | 3.13E-02 | 40.65  | 25.05 | 1.05E-01 |
| cg15660684 | -44.50 | 19.34 | 2.14E-02 | -34.93 | 27.17 | 1.98E-01 | -7.26  | 76.96  | 9.25E-01 | -65.15 | 43.85 | 1.37E-01 | -58.06 | 39.89 | 1.46E-01 |
| cg06245989 | 10.48  | 4.55  | 2.14E-02 | 13.82  | 6.48  | 3.28E-02 | 17.77  | 11.97  | 1.38E-01 | 9.24   | 10.89 | 3.96E-01 | -2.95  | 10.57 | 7.80E-01 |
| cg11805463 | -9.65  | 4.19  | 2.14E-02 | -3.23  | 9.65  | 7.38E-01 | -4.36  | 12.44  | 7.26E-01 | -11.40 | 5.48  | 3.75E-02 | -16.68 | 12.54 | 1.83E-01 |
| cg03508063 | 14.05  | 6.11  | 2.14E-02 | 11.60  | 7.71  | 1.32E-01 | 32.91  | 12.56  | 8.81E-03 | -0.88  | 13.38 | 9.48E-01 | 13.85  | 13.55 | 3.07E-01 |
| cg08575249 | 16.89  | 7.34  | 2.14E-02 | 34.16  | 12.09 | 4.74E-03 | 9.20   | 12.86  | 4.74E-01 | 4.19   | 12.87 | 7.45E-01 | 19.62  | 20.59 | 3.41E-01 |
| cg00785192 | 17.75  | 7.72  | 2.14E-02 | 17.22  | 15.26 | 2.59E-01 | 40.18  | 47.98  | 4.02E-01 | 19.01  | 9.72  | 5.06E-02 | 3.75   | 25.93 | 8.85E-01 |
| cg20122925 | 21.93  | 9.53  | 2.14E-02 | 10.74  | 28.97 | 7.11E-01 | 17.84  | 58.00  | 7.58E-01 | 22.87  | 10.97 | 3.71E-02 | 27.47  | 28.76 | 3.39E-01 |
| cg26885400 | 8.27   | 3.60  | 2.14E-02 | 5.81   | 4.98  | 2.43E-01 | 16.52  | 8.26   | 4.55E-02 | 16.32  | 9.87  | 9.82E-02 | -0.33  | 9.06  | 9.71E-01 |
| cg17566541 | 8.64   | 3.76  | 2.14E-02 | 9.46   | 4.84  | 5.03E-02 | 6.56   | 7.91   | 4.06E-01 | 16.66  | 12.58 | 1.85E-01 | -0.47  | 13.15 | 9.72E-01 |
| cg06080169 | -12.67 | 5.51  | 2.14E-02 | -14.50 | 10.04 | 1.49E-01 | -0.97  | 13.82  | 9.44E-01 | -15.37 | 9.14  | 9.28E-02 | -14.54 | 13.10 | 2.67E-01 |
| cg14338548 | -20.22 | 8.79  | 2.14E-02 | -46.65 | 22.19 | 3.55E-02 | 10.61  | 47.38  | 8.23E-01 | -18.02 | 10.22 | 7.78E-02 | 1.24   | 33.80 | 9.71E-01 |
| cg26696685 | 38.36  | 16.68 | 2.14E-02 | 37.05  | 19.70 | 6.00E-02 | 77.09  | 75.18  | 3.05E-01 | 47.89  | 49.59 | 3.34E-01 | 21.41  | 47.95 | 6.55E-01 |
| cg09729166 | 19.35  | 8.41  | 2.14E-02 | 9.52   | 15.67 | 5.43E-01 | 22.59  | 16.85  | 1.80E-01 | 16.91  | 15.71 | 2.82E-01 | 34.93  | 20.10 | 8.23E-02 |
| cg07375836 | 5.36   | 2.33  | 2.15E-02 | 4.05   | 3.36  | 2.28E-01 | 8.18   | 6.99   | 2.42E-01 | 9.02   | 4.48  | 4.40E-02 | 0.41   | 6.33  | 9.48E-01 |
| cg02296931 | 10.62  | 4.62  | 2.15E-02 | 15.25  | 10.19 | 1.35E-01 | 31.77  | 55.22  | 5.65E-01 | 10.44  | 5.49  | 5.70E-02 | -1.69  | 16.48 | 9.18E-01 |
| cg01877565 | 18.14  | 7.89  | 2.15E-02 | 2.73   | 12.99 | 8.34E-01 | 29.99  | 13.43  | 2.56E-02 | 12.08  | 15.08 | 4.23E-01 | 38.93  | 20.75 | 6.06E-02 |
| cg26282655 | 41.88  | 18.21 | 2.15E-02 | 35.47  | 25.73 | 1.68E-01 | 82.04  | 75.67  | 2.78E-01 | 79.54  | 51.88 | 1.25E-01 | 30.07  | 32.30 | 3.52E-01 |
| cg13942782 | -11.66 | 5.07  | 2.15E-02 | -13.09 | 10.27 | 2.03E-01 | -5.61  | 13.53  | 6.78E-01 | -11.46 | 7.76  | 1.40E-01 | -14.74 | 11.65 | 2.06E-01 |
| cg12741645 | -31.62 | 13.75 | 2.15E-02 | -17.87 | 12.02 | 1.37E-01 | -78.09 | 37.98  | 3.98E-02 | 2.68   | 45.88 | 9.53E-01 | -51.94 | 23.68 | 2.83E-02 |
| cg14932313 | 9.03   | 3.92  | 2.15E-02 | 11.87  | 5.24  | 2.35E-02 | 12.86  | 10.02  | 1.99E-01 | -0.96  | 11.90 | 9.36E-01 | 2.80   | 9.35  | 7.65E-01 |
| cg18098806 | -18.29 | 7.95  | 2.15E-02 | -33.23 | 12.93 | 1.02E-02 | 2.46   | 19.62  | 9.00E-01 | -21.07 | 21.77 | 3.33E-01 | -10.21 | 13.98 | 4.65E-01 |
| cg24970879 | -10.42 | 4.53  | 2.15E-02 | -12.11 | 7.56  | 1.09E-01 | -6.74  | 12.63  | 5.93E-01 | -12.37 | 7.38  | 9.36E-02 | -3.96  | 12.37 | 7.49E-01 |
| cg00660400 | -31.74 | 13.80 | 2.15E-02 | -30.45 | 15.66 | 5.19E-02 | -30.04 | 61.33  | 6.24E-01 | -75.19 | 64.70 | 2.45E-01 | -24.78 | 38.68 | 5.22E-01 |



|            |        |       |          |        |       |          |         |        |          |         |       |          |         |       |          |
|------------|--------|-------|----------|--------|-------|----------|---------|--------|----------|---------|-------|----------|---------|-------|----------|
| cg24151926 | -20.28 | 8.82  | 2.15E-02 | -36.84 | 18.29 | 4.40E-02 | -1.59   | 32.77  | 9.61E-01 | -18.51  | 14.16 | 1.91E-01 | -14.37  | 15.91 | 3.66E-01 |
| cg12209693 | 9.79   | 4.26  | 2.15E-02 | 8.56   | 5.37  | 1.11E-01 | 18.77   | 8.20   | 2.20E-02 | 12.33   | 11.99 | 3.04E-01 | -8.08   | 12.88 | 5.30E-01 |
| cg21644856 | 14.36  | 6.25  | 2.15E-02 | 23.50  | 11.80 | 4.64E-02 | -9.32   | 18.61  | 6.16E-01 | 25.33   | 16.56 | 1.26E-01 | 11.24   | 9.16  | 2.20E-01 |
| cg05526832 | -11.97 | 5.21  | 2.15E-02 | -14.97 | 7.36  | 4.20E-02 | -7.60   | 13.12  | 5.62E-01 | -12.69  | 13.40 | 3.44E-01 | -7.17   | 11.93 | 5.48E-01 |
| cg07337250 | -9.55  | 4.15  | 2.15E-02 | -12.40 | 8.04  | 1.23E-01 | -22.39  | 13.34  | 9.32E-02 | -4.61   | 6.04  | 4.45E-01 | -11.48  | 10.23 | 2.62E-01 |
| cg13477101 | 9.50   | 4.13  | 2.15E-02 | 9.06   | 5.32  | 8.87E-02 | 9.28    | 10.69  | 3.85E-01 | 22.80   | 13.64 | 9.45E-02 | 3.60    | 10.44 | 7.30E-01 |
| cg00838919 | 13.69  | 5.95  | 2.15E-02 | 8.33   | 9.66  | 3.89E-01 | 0.13    | 13.72  | 9.92E-01 | 17.89   | 19.72 | 3.64E-01 | 26.02   | 10.20 | 1.07E-02 |
| cg23488607 | 11.66  | 5.07  | 2.15E-02 | 10.69  | 6.75  | 1.13E-01 | 22.34   | 11.22  | 4.65E-02 | -12.50  | 17.51 | 4.75E-01 | 14.39   | 13.27 | 2.78E-01 |
| cg09062038 | -21.25 | 9.24  | 2.15E-02 | -11.76 | 18.74 | 5.30E-01 | -39.37  | 35.03  | 2.61E-01 | -15.34  | 8.63  | 7.54E-02 | -66.71  | 28.40 | 1.88E-02 |
| cg13924807 | -10.73 | 4.67  | 2.15E-02 | -15.06 | 7.45  | 4.34E-02 | -19.83  | 11.54  | 8.57E-02 | 1.37    | 9.46  | 8.85E-01 | -9.51   | 10.39 | 3.60E-01 |
| cg07583490 | 16.84  | 7.32  | 2.15E-02 | 26.83  | 12.09 | 2.65E-02 | 22.83   | 14.14  | 1.06E-01 | 8.25    | 15.70 | 5.99E-01 | -6.32   | 19.09 | 7.41E-01 |
| cg02349739 | 30.16  | 13.12 | 2.15E-02 | 46.54  | 18.04 | 9.89E-03 | 59.12   | 57.67  | 3.05E-01 | 8.80    | 9.72  | 3.65E-01 | 46.56   | 22.09 | 3.50E-02 |
| cg08662533 | 32.74  | 14.24 | 2.15E-02 | 49.14  | 19.60 | 1.22E-02 | 24.56   | 31.98  | 4.42E-01 | -35.88  | 50.98 | 4.82E-01 | 24.14   | 32.22 | 4.54E-01 |
| cg07957953 | -49.58 | 21.57 | 2.15E-02 | -33.76 | 26.10 | 1.96E-01 | -157.41 | 122.18 | 1.98E-01 | -135.60 | 80.76 | 9.32E-02 | -55.71  | 46.57 | 2.32E-01 |
| cg10320160 | -13.70 | 5.96  | 2.15E-02 | -15.56 | 9.41  | 9.84E-02 | -6.82   | 11.43  | 5.51E-01 | -14.10  | 16.47 | 3.92E-01 | -19.20  | 13.46 | 1.54E-01 |
| cg07196637 | -15.29 | 6.65  | 2.15E-02 | -20.96 | 18.65 | 2.61E-01 | -12.18  | 20.57  | 5.54E-01 | -14.52  | 8.08  | 7.24E-02 | -16.69  | 22.07 | 4.50E-01 |
| cg26807301 | 37.89  | 16.48 | 2.15E-02 | 68.70  | 18.47 | 2.00E-04 | 57.65   | 26.99  | 3.27E-02 | 13.39   | 9.69  | 1.67E-01 | 18.15   | 30.32 | 5.49E-01 |
| cg09120934 | -12.61 | 5.49  | 2.15E-02 | -16.80 | 7.73  | 2.97E-02 | -8.14   | 13.21  | 5.38E-01 | 9.27    | 15.23 | 5.43E-01 | -20.32  | 12.45 | 1.03E-01 |
| cg08368934 | 7.88   | 3.43  | 2.15E-02 | 6.89   | 4.20  | 1.01E-01 | 13.28   | 9.06   | 1.43E-01 | 18.41   | 13.43 | 1.70E-01 | 1.55    | 9.62  | 8.72E-01 |
| cg05701791 | 17.88  | 7.78  | 2.15E-02 | 37.60  | 14.09 | 7.65E-03 | 4.90    | 21.14  | 8.17E-01 | 17.15   | 12.27 | 1.62E-01 | 3.18    | 15.28 | 8.35E-01 |
| cg05308819 | 16.11  | 7.01  | 2.15E-02 | 11.58  | 9.58  | 2.27E-01 | 16.69   | 15.35  | 2.77E-01 | 29.27   | 22.30 | 1.89E-01 | 22.41   | 17.61 | 2.03E-01 |
| cg25463399 | 12.88  | 5.60  | 2.15E-02 | 3.28   | 10.32 | 7.50E-01 | 22.72   | 14.68  | 1.22E-01 | 17.12   | 8.14  | 3.56E-02 | 5.81    | 19.02 | 7.60E-01 |
| cg17020726 | -8.78  | 3.82  | 2.15E-02 | -7.09  | 4.62  | 1.25E-01 | -1.81   | 6.60   | 7.84E-01 | -26.23  | 10.10 | 9.38E-03 | -9.48   | 6.31  | 1.33E-01 |
| cg17395064 | 20.91  | 9.10  | 2.15E-02 | 17.17  | 23.72 | 4.69E-01 | -27.68  | 120.12 | 8.18E-01 | 25.09   | 10.23 | 1.42E-02 | -22.96  | 38.26 | 5.48E-01 |
| cg04292718 | 26.44  | 11.50 | 2.15E-02 | 42.66  | 31.86 | 1.81E-01 | 7.31    | 50.32  | 8.84E-01 | 23.72   | 13.89 | 8.79E-02 | 32.16   | 31.68 | 3.10E-01 |
| cg14071014 | -12.62 | 5.49  | 2.15E-02 | -22.31 | 13.97 | 1.10E-01 | -19.12  | 30.89  | 5.36E-01 | -9.56   | 6.65  | 1.50E-01 | -15.49  | 15.08 | 3.04E-01 |
| cg22297934 | 19.62  | 8.54  | 2.15E-02 | 29.94  | 10.94 | 6.19E-03 | 3.79    | 19.66  | 8.47E-01 | 2.06    | 30.15 | 9.45E-01 | 4.11    | 24.43 | 8.66E-01 |
| cg01244124 | 19.50  | 8.49  | 2.15E-02 | 1.23   | 29.16 | 9.66E-01 | 4.65    | 77.57  | 9.52E-01 | 22.71   | 9.24  | 1.40E-02 | 3.08    | 34.69 | 9.29E-01 |
| cg10416593 | 8.52   | 3.71  | 2.15E-02 | 12.09  | 5.05  | 1.66E-02 | 10.51   | 8.26   | 2.03E-01 | -0.51   | 11.17 | 9.63E-01 | -0.38   | 9.61  | 9.68E-01 |
| cg08930741 | 25.05  | 10.90 | 2.15E-02 | 28.11  | 21.06 | 1.82E-01 | 14.09   | 92.80  | 8.79E-01 | 28.20   | 15.29 | 6.51E-02 | 14.25   | 23.76 | 5.49E-01 |
| cg00693599 | 17.49  | 7.61  | 2.15E-02 | 36.63  | 15.69 | 1.96E-02 | 1.81    | 16.10  | 9.11E-01 | 12.12   | 9.45  | 1.99E-01 | 36.59   | 24.43 | 1.34E-01 |
| cg14662119 | -49.08 | 21.35 | 2.15E-02 | -26.60 | 34.69 | 4.43E-01 | -78.44  | 138.25 | 5.70E-01 | -57.94  | 30.45 | 5.70E-02 | -81.85  | 65.77 | 2.13E-01 |
| cg05332308 | -5.73  | 2.49  | 2.15E-02 | -7.33  | 3.72  | 4.90E-02 | -5.48   | 5.94   | 3.55E-01 | 0.60    | 6.97  | 9.32E-01 | -6.29   | 5.03  | 2.11E-01 |
| cg18628787 | -51.36 | 22.35 | 2.15E-02 | -67.21 | 26.45 | 1.11E-02 | 3.32    | 150.61 | 9.82E-01 | 18.10   | 82.72 | 8.27E-01 | -25.01  | 51.12 | 6.25E-01 |
| cg25790850 | -46.71 | 20.32 | 2.15E-02 | -43.54 | 24.48 | 7.53E-02 | -5.49   | 67.08  | 9.35E-01 | 27.46   | 70.93 | 6.99E-01 | -101.66 | 43.27 | 1.88E-02 |

|            |        |       |          |        |       |          |        |        |          |        |       |          |        |       |          |
|------------|--------|-------|----------|--------|-------|----------|--------|--------|----------|--------|-------|----------|--------|-------|----------|
| cg21804148 | -23.76 | 10.34 | 2.15E-02 | -11.15 | 26.21 | 6.70E-01 | 19.20  | 85.66  | 8.23E-01 | -25.30 | 11.82 | 3.24E-02 | -45.35 | 40.46 | 2.62E-01 |
| cg10079318 | -33.17 | 14.43 | 2.15E-02 | -35.07 | 19.50 | 7.21E-02 | -58.92 | 40.47  | 1.45E-01 | -6.96  | 42.80 | 8.71E-01 | -26.84 | 31.40 | 3.93E-01 |
| cg09777416 | -18.08 | 7.87  | 2.15E-02 | -12.68 | 14.72 | 3.89E-01 | 21.37  | 27.50  | 4.37E-01 | -31.85 | 40.19 | 4.28E-01 | -25.22 | 10.20 | 1.35E-02 |
| cg25469406 | -11.90 | 5.18  | 2.16E-02 | -12.14 | 10.01 | 2.25E-01 | -12.45 | 13.31  | 3.49E-01 | -18.63 | 8.17  | 2.25E-02 | 4.06   | 12.24 | 7.40E-01 |
| cg24251218 | -10.58 | 4.60  | 2.16E-02 | -19.23 | 8.24  | 1.96E-02 | -0.65  | 10.71  | 9.52E-01 | -6.39  | 8.45  | 4.50E-01 | -12.40 | 10.11 | 2.20E-01 |
| cg26673436 | 31.01  | 13.49 | 2.16E-02 | 42.33  | 36.65 | 2.48E-01 | 168.94 | 175.89 | 3.37E-01 | 24.42  | 15.38 | 1.12E-01 | 61.81  | 45.36 | 1.73E-01 |
| cg00078857 | 16.05  | 6.99  | 2.16E-02 | 11.00  | 10.73 | 3.05E-01 | 25.71  | 15.01  | 8.68E-02 | 25.60  | 15.26 | 9.34E-02 | 3.04   | 18.06 | 8.66E-01 |
| cg20284239 | 8.68   | 3.78  | 2.16E-02 | 6.19   | 4.88  | 2.05E-01 | 17.25  | 8.90   | 5.27E-02 | 17.80  | 12.74 | 1.62E-01 | 2.26   | 10.34 | 8.27E-01 |
| cg19360482 | 6.54   | 2.85  | 2.16E-02 | 4.46   | 4.15  | 2.83E-01 | 5.10   | 6.00   | 3.96E-01 | 14.44  | 10.68 | 1.76E-01 | 9.72   | 5.89  | 9.89E-02 |
| cg06079106 | 17.66  | 7.69  | 2.16E-02 | 21.42  | 10.76 | 4.65E-02 | 29.03  | 20.96  | 1.66E-01 | 7.24   | 24.48 | 7.67E-01 | 8.24   | 15.18 | 5.87E-01 |
| cg01557951 | 13.51  | 5.88  | 2.16E-02 | 8.72   | 9.14  | 3.40E-01 | 14.86  | 15.32  | 3.32E-01 | 13.06  | 13.04 | 3.17E-01 | 21.42  | 12.10 | 7.67E-02 |
| cg10483525 | 15.52  | 6.76  | 2.16E-02 | 13.35  | 9.83  | 1.75E-01 | 23.00  | 15.01  | 1.25E-01 | 18.34  | 19.42 | 3.45E-01 | 11.45  | 14.95 | 4.44E-01 |
| cg16730908 | 12.81  | 5.57  | 2.16E-02 | 19.01  | 8.88  | 3.23E-02 | 15.56  | 14.21  | 2.74E-01 | 5.60   | 11.18 | 6.17E-01 | 7.53   | 12.34 | 5.41E-01 |
| cg12736501 | 7.80   | 3.39  | 2.16E-02 | 7.58   | 4.83  | 1.16E-01 | 15.11  | 8.61   | 7.92E-02 | 11.67  | 9.59  | 2.23E-01 | 1.08   | 7.14  | 8.80E-01 |
| cg21042456 | 14.84  | 6.46  | 2.16E-02 | 36.25  | 20.30 | 7.42E-02 | 58.18  | 78.21  | 4.57E-01 | 13.91  | 7.22  | 5.42E-02 | -3.69  | 21.18 | 8.62E-01 |
| cg06758497 | 19.37  | 8.43  | 2.16E-02 | -6.30  | 18.60 | 7.35E-01 | 39.83  | 45.08  | 3.77E-01 | 22.90  | 10.31 | 2.63E-02 | 43.63  | 28.04 | 1.20E-01 |
| cg10118002 | 34.89  | 15.19 | 2.16E-02 | -18.33 | 49.01 | 7.08E-01 | 4.75   | 170.85 | 9.78E-01 | 39.61  | 16.71 | 1.77E-02 | 55.53  | 57.44 | 3.34E-01 |
| cg26246947 | 10.60  | 4.61  | 2.16E-02 | 11.26  | 5.99  | 6.03E-02 | 22.82  | 12.29  | 6.33E-02 | 9.45   | 13.51 | 4.84E-01 | -2.62  | 11.92 | 8.26E-01 |
| cg17279085 | -27.45 | 11.95 | 2.16E-02 | -8.92  | 21.86 | 6.83E-01 | -57.73 | 54.63  | 2.91E-01 | -28.70 | 16.96 | 9.07E-02 | -49.44 | 30.11 | 1.01E-01 |
| cg00582941 | 18.96  | 8.25  | 2.16E-02 | 27.74  | 15.20 | 6.81E-02 | -8.57  | 21.45  | 6.90E-01 | 18.47  | 12.28 | 1.33E-01 | 35.21  | 25.42 | 1.66E-01 |
| cg18269826 | 20.01  | 8.71  | 2.16E-02 | 6.32   | 19.18 | 7.42E-01 | 25.98  | 26.59  | 3.28E-01 | 19.44  | 12.03 | 1.06E-01 | 35.31  | 21.62 | 1.02E-01 |
| cg10251594 | 11.15  | 4.85  | 2.16E-02 | 9.13   | 6.83  | 1.81E-01 | 23.95  | 11.40  | 3.57E-02 | 19.03  | 15.76 | 2.27E-01 | 1.80   | 10.38 | 8.62E-01 |
| cg13560901 | 12.38  | 5.39  | 2.16E-02 | 4.42   | 8.01  | 5.81E-01 | 25.26  | 12.82  | 4.88E-02 | 7.30   | 13.50 | 5.89E-01 | 22.50  | 11.73 | 5.51E-02 |
| cg12352601 | 20.43  | 8.89  | 2.16E-02 | 21.46  | 19.30 | 2.66E-01 | 39.20  | 23.90  | 1.01E-01 | 12.80  | 11.93 | 2.83E-01 | 35.55  | 29.06 | 2.21E-01 |
| cg17332369 | -36.58 | 15.93 | 2.16E-02 | -52.31 | 24.41 | 3.21E-02 | -23.84 | 49.48  | 6.30E-01 | -31.76 | 32.77 | 3.32E-01 | -18.50 | 32.90 | 5.74E-01 |
| cg04904318 | -54.75 | 23.84 | 2.16E-02 | -52.05 | 29.74 | 8.01E-02 | -1.22  | 121.64 | 9.92E-01 | -43.16 | 80.57 | 5.92E-01 | -75.51 | 49.53 | 1.27E-01 |
| cg25189201 | 13.99  | 6.09  | 2.16E-02 | 25.51  | 14.30 | 7.43E-02 | 14.18  | 24.85  | 5.68E-01 | 9.06   | 7.37  | 2.19E-01 | 30.83  | 22.24 | 1.66E-01 |
| cg07058998 | 9.96   | 4.33  | 2.16E-02 | 9.13   | 10.62 | 3.90E-01 | -0.88  | 15.26  | 9.54E-01 | 10.74  | 5.24  | 4.03E-02 | 17.02  | 16.69 | 3.08E-01 |
| cg24557917 | -13.46 | 5.86  | 2.16E-02 | -2.30  | 11.36 | 8.39E-01 | -18.65 | 11.93  | 1.18E-01 | -14.47 | 10.06 | 1.50E-01 | -22.47 | 14.99 | 1.34E-01 |
| cg09716921 | -8.21  | 3.57  | 2.16E-02 | -14.16 | 7.20  | 4.92E-02 | -11.94 | 12.03  | 3.21E-01 | -6.25  | 5.06  | 2.16E-01 | -3.28  | 8.76  | 7.08E-01 |
| cg13442606 | -11.04 | 4.81  | 2.16E-02 | -14.28 | 7.34  | 5.19E-02 | -8.66  | 10.69  | 4.18E-01 | -9.51  | 13.65 | 4.86E-01 | -8.13  | 9.73  | 4.03E-01 |
| cg00793181 | 18.19  | 7.92  | 2.16E-02 | 14.44  | 12.21 | 2.37E-01 | 24.16  | 15.78  | 1.26E-01 | 20.36  | 19.38 | 2.93E-01 | 16.40  | 19.81 | 4.08E-01 |
| cg25558099 | 28.06  | 12.22 | 2.16E-02 | 28.82  | 14.35 | 4.47E-02 | 63.04  | 52.45  | 2.29E-01 | -15.56 | 40.12 | 6.98E-01 | 40.47  | 34.08 | 2.35E-01 |
| cg19881928 | 10.55  | 4.59  | 2.16E-02 | 10.93  | 9.93  | 2.71E-01 | 6.96   | 30.06  | 8.17E-01 | 13.57  | 5.90  | 2.13E-02 | -1.19  | 11.61 | 9.18E-01 |
| cg23892568 | -12.10 | 5.27  | 2.16E-02 | -18.37 | 9.34  | 4.93E-02 | -9.32  | 14.17  | 5.11E-01 | -15.77 | 6.02  | 8.86E-03 | 10.94  | 13.78 | 4.27E-01 |

|            |        |       |          |        |       |          |         |        |          |        |       |          |        |       |          |
|------------|--------|-------|----------|--------|-------|----------|---------|--------|----------|--------|-------|----------|--------|-------|----------|
| cg18514820 | -30.29 | 13.19 | 2.16E-02 | -63.55 | 25.77 | 1.36E-02 | -26.66  | 73.12  | 7.15E-01 | -27.32 | 14.64 | 6.20E-02 | 13.29  | 34.69 | 7.02E-01 |
| cg09070378 | 13.03  | 5.67  | 2.16E-02 | 11.54  | 9.16  | 2.08E-01 | 26.49   | 11.44  | 2.05E-02 | 8.60   | 11.20 | 4.42E-01 | -1.11  | 16.84 | 9.47E-01 |
| cg20398362 | 15.04  | 6.55  | 2.17E-02 | 17.34  | 9.41  | 6.52E-02 | 13.89   | 13.42  | 3.00E-01 | 20.72  | 20.19 | 3.05E-01 | 6.64   | 15.80 | 6.74E-01 |
| cg12688240 | 7.08   | 3.08  | 2.17E-02 | 8.14   | 4.46  | 6.77E-02 | 8.11    | 6.69   | 2.25E-01 | 5.19   | 7.11  | 4.65E-01 | 4.01   | 8.88  | 6.51E-01 |
| cg04578777 | 11.49  | 5.01  | 2.17E-02 | 20.37  | 12.71 | 1.09E-01 | -12.03  | 23.18  | 6.04E-01 | 9.79   | 5.88  | 9.57E-02 | 24.46  | 18.47 | 1.85E-01 |
| cg04155600 | 21.28  | 9.27  | 2.17E-02 | 23.04  | 17.44 | 1.87E-01 | 1.75    | 39.54  | 9.65E-01 | 20.10  | 12.73 | 1.14E-01 | 30.26  | 25.37 | 2.33E-01 |
| cg20417351 | 8.92   | 3.89  | 2.17E-02 | 10.24  | 5.47  | 6.11E-02 | 7.47    | 9.43   | 4.28E-01 | 16.60  | 9.75  | 8.86E-02 | -0.91  | 9.51  | 9.24E-01 |
| cg03158666 | -35.60 | 15.50 | 2.17E-02 | -81.48 | 44.92 | 6.97E-02 | -157.20 | 241.90 | 5.16E-01 | -25.59 | 17.51 | 1.44E-01 | -55.89 | 50.91 | 2.72E-01 |
| cg23013850 | 9.19   | 4.00  | 2.17E-02 | 12.11  | 5.63  | 3.16E-02 | 10.65   | 9.02   | 2.38E-01 | 7.06   | 11.96 | 5.55E-01 | 0.97   | 9.31  | 9.17E-01 |
| cg08871356 | -17.64 | 7.68  | 2.17E-02 | 3.30   | 18.50 | 8.58E-01 | 11.13   | 35.12  | 7.51E-01 | -25.38 | 9.22  | 5.91E-03 | -13.13 | 26.42 | 6.19E-01 |
| cg18988435 | -9.83  | 4.28  | 2.17E-02 | -14.69 | 6.41  | 2.19E-02 | -1.14   | 9.32   | 9.03E-01 | -22.40 | 11.58 | 5.31E-02 | -3.68  | 7.49  | 6.24E-01 |
| cg05091519 | 26.02  | 11.33 | 2.17E-02 | 33.72  | 18.99 | 7.57E-02 | 30.36   | 85.83  | 7.24E-01 | 23.62  | 16.20 | 1.45E-01 | 14.01  | 30.57 | 6.47E-01 |
| cg25936876 | 14.19  | 6.18  | 2.17E-02 | 16.97  | 15.10 | 2.61E-01 | 20.29   | 24.01  | 3.98E-01 | 14.09  | 7.38  | 5.64E-02 | 1.97   | 24.27 | 9.35E-01 |
| cg19126471 | -39.74 | 17.31 | 2.17E-02 | -49.53 | 24.69 | 4.48E-02 | -12.47  | 35.97  | 7.29E-01 | -29.09 | 50.04 | 5.61E-01 | -57.34 | 43.62 | 1.89E-01 |
| cg01477133 | -12.78 | 5.57  | 2.17E-02 | -20.20 | 8.75  | 2.09E-02 | -11.71  | 12.93  | 3.65E-01 | -19.59 | 15.25 | 1.99E-01 | 0.68   | 10.60 | 9.49E-01 |
| cg15181393 | -15.01 | 6.54  | 2.17E-02 | -10.04 | 15.31 | 5.12E-01 | 1.30    | 25.63  | 9.59E-01 | -18.62 | 8.02  | 2.03E-02 | -10.16 | 21.94 | 6.43E-01 |
| cg15734454 | -10.61 | 4.62  | 2.17E-02 | -5.15  | 12.54 | 6.81E-01 | -16.63  | 23.17  | 4.73E-01 | -12.88 | 5.43  | 1.76E-02 | 0.95   | 14.67 | 9.49E-01 |
| cg12168275 | -24.24 | 10.56 | 2.17E-02 | -14.73 | 16.06 | 3.59E-01 | -22.44  | 24.78  | 3.65E-01 | -23.92 | 23.39 | 3.06E-01 | -48.87 | 24.70 | 4.79E-02 |
| cg03618113 | 8.26   | 3.60  | 2.17E-02 | 6.93   | 6.02  | 2.50E-01 | 8.19    | 7.11   | 2.49E-01 | 15.87  | 7.52  | 3.48E-02 | 0.32   | 9.07  | 9.72E-01 |
| cg20676580 | 15.72  | 6.85  | 2.17E-02 | 3.25   | 11.07 | 7.69E-01 | 27.29   | 11.79  | 2.07E-02 | 7.38   | 18.00 | 6.82E-01 | 29.27  | 17.59 | 9.60E-02 |
| cg04212081 | 20.74  | 9.04  | 2.17E-02 | 34.69  | 18.49 | 6.07E-02 | 25.32   | 18.16  | 1.63E-01 | 3.79   | 14.58 | 7.95E-01 | 36.61  | 25.12 | 1.45E-01 |
| cg10236247 | -11.59 | 5.05  | 2.17E-02 | -23.32 | 12.71 | 6.64E-02 | -17.84  | 21.11  | 3.98E-01 | -6.42  | 5.97  | 2.82E-01 | -32.95 | 19.14 | 8.52E-02 |
| cg10717074 | 31.81  | 13.86 | 2.17E-02 | 29.86  | 17.37 | 8.55E-02 | -33.31  | 78.91  | 6.73E-01 | 94.38  | 46.62 | 4.29E-02 | 22.46  | 28.05 | 4.23E-01 |
| cg06585307 | 14.11  | 6.15  | 2.17E-02 | 12.70  | 14.80 | 3.91E-01 | 32.03   | 21.09  | 1.29E-01 | 14.13  | 7.45  | 5.80E-02 | -6.61  | 24.57 | 7.88E-01 |
| cg13455623 | -40.80 | 17.78 | 2.17E-02 | -20.96 | 25.37 | 4.09E-01 | 53.04   | 121.84 | 6.63E-01 | -84.31 | 36.40 | 2.06E-02 | -46.30 | 35.61 | 1.94E-01 |
| cg11700959 | -10.02 | 4.36  | 2.17E-02 | -8.50  | 5.67  | 1.34E-01 | -16.96  | 11.07  | 1.26E-01 | -4.29  | 12.67 | 7.35E-01 | -13.75 | 11.95 | 2.50E-01 |
| cg19223782 | 8.08   | 3.52  | 2.17E-02 | 8.95   | 4.41  | 4.23E-02 | 14.86   | 9.80   | 1.29E-01 | 0.80   | 10.25 | 9.38E-01 | 3.12   | 10.37 | 7.63E-01 |
| cg27292870 | 17.08  | 7.44  | 2.17E-02 | 38.23  | 15.68 | 1.48E-02 | 18.76   | 29.69  | 5.28E-01 | 12.02  | 9.60  | 2.11E-01 | 0.62   | 22.33 | 9.78E-01 |
| cg06961122 | 17.31  | 7.54  | 2.17E-02 | 15.51  | 20.64 | 4.52E-01 | 12.66   | 29.86  | 6.71E-01 | 17.65  | 9.23  | 5.60E-02 | 19.60  | 20.48 | 3.38E-01 |
| cg05893300 | 33.29  | 14.50 | 2.17E-02 | 33.75  | 18.08 | 6.19E-02 | 37.93   | 55.32  | 4.93E-01 | 73.92  | 69.15 | 2.85E-01 | 23.42  | 29.39 | 4.26E-01 |
| cg17036419 | -11.31 | 4.93  | 2.17E-02 | -11.53 | 8.41  | 1.70E-01 | -6.49   | 18.75  | 7.29E-01 | -10.45 | 7.28  | 1.51E-01 | -16.34 | 13.69 | 2.33E-01 |
| cg03788239 | -10.83 | 4.72  | 2.17E-02 | -15.32 | 6.66  | 2.15E-02 | -8.56   | 11.10  | 4.40E-01 | 1.39   | 14.19 | 9.22E-01 | -8.47  | 10.37 | 4.14E-01 |
| cg26014796 | 21.78  | 9.49  | 2.17E-02 | 27.65  | 13.62 | 4.24E-02 | 34.51   | 28.19  | 2.21E-01 | 13.44  | 23.34 | 5.65E-01 | 9.45   | 19.52 | 6.28E-01 |
| cg18078170 | 14.15  | 6.16  | 2.17E-02 | 23.10  | 14.93 | 1.22E-01 | 15.27   | 15.92  | 3.38E-01 | 10.27  | 7.89  | 1.93E-01 | 23.95  | 23.49 | 3.08E-01 |
| cg00633473 | 29.13  | 12.69 | 2.17E-02 | 40.13  | 15.58 | 1.00E-02 | 17.92   | 58.76  | 7.60E-01 | -15.29 | 66.62 | 8.18E-01 | 8.73   | 25.23 | 7.29E-01 |

|            |        |       |          |        |       |          |        |       |          |        |       |          |        |       |          |
|------------|--------|-------|----------|--------|-------|----------|--------|-------|----------|--------|-------|----------|--------|-------|----------|
| cg17514528 | 7.31   | 3.19  | 2.18E-02 | 11.05  | 4.58  | 1.59E-02 | 5.13   | 6.26  | 4.12E-01 | 5.63   | 11.72 | 6.31E-01 | 1.22   | 7.43  | 8.70E-01 |
| cg25182206 | -16.54 | 7.21  | 2.18E-02 | -15.88 | 11.00 | 1.49E-01 | -6.81  | 19.05 | 7.21E-01 | -32.90 | 16.25 | 4.28E-02 | -9.84  | 15.02 | 5.12E-01 |
| cg16509531 | -10.65 | 4.64  | 2.18E-02 | -13.15 | 10.61 | 2.15E-01 | -13.66 | 16.21 | 3.99E-01 | -8.30  | 5.87  | 1.57E-01 | -18.09 | 14.63 | 2.16E-01 |
| cg01620165 | 8.69   | 3.79  | 2.18E-02 | 9.91   | 5.28  | 6.05E-02 | 13.05  | 9.39  | 1.65E-01 | 2.23   | 10.14 | 8.26E-01 | 6.33   | 8.87  | 4.75E-01 |
| cg04309849 | 7.03   | 3.06  | 2.18E-02 | 2.99   | 4.39  | 4.95E-01 | 7.14   | 7.23  | 3.23E-01 | 17.84  | 8.40  | 3.36E-02 | 9.57   | 6.85  | 1.62E-01 |
| cg02853355 | 6.21   | 2.71  | 2.18E-02 | 5.63   | 3.80  | 1.38E-01 | 10.62  | 6.82  | 1.19E-01 | 7.78   | 5.84  | 1.83E-01 | 0.10   | 7.78  | 9.90E-01 |
| cg00163365 | 18.80  | 8.19  | 2.18E-02 | 18.15  | 10.43 | 8.19E-02 | 26.13  | 23.12 | 2.58E-01 | 37.80  | 38.30 | 3.24E-01 | 12.24  | 17.79 | 4.92E-01 |
| cg19203065 | -17.65 | 7.69  | 2.18E-02 | -15.64 | 17.65 | 3.76E-01 | 5.32   | 27.23 | 8.45E-01 | -20.37 | 9.75  | 3.68E-02 | -22.46 | 23.35 | 3.36E-01 |
| cg06986158 | 22.02  | 9.60  | 2.18E-02 | 36.38  | 20.46 | 7.53E-02 | -2.85  | 39.53 | 9.43E-01 | 20.07  | 12.08 | 9.66E-02 | 16.84  | 32.11 | 6.00E-01 |
| cg07618101 | 20.58  | 8.97  | 2.18E-02 | 14.33  | 16.60 | 3.88E-01 | 9.66   | 25.71 | 7.07E-01 | 24.03  | 13.26 | 6.99E-02 | 32.77  | 25.01 | 1.90E-01 |
| cg13547889 | -10.71 | 4.67  | 2.18E-02 | -9.25  | 6.77  | 1.72E-01 | -7.53  | 13.18 | 5.68E-01 | -19.28 | 9.40  | 4.04E-02 | -4.05  | 11.92 | 7.34E-01 |
| cg17366563 | 12.43  | 5.42  | 2.18E-02 | 15.93  | 9.43  | 9.12E-02 | 17.70  | 12.74 | 1.65E-01 | 11.02  | 8.58  | 1.99E-01 | -4.70  | 18.05 | 7.95E-01 |
| cg26939277 | -5.41  | 2.36  | 2.18E-02 | -3.06  | 3.57  | 3.91E-01 | -3.44  | 5.12  | 5.02E-01 | -12.37 | 5.87  | 3.51E-02 | -7.07  | 5.40  | 1.90E-01 |
| cg11049863 | 20.96  | 9.14  | 2.18E-02 | 19.88  | 18.23 | 2.76E-01 | 1.96   | 18.23 | 9.15E-01 | 30.57  | 15.49 | 4.84E-02 | 32.29  | 23.61 | 1.71E-01 |
| cg26432350 | 10.01  | 4.36  | 2.18E-02 | 12.80  | 5.63  | 2.29E-02 | 18.70  | 12.12 | 1.23E-01 | 4.18   | 13.00 | 7.48E-01 | -3.73  | 11.02 | 7.35E-01 |
| cg06839449 | -11.54 | 5.03  | 2.18E-02 | -0.81  | 13.27 | 9.51E-01 | -12.30 | 20.48 | 5.48E-01 | -14.63 | 5.85  | 1.23E-02 | 2.64   | 21.22 | 9.01E-01 |
| cg09391949 | 24.08  | 10.50 | 2.18E-02 | 42.19  | 16.06 | 8.63E-03 | 11.94  | 19.26 | 5.35E-01 | 26.47  | 31.10 | 3.95E-01 | -3.07  | 26.06 | 9.06E-01 |
| cg23834919 | -10.05 | 4.38  | 2.18E-02 | -22.25 | 11.48 | 5.27E-02 | -8.85  | 17.69 | 6.17E-01 | -6.99  | 5.28  | 1.86E-01 | -13.85 | 13.46 | 3.03E-01 |
| cg24876960 | 17.32  | 7.55  | 2.18E-02 | 25.55  | 25.00 | 3.07E-01 | 53.83  | 64.24 | 4.02E-01 | 19.95  | 8.53  | 1.93E-02 | -12.69 | 22.71 | 5.76E-01 |
| cg19539182 | 20.45  | 8.92  | 2.18E-02 | 48.09  | 20.24 | 1.75E-02 | 31.47  | 23.95 | 1.89E-01 | 12.78  | 10.40 | 2.19E-01 | -2.75  | 30.60 | 9.28E-01 |
| cg00587466 | -39.50 | 17.22 | 2.18E-02 | -33.69 | 22.19 | 1.29E-01 | 39.45  | 62.79 | 5.30E-01 | -47.28 | 75.45 | 5.31E-01 | -72.89 | 33.11 | 2.77E-02 |
| cg08468082 | -15.06 | 6.56  | 2.18E-02 | -11.33 | 12.14 | 3.51E-01 | -16.03 | 13.51 | 2.36E-01 | -16.45 | 12.26 | 1.80E-01 | -17.56 | 15.26 | 2.50E-01 |
| cg08443019 | 21.94  | 9.57  | 2.18E-02 | 26.79  | 19.03 | 1.59E-01 | 28.72  | 19.36 | 1.38E-01 | 7.96   | 16.25 | 6.24E-01 | 34.51  | 24.18 | 1.54E-01 |
| cg03055065 | 9.87   | 4.30  | 2.18E-02 | 5.37   | 6.68  | 4.21E-01 | 18.73  | 9.47  | 4.80E-02 | 13.85  | 12.18 | 2.55E-01 | 8.06   | 8.54  | 3.45E-01 |
| cg15820432 | -10.34 | 4.51  | 2.18E-02 | -10.67 | 10.95 | 3.30E-01 | 1.62   | 16.49 | 9.22E-01 | -11.90 | 5.45  | 2.92E-02 | -7.20  | 16.66 | 6.65E-01 |
| cg05813650 | 19.67  | 8.58  | 2.18E-02 | 32.02  | 16.30 | 4.94E-02 | 17.72  | 18.94 | 3.50E-01 | 11.43  | 13.32 | 3.91E-01 | 23.53  | 26.71 | 3.78E-01 |
| cg02102075 | 5.71   | 2.49  | 2.18E-02 | 3.96   | 3.27  | 2.26E-01 | 12.12  | 5.68  | 3.30E-02 | 5.80   | 7.30  | 4.27E-01 | 3.70   | 7.43  | 6.18E-01 |
| cg02490718 | 16.43  | 7.17  | 2.18E-02 | 33.43  | 18.79 | 7.52E-02 | -23.06 | 40.96 | 5.73E-01 | 15.44  | 8.29  | 6.25E-02 | 9.61   | 25.89 | 7.10E-01 |
| cg09141303 | -5.91  | 2.58  | 2.18E-02 | -2.00  | 4.33  | 6.44E-01 | -4.02  | 5.96  | 4.99E-01 | -8.29  | 4.47  | 6.37E-02 | -13.44 | 7.26  | 6.43E-02 |
| cg03167413 | 27.67  | 12.07 | 2.18E-02 | 34.81  | 14.50 | 1.63E-02 | -9.01  | 59.68 | 8.80E-01 | 38.46  | 33.75 | 2.54E-01 | -7.20  | 32.43 | 8.24E-01 |
| cg02006915 | -11.33 | 4.94  | 2.18E-02 | -12.44 | 9.43  | 1.87E-01 | -2.54  | 12.48 | 8.39E-01 | -14.19 | 8.02  | 7.66E-02 | -11.27 | 11.40 | 3.23E-01 |
| cg17608706 | 20.01  | 8.73  | 2.18E-02 | 40.67  | 16.99 | 1.67E-02 | 2.68   | 16.85 | 8.74E-01 | 14.60  | 14.80 | 3.24E-01 | 28.97  | 25.15 | 2.49E-01 |
| cg26308042 | -14.97 | 6.53  | 2.18E-02 | -35.21 | 16.11 | 2.89E-02 | -9.84  | 21.25 | 6.43E-01 | -8.90  | 8.21  | 2.79E-01 | -24.18 | 19.77 | 2.21E-01 |
| cg15475101 | 12.72  | 5.55  | 2.19E-02 | 3.28   | 12.49 | 7.93E-01 | -15.50 | 25.22 | 5.39E-01 | 17.15  | 6.71  | 1.06E-02 | 15.46  | 20.80 | 4.57E-01 |
| cg02656891 | 11.42  | 4.98  | 2.19E-02 | 12.83  | 11.03 | 2.45E-01 | 15.04  | 11.95 | 2.08E-01 | 14.36  | 8.86  | 1.05E-01 | 5.38   | 9.01  | 5.50E-01 |

|            |        |       |          |        |       |          |        |        |          |        |       |          |        |       |          |
|------------|--------|-------|----------|--------|-------|----------|--------|--------|----------|--------|-------|----------|--------|-------|----------|
| cg05165940 | 16.26  | 7.09  | 2.19E-02 | 24.47  | 13.89 | 7.81E-02 | 11.91  | 14.59  | 4.14E-01 | 18.52  | 13.79 | 1.79E-01 | 9.10   | 14.51 | 5.31E-01 |
| cg06160973 | 9.62   | 4.20  | 2.19E-02 | 12.96  | 6.03  | 3.15E-02 | 9.78   | 9.76   | 3.16E-01 | 6.39   | 10.86 | 5.56E-01 | 3.17   | 9.86  | 7.48E-01 |
| cg13412066 | 17.33  | 7.56  | 2.19E-02 | -14.60 | 31.90 | 6.47E-01 | -67.34 | 130.11 | 6.05E-01 | 20.99  | 7.99  | 8.60E-03 | -9.47  | 35.81 | 7.91E-01 |
| cg18792381 | 12.43  | 5.42  | 2.19E-02 | 12.08  | 7.84  | 1.23E-01 | 16.67  | 14.91  | 2.64E-01 | 0.89   | 20.04 | 9.65E-01 | 13.84  | 9.63  | 1.51E-01 |
| cg14349763 | -11.90 | 5.19  | 2.19E-02 | -18.44 | 7.58  | 1.50E-02 | -8.01  | 14.55  | 5.82E-01 | 1.34   | 11.91 | 9.10E-01 | -11.64 | 11.24 | 3.00E-01 |
| cg12570134 | -10.79 | 4.71  | 2.19E-02 | -17.47 | 11.48 | 1.28E-01 | 5.04   | 16.04  | 7.53E-01 | -11.95 | 5.78  | 3.88E-02 | -4.47  | 16.27 | 7.83E-01 |
| cg19653212 | 13.93  | 6.08  | 2.19E-02 | 19.88  | 12.91 | 1.24E-01 | 3.64   | 23.15  | 8.75E-01 | 11.19  | 8.22  | 1.73E-01 | 19.41  | 15.06 | 1.98E-01 |
| cg14857193 | -12.88 | 5.62  | 2.19E-02 | -17.12 | 8.08  | 3.42E-02 | -5.95  | 13.59  | 6.62E-01 | -23.81 | 16.18 | 1.41E-01 | -3.22  | 11.82 | 7.85E-01 |
| cg02007217 | -13.62 | 5.94  | 2.19E-02 | -16.31 | 9.97  | 1.02E-01 | 0.99   | 12.78  | 9.38E-01 | -9.40  | 6.01  | 1.18E-01 | -33.92 | 12.36 | 6.07E-03 |
| cg27160537 | 24.88  | 10.85 | 2.19E-02 | 32.56  | 16.53 | 4.88E-02 | 51.21  | 21.24  | 1.59E-02 | 0.19   | 18.66 | 9.92E-01 | 15.86  | 24.08 | 5.10E-01 |
| cg02246876 | 10.09  | 4.40  | 2.19E-02 | 10.56  | 6.63  | 1.11E-01 | 18.36  | 9.16   | 4.51E-02 | 10.47  | 10.17 | 3.03E-01 | -5.36  | 11.70 | 6.47E-01 |
| cg18374914 | -14.49 | 6.32  | 2.19E-02 | -4.08  | 12.91 | 7.52E-01 | -11.32 | 16.24  | 4.86E-01 | -12.14 | 8.02  | 1.30E-01 | -39.33 | 15.50 | 1.12E-02 |
| cg21493633 | 19.72  | 8.60  | 2.19E-02 | 35.17  | 13.99 | 1.19E-02 | 10.65  | 26.73  | 6.90E-01 | 23.02  | 22.30 | 3.02E-01 | 5.11   | 14.16 | 7.18E-01 |
| cg14957089 | -7.02  | 3.06  | 2.19E-02 | -5.62  | 3.98  | 1.58E-01 | -7.93  | 7.57   | 2.95E-01 | -10.20 | 8.98  | 2.56E-01 | -9.40  | 8.53  | 2.70E-01 |
| cg18101022 | 15.22  | 6.64  | 2.19E-02 | 14.73  | 13.26 | 2.67E-01 | 13.57  | 20.80  | 5.14E-01 | 13.88  | 10.35 | 1.80E-01 | 18.82  | 13.69 | 1.69E-01 |
| cg06092948 | 14.02  | 6.11  | 2.19E-02 | 11.85  | 7.71  | 1.24E-01 | 8.49   | 27.46  | 7.57E-01 | -13.76 | 64.99 | 8.32E-01 | 20.01  | 10.92 | 6.70E-02 |
| cg17306401 | -13.60 | 5.93  | 2.19E-02 | -17.44 | 8.93  | 5.07E-02 | -9.85  | 13.93  | 4.80E-01 | -22.49 | 17.63 | 2.02E-01 | -5.92  | 11.55 | 6.08E-01 |
| cg09599130 | 17.05  | 7.44  | 2.19E-02 | 14.87  | 14.41 | 3.02E-01 | 22.89  | 18.82  | 2.24E-01 | 23.65  | 13.83 | 8.73E-02 | 9.27   | 13.87 | 5.04E-01 |
| cg08137040 | 6.63   | 2.89  | 2.19E-02 | 8.48   | 4.09  | 3.83E-02 | 5.99   | 6.14   | 3.29E-01 | -4.43  | 9.84  | 6.52E-01 | 7.52   | 6.59  | 2.53E-01 |
| cg15556990 | -10.11 | 4.41  | 2.19E-02 | -23.87 | 11.35 | 3.54E-02 | 5.38   | 13.38  | 6.87E-01 | -10.17 | 5.45  | 6.20E-02 | -4.99  | 15.07 | 7.40E-01 |
| cg20013688 | -13.78 | 6.01  | 2.19E-02 | -25.63 | 9.60  | 7.59E-03 | -2.53  | 13.73  | 8.54E-01 | -2.12  | 11.73 | 8.56E-01 | -16.96 | 12.16 | 1.63E-01 |
| cg16173280 | 18.38  | 8.02  | 2.19E-02 | 16.51  | 18.51 | 3.73E-01 | 10.39  | 21.22  | 6.24E-01 | 21.52  | 10.65 | 4.33E-02 | 15.57  | 25.11 | 5.35E-01 |
| cg26213224 | -13.44 | 5.87  | 2.19E-02 | -14.01 | 9.31  | 1.32E-01 | -11.33 | 13.64  | 4.06E-01 | -12.72 | 13.21 | 3.35E-01 | -14.84 | 12.50 | 2.35E-01 |
| cg18345826 | 31.42  | 13.71 | 2.19E-02 | 40.06  | 19.80 | 4.30E-02 | 8.96   | 108.68 | 9.34E-01 | 27.30  | 34.85 | 4.33E-01 | 22.41  | 23.19 | 3.34E-01 |
| cg11325716 | -15.13 | 6.60  | 2.19E-02 | -16.88 | 12.62 | 1.81E-01 | -28.97 | 16.33  | 7.60E-02 | -9.05  | 10.37 | 3.83E-01 | -13.35 | 16.64 | 4.22E-01 |
| cg00153106 | 26.78  | 11.68 | 2.19E-02 | 26.24  | 16.64 | 1.15E-01 | 2.76   | 31.30  | 9.30E-01 | 60.60  | 30.02 | 4.35E-02 | 19.77  | 25.13 | 4.32E-01 |
| cg06315217 | 10.81  | 4.72  | 2.19E-02 | 11.98  | 6.63  | 7.07E-02 | 16.40  | 11.19  | 1.43E-01 | 8.95   | 11.33 | 4.30E-01 | 1.90   | 12.55 | 8.80E-01 |
| cg25736517 | -19.38 | 8.46  | 2.19E-02 | -39.31 | 22.60 | 8.20E-02 | 28.40  | 36.45  | 4.36E-01 | -20.93 | 9.84  | 3.33E-02 | 0.98   | 32.60 | 9.76E-01 |
| cg24166018 | -12.07 | 5.27  | 2.19E-02 | -15.21 | 9.20  | 9.82E-02 | -26.64 | 11.62  | 2.19E-02 | -4.64  | 9.66  | 6.31E-01 | -1.39  | 12.77 | 9.13E-01 |
| cg06215457 | 16.90  | 7.38  | 2.20E-02 | 25.60  | 11.57 | 2.70E-02 | 1.75   | 21.22  | 9.34E-01 | 25.25  | 19.31 | 1.91E-01 | 7.98   | 12.90 | 5.36E-01 |
| cg18596794 | -13.74 | 6.00  | 2.20E-02 | -9.98  | 17.37 | 5.66E-01 | 27.94  | 32.24  | 3.86E-01 | -16.44 | 6.77  | 1.52E-02 | -9.99  | 24.14 | 6.79E-01 |
| cg17307348 | 23.98  | 10.47 | 2.20E-02 | -4.51  | 19.24 | 8.15E-01 | 89.32  | 76.60  | 2.44E-01 | 28.30  | 8.99  | 1.65E-03 | 43.41  | 25.53 | 8.91E-02 |
| cg25298725 | -13.54 | 5.91  | 2.20E-02 | -18.96 | 9.23  | 4.00E-02 | -6.38  | 13.80  | 6.44E-01 | -0.73  | 14.58 | 9.60E-01 | -18.45 | 11.99 | 1.24E-01 |
| cg12813768 | -6.49  | 2.83  | 2.20E-02 | -9.56  | 4.21  | 2.32E-02 | -1.70  | 5.19   | 7.43E-01 | 9.14   | 13.92 | 5.11E-01 | -9.75  | 6.19  | 1.16E-01 |
| cg24644605 | -11.24 | 4.90  | 2.20E-02 | -12.25 | 9.27  | 1.86E-01 | -10.21 | 13.37  | 4.45E-01 | -9.02  | 7.99  | 2.59E-01 | -14.54 | 10.73 | 1.75E-01 |

|            |        |       |          |        |       |          |        |        |          |         |       |          |        |       |          |
|------------|--------|-------|----------|--------|-------|----------|--------|--------|----------|---------|-------|----------|--------|-------|----------|
| cg03209412 | 5.39   | 2.35  | 2.20E-02 | 1.34   | 3.17  | 6.72E-01 | 10.23  | 5.48   | 6.16E-02 | 7.66    | 6.76  | 2.57E-01 | 9.35   | 4.94  | 5.82E-02 |
| cg22651416 | 18.93  | 8.26  | 2.20E-02 | 12.28  | 18.74 | 5.12E-01 | -0.82  | 28.47  | 9.77E-01 | 20.10   | 10.49 | 5.54E-02 | 41.16  | 26.05 | 1.14E-01 |
| cg09985344 | -8.61  | 3.76  | 2.20E-02 | -7.68  | 5.92  | 1.95E-01 | -13.13 | 8.15   | 1.07E-01 | -6.42   | 9.64  | 5.05E-01 | -7.50  | 7.78  | 3.35E-01 |
| cg13944175 | 11.67  | 5.10  | 2.20E-02 | 22.99  | 9.22  | 1.27E-02 | 14.17  | 10.19  | 1.64E-01 | 14.90   | 7.76  | 5.48E-02 | 0.85   | 6.17  | 8.91E-01 |
| cg13863204 | -19.30 | 8.43  | 2.20E-02 | -20.61 | 24.27 | 3.96E-01 | 4.68   | 28.87  | 8.71E-01 | -23.19  | 9.85  | 1.85E-02 | -3.80  | 33.84 | 9.11E-01 |
| cg00199549 | -11.53 | 5.03  | 2.20E-02 | -13.12 | 14.93 | 3.80E-01 | -3.49  | 22.27  | 8.75E-01 | -12.90  | 5.79  | 2.58E-02 | -1.35  | 17.89 | 9.40E-01 |
| cg25857090 | 14.03  | 6.12  | 2.20E-02 | 7.61   | 13.26 | 5.66E-01 | -0.89  | 46.44  | 9.85E-01 | 16.60   | 7.33  | 2.35E-02 | 11.62  | 22.98 | 6.13E-01 |
| cg12665059 | -11.63 | 5.08  | 2.20E-02 | -23.24 | 14.20 | 1.02E-01 | -10.41 | 18.40  | 5.72E-01 | -8.82   | 6.07  | 1.46E-01 | -17.64 | 16.38 | 2.82E-01 |
| cg01617211 | -12.43 | 5.42  | 2.20E-02 | -14.77 | 12.03 | 2.19E-01 | -10.01 | 17.26  | 5.62E-01 | -10.50  | 7.31  | 1.51E-01 | -17.98 | 14.12 | 2.03E-01 |
| cg10313879 | -49.33 | 21.54 | 2.20E-02 | -37.22 | 26.73 | 1.64E-01 | 67.81  | 155.56 | 6.63E-01 | -118.12 | 58.39 | 4.31E-02 | -53.14 | 48.68 | 2.75E-01 |
| cg10897223 | 8.54   | 3.73  | 2.20E-02 | 9.88   | 5.06  | 5.09E-02 | 8.90   | 9.55   | 3.52E-01 | 11.11   | 9.92  | 2.63E-01 | 1.55   | 9.22  | 8.67E-01 |
| cg01565508 | 6.56   | 2.86  | 2.20E-02 | 5.82   | 3.62  | 1.08E-01 | 12.69  | 7.15   | 7.58E-02 | 2.02    | 9.13  | 8.25E-01 | 5.88   | 8.39  | 4.83E-01 |
| cg16809304 | -19.63 | 8.57  | 2.20E-02 | -24.47 | 16.10 | 1.28E-01 | 10.40  | 19.92  | 6.02E-01 | -22.21  | 17.06 | 1.93E-01 | -32.30 | 16.22 | 4.65E-02 |
| cg06006907 | -13.20 | 5.76  | 2.20E-02 | -23.57 | 7.26  | 1.17E-03 | -10.59 | 11.95  | 3.76E-01 | 3.88    | 14.33 | 7.86E-01 | -7.70  | 10.35 | 4.57E-01 |
| cg09254142 | 21.62  | 9.44  | 2.20E-02 | -21.70 | 27.18 | 4.25E-01 | 27.66  | 80.80  | 7.32E-01 | 28.18   | 11.64 | 1.55E-02 | 25.62  | 20.68 | 2.15E-01 |
| cg05254518 | 25.81  | 11.27 | 2.20E-02 | 36.70  | 14.84 | 1.34E-02 | 32.07  | 51.05  | 5.30E-01 | 58.88   | 47.91 | 2.19E-01 | -0.55  | 19.94 | 9.78E-01 |
| cg12272104 | 16.37  | 7.15  | 2.20E-02 | 16.64  | 12.23 | 1.74E-01 | 22.07  | 14.48  | 1.28E-01 | 9.90    | 13.20 | 4.53E-01 | 19.75  | 20.44 | 3.34E-01 |
| cg17948846 | -23.67 | 10.33 | 2.20E-02 | -21.63 | 12.80 | 9.11E-02 | -24.36 | 29.22  | 4.04E-01 | -18.68  | 35.44 | 5.98E-01 | -35.75 | 27.81 | 1.99E-01 |
| cg05928873 | -11.15 | 4.87  | 2.20E-02 | -23.61 | 7.18  | 1.00E-03 | -6.24  | 14.75  | 6.73E-01 | -5.83   | 4.11  | 1.56E-01 | -8.09  | 10.22 | 4.29E-01 |
| cg01501406 | 19.60  | 8.56  | 2.20E-02 | 8.00   | 14.79 | 5.89E-01 | 21.27  | 14.62  | 1.46E-01 | 30.31   | 23.18 | 1.91E-01 | 29.54  | 19.82 | 1.36E-01 |
| cg00118229 | -15.46 | 6.75  | 2.20E-02 | -30.13 | 11.05 | 6.40E-03 | -5.61  | 15.68  | 7.21E-01 | -3.71   | 17.67 | 8.34E-01 | -8.92  | 12.42 | 4.73E-01 |
| cg16124935 | -20.86 | 9.11  | 2.20E-02 | -12.76 | 13.70 | 3.52E-01 | 2.50   | 32.38  | 9.38E-01 | -32.68  | 27.47 | 2.34E-01 | -32.05 | 14.99 | 3.26E-02 |
| cg16458196 | 16.34  | 7.14  | 2.20E-02 | 16.21  | 14.01 | 2.47E-01 | 12.66  | 17.41  | 4.67E-01 | 14.51   | 14.11 | 3.04E-01 | 19.88  | 12.68 | 1.17E-01 |
| cg02021919 | 4.73   | 2.06  | 2.20E-02 | 4.50   | 3.02  | 1.36E-01 | 6.70   | 5.36   | 2.11E-01 | 3.98    | 3.83  | 2.99E-01 | 5.11   | 6.77  | 4.51E-01 |
| cg16735986 | 15.43  | 6.74  | 2.20E-02 | 11.97  | 11.31 | 2.90E-01 | 22.38  | 18.79  | 2.34E-01 | 21.72   | 14.79 | 1.42E-01 | 12.31  | 12.13 | 3.10E-01 |
| cg09526022 | 15.29  | 6.68  | 2.20E-02 | 43.58  | 18.23 | 1.68E-02 | 1.89   | 23.33  | 9.36E-01 | 11.89   | 7.82  | 1.28E-01 | 11.42  | 28.62 | 6.90E-01 |
| cg13390630 | 24.75  | 10.81 | 2.20E-02 | 49.70  | 25.90 | 5.50E-02 | -4.92  | 47.31  | 9.17E-01 | 27.32   | 13.38 | 4.12E-02 | -11.97 | 30.96 | 6.99E-01 |
| cg24191821 | -46.90 | 20.48 | 2.20E-02 | -76.58 | 37.17 | 3.94E-02 | 109.36 | 131.21 | 4.05E-01 | -47.15  | 32.61 | 1.48E-01 | -27.79 | 38.86 | 4.74E-01 |
| cg19546057 | 9.76   | 4.26  | 2.20E-02 | 10.30  | 6.13  | 9.30E-02 | 15.01  | 11.00  | 1.72E-01 | 11.51   | 9.48  | 2.25E-01 | 1.26   | 10.49 | 9.05E-01 |
| cg24681895 | 27.77  | 12.13 | 2.20E-02 | 24.94  | 15.22 | 1.01E-01 | 19.06  | 35.10  | 5.87E-01 | -19.91  | 76.35 | 7.94E-01 | 46.10  | 25.83 | 7.42E-02 |
| cg23805884 | -31.65 | 13.82 | 2.20E-02 | -27.06 | 15.25 | 7.61E-02 | -45.25 | 70.63  | 5.22E-01 | 9.82    | 63.08 | 8.76E-01 | -87.90 | 45.29 | 5.23E-02 |
| cg08660395 | 19.59  | 8.56  | 2.20E-02 | 46.41  | 16.91 | 6.07E-03 | 9.52   | 18.29  | 6.03E-01 | 11.11   | 11.16 | 3.20E-01 | 17.60  | 23.73 | 4.58E-01 |
| cg26263239 | -13.83 | 6.04  | 2.20E-02 | -19.90 | 9.37  | 3.37E-02 | -8.88  | 14.04  | 5.27E-01 | -9.64   | 18.58 | 6.04E-01 | -9.88  | 11.15 | 3.75E-01 |
| cg06044004 | -6.85  | 2.99  | 2.20E-02 | -10.02 | 5.26  | 5.69E-02 | -6.38  | 7.85   | 4.17E-01 | -4.93   | 4.76  | 3.00E-01 | -5.42  | 8.11  | 5.04E-01 |
| cg00150882 | 15.42  | 6.73  | 2.20E-02 | 24.92  | 8.39  | 2.98E-03 | 18.85  | 13.67  | 1.68E-01 | 22.56   | 15.09 | 1.35E-01 | 0.07   | 8.78  | 9.94E-01 |

|            |        |       |          |        |       |          |         |        |          |        |       |          |         |       |          |
|------------|--------|-------|----------|--------|-------|----------|---------|--------|----------|--------|-------|----------|---------|-------|----------|
| cg15352185 | -47.21 | 20.62 | 2.20E-02 | -69.46 | 39.06 | 7.54E-02 | -32.93  | 115.11 | 7.75E-01 | -21.95 | 20.31 | 2.80E-01 | -113.76 | 49.87 | 2.25E-02 |
| cg02388500 | 17.35  | 7.58  | 2.20E-02 | 9.64   | 23.36 | 6.80E-01 | -23.60  | 38.27  | 5.37E-01 | 19.88  | 8.57  | 2.04E-02 | 23.37   | 27.85 | 4.01E-01 |
| cg17921080 | -8.60  | 3.76  | 2.20E-02 | -9.74  | 9.32  | 2.96E-01 | 3.99    | 16.02  | 8.04E-01 | -8.58  | 4.49  | 5.62E-02 | -14.91  | 13.03 | 2.52E-01 |
| cg00901878 | -11.52 | 5.03  | 2.20E-02 | -4.43  | 12.54 | 7.24E-01 | -1.27   | 13.15  | 9.23E-01 | -13.44 | 6.45  | 3.71E-02 | -29.11  | 17.39 | 9.41E-02 |
| cg00715109 | 11.52  | 5.03  | 2.21E-02 | 12.54  | 5.90  | 3.35E-02 | 7.24    | 20.41  | 7.23E-01 | -21.51 | 28.59 | 4.52E-01 | 14.49   | 11.82 | 2.20E-01 |
| cg12895304 | 29.30  | 12.80 | 2.21E-02 | 15.49  | 21.85 | 4.78E-01 | 57.00   | 51.77  | 2.71E-01 | 19.32  | 13.02 | 1.38E-01 | 78.47   | 30.98 | 1.13E-02 |
| cg26607031 | 5.96   | 2.60  | 2.21E-02 | 4.52   | 3.89  | 2.46E-01 | 9.89    | 5.81   | 8.89E-02 | 8.20   | 5.45  | 1.32E-01 | 0.67    | 7.38  | 9.28E-01 |
| cg00959431 | 18.31  | 8.00  | 2.21E-02 | 31.00  | 13.58 | 2.25E-02 | 22.52   | 22.21  | 3.10E-01 | 8.77   | 17.86 | 6.24E-01 | 8.91    | 14.07 | 5.27E-01 |
| cg05170183 | -8.92  | 3.89  | 2.21E-02 | -16.75 | 9.98  | 9.32E-02 | -26.78  | 18.10  | 1.39E-01 | -6.30  | 4.73  | 1.83E-01 | -6.92   | 11.04 | 5.30E-01 |
| cg00293940 | 10.11  | 4.42  | 2.21E-02 | 11.88  | 6.90  | 8.55E-02 | 7.18    | 9.30   | 4.40E-01 | 6.29   | 9.16  | 4.92E-01 | 16.33   | 12.11 | 1.78E-01 |
| cg27226618 | 10.71  | 4.68  | 2.21E-02 | 6.27   | 9.82  | 5.23E-01 | 19.88   | 19.84  | 3.16E-01 | 10.61  | 6.02  | 7.82E-02 | 15.53   | 13.80 | 2.60E-01 |
| cg24713490 | 20.62  | 9.01  | 2.21E-02 | 12.94  | 12.96 | 3.18E-01 | 23.06   | 24.91  | 3.55E-01 | 26.84  | 22.65 | 2.36E-01 | 31.19   | 18.86 | 9.82E-02 |
| cg10959773 | -31.44 | 13.73 | 2.21E-02 | -27.20 | 18.04 | 1.32E-01 | -82.31  | 41.86  | 4.93E-02 | -26.44 | 39.50 | 5.03E-01 | -18.87  | 31.33 | 5.47E-01 |
| cg19522262 | -9.10  | 3.97  | 2.21E-02 | -13.51 | 8.72  | 1.21E-01 | -8.32   | 7.21   | 2.49E-01 | -10.26 | 6.49  | 1.14E-01 | 0.70    | 11.78 | 9.53E-01 |
| cg18922874 | 17.40  | 7.60  | 2.21E-02 | 18.06  | 22.25 | 4.17E-01 | 31.75   | 26.46  | 2.30E-01 | 14.93  | 8.84  | 9.13E-02 | 26.70   | 30.74 | 3.85E-01 |
| cg01819512 | 13.54  | 5.91  | 2.21E-02 | 18.36  | 9.77  | 6.02E-02 | 23.58   | 17.99  | 1.90E-01 | 6.82   | 10.58 | 5.19E-01 | 9.98    | 12.81 | 4.36E-01 |
| cg16272786 | -45.58 | 19.91 | 2.21E-02 | -23.30 | 38.05 | 5.40E-01 | -172.69 | 210.57 | 4.12E-01 | -53.42 | 27.27 | 5.01E-02 | -49.87  | 46.44 | 2.83E-01 |
| cg20793087 | -48.73 | 21.29 | 2.21E-02 | -66.94 | 27.14 | 1.36E-02 | -42.56  | 64.09  | 5.07E-01 | 17.17  | 87.70 | 8.45E-01 | -17.90  | 45.89 | 6.97E-01 |
| cg10441070 | -8.51  | 3.72  | 2.21E-02 | -13.53 | 10.44 | 1.95E-01 | -10.24  | 18.01  | 5.69E-01 | -6.12  | 4.45  | 1.69E-01 | -15.54  | 10.13 | 1.25E-01 |
| cg11143486 | -14.36 | 6.27  | 2.21E-02 | -9.73  | 8.37  | 2.45E-01 | -31.26  | 12.32  | 1.11E-02 | 6.89   | 21.29 | 7.46E-01 | -14.16  | 14.32 | 3.23E-01 |
| cg01046673 | 18.13  | 7.92  | 2.21E-02 | 54.01  | 28.78 | 6.05E-02 | 26.29   | 100.96 | 7.95E-01 | 15.33  | 8.48  | 7.06E-02 | 10.89   | 36.93 | 7.68E-01 |
| cg15617537 | -5.77  | 2.52  | 2.21E-02 | -8.01  | 3.98  | 4.40E-02 | 2.55    | 8.60   | 7.66E-01 | -7.65  | 4.16  | 6.62E-02 | 0.26    | 6.62  | 9.69E-01 |
| cg24432245 | 8.44   | 3.69  | 2.21E-02 | 9.31   | 5.42  | 8.55E-02 | 8.52    | 9.12   | 3.50E-01 | 7.84   | 9.31  | 4.00E-01 | 6.96    | 7.95  | 3.82E-01 |
| cg20447730 | -8.05  | 3.52  | 2.21E-02 | -8.27  | 4.60  | 7.24E-02 | -11.65  | 9.20   | 2.05E-01 | -14.69 | 9.25  | 1.12E-01 | 4.90    | 9.97  | 6.23E-01 |
| cg04720596 | 16.48  | 7.20  | 2.21E-02 | 20.78  | 12.73 | 1.03E-01 | 13.15   | 12.24  | 2.82E-01 | 23.68  | 16.96 | 1.63E-01 | 6.58    | 18.40 | 7.20E-01 |
| cg01799015 | 8.50   | 3.71  | 2.21E-02 | 9.79   | 4.88  | 4.47E-02 | 11.08   | 8.57   | 1.96E-01 | -0.30  | 12.26 | 9.80E-01 | 5.46    | 9.87  | 5.80E-01 |
| cg13722700 | 9.06   | 3.96  | 2.21E-02 | 15.27  | 7.50  | 4.18E-02 | 2.36    | 8.91   | 7.91E-01 | 4.69   | 6.92  | 4.98E-01 | 14.25   | 8.91  | 1.10E-01 |
| cg13188795 | -10.16 | 4.44  | 2.21E-02 | -14.69 | 7.97  | 6.54E-02 | 5.96    | 17.57  | 7.34E-01 | -5.91  | 6.14  | 3.35E-01 | -25.18  | 12.76 | 4.84E-02 |
| cg17631429 | 16.91  | 7.39  | 2.21E-02 | 12.74  | 17.83 | 4.75E-01 | -3.30   | 38.36  | 9.31E-01 | 14.90  | 8.78  | 8.98E-02 | 51.95   | 25.71 | 4.33E-02 |
| cg08630080 | -15.26 | 6.67  | 2.21E-02 | -20.89 | 21.08 | 3.22E-01 | -4.44   | 39.11  | 9.10E-01 | -16.83 | 7.53  | 2.55E-02 | 1.76    | 22.62 | 9.38E-01 |
| cg23502253 | 11.29  | 4.93  | 2.21E-02 | 6.11   | 9.74  | 5.30E-01 | 10.11   | 11.93  | 3.97E-01 | 14.64  | 7.07  | 3.84E-02 | 10.12   | 16.86 | 5.48E-01 |
| cg12285565 | 9.32   | 4.07  | 2.21E-02 | 8.60   | 6.62  | 1.94E-01 | 1.67    | 9.32   | 8.58E-01 | 9.06   | 9.06  | 3.18E-01 | 17.14   | 8.53  | 4.44E-02 |
| cg06798483 | -10.46 | 4.57  | 2.21E-02 | -13.37 | 6.53  | 4.07E-02 | -8.80   | 12.06  | 4.66E-01 | -0.01  | 14.74 | 9.99E-01 | -9.79   | 8.79  | 2.65E-01 |
| cg15790037 | 33.79  | 14.77 | 2.21E-02 | 50.46  | 39.68 | 2.03E-01 | -33.57  | 90.87  | 7.12E-01 | 29.94  | 17.04 | 7.89E-02 | 61.91   | 50.95 | 2.24E-01 |
| cg07632488 | 18.78  | 8.21  | 2.21E-02 | 33.11  | 21.92 | 1.31E-01 | 43.33   | 37.32  | 2.46E-01 | 17.59  | 9.50  | 6.42E-02 | -16.49  | 32.11 | 6.08E-01 |

|            |        |       |          |        |       |          |         |        |          |        |       |          |        |       |          |
|------------|--------|-------|----------|--------|-------|----------|---------|--------|----------|--------|-------|----------|--------|-------|----------|
| cg14544831 | -9.08  | 3.97  | 2.21E-02 | -11.63 | 5.37  | 3.05E-02 | -14.16  | 9.83   | 1.50E-01 | 1.95   | 13.52 | 8.85E-01 | -2.92  | 8.74  | 7.38E-01 |
| cg25122395 | 15.18  | 6.63  | 2.21E-02 | 6.47   | 6.00  | 2.81E-01 | 5.71    | 11.53  | 6.21E-01 | 37.56  | 11.51 | 1.10E-03 | 17.00  | 8.86  | 5.49E-02 |
| cg04323069 | -42.05 | 18.38 | 2.21E-02 | -94.09 | 45.55 | 3.88E-02 | -109.92 | 155.55 | 4.80E-01 | -37.74 | 21.46 | 7.86E-02 | 27.75  | 61.36 | 6.51E-01 |
| cg02580045 | -13.37 | 5.85  | 2.21E-02 | -19.22 | 9.52  | 4.35E-02 | -15.75  | 13.11  | 2.30E-01 | -9.33  | 14.17 | 5.11E-01 | -5.55  | 11.60 | 6.32E-01 |
| cg12548634 | 15.52  | 6.78  | 2.21E-02 | 16.87  | 9.21  | 6.69E-02 | 26.43   | 37.05  | 4.76E-01 | 26.69  | 28.74 | 3.53E-01 | 10.84  | 11.18 | 3.32E-01 |
| cg04096150 | -8.27  | 3.61  | 2.21E-02 | -14.48 | 9.29  | 1.19E-01 | -21.29  | 14.41  | 1.39E-01 | -5.04  | 4.50  | 2.63E-01 | -10.51 | 9.60  | 2.74E-01 |
| cg26586118 | 14.51  | 6.34  | 2.21E-02 | 19.06  | 12.51 | 1.27E-01 | 0.72    | 23.08  | 9.75E-01 | 10.35  | 6.42  | 1.07E-01 | 51.22  | 23.34 | 2.82E-02 |
| cg05844625 | -13.84 | 6.05  | 2.22E-02 | -21.63 | 8.96  | 1.58E-02 | 1.78    | 11.69  | 8.79E-01 | -3.08  | 17.26 | 8.58E-01 | -21.26 | 10.73 | 4.75E-02 |
| cg11642127 | 17.86  | 7.81  | 2.22E-02 | 7.96   | 13.66 | 5.60E-01 | 29.63   | 14.22  | 3.72E-02 | 24.89  | 20.13 | 2.16E-01 | 11.66  | 16.57 | 4.82E-01 |
| cg19906694 | 23.06  | 10.08 | 2.22E-02 | 26.66  | 25.27 | 2.91E-01 | 79.51   | 99.44  | 4.24E-01 | 16.90  | 10.87 | 1.20E-01 | 88.98  | 42.69 | 3.71E-02 |
| cg03186339 | 16.52  | 7.22  | 2.22E-02 | 5.89   | 11.71 | 6.15E-01 | 18.42   | 16.67  | 2.69E-01 | 25.09  | 14.51 | 8.37E-02 | 24.99  | 16.82 | 1.37E-01 |
| cg16296290 | -32.53 | 14.22 | 2.22E-02 | -7.37  | 41.04 | 8.57E-01 | 172.88  | 181.92 | 3.42E-01 | -43.03 | 16.38 | 8.61E-03 | -2.26  | 41.02 | 9.56E-01 |
| cg08908960 | 21.00  | 9.18  | 2.22E-02 | 22.64  | 16.76 | 1.77E-01 | 18.08   | 15.85  | 2.54E-01 | 23.97  | 22.45 | 2.86E-01 | 20.92  | 20.65 | 3.11E-01 |
| cg00513012 | 19.93  | 8.71  | 2.22E-02 | 12.59  | 16.02 | 4.32E-01 | 21.72   | 16.24  | 1.81E-01 | 12.26  | 16.47 | 4.57E-01 | 47.74  | 23.57 | 4.28E-02 |
| cg05681076 | 17.74  | 7.76  | 2.22E-02 | 19.24  | 10.39 | 6.39E-02 | 29.27   | 18.82  | 1.20E-01 | 33.21  | 31.72 | 2.95E-01 | 0.23   | 16.83 | 9.89E-01 |
| cg20742366 | 26.35  | 11.52 | 2.22E-02 | 26.21  | 21.05 | 2.13E-01 | -12.60  | 32.38  | 6.97E-01 | 28.03  | 17.82 | 1.16E-01 | 53.78  | 29.19 | 6.54E-02 |
| cg26116485 | 14.45  | 6.32  | 2.22E-02 | 19.18  | 12.26 | 1.18E-01 | 0.53    | 16.81  | 9.75E-01 | 23.47  | 10.58 | 2.65E-02 | 3.84   | 13.01 | 7.68E-01 |
| cg25903261 | 11.55  | 5.05  | 2.22E-02 | 11.79  | 7.81  | 1.31E-01 | 9.06    | 8.80   | 3.03E-01 | 4.61   | 16.41 | 7.79E-01 | 20.24  | 12.70 | 1.11E-01 |
| cg14511782 | 5.82   | 2.54  | 2.22E-02 | 5.44   | 3.49  | 1.19E-01 | 5.89    | 6.38   | 3.55E-01 | 10.22  | 6.14  | 9.63E-02 | 1.73   | 6.85  | 8.00E-01 |
| cg10511988 | 16.37  | 7.16  | 2.22E-02 | 13.43  | 11.10 | 2.26E-01 | 39.97   | 26.54  | 1.32E-01 | 34.85  | 25.48 | 1.71E-01 | 11.85  | 10.88 | 2.76E-01 |
| cg19668476 | -12.63 | 5.52  | 2.22E-02 | -7.41  | 9.49  | 4.35E-01 | -14.63  | 14.40  | 3.10E-01 | -17.31 | 9.85  | 7.88E-02 | -12.65 | 12.36 | 3.06E-01 |
| cg11200917 | 7.75   | 3.39  | 2.22E-02 | 6.31   | 5.71  | 2.69E-01 | 11.34   | 11.21  | 3.12E-01 | 5.61   | 5.79  | 3.32E-01 | 12.00  | 7.32  | 1.01E-01 |
| cg02541444 | 6.53   | 2.85  | 2.22E-02 | 9.70   | 3.95  | 1.40E-02 | 5.92    | 6.07   | 3.29E-01 | -0.06  | 8.26  | 9.94E-01 | 1.10   | 7.73  | 8.87E-01 |
| cg04178787 | 11.61  | 5.08  | 2.22E-02 | 22.90  | 11.06 | 3.83E-02 | 11.50   | 12.93  | 3.74E-01 | 12.14  | 8.54  | 1.55E-01 | 2.55   | 9.56  | 7.90E-01 |
| cg11358840 | 14.78  | 6.46  | 2.22E-02 | 13.59  | 16.99 | 4.24E-01 | 0.24    | 32.40  | 9.94E-01 | 14.37  | 7.57  | 5.76E-02 | 27.09  | 22.09 | 2.20E-01 |
| cg16338365 | -3.64  | 1.59  | 2.22E-02 | -3.58  | 2.36  | 1.29E-01 | -3.22   | 3.44   | 3.48E-01 | -3.09  | 4.84  | 5.23E-01 | -4.44  | 3.38  | 1.89E-01 |
| cg00670060 | -13.42 | 5.87  | 2.22E-02 | -28.89 | 16.42 | 7.85E-02 | -0.62   | 23.40  | 9.79E-01 | -10.43 | 6.93  | 1.32E-01 | -24.03 | 19.37 | 2.15E-01 |
| cg19931596 | -13.60 | 5.95  | 2.22E-02 | -37.23 | 16.82 | 2.69E-02 | 8.01    | 30.94  | 7.96E-01 | -9.89  | 6.76  | 1.43E-01 | -24.74 | 23.47 | 2.92E-01 |
| cg14952949 | -9.82  | 4.29  | 2.22E-02 | -11.73 | 5.68  | 3.88E-02 | -19.43  | 11.03  | 7.81E-02 | -6.99  | 17.01 | 6.81E-01 | 1.34   | 9.32  | 8.86E-01 |
| cg11550426 | -41.50 | 18.15 | 2.22E-02 | -54.17 | 22.95 | 1.83E-02 | 59.28   | 81.91  | 4.69E-01 | 3.21   | 48.34 | 9.47E-01 | -59.48 | 42.18 | 1.59E-01 |
| cg03120555 | 7.66   | 3.35  | 2.22E-02 | 4.01   | 5.29  | 4.49E-01 | 12.19   | 6.92   | 7.80E-02 | 5.81   | 7.84  | 4.59E-01 | 11.68  | 7.83  | 1.36E-01 |
| cg09411999 | 11.07  | 4.84  | 2.22E-02 | 16.91  | 7.02  | 1.60E-02 | 7.67    | 12.50  | 5.40E-01 | 9.25   | 10.51 | 3.79E-01 | -0.52  | 12.02 | 9.66E-01 |
| cg00318865 | 33.04  | 14.45 | 2.22E-02 | 50.65  | 22.28 | 2.30E-02 | 47.14   | 46.53  | 3.11E-01 | 37.97  | 33.91 | 2.63E-01 | 0.98   | 26.32 | 9.70E-01 |
| cg07116163 | -22.80 | 9.97  | 2.22E-02 | -21.07 | 11.15 | 5.89E-02 | 19.08   | 49.44  | 7.00E-01 | -62.96 | 59.12 | 2.87E-01 | -37.56 | 27.48 | 1.72E-01 |
| cg25773246 | 31.58  | 13.81 | 2.22E-02 | 36.95  | 21.37 | 8.39E-02 | 49.88   | 36.81  | 1.75E-01 | 12.87  | 33.11 | 6.98E-01 | 25.76  | 26.70 | 3.35E-01 |



|               |        |       |          |        |       |          |        |        |          |        |       |          |        |       |          |
|---------------|--------|-------|----------|--------|-------|----------|--------|--------|----------|--------|-------|----------|--------|-------|----------|
| cg18422875    | 27.86  | 12.18 | 2.22E-02 | 30.50  | 19.34 | 1.15E-01 | -20.57 | 68.22  | 7.63E-01 | 90.42  | 50.35 | 7.25E-02 | 21.68  | 17.02 | 2.03E-01 |
| cg22833175    | -10.25 | 4.48  | 2.22E-02 | -7.38  | 10.83 | 4.95E-01 | -18.58 | 15.20  | 2.22E-01 | -6.89  | 5.67  | 2.24E-01 | -26.41 | 13.18 | 4.52E-02 |
| cg17967292    | -7.46  | 3.26  | 2.22E-02 | -10.80 | 5.10  | 3.42E-02 | -7.10  | 6.14   | 2.47E-01 | 0.00   | 9.37  | 1.00E+00 | -5.52  | 7.51  | 4.63E-01 |
| cg03792964    | -9.85  | 4.31  | 2.22E-02 | -16.16 | 8.88  | 6.89E-02 | 1.39   | 10.90  | 8.99E-01 | -10.22 | 6.71  | 1.28E-01 | -10.46 | 9.72  | 2.82E-01 |
| cg15520042    | -20.32 | 8.89  | 2.22E-02 | 15.70  | 27.70 | 5.71E-01 | 62.96  | 131.87 | 6.33E-01 | -25.11 | 9.70  | 9.63E-03 | -21.59 | 38.70 | 5.77E-01 |
| cg11547355    | -38.71 | 16.93 | 2.22E-02 | -44.38 | 28.01 | 1.13E-01 | -54.59 | 111.56 | 6.25E-01 | -35.50 | 24.90 | 1.54E-01 | -32.32 | 43.87 | 4.61E-01 |
| cg01165997    | -10.36 | 4.53  | 2.22E-02 | -13.68 | 8.58  | 1.11E-01 | -7.36  | 10.86  | 4.98E-01 | -8.64  | 7.50  | 2.50E-01 | -11.57 | 10.59 | 2.75E-01 |
| cg22732812    | 22.95  | 10.04 | 2.22E-02 | 66.56  | 44.95 | 1.39E-01 | 29.96  | 166.40 | 8.57E-01 | 17.97  | 10.64 | 9.12E-02 | 62.04  | 42.08 | 1.40E-01 |
| cg09956907    | 19.06  | 8.34  | 2.22E-02 | 10.78  | 11.32 | 3.41E-01 | 8.61   | 21.42  | 6.88E-01 | 46.61  | 32.29 | 1.49E-01 | 36.79  | 17.05 | 3.09E-02 |
| cg07232711    | -13.40 | 5.86  | 2.22E-02 | -20.15 | 12.13 | 9.67E-02 | -4.69  | 18.69  | 8.02E-01 | -12.65 | 7.66  | 9.86E-02 | -9.97  | 20.32 | 6.24E-01 |
| cg19016652    | 14.79  | 6.47  | 2.22E-02 | 24.55  | 11.54 | 3.33E-02 | 12.73  | 18.13  | 4.82E-01 | 21.14  | 13.95 | 1.30E-01 | 2.64   | 11.04 | 8.11E-01 |
| cg07150506    | 27.48  | 12.02 | 2.22E-02 | 30.13  | 28.45 | 2.90E-01 | -55.74 | 159.26 | 7.26E-01 | 27.04  | 13.72 | 4.88E-02 | 34.59  | 54.78 | 5.28E-01 |
| cg11126205    | -10.98 | 4.80  | 2.22E-02 | -9.64  | 15.06 | 5.22E-01 | -12.33 | 25.32  | 6.26E-01 | -11.20 | 5.37  | 3.70E-02 | -9.52  | 19.20 | 6.20E-01 |
| cg10118925    | -53.95 | 23.60 | 2.22E-02 | -56.62 | 29.33 | 5.36E-02 | -3.03  | 87.78  | 9.72E-01 | -0.21  | 96.85 | 9.98E-01 | -77.28 | 50.23 | 1.24E-01 |
| cg19625388    | -31.02 | 13.57 | 2.23E-02 | -22.49 | 19.72 | 2.54E-01 | -7.82  | 63.39  | 9.02E-01 | -21.10 | 37.38 | 5.72E-01 | -49.42 | 22.98 | 3.15E-02 |
| cg21819604    | 25.28  | 11.06 | 2.23E-02 | 27.26  | 14.26 | 5.59E-02 | 4.91   | 45.40  | 9.14E-01 | 40.24  | 67.40 | 5.50E-01 | 24.06  | 19.80 | 2.24E-01 |
| cg17001101    | 27.65  | 12.10 | 2.23E-02 | 13.31  | 28.15 | 6.36E-01 | 14.32  | 67.39  | 8.32E-01 | 34.70  | 14.74 | 1.85E-02 | 12.37  | 36.62 | 7.36E-01 |
| cg11152463    | 11.46  | 5.01  | 2.23E-02 | 10.08  | 8.29  | 2.24E-01 | 6.40   | 10.27  | 5.33E-01 | 16.51  | 13.24 | 2.12E-01 | 15.38  | 9.99  | 1.24E-01 |
| cg05936283    | 20.57  | 9.00  | 2.23E-02 | 23.74  | 16.12 | 1.41E-01 | 15.27  | 15.57  | 3.27E-01 | 16.44  | 19.31 | 3.95E-01 | 32.82  | 24.29 | 1.77E-01 |
| cg03092447    | 22.80  | 9.97  | 2.23E-02 | 23.80  | 16.94 | 1.60E-01 | 16.90  | 19.06  | 3.75E-01 | 13.66  | 20.78 | 5.11E-01 | 45.42  | 25.82 | 7.85E-02 |
| cg22350910    | 14.89  | 6.52  | 2.23E-02 | 5.76   | 10.39 | 5.80E-01 | 16.00  | 13.72  | 2.44E-01 | 10.44  | 11.50 | 3.64E-01 | 38.14  | 14.91 | 1.05E-02 |
| cg02019444    | 7.05   | 3.08  | 2.23E-02 | 3.56   | 4.06  | 3.81E-01 | 14.29  | 7.38   | 5.29E-02 | 17.35  | 10.95 | 1.13E-01 | 6.62   | 7.47  | 3.75E-01 |
| cg00354884    | -19.38 | 8.48  | 2.23E-02 | -23.28 | 14.35 | 1.05E-01 | -16.50 | 17.01  | 3.32E-01 | -2.59  | 19.86 | 8.96E-01 | -30.34 | 18.06 | 9.29E-02 |
| cg02268354    | 26.06  | 11.40 | 2.23E-02 | 52.13  | 37.03 | 1.59E-01 | -2.49  | 126.81 | 9.84E-01 | 19.85  | 12.42 | 1.10E-01 | 80.42  | 48.65 | 9.83E-02 |
| cg27497928    | -10.15 | 4.44  | 2.23E-02 | -13.91 | 6.25  | 2.61E-02 | -10.17 | 11.03  | 3.57E-01 | 0.87   | 13.57 | 9.49E-01 | -6.97  | 9.34  | 4.55E-01 |
| cg21029964    | 6.96   | 3.04  | 2.23E-02 | 10.31  | 6.40  | 1.07E-01 | 8.69   | 7.56   | 2.50E-01 | 5.11   | 4.36  | 2.41E-01 | 5.83   | 8.62  | 4.99E-01 |
| cg12868707    | -11.91 | 5.21  | 2.23E-02 | -24.11 | 8.55  | 4.78E-03 | 4.47   | 15.23  | 7.69E-01 | -7.36  | 5.85  | 2.08E-01 | -14.66 | 12.03 | 2.23E-01 |
| ch.16.785175F | -44.03 | 19.27 | 2.23E-02 | -24.59 | 26.16 | 3.47E-01 | 38.70  | 64.15  | 5.46E-01 | -72.76 | 33.99 | 3.23E-02 | -72.17 | 34.74 | 3.77E-02 |
| cg24421094    | 6.23   | 2.72  | 2.23E-02 | 7.25   | 6.13  | 2.37E-01 | 10.91  | 6.35   | 8.59E-02 | 5.53   | 3.83  | 1.49E-01 | -0.06  | 8.09  | 9.94E-01 |
| cg16459364    | 21.50  | 9.41  | 2.23E-02 | 8.89   | 19.74 | 6.52E-01 | 13.88  | 23.95  | 5.62E-01 | 32.61  | 14.86 | 2.82E-02 | 19.60  | 20.17 | 3.31E-01 |
| cg12297625    | -13.29 | 5.81  | 2.23E-02 | -19.42 | 9.87  | 4.91E-02 | -1.65  | 10.55  | 8.76E-01 | -3.54  | 15.88 | 8.23E-01 | -25.88 | 12.53 | 3.89E-02 |
| cg03729204    | -12.14 | 5.31  | 2.23E-02 | -11.03 | 8.11  | 1.74E-01 | -7.86  | 13.80  | 5.69E-01 | -15.73 | 13.69 | 2.50E-01 | -14.25 | 10.20 | 1.62E-01 |
| cg02207200    | 20.96  | 9.17  | 2.23E-02 | 29.78  | 11.40 | 9.00E-03 | 15.69  | 26.65  | 5.56E-01 | 51.86  | 34.13 | 1.29E-01 | -0.70  | 16.21 | 9.66E-01 |
| cg19223411    | 20.96  | 9.17  | 2.23E-02 | 18.59  | 16.47 | 2.59E-01 | 11.99  | 18.05  | 5.07E-01 | 23.91  | 18.28 | 1.91E-01 | 33.78  | 21.62 | 1.18E-01 |
| cg06501113    | -20.38 | 8.92  | 2.23E-02 | -9.28  | 10.70 | 3.86E-01 | -50.94 | 25.31  | 4.41E-02 | -40.37 | 25.63 | 1.15E-01 | -23.62 | 21.20 | 2.65E-01 |

|            |        |       |          |        |       |          |         |        |          |        |       |          |        |       |          |
|------------|--------|-------|----------|--------|-------|----------|---------|--------|----------|--------|-------|----------|--------|-------|----------|
| cg04043455 | 2.33   | 1.02  | 2.23E-02 | 2.43   | 1.47  | 9.83E-02 | 3.97    | 1.99   | 4.60E-02 | -1.69  | 3.72  | 6.49E-01 | 1.36   | 2.39  | 5.71E-01 |
| cg21619825 | 18.78  | 8.22  | 2.23E-02 | 24.90  | 20.15 | 2.17E-01 | 29.98   | 23.45  | 2.01E-01 | 12.92  | 10.12 | 2.02E-01 | 47.50  | 36.29 | 1.91E-01 |
| cg03735888 | 25.05  | 10.96 | 2.23E-02 | -9.05  | 33.72 | 7.88E-01 | 39.73   | 150.53 | 7.92E-01 | 32.93  | 12.16 | 6.79E-03 | -12.14 | 39.43 | 7.58E-01 |
| cg13286116 | 5.45   | 2.39  | 2.23E-02 | 5.54   | 3.13  | 7.63E-02 | 11.06   | 6.60   | 9.37E-02 | -3.71  | 8.87  | 6.75E-01 | 4.89   | 5.16  | 3.43E-01 |
| cg05761564 | 14.45  | 6.32  | 2.23E-02 | 31.95  | 15.54 | 3.98E-02 | -6.39   | 37.71  | 8.65E-01 | 11.43  | 7.46  | 1.26E-01 | 12.88  | 21.31 | 5.46E-01 |
| cg17067190 | 20.81  | 9.11  | 2.23E-02 | 31.90  | 30.40 | 2.94E-01 | -72.21  | 152.95 | 6.37E-01 | 20.33  | 9.94  | 4.07E-02 | 16.90  | 35.38 | 6.33E-01 |
| cg14238959 | 15.07  | 6.60  | 2.23E-02 | 18.42  | 10.37 | 7.58E-02 | 6.51    | 30.98  | 8.34E-01 | 13.02  | 10.73 | 2.25E-01 | 13.98  | 15.89 | 3.79E-01 |
| cg14955617 | 23.10  | 10.11 | 2.23E-02 | 16.86  | 18.76 | 3.69E-01 | 35.71   | 20.32  | 7.88E-02 | 20.07  | 19.33 | 2.99E-01 | 20.54  | 23.29 | 3.78E-01 |
| cg23244463 | -14.59 | 6.39  | 2.23E-02 | -8.36  | 12.71 | 5.11E-01 | 15.00   | 27.07  | 5.80E-01 | -19.95 | 8.35  | 1.68E-02 | -15.38 | 19.58 | 4.32E-01 |
| cg04999691 | 14.71  | 6.44  | 2.23E-02 | 14.49  | 9.43  | 1.24E-01 | 19.18   | 13.61  | 1.59E-01 | 23.50  | 18.14 | 1.95E-01 | 3.83   | 14.99 | 7.98E-01 |
| cg09259004 | 37.78  | 16.53 | 2.23E-02 | -4.68  | 28.88 | 8.71E-01 | -26.56  | 122.12 | 8.28E-01 | 50.24  | 12.58 | 6.48E-05 | 73.46  | 48.07 | 1.26E-01 |
| cg24188163 | 7.92   | 3.47  | 2.23E-02 | 7.68   | 7.25  | 2.89E-01 | 19.36   | 8.38   | 2.09E-02 | 5.94   | 4.79  | 2.15E-01 | -3.40  | 12.56 | 7.87E-01 |
| cg06138468 | -11.08 | 4.85  | 2.23E-02 | -12.89 | 13.67 | 3.46E-01 | 20.49   | 21.40  | 3.38E-01 | -13.89 | 5.61  | 1.33E-02 | -1.67  | 17.67 | 9.25E-01 |
| cg08457011 | 13.74  | 6.01  | 2.23E-02 | 26.33  | 22.33 | 2.38E-01 | 17.54   | 17.37  | 3.13E-01 | 18.57  | 7.86  | 1.82E-02 | -5.05  | 12.73 | 6.92E-01 |
| cg03711717 | -15.22 | 6.66  | 2.23E-02 | -28.00 | 16.41 | 8.79E-02 | -18.09  | 28.52  | 5.26E-01 | -11.29 | 7.99  | 1.58E-01 | -20.72 | 22.81 | 3.64E-01 |
| cg23181482 | -15.12 | 6.62  | 2.23E-02 | -25.14 | 18.19 | 1.67E-01 | -37.19  | 38.81  | 3.38E-01 | -13.45 | 7.62  | 7.74E-02 | -6.66  | 22.89 | 7.71E-01 |
| cg17047829 | -8.99  | 3.93  | 2.23E-02 | -18.38 | 10.23 | 7.23E-02 | 8.97    | 14.20  | 5.28E-01 | -8.25  | 4.68  | 7.78E-02 | -16.54 | 15.10 | 2.73E-01 |
| cg17130032 | -16.93 | 7.41  | 2.23E-02 | -33.47 | 15.76 | 3.36E-02 | 29.40   | 52.99  | 5.79E-01 | -9.14  | 9.79  | 3.50E-01 | -26.19 | 17.20 | 1.28E-01 |
| cg09304006 | -37.03 | 16.21 | 2.23E-02 | -35.90 | 18.97 | 5.84E-02 | -113.35 | 114.14 | 3.21E-01 | 6.48   | 67.74 | 9.24E-01 | -46.23 | 36.91 | 2.10E-01 |
| cg17533563 | -10.62 | 4.65  | 2.23E-02 | -15.41 | 11.79 | 1.91E-01 | -12.60  | 22.05  | 5.68E-01 | -8.01  | 5.52  | 1.46E-01 | -21.98 | 15.51 | 1.56E-01 |
| cg11254700 | 7.35   | 3.22  | 2.23E-02 | 5.69   | 5.03  | 2.58E-01 | 14.33   | 6.63   | 3.08E-02 | 11.30  | 8.46  | 1.82E-01 | 0.11   | 6.98  | 9.87E-01 |
| cg06211550 | -3.47  | 1.52  | 2.23E-02 | -4.11  | 2.19  | 6.10E-02 | -2.95   | 3.23   | 3.62E-01 | -3.55  | 4.51  | 4.30E-01 | -2.39  | 3.54  | 4.99E-01 |
| cg15096829 | -33.87 | 14.83 | 2.23E-02 | -27.56 | 21.51 | 2.00E-01 | 20.09   | 63.96  | 7.53E-01 | -41.27 | 27.46 | 1.33E-01 | -54.73 | 35.00 | 1.18E-01 |
| cg12402129 | -9.23  | 4.04  | 2.23E-02 | -8.37  | 7.28  | 2.50E-01 | -18.88  | 8.75   | 3.10E-02 | -11.79 | 10.90 | 2.79E-01 | -2.94  | 6.92  | 6.71E-01 |
| cg06786349 | -17.18 | 7.52  | 2.23E-02 | -23.95 | 17.49 | 1.71E-01 | -23.51  | 39.24  | 5.49E-01 | -16.89 | 9.17  | 6.56E-02 | -5.06  | 23.10 | 8.27E-01 |
| cg24077501 | 25.58  | 11.20 | 2.23E-02 | 40.14  | 18.04 | 2.61E-02 | 11.96   | 40.78  | 7.69E-01 | 25.86  | 24.35 | 2.88E-01 | 11.41  | 19.57 | 5.60E-01 |
| cg16615211 | 8.66   | 3.79  | 2.24E-02 | 9.89   | 5.27  | 6.06E-02 | 14.56   | 8.31   | 7.99E-02 | 6.35   | 14.58 | 6.63E-01 | 0.41   | 8.33  | 9.60E-01 |
| cg14805890 | 7.79   | 3.41  | 2.24E-02 | 8.40   | 6.34  | 1.85E-01 | -2.11   | 7.55   | 7.80E-01 | 10.94  | 5.64  | 5.23E-02 | 12.76  | 9.13  | 1.62E-01 |
| cg14443182 | -14.64 | 6.41  | 2.24E-02 | -25.22 | 9.64  | 8.92E-03 | -7.61   | 13.15  | 5.63E-01 | -3.15  | 18.00 | 8.61E-01 | -6.67  | 14.53 | 6.46E-01 |
| cg22199658 | 19.24  | 8.42  | 2.24E-02 | 70.59  | 32.26 | 2.86E-02 | 4.27    | 82.75  | 9.59E-01 | 16.06  | 10.65 | 1.31E-01 | 14.66  | 15.49 | 3.44E-01 |
| cg22940372 | -8.88  | 3.89  | 2.24E-02 | -17.53 | 7.38  | 1.75E-02 | -7.71   | 12.85  | 5.48E-01 | -4.76  | 5.50  | 3.87E-01 | -7.07  | 10.72 | 5.09E-01 |
| cg25943821 | 14.57  | 6.38  | 2.24E-02 | 17.24  | 17.46 | 3.23E-01 | 41.58   | 27.56  | 1.31E-01 | 11.09  | 7.35  | 1.31E-01 | 28.48  | 26.30 | 2.79E-01 |
| cg22561757 | -14.67 | 6.42  | 2.24E-02 | -21.80 | 12.54 | 8.22E-02 | -30.01  | 15.45  | 5.21E-02 | -9.99  | 9.75  | 3.06E-01 | 4.26   | 17.71 | 8.10E-01 |
| cg14537247 | -8.08  | 3.54  | 2.24E-02 | -10.29 | 8.36  | 2.18E-01 | -4.77   | 12.72  | 7.08E-01 | -6.79  | 4.49  | 1.31E-01 | -13.45 | 10.08 | 1.82E-01 |
| cg01315916 | 11.35  | 4.97  | 2.24E-02 | 18.14  | 8.78  | 3.89E-02 | 7.16    | 13.82  | 6.04E-01 | 10.75  | 9.64  | 2.65E-01 | 6.18   | 9.31  | 5.07E-01 |

|            |        |       |          |         |       |          |         |        |          |         |       |          |        |       |          |
|------------|--------|-------|----------|---------|-------|----------|---------|--------|----------|---------|-------|----------|--------|-------|----------|
| cg23273465 | -23.17 | 10.14 | 2.24E-02 | 4.55    | 26.36 | 8.63E-01 | -59.15  | 62.66  | 3.45E-01 | -30.93  | 11.71 | 8.24E-03 | 12.39  | 37.04 | 7.38E-01 |
| cg11552853 | -15.79 | 6.91  | 2.24E-02 | -24.90  | 20.50 | 2.24E-01 | -17.69  | 25.85  | 4.94E-01 | -12.17  | 7.98  | 1.27E-01 | -39.57 | 27.15 | 1.45E-01 |
| cg21874404 | -9.63  | 4.22  | 2.24E-02 | -1.63   | 8.68  | 8.51E-01 | -4.77   | 17.49  | 7.85E-01 | -11.62  | 5.55  | 3.61E-02 | -17.64 | 11.82 | 1.35E-01 |
| cg08388004 | 31.84  | 13.94 | 2.24E-02 | 60.00   | 24.16 | 1.30E-02 | 41.77   | 52.71  | 4.28E-01 | 9.33    | 16.94 | 5.82E-01 | 49.50  | 34.84 | 1.55E-01 |
| cg17341174 | 6.44   | 2.82  | 2.24E-02 | 8.46    | 4.19  | 4.34E-02 | 8.86    | 7.37   | 2.30E-01 | 7.64    | 5.48  | 1.63E-01 | -5.21  | 7.64  | 4.95E-01 |
| cg26874229 | -4.18  | 1.83  | 2.24E-02 | -3.80   | 2.47  | 1.24E-01 | -1.44   | 4.56   | 7.52E-01 | -2.85   | 5.80  | 6.23E-01 | -8.38  | 4.22  | 4.72E-02 |
| cg24931346 | -14.59 | 6.39  | 2.24E-02 | -15.83  | 9.36  | 9.08E-02 | -24.08  | 14.38  | 9.39E-02 | -10.27  | 16.32 | 5.29E-01 | -4.84  | 14.91 | 7.45E-01 |
| cg20362529 | -27.06 | 11.85 | 2.24E-02 | -14.78  | 16.94 | 3.83E-01 | -5.84   | 30.89  | 8.50E-01 | -60.51  | 27.98 | 3.06E-02 | -44.07 | 27.61 | 1.10E-01 |
| cg19075614 | 31.20  | 13.66 | 2.24E-02 | 31.22   | 19.29 | 1.06E-01 | 56.22   | 39.42  | 1.54E-01 | -20.13  | 38.87 | 6.04E-01 | 44.24  | 27.06 | 1.02E-01 |
| cg03877364 | 31.87  | 13.96 | 2.24E-02 | 43.85   | 17.85 | 1.40E-02 | 8.75    | 80.75  | 9.14E-01 | 28.82   | 59.12 | 6.26E-01 | 10.56  | 25.35 | 6.77E-01 |
| cg04931090 | 28.34  | 12.41 | 2.24E-02 | 34.95   | 16.66 | 3.59E-02 | 33.08   | 33.01  | 3.16E-01 | -11.30  | 61.06 | 8.53E-01 | 18.03  | 24.25 | 4.57E-01 |
| cg06661482 | 38.35  | 16.80 | 2.24E-02 | 43.79   | 45.62 | 3.37E-01 | -44.67  | 213.31 | 8.34E-01 | 33.83   | 19.35 | 8.04E-02 | 68.61  | 51.81 | 1.85E-01 |
| cg05245430 | -37.78 | 16.55 | 2.24E-02 | -44.81  | 23.74 | 5.91E-02 | 54.50   | 94.78  | 5.65E-01 | -46.33  | 31.20 | 1.38E-01 | -22.94 | 36.76 | 5.33E-01 |
| cg19340889 | 19.21  | 8.41  | 2.24E-02 | 32.73   | 14.14 | 2.06E-02 | 42.52   | 23.03  | 6.48E-02 | 13.44   | 15.57 | 3.88E-01 | 3.76   | 12.60 | 7.65E-01 |
| cg10411510 | -20.51 | 8.98  | 2.24E-02 | -11.54  | 16.36 | 4.81E-01 | -83.37  | 37.00  | 2.42E-02 | -20.34  | 9.91  | 4.03E-02 | -9.47  | 27.02 | 7.26E-01 |
| cg18484958 | -10.08 | 4.42  | 2.24E-02 | -16.07  | 9.00  | 7.43E-02 | -5.86   | 12.53  | 6.40E-01 | -7.92   | 6.35  | 2.12E-01 | -10.98 | 11.38 | 3.35E-01 |
| cg07689907 | 20.46  | 8.96  | 2.24E-02 | 28.02   | 12.98 | 3.09E-02 | -1.54   | 28.40  | 9.57E-01 | 37.69   | 30.00 | 2.09E-01 | 11.64  | 15.49 | 4.52E-01 |
| cg06370855 | 19.74  | 8.64  | 2.24E-02 | 32.51   | 18.79 | 8.37E-02 | 38.11   | 24.55  | 1.21E-01 | 7.78    | 10.27 | 4.49E-01 | 45.46  | 28.47 | 1.10E-01 |
| cg08782674 | 12.79  | 5.60  | 2.24E-02 | -2.99   | 16.01 | 8.52E-01 | 34.54   | 29.95  | 2.49E-01 | 14.99   | 6.28  | 1.70E-02 | 0.71   | 25.57 | 9.78E-01 |
| cg12332902 | -14.05 | 6.16  | 2.24E-02 | -7.89   | 7.87  | 3.16E-01 | -37.87  | 15.33  | 1.35E-02 | -6.75   | 12.06 | 5.76E-01 | -18.89 | 13.54 | 1.63E-01 |
| cg01188191 | -16.73 | 7.33  | 2.24E-02 | -13.23  | 11.12 | 2.34E-01 | -14.91  | 20.46  | 4.66E-01 | -16.90  | 16.27 | 2.99E-01 | -24.05 | 15.12 | 1.12E-01 |
| cg14342823 | 16.11  | 7.05  | 2.24E-02 | 27.34   | 16.94 | 1.07E-01 | -6.61   | 34.79  | 8.49E-01 | 12.63   | 8.33  | 1.29E-01 | 37.72  | 26.99 | 1.62E-01 |
| cg07079314 | 15.93  | 6.98  | 2.24E-02 | 15.77   | 21.52 | 4.64E-01 | -5.40   | 33.14  | 8.71E-01 | 14.55   | 7.78  | 6.15E-02 | 60.19  | 32.27 | 6.22E-02 |
| cg02668729 | -38.90 | 17.04 | 2.24E-02 | -46.60  | 22.41 | 3.76E-02 | 11.40   | 66.88  | 8.65E-01 | 0.94    | 60.92 | 9.88E-01 | -45.84 | 32.29 | 1.56E-01 |
| cg09915519 | 18.55  | 8.12  | 2.24E-02 | 33.91   | 21.50 | 1.15E-01 | 59.77   | 38.04  | 1.16E-01 | 14.68   | 9.53  | 1.23E-01 | 3.64   | 27.93 | 8.96E-01 |
| cg15010213 | -53.05 | 23.24 | 2.24E-02 | -46.57  | 31.96 | 1.45E-01 | 18.77   | 147.39 | 8.99E-01 | -104.39 | 51.28 | 4.18E-02 | -30.93 | 47.33 | 5.13E-01 |
| cg12858300 | -74.51 | 32.64 | 2.24E-02 | -185.86 | 72.68 | 1.06E-02 | -160.61 | 258.02 | 5.34E-01 | -63.44  | 28.02 | 2.36E-02 | -5.14  | 67.06 | 9.39E-01 |
| cg12085570 | 13.55  | 5.94  | 2.24E-02 | 13.40   | 14.00 | 3.39E-01 | 33.09   | 17.97  | 6.56E-02 | 18.48   | 9.86  | 6.08E-02 | 2.38   | 10.06 | 8.13E-01 |
| cg21196581 | -14.87 | 6.51  | 2.25E-02 | -21.21  | 9.26  | 2.19E-02 | 2.87    | 24.86  | 9.08E-01 | -7.42   | 11.77 | 5.28E-01 | -17.62 | 18.05 | 3.29E-01 |
| cg05441768 | 11.53  | 5.05  | 2.25E-02 | 14.38   | 7.34  | 5.00E-02 | 21.08   | 13.72  | 1.25E-01 | 10.21   | 15.40 | 5.08E-01 | 2.69   | 9.49  | 7.77E-01 |
| cg17003212 | -36.00 | 15.77 | 2.25E-02 | -44.08  | 19.06 | 2.07E-02 | 35.57   | 54.75  | 5.16E-01 | 18.52   | 67.59 | 7.84E-01 | -54.97 | 37.40 | 1.42E-01 |
| cg00398268 | -9.81  | 4.30  | 2.25E-02 | -21.41  | 11.60 | 6.49E-02 | -0.56   | 22.41  | 9.80E-01 | -6.51   | 5.07  | 1.99E-01 | -20.30 | 13.16 | 1.23E-01 |
| cg26475911 | 7.54   | 3.30  | 2.25E-02 | 8.42    | 4.45  | 5.83E-02 | 13.20   | 8.14   | 1.05E-01 | 2.11    | 10.73 | 8.44E-01 | 2.75   | 7.60  | 7.18E-01 |
| cg11042561 | 6.13   | 2.68  | 2.25E-02 | 7.90    | 3.88  | 4.18E-02 | 3.05    | 7.87   | 6.98E-01 | 11.85   | 6.85  | 8.38E-02 | 0.70   | 5.34  | 8.95E-01 |
| cg27504369 | 13.46  | 5.90  | 2.25E-02 | 7.22    | 8.21  | 3.79E-01 | 28.00   | 12.93  | 3.03E-02 | 15.19   | 18.47 | 4.11E-01 | 13.58  | 14.15 | 3.37E-01 |

|            |        |       |          |        |       |          |         |        |          |        |       |          |        |       |          |
|------------|--------|-------|----------|--------|-------|----------|---------|--------|----------|--------|-------|----------|--------|-------|----------|
| cg25050723 | 16.58  | 7.26  | 2.25E-02 | 31.31  | 13.43 | 1.97E-02 | 0.15    | 16.30  | 9.93E-01 | 12.60  | 11.60 | 2.78E-01 | 20.92  | 21.21 | 3.24E-01 |
| cg19636302 | 7.14   | 3.13  | 2.25E-02 | 6.24   | 4.23  | 1.40E-01 | 10.92   | 7.24   | 1.31E-01 | 15.13  | 11.06 | 1.71E-01 | 2.54   | 7.26  | 7.26E-01 |
| cg02476628 | 21.32  | 9.34  | 2.25E-02 | 29.80  | 16.15 | 6.51E-02 | -1.79   | 18.55  | 9.23E-01 | 22.53  | 19.08 | 2.37E-01 | 37.26  | 22.54 | 9.83E-02 |
| cg14728024 | -7.75  | 3.40  | 2.25E-02 | -7.64  | 4.92  | 1.21E-01 | 1.63    | 9.46   | 8.63E-01 | -14.94 | 6.60  | 2.35E-02 | -2.80  | 9.39  | 7.66E-01 |
| cg00462007 | 13.18  | 5.77  | 2.25E-02 | 14.22  | 11.88 | 2.32E-01 | 13.53   | 35.66  | 7.04E-01 | 18.24  | 7.47  | 1.46E-02 | -10.24 | 15.43 | 5.07E-01 |
| cg04118119 | 6.07   | 2.66  | 2.25E-02 | 7.20   | 3.39  | 3.36E-02 | 10.46   | 7.82   | 1.81E-01 | 2.36   | 7.38  | 7.49E-01 | 0.82   | 7.18  | 9.09E-01 |
| cg11939496 | 5.73   | 2.51  | 2.25E-02 | 4.23   | 3.19  | 1.84E-01 | 12.85   | 6.15   | 3.67E-02 | 4.40   | 7.28  | 5.46E-01 | 4.66   | 8.13  | 5.66E-01 |
| cg05736642 | 13.28  | 5.82  | 2.25E-02 | 26.40  | 13.82 | 5.61E-02 | 12.54   | 17.14  | 4.64E-01 | 12.14  | 7.38  | 9.98E-02 | -4.55  | 19.81 | 8.18E-01 |
| cg08627352 | 15.34  | 6.72  | 2.25E-02 | 18.37  | 9.53  | 5.40E-02 | 4.60    | 27.84  | 8.69E-01 | 11.26  | 29.63 | 7.04E-01 | 13.65  | 10.73 | 2.03E-01 |
| cg27260684 | 5.98   | 2.62  | 2.25E-02 | 5.98   | 3.41  | 7.89E-02 | 12.51   | 6.78   | 6.50E-02 | 2.13   | 7.85  | 7.86E-01 | 2.25   | 6.86  | 7.43E-01 |
| cg21597692 | -14.05 | 6.16  | 2.25E-02 | -23.29 | 10.30 | 2.38E-02 | -6.67   | 16.06  | 6.78E-01 | -8.18  | 10.99 | 4.56E-01 | -12.02 | 14.45 | 4.06E-01 |
| cg01058602 | -15.65 | 6.86  | 2.25E-02 | -27.66 | 19.22 | 1.50E-01 | -53.71  | 31.13  | 8.45E-02 | -12.84 | 7.97  | 1.07E-01 | -0.18  | 23.66 | 9.94E-01 |
| cg16182375 | 10.22  | 4.48  | 2.25E-02 | 16.22  | 9.08  | 7.42E-02 | 9.55    | 13.68  | 4.85E-01 | 6.33   | 5.91  | 2.84E-01 | 21.38  | 16.28 | 1.89E-01 |
| cg20289346 | -26.11 | 11.44 | 2.25E-02 | -16.23 | 24.39 | 5.06E-01 | -276.02 | 151.63 | 6.87E-02 | -25.35 | 13.56 | 6.15E-02 | -40.53 | 38.80 | 2.96E-01 |
| cg07180460 | -38.53 | 16.88 | 2.25E-02 | -47.48 | 22.69 | 3.64E-02 | 9.05    | 95.50  | 9.24E-01 | -41.14 | 75.17 | 5.84E-01 | -28.65 | 27.96 | 3.06E-01 |
| cg11696200 | -18.28 | 8.01  | 2.25E-02 | -20.36 | 15.16 | 1.79E-01 | -1.54   | 28.67  | 9.57E-01 | -21.39 | 11.00 | 5.18E-02 | -10.04 | 23.93 | 6.75E-01 |
| cg09077319 | 9.87   | 4.32  | 2.25E-02 | 5.62   | 6.20  | 3.65E-01 | 11.87   | 9.14   | 1.94E-01 | 7.73   | 12.90 | 5.49E-01 | 20.39  | 10.28 | 4.73E-02 |
| cg06176471 | -19.05 | 8.35  | 2.25E-02 | -42.42 | 16.70 | 1.11E-02 | -10.38  | 19.42  | 5.93E-01 | -8.35  | 9.71  | 3.89E-01 | -29.97 | 20.60 | 1.46E-01 |
| cg00901982 | 5.76   | 2.52  | 2.25E-02 | 5.05   | 3.09  | 1.02E-01 | 11.04   | 5.95   | 6.36E-02 | 5.57   | 11.37 | 6.24E-01 | 1.24   | 7.83  | 8.74E-01 |
| cg09491948 | -29.76 | 13.04 | 2.25E-02 | -10.93 | 25.21 | 6.65E-01 | -94.67  | 143.93 | 5.11E-01 | -41.30 | 16.80 | 1.40E-02 | -9.64  | 37.43 | 7.97E-01 |
| cg12417609 | -6.58  | 2.88  | 2.25E-02 | -9.65  | 5.24  | 6.54E-02 | -6.14   | 8.48   | 4.69E-01 | -5.93  | 4.53  | 1.91E-01 | -3.08  | 6.87  | 6.54E-01 |
| cg14618996 | 21.04  | 9.22  | 2.25E-02 | 22.29  | 14.00 | 1.11E-01 | 43.12   | 25.26  | 8.78E-02 | 34.39  | 25.76 | 1.82E-01 | 3.99   | 16.70 | 8.11E-01 |
| cg26256901 | -7.90  | 3.46  | 2.25E-02 | -4.83  | 4.62  | 2.95E-01 | -17.55  | 8.06   | 2.95E-02 | -3.52  | 10.72 | 7.43E-01 | -10.56 | 8.96  | 2.38E-01 |
| cg18473137 | -12.68 | 5.56  | 2.25E-02 | -7.22  | 8.77  | 4.10E-01 | -6.94   | 22.77  | 7.61E-01 | -13.09 | 11.99 | 2.75E-01 | -20.24 | 9.76  | 3.82E-02 |
| cg12200716 | -11.72 | 5.14  | 2.25E-02 | -19.31 | 7.74  | 1.26E-02 | -8.35   | 11.36  | 4.62E-01 | -1.22  | 17.49 | 9.44E-01 | -5.19  | 9.91  | 6.00E-01 |
| cg23460961 | 10.50  | 4.60  | 2.25E-02 | 15.83  | 5.97  | 8.05E-03 | 4.58    | 10.40  | 6.60E-01 | 14.97  | 22.34 | 5.03E-01 | -2.59  | 11.25 | 8.18E-01 |
| cg21999229 | -5.84  | 2.56  | 2.25E-02 | -4.48  | 3.22  | 1.63E-01 | -7.89   | 6.66   | 2.36E-01 | -12.44 | 10.69 | 2.44E-01 | -6.92  | 6.35  | 2.76E-01 |
| cg13336665 | 7.86   | 3.45  | 2.25E-02 | 1.10   | 3.82  | 7.74E-01 | 9.08    | 5.32   | 8.78E-02 | 15.85  | 10.63 | 1.36E-01 | 13.29  | 5.13  | 9.54E-03 |
| cg06081716 | -33.20 | 14.55 | 2.25E-02 | -41.41 | 17.31 | 1.67E-02 | -34.25  | 78.45  | 6.62E-01 | -30.97 | 67.10 | 6.44E-01 | -6.06  | 31.64 | 8.48E-01 |
| cg26768816 | 45.82  | 20.08 | 2.25E-02 | -27.66 | 63.67 | 6.64E-01 | -70.86  | 268.06 | 7.92E-01 | 51.80  | 22.17 | 1.95E-02 | 86.93  | 73.72 | 2.38E-01 |
| cg15975574 | 22.59  | 9.90  | 2.25E-02 | 36.00  | 15.18 | 1.77E-02 | -3.00   | 24.51  | 9.03E-01 | 55.50  | 33.40 | 9.66E-02 | 12.92  | 14.61 | 3.76E-01 |
| cg20277670 | 17.30  | 7.58  | 2.25E-02 | 12.65  | 21.33 | 5.53E-01 | 3.53    | 31.31  | 9.10E-01 | 21.22  | 8.75  | 1.53E-02 | -7.18  | 30.14 | 8.12E-01 |
| cg08288383 | -22.11 | 9.69  | 2.25E-02 | -26.63 | 13.00 | 4.05E-02 | -18.91  | 22.98  | 4.11E-01 | 26.82  | 39.54 | 4.98E-01 | -26.91 | 21.33 | 2.07E-01 |
| cg03972466 | 12.10  | 5.31  | 2.25E-02 | 17.17  | 8.22  | 3.68E-02 | 14.02   | 13.74  | 3.08E-01 | 13.64  | 10.75 | 2.04E-01 | -2.40  | 12.14 | 8.43E-01 |
| cg17130251 | -13.61 | 5.97  | 2.25E-02 | -30.09 | 9.58  | 1.69E-03 | -0.36   | 13.87  | 9.79E-01 | -8.04  | 6.23  | 1.96E-01 | -13.80 | 11.06 | 2.12E-01 |

|            |        |       |          |        |       |          |         |        |          |        |       |          |        |       |          |
|------------|--------|-------|----------|--------|-------|----------|---------|--------|----------|--------|-------|----------|--------|-------|----------|
| cg27168573 | 15.04  | 6.59  | 2.25E-02 | 28.17  | 10.46 | 7.08E-03 | 5.06    | 13.02  | 6.97E-01 | 10.62  | 14.81 | 4.73E-01 | 3.00   | 17.13 | 8.61E-01 |
| cg05636177 | 28.71  | 12.59 | 2.25E-02 | 50.10  | 36.55 | 1.70E-01 | 10.51   | 134.32 | 9.38E-01 | 27.61  | 14.00 | 4.86E-02 | 5.68   | 49.42 | 9.08E-01 |
| cg26595828 | 15.33  | 6.72  | 2.26E-02 | 26.38  | 15.35 | 8.57E-02 | 6.37    | 30.04  | 8.32E-01 | 8.57   | 9.04  | 3.43E-01 | 25.42  | 14.84 | 8.67E-02 |
| cg07053162 | -19.37 | 8.49  | 2.26E-02 | -4.26  | 15.08 | 7.78E-01 | -25.03  | 22.11  | 2.58E-01 | -18.80 | 13.74 | 1.71E-01 | -46.70 | 21.71 | 3.15E-02 |
| cg02923047 | 21.40  | 9.38  | 2.26E-02 | 35.26  | 19.13 | 6.53E-02 | 6.60    | 16.36  | 6.87E-01 | 19.15  | 18.89 | 3.11E-01 | 32.77  | 21.89 | 1.34E-01 |
| cg07030277 | 25.45  | 11.16 | 2.26E-02 | 31.99  | 15.85 | 4.35E-02 | 33.90   | 30.39  | 2.65E-01 | 34.15  | 38.82 | 3.79E-01 | 7.68   | 20.82 | 7.12E-01 |
| cg04281216 | -42.34 | 18.56 | 2.26E-02 | -20.75 | 26.05 | 4.26E-01 | -127.50 | 77.11  | 9.82E-02 | -21.91 | 52.24 | 6.75E-01 | -70.34 | 33.47 | 3.56E-02 |
| cg07745562 | 21.42  | 9.39  | 2.26E-02 | 44.22  | 19.56 | 2.38E-02 | -4.18   | 34.76  | 9.04E-01 | 12.58  | 12.22 | 3.03E-01 | 38.77  | 28.87 | 1.79E-01 |
| cg06829760 | -15.87 | 6.96  | 2.26E-02 | -22.26 | 7.34  | 2.43E-03 | -9.23   | 13.44  | 4.92E-01 | 3.70   | 12.16 | 7.61E-01 | -30.01 | 12.02 | 1.25E-02 |
| cg03540175 | 7.70   | 3.38  | 2.26E-02 | 2.19   | 4.03  | 5.87E-01 | 11.91   | 5.67   | 3.57E-02 | 17.80  | 7.54  | 1.82E-02 | 4.98   | 6.19  | 4.22E-01 |
| cg25750469 | -39.69 | 17.40 | 2.26E-02 | -79.20 | 34.69 | 2.24E-02 | -47.46  | 86.25  | 5.82E-01 | -25.08 | 22.91 | 2.74E-01 | -25.67 | 48.15 | 5.94E-01 |
| cg23326675 | -21.54 | 9.44  | 2.26E-02 | -32.29 | 32.86 | 3.26E-01 | -51.05  | 140.71 | 7.17E-01 | -18.99 | 10.23 | 6.35E-02 | -40.23 | 38.10 | 2.91E-01 |
| cg01201399 | 11.62  | 5.10  | 2.26E-02 | 13.14  | 6.69  | 4.97E-02 | 10.22   | 8.26   | 2.16E-01 | 20.60  | 6.86  | 2.66E-03 | -10.14 | 12.57 | 4.20E-01 |
| cg17295910 | -18.65 | 8.18  | 2.26E-02 | -39.48 | 17.51 | 2.41E-02 | -9.04   | 20.51  | 6.59E-01 | -10.78 | 7.65  | 1.59E-01 | -47.83 | 28.95 | 9.85E-02 |
| cg27365991 | -11.06 | 4.85  | 2.26E-02 | -16.23 | 8.46  | 5.49E-02 | -11.97  | 10.59  | 2.59E-01 | -1.58  | 9.11  | 8.63E-01 | -15.49 | 11.47 | 1.77E-01 |
| cg16738453 | -14.94 | 6.55  | 2.26E-02 | 13.39  | 20.88 | 5.21E-01 | -16.78  | 26.44  | 5.26E-01 | -18.30 | 7.39  | 1.32E-02 | -15.59 | 28.39 | 5.83E-01 |
| cg03205103 | 19.17  | 8.41  | 2.26E-02 | 33.00  | 34.23 | 3.35E-01 | -45.97  | 122.47 | 7.07E-01 | 17.02  | 9.06  | 6.02E-02 | 37.07  | 30.92 | 2.31E-01 |
| cg04987827 | 53.62  | 23.51 | 2.26E-02 | 15.36  | 47.47 | 7.46E-01 | -9.87   | 178.17 | 9.56E-01 | 81.52  | 20.41 | 6.48E-05 | -11.67 | 59.87 | 8.45E-01 |
| cg14651082 | -18.22 | 7.99  | 2.26E-02 | -14.85 | 12.48 | 2.34E-01 | -14.95  | 15.05  | 3.21E-01 | -48.41 | 18.91 | 1.05E-02 | -5.26  | 15.75 | 7.38E-01 |
| cg03278114 | 23.76  | 10.42 | 2.26E-02 | 18.59  | 20.30 | 3.60E-01 | 21.38   | 18.57  | 2.50E-01 | 23.92  | 22.48 | 2.87E-01 | 33.81  | 22.91 | 1.40E-01 |
| cg08160862 | -57.48 | 25.21 | 2.26E-02 | -68.35 | 33.61 | 4.20E-02 | 63.63   | 125.18 | 6.11E-01 | -67.18 | 63.41 | 2.89E-01 | -46.02 | 51.57 | 3.72E-01 |
| cg04112100 | -9.14  | 4.01  | 2.26E-02 | -5.58  | 8.17  | 4.94E-01 | 0.39    | 17.81  | 9.82E-01 | -10.64 | 5.22  | 4.14E-02 | -12.99 | 11.66 | 2.66E-01 |
| cg07068570 | -12.26 | 5.37  | 2.26E-02 | -2.85  | 12.15 | 8.14E-01 | -13.66  | 16.14  | 3.97E-01 | -16.41 | 6.94  | 1.81E-02 | -3.65  | 17.55 | 8.35E-01 |
| cg12377641 | -17.22 | 7.55  | 2.26E-02 | -21.68 | 15.60 | 1.65E-01 | -3.26   | 26.19  | 9.01E-01 | -16.82 | 10.04 | 9.38E-02 | -20.15 | 22.15 | 3.63E-01 |
| cg18032430 | -12.46 | 5.46  | 2.26E-02 | -3.26  | 13.86 | 8.14E-01 | 11.49   | 20.64  | 5.78E-01 | -16.60 | 6.54  | 1.12E-02 | -15.38 | 19.72 | 4.36E-01 |
| cg00153919 | 6.49   | 2.84  | 2.26E-02 | 5.96   | 4.01  | 1.37E-01 | 10.27   | 7.30   | 1.59E-01 | 7.52   | 6.62  | 2.56E-01 | 3.36   | 7.11  | 6.37E-01 |
| cg26341102 | 49.01  | 21.50 | 2.26E-02 | 28.91  | 29.65 | 3.30E-01 | 89.54   | 82.66  | 2.79E-01 | 106.36 | 63.07 | 9.17E-02 | 53.03  | 39.89 | 1.84E-01 |
| cg20725716 | -24.83 | 10.89 | 2.26E-02 | -53.96 | 18.09 | 2.86E-03 | -0.82   | 16.89  | 9.61E-01 | -29.22 | 13.21 | 2.69E-02 | -13.96 | 20.48 | 4.96E-01 |
| cg24363393 | 17.09  | 7.50  | 2.26E-02 | 8.48   | 14.35 | 5.55E-01 | -4.74   | 24.45  | 8.46E-01 | 26.13  | 10.60 | 1.37E-02 | 16.19  | 20.58 | 4.32E-01 |
| cg18787420 | -10.25 | 4.49  | 2.26E-02 | -17.43 | 7.44  | 1.91E-02 | -15.06  | 10.60  | 1.55E-01 | -2.40  | 9.14  | 7.93E-01 | -2.79  | 9.73  | 7.74E-01 |
| cg17897025 | 31.62  | 13.87 | 2.26E-02 | 29.29  | 16.22 | 7.10E-02 | 109.32  | 66.82  | 1.02E-01 | 62.09  | 63.35 | 3.27E-01 | 14.20  | 32.85 | 6.66E-01 |
| cg17303833 | 12.84  | 5.63  | 2.26E-02 | 20.99  | 9.49  | 2.69E-02 | 7.10    | 14.57  | 6.26E-01 | 11.67  | 11.21 | 2.98E-01 | 5.84   | 11.35 | 6.07E-01 |
| cg03477240 | -12.00 | 5.26  | 2.26E-02 | -8.33  | 14.43 | 5.64E-01 | 1.12    | 25.87  | 9.65E-01 | -11.80 | 6.10  | 5.28E-02 | -26.49 | 18.51 | 1.52E-01 |
| cg08452898 | 40.86  | 17.92 | 2.26E-02 | 32.28  | 48.93 | 5.09E-01 | -221.07 | 222.25 | 3.20E-01 | 41.37  | 20.23 | 4.09E-02 | 73.59  | 65.49 | 2.61E-01 |
| cg14327359 | -18.08 | 7.93  | 2.26E-02 | -46.18 | 23.98 | 5.41E-02 | 7.21    | 28.58  | 8.01E-01 | -17.34 | 9.19  | 5.90E-02 | -9.66  | 30.24 | 7.49E-01 |

|            |        |       |          |        |       |          |         |        |          |        |       |          |        |       |          |
|------------|--------|-------|----------|--------|-------|----------|---------|--------|----------|--------|-------|----------|--------|-------|----------|
| cg02615117 | 27.11  | 11.89 | 2.26E-02 | 32.50  | 14.84 | 2.85E-02 | 75.93   | 48.54  | 1.18E-01 | -52.19 | 68.01 | 4.43E-01 | 12.29  | 22.97 | 5.92E-01 |
| cg07260806 | -9.59  | 4.20  | 2.26E-02 | -14.48 | 8.37  | 8.36E-02 | -3.00   | 14.10  | 8.32E-01 | -8.10  | 5.66  | 1.52E-01 | -11.19 | 12.88 | 3.85E-01 |
| cg03880611 | 17.30  | 7.59  | 2.26E-02 | 46.57  | 20.60 | 2.38E-02 | 32.30   | 25.89  | 2.12E-01 | 11.01  | 8.86  | 2.14E-01 | 4.76   | 32.16 | 8.82E-01 |
| cg13615998 | 9.21   | 4.04  | 2.26E-02 | 5.86   | 6.27  | 3.50E-01 | 8.26    | 10.56  | 4.34E-01 | 8.85   | 8.75  | 3.12E-01 | 16.32  | 8.51  | 5.50E-02 |
| cg17801864 | 8.60   | 3.77  | 2.26E-02 | 8.92   | 5.02  | 7.57E-02 | 17.83   | 11.12  | 1.09E-01 | 3.88   | 8.91  | 6.63E-01 | 5.78   | 10.03 | 5.64E-01 |
| cg16419136 | -56.60 | 24.83 | 2.26E-02 | -71.39 | 33.68 | 3.40E-02 | -127.07 | 92.74  | 1.71E-01 | 39.65  | 77.17 | 6.07E-01 | -45.47 | 46.83 | 3.32E-01 |
| cg11804833 | 24.09  | 10.57 | 2.26E-02 | 50.16  | 18.98 | 8.21E-03 | -19.38  | 34.99  | 5.80E-01 | 23.69  | 13.76 | 8.51E-02 | 14.23  | 18.18 | 4.34E-01 |
| cg06796944 | 14.14  | 6.20  | 2.27E-02 | 0.33   | 15.84 | 9.83E-01 | 78.84   | 53.71  | 1.42E-01 | 17.34  | 6.78  | 1.06E-02 | -4.57  | 24.00 | 8.49E-01 |
| cg21390624 | 18.00  | 7.90  | 2.27E-02 | 20.97  | 11.66 | 7.21E-02 | 13.75   | 19.62  | 4.83E-01 | 23.38  | 20.54 | 2.55E-01 | 11.64  | 16.40 | 4.78E-01 |
| cg02582587 | -15.41 | 6.76  | 2.27E-02 | -34.66 | 20.23 | 8.66E-02 | -10.82  | 38.26  | 7.77E-01 | -11.12 | 7.58  | 1.42E-01 | -38.92 | 27.59 | 1.58E-01 |
| cg21123913 | 23.54  | 10.33 | 2.27E-02 | 26.01  | 18.02 | 1.49E-01 | -6.89   | 30.30  | 8.20E-01 | 31.31  | 17.22 | 6.90E-02 | 23.18  | 23.37 | 3.21E-01 |
| cg25230043 | 92.20  | 40.46 | 2.27E-02 | 39.19  | 54.03 | 4.68E-01 | 364.64  | 204.94 | 7.52E-02 | 147.16 | 87.94 | 9.43E-02 | 109.39 | 75.78 | 1.49E-01 |
| cg19126169 | 52.11  | 22.86 | 2.27E-02 | 27.62  | 21.16 | 1.92E-01 | 140.94  | 53.18  | 8.04E-03 | 53.44  | 56.60 | 3.45E-01 | 45.96  | 47.78 | 3.36E-01 |
| cg27107970 | 36.67  | 16.09 | 2.27E-02 | 46.63  | 22.26 | 3.62E-02 | 71.03   | 45.68  | 1.20E-01 | 35.93  | 43.62 | 4.10E-01 | -6.43  | 34.51 | 8.52E-01 |
| cg15032897 | -13.77 | 6.04  | 2.27E-02 | -17.97 | 8.91  | 4.37E-02 | -6.90   | 15.45  | 6.55E-01 | -36.76 | 22.74 | 1.06E-01 | -5.86  | 10.74 | 5.85E-01 |
| cg06982190 | 16.55  | 7.26  | 2.27E-02 | 25.84  | 9.63  | 7.29E-03 | 17.52   | 15.97  | 2.73E-01 | 31.98  | 20.66 | 1.22E-01 | 0.51   | 10.48 | 9.61E-01 |
| cg04329870 | -11.98 | 5.25  | 2.27E-02 | -16.62 | 8.70  | 5.60E-02 | -18.45  | 13.83  | 1.82E-01 | -12.01 | 11.84 | 3.10E-01 | -3.00  | 9.70  | 7.57E-01 |
| cg18207099 | 45.76  | 20.08 | 2.27E-02 | 43.24  | 26.87 | 1.08E-01 | 29.46   | 56.48  | 6.02E-01 | 44.45  | 61.11 | 4.67E-01 | 63.15  | 44.10 | 1.52E-01 |
| cg24984818 | -53.69 | 23.56 | 2.27E-02 | -62.18 | 30.61 | 4.22E-02 | -110.63 | 99.46  | 2.66E-01 | 3.27   | 62.72 | 9.58E-01 | -52.81 | 51.36 | 3.04E-01 |
| cg13503476 | -11.62 | 5.10  | 2.27E-02 | -15.21 | 8.65  | 7.88E-02 | -7.40   | 11.66  | 5.26E-01 | -13.50 | 9.23  | 1.44E-01 | -5.15  | 12.85 | 6.89E-01 |
| cg07141824 | 28.40  | 12.46 | 2.27E-02 | -6.49  | 25.49 | 7.99E-01 | 7.69    | 170.83 | 9.64E-01 | 43.92  | 13.26 | 9.24E-04 | 17.95  | 28.12 | 5.23E-01 |
| cg06540747 | -17.05 | 7.48  | 2.27E-02 | -25.19 | 10.09 | 1.26E-02 | -8.88   | 16.98  | 6.01E-01 | 32.63  | 36.81 | 3.75E-01 | -13.18 | 16.15 | 4.14E-01 |
| cg19078520 | -34.32 | 15.06 | 2.27E-02 | -22.69 | 43.07 | 5.98E-01 | 147.44  | 150.25 | 3.26E-01 | -44.47 | 17.51 | 1.11E-02 | -1.06  | 42.13 | 9.80E-01 |
| cg11325267 | 12.75  | 5.60  | 2.27E-02 | 18.35  | 9.06  | 4.28E-02 | 2.01    | 12.48  | 8.72E-01 | 21.66  | 15.24 | 1.55E-01 | 8.59   | 10.54 | 4.15E-01 |
| cg22970003 | 5.64   | 2.47  | 2.27E-02 | 3.88   | 3.81  | 3.09E-01 | 10.71   | 6.29   | 8.90E-02 | 6.00   | 5.16  | 2.45E-01 | 4.97   | 5.59  | 3.74E-01 |
| cg13938881 | -38.82 | 17.03 | 2.27E-02 | -30.54 | 23.40 | 1.92E-01 | -175.34 | 126.30 | 1.65E-01 | -25.17 | 68.71 | 7.14E-01 | -45.83 | 27.26 | 9.27E-02 |
| cg21635203 | 12.84  | 5.63  | 2.27E-02 | 13.97  | 6.43  | 2.98E-02 | 11.26   | 32.66  | 7.30E-01 | 4.13   | 46.26 | 9.29E-01 | 9.14   | 12.99 | 4.82E-01 |
| cg04878851 | 10.76  | 4.72  | 2.27E-02 | 16.34  | 8.70  | 6.03E-02 | -11.62  | 14.44  | 4.21E-01 | 13.79  | 6.95  | 4.73E-02 | 7.55   | 11.27 | 5.03E-01 |
| cg21466913 | -13.04 | 5.72  | 2.27E-02 | -24.00 | 16.48 | 1.45E-01 | -14.74  | 22.19  | 5.07E-01 | -9.87  | 6.64  | 1.37E-01 | -26.44 | 21.79 | 2.25E-01 |
| cg06262098 | 14.86  | 6.52  | 2.27E-02 | 16.99  | 9.63  | 7.76E-02 | 19.15   | 13.36  | 1.52E-01 | 23.93  | 17.60 | 1.74E-01 | -4.74  | 16.03 | 7.67E-01 |
| cg20169766 | -18.38 | 8.07  | 2.27E-02 | -27.26 | 19.48 | 1.62E-01 | 22.26   | 34.30  | 5.16E-01 | -15.69 | 9.71  | 1.06E-01 | -49.32 | 27.92 | 7.74E-02 |
| cg16182055 | 24.76  | 10.87 | 2.27E-02 | 39.87  | 31.12 | 2.00E-01 | 61.25   | 119.50 | 6.08E-01 | 21.84  | 12.21 | 7.38E-02 | 26.93  | 38.90 | 4.89E-01 |
| cg21076935 | 19.60  | 8.60  | 2.27E-02 | 39.28  | 17.45 | 2.43E-02 | 20.78   | 28.10  | 4.60E-01 | 8.30   | 12.15 | 4.94E-01 | 24.32  | 21.37 | 2.55E-01 |
| cg12485652 | -12.24 | 5.37  | 2.27E-02 | -11.52 | 8.25  | 1.62E-01 | -6.71   | 12.95  | 6.04E-01 | -7.73  | 18.11 | 6.70E-01 | -17.49 | 9.57  | 6.76E-02 |
| cg19767249 | -16.54 | 7.26  | 2.27E-02 | -7.17  | 11.18 | 5.21E-01 | -34.68  | 26.36  | 1.88E-01 | -39.22 | 43.97 | 3.72E-01 | -20.65 | 10.53 | 4.98E-02 |

|            |        |       |          |        |       |          |        |        |          |        |       |          |        |       |          |
|------------|--------|-------|----------|--------|-------|----------|--------|--------|----------|--------|-------|----------|--------|-------|----------|
| cg12831208 | -13.98 | 6.14  | 2.27E-02 | -27.67 | 10.46 | 8.15E-03 | -8.49  | 14.50  | 5.58E-01 | -4.22  | 13.38 | 7.53E-01 | -7.68  | 11.90 | 5.19E-01 |
| cg04883742 | -38.88 | 17.07 | 2.27E-02 | -30.70 | 45.09 | 4.96E-01 | 36.57  | 183.62 | 8.42E-01 | -43.84 | 19.54 | 2.48E-02 | -15.78 | 58.60 | 7.88E-01 |
| cg18048949 | 23.98  | 10.53 | 2.27E-02 | 9.66   | 28.58 | 7.35E-01 | 26.52  | 115.17 | 8.18E-01 | 27.02  | 11.90 | 2.32E-02 | 17.73  | 38.71 | 6.47E-01 |
| cg15766408 | -19.92 | 8.74  | 2.27E-02 | -9.59  | 21.91 | 6.61E-01 | -21.25 | 41.23  | 6.06E-01 | -20.23 | 10.26 | 4.87E-02 | -39.43 | 33.11 | 2.34E-01 |
| cg22397854 | 30.73  | 13.49 | 2.27E-02 | 34.82  | 15.82 | 2.77E-02 | 35.39  | 68.04  | 6.03E-01 | 44.15  | 61.66 | 4.74E-01 | 10.27  | 31.28 | 7.43E-01 |
| cg19165942 | 23.01  | 10.10 | 2.27E-02 | 31.31  | 20.05 | 1.18E-01 | 48.14  | 20.82  | 2.08E-02 | 5.51   | 13.31 | 6.79E-01 | 29.08  | 29.15 | 3.18E-01 |
| cg21569635 | -9.70  | 4.26  | 2.27E-02 | -13.56 | 6.36  | 3.31E-02 | -6.32  | 11.41  | 5.80E-01 | 3.72   | 15.99 | 8.16E-01 | -8.80  | 7.28  | 2.27E-01 |
| cg09183388 | 33.59  | 14.75 | 2.27E-02 | 16.07  | 16.30 | 3.24E-01 | 39.85  | 63.80  | 5.32E-01 | 5.12   | 78.22 | 9.48E-01 | 67.54  | 23.84 | 4.61E-03 |
| cg18081881 | 35.90  | 15.76 | 2.27E-02 | 26.89  | 18.83 | 1.53E-01 | 65.54  | 72.16  | 3.64E-01 | 24.32  | 54.55 | 6.56E-01 | 70.76  | 38.42 | 6.55E-02 |
| cg07636846 | 27.91  | 12.25 | 2.27E-02 | 44.25  | 19.93 | 2.64E-02 | 15.22  | 35.00  | 6.64E-01 | 17.01  | 28.87 | 5.56E-01 | 19.59  | 21.67 | 3.66E-01 |
| cg10787000 | 65.24  | 28.64 | 2.27E-02 | 90.05  | 37.62 | 1.67E-02 | 268.92 | 201.65 | 1.82E-01 | -9.15  | 67.89 | 8.93E-01 | 41.61  | 60.74 | 4.93E-01 |
| cg00472292 | -43.36 | 19.04 | 2.27E-02 | -54.21 | 23.64 | 2.19E-02 | -23.52 | 106.46 | 8.25E-01 | 62.39  | 84.13 | 4.58E-01 | -39.69 | 36.74 | 2.80E-01 |
| cg04781626 | -22.98 | 10.09 | 2.27E-02 | -25.24 | 17.14 | 1.41E-01 | -19.14 | 20.29  | 3.46E-01 | -30.54 | 19.41 | 1.16E-01 | -9.23  | 27.31 | 7.35E-01 |
| cg09006592 | -26.58 | 11.67 | 2.28E-02 | -4.93  | 40.65 | 9.03E-01 | -36.72 | 208.67 | 8.60E-01 | -27.31 | 12.54 | 2.95E-02 | -49.53 | 52.78 | 3.48E-01 |
| cg07277923 | -9.09  | 3.99  | 2.28E-02 | -22.80 | 10.07 | 2.35E-02 | -2.13  | 17.24  | 9.02E-01 | -8.18  | 4.87  | 9.26E-02 | 0.99   | 11.70 | 9.33E-01 |
| cg25765325 | 35.96  | 15.79 | 2.28E-02 | 34.18  | 41.74 | 4.13E-01 | 123.20 | 205.69 | 5.49E-01 | 38.25  | 17.93 | 3.29E-02 | 8.91   | 57.56 | 8.77E-01 |
| cg02770351 | 15.54  | 6.82  | 2.28E-02 | 12.36  | 13.81 | 3.71E-01 | -5.71  | 17.98  | 7.51E-01 | 18.74  | 9.55  | 4.96E-02 | 37.38  | 21.48 | 8.19E-02 |
| cg05152717 | -48.49 | 21.29 | 2.28E-02 | -72.23 | 25.94 | 5.36E-03 | 2.75   | 81.37  | 9.73E-01 | 5.22   | 74.16 | 9.44E-01 | -2.57  | 50.81 | 9.60E-01 |
| cg19230787 | 13.72  | 6.03  | 2.28E-02 | 15.73  | 20.10 | 4.34E-01 | 1.95   | 27.32  | 9.43E-01 | 11.04  | 7.67  | 1.50E-01 | 22.09  | 12.18 | 6.96E-02 |
| cg11685391 | 12.88  | 5.66  | 2.28E-02 | 17.16  | 7.81  | 2.80E-02 | 9.63   | 15.53  | 5.35E-01 | 10.74  | 15.84 | 4.98E-01 | 5.72   | 12.19 | 6.39E-01 |
| cg14483771 | 13.17  | 5.78  | 2.28E-02 | 12.57  | 17.25 | 4.66E-01 | 12.44  | 18.59  | 5.03E-01 | 16.05  | 6.69  | 1.65E-02 | -31.90 | 27.34 | 2.43E-01 |
| cg00001854 | -11.20 | 4.92  | 2.28E-02 | -22.76 | 14.80 | 1.24E-01 | -46.99 | 39.16  | 2.30E-01 | -9.91  | 5.50  | 7.14E-02 | -0.13  | 18.24 | 9.94E-01 |
| cg25069102 | 18.50  | 8.13  | 2.28E-02 | 18.25  | 14.46 | 2.07E-01 | 27.59  | 19.64  | 1.60E-01 | 27.61  | 14.08 | 4.99E-02 | -6.48  | 19.13 | 7.35E-01 |
| cg14852505 | 12.27  | 5.39  | 2.28E-02 | 11.14  | 11.82 | 3.46E-01 | 0.77   | 15.09  | 9.59E-01 | 16.77  | 7.07  | 1.77E-02 | 1.51   | 18.50 | 9.35E-01 |
| cg03942922 | 13.92  | 6.11  | 2.28E-02 | 17.28  | 10.17 | 8.93E-02 | 14.11  | 50.99  | 7.82E-01 | 10.88  | 7.92  | 1.70E-01 | 34.09  | 35.69 | 3.40E-01 |
| cg05004506 | -11.97 | 5.26  | 2.28E-02 | -15.02 | 8.14  | 6.51E-02 | 1.89   | 12.06  | 8.76E-01 | -13.55 | 13.30 | 3.08E-01 | -16.70 | 10.81 | 1.22E-01 |
| cg25049486 | -8.86  | 3.89  | 2.28E-02 | -16.93 | 7.90  | 3.21E-02 | -21.99 | 14.41  | 1.27E-01 | -5.57  | 5.23  | 2.87E-01 | -0.50  | 10.76 | 9.63E-01 |
| cg09319202 | -23.21 | 10.19 | 2.28E-02 | -37.66 | 29.64 | 2.04E-01 | 2.31   | 133.86 | 9.86E-01 | -22.96 | 11.28 | 4.18E-02 | -0.30  | 41.89 | 9.94E-01 |
| cg19981568 | 14.98  | 6.58  | 2.28E-02 | 21.68  | 19.99 | 2.78E-01 | 50.79  | 85.87  | 5.54E-01 | 13.71  | 7.26  | 5.89E-02 | 16.66  | 25.94 | 5.21E-01 |
| cg01750654 | -10.95 | 4.81  | 2.28E-02 | -13.33 | 9.97  | 1.81E-01 | -1.49  | 13.36  | 9.11E-01 | -11.63 | 6.57  | 7.67E-02 | -13.98 | 15.07 | 3.53E-01 |
| cg16330786 | -13.05 | 5.73  | 2.28E-02 | -19.73 | 9.23  | 3.26E-02 | -5.58  | 11.78  | 6.36E-01 | -11.35 | 16.45 | 4.90E-01 | -10.71 | 11.31 | 3.43E-01 |
| cg21466107 | -18.45 | 8.10  | 2.28E-02 | -24.36 | 12.36 | 4.88E-02 | 9.92   | 17.33  | 5.67E-01 | -24.02 | 12.77 | 5.99E-02 | -31.64 | 22.19 | 1.54E-01 |
| cg03144922 | 12.97  | 5.70  | 2.28E-02 | 20.47  | 11.29 | 6.97E-02 | -2.07  | 13.85  | 8.81E-01 | 12.70  | 11.00 | 2.48E-01 | 15.26  | 10.27 | 1.37E-01 |
| cg19408398 | 5.69   | 2.50  | 2.28E-02 | 5.43   | 4.32  | 2.09E-01 | 4.56   | 5.91   | 4.40E-01 | 7.66   | 4.32  | 7.63E-02 | 3.27   | 6.43  | 6.11E-01 |
| cg03343571 | 3.42   | 1.50  | 2.28E-02 | 2.37   | 2.13  | 2.67E-01 | 5.42   | 3.07   | 7.77E-02 | 5.13   | 4.74  | 2.79E-01 | 2.65   | 3.72  | 4.76E-01 |

|            |        |       |          |        |       |          |         |        |          |        |       |          |        |       |          |
|------------|--------|-------|----------|--------|-------|----------|---------|--------|----------|--------|-------|----------|--------|-------|----------|
| cg24069602 | -9.08  | 3.99  | 2.28E-02 | -8.67  | 5.89  | 1.41E-01 | -7.96   | 11.19  | 4.77E-01 | -6.17  | 8.07  | 4.45E-01 | -15.26 | 9.70  | 1.15E-01 |
| cg00343906 | 5.19   | 2.28  | 2.28E-02 | 4.36   | 2.83  | 1.23E-01 | 7.86    | 6.00   | 1.91E-01 | 8.20   | 7.12  | 2.50E-01 | 3.69   | 7.08  | 6.02E-01 |
| cg08707123 | 22.07  | 9.69  | 2.28E-02 | 13.69  | 18.40 | 4.57E-01 | 17.63   | 21.70  | 4.17E-01 | 23.43  | 15.36 | 1.27E-01 | 43.46  | 27.45 | 1.13E-01 |
| cg01234420 | 8.93   | 3.92  | 2.28E-02 | 9.91   | 5.46  | 6.96E-02 | 13.77   | 8.42   | 1.02E-01 | 5.67   | 11.41 | 6.20E-01 | 1.06   | 10.19 | 9.17E-01 |
| cg09575421 | 15.04  | 6.61  | 2.28E-02 | 7.77   | 11.74 | 5.08E-01 | 13.26   | 12.38  | 2.84E-01 | 16.91  | 12.63 | 1.81E-01 | 33.53  | 18.74 | 7.35E-02 |
| cg21147203 | -10.82 | 4.75  | 2.28E-02 | -11.38 | 8.00  | 1.55E-01 | -5.51   | 10.43  | 5.97E-01 | -18.22 | 9.53  | 5.59E-02 | -5.91  | 10.89 | 5.87E-01 |
| cg25643208 | -8.51  | 3.74  | 2.28E-02 | -7.13  | 7.78  | 3.59E-01 | -10.58  | 12.73  | 4.06E-01 | -10.40 | 5.05  | 3.94E-02 | -1.86  | 10.16 | 8.54E-01 |
| cg00017639 | -6.77  | 2.98  | 2.28E-02 | -7.24  | 5.18  | 1.62E-01 | -8.65   | 7.06   | 2.20E-01 | -3.27  | 5.12  | 5.23E-01 | -11.26 | 7.56  | 1.37E-01 |
| cg08541880 | 22.65  | 9.95  | 2.28E-02 | 22.94  | 23.16 | 3.22E-01 | -40.31  | 45.47  | 3.75E-01 | 26.45  | 12.50 | 3.44E-02 | 26.82  | 27.23 | 3.25E-01 |
| cg03085524 | 6.70   | 2.94  | 2.28E-02 | 10.30  | 4.12  | 1.25E-02 | 2.65    | 7.16   | 7.12E-01 | 9.62   | 8.06  | 2.32E-01 | -1.46  | 6.77  | 8.30E-01 |
| cg13401893 | 2.82   | 1.24  | 2.28E-02 | 1.70   | 1.69  | 3.15E-01 | 4.09    | 2.49   | 1.01E-01 | 5.76   | 4.73  | 2.24E-01 | 3.47   | 3.27  | 2.88E-01 |
| cg24765602 | -8.96  | 3.94  | 2.28E-02 | -11.08 | 5.74  | 5.35E-02 | -12.24  | 8.87   | 1.67E-01 | -2.06  | 11.25 | 8.55E-01 | -5.14  | 8.60  | 5.50E-01 |
| cg25005422 | -36.03 | 15.83 | 2.29E-02 | -39.81 | 41.26 | 3.35E-01 | -157.32 | 175.17 | 3.69E-01 | -35.91 | 18.07 | 4.69E-02 | -17.23 | 56.98 | 7.62E-01 |
| cg11670211 | 25.58  | 11.24 | 2.29E-02 | 42.91  | 17.61 | 1.48E-02 | -8.73   | 28.94  | 7.63E-01 | 23.22  | 32.72 | 4.78E-01 | 20.62  | 19.74 | 2.96E-01 |
| cg23275644 | 6.28   | 2.76  | 2.29E-02 | 5.63   | 3.87  | 1.45E-01 | 6.46    | 7.42   | 3.84E-01 | 9.58   | 5.84  | 1.01E-01 | 2.94   | 7.72  | 7.04E-01 |
| cg01992832 | -16.24 | 7.14  | 2.29E-02 | -9.16  | 18.82 | 6.26E-01 | -27.97  | 25.71  | 2.77E-01 | -14.96 | 8.41  | 7.52E-02 | -33.58 | 29.27 | 2.51E-01 |
| cg22200118 | 14.68  | 6.45  | 2.29E-02 | 4.45   | 14.48 | 7.58E-01 | -17.55  | 27.80  | 5.28E-01 | 20.00  | 8.87  | 2.41E-02 | 19.04  | 13.80 | 1.68E-01 |
| cg20197123 | -14.51 | 6.38  | 2.29E-02 | -10.23 | 18.23 | 5.75E-01 | 15.84   | 32.02  | 6.21E-01 | -17.61 | 7.22  | 1.47E-02 | -2.50  | 26.64 | 9.25E-01 |
| cg24606701 | -13.82 | 6.07  | 2.29E-02 | -19.21 | 13.12 | 1.43E-01 | -3.09   | 19.04  | 8.71E-01 | -13.49 | 8.13  | 9.70E-02 | -14.74 | 17.10 | 3.89E-01 |
| cg22484822 | 14.72  | 6.47  | 2.29E-02 | 20.71  | 13.20 | 1.17E-01 | 14.95   | 10.10  | 1.39E-01 | 21.70  | 14.39 | 1.32E-01 | -5.28  | 16.85 | 7.54E-01 |
| cg04078728 | 22.64  | 9.95  | 2.29E-02 | 15.06  | 19.12 | 4.31E-01 | 17.00   | 27.69  | 5.39E-01 | 24.94  | 15.14 | 9.96E-02 | 33.24  | 24.24 | 1.70E-01 |
| cg01832757 | -15.09 | 6.63  | 2.29E-02 | -9.24  | 12.24 | 4.50E-01 | -16.12  | 15.61  | 3.02E-01 | -17.02 | 11.26 | 1.31E-01 | -19.89 | 15.66 | 2.04E-01 |
| cg06910084 | 14.31  | 6.29  | 2.29E-02 | 5.88   | 8.58  | 4.93E-01 | 20.60   | 14.43  | 1.53E-01 | 48.95  | 28.05 | 8.10E-02 | 21.43  | 13.32 | 1.08E-01 |
| cg07108944 | -16.06 | 7.06  | 2.29E-02 | -45.01 | 20.27 | 2.64E-02 | 13.73   | 47.48  | 7.72E-01 | -11.60 | 7.92  | 1.43E-01 | -26.98 | 28.19 | 3.38E-01 |
| cg24634577 | 14.84  | 6.52  | 2.29E-02 | 17.41  | 20.61 | 3.98E-01 | 26.07   | 25.33  | 3.03E-01 | 11.57  | 7.40  | 1.18E-01 | 41.99  | 27.40 | 1.25E-01 |
| cg15823502 | 9.68   | 4.25  | 2.29E-02 | 4.55   | 6.62  | 4.92E-01 | 11.99   | 8.40   | 1.54E-01 | 21.38  | 11.33 | 5.93E-02 | 9.02   | 9.74  | 3.55E-01 |
| cg05908480 | 12.47  | 5.48  | 2.29E-02 | 29.00  | 12.08 | 1.64E-02 | 22.07   | 31.70  | 4.86E-01 | 9.83   | 5.20  | 5.90E-02 | -8.01  | 19.94 | 6.88E-01 |
| cg20654074 | 16.57  | 7.28  | 2.29E-02 | 20.16  | 10.03 | 4.44E-02 | 33.84   | 20.28  | 9.52E-02 | 15.17  | 18.58 | 4.14E-01 | -4.00  | 16.70 | 8.11E-01 |
| cg00731062 | -8.78  | 3.86  | 2.29E-02 | -10.04 | 7.54  | 1.83E-01 | -1.20   | 13.30  | 9.28E-01 | -11.57 | 5.23  | 2.70E-02 | 2.18   | 11.59 | 8.51E-01 |
| cg22544563 | 24.73  | 10.87 | 2.29E-02 | 34.23  | 13.74 | 1.27E-02 | -36.38  | 45.15  | 4.20E-01 | 35.41  | 47.44 | 4.55E-01 | 13.50  | 21.18 | 5.24E-01 |
| cg19821682 | -12.60 | 5.54  | 2.29E-02 | -17.15 | 9.03  | 5.75E-02 | -11.95  | 13.13  | 3.63E-01 | -4.26  | 11.34 | 7.07E-01 | -14.52 | 12.19 | 2.33E-01 |
| cg26159990 | 15.50  | 6.81  | 2.29E-02 | 22.14  | 11.70 | 5.85E-02 | 2.02    | 16.15  | 9.00E-01 | 14.95  | 12.72 | 2.40E-01 | 17.06  | 15.39 | 2.68E-01 |
| cg17900854 | 13.43  | 5.91  | 2.29E-02 | 34.94  | 27.48 | 2.03E-01 | 56.46   | 56.52  | 3.18E-01 | 13.08  | 6.38  | 4.03E-02 | -0.19  | 20.25 | 9.92E-01 |
| cg13947528 | -17.84 | 7.84  | 2.29E-02 | -17.11 | 12.98 | 1.87E-01 | -4.70   | 16.17  | 7.71E-01 | -21.39 | 19.79 | 2.80E-01 | -29.37 | 15.92 | 6.51E-02 |
| cg03776432 | -25.34 | 11.14 | 2.29E-02 | -26.73 | 16.55 | 1.06E-01 | -22.21  | 26.59  | 4.04E-01 | -51.74 | 35.03 | 1.40E-01 | -15.16 | 21.41 | 4.79E-01 |



|            |        |       |          |        |       |          |         |        |          |        |       |          |         |       |          |
|------------|--------|-------|----------|--------|-------|----------|---------|--------|----------|--------|-------|----------|---------|-------|----------|
| cg07137416 | -14.89 | 6.55  | 2.29E-02 | -13.26 | 11.61 | 2.53E-01 | 11.58   | 24.67  | 6.39E-01 | -19.92 | 9.45  | 3.51E-02 | -14.68  | 18.04 | 4.16E-01 |
| cg26992949 | -9.76  | 4.29  | 2.29E-02 | -20.67 | 9.59  | 3.11E-02 | -17.40  | 18.54  | 3.48E-01 | -7.33  | 5.42  | 1.76E-01 | -0.75   | 12.47 | 9.52E-01 |
| cg19172447 | -17.26 | 7.59  | 2.29E-02 | -25.81 | 12.40 | 3.73E-02 | -24.14  | 22.77  | 2.89E-01 | -1.16  | 14.80 | 9.37E-01 | -18.33  | 15.15 | 2.26E-01 |
| cg05869491 | -9.86  | 4.34  | 2.29E-02 | -18.31 | 7.72  | 1.78E-02 | -2.50   | 10.82  | 8.17E-01 | -6.21  | 7.44  | 4.04E-01 | -8.56   | 10.11 | 3.97E-01 |
| cg21118486 | -11.53 | 5.07  | 2.30E-02 | -20.48 | 10.31 | 4.70E-02 | -14.95  | 15.52  | 3.36E-01 | -8.57  | 7.00  | 2.21E-01 | -3.87   | 14.18 | 7.85E-01 |
| cg18131537 | 35.91  | 15.79 | 2.30E-02 | 63.69  | 41.71 | 1.27E-01 | 7.52    | 154.15 | 9.61E-01 | 37.31  | 18.13 | 3.96E-02 | -18.35  | 53.42 | 7.31E-01 |
| cg15384972 | 25.83  | 11.36 | 2.30E-02 | 32.40  | 18.49 | 7.97E-02 | 17.76   | 22.73  | 4.35E-01 | 6.95   | 17.79 | 6.96E-01 | 67.98   | 28.97 | 1.89E-02 |
| cg14435720 | -18.77 | 8.25  | 2.30E-02 | -32.38 | 16.15 | 4.50E-02 | -21.94  | 28.45  | 4.41E-01 | -16.18 | 19.81 | 4.14E-01 | -11.76  | 11.90 | 3.23E-01 |
| cg02268202 | -20.08 | 8.83  | 2.30E-02 | -29.42 | 15.68 | 6.06E-02 | -23.65  | 19.79  | 2.32E-01 | 1.83   | 17.32 | 9.16E-01 | -29.13  | 18.68 | 1.19E-01 |
| cg00534163 | 9.72   | 4.27  | 2.30E-02 | 13.58  | 6.49  | 3.62E-02 | 14.08   | 9.70   | 1.47E-01 | 6.13   | 8.77  | 4.85E-01 | -2.73   | 11.66 | 8.15E-01 |
| cg25556225 | -5.32  | 2.34  | 2.30E-02 | -6.43  | 3.21  | 4.54E-02 | -2.44   | 4.93   | 6.21E-01 | -4.37  | 9.02  | 6.28E-01 | -6.03   | 5.56  | 2.78E-01 |
| cg02732358 | -29.20 | 12.84 | 2.30E-02 | -2.25  | 43.17 | 9.58E-01 | -191.60 | 186.67 | 3.05E-01 | -27.09 | 13.92 | 5.16E-02 | -91.17  | 54.69 | 9.55E-02 |
| cg27078652 | 22.04  | 9.69  | 2.30E-02 | 41.86  | 35.12 | 2.33E-01 | 20.03   | 162.79 | 9.02E-01 | 23.56  | 10.37 | 2.31E-02 | -38.60  | 44.90 | 3.90E-01 |
| cg00241274 | -15.03 | 6.61  | 2.30E-02 | -10.04 | 18.68 | 5.91E-01 | 11.82   | 41.24  | 7.74E-01 | -19.88 | 7.50  | 8.04E-03 | 18.55   | 24.45 | 4.48E-01 |
| cg19452248 | -9.93  | 4.37  | 2.30E-02 | -6.31  | 11.01 | 5.67E-01 | 1.29    | 18.42  | 9.44E-01 | -8.87  | 5.23  | 8.98E-02 | -32.03  | 14.72 | 2.96E-02 |
| cg04995826 | -16.81 | 7.39  | 2.30E-02 | -28.75 | 11.16 | 9.99E-03 | -17.32  | 20.19  | 3.91E-01 | -9.45  | 15.52 | 5.43E-01 | 1.34    | 16.51 | 9.35E-01 |
| cg15235922 | -12.28 | 5.40  | 2.30E-02 | -28.21 | 11.55 | 1.46E-02 | -8.98   | 16.78  | 5.93E-01 | -7.32  | 7.16  | 3.07E-01 | -9.38   | 16.47 | 5.69E-01 |
| cg15100426 | 7.16   | 3.15  | 2.30E-02 | 6.61   | 4.02  | 9.99E-02 | 11.72   | 7.02   | 9.51E-02 | 10.48  | 12.94 | 4.18E-01 | 0.95    | 8.92  | 9.15E-01 |
| cg06103086 | -6.67  | 2.93  | 2.30E-02 | -3.72  | 4.05  | 3.58E-01 | -16.70  | 7.28   | 2.18E-02 | -3.32  | 8.66  | 7.02E-01 | -8.17   | 6.57  | 2.14E-01 |
| cg00512279 | 19.03  | 8.37  | 2.30E-02 | 24.08  | 13.42 | 7.29E-02 | -0.37   | 23.08  | 9.87E-01 | 11.27  | 21.48 | 6.00E-01 | 24.43   | 14.62 | 9.47E-02 |
| cg26848724 | -55.04 | 24.21 | 2.30E-02 | -36.87 | 29.16 | 2.06E-01 | 60.31   | 96.83  | 5.33E-01 | -67.94 | 43.76 | 1.21E-01 | -120.49 | 52.14 | 2.09E-02 |
| cg00349607 | 13.20  | 5.80  | 2.30E-02 | 9.22   | 13.48 | 4.94E-01 | -9.86   | 41.94  | 8.14E-01 | 17.88  | 7.13  | 1.22E-02 | -1.31   | 15.94 | 9.34E-01 |
| cg00463562 | -20.16 | 8.87  | 2.30E-02 | -31.90 | 12.27 | 9.32E-03 | 7.13    | 22.87  | 7.55E-01 | -1.49  | 29.12 | 9.59E-01 | -18.88  | 18.29 | 3.02E-01 |
| cg13339112 | -38.12 | 16.77 | 2.30E-02 | -31.06 | 39.36 | 4.30E-01 | -79.13  | 148.95 | 5.95E-01 | -42.21 | 19.53 | 3.07E-02 | -5.27   | 64.04 | 9.34E-01 |
| cg18117347 | 11.82  | 5.20  | 2.30E-02 | 7.47   | 6.76  | 2.69E-01 | 23.77   | 12.82  | 6.37E-02 | 43.31  | 26.11 | 9.72E-02 | 8.68    | 11.49 | 4.50E-01 |
| cg07405810 | -8.17  | 3.59  | 2.30E-02 | -7.59  | 5.30  | 1.53E-01 | -12.74  | 9.91   | 1.99E-01 | -8.27  | 8.30  | 3.19E-01 | -6.60   | 7.64  | 3.88E-01 |
| cg02705958 | 5.76   | 2.54  | 2.30E-02 | 6.65   | 3.59  | 6.38E-02 | 6.19    | 5.65   | 2.73E-01 | 7.31   | 5.68  | 1.98E-01 | -2.59   | 8.02  | 7.47E-01 |
| cg15130433 | -28.20 | 12.40 | 2.30E-02 | 6.93   | 26.20 | 7.92E-01 | 25.66   | 81.49  | 7.53E-01 | -41.21 | 15.85 | 9.31E-03 | -36.44  | 33.17 | 2.72E-01 |
| cg19337593 | 42.64  | 18.76 | 2.30E-02 | 64.83  | 42.87 | 1.30E-01 | -107.58 | 181.23 | 5.53E-01 | 39.21  | 22.79 | 8.53E-02 | 40.02   | 54.02 | 4.59E-01 |
| cg19960616 | -7.53  | 3.31  | 2.30E-02 | -4.46  | 6.00  | 4.57E-01 | -13.30  | 12.07  | 2.71E-01 | -10.58 | 4.75  | 2.58E-02 | -0.14   | 9.07  | 9.88E-01 |
| cg10220544 | 5.38   | 2.37  | 2.30E-02 | 6.45   | 3.33  | 5.24E-02 | 6.14    | 6.70   | 3.59E-01 | 7.33   | 4.84  | 1.30E-01 | -3.18   | 6.61  | 6.30E-01 |
| cg18660064 | 8.09   | 3.56  | 2.30E-02 | 8.81   | 4.58  | 5.47E-02 | 15.20   | 9.72   | 1.18E-01 | 10.41  | 14.25 | 4.65E-01 | 0.46    | 7.95  | 9.54E-01 |
| cg00552600 | 34.04  | 14.97 | 2.30E-02 | 1.67   | 16.14 | 9.18E-01 | 60.88   | 18.98  | 1.34E-03 | 26.07  | 22.16 | 2.39E-01 | 54.07   | 23.06 | 1.90E-02 |
| cg13793048 | 22.41  | 9.86  | 2.30E-02 | 13.08  | 15.70 | 4.05E-01 | 34.26   | 19.60  | 8.04E-02 | 30.51  | 21.88 | 1.63E-01 | 15.96   | 25.50 | 5.31E-01 |
| cg04857033 | 10.70  | 4.71  | 2.30E-02 | 16.18  | 6.86  | 1.83E-02 | 5.45    | 10.35  | 5.99E-01 | 9.65   | 14.23 | 4.97E-01 | 4.19    | 10.22 | 6.82E-01 |

|            |        |       |          |        |       |          |        |        |          |         |       |          |        |       |          |
|------------|--------|-------|----------|--------|-------|----------|--------|--------|----------|---------|-------|----------|--------|-------|----------|
| cg18416950 | 10.09  | 4.44  | 2.30E-02 | 13.14  | 7.16  | 6.65E-02 | 6.70   | 17.12  | 6.95E-01 | 9.64    | 6.81  | 1.57E-01 | 4.00   | 12.60 | 7.51E-01 |
| cg07455975 | 38.06  | 16.74 | 2.30E-02 | 47.13  | 22.17 | 3.35E-02 | 24.99  | 51.51  | 6.28E-01 | -1.77   | 44.95 | 9.69E-01 | 47.42  | 38.89 | 2.23E-01 |
| cg04983276 | -8.10  | 3.56  | 2.30E-02 | -6.01  | 5.27  | 2.53E-01 | -0.25  | 8.77   | 9.77E-01 | -13.57  | 10.18 | 1.83E-01 | -14.34 | 7.07  | 4.26E-02 |
| cg18678763 | 17.35  | 7.63  | 2.30E-02 | 14.21  | 10.41 | 1.72E-01 | 30.57  | 19.57  | 1.18E-01 | -4.91   | 24.06 | 8.38E-01 | 26.52  | 16.68 | 1.12E-01 |
| cg05424422 | -11.54 | 5.08  | 2.30E-02 | -16.21 | 8.69  | 6.20E-02 | -2.14  | 10.86  | 8.44E-01 | -7.13   | 10.62 | 5.02E-01 | -18.52 | 11.07 | 9.43E-02 |
| cg11252555 | -11.56 | 5.09  | 2.31E-02 | -18.93 | 7.77  | 1.48E-02 | -3.50  | 15.57  | 8.22E-01 | -11.70  | 12.59 | 3.53E-01 | -3.85  | 9.27  | 6.78E-01 |
| cg12363722 | 8.56   | 3.77  | 2.31E-02 | 14.41  | 6.83  | 3.48E-02 | 6.76   | 8.96   | 4.51E-01 | 8.62    | 7.67  | 2.61E-01 | 3.25   | 7.14  | 6.48E-01 |
| cg12126243 | -7.91  | 3.48  | 2.31E-02 | -14.55 | 8.37  | 8.19E-02 | -12.14 | 16.89  | 4.72E-01 | -6.95   | 4.30  | 1.06E-01 | -2.47  | 9.71  | 7.99E-01 |
| cg08276755 | 8.06   | 3.55  | 2.31E-02 | 6.79   | 5.25  | 1.96E-01 | 8.77   | 9.64   | 3.63E-01 | 12.72   | 6.90  | 6.52E-02 | 2.83   | 9.38  | 7.63E-01 |
| cg23511169 | 24.13  | 10.62 | 2.31E-02 | 51.76  | 33.67 | 1.24E-01 | 4.85   | 149.14 | 9.74E-01 | 21.00   | 11.58 | 6.97E-02 | 23.84  | 45.67 | 6.02E-01 |
| cg17664182 | -13.90 | 6.12  | 2.31E-02 | -22.60 | 9.45  | 1.68E-02 | -2.92  | 13.97  | 8.34E-01 | 0.81    | 16.61 | 9.61E-01 | -15.69 | 12.15 | 1.97E-01 |
| cg17148976 | 12.13  | 5.34  | 2.31E-02 | 8.14   | 8.21  | 3.22E-01 | 28.74  | 12.40  | 2.04E-02 | 17.06   | 10.60 | 1.07E-01 | 1.26   | 10.46 | 9.04E-01 |
| cg03944810 | 32.79  | 14.43 | 2.31E-02 | 39.07  | 16.19 | 1.58E-02 | -5.61  | 92.87  | 9.52E-01 | 45.07   | 50.73 | 3.74E-01 | -17.56 | 45.55 | 7.00E-01 |
| cg13820205 | -12.21 | 5.38  | 2.31E-02 | -2.23  | 9.79  | 8.20E-01 | -13.23 | 12.52  | 2.91E-01 | -19.05  | 9.47  | 4.43E-02 | -15.45 | 12.26 | 2.08E-01 |
| cg05371993 | 27.54  | 12.12 | 2.31E-02 | 20.05  | 14.69 | 1.72E-01 | -15.07 | 64.12  | 8.14E-01 | 73.07   | 31.62 | 2.08E-02 | 27.02  | 32.84 | 4.11E-01 |
| cg08586228 | -37.06 | 16.31 | 2.31E-02 | -28.01 | 20.25 | 1.67E-01 | -40.08 | 97.48  | 6.81E-01 | -101.44 | 66.41 | 1.27E-01 | -44.31 | 31.82 | 1.64E-01 |
| cg05879498 | 16.60  | 7.31  | 2.31E-02 | 14.60  | 10.62 | 1.69E-01 | 54.85  | 26.90  | 4.14E-02 | 31.61   | 25.41 | 2.13E-01 | 8.19   | 12.00 | 4.95E-01 |
| cg23611220 | -12.58 | 5.54  | 2.31E-02 | -24.92 | 14.00 | 7.51E-02 | -14.61 | 18.88  | 4.39E-01 | -9.06   | 6.81  | 1.84E-01 | -14.91 | 17.83 | 4.03E-01 |
| cg12149299 | 10.89  | 4.79  | 2.31E-02 | 13.77  | 7.05  | 5.07E-02 | 18.00  | 11.81  | 1.28E-01 | 8.83    | 10.65 | 4.07E-01 | -1.35  | 11.60 | 9.07E-01 |
| cg22744555 | 12.96  | 5.70  | 2.31E-02 | 15.82  | 16.51 | 3.38E-01 | 17.82  | 21.22  | 4.01E-01 | 10.63   | 6.55  | 1.05E-01 | 34.09  | 25.35 | 1.79E-01 |
| cg01073765 | 9.77   | 4.30  | 2.31E-02 | 7.55   | 8.45  | 3.72E-01 | 19.39  | 10.20  | 5.73E-02 | 6.49    | 6.50  | 3.18E-01 | 12.13  | 12.10 | 3.16E-01 |
| cg21908960 | -10.47 | 4.61  | 2.31E-02 | -12.64 | 10.03 | 2.08E-01 | -15.96 | 18.65  | 3.92E-01 | -11.39  | 5.99  | 5.73E-02 | -0.63  | 12.51 | 9.60E-01 |
| cg14179383 | -12.94 | 5.70  | 2.31E-02 | -23.62 | 9.32  | 1.12E-02 | -7.51  | 19.43  | 6.99E-01 | -3.53   | 9.53  | 7.11E-01 | -12.07 | 13.33 | 3.65E-01 |
| cg02568541 | -69.49 | 30.59 | 2.31E-02 | -36.76 | 41.63 | 3.77E-01 | 22.38  | 138.55 | 8.72E-01 | -159.53 | 67.97 | 1.89E-02 | -88.19 | 66.92 | 1.88E-01 |
| cg11299459 | 9.89   | 4.35  | 2.31E-02 | 16.79  | 6.19  | 6.69E-03 | 4.29   | 13.87  | 7.57E-01 | 1.59    | 9.12  | 8.61E-01 | 4.49   | 10.29 | 6.63E-01 |
| cg24338091 | 15.49  | 6.82  | 2.31E-02 | 15.64  | 10.04 | 1.19E-01 | 21.42  | 13.51  | 1.13E-01 | -6.04   | 18.80 | 7.48E-01 | 23.71  | 17.48 | 1.75E-01 |
| cg26306329 | 8.87   | 3.90  | 2.31E-02 | 7.49   | 5.07  | 1.40E-01 | 17.04  | 10.20  | 9.50E-02 | 21.71   | 12.74 | 8.83E-02 | -0.65  | 9.57  | 9.46E-01 |
| cg14972827 | -9.74  | 4.29  | 2.31E-02 | -20.89 | 9.18  | 2.29E-02 | 4.59   | 16.63  | 7.83E-01 | -10.09  | 5.01  | 4.39E-02 | 1.47   | 11.30 | 8.96E-01 |
| cg19750643 | -13.76 | 6.06  | 2.31E-02 | -24.78 | 10.01 | 1.33E-02 | -5.54  | 12.79  | 6.65E-01 | -7.82   | 13.24 | 5.55E-01 | -8.98  | 13.54 | 5.07E-01 |
| cg23275998 | 40.66  | 17.90 | 2.31E-02 | 22.39  | 23.17 | 3.34E-01 | 58.08  | 70.16  | 4.08E-01 | 83.59   | 58.71 | 1.54E-01 | 64.29  | 36.19 | 7.56E-02 |
| cg10531104 | -10.65 | 4.69  | 2.31E-02 | -25.07 | 9.03  | 5.50E-03 | -10.06 | 12.77  | 4.31E-01 | -5.93   | 5.38  | 2.71E-01 | -4.93  | 11.57 | 6.70E-01 |
| cg02683759 | 16.30  | 7.18  | 2.31E-02 | 28.60  | 15.08 | 5.79E-02 | 16.13  | 19.24  | 4.02E-01 | 14.29   | 13.28 | 2.82E-01 | 9.95   | 12.27 | 4.17E-01 |
| cg23722592 | -12.36 | 5.44  | 2.31E-02 | -3.03  | 14.14 | 8.31E-01 | -11.03 | 24.15  | 6.48E-01 | -12.45  | 6.43  | 5.29E-02 | -28.33 | 18.52 | 1.26E-01 |
| cg16392213 | 20.94  | 9.22  | 2.31E-02 | 48.95  | 30.70 | 1.11E-01 | 21.79  | 48.07  | 6.50E-01 | 21.38   | 10.93 | 5.04E-02 | 3.09   | 22.99 | 8.93E-01 |
| cg20742981 | 16.78  | 7.39  | 2.31E-02 | 28.02  | 9.56  | 3.38E-03 | 9.12   | 19.97  | 6.48E-01 | 25.07   | 13.67 | 6.68E-02 | 0.27   | 11.02 | 9.81E-01 |

|            |        |       |          |         |       |          |         |        |          |        |       |          |        |       |          |
|------------|--------|-------|----------|---------|-------|----------|---------|--------|----------|--------|-------|----------|--------|-------|----------|
| cg21277995 | 39.32  | 17.31 | 2.31E-02 | 63.36   | 42.21 | 1.33E-01 | 236.29  | 218.29 | 2.79E-01 | 33.92  | 20.23 | 9.36E-02 | 25.04  | 56.68 | 6.59E-01 |
| cg21865157 | 70.91  | 31.22 | 2.31E-02 | 81.25   | 44.54 | 6.81E-02 | 271.93  | 154.73 | 7.88E-02 | 24.12  | 88.91 | 7.86E-01 | 49.15  | 53.19 | 3.55E-01 |
| cg10552523 | -8.58  | 3.78  | 2.31E-02 | -3.80   | 5.05  | 4.52E-01 | -12.30  | 9.11   | 1.77E-01 | -21.08 | 15.46 | 1.73E-01 | -14.67 | 8.24  | 7.48E-02 |
| cg00377681 | -12.10 | 5.33  | 2.32E-02 | -12.66  | 7.78  | 1.04E-01 | -14.01  | 13.27  | 2.91E-01 | -7.44  | 12.89 | 5.64E-01 | -13.24 | 11.96 | 2.68E-01 |
| cg07926644 | 20.17  | 8.88  | 2.32E-02 | 45.05   | 18.55 | 1.52E-02 | 21.64   | 18.85  | 2.51E-01 | 7.59   | 13.17 | 5.65E-01 | 16.85  | 28.89 | 5.60E-01 |
| cg03111404 | 12.12  | 5.34  | 2.32E-02 | 10.67   | 7.95  | 1.79E-01 | 13.25   | 12.41  | 2.86E-01 | 17.39  | 17.99 | 3.34E-01 | 12.05  | 10.16 | 2.36E-01 |
| cg08332148 | 17.69  | 7.79  | 2.32E-02 | 20.57   | 12.77 | 1.07E-01 | 15.35   | 13.55  | 2.57E-01 | 7.35   | 17.53 | 6.75E-01 | 35.21  | 24.68 | 1.54E-01 |
| cg07127945 | 18.74  | 8.25  | 2.32E-02 | 29.76   | 18.58 | 1.09E-01 | 64.47   | 89.66  | 4.72E-01 | 14.12  | 10.69 | 1.86E-01 | 19.71  | 18.57 | 2.89E-01 |
| cg10043090 | 10.32  | 4.54  | 2.32E-02 | 13.58   | 6.96  | 5.09E-02 | 13.95   | 9.61   | 1.47E-01 | 5.44   | 11.26 | 6.29E-01 | 2.79   | 10.49 | 7.91E-01 |
| cg27666123 | -10.22 | 4.50  | 2.32E-02 | -10.38  | 12.32 | 3.99E-01 | 4.55    | 21.84  | 8.35E-01 | -12.43 | 5.28  | 1.85E-02 | 0.12   | 14.47 | 9.93E-01 |
| cg02606728 | -34.78 | 15.32 | 2.32E-02 | -2.21   | 27.56 | 9.36E-01 | -66.13  | 37.03  | 7.41E-02 | -50.24 | 26.61 | 5.91E-02 | -32.55 | 35.28 | 3.56E-01 |
| cg02185248 | 8.09   | 3.56  | 2.32E-02 | 9.32    | 5.17  | 7.16E-02 | 18.43   | 9.29   | 4.72E-02 | -3.10  | 10.76 | 7.73E-01 | 4.82   | 6.87  | 4.83E-01 |
| cg15061682 | -11.69 | 5.15  | 2.32E-02 | -14.79  | 10.37 | 1.54E-01 | -11.30  | 13.61  | 4.06E-01 | -11.96 | 7.65  | 1.18E-01 | -6.40  | 12.98 | 6.22E-01 |
| cg18396987 | -6.07  | 2.67  | 2.32E-02 | -8.65   | 4.24  | 4.14E-02 | -7.05   | 5.45   | 1.96E-01 | 0.01   | 7.66  | 9.99E-01 | -3.90  | 5.47  | 4.76E-01 |
| cg04141610 | 27.43  | 12.08 | 2.32E-02 | 36.88   | 35.37 | 2.97E-01 | -216.85 | 157.12 | 1.68E-01 | 27.23  | 13.59 | 4.52E-02 | 33.19  | 40.91 | 4.17E-01 |
| cg13628971 | 20.33  | 8.96  | 2.32E-02 | 42.16   | 28.38 | 1.37E-01 | 15.32   | 110.32 | 8.90E-01 | 19.37  | 9.80  | 4.80E-02 | -2.60  | 37.01 | 9.44E-01 |
| cg26558485 | 9.50   | 4.19  | 2.32E-02 | 17.83   | 7.36  | 1.54E-02 | 8.48    | 9.57   | 3.76E-01 | 6.08   | 9.68  | 5.30E-01 | 3.28   | 7.66  | 6.69E-01 |
| cg24667575 | 7.03   | 3.10  | 2.32E-02 | 7.39    | 4.19  | 7.77E-02 | 8.52    | 6.22   | 1.71E-01 | 0.48   | 12.16 | 9.69E-01 | 6.04   | 8.27  | 4.65E-01 |
| cg17229388 | 10.02  | 4.41  | 2.32E-02 | 15.29   | 5.38  | 4.50E-03 | -6.15   | 12.47  | 6.22E-01 | 4.68   | 6.24  | 4.53E-01 | 18.13  | 9.30  | 5.12E-02 |
| cg26581504 | -17.72 | 7.80  | 2.32E-02 | -27.64  | 20.72 | 1.82E-01 | 20.73   | 27.93  | 4.58E-01 | -17.39 | 9.27  | 6.05E-02 | -43.47 | 29.34 | 1.38E-01 |
| cg24126567 | 11.86  | 5.23  | 2.32E-02 | 11.99   | 10.43 | 2.50E-01 | 18.47   | 8.68   | 3.33E-02 | -2.83  | 11.13 | 7.99E-01 | 16.74  | 12.82 | 1.92E-01 |
| cg01808739 | 14.46  | 6.37  | 2.32E-02 | 15.55   | 7.58  | 4.03E-02 | 8.84    | 20.77  | 6.70E-01 | 21.09  | 31.12 | 4.98E-01 | 11.17  | 15.99 | 4.85E-01 |
| cg15034464 | -49.74 | 21.91 | 2.32E-02 | -110.87 | 47.37 | 1.93E-02 | -245.34 | 209.36 | 2.41E-01 | -33.65 | 23.63 | 1.54E-01 | -22.71 | 57.15 | 6.91E-01 |
| cg09040752 | 18.41  | 8.11  | 2.32E-02 | 17.62   | 12.13 | 1.47E-01 | 35.08   | 15.53  | 2.39E-02 | -4.99  | 21.55 | 8.17E-01 | 12.07  | 21.76 | 5.79E-01 |
| cg03668470 | -22.89 | 10.09 | 2.32E-02 | -32.03  | 14.75 | 2.99E-02 | 21.45   | 37.47  | 5.67E-01 | -32.39 | 25.36 | 2.02E-01 | -14.42 | 18.36 | 4.32E-01 |
| cg16572315 | -50.87 | 22.41 | 2.32E-02 | -36.15  | 28.48 | 2.04E-01 | -145.61 | 106.57 | 1.72E-01 | 35.34  | 85.21 | 6.78E-01 | -91.53 | 43.33 | 3.46E-02 |
| cg04330597 | -15.47 | 6.82  | 2.32E-02 | -11.06  | 11.85 | 3.51E-01 | -2.16   | 18.43  | 9.07E-01 | -23.85 | 13.85 | 8.52E-02 | -19.79 | 12.65 | 1.18E-01 |
| cg12185873 | 11.15  | 4.91  | 2.32E-02 | 8.06    | 6.49  | 2.15E-01 | 16.74   | 11.14  | 1.33E-01 | 8.93   | 25.20 | 7.23E-01 | 15.15  | 11.16 | 1.75E-01 |
| cg21208734 | -14.36 | 6.33  | 2.32E-02 | -9.09   | 9.67  | 3.47E-01 | -18.60  | 15.64  | 2.34E-01 | -36.73 | 16.34 | 2.46E-02 | -7.42  | 12.46 | 5.52E-01 |
| cg27493117 | 21.58  | 9.51  | 2.32E-02 | 46.25   | 22.41 | 3.90E-02 | 26.64   | 23.75  | 2.62E-01 | 10.30  | 12.64 | 4.15E-01 | 33.66  | 31.05 | 2.78E-01 |
| cg13821914 | 30.90  | 13.62 | 2.32E-02 | 40.84   | 21.73 | 6.01E-02 | 30.65   | 27.13  | 2.59E-01 | -6.99  | 34.60 | 8.40E-01 | 41.00  | 30.41 | 1.77E-01 |
| cg08097359 | 13.68  | 6.03  | 2.32E-02 | 14.35   | 7.93  | 7.04E-02 | 38.59   | 17.98  | 3.19E-02 | 17.35  | 17.68 | 3.27E-01 | 1.69   | 10.73 | 8.75E-01 |
| cg23460430 | 11.92  | 5.25  | 2.32E-02 | 10.35   | 7.42  | 1.63E-01 | 7.34    | 11.15  | 5.10E-01 | 31.47  | 17.64 | 7.44E-02 | 12.28  | 12.12 | 3.11E-01 |
| cg06581409 | 9.76   | 4.30  | 2.32E-02 | 13.41   | 9.96  | 1.78E-01 | 17.91   | 15.64  | 2.52E-01 | 5.76   | 5.47  | 2.92E-01 | 19.70  | 12.48 | 1.14E-01 |
| cg24947064 | -16.19 | 7.13  | 2.33E-02 | -3.40   | 21.31 | 8.73E-01 | 13.31   | 34.74  | 7.02E-01 | -18.39 | 7.99  | 2.13E-02 | -34.98 | 32.26 | 2.78E-01 |

|            |        |       |          |        |       |          |         |        |          |        |       |          |        |       |          |
|------------|--------|-------|----------|--------|-------|----------|---------|--------|----------|--------|-------|----------|--------|-------|----------|
| cg23660123 | -10.35 | 4.56  | 2.33E-02 | -7.98  | 9.50  | 4.01E-01 | -11.47  | 8.68   | 1.86E-01 | -11.49 | 7.15  | 1.08E-01 | -7.71  | 15.46 | 6.18E-01 |
| cg06624527 | 32.44  | 14.29 | 2.33E-02 | 54.87  | 15.47 | 3.88E-04 | 55.38   | 26.46  | 3.64E-02 | 4.00   | 10.47 | 7.02E-01 | 29.69  | 17.56 | 9.09E-02 |
| cg19978669 | -31.39 | 13.83 | 2.33E-02 | -29.24 | 15.81 | 6.44E-02 | 52.93   | 84.88  | 5.33E-01 | 37.44  | 75.64 | 6.21E-01 | -67.01 | 33.17 | 4.34E-02 |
| cg19535267 | 20.49  | 9.03  | 2.33E-02 | 17.20  | 22.68 | 4.48E-01 | 15.92   | 24.35  | 5.13E-01 | 15.47  | 11.91 | 1.94E-01 | 51.73  | 25.12 | 3.95E-02 |
| cg18395675 | 28.41  | 12.52 | 2.33E-02 | 24.84  | 16.88 | 1.41E-01 | -21.63  | 37.28  | 5.62E-01 | 48.25  | 31.96 | 1.31E-01 | 53.33  | 29.25 | 6.82E-02 |
| cg08075469 | -55.80 | 24.59 | 2.33E-02 | -77.83 | 31.90 | 1.47E-02 | -111.03 | 104.17 | 2.86E-01 | 35.96  | 64.33 | 5.76E-01 | -42.28 | 54.46 | 4.38E-01 |
| cg13428152 | 25.86  | 11.40 | 2.33E-02 | 28.69  | 17.13 | 9.40E-02 | 3.70    | 31.19  | 9.06E-01 | 51.06  | 30.67 | 9.60E-02 | 19.66  | 21.30 | 3.56E-01 |
| cg05590818 | 7.58   | 3.34  | 2.33E-02 | 9.37   | 4.80  | 5.10E-02 | 11.16   | 7.82   | 1.53E-01 | 9.72   | 11.10 | 3.81E-01 | 0.50   | 6.80  | 9.41E-01 |
| cg22395573 | -40.09 | 17.67 | 2.33E-02 | -50.38 | 22.26 | 2.36E-02 | -95.60  | 61.77  | 1.22E-01 | 34.70  | 64.74 | 5.92E-01 | -14.59 | 38.22 | 7.03E-01 |
| cg21053741 | 14.51  | 6.40  | 2.33E-02 | 12.65  | 9.19  | 1.69E-01 | 34.27   | 14.57  | 1.86E-02 | 5.35   | 15.60 | 7.32E-01 | 5.67   | 16.28 | 7.27E-01 |
| cg07639472 | -30.86 | 13.60 | 2.33E-02 | 14.79  | 45.52 | 7.45E-01 | -247.51 | 167.32 | 1.39E-01 | -32.43 | 14.66 | 2.69E-02 | -61.02 | 65.75 | 3.53E-01 |
| cg16852115 | 34.87  | 15.37 | 2.33E-02 | 41.00  | 18.11 | 2.36E-02 | 109.70  | 90.57  | 2.26E-01 | 71.24  | 92.26 | 4.40E-01 | 0.90   | 32.53 | 9.78E-01 |
| cg00830435 | -38.41 | 16.93 | 2.33E-02 | -27.05 | 16.90 | 1.09E-01 | -0.17   | 40.37  | 9.97E-01 | -94.22 | 29.50 | 1.40E-03 | -29.19 | 25.22 | 2.47E-01 |
| cg10251641 | -43.93 | 19.37 | 2.33E-02 | -51.28 | 28.24 | 6.94E-02 | -46.69  | 63.90  | 4.65E-01 | -17.67 | 43.67 | 6.86E-01 | -49.96 | 39.42 | 2.05E-01 |
| cg19108432 | 34.10  | 15.03 | 2.33E-02 | 8.74   | 37.52 | 8.16E-01 | -84.73  | 179.88 | 6.38E-01 | 41.16  | 17.40 | 1.80E-02 | 29.72  | 51.18 | 5.61E-01 |
| cg21144120 | -6.75  | 2.97  | 2.33E-02 | -10.47 | 4.33  | 1.55E-02 | -2.47   | 6.67   | 7.11E-01 | -7.28  | 8.61  | 3.98E-01 | -2.09  | 6.51  | 7.48E-01 |
| cg13973472 | 15.02  | 6.62  | 2.33E-02 | 8.92   | 7.55  | 2.38E-01 | 37.83   | 54.20  | 4.85E-01 | 34.70  | 15.90 | 2.91E-02 | 36.73  | 31.88 | 2.49E-01 |
| cg23214628 | 9.74   | 4.29  | 2.33E-02 | 5.99   | 6.23  | 3.37E-01 | 10.29   | 7.84   | 1.90E-01 | 9.44   | 18.22 | 6.04E-01 | 19.40  | 10.43 | 6.29E-02 |
| cg18109530 | -9.29  | 4.09  | 2.33E-02 | -14.95 | 10.23 | 1.44E-01 | 0.42    | 13.43  | 9.75E-01 | -7.85  | 5.03  | 1.19E-01 | -20.62 | 14.13 | 1.45E-01 |
| cg01807131 | -12.17 | 5.37  | 2.33E-02 | -17.00 | 8.27  | 3.98E-02 | -13.02  | 12.18  | 2.85E-01 | -0.68  | 12.94 | 9.58E-01 | -11.12 | 11.64 | 3.39E-01 |
| cg14592491 | 30.95  | 13.65 | 2.33E-02 | 21.99  | 25.87 | 3.95E-01 | -138.95 | 158.70 | 3.81E-01 | 39.54  | 17.01 | 2.01E-02 | 5.86   | 51.32 | 9.09E-01 |
| cg05236705 | -14.48 | 6.39  | 2.33E-02 | -24.01 | 11.15 | 3.13E-02 | -6.91   | 26.65  | 7.95E-01 | -5.76  | 9.54  | 5.46E-01 | -21.78 | 15.63 | 1.63E-01 |
| cg19899882 | 31.16  | 13.74 | 2.33E-02 | 41.09  | 21.74 | 5.88E-02 | -0.40   | 42.99  | 9.92E-01 | 28.34  | 27.62 | 3.05E-01 | 30.99  | 27.41 | 2.58E-01 |
| cg06499778 | -11.46 | 5.05  | 2.33E-02 | -18.60 | 8.06  | 2.10E-02 | -6.98   | 11.74  | 5.52E-01 | 0.62   | 11.42 | 9.56E-01 | -13.17 | 10.63 | 2.15E-01 |
| cg03978514 | 15.31  | 6.75  | 2.33E-02 | 13.79  | 9.74  | 1.57E-01 | 15.87   | 12.69  | 2.11E-01 | 7.37   | 21.18 | 7.28E-01 | 25.47  | 18.34 | 1.65E-01 |
| cg24950817 | 23.21  | 10.24 | 2.33E-02 | 9.34   | 17.81 | 6.00E-01 | 24.66   | 20.16  | 2.21E-01 | 28.72  | 19.56 | 1.42E-01 | 42.79  | 27.55 | 1.20E-01 |
| cg26663590 | 6.74   | 2.97  | 2.33E-02 | 4.90   | 3.85  | 2.03E-01 | 10.64   | 6.64   | 1.09E-01 | 12.30  | 8.87  | 1.65E-01 | 3.34   | 9.95  | 7.37E-01 |
| cg13424393 | 4.79   | 2.11  | 2.34E-02 | 4.01   | 3.07  | 1.92E-01 | 7.94    | 4.89   | 1.04E-01 | 5.43   | 4.18  | 1.94E-01 | 0.31   | 7.21  | 9.66E-01 |
| cg13206920 | 19.95  | 8.80  | 2.34E-02 | -9.35  | 23.23 | 6.87E-01 | 61.35   | 54.00  | 2.56E-01 | 18.68  | 11.86 | 1.15E-01 | 33.58  | 16.65 | 4.38E-02 |
| cg16542392 | -25.81 | 11.38 | 2.34E-02 | 21.10  | 32.61 | 5.18E-01 | -57.84  | 147.87 | 6.96E-01 | -34.31 | 12.74 | 7.10E-03 | -9.02  | 41.59 | 8.28E-01 |
| cg20780180 | -7.76  | 3.42  | 2.34E-02 | -9.21  | 6.68  | 1.68E-01 | -5.29   | 11.41  | 6.43E-01 | -5.94  | 4.82  | 2.18E-01 | -13.15 | 9.08  | 1.48E-01 |
| cg04476286 | 19.28  | 8.50  | 2.34E-02 | 36.63  | 17.10 | 3.22E-02 | 10.99   | 45.35  | 8.08E-01 | 17.78  | 10.94 | 1.04E-01 | -7.90  | 25.21 | 7.54E-01 |
| cg25678532 | 35.42  | 15.62 | 2.34E-02 | 34.34  | 33.35 | 3.03E-01 | 49.86   | 99.72  | 6.17E-01 | 36.86  | 19.46 | 5.82E-02 | 26.06  | 46.68 | 5.77E-01 |
| cg20340866 | 14.98  | 6.61  | 2.34E-02 | 9.52   | 15.99 | 5.52E-01 | -6.47   | 19.94  | 7.45E-01 | 20.78  | 9.24  | 2.45E-02 | 16.54  | 14.50 | 2.54E-01 |
| cg08644276 | -6.57  | 2.90  | 2.34E-02 | -9.29  | 5.65  | 1.00E-01 | -6.57   | 9.13   | 4.72E-01 | -5.82  | 4.06  | 1.52E-01 | -3.95  | 8.14  | 6.28E-01 |

|            |        |       |          |         |       |          |         |        |          |        |       |          |        |       |          |
|------------|--------|-------|----------|---------|-------|----------|---------|--------|----------|--------|-------|----------|--------|-------|----------|
| cg08696316 | -24.43 | 10.77 | 2.34E-02 | -28.74  | 16.54 | 8.23E-02 | 1.26    | 31.41  | 9.68E-01 | -55.68 | 29.50 | 5.91E-02 | -15.26 | 18.91 | 4.20E-01 |
| cg14911393 | -9.01  | 3.97  | 2.34E-02 | -13.28  | 10.53 | 2.07E-01 | -27.13  | 20.66  | 1.89E-01 | -6.45  | 4.66  | 1.66E-01 | -15.27 | 13.03 | 2.41E-01 |
| cg26216433 | 8.29   | 3.66  | 2.34E-02 | 12.42   | 5.50  | 2.39E-02 | 5.30    | 9.09   | 5.60E-01 | 12.65  | 8.47  | 1.35E-01 | -1.99  | 7.98  | 8.03E-01 |
| cg23004758 | 13.86  | 6.11  | 2.34E-02 | 19.03   | 9.69  | 4.95E-02 | 10.12   | 14.63  | 4.89E-01 | 17.02  | 21.63 | 4.31E-01 | 9.09   | 10.37 | 3.81E-01 |
| cg02881374 | -15.91 | 7.02  | 2.34E-02 | -7.92   | 19.02 | 6.77E-01 | -29.15  | 27.48  | 2.89E-01 | -16.31 | 8.18  | 4.63E-02 | -14.76 | 27.79 | 5.95E-01 |
| cg07382347 | 2.96   | 1.31  | 2.34E-02 | 2.08    | 1.88  | 2.69E-01 | 5.25    | 2.63   | 4.55E-02 | 1.46   | 4.32  | 7.34E-01 | 2.95   | 3.10  | 3.41E-01 |
| cg06647382 | -27.92 | 12.32 | 2.34E-02 | -5.28   | 23.29 | 8.21E-01 | -16.80  | 55.22  | 7.61E-01 | -46.28 | 15.26 | 2.43E-03 | 0.78   | 33.31 | 9.81E-01 |
| cg20543426 | -9.80  | 4.32  | 2.34E-02 | -17.70  | 6.25  | 4.64E-03 | -4.75   | 11.28  | 6.74E-01 | -0.16  | 11.09 | 9.89E-01 | -3.66  | 8.75  | 6.76E-01 |
| cg07939503 | 23.42  | 10.33 | 2.34E-02 | 10.23   | 18.99 | 5.90E-01 | 31.79   | 21.50  | 1.39E-01 | 15.70  | 8.62  | 6.84E-02 | 77.81  | 31.08 | 1.23E-02 |
| cg01966117 | 11.93  | 5.26  | 2.34E-02 | 14.79   | 7.65  | 5.33E-02 | 24.42   | 11.76  | 3.79E-02 | -2.06  | 14.82 | 8.90E-01 | 1.53   | 11.73 | 8.96E-01 |
| cg17505469 | -7.56  | 3.34  | 2.34E-02 | -6.82   | 4.85  | 1.59E-01 | -8.37   | 7.55   | 2.68E-01 | 3.01   | 9.99  | 7.63E-01 | -13.80 | 7.12  | 5.26E-02 |
| cg01153737 | 21.10  | 9.31  | 2.34E-02 | 21.10   | 17.93 | 2.39E-01 | 15.97   | 16.87  | 3.44E-01 | 19.55  | 20.80 | 3.47E-01 | 29.40  | 19.60 | 1.34E-01 |
| cg01394324 | 21.45  | 9.46  | 2.34E-02 | 49.15   | 17.50 | 4.98E-03 | 12.01   | 17.63  | 4.96E-01 | 9.40   | 15.21 | 5.36E-01 | 17.02  | 21.33 | 4.25E-01 |
| cg26935168 | 13.48  | 5.95  | 2.34E-02 | 7.05    | 8.87  | 4.27E-01 | 18.08   | 13.37  | 1.76E-01 | 4.66   | 18.42 | 8.00E-01 | 25.17  | 11.93 | 3.50E-02 |
| cg03715931 | 30.47  | 13.44 | 2.34E-02 | 49.60   | 25.78 | 5.44E-02 | 0.37    | 67.48  | 9.96E-01 | 31.77  | 18.61 | 8.79E-02 | 2.40   | 32.90 | 9.42E-01 |
| cg08310224 | 19.73  | 8.70  | 2.34E-02 | 9.88    | 16.75 | 5.55E-01 | 16.18   | 18.37  | 3.78E-01 | 36.65  | 13.75 | 7.69E-03 | -7.00  | 24.98 | 7.79E-01 |
| cg10416622 | -31.89 | 14.07 | 2.34E-02 | -44.39  | 28.59 | 1.21E-01 | -182.29 | 128.23 | 1.55E-01 | -27.38 | 17.97 | 1.28E-01 | -16.29 | 38.57 | 6.73E-01 |
| cg07081477 | 11.04  | 4.87  | 2.34E-02 | 12.28   | 6.25  | 4.95E-02 | 8.75    | 17.47  | 6.16E-01 | 4.25   | 17.50 | 8.08E-01 | 10.84  | 10.01 | 2.78E-01 |
| cg02708922 | 45.07  | 19.89 | 2.34E-02 | 51.40   | 32.76 | 1.17E-01 | 32.14   | 52.01  | 5.37E-01 | 30.17  | 38.43 | 4.32E-01 | 61.40  | 42.64 | 1.50E-01 |
| cg12054341 | 14.76  | 6.51  | 2.34E-02 | 18.94   | 20.41 | 3.54E-01 | 58.64   | 37.78  | 1.21E-01 | 10.36  | 7.64  | 1.75E-01 | 25.25  | 17.36 | 1.46E-01 |
| cg02774129 | -8.00  | 3.53  | 2.34E-02 | -8.89   | 5.29  | 9.32E-02 | -12.86  | 7.53   | 8.77E-02 | -3.99  | 9.48  | 6.74E-01 | -3.40  | 7.95  | 6.69E-01 |
| cg16579555 | 50.34  | 22.21 | 2.34E-02 | 52.73   | 62.29 | 3.97E-01 | -3.02   | 220.53 | 9.89E-01 | 63.53  | 25.94 | 1.43E-02 | -22.67 | 61.79 | 7.14E-01 |
| cg19643545 | -10.55 | 4.66  | 2.34E-02 | -7.16   | 9.11  | 4.32E-01 | -10.52  | 12.79  | 4.11E-01 | -9.55  | 6.89  | 1.66E-01 | -19.58 | 12.04 | 1.04E-01 |
| cg07147573 | 20.45  | 9.02  | 2.34E-02 | -2.79   | 24.54 | 9.09E-01 | 24.77   | 37.08  | 5.04E-01 | 20.62  | 10.64 | 5.25E-02 | 52.57  | 30.79 | 8.77E-02 |
| cg24145007 | 16.11  | 7.11  | 2.34E-02 | 14.34   | 20.38 | 4.82E-01 | 35.31   | 32.61  | 2.79E-01 | 15.31  | 8.16  | 6.07E-02 | 14.80  | 26.36 | 5.75E-01 |
| cg21279353 | 10.89  | 4.81  | 2.34E-02 | 8.41    | 13.17 | 5.23E-01 | -8.58   | 23.61  | 7.16E-01 | 10.29  | 5.50  | 6.13E-02 | 36.91  | 19.40 | 5.71E-02 |
| cg02470736 | -60.66 | 26.77 | 2.34E-02 | -112.35 | 65.65 | 8.70E-02 | -9.59   | 319.33 | 9.76E-01 | -68.84 | 33.91 | 4.24E-02 | 4.78   | 59.30 | 9.36E-01 |
| cg03759556 | -19.60 | 8.65  | 2.34E-02 | -12.73  | 20.45 | 5.34E-01 | -31.74  | 30.94  | 3.05E-01 | -18.31 | 10.78 | 8.94E-02 | -30.84 | 27.49 | 2.62E-01 |
| cg16247184 | -8.89  | 3.92  | 2.35E-02 | -11.65  | 7.56  | 1.23E-01 | -10.05  | 8.95   | 2.62E-01 | -4.90  | 6.31  | 4.37E-01 | -12.67 | 10.07 | 2.08E-01 |
| cg00148862 | 7.42   | 3.27  | 2.35E-02 | 4.94    | 4.93  | 3.16E-01 | 7.38    | 6.56   | 2.61E-01 | 21.62  | 11.30 | 5.58E-02 | 7.03   | 6.89  | 3.08E-01 |
| cg05719902 | 7.12   | 3.14  | 2.35E-02 | 3.71    | 4.47  | 4.06E-01 | 5.55    | 8.60   | 5.19E-01 | 5.94   | 8.73  | 4.96E-01 | 15.47  | 6.36  | 1.49E-02 |
| cg05328761 | -13.25 | 5.85  | 2.35E-02 | -24.94  | 14.75 | 9.08E-02 | -21.97  | 28.56  | 4.42E-01 | -9.01  | 6.88  | 1.90E-01 | -24.20 | 20.88 | 2.46E-01 |
| cg26804057 | -19.23 | 8.49  | 2.35E-02 | -17.81  | 22.68 | 4.32E-01 | -30.44  | 42.37  | 4.72E-01 | -24.06 | 9.84  | 1.45E-02 | 30.99  | 30.69 | 3.13E-01 |
| cg04077662 | 21.11  | 9.32  | 2.35E-02 | 10.76   | 25.82 | 6.77E-01 | -17.58  | 60.49  | 7.71E-01 | 30.93  | 11.20 | 5.75E-03 | -8.30  | 23.75 | 7.27E-01 |
| cg12501220 | 11.40  | 5.03  | 2.35E-02 | 8.07    | 8.20  | 3.25E-01 | 20.79   | 9.56   | 2.97E-02 | 8.67   | 14.26 | 5.43E-01 | 6.86   | 10.66 | 5.20E-01 |

|            |        |       |          |        |       |          |         |        |          |        |       |          |        |       |          |
|------------|--------|-------|----------|--------|-------|----------|---------|--------|----------|--------|-------|----------|--------|-------|----------|
| cg26944301 | 32.92  | 14.53 | 2.35E-02 | 19.11  | 18.37 | 2.98E-01 | 13.34   | 49.13  | 7.86E-01 | 55.05  | 43.17 | 2.02E-01 | 77.98  | 34.83 | 2.52E-02 |
| cg04813787 | -8.76  | 3.86  | 2.35E-02 | -9.15  | 5.69  | 1.08E-01 | -8.87   | 9.55   | 3.53E-01 | -8.14  | 9.86  | 4.09E-01 | -8.28  | 8.20  | 3.13E-01 |
| cg05249836 | 5.48   | 2.42  | 2.35E-02 | 5.29   | 3.19  | 9.72E-02 | 9.50    | 5.09   | 6.17E-02 | 6.52   | 8.00  | 4.15E-01 | -2.76  | 7.31  | 7.06E-01 |
| cg09730170 | -12.00 | 5.29  | 2.35E-02 | -8.15  | 11.18 | 4.66E-01 | -10.59  | 14.76  | 4.73E-01 | -14.47 | 7.35  | 4.89E-02 | -10.10 | 14.79 | 4.94E-01 |
| cg10193091 | -16.87 | 7.45  | 2.35E-02 | -38.52 | 18.32 | 3.55E-02 | -8.81   | 35.17  | 8.02E-01 | -12.38 | 8.83  | 1.61E-01 | -16.60 | 26.55 | 5.32E-01 |
| cg26014036 | 15.27  | 6.74  | 2.35E-02 | 19.71  | 7.86  | 1.22E-02 | 3.05    | 13.73  | 8.24E-01 | 53.39  | 25.09 | 3.34E-02 | 8.24   | 10.46 | 4.31E-01 |
| cg09022808 | -13.17 | 5.81  | 2.35E-02 | -16.50 | 10.05 | 1.01E-01 | -6.69   | 12.95  | 6.05E-01 | -14.71 | 11.65 | 2.07E-01 | -12.27 | 12.53 | 3.27E-01 |
| cg20151401 | -3.76  | 1.66  | 2.35E-02 | -3.54  | 2.27  | 1.19E-01 | -1.06   | 3.73   | 7.76E-01 | -7.37  | 7.05  | 2.96E-01 | -5.88  | 3.60  | 1.02E-01 |
| cg16547579 | 8.69   | 3.83  | 2.35E-02 | 11.21  | 5.50  | 4.14E-02 | 10.92   | 10.69  | 3.07E-01 | 9.83   | 13.35 | 4.62E-01 | 3.36   | 6.98  | 6.30E-01 |
| cg19980199 | 16.86  | 7.44  | 2.35E-02 | 30.16  | 12.80 | 1.85E-02 | 10.12   | 15.31  | 5.08E-01 | 10.98  | 14.03 | 4.34E-01 | 8.21   | 19.61 | 6.75E-01 |
| cg07853992 | 23.38  | 10.32 | 2.35E-02 | 57.29  | 21.37 | 7.33E-03 | -4.49   | 91.98  | 9.61E-01 | 15.95  | 8.78  | 6.94E-02 | 9.52   | 33.11 | 7.74E-01 |
| cg21751058 | 27.76  | 12.25 | 2.35E-02 | 22.34  | 14.65 | 1.27E-01 | -10.00  | 50.20  | 8.42E-01 | 16.42  | 70.48 | 8.16E-01 | 57.97  | 26.67 | 2.97E-02 |
| cg12255995 | -42.60 | 18.80 | 2.35E-02 | -39.51 | 23.85 | 9.76E-02 | -117.67 | 57.36  | 4.02E-02 | -0.63  | 65.76 | 9.92E-01 | -28.23 | 43.23 | 5.14E-01 |
| cg17499345 | -16.79 | 7.41  | 2.35E-02 | -8.52  | 16.64 | 6.09E-01 | 0.84    | 16.14  | 9.58E-01 | -27.31 | 10.60 | 1.00E-02 | -18.96 | 23.22 | 4.14E-01 |
| cg20537886 | -10.68 | 4.71  | 2.35E-02 | -10.10 | 7.10  | 1.55E-01 | -9.90   | 10.24  | 3.33E-01 | -11.25 | 12.03 | 3.50E-01 | -12.38 | 10.70 | 2.47E-01 |
| cg13709244 | 38.58  | 17.03 | 2.35E-02 | 94.15  | 43.75 | 3.14E-02 | -73.54  | 179.05 | 6.81E-01 | 36.13  | 16.80 | 3.15E-02 | -22.67 | 57.98 | 6.96E-01 |
| cg00096307 | -11.99 | 5.30  | 2.35E-02 | -12.55 | 13.36 | 3.47E-01 | -3.71   | 29.02  | 8.98E-01 | -10.29 | 6.26  | 1.00E-01 | -26.94 | 17.25 | 1.18E-01 |
| cg12633154 | 2.86   | 1.26  | 2.35E-02 | 1.65   | 1.76  | 3.50E-01 | 4.05    | 2.49   | 1.04E-01 | 5.18   | 4.38  | 2.37E-01 | 3.74   | 3.31  | 2.59E-01 |
| cg01291544 | 37.93  | 16.75 | 2.35E-02 | 38.50  | 25.03 | 1.24E-01 | 77.09   | 36.14  | 3.29E-02 | 34.48  | 38.03 | 3.65E-01 | -17.80 | 44.23 | 6.87E-01 |
| cg17694130 | -6.25  | 2.76  | 2.35E-02 | -5.06  | 3.93  | 1.98E-01 | -5.03   | 7.25   | 4.87E-01 | -10.04 | 7.73  | 1.94E-01 | -7.45  | 5.70  | 1.92E-01 |
| cg04421891 | -11.98 | 5.29  | 2.35E-02 | -23.54 | 11.20 | 3.55E-02 | -8.68   | 18.96  | 6.47E-01 | -7.72  | 6.88  | 2.62E-01 | -13.84 | 16.12 | 3.91E-01 |
| cg04927066 | -11.63 | 5.14  | 2.35E-02 | -4.12  | 13.52 | 7.61E-01 | -19.68  | 17.82  | 2.69E-01 | -12.27 | 6.14  | 4.57E-02 | -11.22 | 19.00 | 5.55E-01 |
| cg16587725 | -5.88  | 2.60  | 2.35E-02 | -2.66  | 4.55  | 5.59E-01 | -9.13   | 6.21   | 1.42E-01 | -9.63  | 4.63  | 3.76E-02 | -2.11  | 6.04  | 7.27E-01 |
| cg21821214 | 18.60  | 8.21  | 2.35E-02 | 23.99  | 12.92 | 6.32E-02 | -3.26   | 21.43  | 8.79E-01 | 21.95  | 19.45 | 2.59E-01 | 20.19  | 15.78 | 2.01E-01 |
| cg02232377 | -7.02  | 3.10  | 2.35E-02 | -7.93  | 5.68  | 1.63E-01 | -8.69   | 7.37   | 2.38E-01 | -10.07 | 5.21  | 5.31E-02 | 2.68   | 7.52  | 7.22E-01 |
| cg08244301 | 7.39   | 3.26  | 2.35E-02 | 8.56   | 4.12  | 3.79E-02 | 10.87   | 8.06   | 1.78E-01 | 4.62   | 12.00 | 7.00E-01 | -0.67  | 8.83  | 9.39E-01 |
| cg20950646 | 14.45  | 6.38  | 2.35E-02 | 19.77  | 8.99  | 2.78E-02 | -3.78   | 15.03  | 8.01E-01 | 16.14  | 18.62 | 3.86E-01 | 16.45  | 14.31 | 2.50E-01 |
| cg15381609 | -16.68 | 7.36  | 2.35E-02 | -24.80 | 21.35 | 2.45E-01 | -44.46  | 28.56  | 1.20E-01 | -13.92 | 8.48  | 1.01E-01 | -4.46  | 30.05 | 8.82E-01 |
| cg08085853 | -12.21 | 5.39  | 2.35E-02 | -27.11 | 12.87 | 3.52E-02 | -11.90  | 25.81  | 6.45E-01 | -7.82  | 6.46  | 2.27E-01 | -17.48 | 18.40 | 3.42E-01 |
| cg02743674 | -12.77 | 5.64  | 2.35E-02 | -12.30 | 7.72  | 1.11E-01 | -13.15  | 12.79  | 3.04E-01 | -4.01  | 17.86 | 8.22E-01 | -18.86 | 13.58 | 1.65E-01 |
| cg01907688 | 26.15  | 11.55 | 2.35E-02 | 47.18  | 31.09 | 1.29E-01 | 131.24  | 151.22 | 3.85E-01 | 23.17  | 13.15 | 7.81E-02 | 11.88  | 39.49 | 7.64E-01 |
| cg19522185 | -17.36 | 7.67  | 2.35E-02 | -5.00  | 18.62 | 7.88E-01 | -5.92   | 42.15  | 8.88E-01 | -21.69 | 9.06  | 1.67E-02 | -9.65  | 26.93 | 7.20E-01 |
| cg21744723 | 49.45  | 21.84 | 2.36E-02 | -37.93 | 56.85 | 5.05E-01 | 35.65   | 218.23 | 8.70E-01 | 68.23  | 23.27 | 3.37E-03 | 30.93  | 74.12 | 6.76E-01 |
| cg26530275 | -10.56 | 4.66  | 2.36E-02 | -5.69  | 11.69 | 6.26E-01 | -38.74  | 23.85  | 1.04E-01 | -11.33 | 5.55  | 4.14E-02 | -1.89  | 14.91 | 8.99E-01 |
| cg12102573 | 23.24  | 10.26 | 2.36E-02 | 12.59  | 22.21 | 5.71E-01 | 42.62   | 19.88  | 3.21E-02 | 6.42   | 16.94 | 7.05E-01 | 44.74  | 26.25 | 8.83E-02 |

|            |        |       |          |        |       |          |         |        |          |        |       |          |        |       |          |
|------------|--------|-------|----------|--------|-------|----------|---------|--------|----------|--------|-------|----------|--------|-------|----------|
| cg05805736 | -43.42 | 19.18 | 2.36E-02 | -37.93 | 23.23 | 1.03E-01 | -158.81 | 95.12  | 9.50E-02 | -48.21 | 70.68 | 4.95E-01 | -37.08 | 42.45 | 3.82E-01 |
| cg04136490 | -11.65 | 5.14  | 2.36E-02 | -23.20 | 10.95 | 3.41E-02 | -22.08  | 15.15  | 1.45E-01 | -4.75  | 7.26  | 5.13E-01 | -9.84  | 12.78 | 4.41E-01 |
| cg09447217 | -16.01 | 7.07  | 2.36E-02 | 2.06   | 15.48 | 8.94E-01 | -3.65   | 32.11  | 9.10E-01 | -20.93 | 8.96  | 1.95E-02 | -26.92 | 20.42 | 1.87E-01 |
| cg09455182 | -53.96 | 23.83 | 2.36E-02 | -37.47 | 46.87 | 4.24E-01 | 4.13    | 231.96 | 9.86E-01 | -79.26 | 31.05 | 1.07E-02 | 16.76  | 63.31 | 7.91E-01 |
| cg12171761 | -8.72  | 3.85  | 2.36E-02 | -8.16  | 5.18  | 1.15E-01 | -4.75   | 10.14  | 6.40E-01 | -4.95  | 9.68  | 6.09E-01 | -18.90 | 10.11 | 6.16E-02 |
| cg23058177 | 29.11  | 12.86 | 2.36E-02 | 8.06   | 32.19 | 8.02E-01 | -8.39   | 100.88 | 9.34E-01 | 36.87  | 16.98 | 2.99E-02 | 27.19  | 25.68 | 2.90E-01 |
| cg14041283 | 23.07  | 10.19 | 2.36E-02 | 36.39  | 18.08 | 4.41E-02 | 17.03   | 31.27  | 5.86E-01 | 10.11  | 15.92 | 5.25E-01 | 33.42  | 24.99 | 1.81E-01 |
| cg04272632 | 22.85  | 10.10 | 2.36E-02 | 44.78  | 22.38 | 4.54E-02 | 15.23   | 45.86  | 7.40E-01 | 16.90  | 12.96 | 1.92E-01 | 19.47  | 26.89 | 4.69E-01 |
| cg25272065 | 30.33  | 13.40 | 2.36E-02 | 22.71  | 16.52 | 1.69E-01 | 29.36   | 83.96  | 7.27E-01 | 80.95  | 46.19 | 7.97E-02 | 33.69  | 27.77 | 2.25E-01 |
| cg09322984 | 47.15  | 20.83 | 2.36E-02 | 14.21  | 19.99 | 4.77E-01 | 50.66   | 49.44  | 3.05E-01 | 93.00  | 45.64 | 4.16E-02 | 81.55  | 38.73 | 3.52E-02 |
| cg10142436 | 9.16   | 4.05  | 2.36E-02 | 8.98   | 5.78  | 1.20E-01 | 14.64   | 9.24   | 1.13E-01 | 16.80  | 12.10 | 1.65E-01 | 0.37   | 8.89  | 9.66E-01 |
| cg20255713 | -11.54 | 5.10  | 2.36E-02 | -33.11 | 14.66 | 2.39E-02 | -20.69  | 19.99  | 3.00E-01 | -7.28  | 6.07  | 2.30E-01 | -9.74  | 15.51 | 5.30E-01 |
| cg06557630 | 15.06  | 6.65  | 2.36E-02 | 7.56   | 12.54 | 5.47E-01 | 28.36   | 43.90  | 5.18E-01 | 14.69  | 9.45  | 1.20E-01 | 25.04  | 14.89 | 9.27E-02 |
| cg01678172 | -22.70 | 10.03 | 2.36E-02 | -24.13 | 27.01 | 3.72E-01 | -28.76  | 77.78  | 7.12E-01 | -19.74 | 11.57 | 8.79E-02 | -43.03 | 32.64 | 1.87E-01 |
| cg16256414 | 17.51  | 7.74  | 2.36E-02 | 24.55  | 10.60 | 2.05E-02 | -4.36   | 23.10  | 8.50E-01 | 41.11  | 33.56 | 2.21E-01 | 9.04   | 14.09 | 5.21E-01 |
| cg25600256 | -5.89  | 2.60  | 2.36E-02 | -6.70  | 5.05  | 1.84E-01 | -11.23  | 6.51   | 8.44E-02 | -4.35  | 3.99  | 2.76E-01 | -3.12  | 6.73  | 6.43E-01 |
| cg22955628 | 36.09  | 15.94 | 2.36E-02 | -28.70 | 50.97 | 5.73E-01 | 49.44   | 215.39 | 8.18E-01 | 39.97  | 17.43 | 2.19E-02 | 86.04  | 64.87 | 1.85E-01 |
| cg17817564 | -31.60 | 13.96 | 2.36E-02 | -47.93 | 19.30 | 1.30E-02 | 13.67   | 41.05  | 7.39E-01 | -34.44 | 36.31 | 3.43E-01 | -14.15 | 30.20 | 6.39E-01 |
| cg20937028 | -13.96 | 6.17  | 2.36E-02 | 1.22   | 12.44 | 9.22E-01 | -20.64  | 15.51  | 1.83E-01 | -13.71 | 8.50  | 1.07E-01 | -34.22 | 16.80 | 4.16E-02 |
| cg25203980 | 12.99  | 5.74  | 2.36E-02 | 11.95  | 14.67 | 4.15E-01 | -0.48   | 14.81  | 9.74E-01 | 18.55  | 7.25  | 1.05E-02 | -5.62  | 21.73 | 7.96E-01 |
| cg09279736 | 3.45   | 1.52  | 2.36E-02 | 2.36   | 2.08  | 2.58E-01 | 6.44    | 3.09   | 3.69E-02 | 2.70   | 4.97  | 5.86E-01 | 2.87   | 4.27  | 5.02E-01 |
| cg11181171 | 22.79  | 10.07 | 2.36E-02 | 21.74  | 15.25 | 1.54E-01 | 37.83   | 29.69  | 2.03E-01 | 43.12  | 23.44 | 6.58E-02 | 3.81   | 19.57 | 8.46E-01 |
| cg22632987 | 21.50  | 9.50  | 2.36E-02 | 27.71  | 19.48 | 1.55E-01 | 6.88    | 17.54  | 6.95E-01 | 14.73  | 16.75 | 3.79E-01 | 55.46  | 24.77 | 2.52E-02 |
| cg09888562 | 24.37  | 10.77 | 2.36E-02 | -5.97  | 31.07 | 8.48E-01 | -5.08   | 112.21 | 9.64E-01 | 27.71  | 12.32 | 2.45E-02 | 37.21  | 33.03 | 2.60E-01 |
| cg00567703 | 7.78   | 3.44  | 2.36E-02 | 7.87   | 4.61  | 8.80E-02 | 5.55    | 7.24   | 4.43E-01 | 13.15  | 12.31 | 2.86E-01 | 7.99   | 9.12  | 3.81E-01 |
| cg11234098 | 17.31  | 7.65  | 2.36E-02 | -13.31 | 23.14 | 5.65E-01 | 15.99   | 28.10  | 5.69E-01 | 19.22  | 8.83  | 2.95E-02 | 47.29  | 29.55 | 1.10E-01 |
| cg20655792 | 8.69   | 3.84  | 2.36E-02 | 6.91   | 5.55  | 2.13E-01 | 17.86   | 7.41   | 1.59E-02 | 0.21   | 15.56 | 9.89E-01 | 2.95   | 8.79  | 7.37E-01 |
| cg22856434 | -29.45 | 13.01 | 2.36E-02 | 0.18   | 31.21 | 9.95E-01 | -25.22  | 55.87  | 6.52E-01 | -36.85 | 17.09 | 3.11E-02 | -35.14 | 29.67 | 2.36E-01 |
| cg11853320 | 15.06  | 6.65  | 2.36E-02 | 2.79   | 8.24  | 7.35E-01 | 24.60   | 13.31  | 6.45E-02 | 38.31  | 20.16 | 5.74E-02 | 16.97  | 9.74  | 8.15E-02 |
| cg26254193 | 17.85  | 7.89  | 2.36E-02 | 14.69  | 20.68 | 4.78E-01 | 9.81    | 32.72  | 7.64E-01 | 19.19  | 9.35  | 4.01E-02 | 17.55  | 27.17 | 5.18E-01 |
| cg03284554 | 9.06   | 4.00  | 2.36E-02 | 12.28  | 6.20  | 4.76E-02 | 6.18    | 8.75   | 4.80E-01 | 16.09  | 9.49  | 9.02E-02 | -1.11  | 9.05  | 9.02E-01 |
| cg06508445 | -21.57 | 9.53  | 2.37E-02 | -35.13 | 15.19 | 2.08E-02 | 6.65    | 22.62  | 7.69E-01 | -28.98 | 20.68 | 1.61E-01 | -12.79 | 20.48 | 5.32E-01 |
| cg11692403 | -22.20 | 9.81  | 2.37E-02 | -25.65 | 19.61 | 1.91E-01 | -21.14  | 42.71  | 6.21E-01 | -21.13 | 13.65 | 1.21E-01 | -20.79 | 23.15 | 3.69E-01 |
| cg19926144 | -11.03 | 4.88  | 2.37E-02 | -30.10 | 14.07 | 3.24E-02 | -15.14  | 23.94  | 5.27E-01 | -7.72  | 5.65  | 1.72E-01 | -11.05 | 15.88 | 4.86E-01 |
| cg13247581 | 47.02  | 20.78 | 2.37E-02 | 82.13  | 62.03 | 1.86E-01 | -29.78  | 228.05 | 8.96E-01 | 45.44  | 23.44 | 5.26E-02 | 24.99  | 68.05 | 7.13E-01 |

|            |        |       |          |        |       |          |         |        |          |        |       |          |        |       |          |
|------------|--------|-------|----------|--------|-------|----------|---------|--------|----------|--------|-------|----------|--------|-------|----------|
| cg24060473 | 56.30  | 24.88 | 2.37E-02 | 38.24  | 52.09 | 4.63E-01 | -160.94 | 277.16 | 5.61E-01 | 41.04  | 30.68 | 1.81E-01 | 141.88 | 58.93 | 1.61E-02 |
| cg01688026 | 31.82  | 14.06 | 2.37E-02 | 27.88  | 28.29 | 3.24E-01 | 5.28    | 103.37 | 9.59E-01 | 29.96  | 17.99 | 9.57E-02 | 52.95  | 40.11 | 1.87E-01 |
| cg24269846 | -44.35 | 19.60 | 2.37E-02 | -56.29 | 24.28 | 2.04E-02 | -1.06   | 88.51  | 9.90E-01 | 45.87  | 65.31 | 4.83E-01 | -56.19 | 42.88 | 1.90E-01 |
| cg10185552 | 38.93  | 17.21 | 2.37E-02 | 70.81  | 49.81 | 1.55E-01 | 87.60   | 215.35 | 6.84E-01 | 36.56  | 19.40 | 5.94E-02 | 13.11  | 58.25 | 8.22E-01 |
| cg26643870 | 10.53  | 4.65  | 2.37E-02 | 10.31  | 6.36  | 1.05E-01 | 23.32   | 8.66   | 7.08E-03 | 2.64   | 9.35  | 7.78E-01 | 1.03   | 11.79 | 9.30E-01 |
| cg03310376 | -32.44 | 14.34 | 2.37E-02 | -22.52 | 17.19 | 1.90E-01 | -78.80  | 70.07  | 2.61E-01 | -74.51 | 65.22 | 2.53E-01 | -46.12 | 31.01 | 1.37E-01 |
| cg16794390 | 19.25  | 8.51  | 2.37E-02 | 26.30  | 17.16 | 1.25E-01 | 29.54   | 15.75  | 6.07E-02 | 12.26  | 15.17 | 4.19E-01 | 2.08   | 22.12 | 9.25E-01 |
| cg18099408 | -69.77 | 30.84 | 2.37E-02 | -99.66 | 42.09 | 1.79E-02 | 122.45  | 191.12 | 5.22E-01 | -97.55 | 78.09 | 2.12E-01 | -15.04 | 58.18 | 7.96E-01 |
| cg11308747 | 42.06  | 18.59 | 2.37E-02 | -14.76 | 46.87 | 7.53E-01 | -60.64  | 248.13 | 8.07E-01 | 59.62  | 20.04 | 2.93E-03 | -12.41 | 67.31 | 8.54E-01 |
| cg00068153 | 14.57  | 6.44  | 2.37E-02 | 19.11  | 17.85 | 2.84E-01 | 2.55    | 20.87  | 9.03E-01 | 14.87  | 7.71  | 5.38E-02 | 18.95  | 23.15 | 4.13E-01 |
| cg06850241 | -8.57  | 3.79  | 2.37E-02 | -9.52  | 6.10  | 1.18E-01 | -1.64   | 8.93   | 8.54E-01 | -6.50  | 7.55  | 3.90E-01 | -16.22 | 8.86  | 6.73E-02 |
| cg06869641 | -11.42 | 5.05  | 2.37E-02 | -11.26 | 7.24  | 1.20E-01 | -13.87  | 12.51  | 2.68E-01 | -12.72 | 13.00 | 3.28E-01 | -8.86  | 11.30 | 4.33E-01 |
| cg25417281 | -41.72 | 18.45 | 2.37E-02 | -37.06 | 23.26 | 1.11E-01 | -89.06  | 108.24 | 4.11E-01 | -21.72 | 69.95 | 7.56E-01 | -52.52 | 35.31 | 1.37E-01 |
| cg27394127 | 13.15  | 5.82  | 2.37E-02 | 4.62   | 8.64  | 5.93E-01 | 19.74   | 10.35  | 5.64E-02 | 5.03   | 22.26 | 8.21E-01 | 27.56  | 14.42 | 5.60E-02 |
| cg26753302 | 7.54   | 3.33  | 2.37E-02 | 11.18  | 6.00  | 6.25E-02 | 10.46   | 5.11   | 4.07E-02 | -3.63  | 9.46  | 7.01E-01 | 0.66   | 8.83  | 9.40E-01 |
| cg14329680 | -11.41 | 5.05  | 2.37E-02 | -16.46 | 7.76  | 3.39E-02 | -13.87  | 12.52  | 2.68E-01 | -9.90  | 10.66 | 3.53E-01 | 0.08   | 11.55 | 9.94E-01 |
| cg12731925 | 26.38  | 11.66 | 2.37E-02 | 8.49   | 22.41 | 7.05E-01 | -18.67  | 42.70  | 6.62E-01 | 41.13  | 15.84 | 9.39E-03 | 28.16  | 34.79 | 4.18E-01 |
| cg03721528 | 14.65  | 6.48  | 2.37E-02 | 13.59  | 16.21 | 4.02E-01 | 17.67   | 19.36  | 3.62E-01 | 17.71  | 7.93  | 2.55E-02 | -21.39 | 26.16 | 4.13E-01 |
| cg08693600 | 41.86  | 18.51 | 2.37E-02 | 37.45  | 48.53 | 4.40E-01 | -105.67 | 233.50 | 6.51E-01 | 44.63  | 20.99 | 3.35E-02 | 33.60  | 69.41 | 6.28E-01 |
| cg16294668 | 6.90   | 3.05  | 2.37E-02 | 6.91   | 4.10  | 9.21E-02 | 13.33   | 6.28   | 3.38E-02 | -3.04  | 10.86 | 7.80E-01 | 1.30   | 8.39  | 8.77E-01 |
| cg14733637 | -15.01 | 6.64  | 2.37E-02 | -11.35 | 9.80  | 2.47E-01 | -6.86   | 22.34  | 7.59E-01 | -13.06 | 16.95 | 4.41E-01 | -24.05 | 12.14 | 4.75E-02 |
| cg18255550 | -12.43 | 5.50  | 2.37E-02 | -24.93 | 12.29 | 4.26E-02 | -41.66  | 25.09  | 9.68E-02 | -9.14  | 5.50  | 9.62E-02 | -0.85  | 14.71 | 9.54E-01 |
| cg13698224 | -7.97  | 3.53  | 2.37E-02 | -15.21 | 8.03  | 5.83E-02 | -4.26   | 13.39  | 7.50E-01 | -6.80  | 4.49  | 1.30E-01 | -4.60  | 10.08 | 6.48E-01 |
| cg04214075 | 18.46  | 8.16  | 2.37E-02 | 21.46  | 10.45 | 4.00E-02 | -2.45   | 36.86  | 9.47E-01 | 20.80  | 40.84 | 6.10E-01 | 15.47  | 14.90 | 2.99E-01 |
| cg08764162 | 5.58   | 2.47  | 2.37E-02 | 5.31   | 3.14  | 9.10E-02 | 11.57   | 6.78   | 8.80E-02 | 7.70   | 7.65  | 3.14E-01 | -0.19  | 6.44  | 9.77E-01 |
| cg05354180 | -18.03 | 7.97  | 2.37E-02 | -20.17 | 20.66 | 3.29E-01 | -26.00  | 41.14  | 5.27E-01 | -15.05 | 9.18  | 1.01E-01 | -45.64 | 32.79 | 1.64E-01 |
| cg07988979 | -13.26 | 5.87  | 2.37E-02 | -22.22 | 11.09 | 4.50E-02 | -5.28   | 11.60  | 6.49E-01 | -9.32  | 10.96 | 3.95E-01 | -17.02 | 13.92 | 2.21E-01 |
| cg20469680 | 15.57  | 6.89  | 2.37E-02 | 32.51  | 20.32 | 1.10E-01 | -0.83   | 33.18  | 9.80E-01 | 13.37  | 8.03  | 9.60E-02 | 19.08  | 21.00 | 3.64E-01 |
| cg08097817 | -16.74 | 7.40  | 2.37E-02 | -9.96  | 17.11 | 5.60E-01 | -30.22  | 28.34  | 2.86E-01 | -20.91 | 9.46  | 2.71E-02 | -0.02  | 20.39 | 9.99E-01 |
| cg23747996 | 20.32  | 8.99  | 2.37E-02 | 24.21  | 18.41 | 1.88E-01 | 12.04   | 15.48  | 4.37E-01 | 13.44  | 17.34 | 4.38E-01 | 44.13  | 22.76 | 5.25E-02 |
| cg27196768 | 10.42  | 4.61  | 2.37E-02 | 1.85   | 12.98 | 8.87E-01 | -66.04  | 50.91  | 1.95E-01 | 11.81  | 5.17  | 2.23E-02 | 18.66  | 17.12 | 2.76E-01 |
| cg22117188 | -11.66 | 5.16  | 2.37E-02 | -19.14 | 7.91  | 1.56E-02 | -3.81   | 10.71  | 7.22E-01 | -7.54  | 13.14 | 5.66E-01 | -7.85  | 11.85 | 5.08E-01 |
| cg07088882 | -9.68  | 4.28  | 2.38E-02 | -14.11 | 6.08  | 2.03E-02 | -12.08  | 9.97   | 2.25E-01 | -2.57  | 14.93 | 8.64E-01 | -1.05  | 8.78  | 9.04E-01 |
| cg00806490 | 17.69  | 7.82  | 2.38E-02 | 29.67  | 12.29 | 1.57E-02 | 6.96    | 22.97  | 7.62E-01 | 17.71  | 17.31 | 3.06E-01 | 4.49   | 14.95 | 7.64E-01 |
| cg12812583 | 15.32  | 6.78  | 2.38E-02 | 29.04  | 19.43 | 1.35E-01 | 33.06   | 36.12  | 3.60E-01 | 12.60  | 8.15  | 1.22E-01 | 12.63  | 17.43 | 4.69E-01 |



|            |        |       |          |        |       |          |         |        |          |        |       |          |        |       |          |
|------------|--------|-------|----------|--------|-------|----------|---------|--------|----------|--------|-------|----------|--------|-------|----------|
| cg19907483 | -21.41 | 9.47  | 2.38E-02 | -6.37  | 14.97 | 6.70E-01 | -1.66   | 37.96  | 9.65E-01 | -35.93 | 17.23 | 3.70E-02 | -33.55 | 19.51 | 8.55E-02 |
| cg00375608 | 14.63  | 6.47  | 2.38E-02 | 26.70  | 16.47 | 1.05E-01 | 2.35    | 34.55  | 9.46E-01 | 11.88  | 7.51  | 1.14E-01 | 23.62  | 24.84 | 3.42E-01 |
| cg06835425 | -52.41 | 23.18 | 2.38E-02 | -60.19 | 27.22 | 2.70E-02 | -60.37  | 146.07 | 6.79E-01 | -7.16  | 99.41 | 9.43E-01 | -35.10 | 52.48 | 5.04E-01 |
| cg12212706 | 15.06  | 6.66  | 2.38E-02 | 13.89  | 8.72  | 1.11E-01 | 2.02    | 16.16  | 9.00E-01 | 78.00  | 42.52 | 6.66E-02 | 20.60  | 13.57 | 1.29E-01 |
| cg06969527 | 42.87  | 18.96 | 2.38E-02 | 29.07  | 22.07 | 1.88E-01 | 49.08   | 119.41 | 6.81E-01 | 174.41 | 87.27 | 4.57E-02 | 63.02  | 43.56 | 1.48E-01 |
| cg26796727 | 28.13  | 12.44 | 2.38E-02 | 28.09  | 29.71 | 3.44E-01 | 50.10   | 53.23  | 3.47E-01 | 18.27  | 15.49 | 2.38E-01 | 69.59  | 35.23 | 4.82E-02 |
| cg00731739 | 12.40  | 5.48  | 2.38E-02 | 25.63  | 12.78 | 4.48E-02 | -0.76   | 12.19  | 9.51E-01 | 12.28  | 7.52  | 1.03E-01 | 15.84  | 19.11 | 4.07E-01 |
| cg15146859 | 16.27  | 7.20  | 2.38E-02 | 46.32  | 31.30 | 1.39E-01 | 24.65   | 48.97  | 6.15E-01 | 13.82  | 7.89  | 8.00E-02 | 19.06  | 23.39 | 4.15E-01 |
| cg16023600 | -12.93 | 5.72  | 2.38E-02 | -15.09 | 10.63 | 1.56E-01 | -7.41   | 13.46  | 5.82E-01 | -13.71 | 8.93  | 1.25E-01 | -13.43 | 16.58 | 4.18E-01 |
| cg02577368 | 42.80  | 18.93 | 2.38E-02 | 38.54  | 54.63 | 4.80E-01 | -165.63 | 198.45 | 4.04E-01 | 44.83  | 21.31 | 3.54E-02 | 52.78  | 66.39 | 4.27E-01 |
| cg13223918 | 17.10  | 7.57  | 2.38E-02 | 6.88   | 19.92 | 7.30E-01 | 76.66   | 43.18  | 7.59E-02 | 18.93  | 8.39  | 2.41E-02 | -9.45  | 29.31 | 7.47E-01 |
| cg03098047 | 30.22  | 13.37 | 2.38E-02 | 26.97  | 13.88 | 5.20E-02 | 159.87  | 108.62 | 1.41E-01 | 113.97 | 70.49 | 1.06E-01 | 16.45  | 31.11 | 5.97E-01 |
| cg00583733 | 11.94  | 5.28  | 2.38E-02 | 11.01  | 7.49  | 1.42E-01 | 20.59   | 11.98  | 8.55E-02 | 17.31  | 14.07 | 2.19E-01 | 0.11   | 12.93 | 9.93E-01 |
| cg06180915 | 19.91  | 8.81  | 2.38E-02 | 14.87  | 10.68 | 1.64E-01 | 49.50   | 30.04  | 9.94E-02 | -38.76 | 57.16 | 4.98E-01 | 30.80  | 19.23 | 1.09E-01 |
| cg01149712 | 20.38  | 9.02  | 2.38E-02 | 25.93  | 18.43 | 1.60E-01 | 30.17   | 37.14  | 4.17E-01 | 16.08  | 11.48 | 1.61E-01 | 29.22  | 30.92 | 3.45E-01 |
| cg13912964 | 6.42   | 2.84  | 2.38E-02 | 5.26   | 3.76  | 1.62E-01 | 15.09   | 7.61   | 4.72E-02 | 9.22   | 7.16  | 1.98E-01 | -1.06  | 7.81  | 8.92E-01 |
| cg04663870 | -18.61 | 8.23  | 2.38E-02 | -19.77 | 10.47 | 5.89E-02 | -28.15  | 26.40  | 2.86E-01 | -20.57 | 47.84 | 6.67E-01 | -11.92 | 16.33 | 4.66E-01 |
| cg26204713 | -44.19 | 19.55 | 2.38E-02 | 2.61   | 61.40 | 9.66E-01 | -190.34 | 116.57 | 1.02E-01 | -44.33 | 22.25 | 4.63E-02 | -49.52 | 62.40 | 4.27E-01 |
| cg10260999 | -43.78 | 19.37 | 2.38E-02 | -52.34 | 25.29 | 3.85E-02 | -68.22  | 76.29  | 3.71E-01 | -57.81 | 62.12 | 3.52E-01 | -12.17 | 38.60 | 7.53E-01 |
| cg16986298 | -24.49 | 10.84 | 2.38E-02 | -70.10 | 34.32 | 4.11E-02 | -72.25  | 160.66 | 6.53E-01 | -17.42 | 11.85 | 1.42E-01 | -43.66 | 44.32 | 3.25E-01 |
| cg02957150 | -13.09 | 5.79  | 2.38E-02 | -15.42 | 7.41  | 3.73E-02 | -15.90  | 18.12  | 3.80E-01 | -19.11 | 35.86 | 5.94E-01 | -5.90  | 11.36 | 6.03E-01 |
| cg21473142 | 9.54   | 4.22  | 2.38E-02 | 10.31  | 7.50  | 1.69E-01 | 24.44   | 12.59  | 5.23E-02 | 5.40   | 6.77  | 4.26E-01 | 7.85   | 9.90  | 4.28E-01 |
| cg27039237 | 19.41  | 8.59  | 2.38E-02 | 50.30  | 24.54 | 4.04E-02 | 55.60   | 53.48  | 2.99E-01 | 15.57  | 9.64  | 1.06E-01 | -9.49  | 35.74 | 7.91E-01 |
| cg01177796 | -19.50 | 8.63  | 2.38E-02 | -2.14  | 16.69 | 8.98E-01 | 13.65   | 65.07  | 8.34E-01 | -27.85 | 11.14 | 1.25E-02 | -21.40 | 25.37 | 3.99E-01 |
| cg18218752 | 19.72  | 8.73  | 2.38E-02 | 32.06  | 17.07 | 6.03E-02 | 6.52    | 20.56  | 7.51E-01 | 26.41  | 12.78 | 3.87E-02 | -15.98 | 26.41 | 5.45E-01 |
| cg14143887 | -14.78 | 6.54  | 2.38E-02 | -10.02 | 15.76 | 5.25E-01 | -12.62  | 27.36  | 6.45E-01 | -17.08 | 7.96  | 3.18E-02 | -8.37  | 21.21 | 6.93E-01 |
| cg03749154 | -7.81  | 3.45  | 2.38E-02 | -14.80 | 8.47  | 8.05E-02 | -17.16  | 13.11  | 1.91E-01 | -5.17  | 4.38  | 2.38E-01 | -6.59  | 9.14  | 4.71E-01 |
| cg15650161 | -13.75 | 6.08  | 2.38E-02 | -22.42 | 9.94  | 2.41E-02 | 5.48    | 13.79  | 6.91E-01 | -17.63 | 11.94 | 1.40E-01 | -10.74 | 14.69 | 4.64E-01 |
| cg15345477 | -6.36  | 2.82  | 2.38E-02 | -7.69  | 4.33  | 7.60E-02 | -5.23   | 7.01   | 4.56E-01 | -0.90  | 6.05  | 8.82E-01 | -10.39 | 6.29  | 9.87E-02 |
| cg10143323 | -16.40 | 7.26  | 2.38E-02 | -10.52 | 19.35 | 5.87E-01 | 35.82   | 32.83  | 2.75E-01 | -19.72 | 8.34  | 1.81E-02 | -29.71 | 27.84 | 2.86E-01 |
| cg00076797 | -11.45 | 5.07  | 2.38E-02 | -16.97 | 9.47  | 7.32E-02 | -25.72  | 13.37  | 5.44E-02 | -1.18  | 8.20  | 8.85E-01 | -12.62 | 11.06 | 2.54E-01 |
| cg26802119 | 21.72  | 9.61  | 2.38E-02 | 6.61   | 9.83  | 5.01E-01 | 40.92   | 13.97  | 3.40E-03 | 40.06  | 21.13 | 5.80E-02 | 11.16  | 16.11 | 4.88E-01 |
| cg11292836 | -6.78  | 3.00  | 2.38E-02 | -6.30  | 5.15  | 2.21E-01 | -6.91   | 7.11   | 3.32E-01 | -7.79  | 5.06  | 1.24E-01 | -5.12  | 8.24  | 5.34E-01 |
| cg18534491 | 17.71  | 7.84  | 2.38E-02 | 26.90  | 13.41 | 4.49E-02 | 9.44    | 22.00  | 6.68E-01 | 9.51   | 14.78 | 5.20E-01 | 18.60  | 15.67 | 2.35E-01 |
| cg04927931 | 10.64  | 4.71  | 2.38E-02 | 16.73  | 10.50 | 1.11E-01 | 18.22   | 30.46  | 5.50E-01 | 7.08   | 5.85  | 2.26E-01 | 17.69  | 13.17 | 1.79E-01 |

|            |        |       |          |         |       |          |         |        |          |        |       |          |        |       |          |
|------------|--------|-------|----------|---------|-------|----------|---------|--------|----------|--------|-------|----------|--------|-------|----------|
| cg19836145 | -8.24  | 3.65  | 2.38E-02 | -1.35   | 7.47  | 8.56E-01 | -12.37  | 12.68  | 3.29E-01 | -8.31  | 5.01  | 9.72E-02 | -16.60 | 9.41  | 7.75E-02 |
| cg09174717 | 10.84  | 4.80  | 2.38E-02 | 11.27   | 8.76  | 1.98E-01 | -4.36   | 11.04  | 6.93E-01 | 17.25  | 7.56  | 2.24E-02 | 12.29  | 14.57 | 3.99E-01 |
| cg00947782 | 3.70   | 1.64  | 2.39E-02 | 2.39    | 2.42  | 3.22E-01 | 5.52    | 3.38   | 1.02E-01 | 7.10   | 4.64  | 1.26E-01 | 2.31   | 3.83  | 5.47E-01 |
| cg11036338 | 26.71  | 11.82 | 2.39E-02 | 72.13   | 37.82 | 5.65E-02 | 110.14  | 195.82 | 5.74E-01 | 21.47  | 12.80 | 9.34E-02 | 20.64  | 55.11 | 7.08E-01 |
| cg08737770 | -14.09 | 6.23  | 2.39E-02 | -14.40  | 13.65 | 2.92E-01 | -40.47  | 26.98  | 1.34E-01 | -10.61 | 7.78  | 1.73E-01 | -21.95 | 20.09 | 2.75E-01 |
| cg11857256 | 20.78  | 9.20  | 2.39E-02 | 38.12   | 17.13 | 2.60E-02 | 35.66   | 20.00  | 7.46E-02 | 7.89   | 6.17  | 2.01E-01 | 30.04  | 27.08 | 2.67E-01 |
| cg11427898 | 15.13  | 6.70  | 2.39E-02 | 18.89   | 14.89 | 2.05E-01 | -31.31  | 39.51  | 4.28E-01 | 14.99  | 8.36  | 7.28E-02 | 20.43  | 18.86 | 2.79E-01 |
| cg06943141 | -6.26  | 2.77  | 2.39E-02 | -4.94   | 4.20  | 2.40E-01 | -10.32  | 5.42   | 5.70E-02 | -7.39  | 8.68  | 3.95E-01 | -3.30  | 6.17  | 5.93E-01 |
| cg11458498 | -6.46  | 2.86  | 2.39E-02 | -3.12   | 4.73  | 5.10E-01 | -7.86   | 8.97   | 3.81E-01 | -9.45  | 4.68  | 4.36E-02 | -6.23  | 7.12  | 3.82E-01 |
| cg19363466 | 19.60  | 8.68  | 2.39E-02 | -3.88   | 24.54 | 8.74E-01 | 10.41   | 55.65  | 8.52E-01 | 27.73  | 11.95 | 2.03E-02 | 16.12  | 15.25 | 2.91E-01 |
| cg07715041 | -13.11 | 5.80  | 2.39E-02 | -24.38  | 10.42 | 1.93E-02 | -4.45   | 17.89  | 8.04E-01 | -4.82  | 9.02  | 5.93E-01 | -18.08 | 14.05 | 1.98E-01 |
| cg16201146 | -11.45 | 5.07  | 2.39E-02 | -10.78  | 8.35  | 1.97E-01 | -8.58   | 12.02  | 4.76E-01 | -14.39 | 9.81  | 1.42E-01 | -11.29 | 11.71 | 3.35E-01 |
| cg21380181 | -17.89 | 7.92  | 2.39E-02 | -19.80  | 10.47 | 5.87E-02 | -22.44  | 30.76  | 4.66E-01 | 5.44   | 26.05 | 8.35E-01 | -20.74 | 15.27 | 1.74E-01 |
| cg06652085 | 11.83  | 5.24  | 2.39E-02 | 14.93   | 7.02  | 3.35E-02 | 13.38   | 12.37  | 2.80E-01 | 12.18  | 16.11 | 4.50E-01 | -1.02  | 13.15 | 9.38E-01 |
| cg11314668 | -14.63 | 6.47  | 2.39E-02 | -26.11  | 10.63 | 1.40E-02 | -4.23   | 13.76  | 7.58E-01 | -14.68 | 15.58 | 3.46E-01 | -6.25  | 13.36 | 6.40E-01 |
| cg25173971 | 23.25  | 10.29 | 2.39E-02 | 22.00   | 37.14 | 5.54E-01 | -10.25  | 180.27 | 9.55E-01 | 26.21  | 11.01 | 1.73E-02 | -29.22 | 48.32 | 5.45E-01 |
| cg13217590 | 28.14  | 12.46 | 2.39E-02 | 41.93   | 19.15 | 2.86E-02 | 40.80   | 37.17  | 2.72E-01 | 20.08  | 30.18 | 5.06E-01 | 8.12   | 22.98 | 7.24E-01 |
| cg10959664 | -13.74 | 6.08  | 2.39E-02 | 0.73    | 15.35 | 9.62E-01 | 10.12   | 29.36  | 7.30E-01 | -17.59 | 7.09  | 1.31E-02 | -20.91 | 24.03 | 3.84E-01 |
| cg02527030 | -13.17 | 5.83  | 2.39E-02 | -18.04  | 12.86 | 1.61E-01 | -12.86  | 18.65  | 4.90E-01 | -13.74 | 7.49  | 6.66E-02 | 1.37   | 19.40 | 9.44E-01 |
| cg00399139 | -26.13 | 11.57 | 2.39E-02 | -43.55  | 22.29 | 5.07E-02 | -1.34   | 52.03  | 9.79E-01 | -23.80 | 15.57 | 1.26E-01 | -9.23  | 32.23 | 7.74E-01 |
| cg20443501 | 13.88  | 6.15  | 2.39E-02 | 16.31   | 8.71  | 6.11E-02 | 19.87   | 13.94  | 1.54E-01 | 23.12  | 17.86 | 1.95E-01 | -4.50  | 14.16 | 7.51E-01 |
| cg06495961 | 11.33  | 5.02  | 2.39E-02 | 19.67   | 6.97  | 4.79E-03 | 8.57    | 10.40  | 4.10E-01 | 17.23  | 14.34 | 2.29E-01 | -0.09  | 8.34  | 9.91E-01 |
| cg19826864 | 21.98  | 9.73  | 2.39E-02 | 17.72   | 12.66 | 1.62E-01 | 12.13   | 34.60  | 7.26E-01 | -50.01 | 63.50 | 4.31E-01 | 38.22  | 17.57 | 2.96E-02 |
| cg21886851 | -54.09 | 23.95 | 2.39E-02 | -114.26 | 53.70 | 3.34E-02 | -367.60 | 243.35 | 1.31E-01 | -40.62 | 16.71 | 1.51E-02 | -23.93 | 64.97 | 7.13E-01 |
| cg23737049 | -16.90 | 7.48  | 2.39E-02 | -14.96  | 11.39 | 1.89E-01 | -13.88  | 16.08  | 3.88E-01 | -37.27 | 22.59 | 9.90E-02 | -13.83 | 15.20 | 3.63E-01 |
| cg09384400 | 19.93  | 8.82  | 2.39E-02 | 21.79   | 16.42 | 1.84E-01 | 19.71   | 16.36  | 2.28E-01 | 7.13   | 19.89 | 7.20E-01 | 29.05  | 18.65 | 1.19E-01 |
| cg06713671 | 13.59  | 6.02  | 2.39E-02 | 12.01   | 8.14  | 1.40E-01 | 16.08   | 12.90  | 2.12E-01 | 14.04  | 19.07 | 4.61E-01 | 15.61  | 16.33 | 3.39E-01 |
| cg10451724 | 18.76  | 8.31  | 2.39E-02 | 16.47   | 15.18 | 2.78E-01 | 22.98   | 15.36  | 1.35E-01 | 8.28   | 15.42 | 5.91E-01 | 39.87  | 24.18 | 9.91E-02 |
| cg15481483 | 22.17  | 9.82  | 2.39E-02 | 20.82   | 13.61 | 1.26E-01 | 6.60    | 21.71  | 7.61E-01 | 57.56  | 30.77 | 6.14E-02 | 23.81  | 23.58 | 3.13E-01 |
| cg13954457 | 9.83   | 4.35  | 2.39E-02 | 20.61   | 8.90  | 2.07E-02 | 5.65    | 10.15  | 5.78E-01 | 3.01   | 8.78  | 7.32E-01 | 9.45   | 7.57  | 2.12E-01 |
| cg00643222 | -8.88  | 3.93  | 2.39E-02 | -3.75   | 8.79  | 6.69E-01 | -5.49   | 14.25  | 7.00E-01 | -12.33 | 5.05  | 1.47E-02 | -2.04  | 11.45 | 8.59E-01 |
| cg11422695 | 16.05  | 7.11  | 2.39E-02 | 15.04   | 16.36 | 3.58E-01 | 6.23    | 37.48  | 8.68E-01 | 15.24  | 8.50  | 7.31E-02 | 30.66  | 25.74 | 2.34E-01 |
| cg03316359 | -15.55 | 6.89  | 2.39E-02 | -21.25  | 11.39 | 6.20E-02 | -21.66  | 14.91  | 1.46E-01 | 4.53   | 15.48 | 7.70E-01 | -18.16 | 14.57 | 2.13E-01 |
| cg03550794 | 24.84  | 11.00 | 2.40E-02 | 4.57    | 26.83 | 8.65E-01 | 7.48    | 86.35  | 9.31E-01 | 28.75  | 13.06 | 2.77E-02 | 33.50  | 33.84 | 3.22E-01 |
| cg06547175 | 24.63  | 10.91 | 2.40E-02 | 28.99   | 20.65 | 1.60E-01 | 7.93    | 22.40  | 7.23E-01 | 16.63  | 20.31 | 4.13E-01 | 50.47  | 24.68 | 4.08E-02 |

|            |        |       |          |        |       |          |         |        |          |        |       |          |        |       |          |
|------------|--------|-------|----------|--------|-------|----------|---------|--------|----------|--------|-------|----------|--------|-------|----------|
| cg10156714 | -12.97 | 5.74  | 2.40E-02 | -17.04 | 16.99 | 3.16E-01 | 11.14   | 32.04  | 7.28E-01 | -13.61 | 6.50  | 3.63E-02 | -10.33 | 21.20 | 6.26E-01 |
| cg27233989 | 15.81  | 7.00  | 2.40E-02 | 30.09  | 21.26 | 1.57E-01 | 23.58   | 44.23  | 5.94E-01 | 13.31  | 8.09  | 1.00E-01 | 16.91  | 20.39 | 4.07E-01 |
| cg25140190 | 6.52   | 2.89  | 2.40E-02 | 2.01   | 4.32  | 6.41E-01 | 10.03   | 6.80   | 1.40E-01 | 10.54  | 6.61  | 1.11E-01 | 9.98   | 6.81  | 1.43E-01 |
| cg08222702 | -20.61 | 9.13  | 2.40E-02 | -13.43 | 13.37 | 3.15E-01 | -14.26  | 19.34  | 4.61E-01 | -59.39 | 30.13 | 4.87E-02 | -26.09 | 19.50 | 1.81E-01 |
| cg15553814 | -10.04 | 4.45  | 2.40E-02 | -3.26  | 8.92  | 7.15E-01 | -4.74   | 18.48  | 7.97E-01 | -15.23 | 5.81  | 8.75E-03 | -0.36  | 13.49 | 9.79E-01 |
| cg08446038 | 10.59  | 4.69  | 2.40E-02 | 16.16  | 6.30  | 1.04E-02 | 7.83    | 11.32  | 4.89E-01 | 3.82   | 19.63 | 8.46E-01 | 0.36   | 10.06 | 9.72E-01 |
| cg14241836 | -8.49  | 3.76  | 2.40E-02 | -7.73  | 5.35  | 1.48E-01 | -16.26  | 10.33  | 1.16E-01 | 1.07   | 8.00  | 8.93E-01 | -18.06 | 9.63  | 6.07E-02 |
| cg01406988 | 8.09   | 3.59  | 2.40E-02 | 2.16   | 7.44  | 7.72E-01 | 5.21    | 10.35  | 6.15E-01 | 12.12  | 5.07  | 1.69E-02 | 6.18   | 9.31  | 5.07E-01 |
| cg16397620 | 17.55  | 7.77  | 2.40E-02 | 33.21  | 21.21 | 1.17E-01 | 8.48    | 71.52  | 9.06E-01 | 15.38  | 8.82  | 8.13E-02 | 13.57  | 28.01 | 6.28E-01 |
| cg19929638 | 6.28   | 2.78  | 2.40E-02 | 3.59   | 4.04  | 3.73E-01 | 3.53    | 5.96   | 5.54E-01 | 2.96   | 10.50 | 7.78E-01 | 14.65  | 5.55  | 8.30E-03 |
| cg22949004 | 19.53  | 8.65  | 2.40E-02 | 0.70   | 14.38 | 9.61E-01 | 31.65   | 15.88  | 4.63E-02 | 28.23  | 21.20 | 1.83E-01 | 29.68  | 20.69 | 1.52E-01 |
| cg00489539 | -11.85 | 5.25  | 2.40E-02 | -7.52  | 14.43 | 6.02E-01 | -5.89   | 29.91  | 8.44E-01 | -10.55 | 5.95  | 7.62E-02 | -42.08 | 21.71 | 5.26E-02 |
| cg18626346 | 32.29  | 14.30 | 2.40E-02 | 39.94  | 34.12 | 2.42E-01 | 95.49   | 117.68 | 4.17E-01 | 34.77  | 16.90 | 3.96E-02 | -11.41 | 46.96 | 8.08E-01 |
| cg14395791 | 14.18  | 6.28  | 2.40E-02 | 25.24  | 10.59 | 1.71E-02 | 6.07    | 11.42  | 5.95E-01 | 7.03   | 14.27 | 6.22E-01 | 13.85  | 16.13 | 3.91E-01 |
| cg04564920 | 17.63  | 7.81  | 2.40E-02 | 4.60   | 23.89 | 8.47E-01 | -6.87   | 73.49  | 9.26E-01 | 18.93  | 8.65  | 2.85E-02 | 26.90  | 30.52 | 3.78E-01 |
| cg24803290 | 20.25  | 8.97  | 2.40E-02 | 29.27  | 24.89 | 2.40E-01 | -12.09  | 129.91 | 9.26E-01 | 19.31  | 9.95  | 5.22E-02 | 15.34  | 39.07 | 6.95E-01 |
| cg15420785 | 26.26  | 11.63 | 2.40E-02 | 31.05  | 24.89 | 2.12E-01 | 26.40   | 51.68  | 6.09E-01 | 24.65  | 14.83 | 9.65E-02 | 25.71  | 34.22 | 4.53E-01 |
| cg19811337 | 33.88  | 15.01 | 2.40E-02 | 28.25  | 19.60 | 1.50E-01 | 91.33   | 70.61  | 1.96E-01 | 57.54  | 41.46 | 1.65E-01 | 23.79  | 30.79 | 4.40E-01 |
| cg04125710 | 26.59  | 11.78 | 2.40E-02 | 21.37  | 17.97 | 2.34E-01 | 54.33   | 25.34  | 3.20E-02 | 2.90   | 32.35 | 9.29E-01 | 23.84  | 25.02 | 3.41E-01 |
| cg04495270 | 9.61   | 4.26  | 2.40E-02 | 12.88  | 6.24  | 3.91E-02 | -1.52   | 9.26   | 8.69E-01 | 23.17  | 16.92 | 1.71E-01 | 9.50   | 8.35  | 2.55E-01 |
| cg19317258 | -11.49 | 5.09  | 2.40E-02 | -17.28 | 8.07  | 3.21E-02 | -17.86  | 10.37  | 8.50E-02 | -1.84  | 16.23 | 9.10E-01 | -0.47  | 9.94  | 9.62E-01 |
| cg01601476 | 14.25  | 6.31  | 2.40E-02 | 15.94  | 9.60  | 9.66E-02 | 23.85   | 18.67  | 2.01E-01 | 16.75  | 12.93 | 1.95E-01 | 2.92   | 13.64 | 8.31E-01 |
| cg21913652 | -9.33  | 4.13  | 2.40E-02 | -19.98 | 10.93 | 6.75E-02 | -3.30   | 15.30  | 8.29E-01 | -6.54  | 4.94  | 1.85E-01 | -19.91 | 14.39 | 1.67E-01 |
| cg06747362 | 19.42  | 8.61  | 2.40E-02 | 11.84  | 15.96 | 4.58E-01 | -11.52  | 33.10  | 7.28E-01 | 21.37  | 11.91 | 7.28E-02 | 46.87  | 24.89 | 5.97E-02 |
| cg05661533 | 9.39   | 4.16  | 2.40E-02 | 8.64   | 5.82  | 1.38E-01 | 8.84    | 9.47   | 3.50E-01 | 18.64  | 10.27 | 6.94E-02 | 1.63   | 11.41 | 8.86E-01 |
| cg13766589 | 23.96  | 10.61 | 2.40E-02 | 20.97  | 16.18 | 1.95E-01 | 29.83   | 23.52  | 2.05E-01 | 3.71   | 22.50 | 8.69E-01 | 55.99  | 28.03 | 4.58E-02 |
| cg11227621 | 35.27  | 15.63 | 2.40E-02 | -1.03  | 44.47 | 9.81E-01 | -229.23 | 195.45 | 2.41E-01 | 43.12  | 17.99 | 1.65E-02 | 37.39  | 45.96 | 4.16E-01 |
| cg23491599 | 16.00  | 7.09  | 2.40E-02 | 43.29  | 18.97 | 2.25E-02 | -26.63  | 57.73  | 6.45E-01 | 13.01  | 8.40  | 1.22E-01 | 8.22   | 19.37 | 6.71E-01 |
| cg15623249 | 17.91  | 7.94  | 2.40E-02 | 13.78  | 22.69 | 5.44E-01 | -34.89  | 50.70  | 4.91E-01 | 21.38  | 8.98  | 1.73E-02 | 5.40   | 29.46 | 8.55E-01 |
| cg08881785 | -8.05  | 3.57  | 2.40E-02 | -6.04  | 7.02  | 3.90E-01 | -1.20   | 12.66  | 9.25E-01 | -9.83  | 4.92  | 4.58E-02 | -8.96  | 9.61  | 3.51E-01 |
| cg18085807 | 27.27  | 12.09 | 2.40E-02 | -2.60  | 31.01 | 9.33E-01 | -120.74 | 141.46 | 3.93E-01 | 31.95  | 13.68 | 1.95E-02 | 59.76  | 49.07 | 2.23E-01 |
| cg11394278 | -8.73  | 3.87  | 2.40E-02 | -8.63  | 7.54  | 2.53E-01 | -7.55   | 15.15  | 6.18E-01 | -7.49  | 5.19  | 1.49E-01 | -15.56 | 11.36 | 1.71E-01 |
| cg06005891 | 14.37  | 6.37  | 2.40E-02 | 9.11   | 16.79 | 5.87E-01 | 33.09   | 26.90  | 2.19E-01 | 16.24  | 7.85  | 3.85E-02 | 3.61   | 16.94 | 8.31E-01 |
| cg21958743 | -8.16  | 3.62  | 2.40E-02 | -11.75 | 8.16  | 1.50E-01 | 0.76    | 13.31  | 9.54E-01 | -7.35  | 4.71  | 1.19E-01 | -11.25 | 9.65  | 2.44E-01 |
| cg24979233 | -28.63 | 12.69 | 2.40E-02 | -45.21 | 22.57 | 4.52E-02 | -34.39  | 61.52  | 5.76E-01 | -49.42 | 27.60 | 7.33E-02 | -5.66  | 19.34 | 7.70E-01 |

|            |        |       |          |        |       |          |         |        |          |        |       |          |        |       |          |
|------------|--------|-------|----------|--------|-------|----------|---------|--------|----------|--------|-------|----------|--------|-------|----------|
| cg17506621 | 4.94   | 2.19  | 2.40E-02 | 5.25   | 3.01  | 8.05E-02 | 0.74    | 5.37   | 8.90E-01 | 6.88   | 8.11  | 3.96E-01 | 6.63   | 4.56  | 1.46E-01 |
| cg07701579 | -12.91 | 5.72  | 2.41E-02 | -18.39 | 8.95  | 4.00E-02 | -11.44  | 12.76  | 3.70E-01 | -4.97  | 14.63 | 7.34E-01 | -9.84  | 11.74 | 4.02E-01 |
| cg19399370 | -11.77 | 5.22  | 2.41E-02 | -4.93  | 12.90 | 7.02E-01 | -31.16  | 28.24  | 2.70E-01 | -12.16 | 6.18  | 4.89E-02 | -13.75 | 17.48 | 4.32E-01 |
| cg08008636 | -49.95 | 22.14 | 2.41E-02 | -39.20 | 28.15 | 1.64E-01 | 30.97   | 90.04  | 7.31E-01 | -89.00 | 57.89 | 1.24E-01 | -83.33 | 52.98 | 1.16E-01 |
| cg13770399 | 7.27   | 3.22  | 2.41E-02 | 8.67   | 4.22  | 4.00E-02 | 9.22    | 8.31   | 2.67E-01 | 6.98   | 11.29 | 5.36E-01 | 1.42   | 7.51  | 8.50E-01 |
| cg03575765 | -8.93  | 3.96  | 2.41E-02 | -6.65  | 6.34  | 2.94E-01 | -7.61   | 7.44   | 3.06E-01 | -27.16 | 12.08 | 2.45E-02 | -5.77  | 8.46  | 4.95E-01 |
| cg00899659 | 7.07   | 3.13  | 2.41E-02 | 6.33   | 4.13  | 1.25E-01 | 16.26   | 7.59   | 3.23E-02 | 4.06   | 10.67 | 7.04E-01 | 1.84   | 7.62  | 8.09E-01 |
| cg27598107 | 6.33   | 2.80  | 2.41E-02 | 8.32   | 3.88  | 3.23E-02 | 7.93    | 5.77   | 1.70E-01 | 7.71   | 10.44 | 4.60E-01 | -2.56  | 6.79  | 7.07E-01 |
| cg02334987 | -7.17  | 3.18  | 2.41E-02 | -4.21  | 4.36  | 3.34E-01 | -14.49  | 8.80   | 9.97E-02 | -12.47 | 9.85  | 2.06E-01 | -7.46  | 6.57  | 2.56E-01 |
| cg06750832 | 19.39  | 8.60  | 2.41E-02 | 5.12   | 31.98 | 8.73E-01 | -132.71 | 115.91 | 2.52E-01 | 20.62  | 9.29  | 2.64E-02 | 31.80  | 33.54 | 3.43E-01 |
| cg10220895 | -6.45  | 2.86  | 2.41E-02 | -2.82  | 4.48  | 5.29E-01 | -7.41   | 6.80   | 2.76E-01 | -11.73 | 6.83  | 8.57E-02 | -8.04  | 5.83  | 1.68E-01 |
| cg10294329 | 12.81  | 5.68  | 2.41E-02 | -5.50  | 13.26 | 6.78E-01 | 17.66   | 20.15  | 3.81E-01 | 16.73  | 6.92  | 1.56E-02 | 17.98  | 22.37 | 4.22E-01 |
| cg21216258 | 6.51   | 2.89  | 2.41E-02 | 4.55   | 3.93  | 2.47E-01 | 10.04   | 7.45   | 1.78E-01 | 14.09  | 7.10  | 4.72E-02 | 1.52   | 7.56  | 8.40E-01 |
| cg23646360 | -7.37  | 3.27  | 2.41E-02 | -4.32  | 4.52  | 3.39E-01 | -8.72   | 6.86   | 2.04E-01 | -15.23 | 16.86 | 3.66E-01 | -12.06 | 7.09  | 8.89E-02 |
| cg01069104 | 17.34  | 7.69  | 2.41E-02 | 12.15  | 9.32  | 1.92E-01 | 20.37   | 35.62  | 5.67E-01 | 0.59   | 57.88 | 9.92E-01 | 31.78  | 15.21 | 3.67E-02 |
| cg23012054 | -13.47 | 5.97  | 2.41E-02 | -20.12 | 13.50 | 1.36E-01 | -0.86   | 17.55  | 9.61E-01 | -14.12 | 7.87  | 7.28E-02 | -11.56 | 17.78 | 5.15E-01 |
| cg20171011 | -11.47 | 5.08  | 2.41E-02 | -21.62 | 8.48  | 1.07E-02 | 1.55    | 12.52  | 9.02E-01 | -9.16  | 10.64 | 3.89E-01 | -7.50  | 10.23 | 4.63E-01 |
| cg17161419 | -10.63 | 4.71  | 2.41E-02 | -13.99 | 7.27  | 5.43E-02 | -4.66   | 9.05   | 6.07E-01 | -29.81 | 16.23 | 6.62E-02 | -4.33  | 9.97  | 6.64E-01 |
| cg20385461 | -7.64  | 3.39  | 2.41E-02 | -10.19 | 6.71  | 1.29E-01 | -17.55  | 8.53   | 3.97E-02 | -4.72  | 4.94  | 3.40E-01 | -0.53  | 9.87  | 9.57E-01 |
| cg22283754 | -18.43 | 8.17  | 2.41E-02 | -11.21 | 20.77 | 5.89E-01 | 19.51   | 30.33  | 5.20E-01 | -19.00 | 8.60  | 2.71E-02 | -47.58 | 23.57 | 4.35E-02 |
| cg17321561 | -28.21 | 12.50 | 2.41E-02 | -27.05 | 22.62 | 2.32E-01 | -58.06  | 47.68  | 2.23E-01 | -37.08 | 12.80 | 3.76E-03 | 29.48  | 35.13 | 4.01E-01 |
| cg20758789 | -10.59 | 4.69  | 2.41E-02 | -20.14 | 9.39  | 3.19E-02 | -6.16   | 12.24  | 6.15E-01 | -5.93  | 7.06  | 4.00E-01 | -12.60 | 11.72 | 2.83E-01 |
| cg13618111 | -14.41 | 6.39  | 2.41E-02 | -17.53 | 11.64 | 1.32E-01 | -10.24  | 17.80  | 5.65E-01 | -13.38 | 10.68 | 2.10E-01 | -14.25 | 13.89 | 3.05E-01 |
| cg01077808 | -34.42 | 15.26 | 2.41E-02 | -63.71 | 39.41 | 1.06E-01 | -51.11  | 191.82 | 7.90E-01 | -30.83 | 17.68 | 8.12E-02 | -16.02 | 48.58 | 7.42E-01 |
| cg20767977 | 14.67  | 6.50  | 2.41E-02 | 20.50  | 16.64 | 2.18E-01 | 38.66   | 42.86  | 3.67E-01 | 12.36  | 7.49  | 9.86E-02 | 19.00  | 24.73 | 4.42E-01 |
| cg17596554 | -28.44 | 12.61 | 2.41E-02 | -21.24 | 17.18 | 2.16E-01 | -19.47  | 37.09  | 6.00E-01 | -66.15 | 54.70 | 2.27E-01 | -38.38 | 23.30 | 9.95E-02 |
| cg06526620 | 7.78   | 3.45  | 2.41E-02 | 6.57   | 4.34  | 1.30E-01 | 14.93   | 8.80   | 8.98E-02 | 3.39   | 11.96 | 7.77E-01 | 8.04   | 9.52  | 3.99E-01 |
| cg24398933 | 22.56  | 10.00 | 2.41E-02 | 28.39  | 18.65 | 1.28E-01 | 6.75    | 19.74  | 7.32E-01 | 29.35  | 17.56 | 9.47E-02 | 23.92  | 27.59 | 3.86E-01 |
| cg21117476 | 17.66  | 7.83  | 2.41E-02 | 49.41  | 18.36 | 7.12E-03 | 20.49   | 23.83  | 3.90E-01 | 12.01  | 9.66  | 2.13E-01 | 9.15   | 10.98 | 4.05E-01 |
| cg09414983 | -7.21  | 3.19  | 2.41E-02 | -12.25 | 5.42  | 2.37E-02 | 0.87    | 6.93   | 9.00E-01 | -10.51 | 4.56  | 2.12E-02 | -0.35  | 7.39  | 9.62E-01 |
| cg11188027 | -50.29 | 22.30 | 2.41E-02 | -67.70 | 27.79 | 1.49E-02 | -11.65  | 98.53  | 9.06E-01 | -68.39 | 92.59 | 4.60E-01 | -8.70  | 44.86 | 8.46E-01 |
| cg15677294 | 16.29  | 7.22  | 2.41E-02 | 7.90   | 10.85 | 4.67E-01 | 20.37   | 14.30  | 1.54E-01 | 14.13  | 22.19 | 5.24E-01 | 31.17  | 16.34 | 5.64E-02 |
| cg15690853 | 18.19  | 8.06  | 2.41E-02 | 28.92  | 16.58 | 8.10E-02 | 3.59    | 32.15  | 9.11E-01 | 13.45  | 10.56 | 2.03E-01 | 27.96  | 23.57 | 2.35E-01 |
| cg06707978 | 12.26  | 5.44  | 2.41E-02 | 23.51  | 8.89  | 8.19E-03 | 5.64    | 14.09  | 6.89E-01 | 1.01   | 10.23 | 9.22E-01 | 12.20  | 11.96 | 3.08E-01 |
| cg07821629 | 20.54  | 9.11  | 2.41E-02 | 17.53  | 27.65 | 5.26E-01 | 48.11   | 66.45  | 4.69E-01 | 20.39  | 10.47 | 5.14E-02 | 19.88  | 26.85 | 4.59E-01 |

|            |        |       |          |        |       |          |         |        |          |        |        |          |        |       |          |
|------------|--------|-------|----------|--------|-------|----------|---------|--------|----------|--------|--------|----------|--------|-------|----------|
| cg23342234 | 19.47  | 8.63  | 2.41E-02 | 36.52  | 15.05 | 1.53E-02 | 11.15   | 15.40  | 4.69E-01 | 12.78  | 19.37  | 5.10E-01 | 8.92   | 21.73 | 6.81E-01 |
| cg00065302 | 15.78  | 7.00  | 2.41E-02 | 18.04  | 12.79 | 1.58E-01 | 10.06   | 14.81  | 4.97E-01 | 11.95  | 13.78  | 3.86E-01 | 22.97  | 14.92 | 1.24E-01 |
| cg14479344 | 6.27   | 2.78  | 2.41E-02 | 8.53   | 4.25  | 4.46E-02 | 8.26    | 6.57   | 2.09E-01 | 4.72   | 6.32   | 4.55E-01 | 1.10   | 6.26  | 8.61E-01 |
| cg01036779 | -18.62 | 8.26  | 2.41E-02 | -14.26 | 12.76 | 2.64E-01 | -24.05  | 24.82  | 3.32E-01 | -27.29 | 16.34  | 9.49E-02 | -14.03 | 17.82 | 4.31E-01 |
| cg06470424 | -24.77 | 10.99 | 2.42E-02 | -25.70 | 15.31 | 9.31E-02 | -23.08  | 23.06  | 3.17E-01 | -32.95 | 33.92  | 3.31E-01 | -18.54 | 28.10 | 5.09E-01 |
| cg10981907 | 8.53   | 3.78  | 2.42E-02 | 11.59  | 5.48  | 3.44E-02 | 10.15   | 9.56   | 2.88E-01 | 20.40  | 13.04  | 1.18E-01 | -1.10  | 7.13  | 8.78E-01 |
| cg08849875 | 17.67  | 7.84  | 2.42E-02 | 10.14  | 13.16 | 4.41E-01 | -2.15   | 19.61  | 9.13E-01 | 16.97  | 6.02   | 4.85E-03 | 51.39  | 18.79 | 6.23E-03 |
| cg23147393 | 12.34  | 5.47  | 2.42E-02 | 12.98  | 9.52  | 1.73E-01 | 3.85    | 11.96  | 7.47E-01 | 13.74  | 9.82   | 1.62E-01 | 19.84  | 14.12 | 1.60E-01 |
| cg08322194 | -14.16 | 6.28  | 2.42E-02 | -12.73 | 9.04  | 1.59E-01 | -0.83   | 14.30  | 9.54E-01 | -33.34 | 20.29  | 1.00E-01 | -20.37 | 13.13 | 1.21E-01 |
| cg05928980 | -9.63  | 4.27  | 2.42E-02 | -12.06 | 9.65  | 2.11E-01 | -16.95  | 11.08  | 1.26E-01 | -9.48  | 5.98   | 1.13E-01 | 0.68   | 11.24 | 9.52E-01 |
| cg26329538 | 13.25  | 5.88  | 2.42E-02 | 12.06  | 11.10 | 2.77E-01 | 34.84   | 14.55  | 1.66E-02 | 10.83  | 7.70   | 1.60E-01 | -3.77  | 17.43 | 8.29E-01 |
| cg06281694 | -41.18 | 18.27 | 2.42E-02 | -52.53 | 22.89 | 2.17E-02 | -92.31  | 52.32  | 7.77E-02 | -18.94 | 63.01  | 7.64E-01 | 10.87  | 39.27 | 7.82E-01 |
| cg03013070 | 10.94  | 4.85  | 2.42E-02 | 15.28  | 7.94  | 5.44E-02 | 8.49    | 11.73  | 4.69E-01 | 6.60   | 8.69   | 4.47E-01 | 11.98  | 12.80 | 3.49E-01 |
| cg02937233 | -43.53 | 19.31 | 2.42E-02 | -54.73 | 23.79 | 2.14E-02 | -47.93  | 94.77  | 6.13E-01 | 31.73  | 63.87  | 6.19E-01 | -40.25 | 42.34 | 3.42E-01 |
| cg11001581 | 8.12   | 3.60  | 2.42E-02 | 9.04   | 5.76  | 1.16E-01 | 13.95   | 7.01   | 4.67E-02 | -4.15  | 9.53   | 6.63E-01 | 7.42   | 8.03  | 3.56E-01 |
| cg14568936 | -36.92 | 16.38 | 2.42E-02 | -59.77 | 48.61 | 2.19E-01 | -133.41 | 217.30 | 5.39E-01 | -35.13 | 18.27  | 5.45E-02 | -14.83 | 58.96 | 8.01E-01 |
| cg01273565 | 33.19  | 14.73 | 2.42E-02 | 42.87  | 20.48 | 3.64E-02 | 38.61   | 39.00  | 3.22E-01 | 40.78  | 43.80  | 3.52E-01 | 4.02   | 30.89 | 8.97E-01 |
| cg11201772 | 38.53  | 17.10 | 2.42E-02 | 29.11  | 20.96 | 1.65E-01 | 9.94    | 75.25  | 8.95E-01 | 81.73  | 63.63  | 1.99E-01 | 60.48  | 37.24 | 1.04E-01 |
| cg04560098 | -11.52 | 5.11  | 2.42E-02 | -18.20 | 7.37  | 1.35E-02 | -10.22  | 12.71  | 4.21E-01 | 0.75   | 13.80  | 9.57E-01 | -5.51  | 10.92 | 6.14E-01 |
| cg26031742 | 30.87  | 13.70 | 2.42E-02 | 55.92  | 20.34 | 5.97E-03 | 4.86    | 20.34  | 8.11E-01 | 14.51  | 14.31  | 3.11E-01 | 62.36  | 26.10 | 1.69E-02 |
| cg21333861 | 42.44  | 18.83 | 2.42E-02 | 35.67  | 38.68 | 3.57E-01 | 35.19   | 151.36 | 8.16E-01 | 35.00  | 24.10  | 1.46E-01 | 88.05  | 50.84 | 8.33E-02 |
| cg04600297 | 11.58  | 5.14  | 2.42E-02 | 17.90  | 7.18  | 1.27E-02 | 18.76   | 10.66  | 7.83E-02 | -0.71  | 13.10  | 9.57E-01 | -0.12  | 10.74 | 9.91E-01 |
| cg14328907 | 27.05  | 12.00 | 2.42E-02 | 31.56  | 31.54 | 3.17E-01 | 53.96   | 85.25  | 5.27E-01 | 26.26  | 13.91  | 5.90E-02 | 20.41  | 39.78 | 6.08E-01 |
| cg13767755 | 21.26  | 9.43  | 2.42E-02 | 31.16  | 13.70 | 2.29E-02 | 19.02   | 35.25  | 5.89E-01 | 42.62  | 38.31  | 2.66E-01 | 6.44   | 15.04 | 6.69E-01 |
| cg24033742 | -17.02 | 7.55  | 2.42E-02 | -15.02 | 21.52 | 4.85E-01 | -46.24  | 27.27  | 9.00E-02 | -17.33 | 8.80   | 4.89E-02 | 17.88  | 29.90 | 5.50E-01 |
| cg20110591 | 23.63  | 10.48 | 2.42E-02 | 19.30  | 13.05 | 1.39E-01 | 32.91   | 37.23  | 3.77E-01 | 31.37  | 77.49  | 6.86E-01 | 31.06  | 20.66 | 1.33E-01 |
| cg14780449 | 10.39  | 4.61  | 2.42E-02 | 10.59  | 6.22  | 8.84E-02 | 14.43   | 12.17  | 2.36E-01 | 3.36   | 12.37  | 7.86E-01 | 12.08  | 11.25 | 2.83E-01 |
| cg11134777 | 20.15  | 8.94  | 2.42E-02 | 14.95  | 16.63 | 3.69E-01 | 12.58   | 15.56  | 4.19E-01 | 24.38  | 17.80  | 1.71E-01 | 42.97  | 24.94 | 8.49E-02 |
| cg17657467 | 18.49  | 8.20  | 2.42E-02 | 11.33  | 15.92 | 4.77E-01 | 13.22   | 35.81  | 7.12E-01 | 21.19  | 11.07  | 5.57E-02 | 23.74  | 22.51 | 2.92E-01 |
| cg03945122 | -21.06 | 9.34  | 2.42E-02 | -43.33 | 21.78 | 4.66E-02 | 12.40   | 47.15  | 7.93E-01 | -13.22 | 11.48  | 2.49E-01 | -42.20 | 27.70 | 1.28E-01 |
| cg07997104 | -53.85 | 23.90 | 2.42E-02 | -54.35 | 28.36 | 5.53E-02 | -126.06 | 168.22 | 4.54E-01 | -15.08 | 103.67 | 8.84E-01 | -55.00 | 51.36 | 2.84E-01 |
| cg01109333 | 16.72  | 7.42  | 2.42E-02 | 27.34  | 16.46 | 9.66E-02 | 14.67   | 20.76  | 4.80E-01 | 9.47   | 9.65   | 3.26E-01 | 47.77  | 26.72 | 7.38E-02 |
| cg04809093 | 14.58  | 6.47  | 2.43E-02 | 14.98  | 11.46 | 1.91E-01 | 4.42    | 16.71  | 7.91E-01 | 11.98  | 9.73   | 2.18E-01 | 43.19  | 21.71 | 4.66E-02 |
| cg01948148 | 22.36  | 9.93  | 2.43E-02 | 24.20  | 32.33 | 4.54E-01 | -79.73  | 101.44 | 4.32E-01 | 23.64  | 10.79  | 2.84E-02 | 16.81  | 44.51 | 7.06E-01 |
| cg16080643 | -14.05 | 6.24  | 2.43E-02 | -26.20 | 15.50 | 9.09E-02 | -0.82   | 31.12  | 9.79E-01 | -13.71 | 7.43   | 6.52E-02 | -1.29  | 20.42 | 9.50E-01 |

|            |        |       |          |         |       |          |         |        |          |        |       |          |        |       |          |
|------------|--------|-------|----------|---------|-------|----------|---------|--------|----------|--------|-------|----------|--------|-------|----------|
| cg15787039 | 9.30   | 4.13  | 2.43E-02 | 10.40   | 5.85  | 7.57E-02 | 17.88   | 9.77   | 6.73E-02 | 6.58   | 12.93 | 6.11E-01 | 1.22   | 8.74  | 8.89E-01 |
| cg09255505 | 17.65  | 7.84  | 2.43E-02 | 16.53   | 16.49 | 3.16E-01 | 1.55    | 19.34  | 9.36E-01 | 23.20  | 11.05 | 3.58E-02 | 18.69  | 23.91 | 4.35E-01 |
| cg00988708 | 11.73  | 5.21  | 2.43E-02 | 6.00    | 11.46 | 6.01E-01 | 3.84    | 17.93  | 8.31E-01 | 12.10  | 6.58  | 6.60E-02 | 31.42  | 18.14 | 8.32E-02 |
| cg10077746 | 11.42  | 5.07  | 2.43E-02 | 12.58   | 6.29  | 4.57E-02 | 3.73    | 15.83  | 8.14E-01 | 39.62  | 18.09 | 2.85E-02 | 4.92   | 8.61  | 5.68E-01 |
| cg04014685 | -11.57 | 5.14  | 2.43E-02 | -19.93  | 10.15 | 4.97E-02 | -6.81   | 14.87  | 6.47E-01 | -11.40 | 7.47  | 1.27E-01 | -1.72  | 13.22 | 8.96E-01 |
| cg23972271 | 10.32  | 4.58  | 2.43E-02 | 13.61   | 9.72  | 1.61E-01 | 11.55   | 20.41  | 5.71E-01 | 11.33  | 5.85  | 5.30E-02 | -1.92  | 13.49 | 8.87E-01 |
| cg13413488 | -17.09 | 7.59  | 2.43E-02 | -26.25  | 11.59 | 2.36E-02 | 2.50    | 18.71  | 8.94E-01 | -32.24 | 21.73 | 1.38E-01 | -8.17  | 14.20 | 5.65E-01 |
| cg04278197 | -9.62  | 4.27  | 2.43E-02 | -12.02  | 13.24 | 3.64E-01 | 0.03    | 23.91  | 9.99E-01 | -10.17 | 4.79  | 3.38E-02 | -4.23  | 16.02 | 7.92E-01 |
| cg10861599 | 16.34  | 7.25  | 2.43E-02 | 9.56    | 9.12  | 2.95E-01 | 35.39   | 20.77  | 8.84E-02 | 26.31  | 27.33 | 3.36E-01 | 23.54  | 17.32 | 1.74E-01 |
| cg27548595 | 19.57  | 8.69  | 2.43E-02 | 13.28   | 14.90 | 3.73E-01 | 12.81   | 17.25  | 4.58E-01 | 33.23  | 16.48 | 4.37E-02 | 19.98  | 24.22 | 4.09E-01 |
| cg09282946 | 11.08  | 4.92  | 2.43E-02 | 8.20    | 6.97  | 2.39E-01 | 11.76   | 9.49   | 2.15E-01 | 33.54  | 17.58 | 5.64E-02 | 7.82   | 12.53 | 5.33E-01 |
| cg08160072 | 6.22   | 2.76  | 2.43E-02 | 4.75    | 3.53  | 1.79E-01 | 10.39   | 6.92   | 1.33E-01 | 9.14   | 8.65  | 2.91E-01 | 5.73   | 7.75  | 4.60E-01 |
| cg09415148 | 14.83  | 6.58  | 2.43E-02 | 16.42   | 14.23 | 2.48E-01 | -13.56  | 24.02  | 5.72E-01 | 17.54  | 8.63  | 4.21E-02 | 16.45  | 18.32 | 3.69E-01 |
| cg19714940 | 26.50  | 11.77 | 2.43E-02 | 50.03   | 31.44 | 1.12E-01 | 157.83  | 201.52 | 4.34E-01 | 20.61  | 13.16 | 1.17E-01 | 43.54  | 49.31 | 3.77E-01 |
| cg04628008 | -27.84 | 12.36 | 2.43E-02 | -29.48  | 40.88 | 4.71E-01 | -163.36 | 250.31 | 5.14E-01 | -26.90 | 13.47 | 4.57E-02 | -32.78 | 49.13 | 5.05E-01 |
| cg16179952 | 13.64  | 6.06  | 2.43E-02 | 24.44   | 8.99  | 6.55E-03 | 13.88   | 15.68  | 3.76E-01 | 16.40  | 7.90  | 3.80E-02 | -3.72  | 10.47 | 7.22E-01 |
| cg06710785 | -9.04  | 4.01  | 2.43E-02 | -8.62   | 8.64  | 3.19E-01 | -3.82   | 12.23  | 7.55E-01 | -9.27  | 5.32  | 8.12E-02 | -13.93 | 12.28 | 2.57E-01 |
| cg11609001 | 18.25  | 8.10  | 2.43E-02 | 18.71   | 20.19 | 3.54E-01 | 37.81   | 36.21  | 2.96E-01 | 13.08  | 10.03 | 1.92E-01 | 35.25  | 21.93 | 1.08E-01 |
| cg13540312 | -26.13 | 11.60 | 2.43E-02 | -38.80  | 21.44 | 7.04E-02 | -20.33  | 54.85  | 7.11E-01 | -26.11 | 15.66 | 9.55E-02 | 4.08   | 34.38 | 9.06E-01 |
| cg22789976 | -9.65  | 4.28  | 2.43E-02 | -11.25  | 5.69  | 4.80E-02 | -11.51  | 10.71  | 2.82E-01 | 15.33  | 15.33 | 3.17E-01 | -13.45 | 9.70  | 1.65E-01 |
| cg09670128 | 14.24  | 6.32  | 2.43E-02 | 41.25   | 25.28 | 1.03E-01 | 81.82   | 62.89  | 1.93E-01 | 11.11  | 6.91  | 1.08E-01 | 16.97  | 21.02 | 4.20E-01 |
| cg02223962 | 10.28  | 4.57  | 2.43E-02 | -2.69   | 15.38 | 8.61E-01 | 1.19    | 22.30  | 9.58E-01 | 13.33  | 5.06  | 8.40E-03 | -7.05  | 19.41 | 7.16E-01 |
| cg01118730 | 18.88  | 8.38  | 2.43E-02 | 10.88   | 18.30 | 5.52E-01 | 55.78   | 38.68  | 1.49E-01 | 20.73  | 10.51 | 4.86E-02 | 7.36   | 25.65 | 7.74E-01 |
| cg21308322 | -16.51 | 7.33  | 2.43E-02 | -28.14  | 20.40 | 1.68E-01 | -0.68   | 27.86  | 9.81E-01 | -15.54 | 8.56  | 6.95E-02 | -20.97 | 28.07 | 4.55E-01 |
| cg12131510 | 12.86  | 5.71  | 2.43E-02 | 18.70   | 12.73 | 1.42E-01 | -3.96   | 13.08  | 7.62E-01 | 15.49  | 7.53  | 3.97E-02 | 28.52  | 31.38 | 3.63E-01 |
| cg24787335 | 9.44   | 4.19  | 2.43E-02 | 8.24    | 6.36  | 1.95E-01 | 17.87   | 8.12   | 2.78E-02 | -1.22  | 13.70 | 9.29E-01 | 5.92   | 9.26  | 5.23E-01 |
| cg08299783 | -8.55  | 3.80  | 2.44E-02 | -10.45  | 6.27  | 9.55E-02 | -16.58  | 8.26   | 4.48E-02 | -2.51  | 7.58  | 7.40E-01 | -3.42  | 9.17  | 7.10E-01 |
| cg16555505 | -10.61 | 4.71  | 2.44E-02 | -13.83  | 8.28  | 9.49E-02 | -3.73   | 14.22  | 7.93E-01 | -15.36 | 7.75  | 4.74E-02 | -0.22  | 10.61 | 9.83E-01 |
| cg11884093 | -82.20 | 36.51 | 2.44E-02 | -149.68 | 54.67 | 6.18E-03 | -382.40 | 270.11 | 1.57E-01 | -67.02 | 28.54 | 1.89E-02 | 6.40   | 73.61 | 9.31E-01 |
| cg25656096 | -20.89 | 9.28  | 2.44E-02 | -2.90   | 26.02 | 9.11E-01 | -11.00  | 55.21  | 8.42E-01 | -27.42 | 10.42 | 8.50E-03 | 29.44  | 40.70 | 4.70E-01 |
| cg13696132 | 32.92  | 14.62 | 2.44E-02 | 51.20   | 35.65 | 1.51E-01 | 25.24   | 56.75  | 6.57E-01 | 31.37  | 18.82 | 9.55E-02 | 22.83  | 36.33 | 5.30E-01 |
| cg05889881 | 15.37  | 6.83  | 2.44E-02 | 15.22   | 11.54 | 1.87E-01 | 20.83   | 11.56  | 7.16E-02 | 0.89   | 17.65 | 9.60E-01 | 17.48  | 17.55 | 3.19E-01 |
| cg03078672 | 16.48  | 7.32  | 2.44E-02 | 33.96   | 15.97 | 3.35E-02 | 18.66   | 15.15  | 2.18E-01 | 3.99   | 10.95 | 7.16E-01 | 29.40  | 22.18 | 1.85E-01 |
| cg13096433 | -12.32 | 5.47  | 2.44E-02 | -13.09  | 15.43 | 3.96E-01 | 15.27   | 25.01  | 5.42E-01 | -12.77 | 6.25  | 4.10E-02 | -27.06 | 22.44 | 2.28E-01 |
| cg18990588 | -13.14 | 5.84  | 2.44E-02 | -25.18  | 9.23  | 6.36E-03 | -4.05   | 12.63  | 7.48E-01 | -10.97 | 16.79 | 5.13E-01 | -3.29  | 11.34 | 7.72E-01 |

|            |        |       |          |        |       |          |         |        |          |         |       |          |        |       |          |
|------------|--------|-------|----------|--------|-------|----------|---------|--------|----------|---------|-------|----------|--------|-------|----------|
| cg26671848 | -13.15 | 5.84  | 2.44E-02 | -24.58 | 9.45  | 9.27E-03 | 4.95    | 13.70  | 7.18E-01 | -9.15   | 7.70  | 2.35E-01 | -20.16 | 13.74 | 1.42E-01 |
| cg22954687 | 9.41   | 4.18  | 2.44E-02 | 11.89  | 5.35  | 2.63E-02 | 13.38   | 10.46  | 2.01E-01 | -8.07   | 18.35 | 6.60E-01 | 2.48   | 9.87  | 8.02E-01 |
| cg11957798 | -44.54 | 19.78 | 2.44E-02 | -44.72 | 27.44 | 1.03E-01 | 60.21   | 79.58  | 4.49E-01 | -50.15  | 43.49 | 2.49E-01 | -69.23 | 43.03 | 1.08E-01 |
| cg20600053 | -31.21 | 13.87 | 2.44E-02 | -8.86  | 22.16 | 6.89E-01 | -109.26 | 50.58  | 3.08E-02 | -35.47  | 21.01 | 9.14E-02 | -31.62 | 25.89 | 2.22E-01 |
| cg13934406 | -11.68 | 5.19  | 2.44E-02 | -14.30 | 6.82  | 3.61E-02 | -4.15   | 10.41  | 6.90E-01 | -35.35  | 15.50 | 2.26E-02 | -4.69  | 8.82  | 5.95E-01 |
| cg00388605 | -20.23 | 8.99  | 2.44E-02 | -24.58 | 14.92 | 9.96E-02 | 18.62   | 33.24  | 5.75E-01 | -14.68  | 14.93 | 3.26E-01 | -36.52 | 20.03 | 6.82E-02 |
| cg24324179 | 21.47  | 9.54  | 2.44E-02 | 47.59  | 22.47 | 3.41E-02 | -10.77  | 80.33  | 8.93E-01 | 15.59   | 11.25 | 1.66E-01 | 21.20  | 32.37 | 5.13E-01 |
| cg21638454 | -11.88 | 5.28  | 2.44E-02 | -8.75  | 15.52 | 5.73E-01 | -26.72  | 20.26  | 1.87E-01 | -10.21  | 6.10  | 9.38E-02 | -21.07 | 20.53 | 3.05E-01 |
| cg00545469 | -12.00 | 5.33  | 2.44E-02 | 3.35   | 15.40 | 8.28E-01 | 20.81   | 39.78  | 6.01E-01 | -15.45  | 6.03  | 1.04E-02 | -8.70  | 18.85 | 6.44E-01 |
| cg10860578 | -17.73 | 7.88  | 2.44E-02 | -17.01 | 13.43 | 2.05E-01 | -4.69   | 19.67  | 8.12E-01 | -20.78  | 14.99 | 1.66E-01 | -24.56 | 16.82 | 1.44E-01 |
| cg06852305 | 13.30  | 5.91  | 2.44E-02 | 7.65   | 17.61 | 6.64E-01 | 33.51   | 26.23  | 2.01E-01 | 14.05   | 6.63  | 3.42E-02 | -9.78  | 28.64 | 7.33E-01 |
| cg03476195 | 11.22  | 4.99  | 2.44E-02 | 15.45  | 7.59  | 4.17E-02 | 2.33    | 10.47  | 8.24E-01 | 32.91   | 19.87 | 9.78E-02 | 7.00   | 9.45  | 4.59E-01 |
| cg19516647 | 26.83  | 11.92 | 2.44E-02 | -7.47  | 37.92 | 8.44E-01 | 15.31   | 157.00 | 9.22E-01 | 34.07   | 13.35 | 1.07E-02 | 3.04   | 38.20 | 9.37E-01 |
| cg10496619 | -15.42 | 6.85  | 2.44E-02 | -15.03 | 21.16 | 4.78E-01 | -60.44  | 29.16  | 3.82E-02 | -11.71  | 7.69  | 1.28E-01 | -25.94 | 31.53 | 4.11E-01 |
| cg14224196 | -59.93 | 26.63 | 2.44E-02 | 3.26   | 47.72 | 9.46E-01 | 24.33   | 177.07 | 8.91E-01 | -108.44 | 41.16 | 8.42E-03 | -65.77 | 40.36 | 1.03E-01 |
| cg18026235 | -15.92 | 7.08  | 2.44E-02 | -25.62 | 12.82 | 4.56E-02 | -15.69  | 15.58  | 3.14E-01 | -6.15   | 12.63 | 6.26E-01 | -16.83 | 16.90 | 3.19E-01 |
| cg26406924 | -8.62  | 3.83  | 2.44E-02 | -15.73 | 9.30  | 9.09E-02 | 1.78    | 14.03  | 8.99E-01 | -9.93   | 4.91  | 4.29E-02 | -0.20  | 10.03 | 9.84E-01 |
| cg04374719 | -7.89  | 3.51  | 2.44E-02 | -13.28 | 7.40  | 7.27E-02 | -10.11  | 13.93  | 4.68E-01 | -5.31   | 4.48  | 2.36E-01 | -10.16 | 11.08 | 3.59E-01 |
| cg02891314 | -2.02  | 0.90  | 2.44E-02 | -3.00  | 1.20  | 1.27E-02 | -1.00   | 1.96   | 6.09E-01 | -3.83   | 2.46  | 1.20E-01 | 0.59   | 1.98  | 7.67E-01 |
| cg23172080 | -11.90 | 5.29  | 2.44E-02 | -16.03 | 11.65 | 1.69E-01 | 1.92    | 22.69  | 9.33E-01 | -7.63   | 5.65  | 1.77E-01 | -33.86 | 14.76 | 2.18E-02 |
| cg07123890 | 15.77  | 7.01  | 2.44E-02 | 1.51   | 20.76 | 9.42E-01 | -13.15  | 28.07  | 6.39E-01 | 18.86   | 8.09  | 1.97E-02 | 30.85  | 25.87 | 2.33E-01 |
| cg10091408 | -8.34  | 3.71  | 2.44E-02 | -13.30 | 5.46  | 1.48E-02 | -1.68   | 8.17   | 8.37E-01 | -11.47  | 10.41 | 2.71E-01 | -1.97  | 8.16  | 8.09E-01 |
| cg07482373 | 14.27  | 6.34  | 2.44E-02 | 15.70  | 16.89 | 3.53E-01 | 80.43   | 66.31  | 2.25E-01 | 16.24   | 7.21  | 2.42E-02 | -16.59 | 23.06 | 4.72E-01 |
| cg26608667 | 8.75   | 3.89  | 2.44E-02 | 7.70   | 5.55  | 1.65E-01 | 21.81   | 9.18   | 1.75E-02 | 3.41    | 8.40  | 6.85E-01 | 2.81   | 11.50 | 8.07E-01 |
| cg16503618 | 24.62  | 10.94 | 2.44E-02 | 26.25  | 23.48 | 2.64E-01 | -15.89  | 107.16 | 8.82E-01 | 24.81   | 13.42 | 6.44E-02 | 24.05  | 33.37 | 4.71E-01 |
| cg09577455 | 9.78   | 4.35  | 2.44E-02 | 12.88  | 5.63  | 2.23E-02 | 12.11   | 10.21  | 2.35E-01 | 1.58    | 16.50 | 9.24E-01 | -1.26  | 11.09 | 9.10E-01 |
| cg24122751 | 19.37  | 8.61  | 2.44E-02 | 47.45  | 20.54 | 2.09E-02 | 10.45   | 20.63  | 6.13E-01 | 10.48   | 11.55 | 3.64E-01 | 35.68  | 27.89 | 2.01E-01 |
| cg10575219 | 9.42   | 4.19  | 2.44E-02 | 10.97  | 5.69  | 5.37E-02 | 21.33   | 11.67  | 6.76E-02 | 1.26    | 11.54 | 9.13E-01 | 2.86   | 9.39  | 7.61E-01 |
| cg08783317 | -7.39  | 3.28  | 2.44E-02 | -5.60  | 5.84  | 3.38E-01 | -15.76  | 7.61   | 3.83E-02 | -8.81   | 5.09  | 8.36E-02 | 4.53   | 9.06  | 6.17E-01 |
| cg21227784 | -12.21 | 5.42  | 2.44E-02 | -9.54  | 13.32 | 4.74E-01 | -5.91   | 21.58  | 7.84E-01 | -11.73  | 6.68  | 7.89E-02 | -22.58 | 16.29 | 1.66E-01 |
| cg24851370 | 32.70  | 14.53 | 2.44E-02 | 28.28  | 20.29 | 1.63E-01 | 71.53   | 61.76  | 2.47E-01 | 22.63   | 45.62 | 6.20E-01 | 36.16  | 25.30 | 1.53E-01 |
| cg17932631 | -32.69 | 14.53 | 2.45E-02 | -33.56 | 19.70 | 8.84E-02 | -28.93  | 36.36  | 4.26E-01 | -42.18  | 52.05 | 4.18E-01 | -29.89 | 31.10 | 3.37E-01 |
| cg06212607 | 43.81  | 19.47 | 2.45E-02 | 27.66  | 16.95 | 1.03E-01 | 174.40  | 64.14  | 6.55E-03 | 8.15    | 78.65 | 9.17E-01 | 40.55  | 18.92 | 3.20E-02 |
| cg25361447 | 49.90  | 22.18 | 2.45E-02 | 23.44  | 19.19 | 2.22E-01 | 175.64  | 66.52  | 8.28E-03 | 48.10   | 43.44 | 2.68E-01 | 49.25  | 30.23 | 1.03E-01 |
| cg22054362 | 8.89   | 3.95  | 2.45E-02 | 19.77  | 16.62 | 2.34E-01 | 6.80    | 58.07  | 9.07E-01 | 10.04   | 4.39  | 2.22E-02 | -3.06  | 11.02 | 7.81E-01 |

|            |        |       |          |        |       |          |         |        |          |        |       |          |        |       |          |
|------------|--------|-------|----------|--------|-------|----------|---------|--------|----------|--------|-------|----------|--------|-------|----------|
| cg22801149 | 7.90   | 3.51  | 2.45E-02 | 12.46  | 4.91  | 1.12E-02 | 6.20    | 7.95   | 4.36E-01 | -1.86  | 8.43  | 8.26E-01 | 5.38   | 10.08 | 5.94E-01 |
| cg13185218 | 8.74   | 3.88  | 2.45E-02 | 7.21   | 8.73  | 4.09E-01 | 13.10   | 12.63  | 3.00E-01 | 9.86   | 4.93  | 4.56E-02 | -0.48  | 13.13 | 9.71E-01 |
| cg03572260 | 7.14   | 3.18  | 2.45E-02 | 9.22   | 4.92  | 6.07E-02 | 9.30    | 7.90   | 2.39E-01 | 5.99   | 5.66  | 2.90E-01 | -0.89  | 9.75  | 9.27E-01 |
| cg23875758 | 18.89  | 8.40  | 2.45E-02 | 15.82  | 13.62 | 2.46E-01 | 37.14   | 15.63  | 1.75E-02 | -4.56  | 18.76 | 8.08E-01 | 23.28  | 22.70 | 3.05E-01 |
| cg22787468 | 10.45  | 4.65  | 2.45E-02 | 18.11  | 7.84  | 2.09E-02 | 15.99   | 10.84  | 1.40E-01 | 1.78   | 7.86  | 8.21E-01 | 4.59   | 13.67 | 7.37E-01 |
| cg13185413 | 3.20   | 1.42  | 2.45E-02 | 2.41   | 2.08  | 2.46E-01 | 4.79    | 2.85   | 9.37E-02 | 4.51   | 4.13  | 2.75E-01 | 2.12   | 3.54  | 5.49E-01 |
| cg13639602 | 10.54  | 4.69  | 2.45E-02 | 11.58  | 6.48  | 7.38E-02 | 10.03   | 11.48  | 3.83E-01 | 11.62  | 11.53 | 3.13E-01 | 6.15   | 12.30 | 6.17E-01 |
| cg12974388 | 19.07  | 8.48  | 2.45E-02 | 59.99  | 36.51 | 1.00E-01 | 104.53  | 109.76 | 3.41E-01 | 18.55  | 9.13  | 4.21E-02 | -10.34 | 30.51 | 7.35E-01 |
| cg08645257 | 13.10  | 5.82  | 2.45E-02 | 19.39  | 8.69  | 2.56E-02 | 14.03   | 29.32  | 6.32E-01 | 26.00  | 22.92 | 2.56E-01 | 4.83   | 8.71  | 5.79E-01 |
| cg26837399 | 6.00   | 2.67  | 2.45E-02 | 3.80   | 3.33  | 2.54E-01 | 15.27   | 7.33   | 3.71E-02 | 9.86   | 8.69  | 2.56E-01 | 4.63   | 7.35  | 5.29E-01 |
| cg24974217 | -14.52 | 6.46  | 2.45E-02 | -18.59 | 10.25 | 6.97E-02 | -22.07  | 15.05  | 1.43E-01 | 4.01   | 15.82 | 8.00E-01 | -14.86 | 12.85 | 2.48E-01 |
| cg18705067 | 67.93  | 30.20 | 2.45E-02 | 41.54  | 41.87 | 3.21E-01 | 25.58   | 147.45 | 8.62E-01 | 59.25  | 72.73 | 4.15E-01 | 131.96 | 58.61 | 2.44E-02 |
| cg12013685 | -8.64  | 3.84  | 2.45E-02 | -15.18 | 5.73  | 8.11E-03 | -6.42   | 8.26   | 4.37E-01 | -1.27  | 12.99 | 9.22E-01 | -1.32  | 7.72  | 8.64E-01 |
| cg27498197 | -10.82 | 4.81  | 2.45E-02 | -16.87 | 13.10 | 1.98E-01 | 0.65    | 18.10  | 9.72E-01 | -12.01 | 5.66  | 3.39E-02 | 0.99   | 17.73 | 9.56E-01 |
| cg25341925 | -10.76 | 4.78  | 2.45E-02 | -2.76  | 12.04 | 8.19E-01 | -10.41  | 17.68  | 5.56E-01 | -11.81 | 5.87  | 4.42E-02 | -16.39 | 14.79 | 2.68E-01 |
| cg11843333 | -13.45 | 5.98  | 2.45E-02 | -20.50 | 16.83 | 2.23E-01 | 10.95   | 30.74  | 7.22E-01 | -11.71 | 6.89  | 8.90E-02 | -29.81 | 20.87 | 1.53E-01 |
| cg01882930 | -12.42 | 5.52  | 2.45E-02 | -18.87 | 9.53  | 4.76E-02 | -14.47  | 12.10  | 2.32E-01 | 5.41   | 14.32 | 7.05E-01 | -12.62 | 9.97  | 2.06E-01 |
| cg26391564 | -6.14  | 2.73  | 2.45E-02 | -5.65  | 3.91  | 1.49E-01 | -12.23  | 5.37   | 2.27E-02 | -2.59  | 13.22 | 8.45E-01 | -0.57  | 5.90  | 9.23E-01 |
| cg22388347 | -10.43 | 4.64  | 2.45E-02 | -11.79 | 9.08  | 1.94E-01 | -10.22  | 13.17  | 4.38E-01 | -4.20  | 6.92  | 5.44E-01 | -25.37 | 11.40 | 2.60E-02 |
| cg13096128 | 13.36  | 5.94  | 2.45E-02 | 26.34  | 13.55 | 5.19E-02 | 35.06   | 27.23  | 1.98E-01 | 9.67   | 7.05  | 1.70E-01 | -4.75  | 26.52 | 8.58E-01 |
| cg25554998 | 17.13  | 7.62  | 2.45E-02 | 4.62   | 15.41 | 7.64E-01 | 22.61   | 15.46  | 1.44E-01 | 17.44  | 12.39 | 1.59E-01 | 29.00  | 20.71 | 1.61E-01 |
| cg14436426 | 11.83  | 5.26  | 2.45E-02 | 17.33  | 7.95  | 2.92E-02 | 18.22   | 10.57  | 8.48E-02 | -4.68  | 12.53 | 7.09E-01 | 3.98   | 14.19 | 7.79E-01 |
| cg09308801 | 19.61  | 8.72  | 2.45E-02 | 27.91  | 17.65 | 1.14E-01 | 23.44   | 18.37  | 2.02E-01 | 20.79  | 13.79 | 1.32E-01 | -6.10  | 24.13 | 8.00E-01 |
| cg11121252 | 21.15  | 9.41  | 2.45E-02 | 19.70  | 13.97 | 1.58E-01 | 7.72    | 25.29  | 7.60E-01 | 42.60  | 24.62 | 8.36E-02 | 18.81  | 18.37 | 3.06E-01 |
| cg08475042 | -11.03 | 4.90  | 2.45E-02 | -18.95 | 13.41 | 1.58E-01 | 8.80    | 21.47  | 6.82E-01 | -10.46 | 5.67  | 6.52E-02 | -16.91 | 18.88 | 3.71E-01 |
| cg09039685 | -5.06  | 2.25  | 2.45E-02 | -6.92  | 3.80  | 6.82E-02 | -0.39   | 5.22   | 9.40E-01 | -7.17  | 4.34  | 9.86E-02 | -3.24  | 5.12  | 5.26E-01 |
| cg26681097 | -9.28  | 4.13  | 2.45E-02 | -15.98 | 10.06 | 1.12E-01 | -18.46  | 18.81  | 3.26E-01 | -5.43  | 5.08  | 2.85E-01 | -17.23 | 11.77 | 1.43E-01 |
| cg03557391 | 32.46  | 14.43 | 2.45E-02 | 27.22  | 17.47 | 1.19E-01 | -3.04   | 52.79  | 9.54E-01 | 100.85 | 45.07 | 2.53E-02 | 26.85  | 38.59 | 4.87E-01 |
| cg12800270 | 25.71  | 11.44 | 2.45E-02 | 51.70  | 18.06 | 4.20E-03 | 17.03   | 18.17  | 3.49E-01 | 3.95   | 16.46 | 8.10E-01 | 38.46  | 26.40 | 1.45E-01 |
| cg10782297 | 48.15  | 21.41 | 2.45E-02 | 16.50  | 54.56 | 7.62E-01 | -174.24 | 267.20 | 5.14E-01 | 50.81  | 25.42 | 4.56E-02 | 82.16  | 59.42 | 1.67E-01 |
| cg13931134 | -11.32 | 5.04  | 2.45E-02 | -10.58 | 11.49 | 3.57E-01 | -24.30  | 14.35  | 9.05E-02 | -8.74  | 6.85  | 2.02E-01 | -10.93 | 13.24 | 4.09E-01 |
| cg23043389 | 9.38   | 4.17  | 2.45E-02 | 1.40   | 6.38  | 8.26E-01 | 14.83   | 8.63   | 8.57E-02 | 16.10  | 14.49 | 2.67E-01 | 15.52  | 8.24  | 5.95E-02 |
| cg23716690 | -9.16  | 4.07  | 2.46E-02 | -11.12 | 7.59  | 1.43E-01 | -17.66  | 11.01  | 1.09E-01 | -4.30  | 6.06  | 4.78E-01 | -12.94 | 11.59 | 2.64E-01 |
| cg04667664 | 22.43  | 9.98  | 2.46E-02 | 18.48  | 16.01 | 2.49E-01 | 1.97    | 16.62  | 9.06E-01 | 26.93  | 17.50 | 1.24E-01 | 54.72  | 21.99 | 1.28E-02 |
| cg24321030 | -40.78 | 18.14 | 2.46E-02 | -94.57 | 54.60 | 8.32E-02 | -243.00 | 163.59 | 1.37E-01 | -32.95 | 20.66 | 1.11E-01 | -18.30 | 55.68 | 7.42E-01 |



|            |        |       |          |        |       |          |         |        |          |        |       |          |        |       |          |
|------------|--------|-------|----------|--------|-------|----------|---------|--------|----------|--------|-------|----------|--------|-------|----------|
| cg06177555 | 7.85   | 3.49  | 2.46E-02 | 6.86   | 4.76  | 1.49E-01 | 11.53   | 7.31   | 1.14E-01 | 20.72  | 11.06 | 6.09E-02 | -2.61  | 8.91  | 7.69E-01 |
| cg04174777 | -11.20 | 4.98  | 2.46E-02 | -0.95  | 12.96 | 9.42E-01 | 4.10    | 17.27  | 8.12E-01 | -13.09 | 6.07  | 3.11E-02 | -26.80 | 16.00 | 9.39E-02 |
| cg11854259 | 21.62  | 9.62  | 2.46E-02 | 38.45  | 14.17 | 6.64E-03 | 2.50    | 26.95  | 9.26E-01 | 2.02   | 27.79 | 9.42E-01 | 11.43  | 17.81 | 5.21E-01 |
| cg07211972 | 5.00   | 2.23  | 2.46E-02 | 2.76   | 2.71  | 3.09E-01 | 10.53   | 4.59   | 2.17E-02 | 9.12   | 5.46  | 9.53E-02 | 0.15   | 5.78  | 9.79E-01 |
| cg27220062 | -8.11  | 3.61  | 2.46E-02 | -5.30  | 5.27  | 3.15E-01 | -16.48  | 8.80   | 6.12E-02 | -2.93  | 8.60  | 7.33E-01 | -12.52 | 8.35  | 1.34E-01 |
| cg08477744 | 20.50  | 9.12  | 2.46E-02 | 26.50  | 20.47 | 1.95E-01 | 13.95   | 18.92  | 4.61E-01 | 22.00  | 13.56 | 1.05E-01 | 17.52  | 26.64 | 5.11E-01 |
| cg26183708 | -17.79 | 7.92  | 2.46E-02 | -25.92 | 11.34 | 2.23E-02 | -0.38   | 32.08  | 9.91E-01 | 5.38   | 22.29 | 8.09E-01 | -17.87 | 13.86 | 1.98E-01 |
| cg18081338 | 14.61  | 6.50  | 2.46E-02 | 6.14   | 13.68 | 6.54E-01 | 17.12   | 24.55  | 4.86E-01 | 11.76  | 8.56  | 1.70E-01 | 40.84  | 18.12 | 2.42E-02 |
| cg25832824 | 15.67  | 6.97  | 2.46E-02 | 0.00   | 29.27 | 1.00E+00 | 74.51   | 114.61 | 5.16E-01 | 16.04  | 7.41  | 3.05E-02 | 21.94  | 29.64 | 4.59E-01 |
| cg22106273 | -8.90  | 3.96  | 2.46E-02 | 0.74   | 5.15  | 8.86E-01 | -12.60  | 7.54   | 9.48E-02 | -12.58 | 5.38  | 1.94E-02 | -15.00 | 7.52  | 4.60E-02 |
| cg22374742 | -8.19  | 3.64  | 2.46E-02 | -11.59 | 5.17  | 2.49E-02 | 2.09    | 10.84  | 8.47E-01 | -6.01  | 12.08 | 6.19E-01 | -7.07  | 6.66  | 2.88E-01 |
| cg02138331 | 5.70   | 2.54  | 2.46E-02 | 6.40   | 4.09  | 1.17E-01 | 8.68    | 7.03   | 2.17E-01 | 5.66   | 4.13  | 1.71E-01 | -0.33  | 7.80  | 9.66E-01 |
| cg12723425 | 12.17  | 5.41  | 2.46E-02 | 11.63  | 7.53  | 1.23E-01 | 14.97   | 11.24  | 1.83E-01 | 21.24  | 14.92 | 1.55E-01 | -0.91  | 15.63 | 9.54E-01 |
| cg16589135 | -19.89 | 8.85  | 2.46E-02 | -8.78  | 30.90 | 7.76E-01 | -135.15 | 102.90 | 1.89E-01 | -22.07 | 9.71  | 2.30E-02 | 1.94   | 31.25 | 9.50E-01 |
| cg01157404 | 17.78  | 7.91  | 2.46E-02 | 24.08  | 11.97 | 4.42E-02 | 11.08   | 15.82  | 4.84E-01 | 31.81  | 31.73 | 3.16E-01 | 10.01  | 15.78 | 5.26E-01 |
| cg00421541 | -6.69  | 2.98  | 2.46E-02 | -8.45  | 5.39  | 1.17E-01 | -5.93   | 7.12   | 4.05E-01 | -9.69  | 4.81  | 4.40E-02 | 4.66   | 8.06  | 5.63E-01 |
| cg21286402 | 19.86  | 8.84  | 2.46E-02 | 18.15  | 20.67 | 3.80E-01 | 31.66   | 29.93  | 2.90E-01 | 24.72  | 12.53 | 4.85E-02 | 6.39   | 18.32 | 7.27E-01 |
| cg05664833 | -12.01 | 5.35  | 2.46E-02 | -13.03 | 11.36 | 2.51E-01 | -6.06   | 12.71  | 6.33E-01 | -12.45 | 8.09  | 1.24E-01 | -15.86 | 13.13 | 2.27E-01 |
| cg13298167 | -11.12 | 4.95  | 2.46E-02 | -17.01 | 9.37  | 6.95E-02 | -12.22  | 14.81  | 4.09E-01 | -7.76  | 7.27  | 2.86E-01 | -9.69  | 12.92 | 4.53E-01 |
| cg13972054 | 27.80  | 12.37 | 2.46E-02 | 26.11  | 15.81 | 9.87E-02 | -26.92  | 72.12  | 7.09E-01 | 122.04 | 64.45 | 5.83E-02 | 25.23  | 21.80 | 2.47E-01 |
| cg22967329 | 44.06  | 19.60 | 2.46E-02 | 81.60  | 54.90 | 1.37E-01 | -203.80 | 205.59 | 3.22E-01 | 43.55  | 22.69 | 5.49E-02 | 25.57  | 57.38 | 6.56E-01 |
| cg09155881 | -13.38 | 5.96  | 2.46E-02 | -23.17 | 9.69  | 1.67E-02 | -7.31   | 13.66  | 5.93E-01 | -1.52  | 13.58 | 9.11E-01 | -12.27 | 12.16 | 3.13E-01 |
| cg27081230 | -11.43 | 5.09  | 2.46E-02 | -12.21 | 7.69  | 1.12E-01 | 2.52    | 13.09  | 8.47E-01 | -4.97  | 12.45 | 6.90E-01 | -23.02 | 10.27 | 2.51E-02 |
| cg01317029 | 13.64  | 6.07  | 2.46E-02 | 9.46   | 8.51  | 2.67E-01 | 31.95   | 14.04  | 2.29E-02 | 1.61   | 18.09 | 9.29E-01 | 13.95  | 13.84 | 3.13E-01 |
| cg00972603 | 25.69  | 11.43 | 2.46E-02 | 68.80  | 32.51 | 3.43E-02 | 8.79    | 100.54 | 9.30E-01 | 25.27  | 14.70 | 8.57E-02 | 6.95   | 22.46 | 7.57E-01 |
| cg13497903 | 9.57   | 4.26  | 2.46E-02 | 8.36   | 6.48  | 1.97E-01 | 7.43    | 8.15   | 3.62E-01 | 3.46   | 13.95 | 8.04E-01 | 17.90  | 9.49  | 5.92E-02 |
| cg25311807 | 16.50  | 7.34  | 2.46E-02 | 36.05  | 19.24 | 6.09E-02 | 22.38   | 22.44  | 3.18E-01 | 8.58   | 8.99  | 3.40E-01 | 38.88  | 25.89 | 1.33E-01 |
| cg19702397 | 16.56  | 7.37  | 2.46E-02 | 16.43  | 15.99 | 3.04E-01 | -4.54   | 27.99  | 8.71E-01 | 22.02  | 9.30  | 1.79E-02 | -4.94  | 24.56 | 8.40E-01 |
| cg12396999 | -49.15 | 21.87 | 2.46E-02 | -41.01 | 27.90 | 1.42E-01 | -47.58  | 75.98  | 5.31E-01 | -46.12 | 86.18 | 5.93E-01 | -71.55 | 44.82 | 1.10E-01 |
| cg08955754 | -38.78 | 17.26 | 2.46E-02 | -39.27 | 21.82 | 7.19E-02 | -56.18  | 47.73  | 2.39E-01 | -10.08 | 80.48 | 9.00E-01 | -32.41 | 38.80 | 4.04E-01 |
| cg07187280 | 27.07  | 12.05 | 2.46E-02 | 24.25  | 21.47 | 2.59E-01 | -5.39   | 76.58  | 9.44E-01 | 28.43  | 16.09 | 7.72E-02 | 36.41  | 38.20 | 3.40E-01 |
| cg09313745 | -44.21 | 19.67 | 2.46E-02 | -50.60 | 24.74 | 4.08E-02 | 110.00  | 91.12  | 2.27E-01 | -68.67 | 48.89 | 1.60E-01 | -43.63 | 37.30 | 2.42E-01 |
| cg02675896 | -37.14 | 16.53 | 2.46E-02 | -32.37 | 56.33 | 5.66E-01 | 54.11   | 238.49 | 8.21E-01 | -41.71 | 18.09 | 2.11E-02 | 2.72   | 60.63 | 9.64E-01 |
| cg18303410 | -12.38 | 5.51  | 2.46E-02 | -21.03 | 8.84  | 1.74E-02 | -5.71   | 11.37  | 6.15E-01 | -3.34  | 6.34  | 5.99E-01 | -24.40 | 10.64 | 2.19E-02 |
| cg05332152 | 16.05  | 7.14  | 2.47E-02 | 18.28  | 12.64 | 1.48E-01 | 21.84   | 17.00  | 1.99E-01 | 6.32   | 11.56 | 5.85E-01 | 32.26  | 20.43 | 1.14E-01 |

|            |        |       |          |        |       |          |         |        |          |        |       |          |        |       |          |
|------------|--------|-------|----------|--------|-------|----------|---------|--------|----------|--------|-------|----------|--------|-------|----------|
| cg26499363 | 19.76  | 8.79  | 2.47E-02 | 17.26  | 12.34 | 1.62E-01 | 18.29   | 24.84  | 4.62E-01 | 49.18  | 26.00 | 5.85E-02 | 12.16  | 17.51 | 4.87E-01 |
| cg05815920 | 27.26  | 12.13 | 2.47E-02 | 30.48  | 36.40 | 4.02E-01 | -68.87  | 130.82 | 5.99E-01 | 33.12  | 13.11 | 1.15E-02 | -49.02 | 50.67 | 3.33E-01 |
| cg05424782 | 19.83  | 8.83  | 2.47E-02 | 30.09  | 13.14 | 2.21E-02 | 42.39   | 22.54  | 6.00E-02 | 8.00   | 52.94 | 8.80E-01 | 4.53   | 11.94 | 7.04E-01 |
| cg24626312 | 13.10  | 5.83  | 2.47E-02 | 25.33  | 13.98 | 7.01E-02 | 17.67   | 46.34  | 7.03E-01 | 11.53  | 6.77  | 8.84E-02 | -2.09  | 22.33 | 9.26E-01 |
| cg07460919 | 12.57  | 5.60  | 2.47E-02 | 15.42  | 8.64  | 7.42E-02 | 19.82   | 16.54  | 2.31E-01 | 13.56  | 10.45 | 1.95E-01 | -0.33  | 13.23 | 9.80E-01 |
| cg04583232 | 15.67  | 6.98  | 2.47E-02 | 26.30  | 10.19 | 9.86E-03 | 13.82   | 18.86  | 4.64E-01 | 18.64  | 11.59 | 1.08E-01 | -6.30  | 14.35 | 6.61E-01 |
| cg20313392 | 27.19  | 12.10 | 2.47E-02 | 18.54  | 42.06 | 6.59E-01 | 7.70    | 175.66 | 9.65E-01 | 30.20  | 13.17 | 2.19E-02 | 1.76   | 46.35 | 9.70E-01 |
| cg01823120 | -11.35 | 5.05  | 2.47E-02 | -26.96 | 10.91 | 1.35E-02 | -5.11   | 11.47  | 6.56E-01 | -9.59  | 7.27  | 1.87E-01 | 0.55   | 15.40 | 9.71E-01 |
| cg08872494 | -24.94 | 11.10 | 2.47E-02 | -20.96 | 14.28 | 1.42E-01 | -178.68 | 149.45 | 2.32E-01 | -40.77 | 23.92 | 8.83E-02 | -14.34 | 26.53 | 5.89E-01 |
| cg13222081 | -24.83 | 11.05 | 2.47E-02 | -33.18 | 13.42 | 1.34E-02 | -42.32  | 66.22  | 5.23E-01 | 22.36  | 59.05 | 7.05E-01 | -7.42  | 21.75 | 7.33E-01 |
| cg08101375 | 21.71  | 9.67  | 2.47E-02 | 47.39  | 25.79 | 6.61E-02 | 28.45   | 51.62  | 5.82E-01 | 22.58  | 12.99 | 8.20E-02 | 5.72   | 18.59 | 7.58E-01 |
| cg16298867 | 4.14   | 1.84  | 2.47E-02 | 1.39   | 2.50  | 5.79E-01 | 8.22    | 3.65   | 2.45E-02 | 7.72   | 8.65  | 3.72E-01 | 6.05   | 4.67  | 1.95E-01 |
| cg27645498 | 19.63  | 8.74  | 2.47E-02 | 34.92  | 13.43 | 9.32E-03 | -1.63   | 15.73  | 9.18E-01 | 15.54  | 17.09 | 3.63E-01 | 29.19  | 23.24 | 2.09E-01 |
| cg12470092 | -10.97 | 4.88  | 2.47E-02 | -17.12 | 7.35  | 1.99E-02 | -4.40   | 11.81  | 7.09E-01 | -4.59  | 14.91 | 7.58E-01 | -7.75  | 9.23  | 4.01E-01 |
| cg03381996 | -53.86 | 23.98 | 2.47E-02 | -75.63 | 57.32 | 1.87E-01 | -238.01 | 284.47 | 4.03E-01 | -52.24 | 28.51 | 6.69E-02 | -17.84 | 72.24 | 8.05E-01 |
| cg05901765 | 7.73   | 3.44  | 2.47E-02 | 13.42  | 6.66  | 4.39E-02 | 10.27   | 6.99   | 1.42E-01 | 1.51   | 7.46  | 8.40E-01 | 4.82   | 6.53  | 4.61E-01 |
| cg26854234 | 33.23  | 14.79 | 2.47E-02 | 27.13  | 24.21 | 2.62E-01 | 79.58   | 72.14  | 2.70E-01 | 41.87  | 21.84 | 5.53E-02 | 4.32   | 41.72 | 9.17E-01 |
| cg09232269 | -9.66  | 4.30  | 2.47E-02 | -9.81  | 4.94  | 4.70E-02 | 0.43    | 7.15   | 9.52E-01 | -6.46  | 4.03  | 1.09E-01 | -25.04 | 7.30  | 5.98E-04 |
| cg05129597 | -8.78  | 3.91  | 2.47E-02 | -10.58 | 6.54  | 1.06E-01 | -16.67  | 7.97   | 3.66E-02 | 0.83   | 7.81  | 9.15E-01 | -7.92  | 10.02 | 4.29E-01 |
| cg10764541 | 32.29  | 14.38 | 2.47E-02 | 75.34  | 45.63 | 9.87E-02 | -165.09 | 165.39 | 3.18E-01 | 26.76  | 15.78 | 8.99E-02 | 61.29  | 57.43 | 2.86E-01 |
| cg10003262 | 7.30   | 3.25  | 2.47E-02 | 6.56   | 5.05  | 1.94E-01 | 9.80    | 7.14   | 1.70E-01 | 8.28   | 8.92  | 3.53E-01 | 5.91   | 6.56  | 3.68E-01 |
| cg16630482 | 11.15  | 4.97  | 2.47E-02 | 16.05  | 9.88  | 1.04E-01 | 15.15   | 11.60  | 1.92E-01 | 10.19  | 8.77  | 2.45E-01 | 4.34   | 10.05 | 6.66E-01 |
| cg06565220 | 21.82  | 9.71  | 2.47E-02 | 19.51  | 12.06 | 1.06E-01 | -4.25   | 44.65  | 9.24E-01 | -47.84 | 62.26 | 4.42E-01 | 37.65  | 18.37 | 4.04E-02 |
| cg13253199 | 18.28  | 8.14  | 2.47E-02 | 29.73  | 22.67 | 1.90E-01 | 27.94   | 30.40  | 3.58E-01 | 14.32  | 9.51  | 1.32E-01 | 29.11  | 31.40 | 3.54E-01 |
| cg06482019 | 26.44  | 11.77 | 2.47E-02 | 20.89  | 27.45 | 4.47E-01 | 74.67   | 66.76  | 2.63E-01 | 19.92  | 14.48 | 1.69E-01 | 57.36  | 33.46 | 8.65E-02 |
| cg06474646 | 29.87  | 13.30 | 2.47E-02 | -1.28  | 32.11 | 9.68E-01 | -43.18  | 115.24 | 7.08E-01 | 40.67  | 15.75 | 9.80E-03 | 16.23  | 41.67 | 6.97E-01 |
| cg14183865 | -8.63  | 3.84  | 2.47E-02 | -8.56  | 5.76  | 1.37E-01 | -4.35   | 8.28   | 6.00E-01 | -18.31 | 10.05 | 6.84E-02 | -6.24  | 8.76  | 4.77E-01 |
| cg06422947 | 9.51   | 4.23  | 2.47E-02 | 13.46  | 7.21  | 6.20E-02 | 8.75    | 10.54  | 4.07E-01 | 6.74   | 6.61  | 3.08E-01 | 8.28   | 14.63 | 5.71E-01 |
| cg15228694 | 5.28   | 2.35  | 2.47E-02 | 7.43   | 3.07  | 1.55E-02 | 2.89    | 5.84   | 6.21E-01 | 2.87   | 6.84  | 6.75E-01 | 0.88   | 6.41  | 8.91E-01 |
| cg23209976 | 13.08  | 5.82  | 2.47E-02 | 17.10  | 8.96  | 5.64E-02 | 23.34   | 13.71  | 8.86E-02 | 20.11  | 16.59 | 2.25E-01 | -2.80  | 11.04 | 8.00E-01 |
| cg03958004 | 30.92  | 13.77 | 2.47E-02 | 32.53  | 37.07 | 3.80E-01 | 60.58   | 151.85 | 6.90E-01 | 34.43  | 15.99 | 3.13E-02 | 3.48   | 41.14 | 9.33E-01 |
| cg26820636 | -7.86  | 3.50  | 2.47E-02 | -8.29  | 5.29  | 1.17E-01 | -7.02   | 8.69   | 4.19E-01 | -17.58 | 8.93  | 4.90E-02 | -1.60  | 7.05  | 8.21E-01 |
| cg20358492 | 11.87  | 5.29  | 2.47E-02 | 23.49  | 11.38 | 3.90E-02 | 26.42   | 13.92  | 5.78E-02 | 5.51   | 5.85  | 3.46E-01 | 6.49   | 15.32 | 6.72E-01 |
| cg13065683 | -10.70 | 4.77  | 2.47E-02 | -12.35 | 6.52  | 5.84E-02 | -22.96  | 16.95  | 1.75E-01 | -0.37  | 14.27 | 9.80E-01 | -8.19  | 9.08  | 3.67E-01 |
| cg20586611 | 15.13  | 6.74  | 2.47E-02 | 8.48   | 22.09 | 7.01E-01 | 22.98   | 34.91  | 5.10E-01 | 17.78  | 7.41  | 1.65E-02 | -27.44 | 32.22 | 3.95E-01 |

|            |        |       |          |        |       |          |         |        |          |        |       |          |        |       |          |
|------------|--------|-------|----------|--------|-------|----------|---------|--------|----------|--------|-------|----------|--------|-------|----------|
| cg16580759 | 35.30  | 15.72 | 2.47E-02 | 57.53  | 18.02 | 1.41E-03 | -19.32  | 31.30  | 5.37E-01 | 41.72  | 35.47 | 2.40E-01 | 38.64  | 23.26 | 9.66E-02 |
| cg13551141 | 16.29  | 7.25  | 2.47E-02 | 12.49  | 10.95 | 2.54E-01 | 21.13   | 14.82  | 1.54E-01 | 24.89  | 16.30 | 1.27E-01 | 6.61   | 20.62 | 7.49E-01 |
| cg18771855 | 26.83  | 11.95 | 2.47E-02 | 28.95  | 29.89 | 3.33E-01 | -187.29 | 141.30 | 1.85E-01 | 24.07  | 11.65 | 3.89E-02 | 61.27  | 38.05 | 1.07E-01 |
| cg11518550 | 22.48  | 10.01 | 2.47E-02 | 23.58  | 17.29 | 1.73E-01 | 58.91   | 20.26  | 3.64E-03 | 10.63  | 7.18  | 1.39E-01 | 15.30  | 20.91 | 4.65E-01 |
| cg14129328 | -10.96 | 4.88  | 2.47E-02 | -18.57 | 9.40  | 4.82E-02 | -5.00   | 10.76  | 6.42E-01 | -14.16 | 7.65  | 6.42E-02 | 7.31   | 14.32 | 6.10E-01 |
| cg14159971 | 22.42  | 9.98  | 2.48E-02 | 38.55  | 31.96 | 2.28E-01 | 95.07   | 114.82 | 4.08E-01 | 18.84  | 11.02 | 8.74E-02 | 33.22  | 36.55 | 3.63E-01 |
| cg19284211 | 19.19  | 8.55  | 2.48E-02 | 38.67  | 11.78 | 1.03E-03 | 18.16   | 17.01  | 2.86E-01 | 9.99   | 17.53 | 5.69E-01 | 5.11   | 12.15 | 6.74E-01 |
| cg03162810 | 13.90  | 6.19  | 2.48E-02 | 8.36   | 17.07 | 6.25E-01 | -8.13   | 23.55  | 7.30E-01 | 15.10  | 7.33  | 3.93E-02 | 30.41  | 21.25 | 1.52E-01 |
| cg22381248 | -10.27 | 4.57  | 2.48E-02 | -22.80 | 10.74 | 3.38E-02 | -3.55   | 18.32  | 8.46E-01 | -6.38  | 5.56  | 2.51E-01 | -20.02 | 16.21 | 2.17E-01 |
| cg19770550 | 35.06  | 15.61 | 2.48E-02 | 61.36  | 42.21 | 1.46E-01 | -164.19 | 157.11 | 2.96E-01 | 35.07  | 17.76 | 4.84E-02 | 14.73  | 54.99 | 7.89E-01 |
| cg21028142 | -4.74  | 2.11  | 2.48E-02 | -6.89  | 3.28  | 3.57E-02 | -2.99   | 4.77   | 5.30E-01 | -3.80  | 4.89  | 4.37E-01 | -2.91  | 4.71  | 5.36E-01 |
| cg12612137 | -15.26 | 6.80  | 2.48E-02 | -10.49 | 11.11 | 3.45E-01 | -5.69   | 21.61  | 7.92E-01 | -26.56 | 12.43 | 3.27E-02 | -12.42 | 14.23 | 3.83E-01 |
| cg01875764 | 20.48  | 9.12  | 2.48E-02 | 25.33  | 15.31 | 9.79E-02 | 18.75   | 19.90  | 3.46E-01 | 25.64  | 18.01 | 1.55E-01 | 5.40   | 21.62 | 8.03E-01 |
| cg07223090 | 29.50  | 13.14 | 2.48E-02 | 19.00  | 15.53 | 2.21E-01 | 11.44   | 15.69  | 4.66E-01 | 23.62  | 19.25 | 2.20E-01 | 79.38  | 23.28 | 6.51E-04 |
| cg16745091 | 39.08  | 17.41 | 2.48E-02 | 47.71  | 21.74 | 2.82E-02 | 78.44   | 63.34  | 2.16E-01 | 4.24   | 50.44 | 9.33E-01 | 12.56  | 42.98 | 7.70E-01 |
| cg00281600 | 29.17  | 12.99 | 2.48E-02 | 20.70  | 29.15 | 4.78E-01 | 17.82   | 89.95  | 8.43E-01 | 27.08  | 15.66 | 8.37E-02 | 65.88  | 42.94 | 1.25E-01 |
| cg19673881 | 18.75  | 8.35  | 2.48E-02 | 30.88  | 14.22 | 2.99E-02 | 25.63   | 18.21  | 1.59E-01 | 2.28   | 14.46 | 8.75E-01 | 17.49  | 25.01 | 4.84E-01 |
| cg27272235 | 13.92  | 6.20  | 2.48E-02 | 10.99  | 8.39  | 1.90E-01 | 32.84   | 19.57  | 9.33E-02 | 27.76  | 20.98 | 1.86E-01 | 8.24   | 12.03 | 4.93E-01 |
| cg03510310 | 20.71  | 9.22  | 2.48E-02 | 20.05  | 18.48 | 2.78E-01 | 43.34   | 23.26  | 6.24E-02 | 12.07  | 13.36 | 3.66E-01 | 26.94  | 27.04 | 3.19E-01 |
| cg24396686 | -10.88 | 4.85  | 2.48E-02 | -4.09  | 14.05 | 7.71E-01 | -1.55   | 14.87  | 9.17E-01 | -12.94 | 5.76  | 2.47E-02 | -16.08 | 18.84 | 3.93E-01 |
| cg23238790 | 12.15  | 5.41  | 2.48E-02 | 23.54  | 13.37 | 7.83E-02 | 9.24    | 26.76  | 7.30E-01 | 9.90   | 6.31  | 1.17E-01 | 10.61  | 22.21 | 6.33E-01 |
| cg14380939 | -9.06  | 4.03  | 2.48E-02 | -8.59  | 6.26  | 1.70E-01 | -1.26   | 8.55   | 8.82E-01 | -12.48 | 10.30 | 2.25E-01 | -15.81 | 8.84  | 7.39E-02 |
| cg25971314 | 42.22  | 18.81 | 2.48E-02 | 30.23  | 22.33 | 1.76E-01 | 73.54   | 64.10  | 2.51E-01 | 49.18  | 75.83 | 5.17E-01 | 79.96  | 49.80 | 1.08E-01 |
| cg19277182 | 49.38  | 22.00 | 2.48E-02 | 43.89  | 30.26 | 1.47E-01 | 104.27  | 77.13  | 1.76E-01 | 22.56  | 55.67 | 6.85E-01 | 60.58  | 45.49 | 1.83E-01 |
| cg07818646 | -35.57 | 15.85 | 2.48E-02 | -26.25 | 40.55 | 5.17E-01 | -116.22 | 125.51 | 3.54E-01 | -29.63 | 18.38 | 1.07E-01 | -87.52 | 53.52 | 1.02E-01 |
| cg16024377 | -9.96  | 4.44  | 2.48E-02 | -21.06 | 9.42  | 2.54E-02 | -23.54  | 20.41  | 2.49E-01 | -5.90  | 5.59  | 2.91E-01 | -4.52  | 13.94 | 7.46E-01 |
| cg25261328 | 12.90  | 5.75  | 2.48E-02 | 15.44  | 8.25  | 6.12E-02 | 5.28    | 13.30  | 6.91E-01 | 48.06  | 25.75 | 6.20E-02 | 7.27   | 10.91 | 5.05E-01 |
| cg03157862 | -13.47 | 6.00  | 2.48E-02 | -16.61 | 9.43  | 7.81E-02 | -18.89  | 15.24  | 2.15E-01 | -4.10  | 12.03 | 7.33E-01 | -14.64 | 13.76 | 2.87E-01 |
| cg10750959 | 9.83   | 4.38  | 2.48E-02 | 12.94  | 5.95  | 2.97E-02 | 13.45   | 9.89   | 1.74E-01 | -2.79  | 14.37 | 8.46E-01 | 2.62   | 10.64 | 8.05E-01 |
| cg13440265 | -36.98 | 16.48 | 2.48E-02 | -40.46 | 21.39 | 5.86E-02 | -2.39   | 53.17  | 9.64E-01 | -23.68 | 63.90 | 7.11E-01 | -45.77 | 33.35 | 1.70E-01 |
| cg03944089 | 13.86  | 6.18  | 2.48E-02 | 13.01  | 8.57  | 1.29E-01 | 11.83   | 15.07  | 4.33E-01 | 17.92  | 23.23 | 4.41E-01 | 15.92  | 12.54 | 2.04E-01 |
| cg17454592 | 16.18  | 7.21  | 2.48E-02 | 16.00  | 10.14 | 1.14E-01 | 23.66   | 16.78  | 1.59E-01 | 22.22  | 25.16 | 3.77E-01 | 8.32   | 15.10 | 5.82E-01 |
| cg14231845 | -9.09  | 4.05  | 2.48E-02 | -21.64 | 9.98  | 3.01E-02 | -1.87   | 17.57  | 9.15E-01 | -6.16  | 4.85  | 2.04E-01 | -13.20 | 13.84 | 3.40E-01 |
| cg05208249 | -11.35 | 5.06  | 2.48E-02 | -23.43 | 11.72 | 4.56E-02 | -18.39  | 14.23  | 1.96E-01 | -6.19  | 6.93  | 3.72E-01 | -8.84  | 12.86 | 4.92E-01 |
| cg07575680 | 13.08  | 5.83  | 2.48E-02 | 22.69  | 9.47  | 1.66E-02 | 4.86    | 12.06  | 6.87E-01 | 6.54   | 11.94 | 5.84E-01 | 12.02  | 15.10 | 4.26E-01 |

|            |        |       |          |        |       |          |         |        |          |        |       |          |         |       |          |
|------------|--------|-------|----------|--------|-------|----------|---------|--------|----------|--------|-------|----------|---------|-------|----------|
| cg23007087 | 5.33   | 2.37  | 2.48E-02 | 4.09   | 3.51  | 2.44E-01 | 5.00    | 5.23   | 3.39E-01 | 10.68  | 4.87  | 2.84E-02 | -1.10   | 7.53  | 8.84E-01 |
| cg23940999 | 21.84  | 9.73  | 2.48E-02 | 27.14  | 12.22 | 2.63E-02 | -38.04  | 65.54  | 5.62E-01 | -4.14  | 41.24 | 9.20E-01 | 19.78   | 18.15 | 2.76E-01 |
| cg06979669 | 11.29  | 5.03  | 2.48E-02 | 10.53  | 6.59  | 1.10E-01 | 4.65    | 12.74  | 7.15E-01 | 18.14  | 22.38 | 4.18E-01 | 16.63   | 10.93 | 1.28E-01 |
| cg24398450 | -29.96 | 13.35 | 2.48E-02 | -23.15 | 15.14 | 1.26E-01 | -57.44  | 64.83  | 3.76E-01 | -77.84 | 62.18 | 2.11E-01 | -44.38  | 36.53 | 2.24E-01 |
| cg00733328 | 9.57   | 4.26  | 2.48E-02 | 10.19  | 5.98  | 8.83E-02 | 14.42   | 9.62   | 1.34E-01 | 5.94   | 12.57 | 6.36E-01 | 4.84    | 10.03 | 6.30E-01 |
| cg02097152 | 6.39   | 2.85  | 2.48E-02 | 5.69   | 3.88  | 1.42E-01 | 10.53   | 7.85   | 1.79E-01 | 11.21  | 6.89  | 1.04E-01 | 0.12    | 7.16  | 9.87E-01 |
| cg17886420 | -4.46  | 1.99  | 2.48E-02 | -5.09  | 3.11  | 1.02E-01 | -2.23   | 4.33   | 6.07E-01 | -4.40  | 4.03  | 2.74E-01 | -6.08   | 5.34  | 2.54E-01 |
| cg27442164 | 14.93  | 6.65  | 2.48E-02 | 16.43  | 10.40 | 1.14E-01 | 21.99   | 15.32  | 1.51E-01 | 0.02   | 13.99 | 9.99E-01 | 23.07   | 15.87 | 1.46E-01 |
| cg13910860 | 28.01  | 12.48 | 2.48E-02 | 40.88  | 21.28 | 5.47E-02 | -40.80  | 46.99  | 3.85E-01 | 42.01  | 28.35 | 1.38E-01 | 22.16   | 19.94 | 2.66E-01 |
| cg04302290 | 30.56  | 13.62 | 2.48E-02 | 17.93  | 14.08 | 2.03E-01 | 47.64   | 60.95  | 4.34E-01 | 162.11 | 89.06 | 6.87E-02 | 43.32   | 22.32 | 5.23E-02 |
| cg16181718 | 4.90   | 2.18  | 2.49E-02 | 2.86   | 3.97  | 4.72E-01 | 8.11    | 5.32   | 1.27E-01 | 6.29   | 3.44  | 6.75E-02 | 1.08    | 6.12  | 8.60E-01 |
| cg18155632 | -42.58 | 18.98 | 2.49E-02 | -41.29 | 24.11 | 8.68E-02 | -68.36  | 69.41  | 3.25E-01 | -65.44 | 75.52 | 3.86E-01 | -31.97  | 38.51 | 4.06E-01 |
| cg24642523 | -13.70 | 6.10  | 2.49E-02 | -11.78 | 8.95  | 1.88E-01 | -3.86   | 15.58  | 8.04E-01 | -18.45 | 15.06 | 2.21E-01 | -21.16  | 13.11 | 1.06E-01 |
| cg27305383 | -26.12 | 11.64 | 2.49E-02 | -23.81 | 16.34 | 1.45E-01 | -44.08  | 50.17  | 3.80E-01 | 30.23  | 41.57 | 4.67E-01 | -38.96  | 19.40 | 4.46E-02 |
| cg14859854 | 39.15  | 17.45 | 2.49E-02 | 23.29  | 22.37 | 2.98E-01 | 60.98   | 55.42  | 2.71E-01 | 47.72  | 50.56 | 3.45E-01 | 76.44   | 41.92 | 6.82E-02 |
| cg17080697 | 5.42   | 2.42  | 2.49E-02 | 3.47   | 3.18  | 2.75E-01 | 12.89   | 6.14   | 3.56E-02 | 6.81   | 6.79  | 3.15E-01 | 3.95    | 6.44  | 5.40E-01 |
| cg16080656 | 26.47  | 11.80 | 2.49E-02 | 30.61  | 39.43 | 4.38E-01 | 52.54   | 155.78 | 7.36E-01 | 28.44  | 12.82 | 2.65E-02 | -11.84  | 49.32 | 8.10E-01 |
| cg09492640 | -8.95  | 3.99  | 2.49E-02 | -16.31 | 8.64  | 5.92E-02 | -11.22  | 12.46  | 3.68E-01 | -3.38  | 5.36  | 5.28E-01 | -18.73  | 11.01 | 8.91E-02 |
| cg00169677 | 18.35  | 8.18  | 2.49E-02 | 28.49  | 15.85 | 7.21E-02 | 15.59   | 17.39  | 3.70E-01 | 8.20   | 9.58  | 3.92E-01 | 57.18   | 27.47 | 3.74E-02 |
| cg01066451 | 20.22  | 9.01  | 2.49E-02 | 30.52  | 18.99 | 1.08E-01 | 1.10    | 18.20  | 9.52E-01 | 15.94  | 9.41  | 9.02E-02 | 59.58   | 26.66 | 2.54E-02 |
| cg05232215 | 8.35   | 3.72  | 2.49E-02 | 5.17   | 5.25  | 3.24E-01 | 18.55   | 7.21   | 1.02E-02 | -0.94  | 9.09  | 9.18E-01 | 9.79    | 7.52  | 1.93E-01 |
| cg02699829 | 11.28  | 5.03  | 2.49E-02 | 16.87  | 7.22  | 1.95E-02 | 18.21   | 9.41   | 5.31E-02 | -2.22  | 13.10 | 8.65E-01 | -0.33   | 11.14 | 9.76E-01 |
| cg21044104 | -10.14 | 4.52  | 2.49E-02 | -8.95  | 13.43 | 5.05E-01 | -8.12   | 16.25  | 6.17E-01 | -11.33 | 5.25  | 3.09E-02 | -1.51   | 17.22 | 9.30E-01 |
| cg05317600 | -9.56  | 4.26  | 2.49E-02 | -13.06 | 7.74  | 9.19E-02 | -3.85   | 16.84  | 8.19E-01 | -4.87  | 4.77  | 3.07E-01 | -27.05  | 11.99 | 2.41E-02 |
| cg25941544 | 20.60  | 9.18  | 2.49E-02 | 12.15  | 15.70 | 4.39E-01 | 7.36    | 30.52  | 8.09E-01 | 22.24  | 14.23 | 1.18E-01 | 43.12   | 23.62 | 6.80E-02 |
| cg17075459 | -15.50 | 6.91  | 2.49E-02 | -24.22 | 12.68 | 5.62E-02 | -9.32   | 16.85  | 5.80E-01 | -17.84 | 12.91 | 1.67E-01 | -6.57   | 13.86 | 6.35E-01 |
| cg04707531 | -15.04 | 6.71  | 2.49E-02 | -14.31 | 15.06 | 3.42E-01 | -12.84  | 42.62  | 7.63E-01 | -11.75 | 8.03  | 1.43E-01 | -46.23  | 23.72 | 5.13E-02 |
| cg19553869 | 15.79  | 7.04  | 2.49E-02 | 31.85  | 11.77 | 6.82E-03 | 14.30   | 23.21  | 5.38E-01 | 7.11   | 12.21 | 5.60E-01 | 3.87    | 14.78 | 7.93E-01 |
| cg20759600 | -14.61 | 6.51  | 2.49E-02 | -17.65 | 13.43 | 1.89E-01 | -18.03  | 17.15  | 2.93E-01 | -13.32 | 10.55 | 2.07E-01 | -11.61  | 13.32 | 3.83E-01 |
| cg24391471 | 23.47  | 10.46 | 2.49E-02 | 23.44  | 16.66 | 1.59E-01 | 27.01   | 18.84  | 1.52E-01 | 41.29  | 35.19 | 2.41E-01 | 10.75   | 22.89 | 6.39E-01 |
| cg18038894 | 5.98   | 2.67  | 2.49E-02 | 4.69   | 2.94  | 1.10E-01 | 15.73   | 6.63   | 1.76E-02 | 6.97   | 8.61  | 4.19E-01 | -1.51   | 8.30  | 8.56E-01 |
| cg11186850 | -32.37 | 14.43 | 2.49E-02 | -40.26 | 20.44 | 4.89E-02 | 31.97   | 78.10  | 6.82E-01 | -66.02 | 34.12 | 5.30E-02 | -5.49   | 26.85 | 8.38E-01 |
| cg03095379 | -56.00 | 24.97 | 2.49E-02 | -43.05 | 38.39 | 2.62E-01 | -176.77 | 158.73 | 2.65E-01 | -31.96 | 21.94 | 1.45E-01 | -146.49 | 58.59 | 1.24E-02 |
| cg18361420 | 12.15  | 5.42  | 2.49E-02 | 6.34   | 7.64  | 4.07E-01 | 10.72   | 14.00  | 4.44E-01 | 8.56   | 27.03 | 7.51E-01 | 22.77   | 9.76  | 1.96E-02 |
| cg27337124 | 9.80   | 4.37  | 2.49E-02 | 2.67   | 8.59  | 7.56E-01 | 11.37   | 11.99  | 3.43E-01 | 9.06   | 6.29  | 1.50E-01 | 25.72   | 12.34 | 3.71E-02 |

|            |        |       |          |        |       |          |         |        |          |        |       |          |        |       |          |
|------------|--------|-------|----------|--------|-------|----------|---------|--------|----------|--------|-------|----------|--------|-------|----------|
| cg01195276 | 17.80  | 7.94  | 2.49E-02 | 27.39  | 16.66 | 1.00E-01 | -39.90  | 58.09  | 4.92E-01 | 16.57  | 9.80  | 9.09E-02 | 14.86  | 25.34 | 5.58E-01 |
| cg14661813 | 35.97  | 16.04 | 2.49E-02 | 16.85  | 51.63 | 7.44E-01 | -130.16 | 172.25 | 4.50E-01 | 42.16  | 17.79 | 1.78E-02 | 14.68  | 56.04 | 7.93E-01 |
| cg09507884 | -33.75 | 15.05 | 2.49E-02 | -38.91 | 17.77 | 2.86E-02 | -9.70   | 80.35  | 9.04E-01 | 29.70  | 65.34 | 6.50E-01 | -36.37 | 34.10 | 2.86E-01 |
| cg02117924 | 17.96  | 8.01  | 2.49E-02 | 22.10  | 21.36 | 3.01E-01 | 31.20   | 37.09  | 4.00E-01 | 16.58  | 9.31  | 7.48E-02 | 15.57  | 29.87 | 6.02E-01 |
| cg10685612 | 11.47  | 5.11  | 2.49E-02 | 12.20  | 8.27  | 1.40E-01 | 14.73   | 12.85  | 2.52E-01 | 14.03  | 13.06 | 2.83E-01 | 7.59   | 9.24  | 4.12E-01 |
| cg24074477 | 8.01   | 3.57  | 2.49E-02 | 7.55   | 4.99  | 1.31E-01 | 10.58   | 9.15   | 2.48E-01 | 7.93   | 8.87  | 3.72E-01 | 7.21   | 8.58  | 4.01E-01 |
| cg16165370 | 33.21  | 14.81 | 2.49E-02 | 51.71  | 20.51 | 1.17E-02 | 37.21   | 39.90  | 3.51E-01 | 10.58  | 9.34  | 2.58E-01 | 64.33  | 31.44 | 4.07E-02 |
| cg05560873 | 22.17  | 9.89  | 2.49E-02 | 16.44  | 22.38 | 4.62E-01 | 39.10   | 56.26  | 4.87E-01 | 21.28  | 11.94 | 7.48E-02 | 35.81  | 33.24 | 2.81E-01 |
| cg03134083 | -20.08 | 8.96  | 2.49E-02 | -27.62 | 20.34 | 1.75E-01 | 22.00   | 40.55  | 5.87E-01 | -16.36 | 11.07 | 1.40E-01 | -49.52 | 27.91 | 7.60E-02 |
| cg14360139 | 12.65  | 5.64  | 2.49E-02 | 15.38  | 9.83  | 1.18E-01 | 7.69    | 13.45  | 5.67E-01 | 16.76  | 15.31 | 2.74E-01 | 11.04  | 9.42  | 2.42E-01 |
| cg18264092 | -10.16 | 4.53  | 2.49E-02 | -12.48 | 7.70  | 1.05E-01 | -3.98   | 12.58  | 7.52E-01 | -12.19 | 8.26  | 1.40E-01 | -7.42  | 9.60  | 4.40E-01 |
| cg04297067 | 17.98  | 8.02  | 2.49E-02 | 35.85  | 18.25 | 4.95E-02 | -6.15   | 20.11  | 7.60E-01 | 18.90  | 11.50 | 1.00E-01 | 17.60  | 19.97 | 3.78E-01 |
| cg18271897 | 8.00   | 3.57  | 2.49E-02 | 6.95   | 4.75  | 1.43E-01 | 16.29   | 8.71   | 6.16E-02 | 6.41   | 9.97  | 5.20E-01 | 3.74   | 9.58  | 6.96E-01 |
| cg15947534 | 14.06  | 6.27  | 2.49E-02 | 19.15  | 9.61  | 4.63E-02 | 7.40    | 13.10  | 5.72E-01 | 20.14  | 17.73 | 2.56E-01 | 7.70   | 13.37 | 5.65E-01 |
| cg26599006 | 24.90  | 11.11 | 2.50E-02 | 12.84  | 20.54 | 5.32E-01 | 13.79   | 34.92  | 6.93E-01 | 16.18  | 12.44 | 1.94E-01 | 61.66  | 21.58 | 4.26E-03 |
| cg15646795 | 19.46  | 8.68  | 2.50E-02 | 37.75  | 31.82 | 2.36E-01 | -48.64  | 130.76 | 7.10E-01 | 20.23  | 9.35  | 3.04E-02 | -9.84  | 35.79 | 7.83E-01 |
| cg23905542 | 31.79  | 14.18 | 2.50E-02 | 48.38  | 35.10 | 1.68E-01 | -10.83  | 144.50 | 9.40E-01 | 33.78  | 16.34 | 3.87E-02 | -19.26 | 51.97 | 7.11E-01 |
| cg06818710 | 37.02  | 16.51 | 2.50E-02 | 34.84  | 25.09 | 1.65E-01 | -32.08  | 79.89  | 6.88E-01 | 61.94  | 30.01 | 3.90E-02 | 20.53  | 35.09 | 5.59E-01 |
| cg05635169 | -10.40 | 4.64  | 2.50E-02 | -9.94  | 6.84  | 1.46E-01 | -2.88   | 10.65  | 7.86E-01 | -9.96  | 10.80 | 3.56E-01 | -20.81 | 11.40 | 6.80E-02 |
| cg01344914 | 21.53  | 9.60  | 2.50E-02 | 27.28  | 18.14 | 1.32E-01 | 33.61   | 18.37  | 6.74E-02 | -6.19  | 20.21 | 7.59E-01 | 27.61  | 20.43 | 1.76E-01 |
| cg15988010 | 28.75  | 12.82 | 2.50E-02 | -12.88 | 39.80 | 7.46E-01 | 132.67  | 159.45 | 4.05E-01 | 37.01  | 14.46 | 1.05E-02 | 1.17   | 39.91 | 9.77E-01 |
| cg09919756 | -19.61 | 8.75  | 2.50E-02 | -11.98 | 18.79 | 5.24E-01 | -36.49  | 49.24  | 4.59E-01 | -15.23 | 10.78 | 1.58E-01 | -62.17 | 28.53 | 2.93E-02 |
| cg07889938 | 12.74  | 5.68  | 2.50E-02 | 20.81  | 7.61  | 6.27E-03 | -4.33   | 21.82  | 8.43E-01 | 9.45   | 25.08 | 7.06E-01 | 2.95   | 9.99  | 7.68E-01 |
| cg21533331 | -50.30 | 22.44 | 2.50E-02 | -56.81 | 28.75 | 4.82E-02 | -63.65  | 93.54  | 4.96E-01 | 39.30  | 65.46 | 5.48E-01 | -77.09 | 48.25 | 1.10E-01 |
| cg25074170 | 27.83  | 12.41 | 2.50E-02 | 25.63  | 17.77 | 1.49E-01 | 11.08   | 31.22  | 7.23E-01 | -2.04  | 39.92 | 9.59E-01 | 53.46  | 24.46 | 2.88E-02 |
| cg17496990 | -12.71 | 5.67  | 2.50E-02 | -24.58 | 8.19  | 2.69E-03 | 6.02    | 18.13  | 7.40E-01 | -6.93  | 4.83  | 1.51E-01 | -18.15 | 12.07 | 1.33E-01 |
| cg04747634 | 13.08  | 5.84  | 2.50E-02 | 12.03  | 7.45  | 1.06E-01 | 13.21   | 17.10  | 4.40E-01 | 33.12  | 19.36 | 8.72E-02 | 6.45   | 13.77 | 6.40E-01 |
| cg04989070 | -21.89 | 9.77  | 2.50E-02 | 5.23   | 17.93 | 7.71E-01 | -51.48  | 30.63  | 9.28E-02 | -28.51 | 10.86 | 8.63E-03 | -24.75 | 23.29 | 2.88E-01 |
| cg10538151 | -25.23 | 11.26 | 2.50E-02 | -20.63 | 16.80 | 2.20E-01 | -38.14  | 31.10  | 2.20E-01 | -18.00 | 29.93 | 5.48E-01 | -30.25 | 21.32 | 1.56E-01 |
| cg13614286 | 20.35  | 9.08  | 2.50E-02 | 34.20  | 23.47 | 1.45E-01 | 21.35   | 38.77  | 5.82E-01 | 15.37  | 11.01 | 1.63E-01 | 31.28  | 26.73 | 2.42E-01 |
| cg19402236 | 12.39  | 5.53  | 2.50E-02 | 13.72  | 7.98  | 8.57E-02 | 9.66    | 13.27  | 4.67E-01 | 23.41  | 19.73 | 2.35E-01 | 8.56   | 10.67 | 4.22E-01 |
| cg09715738 | 33.23  | 14.83 | 2.50E-02 | 66.54  | 48.72 | 1.72E-01 | 72.41   | 165.74 | 6.62E-01 | 25.02  | 16.34 | 1.26E-01 | 77.32  | 53.73 | 1.50E-01 |
| cg17838697 | 10.91  | 4.87  | 2.50E-02 | 5.02   | 9.48  | 5.97E-01 | 9.74    | 16.66  | 5.59E-01 | 12.65  | 6.86  | 6.52E-02 | 16.13  | 12.64 | 2.02E-01 |
| cg22067839 | 19.47  | 8.69  | 2.50E-02 | 30.42  | 15.65 | 5.20E-02 | 13.56   | 16.50  | 4.11E-01 | 5.48   | 17.47 | 7.54E-01 | 29.80  | 21.24 | 1.61E-01 |
| cg24013378 | 57.66  | 25.73 | 2.50E-02 | 68.64  | 32.87 | 3.68E-02 | 181.76  | 125.32 | 1.47E-01 | 13.43  | 66.14 | 8.39E-01 | 30.49  | 58.47 | 6.02E-01 |

|            |        |       |          |        |       |          |         |        |          |        |       |          |        |       |          |
|------------|--------|-------|----------|--------|-------|----------|---------|--------|----------|--------|-------|----------|--------|-------|----------|
| cg01278564 | 18.74  | 8.36  | 2.50E-02 | 17.90  | 15.45 | 2.47E-01 | 12.77   | 14.21  | 3.69E-01 | 16.04  | 17.20 | 3.51E-01 | 42.61  | 23.75 | 7.28E-02 |
| cg09287629 | 7.99   | 3.56  | 2.50E-02 | 11.80  | 5.35  | 2.74E-02 | 6.12    | 8.51   | 4.72E-01 | 11.85  | 7.87  | 1.32E-01 | -4.28  | 8.51  | 6.15E-01 |
| cg26606265 | -26.58 | 11.86 | 2.50E-02 | -32.31 | 38.76 | 4.05E-01 | 0.90    | 120.39 | 9.94E-01 | -26.78 | 12.99 | 3.93E-02 | -19.64 | 47.14 | 6.77E-01 |
| cg23287404 | 61.13  | 27.28 | 2.50E-02 | 51.95  | 31.71 | 1.01E-01 | 162.67  | 64.73  | 1.20E-02 | -5.65  | 57.63 | 9.22E-01 | 65.09  | 50.54 | 1.98E-01 |
| cg27438152 | -4.43  | 1.98  | 2.50E-02 | -5.07  | 2.67  | 5.78E-02 | -2.13   | 4.07   | 6.00E-01 | -6.02  | 7.62  | 4.30E-01 | -4.99  | 5.11  | 3.28E-01 |
| cg18118660 | 20.65  | 9.22  | 2.50E-02 | 12.42  | 17.84 | 4.86E-01 | 25.11   | 22.40  | 2.62E-01 | 23.55  | 13.40 | 7.89E-02 | 21.45  | 30.52 | 4.82E-01 |
| cg05206633 | 4.89   | 2.18  | 2.50E-02 | 5.49   | 2.94  | 6.18E-02 | 6.33    | 5.58   | 2.57E-01 | 4.21   | 5.14  | 4.13E-01 | 1.19   | 6.43  | 8.53E-01 |
| cg10236857 | 11.38  | 5.08  | 2.50E-02 | 10.68  | 6.56  | 1.03E-01 | 26.94   | 12.70  | 3.38E-02 | 8.56   | 16.86 | 6.11E-01 | -0.74  | 13.11 | 9.55E-01 |
| cg05584759 | 18.81  | 8.39  | 2.50E-02 | 18.46  | 16.06 | 2.50E-01 | 9.72    | 16.52  | 5.56E-01 | 23.70  | 15.42 | 1.24E-01 | 24.53  | 20.20 | 2.24E-01 |
| cg07007807 | -32.55 | 14.52 | 2.50E-02 | -57.91 | 40.37 | 1.51E-01 | -49.13  | 161.33 | 7.61E-01 | -28.71 | 16.18 | 7.61E-02 | -26.85 | 60.78 | 6.59E-01 |
| cg07524456 | -7.71  | 3.44  | 2.50E-02 | -10.05 | 4.70  | 3.24E-02 | -1.35   | 7.62   | 8.59E-01 | -12.93 | 12.77 | 3.11E-01 | -5.91  | 7.96  | 4.58E-01 |
| cg09404642 | -38.28 | 17.08 | 2.50E-02 | -48.67 | 22.40 | 2.98E-02 | -85.96  | 69.28  | 2.15E-01 | 34.22  | 52.25 | 5.12E-01 | -33.53 | 34.13 | 3.26E-01 |
| cg08083335 | 29.22  | 13.04 | 2.50E-02 | 17.05  | 26.12 | 5.14E-01 | 10.49   | 82.72  | 8.99E-01 | 29.57  | 16.56 | 7.43E-02 | 60.05  | 39.98 | 1.33E-01 |
| cg03214420 | -10.48 | 4.68  | 2.51E-02 | -17.17 | 9.41  | 6.79E-02 | -15.23  | 13.71  | 2.66E-01 | -5.87  | 6.81  | 3.89E-01 | -10.29 | 11.53 | 3.72E-01 |
| cg02582355 | -6.29  | 2.81  | 2.51E-02 | -8.61  | 4.10  | 3.57E-02 | -0.71   | 5.40   | 8.95E-01 | -8.64  | 9.93  | 3.84E-01 | -7.57  | 6.61  | 2.52E-01 |
| cg24836242 | -11.84 | 5.28  | 2.51E-02 | -20.29 | 8.25  | 1.39E-02 | -7.48   | 12.87  | 5.61E-01 | -9.25  | 12.68 | 4.66E-01 | -2.62  | 10.62 | 8.05E-01 |
| cg01297349 | 14.63  | 6.53  | 2.51E-02 | 3.86   | 12.87 | 7.64E-01 | 6.64    | 22.35  | 7.66E-01 | 16.55  | 8.80  | 6.02E-02 | 37.10  | 19.98 | 6.33E-02 |
| cg02656609 | -11.57 | 5.16  | 2.51E-02 | -19.52 | 9.55  | 4.11E-02 | -0.36   | 12.97  | 9.78E-01 | -12.21 | 7.79  | 1.17E-01 | -4.06  | 15.54 | 7.94E-01 |
| cg16928046 | -10.09 | 4.50  | 2.51E-02 | -9.92  | 6.75  | 1.41E-01 | -21.78  | 10.94  | 4.65E-02 | 0.54   | 10.51 | 9.59E-01 | -10.30 | 10.02 | 3.04E-01 |
| cg05777316 | 15.55  | 6.94  | 2.51E-02 | 23.18  | 12.59 | 6.56E-02 | 18.35   | 12.92  | 1.56E-01 | 4.55   | 15.95 | 7.75E-01 | 10.78  | 14.88 | 4.69E-01 |
| cg01530154 | -9.38  | 4.19  | 2.51E-02 | -7.92  | 6.20  | 2.02E-01 | -12.61  | 10.44  | 2.27E-01 | -8.18  | 10.78 | 4.48E-01 | -10.81 | 8.70  | 2.14E-01 |
| cg14302083 | 7.50   | 3.35  | 2.51E-02 | 13.20  | 6.86  | 5.44E-02 | 5.07    | 9.50   | 5.94E-01 | 5.27   | 4.49  | 2.41E-01 | 9.71   | 11.63 | 4.04E-01 |
| cg00550703 | -18.65 | 8.33  | 2.51E-02 | -9.48  | 24.03 | 6.93E-01 | 0.55    | 36.67  | 9.88E-01 | -22.13 | 9.56  | 2.07E-02 | -10.91 | 31.47 | 7.29E-01 |
| cg18575863 | -32.94 | 14.70 | 2.51E-02 | -29.43 | 19.89 | 1.39E-01 | 32.95   | 72.55  | 6.50E-01 | -33.54 | 33.94 | 3.23E-01 | -53.02 | 31.02 | 8.74E-02 |
| cg13654836 | 11.00  | 4.91  | 2.51E-02 | 13.12  | 7.19  | 6.81E-02 | 14.05   | 10.47  | 1.80E-01 | 14.69  | 11.86 | 2.15E-01 | -4.99  | 12.96 | 7.00E-01 |
| cg26956263 | 22.83  | 10.19 | 2.51E-02 | 43.28  | 33.60 | 1.98E-01 | -19.52  | 131.25 | 8.82E-01 | 25.94  | 11.24 | 2.10E-02 | -29.99 | 36.21 | 4.08E-01 |
| cg14046757 | 40.17  | 17.93 | 2.51E-02 | 114.55 | 56.08 | 4.11E-02 | -160.57 | 246.15 | 5.14E-01 | 32.91  | 19.79 | 9.62E-02 | 32.03  | 67.44 | 6.35E-01 |
| cg22775123 | -9.56  | 4.27  | 2.51E-02 | -11.44 | 6.04  | 5.82E-02 | -17.59  | 12.00  | 1.43E-01 | 4.97   | 11.84 | 6.75E-01 | -9.28  | 8.63  | 2.82E-01 |
| cg03212952 | 10.70  | 4.78  | 2.51E-02 | 5.75   | 11.09 | 6.04E-01 | 24.93   | 39.71  | 5.30E-01 | 9.87   | 5.60  | 7.81E-02 | 28.90  | 17.75 | 1.03E-01 |
| cg07675656 | 16.75  | 7.48  | 2.51E-02 | 14.19  | 11.77 | 2.28E-01 | 15.79   | 15.40  | 3.05E-01 | 30.23  | 15.37 | 4.92E-02 | 1.16   | 21.24 | 9.56E-01 |
| cg18404811 | 8.59   | 3.84  | 2.51E-02 | 9.32   | 5.13  | 6.93E-02 | 20.44   | 11.20  | 6.81E-02 | 10.91  | 11.99 | 3.63E-01 | -0.60  | 8.16  | 9.41E-01 |
| cg19117047 | -8.37  | 3.74  | 2.51E-02 | -11.40 | 5.41  | 3.50E-02 | -14.10  | 8.75   | 1.07E-01 | 4.13   | 7.84  | 5.98E-01 | -10.23 | 7.44  | 1.69E-01 |
| cg06567836 | 12.94  | 5.78  | 2.51E-02 | 2.14   | 17.18 | 9.01E-01 | 1.90    | 39.34  | 9.62E-01 | 15.41  | 6.49  | 1.76E-02 | 6.16   | 21.35 | 7.73E-01 |
| cg14091208 | 9.64   | 4.30  | 2.51E-02 | 7.39   | 6.63  | 2.65E-01 | 15.42   | 8.80   | 7.96E-02 | 17.27  | 10.74 | 1.08E-01 | 0.35   | 10.17 | 9.72E-01 |
| cg27150870 | -11.56 | 5.16  | 2.51E-02 | -11.98 | 8.05  | 1.37E-01 | -9.31   | 13.46  | 4.89E-01 | 2.10   | 12.68 | 8.68E-01 | -20.33 | 9.82  | 3.84E-02 |

|            |        |       |          |        |       |          |         |        |          |        |       |          |        |       |          |
|------------|--------|-------|----------|--------|-------|----------|---------|--------|----------|--------|-------|----------|--------|-------|----------|
| cg17468459 | 26.31  | 11.75 | 2.51E-02 | 21.25  | 20.28 | 2.95E-01 | -11.11  | 50.40  | 8.26E-01 | 24.47  | 17.89 | 1.71E-01 | 51.58  | 27.76 | 6.32E-02 |
| cg12010413 | 14.88  | 6.65  | 2.51E-02 | 11.91  | 15.89 | 4.53E-01 | 34.94   | 19.33  | 7.07E-02 | 14.51  | 8.38  | 8.36E-02 | -5.65  | 23.69 | 8.12E-01 |
| cg03255749 | 21.03  | 9.39  | 2.51E-02 | 9.86   | 13.00 | 4.48E-01 | 33.35   | 40.26  | 4.07E-01 | 6.15   | 31.20 | 8.44E-01 | 40.59  | 16.28 | 1.26E-02 |
| cg23808704 | 9.12   | 4.07  | 2.51E-02 | 9.34   | 7.47  | 2.12E-01 | 17.21   | 11.53  | 1.36E-01 | 4.55   | 6.23  | 4.66E-01 | 14.92  | 10.46 | 1.54E-01 |
| cg16426870 | -40.75 | 18.20 | 2.51E-02 | 4.09   | 42.08 | 9.23E-01 | -123.82 | 177.22 | 4.85E-01 | -44.04 | 22.45 | 4.98E-02 | -77.50 | 47.69 | 1.04E-01 |
| cg16728934 | -14.24 | 6.36  | 2.51E-02 | -22.68 | 8.09  | 5.04E-03 | -22.43  | 14.03  | 1.10E-01 | 7.07   | 14.25 | 6.20E-01 | -9.59  | 11.04 | 3.85E-01 |
| cg22155376 | 17.31  | 7.73  | 2.51E-02 | 19.06  | 10.66 | 7.38E-02 | 24.63   | 16.77  | 1.42E-01 | -7.97  | 35.61 | 8.23E-01 | 11.33  | 16.69 | 4.97E-01 |
| cg27148529 | 9.35   | 4.17  | 2.51E-02 | 11.08  | 5.52  | 4.48E-02 | 8.11    | 8.75   | 3.54E-01 | 13.89  | 18.29 | 4.48E-01 | 3.00   | 10.80 | 7.81E-01 |
| cg23983887 | -6.15  | 2.75  | 2.51E-02 | -5.72  | 4.01  | 1.54E-01 | -11.45  | 5.39   | 3.37E-02 | -1.10  | 8.00  | 8.90E-01 | -2.37  | 7.04  | 7.36E-01 |
| cg18482164 | 20.33  | 9.08  | 2.51E-02 | 36.59  | 22.05 | 9.71E-02 | 32.17   | 46.89  | 4.93E-01 | 16.41  | 11.39 | 1.50E-01 | 15.85  | 22.91 | 4.89E-01 |
| cg21963318 | 14.64  | 6.54  | 2.52E-02 | 11.63  | 8.58  | 1.75E-01 | 13.88   | 16.35  | 3.96E-01 | 17.01  | 37.93 | 6.54E-01 | 22.45  | 13.64 | 9.98E-02 |
| cg05933789 | -7.94  | 3.54  | 2.52E-02 | -6.92  | 7.06  | 3.27E-01 | -1.95   | 14.87  | 8.96E-01 | -7.66  | 4.97  | 1.23E-01 | -11.99 | 8.31  | 1.49E-01 |
| cg18538668 | -10.27 | 4.59  | 2.52E-02 | -12.80 | 6.75  | 5.80E-02 | -8.78   | 10.17  | 3.88E-01 | -7.84  | 15.11 | 6.04E-01 | -7.63  | 9.29  | 4.12E-01 |
| cg15108537 | -8.26  | 3.69  | 2.52E-02 | -12.07 | 6.85  | 7.82E-02 | -3.68   | 12.74  | 7.73E-01 | -10.15 | 5.37  | 5.88E-02 | 2.15   | 9.37  | 8.18E-01 |
| cg08577727 | 12.53  | 5.60  | 2.52E-02 | 10.12  | 8.40  | 2.28E-01 | 25.88   | 11.30  | 2.21E-02 | 7.43   | 15.38 | 6.29E-01 | 3.98   | 13.23 | 7.64E-01 |
| cg08545416 | 22.27  | 9.95  | 2.52E-02 | 15.56  | 17.34 | 3.70E-01 | 22.00   | 18.29  | 2.29E-01 | 4.31   | 17.57 | 8.06E-01 | 52.87  | 19.77 | 7.50E-03 |
| cg16895464 | -27.15 | 12.13 | 2.52E-02 | -41.51 | 41.78 | 3.21E-01 | -197.40 | 128.37 | 1.24E-01 | -25.82 | 13.14 | 4.93E-02 | 2.03   | 51.79 | 9.69E-01 |
| cg02362970 | 17.56  | 7.84  | 2.52E-02 | -10.56 | 36.83 | 7.74E-01 | 179.26  | 170.69 | 2.94E-01 | 19.87  | 8.36  | 1.74E-02 | 2.13   | 29.35 | 9.42E-01 |
| cg25630380 | -13.61 | 6.08  | 2.52E-02 | -16.87 | 9.04  | 6.19E-02 | -10.59  | 13.61  | 4.36E-01 | -5.35  | 16.63 | 7.47E-01 | -14.68 | 13.14 | 2.64E-01 |
| cg17851392 | 17.48  | 7.81  | 2.52E-02 | 33.02  | 21.10 | 1.18E-01 | 5.38    | 50.92  | 9.16E-01 | 14.09  | 8.92  | 1.14E-01 | 27.77  | 28.82 | 3.35E-01 |
| cg15711028 | 17.94  | 8.02  | 2.52E-02 | 36.63  | 17.67 | 3.82E-02 | 16.42   | 39.35  | 6.76E-01 | 10.54  | 9.79  | 2.81E-01 | 32.32  | 27.97 | 2.48E-01 |
| cg08545136 | 41.92  | 18.73 | 2.52E-02 | 51.49  | 24.19 | 3.33E-02 | 8.96    | 121.92 | 9.41E-01 | 55.91  | 38.93 | 1.51E-01 | -14.30 | 49.05 | 7.71E-01 |
| cg10855540 | -14.86 | 6.64  | 2.52E-02 | -20.16 | 13.75 | 1.43E-01 | -7.08   | 16.63  | 6.70E-01 | -11.29 | 9.80  | 2.49E-01 | -25.92 | 17.21 | 1.32E-01 |
| cg05655116 | -34.24 | 15.29 | 2.52E-02 | -33.36 | 18.79 | 7.59E-02 | -70.22  | 46.59  | 1.32E-01 | -0.08  | 62.16 | 9.99E-01 | -26.98 | 37.14 | 4.68E-01 |
| cg23234726 | -7.87  | 3.51  | 2.52E-02 | -4.98  | 6.19  | 4.21E-01 | -12.98  | 10.12  | 2.00E-01 | -6.65  | 5.46  | 2.23E-01 | -13.67 | 9.33  | 1.43E-01 |
| cg14203721 | -11.52 | 5.15  | 2.52E-02 | -21.66 | 12.59 | 8.55E-02 | -25.13  | 29.04  | 3.87E-01 | -5.99  | 6.33  | 3.44E-01 | -22.61 | 13.80 | 1.01E-01 |
| cg04521981 | 10.76  | 4.81  | 2.52E-02 | 6.92   | 11.26 | 5.39E-01 | 1.83    | 14.13  | 8.97E-01 | 15.49  | 6.16  | 1.19E-02 | -1.60  | 15.78 | 9.19E-01 |
| cg22796704 | 10.16  | 4.54  | 2.52E-02 | 6.70   | 6.36  | 2.93E-01 | 14.01   | 9.66   | 1.47E-01 | 0.69   | 15.56 | 9.64E-01 | 19.45  | 10.55 | 6.53E-02 |
| cg26335760 | 11.19  | 5.00  | 2.52E-02 | 7.05   | 7.41  | 3.41E-01 | 10.95   | 11.44  | 3.38E-01 | 20.44  | 11.73 | 8.15E-02 | 12.61  | 12.02 | 2.94E-01 |
| cg20084219 | -4.88  | 2.18  | 2.52E-02 | -1.06  | 2.45  | 6.63E-01 | -5.34   | 3.97   | 1.79E-01 | -9.62  | 5.44  | 7.71E-02 | -9.08  | 4.20  | 3.04E-02 |
| cg22321572 | 8.34   | 3.72  | 2.52E-02 | 8.62   | 5.77  | 1.35E-01 | 9.19    | 8.11   | 2.57E-01 | 6.98   | 9.99  | 4.85E-01 | 7.86   | 7.71  | 3.08E-01 |
| cg07980405 | -41.30 | 18.45 | 2.52E-02 | -32.98 | 23.08 | 1.53E-01 | -44.91  | 98.12  | 6.47E-01 | -68.13 | 62.91 | 2.79E-01 | -53.32 | 37.68 | 1.57E-01 |
| cg00686926 | 8.44   | 3.77  | 2.52E-02 | 9.99   | 5.29  | 5.91E-02 | 9.08    | 7.89   | 2.50E-01 | 9.53   | 10.65 | 3.71E-01 | 0.71   | 10.15 | 9.44E-01 |
| cg23732629 | -4.84  | 2.16  | 2.52E-02 | -6.77  | 3.80  | 7.53E-02 | -3.73   | 5.15   | 4.68E-01 | -4.73  | 3.50  | 1.76E-01 | -1.58  | 6.28  | 8.01E-01 |
| cg27217253 | -7.46  | 3.33  | 2.52E-02 | -6.85  | 4.75  | 1.49E-01 | -16.58  | 8.01   | 3.83E-02 | 5.84   | 11.14 | 6.00E-01 | -7.09  | 6.74  | 2.93E-01 |

|            |        |       |          |        |       |          |         |        |          |        |       |          |        |       |          |
|------------|--------|-------|----------|--------|-------|----------|---------|--------|----------|--------|-------|----------|--------|-------|----------|
| cg14921757 | 26.57  | 11.87 | 2.52E-02 | 24.93  | 15.47 | 1.07E-01 | 82.23   | 53.87  | 1.27E-01 | 8.54   | 28.37 | 7.63E-01 | 34.19  | 27.45 | 2.13E-01 |
| cg02691091 | 23.16  | 10.35 | 2.52E-02 | 15.94  | 23.79 | 5.03E-01 | 47.97   | 33.60  | 1.53E-01 | 13.92  | 10.38 | 1.80E-01 | 65.30  | 29.66 | 2.77E-02 |
| cg03839074 | 7.32   | 3.27  | 2.52E-02 | 8.67   | 4.64  | 6.17E-02 | 3.67    | 6.61   | 5.79E-01 | 8.71   | 10.31 | 3.98E-01 | 7.85   | 8.24  | 3.41E-01 |
| cg25364469 | 12.57  | 5.62  | 2.52E-02 | 9.37   | 13.92 | 5.01E-01 | 23.68   | 18.86  | 2.09E-01 | 13.33  | 6.99  | 5.66E-02 | 3.34   | 17.43 | 8.48E-01 |
| cg00110545 | -7.54  | 3.37  | 2.52E-02 | -7.22  | 5.12  | 1.58E-01 | -11.37  | 6.18   | 6.59E-02 | -4.96  | 9.17  | 5.89E-01 | -2.72  | 9.15  | 7.66E-01 |
| cg23752007 | 9.82   | 4.39  | 2.52E-02 | 13.67  | 6.39  | 3.25E-02 | 14.18   | 9.05   | 1.17E-01 | -2.07  | 11.61 | 8.58E-01 | 2.26   | 11.27 | 8.41E-01 |
| cg01136942 | 16.95  | 7.57  | 2.52E-02 | 14.32  | 14.32 | 3.17E-01 | 25.39   | 16.83  | 1.31E-01 | 22.61  | 11.87 | 5.68E-02 | -12.63 | 22.75 | 5.79E-01 |
| cg06344576 | 24.66  | 11.02 | 2.52E-02 | 25.27  | 15.85 | 1.11E-01 | 45.79   | 22.85  | 4.51E-02 | 16.78  | 31.52 | 5.95E-01 | -1.56  | 27.39 | 9.55E-01 |
| cg14676666 | -9.66  | 4.31  | 2.52E-02 | -15.08 | 8.00  | 5.95E-02 | -13.97  | 11.59  | 2.28E-01 | -7.40  | 6.63  | 2.65E-01 | -1.39  | 11.25 | 9.02E-01 |
| cg03343453 | 14.95  | 6.68  | 2.52E-02 | 14.73  | 18.59 | 4.28E-01 | 13.86   | 25.59  | 5.88E-01 | 11.50  | 7.84  | 1.42E-01 | 48.84  | 24.11 | 4.28E-02 |
| cg08332594 | 25.15  | 11.24 | 2.52E-02 | 34.03  | 16.93 | 4.45E-02 | 39.53   | 45.34  | 3.83E-01 | 24.53  | 43.07 | 5.69E-01 | 14.10  | 17.14 | 4.11E-01 |
| cg18245365 | 58.70  | 26.24 | 2.52E-02 | 33.21  | 59.73 | 5.78E-01 | -252.79 | 185.91 | 1.74E-01 | 70.30  | 26.11 | 7.10E-03 | 81.03  | 72.42 | 2.63E-01 |
| cg24662243 | -19.69 | 8.80  | 2.53E-02 | -13.86 | 14.13 | 3.27E-01 | -24.84  | 49.09  | 6.13E-01 | -31.57 | 13.90 | 2.32E-02 | -4.83  | 20.78 | 8.16E-01 |
| cg02151754 | 16.84  | 7.52  | 2.53E-02 | 28.65  | 25.33 | 2.58E-01 | 46.55   | 108.88 | 6.69E-01 | 17.16  | 8.22  | 3.69E-02 | -4.18  | 28.58 | 8.84E-01 |
| cg06969265 | 23.92  | 10.69 | 2.53E-02 | 55.28  | 27.53 | 4.46E-02 | 20.22   | 129.30 | 8.76E-01 | 22.07  | 12.23 | 7.10E-02 | -18.24 | 38.25 | 6.33E-01 |
| cg25716149 | -10.63 | 4.75  | 2.53E-02 | -21.10 | 8.43  | 1.23E-02 | -12.47  | 12.74  | 3.28E-01 | -2.32  | 5.88  | 6.94E-01 | -14.50 | 10.27 | 1.58E-01 |
| cg25778446 | -11.11 | 4.97  | 2.53E-02 | -12.51 | 9.51  | 1.89E-01 | -1.14   | 10.95  | 9.17E-01 | -12.79 | 8.76  | 1.44E-01 | -16.72 | 11.08 | 1.31E-01 |
| cg03874978 | -14.44 | 6.45  | 2.53E-02 | -19.57 | 10.99 | 7.50E-02 | -6.57   | 12.37  | 5.95E-01 | -8.45  | 17.33 | 6.26E-01 | -19.37 | 13.06 | 1.38E-01 |
| cg01613817 | 23.62  | 10.56 | 2.53E-02 | 16.95  | 13.84 | 2.21E-01 | 22.09   | 27.36  | 4.19E-01 | 17.11  | 34.09 | 6.16E-01 | 50.80  | 25.31 | 4.47E-02 |
| cg07700680 | -18.16 | 8.12  | 2.53E-02 | -9.58  | 13.31 | 4.72E-01 | -18.24  | 38.39  | 6.35E-01 | -27.88 | 11.53 | 1.56E-02 | 0.40   | 27.41 | 9.88E-01 |
| cg05744487 | 10.86  | 4.85  | 2.53E-02 | 9.19   | 8.04  | 2.53E-01 | -2.00   | 12.37  | 8.72E-01 | 14.25  | 9.10  | 1.17E-01 | 19.12  | 10.95 | 8.09E-02 |
| cg13788090 | 44.73  | 20.00 | 2.53E-02 | 83.86  | 55.90 | 1.34E-01 | -118.64 | 224.24 | 5.97E-01 | 30.99  | 22.74 | 1.73E-01 | 120.70 | 66.27 | 6.85E-02 |
| cg17642201 | -24.32 | 10.87 | 2.53E-02 | -41.20 | 21.89 | 5.98E-02 | 3.79    | 27.93  | 8.92E-01 | -27.58 | 15.78 | 8.04E-02 | -12.85 | 30.50 | 6.73E-01 |
| cg23173307 | 19.71  | 8.81  | 2.53E-02 | 13.80  | 25.44 | 5.88E-01 | 2.89    | 30.56  | 9.25E-01 | 22.05  | 10.44 | 3.46E-02 | 24.95  | 30.43 | 4.12E-01 |
| cg03673624 | -58.42 | 26.12 | 2.53E-02 | -77.47 | 35.00 | 2.69E-02 | 155.83  | 136.33 | 2.53E-01 | -71.53 | 61.62 | 2.46E-01 | -35.95 | 54.85 | 5.12E-01 |
| cg07198170 | 13.71  | 6.13  | 2.53E-02 | 10.76  | 15.26 | 4.81E-01 | 18.50   | 15.66  | 2.38E-01 | 10.80  | 7.81  | 1.66E-01 | 35.75  | 23.25 | 1.24E-01 |
| cg07359306 | 9.81   | 4.39  | 2.53E-02 | 14.63  | 6.39  | 2.20E-02 | 10.80   | 9.61   | 2.61E-01 | 5.12   | 10.41 | 6.22E-01 | -1.69  | 11.59 | 8.84E-01 |
| cg05721773 | 15.11  | 6.75  | 2.53E-02 | 10.43  | 8.98  | 2.46E-01 | 29.20   | 16.37  | 7.44E-02 | 14.64  | 20.57 | 4.77E-01 | 17.05  | 17.10 | 3.19E-01 |
| cg19535394 | -43.53 | 19.46 | 2.53E-02 | -34.44 | 27.35 | 2.08E-01 | -102.00 | 53.10  | 5.47E-02 | -52.58 | 46.65 | 2.60E-01 | -17.49 | 45.20 | 6.99E-01 |
| cg07493097 | -11.81 | 5.28  | 2.53E-02 | -23.87 | 8.01  | 2.88E-03 | -20.73  | 14.88  | 1.63E-01 | -4.35  | 4.50  | 3.34E-01 | -7.96  | 9.07  | 3.80E-01 |
| cg01293143 | 13.34  | 5.97  | 2.53E-02 | 13.68  | 8.79  | 1.19E-01 | 17.60   | 11.95  | 1.41E-01 | 19.56  | 21.47 | 3.62E-01 | 5.38   | 12.92 | 6.77E-01 |
| cg03978658 | 8.97   | 4.01  | 2.53E-02 | 9.23   | 5.04  | 6.72E-02 | 13.11   | 10.65  | 2.18E-01 | 3.42   | 12.29 | 7.81E-01 | 7.65   | 11.67 | 5.12E-01 |
| cg10479431 | 7.24   | 3.24  | 2.53E-02 | 8.19   | 4.05  | 4.34E-02 | 10.60   | 8.24   | 1.98E-01 | -2.15  | 10.09 | 8.31E-01 | 5.76   | 10.04 | 5.66E-01 |
| cg17434366 | -22.68 | 10.14 | 2.53E-02 | -26.73 | 12.09 | 2.70E-02 | 39.66   | 37.94  | 2.96E-01 | -19.86 | 41.65 | 6.33E-01 | -33.38 | 24.90 | 1.80E-01 |
| cg06650206 | -13.51 | 6.04  | 2.53E-02 | -10.44 | 11.23 | 3.52E-01 | 11.07   | 27.39  | 6.86E-01 | -16.05 | 8.18  | 4.99E-02 | -19.52 | 17.66 | 2.69E-01 |



|               |        |       |          |        |       |          |         |        |          |        |       |          |        |       |          |
|---------------|--------|-------|----------|--------|-------|----------|---------|--------|----------|--------|-------|----------|--------|-------|----------|
| cg10597322    | 11.76  | 5.26  | 2.53E-02 | 11.77  | 11.03 | 2.86E-01 | 17.80   | 14.12  | 2.07E-01 | 14.43  | 7.18  | 4.44E-02 | -11.66 | 16.88 | 4.90E-01 |
| cg22126171    | -9.80  | 4.38  | 2.53E-02 | -9.00  | 10.14 | 3.74E-01 | -12.98  | 15.78  | 4.11E-01 | -9.06  | 5.72  | 1.13E-01 | -12.07 | 11.38 | 2.89E-01 |
| cg14794043    | 12.85  | 5.75  | 2.53E-02 | 11.47  | 9.94  | 2.48E-01 | 5.93    | 12.08  | 6.23E-01 | 28.94  | 14.41 | 4.46E-02 | 10.95  | 10.86 | 3.13E-01 |
| cg10013969    | -9.47  | 4.23  | 2.53E-02 | -5.44  | 6.71  | 4.17E-01 | 3.18    | 10.51  | 7.62E-01 | -12.63 | 6.50  | 5.19E-02 | -20.53 | 9.17  | 2.52E-02 |
| cg08064269    | 12.12  | 5.42  | 2.53E-02 | 18.83  | 12.83 | 1.42E-01 | 13.88   | 24.67  | 5.74E-01 | 8.99   | 6.53  | 1.69E-01 | 22.38  | 18.58 | 2.28E-01 |
| cg23605991    | 11.57  | 5.18  | 2.53E-02 | 4.33   | 7.40  | 5.58E-01 | 16.04   | 13.07  | 2.20E-01 | 27.88  | 14.16 | 4.90E-02 | 14.58  | 11.02 | 1.86E-01 |
| cg08817937    | -32.48 | 14.52 | 2.54E-02 | -87.30 | 69.71 | 2.10E-01 | -341.55 | 212.90 | 1.09E-01 | -29.32 | 15.47 | 5.80E-02 | -17.67 | 54.89 | 7.48E-01 |
| cg14324255    | -22.16 | 9.91  | 2.54E-02 | -13.81 | 15.27 | 3.66E-01 | 0.65    | 36.53  | 9.86E-01 | 7.52   | 58.53 | 8.98E-01 | -34.87 | 14.36 | 1.52E-02 |
| cg23855505    | -33.64 | 15.05 | 2.54E-02 | -61.79 | 33.22 | 6.29E-02 | 30.47   | 165.62 | 8.54E-01 | -19.00 | 17.43 | 2.76E-01 | -96.93 | 52.38 | 6.42E-02 |
| cg07185131    | 28.12  | 12.58 | 2.54E-02 | 70.31  | 23.31 | 2.56E-03 | 8.47    | 37.67  | 8.22E-01 | 17.22  | 11.74 | 1.43E-01 | 19.83  | 21.07 | 3.47E-01 |
| cg11179513    | -37.47 | 16.76 | 2.54E-02 | -41.75 | 35.65 | 2.42E-01 | 172.07  | 115.35 | 1.36E-01 | -41.02 | 13.99 | 3.37E-03 | -49.76 | 55.80 | 3.73E-01 |
| cg11950292    | -12.97 | 5.80  | 2.54E-02 | -2.82  | 18.23 | 8.77E-01 | -19.53  | 43.17  | 6.51E-01 | -12.62 | 6.44  | 5.00E-02 | -30.00 | 21.96 | 1.72E-01 |
| cg14236430    | -13.86 | 6.20  | 2.54E-02 | -22.95 | 16.01 | 1.52E-01 | -8.84   | 20.45  | 6.66E-01 | -11.87 | 7.66  | 1.21E-01 | -17.83 | 19.44 | 3.59E-01 |
| cg09512891    | -3.47  | 1.55  | 2.54E-02 | -4.05  | 2.21  | 6.65E-02 | 1.89    | 3.70   | 6.09E-01 | -5.23  | 4.38  | 2.33E-01 | -5.69  | 3.47  | 1.01E-01 |
| cg10415314    | -9.68  | 4.33  | 2.54E-02 | -15.60 | 8.86  | 7.83E-02 | -5.01   | 13.18  | 7.04E-01 | -7.25  | 6.14  | 2.37E-01 | -11.58 | 10.98 | 2.92E-01 |
| cg08250738    | -8.48  | 3.79  | 2.54E-02 | -24.30 | 10.18 | 1.70E-02 | -6.09   | 20.61  | 7.68E-01 | -5.81  | 4.52  | 1.99E-01 | -6.55  | 10.78 | 5.43E-01 |
| cg05262382    | 7.67   | 3.43  | 2.54E-02 | 6.35   | 4.52  | 1.60E-01 | -2.40   | 8.98   | 7.89E-01 | 7.11   | 4.78  | 1.37E-01 | 20.66  | 8.12  | 1.10E-02 |
| cg02696201    | -11.51 | 5.15  | 2.54E-02 | -11.02 | 12.10 | 3.62E-01 | -21.00  | 22.81  | 3.57E-01 | -7.92  | 6.33  | 2.11E-01 | -30.13 | 15.79 | 5.63E-02 |
| cg19260329    | 9.15   | 4.09  | 2.54E-02 | 2.41   | 6.67  | 7.17E-01 | 14.71   | 6.38   | 2.11E-02 | 21.17  | 13.70 | 1.22E-01 | 2.37   | 11.72 | 8.40E-01 |
| cg06118122    | -14.48 | 6.48  | 2.54E-02 | -15.86 | 15.61 | 3.10E-01 | -1.84   | 21.32  | 9.31E-01 | -13.47 | 8.31  | 1.05E-01 | -26.63 | 18.18 | 1.43E-01 |
| cg06884254    | 12.34  | 5.52  | 2.54E-02 | 12.18  | 8.74  | 1.63E-01 | 14.82   | 11.39  | 1.93E-01 | 6.05   | 11.60 | 6.02E-01 | 18.82  | 14.79 | 2.03E-01 |
| cg12381416    | 6.06   | 2.71  | 2.54E-02 | 6.80   | 4.47  | 1.28E-01 | 13.52   | 7.15   | 5.87E-02 | 2.18   | 4.64  | 6.38E-01 | 5.91   | 7.09  | 4.05E-01 |
| ch.3.1432250F | -26.89 | 12.03 | 2.54E-02 | -16.22 | 16.24 | 3.18E-01 | -3.38   | 39.27  | 9.32E-01 | -95.33 | 66.36 | 1.51E-01 | -44.81 | 21.13 | 3.39E-02 |
| cg03599224    | -14.07 | 6.30  | 2.54E-02 | -21.24 | 10.54 | 4.38E-02 | -6.39   | 13.29  | 6.31E-01 | -20.35 | 15.67 | 1.94E-01 | -6.87  | 12.43 | 5.80E-01 |
| cg15164958    | 25.60  | 11.45 | 2.54E-02 | 14.27  | 13.88 | 3.04E-01 | 4.00    | 52.00  | 9.39E-01 | 69.12  | 25.62 | 6.99E-03 | 21.20  | 16.15 | 1.89E-01 |
| cg00293660    | 8.21   | 3.67  | 2.54E-02 | 8.07   | 6.49  | 2.14E-01 | 3.57    | 10.41  | 7.31E-01 | 10.30  | 5.81  | 7.65E-02 | 6.84   | 9.29  | 4.62E-01 |
| cg14209920    | 12.22  | 5.47  | 2.54E-02 | 14.16  | 8.64  | 1.01E-01 | 6.18    | 11.58  | 5.94E-01 | 23.24  | 11.04 | 3.52E-02 | -4.02  | 15.08 | 7.90E-01 |
| cg03682823    | 18.47  | 8.27  | 2.55E-02 | 16.43  | 13.12 | 2.10E-01 | 9.78    | 16.30  | 5.48E-01 | 50.44  | 23.55 | 3.22E-02 | 14.46  | 17.54 | 4.10E-01 |
| cg23023844    | 4.14   | 1.85  | 2.55E-02 | 4.74   | 2.56  | 6.37E-02 | -0.63   | 3.88   | 8.71E-01 | 7.36   | 7.00  | 2.94E-01 | 7.27   | 4.42  | 9.99E-02 |
| cg25499746    | -19.57 | 8.76  | 2.55E-02 | -10.39 | 16.74 | 5.35E-01 | -38.48  | 36.88  | 2.97E-01 | -21.70 | 12.09 | 7.26E-02 | -21.81 | 22.98 | 3.43E-01 |
| cg07378309    | -9.78  | 4.38  | 2.55E-02 | -9.30  | 6.74  | 1.68E-01 | 0.07    | 9.42   | 9.94E-01 | -13.18 | 11.53 | 2.53E-01 | -18.19 | 9.36  | 5.20E-02 |
| cg21932513    | 13.19  | 5.90  | 2.55E-02 | 20.14  | 9.93  | 4.25E-02 | 14.00   | 13.14  | 2.87E-01 | 14.82  | 10.89 | 1.73E-01 | -7.44  | 15.24 | 6.26E-01 |
| cg21878650    | 7.72   | 3.46  | 2.55E-02 | 6.42   | 4.53  | 1.56E-01 | 6.02    | 7.66   | 4.31E-01 | 7.42   | 15.59 | 6.34E-01 | 14.46  | 8.49  | 8.86E-02 |
| cg05988698    | -13.57 | 6.07  | 2.55E-02 | -7.20  | 15.62 | 6.45E-01 | -0.71   | 28.56  | 9.80E-01 | -15.63 | 7.08  | 2.73E-02 | -13.96 | 23.15 | 5.47E-01 |
| cg00401091    | 26.01  | 11.64 | 2.55E-02 | -10.91 | 35.46 | 7.58E-01 | 5.86    | 190.73 | 9.76E-01 | 30.89  | 12.83 | 1.61E-02 | 26.54  | 45.39 | 5.59E-01 |

|            |        |       |          |        |       |          |        |        |          |        |       |          |        |       |          |
|------------|--------|-------|----------|--------|-------|----------|--------|--------|----------|--------|-------|----------|--------|-------|----------|
| cg10318528 | -10.06 | 4.50  | 2.55E-02 | -16.49 | 7.66  | 3.13E-02 | -4.26  | 9.82   | 6.64E-01 | -5.40  | 9.66  | 5.76E-01 | -10.09 | 9.46  | 2.86E-01 |
| cg15396800 | -11.62 | 5.20  | 2.55E-02 | -17.34 | 8.53  | 4.19E-02 | 7.03   | 13.19  | 5.94E-01 | -10.88 | 9.00  | 2.27E-01 | -19.07 | 14.03 | 1.74E-01 |
| cg19738283 | 15.25  | 6.83  | 2.55E-02 | 34.25  | 22.63 | 1.30E-01 | 88.99  | 72.66  | 2.21E-01 | 12.68  | 7.50  | 9.08E-02 | 11.75  | 25.63 | 6.47E-01 |
| cg09006498 | 37.06  | 16.59 | 2.55E-02 | 39.98  | 35.71 | 2.63E-01 | -10.05 | 126.50 | 9.37E-01 | 34.56  | 19.97 | 8.36E-02 | 61.60  | 59.60 | 3.01E-01 |
| cg14377594 | 11.31  | 5.06  | 2.55E-02 | 22.52  | 9.34  | 1.59E-02 | 7.62   | 10.38  | 4.63E-01 | 11.78  | 10.26 | 2.51E-01 | 0.05   | 10.69 | 9.97E-01 |
| cg25324261 | -27.29 | 12.22 | 2.55E-02 | -24.78 | 15.29 | 1.05E-01 | -3.69  | 122.69 | 9.76E-01 | 32.42  | 66.29 | 6.25E-01 | -39.46 | 21.67 | 6.86E-02 |
| cg06207728 | 19.54  | 8.74  | 2.55E-02 | 13.93  | 16.67 | 4.03E-01 | 17.05  | 15.66  | 2.76E-01 | 14.25  | 18.12 | 4.31E-01 | 39.25  | 20.62 | 5.69E-02 |
| cg22437276 | -6.20  | 2.77  | 2.55E-02 | -3.63  | 3.92  | 3.55E-01 | -0.89  | 4.02   | 8.26E-01 | -15.34 | 6.65  | 2.11E-02 | -9.48  | 3.87  | 1.44E-02 |
| cg19262563 | -9.10  | 4.07  | 2.55E-02 | -6.01  | 7.13  | 3.99E-01 | 1.20   | 12.98  | 9.26E-01 | -9.29  | 6.50  | 1.53E-01 | -19.79 | 9.55  | 3.82E-02 |
| cg00928226 | 23.87  | 10.69 | 2.55E-02 | 48.50  | 20.97 | 2.07E-02 | -2.99  | 39.64  | 9.40E-01 | 17.41  | 14.43 | 2.28E-01 | 16.32  | 30.94 | 5.98E-01 |
| cg06873916 | 11.86  | 5.31  | 2.55E-02 | 20.51  | 16.37 | 2.10E-01 | 1.08   | 23.75  | 9.64E-01 | 7.96   | 6.87  | 2.47E-01 | 19.84  | 10.70 | 6.37E-02 |
| cg15211864 | 19.71  | 8.83  | 2.55E-02 | 26.49  | 19.81 | 1.81E-01 | 13.14  | 33.77  | 6.97E-01 | 16.07  | 10.96 | 1.42E-01 | 37.20  | 30.42 | 2.21E-01 |
| cg02914501 | -10.17 | 4.56  | 2.55E-02 | -13.72 | 5.78  | 1.75E-02 | 0.20   | 13.43  | 9.88E-01 | 13.64  | 28.28 | 6.30E-01 | -8.50  | 9.36  | 3.64E-01 |
| cg15701412 | -11.27 | 5.05  | 2.55E-02 | -14.18 | 12.19 | 2.45E-01 | -34.24 | 30.99  | 2.69E-01 | -12.36 | 6.01  | 3.96E-02 | 8.23   | 16.27 | 6.13E-01 |
| cg10031042 | -18.74 | 8.39  | 2.55E-02 | -12.89 | 15.22 | 3.97E-01 | -18.93 | 30.15  | 5.30E-01 | -14.67 | 12.02 | 2.22E-01 | -47.13 | 23.11 | 4.14E-02 |
| cg15561305 | -8.04  | 3.60  | 2.55E-02 | -8.62  | 5.53  | 1.19E-01 | -15.46 | 8.36   | 6.44E-02 | -9.60  | 9.13  | 2.93E-01 | -0.15  | 7.41  | 9.84E-01 |
| cg13644262 | 9.91   | 4.44  | 2.55E-02 | 12.26  | 6.52  | 6.00E-02 | 16.15  | 9.58   | 9.17E-02 | -6.47  | 13.35 | 6.28E-01 | 6.98   | 9.63  | 4.69E-01 |
| cg06630494 | 29.34  | 13.14 | 2.55E-02 | 14.73  | 16.46 | 3.71E-01 | 36.40  | 46.68  | 4.36E-01 | 70.10  | 40.01 | 7.97E-02 | 54.06  | 31.30 | 8.41E-02 |
| cg26511972 | -5.95  | 2.67  | 2.55E-02 | -4.79  | 4.24  | 2.59E-01 | -3.23  | 4.30   | 4.52E-01 | -18.74 | 10.08 | 6.30E-02 | -10.03 | 6.88  | 1.45E-01 |
| cg01719100 | 16.97  | 7.60  | 2.55E-02 | 25.90  | 15.13 | 8.69E-02 | 13.60  | 16.73  | 4.16E-01 | 8.03   | 11.33 | 4.79E-01 | 44.10  | 25.18 | 7.99E-02 |
| cg10659138 | -9.73  | 4.36  | 2.55E-02 | -7.32  | 8.78  | 4.05E-01 | 14.34  | 15.47  | 3.54E-01 | -13.57 | 6.10  | 2.62E-02 | -13.04 | 10.73 | 2.24E-01 |
| cg24507266 | 7.51   | 3.36  | 2.55E-02 | 9.80   | 4.77  | 3.98E-02 | 8.97   | 7.32   | 2.21E-01 | 16.75  | 11.95 | 1.61E-01 | -2.72  | 7.28  | 7.09E-01 |
| cg03382549 | -10.87 | 4.87  | 2.55E-02 | -16.50 | 9.97  | 9.80E-02 | -12.93 | 12.45  | 2.99E-01 | -9.66  | 7.10  | 1.73E-01 | -3.03  | 13.04 | 8.16E-01 |
| cg18947570 | -33.54 | 15.02 | 2.55E-02 | -41.85 | 20.37 | 4.00E-02 | -5.63  | 42.16  | 8.94E-01 | 19.76  | 48.60 | 6.84E-01 | -51.10 | 31.02 | 9.96E-02 |
| cg16604066 | 27.93  | 12.51 | 2.55E-02 | 48.67  | 22.32 | 2.92E-02 | 22.41  | 22.86  | 3.27E-01 | 6.52   | 16.29 | 6.89E-01 | 64.35  | 33.42 | 5.41E-02 |
| cg25318211 | -10.85 | 4.86  | 2.55E-02 | -4.49  | 13.89 | 7.47E-01 | -2.09  | 19.62  | 9.15E-01 | -12.08 | 5.68  | 3.33E-02 | -15.85 | 16.86 | 3.47E-01 |
| cg00763594 | -10.08 | 4.51  | 2.55E-02 | -7.72  | 10.26 | 4.52E-01 | -4.79  | 18.45  | 7.95E-01 | -9.78  | 5.64  | 8.30E-02 | -19.08 | 13.81 | 1.67E-01 |
| cg27281690 | 9.97   | 4.47  | 2.55E-02 | 12.99  | 6.08  | 3.27E-02 | 19.63  | 11.08  | 7.66E-02 | 2.75   | 11.47 | 8.10E-01 | -4.37  | 11.68 | 7.08E-01 |
| cg07224291 | -15.81 | 7.08  | 2.55E-02 | -28.89 | 9.18  | 1.65E-03 | -29.00 | 12.17  | 1.72E-02 | -4.93  | 4.79  | 3.03E-01 | -6.92  | 11.04 | 5.30E-01 |
| cg14227486 | 14.94  | 6.69  | 2.55E-02 | 15.88  | 9.69  | 1.01E-01 | 15.11  | 17.10  | 3.77E-01 | 28.02  | 18.98 | 1.40E-01 | 6.39   | 13.51 | 6.36E-01 |
| cg23093404 | -18.23 | 8.16  | 2.55E-02 | -37.95 | 16.56 | 2.20E-02 | 9.94   | 19.18  | 6.04E-01 | -18.79 | 9.04  | 3.77E-02 | -19.46 | 22.57 | 3.89E-01 |
| cg07784054 | 17.64  | 7.90  | 2.56E-02 | 19.47  | 13.92 | 1.62E-01 | -4.02  | 44.10  | 9.27E-01 | 13.55  | 10.66 | 2.03E-01 | 41.90  | 25.39 | 9.89E-02 |
| cg01295022 | 33.74  | 15.11 | 2.56E-02 | 54.33  | 18.65 | 3.58E-03 | 31.42  | 36.94  | 3.95E-01 | 50.29  | 44.27 | 2.56E-01 | -3.91  | 25.33 | 8.77E-01 |
| cg07807497 | -10.18 | 4.56  | 2.56E-02 | -14.46 | 10.01 | 1.49E-01 | -7.58  | 18.35  | 6.80E-01 | -7.57  | 5.82  | 1.94E-01 | -17.49 | 13.22 | 1.86E-01 |
| cg11386098 | -11.80 | 5.29  | 2.56E-02 | -14.08 | 6.82  | 3.88E-02 | -1.77  | 9.54   | 8.53E-01 | -0.27  | 13.09 | 9.83E-01 | -25.04 | 9.56  | 8.80E-03 |

|              |        |       |          |        |       |          |         |        |          |        |        |          |        |       |          |
|--------------|--------|-------|----------|--------|-------|----------|---------|--------|----------|--------|--------|----------|--------|-------|----------|
| cg19739774   | -7.11  | 3.18  | 2.56E-02 | -11.71 | 6.41  | 6.77E-02 | -16.71  | 11.87  | 1.59E-01 | -5.81  | 4.34   | 1.80E-01 | 0.77   | 8.42  | 9.27E-01 |
| cg01680054   | -8.93  | 4.00  | 2.56E-02 | -1.26  | 9.11  | 8.90E-01 | -11.17  | 14.55  | 4.43E-01 | -9.90  | 5.07   | 5.09E-02 | -15.35 | 12.07 | 2.03E-01 |
| cg22097768   | 14.38  | 6.44  | 2.56E-02 | 15.16  | 11.92 | 2.03E-01 | 12.21   | 15.54  | 4.32E-01 | 5.83   | 11.78  | 6.21E-01 | 25.74  | 13.21 | 5.14E-02 |
| cg01710607   | -11.76 | 5.27  | 2.56E-02 | -12.38 | 10.61 | 2.43E-01 | 6.14    | 26.17  | 8.14E-01 | -12.21 | 6.91   | 7.71E-02 | -14.05 | 14.45 | 3.31E-01 |
| cg22678708   | -33.29 | 14.91 | 2.56E-02 | -34.24 | 18.04 | 5.77E-02 | -99.07  | 63.28  | 1.17E-01 | 52.89  | 64.33  | 4.11E-01 | -34.86 | 32.69 | 2.86E-01 |
| cg26736341   | -9.01  | 4.04  | 2.56E-02 | -8.67  | 5.91  | 1.42E-01 | -8.13   | 8.34   | 3.30E-01 | -23.03 | 13.05  | 7.75E-02 | -4.20  | 8.97  | 6.39E-01 |
| cg23685712   | 21.10  | 9.45  | 2.56E-02 | 37.68  | 24.06 | 1.17E-01 | -31.99  | 36.04  | 3.75E-01 | 22.89  | 12.59  | 6.90E-02 | 21.52  | 20.47 | 2.93E-01 |
| cg11793413   | 8.49   | 3.80  | 2.56E-02 | 12.32  | 6.66  | 6.44E-02 | 1.60    | 11.51  | 8.90E-01 | 3.94   | 5.81   | 4.97E-01 | 19.07  | 10.27 | 6.34E-02 |
| cg05981785   | 9.34   | 4.18  | 2.56E-02 | 11.07  | 5.74  | 5.36E-02 | 17.70   | 9.96   | 7.55E-02 | -5.35  | 10.74  | 6.18E-01 | 8.14   | 11.20 | 4.67E-01 |
| cg25661142   | 18.91  | 8.47  | 2.56E-02 | 39.07  | 15.45 | 1.14E-02 | 9.04    | 37.14  | 8.08E-01 | 13.22  | 11.41  | 2.47E-01 | -6.30  | 27.41 | 8.18E-01 |
| cg16441550   | 20.58  | 9.22  | 2.56E-02 | 41.51  | 16.66 | 1.27E-02 | 16.03   | 16.41  | 3.29E-01 | 4.21   | 19.92  | 8.33E-01 | 11.63  | 22.80 | 6.10E-01 |
| cg04481170   | 8.17   | 3.66  | 2.56E-02 | 9.10   | 5.12  | 7.54E-02 | 12.74   | 9.44   | 1.77E-01 | 8.23   | 9.22   | 3.72E-01 | 1.69   | 8.61  | 8.45E-01 |
| cg18825458   | 26.18  | 11.73 | 2.56E-02 | 20.37  | 13.67 | 1.36E-01 | 5.65    | 49.50  | 9.09E-01 | 44.92  | 53.13  | 3.98E-01 | 54.56  | 29.41 | 6.35E-02 |
| cg23123163   | 22.50  | 10.08 | 2.56E-02 | 34.88  | 29.35 | 2.35E-01 | 12.48   | 113.85 | 9.13E-01 | 18.32  | 11.27  | 1.04E-01 | 49.00  | 37.03 | 1.86E-01 |
| cg04360233   | 20.58  | 9.22  | 2.56E-02 | 25.88  | 15.17 | 8.79E-02 | -3.16   | 16.97  | 8.52E-01 | 35.57  | 20.02  | 7.57E-02 | 35.59  | 26.19 | 1.74E-01 |
| cg18487246   | 43.36  | 19.42 | 2.56E-02 | 40.89  | 22.76 | 7.24E-02 | -7.21   | 83.82  | 9.31E-01 | -2.47  | 79.19  | 9.75E-01 | 89.46  | 48.92 | 6.74E-02 |
| cg14369981   | 5.94   | 2.66  | 2.56E-02 | 4.63   | 3.43  | 1.76E-01 | 9.16    | 6.23   | 1.42E-01 | 6.32   | 10.36  | 5.42E-01 | 7.16   | 6.93  | 3.01E-01 |
| cg24480012   | 12.68  | 5.68  | 2.56E-02 | 26.87  | 15.42 | 8.13E-02 | 36.78   | 46.12  | 4.25E-01 | 11.27  | 6.60   | 8.76E-02 | 1.13   | 17.23 | 9.47E-01 |
| cg03220447   | -30.26 | 13.55 | 2.56E-02 | -33.16 | 13.83 | 1.65E-02 | -66.01  | 25.33  | 9.15E-03 | 31.62  | 36.19  | 3.82E-01 | -26.71 | 17.89 | 1.35E-01 |
| cg18376817   | 23.87  | 10.69 | 2.56E-02 | 51.37  | 20.63 | 1.28E-02 | 13.84   | 23.76  | 5.60E-01 | 12.20  | 7.92   | 1.23E-01 | 52.42  | 33.91 | 1.22E-01 |
| cg14748160   | 43.42  | 19.45 | 2.56E-02 | -6.11  | 48.43 | 9.00E-01 | -179.27 | 224.93 | 4.25E-01 | 61.27  | 21.50  | 4.37E-03 | 7.42   | 60.82 | 9.03E-01 |
| cg06692785   | 9.40   | 4.21  | 2.56E-02 | 13.20  | 6.31  | 3.63E-02 | 4.20    | 9.85   | 6.70E-01 | 8.92   | 9.40   | 3.42E-01 | 5.59   | 10.17 | 5.83E-01 |
| cg02471149   | -10.24 | 4.59  | 2.56E-02 | -12.92 | 9.54  | 1.76E-01 | -23.84  | 18.61  | 2.00E-01 | -9.81  | 6.04   | 1.04E-01 | -1.01  | 12.74 | 9.37E-01 |
| cg27405644   | 45.96  | 20.59 | 2.56E-02 | 54.74  | 25.02 | 2.87E-02 | 143.41  | 108.80 | 1.87E-01 | 41.72  | 102.01 | 6.83E-01 | 8.34   | 41.49 | 8.41E-01 |
| cg16121470   | -14.27 | 6.39  | 2.56E-02 | -11.29 | 8.36  | 1.77E-01 | -29.69  | 16.73  | 7.59E-02 | 9.23   | 37.18  | 8.04E-01 | -15.04 | 13.07 | 2.50E-01 |
| cg14168923   | 17.69  | 7.93  | 2.56E-02 | 54.31  | 26.49 | 4.03E-02 | 20.91   | 34.34  | 5.43E-01 | 12.32  | 9.50   | 1.95E-01 | 19.44  | 19.73 | 3.24E-01 |
| cg09017619   | 23.02  | 10.32 | 2.56E-02 | 10.76  | 28.48 | 7.05E-01 | -51.25  | 93.23  | 5.82E-01 | 27.60  | 11.91  | 2.05E-02 | 14.37  | 31.65 | 6.50E-01 |
| cg08546707   | 9.55   | 4.28  | 2.56E-02 | 11.33  | 6.02  | 5.98E-02 | 0.48    | 8.21   | 9.53E-01 | 19.90  | 15.85  | 2.09E-01 | 14.92  | 11.03 | 1.76E-01 |
| ch.2.800013F | 27.56  | 12.35 | 2.56E-02 | 10.50  | 17.80 | 5.56E-01 | 46.77   | 78.05  | 5.49E-01 | 55.80  | 23.81  | 1.91E-02 | 28.13  | 26.03 | 2.80E-01 |
| cg11603443   | 6.03   | 2.70  | 2.56E-02 | 7.59   | 3.70  | 4.05E-02 | 2.64    | 6.33   | 6.76E-01 | 0.23   | 10.39  | 9.83E-01 | 6.87   | 5.79  | 2.36E-01 |
| cg20911168   | -32.71 | 14.66 | 2.57E-02 | -10.99 | 40.57 | 7.86E-01 | -57.98  | 38.56  | 1.33E-01 | -37.38 | 17.74  | 3.51E-02 | 62.32  | 71.35 | 3.82E-01 |
| cg11516004   | -9.51  | 4.26  | 2.57E-02 | -22.06 | 12.08 | 6.79E-02 | -20.89  | 22.94  | 3.63E-01 | -5.84  | 4.90   | 2.33E-01 | -19.27 | 14.68 | 1.89E-01 |
| cg26602100   | -45.76 | 20.51 | 2.57E-02 | -49.77 | 25.96 | 5.52E-02 | -77.78  | 73.19  | 2.88E-01 | -37.18 | 71.85  | 6.05E-01 | -25.76 | 44.14 | 5.59E-01 |
| cg02129885   | 14.49  | 6.49  | 2.57E-02 | 17.77  | 8.66  | 4.01E-02 | 23.41   | 16.28  | 1.51E-01 | 26.36  | 22.41  | 2.39E-01 | -7.40  | 14.71 | 6.15E-01 |
| cg01794802   | -8.61  | 3.86  | 2.57E-02 | -3.85  | 9.50  | 6.86E-01 | -5.79   | 17.74  | 7.44E-01 | -9.69  | 4.68   | 3.86E-02 | -10.35 | 11.72 | 3.77E-01 |

|            |        |       |          |        |       |          |         |        |          |        |       |          |        |       |          |
|------------|--------|-------|----------|--------|-------|----------|---------|--------|----------|--------|-------|----------|--------|-------|----------|
| cg27287167 | 9.43   | 4.23  | 2.57E-02 | 9.35   | 5.35  | 8.02E-02 | 17.25   | 11.04  | 1.18E-01 | 9.03   | 12.93 | 4.85E-01 | 0.77   | 12.12 | 9.49E-01 |
| cg15240876 | -7.34  | 3.29  | 2.57E-02 | -13.98 | 6.51  | 3.17E-02 | -4.75   | 8.97   | 5.97E-01 | -6.85  | 4.70  | 1.45E-01 | 1.76   | 9.42  | 8.51E-01 |
| cg23670794 | -17.27 | 7.74  | 2.57E-02 | -30.64 | 11.76 | 9.21E-03 | -28.00  | 19.38  | 1.48E-01 | -4.76  | 5.51  | 3.88E-01 | -22.22 | 14.78 | 1.33E-01 |
| cg03437186 | 16.28  | 7.30  | 2.57E-02 | 28.68  | 13.26 | 3.05E-02 | 1.60    | 13.94  | 9.08E-01 | 21.09  | 16.33 | 1.96E-01 | 13.16  | 15.42 | 3.94E-01 |
| cg14652038 | 10.50  | 4.71  | 2.57E-02 | 18.67  | 7.22  | 9.72E-03 | 2.70    | 8.84   | 7.60E-01 | 8.92   | 13.84 | 5.19E-01 | 4.39   | 11.20 | 6.95E-01 |
| cg11141336 | 18.58  | 8.33  | 2.57E-02 | 45.27  | 19.12 | 1.79E-02 | 2.30    | 21.76  | 9.16E-01 | 13.74  | 11.06 | 2.14E-01 | 19.22  | 26.78 | 4.73E-01 |
| cg03422204 | -50.03 | 22.42 | 2.57E-02 | -46.54 | 31.67 | 1.42E-01 | -203.93 | 95.28  | 3.23E-02 | -27.27 | 60.20 | 6.50E-01 | -38.13 | 40.64 | 3.48E-01 |
| cg18594467 | -10.05 | 4.50  | 2.57E-02 | -3.88  | 8.85  | 6.61E-01 | -1.96   | 11.85  | 8.68E-01 | -12.28 | 6.78  | 7.00E-02 | -21.52 | 11.44 | 5.99E-02 |
| cg26036806 | -40.20 | 18.02 | 2.57E-02 | -42.58 | 22.31 | 5.63E-02 | -16.72  | 77.03  | 8.28E-01 | -76.44 | 72.69 | 2.93E-01 | -29.42 | 37.47 | 4.32E-01 |
| cg11838384 | 26.91  | 12.06 | 2.57E-02 | 41.81  | 19.89 | 3.55E-02 | -20.94  | 31.65  | 5.08E-01 | 17.22  | 25.65 | 5.02E-01 | 38.04  | 19.31 | 4.89E-02 |
| cg14258935 | -64.65 | 28.98 | 2.57E-02 | -59.85 | 54.78 | 2.75E-01 | 32.27   | 222.18 | 8.85E-01 | -81.69 | 41.11 | 4.69E-02 | -38.10 | 63.83 | 5.51E-01 |
| cg04527612 | -11.58 | 5.19  | 2.57E-02 | -23.43 | 10.63 | 2.75E-02 | 3.97    | 16.46  | 8.09E-01 | -9.99  | 7.37  | 1.75E-01 | -8.62  | 12.76 | 4.99E-01 |
| cg17104596 | -9.15  | 4.10  | 2.57E-02 | -20.66 | 9.16  | 2.42E-02 | -9.59   | 14.29  | 5.02E-01 | -6.89  | 5.24  | 1.88E-01 | 0.08   | 12.77 | 9.95E-01 |
| cg21760363 | 14.30  | 6.41  | 2.57E-02 | 8.10   | 19.53 | 6.78E-01 | 6.28    | 41.18  | 8.79E-01 | 17.69  | 7.17  | 1.36E-02 | -12.70 | 24.49 | 6.04E-01 |
| cg16654806 | 22.36  | 10.03 | 2.57E-02 | 22.61  | 12.35 | 6.73E-02 | -18.80  | 41.21  | 6.48E-01 | 23.85  | 33.11 | 4.71E-01 | 33.59  | 22.97 | 1.44E-01 |
| cg06204938 | 9.12   | 4.09  | 2.57E-02 | 3.91   | 5.66  | 4.89E-01 | 14.67   | 10.38  | 1.57E-01 | 21.02  | 10.65 | 4.84E-02 | 9.74   | 9.81  | 3.20E-01 |
| cg20090957 | -12.41 | 5.56  | 2.57E-02 | -3.68  | 8.74  | 6.73E-01 | -10.49  | 13.48  | 4.36E-01 | -22.42 | 13.22 | 9.00E-02 | -20.82 | 11.17 | 6.24E-02 |
| cg08468322 | 19.66  | 8.82  | 2.57E-02 | 20.08  | 11.74 | 8.72E-02 | 1.22    | 17.61  | 9.45E-01 | 61.06  | 29.19 | 3.64E-02 | 22.68  | 21.60 | 2.94E-01 |
| cg26161997 | 9.76   | 4.38  | 2.57E-02 | 10.63  | 6.02  | 7.75E-02 | 11.61   | 9.62   | 2.28E-01 | 13.39  | 14.31 | 3.49E-01 | 2.87   | 10.58 | 7.86E-01 |
| cg07707586 | -11.28 | 5.06  | 2.57E-02 | -22.72 | 9.94  | 2.22E-02 | -11.42  | 12.81  | 3.73E-01 | -3.11  | 6.76  | 6.45E-01 | -20.38 | 13.94 | 1.44E-01 |
| cg21333338 | 10.31  | 4.62  | 2.57E-02 | 14.19  | 6.77  | 3.62E-02 | 18.19   | 10.40  | 8.04E-02 | 3.36   | 11.55 | 7.71E-01 | -2.38  | 10.96 | 8.28E-01 |
| cg16731266 | -6.33  | 2.84  | 2.57E-02 | -7.68  | 4.17  | 6.53E-02 | -13.00  | 5.85   | 2.62E-02 | -7.04  | 3.14  | 2.52E-02 | 4.50   | 6.03  | 4.56E-01 |
| cg12709244 | 34.68  | 15.55 | 2.57E-02 | 56.82  | 39.54 | 1.51E-01 | -216.27 | 185.54 | 2.44E-01 | 36.89  | 18.01 | 4.05E-02 | -1.07  | 51.12 | 9.83E-01 |
| cg23917744 | -11.74 | 5.26  | 2.57E-02 | -22.28 | 8.95  | 1.28E-02 | -22.52  | 11.85  | 5.74E-02 | -4.64  | 6.82  | 4.96E-01 | -3.03  | 10.14 | 7.65E-01 |
| cg02174359 | 20.30  | 9.10  | 2.57E-02 | 12.43  | 11.04 | 2.60E-01 | 48.53   | 17.45  | 5.43E-03 | 6.19   | 32.59 | 8.49E-01 | 12.17  | 18.16 | 5.03E-01 |
| cg14108380 | -9.27  | 4.16  | 2.57E-02 | -9.53  | 6.38  | 1.35E-01 | -7.91   | 11.20  | 4.80E-01 | -10.45 | 10.52 | 3.20E-01 | -8.91  | 7.85  | 2.57E-01 |
| cg18794622 | -12.07 | 5.41  | 2.57E-02 | -18.49 | 10.49 | 7.81E-02 | 7.87    | 18.59  | 6.72E-01 | -11.79 | 7.79  | 1.30E-01 | -12.80 | 13.30 | 3.36E-01 |
| cg25880537 | -11.25 | 5.05  | 2.57E-02 | -5.25  | 7.29  | 4.71E-01 | -3.77   | 8.81   | 6.69E-01 | -11.17 | 10.92 | 3.06E-01 | -24.47 | 7.93  | 2.04E-03 |
| cg26981076 | 6.22   | 2.79  | 2.57E-02 | 6.32   | 3.60  | 7.91E-02 | 9.97    | 7.09   | 1.60E-01 | 8.16   | 8.04  | 3.10E-01 | -0.81  | 7.91  | 9.19E-01 |
| cg06412759 | -17.26 | 7.74  | 2.58E-02 | -21.16 | 12.32 | 8.58E-02 | -20.58  | 30.30  | 4.97E-01 | -5.75  | 11.21 | 6.08E-01 | -49.62 | 23.38 | 3.38E-02 |
| cg03893271 | 13.53  | 6.07  | 2.58E-02 | 26.63  | 9.75  | 6.30E-03 | 0.72    | 15.16  | 9.62E-01 | 18.34  | 10.99 | 9.53E-02 | 4.12   | 8.82  | 6.41E-01 |
| cg11260422 | 18.61  | 8.35  | 2.58E-02 | 33.79  | 16.55 | 4.12E-02 | 10.49   | 12.80  | 4.12E-01 | 38.00  | 26.18 | 1.47E-01 | 7.74   | 17.85 | 6.65E-01 |
| cg03534031 | 5.86   | 2.63  | 2.58E-02 | 4.97   | 3.78  | 1.89E-01 | 7.08    | 5.61   | 2.07E-01 | 6.26   | 6.02  | 2.98E-01 | 6.62   | 7.99  | 4.07E-01 |
| cg26973018 | -15.06 | 6.75  | 2.58E-02 | -21.18 | 10.97 | 5.36E-02 | -4.27   | 14.00  | 7.60E-01 | -19.32 | 16.51 | 2.42E-01 | -12.69 | 14.36 | 3.77E-01 |
| cg13628325 | 20.32  | 9.11  | 2.58E-02 | 8.54   | 14.48 | 5.55E-01 | 19.31   | 19.17  | 3.14E-01 | 26.13  | 31.87 | 4.12E-01 | 35.27  | 16.75 | 3.53E-02 |

|            |        |       |          |        |       |          |         |        |          |        |       |          |        |       |          |
|------------|--------|-------|----------|--------|-------|----------|---------|--------|----------|--------|-------|----------|--------|-------|----------|
| cg03820695 | 14.85  | 6.66  | 2.58E-02 | 37.50  | 17.39 | 3.11E-02 | 16.67   | 33.69  | 6.21E-01 | 9.43   | 7.76  | 2.24E-01 | 22.79  | 24.07 | 3.44E-01 |
| cg16629523 | 6.15   | 2.76  | 2.58E-02 | 1.70   | 4.28  | 6.91E-01 | 8.27    | 4.90   | 9.11E-02 | 10.16  | 8.34  | 2.23E-01 | 10.73  | 6.91  | 1.20E-01 |
| cg23425316 | 15.80  | 7.09  | 2.58E-02 | 11.92  | 16.64 | 4.74E-01 | 42.51   | 19.11  | 2.61E-02 | 11.50  | 11.88 | 3.33E-01 | 11.38  | 12.44 | 3.60E-01 |
| cg14602839 | 18.90  | 8.48  | 2.58E-02 | 3.55   | 20.34 | 8.61E-01 | 9.36    | 46.63  | 8.41E-01 | 21.03  | 10.19 | 3.91E-02 | 33.64  | 26.52 | 2.05E-01 |
| cg20223728 | 18.50  | 8.30  | 2.58E-02 | 5.89   | 17.53 | 7.37E-01 | -8.84   | 27.77  | 7.50E-01 | 29.24  | 11.54 | 1.13E-02 | 16.82  | 20.11 | 4.03E-01 |
| cg18310205 | 23.27  | 10.44 | 2.58E-02 | 30.58  | 18.52 | 9.87E-02 | 4.99    | 46.83  | 9.15E-01 | 12.47  | 15.30 | 4.15E-01 | 44.84  | 25.51 | 7.87E-02 |
| cg04189320 | -16.44 | 7.38  | 2.58E-02 | -3.31  | 10.38 | 7.50E-01 | -26.65  | 13.68  | 5.14E-02 | -9.94  | 17.10 | 5.61E-01 | -33.29 | 14.88 | 2.53E-02 |
| cg06463800 | -48.98 | 21.97 | 2.58E-02 | -43.40 | 27.83 | 1.19E-01 | -108.22 | 137.34 | 4.31E-01 | -8.14  | 96.33 | 9.33E-01 | -62.64 | 40.18 | 1.19E-01 |
| cg09017434 | 6.65   | 2.98  | 2.58E-02 | 10.19  | 4.85  | 3.56E-02 | 5.07    | 6.72   | 4.50E-01 | 12.21  | 8.21  | 1.37E-01 | 0.62   | 5.51  | 9.10E-01 |
| cg16225405 | 27.75  | 12.45 | 2.58E-02 | 20.98  | 24.35 | 3.89E-01 | 18.32   | 56.32  | 7.45E-01 | 21.57  | 16.97 | 2.04E-01 | 64.43  | 31.98 | 4.39E-02 |
| cg27441114 | 7.29   | 3.27  | 2.58E-02 | 8.96   | 4.51  | 4.71E-02 | 10.09   | 7.93   | 2.03E-01 | -0.60  | 7.48  | 9.36E-01 | 8.59   | 9.65  | 3.73E-01 |
| cg10692363 | 7.69   | 3.45  | 2.58E-02 | 8.39   | 4.59  | 6.76E-02 | 8.83    | 8.02   | 2.71E-01 | 13.60  | 13.41 | 3.11E-01 | 2.28   | 8.04  | 7.76E-01 |
| cg00920139 | 13.67  | 6.13  | 2.58E-02 | 26.80  | 11.69 | 2.19E-02 | 18.09   | 14.75  | 2.20E-01 | 12.56  | 6.23  | 4.37E-02 | -13.39 | 17.55 | 4.45E-01 |
| cg24926465 | -8.02  | 3.60  | 2.58E-02 | -11.48 | 8.27  | 1.65E-01 | -16.03  | 11.66  | 1.69E-01 | -4.49  | 4.73  | 3.43E-01 | -12.57 | 9.71  | 1.96E-01 |
| cg06623274 | -9.69  | 4.35  | 2.58E-02 | -13.86 | 7.99  | 8.30E-02 | -3.97   | 10.96  | 7.17E-01 | -10.13 | 6.62  | 1.26E-01 | -5.20  | 12.74 | 6.84E-01 |
| cg14305028 | 19.73  | 8.85  | 2.58E-02 | 18.87  | 17.85 | 2.90E-01 | 6.27    | 16.25  | 6.99E-01 | 26.37  | 17.44 | 1.31E-01 | 32.26  | 19.82 | 1.04E-01 |
| cg16256643 | 16.93  | 7.59  | 2.58E-02 | 15.32  | 10.22 | 1.34E-01 | 32.77   | 19.95  | 1.00E-01 | -5.90  | 41.09 | 8.86E-01 | 14.59  | 14.65 | 3.19E-01 |
| cg13299325 | -9.53  | 4.28  | 2.58E-02 | -12.90 | 5.21  | 1.32E-02 | 3.62    | 8.65   | 6.76E-01 | -20.58 | 11.04 | 6.24E-02 | -8.41  | 8.00  | 2.93E-01 |
| cg08522340 | 5.99   | 2.69  | 2.58E-02 | 7.41   | 4.17  | 7.57E-02 | 0.59    | 7.07   | 9.34E-01 | 8.51   | 4.87  | 8.08E-02 | 1.78   | 7.28  | 8.07E-01 |
| cg24873842 | 12.73  | 5.71  | 2.58E-02 | 16.69  | 10.44 | 1.10E-01 | -0.43   | 13.01  | 9.73E-01 | 11.59  | 9.07  | 2.01E-01 | 29.07  | 17.16 | 9.03E-02 |
| cg16071219 | -6.25  | 2.80  | 2.58E-02 | -2.50  | 4.13  | 5.45E-01 | -9.94   | 5.29   | 6.04E-02 | -11.17 | 8.48  | 1.88E-01 | -7.26  | 7.24  | 3.16E-01 |
| cg14235271 | 18.09  | 8.11  | 2.58E-02 | 19.29  | 19.84 | 3.31E-01 | 23.29   | 41.11  | 5.71E-01 | 22.34  | 9.69  | 2.12E-02 | -18.16 | 26.56 | 4.94E-01 |
| cg14542646 | 32.97  | 14.79 | 2.58E-02 | 22.13  | 18.49 | 2.31E-01 | 37.38   | 22.30  | 9.37E-02 | 11.14  | 11.56 | 3.35E-01 | 94.27  | 30.15 | 1.77E-03 |
| cg02288301 | 24.15  | 10.83 | 2.58E-02 | 32.74  | 17.66 | 6.37E-02 | -9.93   | 28.53  | 7.28E-01 | 51.48  | 29.73 | 8.34E-02 | 18.52  | 18.41 | 3.14E-01 |
| cg08041364 | 37.28  | 16.72 | 2.58E-02 | -10.27 | 45.89 | 8.23E-01 | 29.37   | 137.92 | 8.31E-01 | 48.96  | 19.73 | 1.31E-02 | 22.70  | 45.65 | 6.19E-01 |
| cg05614904 | -28.36 | 12.73 | 2.58E-02 | -25.85 | 15.08 | 8.66E-02 | -91.51  | 62.44  | 1.43E-01 | -27.66 | 60.65 | 6.48E-01 | -24.40 | 28.27 | 3.88E-01 |
| cg10090212 | 20.22  | 9.07  | 2.58E-02 | 19.38  | 20.68 | 3.49E-01 | 65.64   | 45.25  | 1.47E-01 | 16.59  | 11.12 | 1.36E-01 | 27.54  | 28.39 | 3.32E-01 |
| cg13048008 | 9.23   | 4.14  | 2.58E-02 | 9.37   | 5.17  | 6.96E-02 | 16.17   | 12.96  | 2.12E-01 | 13.69  | 13.91 | 3.25E-01 | 2.07   | 10.13 | 8.38E-01 |
| cg25021575 | 21.64  | 9.71  | 2.58E-02 | 22.07  | 21.33 | 3.01E-01 | -47.53  | 42.77  | 2.66E-01 | 25.66  | 12.38 | 3.82E-02 | 29.60  | 27.37 | 2.79E-01 |
| cg25684349 | -10.04 | 4.50  | 2.58E-02 | -6.28  | 6.06  | 3.00E-01 | -22.21  | 10.42  | 3.31E-02 | 3.56   | 16.50 | 8.29E-01 | -14.46 | 10.46 | 1.67E-01 |
| cg14930065 | 11.12  | 4.99  | 2.58E-02 | 11.08  | 7.29  | 1.29E-01 | 14.48   | 9.75   | 1.37E-01 | 1.31   | 15.89 | 9.34E-01 | 11.72  | 12.05 | 3.31E-01 |
| cg01003815 | -8.61  | 3.86  | 2.58E-02 | -12.37 | 8.52  | 1.47E-01 | -7.24   | 14.51  | 6.18E-01 | -7.67  | 4.81  | 1.11E-01 | -7.77  | 13.76 | 5.72E-01 |
| cg15726245 | 15.01  | 6.74  | 2.58E-02 | 10.61  | 14.52 | 4.65E-01 | 17.72   | 21.20  | 4.03E-01 | 15.17  | 8.85  | 8.66E-02 | 20.53  | 20.77 | 3.23E-01 |
| cg16620537 | 26.96  | 12.10 | 2.58E-02 | 38.91  | 17.15 | 2.33E-02 | -9.52   | 39.45  | 8.09E-01 | 3.85   | 33.60 | 9.09E-01 | 28.69  | 22.91 | 2.11E-01 |
| cg22786472 | -9.01  | 4.04  | 2.58E-02 | -14.14 | 6.82  | 3.82E-02 | -7.37   | 11.04  | 5.05E-01 | -1.25  | 7.10  | 8.60E-01 | -13.90 | 9.25  | 1.33E-01 |

|            |        |       |          |        |       |          |         |        |          |        |       |          |         |       |          |
|------------|--------|-------|----------|--------|-------|----------|---------|--------|----------|--------|-------|----------|---------|-------|----------|
| cg19603195 | 28.00  | 12.56 | 2.58E-02 | 14.67  | 15.09 | 3.31E-01 | 26.68   | 23.30  | 2.52E-01 | 107.12 | 45.01 | 1.73E-02 | 28.90   | 21.07 | 1.70E-01 |
| cg03122201 | 24.17  | 10.84 | 2.58E-02 | 26.71  | 24.76 | 2.81E-01 | 10.46   | 54.80  | 8.49E-01 | 26.62  | 13.31 | 4.55E-02 | 9.12    | 33.48 | 7.85E-01 |
| cg17491031 | 16.15  | 7.25  | 2.58E-02 | 14.43  | 15.59 | 3.55E-01 | -4.15   | 25.61  | 8.71E-01 | 18.36  | 9.50  | 5.32E-02 | 22.01   | 20.80 | 2.90E-01 |
| cg06865992 | 9.04   | 4.06  | 2.58E-02 | 10.36  | 5.50  | 5.97E-02 | -3.70   | 10.36  | 7.21E-01 | 26.34  | 19.31 | 1.73E-01 | 10.89   | 7.99  | 1.73E-01 |
| cg10155026 | -11.08 | 4.97  | 2.58E-02 | -13.61 | 7.06  | 5.38E-02 | 0.34    | 12.96  | 9.79E-01 | -17.46 | 13.30 | 1.89E-01 | -8.94   | 10.69 | 4.03E-01 |
| cg10639428 | 25.42  | 11.41 | 2.59E-02 | 5.36   | 19.18 | 7.80E-01 | 38.91   | 22.03  | 7.74E-02 | 15.69  | 17.06 | 3.58E-01 | 62.21   | 26.82 | 2.03E-02 |
| cg02834871 | 21.29  | 9.55  | 2.59E-02 | 16.75  | 18.85 | 3.74E-01 | 8.76    | 20.53  | 6.69E-01 | 29.25  | 15.22 | 5.46E-02 | 26.90   | 26.28 | 3.06E-01 |
| cg14666892 | -53.89 | 24.18 | 2.59E-02 | -37.54 | 29.38 | 2.01E-01 | -141.61 | 131.66 | 2.82E-01 | -19.91 | 75.91 | 7.93E-01 | -115.69 | 55.90 | 3.85E-02 |
| cg05289022 | 10.06  | 4.51  | 2.59E-02 | 6.75   | 6.13  | 2.71E-01 | 23.43   | 11.52  | 4.19E-02 | 10.67  | 12.68 | 4.00E-01 | 8.14    | 10.68 | 4.46E-01 |
| cg14016166 | -17.80 | 7.99  | 2.59E-02 | -15.05 | 17.21 | 3.82E-01 | -26.22  | 37.24  | 4.81E-01 | -17.15 | 10.18 | 9.20E-02 | -22.77  | 22.84 | 3.19E-01 |
| cg02642958 | 16.48  | 7.40  | 2.59E-02 | 25.26  | 9.86  | 1.04E-02 | 21.08   | 31.47  | 5.03E-01 | 21.00  | 27.36 | 4.43E-01 | -1.41   | 13.31 | 9.16E-01 |
| cg02334109 | 10.62  | 4.77  | 2.59E-02 | 13.36  | 6.80  | 4.95E-02 | 9.40    | 10.56  | 3.73E-01 | -3.04  | 17.97 | 8.66E-01 | 10.05   | 9.85  | 3.08E-01 |
| cg01921126 | -6.33  | 2.84  | 2.59E-02 | -6.90  | 5.31  | 1.94E-01 | -4.39   | 7.39   | 5.52E-01 | -5.87  | 4.51  | 1.93E-01 | -8.14   | 6.90  | 2.38E-01 |
| cg05037628 | 18.19  | 8.16  | 2.59E-02 | -5.34  | 24.43 | 8.27E-01 | -54.72  | 119.34 | 6.47E-01 | 24.15  | 8.96  | 7.05E-03 | -18.53  | 35.22 | 5.99E-01 |
| cg25918541 | 21.85  | 9.80  | 2.59E-02 | 10.97  | 28.30 | 6.98E-01 | -7.97   | 70.04  | 9.09E-01 | 27.45  | 11.15 | 1.38E-02 | -6.45   | 33.35 | 8.47E-01 |
| cg04198914 | -5.20  | 2.33  | 2.59E-02 | -5.99  | 3.29  | 6.88E-02 | -4.69   | 5.34   | 3.79E-01 | -7.96  | 9.65  | 4.10E-01 | -3.34   | 4.68  | 4.76E-01 |
| cg12977146 | 23.16  | 10.39 | 2.59E-02 | 35.32  | 32.89 | 2.83E-01 | 39.69   | 99.14  | 6.89E-01 | 21.11  | 11.49 | 6.62E-02 | 27.16   | 39.10 | 4.87E-01 |
| cg18583378 | 15.84  | 7.11  | 2.59E-02 | 33.66  | 16.96 | 4.71E-02 | 1.61    | 28.10  | 9.54E-01 | 17.49  | 9.34  | 6.11E-02 | -1.81   | 16.77 | 9.14E-01 |
| cg12864853 | 26.40  | 11.85 | 2.59E-02 | 42.75  | 18.48 | 2.07E-02 | -9.06   | 34.08  | 7.90E-01 | 36.24  | 25.80 | 1.60E-01 | 8.85    | 23.39 | 7.05E-01 |
| cg20249071 | -25.96 | 11.65 | 2.59E-02 | -15.04 | 14.59 | 3.03E-01 | -17.42  | 31.31  | 5.78E-01 | -14.47 | 7.20  | 4.44E-02 | -66.68  | 19.01 | 4.53E-04 |
| cg14684088 | 19.97  | 8.96  | 2.59E-02 | 22.23  | 14.19 | 1.17E-01 | 25.48   | 16.86  | 1.31E-01 | 13.20  | 21.04 | 5.30E-01 | 10.96   | 24.29 | 6.52E-01 |
| cg20402747 | -41.58 | 18.66 | 2.59E-02 | -42.17 | 25.44 | 9.74E-02 | 113.15  | 105.82 | 2.85E-01 | -66.71 | 46.26 | 1.49E-01 | -43.11  | 36.06 | 2.32E-01 |
| cg03502656 | 6.89   | 3.09  | 2.59E-02 | 7.75   | 4.36  | 7.58E-02 | 2.63    | 8.64   | 7.61E-01 | 9.52   | 9.36  | 3.09E-01 | 6.21    | 6.04  | 3.04E-01 |
| cg19551912 | -13.49 | 6.05  | 2.59E-02 | -21.78 | 11.90 | 6.72E-02 | -13.62  | 25.40  | 5.92E-01 | -10.50 | 8.05  | 1.92E-01 | -9.58   | 17.55 | 5.85E-01 |
| cg05340094 | -9.26  | 4.16  | 2.59E-02 | -4.33  | 7.41  | 5.59E-01 | -8.47   | 10.46  | 4.18E-01 | -17.23 | 7.04  | 1.43E-02 | -3.05   | 9.85  | 7.57E-01 |
| cg15458222 | 11.17  | 5.01  | 2.59E-02 | 22.52  | 8.62  | 8.99E-03 | -0.13   | 14.70  | 9.93E-01 | 9.61   | 6.96  | 1.67E-01 | -1.75   | 14.31 | 9.03E-01 |
| cg26937038 | 15.74  | 7.07  | 2.59E-02 | 22.24  | 9.55  | 1.99E-02 | 26.51   | 19.10  | 1.65E-01 | -1.83  | 21.40 | 9.32E-01 | 0.69    | 15.54 | 9.65E-01 |
| cg24403804 | 8.63   | 3.87  | 2.59E-02 | 9.49   | 5.68  | 9.46E-02 | 6.13    | 11.28  | 5.87E-01 | 13.06  | 7.96  | 1.01E-01 | 2.20    | 9.12  | 8.10E-01 |
| cg06093354 | 36.28  | 16.29 | 2.59E-02 | 13.34  | 31.26 | 6.70E-01 | 67.63   | 174.02 | 6.98E-01 | 42.14  | 20.44 | 3.92E-02 | 62.71   | 56.00 | 2.63E-01 |
| cg01366419 | 16.11  | 7.23  | 2.59E-02 | 35.26  | 12.91 | 6.29E-03 | 7.81    | 17.31  | 6.52E-01 | 11.42  | 16.42 | 4.87E-01 | 6.62    | 11.67 | 5.71E-01 |
| cg08179898 | -40.07 | 17.99 | 2.59E-02 | -19.47 | 39.90 | 6.26E-01 | -240.71 | 177.82 | 1.76E-01 | -40.86 | 22.07 | 6.41E-02 | -53.28  | 51.45 | 3.00E-01 |
| cg13000082 | 24.40  | 10.95 | 2.59E-02 | 30.93  | 18.34 | 9.18E-02 | 20.46   | 31.04  | 5.10E-01 | 16.69  | 34.67 | 6.30E-01 | 21.86   | 16.92 | 1.96E-01 |
| cg08412537 | 8.73   | 3.92  | 2.59E-02 | 10.91  | 5.69  | 5.50E-02 | 13.06   | 8.18   | 1.10E-01 | -7.48  | 11.11 | 5.01E-01 | 8.66    | 9.50  | 3.62E-01 |
| cg07314821 | 21.83  | 9.80  | 2.59E-02 | 21.45  | 18.12 | 2.36E-01 | 35.11   | 20.30  | 8.37E-02 | 9.48   | 7.05  | 1.79E-01 | 62.69   | 28.50 | 2.78E-02 |
| cg17294928 | -42.96 | 19.28 | 2.59E-02 | -49.35 | 39.21 | 2.08E-01 | -13.65  | 128.59 | 9.15E-01 | -21.58 | 25.47 | 3.97E-01 | -112.95 | 47.85 | 1.83E-02 |

|            |        |       |          |        |       |          |        |        |          |        |        |          |         |       |          |
|------------|--------|-------|----------|--------|-------|----------|--------|--------|----------|--------|--------|----------|---------|-------|----------|
| cg00983912 | -14.99 | 6.73  | 2.59E-02 | -25.89 | 19.55 | 1.85E-01 | -20.98 | 35.68  | 5.57E-01 | -12.19 | 7.53   | 1.06E-01 | -30.28  | 30.77 | 3.25E-01 |
| cg06545019 | 18.04  | 8.10  | 2.59E-02 | 21.98  | 11.88 | 6.44E-02 | 18.10  | 20.08  | 3.67E-01 | 14.48  | 22.83  | 5.26E-01 | 12.41   | 16.30 | 4.47E-01 |
| cg08979737 | 19.00  | 8.53  | 2.59E-02 | 11.27  | 17.04 | 5.08E-01 | -0.40  | 34.35  | 9.91E-01 | 27.19  | 11.63  | 1.94E-02 | 10.48   | 22.04 | 6.34E-01 |
| cg10328220 | 24.04  | 10.79 | 2.59E-02 | 31.09  | 13.85 | 2.48E-02 | -8.76  | 35.53  | 8.05E-01 | 6.73   | 38.48  | 8.61E-01 | 24.50   | 22.91 | 2.85E-01 |
| cg10784143 | 19.39  | 8.71  | 2.59E-02 | 15.34  | 18.40 | 4.04E-01 | -11.27 | 35.11  | 7.48E-01 | 16.55  | 11.41  | 1.47E-01 | 52.98   | 23.93 | 2.68E-02 |
| cg17785786 | -16.35 | 7.34  | 2.59E-02 | -30.87 | 15.98 | 5.34E-02 | -33.24 | 49.90  | 5.05E-01 | -14.20 | 9.09   | 1.18E-01 | 1.32    | 21.70 | 9.51E-01 |
| cg27198696 | 9.80   | 4.40  | 2.59E-02 | 12.90  | 5.90  | 2.89E-02 | 10.91  | 9.99   | 2.74E-01 | 11.49  | 13.13  | 3.82E-01 | -5.59   | 11.84 | 6.37E-01 |
| cg21474257 | 20.68  | 9.28  | 2.59E-02 | 31.89  | 20.42 | 1.18E-01 | 44.18  | 23.44  | 5.94E-02 | 13.28  | 12.91  | 3.04E-01 | 2.41    | 26.85 | 9.28E-01 |
| cg14572581 | 27.56  | 12.37 | 2.59E-02 | 4.09   | 24.43 | 8.67E-01 | -67.54 | 85.92  | 4.32E-01 | 29.71  | 9.45   | 1.66E-03 | 65.72   | 30.62 | 3.18E-02 |
| cg23825522 | -19.25 | 8.64  | 2.59E-02 | -16.48 | 21.80 | 4.50E-01 | 47.25  | 46.28  | 3.07E-01 | -20.48 | 10.17  | 4.39E-02 | -41.14  | 29.63 | 1.65E-01 |
| cg07072366 | 18.28  | 8.21  | 2.59E-02 | 32.51  | 13.97 | 2.00E-02 | 16.26  | 20.02  | 4.17E-01 | 20.70  | 19.33  | 2.84E-01 | 1.94    | 14.82 | 8.96E-01 |
| cg13166171 | -15.80 | 7.09  | 2.59E-02 | -33.07 | 11.62 | 4.42E-03 | -9.69  | 12.57  | 4.41E-01 | -8.62  | 17.60  | 6.24E-01 | -4.18   | 13.77 | 7.62E-01 |
| cg10145533 | -6.01  | 2.70  | 2.59E-02 | -6.46  | 3.86  | 9.44E-02 | -8.19  | 8.42   | 3.31E-01 | -6.11  | 5.80   | 2.92E-01 | -3.61   | 6.16  | 5.58E-01 |
| cg14512089 | 98.39  | 44.18 | 2.59E-02 | 135.09 | 71.98 | 6.05E-02 | 38.08  | 261.61 | 8.84E-01 | 201.20 | 109.93 | 6.72E-02 | 32.12   | 67.13 | 6.32E-01 |
| cg03447699 | 6.52   | 2.93  | 2.59E-02 | 6.99   | 4.31  | 1.05E-01 | 6.00   | 6.40   | 3.48E-01 | 10.42  | 9.31   | 2.63E-01 | 4.39    | 6.09  | 4.71E-01 |
| cg22915906 | -16.56 | 7.44  | 2.59E-02 | -6.31  | 16.13 | 6.95E-01 | 6.33   | 27.16  | 8.16E-01 | -22.19 | 9.32   | 1.73E-02 | -20.57  | 26.87 | 4.44E-01 |
| cg09444036 | 16.75  | 7.52  | 2.60E-02 | 13.18  | 14.76 | 3.72E-01 | -23.16 | 35.71  | 5.17E-01 | 23.25  | 9.96   | 1.95E-02 | 8.68    | 21.25 | 6.83E-01 |
| cg27356296 | -8.61  | 3.87  | 2.60E-02 | -2.35  | 8.73  | 7.88E-01 | -23.33 | 14.48  | 1.07E-01 | -6.29  | 5.02   | 2.11E-01 | -19.71  | 10.33 | 5.63E-02 |
| cg12689425 | -18.78 | 8.43  | 2.60E-02 | -14.68 | 13.96 | 2.93E-01 | -34.51 | 35.19  | 3.27E-01 | -29.41 | 14.40  | 4.11E-02 | -5.76   | 17.41 | 7.41E-01 |
| cg24580185 | 52.36  | 23.51 | 2.60E-02 | 44.06  | 29.72 | 1.38E-01 | 129.17 | 165.84 | 4.36E-01 | 109.93 | 76.36  | 1.50E-01 | 45.41   | 46.20 | 3.26E-01 |
| cg12421138 | -10.64 | 4.78  | 2.60E-02 | -9.94  | 9.94  | 3.17E-01 | -19.59 | 14.30  | 1.71E-01 | -9.50  | 6.58   | 1.49E-01 | -8.82   | 13.21 | 5.04E-01 |
| cg13922669 | 13.21  | 5.93  | 2.60E-02 | 22.75  | 10.09 | 2.41E-02 | 9.11   | 16.85  | 5.89E-01 | 15.10  | 14.25  | 2.89E-01 | 4.46    | 9.94  | 6.53E-01 |
| cg27062215 | 9.60   | 4.31  | 2.60E-02 | 4.78   | 5.25  | 3.63E-01 | 13.22  | 8.16   | 1.05E-01 | 30.33  | 13.09  | 2.05E-02 | 6.22    | 8.16  | 4.46E-01 |
| cg25310241 | 36.79  | 16.52 | 2.60E-02 | 46.48  | 23.13 | 4.45E-02 | 44.45  | 46.28  | 3.37E-01 | 51.28  | 42.99  | 2.33E-01 | -0.75   | 35.65 | 9.83E-01 |
| cg13555772 | 11.25  | 5.05  | 2.60E-02 | 11.17  | 7.11  | 1.17E-01 | 5.68   | 12.15  | 6.40E-01 | 16.86  | 12.90  | 1.91E-01 | 12.10   | 12.26 | 3.24E-01 |
| cg08454455 | 17.39  | 7.81  | 2.60E-02 | 20.49  | 12.04 | 8.89E-02 | -13.16 | 19.81  | 5.06E-01 | 28.79  | 15.20  | 5.82E-02 | 20.08   | 18.84 | 2.86E-01 |
| cg16560847 | -13.56 | 6.09  | 2.60E-02 | -21.88 | 10.17 | 3.15E-02 | -9.99  | 14.96  | 5.04E-01 | -5.66  | 11.80  | 6.31E-01 | -12.19  | 13.29 | 3.59E-01 |
| cg01725586 | 27.23  | 12.23 | 2.60E-02 | -11.77 | 29.40 | 6.89E-01 | 2.48   | 65.99  | 9.70E-01 | 35.31  | 14.75  | 1.67E-02 | 46.70   | 37.73 | 2.16E-01 |
| cg20087221 | 46.30  | 20.79 | 2.60E-02 | 59.68  | 26.97 | 2.69E-02 | -26.64 | 84.78  | 7.53E-01 | 39.84  | 45.95  | 3.86E-01 | 30.40   | 55.41 | 5.83E-01 |
| cg08626888 | 18.26  | 8.20  | 2.60E-02 | 29.92  | 12.24 | 1.45E-02 | 53.75  | 38.65  | 1.64E-01 | 7.38   | 6.24   | 2.37E-01 | 27.40   | 21.84 | 2.10E-01 |
| cg12321011 | 16.63  | 7.47  | 2.60E-02 | 29.80  | 18.63 | 1.10E-01 | -6.46  | 23.74  | 7.86E-01 | 16.63  | 9.10   | 6.76E-02 | 19.21   | 28.96 | 5.07E-01 |
| cg21129006 | -9.00  | 4.04  | 2.60E-02 | -10.51 | 7.34  | 1.53E-01 | -0.84  | 11.59  | 9.43E-01 | -6.03  | 6.23   | 3.33E-01 | -20.63  | 10.31 | 4.54E-02 |
| cg19716038 | -10.68 | 4.80  | 2.60E-02 | -9.81  | 9.79  | 3.16E-01 | -7.95  | 16.63  | 6.33E-01 | -13.50 | 6.27   | 3.13E-02 | 2.55    | 15.82 | 8.72E-01 |
| cg16788322 | 23.65  | 10.62 | 2.60E-02 | 30.07  | 16.37 | 6.63E-02 | 14.31  | 38.20  | 7.08E-01 | 14.22  | 27.72  | 6.08E-01 | 21.97   | 17.83 | 2.18E-01 |
| cg16536399 | -66.46 | 29.85 | 2.60E-02 | -41.96 | 41.56 | 3.13E-01 | -60.39 | 169.51 | 7.22E-01 | -67.45 | 59.38  | 2.56E-01 | -129.23 | 66.68 | 5.26E-02 |

|            |        |       |          |        |       |          |        |        |          |        |       |          |        |       |          |
|------------|--------|-------|----------|--------|-------|----------|--------|--------|----------|--------|-------|----------|--------|-------|----------|
| cg04851044 | 27.29  | 12.26 | 2.60E-02 | 58.32  | 17.06 | 6.32E-04 | 33.25  | 24.17  | 1.69E-01 | 14.41  | 7.12  | 4.30E-02 | 4.71   | 26.47 | 8.59E-01 |
| cg04027916 | -31.22 | 14.02 | 2.60E-02 | -42.10 | 18.46 | 2.26E-02 | -54.83 | 37.03  | 1.39E-01 | -16.28 | 48.83 | 7.39E-01 | 11.52  | 31.59 | 7.15E-01 |
| cg00712050 | -11.15 | 5.01  | 2.60E-02 | -9.76  | 7.49  | 1.92E-01 | -1.11  | 11.18  | 9.21E-01 | -15.56 | 15.76 | 3.23E-01 | -19.84 | 9.98  | 4.69E-02 |
| cg08903465 | -16.88 | 7.58  | 2.60E-02 | -30.71 | 12.45 | 1.36E-02 | -10.11 | 17.72  | 5.68E-01 | -2.46  | 18.35 | 8.93E-01 | -11.68 | 14.46 | 4.19E-01 |
| cg11063170 | 7.34   | 3.30  | 2.60E-02 | 6.29   | 7.36  | 3.92E-01 | 17.24  | 11.30  | 1.27E-01 | 6.74   | 4.18  | 1.07E-01 | 4.56   | 10.81 | 6.73E-01 |
| cg23143313 | -7.76  | 3.49  | 2.60E-02 | -6.90  | 5.14  | 1.79E-01 | 1.64   | 9.54   | 8.64E-01 | -9.13  | 7.97  | 2.52E-01 | -14.23 | 7.52  | 5.84E-02 |
| cg13487334 | 17.73  | 7.97  | 2.60E-02 | 11.78  | 15.71 | 4.53E-01 | 16.44  | 18.01  | 3.61E-01 | 17.44  | 12.17 | 1.52E-01 | 33.73  | 23.07 | 1.44E-01 |
| cg23451821 | 14.45  | 6.49  | 2.60E-02 | 29.39  | 13.20 | 2.60E-02 | 6.08   | 29.22  | 8.35E-01 | 9.72   | 8.16  | 2.33E-01 | 11.77  | 23.67 | 6.19E-01 |
| cg23803206 | 8.77   | 3.94  | 2.60E-02 | 4.91   | 6.31  | 4.37E-01 | 9.40   | 8.62   | 2.76E-01 | 13.40  | 8.45  | 1.13E-01 | 10.75  | 9.17  | 2.41E-01 |
| cg03483330 | -9.28  | 4.17  | 2.60E-02 | -15.82 | 8.63  | 6.69E-02 | 5.31   | 11.43  | 6.42E-01 | -9.40  | 6.36  | 1.39E-01 | -11.08 | 9.23  | 2.30E-01 |
| cg12984636 | -10.47 | 4.70  | 2.60E-02 | -9.35  | 12.02 | 4.37E-01 | 19.67  | 22.21  | 3.76E-01 | -12.32 | 5.69  | 3.04E-02 | -12.60 | 13.58 | 3.54E-01 |
| cg17011300 | 15.55  | 6.98  | 2.60E-02 | 14.46  | 13.90 | 2.98E-01 | 10.94  | 22.98  | 6.34E-01 | 13.57  | 9.44  | 1.51E-01 | 31.98  | 21.22 | 1.32E-01 |
| cg00036137 | 13.88  | 6.24  | 2.60E-02 | 12.70  | 12.49 | 3.09E-01 | 20.56  | 15.69  | 1.90E-01 | 7.74   | 6.73  | 2.50E-01 | 47.53  | 21.34 | 2.59E-02 |
| cg13180678 | -32.06 | 14.40 | 2.60E-02 | -6.19  | 46.23 | 8.93E-01 | 114.65 | 226.16 | 6.12E-01 | -41.57 | 15.90 | 8.92E-03 | 28.21  | 51.57 | 5.84E-01 |
| cg03127898 | 8.38   | 3.76  | 2.60E-02 | 6.80   | 5.01  | 1.75E-01 | 11.45  | 8.97   | 2.01E-01 | 6.45   | 10.63 | 5.44E-01 | 12.71  | 10.25 | 2.15E-01 |
| cg00926926 | 20.81  | 9.35  | 2.60E-02 | -0.58  | 22.32 | 9.79E-01 | 24.51  | 28.08  | 3.83E-01 | 20.59  | 11.78 | 8.07E-02 | 62.30  | 32.24 | 5.34E-02 |
| cg01863398 | 21.94  | 9.86  | 2.60E-02 | 49.35  | 20.26 | 1.49E-02 | 4.07   | 42.65  | 9.24E-01 | 10.89  | 12.09 | 3.68E-01 | 36.75  | 31.23 | 2.39E-01 |
| cg16801267 | 21.31  | 9.57  | 2.60E-02 | 12.96  | 29.10 | 6.56E-01 | 89.03  | 114.01 | 4.35E-01 | 23.40  | 10.71 | 2.89E-02 | 6.72   | 32.77 | 8.37E-01 |
| cg03909081 | 15.50  | 6.96  | 2.60E-02 | 15.71  | 19.19 | 4.13E-01 | -3.20  | 21.30  | 8.81E-01 | 16.56  | 8.50  | 5.15E-02 | 29.34  | 23.07 | 2.03E-01 |
| cg04751358 | -8.60  | 3.87  | 2.60E-02 | -11.90 | 8.90  | 1.81E-01 | -9.36  | 21.20  | 6.59E-01 | -8.34  | 4.67  | 7.41E-02 | -3.57  | 12.74 | 7.80E-01 |
| cg13620439 | -12.24 | 5.50  | 2.60E-02 | -10.24 | 10.15 | 3.13E-01 | 1.42   | 15.31  | 9.26E-01 | -14.89 | 8.59  | 8.29E-02 | -19.83 | 13.46 | 1.41E-01 |
| cg02300825 | 41.93  | 18.84 | 2.60E-02 | 35.09  | 27.95 | 2.09E-01 | 25.01  | 163.79 | 8.79E-01 | 52.53  | 35.45 | 1.38E-01 | 43.30  | 37.68 | 2.51E-01 |
| cg14397171 | -12.81 | 5.75  | 2.60E-02 | -13.24 | 8.65  | 1.26E-01 | -5.57  | 15.33  | 7.17E-01 | -28.79 | 15.80 | 6.84E-02 | -8.25  | 10.81 | 4.45E-01 |
| cg00545804 | 21.00  | 9.44  | 2.60E-02 | -4.10  | 31.18 | 8.96E-01 | -16.09 | 52.44  | 7.59E-01 | 28.25  | 10.69 | 8.23E-03 | -1.17  | 30.30 | 9.69E-01 |
| cg24856673 | 5.72   | 2.57  | 2.60E-02 | 5.27   | 3.70  | 1.55E-01 | 5.38   | 5.28   | 3.08E-01 | 14.29  | 7.36  | 5.23E-02 | 1.03   | 6.44  | 8.74E-01 |
| cg12313535 | 15.37  | 6.91  | 2.61E-02 | 11.79  | 15.76 | 4.54E-01 | 39.98  | 18.77  | 3.31E-02 | 9.86   | 8.91  | 2.69E-01 | 24.74  | 25.85 | 3.39E-01 |
| cg26146390 | 18.30  | 8.22  | 2.61E-02 | 11.12  | 18.78 | 5.54E-01 | -3.54  | 48.45  | 9.42E-01 | 22.52  | 9.88  | 2.26E-02 | 7.60   | 27.99 | 7.86E-01 |
| cg09322605 | 13.37  | 6.01  | 2.61E-02 | 18.85  | 12.93 | 1.45E-01 | -4.82  | 18.10  | 7.90E-01 | 10.03  | 8.34  | 2.29E-01 | 29.87  | 15.27 | 5.04E-02 |
| cg12195695 | -27.12 | 12.19 | 2.61E-02 | -30.83 | 14.31 | 3.12E-02 | 23.43  | 32.08  | 4.65E-01 | -61.46 | 44.99 | 1.72E-01 | -36.92 | 23.40 | 1.15E-01 |
| cg21670717 | -12.97 | 5.83  | 2.61E-02 | -17.58 | 10.27 | 8.69E-02 | 1.51   | 19.14  | 9.37E-01 | -6.70  | 4.76  | 1.59E-01 | -30.00 | 11.42 | 8.63E-03 |
| cg19084628 | -43.02 | 19.33 | 2.61E-02 | -56.74 | 26.50 | 3.23E-02 | 33.13  | 67.75  | 6.25E-01 | -53.39 | 42.84 | 2.13E-01 | -25.46 | 45.22 | 5.73E-01 |
| cg03370752 | 5.66   | 2.54  | 2.61E-02 | 4.60   | 3.25  | 1.57E-01 | 14.27  | 6.53   | 2.89E-02 | 6.50   | 7.20  | 3.67E-01 | -1.18  | 7.60  | 8.77E-01 |
| cg26873439 | -23.71 | 10.65 | 2.61E-02 | -24.81 | 16.24 | 1.27E-01 | -30.60 | 42.30  | 4.70E-01 | -36.11 | 17.89 | 4.35E-02 | 11.37  | 27.38 | 6.78E-01 |
| cg27109748 | -10.88 | 4.89  | 2.61E-02 | -9.84  | 6.85  | 1.51E-01 | 1.18   | 12.97  | 9.27E-01 | -12.80 | 14.19 | 3.67E-01 | -19.70 | 10.22 | 5.39E-02 |
| cg01662334 | 11.55  | 5.19  | 2.61E-02 | 19.52  | 10.97 | 7.52E-02 | 13.02  | 13.95  | 3.51E-01 | 11.67  | 6.89  | 9.03E-02 | -17.51 | 19.51 | 3.69E-01 |



|                 |        |       |          |        |       |          |        |        |          |        |       |          |        |       |          |
|-----------------|--------|-------|----------|--------|-------|----------|--------|--------|----------|--------|-------|----------|--------|-------|----------|
| cg17462107      | -12.39 | 5.57  | 2.61E-02 | -28.96 | 12.99 | 2.58E-02 | -2.56  | 22.75  | 9.10E-01 | -6.93  | 5.52  | 2.09E-01 | -24.61 | 15.95 | 1.23E-01 |
| cg14102811      | 31.08  | 13.97 | 2.61E-02 | -3.86  | 32.56 | 9.06E-01 | -62.15 | 120.40 | 6.06E-01 | 42.62  | 16.95 | 1.19E-02 | 29.85  | 39.70 | 4.52E-01 |
| cg04771206      | 17.31  | 7.78  | 2.61E-02 | 22.56  | 17.06 | 1.86E-01 | 20.47  | 38.24  | 5.93E-01 | 17.05  | 9.49  | 7.23E-02 | 3.95   | 27.83 | 8.87E-01 |
| cg17526513      | -29.23 | 13.14 | 2.61E-02 | -41.34 | 18.21 | 2.32E-02 | -15.20 | 39.36  | 6.99E-01 | -8.96  | 31.75 | 7.78E-01 | -22.82 | 29.59 | 4.41E-01 |
| cg05626128      | 13.08  | 5.88  | 2.61E-02 | 10.39  | 8.14  | 2.02E-01 | 19.53  | 13.19  | 1.39E-01 | 17.66  | 16.74 | 2.91E-01 | 10.25  | 14.82 | 4.89E-01 |
| cg10330019      | 27.51  | 12.36 | 2.61E-02 | 35.50  | 18.44 | 5.43E-02 | 56.00  | 39.81  | 1.60E-01 | 5.93   | 35.76 | 8.68E-01 | 16.28  | 21.37 | 4.46E-01 |
| cg13284614      | 36.41  | 16.36 | 2.61E-02 | 41.07  | 22.19 | 6.42E-02 | 51.41  | 58.21  | 3.77E-01 | -27.52 | 51.61 | 5.94E-01 | 46.19  | 31.11 | 1.38E-01 |
| cg00244517      | 15.51  | 6.97  | 2.61E-02 | 12.79  | 14.70 | 3.84E-01 | 18.03  | 11.96  | 1.32E-01 | 8.55   | 12.70 | 5.01E-01 | 29.32  | 19.03 | 1.23E-01 |
| cg25521400      | 6.33   | 2.84  | 2.61E-02 | 6.01   | 3.67  | 1.01E-01 | 8.63   | 7.09   | 2.24E-01 | 12.78  | 9.13  | 1.62E-01 | 0.60   | 7.60  | 9.37E-01 |
| cg08070022      | 12.82  | 5.76  | 2.61E-02 | 12.71  | 6.37  | 4.58E-02 | 19.25  | 15.88  | 2.26E-01 | 52.39  | 26.74 | 5.01E-02 | 1.82   | 11.36 | 8.73E-01 |
| cg09698471      | 12.67  | 5.69  | 2.61E-02 | 18.60  | 9.96  | 6.18E-02 | 11.89  | 16.34  | 4.67E-01 | 13.78  | 10.52 | 1.90E-01 | 4.28   | 11.20 | 7.02E-01 |
| cg02086839      | 10.28  | 4.62  | 2.61E-02 | 3.44   | 5.21  | 5.09E-01 | 12.37  | 9.19   | 1.78E-01 | 26.30  | 14.70 | 7.36E-02 | 18.52  | 9.99  | 6.37E-02 |
| cg15578948      | -47.90 | 21.53 | 2.61E-02 | -50.10 | 26.42 | 5.79E-02 | 170.03 | 162.92 | 2.97E-01 | -7.22  | 67.33 | 9.15E-01 | -77.97 | 46.30 | 9.22E-02 |
| cg00921097      | -11.44 | 5.14  | 2.61E-02 | -15.83 | 7.36  | 3.14E-02 | -12.13 | 12.35  | 3.26E-01 | -13.72 | 16.86 | 4.16E-01 | -1.34  | 10.38 | 8.97E-01 |
| cg07462863      | -8.66  | 3.89  | 2.61E-02 | -15.28 | 7.05  | 3.02E-02 | -3.81  | 10.65  | 7.21E-01 | -2.79  | 5.93  | 6.38E-01 | -17.56 | 10.78 | 1.03E-01 |
| cg27246991      | 29.48  | 13.25 | 2.61E-02 | 28.48  | 19.99 | 1.54E-01 | 27.03  | 31.71  | 3.94E-01 | 0.85   | 32.49 | 9.79E-01 | 55.12  | 28.28 | 5.13E-02 |
| cg23709231      | -15.54 | 6.99  | 2.61E-02 | -22.03 | 10.63 | 3.82E-02 | -7.56  | 15.26  | 6.20E-01 | -3.00  | 21.02 | 8.86E-01 | -16.57 | 14.02 | 2.37E-01 |
| cg01845501      | -9.51  | 4.28  | 2.61E-02 | -5.65  | 6.37  | 3.75E-01 | -15.17 | 10.00  | 1.29E-01 | -2.36  | 8.86  | 7.90E-01 | -23.29 | 10.44 | 2.57E-02 |
| cg08081805      | 17.42  | 7.83  | 2.61E-02 | 5.63   | 17.72 | 7.51E-01 | 101.32 | 124.26 | 4.15E-01 | 17.59  | 9.16  | 5.47E-02 | 44.11  | 29.79 | 1.39E-01 |
| cg23620889      | 30.98  | 13.93 | 2.61E-02 | 44.67  | 20.37 | 2.83E-02 | 18.19  | 29.62  | 5.39E-01 | -4.20  | 42.79 | 9.22E-01 | 31.75  | 30.72 | 3.01E-01 |
| cg19006127      | -32.46 | 14.59 | 2.61E-02 | -47.45 | 19.03 | 1.26E-02 | -50.95 | 46.16  | 2.70E-01 | -27.72 | 60.34 | 6.46E-01 | 8.50   | 28.98 | 7.69E-01 |
| cg18041814      | -9.25  | 4.16  | 2.61E-02 | -16.41 | 7.48  | 2.83E-02 | -8.13  | 11.16  | 4.66E-01 | -6.54  | 6.24  | 2.95E-01 | -1.34  | 12.68 | 9.16E-01 |
| cg13743500      | 19.05  | 8.56  | 2.61E-02 | 17.58  | 11.33 | 1.21E-01 | 24.52  | 22.25  | 2.71E-01 | -10.13 | 37.24 | 7.86E-01 | 25.95  | 17.94 | 1.48E-01 |
| cg05036937      | -12.37 | 5.56  | 2.61E-02 | -16.32 | 14.62 | 2.64E-01 | -40.67 | 27.43  | 1.38E-01 | -9.51  | 6.54  | 1.46E-01 | -16.10 | 18.41 | 3.82E-01 |
| cg07139165      | 15.22  | 6.84  | 2.61E-02 | -3.17  | 15.32 | 8.36E-01 | 33.65  | 29.36  | 2.52E-01 | 19.62  | 8.65  | 2.33E-02 | 14.48  | 19.67 | 4.62E-01 |
| cg05495155      | 44.92  | 20.19 | 2.61E-02 | 36.10  | 27.18 | 1.84E-01 | 57.21  | 115.10 | 6.19E-01 | 4.02   | 61.18 | 9.48E-01 | 73.92  | 36.36 | 4.21E-02 |
| cg00370820      | 12.38  | 5.56  | 2.61E-02 | 12.81  | 14.63 | 3.81E-01 | 24.38  | 25.12  | 3.32E-01 | 13.23  | 6.47  | 4.11E-02 | -6.52  | 21.39 | 7.60E-01 |
| cg03030665      | 23.08  | 10.37 | 2.61E-02 | 25.00  | 19.97 | 2.11E-01 | 15.45  | 19.02  | 4.16E-01 | 28.89  | 19.64 | 1.41E-01 | 23.92  | 26.46 | 3.66E-01 |
| cg01295264      | 15.63  | 7.03  | 2.61E-02 | 11.15  | 10.56 | 2.91E-01 | 23.92  | 12.61  | 5.79E-02 | -10.25 | 22.50 | 6.49E-01 | 28.65  | 18.20 | 1.15E-01 |
| cg27206903      | 13.45  | 6.04  | 2.61E-02 | 12.85  | 10.16 | 2.06E-01 | 9.62   | 10.16  | 3.43E-01 | 14.84  | 12.01 | 2.17E-01 | 44.55  | 30.64 | 1.46E-01 |
| cg18769353      | 19.26  | 8.66  | 2.61E-02 | 14.44  | 10.84 | 1.83E-01 | 31.58  | 26.37  | 2.31E-01 | 62.28  | 38.29 | 1.04E-01 | 17.05  | 19.21 | 3.75E-01 |
| cg09383816      | -35.15 | 15.80 | 2.61E-02 | -21.82 | 20.20 | 2.80E-01 | -18.51 | 59.10  | 7.54E-01 | -40.50 | 67.52 | 5.49E-01 | -69.70 | 30.87 | 2.40E-02 |
| cg12333043      | -8.42  | 3.79  | 2.61E-02 | -8.38  | 7.32  | 2.53E-01 | -0.33  | 13.82  | 9.81E-01 | -8.63  | 5.23  | 9.92E-02 | -12.22 | 10.33 | 2.37E-01 |
| cg17183531      | 16.71  | 7.51  | 2.61E-02 | 13.69  | 11.92 | 2.51E-01 | 7.14   | 14.04  | 6.11E-01 | 26.05  | 19.98 | 1.92E-01 | 31.75  | 17.99 | 7.75E-02 |
| ch.19.21460585R | -22.57 | 10.15 | 2.61E-02 | -26.97 | 12.97 | 3.75E-02 | -19.21 | 25.94  | 4.59E-01 | 29.90  | 43.71 | 4.94E-01 | -26.16 | 23.87 | 2.73E-01 |

|            |        |       |          |        |       |          |        |        |          |        |       |          |        |       |          |
|------------|--------|-------|----------|--------|-------|----------|--------|--------|----------|--------|-------|----------|--------|-------|----------|
| cg21862081 | -8.93  | 4.01  | 2.61E-02 | -13.49 | 6.39  | 3.48E-02 | -7.25  | 9.86   | 4.62E-01 | 1.82   | 9.42  | 8.47E-01 | -10.61 | 7.91  | 1.80E-01 |
| cg04613133 | -44.52 | 20.02 | 2.61E-02 | -39.06 | 25.01 | 1.18E-01 | -70.93 | 82.97  | 3.93E-01 | 2.70   | 83.09 | 9.74E-01 | -63.83 | 40.60 | 1.16E-01 |
| cg10228777 | 22.34  | 10.04 | 2.61E-02 | 16.42  | 36.56 | 6.53E-01 | 112.66 | 114.51 | 3.25E-01 | 20.91  | 10.83 | 5.36E-02 | 39.37  | 41.91 | 3.48E-01 |
| cg24427660 | 6.38   | 2.87  | 2.61E-02 | 6.04   | 3.47  | 8.22E-02 | 14.36  | 8.30   | 8.34E-02 | 1.26   | 9.91  | 8.99E-01 | 3.83   | 8.44  | 6.50E-01 |
| cg00336475 | -12.70 | 5.71  | 2.61E-02 | -27.45 | 11.89 | 2.09E-02 | 3.98   | 14.68  | 7.87E-01 | -11.96 | 7.79  | 1.25E-01 | -6.70  | 20.09 | 7.39E-01 |
| cg24135112 | 29.31  | 13.18 | 2.62E-02 | -19.04 | 43.49 | 6.62E-01 | 21.94  | 156.06 | 8.88E-01 | 31.66  | 14.35 | 2.74E-02 | 72.99  | 54.95 | 1.84E-01 |
| cg02647874 | 7.92   | 3.56  | 2.62E-02 | 8.59   | 5.37  | 1.09E-01 | 9.36   | 7.41   | 2.06E-01 | 2.30   | 10.94 | 8.33E-01 | 7.77   | 7.55  | 3.03E-01 |
| cg23104436 | -11.51 | 5.18  | 2.62E-02 | -27.48 | 13.95 | 4.89E-02 | 15.28  | 22.37  | 4.95E-01 | -9.59  | 6.13  | 1.18E-01 | -17.89 | 16.77 | 2.86E-01 |
| cg06030166 | -32.66 | 14.69 | 2.62E-02 | -0.59  | 38.23 | 9.88E-01 | 203.75 | 200.27 | 3.09E-01 | -37.78 | 16.71 | 2.38E-02 | -60.28 | 53.86 | 2.63E-01 |
| cg00424286 | -8.22  | 3.70  | 2.62E-02 | -9.57  | 6.39  | 1.34E-01 | -14.73 | 10.40  | 1.56E-01 | -5.67  | 5.76  | 3.25E-01 | -6.48  | 10.42 | 5.34E-01 |
| cg06803184 | -36.41 | 16.37 | 2.62E-02 | -36.81 | 18.23 | 4.35E-02 | -81.23 | 68.15  | 2.33E-01 | 41.20  | 93.15 | 6.58E-01 | -31.52 | 50.55 | 5.33E-01 |
| cg04750421 | -9.38  | 4.22  | 2.62E-02 | -11.60 | 6.30  | 6.56E-02 | -6.23  | 10.81  | 5.64E-01 | -12.01 | 9.44  | 2.03E-01 | -4.15  | 9.43  | 6.60E-01 |
| cg11478024 | 4.88   | 2.19  | 2.62E-02 | 3.40   | 2.93  | 2.46E-01 | 8.90   | 5.09   | 8.02E-02 | 5.58   | 5.77  | 3.33E-01 | 4.71   | 6.70  | 4.82E-01 |
| cg17863681 | -8.03  | 3.61  | 2.62E-02 | -12.49 | 4.91  | 1.10E-02 | -2.93  | 8.62   | 7.34E-01 | -1.82  | 17.39 | 9.17E-01 | -2.83  | 7.36  | 7.00E-01 |
| cg07575519 | -14.78 | 6.65  | 2.62E-02 | -32.98 | 10.30 | 1.37E-03 | -6.60  | 17.83  | 7.11E-01 | -7.35  | 5.83  | 2.07E-01 | -12.43 | 12.76 | 3.30E-01 |
| cg03229538 | -16.01 | 7.20  | 2.62E-02 | -10.27 | 16.07 | 5.23E-01 | 1.77   | 31.21  | 9.55E-01 | -20.08 | 8.80  | 2.25E-02 | -7.77  | 26.03 | 7.65E-01 |
| cg03407228 | -12.77 | 5.74  | 2.62E-02 | -6.17  | 8.19  | 4.52E-01 | -15.99 | 13.00  | 2.19E-01 | -36.00 | 16.13 | 2.56E-02 | -11.00 | 13.29 | 4.08E-01 |
| cg06926146 | 17.79  | 8.00  | 2.62E-02 | 34.54  | 14.56 | 1.77E-02 | 21.51  | 26.06  | 4.09E-01 | -1.03  | 16.43 | 9.50E-01 | 15.20  | 13.21 | 2.50E-01 |
| cg27312255 | -10.83 | 4.87  | 2.62E-02 | 1.61   | 13.74 | 9.07E-01 | -18.22 | 23.20  | 4.32E-01 | -14.28 | 5.59  | 1.07E-02 | 8.44   | 18.21 | 6.43E-01 |
| cg06438484 | -21.67 | 9.75  | 2.62E-02 | -14.91 | 15.03 | 3.21E-01 | -28.66 | 28.03  | 3.07E-01 | -6.03  | 27.03 | 8.23E-01 | -33.99 | 17.02 | 4.59E-02 |
| cg02432528 | 18.69  | 8.41  | 2.62E-02 | 18.42  | 9.15  | 4.41E-02 | 15.07  | 54.33  | 7.81E-01 | 29.01  | 47.09 | 5.38E-01 | 18.55  | 26.60 | 4.86E-01 |
| cg14118850 | 6.66   | 2.99  | 2.62E-02 | 5.45   | 3.91  | 1.63E-01 | 10.71  | 6.92   | 1.22E-01 | 9.54   | 9.58  | 3.19E-01 | 4.07   | 8.38  | 6.27E-01 |
| cg01133655 | -41.67 | 18.75 | 2.62E-02 | -34.71 | 27.80 | 2.12E-01 | 9.93   | 42.63  | 8.16E-01 | -94.73 | 42.18 | 2.47E-02 | -52.55 | 39.06 | 1.79E-01 |
| cg22904296 | 11.10  | 4.99  | 2.62E-02 | 8.39   | 6.85  | 2.21E-01 | 20.89  | 13.72  | 1.28E-01 | 25.78  | 16.36 | 1.15E-01 | 6.06   | 10.11 | 5.49E-01 |
| cg13648651 | 13.15  | 5.91  | 2.62E-02 | 2.88   | 14.77 | 8.45E-01 | 27.06  | 19.77  | 1.71E-01 | 14.09  | 7.11  | 4.75E-02 | 8.80   | 24.39 | 7.18E-01 |
| cg02705800 | 18.10  | 8.14  | 2.62E-02 | -19.48 | 35.13 | 5.79E-01 | 13.31  | 42.34  | 7.53E-01 | 23.18  | 8.84  | 8.71E-03 | -17.02 | 33.14 | 6.07E-01 |
| cg02609127 | 17.04  | 7.67  | 2.62E-02 | 51.02  | 24.90 | 4.05E-02 | 29.18  | 29.02  | 3.15E-01 | 18.16  | 9.25  | 4.95E-02 | 2.81   | 12.63 | 8.24E-01 |
| cg17099569 | -9.58  | 4.31  | 2.62E-02 | -10.55 | 6.96  | 1.30E-01 | -8.98  | 11.82  | 4.47E-01 | -3.57  | 4.42  | 4.19E-01 | -24.29 | 9.32  | 9.15E-03 |
| cg23732962 | 20.88  | 9.39  | 2.62E-02 | 15.40  | 17.78 | 3.86E-01 | 31.95  | 19.46  | 1.01E-01 | 13.46  | 16.28 | 4.08E-01 | 30.07  | 23.89 | 2.08E-01 |
| cg16617723 | 10.18  | 4.58  | 2.62E-02 | 17.92  | 6.63  | 6.90E-03 | 4.69   | 10.06  | 6.41E-01 | 2.24   | 14.13 | 8.74E-01 | 2.05   | 9.95  | 8.37E-01 |
| cg02069999 | 18.43  | 8.29  | 2.62E-02 | 15.16  | 8.69  | 8.10E-02 | -6.40  | 67.64  | 9.25E-01 | 62.28  | 67.13 | 3.54E-01 | 63.96  | 34.17 | 6.13E-02 |
| cg04272355 | -10.71 | 4.82  | 2.63E-02 | 0.64   | 10.27 | 9.50E-01 | -29.43 | 17.10  | 8.53E-02 | -13.44 | 6.61  | 4.20E-02 | -8.12  | 11.75 | 4.90E-01 |
| cg24851249 | -12.69 | 5.71  | 2.63E-02 | -12.43 | 8.15  | 1.28E-01 | -10.50 | 13.39  | 4.33E-01 | -23.75 | 17.43 | 1.73E-01 | -9.70  | 12.16 | 4.25E-01 |
| cg17841267 | -8.08  | 3.64  | 2.63E-02 | -9.75  | 4.83  | 4.36E-02 | -7.87  | 9.44   | 4.04E-01 | -4.15  | 11.01 | 7.06E-01 | -5.32  | 8.67  | 5.39E-01 |
| cg25163297 | 21.73  | 9.78  | 2.63E-02 | 8.69   | 17.00 | 6.09E-01 | 37.42  | 18.50  | 4.32E-02 | 15.37  | 19.58 | 4.32E-01 | 32.60  | 26.11 | 2.12E-01 |

|            |        |       |          |        |       |          |         |        |          |        |       |          |        |       |          |
|------------|--------|-------|----------|--------|-------|----------|---------|--------|----------|--------|-------|----------|--------|-------|----------|
| cg18077307 | 7.76   | 3.49  | 2.63E-02 | 7.20   | 4.70  | 1.25E-01 | 12.04   | 8.15   | 1.40E-01 | 7.01   | 11.77 | 5.51E-01 | 5.42   | 8.34  | 5.15E-01 |
| cg02311496 | 17.49  | 7.87  | 2.63E-02 | 23.22  | 14.51 | 1.10E-01 | 8.89    | 18.08  | 6.23E-01 | 10.24  | 14.95 | 4.93E-01 | 25.70  | 16.12 | 1.11E-01 |
| cg01310829 | 16.83  | 7.57  | 2.63E-02 | 20.34  | 15.76 | 1.97E-01 | 4.54    | 16.90  | 7.88E-01 | 20.79  | 14.11 | 1.41E-01 | 18.66  | 14.30 | 1.92E-01 |
| cg16809293 | -29.60 | 13.32 | 2.63E-02 | -35.28 | 22.04 | 1.10E-01 | 20.35   | 43.78  | 6.42E-01 | -18.35 | 25.90 | 4.79E-01 | -49.46 | 25.26 | 5.03E-02 |
| cg03999067 | -7.47  | 3.36  | 2.63E-02 | -6.14  | 6.43  | 3.40E-01 | -10.97  | 11.27  | 3.30E-01 | -9.15  | 4.70  | 5.17E-02 | -1.09  | 9.48  | 9.08E-01 |
| cg10257070 | -13.15 | 5.92  | 2.63E-02 | -16.21 | 11.63 | 1.64E-01 | -27.75  | 20.53  | 1.76E-01 | -13.56 | 7.96  | 8.86E-02 | 7.87   | 18.15 | 6.65E-01 |
| cg10982364 | 15.48  | 6.97  | 2.63E-02 | 41.21  | 16.60 | 1.30E-02 | 0.28    | 22.78  | 9.90E-01 | 12.80  | 8.84  | 1.48E-01 | 8.18   | 14.84 | 5.81E-01 |
| cg05844798 | 14.85  | 6.68  | 2.63E-02 | 19.20  | 10.40 | 6.49E-02 | 13.12   | 13.14  | 3.18E-01 | 18.67  | 17.49 | 2.86E-01 | 4.39   | 15.66 | 7.79E-01 |
| cg13745852 | 38.12  | 17.16 | 2.63E-02 | 23.17  | 21.09 | 2.72E-01 | 6.15    | 113.29 | 9.57E-01 | 91.95  | 53.34 | 8.47E-02 | 62.00  | 37.28 | 9.62E-02 |
| cg15225657 | -32.68 | 14.71 | 2.63E-02 | -6.18  | 28.56 | 8.29E-01 | -28.60  | 135.67 | 8.33E-01 | -45.51 | 17.89 | 1.10E-02 | 0.98   | 67.59 | 9.88E-01 |
| cg13546414 | 12.69  | 5.71  | 2.63E-02 | 20.96  | 9.43  | 2.62E-02 | 1.21    | 14.09  | 9.31E-01 | 20.75  | 12.69 | 1.02E-01 | 2.24   | 11.08 | 8.40E-01 |
| cg11581280 | -11.31 | 5.09  | 2.63E-02 | -13.63 | 9.81  | 1.65E-01 | -8.17   | 15.35  | 5.95E-01 | -8.64  | 7.23  | 2.32E-01 | -19.65 | 14.39 | 1.72E-01 |
| cg27131953 | -38.83 | 17.48 | 2.63E-02 | -12.56 | 26.74 | 6.39E-01 | 6.26    | 106.73 | 9.53E-01 | -40.49 | 34.80 | 2.45E-01 | -79.72 | 32.25 | 1.34E-02 |
| cg04975834 | 21.25  | 9.56  | 2.63E-02 | 19.42  | 14.96 | 1.94E-01 | 23.03   | 20.95  | 2.72E-01 | 4.80   | 24.32 | 8.44E-01 | 34.03  | 20.01 | 8.90E-02 |
| cg14572436 | 18.56  | 8.36  | 2.63E-02 | 15.31  | 15.11 | 3.11E-01 | -2.98   | 27.83  | 9.15E-01 | 18.69  | 11.92 | 1.17E-01 | 44.01  | 24.86 | 7.67E-02 |
| cg24477640 | 25.47  | 11.47 | 2.63E-02 | 25.78  | 20.82 | 2.16E-01 | 0.04    | 41.19  | 9.99E-01 | 25.81  | 16.22 | 1.12E-01 | 39.77  | 33.12 | 2.30E-01 |
| cg13787134 | 18.12  | 8.16  | 2.63E-02 | 36.52  | 20.69 | 7.75E-02 | 53.88   | 37.21  | 1.48E-01 | 10.26  | 9.59  | 2.85E-01 | 33.50  | 30.30 | 2.69E-01 |
| cg22529184 | -9.29  | 4.18  | 2.63E-02 | -11.09 | 9.55  | 2.46E-01 | -2.33   | 20.43  | 9.09E-01 | -7.06  | 5.22  | 1.76E-01 | -20.42 | 11.87 | 8.55E-02 |
| cg08992360 | 25.40  | 11.43 | 2.63E-02 | 26.85  | 15.79 | 8.91E-02 | 23.44   | 34.06  | 4.91E-01 | 54.16  | 28.76 | 5.97E-02 | 0.59   | 25.26 | 9.81E-01 |
| cg13948456 | 20.32  | 9.14  | 2.63E-02 | 15.32  | 12.52 | 2.21E-01 | 16.42   | 19.52  | 4.00E-01 | 25.06  | 31.94 | 4.33E-01 | 39.23  | 22.48 | 8.09E-02 |
| cg22932649 | -11.72 | 5.28  | 2.63E-02 | -9.52  | 11.07 | 3.90E-01 | -24.76  | 20.88  | 2.36E-01 | -9.65  | 6.92  | 1.63E-01 | -18.63 | 14.80 | 2.08E-01 |
| cg05672912 | 15.86  | 7.14  | 2.63E-02 | 11.41  | 9.44  | 2.27E-01 | 27.70   | 16.84  | 9.99E-02 | 56.60  | 30.22 | 6.11E-02 | 6.22   | 16.23 | 7.01E-01 |
| cg02381898 | 20.95  | 9.43  | 2.63E-02 | 26.68  | 15.04 | 7.62E-02 | 8.06    | 23.85  | 7.35E-01 | 44.43  | 26.64 | 9.54E-02 | 11.18  | 16.54 | 4.99E-01 |
| cg08452327 | -25.57 | 11.51 | 2.63E-02 | -16.80 | 13.93 | 2.28E-01 | -78.83  | 41.70  | 5.87E-02 | -49.53 | 63.30 | 4.34E-01 | -31.05 | 25.26 | 2.19E-01 |
| cg19643344 | 42.78  | 19.26 | 2.63E-02 | 99.26  | 60.81 | 1.03E-01 | -177.25 | 223.49 | 4.28E-01 | 37.59  | 21.24 | 7.68E-02 | 46.11  | 72.69 | 5.26E-01 |
| cg25062812 | 22.78  | 10.26 | 2.63E-02 | -27.64 | 38.71 | 4.75E-01 | -57.15  | 157.37 | 7.16E-01 | 25.60  | 10.94 | 1.93E-02 | 53.25  | 47.75 | 2.65E-01 |
| cg13690525 | 21.92  | 9.87  | 2.63E-02 | 55.27  | 19.43 | 4.44E-03 | 30.07   | 30.70  | 3.27E-01 | 11.44  | 8.01  | 1.53E-01 | 13.58  | 16.50 | 4.10E-01 |
| cg05730027 | 7.36   | 3.31  | 2.63E-02 | 7.37   | 4.68  | 1.15E-01 | 2.61    | 7.61   | 7.31E-01 | 1.09   | 12.95 | 9.33E-01 | 12.74  | 6.73  | 5.83E-02 |
| cg23903774 | -10.13 | 4.56  | 2.63E-02 | -9.94  | 9.44  | 2.92E-01 | -1.21   | 14.49  | 9.33E-01 | -9.10  | 6.35  | 1.52E-01 | -19.66 | 11.67 | 9.20E-02 |
| cg16364805 | -28.37 | 12.77 | 2.63E-02 | -37.40 | 15.49 | 1.58E-02 | 95.27   | 79.75  | 2.32E-01 | -28.45 | 39.61 | 4.73E-01 | -13.63 | 28.67 | 6.35E-01 |
| cg00075103 | -8.72  | 3.93  | 2.63E-02 | -15.12 | 8.16  | 6.39E-02 | -8.16   | 13.62  | 5.49E-01 | -4.78  | 5.48  | 3.83E-01 | -12.09 | 9.44  | 2.00E-01 |
| cg19978859 | -15.78 | 7.11  | 2.63E-02 | -32.87 | 18.11 | 6.95E-02 | -13.74  | 27.98  | 6.23E-01 | -14.46 | 8.59  | 9.22E-02 | 0.66   | 22.83 | 9.77E-01 |
| cg07154956 | 29.90  | 13.46 | 2.64E-02 | 49.13  | 38.19 | 1.98E-01 | -53.67  | 181.13 | 7.67E-01 | 25.62  | 14.96 | 8.67E-02 | 55.66  | 55.03 | 3.12E-01 |
| cg00280895 | 8.83   | 3.98  | 2.64E-02 | 11.08  | 6.02  | 6.55E-02 | 5.91    | 10.07  | 5.57E-01 | 0.16   | 10.44 | 9.88E-01 | 11.62  | 7.77  | 1.35E-01 |
| cg26065919 | 47.18  | 21.25 | 2.64E-02 | 21.40  | 18.41 | 2.45E-01 | 118.60  | 65.17  | 6.88E-02 | 129.92 | 60.38 | 3.14E-02 | 37.27  | 26.80 | 1.64E-01 |

|            |        |       |          |        |       |          |        |        |          |        |       |          |        |       |          |
|------------|--------|-------|----------|--------|-------|----------|--------|--------|----------|--------|-------|----------|--------|-------|----------|
| cg15507449 | -13.83 | 6.23  | 2.64E-02 | -15.24 | 12.25 | 2.13E-01 | -19.23 | 16.22  | 2.36E-01 | -12.14 | 9.19  | 1.87E-01 | -10.98 | 16.94 | 5.17E-01 |
| cg02852529 | -15.58 | 7.02  | 2.64E-02 | -10.80 | 15.90 | 4.97E-01 | -73.56 | 35.48  | 3.81E-02 | -15.24 | 8.66  | 7.86E-02 | -5.52  | 21.13 | 7.94E-01 |
| cg13679691 | 14.55  | 6.55  | 2.64E-02 | 18.43  | 10.45 | 7.77E-02 | 47.60  | 24.57  | 5.27E-02 | 9.05   | 10.07 | 3.69E-01 | 0.71   | 19.63 | 9.71E-01 |
| cg11814087 | 5.91   | 2.66  | 2.64E-02 | 4.15   | 3.52  | 2.38E-01 | 12.95  | 6.40   | 4.30E-02 | 6.50   | 6.98  | 3.51E-01 | 3.19   | 8.00  | 6.90E-01 |
| cg23456595 | -8.53  | 3.84  | 2.64E-02 | -10.64 | 4.95  | 3.15E-02 | -7.52  | 9.95   | 4.50E-01 | -0.50  | 12.38 | 9.68E-01 | -6.25  | 9.87  | 5.26E-01 |
| cg27560132 | -12.11 | 5.45  | 2.64E-02 | -33.57 | 16.70 | 4.44E-02 | -2.97  | 28.10  | 9.16E-01 | -9.09  | 6.16  | 1.40E-01 | -18.14 | 20.44 | 3.75E-01 |
| cg05374428 | -13.87 | 6.25  | 2.64E-02 | -20.32 | 9.45  | 3.16E-02 | -17.23 | 17.33  | 3.20E-01 | -16.22 | 12.51 | 1.95E-01 | 6.93   | 14.54 | 6.34E-01 |
| cg02150262 | -10.71 | 4.82  | 2.64E-02 | -11.46 | 8.14  | 1.59E-01 | -15.46 | 12.29  | 2.08E-01 | -4.66  | 9.50  | 6.24E-01 | -13.08 | 9.90  | 1.86E-01 |
| cg01023872 | -15.87 | 7.15  | 2.64E-02 | 3.53   | 15.21 | 8.17E-01 | -22.00 | 35.61  | 5.37E-01 | -20.02 | 8.98  | 2.58E-02 | -29.11 | 21.96 | 1.85E-01 |
| cg04880940 | 15.22  | 6.85  | 2.64E-02 | 5.64   | 16.32 | 7.30E-01 | 16.54  | 24.58  | 5.01E-01 | 20.52  | 8.32  | 1.37E-02 | -14.42 | 26.31 | 5.84E-01 |
| cg05042439 | -11.58 | 5.22  | 2.64E-02 | -22.49 | 14.73 | 1.27E-01 | -28.72 | 29.03  | 3.22E-01 | -7.68  | 5.98  | 1.99E-01 | -24.50 | 18.33 | 1.81E-01 |
| cg12794432 | -36.99 | 16.66 | 2.64E-02 | -46.68 | 20.04 | 1.98E-02 | 37.45  | 84.85  | 6.59E-01 | 26.59  | 65.95 | 6.87E-01 | -38.08 | 36.62 | 2.98E-01 |
| cg13692476 | 9.48   | 4.27  | 2.64E-02 | 1.15   | 7.33  | 8.75E-01 | 21.09  | 9.85   | 3.22E-02 | 8.64   | 8.22  | 2.94E-01 | 13.75  | 9.47  | 1.47E-01 |
| cg22184996 | 16.95  | 7.63  | 2.64E-02 | 31.42  | 17.10 | 6.61E-02 | 5.24   | 17.99  | 7.71E-01 | 14.10  | 14.93 | 3.45E-01 | 16.87  | 12.74 | 1.86E-01 |
| cg04605667 | 25.76  | 11.60 | 2.64E-02 | 26.60  | 13.92 | 5.60E-02 | 34.50  | 45.59  | 4.49E-01 | -17.65 | 60.21 | 7.69E-01 | 27.99  | 25.69 | 2.76E-01 |
| cg00560632 | 5.11   | 2.30  | 2.64E-02 | 7.11   | 4.43  | 1.09E-01 | -0.32  | 5.48   | 9.54E-01 | 6.70   | 3.62  | 6.40E-02 | 3.60   | 5.93  | 5.44E-01 |
| cg27255275 | 7.00   | 3.16  | 2.64E-02 | 7.91   | 4.10  | 5.39E-02 | 12.86  | 8.04   | 1.10E-01 | 0.04   | 9.75  | 9.97E-01 | 2.29   | 8.15  | 7.79E-01 |
| cg02844589 | -12.89 | 5.81  | 2.64E-02 | -25.13 | 7.87  | 1.40E-03 | -8.64  | 9.43   | 3.60E-01 | -4.42  | 16.67 | 7.91E-01 | -2.43  | 10.86 | 8.23E-01 |
| cg12542255 | 4.64   | 2.09  | 2.64E-02 | 3.45   | 3.45  | 3.17E-01 | 7.27   | 3.74   | 5.21E-02 | 3.48   | 6.11  | 5.68E-01 | 3.41   | 4.61  | 4.60E-01 |
| cg09740450 | -7.72  | 3.48  | 2.64E-02 | -8.99  | 5.03  | 7.41E-02 | -12.17 | 7.86   | 1.22E-01 | -5.97  | 10.21 | 5.59E-01 | -1.69  | 7.56  | 8.23E-01 |
| cg20222562 | 5.14   | 2.32  | 2.64E-02 | 4.82   | 3.18  | 1.29E-01 | 6.98   | 6.42   | 2.77E-01 | 8.62   | 5.12  | 9.19E-02 | -0.74  | 6.36  | 9.07E-01 |
| cg08732750 | 9.05   | 4.08  | 2.64E-02 | 12.74  | 5.75  | 2.67E-02 | 2.43   | 8.76   | 7.82E-01 | 16.37  | 14.27 | 2.51E-01 | 3.92   | 9.15  | 6.68E-01 |
| cg25012185 | 10.93  | 4.93  | 2.64E-02 | 18.25  | 8.03  | 2.30E-02 | 13.82  | 10.95  | 2.07E-01 | 3.42   | 11.35 | 7.63E-01 | 2.68   | 10.20 | 7.93E-01 |
| cg02610064 | -13.43 | 6.05  | 2.64E-02 | -12.99 | 9.46  | 1.70E-01 | -22.03 | 15.11  | 1.45E-01 | -23.69 | 13.33 | 7.56E-02 | 1.31   | 12.76 | 9.18E-01 |
| cg19740361 | 13.52  | 6.09  | 2.64E-02 | 6.36   | 12.21 | 6.03E-01 | -27.07 | 32.04  | 3.98E-01 | 17.10  | 7.65  | 2.54E-02 | 25.71  | 21.48 | 2.31E-01 |
| cg03510732 | -13.24 | 5.97  | 2.65E-02 | -28.06 | 9.33  | 2.64E-03 | -1.97  | 13.67  | 8.86E-01 | -10.02 | 8.70  | 2.50E-01 | -4.98  | 12.51 | 6.90E-01 |
| cg10376161 | 6.37   | 2.87  | 2.65E-02 | 4.76   | 3.62  | 1.89E-01 | 13.37  | 7.45   | 7.27E-02 | 6.89   | 8.74  | 4.31E-01 | 5.67   | 8.48  | 5.03E-01 |
| cg22688566 | 7.19   | 3.24  | 2.65E-02 | 6.18   | 4.37  | 1.57E-01 | 18.51  | 9.07   | 4.13E-02 | 8.02   | 7.31  | 2.73E-01 | -1.18  | 9.14  | 8.98E-01 |
| cg13120771 | -40.38 | 18.20 | 2.65E-02 | -48.60 | 21.88 | 2.63E-02 | -54.03 | 63.33  | 3.94E-01 | -23.98 | 64.30 | 7.09E-01 | -2.62  | 47.70 | 9.56E-01 |
| cg14628354 | 17.46  | 7.87  | 2.65E-02 | 2.01   | 22.52 | 9.29E-01 | 35.08  | 53.33  | 5.11E-01 | 18.59  | 8.85  | 3.58E-02 | 26.68  | 30.51 | 3.82E-01 |
| cg09122158 | 19.79  | 8.92  | 2.65E-02 | 25.07  | 10.09 | 1.29E-02 | -46.27 | 73.59  | 5.29E-01 | 38.79  | 62.37 | 5.34E-01 | 0.48   | 20.81 | 9.82E-01 |
| cg21182715 | -12.13 | 5.47  | 2.65E-02 | -28.64 | 12.37 | 2.06E-02 | -5.03  | 14.10  | 7.21E-01 | -8.30  | 7.71  | 2.82E-01 | -10.64 | 14.04 | 4.49E-01 |
| cg16782493 | 23.75  | 10.70 | 2.65E-02 | 26.75  | 20.12 | 1.84E-01 | 58.04  | 40.55  | 1.52E-01 | 10.54  | 10.48 | 3.15E-01 | 56.74  | 27.23 | 3.72E-02 |
| cg02390637 | 11.85  | 5.34  | 2.65E-02 | 12.78  | 6.95  | 6.59E-02 | 12.00  | 12.56  | 3.40E-01 | 13.15  | 18.57 | 4.79E-01 | 7.17   | 13.92 | 6.07E-01 |
| cg09999441 | -35.43 | 15.96 | 2.65E-02 | -19.16 | 29.79 | 5.20E-01 | 75.99  | 212.57 | 7.21E-01 | -54.51 | 20.74 | 8.58E-03 | 16.85  | 47.09 | 7.21E-01 |

|            |        |       |          |        |       |          |         |        |          |        |       |          |        |       |          |
|------------|--------|-------|----------|--------|-------|----------|---------|--------|----------|--------|-------|----------|--------|-------|----------|
| cg15612947 | 6.83   | 3.08  | 2.65E-02 | 5.62   | 4.10  | 1.71E-01 | 12.12   | 8.45   | 1.51E-01 | 10.96  | 8.64  | 2.04E-01 | 3.77   | 7.32  | 6.07E-01 |
| cg25948982 | 9.95   | 4.49  | 2.65E-02 | 11.02  | 6.41  | 8.54E-02 | 16.60   | 13.35  | 2.14E-01 | 9.25   | 9.93  | 3.52E-01 | 4.10   | 10.21 | 6.88E-01 |
| cg21927420 | -22.46 | 10.12 | 2.65E-02 | -32.68 | 19.39 | 9.19E-02 | -34.60  | 43.35  | 4.25E-01 | -16.78 | 13.69 | 2.20E-01 | -19.74 | 28.44 | 4.88E-01 |
| cg06087962 | -25.75 | 11.60 | 2.65E-02 | -71.54 | 41.44 | 8.43E-02 | -167.53 | 159.11 | 2.92E-01 | -18.44 | 12.52 | 1.41E-01 | -59.83 | 48.66 | 2.19E-01 |
| cg08404225 | -8.41  | 3.79  | 2.65E-02 | -18.25 | 8.78  | 3.77E-02 | -4.86   | 12.99  | 7.08E-01 | -3.91  | 4.36  | 3.70E-01 | -17.42 | 9.84  | 7.67E-02 |
| cg24690709 | 13.06  | 5.89  | 2.65E-02 | 9.90   | 7.33  | 1.77E-01 | 13.61   | 16.38  | 4.06E-01 | 14.10  | 27.43 | 6.07E-01 | 23.73  | 13.87 | 8.71E-02 |
| cg17764008 | -35.88 | 16.17 | 2.65E-02 | -85.53 | 66.21 | 1.96E-01 | -188.70 | 219.29 | 3.90E-01 | -34.83 | 17.37 | 4.49E-02 | 6.33   | 61.89 | 9.19E-01 |
| cg23196831 | 11.25  | 5.07  | 2.65E-02 | 20.54  | 8.30  | 1.34E-02 | 9.55    | 15.47  | 5.37E-01 | 12.49  | 8.81  | 1.56E-01 | -2.39  | 9.88  | 8.09E-01 |
| cg05475107 | -8.49  | 3.83  | 2.65E-02 | -10.63 | 8.12  | 1.91E-01 | -9.14   | 14.46  | 5.28E-01 | -6.80  | 4.98  | 1.72E-01 | -12.65 | 11.22 | 2.60E-01 |
| cg10911054 | -16.65 | 7.50  | 2.65E-02 | -21.97 | 11.51 | 5.64E-02 | 0.90    | 22.25  | 9.68E-01 | -31.67 | 20.24 | 1.18E-01 | -9.47  | 13.18 | 4.72E-01 |
| cg13382322 | 20.23  | 9.12  | 2.65E-02 | 52.84  | 33.68 | 1.17E-01 | 23.81   | 63.15  | 7.06E-01 | 14.60  | 9.90  | 1.40E-01 | 60.32  | 37.93 | 1.12E-01 |
| cg13424673 | 18.39  | 8.29  | 2.65E-02 | 27.79  | 14.76 | 5.98E-02 | 0.89    | 22.09  | 9.68E-01 | 33.30  | 18.59 | 7.32E-02 | 8.36   | 14.11 | 5.54E-01 |
| cg17519696 | -6.50  | 2.93  | 2.65E-02 | -3.98  | 4.10  | 3.31E-01 | -10.44  | 6.00   | 8.19E-02 | -11.82 | 11.21 | 2.92E-01 | -6.40  | 6.85  | 3.50E-01 |
| cg02234281 | -9.49  | 4.28  | 2.65E-02 | -10.09 | 6.08  | 9.71E-02 | -8.68   | 10.98  | 4.29E-01 | 0.99   | 12.74 | 9.38E-01 | -13.68 | 8.72  | 1.17E-01 |
| cg19165640 | 9.28   | 4.18  | 2.65E-02 | 10.64  | 6.00  | 7.63E-02 | 9.29    | 11.31  | 4.11E-01 | 5.80   | 13.40 | 6.65E-01 | 8.12   | 7.89  | 3.04E-01 |
| cg21339084 | 18.29  | 8.24  | 2.65E-02 | 17.08  | 14.22 | 2.30E-01 | 10.11   | 15.43  | 5.12E-01 | 41.51  | 18.23 | 2.28E-02 | 6.76   | 19.77 | 7.33E-01 |
| cg11076902 | -11.86 | 5.35  | 2.65E-02 | -11.51 | 9.08  | 2.05E-01 | -25.26  | 11.50  | 2.81E-02 | -0.67  | 11.58 | 9.54E-01 | -10.13 | 11.29 | 3.70E-01 |
| cg18387659 | -9.84  | 4.43  | 2.65E-02 | -11.44 | 9.96  | 2.51E-01 | -2.63   | 13.52  | 8.46E-01 | -8.32  | 5.84  | 1.55E-01 | -21.13 | 12.90 | 1.01E-01 |
| cg23931796 | -13.05 | 5.88  | 2.65E-02 | -21.05 | 9.11  | 2.09E-02 | -12.60  | 13.09  | 3.36E-01 | -2.18  | 16.79 | 8.97E-01 | -5.69  | 11.56 | 6.23E-01 |
| cg21395723 | 15.68  | 7.07  | 2.65E-02 | 32.18  | 17.22 | 6.17E-02 | -5.24   | 38.98  | 8.93E-01 | 12.97  | 8.32  | 1.19E-01 | 13.84  | 25.41 | 5.86E-01 |
| cg21616626 | 23.31  | 10.51 | 2.65E-02 | 36.35  | 18.85 | 5.39E-02 | 2.42    | 24.79  | 9.22E-01 | 18.49  | 17.68 | 2.96E-01 | 32.26  | 26.53 | 2.24E-01 |
| cg14210811 | 24.02  | 10.83 | 2.65E-02 | 47.40  | 21.80 | 2.97E-02 | 28.03   | 27.34  | 3.05E-01 | 7.55   | 15.99 | 6.37E-01 | 32.43  | 29.16 | 2.66E-01 |
| cg17196805 | 16.65  | 7.51  | 2.65E-02 | 21.33  | 21.39 | 3.19E-01 | 29.90   | 25.52  | 2.41E-01 | 10.51  | 8.82  | 2.33E-01 | 57.75  | 29.16 | 4.77E-02 |
| cg24630825 | -7.74  | 3.49  | 2.65E-02 | -17.19 | 7.28  | 1.82E-02 | 1.88    | 9.02   | 8.35E-01 | -7.24  | 5.01  | 1.48E-01 | -4.13  | 9.50  | 6.64E-01 |
| cg03422757 | 10.32  | 4.65  | 2.65E-02 | 10.29  | 8.96  | 2.51E-01 | 1.90    | 17.49  | 9.14E-01 | 9.24   | 6.17  | 1.34E-01 | 23.83  | 15.45 | 1.23E-01 |
| cg25553665 | 24.63  | 11.10 | 2.65E-02 | 39.75  | 16.74 | 1.76E-02 | 36.62   | 40.41  | 3.65E-01 | 28.61  | 30.81 | 3.53E-01 | 1.89   | 18.63 | 9.19E-01 |
| cg24113950 | -8.76  | 3.95  | 2.65E-02 | -4.23  | 5.08  | 4.06E-01 | -7.87   | 9.03   | 3.84E-01 | -3.88  | 13.82 | 7.79E-01 | -20.53 | 7.73  | 7.90E-03 |
| cg18943599 | -29.94 | 13.50 | 2.65E-02 | -18.64 | 20.34 | 3.59E-01 | -65.66  | 36.82  | 7.45E-02 | -49.03 | 41.41 | 2.36E-01 | -24.13 | 23.90 | 3.13E-01 |
| cg22544679 | 18.44  | 8.31  | 2.65E-02 | 39.77  | 21.30 | 6.19E-02 | -1.67   | 26.83  | 9.50E-01 | 15.29  | 10.18 | 1.33E-01 | 27.68  | 28.58 | 3.33E-01 |
| cg21904251 | 19.91  | 8.98  | 2.65E-02 | 38.45  | 18.45 | 3.72E-02 | 29.77   | 19.98  | 1.36E-01 | 10.61  | 13.39 | 4.28E-01 | 0.33   | 26.80 | 9.90E-01 |
| cg12072833 | -13.65 | 6.15  | 2.65E-02 | -19.93 | 9.54  | 3.66E-02 | -9.76   | 13.27  | 4.62E-01 | -4.25  | 16.54 | 7.97E-01 | -11.57 | 12.84 | 3.67E-01 |
| cg12626076 | -9.09  | 4.10  | 2.65E-02 | -7.44  | 5.47  | 1.74E-01 | -22.07  | 10.35  | 3.29E-02 | 2.63   | 12.13 | 8.29E-01 | -10.46 | 10.01 | 2.96E-01 |
| cg00919994 | 45.15  | 20.36 | 2.66E-02 | 121.51 | 46.81 | 9.44E-03 | 21.01   | 202.29 | 9.17E-01 | 30.70  | 18.56 | 9.81E-02 | 24.98  | 52.37 | 6.33E-01 |
| cg13521002 | 12.36  | 5.57  | 2.66E-02 | 21.00  | 9.64  | 2.94E-02 | -1.60   | 10.54  | 8.79E-01 | 11.21  | 10.60 | 2.91E-01 | 23.18  | 15.87 | 1.44E-01 |
| cg01153660 | -15.19 | 6.85  | 2.66E-02 | -30.04 | 36.19 | 4.06E-01 | 39.89   | 133.04 | 7.64E-01 | -14.60 | 7.13  | 4.05E-02 | -19.26 | 34.99 | 5.82E-01 |

|            |        |       |          |        |       |          |         |        |          |        |       |          |        |       |          |
|------------|--------|-------|----------|--------|-------|----------|---------|--------|----------|--------|-------|----------|--------|-------|----------|
| cg12809489 | 20.21  | 9.11  | 2.66E-02 | 17.61  | 17.57 | 3.16E-01 | 24.49   | 16.45  | 1.37E-01 | 14.69  | 17.70 | 4.06E-01 | 25.52  | 22.84 | 2.64E-01 |
| cg23221737 | -17.72 | 7.99  | 2.66E-02 | -38.28 | 16.18 | 1.80E-02 | -8.89   | 16.46  | 5.89E-01 | 1.28   | 19.33 | 9.47E-01 | -18.60 | 13.51 | 1.68E-01 |
| cg11525409 | 6.13   | 2.76  | 2.66E-02 | 5.21   | 3.52  | 1.39E-01 | 13.62   | 7.53   | 7.07E-02 | 4.39   | 7.87  | 5.77E-01 | 4.34   | 7.78  | 5.77E-01 |
| cg00967854 | 22.84  | 10.30 | 2.66E-02 | 55.15  | 19.70 | 5.12E-03 | 13.31   | 26.59  | 6.17E-01 | 18.43  | 8.85  | 3.74E-02 | -4.46  | 28.26 | 8.75E-01 |
| cg18297538 | 18.17  | 8.19  | 2.66E-02 | 12.79  | 26.97 | 6.35E-01 | -4.95   | 87.72  | 9.55E-01 | 21.86  | 9.29  | 1.87E-02 | 0.36   | 23.49 | 9.88E-01 |
| cg19725489 | 9.89   | 4.46  | 2.66E-02 | 10.26  | 5.75  | 7.44E-02 | 20.59   | 15.70  | 1.90E-01 | 20.36  | 15.78 | 1.97E-01 | 1.81   | 9.15  | 8.43E-01 |
| cg16520357 | 5.33   | 2.41  | 2.66E-02 | 5.09   | 3.65  | 1.63E-01 | 12.03   | 5.93   | 4.23E-02 | 2.57   | 4.43  | 5.61E-01 | 3.62   | 7.39  | 6.24E-01 |
| cg13940029 | -13.73 | 6.19  | 2.66E-02 | -18.22 | 12.41 | 1.42E-01 | -7.91   | 17.89  | 6.58E-01 | -11.32 | 8.86  | 2.01E-01 | -19.01 | 16.38 | 2.46E-01 |
| cg12552033 | 30.92  | 13.94 | 2.66E-02 | 1.03   | 36.67 | 9.77E-01 | -38.80  | 177.35 | 8.27E-01 | 40.33  | 15.88 | 1.11E-02 | -1.26  | 49.98 | 9.80E-01 |
| cg14240490 | 18.80  | 8.48  | 2.66E-02 | 24.96  | 18.61 | 1.80E-01 | -13.74  | 25.02  | 5.83E-01 | 26.28  | 11.47 | 2.19E-02 | 6.38   | 23.41 | 7.85E-01 |
| cg21773162 | -12.21 | 5.51  | 2.66E-02 | -6.06  | 7.55  | 4.22E-01 | -23.91  | 14.72  | 1.04E-01 | -11.24 | 13.47 | 4.04E-01 | -23.26 | 13.68 | 8.92E-02 |
| cg12025832 | 16.69  | 7.52  | 2.66E-02 | -6.03  | 21.53 | 7.80E-01 | -3.40   | 30.86  | 9.12E-01 | 19.05  | 8.94  | 3.31E-02 | 37.53  | 22.70 | 9.82E-02 |
| cg07017901 | 29.00  | 13.08 | 2.66E-02 | 28.14  | 27.02 | 2.98E-01 | 28.08   | 46.05  | 5.42E-01 | 22.32  | 17.48 | 2.02E-01 | 60.95  | 36.90 | 9.86E-02 |
| cg23851515 | -8.80  | 3.97  | 2.66E-02 | -11.56 | 8.28  | 1.63E-01 | 10.83   | 19.48  | 5.78E-01 | -9.79  | 4.85  | 4.36E-02 | -0.76  | 16.16 | 9.63E-01 |
| cg09749844 | 7.71   | 3.48  | 2.66E-02 | 11.57  | 5.96  | 5.22E-02 | 11.66   | 7.91   | 1.40E-01 | 2.76   | 5.86  | 6.38E-01 | 4.79   | 10.29 | 6.42E-01 |
| cg10516359 | 19.01  | 8.57  | 2.66E-02 | 28.39  | 13.77 | 3.92E-02 | 17.41   | 16.88  | 3.02E-01 | 13.27  | 19.23 | 4.90E-01 | 5.61   | 21.75 | 7.97E-01 |
| cg11741753 | 23.31  | 10.51 | 2.66E-02 | 33.14  | 17.08 | 5.24E-02 | 20.84   | 21.85  | 3.40E-01 | 19.60  | 20.50 | 3.39E-01 | 6.15   | 29.52 | 8.35E-01 |
| cg08893692 | 18.27  | 8.24  | 2.66E-02 | 16.91  | 25.96 | 5.15E-01 | 103.32  | 84.27  | 2.20E-01 | 19.74  | 9.30  | 3.38E-02 | 0.82   | 25.47 | 9.74E-01 |
| cg05177729 | 18.53  | 8.36  | 2.66E-02 | 11.95  | 14.87 | 4.22E-01 | 13.45   | 16.68  | 4.20E-01 | 19.78  | 17.57 | 2.60E-01 | 33.33  | 18.35 | 6.94E-02 |
| cg08371772 | 19.34  | 8.72  | 2.66E-02 | 51.75  | 31.38 | 9.91E-02 | -36.09  | 135.64 | 7.90E-01 | 18.63  | 9.38  | 4.69E-02 | -11.67 | 37.63 | 7.56E-01 |
| cg12549211 | -17.45 | 7.87  | 2.66E-02 | -41.75 | 24.14 | 8.37E-02 | -9.27   | 36.06  | 7.97E-01 | -14.58 | 8.82  | 9.82E-02 | -19.19 | 35.23 | 5.86E-01 |
| cg21745307 | -20.77 | 9.37  | 2.66E-02 | -22.02 | 13.13 | 9.34E-02 | 6.51    | 36.23  | 8.57E-01 | -33.67 | 25.43 | 1.85E-01 | -18.80 | 17.45 | 2.81E-01 |
| cg16781907 | -15.61 | 7.04  | 2.66E-02 | -16.41 | 11.79 | 1.64E-01 | -28.05  | 15.21  | 6.53E-02 | -22.55 | 12.20 | 6.45E-02 | 7.18   | 14.79 | 6.28E-01 |
| cg04855961 | -13.10 | 5.91  | 2.66E-02 | -4.13  | 12.84 | 7.48E-01 | -17.04  | 15.97  | 2.86E-01 | -17.82 | 8.29  | 3.15E-02 | -5.84  | 15.61 | 7.09E-01 |
| cg09595050 | 6.38   | 2.88  | 2.66E-02 | 4.51   | 4.30  | 2.94E-01 | 3.51    | 4.76   | 4.62E-01 | 17.20  | 9.51  | 7.05E-02 | 15.59  | 9.26  | 9.23E-02 |
| cg08895021 | -42.95 | 19.37 | 2.66E-02 | -35.28 | 24.30 | 1.47E-01 | -109.24 | 69.18  | 1.14E-01 | 24.83  | 81.64 | 7.61E-01 | -58.16 | 40.42 | 1.50E-01 |
| cg00591949 | -12.69 | 5.72  | 2.66E-02 | -12.00 | 9.45  | 2.04E-01 | -21.85  | 12.52  | 8.08E-02 | -14.94 | 14.60 | 3.06E-01 | -5.25  | 11.01 | 6.34E-01 |
| cg26186727 | 12.98  | 5.86  | 2.66E-02 | 26.18  | 10.60 | 1.35E-02 | 4.64    | 16.84  | 7.83E-01 | 8.24   | 10.77 | 4.44E-01 | 7.15   | 11.11 | 5.20E-01 |
| cg22304262 | -10.59 | 4.78  | 2.66E-02 | -10.48 | 7.20  | 1.45E-01 | -11.33  | 9.60   | 2.38E-01 | -3.24  | 14.29 | 8.20E-01 | -14.06 | 10.71 | 1.90E-01 |
| cg19510075 | 34.61  | 15.61 | 2.66E-02 | 92.11  | 42.83 | 3.15E-02 | -21.55  | 193.02 | 9.11E-01 | 29.86  | 17.71 | 9.18E-02 | -8.17  | 53.93 | 8.80E-01 |
| cg08000413 | 17.15  | 7.73  | 2.66E-02 | 36.64  | 14.74 | 1.29E-02 | -7.50   | 22.57  | 7.40E-01 | 16.96  | 8.66  | 5.02E-02 | 1.41   | 22.04 | 9.49E-01 |
| cg07546293 | -10.76 | 4.86  | 2.66E-02 | -10.90 | 7.17  | 1.28E-01 | -0.55   | 10.55  | 9.59E-01 | -8.21  | 13.30 | 5.37E-01 | -23.19 | 10.96 | 3.43E-02 |
| cg13561792 | 17.09  | 7.71  | 2.66E-02 | -1.25  | 22.56 | 9.56E-01 | 36.86   | 20.88  | 7.75E-02 | 15.06  | 9.48  | 1.12E-01 | 26.35  | 26.45 | 3.19E-01 |
| cg20334627 | 35.07  | 15.82 | 2.66E-02 | 9.29   | 38.80 | 8.11E-01 | -10.79  | 46.20  | 8.15E-01 | 42.37  | 19.68 | 3.13E-02 | 105.66 | 59.75 | 7.70E-02 |
| cg18993778 | 8.18   | 3.69  | 2.67E-02 | 15.90  | 4.77  | 8.46E-04 | 7.86    | 6.00   | 1.90E-01 | 1.28   | 4.69  | 7.85E-01 | 6.95   | 9.74  | 4.75E-01 |

|            |        |       |          |        |       |          |        |        |          |        |        |          |        |       |          |
|------------|--------|-------|----------|--------|-------|----------|--------|--------|----------|--------|--------|----------|--------|-------|----------|
| cg05693204 | -10.74 | 4.85  | 2.67E-02 | -12.52 | 6.79  | 6.54E-02 | -9.21  | 11.65  | 4.29E-01 | -19.12 | 14.71  | 1.94E-01 | -3.35  | 10.59 | 7.51E-01 |
| cg21899992 | 17.04  | 7.69  | 2.67E-02 | 10.66  | 18.06 | 5.55E-01 | 17.31  | 17.56  | 3.24E-01 | 5.44   | 17.96  | 7.62E-01 | 24.32  | 11.54 | 3.51E-02 |
| cg23267759 | 10.67  | 4.81  | 2.67E-02 | 29.11  | 12.85 | 2.35E-02 | 6.05   | 14.46  | 6.76E-01 | 7.58   | 7.89   | 3.37E-01 | 8.22   | 7.85  | 2.95E-01 |
| cg01997606 | -6.54  | 2.95  | 2.67E-02 | -5.85  | 5.76  | 3.09E-01 | -1.84  | 9.09   | 8.39E-01 | -5.52  | 4.41   | 2.11E-01 | -12.76 | 6.90  | 6.45E-02 |
| cg22177356 | -38.90 | 17.55 | 2.67E-02 | -97.25 | 40.01 | 1.51E-02 | -58.67 | 162.41 | 7.18E-01 | -28.65 | 21.30  | 1.79E-01 | -0.53  | 51.24 | 9.92E-01 |
| cg11838876 | -12.54 | 5.66  | 2.67E-02 | -2.50  | 9.66  | 7.96E-01 | -20.03 | 14.30  | 1.61E-01 | -25.68 | 9.94   | 9.77E-03 | -6.56  | 9.42  | 4.86E-01 |
| cg17983064 | 9.16   | 4.13  | 2.67E-02 | 11.19  | 5.68  | 4.89E-02 | -0.04  | 10.03  | 9.97E-01 | 16.30  | 10.65  | 1.26E-01 | 5.24   | 10.63 | 6.22E-01 |
| cg08822023 | -19.50 | 8.80  | 2.67E-02 | -34.70 | 15.55 | 2.57E-02 | -11.97 | 15.94  | 4.53E-01 | -19.19 | 19.81  | 3.33E-01 | -5.39  | 20.87 | 7.96E-01 |
| cg06588802 | -7.78  | 3.51  | 2.67E-02 | -6.54  | 4.51  | 1.46E-01 | -16.30 | 9.43   | 8.37E-02 | 1.12   | 12.10  | 9.26E-01 | -9.65  | 8.52  | 2.57E-01 |
| cg25711246 | -10.03 | 4.53  | 2.67E-02 | -9.54  | 6.68  | 1.53E-01 | -16.37 | 10.20  | 1.09E-01 | -1.87  | 11.56  | 8.71E-01 | -11.21 | 10.36 | 2.79E-01 |
| cg18668679 | 16.04  | 7.24  | 2.67E-02 | 3.71   | 19.55 | 8.49E-01 | 13.43  | 17.51  | 4.43E-01 | 16.50  | 9.33   | 7.72E-02 | 36.68  | 24.09 | 1.28E-01 |
| cg12649238 | 5.16   | 2.33  | 2.67E-02 | 4.54   | 2.99  | 1.29E-01 | 9.65   | 5.90   | 1.02E-01 | 5.95   | 6.01   | 3.23E-01 | 0.10   | 7.86  | 9.90E-01 |
| cg02066331 | 7.87   | 3.55  | 2.67E-02 | 4.38   | 5.51  | 4.27E-01 | 9.51   | 7.51   | 2.05E-01 | 18.01  | 8.32   | 3.04E-02 | 3.58   | 8.42  | 6.71E-01 |
| cg22637538 | 15.71  | 7.09  | 2.67E-02 | 24.48  | 15.19 | 1.07E-01 | 4.27   | 31.02  | 8.90E-01 | 14.75  | 10.13  | 1.45E-01 | 12.21  | 14.48 | 3.99E-01 |
| cg06385202 | -8.98  | 4.05  | 2.67E-02 | -13.81 | 6.11  | 2.39E-02 | 2.04   | 8.46   | 8.09E-01 | -11.28 | 11.57  | 3.29E-01 | -9.59  | 8.89  | 2.81E-01 |
| cg02763617 | -17.16 | 7.75  | 2.67E-02 | -20.60 | 11.44 | 7.16E-02 | -18.11 | 15.89  | 2.54E-01 | 9.50   | 21.92  | 6.65E-01 | -25.69 | 18.31 | 1.61E-01 |
| cg13866093 | 8.70   | 3.93  | 2.67E-02 | 6.06   | 6.05  | 3.16E-01 | 15.14  | 8.45   | 7.31E-02 | 8.60   | 11.10  | 4.38E-01 | 7.57   | 8.05  | 3.47E-01 |
| cg18108008 | 23.08  | 10.42 | 2.67E-02 | -1.29  | 19.61 | 9.47E-01 | 50.42  | 43.09  | 2.42E-01 | 35.78  | 14.91  | 1.64E-02 | 17.69  | 25.20 | 4.83E-01 |
| cg05412028 | 10.34  | 4.66  | 2.67E-02 | 12.52  | 10.98 | 2.54E-01 | 35.18  | 23.77  | 1.39E-01 | 10.47  | 5.64   | 6.33E-02 | -4.50  | 14.94 | 7.63E-01 |
| cg07099073 | -10.57 | 4.77  | 2.67E-02 | -12.62 | 11.34 | 2.66E-01 | 5.07   | 24.37  | 8.35E-01 | -11.23 | 5.96   | 5.93E-02 | -9.24  | 12.60 | 4.63E-01 |
| cg08086720 | 15.42  | 6.96  | 2.67E-02 | 32.68  | 17.18 | 5.71E-02 | 14.96  | 23.38  | 5.22E-01 | 13.22  | 9.04   | 1.43E-01 | 5.78   | 17.70 | 7.44E-01 |
| cg08615694 | 16.44  | 7.42  | 2.67E-02 | 13.45  | 10.49 | 2.00E-01 | 28.03  | 17.82  | 1.16E-01 | 0.39   | 28.13  | 9.89E-01 | 18.78  | 14.64 | 1.99E-01 |
| cg23109041 | 16.24  | 7.33  | 2.67E-02 | 33.87  | 20.02 | 9.07E-02 | 31.15  | 29.79  | 2.96E-01 | 10.14  | 8.48   | 2.32E-01 | 37.84  | 30.04 | 2.08E-01 |
| cg23852348 | -8.60  | 3.88  | 2.67E-02 | -7.07  | 7.00  | 3.12E-01 | -9.77  | 12.82  | 4.46E-01 | -7.13  | 5.61   | 2.04E-01 | -17.27 | 11.08 | 1.19E-01 |
| cg00487142 | 5.14   | 2.32  | 2.67E-02 | 5.71   | 3.80  | 1.33E-01 | 2.53   | 4.68   | 5.88E-01 | 2.99   | 4.46   | 5.03E-01 | 14.10  | 6.92  | 4.15E-02 |
| cg20425130 | 27.76  | 12.53 | 2.67E-02 | 29.62  | 14.10 | 3.57E-02 | -20.17 | 70.67  | 7.75E-01 | 76.79  | 43.48  | 7.74E-02 | -14.36 | 40.53 | 7.23E-01 |
| cg23474890 | -6.08  | 2.75  | 2.67E-02 | -3.80  | 4.03  | 3.46E-01 | -9.16  | 7.77   | 2.38E-01 | -6.99  | 5.58   | 2.10E-01 | -8.81  | 6.69  | 1.88E-01 |
| cg13461622 | -7.54  | 3.40  | 2.67E-02 | -7.20  | 4.08  | 7.72E-02 | -18.90 | 8.00   | 1.82E-02 | 3.10   | 9.06   | 7.32E-01 | -6.06  | 7.02  | 3.88E-01 |
| cg02625925 | 17.50  | 7.90  | 2.67E-02 | 22.02  | 12.42 | 7.62E-02 | 18.25  | 13.69  | 1.83E-01 | 10.50  | 22.27  | 6.37E-01 | 8.74   | 21.30 | 6.81E-01 |
| cg14991487 | 19.68  | 8.88  | 2.67E-02 | 21.64  | 14.17 | 1.27E-01 | 12.94  | 25.41  | 6.11E-01 | 36.99  | 23.09  | 1.09E-01 | 12.23  | 15.31 | 4.24E-01 |
| cg05567646 | -8.05  | 3.63  | 2.67E-02 | -10.23 | 5.52  | 6.40E-02 | -14.56 | 7.33   | 4.71E-02 | 5.66   | 9.34   | 5.45E-01 | -6.31  | 7.57  | 4.05E-01 |
| cg25677288 | 12.30  | 5.55  | 2.67E-02 | 13.78  | 12.59 | 2.74E-01 | 21.16  | 30.70  | 4.91E-01 | 7.93   | 6.95   | 2.54E-01 | 28.94  | 15.20 | 5.70E-02 |
| cg06621060 | -55.65 | 25.12 | 2.67E-02 | -25.22 | 35.04 | 4.72E-01 | -80.10 | 128.82 | 5.34E-01 | -42.20 | 100.39 | 6.74E-01 | -95.99 | 40.46 | 1.77E-02 |
| cg01505109 | 17.95  | 8.10  | 2.67E-02 | 1.55   | 16.49 | 9.25E-01 | 25.46  | 14.55  | 8.01E-02 | 18.10  | 14.39  | 2.09E-01 | 29.92  | 22.31 | 1.80E-01 |
| cg23352424 | -14.49 | 6.54  | 2.67E-02 | -25.47 | 11.34 | 2.47E-02 | -3.86  | 14.47  | 7.89E-01 | -3.65  | 12.71  | 7.74E-01 | -21.50 | 14.69 | 1.43E-01 |

|            |        |       |          |        |       |          |        |        |          |        |       |          |        |       |          |
|------------|--------|-------|----------|--------|-------|----------|--------|--------|----------|--------|-------|----------|--------|-------|----------|
| cg15387785 | 29.70  | 13.41 | 2.67E-02 | 28.11  | 17.00 | 9.83E-02 | -6.09  | 50.81  | 9.05E-01 | 21.92  | 35.92 | 5.42E-01 | 56.68  | 32.59 | 8.20E-02 |
| cg03539765 | 6.06   | 2.73  | 2.67E-02 | 7.34   | 4.57  | 1.08E-01 | 6.77   | 5.77   | 2.40E-01 | 8.33   | 6.11  | 1.73E-01 | 1.12   | 5.86  | 8.49E-01 |
| cg23367076 | 15.61  | 7.04  | 2.67E-02 | 36.88  | 14.54 | 1.12E-02 | -0.75  | 15.04  | 9.60E-01 | 14.47  | 9.79  | 1.40E-01 | 11.36  | 15.82 | 4.73E-01 |
| cg13148650 | -10.28 | 4.64  | 2.67E-02 | -14.91 | 10.00 | 1.36E-01 | -25.40 | 15.08  | 9.22E-02 | -7.03  | 6.10  | 2.49E-01 | -5.38  | 13.86 | 6.98E-01 |
| cg10827479 | -7.68  | 3.47  | 2.67E-02 | -15.26 | 6.65  | 2.17E-02 | -6.88  | 6.53   | 2.92E-01 | -3.40  | 5.96  | 5.68E-01 | -4.07  | 10.55 | 7.00E-01 |
| cg01703329 | 10.91  | 4.92  | 2.67E-02 | 10.61  | 6.70  | 1.13E-01 | 25.29  | 12.36  | 4.08E-02 | 7.31   | 12.13 | 5.47E-01 | -0.33  | 13.35 | 9.80E-01 |
| cg02712165 | 13.93  | 6.29  | 2.67E-02 | 6.98   | 10.85 | 5.20E-01 | 14.16  | 11.36  | 2.13E-01 | 16.11  | 15.46 | 2.97E-01 | 23.81  | 14.33 | 9.66E-02 |
| cg17187521 | 8.26   | 3.73  | 2.68E-02 | 9.45   | 4.93  | 5.52E-02 | 17.25  | 9.30   | 6.37E-02 | 3.11   | 12.15 | 7.98E-01 | -1.21  | 8.96  | 8.93E-01 |
| cg02659854 | 8.24   | 3.72  | 2.68E-02 | 7.75   | 4.81  | 1.07E-01 | 16.37  | 10.56  | 1.21E-01 | 5.93   | 10.44 | 5.70E-01 | 5.44   | 9.56  | 5.69E-01 |
| cg05051734 | -21.60 | 9.75  | 2.68E-02 | -15.49 | 18.72 | 4.08E-01 | -47.36 | 32.97  | 1.51E-01 | -21.31 | 13.50 | 1.14E-01 | -17.90 | 28.24 | 5.26E-01 |
| cg01576260 | -12.46 | 5.63  | 2.68E-02 | -13.72 | 9.89  | 1.65E-01 | -13.96 | 11.62  | 2.30E-01 | -8.99  | 10.60 | 3.96E-01 | -13.84 | 14.07 | 3.25E-01 |
| cg25646029 | 13.92  | 6.28  | 2.68E-02 | 19.16  | 9.16  | 3.64E-02 | 16.65  | 14.22  | 2.42E-01 | -8.12  | 19.16 | 6.72E-01 | 11.12  | 13.20 | 3.99E-01 |
| cg00116092 | 17.26  | 7.79  | 2.68E-02 | 28.21  | 12.18 | 2.05E-02 | 13.01  | 18.99  | 4.93E-01 | 11.28  | 26.18 | 6.66E-01 | 7.55   | 13.49 | 5.76E-01 |
| cg10643578 | 36.37  | 16.42 | 2.68E-02 | 81.44  | 52.40 | 1.20E-01 | 95.13  | 230.80 | 6.80E-01 | 30.62  | 18.67 | 1.01E-01 | 34.10  | 46.65 | 4.65E-01 |
| cg20794855 | 6.60   | 2.98  | 2.68E-02 | 7.93   | 3.83  | 3.83E-02 | 11.48  | 8.26   | 1.65E-01 | 5.35   | 8.80  | 5.43E-01 | -2.05  | 7.68  | 7.90E-01 |
| cg20319698 | 9.61   | 4.34  | 2.68E-02 | 15.36  | 6.40  | 1.64E-02 | -1.32  | 10.24  | 8.97E-01 | 7.29   | 8.52  | 3.92E-01 | 8.82   | 13.55 | 5.15E-01 |
| cg01896807 | -8.98  | 4.05  | 2.68E-02 | -11.94 | 5.62  | 3.35E-02 | 5.22   | 9.56   | 5.85E-01 | -18.56 | 13.13 | 1.58E-01 | -9.50  | 8.75  | 2.77E-01 |
| cg00342313 | -18.41 | 8.31  | 2.68E-02 | -7.10  | 17.46 | 6.84E-01 | -21.29 | 25.79  | 4.09E-01 | -15.01 | 11.23 | 1.81E-01 | -52.39 | 23.85 | 2.80E-02 |
| cg16026088 | 20.55  | 9.28  | 2.68E-02 | 26.20  | 11.53 | 2.30E-02 | -8.13  | 30.22  | 7.88E-01 | -63.19 | 64.38 | 3.26E-01 | 23.85  | 19.06 | 2.11E-01 |
| cg24202817 | 16.96  | 7.66  | 2.68E-02 | 18.64  | 10.54 | 7.70E-02 | 15.37  | 19.17  | 4.23E-01 | 16.40  | 23.73 | 4.90E-01 | 14.22  | 16.78 | 3.97E-01 |
| cg15984516 | 17.91  | 8.09  | 2.68E-02 | 19.66  | 11.32 | 8.25E-02 | 5.43   | 17.47  | 7.56E-01 | 46.19  | 30.67 | 1.32E-01 | 17.01  | 17.81 | 3.39E-01 |
| cg10284006 | -12.18 | 5.50  | 2.68E-02 | -10.08 | 9.44  | 2.86E-01 | -8.46  | 12.29  | 4.91E-01 | -17.93 | 12.77 | 1.60E-01 | -13.59 | 10.48 | 1.95E-01 |
| cg26950624 | 25.51  | 11.52 | 2.68E-02 | 59.33  | 17.62 | 7.59E-04 | 13.04  | 22.37  | 5.60E-01 | 15.30  | 7.91  | 5.32E-02 | 14.48  | 28.21 | 6.08E-01 |
| cg24263283 | -11.33 | 5.12  | 2.68E-02 | -18.25 | 10.89 | 9.38E-02 | -9.74  | 14.56  | 5.03E-01 | -9.06  | 7.45  | 2.24E-01 | -9.93  | 11.94 | 4.06E-01 |
| cg15644413 | 7.05   | 3.18  | 2.68E-02 | 6.67   | 4.38  | 1.28E-01 | 15.80  | 8.49   | 6.27E-02 | 9.64   | 7.20  | 1.81E-01 | -4.33  | 8.67  | 6.17E-01 |
| cg03352975 | -25.10 | 11.33 | 2.68E-02 | -27.31 | 17.78 | 1.25E-01 | -25.81 | 56.86  | 6.50E-01 | -46.61 | 53.70 | 3.85E-01 | -21.41 | 15.88 | 1.78E-01 |
| cg22081879 | -7.64  | 3.45  | 2.68E-02 | -3.32  | 6.06  | 5.83E-01 | -2.54  | 8.00   | 7.51E-01 | -11.73 | 5.99  | 5.01E-02 | -13.99 | 8.72  | 1.09E-01 |
| cg10503473 | -48.89 | 22.08 | 2.68E-02 | -63.12 | 34.64 | 6.85E-02 | 96.40  | 98.29  | 3.27E-01 | -36.78 | 40.92 | 3.69E-01 | -68.99 | 43.94 | 1.16E-01 |
| cg00704780 | 9.63   | 4.35  | 2.68E-02 | 10.04  | 6.72  | 1.35E-01 | 16.44  | 11.05  | 1.37E-01 | 13.53  | 7.63  | 7.61E-02 | -8.97  | 11.94 | 4.52E-01 |
| cg02258112 | 19.00  | 8.58  | 2.68E-02 | 1.23   | 18.87 | 9.48E-01 | 36.60  | 48.91  | 4.54E-01 | 22.63  | 10.43 | 3.00E-02 | 26.91  | 29.38 | 3.60E-01 |
| cg12209042 | 37.42  | 16.90 | 2.68E-02 | 35.25  | 24.32 | 1.47E-01 | 39.09  | 67.35  | 5.62E-01 | 15.79  | 39.60 | 6.90E-01 | 55.34  | 32.39 | 8.75E-02 |
| cg02574484 | 16.91  | 7.64  | 2.68E-02 | -0.39  | 16.27 | 9.81E-01 | 19.60  | 17.42  | 2.61E-01 | 20.63  | 11.50 | 7.28E-02 | 28.28  | 19.99 | 1.57E-01 |
| cg02358477 | -29.90 | 13.50 | 2.68E-02 | -40.58 | 15.40 | 8.43E-03 | -9.26  | 66.24  | 8.89E-01 | 28.96  | 59.79 | 6.28E-01 | 1.38   | 36.22 | 9.70E-01 |
| cg10416668 | -13.45 | 6.08  | 2.68E-02 | -14.41 | 10.72 | 1.79E-01 | -8.33  | 14.53  | 5.67E-01 | -13.47 | 12.29 | 2.73E-01 | -15.71 | 11.94 | 1.88E-01 |
| cg17106073 | 8.90   | 4.02  | 2.68E-02 | 13.83  | 8.84  | 1.18E-01 | -3.02  | 18.46  | 8.70E-01 | 8.56   | 4.87  | 7.85E-02 | 5.36   | 15.94 | 7.37E-01 |



|            |        |       |          |        |       |          |        |        |          |        |       |          |        |       |          |
|------------|--------|-------|----------|--------|-------|----------|--------|--------|----------|--------|-------|----------|--------|-------|----------|
| cg27450668 | -18.37 | 8.30  | 2.68E-02 | -31.75 | 15.31 | 3.82E-02 | 0.54   | 33.49  | 9.87E-01 | -20.17 | 15.61 | 1.96E-01 | -9.33  | 13.78 | 4.98E-01 |
| cg23222057 | -14.74 | 6.66  | 2.68E-02 | -21.83 | 10.63 | 4.01E-02 | -13.84 | 18.38  | 4.51E-01 | -17.83 | 15.99 | 2.65E-01 | -4.20  | 12.09 | 7.28E-01 |
| cg18118033 | 42.26  | 19.09 | 2.68E-02 | 58.59  | 23.82 | 1.39E-02 | 38.29  | 65.17  | 5.57E-01 | 31.99  | 59.70 | 5.92E-01 | -11.36 | 46.32 | 8.06E-01 |
| cg08464402 | -13.46 | 6.08  | 2.68E-02 | -19.67 | 11.33 | 8.25E-02 | -5.68  | 14.59  | 6.97E-01 | -6.31  | 5.36  | 2.40E-01 | -33.60 | 13.43 | 1.23E-02 |
| cg23133255 | -10.66 | 4.82  | 2.68E-02 | -8.99  | 7.23  | 2.14E-01 | -17.90 | 14.49  | 2.17E-01 | -6.03  | 10.20 | 5.54E-01 | -15.07 | 10.22 | 1.40E-01 |
| cg21536585 | 37.19  | 16.80 | 2.68E-02 | 31.39  | 21.29 | 1.40E-01 | 3.46   | 57.39  | 9.52E-01 | -11.81 | 58.80 | 8.41E-01 | 87.10  | 36.63 | 1.74E-02 |
| cg00249032 | 17.02  | 7.69  | 2.68E-02 | 29.73  | 18.21 | 1.03E-01 | 55.19  | 38.28  | 1.49E-01 | 9.80   | 9.21  | 2.87E-01 | 31.56  | 26.47 | 2.33E-01 |
| cg07283795 | -10.65 | 4.81  | 2.68E-02 | -17.50 | 10.19 | 8.59E-02 | -2.55  | 14.18  | 8.57E-01 | -8.62  | 7.10  | 2.25E-01 | -12.36 | 10.71 | 2.49E-01 |
| cg19371339 | -6.95  | 3.14  | 2.68E-02 | -9.02  | 6.49  | 1.65E-01 | -17.97 | 9.20   | 5.08E-02 | -2.96  | 4.49  | 5.10E-01 | -8.10  | 7.83  | 3.01E-01 |
| cg07169834 | 21.44  | 9.69  | 2.69E-02 | 24.18  | 10.94 | 2.71E-02 | 19.73  | 39.04  | 6.13E-01 | -36.99 | 59.43 | 5.34E-01 | 17.60  | 27.11 | 5.16E-01 |
| cg02674384 | 11.15  | 5.04  | 2.69E-02 | 7.34   | 9.35  | 4.32E-01 | 29.03  | 20.96  | 1.66E-01 | 11.34  | 8.58  | 1.86E-01 | 11.19  | 9.09  | 2.18E-01 |
| cg24051487 | -25.42 | 11.49 | 2.69E-02 | -42.97 | 14.13 | 2.36E-03 | -40.31 | 27.54  | 1.43E-01 | -6.68  | 5.94  | 2.61E-01 | -30.39 | 19.15 | 1.13E-01 |
| cg02053477 | -10.14 | 4.58  | 2.69E-02 | -12.18 | 7.86  | 1.21E-01 | 1.27   | 10.35  | 9.03E-01 | -18.18 | 9.02  | 4.38E-02 | -7.56  | 10.08 | 4.53E-01 |
| cg06131338 | 26.18  | 11.83 | 2.69E-02 | 11.73  | 22.25 | 5.98E-01 | 68.88  | 52.08  | 1.86E-01 | 28.63  | 15.75 | 6.91E-02 | 31.02  | 36.96 | 4.01E-01 |
| cg12476455 | -8.10  | 3.66  | 2.69E-02 | -6.52  | 6.18  | 2.92E-01 | -9.43  | 9.91   | 3.42E-01 | -4.67  | 6.26  | 4.55E-01 | -17.14 | 8.85  | 5.27E-02 |
| cg21975834 | 6.90   | 3.12  | 2.69E-02 | 9.28   | 4.24  | 2.85E-02 | 5.01   | 7.07   | 4.79E-01 | 7.38   | 8.95  | 4.10E-01 | 0.02   | 8.28  | 9.98E-01 |
| cg20522483 | 16.88  | 7.63  | 2.69E-02 | 22.96  | 14.96 | 1.25E-01 | -0.81  | 27.55  | 9.77E-01 | 12.20  | 10.23 | 2.33E-01 | 39.10  | 23.28 | 9.31E-02 |
| cg14797990 | -9.53  | 4.30  | 2.69E-02 | -8.29  | 8.02  | 3.01E-01 | -10.28 | 8.81   | 2.43E-01 | -5.32  | 7.69  | 4.89E-01 | -18.86 | 10.76 | 7.97E-02 |
| cg05475667 | 22.41  | 10.12 | 2.69E-02 | 37.93  | 16.57 | 2.20E-02 | 23.96  | 28.00  | 3.92E-01 | 16.42  | 31.66 | 6.04E-01 | 8.72   | 16.13 | 5.89E-01 |
| cg03376481 | -18.38 | 8.30  | 2.69E-02 | -41.06 | 13.08 | 1.70E-03 | 2.38   | 23.66  | 9.20E-01 | -12.36 | 6.73  | 6.62E-02 | -13.52 | 18.85 | 4.73E-01 |
| cg02628801 | -34.28 | 15.49 | 2.69E-02 | -19.22 | 24.16 | 4.26E-01 | -93.15 | 218.12 | 6.69E-01 | -54.56 | 22.29 | 1.44E-02 | 4.21   | 48.68 | 9.31E-01 |
| cg13003513 | 15.80  | 7.14  | 2.69E-02 | 8.63   | 13.76 | 5.30E-01 | 17.75  | 17.20  | 3.02E-01 | 17.63  | 10.52 | 9.39E-02 | 23.52  | 22.82 | 3.03E-01 |
| cg11789534 | 6.44   | 2.91  | 2.69E-02 | 4.63   | 3.79  | 2.22E-01 | 11.61  | 6.60   | 7.83E-02 | 13.07  | 9.61  | 1.74E-01 | 2.05   | 8.26  | 8.04E-01 |
| cg16548254 | 18.49  | 8.35  | 2.69E-02 | 13.52  | 12.66 | 2.86E-01 | 21.77  | 16.01  | 1.74E-01 | 1.40   | 21.46 | 9.48E-01 | 45.91  | 22.26 | 3.92E-02 |
| cg15270790 | -12.77 | 5.77  | 2.69E-02 | -24.18 | 10.61 | 2.27E-02 | -7.52  | 13.29  | 5.71E-01 | -7.50  | 8.99  | 4.04E-01 | -10.75 | 18.00 | 5.50E-01 |
| cg26864036 | -19.75 | 8.92  | 2.69E-02 | -25.67 | 12.76 | 4.42E-02 | -24.13 | 26.32  | 3.59E-01 | -15.92 | 18.80 | 3.97E-01 | -4.85  | 21.62 | 8.22E-01 |
| cg03253303 | -9.67  | 4.37  | 2.69E-02 | -12.10 | 6.78  | 7.44E-02 | -9.53  | 10.94  | 3.84E-01 | -9.56  | 9.97  | 3.37E-01 | -5.53  | 9.04  | 5.40E-01 |
| cg13718827 | 11.11  | 5.02  | 2.69E-02 | 7.72   | 5.14  | 1.33E-01 | 22.64  | 9.65   | 1.90E-02 | 21.57  | 12.45 | 8.31E-02 | -2.11  | 11.00 | 8.48E-01 |
| cg04565473 | 8.05   | 3.64  | 2.69E-02 | 9.50   | 5.27  | 7.18E-02 | 8.98   | 9.18   | 3.28E-01 | 5.46   | 8.91  | 5.40E-01 | 6.04   | 8.11  | 4.57E-01 |
| cg23666831 | -11.00 | 4.97  | 2.69E-02 | -12.97 | 7.63  | 8.94E-02 | -0.46  | 11.65  | 9.69E-01 | -10.04 | 14.80 | 4.98E-01 | -15.25 | 9.38  | 1.04E-01 |
| cg24997231 | 5.72   | 2.59  | 2.69E-02 | 6.12   | 5.05  | 2.26E-01 | 8.81   | 6.92   | 2.03E-01 | 5.08   | 3.66  | 1.66E-01 | 3.56   | 8.17  | 6.63E-01 |
| cg23614125 | 5.80   | 2.62  | 2.69E-02 | 2.34   | 4.86  | 6.30E-01 | 5.87   | 5.35   | 2.72E-01 | 9.20   | 4.51  | 4.15E-02 | 4.59   | 7.20  | 5.24E-01 |
| cg15713391 | 14.39  | 6.50  | 2.69E-02 | 38.92  | 19.29 | 4.36E-02 | 0.46   | 24.92  | 9.85E-01 | 10.50  | 7.37  | 1.54E-01 | 42.77  | 31.88 | 1.80E-01 |
| cg15986555 | -7.74  | 3.50  | 2.69E-02 | -7.75  | 6.73  | 2.49E-01 | -0.56  | 9.20   | 9.52E-01 | -12.49 | 5.31  | 1.86E-02 | -0.91  | 9.03  | 9.19E-01 |
| cg21792737 | -8.05  | 3.64  | 2.69E-02 | -7.88  | 5.19  | 1.29E-01 | -13.96 | 8.32   | 9.31E-02 | -3.11  | 8.79  | 7.23E-01 | -6.65  | 9.47  | 4.82E-01 |

|            |        |       |          |        |       |          |         |        |          |        |       |          |        |       |          |
|------------|--------|-------|----------|--------|-------|----------|---------|--------|----------|--------|-------|----------|--------|-------|----------|
| cg21152690 | 11.10  | 5.02  | 2.69E-02 | 15.77  | 13.09 | 2.28E-01 | 52.97   | 43.25  | 2.21E-01 | 11.32  | 5.80  | 5.09E-02 | -4.46  | 16.65 | 7.89E-01 |
| cg14508508 | 13.31  | 6.02  | 2.69E-02 | 10.66  | 12.27 | 3.85E-01 | 16.17   | 13.98  | 2.47E-01 | 16.15  | 10.57 | 1.27E-01 | 10.07  | 12.01 | 4.02E-01 |
| cg14398946 | 31.08  | 14.05 | 2.69E-02 | 28.42  | 30.83 | 3.57E-01 | 82.24   | 86.09  | 3.39E-01 | 38.22  | 17.84 | 3.22E-02 | -4.78  | 36.77 | 8.97E-01 |
| cg13357714 | -10.03 | 4.53  | 2.69E-02 | -12.20 | 6.75  | 7.06E-02 | 6.29    | 12.45  | 6.14E-01 | -5.81  | 10.36 | 5.75E-01 | -18.94 | 9.58  | 4.80E-02 |
| cg23224666 | -9.26  | 4.19  | 2.69E-02 | -5.87  | 9.19  | 5.23E-01 | -26.04  | 18.06  | 1.49E-01 | -7.67  | 5.21  | 1.41E-01 | -18.22 | 13.70 | 1.84E-01 |
| cg15629134 | 22.82  | 10.31 | 2.69E-02 | 8.31   | 31.98 | 7.95E-01 | 19.82   | 99.15  | 8.42E-01 | 23.51  | 11.35 | 3.82E-02 | 39.14  | 42.38 | 3.56E-01 |
| cg26020069 | -10.79 | 4.88  | 2.69E-02 | -13.94 | 9.10  | 1.25E-01 | -1.25   | 13.15  | 9.24E-01 | -8.13  | 7.85  | 3.00E-01 | -18.42 | 11.23 | 1.01E-01 |
| cg04957757 | 14.45  | 6.53  | 2.69E-02 | 21.69  | 9.90  | 2.84E-02 | 19.66   | 12.70  | 1.22E-01 | -8.60  | 16.15 | 5.94E-01 | 8.91   | 17.67 | 6.14E-01 |
| cg02832322 | 42.86  | 19.37 | 2.69E-02 | 45.07  | 26.49 | 8.89E-02 | -4.91   | 61.07  | 9.36E-01 | 57.78  | 45.15 | 2.01E-01 | 47.74  | 45.61 | 2.95E-01 |
| cg26097364 | 22.33  | 10.09 | 2.69E-02 | 20.34  | 20.27 | 3.16E-01 | -19.27  | 43.39  | 6.57E-01 | 22.20  | 13.43 | 9.83E-02 | 43.62  | 27.71 | 1.16E-01 |
| cg19717640 | -6.62  | 2.99  | 2.69E-02 | -12.21 | 6.03  | 4.30E-02 | -8.39   | 9.76   | 3.90E-01 | -2.32  | 4.16  | 5.78E-01 | -11.49 | 7.95  | 1.49E-01 |
| cg01080357 | 22.34  | 10.10 | 2.69E-02 | 38.76  | 19.96 | 5.22E-02 | 12.22   | 19.81  | 5.37E-01 | 5.90   | 17.72 | 7.39E-01 | 45.85  | 25.24 | 6.93E-02 |
| cg10373733 | 25.66  | 11.60 | 2.70E-02 | 10.69  | 15.56 | 4.92E-01 | 61.55   | 54.01  | 2.54E-01 | 55.25  | 53.47 | 3.01E-01 | 40.68  | 19.57 | 3.77E-02 |
| cg15799791 | -37.38 | 16.90 | 2.70E-02 | -20.18 | 23.86 | 3.98E-01 | 29.31   | 59.64  | 6.23E-01 | -64.07 | 40.59 | 1.14E-01 | -66.51 | 30.09 | 2.71E-02 |
| cg03103770 | 20.68  | 9.35  | 2.70E-02 | 27.40  | 32.12 | 3.94E-01 | 72.36   | 109.95 | 5.10E-01 | 17.94  | 10.11 | 7.59E-02 | 47.22  | 40.68 | 2.46E-01 |
| cg24728435 | -40.14 | 18.14 | 2.70E-02 | -64.72 | 54.21 | 2.32E-01 | -201.03 | 190.61 | 2.92E-01 | -37.89 | 20.34 | 6.24E-02 | -10.87 | 63.06 | 8.63E-01 |
| cg27262702 | 11.31  | 5.11  | 2.70E-02 | 9.83   | 8.78  | 2.63E-01 | -23.23  | 29.83  | 4.36E-01 | 11.09  | 7.02  | 1.14E-01 | 27.72  | 16.19 | 8.68E-02 |
| cg21031917 | -10.70 | 4.83  | 2.70E-02 | -22.32 | 6.80  | 1.04E-03 | -2.30   | 9.58   | 8.10E-01 | -4.96  | 5.08  | 3.29E-01 | -13.09 | 10.18 | 1.98E-01 |
| cg03947979 | 16.49  | 7.45  | 2.70E-02 | 20.94  | 10.25 | 4.11E-02 | 15.30   | 26.48  | 5.63E-01 | 23.06  | 30.51 | 4.50E-01 | 8.52   | 12.92 | 5.10E-01 |
| cg25287482 | -11.65 | 5.27  | 2.70E-02 | -9.35  | 7.42  | 2.08E-01 | -22.38  | 11.95  | 6.10E-02 | -3.84  | 18.26 | 8.34E-01 | -10.39 | 11.26 | 3.56E-01 |
| cg25673241 | -11.27 | 5.09  | 2.70E-02 | -12.88 | 7.76  | 9.71E-02 | -11.69  | 11.37  | 3.04E-01 | -5.62  | 12.53 | 6.54E-01 | -12.05 | 11.30 | 2.86E-01 |
| cg09547427 | 22.41  | 10.13 | 2.70E-02 | -2.97  | 16.52 | 8.58E-01 | 29.97   | 15.70  | 5.62E-02 | 42.81  | 17.30 | 1.33E-02 | 19.61  | 21.80 | 3.68E-01 |
| cg20880234 | -58.12 | 26.28 | 2.70E-02 | -51.67 | 27.18 | 5.73E-02 | -200.74 | 79.37  | 1.14E-02 | -10.01 | 75.70 | 8.95E-01 | -39.15 | 39.89 | 3.26E-01 |
| cg03806261 | -13.31 | 6.02  | 2.70E-02 | -14.06 | 8.94  | 1.16E-01 | -11.76  | 17.22  | 4.95E-01 | -13.12 | 13.87 | 3.44E-01 | -12.81 | 12.35 | 3.00E-01 |
| cg13934560 | 10.69  | 4.83  | 2.70E-02 | 17.05  | 9.64  | 7.71E-02 | -0.88   | 9.93   | 9.29E-01 | 12.40  | 7.57  | 1.01E-01 | 14.88  | 14.90 | 3.18E-01 |
| cg05844789 | -7.92  | 3.58  | 2.70E-02 | -8.54  | 4.84  | 7.77E-02 | -7.08   | 8.80   | 4.21E-01 | -14.34 | 13.05 | 2.72E-01 | -4.70  | 7.79  | 5.47E-01 |
| cg02724647 | -15.25 | 6.90  | 2.70E-02 | -17.51 | 12.47 | 1.60E-01 | -19.97  | 14.45  | 1.67E-01 | -10.06 | 13.56 | 4.58E-01 | -13.22 | 15.13 | 3.82E-01 |
| cg20379725 | -9.06  | 4.09  | 2.70E-02 | -12.04 | 5.56  | 3.03E-02 | -8.13   | 9.42   | 3.88E-01 | -24.77 | 23.50 | 2.92E-01 | -0.99  | 8.39  | 9.06E-01 |
| cg05557991 | 7.50   | 3.39  | 2.70E-02 | 5.09   | 4.90  | 2.99E-01 | 14.52   | 6.84   | 3.37E-02 | 7.90   | 9.62  | 4.12E-01 | 3.37   | 8.73  | 6.99E-01 |
| cg16872028 | 15.61  | 7.06  | 2.70E-02 | 15.69  | 14.01 | 2.63E-01 | 43.57   | 42.26  | 3.02E-01 | 18.28  | 8.93  | 4.07E-02 | -10.79 | 23.10 | 6.40E-01 |
| cg06760830 | 13.24  | 5.99  | 2.70E-02 | 15.99  | 8.72  | 6.68E-02 | 9.18    | 15.42  | 5.52E-01 | 29.79  | 21.45 | 1.65E-01 | 6.67   | 10.92 | 5.41E-01 |
| cg13543254 | -13.90 | 6.29  | 2.70E-02 | -17.44 | 9.62  | 6.98E-02 | -8.57   | 14.07  | 5.42E-01 | 4.91   | 18.87 | 7.95E-01 | -20.13 | 12.27 | 1.01E-01 |
| cg23248424 | -1.93  | 0.87  | 2.70E-02 | -2.71  | 1.25  | 3.09E-02 | -1.06   | 2.04   | 6.05E-01 | -3.42  | 2.17  | 1.15E-01 | 0.79   | 2.14  | 7.11E-01 |
| cg01882113 | -18.98 | 8.58  | 2.70E-02 | -28.54 | 13.05 | 2.87E-02 | -34.71  | 20.59  | 9.18E-02 | 4.87   | 16.89 | 7.73E-01 | -15.76 | 19.60 | 4.21E-01 |
| cg25244008 | -45.46 | 20.56 | 2.70E-02 | -45.26 | 22.77 | 4.68E-02 | -41.42  | 71.69  | 5.63E-01 | 80.92  | 79.02 | 3.06E-01 | -77.68 | 36.85 | 3.50E-02 |

|            |        |       |          |        |       |          |         |        |          |        |       |          |        |       |          |
|------------|--------|-------|----------|--------|-------|----------|---------|--------|----------|--------|-------|----------|--------|-------|----------|
| cg08901901 | 18.75  | 8.48  | 2.70E-02 | 25.92  | 14.08 | 6.55E-02 | -27.12  | 39.93  | 4.97E-01 | 34.34  | 42.63 | 4.21E-01 | 16.67  | 11.41 | 1.44E-01 |
| cg23200506 | -12.99 | 5.87  | 2.70E-02 | -23.03 | 8.82  | 9.02E-03 | 0.56    | 12.94  | 9.65E-01 | -12.78 | 18.88 | 4.99E-01 | -6.53  | 11.67 | 5.76E-01 |
| cg27608981 | 15.86  | 7.17  | 2.70E-02 | 0.49   | 16.99 | 9.77E-01 | 1.12    | 23.08  | 9.61E-01 | 23.52  | 8.96  | 8.67E-03 | 7.05   | 24.75 | 7.76E-01 |
| cg00255925 | 22.48  | 10.17 | 2.70E-02 | 6.06   | 30.65 | 8.43E-01 | -3.90   | 143.71 | 9.78E-01 | 23.32  | 11.26 | 3.83E-02 | 40.66  | 38.64 | 2.93E-01 |
| cg16373023 | -49.05 | 22.18 | 2.70E-02 | -43.61 | 28.75 | 1.29E-01 | -37.30  | 95.45  | 6.96E-01 | -84.41 | 65.43 | 1.97E-01 | -48.25 | 45.71 | 2.91E-01 |
| cg25942572 | -13.65 | 6.17  | 2.70E-02 | -28.41 | 13.75 | 3.88E-02 | -10.25  | 15.27  | 5.02E-01 | -10.28 | 8.29  | 2.15E-01 | -6.82  | 21.79 | 7.54E-01 |
| cg23242489 | 10.63  | 4.81  | 2.70E-02 | 12.06  | 7.48  | 1.07E-01 | 9.93    | 8.89   | 2.64E-01 | 6.77   | 12.02 | 5.73E-01 | 12.39  | 13.15 | 3.46E-01 |
| cg24939196 | -10.80 | 4.89  | 2.70E-02 | -14.54 | 6.89  | 3.48E-02 | -2.87   | 11.46  | 8.02E-01 | -4.66  | 15.86 | 7.69E-01 | -11.45 | 10.40 | 2.71E-01 |
| cg18586891 | 13.23  | 5.98  | 2.70E-02 | 11.74  | 8.39  | 1.61E-01 | 14.14   | 11.83  | 2.32E-01 | 13.95  | 18.53 | 4.52E-01 | 16.63  | 16.50 | 3.14E-01 |
| cg14316305 | 20.06  | 9.07  | 2.70E-02 | 8.86   | 16.78 | 5.98E-01 | 23.12   | 20.59  | 2.62E-01 | 13.38  | 15.14 | 3.77E-01 | 53.03  | 23.11 | 2.17E-02 |
| cg10641986 | 42.19  | 19.08 | 2.70E-02 | 47.85  | 55.69 | 3.90E-01 | 123.49  | 203.93 | 5.45E-01 | 35.32  | 21.60 | 1.02E-01 | 84.82  | 62.41 | 1.74E-01 |
| cg08989932 | -43.80 | 19.81 | 2.70E-02 | -24.56 | 59.06 | 6.78E-01 | -163.16 | 228.29 | 4.75E-01 | -46.69 | 22.15 | 3.51E-02 | -30.82 | 69.78 | 6.59E-01 |
| cg14926717 | 33.96  | 15.36 | 2.70E-02 | 24.05  | 29.91 | 4.21E-01 | 105.77  | 88.82  | 2.34E-01 | 17.61  | 9.89  | 7.50E-02 | 70.85  | 25.71 | 5.86E-03 |
| cg12905574 | -29.86 | 13.50 | 2.70E-02 | -8.04  | 49.32 | 8.71E-01 | 8.25    | 225.14 | 9.71E-01 | -33.41 | 14.45 | 2.08E-02 | -2.53  | 61.29 | 9.67E-01 |
| cg17181167 | 33.36  | 15.09 | 2.70E-02 | 6.26   | 11.72 | 5.93E-01 | 56.50   | 24.65  | 2.19E-02 | 56.17  | 44.19 | 2.04E-01 | 46.71  | 19.91 | 1.90E-02 |
| cg23374863 | -7.20  | 3.26  | 2.70E-02 | -6.26  | 5.08  | 2.18E-01 | -12.99  | 6.44   | 4.36E-02 | -0.52  | 9.48  | 9.56E-01 | -5.79  | 7.01  | 4.09E-01 |
| cg11165391 | -13.28 | 6.01  | 2.70E-02 | -18.01 | 15.87 | 2.56E-01 | -15.46  | 30.91  | 6.17E-01 | -11.72 | 7.00  | 9.43E-02 | -17.98 | 20.84 | 3.88E-01 |
| cg11581627 | 30.04  | 13.59 | 2.70E-02 | 25.84  | 18.72 | 1.67E-01 | 72.56   | 39.56  | 6.66E-02 | 30.61  | 35.77 | 3.92E-01 | 16.33  | 29.61 | 5.81E-01 |
| cg14210726 | 6.38   | 2.88  | 2.70E-02 | 4.80   | 3.45  | 1.64E-01 | 15.09   | 7.90   | 5.62E-02 | 4.41   | 11.57 | 7.03E-01 | 6.99   | 8.93  | 4.34E-01 |
| cg11609366 | -41.18 | 18.63 | 2.71E-02 | -46.70 | 23.17 | 4.39E-02 | -136.08 | 92.47  | 1.41E-01 | 42.39  | 68.92 | 5.39E-01 | -35.70 | 38.01 | 3.48E-01 |
| cg15398152 | 10.88  | 4.92  | 2.71E-02 | 6.21   | 6.84  | 3.64E-01 | 17.77   | 10.33  | 8.54E-02 | 15.18  | 17.66 | 3.90E-01 | 13.75  | 11.64 | 2.38E-01 |
| cg25345722 | -11.05 | 5.00  | 2.71E-02 | -8.60  | 7.06  | 2.23E-01 | -22.41  | 10.52  | 3.31E-02 | 4.09   | 14.53 | 7.78E-01 | -13.99 | 12.72 | 2.72E-01 |
| cg03739877 | 19.41  | 8.78  | 2.71E-02 | 22.02  | 14.87 | 1.39E-01 | 15.59   | 16.29  | 3.39E-01 | 19.89  | 19.27 | 3.02E-01 | 20.04  | 22.39 | 3.71E-01 |
| cg02794788 | 12.25  | 5.54  | 2.71E-02 | 3.59   | 16.76 | 8.31E-01 | 27.34   | 26.71  | 3.06E-01 | 12.09  | 6.20  | 5.11E-02 | 21.42  | 25.53 | 4.02E-01 |
| cg21192185 | 15.30  | 6.92  | 2.71E-02 | 21.40  | 20.31 | 2.92E-01 | 13.60   | 21.67  | 5.30E-01 | 13.06  | 8.17  | 1.10E-01 | 32.11  | 27.45 | 2.42E-01 |
| cg15689513 | 19.79  | 8.95  | 2.71E-02 | 32.03  | 17.13 | 6.15E-02 | 9.51    | 15.44  | 5.38E-01 | 6.94   | 18.82 | 7.12E-01 | 38.26  | 22.12 | 8.36E-02 |
| cg07018260 | 7.11   | 3.22  | 2.71E-02 | 5.32   | 7.96  | 5.04E-01 | 17.34   | 11.06  | 1.17E-01 | 7.33   | 3.91  | 6.04E-02 | -2.60  | 11.76 | 8.25E-01 |
| cg26311932 | -14.51 | 6.56  | 2.71E-02 | -11.45 | 8.72  | 1.89E-01 | -19.94  | 17.21  | 2.47E-01 | -13.75 | 23.45 | 5.58E-01 | -19.31 | 14.34 | 1.78E-01 |
| cg22034203 | 4.68   | 2.12  | 2.71E-02 | 8.14   | 3.56  | 2.24E-02 | -0.46   | 4.45   | 9.18E-01 | 5.79   | 3.81  | 1.29E-01 | 1.11   | 6.32  | 8.61E-01 |
| cg02273944 | 15.93  | 7.21  | 2.71E-02 | 22.20  | 10.91 | 4.19E-02 | 5.89    | 14.19  | 6.78E-01 | 9.23   | 18.11 | 6.10E-01 | 22.21  | 18.83 | 2.38E-01 |
| cg11420192 | 38.34  | 17.34 | 2.71E-02 | 52.46  | 25.09 | 3.66E-02 | 23.51   | 41.71  | 5.73E-01 | -16.77 | 43.73 | 7.01E-01 | 61.68  | 39.58 | 1.19E-01 |
| cg03895593 | 9.39   | 4.25  | 2.71E-02 | 10.35  | 7.14  | 1.47E-01 | 16.33   | 9.58   | 8.82E-02 | 10.76  | 8.87  | 2.25E-01 | 0.23   | 9.05  | 9.80E-01 |
| cg05985134 | 31.69  | 14.34 | 2.71E-02 | 51.59  | 35.99 | 1.52E-01 | -111.31 | 103.40 | 2.82E-01 | 31.84  | 16.56 | 5.45E-02 | 24.51  | 53.17 | 6.45E-01 |
| cg23486142 | 26.56  | 12.02 | 2.71E-02 | 28.14  | 15.22 | 6.44E-02 | 34.27   | 46.23  | 4.58E-01 | 91.34  | 55.10 | 9.74E-02 | 8.99   | 23.52 | 7.02E-01 |
| cg10437839 | 7.65   | 3.46  | 2.71E-02 | 7.64   | 4.59  | 9.60E-02 | 15.34   | 8.17   | 6.04E-02 | 10.63  | 10.12 | 2.93E-01 | -5.06  | 9.39  | 5.90E-01 |

|            |        |       |          |        |       |          |         |        |          |         |       |          |        |       |          |
|------------|--------|-------|----------|--------|-------|----------|---------|--------|----------|---------|-------|----------|--------|-------|----------|
| cg02514318 | -8.29  | 3.75  | 2.71E-02 | -13.78 | 8.80  | 1.18E-01 | -15.19  | 15.02  | 3.12E-01 | -7.14   | 4.56  | 1.17E-01 | -0.07  | 13.32 | 9.96E-01 |
| cg07939836 | 24.94  | 11.28 | 2.71E-02 | 58.24  | 29.32 | 4.70E-02 | -15.32  | 89.64  | 8.64E-01 | 21.76   | 13.25 | 1.00E-01 | 6.96   | 33.95 | 8.38E-01 |
| cg16531924 | -28.70 | 12.98 | 2.71E-02 | -20.73 | 15.93 | 1.93E-01 | -81.93  | 69.62  | 2.39E-01 | -58.11  | 47.63 | 2.22E-01 | -34.27 | 27.30 | 2.09E-01 |
| cg12471986 | 15.29  | 6.92  | 2.71E-02 | 21.12  | 9.28  | 2.28E-02 | 16.74   | 23.08  | 4.68E-01 | 23.97   | 21.09 | 2.56E-01 | -2.19  | 13.95 | 8.75E-01 |
| cg25486145 | 22.99  | 10.40 | 2.71E-02 | 14.46  | 23.41 | 5.37E-01 | 9.34    | 29.79  | 7.54E-01 | 20.95   | 13.43 | 1.19E-01 | 79.95  | 36.71 | 2.94E-02 |
| cg14850660 | -10.54 | 4.77  | 2.71E-02 | -24.47 | 12.48 | 4.99E-02 | -19.21  | 17.01  | 2.59E-01 | -8.25   | 5.88  | 1.61E-01 | -0.22  | 13.96 | 9.87E-01 |
| cg03386480 | 25.96  | 11.75 | 2.71E-02 | 20.66  | 14.30 | 1.49E-01 | 38.96   | 74.68  | 6.02E-01 | 91.38   | 62.34 | 1.43E-01 | 29.51  | 22.83 | 1.96E-01 |
| cg07111554 | 15.56  | 7.04  | 2.71E-02 | 33.44  | 15.39 | 2.98E-02 | 4.71    | 17.57  | 7.89E-01 | 15.91   | 9.65  | 9.92E-02 | -6.80  | 22.51 | 7.63E-01 |
| cg26804891 | 9.30   | 4.21  | 2.71E-02 | 12.70  | 6.12  | 3.82E-02 | 9.86    | 9.42   | 2.95E-01 | 1.41    | 9.38  | 8.80E-01 | 8.30   | 11.83 | 4.83E-01 |
| cg16437211 | -8.00  | 3.62  | 2.71E-02 | -14.07 | 5.54  | 1.10E-02 | -4.71   | 8.25   | 5.68E-01 | -6.28   | 10.65 | 5.55E-01 | -1.33  | 7.03  | 8.50E-01 |
| cg14991769 | 6.78   | 3.07  | 2.71E-02 | 6.37   | 4.24  | 1.33E-01 | 8.56    | 6.23   | 1.69E-01 | 7.46    | 10.34 | 4.71E-01 | 4.90   | 8.06  | 5.43E-01 |
| cg09257735 | 10.80  | 4.89  | 2.71E-02 | 7.13   | 8.68  | 4.12E-01 | 13.45   | 12.57  | 2.84E-01 | 18.64   | 8.55  | 2.94E-02 | 2.07   | 10.77 | 8.48E-01 |
| cg01852186 | -7.12  | 3.22  | 2.71E-02 | -11.35 | 5.99  | 5.82E-02 | -3.73   | 10.60  | 7.25E-01 | -5.73   | 4.70  | 2.22E-01 | -5.37  | 8.37  | 5.21E-01 |
| cg15962336 | 18.31  | 8.29  | 2.71E-02 | 35.21  | 13.47 | 8.92E-03 | 11.76   | 18.35  | 5.22E-01 | 17.45   | 14.99 | 2.44E-01 | -4.82  | 18.76 | 7.97E-01 |
| cg10834721 | -50.23 | 22.73 | 2.71E-02 | -44.24 | 30.13 | 1.42E-01 | -33.19  | 102.84 | 7.47E-01 | -175.91 | 85.69 | 4.01E-02 | -35.46 | 40.71 | 3.84E-01 |
| cg19894747 | 32.97  | 14.92 | 2.71E-02 | 54.47  | 32.97 | 9.85E-02 | -149.58 | 163.78 | 3.61E-01 | 20.32   | 10.81 | 6.01E-02 | 66.33  | 31.76 | 3.67E-02 |
| cg19472770 | 14.98  | 6.78  | 2.71E-02 | 16.77  | 9.82  | 8.78E-02 | 4.67    | 16.42  | 7.76E-01 | 21.06   | 16.97 | 2.15E-01 | 14.66  | 15.42 | 3.42E-01 |
| cg11762213 | 11.59  | 5.24  | 2.71E-02 | 9.97   | 7.24  | 1.68E-01 | 16.68   | 11.56  | 1.49E-01 | 15.45   | 17.44 | 3.75E-01 | 8.52   | 12.38 | 4.91E-01 |
| cg25654677 | -17.15 | 7.76  | 2.71E-02 | -13.94 | 12.14 | 2.51E-01 | -25.64  | 15.84  | 1.05E-01 | -9.73   | 17.36 | 5.75E-01 | -22.17 | 19.98 | 2.67E-01 |
| cg01757168 | 5.12   | 2.32  | 2.71E-02 | 7.51   | 3.32  | 2.39E-02 | -1.82   | 5.08   | 7.20E-01 | 10.65   | 7.65  | 1.64E-01 | 4.08   | 5.01  | 4.16E-01 |
| cg17819489 | -15.31 | 6.93  | 2.71E-02 | -18.58 | 14.97 | 2.15E-01 | 13.05   | 36.65  | 7.22E-01 | -19.04  | 8.67  | 2.81E-02 | 3.25   | 20.73 | 8.76E-01 |
| cg00634652 | -19.59 | 8.87  | 2.72E-02 | -26.42 | 12.61 | 3.62E-02 | 6.92    | 25.70  | 7.88E-01 | -20.12  | 34.83 | 5.64E-01 | -18.81 | 15.65 | 2.29E-01 |
| cg04765483 | 11.57  | 5.24  | 2.72E-02 | 10.72  | 8.37  | 2.00E-01 | 5.33    | 12.18  | 6.62E-01 | 14.37   | 10.79 | 1.83E-01 | 15.99  | 12.10 | 1.86E-01 |
| cg07459650 | 27.29  | 12.35 | 2.72E-02 | 27.53  | 18.08 | 1.28E-01 | 27.20   | 25.21  | 2.81E-01 | 46.80   | 37.69 | 2.14E-01 | 15.51  | 28.69 | 5.89E-01 |
| cg07772781 | 8.24   | 3.73  | 2.72E-02 | 13.62  | 5.63  | 1.56E-02 | 5.61    | 7.49   | 4.54E-01 | 0.89    | 5.21  | 8.65E-01 | 16.68  | 8.47  | 4.90E-02 |
| cg06910299 | 18.87  | 8.54  | 2.72E-02 | 18.38  | 17.56 | 2.95E-01 | 61.21   | 78.18  | 4.34E-01 | 18.78   | 10.41 | 7.13E-02 | 14.68  | 30.42 | 6.29E-01 |
| cg21272996 | 6.82   | 3.09  | 2.72E-02 | 6.17   | 4.10  | 1.33E-01 | 12.09   | 7.01   | 8.47E-02 | 16.55   | 10.80 | 1.25E-01 | -2.36  | 7.77  | 7.62E-01 |
| cg02434007 | -11.55 | 5.23  | 2.72E-02 | -10.91 | 7.16  | 1.28E-01 | -17.98  | 12.20  | 1.41E-01 | 0.35    | 21.71 | 9.87E-01 | -10.89 | 11.01 | 3.23E-01 |
| cg24372325 | 44.27  | 20.04 | 2.72E-02 | 5.43   | 49.90 | 9.13E-01 | 324.58  | 269.58 | 2.29E-01 | 53.56   | 23.44 | 2.23E-02 | 23.96  | 62.66 | 7.02E-01 |
| cg22270027 | 6.68   | 3.02  | 2.72E-02 | 3.00   | 4.50  | 5.05E-01 | 6.91    | 5.63   | 2.20E-01 | 13.36   | 9.11  | 1.42E-01 | 12.38  | 7.80  | 1.13E-01 |
| cg13543355 | -19.25 | 8.72  | 2.72E-02 | -13.32 | 11.62 | 2.52E-01 | -43.47  | 25.15  | 8.40E-02 | -5.68   | 27.70 | 8.38E-01 | -27.36 | 18.64 | 1.42E-01 |
| cg01878435 | 21.33  | 9.66  | 2.72E-02 | 24.36  | 14.02 | 8.24E-02 | 44.14   | 34.18  | 1.97E-01 | 31.94   | 26.60 | 2.30E-01 | 6.52   | 17.22 | 7.05E-01 |
| cg12351068 | -15.97 | 7.23  | 2.72E-02 | -24.63 | 18.48 | 1.83E-01 | 1.09    | 37.89  | 9.77E-01 | -12.35  | 8.53  | 1.48E-01 | -36.46 | 23.79 | 1.25E-01 |
| cg07567612 | -21.80 | 9.87  | 2.72E-02 | -19.30 | 20.93 | 3.57E-01 | -25.31  | 39.14  | 5.18E-01 | -21.10  | 12.83 | 1.00E-01 | -27.87 | 28.18 | 3.23E-01 |
| cg02568619 | 26.83  | 12.15 | 2.72E-02 | 37.20  | 18.84 | 4.83E-02 | 56.06   | 19.95  | 4.95E-03 | 8.93    | 13.35 | 5.03E-01 | 3.95   | 30.10 | 8.96E-01 |

|            |        |       |          |        |       |          |         |        |          |        |       |          |        |       |          |
|------------|--------|-------|----------|--------|-------|----------|---------|--------|----------|--------|-------|----------|--------|-------|----------|
| cg06754565 | -58.59 | 26.53 | 2.72E-02 | -64.78 | 35.59 | 6.87E-02 | -64.80  | 108.79 | 5.51E-01 | -4.52  | 79.21 | 9.54E-01 | -66.88 | 50.83 | 1.88E-01 |
| cg20631628 | 77.10  | 34.91 | 2.72E-02 | 24.65  | 30.64 | 4.21E-01 | 108.87  | 138.95 | 4.33E-01 | 89.63  | 69.81 | 1.99E-01 | 146.02 | 49.79 | 3.36E-03 |
| cg08378342 | 15.80  | 7.15  | 2.72E-02 | 17.18  | 12.27 | 1.61E-01 | 3.76    | 19.15  | 8.44E-01 | 28.05  | 14.09 | 4.64E-02 | 8.36   | 13.96 | 5.49E-01 |
| cg24237081 | 22.04  | 9.98  | 2.72E-02 | 20.97  | 15.71 | 1.82E-01 | 16.05   | 25.84  | 5.35E-01 | 54.46  | 31.03 | 7.92E-02 | 16.14  | 17.01 | 3.43E-01 |
| cg25608078 | 46.62  | 21.11 | 2.72E-02 | 57.83  | 26.54 | 2.93E-02 | -52.96  | 89.34  | 5.53E-01 | 45.31  | 70.56 | 5.21E-01 | 40.24  | 44.80 | 3.69E-01 |
| cg06376558 | -14.87 | 6.73  | 2.72E-02 | -24.39 | 11.14 | 2.85E-02 | -3.04   | 14.17  | 8.30E-01 | -11.68 | 15.37 | 4.47E-01 | -13.95 | 14.45 | 3.34E-01 |
| cg19932079 | -10.86 | 4.92  | 2.72E-02 | -9.43  | 8.83  | 2.86E-01 | -12.76  | 10.47  | 2.23E-01 | -8.38  | 9.13  | 3.58E-01 | -15.05 | 11.65 | 1.97E-01 |
| cg23104592 | -15.54 | 7.04  | 2.72E-02 | -11.53 | 9.45  | 2.22E-01 | -20.62  | 16.92  | 2.23E-01 | 9.64   | 18.57 | 6.04E-01 | -29.29 | 11.48 | 1.08E-02 |
| cg06867478 | 14.18  | 6.42  | 2.72E-02 | 18.45  | 9.74  | 5.82E-02 | 14.88   | 13.79  | 2.81E-01 | 5.91   | 17.07 | 7.29E-01 | 10.14  | 14.13 | 4.73E-01 |
| cg08849294 | 13.10  | 5.94  | 2.72E-02 | 16.34  | 8.98  | 6.87E-02 | 18.53   | 12.13  | 1.27E-01 | 9.78   | 17.72 | 5.81E-01 | 2.04   | 12.91 | 8.74E-01 |
| cg04741094 | -11.61 | 5.26  | 2.72E-02 | -12.72 | 11.62 | 2.74E-01 | 1.04    | 19.99  | 9.58E-01 | -13.48 | 6.74  | 4.55E-02 | -7.44  | 15.31 | 6.27E-01 |
| cg23421970 | -57.98 | 26.26 | 2.72E-02 | -25.23 | 48.29 | 6.01E-01 | -132.05 | 318.47 | 6.78E-01 | -78.41 | 34.47 | 2.29E-02 | -35.05 | 76.77 | 6.48E-01 |
| cg14753094 | -15.10 | 6.84  | 2.73E-02 | -17.56 | 14.47 | 2.25E-01 | -1.30   | 17.93  | 9.42E-01 | -17.62 | 9.39  | 6.06E-02 | -16.25 | 21.50 | 4.50E-01 |
| cg12934461 | 16.72  | 7.57  | 2.73E-02 | 9.80   | 27.76 | 7.24E-01 | 28.78   | 23.68  | 2.24E-01 | 11.39  | 9.60  | 2.35E-01 | 29.71  | 16.92 | 7.90E-02 |
| cg17888554 | 11.55  | 5.23  | 2.73E-02 | 10.54  | 7.73  | 1.73E-01 | 13.48   | 11.89  | 2.57E-01 | 0.08   | 15.77 | 9.96E-01 | 17.17  | 10.69 | 1.08E-01 |
| cg11118615 | 13.27  | 6.01  | 2.73E-02 | 16.34  | 10.29 | 1.12E-01 | 17.16   | 10.67  | 1.08E-01 | 8.16   | 13.91 | 5.57E-01 | 4.71   | 15.25 | 7.58E-01 |
| cg23032421 | -10.28 | 4.65  | 2.73E-02 | -5.28  | 7.42  | 4.77E-01 | -14.40  | 10.15  | 1.56E-01 | -3.26  | 10.31 | 7.52E-01 | -23.36 | 10.59 | 2.74E-02 |
| cg00471159 | 13.31  | 6.03  | 2.73E-02 | 13.19  | 9.13  | 1.49E-01 | 0.63    | 12.96  | 9.61E-01 | 23.23  | 21.98 | 2.91E-01 | 20.84  | 11.55 | 7.12E-02 |
| cg07014308 | 7.20   | 3.26  | 2.73E-02 | 10.18  | 4.39  | 2.04E-02 | -3.08   | 8.00   | 7.00E-01 | 15.27  | 9.06  | 9.20E-02 | 3.73   | 6.56  | 5.70E-01 |
| cg02560973 | 24.87  | 11.26 | 2.73E-02 | 37.25  | 13.79 | 6.90E-03 | -3.80   | 44.59  | 9.32E-01 | 66.56  | 44.75 | 1.37E-01 | 6.13   | 16.63 | 7.12E-01 |
| cg09454997 | -21.66 | 9.81  | 2.73E-02 | -5.62  | 22.99 | 8.07E-01 | 9.37    | 50.06  | 8.52E-01 | -27.42 | 12.13 | 2.38E-02 | -24.40 | 27.74 | 3.79E-01 |
| cg12128149 | -42.84 | 19.41 | 2.73E-02 | -46.54 | 29.39 | 1.13E-01 | -29.53  | 49.41  | 5.50E-01 | -49.20 | 36.96 | 1.83E-01 | -33.07 | 52.98 | 5.32E-01 |
| cg19439043 | 6.10   | 2.76  | 2.73E-02 | 6.70   | 3.79  | 7.74E-02 | 9.39    | 6.27   | 1.35E-01 | 3.43   | 8.07  | 6.71E-01 | 2.05   | 6.92  | 7.67E-01 |
| cg14182820 | 6.85   | 3.10  | 2.73E-02 | 4.40   | 6.38  | 4.91E-01 | -0.68   | 9.75   | 9.44E-01 | 10.78  | 4.17  | 9.79E-03 | -0.78  | 9.43  | 9.34E-01 |
| cg07340651 | -11.66 | 5.28  | 2.73E-02 | -16.54 | 8.98  | 6.54E-02 | -7.76   | 12.02  | 5.19E-01 | -11.15 | 9.65  | 2.48E-01 | -6.81  | 13.14 | 6.04E-01 |
| cg27576259 | 10.12  | 4.58  | 2.73E-02 | 7.58   | 5.99  | 2.06E-01 | 23.68   | 11.20  | 3.44E-02 | 10.41  | 15.31 | 4.97E-01 | 4.95   | 11.55 | 6.68E-01 |
| cg21158528 | -10.24 | 4.64  | 2.73E-02 | -13.42 | 7.45  | 7.18E-02 | -6.48   | 10.64  | 5.42E-01 | -13.40 | 10.09 | 1.84E-01 | -4.63  | 10.11 | 6.47E-01 |
| cg13411122 | 24.61  | 11.15 | 2.73E-02 | 37.38  | 14.73 | 1.12E-02 | 11.46   | 29.62  | 6.99E-01 | 30.25  | 39.09 | 4.39E-01 | -4.24  | 24.63 | 8.63E-01 |
| cg10009497 | 7.86   | 3.56  | 2.73E-02 | 6.53   | 5.07  | 1.98E-01 | 19.65   | 9.63   | 4.13E-02 | 4.52   | 8.27  | 5.85E-01 | 6.04   | 8.28  | 4.65E-01 |
| cg18828619 | 11.28  | 5.11  | 2.73E-02 | 15.10  | 7.35  | 3.99E-02 | 14.83   | 11.80  | 2.09E-01 | 6.27   | 11.94 | 5.99E-01 | 0.37   | 13.35 | 9.78E-01 |
| cg18723442 | 7.68   | 3.48  | 2.73E-02 | 14.21  | 5.42  | 8.71E-03 | 8.83    | 6.55   | 1.78E-01 | 4.33   | 7.79  | 5.78E-01 | -1.71  | 7.26  | 8.14E-01 |
| cg12492380 | 17.58  | 7.96  | 2.73E-02 | 23.67  | 14.50 | 1.03E-01 | 22.36   | 17.25  | 1.95E-01 | 10.29  | 12.73 | 4.19E-01 | 17.56  | 26.00 | 4.99E-01 |
| cg07168939 | 12.37  | 5.60  | 2.73E-02 | 10.70  | 7.68  | 1.63E-01 | 16.54   | 12.99  | 2.03E-01 | -12.03 | 20.35 | 5.54E-01 | 21.86  | 12.34 | 7.64E-02 |
| cg00055603 | -8.36  | 3.79  | 2.73E-02 | -1.27  | 7.76  | 8.70E-01 | 3.13    | 10.34  | 7.62E-01 | -13.57 | 4.29  | 1.55E-03 | -9.53  | 9.21  | 3.01E-01 |
| cg22257099 | 23.53  | 10.66 | 2.73E-02 | 33.83  | 14.23 | 1.75E-02 | 33.11   | 33.35  | 3.21E-01 | 12.28  | 32.28 | 7.04E-01 | -0.74  | 22.34 | 9.74E-01 |

|            |        |       |          |        |       |          |        |        |          |         |       |          |        |       |          |
|------------|--------|-------|----------|--------|-------|----------|--------|--------|----------|---------|-------|----------|--------|-------|----------|
| cg17701942 | -13.92 | 6.30  | 2.73E-02 | -8.06  | 12.57 | 5.22E-01 | -17.85 | 16.43  | 2.77E-01 | -11.10  | 8.60  | 1.97E-01 | -52.17 | 25.11 | 3.77E-02 |
| cg27638196 | 10.45  | 4.73  | 2.73E-02 | 16.89  | 6.72  | 1.19E-02 | 0.53   | 11.24  | 9.62E-01 | 19.74   | 15.01 | 1.89E-01 | 1.13   | 9.50  | 9.05E-01 |
| cg07691624 | 9.65   | 4.37  | 2.73E-02 | 16.72  | 8.34  | 4.50E-02 | 21.65  | 11.59  | 6.19E-02 | 4.23    | 6.16  | 4.93E-01 | 0.13   | 13.80 | 9.93E-01 |
| cg01844866 | -34.31 | 15.54 | 2.73E-02 | -39.93 | 21.34 | 6.14E-02 | -17.56 | 51.60  | 7.34E-01 | -27.02  | 47.78 | 5.72E-01 | -31.79 | 29.76 | 2.85E-01 |
| cg14000467 | 9.37   | 4.25  | 2.73E-02 | 4.79   | 5.66  | 3.97E-01 | 14.74  | 8.08   | 6.82E-02 | 19.93   | 23.48 | 3.96E-01 | 15.29  | 11.87 | 1.98E-01 |
| cg24570303 | 29.08  | 13.17 | 2.73E-02 | 32.15  | 20.87 | 1.23E-01 | 13.38  | 52.36  | 7.98E-01 | 23.75   | 37.47 | 5.26E-01 | 30.11  | 20.46 | 1.41E-01 |
| cg13277940 | -32.95 | 14.93 | 2.73E-02 | -35.88 | 16.33 | 2.80E-02 | -90.34 | 124.02 | 4.66E-01 | 109.62  | 92.32 | 2.35E-01 | -36.64 | 42.59 | 3.90E-01 |
| cg22688535 | -12.02 | 5.45  | 2.73E-02 | -16.84 | 15.02 | 2.62E-01 | 9.29   | 20.56  | 6.51E-01 | -14.76  | 6.38  | 2.07E-02 | 4.29   | 20.64 | 8.35E-01 |
| cg24311251 | 17.63  | 7.99  | 2.73E-02 | 23.53  | 13.50 | 8.14E-02 | 2.19   | 28.15  | 9.38E-01 | 16.08   | 11.95 | 1.78E-01 | 16.58  | 22.84 | 4.68E-01 |
| cg13954297 | -30.00 | 13.59 | 2.73E-02 | -38.31 | 27.85 | 1.69E-01 | -37.25 | 184.30 | 8.40E-01 | -24.21  | 16.46 | 1.41E-01 | -55.98 | 49.89 | 2.62E-01 |
| cg24980158 | -9.49  | 4.30  | 2.73E-02 | -15.67 | 8.09  | 5.29E-02 | 1.33   | 15.89  | 9.33E-01 | -8.24   | 5.84  | 1.58E-01 | -6.79  | 13.37 | 6.12E-01 |
| cg05671636 | 11.61  | 5.26  | 2.73E-02 | 16.27  | 7.94  | 4.06E-02 | 5.39   | 11.47  | 6.39E-01 | 13.52   | 11.65 | 2.46E-01 | 3.97   | 13.74 | 7.73E-01 |
| cg00855901 | 8.41   | 3.81  | 2.73E-02 | 11.72  | 5.16  | 2.31E-02 | 13.34  | 9.64   | 1.66E-01 | 0.00    | 12.53 | 1.00E+00 | -0.35  | 8.41  | 9.67E-01 |
| cg22411165 | -13.70 | 6.21  | 2.73E-02 | -22.09 | 16.80 | 1.89E-01 | -6.61  | 25.20  | 7.93E-01 | -9.20   | 7.98  | 2.49E-01 | -23.84 | 13.96 | 8.78E-02 |
| cg26134665 | 13.89  | 6.30  | 2.73E-02 | 12.96  | 8.98  | 1.49E-01 | 28.94  | 13.32  | 2.98E-02 | 6.44    | 24.34 | 7.91E-01 | 2.87   | 13.48 | 8.32E-01 |
| cg05426485 | 18.12  | 8.21  | 2.73E-02 | 14.92  | 12.42 | 2.30E-01 | 12.61  | 20.53  | 5.39E-01 | 42.75   | 22.52 | 5.77E-02 | 14.44  | 15.79 | 3.60E-01 |
| cg02339122 | -11.52 | 5.22  | 2.73E-02 | -16.91 | 8.32  | 4.20E-02 | -10.39 | 12.62  | 4.10E-01 | -7.00   | 11.20 | 5.32E-01 | -7.16  | 11.21 | 5.23E-01 |
| cg12480903 | 10.98  | 4.98  | 2.73E-02 | 14.35  | 7.70  | 6.25E-02 | 4.79   | 12.66  | 7.05E-01 | 21.04   | 14.69 | 1.52E-01 | 5.86   | 8.89  | 5.10E-01 |
| cg19380675 | -7.58  | 3.44  | 2.73E-02 | -13.16 | 5.97  | 2.75E-02 | -7.29  | 6.64   | 2.72E-01 | -7.28   | 6.54  | 2.65E-01 | 5.94   | 9.72  | 5.41E-01 |
| cg11786338 | -8.22  | 3.72  | 2.73E-02 | -11.67 | 7.56  | 1.23E-01 | -16.62 | 12.94  | 1.99E-01 | -7.80   | 5.03  | 1.21E-01 | 2.03   | 10.44 | 8.46E-01 |
| cg24650940 | 10.40  | 4.71  | 2.73E-02 | 13.95  | 6.70  | 3.75E-02 | 20.85  | 11.84  | 7.81E-02 | 5.43    | 11.76 | 6.44E-01 | -3.59  | 10.91 | 7.42E-01 |
| cg11623293 | 21.84  | 9.90  | 2.74E-02 | 33.53  | 15.34 | 2.88E-02 | 24.66  | 19.97  | 2.17E-01 | 9.39    | 21.76 | 6.66E-01 | -0.93  | 27.37 | 9.73E-01 |
| cg10146663 | -39.06 | 17.70 | 2.74E-02 | -18.72 | 23.41 | 4.24E-01 | -64.62 | 46.56  | 1.65E-01 | -63.04  | 75.94 | 4.06E-01 | -67.99 | 36.98 | 6.60E-02 |
| cg12231584 | 16.44  | 7.45  | 2.74E-02 | 24.67  | 18.85 | 1.91E-01 | 29.84  | 21.82  | 1.71E-01 | 10.15   | 9.22  | 2.71E-01 | 33.58  | 27.43 | 2.21E-01 |
| cg01739167 | -14.93 | 6.76  | 2.74E-02 | -18.68 | 9.66  | 5.30E-02 | -7.97  | 17.42  | 6.47E-01 | -8.89   | 16.20 | 5.83E-01 | -16.33 | 15.77 | 3.00E-01 |
| cg03048354 | -54.36 | 24.64 | 2.74E-02 | -68.80 | 31.73 | 3.01E-02 | -76.31 | 116.08 | 5.11E-01 | -113.12 | 73.82 | 1.25E-01 | 13.18  | 50.23 | 7.93E-01 |
| cg13149147 | 8.93   | 4.05  | 2.74E-02 | 9.01   | 5.53  | 1.03E-01 | 16.91  | 10.65  | 1.12E-01 | 9.91    | 10.12 | 3.28E-01 | 0.46   | 10.14 | 9.64E-01 |
| cg19589396 | -9.55  | 4.33  | 2.74E-02 | -14.60 | 6.64  | 2.79E-02 | -1.27  | 9.44   | 8.93E-01 | -5.90   | 10.29 | 5.66E-01 | -10.85 | 10.00 | 2.78E-01 |
| cg19526908 | -29.76 | 13.49 | 2.74E-02 | -24.05 | 36.12 | 5.06E-01 | -14.49 | 182.77 | 9.37E-01 | -29.68  | 15.42 | 5.43E-02 | -40.21 | 44.97 | 3.71E-01 |
| cg23832822 | -20.94 | 9.49  | 2.74E-02 | -13.54 | 14.68 | 3.56E-01 | -58.83 | 24.14  | 1.48E-02 | -12.56  | 22.50 | 5.77E-01 | -15.85 | 19.01 | 4.04E-01 |
| cg27558693 | 17.41  | 7.89  | 2.74E-02 | 18.26  | 10.96 | 9.57E-02 | 13.80  | 20.52  | 5.01E-01 | 48.91   | 24.39 | 4.49E-02 | 3.41   | 16.50 | 8.36E-01 |
| cg24632873 | -13.37 | 6.06  | 2.74E-02 | -20.31 | 9.76  | 3.74E-02 | -16.83 | 14.70  | 2.52E-01 | -8.78   | 14.61 | 5.48E-01 | -4.27  | 11.62 | 7.13E-01 |
| cg08637514 | -20.24 | 9.18  | 2.74E-02 | -14.07 | 13.68 | 3.04E-01 | -4.41  | 18.62  | 8.13E-01 | -58.05  | 39.87 | 1.45E-01 | -38.42 | 18.20 | 3.48E-02 |
| cg23271318 | -34.56 | 15.66 | 2.74E-02 | -40.32 | 18.81 | 3.21E-02 | -24.77 | 61.49  | 6.87E-01 | -11.83  | 74.00 | 8.73E-01 | -22.67 | 35.31 | 5.21E-01 |
| cg23362687 | -20.44 | 9.27  | 2.74E-02 | -27.41 | 13.71 | 4.56E-02 | -23.24 | 34.47  | 5.00E-01 | -16.21  | 15.74 | 3.03E-01 | -5.04  | 26.24 | 8.48E-01 |

|            |        |       |          |        |       |          |         |        |          |        |       |          |         |       |          |
|------------|--------|-------|----------|--------|-------|----------|---------|--------|----------|--------|-------|----------|---------|-------|----------|
| cg03849279 | 13.87  | 6.29  | 2.74E-02 | 7.96   | 11.93 | 5.05E-01 | 16.51   | 18.53  | 3.73E-01 | 15.47  | 8.98  | 8.50E-02 | 18.63   | 18.39 | 3.11E-01 |
| cg05984290 | -36.82 | 16.69 | 2.74E-02 | -44.27 | 22.20 | 4.62E-02 | -88.45  | 45.73  | 5.31E-02 | -21.18 | 72.01 | 7.69E-01 | 4.48    | 33.51 | 8.94E-01 |
| cg19744122 | 59.69  | 27.06 | 2.74E-02 | 81.41  | 51.86 | 1.16E-01 | -372.30 | 234.37 | 1.12E-01 | 59.15  | 24.57 | 1.61E-02 | 67.50   | 65.26 | 3.01E-01 |
| cg20932768 | 37.10  | 16.82 | 2.74E-02 | 35.47  | 22.68 | 1.18E-01 | 38.24   | 72.00  | 5.95E-01 | 10.62  | 60.05 | 8.60E-01 | 46.26   | 29.86 | 1.21E-01 |
| cg07908868 | -12.84 | 5.82  | 2.74E-02 | -19.15 | 9.03  | 3.39E-02 | -8.24   | 12.84  | 5.21E-01 | -13.69 | 17.22 | 4.27E-01 | -6.13   | 11.32 | 5.88E-01 |
| cg07458500 | -15.11 | 6.85  | 2.74E-02 | -8.83  | 12.21 | 4.69E-01 | 9.72    | 25.37  | 7.02E-01 | -19.18 | 9.77  | 4.96E-02 | -29.89  | 19.72 | 1.30E-01 |
| cg14260530 | 13.47  | 6.11  | 2.74E-02 | 23.89  | 8.93  | 7.47E-03 | 9.97    | 12.34  | 4.19E-01 | -6.97  | 18.14 | 7.01E-01 | 5.43    | 13.74 | 6.93E-01 |
| cg05817443 | 13.50  | 6.12  | 2.74E-02 | 11.52  | 12.64 | 3.62E-01 | 13.74   | 14.27  | 3.36E-01 | 20.43  | 8.90  | 2.17E-02 | -12.65  | 18.52 | 4.94E-01 |
| cg24829430 | 20.62  | 9.35  | 2.74E-02 | 39.84  | 16.21 | 1.40E-02 | 15.62   | 20.30  | 4.42E-01 | 0.79   | 18.18 | 9.65E-01 | 20.18   | 21.38 | 3.45E-01 |
| cg09276451 | 11.18  | 5.07  | 2.74E-02 | 6.75   | 7.68  | 3.79E-01 | 18.31   | 9.98   | 6.65E-02 | 7.29   | 15.19 | 6.31E-01 | 13.83   | 11.46 | 2.27E-01 |
| cg05670472 | -6.18  | 2.80  | 2.74E-02 | -4.53  | 4.13  | 2.72E-01 | -7.91   | 5.87   | 1.78E-01 | -10.54 | 10.17 | 3.00E-01 | -6.35   | 5.78  | 2.72E-01 |
| cg23192824 | -15.35 | 6.96  | 2.74E-02 | -11.93 | 20.07 | 5.52E-01 | -77.24  | 40.97  | 5.94E-02 | -14.53 | 7.98  | 6.86E-02 | -7.01   | 23.26 | 7.63E-01 |
| cg12588208 | 15.81  | 7.17  | 2.74E-02 | 39.82  | 20.14 | 4.80E-02 | 30.36   | 21.81  | 1.64E-01 | 10.68  | 8.50  | 2.09E-01 | -2.00   | 30.69 | 9.48E-01 |
| cg02370877 | 16.42  | 7.44  | 2.74E-02 | 30.54  | 14.30 | 3.27E-02 | -4.51   | 22.30  | 8.40E-01 | 16.30  | 12.37 | 1.88E-01 | 10.75   | 14.71 | 4.65E-01 |
| cg01229943 | -25.07 | 11.36 | 2.74E-02 | -37.88 | 16.23 | 1.96E-02 | -16.40  | 27.34  | 5.49E-01 | -8.30  | 7.78  | 2.86E-01 | -54.03  | 22.24 | 1.51E-02 |
| cg14786757 | 20.32  | 9.21  | 2.74E-02 | 25.64  | 13.49 | 5.75E-02 | 26.62   | 19.04  | 1.62E-01 | 27.52  | 23.77 | 2.47E-01 | -13.26  | 23.79 | 5.77E-01 |
| cg26827394 | -31.83 | 14.43 | 2.74E-02 | -23.81 | 29.27 | 4.16E-01 | -29.43  | 115.98 | 8.00E-01 | -24.62 | 19.14 | 1.98E-01 | -66.90  | 34.66 | 5.36E-02 |
| cg17522953 | -10.98 | 4.98  | 2.74E-02 | -16.84 | 10.43 | 1.06E-01 | -15.04  | 14.79  | 3.09E-01 | -6.37  | 6.76  | 3.45E-01 | -17.13  | 14.67 | 2.43E-01 |
| cg10713839 | -7.37  | 3.34  | 2.74E-02 | -6.59  | 4.59  | 1.51E-01 | -5.79   | 8.05   | 4.72E-01 | -17.55 | 6.92  | 1.12E-02 | 0.09    | 6.94  | 9.90E-01 |
| cg02362020 | 13.29  | 6.03  | 2.74E-02 | 18.55  | 9.75  | 5.71E-02 | 3.08    | 12.44  | 8.04E-01 | 7.38   | 13.04 | 5.71E-01 | 23.07   | 14.66 | 1.16E-01 |
| cg04350202 | 7.06   | 3.20  | 2.74E-02 | 7.62   | 4.22  | 7.13E-02 | 15.29   | 9.16   | 9.50E-02 | 9.41   | 8.09  | 2.45E-01 | -4.43   | 8.33  | 5.95E-01 |
| cg05713486 | 11.20  | 5.08  | 2.74E-02 | 12.86  | 7.71  | 9.56E-02 | 6.80    | 9.93   | 4.93E-01 | -0.45  | 17.09 | 9.79E-01 | 17.90   | 10.89 | 1.00E-01 |
| cg11966583 | -51.62 | 23.41 | 2.74E-02 | -61.79 | 67.84 | 3.62E-01 | 243.67  | 275.73 | 3.77E-01 | -42.82 | 27.10 | 1.14E-01 | -110.15 | 65.47 | 9.25E-02 |
| cg13338454 | -7.59  | 3.44  | 2.74E-02 | -15.28 | 9.00  | 8.96E-02 | -0.51   | 11.71  | 9.65E-01 | -6.90  | 4.16  | 9.74E-02 | -7.10   | 11.89 | 5.50E-01 |
| cg24478696 | 41.89  | 19.00 | 2.74E-02 | 30.78  | 24.09 | 2.01E-01 | 94.04   | 88.35  | 2.87E-01 | 19.93  | 77.52 | 7.97E-01 | 63.26   | 36.41 | 8.23E-02 |
| cg21695485 | 19.71  | 8.94  | 2.74E-02 | 30.36  | 29.16 | 2.98E-01 | 61.29   | 82.07  | 4.55E-01 | 17.77  | 9.69  | 6.67E-02 | 23.35   | 42.98 | 5.87E-01 |
| cg06550986 | -8.67  | 3.93  | 2.74E-02 | -7.17  | 8.55  | 4.02E-01 | 0.42    | 14.61  | 9.77E-01 | -8.83  | 5.14  | 8.62E-02 | -15.40  | 10.84 | 1.55E-01 |
| cg10024501 | -21.54 | 9.77  | 2.74E-02 | -20.85 | 21.38 | 3.29E-01 | -6.72   | 43.93  | 8.78E-01 | -24.83 | 11.99 | 3.83E-02 | -4.64   | 35.10 | 8.95E-01 |
| cg03758467 | 9.14   | 4.15  | 2.74E-02 | 9.83   | 6.30  | 1.19E-01 | 13.68   | 9.69   | 1.58E-01 | 10.05  | 9.79  | 3.04E-01 | 2.85    | 9.15  | 7.55E-01 |
| cg07669223 | 18.06  | 8.19  | 2.74E-02 | 9.58   | 15.60 | 5.39E-01 | 12.37   | 14.32  | 3.88E-01 | 29.71  | 17.10 | 8.23E-02 | 27.20   | 20.02 | 1.74E-01 |
| cg26726529 | -19.96 | 9.05  | 2.74E-02 | -21.61 | 20.96 | 3.03E-01 | -12.50  | 47.78  | 7.94E-01 | -26.64 | 11.27 | 1.81E-02 | 12.84   | 24.87 | 6.06E-01 |
| cg01431908 | 24.26  | 11.00 | 2.74E-02 | 43.70  | 19.85 | 2.77E-02 | 13.71   | 34.38  | 6.90E-01 | 17.52  | 23.69 | 4.60E-01 | 15.08   | 17.98 | 4.02E-01 |
| cg24617741 | 11.92  | 5.40  | 2.74E-02 | 9.14   | 12.35 | 4.59E-01 | 3.33    | 17.74  | 8.51E-01 | 13.88  | 6.83  | 4.20E-02 | 13.00   | 18.12 | 4.73E-01 |
| cg05504729 | -8.91  | 4.04  | 2.75E-02 | -10.05 | 6.17  | 1.03E-01 | -13.36  | 8.62   | 1.21E-01 | 4.78   | 10.26 | 6.42E-01 | -12.23  | 9.12  | 1.80E-01 |
| cg14095316 | -16.31 | 7.40  | 2.75E-02 | -2.52  | 21.00 | 9.04E-01 | -47.84  | 44.90  | 2.87E-01 | -18.12 | 8.35  | 3.01E-02 | -7.57   | 29.24 | 7.96E-01 |

|            |        |       |          |        |       |          |        |        |          |         |       |          |        |       |          |
|------------|--------|-------|----------|--------|-------|----------|--------|--------|----------|---------|-------|----------|--------|-------|----------|
| cg18893025 | -13.56 | 6.15  | 2.75E-02 | -9.95  | 18.54 | 5.91E-01 | -11.23 | 30.01  | 7.08E-01 | -14.51  | 6.97  | 3.74E-02 | -10.04 | 23.29 | 6.66E-01 |
| cg00869668 | 6.73   | 3.05  | 2.75E-02 | 4.83   | 3.74  | 1.97E-01 | 13.95  | 6.54   | 3.28E-02 | 14.67   | 14.87 | 3.24E-01 | -1.87  | 11.15 | 8.67E-01 |
| cg10145246 | 15.70  | 7.12  | 2.75E-02 | 18.85  | 11.16 | 9.14E-02 | 22.19  | 19.58  | 2.57E-01 | 31.84   | 21.08 | 1.31E-01 | 4.22   | 12.10 | 7.27E-01 |
| cg20789700 | 5.74   | 2.61  | 2.75E-02 | 3.83   | 3.43  | 2.64E-01 | 10.98  | 6.12   | 7.30E-02 | 11.41   | 7.67  | 1.37E-01 | 1.84   | 7.30  | 8.01E-01 |
| cg17280106 | 6.41   | 2.91  | 2.75E-02 | 7.94   | 4.06  | 5.05E-02 | 4.20   | 7.06   | 5.53E-01 | 4.99    | 7.47  | 5.04E-01 | 5.26   | 7.16  | 4.62E-01 |
| cg23029851 | 14.37  | 6.52  | 2.75E-02 | 13.87  | 9.89  | 1.61E-01 | 3.31   | 16.97  | 8.45E-01 | 16.73   | 15.37 | 2.76E-01 | 20.32  | 13.34 | 1.28E-01 |
| cg04707332 | 10.81  | 4.90  | 2.75E-02 | 18.88  | 9.45  | 4.58E-02 | 1.28   | 12.65  | 9.19E-01 | 6.12    | 11.11 | 5.82E-01 | 11.26  | 7.89  | 1.54E-01 |
| cg20058043 | 22.15  | 10.05 | 2.75E-02 | 40.55  | 22.33 | 6.93E-02 | 6.58   | 32.40  | 8.39E-01 | 22.29   | 13.71 | 1.04E-01 | 8.09   | 24.82 | 7.44E-01 |
| cg18616862 | 32.46  | 14.72 | 2.75E-02 | 44.46  | 20.53 | 3.04E-02 | 16.80  | 39.28  | 6.69E-01 | 26.20   | 50.58 | 6.04E-01 | 19.27  | 28.84 | 5.04E-01 |
| cg22357679 | -12.52 | 5.68  | 2.75E-02 | -17.22 | 8.46  | 4.18E-02 | -4.80  | 14.01  | 7.32E-01 | -8.65   | 14.21 | 5.43E-01 | -11.48 | 11.95 | 3.37E-01 |
| cg15658577 | -67.24 | 30.50 | 2.75E-02 | -64.28 | 26.79 | 1.64E-02 | -64.06 | 84.71  | 4.50E-01 | -155.85 | 50.80 | 2.15E-03 | -2.30  | 41.38 | 9.56E-01 |
| cg20034100 | -10.17 | 4.61  | 2.75E-02 | -10.98 | 11.69 | 3.47E-01 | -1.75  | 22.41  | 9.38E-01 | -9.91   | 5.53  | 7.30E-02 | -14.02 | 14.17 | 3.23E-01 |
| cg24319902 | 15.06  | 6.83  | 2.75E-02 | 31.70  | 12.01 | 8.28E-03 | 7.33   | 14.43  | 6.12E-01 | 19.62   | 10.42 | 5.98E-02 | 1.15   | 10.70 | 9.14E-01 |
| cg17959962 | 10.77  | 4.89  | 2.75E-02 | 17.88  | 7.85  | 2.27E-02 | -6.34  | 17.06  | 7.10E-01 | 7.48    | 7.44  | 3.15E-01 | 11.46  | 15.51 | 4.60E-01 |
| cg15945999 | -8.90  | 4.04  | 2.75E-02 | -11.79 | 5.56  | 3.41E-02 | -6.88  | 8.77   | 4.33E-01 | -12.05  | 12.93 | 3.51E-01 | -0.35  | 9.98  | 9.72E-01 |
| cg07306190 | 9.67   | 4.39  | 2.75E-02 | 10.03  | 6.82  | 1.41E-01 | 12.36  | 10.72  | 2.49E-01 | 16.13   | 13.39 | 2.28E-01 | 5.52   | 7.87  | 4.83E-01 |
| cg01223793 | 21.68  | 9.84  | 2.75E-02 | 17.43  | 20.37 | 3.92E-01 | -4.92  | 53.38  | 9.27E-01 | 26.66   | 12.44 | 3.21E-02 | 10.32  | 30.01 | 7.31E-01 |
| cg25649188 | -11.84 | 5.37  | 2.75E-02 | -11.48 | 8.04  | 1.53E-01 | -18.34 | 11.29  | 1.04E-01 | -4.35   | 16.60 | 7.93E-01 | -9.49  | 11.40 | 4.05E-01 |
| cg12018809 | -9.50  | 4.31  | 2.75E-02 | -11.31 | 5.64  | 4.51E-02 | -6.84  | 10.84  | 5.28E-01 | 2.80    | 12.69 | 8.25E-01 | -14.98 | 11.39 | 1.89E-01 |
| cg15906675 | 16.04  | 7.28  | 2.75E-02 | 12.12  | 13.22 | 3.59E-01 | 3.12   | 19.51  | 8.73E-01 | 21.18   | 11.52 | 6.58E-02 | 21.89  | 18.28 | 2.31E-01 |
| cg17262025 | -34.07 | 15.46 | 2.75E-02 | -31.30 | 40.86 | 4.44E-01 | 147.63 | 192.59 | 4.43E-01 | -37.57  | 17.53 | 3.21E-02 | -18.26 | 57.30 | 7.50E-01 |
| cg26859042 | 14.40  | 6.53  | 2.75E-02 | 7.62   | 11.40 | 5.04E-01 | 11.51  | 16.43  | 4.84E-01 | 27.03   | 11.47 | 1.84E-02 | 6.88   | 15.05 | 6.48E-01 |
| cg14854112 | -10.54 | 4.78  | 2.75E-02 | -21.30 | 10.42 | 4.08E-02 | -4.79  | 12.71  | 7.06E-01 | -9.15   | 6.95  | 1.88E-01 | -5.98  | 11.43 | 6.01E-01 |
| cg07284273 | -9.03  | 4.10  | 2.75E-02 | -6.53  | 6.09  | 2.83E-01 | -11.71 | 8.27   | 1.57E-01 | 0.54    | 12.01 | 9.64E-01 | -17.54 | 9.50  | 6.49E-02 |
| cg11885098 | -11.27 | 5.11  | 2.75E-02 | -5.50  | 7.65  | 4.72E-01 | -14.10 | 14.40  | 3.27E-01 | -10.48  | 10.90 | 3.37E-01 | -22.88 | 11.25 | 4.20E-02 |
| cg12894449 | 13.88  | 6.30  | 2.75E-02 | 9.71   | 9.79  | 3.21E-01 | 29.38  | 15.05  | 5.09E-02 | 34.57   | 30.91 | 2.63E-01 | 8.87   | 10.36 | 3.92E-01 |
| cg12211557 | 16.63  | 7.55  | 2.75E-02 | 34.14  | 15.34 | 2.60E-02 | -8.83  | 22.33  | 6.92E-01 | 17.73   | 9.56  | 6.37E-02 | 0.29   | 22.51 | 9.90E-01 |
| cg16362480 | 10.03  | 4.55  | 2.75E-02 | 11.55  | 7.61  | 1.29E-01 | 6.35   | 9.89   | 5.21E-01 | 11.26   | 9.59  | 2.40E-01 | 9.83   | 10.05 | 3.28E-01 |
| cg09662823 | 16.24  | 7.37  | 2.75E-02 | 24.84  | 16.08 | 1.22E-01 | 2.52   | 19.15  | 8.95E-01 | 11.48   | 9.86  | 2.44E-01 | 50.62  | 25.46 | 4.68E-02 |
| cg14121971 | -23.19 | 10.53 | 2.76E-02 | -12.93 | 13.71 | 3.46E-01 | -19.19 | 26.82  | 4.74E-01 | -14.28  | 47.81 | 7.65E-01 | -57.28 | 23.07 | 1.30E-02 |
| cg13229972 | 8.14   | 3.69  | 2.76E-02 | 7.76   | 4.59  | 9.14E-02 | 17.94  | 9.93   | 7.08E-02 | 4.39    | 11.52 | 7.03E-01 | 1.74   | 10.96 | 8.74E-01 |
| cg24208206 | -29.83 | 13.54 | 2.76E-02 | -42.28 | 17.79 | 1.75E-02 | 19.37  | 65.45  | 7.67E-01 | 31.10   | 57.87 | 5.91E-01 | -24.35 | 23.80 | 3.06E-01 |
| cg12568669 | 6.26   | 2.84  | 2.76E-02 | 5.57   | 3.90  | 1.54E-01 | -2.08  | 6.48   | 7.49E-01 | 14.06   | 6.21  | 2.36E-02 | 7.72   | 6.21  | 2.14E-01 |
| cg02513485 | 18.07  | 8.20  | 2.76E-02 | 25.99  | 11.93 | 2.93E-02 | 22.92  | 20.71  | 2.69E-01 | 32.01   | 25.60 | 2.11E-01 | -4.08  | 15.85 | 7.97E-01 |
| cg00622010 | 16.15  | 7.33  | 2.76E-02 | 9.54   | 10.92 | 3.82E-01 | 30.32  | 15.10  | 4.47E-02 | -0.13   | 22.50 | 9.95E-01 | 22.75  | 16.08 | 1.57E-01 |



|            |        |       |          |         |       |          |        |        |          |        |       |          |        |       |          |
|------------|--------|-------|----------|---------|-------|----------|--------|--------|----------|--------|-------|----------|--------|-------|----------|
| cg22361291 | 23.71  | 10.76 | 2.76E-02 | 22.55   | 41.35 | 5.86E-01 | -24.72 | 160.65 | 8.78E-01 | 25.64  | 11.48 | 2.55E-02 | -5.24  | 49.01 | 9.15E-01 |
| cg25162473 | 17.77  | 8.07  | 2.76E-02 | 25.49   | 14.97 | 8.86E-02 | 0.30   | 23.55  | 9.90E-01 | 13.08  | 12.09 | 2.79E-01 | 30.63  | 21.01 | 1.45E-01 |
| cg27134645 | -14.48 | 6.57  | 2.76E-02 | -22.56  | 11.14 | 4.28E-02 | -1.38  | 18.73  | 9.41E-01 | -8.71  | 10.15 | 3.91E-01 | -25.49 | 19.81 | 1.98E-01 |
| cg09182435 | -13.29 | 6.03  | 2.76E-02 | -12.07  | 9.73  | 2.15E-01 | -15.56 | 13.74  | 2.57E-01 | -13.33 | 13.24 | 3.14E-01 | -13.38 | 12.98 | 3.03E-01 |
| cg08797423 | -14.00 | 6.36  | 2.76E-02 | -20.81  | 9.97  | 3.68E-02 | 3.30   | 15.99  | 8.37E-01 | -15.89 | 14.78 | 2.82E-01 | -12.47 | 12.71 | 3.26E-01 |
| cg01466011 | -7.31  | 3.32  | 2.76E-02 | -10.70  | 5.06  | 3.43E-02 | -2.39  | 6.77   | 7.24E-01 | -2.28  | 7.65  | 7.65E-01 | -12.05 | 8.84  | 1.73E-01 |
| cg12777730 | -12.38 | 5.62  | 2.76E-02 | -6.06   | 13.73 | 6.59E-01 | -2.87  | 23.35  | 9.02E-01 | -13.83 | 6.77  | 4.10E-02 | -19.54 | 19.26 | 3.10E-01 |
| cg25256661 | -15.90 | 7.22  | 2.76E-02 | -17.73  | 10.71 | 9.78E-02 | -4.82  | 23.07  | 8.35E-01 | 60.17  | 46.15 | 1.92E-01 | -20.43 | 9.69  | 3.49E-02 |
| cg08764037 | 10.50  | 4.77  | 2.76E-02 | 10.19   | 7.21  | 1.58E-01 | 17.71  | 11.57  | 1.26E-01 | -1.06  | 10.33 | 9.18E-01 | 18.14  | 11.23 | 1.06E-01 |
| cg17546247 | 10.22  | 4.64  | 2.76E-02 | 8.72    | 7.65  | 2.55E-01 | 18.56  | 11.77  | 1.15E-01 | 10.21  | 10.08 | 3.11E-01 | 7.42   | 9.02  | 4.10E-01 |
| cg01249187 | -8.54  | 3.88  | 2.76E-02 | -11.82  | 5.17  | 2.22E-02 | -1.66  | 9.70   | 8.64E-01 | -9.31  | 14.35 | 5.16E-01 | -4.63  | 8.57  | 5.89E-01 |
| cg03440944 | -11.29 | 5.12  | 2.76E-02 | -9.13   | 9.58  | 3.41E-01 | -19.81 | 11.76  | 9.22E-02 | -1.60  | 8.72  | 8.55E-01 | -24.41 | 12.11 | 4.39E-02 |
| cg19328764 | -49.65 | 22.54 | 2.76E-02 | -59.38  | 28.06 | 3.43E-02 | -3.61  | 94.84  | 9.70E-01 | -3.22  | 78.10 | 9.67E-01 | -50.52 | 48.59 | 2.98E-01 |
| cg24876404 | -7.61  | 3.45  | 2.76E-02 | -6.09   | 7.31  | 4.05E-01 | -20.05 | 9.99   | 4.48E-02 | -5.56  | 4.67  | 2.34E-01 | -7.34  | 10.34 | 4.78E-01 |
| cg19980771 | 4.91   | 2.23  | 2.76E-02 | 6.26    | 4.00  | 1.18E-01 | 9.26   | 6.48   | 1.53E-01 | 5.07   | 4.05  | 2.11E-01 | 1.25   | 4.30  | 7.72E-01 |
| cg17018896 | 16.75  | 7.61  | 2.76E-02 | 4.97    | 14.89 | 7.39E-01 | 34.44  | 16.74  | 3.97E-02 | 20.32  | 16.57 | 2.20E-01 | 12.63  | 13.40 | 3.46E-01 |
| cg03027244 | 13.09  | 5.94  | 2.76E-02 | 13.21   | 8.16  | 1.06E-01 | 15.00  | 21.15  | 4.78E-01 | 21.84  | 22.72 | 3.36E-01 | 10.57  | 10.46 | 3.12E-01 |
| cg00620449 | -27.94 | 12.68 | 2.76E-02 | -35.63  | 32.92 | 2.79E-01 | 51.28  | 98.90  | 6.04E-01 | -26.97 | 14.72 | 6.70E-02 | -37.43 | 41.63 | 3.69E-01 |
| cg22253838 | 23.89  | 10.84 | 2.76E-02 | 47.96   | 40.58 | 2.37E-01 | 7.85   | 59.07  | 8.94E-01 | 20.43  | 12.28 | 9.61E-02 | 37.12  | 32.02 | 2.46E-01 |
| cg14018153 | 8.67   | 3.94  | 2.76E-02 | 13.13   | 5.99  | 2.83E-02 | 8.04   | 10.56  | 4.46E-01 | 5.58   | 8.32  | 5.03E-01 | 3.08   | 8.69  | 7.23E-01 |
| cg00587628 | 20.22  | 9.18  | 2.76E-02 | 55.29   | 25.49 | 3.01E-02 | 0.73   | 36.60  | 9.84E-01 | 15.23  | 10.85 | 1.60E-01 | 22.89  | 30.29 | 4.50E-01 |
| cg12911476 | 51.00  | 23.16 | 2.76E-02 | 52.25   | 29.71 | 7.87E-02 | -32.70 | 108.82 | 7.64E-01 | 33.48  | 65.19 | 6.08E-01 | 74.72  | 49.24 | 1.29E-01 |
| cg15893127 | 19.72  | 8.95  | 2.76E-02 | 32.35   | 22.92 | 1.58E-01 | -45.49 | 89.85  | 6.13E-01 | 15.56  | 10.17 | 1.26E-01 | 50.33  | 35.59 | 1.57E-01 |
| cg11534596 | -10.68 | 4.85  | 2.76E-02 | -15.27  | 6.79  | 2.45E-02 | -2.79  | 10.69  | 7.94E-01 | -25.29 | 15.97 | 1.13E-01 | 0.07   | 11.05 | 9.95E-01 |
| cg08923379 | -42.77 | 19.42 | 2.76E-02 | -115.46 | 60.77 | 5.75E-02 | 19.19  | 231.91 | 9.34E-01 | -29.76 | 21.54 | 1.67E-01 | -88.48 | 69.37 | 2.02E-01 |
| cg05083033 | 11.97  | 5.43  | 2.76E-02 | 26.03   | 12.88 | 4.34E-02 | 50.77  | 38.18  | 1.84E-01 | 7.56   | 6.72  | 2.61E-01 | 9.24   | 14.12 | 5.13E-01 |
| cg16696727 | 15.03  | 6.82  | 2.76E-02 | 18.85   | 13.02 | 1.48E-01 | 7.76   | 16.51  | 6.38E-01 | 11.75  | 10.04 | 2.42E-01 | 33.50  | 22.44 | 1.35E-01 |
| cg10067723 | 8.59   | 3.90  | 2.76E-02 | 10.52   | 8.09  | 1.93E-01 | 17.91  | 7.94   | 2.41E-02 | 0.07   | 8.13  | 9.93E-01 | 6.11   | 7.16  | 3.94E-01 |
| cg00417421 | 21.10  | 9.58  | 2.76E-02 | 39.04   | 17.70 | 2.74E-02 | 6.25   | 25.35  | 8.05E-01 | 13.46  | 16.08 | 4.02E-01 | 19.08  | 20.96 | 3.63E-01 |
| cg00734436 | -13.75 | 6.25  | 2.76E-02 | -28.13  | 13.84 | 4.22E-02 | 4.01   | 19.90  | 8.40E-01 | -11.23 | 8.23  | 1.72E-01 | -16.06 | 17.91 | 3.70E-01 |
| cg01612140 | 8.51   | 3.86  | 2.76E-02 | 10.06   | 5.33  | 5.91E-02 | 13.05  | 8.72   | 1.35E-01 | 3.42   | 13.20 | 7.95E-01 | 1.93   | 8.79  | 8.27E-01 |
| cg19505767 | 11.78  | 5.35  | 2.76E-02 | -2.53   | 8.83  | 7.74E-01 | 12.77  | 11.91  | 2.83E-01 | 18.53  | 6.93  | 7.48E-03 | 18.37  | 11.68 | 1.16E-01 |
| cg06480736 | 21.56  | 9.79  | 2.76E-02 | 7.63    | 26.45 | 7.73E-01 | -49.98 | 72.76  | 4.92E-01 | 23.22  | 11.21 | 3.82E-02 | 45.44  | 34.35 | 1.86E-01 |
| cg21295467 | -22.43 | 10.19 | 2.76E-02 | -27.97  | 13.51 | 3.84E-02 | 1.96   | 44.80  | 9.65E-01 | 89.31  | 82.03 | 2.76E-01 | -21.98 | 16.87 | 1.93E-01 |
| cg26119740 | -19.83 | 9.01  | 2.76E-02 | -8.24   | 15.84 | 6.03E-01 | -45.79 | 20.17  | 2.32E-02 | -25.01 | 14.52 | 8.50E-02 | 0.84   | 22.17 | 9.70E-01 |

|            |        |       |          |        |       |          |        |        |          |        |       |          |        |       |          |
|------------|--------|-------|----------|--------|-------|----------|--------|--------|----------|--------|-------|----------|--------|-------|----------|
| cg06470727 | -10.77 | 4.89  | 2.77E-02 | -7.83  | 7.45  | 2.93E-01 | -15.18 | 11.37  | 1.82E-01 | -11.73 | 11.93 | 3.26E-01 | -12.11 | 10.52 | 2.50E-01 |
| cg06028247 | 8.81   | 4.00  | 2.77E-02 | 4.87   | 6.73  | 4.69E-01 | 10.24  | 10.71  | 3.39E-01 | 7.11   | 7.36  | 3.33E-01 | 16.85  | 8.71  | 5.31E-02 |
| cg24720038 | -15.47 | 7.03  | 2.77E-02 | -3.30  | 9.16  | 7.19E-01 | -23.59 | 15.78  | 1.35E-01 | -15.40 | 19.48 | 4.29E-01 | -30.84 | 12.82 | 1.62E-02 |
| cg19148201 | 7.19   | 3.27  | 2.77E-02 | 7.03   | 4.24  | 9.71E-02 | 5.06   | 6.96   | 4.67E-01 | 12.96  | 13.09 | 3.22E-01 | 8.85   | 9.29  | 3.40E-01 |
| cg12350196 | 7.20   | 3.27  | 2.77E-02 | 7.00   | 5.16  | 1.75E-01 | 7.32   | 5.65   | 1.95E-01 | 7.22   | 11.33 | 5.24E-01 | 7.43   | 7.71  | 3.35E-01 |
| cg25013443 | -8.39  | 3.81  | 2.77E-02 | -9.26  | 7.99  | 2.46E-01 | 19.25  | 19.96  | 3.35E-01 | -7.93  | 5.08  | 1.19E-01 | -14.53 | 9.14  | 1.12E-01 |
| cg25996061 | 15.53  | 7.05  | 2.77E-02 | 1.06   | 20.31 | 9.58E-01 | 6.25   | 23.43  | 7.90E-01 | 16.31  | 8.38  | 5.17E-02 | 40.50  | 24.73 | 1.01E-01 |
| cg10862399 | -9.17  | 4.17  | 2.77E-02 | -14.07 | 8.53  | 9.89E-02 | -16.49 | 13.38  | 2.18E-01 | -4.09  | 5.73  | 4.75E-01 | -15.16 | 11.32 | 1.81E-01 |
| cg19902173 | -13.72 | 6.23  | 2.77E-02 | -27.04 | 13.36 | 4.29E-02 | -35.72 | 17.55  | 4.17E-02 | -8.14  | 5.87  | 1.66E-01 | -3.85  | 12.55 | 7.59E-01 |
| cg15665646 | 28.02  | 12.73 | 2.77E-02 | 40.25  | 18.43 | 2.90E-02 | -20.34 | 29.16  | 4.85E-01 | 44.79  | 28.61 | 1.17E-01 | 30.78  | 21.46 | 1.52E-01 |
| cg11998932 | -6.19  | 2.81  | 2.77E-02 | -5.94  | 4.46  | 1.83E-01 | 0.28   | 5.47   | 9.60E-01 | -8.85  | 5.54  | 1.10E-01 | -16.45 | 8.56  | 5.48E-02 |
| cg07275207 | 17.99  | 8.17  | 2.77E-02 | 27.55  | 13.97 | 4.87E-02 | 3.87   | 17.28  | 8.23E-01 | 30.77  | 15.20 | 4.30E-02 | -3.94  | 19.82 | 8.43E-01 |
| cg00536939 | 7.78   | 3.53  | 2.77E-02 | 7.41   | 4.57  | 1.05E-01 | 16.11  | 8.16   | 4.82E-02 | 16.52  | 16.98 | 3.31E-01 | -2.17  | 8.48  | 7.98E-01 |
| cg12023589 | 11.72  | 5.32  | 2.77E-02 | 5.87   | 13.18 | 6.56E-01 | -36.78 | 35.63  | 3.02E-01 | 13.21  | 6.24  | 3.45E-02 | 22.70  | 18.00 | 2.07E-01 |
| cg00554993 | 7.98   | 3.62  | 2.77E-02 | 4.08   | 3.49  | 2.42E-01 | 13.00  | 7.15   | 6.89E-02 | 23.63  | 10.82 | 2.90E-02 | 4.62   | 8.07  | 5.67E-01 |
| cg08173915 | 5.32   | 2.41  | 2.77E-02 | 4.60   | 3.07  | 1.34E-01 | 11.34  | 6.11   | 6.35E-02 | 4.07   | 6.77  | 5.47E-01 | 1.82   | 7.74  | 8.14E-01 |
| cg06552160 | -11.89 | 5.40  | 2.77E-02 | -5.75  | 9.62  | 5.50E-01 | -16.92 | 12.44  | 1.74E-01 | -12.25 | 10.22 | 2.31E-01 | -15.95 | 11.58 | 1.68E-01 |
| cg02025157 | 46.21  | 20.99 | 2.77E-02 | 46.26  | 26.55 | 8.15E-02 | 23.72  | 69.08  | 7.31E-01 | 73.06  | 61.87 | 2.38E-01 | 39.99  | 51.31 | 4.36E-01 |
| cg22245615 | 19.93  | 9.05  | 2.77E-02 | 43.36  | 17.12 | 1.13E-02 | 6.82   | 19.10  | 7.21E-01 | 10.20  | 14.85 | 4.92E-01 | 19.94  | 25.70 | 4.38E-01 |
| cg09934782 | 16.32  | 7.41  | 2.77E-02 | 14.17  | 15.55 | 3.62E-01 | 39.21  | 31.10  | 2.07E-01 | 14.82  | 9.13  | 1.04E-01 | 19.35  | 31.09 | 5.34E-01 |
| cg07029862 | 28.64  | 13.01 | 2.77E-02 | 36.51  | 45.60 | 4.23E-01 | -44.55 | 156.06 | 7.75E-01 | 31.22  | 14.02 | 2.59E-02 | -18.69 | 58.40 | 7.49E-01 |
| cg20712820 | -10.87 | 4.94  | 2.77E-02 | -16.04 | 9.32  | 8.53E-02 | -25.73 | 17.95  | 1.52E-01 | -7.07  | 6.80  | 2.99E-01 | -5.98  | 14.53 | 6.81E-01 |
| cg01811559 | 23.87  | 10.85 | 2.77E-02 | 32.76  | 21.66 | 1.30E-01 | -24.10 | 49.42  | 6.26E-01 | 22.86  | 14.38 | 1.12E-01 | 28.85  | 29.84 | 3.34E-01 |
| cg05361459 | -7.71  | 3.50  | 2.77E-02 | -7.18  | 7.28  | 3.24E-01 | -15.42 | 11.92  | 1.96E-01 | -9.68  | 4.83  | 4.52E-02 | 2.31   | 8.82  | 7.94E-01 |
| cg21172497 | -7.87  | 3.57  | 2.77E-02 | -10.21 | 8.14  | 2.09E-01 | -13.51 | 15.66  | 3.88E-01 | -7.19  | 4.42  | 1.04E-01 | -4.83  | 11.30 | 6.69E-01 |
| cg13880779 | 16.03  | 7.28  | 2.77E-02 | 14.57  | 17.16 | 3.96E-01 | -17.18 | 74.84  | 8.18E-01 | 15.80  | 8.40  | 6.00E-02 | 29.04  | 30.22 | 3.37E-01 |
| cg17907057 | 11.77  | 5.35  | 2.77E-02 | 22.03  | 13.14 | 9.36E-02 | -2.91  | 10.69  | 7.86E-01 | 13.36  | 7.41  | 7.14E-02 | 24.49  | 17.90 | 1.71E-01 |
| cg11100465 | -12.39 | 5.63  | 2.77E-02 | -13.80 | 8.24  | 9.41E-02 | 5.37   | 14.22  | 7.06E-01 | -13.97 | 15.07 | 3.54E-01 | -20.44 | 11.57 | 7.72E-02 |
| cg19928195 | -14.43 | 6.56  | 2.78E-02 | -24.62 | 8.01  | 2.10E-03 | 0.97   | 13.33  | 9.42E-01 | 0.91   | 14.57 | 9.50E-01 | -20.15 | 10.04 | 4.47E-02 |
| cg10935720 | 27.75  | 12.61 | 2.78E-02 | 43.56  | 39.78 | 2.74E-01 | 91.47  | 195.32 | 6.40E-01 | 29.69  | 13.94 | 3.32E-02 | -16.93 | 45.47 | 7.10E-01 |
| cg21341821 | 5.44   | 2.47  | 2.78E-02 | 6.68   | 3.35  | 4.63E-02 | 7.70   | 4.80   | 1.08E-01 | -1.79  | 11.56 | 8.77E-01 | -1.03  | 6.46  | 8.74E-01 |
| cg09554951 | 9.43   | 4.29  | 2.78E-02 | 10.27  | 8.99  | 2.53E-01 | 6.75   | 9.55   | 4.80E-01 | 11.77  | 8.57  | 1.70E-01 | 8.70   | 7.56  | 2.50E-01 |
| cg06070002 | -8.14  | 3.70  | 2.78E-02 | -3.28  | 7.04  | 6.41E-01 | -6.63  | 9.67   | 4.93E-01 | -11.66 | 5.42  | 3.14E-02 | -7.42  | 11.09 | 5.03E-01 |
| cg26159077 | -29.40 | 13.36 | 2.78E-02 | -91.50 | 44.37 | 3.92E-02 | -16.54 | 191.26 | 9.31E-01 | -21.33 | 14.88 | 1.52E-01 | -38.92 | 42.58 | 3.61E-01 |
| cg10683503 | 31.90  | 14.50 | 2.78E-02 | 37.04  | 20.75 | 7.43E-02 | 30.04  | 41.77  | 4.72E-01 | 9.30   | 15.34 | 5.44E-01 | 78.26  | 30.57 | 1.05E-02 |

|            |        |       |          |        |       |          |        |        |          |        |       |          |        |       |          |
|------------|--------|-------|----------|--------|-------|----------|--------|--------|----------|--------|-------|----------|--------|-------|----------|
| cg07531056 | -21.00 | 9.54  | 2.78E-02 | -15.03 | 15.44 | 3.30E-01 | -11.45 | 22.42  | 6.09E-01 | -37.70 | 22.66 | 9.61E-02 | -25.08 | 18.76 | 1.81E-01 |
| cg12832726 | 9.49   | 4.31  | 2.78E-02 | 9.74   | 6.30  | 1.23E-01 | 19.56  | 8.94   | 2.88E-02 | 4.98   | 13.58 | 7.14E-01 | -0.57  | 9.66  | 9.53E-01 |
| cg04857420 | 13.95  | 6.34  | 2.78E-02 | 14.81  | 12.90 | 2.51E-01 | 4.36   | 24.06  | 8.56E-01 | 16.10  | 9.58  | 9.28E-02 | 12.01  | 12.64 | 3.42E-01 |
| cg19483465 | -13.62 | 6.19  | 2.78E-02 | -12.84 | 8.98  | 1.53E-01 | 15.89  | 24.63  | 5.19E-01 | -32.71 | 15.08 | 3.01E-02 | -10.81 | 10.40 | 2.98E-01 |
| cg16489468 | -11.36 | 5.16  | 2.78E-02 | 5.76   | 13.82 | 6.77E-01 | 2.75   | 20.24  | 8.92E-01 | -14.64 | 6.03  | 1.51E-02 | -26.03 | 20.83 | 2.12E-01 |
| cg18456933 | 6.37   | 2.89  | 2.78E-02 | 7.37   | 5.03  | 1.42E-01 | 8.82   | 7.40   | 2.33E-01 | 6.32   | 4.55  | 1.64E-01 | 0.11   | 8.72  | 9.90E-01 |
| cg14477581 | -9.28  | 4.22  | 2.78E-02 | -12.57 | 7.58  | 9.73E-02 | -18.23 | 14.11  | 1.96E-01 | -6.86  | 6.20  | 2.69E-01 | -4.27  | 11.28 | 7.05E-01 |
| cg11801629 | -32.86 | 14.93 | 2.78E-02 | -48.90 | 46.02 | 2.88E-01 | 76.33  | 221.99 | 7.31E-01 | -28.76 | 16.57 | 8.26E-02 | -60.44 | 53.61 | 2.60E-01 |
| cg16643558 | 20.61  | 9.37  | 2.78E-02 | 17.50  | 16.77 | 2.97E-01 | 9.87   | 17.52  | 5.73E-01 | 27.60  | 19.24 | 1.51E-01 | 35.09  | 23.07 | 1.28E-01 |
| cg13701159 | 32.39  | 14.72 | 2.78E-02 | 40.41  | 18.78 | 3.14E-02 | 25.86  | 47.94  | 5.90E-01 | 42.72  | 62.15 | 4.92E-01 | 11.56  | 30.37 | 7.04E-01 |
| cg23934071 | -13.72 | 6.24  | 2.78E-02 | -13.60 | 8.84  | 1.24E-01 | -27.08 | 14.18  | 5.62E-02 | -6.02  | 19.74 | 7.61E-01 | -5.35  | 13.63 | 6.95E-01 |
| cg17416748 | 35.79  | 16.26 | 2.78E-02 | 18.83  | 22.77 | 4.08E-01 | 37.21  | 54.95  | 4.98E-01 | 63.36  | 42.42 | 1.35E-01 | 53.35  | 32.21 | 9.77E-02 |
| cg16366843 | 15.34  | 6.97  | 2.78E-02 | 41.10  | 29.43 | 1.63E-01 | 41.81  | 47.89  | 3.83E-01 | 12.98  | 8.07  | 1.08E-01 | 13.92  | 16.54 | 4.00E-01 |
| cg16290335 | 27.44  | 12.47 | 2.78E-02 | 13.41  | 18.11 | 4.59E-01 | 71.65  | 41.07  | 8.11E-02 | 54.77  | 29.24 | 6.10E-02 | 17.91  | 24.84 | 4.71E-01 |
| cg23685759 | 20.87  | 9.49  | 2.78E-02 | -24.38 | 29.66 | 4.11E-01 | 78.73  | 79.59  | 3.23E-01 | 25.22  | 10.34 | 1.47E-02 | 24.40  | 26.86 | 3.64E-01 |
| cg17795540 | 20.28  | 9.22  | 2.78E-02 | 5.27   | 17.25 | 7.60E-01 | 10.02  | 18.64  | 5.91E-01 | 37.41  | 17.16 | 2.93E-02 | 30.45  | 21.62 | 1.59E-01 |
| cg19165216 | -11.55 | 5.25  | 2.78E-02 | -5.53  | 8.42  | 5.12E-01 | -15.92 | 12.81  | 2.14E-01 | -8.86  | 14.07 | 5.29E-01 | -18.05 | 9.51  | 5.78E-02 |
| cg23803223 | -8.46  | 3.85  | 2.78E-02 | -11.18 | 6.39  | 8.01E-02 | -4.26  | 7.56   | 5.73E-01 | 0.26   | 8.98  | 9.77E-01 | -17.17 | 8.70  | 4.84E-02 |
| cg16570129 | -12.73 | 5.79  | 2.78E-02 | -18.46 | 8.22  | 2.48E-02 | -18.64 | 16.04  | 2.45E-01 | -7.52  | 13.26 | 5.71E-01 | 1.49   | 13.51 | 9.12E-01 |
| cg16706427 | 30.70  | 13.95 | 2.78E-02 | 33.40  | 32.67 | 3.07E-01 | -33.75 | 129.42 | 7.94E-01 | 34.62  | 16.27 | 3.34E-02 | -6.63  | 52.60 | 9.00E-01 |
| cg02536065 | 10.01  | 4.55  | 2.78E-02 | 10.06  | 8.13  | 2.16E-01 | 23.37  | 10.43  | 2.50E-02 | 9.17   | 5.38  | 8.85E-02 | -9.72  | 14.32 | 4.98E-01 |
| cg07566080 | 15.32  | 6.96  | 2.78E-02 | 45.76  | 20.16 | 2.32E-02 | 15.77  | 27.99  | 5.73E-01 | 12.76  | 8.59  | 1.37E-01 | 3.04   | 17.35 | 8.61E-01 |
| cg27297576 | 12.72  | 5.78  | 2.78E-02 | 25.71  | 11.33 | 2.32E-02 | 11.42  | 29.00  | 6.94E-01 | 8.02   | 7.62  | 2.92E-01 | 7.65   | 16.40 | 6.41E-01 |
| cg25284762 | 17.53  | 7.97  | 2.78E-02 | 4.29   | 13.91 | 7.58E-01 | 19.81  | 15.06  | 1.89E-01 | 32.35  | 15.77 | 4.03E-02 | 16.98  | 21.56 | 4.31E-01 |
| cg17279458 | 5.39   | 2.45  | 2.78E-02 | 2.93   | 3.96  | 4.59E-01 | 5.81   | 6.03   | 3.36E-01 | 10.72  | 4.33  | 1.33E-02 | -0.95  | 6.75  | 8.88E-01 |
| cg04932082 | 6.57   | 2.99  | 2.78E-02 | 6.81   | 3.86  | 7.78E-02 | 16.23  | 8.89   | 6.80E-02 | 2.88   | 8.16  | 7.24E-01 | 1.80   | 7.57  | 8.12E-01 |
| cg20269160 | -10.11 | 4.60  | 2.78E-02 | -27.07 | 12.10 | 2.53E-02 | -17.15 | 18.03  | 3.41E-01 | -6.23  | 5.40  | 2.48E-01 | -8.77  | 18.06 | 6.27E-01 |
| cg01272627 | 20.47  | 9.31  | 2.78E-02 | 30.97  | 20.77 | 1.36E-01 | 25.76  | 20.81  | 2.16E-01 | 17.57  | 13.37 | 1.89E-01 | 5.13   | 27.47 | 8.52E-01 |
| cg15000071 | -13.34 | 6.07  | 2.78E-02 | -23.06 | 9.09  | 1.12E-02 | 0.53   | 17.52  | 9.76E-01 | -5.44  | 14.56 | 7.09E-01 | -8.41  | 11.87 | 4.79E-01 |
| cg24025721 | 6.47   | 2.94  | 2.78E-02 | 7.75   | 3.64  | 3.32E-02 | 10.62  | 7.89   | 1.78E-01 | -1.02  | 9.84  | 9.18E-01 | 0.14   | 8.60  | 9.87E-01 |
| cg09881253 | 48.00  | 21.83 | 2.79E-02 | 48.99  | 30.09 | 1.03E-01 | 153.71 | 104.23 | 1.40E-01 | -23.91 | 64.37 | 7.10E-01 | 57.88  | 38.89 | 1.37E-01 |
| cg18646186 | 18.67  | 8.49  | 2.79E-02 | 43.65  | 19.82 | 2.76E-02 | 2.69   | 22.84  | 9.06E-01 | 11.93  | 10.06 | 2.36E-01 | 42.12  | 29.85 | 1.58E-01 |
| cg23917868 | 11.53  | 5.24  | 2.79E-02 | 9.41   | 7.44  | 2.06E-01 | 24.80  | 12.18  | 4.18E-02 | 17.98  | 12.93 | 1.65E-01 | -4.44  | 13.35 | 7.39E-01 |
| cg22574586 | 16.12  | 7.33  | 2.79E-02 | 17.89  | 12.41 | 1.49E-01 | 5.14   | 14.71  | 7.27E-01 | 10.21  | 7.48  | 1.72E-01 | 49.89  | 18.97 | 8.55E-03 |
| cg06386482 | 2.72   | 1.24  | 2.79E-02 | 2.41   | 1.72  | 1.60E-01 | 0.38   | 2.80   | 8.93E-01 | 5.47   | 3.44  | 1.13E-01 | 4.32   | 3.08  | 1.61E-01 |

|            |        |       |          |         |       |          |         |        |          |        |       |          |        |       |          |
|------------|--------|-------|----------|---------|-------|----------|---------|--------|----------|--------|-------|----------|--------|-------|----------|
| cg08759041 | -4.67  | 2.13  | 2.79E-02 | -7.15   | 3.17  | 2.41E-02 | -7.41   | 4.96   | 1.35E-01 | 1.18   | 7.41  | 8.73E-01 | -0.69  | 3.98  | 8.63E-01 |
| cg13069237 | 17.10  | 7.78  | 2.79E-02 | 28.49   | 16.76 | 8.91E-02 | 21.21   | 19.96  | 2.88E-01 | 6.70   | 11.10 | 5.46E-01 | 31.42  | 20.64 | 1.28E-01 |
| cg16545773 | 18.39  | 8.36  | 2.79E-02 | 41.59   | 21.99 | 5.86E-02 | 10.08   | 21.78  | 6.44E-01 | 11.64  | 10.60 | 2.72E-01 | 42.61  | 28.61 | 1.36E-01 |
| cg10757679 | 18.76  | 8.53  | 2.79E-02 | 23.05   | 14.95 | 1.23E-01 | 21.51   | 17.95  | 2.31E-01 | 4.80   | 15.35 | 7.55E-01 | 35.20  | 22.83 | 1.23E-01 |
| cg05359130 | 17.16  | 7.81  | 2.79E-02 | 24.42   | 10.41 | 1.90E-02 | 18.51   | 29.87  | 5.35E-01 | -25.94 | 35.70 | 4.67E-01 | 10.61  | 13.77 | 4.41E-01 |
| cg26230516 | 19.09  | 8.68  | 2.79E-02 | 7.62    | 27.47 | 7.81E-01 | 25.04   | 52.62  | 6.34E-01 | 18.02  | 9.76  | 6.49E-02 | 41.33  | 30.28 | 1.72E-01 |
| cg16705578 | 21.38  | 9.72  | 2.79E-02 | 2.35    | 38.21 | 9.51E-01 | 114.79  | 136.50 | 4.00E-01 | 25.47  | 10.37 | 1.40E-02 | -34.23 | 43.04 | 4.26E-01 |
| cg24476449 | -9.01  | 4.10  | 2.79E-02 | -14.44  | 5.61  | 1.01E-02 | -1.58   | 9.72   | 8.71E-01 | -13.52 | 14.15 | 3.39E-01 | 0.50   | 9.05  | 9.56E-01 |
| cg01344171 | 9.91   | 4.51  | 2.79E-02 | 9.56    | 6.22  | 1.24E-01 | 10.90   | 10.04  | 2.77E-01 | 12.36  | 13.20 | 3.49E-01 | 7.99   | 11.38 | 4.83E-01 |
| cg23189044 | 9.53   | 4.34  | 2.79E-02 | 8.34    | 6.35  | 1.90E-01 | 19.79   | 9.79   | 4.33E-02 | 10.64  | 12.17 | 3.82E-01 | 1.99   | 9.43  | 8.33E-01 |
| cg06867755 | 5.47   | 2.49  | 2.79E-02 | 4.64    | 3.27  | 1.56E-01 | 14.65   | 7.17   | 4.10E-02 | 7.29   | 6.61  | 2.70E-01 | -0.09  | 6.25  | 9.89E-01 |
| cg02089348 | -16.03 | 7.29  | 2.79E-02 | -16.64  | 10.25 | 1.05E-01 | 1.20    | 14.98  | 9.36E-01 | -43.13 | 19.28 | 2.53E-02 | -15.18 | 14.70 | 3.02E-01 |
| cg07613391 | -6.94  | 3.15  | 2.79E-02 | -5.34   | 4.26  | 2.10E-01 | -17.26  | 8.02   | 3.14E-02 | 2.92   | 10.69 | 7.85E-01 | -7.58  | 6.88  | 2.70E-01 |
| cg01437135 | -12.32 | 5.60  | 2.79E-02 | -21.80  | 9.77  | 2.57E-02 | -6.27   | 13.57  | 6.44E-01 | -2.45  | 10.32 | 8.12E-01 | -16.32 | 12.35 | 1.86E-01 |
| cg13715798 | 13.18  | 6.00  | 2.79E-02 | 9.48    | 9.20  | 3.03E-01 | 3.57    | 13.05  | 7.85E-01 | 21.70  | 14.76 | 1.41E-01 | 24.25  | 13.45 | 7.15E-02 |
| cg15010903 | 5.04   | 2.29  | 2.79E-02 | 3.10    | 2.94  | 2.91E-01 | 11.67   | 5.28   | 2.71E-02 | 7.53   | 4.64  | 1.05E-01 | -1.59  | 6.58  | 8.10E-01 |
| cg00638075 | 38.05  | 17.31 | 2.79E-02 | 55.34   | 42.72 | 1.95E-01 | -158.67 | 173.26 | 3.60E-01 | 34.27  | 19.95 | 8.58E-02 | 64.76  | 63.81 | 3.10E-01 |
| cg14786024 | 18.75  | 8.53  | 2.79E-02 | 35.44   | 31.90 | 2.67E-01 | 29.38   | 34.77  | 3.98E-01 | 19.96  | 9.89  | 4.35E-02 | -3.25  | 24.21 | 8.93E-01 |
| cg01805215 | 12.08  | 5.49  | 2.79E-02 | 12.32   | 8.55  | 1.50E-01 | 23.04   | 12.92  | 7.45E-02 | 4.67   | 17.60 | 7.91E-01 | 7.67   | 9.89  | 4.38E-01 |
| cg08439890 | -9.65  | 4.39  | 2.79E-02 | -16.78  | 9.02  | 6.27E-02 | -4.67   | 12.12  | 7.00E-01 | -6.14  | 6.06  | 3.11E-01 | -17.25 | 13.45 | 2.00E-01 |
| cg26920627 | -12.00 | 5.46  | 2.79E-02 | -21.64  | 10.83 | 4.58E-02 | -13.08  | 14.02  | 3.51E-01 | -8.26  | 8.17  | 3.11E-01 | -5.63  | 14.19 | 6.92E-01 |
| cg13539030 | -42.04 | 19.12 | 2.79E-02 | -62.43  | 52.95 | 2.38E-01 | 17.31   | 217.63 | 9.37E-01 | -40.81 | 21.90 | 6.24E-02 | -29.33 | 60.55 | 6.28E-01 |
| cg04217140 | -19.10 | 8.69  | 2.79E-02 | -13.52  | 23.47 | 5.64E-01 | 108.96  | 88.18  | 2.17E-01 | -19.99 | 9.91  | 4.37E-02 | -34.70 | 29.84 | 2.45E-01 |
| cg24968692 | 13.09  | 5.95  | 2.79E-02 | 10.51   | 10.40 | 3.13E-01 | -2.41   | 15.11  | 8.73E-01 | 15.27  | 9.13  | 9.46E-02 | 38.18  | 19.56 | 5.10E-02 |
| cg17550566 | 8.83   | 4.02  | 2.79E-02 | 6.80    | 5.02  | 1.75E-01 | 23.22   | 9.14   | 1.11E-02 | 7.18   | 10.36 | 4.89E-01 | 1.38   | 9.23  | 8.81E-01 |
| cg14265868 | 41.58  | 18.92 | 2.79E-02 | 55.04   | 23.25 | 1.79E-02 | -8.80   | 96.30  | 9.27E-01 | 47.40  | 56.79 | 4.04E-01 | 1.27   | 43.55 | 9.77E-01 |
| cg06097077 | -9.60  | 4.37  | 2.79E-02 | -4.60   | 8.38  | 5.83E-01 | -10.13  | 19.85  | 6.10E-01 | -10.75 | 5.93  | 7.00E-02 | -14.79 | 11.78 | 2.09E-01 |
| cg26909564 | 13.36  | 6.08  | 2.79E-02 | -9.26   | 17.33 | 5.93E-01 | 14.02   | 26.15  | 5.92E-01 | 14.88  | 6.98  | 3.30E-02 | 38.40  | 24.07 | 1.11E-01 |
| cg11987068 | -15.69 | 7.14  | 2.79E-02 | -20.34  | 12.10 | 9.26E-02 | -4.97   | 17.05  | 7.71E-01 | -15.34 | 15.00 | 3.06E-01 | -17.05 | 14.29 | 2.33E-01 |
| cg23343066 | -12.83 | 5.84  | 2.79E-02 | -11.34  | 9.88  | 2.51E-01 | -20.13  | 12.76  | 1.15E-01 | -6.63  | 15.48 | 6.68E-01 | -12.40 | 10.66 | 2.45E-01 |
| cg17356964 | -35.57 | 16.18 | 2.80E-02 | -47.81  | 20.82 | 2.17E-02 | -54.87  | 69.24  | 4.28E-01 | -29.11 | 49.01 | 5.53E-01 | -2.24  | 33.58 | 9.47E-01 |
| cg07794981 | -8.10  | 3.69  | 2.80E-02 | -4.46   | 8.21  | 5.87E-01 | 6.73    | 14.15  | 6.34E-01 | -8.65  | 4.79  | 7.09E-02 | -18.31 | 9.90  | 6.45E-02 |
| cg05053818 | 13.27  | 6.04  | 2.80E-02 | 19.55   | 9.95  | 4.93E-02 | 1.79    | 15.66  | 9.09E-01 | 12.84  | 10.61 | 2.26E-01 | 10.31  | 15.14 | 4.96E-01 |
| cg17331566 | 16.65  | 7.58  | 2.80E-02 | 6.86    | 11.32 | 5.44E-01 | 24.66   | 14.70  | 9.35E-02 | 15.24  | 21.62 | 4.81E-01 | 31.47  | 18.71 | 9.25E-02 |
| cg26057380 | -62.17 | 28.29 | 2.80E-02 | -133.94 | 55.94 | 1.67E-02 | -36.30  | 265.21 | 8.91E-01 | -35.98 | 36.33 | 3.22E-01 | -44.93 | 79.42 | 5.72E-01 |

|            |        |       |          |        |       |          |         |        |          |        |       |          |        |       |          |
|------------|--------|-------|----------|--------|-------|----------|---------|--------|----------|--------|-------|----------|--------|-------|----------|
| cg27457191 | -8.68  | 3.95  | 2.80E-02 | -10.85 | 5.74  | 5.88E-02 | -5.01   | 9.68   | 6.05E-01 | -7.95  | 9.64  | 4.10E-01 | -7.17  | 9.01  | 4.26E-01 |
| cg19392831 | 16.42  | 7.47  | 2.80E-02 | 18.01  | 11.77 | 1.26E-01 | 12.09   | 19.57  | 5.37E-01 | 31.74  | 16.08 | 4.84E-02 | 2.32   | 15.42 | 8.81E-01 |
| cg06298740 | 5.99   | 2.72  | 2.80E-02 | 5.54   | 3.54  | 1.17E-01 | 14.08   | 7.75   | 6.93E-02 | 4.06   | 7.51  | 5.89E-01 | 2.82   | 6.99  | 6.87E-01 |
| cg26578983 | 6.67   | 3.03  | 2.80E-02 | 7.05   | 4.15  | 8.94E-02 | 14.84   | 6.85   | 3.04E-02 | -1.43  | 10.19 | 8.89E-01 | 0.67   | 7.11  | 9.25E-01 |
| cg16080125 | 8.73   | 3.97  | 2.80E-02 | 9.60   | 5.43  | 7.72E-02 | 12.76   | 8.15   | 1.17E-01 | 18.32  | 15.22 | 2.29E-01 | -4.36  | 9.98  | 6.62E-01 |
| cg23878577 | -13.54 | 6.16  | 2.80E-02 | -1.60  | 13.49 | 9.05E-01 | -10.03  | 18.00  | 5.77E-01 | -20.55 | 8.11  | 1.12E-02 | -1.64  | 19.85 | 9.34E-01 |
| cg22578843 | 25.40  | 11.56 | 2.80E-02 | 52.46  | 49.34 | 2.88E-01 | -53.50  | 165.44 | 7.46E-01 | 20.78  | 12.57 | 9.83E-02 | 54.96  | 37.52 | 1.43E-01 |
| cg27166993 | 20.81  | 9.47  | 2.80E-02 | 58.53  | 23.36 | 1.22E-02 | 38.65   | 46.23  | 4.03E-01 | 13.41  | 9.65  | 1.65E-01 | 12.27  | 17.69 | 4.88E-01 |
| cg08450280 | 33.06  | 15.04 | 2.80E-02 | 32.42  | 19.11 | 8.98E-02 | 8.26    | 45.54  | 8.56E-01 | 113.36 | 56.51 | 4.48E-02 | 20.13  | 33.62 | 5.49E-01 |
| cg08212913 | 19.07  | 8.68  | 2.80E-02 | 23.98  | 12.85 | 6.20E-02 | 18.11   | 16.51  | 2.73E-01 | 15.91  | 24.00 | 5.07E-01 | 7.64   | 23.50 | 7.45E-01 |
| cg03317463 | -37.35 | 16.99 | 2.80E-02 | -39.02 | 22.25 | 7.95E-02 | -42.39  | 50.85  | 4.05E-01 | -51.50 | 62.56 | 4.10E-01 | -26.17 | 35.34 | 4.59E-01 |
| cg21151963 | -10.57 | 4.81  | 2.80E-02 | -34.54 | 15.84 | 2.92E-02 | -9.83   | 27.83  | 7.24E-01 | -9.49  | 5.54  | 8.69E-02 | 0.40   | 13.57 | 9.77E-01 |
| cg02369052 | -10.72 | 4.88  | 2.80E-02 | -21.05 | 8.79  | 1.66E-02 | -10.33  | 11.59  | 3.73E-01 | -5.62  | 8.64  | 5.15E-01 | -3.12  | 11.03 | 7.78E-01 |
| cg01293740 | -9.44  | 4.30  | 2.80E-02 | -5.54  | 6.14  | 3.67E-01 | -21.45  | 11.01  | 5.13E-02 | -16.47 | 11.35 | 1.47E-01 | -5.12  | 9.27  | 5.80E-01 |
| cg10446356 | 22.12  | 10.07 | 2.80E-02 | 38.95  | 19.01 | 4.05E-02 | 47.97   | 54.17  | 3.76E-01 | 15.07  | 13.66 | 2.70E-01 | 9.57   | 26.70 | 7.20E-01 |
| cg01479911 | 29.31  | 13.34 | 2.80E-02 | 33.07  | 38.61 | 3.92E-01 | 59.95   | 153.04 | 6.95E-01 | 30.97  | 14.84 | 3.69E-02 | -1.84  | 52.31 | 9.72E-01 |
| cg22127848 | 6.07   | 2.76  | 2.80E-02 | 7.00   | 4.44  | 1.15E-01 | 5.38    | 7.55   | 4.77E-01 | 7.54   | 4.49  | 9.29E-02 | -2.22  | 8.77  | 8.00E-01 |
| cg00371568 | -32.97 | 15.00 | 2.80E-02 | -29.79 | 17.65 | 9.14E-02 | -182.25 | 97.56  | 6.18E-02 | 12.15  | 72.75 | 8.67E-01 | -36.19 | 32.64 | 2.68E-01 |
| cg20729460 | -9.93  | 4.52  | 2.80E-02 | -11.94 | 7.88  | 1.30E-01 | -8.83   | 13.83  | 5.23E-01 | -8.22  | 6.95  | 2.37E-01 | -11.22 | 12.04 | 3.51E-01 |
| cg19357849 | -12.45 | 5.67  | 2.80E-02 | -14.65 | 8.03  | 6.83E-02 | -22.03  | 12.15  | 6.99E-02 | 14.39  | 25.17 | 5.68E-01 | -4.71  | 11.70 | 6.88E-01 |
| cg00311133 | 20.98  | 9.55  | 2.80E-02 | 8.40   | 19.19 | 6.62E-01 | 2.57    | 18.85  | 8.91E-01 | 35.87  | 15.54 | 2.10E-02 | 39.75  | 27.78 | 1.52E-01 |
| cg02814805 | 8.33   | 3.79  | 2.80E-02 | 10.83  | 5.70  | 5.75E-02 | -2.13   | 10.33  | 8.37E-01 | 2.27   | 8.93  | 7.99E-01 | 14.10  | 7.70  | 6.71E-02 |
| cg17352975 | 25.14  | 11.44 | 2.80E-02 | 24.91  | 16.03 | 1.20E-01 | 24.47   | 30.02  | 4.15E-01 | 11.78  | 31.74 | 7.11E-01 | 34.21  | 24.68 | 1.66E-01 |
| cg08469215 | 7.15   | 3.25  | 2.80E-02 | 8.68   | 4.02  | 3.09E-02 | 6.92    | 8.11   | 3.93E-01 | 21.44  | 14.23 | 1.32E-01 | -4.49  | 8.52  | 5.99E-01 |
| cg13872688 | 16.69  | 7.60  | 2.80E-02 | 46.58  | 27.54 | 9.08E-02 | -107.15 | 103.28 | 3.00E-01 | 13.84  | 8.25  | 9.36E-02 | 28.32  | 28.61 | 3.22E-01 |
| cg08170583 | -12.88 | 5.86  | 2.80E-02 | -26.39 | 10.04 | 8.57E-03 | 2.49    | 13.81  | 8.57E-01 | -7.59  | 9.14  | 4.06E-01 | -14.92 | 12.45 | 2.31E-01 |
| cg05651688 | -20.70 | 9.42  | 2.80E-02 | -15.51 | 27.91 | 5.79E-01 | -226.28 | 152.64 | 1.38E-01 | -20.53 | 10.39 | 4.82E-02 | -19.82 | 38.32 | 6.05E-01 |
| cg23109129 | 24.35  | 11.08 | 2.80E-02 | 29.89  | 13.39 | 2.56E-02 | -58.58  | 57.27  | 3.06E-01 | 21.32  | 58.93 | 7.17E-01 | 21.95  | 22.52 | 3.30E-01 |
| cg27250841 | 14.43  | 6.57  | 2.80E-02 | 14.26  | 7.35  | 5.25E-02 | 47.31   | 30.42  | 1.20E-01 | -43.49 | 57.82 | 4.52E-01 | 9.86   | 17.38 | 5.70E-01 |
| cg05146544 | 9.35   | 4.26  | 2.80E-02 | 16.56  | 7.75  | 3.27E-02 | 1.73    | 8.92   | 8.46E-01 | 14.81  | 8.14  | 6.88E-02 | 0.07   | 9.35  | 9.94E-01 |
| cg02058949 | 16.82  | 7.65  | 2.80E-02 | 29.94  | 23.66 | 2.06E-01 | -70.25  | 74.05  | 3.43E-01 | 18.43  | 8.41  | 2.85E-02 | -14.57 | 32.16 | 6.51E-01 |
| cg00257659 | -38.32 | 17.44 | 2.80E-02 | -30.45 | 23.93 | 2.03E-01 | 27.26   | 63.64  | 6.68E-01 | -60.33 | 42.31 | 1.54E-01 | -62.30 | 36.88 | 9.12E-02 |
| cg14059339 | 4.40   | 2.00  | 2.80E-02 | 4.78   | 2.71  | 7.79E-02 | 8.50    | 4.51   | 5.96E-02 | 3.38   | 4.98  | 4.97E-01 | -4.47  | 6.46  | 4.89E-01 |
| cg01630925 | 12.18  | 5.54  | 2.80E-02 | 4.89   | 14.77 | 7.41E-01 | -1.94   | 31.65  | 9.51E-01 | 13.92  | 6.37  | 2.87E-02 | 14.10  | 20.94 | 5.01E-01 |
| cg00880290 | -32.34 | 14.72 | 2.80E-02 | 2.30   | 40.02 | 9.54E-01 | -43.77  | 198.36 | 8.25E-01 | -43.91 | 16.58 | 8.10E-03 | 30.96  | 55.26 | 5.75E-01 |

|            |        |       |          |        |       |          |         |        |          |        |       |          |        |       |          |
|------------|--------|-------|----------|--------|-------|----------|---------|--------|----------|--------|-------|----------|--------|-------|----------|
| cg26966828 | 9.44   | 4.30  | 2.80E-02 | 13.02  | 7.23  | 7.17E-02 | 12.49   | 9.83   | 2.04E-01 | 12.88  | 9.46  | 1.74E-01 | -0.83  | 8.62  | 9.23E-01 |
| cg14355941 | -11.72 | 5.34  | 2.81E-02 | -4.53  | 14.72 | 7.58E-01 | 16.91   | 29.52  | 5.67E-01 | -16.00 | 6.10  | 8.68E-03 | 8.10   | 20.08 | 6.87E-01 |
| cg10281996 | -28.59 | 13.02 | 2.81E-02 | -34.34 | 16.47 | 3.70E-02 | -30.65  | 45.88  | 5.04E-01 | -1.07  | 43.27 | 9.80E-01 | -22.39 | 28.81 | 4.37E-01 |
| cg03115530 | 20.40  | 9.29  | 2.81E-02 | 8.19   | 15.68 | 6.02E-01 | 32.54   | 17.48  | 6.27E-02 | 29.89  | 19.74 | 1.30E-01 | 11.87  | 24.33 | 6.26E-01 |
| cg02808075 | -27.28 | 12.42 | 2.81E-02 | -50.09 | 28.03 | 7.39E-02 | -135.74 | 206.41 | 5.11E-01 | -21.33 | 14.58 | 1.43E-01 | -19.83 | 45.59 | 6.64E-01 |
| cg24519867 | -11.87 | 5.41  | 2.81E-02 | -27.74 | 12.75 | 2.95E-02 | -11.88  | 18.84  | 5.28E-01 | -7.11  | 6.67  | 2.86E-01 | -15.24 | 19.00 | 4.23E-01 |
| cg02116251 | -43.58 | 19.84 | 2.81E-02 | -32.23 | 27.56 | 2.42E-01 | -85.13  | 93.24  | 3.61E-01 | -68.35 | 36.27 | 5.95E-02 | -18.71 | 53.57 | 7.27E-01 |
| cg05715828 | -7.62  | 3.47  | 2.81E-02 | -6.67  | 4.87  | 1.71E-01 | -11.00  | 8.26   | 1.83E-01 | -5.58  | 10.14 | 5.82E-01 | -8.23  | 7.75  | 2.88E-01 |
| cg01157070 | 14.74  | 6.71  | 2.81E-02 | 29.74  | 22.42 | 1.85E-01 | 6.83    | 77.13  | 9.29E-01 | 16.05  | 7.33  | 2.85E-02 | -22.72 | 26.64 | 3.94E-01 |
| cg24770856 | -40.71 | 18.54 | 2.81E-02 | -48.99 | 21.63 | 2.35E-02 | -121.53 | 140.37 | 3.87E-01 | 78.45  | 86.85 | 3.66E-01 | -30.55 | 41.19 | 4.58E-01 |
| cg12858895 | -9.21  | 4.19  | 2.81E-02 | -11.73 | 11.34 | 3.01E-01 | 11.02   | 24.60  | 6.54E-01 | -8.96  | 4.81  | 6.26E-02 | -14.91 | 15.27 | 3.29E-01 |
| cg21599324 | -14.19 | 6.46  | 2.81E-02 | -13.85 | 9.31  | 1.37E-01 | -20.01  | 14.44  | 1.66E-01 | -13.59 | 20.31 | 5.03E-01 | -9.88  | 13.88 | 4.77E-01 |
| cg12376402 | 36.50  | 16.62 | 2.81E-02 | 42.04  | 19.62 | 3.21E-02 | -30.04  | 74.61  | 6.87E-01 | 130.18 | 70.28 | 6.40E-02 | 15.13  | 32.16 | 6.38E-01 |
| cg22626169 | 5.75   | 2.62  | 2.81E-02 | 4.43   | 3.42  | 1.95E-01 | 12.24   | 6.52   | 6.05E-02 | 8.17   | 7.90  | 3.01E-01 | 1.96   | 7.01  | 7.80E-01 |
| cg18269219 | 19.14  | 8.72  | 2.81E-02 | 3.69   | 15.73 | 8.15E-01 | 23.61   | 19.43  | 2.24E-01 | 18.43  | 14.42 | 2.01E-01 | 51.69  | 24.53 | 3.51E-02 |
| cg13176012 | 13.50  | 6.15  | 2.81E-02 | 21.61  | 10.68 | 4.30E-02 | 4.65    | 16.64  | 7.80E-01 | 17.86  | 10.66 | 9.38E-02 | -1.18  | 13.75 | 9.32E-01 |
| cg09234995 | -33.28 | 15.15 | 2.81E-02 | -36.57 | 18.98 | 5.41E-02 | -84.10  | 67.89  | 2.15E-01 | 63.96  | 73.51 | 3.84E-01 | -31.43 | 29.13 | 2.81E-01 |
| cg26559209 | 12.49  | 5.69  | 2.81E-02 | 19.48  | 8.28  | 1.86E-02 | 3.66    | 15.33  | 8.11E-01 | 25.00  | 16.97 | 1.41E-01 | -0.07  | 10.78 | 9.95E-01 |
| cg16707405 | 24.44  | 11.13 | 2.81E-02 | 18.76  | 25.40 | 4.60E-01 | 40.52   | 49.68  | 4.15E-01 | 32.40  | 14.04 | 2.10E-02 | -11.96 | 30.92 | 6.99E-01 |
| cg08907926 | -16.12 | 7.34  | 2.81E-02 | -16.56 | 11.33 | 1.44E-01 | -38.25  | 19.96  | 5.53E-02 | -5.10  | 5.16  | 3.23E-01 | -30.18 | 14.41 | 3.63E-02 |
| cg05717677 | -31.77 | 14.47 | 2.81E-02 | 5.14   | 26.64 | 8.47E-01 | -9.35   | 66.32  | 8.88E-01 | -50.95 | 16.59 | 2.14E-03 | -31.30 | 37.03 | 3.98E-01 |
| cg26168772 | 13.10  | 5.97  | 2.81E-02 | 6.82   | 8.28  | 4.10E-01 | 21.09   | 16.31  | 1.96E-01 | 24.95  | 9.11  | 6.19E-03 | -1.16  | 13.38 | 9.31E-01 |
| cg21747496 | -6.91  | 3.15  | 2.81E-02 | -9.80  | 4.23  | 2.05E-02 | -6.45   | 7.35   | 3.80E-01 | 12.36  | 15.53 | 4.26E-01 | -3.65  | 6.69  | 5.86E-01 |
| cg23271556 | 19.32  | 8.80  | 2.81E-02 | 31.49  | 15.94 | 4.82E-02 | 17.00   | 26.68  | 5.24E-01 | 15.10  | 15.67 | 3.35E-01 | 11.49  | 16.89 | 4.96E-01 |
| cg13710553 | 8.05   | 3.67  | 2.81E-02 | 8.36   | 4.84  | 8.42E-02 | 15.52   | 9.54   | 1.04E-01 | 9.34   | 10.03 | 3.52E-01 | -1.99  | 9.64  | 8.36E-01 |
| cg09869811 | 26.68  | 12.15 | 2.81E-02 | 15.54  | 22.88 | 4.97E-01 | 39.42   | 52.38  | 4.52E-01 | 24.71  | 16.95 | 1.45E-01 | 49.71  | 31.32 | 1.12E-01 |
| cg13186559 | 8.84   | 4.03  | 2.81E-02 | 9.72   | 5.63  | 8.44E-02 | 10.92   | 9.69   | 2.60E-01 | 8.61   | 10.15 | 3.96E-01 | 3.97   | 10.07 | 6.93E-01 |
| cg05765605 | 3.51   | 1.60  | 2.81E-02 | 2.42   | 2.05  | 2.38E-01 | 5.06    | 3.29   | 1.25E-01 | 10.98  | 7.27  | 1.31E-01 | 2.92   | 4.86  | 5.48E-01 |
| cg07398614 | 15.76  | 7.18  | 2.81E-02 | -11.04 | 25.09 | 6.60E-01 | 18.72   | 44.94  | 6.77E-01 | 19.29  | 8.00  | 1.59E-02 | 7.56   | 24.11 | 7.54E-01 |
| cg00975226 | -12.35 | 5.62  | 2.81E-02 | -8.71  | 10.69 | 4.15E-01 | -3.53   | 15.82  | 8.23E-01 | -11.37 | 8.26  | 1.69E-01 | -31.70 | 15.42 | 3.98E-02 |
| cg06027807 | 22.75  | 10.37 | 2.81E-02 | 24.48  | 14.36 | 8.83E-02 | 5.68    | 33.09  | 8.64E-01 | 43.71  | 32.29 | 1.76E-01 | 17.78  | 19.66 | 3.66E-01 |
| cg09069593 | 19.70  | 8.97  | 2.81E-02 | 18.42  | 13.00 | 1.56E-01 | 28.15   | 24.09  | 2.43E-01 | 20.96  | 22.09 | 3.43E-01 | 16.18  | 19.13 | 3.98E-01 |
| cg02972788 | -24.22 | 11.03 | 2.81E-02 | -64.64 | 44.57 | 1.47E-01 | 145.07  | 158.89 | 3.61E-01 | -20.04 | 11.77 | 8.87E-02 | -60.05 | 46.64 | 1.98E-01 |
| cg00355784 | 7.87   | 3.58  | 2.81E-02 | 7.28   | 7.03  | 3.00E-01 | -3.85   | 10.66  | 7.18E-01 | 8.35   | 4.89  | 8.76E-02 | 21.47  | 11.98 | 7.30E-02 |
| cg22203776 | 19.11  | 8.70  | 2.81E-02 | 31.46  | 14.49 | 2.99E-02 | 1.14    | 22.97  | 9.60E-01 | 34.29  | 19.79 | 8.31E-02 | 3.17   | 15.84 | 8.41E-01 |

|            |        |       |          |        |       |          |         |        |          |        |        |          |        |       |          |
|------------|--------|-------|----------|--------|-------|----------|---------|--------|----------|--------|--------|----------|--------|-------|----------|
| cg19981475 | -12.42 | 5.66  | 2.81E-02 | -14.62 | 11.00 | 1.84E-01 | 0.98    | 13.44  | 9.42E-01 | -16.63 | 8.22   | 4.30E-02 | -10.05 | 19.57 | 6.08E-01 |
| cg06505423 | -13.99 | 6.38  | 2.82E-02 | -4.92  | 17.75 | 7.82E-01 | -22.79  | 34.81  | 5.13E-01 | -14.77 | 7.37   | 4.52E-02 | -17.32 | 21.27 | 4.15E-01 |
| cg15651650 | 15.83  | 7.21  | 2.82E-02 | 14.95  | 21.35 | 4.84E-01 | 113.41  | 102.07 | 2.67E-01 | 13.60  | 7.99   | 8.87E-02 | 37.29  | 27.96 | 1.82E-01 |
| cg14468692 | 6.51   | 2.97  | 2.82E-02 | 6.56   | 3.88  | 9.10E-02 | 11.01   | 6.75   | 1.03E-01 | 7.91   | 11.44  | 4.89E-01 | 0.13   | 7.54  | 9.86E-01 |
| cg06332339 | 102.84 | 46.85 | 2.82E-02 | 106.64 | 71.06 | 1.33E-01 | 171.73  | 147.13 | 2.43E-01 | 120.56 | 110.42 | 2.75E-01 | 61.17  | 87.93 | 4.87E-01 |
| cg03922095 | 17.30  | 7.88  | 2.82E-02 | 9.25   | 20.19 | 6.47E-01 | 32.42   | 22.63  | 1.52E-01 | 16.35  | 9.65   | 9.04E-02 | 17.74  | 32.24 | 5.82E-01 |
| cg23983783 | 8.59   | 3.91  | 2.82E-02 | 9.26   | 5.68  | 1.03E-01 | 15.34   | 10.01  | 1.26E-01 | 8.08   | 8.47   | 3.40E-01 | 0.76   | 9.84  | 9.39E-01 |
| cg15814923 | 30.12  | 13.72 | 2.82E-02 | 44.36  | 43.81 | 3.11E-01 | 4.76    | 218.65 | 9.83E-01 | 32.15  | 14.94  | 3.14E-02 | -24.97 | 58.73 | 6.71E-01 |
| cg15475323 | 9.73   | 4.43  | 2.82E-02 | 10.12  | 8.56  | 2.37E-01 | 3.13    | 9.73   | 7.48E-01 | 7.70   | 7.37   | 2.96E-01 | 21.94  | 10.97 | 4.54E-02 |
| cg11561737 | -18.62 | 8.48  | 2.82E-02 | 12.95  | 40.13 | 7.47E-01 | -114.25 | 164.79 | 4.88E-01 | -19.34 | 8.98   | 3.13E-02 | -27.20 | 34.53 | 4.31E-01 |
| cg15571353 | 11.47  | 5.23  | 2.82E-02 | 9.27   | 8.73  | 2.88E-01 | 21.02   | 12.45  | 9.15E-02 | 13.22  | 9.64   | 1.70E-01 | 3.25   | 12.63 | 7.97E-01 |
| cg16824319 | 12.44  | 5.67  | 2.82E-02 | 9.40   | 7.90  | 2.35E-01 | 12.31   | 12.59  | 3.28E-01 | 26.00  | 18.78  | 1.66E-01 | 14.30  | 12.94 | 2.69E-01 |
| cg06773873 | -16.76 | 7.64  | 2.82E-02 | -20.30 | 15.35 | 1.86E-01 | -4.55   | 15.55  | 7.70E-01 | -13.67 | 12.52  | 2.75E-01 | -39.85 | 20.47 | 5.15E-02 |
| cg10347418 | -18.38 | 8.38  | 2.82E-02 | -6.97  | 21.10 | 7.41E-01 | 9.22    | 30.12  | 7.60E-01 | -25.15 | 10.13  | 1.30E-02 | -9.76  | 29.43 | 7.40E-01 |
| cg21422623 | -8.08  | 3.68  | 2.82E-02 | -3.16  | 5.32  | 5.53E-01 | -9.26   | 8.18   | 2.58E-01 | -12.20 | 9.18   | 1.84E-01 | -17.35 | 9.29  | 6.18E-02 |
| cg07978099 | 6.69   | 3.05  | 2.82E-02 | 9.15   | 4.66  | 4.96E-02 | 9.94    | 6.99   | 1.55E-01 | 4.69   | 7.33   | 5.22E-01 | 0.36   | 6.66  | 9.57E-01 |
| cg03933646 | 38.20  | 17.41 | 2.82E-02 | 59.27  | 22.19 | 7.55E-03 | 46.70   | 25.33  | 6.52E-02 | 4.98   | 10.50  | 6.35E-01 | 64.47  | 30.46 | 3.43E-02 |
| cg18823499 | -10.13 | 4.62  | 2.82E-02 | -17.60 | 6.99  | 1.18E-02 | -8.13   | 11.24  | 4.69E-01 | -5.01  | 15.03  | 7.39E-01 | -2.00  | 8.42  | 8.12E-01 |
| cg05526498 | 9.27   | 4.22  | 2.82E-02 | 9.54   | 5.49  | 8.24E-02 | 14.64   | 9.45   | 1.22E-01 | 4.77   | 14.81  | 7.47E-01 | 2.49   | 11.80 | 8.33E-01 |
| cg17873910 | -29.91 | 13.63 | 2.82E-02 | -33.87 | 18.88 | 7.29E-02 | -48.58  | 42.69  | 2.55E-01 | 0.30   | 40.11  | 9.94E-01 | -28.09 | 26.65 | 2.92E-01 |
| cg16362378 | -18.45 | 8.41  | 2.82E-02 | -22.09 | 18.78 | 2.39E-01 | 24.04   | 49.86  | 6.30E-01 | -20.32 | 10.16  | 4.56E-02 | -9.23  | 28.57 | 7.47E-01 |
| cg03889540 | 6.27   | 2.86  | 2.82E-02 | 4.46   | 4.03  | 2.69E-01 | 1.95    | 7.29   | 7.89E-01 | 12.49  | 8.35   | 1.35E-01 | 9.93   | 5.97  | 9.63E-02 |
| cg06785701 | -5.65  | 2.58  | 2.82E-02 | -0.59  | 4.19  | 8.88E-01 | -4.13   | 6.32   | 5.14E-01 | -9.02  | 3.93   | 2.17E-02 | -13.86 | 8.76  | 1.14E-01 |
| cg23690528 | 11.72  | 5.34  | 2.82E-02 | 9.52   | 12.81 | 4.57E-01 | 29.89   | 14.82  | 4.36E-02 | 9.82   | 7.62   | 1.98E-01 | 6.62   | 11.81 | 5.75E-01 |
| cg04215564 | -16.20 | 7.38  | 2.82E-02 | -30.22 | 14.50 | 3.72E-02 | 6.06    | 16.54  | 7.14E-01 | -20.08 | 11.41  | 7.85E-02 | -9.53  | 21.10 | 6.52E-01 |
| cg07017437 | -5.54  | 2.52  | 2.82E-02 | -8.90  | 4.77  | 6.24E-02 | -10.26  | 7.12   | 1.50E-01 | -3.58  | 3.73   | 3.37E-01 | -0.93  | 6.79  | 8.91E-01 |
| cg23189194 | 6.00   | 2.73  | 2.82E-02 | 7.89   | 5.33  | 1.39E-01 | 1.43    | 5.75   | 8.04E-01 | 3.92   | 4.47   | 3.80E-01 | 15.66  | 7.41  | 3.45E-02 |
| cg20864389 | 34.35  | 15.66 | 2.82E-02 | 44.52  | 21.81 | 4.13E-02 | 39.70   | 89.27  | 6.57E-01 | 68.12  | 58.74  | 2.46E-01 | 13.99  | 25.30 | 5.80E-01 |
| cg18556676 | 11.68  | 5.32  | 2.82E-02 | 15.42  | 9.34  | 9.87E-02 | 11.57   | 14.72  | 4.32E-01 | 17.35  | 9.98   | 8.22E-02 | 0.86   | 10.43 | 9.34E-01 |
| cg08462030 | -10.60 | 4.83  | 2.82E-02 | -21.63 | 9.70  | 2.58E-02 | 2.24    | 13.37  | 8.67E-01 | -7.86  | 7.30   | 2.82E-01 | -11.36 | 11.26 | 3.13E-01 |
| cg24669856 | -41.77 | 19.04 | 2.82E-02 | -53.43 | 22.98 | 2.00E-02 | -13.35  | 108.22 | 9.02E-01 | -0.63  | 83.79  | 9.94E-01 | -20.09 | 39.62 | 6.12E-01 |
| cg12742209 | 19.86  | 9.05  | 2.82E-02 | 37.86  | 18.44 | 4.01E-02 | 21.07   | 20.88  | 3.13E-01 | 11.16  | 13.15  | 3.96E-01 | 15.27  | 28.97 | 5.98E-01 |
| cg01035160 | 26.41  | 12.04 | 2.82E-02 | 18.52  | 18.53 | 3.18E-01 | -11.34  | 54.38  | 8.35E-01 | 21.28  | 28.15  | 4.50E-01 | 44.06  | 20.45 | 3.12E-02 |
| cg06759265 | 13.78  | 6.28  | 2.82E-02 | 18.56  | 9.51  | 5.10E-02 | 11.18   | 17.47  | 5.22E-01 | 13.44  | 15.37  | 3.82E-01 | 7.46   | 12.15 | 5.39E-01 |
| cg14633456 | 20.22  | 9.22  | 2.82E-02 | 36.81  | 31.45 | 2.42E-01 | -48.79  | 132.29 | 7.12E-01 | 19.47  | 10.02  | 5.21E-02 | 13.05  | 36.38 | 7.20E-01 |

|            |        |       |          |         |       |          |         |        |          |        |       |          |        |       |          |
|------------|--------|-------|----------|---------|-------|----------|---------|--------|----------|--------|-------|----------|--------|-------|----------|
| cg06848073 | 19.73  | 8.99  | 2.82E-02 | 22.63   | 15.96 | 1.56E-01 | 29.12   | 16.60  | 7.95E-02 | 16.17  | 18.44 | 3.81E-01 | 1.06   | 23.14 | 9.64E-01 |
| cg08493590 | 8.60   | 3.92  | 2.82E-02 | 6.31    | 5.16  | 2.21E-01 | 7.66    | 9.72   | 4.30E-01 | 14.98  | 16.67 | 3.69E-01 | 14.12  | 8.69  | 1.04E-01 |
| cg00022688 | -39.22 | 17.88 | 2.82E-02 | -45.46  | 22.02 | 3.90E-02 | -159.15 | 100.61 | 1.14E-01 | 10.67  | 49.05 | 8.28E-01 | -32.05 | 42.58 | 4.52E-01 |
| cg23435671 | 6.85   | 3.12  | 2.82E-02 | 4.05    | 4.64  | 3.83E-01 | 11.79   | 6.75   | 8.07E-02 | 8.04   | 8.36  | 3.37E-01 | 7.10   | 7.10  | 3.17E-01 |
| cg03414898 | 8.44   | 3.85  | 2.82E-02 | 10.57   | 6.89  | 1.25E-01 | 2.28    | 11.13  | 8.37E-01 | 8.47   | 5.40  | 1.17E-01 | 9.32   | 15.36 | 5.44E-01 |
| cg12576688 | 17.01  | 7.75  | 2.82E-02 | 12.38   | 17.46 | 4.78E-01 | 22.22   | 41.31  | 5.91E-01 | 13.89  | 9.36  | 1.38E-01 | 52.53  | 27.26 | 5.39E-02 |
| cg01802453 | 18.55  | 8.46  | 2.83E-02 | 35.69   | 16.25 | 2.80E-02 | 1.56    | 21.89  | 9.43E-01 | 26.34  | 14.69 | 7.30E-02 | 1.84   | 16.05 | 9.09E-01 |
| cg16551349 | 28.14  | 12.83 | 2.83E-02 | 27.52   | 15.19 | 7.01E-02 | 39.45   | 53.72  | 4.63E-01 | 11.08  | 12.66 | 3.81E-01 | 82.21  | 32.07 | 1.04E-02 |
| cg16143997 | -13.10 | 5.97  | 2.83E-02 | -23.03  | 10.07 | 2.21E-02 | -14.43  | 13.66  | 2.91E-01 | -5.70  | 12.31 | 6.43E-01 | -4.04  | 12.68 | 7.50E-01 |
| cg01195564 | -7.24  | 3.30  | 2.83E-02 | -8.11   | 5.34  | 1.29E-01 | -4.29   | 7.89   | 5.86E-01 | -6.87  | 5.45  | 2.08E-01 | -11.46 | 11.97 | 3.39E-01 |
| cg09966309 | -8.34  | 3.80  | 2.83E-02 | -8.02   | 5.22  | 1.24E-01 | -6.20   | 9.45   | 5.12E-01 | -2.64  | 10.30 | 7.98E-01 | -15.95 | 9.21  | 8.34E-02 |
| cg14610633 | 37.68  | 17.18 | 2.83E-02 | 49.51   | 23.66 | 3.64E-02 | 37.40   | 55.00  | 4.97E-01 | 18.11  | 62.84 | 7.73E-01 | 21.89  | 31.34 | 4.85E-01 |
| cg09434667 | -10.42 | 4.75  | 2.83E-02 | -10.35  | 7.67  | 1.77E-01 | -10.66  | 11.01  | 3.33E-01 | -8.64  | 10.29 | 4.01E-01 | -12.07 | 10.19 | 2.36E-01 |
| cg06851827 | -57.43 | 26.18 | 2.83E-02 | -15.60  | 24.29 | 5.21E-01 | -131.81 | 48.14  | 6.18E-03 | -42.75 | 51.08 | 4.03E-01 | -76.04 | 42.12 | 7.11E-02 |
| cg23457166 | -7.92  | 3.61  | 2.83E-02 | -11.90  | 5.90  | 4.37E-02 | -7.83   | 6.95   | 2.60E-01 | -1.01  | 8.14  | 9.01E-01 | -7.24  | 9.05  | 4.24E-01 |
| cg27141474 | 6.99   | 3.19  | 2.83E-02 | 10.20   | 4.24  | 1.61E-02 | 2.53    | 6.81   | 7.10E-01 | 4.97   | 10.62 | 6.40E-01 | 1.78   | 8.96  | 8.42E-01 |
| cg05603367 | 14.26  | 6.50  | 2.83E-02 | 8.43    | 7.17  | 2.40E-01 | 32.02   | 10.70  | 2.77E-03 | -10.10 | 25.79 | 6.95E-01 | 11.81  | 9.86  | 2.31E-01 |
| cg02743878 | 8.96   | 4.09  | 2.83E-02 | 10.77   | 5.78  | 6.23E-02 | 13.27   | 9.84   | 1.78E-01 | 7.79   | 10.67 | 4.65E-01 | 0.81   | 9.61  | 9.32E-01 |
| cg13047308 | 5.94   | 2.71  | 2.83E-02 | 3.24    | 3.52  | 3.57E-01 | 16.36   | 7.05   | 2.03E-02 | 7.27   | 7.40  | 3.26E-01 | 5.04   | 7.67  | 5.11E-01 |
| cg03220751 | -29.65 | 13.52 | 2.83E-02 | -49.92  | 41.06 | 2.24E-01 | 88.58   | 156.20 | 5.71E-01 | -30.82 | 15.03 | 4.04E-02 | 0.20   | 49.18 | 9.97E-01 |
| cg19197652 | -14.40 | 6.57  | 2.83E-02 | -35.68  | 17.43 | 4.06E-02 | 8.66    | 34.33  | 8.01E-01 | -11.01 | 7.55  | 1.45E-01 | -20.48 | 25.86 | 4.28E-01 |
| cg17985972 | -7.41  | 3.38  | 2.83E-02 | -7.66   | 5.15  | 1.37E-01 | -7.10   | 8.16   | 3.84E-01 | -11.84 | 7.75  | 1.26E-01 | -3.10  | 7.42  | 6.76E-01 |
| cg22537474 | 19.20  | 8.75  | 2.83E-02 | 20.42   | 17.77 | 2.51E-01 | 28.10   | 32.29  | 3.84E-01 | 22.33  | 13.57 | 9.97E-02 | 10.76  | 16.92 | 5.25E-01 |
| cg12222244 | -13.07 | 5.96  | 2.83E-02 | -10.77  | 13.65 | 4.30E-01 | 3.91    | 24.77  | 8.75E-01 | -15.28 | 7.47  | 4.07E-02 | -13.18 | 17.60 | 4.54E-01 |
| cg00660167 | 4.44   | 2.02  | 2.83E-02 | 4.60    | 2.76  | 9.53E-02 | 5.01    | 3.85   | 1.92E-01 | 5.95   | 8.24  | 4.70E-01 | 1.72   | 5.78  | 7.66E-01 |
| cg16718260 | 31.03  | 14.15 | 2.83E-02 | 13.86   | 24.57 | 5.73E-01 | -36.13  | 89.28  | 6.86E-01 | 35.74  | 20.16 | 7.62E-02 | 64.65  | 36.47 | 7.63E-02 |
| cg09033857 | -73.57 | 33.55 | 2.83E-02 | -168.57 | 82.72 | 4.16E-02 | -462.30 | 341.07 | 1.75E-01 | -51.71 | 41.82 | 2.16E-01 | -46.09 | 73.50 | 5.31E-01 |
| cg19429405 | 5.35   | 2.44  | 2.83E-02 | 5.08    | 3.47  | 1.43E-01 | 8.06    | 6.10   | 1.86E-01 | 7.34   | 5.04  | 1.45E-01 | -1.56  | 7.33  | 8.31E-01 |
| cg20764817 | 18.27  | 8.33  | 2.83E-02 | 50.57   | 21.45 | 1.84E-02 | -3.78   | 30.83  | 9.02E-01 | 13.33  | 8.44  | 1.14E-01 | 26.55  | 32.90 | 4.20E-01 |
| cg12263377 | -13.23 | 6.03  | 2.83E-02 | -24.74  | 9.28  | 7.65E-03 | -5.50   | 13.50  | 6.84E-01 | -6.41  | 17.38 | 7.12E-01 | -3.48  | 11.91 | 7.70E-01 |
| cg03879160 | -17.37 | 7.92  | 2.83E-02 | -25.69  | 12.76 | 4.40E-02 | -0.86   | 18.64  | 9.63E-01 | -4.95  | 15.41 | 7.48E-01 | -35.30 | 19.21 | 6.61E-02 |
| cg11415512 | -43.84 | 19.99 | 2.83E-02 | -54.29  | 30.11 | 7.14E-02 | -73.21  | 123.11 | 5.52E-01 | -57.15 | 34.68 | 9.94E-02 | 5.03   | 44.63 | 9.10E-01 |
| cg19853927 | 16.41  | 7.49  | 2.83E-02 | 20.32   | 9.61  | 3.45E-02 | 8.79    | 22.32  | 6.94E-01 | -0.56  | 32.03 | 9.86E-01 | 13.83  | 15.72 | 3.79E-01 |
| cg05874549 | 17.23  | 7.86  | 2.83E-02 | 13.66   | 12.95 | 2.92E-01 | 5.65    | 15.83  | 7.21E-01 | 18.30  | 19.02 | 3.36E-01 | 35.83  | 16.97 | 3.48E-02 |
| cg02521750 | 8.08   | 3.69  | 2.83E-02 | 7.15    | 5.70  | 2.10E-01 | 9.25    | 8.02   | 2.48E-01 | -0.29  | 10.28 | 9.78E-01 | 13.15  | 7.51  | 7.99E-02 |



|            |        |       |          |        |       |          |         |        |          |         |       |          |        |       |          |
|------------|--------|-------|----------|--------|-------|----------|---------|--------|----------|---------|-------|----------|--------|-------|----------|
| cg23679992 | -11.59 | 5.28  | 2.83E-02 | -18.01 | 8.27  | 2.95E-02 | -11.10  | 11.80  | 3.47E-01 | -7.39   | 15.45 | 6.32E-01 | -4.18  | 10.09 | 6.78E-01 |
| cg07622521 | 15.69  | 7.15  | 2.83E-02 | 19.30  | 10.74 | 7.24E-02 | 18.15   | 17.70  | 3.05E-01 | 10.08   | 18.88 | 5.93E-01 | 10.87  | 14.33 | 4.48E-01 |
| cg23442187 | 11.32  | 5.16  | 2.83E-02 | 17.64  | 8.81  | 4.52E-02 | 5.07    | 11.21  | 6.51E-01 | 6.63    | 8.82  | 4.52E-01 | 18.84  | 16.20 | 2.45E-01 |
| cg14905577 | -11.39 | 5.20  | 2.83E-02 | 7.65   | 14.33 | 5.94E-01 | -11.63  | 25.31  | 6.46E-01 | -15.75  | 5.99  | 8.53E-03 | -0.62  | 19.22 | 9.74E-01 |
| cg02029478 | 26.60  | 12.13 | 2.83E-02 | -28.02 | 38.32 | 4.65E-01 | 15.60   | 198.33 | 9.37E-01 | 33.23   | 13.28 | 1.23E-02 | 26.22  | 48.72 | 5.90E-01 |
| cg26782451 | 17.95  | 8.19  | 2.83E-02 | 24.92  | 13.39 | 6.26E-02 | 16.12   | 14.40  | 2.63E-01 | 10.38   | 19.11 | 5.87E-01 | 12.68  | 23.74 | 5.93E-01 |
| cg12099423 | 3.05   | 1.39  | 2.83E-02 | 3.69   | 1.86  | 4.73E-02 | 3.71    | 2.97   | 2.12E-01 | -0.78   | 5.43  | 8.86E-01 | 1.44   | 3.53  | 6.83E-01 |
| cg07689503 | -24.20 | 11.04 | 2.83E-02 | -9.57  | 32.73 | 7.70E-01 | -109.14 | 189.28 | 5.64E-01 | -25.57  | 12.64 | 4.30E-02 | -26.96 | 31.91 | 3.98E-01 |
| cg22988346 | -11.76 | 5.36  | 2.83E-02 | -15.29 | 8.44  | 7.01E-02 | 1.40    | 14.93  | 9.25E-01 | -16.21  | 12.44 | 1.92E-01 | -9.79  | 10.12 | 3.34E-01 |
| cg17926816 | 15.60  | 7.12  | 2.83E-02 | 20.19  | 10.66 | 5.83E-02 | 20.45   | 14.60  | 1.61E-01 | 11.55   | 16.21 | 4.76E-01 | -3.81  | 20.19 | 8.50E-01 |
| cg00376816 | -6.19  | 2.82  | 2.83E-02 | -6.97  | 4.94  | 1.58E-01 | -18.78  | 13.43  | 1.62E-01 | -2.76   | 4.04  | 4.95E-01 | -12.22 | 7.49  | 1.03E-01 |
| cg12587904 | 25.01  | 11.41 | 2.84E-02 | 23.64  | 29.93 | 4.30E-01 | -64.43  | 111.85 | 5.65E-01 | 27.76   | 13.01 | 3.28E-02 | 11.89  | 41.70 | 7.76E-01 |
| cg14236443 | 9.06   | 4.13  | 2.84E-02 | 8.78   | 5.54  | 1.13E-01 | 22.23   | 10.02  | 2.66E-02 | 5.16    | 11.83 | 6.62E-01 | -1.45  | 10.55 | 8.91E-01 |
| cg21809711 | 40.12  | 18.30 | 2.84E-02 | 14.02  | 34.07 | 6.81E-01 | -50.40  | 193.10 | 7.94E-01 | 47.76   | 23.59 | 4.29E-02 | 77.10  | 57.55 | 1.80E-01 |
| cg07780517 | 5.19   | 2.37  | 2.84E-02 | 7.43   | 3.47  | 3.21E-02 | 1.27    | 5.11   | 8.04E-01 | 6.95    | 9.38  | 4.59E-01 | 3.96   | 4.70  | 3.99E-01 |
| cg09729866 | 11.67  | 5.33  | 2.84E-02 | 2.89   | 6.59  | 6.61E-01 | 17.95   | 9.42   | 5.67E-02 | 3.79    | 14.67 | 7.96E-01 | 22.96  | 9.14  | 1.20E-02 |
| cg00319655 | 9.42   | 4.30  | 2.84E-02 | 9.66   | 6.59  | 1.43E-01 | 1.84    | 11.69  | 8.75E-01 | 8.89    | 8.47  | 2.94E-01 | 15.22  | 10.06 | 1.30E-01 |
| cg05165087 | -10.47 | 4.77  | 2.84E-02 | -9.11  | 12.43 | 4.64E-01 | 5.05    | 29.50  | 8.64E-01 | -11.35  | 5.52  | 3.97E-02 | -9.78  | 17.14 | 5.68E-01 |
| cg00636946 | -6.48  | 2.96  | 2.84E-02 | -4.94  | 4.53  | 2.75E-01 | -7.04   | 5.97   | 2.38E-01 | -8.46   | 6.81  | 2.14E-01 | -7.56  | 7.94  | 3.42E-01 |
| cg16558348 | -36.78 | 16.78 | 2.84E-02 | -49.02 | 20.78 | 1.84E-02 | -22.25  | 57.89  | 7.01E-01 | 5.08    | 69.28 | 9.41E-01 | -15.88 | 37.01 | 6.68E-01 |
| cg13396830 | -85.35 | 38.94 | 2.84E-02 | -43.83 | 24.99 | 7.94E-02 | -83.59  | 115.47 | 4.69E-01 | -183.13 | 44.09 | 3.27E-05 | -39.77 | 48.60 | 4.13E-01 |
| cg19890277 | 25.89  | 11.81 | 2.84E-02 | 44.33  | 40.79 | 2.77E-01 | 54.82   | 148.39 | 7.12E-01 | 22.62   | 12.93 | 8.02E-02 | 39.21  | 43.07 | 3.63E-01 |
| cg19898526 | -32.08 | 14.64 | 2.84E-02 | -29.65 | 18.35 | 1.06E-01 | 35.42   | 51.16  | 4.89E-01 | -86.34  | 44.87 | 5.43E-02 | -35.70 | 25.45 | 1.61E-01 |
| cg09221478 | -12.19 | 5.56  | 2.84E-02 | -14.95 | 8.94  | 9.47E-02 | -11.57  | 12.15  | 3.41E-01 | -8.62   | 13.77 | 5.31E-01 | -10.72 | 11.33 | 3.44E-01 |
| cg11119275 | -14.10 | 6.43  | 2.84E-02 | -8.19  | 14.45 | 5.71E-01 | 2.98    | 25.38  | 9.07E-01 | -15.68  | 8.23  | 5.68E-02 | -24.36 | 18.05 | 1.77E-01 |
| cg24504349 | 5.10   | 2.33  | 2.84E-02 | 4.76   | 3.21  | 1.39E-01 | 5.09    | 6.63   | 4.43E-01 | 9.50    | 4.99  | 5.72E-02 | -0.63  | 6.35  | 9.21E-01 |
| cg02898883 | -39.28 | 17.92 | 2.84E-02 | -44.14 | 23.88 | 6.46E-02 | -62.78  | 48.90  | 1.99E-01 | -40.95  | 56.22 | 4.66E-01 | -9.13  | 39.98 | 8.19E-01 |
| cg24617504 | 19.08  | 8.71  | 2.84E-02 | 32.02  | 10.19 | 1.69E-03 | 37.10   | 18.19  | 4.14E-02 | 0.03    | 12.89 | 9.98E-01 | 10.01  | 13.10 | 4.45E-01 |
| cg02086310 | 13.07  | 5.96  | 2.84E-02 | 17.28  | 8.81  | 4.97E-02 | 25.41   | 20.58  | 2.17E-01 | 15.91   | 21.08 | 4.51E-01 | 4.61   | 9.70  | 6.35E-01 |
| cg14707392 | 38.00  | 17.34 | 2.84E-02 | 38.64  | 19.91 | 5.23E-02 | 44.82   | 117.38 | 7.03E-01 | 72.13   | 92.02 | 4.33E-01 | 28.00  | 40.36 | 4.88E-01 |
| cg05583014 | -21.00 | 9.58  | 2.84E-02 | -21.94 | 21.01 | 2.96E-01 | -17.35  | 42.87  | 6.86E-01 | -15.21  | 12.12 | 2.09E-01 | -51.75 | 28.00 | 6.46E-02 |
| cg26283496 | -7.02  | 3.20  | 2.84E-02 | -7.51  | 5.11  | 1.41E-01 | -17.11  | 10.20  | 9.35E-02 | -2.29   | 5.43  | 6.73E-01 | -9.85  | 7.99  | 2.18E-01 |
| cg24592546 | -9.25  | 4.22  | 2.84E-02 | -13.84 | 9.41  | 1.42E-01 | -18.72  | 14.31  | 1.91E-01 | -4.07   | 5.43  | 4.54E-01 | -22.14 | 12.87 | 8.55E-02 |
| cg02655711 | 6.76   | 3.09  | 2.84E-02 | 5.77   | 4.95  | 2.44E-01 | 8.31    | 4.95   | 9.32E-02 | 11.30   | 13.27 | 3.94E-01 | 4.04   | 7.52  | 5.92E-01 |
| cg05361811 | -45.55 | 20.79 | 2.84E-02 | -51.04 | 26.65 | 5.54E-02 | -82.21  | 55.15  | 1.36E-01 | 62.89   | 80.82 | 4.36E-01 | -38.06 | 48.53 | 4.33E-01 |

|            |        |       |          |        |       |          |         |        |          |        |       |          |        |       |          |
|------------|--------|-------|----------|--------|-------|----------|---------|--------|----------|--------|-------|----------|--------|-------|----------|
| cg24432768 | -9.64  | 4.40  | 2.84E-02 | -8.04  | 6.75  | 2.34E-01 | 2.20    | 9.17   | 8.10E-01 | -10.11 | 6.82  | 1.38E-01 | -22.66 | 8.90  | 1.09E-02 |
| cg15512528 | -9.76  | 4.45  | 2.84E-02 | -12.13 | 9.00  | 1.78E-01 | -1.45   | 11.88  | 9.03E-01 | -9.55  | 6.32  | 1.31E-01 | -15.58 | 12.95 | 2.29E-01 |
| cg17123676 | 11.89  | 5.43  | 2.84E-02 | 17.69  | 9.13  | 5.27E-02 | 0.21    | 13.05  | 9.87E-01 | 15.63  | 12.60 | 2.15E-01 | 9.39   | 10.10 | 3.53E-01 |
| cg17967813 | -10.64 | 4.86  | 2.84E-02 | -14.38 | 9.03  | 1.11E-01 | -1.53   | 14.04  | 9.13E-01 | -10.28 | 7.27  | 1.58E-01 | -11.83 | 12.75 | 3.53E-01 |
| cg17051318 | -26.80 | 12.23 | 2.84E-02 | -24.70 | 17.04 | 1.47E-01 | 22.27   | 40.90  | 5.86E-01 | -37.33 | 28.52 | 1.90E-01 | -43.48 | 26.58 | 1.02E-01 |
| cg01374580 | -10.04 | 4.58  | 2.84E-02 | -18.24 | 8.09  | 2.41E-02 | -12.65  | 10.18  | 2.14E-01 | 1.44   | 8.02  | 8.57E-01 | -12.55 | 9.72  | 1.97E-01 |
| cg19409229 | -30.63 | 13.98 | 2.84E-02 | -38.71 | 18.08 | 3.23E-02 | -30.25  | 46.23  | 5.13E-01 | -31.22 | 37.09 | 4.00E-01 | -1.82  | 33.97 | 9.57E-01 |
| cg06510563 | 19.79  | 9.03  | 2.84E-02 | 8.77   | 26.17 | 7.37E-01 | -40.80  | 91.94  | 6.57E-01 | 21.27  | 10.10 | 3.51E-02 | 29.79  | 33.84 | 3.79E-01 |
| cg17809353 | 9.15   | 4.17  | 2.84E-02 | 11.50  | 6.08  | 5.84E-02 | 14.01   | 9.34   | 1.33E-01 | 6.74   | 11.36 | 5.53E-01 | 0.05   | 9.50  | 9.96E-01 |
| cg02361306 | 11.09  | 5.06  | 2.84E-02 | -1.67  | 8.58  | 8.45E-01 | 16.42   | 12.37  | 1.84E-01 | 15.67  | 7.11  | 2.75E-02 | 21.41  | 14.90 | 1.51E-01 |
| cg27607338 | 21.51  | 9.82  | 2.84E-02 | 13.92  | 25.15 | 5.80E-01 | -5.93   | 95.05  | 9.50E-01 | 20.25  | 11.25 | 7.19E-02 | 53.33  | 35.66 | 1.35E-01 |
| cg23729020 | 28.62  | 13.06 | 2.84E-02 | 19.04  | 16.19 | 2.39E-01 | -42.76  | 72.84  | 5.57E-01 | 67.18  | 37.17 | 7.07E-02 | 48.10  | 29.69 | 1.05E-01 |
| cg18877699 | 11.80  | 5.39  | 2.84E-02 | 8.70   | 8.62  | 3.13E-01 | 26.27   | 10.84  | 1.54E-02 | 9.00   | 16.37 | 5.83E-01 | 3.72   | 10.68 | 7.28E-01 |
| cg05408284 | 20.55  | 9.38  | 2.84E-02 | 19.47  | 12.50 | 1.19E-01 | 33.38   | 23.76  | 1.60E-01 | 52.50  | 33.22 | 1.14E-01 | 1.03   | 20.90 | 9.61E-01 |
| cg25820479 | -10.07 | 4.60  | 2.84E-02 | -5.71  | 6.44  | 3.75E-01 | -15.40  | 11.90  | 1.96E-01 | -8.36  | 16.21 | 6.06E-01 | -16.08 | 8.99  | 7.39E-02 |
| cg23898951 | -14.01 | 6.39  | 2.84E-02 | -9.59  | 15.61 | 5.39E-01 | -5.42   | 19.85  | 7.85E-01 | -16.80 | 7.85  | 3.23E-02 | -10.67 | 25.05 | 6.70E-01 |
| cg05599825 | -37.03 | 16.90 | 2.84E-02 | -38.99 | 21.91 | 7.51E-02 | 58.82   | 92.50  | 5.25E-01 | -9.15  | 46.76 | 8.45E-01 | -60.55 | 34.41 | 7.85E-02 |
| cg11793978 | -24.15 | 11.02 | 2.84E-02 | -31.00 | 16.60 | 6.18E-02 | 11.25   | 30.37  | 7.11E-01 | -39.62 | 22.17 | 7.40E-02 | -12.08 | 25.94 | 6.41E-01 |
| cg23838245 | 12.69  | 5.79  | 2.84E-02 | 12.32  | 8.01  | 1.24E-01 | 4.64    | 14.46  | 7.48E-01 | 27.28  | 20.21 | 1.77E-01 | 13.90  | 11.93 | 2.44E-01 |
| cg02153490 | -7.09  | 3.23  | 2.84E-02 | -3.04  | 4.63  | 5.11E-01 | -10.46  | 9.26   | 2.58E-01 | -6.77  | 9.04  | 4.54E-01 | -13.21 | 6.32  | 3.66E-02 |
| cg10444491 | -6.87  | 3.14  | 2.84E-02 | -7.51  | 4.20  | 7.34E-02 | -5.41   | 7.45   | 4.67E-01 | -24.58 | 12.61 | 5.13E-02 | -0.95  | 6.99  | 8.92E-01 |
| cg07404961 | -15.75 | 7.19  | 2.84E-02 | -19.01 | 14.14 | 1.79E-01 | -39.35  | 16.05  | 1.42E-02 | -11.49 | 9.73  | 2.38E-01 | 0.46   | 15.12 | 9.76E-01 |
| cg00460795 | 20.67  | 9.43  | 2.84E-02 | 16.34  | 18.27 | 3.71E-01 | 24.40   | 19.52  | 2.11E-01 | 8.45   | 15.04 | 5.74E-01 | 61.31  | 26.85 | 2.24E-02 |
| cg25126678 | 18.68  | 8.53  | 2.84E-02 | 46.71  | 27.10 | 8.48E-02 | 12.77   | 89.37  | 8.86E-01 | 14.15  | 9.24  | 1.26E-01 | 46.94  | 42.40 | 2.68E-01 |
| cg14474898 | -30.54 | 13.94 | 2.84E-02 | -49.01 | 34.31 | 1.53E-01 | -129.28 | 123.27 | 2.94E-01 | -19.06 | 16.45 | 2.47E-01 | -68.40 | 43.22 | 1.13E-01 |
| cg03937687 | 21.26  | 9.70  | 2.84E-02 | 9.95   | 15.98 | 5.33E-01 | 11.77   | 22.62  | 6.03E-01 | 24.93  | 18.61 | 1.80E-01 | 49.28  | 23.16 | 3.34E-02 |
| cg07402396 | -17.43 | 7.96  | 2.84E-02 | -34.38 | 14.94 | 2.14E-02 | -10.60  | 18.11  | 5.59E-01 | -7.94  | 13.24 | 5.49E-01 | -17.07 | 19.72 | 3.87E-01 |
| cg07710335 | -9.21  | 4.21  | 2.85E-02 | -18.99 | 8.33  | 2.26E-02 | -1.78   | 12.39  | 8.86E-01 | -6.45  | 6.15  | 2.95E-01 | -7.10  | 10.43 | 4.96E-01 |
| cg00227490 | 33.81  | 15.43 | 2.85E-02 | 45.33  | 18.24 | 1.30E-02 | 34.91   | 58.59  | 5.51E-01 | -11.36 | 72.07 | 8.75E-01 | -3.13  | 37.51 | 9.34E-01 |
| cg08766812 | -11.10 | 5.07  | 2.85E-02 | -16.57 | 7.29  | 2.30E-02 | -8.34   | 10.48  | 4.26E-01 | -16.86 | 11.08 | 1.28E-01 | 8.40   | 12.90 | 5.15E-01 |
| cg14966716 | 21.36  | 9.75  | 2.85E-02 | 1.16   | 18.91 | 9.51E-01 | 20.23   | 18.90  | 2.84E-01 | 38.25  | 17.27 | 2.68E-02 | 23.32  | 25.24 | 3.55E-01 |
| cg25888881 | 6.42   | 2.93  | 2.85E-02 | 5.83   | 3.81  | 1.26E-01 | 15.39   | 7.85   | 4.99E-02 | 8.42   | 8.55  | 3.25E-01 | -1.14  | 7.56  | 8.80E-01 |
| cg07126163 | -31.70 | 14.47 | 2.85E-02 | -20.73 | 18.15 | 2.53E-01 | -34.51  | 41.84  | 4.10E-01 | 4.29   | 72.97 | 9.53E-01 | -70.96 | 31.94 | 2.63E-02 |
| cg26197220 | -35.20 | 16.07 | 2.85E-02 | -40.39 | 56.17 | 4.72E-01 | 121.35  | 188.98 | 5.21E-01 | -39.70 | 17.64 | 2.44E-02 | 2.16   | 56.39 | 9.69E-01 |
| cg26842089 | -28.54 | 13.03 | 2.85E-02 | -35.00 | 16.06 | 2.93E-02 | 3.32    | 48.00  | 9.45E-01 | 47.38  | 73.03 | 5.16E-01 | -30.68 | 26.80 | 2.52E-01 |

|            |        |       |          |        |       |          |         |        |          |        |       |          |        |       |          |
|------------|--------|-------|----------|--------|-------|----------|---------|--------|----------|--------|-------|----------|--------|-------|----------|
| cg08274234 | 16.24  | 7.41  | 2.85E-02 | 17.96  | 10.83 | 9.74E-02 | 36.24   | 25.79  | 1.60E-01 | 45.01  | 30.47 | 1.40E-01 | 5.57   | 11.87 | 6.39E-01 |
| cg12502785 | 33.43  | 15.26 | 2.85E-02 | 23.34  | 28.82 | 4.18E-01 | -36.84  | 72.56  | 6.12E-01 | 37.78  | 21.10 | 7.33E-02 | 57.44  | 39.10 | 1.42E-01 |
| cg04006565 | 16.61  | 7.58  | 2.85E-02 | 24.14  | 14.63 | 9.89E-02 | -3.06   | 24.41  | 9.00E-01 | 7.60   | 11.42 | 5.06E-01 | 36.47  | 17.23 | 3.43E-02 |
| cg13046608 | 13.67  | 6.24  | 2.85E-02 | 21.29  | 12.17 | 8.04E-02 | 36.78   | 17.22  | 3.27E-02 | 8.55   | 6.88  | 2.14E-01 | -1.93  | 17.99 | 9.14E-01 |
| cg11522145 | -17.64 | 8.05  | 2.85E-02 | -22.28 | 13.98 | 1.11E-01 | -26.66  | 16.36  | 1.03E-01 | 2.30   | 16.84 | 8.91E-01 | -21.88 | 18.13 | 2.27E-01 |
| cg04362907 | 30.83  | 14.08 | 2.85E-02 | -18.66 | 34.15 | 5.85E-01 | 12.95   | 137.30 | 9.25E-01 | 38.76  | 16.63 | 1.98E-02 | 59.07  | 43.78 | 1.77E-01 |
| cg24914848 | -9.88  | 4.51  | 2.85E-02 | -10.51 | 8.52  | 2.17E-01 | 3.30    | 11.99  | 7.83E-01 | -15.70 | 6.81  | 2.12E-02 | -3.72  | 12.10 | 7.58E-01 |
| cg21649258 | 11.25  | 5.14  | 2.85E-02 | 14.31  | 12.51 | 2.53E-01 | 9.91    | 21.20  | 6.40E-01 | 11.85  | 6.94  | 8.76E-02 | 7.84   | 10.83 | 4.69E-01 |
| cg07133445 | -29.76 | 13.58 | 2.85E-02 | -21.51 | 17.89 | 2.29E-01 | -3.09   | 37.61  | 9.34E-01 | -88.32 | 39.90 | 2.68E-02 | -37.93 | 32.30 | 2.40E-01 |
| cg14706739 | 17.96  | 8.20  | 2.85E-02 | 39.16  | 20.41 | 5.51E-02 | 33.36   | 22.48  | 1.38E-01 | 10.54  | 10.49 | 3.15E-01 | 8.04   | 26.75 | 7.64E-01 |
| cg22514863 | -42.45 | 19.38 | 2.85E-02 | -39.35 | 23.31 | 9.14E-02 | -107.26 | 93.00  | 2.49E-01 | 33.85  | 61.84 | 5.84E-01 | -83.32 | 47.43 | 7.90E-02 |
| cg15931168 | 14.11  | 6.44  | 2.85E-02 | 22.26  | 10.26 | 3.01E-02 | 3.13    | 20.11  | 8.77E-01 | 16.21  | 15.56 | 2.98E-01 | 6.75   | 11.19 | 5.47E-01 |
| cg24943066 | -9.38  | 4.28  | 2.85E-02 | -12.41 | 7.04  | 7.81E-02 | -3.62   | 10.12  | 7.20E-01 | -6.00  | 8.31  | 4.71E-01 | -13.75 | 9.95  | 1.67E-01 |
| cg03316474 | 23.68  | 10.81 | 2.85E-02 | 3.01   | 30.35 | 9.21E-01 | -26.01  | 108.63 | 8.11E-01 | 28.73  | 12.18 | 1.83E-02 | 12.06  | 39.44 | 7.60E-01 |
| cg11224946 | -11.92 | 5.44  | 2.85E-02 | -5.60  | 8.84  | 5.26E-01 | -18.95  | 10.42  | 6.91E-02 | -11.10 | 13.48 | 4.10E-01 | -15.28 | 12.68 | 2.28E-01 |
| cg03511282 | -15.66 | 7.15  | 2.85E-02 | -6.97  | 21.24 | 7.43E-01 | 2.59    | 27.71  | 9.26E-01 | -21.60 | 8.27  | 9.01E-03 | 15.10  | 26.49 | 5.69E-01 |
| cg01468579 | -7.32  | 3.34  | 2.85E-02 | -9.99  | 5.58  | 7.34E-02 | -10.97  | 8.06   | 1.73E-01 | -2.76  | 6.00  | 6.45E-01 | -6.25  | 8.40  | 4.57E-01 |
| cg25995460 | 13.78  | 6.29  | 2.85E-02 | 12.61  | 9.59  | 1.89E-01 | 37.63   | 13.10  | 4.07E-03 | 4.41   | 5.67  | 4.36E-01 | 13.63  | 10.54 | 1.96E-01 |
| cg26406074 | 13.02  | 5.95  | 2.85E-02 | 13.82  | 8.34  | 9.77E-02 | -0.19   | 13.31  | 9.89E-01 | 31.59  | 24.26 | 1.93E-01 | 17.80  | 12.32 | 1.49E-01 |
| cg27513684 | 8.32   | 3.80  | 2.85E-02 | 6.40   | 5.10  | 2.10E-01 | 17.41   | 8.83   | 4.86E-02 | 15.43  | 11.01 | 1.61E-01 | -1.99  | 10.07 | 8.44E-01 |
| cg12491659 | 8.00   | 3.65  | 2.85E-02 | 7.60   | 4.95  | 1.25E-01 | 17.23   | 9.39   | 6.66E-02 | 7.92   | 11.37 | 4.86E-01 | 2.18   | 8.16  | 7.89E-01 |
| cg10560079 | -5.97  | 2.73  | 2.85E-02 | -9.84  | 4.09  | 1.63E-02 | -3.48   | 11.07  | 7.53E-01 | -3.51  | 4.42  | 4.28E-01 | -0.56  | 7.99  | 9.44E-01 |
| cg05431334 | -26.72 | 12.20 | 2.86E-02 | -21.12 | 17.28 | 2.22E-01 | 2.02    | 40.91  | 9.61E-01 | -47.14 | 24.18 | 5.13E-02 | -27.68 | 30.74 | 3.68E-01 |
| cg22458831 | 19.06  | 8.70  | 2.86E-02 | 36.62  | 18.52 | 4.80E-02 | -5.09   | 20.44  | 8.04E-01 | 21.28  | 12.66 | 9.28E-02 | 14.65  | 24.65 | 5.52E-01 |
| cg04486886 | 17.59  | 8.03  | 2.86E-02 | 23.20  | 10.99 | 3.48E-02 | 23.81   | 21.89  | 2.77E-01 | 24.48  | 26.13 | 3.49E-01 | -1.39  | 16.53 | 9.33E-01 |
| cg06841783 | -18.50 | 8.45  | 2.86E-02 | -24.64 | 15.23 | 1.06E-01 | -1.20   | 13.83  | 9.31E-01 | -32.56 | 10.54 | 2.01E-03 | -0.84  | 22.53 | 9.70E-01 |
| cg20456243 | -10.68 | 4.88  | 2.86E-02 | -13.62 | 7.54  | 7.08E-02 | -2.99   | 12.58  | 8.12E-01 | -10.66 | 9.79  | 2.76E-01 | -10.31 | 11.44 | 3.67E-01 |
| cg11801727 | -4.37  | 2.00  | 2.86E-02 | -2.28  | 2.77  | 4.12E-01 | -6.58   | 3.97   | 9.74E-02 | -6.77  | 9.38  | 4.71E-01 | -6.62  | 4.64  | 1.54E-01 |
| cg02347989 | 20.52  | 9.37  | 2.86E-02 | 29.61  | 13.44 | 2.76E-02 | -3.71   | 16.10  | 8.18E-01 | 20.27  | 19.50 | 2.99E-01 | 41.15  | 21.75 | 5.86E-02 |
| cg00661523 | 11.38  | 5.20  | 2.86E-02 | 14.65  | 6.88  | 3.33E-02 | 4.44    | 13.63  | 7.45E-01 | 1.13   | 19.43 | 9.53E-01 | 10.79  | 11.24 | 3.37E-01 |
| cg11596397 | -31.93 | 14.58 | 2.86E-02 | -37.18 | 18.64 | 4.62E-02 | 2.43    | 52.77  | 9.63E-01 | -19.92 | 64.68 | 7.58E-01 | -32.02 | 28.54 | 2.62E-01 |
| cg13272644 | 16.17  | 7.39  | 2.86E-02 | 30.08  | 12.94 | 2.00E-02 | 2.64    | 25.30  | 9.17E-01 | 11.09  | 12.11 | 3.60E-01 | 9.28   | 15.87 | 5.59E-01 |
| cg14478368 | -9.37  | 4.28  | 2.86E-02 | -11.60 | 8.68  | 1.82E-01 | -16.75  | 12.46  | 1.79E-01 | -2.05  | 6.32  | 7.45E-01 | -20.10 | 10.07 | 4.59E-02 |
| cg06822193 | -10.70 | 4.89  | 2.86E-02 | -11.70 | 8.79  | 1.83E-01 | 1.95    | 11.83  | 8.69E-01 | -13.15 | 8.66  | 1.29E-01 | -15.96 | 10.87 | 1.42E-01 |
| cg27312530 | -13.66 | 6.24  | 2.86E-02 | -15.30 | 20.32 | 4.51E-01 | -1.97   | 26.77  | 9.41E-01 | -14.67 | 6.97  | 3.52E-02 | -6.96  | 27.93 | 8.03E-01 |

|            |        |       |          |         |       |          |         |        |          |        |        |          |        |       |          |
|------------|--------|-------|----------|---------|-------|----------|---------|--------|----------|--------|--------|----------|--------|-------|----------|
| cg21980394 | -8.41  | 3.84  | 2.86E-02 | -5.99   | 5.51  | 2.77E-01 | -10.34  | 9.00   | 2.50E-01 | -5.62  | 12.08  | 6.42E-01 | -13.23 | 8.01  | 9.88E-02 |
| cg00578032 | 13.88  | 6.34  | 2.86E-02 | 27.79   | 11.69 | 1.74E-02 | 3.06    | 20.77  | 8.83E-01 | 13.87  | 10.81  | 1.99E-01 | 2.41   | 12.22 | 8.44E-01 |
| cg14235723 | -33.50 | 15.30 | 2.86E-02 | -18.49  | 37.86 | 6.25E-01 | -49.28  | 222.27 | 8.25E-01 | -32.71 | 17.80  | 6.61E-02 | -65.36 | 50.19 | 1.93E-01 |
| cg27615432 | 32.70  | 14.94 | 2.86E-02 | 32.19   | 30.78 | 2.96E-01 | 41.42   | 126.02 | 7.42E-01 | 26.23  | 18.19  | 1.49E-01 | 90.46  | 54.33 | 9.59E-02 |
| cg10100318 | 17.36  | 7.93  | 2.86E-02 | 17.46   | 20.02 | 3.83E-01 | 6.69    | 52.63  | 8.99E-01 | 16.55  | 9.17   | 7.12E-02 | 28.72  | 29.33 | 3.28E-01 |
| cg26669876 | -59.31 | 27.09 | 2.86E-02 | -82.21  | 33.27 | 1.35E-02 | -37.07  | 173.11 | 8.30E-01 | 7.98   | 100.48 | 9.37E-01 | -18.68 | 55.33 | 7.36E-01 |
| cg13780614 | 20.60  | 9.41  | 2.86E-02 | 31.46   | 15.21 | 3.86E-02 | 21.81   | 53.24  | 6.82E-01 | 5.74   | 13.48  | 6.70E-01 | 51.56  | 29.97 | 8.54E-02 |
| cg08349108 | 4.57   | 2.09  | 2.86E-02 | 3.50    | 3.26  | 2.82E-01 | 3.82    | 4.63   | 4.10E-01 | 4.63   | 4.08   | 2.57E-01 | 9.25   | 5.95  | 1.20E-01 |
| cg18947016 | 17.15  | 7.83  | 2.86E-02 | 14.71   | 14.87 | 3.22E-01 | 27.66   | 17.79  | 1.20E-01 | 14.18  | 13.13  | 2.80E-01 | 15.37  | 18.85 | 4.15E-01 |
| cg25053484 | 49.06  | 22.41 | 2.86E-02 | 52.13   | 28.83 | 7.06E-02 | 114.70  | 110.28 | 2.98E-01 | 61.24  | 59.61  | 3.04E-01 | 19.54  | 48.58 | 6.87E-01 |
| cg10016358 | 16.04  | 7.33  | 2.86E-02 | 18.44   | 10.56 | 8.09E-02 | 26.42   | 17.01  | 1.20E-01 | 8.16   | 17.30  | 6.37E-01 | 5.19   | 18.70 | 7.81E-01 |
| cg07052737 | 5.80   | 2.65  | 2.86E-02 | 4.21    | 3.41  | 2.18E-01 | 11.08   | 5.95   | 6.27E-02 | 9.02   | 8.43   | 2.85E-01 | 1.77   | 8.29  | 8.31E-01 |
| cg10705570 | -6.96  | 3.18  | 2.86E-02 | -7.85   | 5.27  | 1.37E-01 | 6.85    | 9.53   | 4.73E-01 | -8.59  | 4.81   | 7.37E-02 | -12.55 | 10.69 | 2.40E-01 |
| cg12790424 | -11.00 | 5.02  | 2.86E-02 | -15.55  | 9.48  | 1.01E-01 | -1.04   | 11.57  | 9.28E-01 | -11.18 | 8.67   | 1.97E-01 | -13.74 | 11.36 | 2.27E-01 |
| cg16273979 | -10.18 | 4.65  | 2.86E-02 | -16.28  | 8.69  | 6.11E-02 | -8.44   | 9.31   | 3.65E-01 | -8.98  | 9.08   | 3.23E-01 | -5.24  | 10.35 | 6.13E-01 |
| cg01402631 | -11.13 | 5.09  | 2.86E-02 | -10.46  | 9.51  | 2.72E-01 | -1.12   | 12.68  | 9.30E-01 | -14.25 | 7.42   | 5.48E-02 | -15.26 | 17.67 | 3.88E-01 |
| cg00559054 | -42.50 | 19.42 | 2.86E-02 | -104.83 | 46.81 | 2.51E-02 | -220.34 | 196.53 | 2.62E-01 | -29.65 | 18.67  | 1.12E-01 | -16.99 | 65.50 | 7.95E-01 |
| cg10838469 | 20.52  | 9.37  | 2.86E-02 | 30.18   | 16.91 | 7.42E-02 | 14.57   | 17.43  | 4.03E-01 | 24.79  | 19.00  | 1.92E-01 | 6.20   | 23.43 | 7.91E-01 |
| cg12152540 | -8.25  | 3.77  | 2.86E-02 | -2.77   | 6.90  | 6.88E-01 | -8.51   | 12.48  | 4.95E-01 | -11.21 | 5.45   | 3.97E-02 | -9.76  | 10.39 | 3.48E-01 |
| cg14456800 | 13.33  | 6.09  | 2.86E-02 | 6.71    | 10.68 | 5.30E-01 | 11.31   | 11.93  | 3.43E-01 | 9.86   | 7.59   | 1.94E-01 | 43.19  | 16.73 | 9.82E-03 |
| cg17423597 | 7.42   | 3.39  | 2.86E-02 | 11.34   | 7.44  | 1.28E-01 | -12.29  | 12.78  | 3.36E-01 | 9.11   | 4.33   | 3.53E-02 | 3.17   | 10.29 | 7.58E-01 |
| cg04686354 | 5.66   | 2.58  | 2.86E-02 | 4.84    | 3.01  | 1.08E-01 | 12.79   | 6.93   | 6.50E-02 | 2.74   | 11.05  | 8.04E-01 | 2.32   | 9.79  | 8.13E-01 |
| cg19350747 | 19.79  | 9.04  | 2.86E-02 | 23.69   | 15.85 | 1.35E-01 | 28.52   | 18.73  | 1.28E-01 | 13.90  | 18.03  | 4.41E-01 | 10.21  | 20.78 | 6.23E-01 |
| cg22147660 | 11.61  | 5.31  | 2.86E-02 | 21.43   | 10.18 | 3.53E-02 | 3.70    | 16.51  | 8.23E-01 | 12.08  | 8.96   | 1.77E-01 | 4.26   | 10.13 | 6.74E-01 |
| cg20924825 | -12.53 | 5.73  | 2.87E-02 | -14.06  | 9.45  | 1.37E-01 | -9.59   | 13.09  | 4.64E-01 | -14.61 | 14.15  | 3.02E-01 | -11.31 | 10.88 | 2.98E-01 |
| cg12786945 | 23.64  | 10.80 | 2.87E-02 | 66.53   | 41.50 | 1.09E-01 | -137.74 | 169.45 | 4.16E-01 | 18.46  | 11.69  | 1.15E-01 | 52.75  | 39.52 | 1.82E-01 |
| cg11922563 | 6.19   | 2.83  | 2.87E-02 | 1.51    | 2.97  | 6.13E-01 | 11.42   | 5.37   | 3.35E-02 | 10.87  | 4.17   | 9.19E-03 | 2.89   | 6.36  | 6.49E-01 |
| cg14101687 | -12.88 | 5.88  | 2.87E-02 | -4.52   | 13.71 | 7.42E-01 | -21.46  | 32.03  | 5.03E-01 | -12.83 | 6.99   | 6.67E-02 | -30.22 | 21.62 | 1.62E-01 |
| cg18607418 | -28.72 | 13.13 | 2.87E-02 | -40.11  | 15.58 | 1.01E-02 | -44.43  | 81.59  | 5.86E-01 | 0.98   | 47.80  | 9.84E-01 | 4.29   | 30.17 | 8.87E-01 |
| cg15854847 | 16.08  | 7.35  | 2.87E-02 | 24.39   | 15.16 | 1.08E-01 | 3.34    | 22.25  | 8.81E-01 | 16.77  | 10.81  | 1.21E-01 | 11.55  | 16.69 | 4.89E-01 |
| cg26169845 | 23.16  | 10.59 | 2.87E-02 | 20.34   | 13.88 | 1.43E-01 | 44.09   | 24.11  | 6.75E-02 | 16.45  | 44.27  | 7.10E-01 | 11.23  | 25.77 | 6.63E-01 |
| cg03438742 | 32.55  | 14.88 | 2.87E-02 | 31.22   | 18.75 | 9.60E-02 | 5.50    | 42.76  | 8.98E-01 | 71.15  | 54.78  | 1.94E-01 | 39.72  | 35.47 | 2.63E-01 |
| cg22053945 | 8.72   | 3.99  | 2.87E-02 | 11.95   | 6.84  | 8.06E-02 | 19.25   | 12.95  | 1.37E-01 | 9.50   | 4.95   | 5.47E-02 | -7.62  | 10.33 | 4.61E-01 |
| cg20185718 | 19.54  | 8.93  | 2.87E-02 | 14.55   | 12.12 | 2.30E-01 | 38.45   | 14.49  | 7.94E-03 | 25.91  | 16.04  | 1.06E-01 | -9.22  | 19.66 | 6.39E-01 |
| cg20893031 | 13.81  | 6.31  | 2.87E-02 | 14.56   | 8.69  | 9.39E-02 | 4.94    | 19.30  | 7.98E-01 | 2.97   | 41.01  | 9.42E-01 | 16.20  | 10.81 | 1.34E-01 |

|            |        |       |          |        |       |          |         |        |          |        |       |          |         |       |          |
|------------|--------|-------|----------|--------|-------|----------|---------|--------|----------|--------|-------|----------|---------|-------|----------|
| cg07651048 | 18.61  | 8.51  | 2.87E-02 | 10.24  | 14.32 | 4.75E-01 | 34.54   | 17.62  | 4.99E-02 | 3.99   | 17.43 | 8.19E-01 | 34.17   | 20.31 | 9.25E-02 |
| cg09563325 | -10.33 | 4.72  | 2.87E-02 | -15.90 | 7.80  | 4.16E-02 | -3.57   | 11.00  | 7.46E-01 | -2.19  | 9.11  | 8.10E-01 | -18.01  | 11.09 | 1.05E-01 |
| cg16644764 | 21.42  | 9.79  | 2.87E-02 | -12.27 | 32.86 | 7.09E-01 | 98.97   | 116.97 | 3.97E-01 | 26.03  | 10.63 | 1.43E-02 | -4.89   | 41.48 | 9.06E-01 |
| cg20449648 | 15.69  | 7.17  | 2.87E-02 | 0.68   | 18.66 | 9.71E-01 | 55.45   | 32.08  | 8.39E-02 | 17.38  | 8.54  | 4.17E-02 | 5.68    | 23.14 | 8.06E-01 |
| cg18406000 | -4.98  | 2.28  | 2.87E-02 | -5.40  | 3.62  | 1.35E-01 | 0.50    | 5.68   | 9.30E-01 | -3.35  | 4.48  | 4.55E-01 | -11.16  | 5.30  | 3.55E-02 |
| cg01027532 | -20.57 | 9.40  | 2.87E-02 | -43.06 | 16.64 | 9.65E-03 | -12.28  | 19.70  | 5.33E-01 | -2.15  | 17.15 | 9.00E-01 | -21.96  | 20.57 | 2.86E-01 |
| cg10851715 | -14.99 | 6.85  | 2.87E-02 | -22.30 | 12.80 | 8.16E-02 | -5.75   | 17.84  | 7.47E-01 | -13.94 | 10.08 | 1.67E-01 | -12.65  | 21.22 | 5.51E-01 |
| cg21450784 | -7.05  | 3.22  | 2.87E-02 | -7.82  | 4.36  | 7.27E-02 | -0.24   | 7.15   | 9.74E-01 | -13.07 | 9.73  | 1.79E-01 | -9.22   | 8.61  | 2.84E-01 |
| cg04298953 | 13.15  | 6.01  | 2.87E-02 | 19.42  | 9.77  | 4.69E-02 | 26.50   | 17.12  | 1.22E-01 | 10.43  | 12.78 | 4.14E-01 | 0.80    | 11.43 | 9.44E-01 |
| cg03716590 | -11.83 | 5.41  | 2.87E-02 | -3.96  | 11.15 | 7.23E-01 | -11.08  | 15.56  | 4.76E-01 | -12.91 | 7.53  | 8.63E-02 | -22.73  | 15.16 | 1.34E-01 |
| cg18614510 | 8.31   | 3.80  | 2.87E-02 | 9.84   | 5.14  | 5.53E-02 | 12.13   | 10.11  | 2.30E-01 | 7.78   | 9.34  | 4.05E-01 | -0.48   | 9.91  | 9.62E-01 |
| cg10567706 | -7.57  | 3.46  | 2.87E-02 | -9.59  | 4.97  | 5.37E-02 | -6.43   | 8.71   | 4.60E-01 | -20.16 | 14.53 | 1.65E-01 | -2.54   | 6.31  | 6.88E-01 |
| cg00926657 | 9.98   | 4.56  | 2.87E-02 | 9.24   | 6.08  | 1.29E-01 | 17.48   | 8.14   | 3.17E-02 | 18.78  | 13.31 | 1.58E-01 | -4.86   | 10.22 | 6.35E-01 |
| cg11259591 | 15.34  | 7.01  | 2.87E-02 | 17.51  | 14.46 | 2.26E-01 | 6.02    | 21.62  | 7.81E-01 | 18.35  | 9.61  | 5.63E-02 | 6.48    | 19.61 | 7.41E-01 |
| cg16018972 | 53.61  | 24.51 | 2.87E-02 | 33.03  | 34.04 | 3.32E-01 | 88.49   | 112.03 | 4.30E-01 | 70.68  | 62.68 | 2.59E-01 | 76.36   | 46.25 | 9.87E-02 |
| cg00335124 | 6.53   | 2.99  | 2.87E-02 | 4.97   | 3.92  | 2.05E-01 | 7.35    | 7.02   | 2.95E-01 | 15.66  | 10.95 | 1.53E-01 | 7.06    | 7.41  | 3.41E-01 |
| cg16619935 | 18.78  | 8.59  | 2.87E-02 | 33.61  | 18.92 | 7.56E-02 | 25.22   | 20.84  | 2.26E-01 | 6.66   | 9.57  | 4.86E-01 | 46.01   | 25.23 | 6.82E-02 |
| cg01400750 | 5.06   | 2.31  | 2.87E-02 | 6.27   | 3.14  | 4.59E-02 | 11.39   | 6.41   | 7.57E-02 | 2.30   | 5.29  | 6.64E-01 | -1.92   | 6.26  | 7.59E-01 |
| cg08906442 | 26.73  | 12.22 | 2.87E-02 | 35.50  | 17.49 | 4.24E-02 | -5.98   | 27.13  | 8.25E-01 | 41.65  | 39.52 | 2.92E-01 | 31.08   | 26.47 | 2.40E-01 |
| cg01109256 | -8.90  | 4.07  | 2.87E-02 | -10.11 | 5.74  | 7.84E-02 | -8.71   | 9.55   | 3.62E-01 | -16.14 | 18.13 | 3.73E-01 | -5.39   | 7.91  | 4.96E-01 |
| cg25805739 | -28.23 | 12.91 | 2.87E-02 | -74.34 | 46.76 | 1.12E-01 | 157.12  | 164.48 | 3.39E-01 | -26.08 | 14.29 | 6.81E-02 | -22.21  | 40.48 | 5.83E-01 |
| cg26104143 | 13.19  | 6.03  | 2.87E-02 | 10.17  | 19.62 | 6.04E-01 | -45.20  | 99.92  | 6.51E-01 | 14.74  | 6.51  | 2.36E-02 | -5.58   | 28.67 | 8.46E-01 |
| cg07415388 | 19.61  | 8.97  | 2.87E-02 | 17.72  | 15.50 | 2.53E-01 | 22.59   | 18.06  | 2.11E-01 | 17.00  | 16.64 | 3.07E-01 | 24.70   | 25.00 | 3.23E-01 |
| cg19889626 | 11.69  | 5.35  | 2.87E-02 | 4.60   | 12.08 | 7.03E-01 | 10.24   | 16.54  | 5.36E-01 | 12.89  | 7.87  | 1.01E-01 | 15.82   | 10.94 | 1.48E-01 |
| cg25303462 | 15.50  | 7.09  | 2.87E-02 | 26.70  | 9.45  | 4.73E-03 | 27.56   | 19.75  | 1.63E-01 | 1.31   | 8.53  | 8.78E-01 | 16.34   | 13.15 | 2.14E-01 |
| cg00980649 | 7.66   | 3.50  | 2.87E-02 | 10.26  | 4.77  | 3.15E-02 | 11.96   | 7.69   | 1.20E-01 | -4.68  | 11.86 | 6.93E-01 | 0.31    | 8.61  | 9.71E-01 |
| cg12573871 | -7.51  | 3.44  | 2.87E-02 | -2.16  | 8.09  | 7.90E-01 | -10.50  | 14.55  | 4.71E-01 | -9.15  | 4.29  | 3.31E-02 | -5.50   | 9.79  | 5.74E-01 |
| cg14929757 | -60.89 | 27.84 | 2.87E-02 | -79.14 | 44.13 | 7.30E-02 | -172.52 | 181.38 | 3.42E-01 | -24.29 | 13.13 | 6.44E-02 | -119.15 | 48.46 | 1.39E-02 |
| cg09938408 | -42.05 | 19.23 | 2.87E-02 | -10.33 | 32.46 | 7.50E-01 | -83.54  | 51.13  | 1.02E-01 | -39.83 | 33.63 | 2.36E-01 | -75.21  | 45.24 | 9.65E-02 |
| cg20463894 | 14.12  | 6.45  | 2.88E-02 | 12.80  | 9.53  | 1.79E-01 | 25.86   | 14.72  | 7.90E-02 | 2.90   | 16.46 | 8.60E-01 | 14.48   | 14.60 | 3.22E-01 |
| cg03182218 | -45.97 | 21.02 | 2.88E-02 | -66.58 | 33.51 | 4.70E-02 | 6.95    | 53.11  | 8.96E-01 | -63.46 | 50.05 | 2.05E-01 | -35.36  | 40.20 | 3.79E-01 |
| cg09029538 | 13.02  | 5.95  | 2.88E-02 | 21.33  | 11.08 | 5.42E-02 | 17.22   | 13.60  | 2.06E-01 | 0.67   | 9.20  | 9.42E-01 | 25.59   | 15.63 | 1.02E-01 |
| cg24339597 | -22.03 | 10.07 | 2.88E-02 | -45.68 | 17.81 | 1.03E-02 | -44.54  | 28.41  | 1.17E-01 | -9.81  | 7.34  | 1.81E-01 | -13.62  | 22.39 | 5.43E-01 |
| cg11351475 | 33.71  | 15.41 | 2.88E-02 | 75.08  | 38.29 | 4.99E-02 | -80.73  | 119.30 | 4.99E-01 | 27.41  | 18.13 | 1.31E-01 | 31.18   | 49.10 | 5.25E-01 |
| cg24996270 | 28.24  | 12.92 | 2.88E-02 | 45.05  | 27.78 | 1.05E-01 | 220.08  | 117.07 | 6.01E-02 | 24.51  | 10.44 | 1.90E-02 | 7.52    | 32.48 | 8.17E-01 |

|            |        |       |          |        |       |          |         |        |          |        |       |          |         |       |          |
|------------|--------|-------|----------|--------|-------|----------|---------|--------|----------|--------|-------|----------|---------|-------|----------|
| cg24704476 | 12.09  | 5.53  | 2.88E-02 | 15.43  | 8.40  | 6.64E-02 | 6.06    | 14.21  | 6.70E-01 | 17.60  | 14.25 | 2.17E-01 | 6.95    | 10.74 | 5.17E-01 |
| cg12595026 | 33.51  | 15.32 | 2.88E-02 | 32.69  | 20.99 | 1.19E-01 | 50.53   | 40.52  | 2.12E-01 | 48.76  | 43.69 | 2.64E-01 | 14.23   | 34.19 | 6.77E-01 |
| cg09636163 | -10.86 | 4.96  | 2.88E-02 | -15.88 | 7.43  | 3.24E-02 | -7.87   | 11.32  | 4.87E-01 | 10.93  | 14.32 | 4.45E-01 | -14.80  | 10.12 | 1.44E-01 |
| cg12763978 | -4.16  | 1.90  | 2.88E-02 | -5.24  | 3.18  | 9.95E-02 | -3.31   | 4.75   | 4.86E-01 | -5.33  | 3.36  | 1.13E-01 | -0.29   | 4.75  | 9.52E-01 |
| cg10740660 | 10.83  | 4.95  | 2.88E-02 | 10.78  | 6.52  | 9.80E-02 | 9.02    | 12.86  | 4.83E-01 | 17.59  | 15.84 | 2.67E-01 | 8.74    | 11.78 | 4.58E-01 |
| cg04611159 | 22.91  | 10.48 | 2.88E-02 | 10.75  | 17.28 | 5.34E-01 | 5.97    | 15.65  | 7.03E-01 | 26.04  | 14.60 | 7.45E-02 | 58.70   | 20.85 | 4.88E-03 |
| cg12811871 | -5.97  | 2.73  | 2.88E-02 | -5.96  | 3.41  | 8.04E-02 | -11.55  | 7.55   | 1.26E-01 | 3.27   | 10.26 | 7.50E-01 | -5.51   | 6.88  | 4.23E-01 |
| cg05166871 | 8.40   | 3.84  | 2.88E-02 | 10.85  | 5.30  | 4.08E-02 | 11.98   | 9.29   | 1.97E-01 | 6.78   | 9.82  | 4.90E-01 | -2.52   | 9.88  | 7.99E-01 |
| cg16983627 | 21.23  | 9.71  | 2.88E-02 | 27.99  | 19.23 | 1.46E-01 | 16.01   | 43.33  | 7.12E-01 | 14.54  | 12.76 | 2.54E-01 | 42.13   | 28.56 | 1.40E-01 |
| cg07109551 | -11.70 | 5.35  | 2.88E-02 | -17.25 | 7.95  | 3.00E-02 | -11.26  | 11.64  | 3.33E-01 | 2.82   | 16.11 | 8.61E-01 | -8.07   | 11.29 | 4.75E-01 |
| cg16353615 | 6.71   | 3.07  | 2.88E-02 | 6.96   | 4.91  | 1.56E-01 | 7.76    | 6.90   | 2.61E-01 | 5.85   | 5.66  | 3.02E-01 | 6.30    | 9.00  | 4.84E-01 |
| cg12393318 | 17.07  | 7.81  | 2.88E-02 | 29.54  | 17.02 | 8.27E-02 | 21.68   | 20.17  | 2.82E-01 | 22.39  | 13.16 | 8.89E-02 | -0.94   | 14.55 | 9.48E-01 |
| cg02989080 | -11.86 | 5.43  | 2.88E-02 | -26.14 | 11.09 | 1.84E-02 | -10.98  | 16.21  | 4.98E-01 | -8.61  | 7.47  | 2.49E-01 | 1.36    | 15.59 | 9.30E-01 |
| cg09904358 | -8.59  | 3.93  | 2.88E-02 | -3.98  | 10.33 | 7.00E-01 | 1.22    | 16.64  | 9.42E-01 | -9.92  | 4.67  | 3.35E-02 | -11.55  | 13.04 | 3.76E-01 |
| cg20691428 | -45.94 | 21.01 | 2.88E-02 | -67.62 | 29.36 | 2.13E-02 | -27.99  | 64.00  | 6.62E-01 | -30.13 | 44.17 | 4.95E-01 | -9.51   | 53.63 | 8.59E-01 |
| cg16606638 | 12.63  | 5.78  | 2.88E-02 | 16.06  | 9.11  | 7.78E-02 | 20.64   | 14.81  | 1.63E-01 | 15.84  | 14.40 | 2.71E-01 | 1.66    | 10.83 | 8.78E-01 |
| cg20759486 | -13.73 | 6.28  | 2.88E-02 | -6.03  | 9.80  | 5.38E-01 | -28.29  | 13.06  | 3.04E-02 | -13.93 | 20.48 | 4.97E-01 | -12.88  | 12.21 | 2.91E-01 |
| cg21607172 | 10.74  | 4.91  | 2.88E-02 | 11.29  | 6.39  | 7.75E-02 | 22.71   | 9.78   | 2.02E-02 | -5.81  | 12.61 | 6.45E-01 | 6.85    | 11.83 | 5.63E-01 |
| cg21425003 | -48.48 | 22.17 | 2.88E-02 | -58.80 | 29.94 | 4.95E-02 | -20.07  | 91.36  | 8.26E-01 | -80.33 | 66.32 | 2.26E-01 | -21.57  | 41.85 | 6.06E-01 |
| cg02664157 | 27.58  | 12.61 | 2.88E-02 | 64.33  | 35.40 | 6.92E-02 | -63.56  | 149.41 | 6.71E-01 | 22.80  | 14.04 | 1.04E-01 | 24.79   | 52.18 | 6.35E-01 |
| cg13826890 | 18.62  | 8.52  | 2.88E-02 | 30.68  | 15.98 | 5.49E-02 | 32.23   | 45.35  | 4.77E-01 | 22.26  | 8.48  | 8.70E-03 | -14.17  | 19.73 | 4.73E-01 |
| cg03532013 | -34.14 | 15.62 | 2.88E-02 | -41.96 | 29.75 | 1.58E-01 | 82.82   | 115.18 | 4.72E-01 | -34.16 | 21.58 | 1.14E-01 | -34.08  | 36.59 | 3.52E-01 |
| cg00491404 | -12.81 | 5.86  | 2.88E-02 | -13.12 | 8.41  | 1.19E-01 | -11.90  | 13.43  | 3.76E-01 | -1.63  | 18.02 | 9.28E-01 | -18.31  | 12.53 | 1.44E-01 |
| cg08259506 | 21.84  | 9.99  | 2.88E-02 | 7.67   | 11.52 | 5.05E-01 | 57.07   | 30.05  | 5.75E-02 | 24.60  | 32.81 | 4.53E-01 | 34.86   | 17.47 | 4.59E-02 |
| cg20061010 | -21.08 | 9.64  | 2.88E-02 | -29.03 | 14.61 | 4.69E-02 | -37.21  | 12.07  | 2.05E-03 | 0.31   | 11.57 | 9.79E-01 | -20.21  | 21.71 | 3.52E-01 |
| cg19329644 | 18.82  | 8.61  | 2.88E-02 | 19.91  | 16.72 | 2.34E-01 | 25.72   | 15.39  | 9.45E-02 | 1.06   | 14.67 | 9.42E-01 | 48.88   | 25.08 | 5.13E-02 |
| cg18601426 | 10.30  | 4.71  | 2.88E-02 | 11.35  | 6.84  | 9.69E-02 | 11.96   | 14.87  | 4.21E-01 | -2.47  | 14.67 | 8.66E-01 | 12.33   | 8.32  | 1.38E-01 |
| cg14098681 | 19.70  | 9.01  | 2.88E-02 | -13.29 | 39.66 | 7.38E-01 | 57.64   | 67.73  | 3.95E-01 | 18.52  | 9.81  | 5.90E-02 | 43.21   | 30.69 | 1.59E-01 |
| cg08891110 | 11.38  | 5.21  | 2.88E-02 | 12.16  | 6.89  | 7.75E-02 | 12.57   | 13.73  | 3.60E-01 | 17.47  | 19.32 | 3.66E-01 | 6.39    | 11.29 | 5.71E-01 |
| cg27287245 | -60.46 | 27.66 | 2.88E-02 | -75.35 | 67.56 | 2.65E-01 | -128.13 | 256.29 | 6.17E-01 | -73.06 | 32.96 | 2.67E-02 | 43.91   | 81.04 | 5.88E-01 |
| cg03607054 | -10.45 | 4.78  | 2.88E-02 | -14.59 | 7.82  | 6.21E-02 | -2.71   | 11.21  | 8.09E-01 | -13.28 | 8.38  | 1.13E-01 | -1.56   | 13.82 | 9.10E-01 |
| cg14652717 | -23.27 | 10.65 | 2.88E-02 | -28.58 | 16.60 | 8.50E-02 | -29.49  | 32.40  | 3.63E-01 | -39.61 | 22.47 | 7.80E-02 | 2.21    | 21.03 | 9.16E-01 |
| cg23210148 | -62.35 | 28.53 | 2.89E-02 | -38.41 | 38.58 | 3.19E-01 | 22.33   | 148.69 | 8.81E-01 | -86.34 | 83.40 | 3.01E-01 | -107.16 | 52.16 | 3.99E-02 |
| cg09390350 | -7.63  | 3.49  | 2.89E-02 | -12.58 | 4.75  | 8.16E-03 | -1.89   | 8.75   | 8.29E-01 | -4.51  | 13.13 | 7.31E-01 | -1.01   | 7.24  | 8.89E-01 |
| cg12422551 | 11.07  | 5.07  | 2.89E-02 | -1.28  | 10.83 | 9.06E-01 | -3.90   | 21.88  | 8.58E-01 | 17.33  | 6.11  | 4.57E-03 | 2.45    | 18.46 | 8.94E-01 |

|            |        |       |          |        |       |          |        |        |          |        |       |          |        |       |          |
|------------|--------|-------|----------|--------|-------|----------|--------|--------|----------|--------|-------|----------|--------|-------|----------|
| cg17959327 | 26.16  | 11.97 | 2.89E-02 | 47.96  | 41.34 | 2.46E-01 | -37.88 | 109.84 | 7.30E-01 | 33.43  | 12.68 | 8.37E-03 | -19.08 | 30.95 | 5.38E-01 |
| cg07268332 | 6.42   | 2.94  | 2.89E-02 | 4.14   | 3.66  | 2.59E-01 | 17.83  | 7.62   | 1.93E-02 | 8.33   | 6.34  | 1.89E-01 | 0.78   | 7.58  | 9.18E-01 |
| cg09444744 | -17.08 | 7.81  | 2.89E-02 | -9.12  | 16.38 | 5.78E-01 | -14.49 | 32.82  | 6.59E-01 | -24.10 | 10.14 | 1.74E-02 | 1.16   | 22.40 | 9.59E-01 |
| cg08773955 | -8.81  | 4.03  | 2.89E-02 | -15.18 | 7.84  | 5.29E-02 | -16.60 | 11.45  | 1.47E-01 | -5.09  | 5.88  | 3.87E-01 | -2.45  | 10.75 | 8.20E-01 |
| cg25075504 | -9.90  | 4.53  | 2.89E-02 | -9.83  | 9.66  | 3.09E-01 | -20.33 | 13.19  | 1.23E-01 | -8.67  | 6.27  | 1.67E-01 | -5.83  | 12.09 | 6.30E-01 |
| cg01763890 | 13.57  | 6.21  | 2.89E-02 | 15.96  | 10.45 | 1.27E-01 | 12.18  | 17.08  | 4.76E-01 | 5.38   | 11.94 | 6.53E-01 | 19.91  | 12.55 | 1.13E-01 |
| cg04794887 | -18.33 | 8.39  | 2.89E-02 | -13.49 | 12.21 | 2.69E-01 | -29.97 | 17.00  | 7.78E-02 | -29.67 | 31.08 | 3.40E-01 | -11.81 | 18.24 | 5.17E-01 |
| cg21515003 | -13.70 | 6.27  | 2.89E-02 | -23.85 | 15.10 | 1.14E-01 | 0.52   | 19.00  | 9.78E-01 | -12.05 | 7.81  | 1.23E-01 | -25.34 | 23.02 | 2.71E-01 |
| cg08833577 | 11.33  | 5.19  | 2.89E-02 | 21.65  | 10.15 | 3.29E-02 | 1.85   | 12.37  | 8.81E-01 | 14.10  | 9.00  | 1.17E-01 | 2.90   | 10.79 | 7.88E-01 |
| cg26094599 | 10.55  | 4.83  | 2.89E-02 | 9.90   | 7.19  | 1.69E-01 | 19.90  | 12.02  | 9.79E-02 | 5.70   | 10.28 | 5.79E-01 | 9.66   | 11.79 | 4.13E-01 |
| cg11123440 | 4.72   | 2.16  | 2.89E-02 | 1.03   | 2.36  | 6.61E-01 | 6.65   | 3.04   | 2.87E-02 | 10.59  | 3.57  | 3.03E-03 | 2.14   | 3.42  | 5.31E-01 |
| cg26492847 | -14.05 | 6.43  | 2.89E-02 | -24.90 | 14.78 | 9.21E-02 | -5.53  | 25.64  | 8.29E-01 | -13.72 | 7.89  | 8.22E-02 | 1.34   | 22.14 | 9.52E-01 |
| cg19254119 | 10.83  | 4.96  | 2.89E-02 | 22.93  | 10.54 | 2.95E-02 | 11.27  | 15.72  | 4.73E-01 | 6.19   | 7.17  | 3.89E-01 | 8.33   | 11.05 | 4.51E-01 |
| cg02407762 | 17.03  | 7.79  | 2.89E-02 | 14.59  | 14.25 | 3.06E-01 | 3.48   | 18.36  | 8.50E-01 | 26.82  | 12.42 | 3.08E-02 | 11.64  | 21.89 | 5.95E-01 |
| cg00431050 | 11.70  | 5.36  | 2.89E-02 | 8.97   | 7.33  | 2.21E-01 | 20.41  | 11.06  | 6.48E-02 | 4.93   | 18.39 | 7.89E-01 | 11.62  | 13.97 | 4.05E-01 |
| cg20445034 | -49.19 | 22.51 | 2.89E-02 | -30.82 | 30.21 | 3.08E-01 | 94.38  | 130.94 | 4.71E-01 | -84.32 | 47.23 | 7.42E-02 | -83.55 | 51.94 | 1.08E-01 |
| cg10203522 | 41.24  | 18.88 | 2.89E-02 | 62.22  | 52.71 | 2.38E-01 | -51.23 | 207.15 | 8.05E-01 | 45.91  | 21.12 | 2.98E-02 | -45.75 | 74.06 | 5.37E-01 |
| cg23047134 | 13.93  | 6.38  | 2.89E-02 | 19.67  | 9.49  | 3.82E-02 | 0.13   | 12.50  | 9.92E-01 | 23.01  | 18.28 | 2.08E-01 | 13.30  | 15.62 | 3.94E-01 |
| cg07121547 | 20.99  | 9.61  | 2.89E-02 | 26.05  | 13.07 | 4.62E-02 | 24.95  | 26.25  | 3.42E-01 | 50.96  | 29.51 | 8.42E-02 | -5.40  | 19.47 | 7.81E-01 |
| cg05295919 | 43.28  | 19.81 | 2.89E-02 | 49.15  | 25.15 | 5.07E-02 | -66.05 | 86.84  | 4.47E-01 | 53.06  | 75.38 | 4.81E-01 | 48.62  | 38.99 | 2.12E-01 |
| cg07252778 | 16.08  | 7.36  | 2.89E-02 | -9.01  | 22.48 | 6.88E-01 | 9.00   | 38.28  | 8.14E-01 | 19.46  | 8.24  | 1.82E-02 | 20.50  | 30.56 | 5.02E-01 |
| cg12076953 | 31.77  | 14.54 | 2.89E-02 | 12.04  | 19.68 | 5.41E-01 | 57.68  | 44.90  | 1.99E-01 | 77.47  | 47.02 | 9.94E-02 | 46.28  | 28.89 | 1.09E-01 |
| cg00558215 | 8.25   | 3.78  | 2.89E-02 | 5.16   | 6.92  | 4.56E-01 | 23.40  | 11.64  | 4.43E-02 | 6.38   | 5.89  | 2.78E-01 | 8.72   | 8.74  | 3.18E-01 |
| cg07625774 | -14.53 | 6.65  | 2.89E-02 | -24.07 | 10.90 | 2.72E-02 | 4.73   | 19.03  | 8.04E-01 | -8.50  | 14.20 | 5.49E-01 | -14.95 | 12.43 | 2.29E-01 |
| cg15514496 | 18.02  | 8.25  | 2.89E-02 | 30.29  | 14.72 | 3.97E-02 | -2.31  | 22.21  | 9.17E-01 | 22.97  | 16.57 | 1.66E-01 | 10.44  | 15.06 | 4.88E-01 |
| cg05584078 | -11.55 | 5.29  | 2.89E-02 | -16.37 | 13.22 | 2.16E-01 | -14.01 | 31.02  | 6.51E-01 | -14.51 | 6.40  | 2.34E-02 | 10.91  | 14.82 | 4.62E-01 |
| cg08832603 | 11.81  | 5.41  | 2.89E-02 | 16.30  | 9.11  | 7.34E-02 | 17.66  | 28.63  | 5.37E-01 | 2.66   | 8.04  | 7.40E-01 | 26.46  | 13.53 | 5.04E-02 |
| cg24851600 | -14.27 | 6.53  | 2.90E-02 | -17.99 | 15.94 | 2.59E-01 | -19.73 | 26.23  | 4.52E-01 | -11.83 | 7.85  | 1.32E-01 | -23.58 | 23.48 | 3.15E-01 |
| cg26270975 | -8.77  | 4.02  | 2.90E-02 | -11.66 | 7.12  | 1.01E-01 | -4.21  | 7.94   | 5.96E-01 | -11.44 | 7.50  | 1.27E-01 | -5.04  | 10.79 | 6.40E-01 |
| cg10547893 | -25.77 | 11.80 | 2.90E-02 | -24.34 | 15.85 | 1.25E-01 | 27.64  | 45.01  | 5.39E-01 | -52.20 | 30.34 | 8.54E-02 | -27.83 | 24.81 | 2.62E-01 |
| cg08553524 | -14.53 | 6.65  | 2.90E-02 | -31.36 | 12.29 | 1.07E-02 | 4.85   | 19.70  | 8.05E-01 | -13.87 | 8.18  | 9.01E-02 | -2.19  | 16.41 | 8.94E-01 |
| cg01408932 | -22.21 | 10.17 | 2.90E-02 | -34.50 | 13.06 | 8.25E-03 | -9.52  | 38.54  | 8.05E-01 | -12.86 | 23.90 | 5.91E-01 | 11.95  | 26.93 | 6.57E-01 |
| cg24938830 | 10.09  | 4.62  | 2.90E-02 | 21.61  | 11.70 | 6.47E-02 | 5.73   | 13.13  | 6.62E-01 | 12.63  | 7.07  | 7.43E-02 | 2.14   | 8.51  | 8.02E-01 |
| cg14913644 | 15.75  | 7.21  | 2.90E-02 | 15.97  | 21.88 | 4.65E-01 | -56.13 | 77.34  | 4.68E-01 | 15.59  | 8.09  | 5.39E-02 | 23.96  | 24.29 | 3.24E-01 |
| cg06786630 | 8.15   | 3.73  | 2.90E-02 | 8.47   | 8.28  | 3.06E-01 | 14.73  | 12.76  | 2.48E-01 | 8.16   | 4.79  | 8.84E-02 | 2.08   | 11.54 | 8.57E-01 |

|            |        |       |          |        |       |          |         |        |          |        |       |          |        |       |          |
|------------|--------|-------|----------|--------|-------|----------|---------|--------|----------|--------|-------|----------|--------|-------|----------|
| cg08363114 | 6.36   | 2.91  | 2.90E-02 | 5.85   | 3.82  | 1.26E-01 | 10.49   | 6.25   | 9.31E-02 | -2.12  | 10.40 | 8.39E-01 | 6.84   | 8.24  | 4.06E-01 |
| cg03012370 | 8.69   | 3.98  | 2.90E-02 | 8.01   | 7.01  | 2.53E-01 | 21.58   | 9.54   | 2.37E-02 | 1.12   | 7.18  | 8.76E-01 | 10.18  | 8.95  | 2.55E-01 |
| cg08443038 | -17.85 | 8.17  | 2.90E-02 | -20.06 | 13.95 | 1.50E-01 | -30.14  | 25.29  | 2.33E-01 | -9.74  | 13.64 | 4.75E-01 | -22.39 | 18.61 | 2.29E-01 |
| cg02525637 | -15.84 | 7.25  | 2.90E-02 | -26.66 | 11.89 | 2.49E-02 | -9.47   | 13.67  | 4.89E-01 | 3.04   | 16.60 | 8.55E-01 | -24.57 | 18.36 | 1.81E-01 |
| cg09996288 | 39.99  | 18.31 | 2.90E-02 | 87.09  | 53.57 | 1.04E-01 | -42.07  | 206.19 | 8.38E-01 | 36.93  | 20.74 | 7.49E-02 | 14.14  | 59.20 | 8.11E-01 |
| cg22152728 | 17.38  | 7.96  | 2.90E-02 | 38.81  | 16.24 | 1.69E-02 | 24.48   | 22.39  | 2.74E-01 | 4.21   | 12.37 | 7.34E-01 | 14.71  | 16.99 | 3.87E-01 |
| cg00705661 | 21.68  | 9.93  | 2.90E-02 | 15.58  | 15.42 | 3.12E-01 | 3.68    | 52.61  | 9.44E-01 | 28.32  | 27.46 | 3.02E-01 | 27.16  | 15.33 | 7.65E-02 |
| cg03421926 | 17.35  | 7.95  | 2.90E-02 | 20.70  | 13.53 | 1.26E-01 | 4.83    | 16.30  | 7.67E-01 | 16.84  | 16.28 | 3.01E-01 | 28.21  | 18.78 | 1.33E-01 |
| cg19266910 | 21.60  | 9.89  | 2.90E-02 | 11.62  | 25.43 | 6.48E-01 | 10.60   | 42.26  | 8.02E-01 | 14.21  | 13.02 | 2.75E-01 | 51.03  | 21.25 | 1.63E-02 |
| cg23343073 | 13.72  | 6.28  | 2.90E-02 | 21.39  | 9.39  | 2.27E-02 | 13.42   | 13.73  | 3.28E-01 | -1.97  | 14.06 | 8.89E-01 | 12.03  | 16.59 | 4.68E-01 |
| cg27657473 | 24.90  | 11.40 | 2.90E-02 | 43.48  | 23.55 | 6.49E-02 | -112.08 | 96.20  | 2.44E-01 | 22.31  | 14.06 | 1.12E-01 | 17.11  | 37.35 | 6.47E-01 |
| cg23306295 | 42.87  | 19.63 | 2.90E-02 | 85.77  | 42.26 | 4.24E-02 | -27.25  | 134.32 | 8.39E-01 | 21.48  | 12.42 | 8.38E-02 | 80.29  | 38.85 | 3.88E-02 |
| cg21307484 | -9.24  | 4.23  | 2.90E-02 | -7.16  | 5.87  | 2.23E-01 | -13.55  | 10.63  | 2.03E-01 | -6.84  | 11.03 | 5.35E-01 | -13.55 | 10.13 | 1.81E-01 |
| cg20279561 | 23.21  | 10.63 | 2.90E-02 | 11.06  | 14.38 | 4.42E-01 | 61.06   | 23.43  | 9.17E-03 | 20.51  | 29.23 | 4.83E-01 | 17.41  | 19.28 | 3.67E-01 |
| cg03150463 | -35.68 | 16.34 | 2.90E-02 | -80.49 | 40.54 | 4.71E-02 | 177.94  | 169.04 | 2.92E-01 | -27.43 | 16.16 | 8.96E-02 | -51.69 | 55.99 | 3.56E-01 |
| cg09989886 | -49.31 | 22.58 | 2.90E-02 | -49.92 | 27.10 | 6.55E-02 | 35.96   | 115.95 | 7.56E-01 | 50.47  | 92.73 | 5.86E-01 | -91.22 | 49.49 | 6.53E-02 |
| cg19089314 | 23.85  | 10.92 | 2.90E-02 | 16.65  | 28.89 | 5.64E-01 | -50.34  | 105.34 | 6.33E-01 | 21.97  | 12.44 | 7.75E-02 | 67.10  | 39.70 | 9.10E-02 |
| cg19825483 | -9.34  | 4.28  | 2.90E-02 | -7.70  | 7.56  | 3.08E-01 | 6.67    | 16.21  | 6.81E-01 | -13.86 | 6.22  | 2.58E-02 | -5.68  | 11.62 | 6.25E-01 |
| cg03804136 | 16.65  | 7.63  | 2.90E-02 | -5.44  | 25.07 | 8.28E-01 | -46.43  | 92.61  | 6.16E-01 | 17.86  | 8.55  | 3.66E-02 | 31.15  | 23.64 | 1.88E-01 |
| cg24795297 | 22.03  | 10.09 | 2.90E-02 | 9.91   | 19.33 | 6.08E-01 | 23.67   | 37.69  | 5.30E-01 | 23.70  | 13.87 | 8.75E-02 | 40.33  | 28.42 | 1.56E-01 |
| cg10574783 | -18.65 | 8.54  | 2.90E-02 | -18.93 | 16.81 | 2.60E-01 | -5.65   | 26.93  | 8.34E-01 | -21.49 | 11.71 | 6.66E-02 | -16.11 | 25.82 | 5.33E-01 |
| cg12882392 | 19.84  | 9.09  | 2.90E-02 | 19.97  | 16.40 | 2.23E-01 | 25.99   | 16.98  | 1.26E-01 | 12.00  | 18.26 | 5.11E-01 | 20.72  | 22.82 | 3.64E-01 |
| cg03120829 | -39.24 | 17.98 | 2.90E-02 | -42.42 | 23.24 | 6.80E-02 | 18.60   | 74.42  | 8.03E-01 | -77.08 | 85.31 | 3.66E-01 | -38.56 | 32.88 | 2.41E-01 |
| cg22412680 | -13.12 | 6.01  | 2.90E-02 | -20.23 | 9.34  | 3.02E-02 | -3.00   | 13.61  | 8.25E-01 | -2.02  | 16.19 | 9.01E-01 | -15.30 | 11.94 | 2.00E-01 |
| cg20122727 | 14.19  | 6.50  | 2.90E-02 | 23.02  | 9.65  | 1.70E-02 | -11.15  | 22.02  | 6.13E-01 | 1.79   | 16.17 | 9.12E-01 | 14.89  | 11.93 | 2.12E-01 |
| cg10536898 | 9.16   | 4.20  | 2.90E-02 | 11.34  | 5.94  | 5.60E-02 | 10.66   | 9.61   | 2.67E-01 | 5.70   | 12.99 | 6.61E-01 | 4.20   | 9.28  | 6.50E-01 |
| cg16658579 | 14.90  | 6.82  | 2.90E-02 | 15.52  | 13.16 | 2.38E-01 | 8.36    | 11.20  | 4.56E-01 | 20.05  | 13.26 | 1.30E-01 | 24.24  | 22.08 | 2.72E-01 |
| cg06372475 | 10.98  | 5.03  | 2.91E-02 | 12.21  | 6.43  | 5.77E-02 | 16.32   | 13.85  | 2.39E-01 | 7.04   | 14.38 | 6.24E-01 | 3.71   | 13.75 | 7.87E-01 |
| cg03187073 | 5.60   | 2.57  | 2.91E-02 | 3.62   | 3.52  | 3.04E-01 | 11.53   | 6.45   | 7.37E-02 | 10.33  | 6.26  | 9.88E-02 | 0.82   | 6.77  | 9.03E-01 |
| cg06860998 | 7.88   | 3.61  | 2.91E-02 | 7.55   | 5.18  | 1.45E-01 | 6.85    | 9.10   | 4.51E-01 | -3.46  | 12.98 | 7.90E-01 | 12.17  | 6.82  | 7.45E-02 |
| cg23129573 | 7.88   | 3.61  | 2.91E-02 | 7.20   | 7.08  | 3.09E-01 | 3.98    | 7.75   | 6.07E-01 | 10.26  | 6.63  | 1.22E-01 | 9.26   | 7.58  | 2.21E-01 |
| cg11848928 | 19.30  | 8.84  | 2.91E-02 | 26.54  | 12.76 | 3.75E-02 | 25.68   | 20.00  | 1.99E-01 | 2.70   | 27.18 | 9.21E-01 | 5.72   | 18.92 | 7.63E-01 |
| cg21747617 | 18.71  | 8.57  | 2.91E-02 | -4.57  | 33.05 | 8.90E-01 | 6.83    | 114.03 | 9.52E-01 | 21.28  | 9.13  | 1.97E-02 | 4.71   | 40.29 | 9.07E-01 |
| cg13427055 | -41.61 | 19.07 | 2.91E-02 | -53.02 | 24.41 | 2.98E-02 | -76.01  | 65.79  | 2.48E-01 | 33.73  | 54.53 | 5.36E-01 | -38.11 | 44.51 | 3.92E-01 |
| cg21696012 | 6.88   | 3.15  | 2.91E-02 | 5.55   | 2.95  | 5.95E-02 | 13.79   | 6.13   | 2.45E-02 | 13.89  | 8.05  | 8.42E-02 | -2.30  | 6.58  | 7.26E-01 |



|            |        |       |          |        |       |          |         |        |          |        |       |          |        |       |          |
|------------|--------|-------|----------|--------|-------|----------|---------|--------|----------|--------|-------|----------|--------|-------|----------|
| cg16015276 | 18.50  | 8.47  | 2.91E-02 | 28.86  | 24.88 | 2.46E-01 | -17.70  | 61.64  | 7.74E-01 | 15.74  | 10.44 | 1.31E-01 | 24.79  | 18.68 | 1.84E-01 |
| cg18267471 | -43.28 | 19.83 | 2.91E-02 | -48.17 | 24.79 | 5.20E-02 | -87.99  | 92.83  | 3.43E-01 | -20.69 | 77.65 | 7.90E-01 | -28.44 | 39.72 | 4.74E-01 |
| cg02433979 | -13.22 | 6.06  | 2.91E-02 | -11.15 | 11.57 | 3.35E-01 | -7.39   | 15.59  | 6.35E-01 | -13.15 | 9.87  | 1.83E-01 | -20.72 | 13.64 | 1.29E-01 |
| cg02780849 | 18.47  | 8.46  | 2.91E-02 | 22.36  | 9.20  | 1.50E-02 | -37.73  | 34.92  | 2.80E-01 | 8.55   | 12.36 | 4.89E-01 | 32.88  | 11.48 | 4.18E-03 |
| cg24943198 | -12.81 | 5.87  | 2.91E-02 | -19.72 | 12.47 | 1.14E-01 | -7.44   | 16.19  | 6.46E-01 | -14.24 | 8.40  | 9.02E-02 | -3.25  | 14.73 | 8.26E-01 |
| cg05686990 | -14.43 | 6.61  | 2.91E-02 | -17.07 | 15.08 | 2.58E-01 | -31.35  | 36.46  | 3.90E-01 | -14.42 | 8.13  | 7.63E-02 | -5.19  | 19.54 | 7.91E-01 |
| cg19262958 | 18.17  | 8.32  | 2.91E-02 | 5.38   | 16.72 | 7.48E-01 | 14.01   | 15.56  | 3.68E-01 | 18.19  | 14.09 | 1.97E-01 | 55.25  | 24.30 | 2.30E-02 |
| cg19773296 | 14.26  | 6.53  | 2.91E-02 | 7.72   | 12.76 | 5.45E-01 | 21.83   | 22.92  | 3.41E-01 | 14.23  | 8.95  | 1.12E-01 | 23.30  | 18.61 | 2.10E-01 |
| cg18334345 | -11.35 | 5.20  | 2.91E-02 | -22.04 | 8.98  | 1.41E-02 | -9.58   | 13.82  | 4.88E-01 | -2.77  | 5.96  | 6.42E-01 | -18.79 | 11.36 | 9.82E-02 |
| cg05521792 | 16.11  | 7.38  | 2.91E-02 | 39.38  | 25.01 | 1.15E-01 | 34.73   | 29.30  | 2.36E-01 | 13.15  | 8.86  | 1.38E-01 | 8.65   | 18.75 | 6.44E-01 |
| cg04042828 | -14.25 | 6.53  | 2.91E-02 | -16.03 | 9.56  | 9.38E-02 | -8.13   | 15.70  | 6.05E-01 | -6.10  | 27.77 | 8.26E-01 | -16.48 | 11.82 | 1.63E-01 |
| cg05111110 | 18.39  | 8.43  | 2.91E-02 | 18.56  | 17.09 | 2.78E-01 | 21.80   | 16.54  | 1.87E-01 | 14.11  | 13.62 | 3.00E-01 | 24.58  | 24.90 | 3.24E-01 |
| cg06105555 | -8.74  | 4.00  | 2.91E-02 | -14.74 | 8.47  | 8.19E-02 | 1.65    | 17.30  | 9.24E-01 | -5.43  | 5.18  | 2.94E-01 | -18.34 | 11.36 | 1.06E-01 |
| cg15999188 | 22.12  | 10.14 | 2.91E-02 | 15.41  | 14.90 | 3.01E-01 | 4.37    | 30.84  | 8.87E-01 | 20.36  | 25.25 | 4.20E-01 | 41.95  | 19.59 | 3.23E-02 |
| cg21187920 | -7.60  | 3.48  | 2.91E-02 | -6.42  | 6.82  | 3.46E-01 | 1.63    | 12.68  | 8.98E-01 | -9.37  | 4.89  | 5.54E-02 | -8.25  | 8.79  | 3.47E-01 |
| cg24505713 | 8.04   | 3.68  | 2.91E-02 | 8.19   | 4.76  | 8.53E-02 | 15.08   | 10.18  | 1.39E-01 | 12.81  | 10.52 | 2.23E-01 | -2.76  | 9.57  | 7.73E-01 |
| cg12746908 | 14.19  | 6.50  | 2.91E-02 | 15.08  | 9.25  | 1.03E-01 | -8.51   | 22.89  | 7.10E-01 | 6.54   | 24.32 | 7.88E-01 | 19.66  | 10.93 | 7.21E-02 |
| cg14908307 | -11.76 | 5.39  | 2.91E-02 | -16.70 | 8.66  | 5.39E-02 | -12.00  | 13.19  | 3.63E-01 | -14.92 | 11.63 | 2.00E-01 | -0.41  | 11.19 | 9.71E-01 |
| cg03716125 | -6.02  | 2.76  | 2.91E-02 | -1.55  | 4.48  | 7.29E-01 | -7.61   | 7.97   | 3.40E-01 | -10.28 | 4.53  | 2.32E-02 | -5.45  | 7.68  | 4.78E-01 |
| cg23711059 | -13.30 | 6.09  | 2.91E-02 | -15.27 | 9.75  | 1.17E-01 | -0.08   | 12.71  | 9.95E-01 | -31.94 | 16.69 | 5.56E-02 | -12.42 | 12.29 | 3.12E-01 |
| cg07281879 | 18.88  | 8.66  | 2.91E-02 | 17.54  | 19.40 | 3.66E-01 | 48.55   | 41.00  | 2.36E-01 | 13.35  | 11.30 | 2.37E-01 | 31.79  | 21.02 | 1.30E-01 |
| cg02632542 | 24.12  | 11.06 | 2.91E-02 | 33.75  | 17.29 | 5.10E-02 | 31.86   | 22.46  | 1.56E-01 | -15.70 | 31.26 | 6.16E-01 | 20.40  | 23.36 | 3.82E-01 |
| cg26196912 | -44.03 | 20.18 | 2.91E-02 | -23.46 | 48.68 | 6.30E-01 | -9.02   | 230.44 | 9.69E-01 | -55.53 | 23.66 | 1.89E-02 | 5.10   | 66.25 | 9.39E-01 |
| cg04360334 | -14.02 | 6.43  | 2.91E-02 | -14.78 | 14.77 | 3.17E-01 | 30.24   | 32.10  | 3.46E-01 | -14.35 | 8.05  | 7.46E-02 | -24.67 | 17.61 | 1.61E-01 |
| cg27020941 | 47.91  | 21.96 | 2.91E-02 | 64.45  | 56.52 | 2.54E-01 | -179.97 | 240.76 | 4.55E-01 | 42.23  | 24.97 | 9.07E-02 | 104.56 | 84.89 | 2.18E-01 |
| cg05245379 | -9.34  | 4.28  | 2.91E-02 | -18.40 | 10.66 | 8.45E-02 | 5.67    | 17.44  | 7.45E-01 | -7.12  | 5.10  | 1.63E-01 | -22.67 | 15.61 | 1.46E-01 |
| cg10514793 | 20.50  | 9.40  | 2.91E-02 | 8.19   | 18.01 | 6.49E-01 | 29.35   | 18.56  | 1.14E-01 | 11.16  | 17.49 | 5.23E-01 | 41.17  | 21.98 | 6.11E-02 |
| cg18669406 | 26.27  | 12.04 | 2.92E-02 | 17.04  | 16.54 | 3.03E-01 | 29.56   | 30.92  | 3.39E-01 | 100.70 | 45.01 | 2.53E-02 | 22.05  | 22.03 | 3.17E-01 |
| cg20300135 | 11.83  | 5.42  | 2.92E-02 | 18.57  | 15.20 | 2.22E-01 | -27.11  | 31.28  | 3.86E-01 | 11.10  | 6.08  | 6.82E-02 | 30.15  | 24.55 | 2.19E-01 |
| cg24843413 | 35.47  | 16.26 | 2.92E-02 | 49.58  | 22.86 | 3.01E-02 | 24.44   | 101.53 | 8.10E-01 | 36.06  | 38.54 | 3.50E-01 | 11.49  | 30.18 | 7.03E-01 |
| cg13433612 | 15.05  | 6.90  | 2.92E-02 | 23.51  | 15.15 | 1.21E-01 | 0.21    | 21.22  | 9.92E-01 | 14.17  | 9.19  | 1.23E-01 | 17.52  | 19.62 | 3.72E-01 |
| cg06555246 | 17.71  | 8.12  | 2.92E-02 | 13.15  | 13.04 | 3.13E-01 | 18.49   | 14.78  | 2.11E-01 | 20.26  | 21.78 | 3.52E-01 | 24.57  | 19.59 | 2.10E-01 |
| cg04050463 | 8.63   | 3.96  | 2.92E-02 | 10.25  | 5.11  | 4.48E-02 | 14.79   | 11.42  | 1.95E-01 | 11.02  | 21.62 | 6.10E-01 | 1.37   | 7.96  | 8.64E-01 |
| cg04901622 | -17.37 | 7.96  | 2.92E-02 | -13.30 | 23.05 | 5.64E-01 | -17.01  | 36.66  | 6.43E-01 | -19.14 | 9.12  | 3.58E-02 | -5.36  | 29.88 | 8.58E-01 |
| cg11397135 | 17.28  | 7.92  | 2.92E-02 | 25.30  | 13.75 | 6.58E-02 | 20.05   | 13.23  | 1.30E-01 | 0.25   | 19.48 | 9.90E-01 | 11.45  | 20.90 | 5.84E-01 |

|            |        |       |          |        |       |          |        |        |          |        |       |          |        |       |          |
|------------|--------|-------|----------|--------|-------|----------|--------|--------|----------|--------|-------|----------|--------|-------|----------|
| cg03415518 | 12.31  | 5.65  | 2.92E-02 | 4.40   | 12.57 | 7.26E-01 | 18.86  | 11.44  | 9.91E-02 | 9.39   | 8.08  | 2.45E-01 | 33.78  | 21.87 | 1.23E-01 |
| cg08981228 | 21.43  | 9.83  | 2.92E-02 | 30.48  | 13.80 | 2.72E-02 | -6.95  | 29.99  | 8.17E-01 | 45.98  | 28.97 | 1.13E-01 | 5.30   | 18.89 | 7.79E-01 |
| cg02810660 | -19.16 | 8.79  | 2.92E-02 | -25.23 | 18.21 | 1.66E-01 | -22.15 | 44.84  | 6.21E-01 | -20.25 | 11.00 | 6.56E-02 | 5.25   | 29.14 | 8.57E-01 |
| cg07148197 | 23.91  | 10.96 | 2.92E-02 | 20.44  | 24.70 | 4.08E-01 | -25.24 | 69.72  | 7.17E-01 | 29.24  | 13.35 | 2.86E-02 | 7.68   | 33.95 | 8.21E-01 |
| cg22590761 | 10.07  | 4.62  | 2.92E-02 | 14.71  | 6.46  | 2.27E-02 | 8.65   | 11.23  | 4.41E-01 | 4.35   | 11.43 | 7.04E-01 | 2.40   | 11.68 | 8.37E-01 |
| cg02804087 | 43.50  | 19.95 | 2.92E-02 | 40.24  | 50.63 | 4.27E-01 | 225.46 | 158.95 | 1.56E-01 | 27.60  | 16.18 | 8.80E-02 | 99.60  | 47.68 | 3.67E-02 |
| cg18155267 | -7.86  | 3.61  | 2.92E-02 | -9.90  | 4.82  | 3.99E-02 | -5.99  | 7.81   | 4.43E-01 | -2.24  | 18.31 | 9.03E-01 | -5.07  | 8.31  | 5.42E-01 |
| cg04421583 | -8.38  | 3.84  | 2.92E-02 | -12.71 | 8.40  | 1.30E-01 | 3.06   | 14.45  | 8.32E-01 | -8.96  | 4.98  | 7.19E-02 | -4.81  | 10.84 | 6.57E-01 |
| cg24532400 | -27.87 | 12.78 | 2.92E-02 | -20.74 | 42.78 | 6.28E-01 | -29.65 | 157.29 | 8.50E-01 | -32.54 | 13.82 | 1.86E-02 | 40.02  | 57.40 | 4.86E-01 |
| cg19730691 | 12.62  | 5.78  | 2.92E-02 | 14.25  | 8.75  | 1.03E-01 | -1.41  | 11.45  | 9.02E-01 | 32.52  | 14.74 | 2.73E-02 | 11.64  | 10.63 | 2.73E-01 |
| cg01950844 | 16.50  | 7.57  | 2.92E-02 | 7.99   | 12.46 | 5.21E-01 | 25.35  | 42.95  | 5.55E-01 | 19.32  | 11.83 | 1.02E-01 | 25.47  | 17.32 | 1.41E-01 |
| cg00028929 | -11.33 | 5.19  | 2.92E-02 | -7.40  | 9.22  | 4.22E-01 | -8.95  | 10.77  | 4.06E-01 | -20.36 | 10.28 | 4.75E-02 | -8.71  | 11.77 | 4.59E-01 |
| cg00227225 | 28.68  | 13.15 | 2.92E-02 | 51.12  | 20.41 | 1.22E-02 | 3.38   | 36.76  | 9.27E-01 | 28.69  | 33.48 | 3.91E-01 | 8.57   | 23.92 | 7.20E-01 |
| cg13844463 | -8.99  | 4.12  | 2.92E-02 | -12.64 | 6.18  | 4.07E-02 | 0.29   | 7.83   | 9.70E-01 | -18.56 | 15.57 | 2.33E-01 | -10.27 | 9.03  | 2.55E-01 |
| cg00169354 | 3.62   | 1.66  | 2.92E-02 | 3.05   | 2.06  | 1.39E-01 | 5.19   | 3.30   | 1.15E-01 | 8.25   | 3.53  | 1.95E-02 | -0.80  | 3.22  | 8.03E-01 |
| cg21638533 | 6.02   | 2.76  | 2.92E-02 | 5.81   | 3.40  | 8.73E-02 | 12.68  | 7.41   | 8.68E-02 | -1.96  | 9.96  | 8.44E-01 | 4.61   | 7.84  | 5.56E-01 |
| cg23063070 | -10.46 | 4.80  | 2.92E-02 | -6.21  | 13.56 | 6.47E-01 | -23.74 | 24.63  | 3.35E-01 | -8.85  | 5.59  | 1.13E-01 | -22.54 | 15.15 | 1.37E-01 |
| cg14527439 | 8.56   | 3.93  | 2.92E-02 | 5.48   | 5.76  | 3.41E-01 | 17.85  | 9.12   | 5.02E-02 | 16.56  | 11.77 | 1.60E-01 | 3.60   | 8.05  | 6.55E-01 |
| cg23985995 | 6.48   | 2.97  | 2.92E-02 | 9.84   | 4.30  | 2.19E-02 | 7.06   | 6.88   | 3.04E-01 | -4.24  | 8.12  | 6.01E-01 | 5.09   | 6.66  | 4.45E-01 |
| cg07823755 | -12.94 | 5.94  | 2.92E-02 | -9.65  | 15.62 | 5.37E-01 | -19.62 | 30.25  | 5.16E-01 | -13.43 | 7.10  | 5.86E-02 | -11.90 | 17.23 | 4.90E-01 |
| cg24628866 | 19.46  | 8.92  | 2.92E-02 | 40.68  | 19.97 | 4.17E-02 | 4.55   | 20.72  | 8.26E-01 | 11.32  | 12.68 | 3.72E-01 | 40.76  | 25.76 | 1.14E-01 |
| cg15407257 | -11.41 | 5.23  | 2.92E-02 | -19.26 | 7.59  | 1.12E-02 | -0.58  | 11.85  | 9.61E-01 | 3.72   | 18.28 | 8.39E-01 | -9.87  | 10.51 | 3.48E-01 |
| cg00655184 | 6.58   | 3.02  | 2.92E-02 | 8.37   | 4.36  | 5.49E-02 | 5.59   | 7.72   | 4.69E-01 | 9.80   | 8.23  | 2.34E-01 | 1.71   | 6.23  | 7.84E-01 |
| cg21193484 | -27.03 | 12.40 | 2.92E-02 | -29.80 | 15.75 | 5.84E-02 | -30.07 | 39.15  | 4.42E-01 | -90.60 | 47.14 | 5.46E-02 | 0.97   | 25.90 | 9.70E-01 |
| cg12817782 | 11.97  | 5.49  | 2.92E-02 | 3.03   | 12.62 | 8.10E-01 | 7.36   | 13.91  | 5.97E-01 | 17.25  | 7.74  | 2.58E-02 | 10.33  | 14.12 | 4.65E-01 |
| cg10925729 | -7.84  | 3.60  | 2.92E-02 | -8.95  | 6.14  | 1.45E-01 | -7.02  | 6.43   | 2.75E-01 | -15.32 | 9.32  | 1.00E-01 | -1.48  | 8.15  | 8.56E-01 |
| cg04283815 | 10.94  | 5.02  | 2.92E-02 | 11.36  | 7.00  | 1.05E-01 | 12.21  | 12.25  | 3.19E-01 | 17.05  | 15.54 | 2.73E-01 | 5.98   | 10.85 | 5.82E-01 |
| cg13515269 | -8.98  | 4.12  | 2.92E-02 | -18.44 | 7.60  | 1.52E-02 | -6.88  | 9.50   | 4.69E-01 | -5.89  | 6.68  | 3.78E-01 | -0.24  | 11.05 | 9.83E-01 |
| cg03793804 | 17.80  | 8.16  | 2.92E-02 | 2.79   | 16.25 | 8.63E-01 | -2.67  | 39.37  | 9.46E-01 | 26.61  | 10.70 | 1.29E-02 | 13.97  | 23.37 | 5.50E-01 |
| cg11884704 | 9.73   | 4.46  | 2.93E-02 | 10.22  | 5.93  | 8.51E-02 | 8.07   | 9.27   | 3.84E-01 | 22.24  | 17.55 | 2.05E-01 | 4.66   | 12.00 | 6.98E-01 |
| cg26582706 | -13.66 | 6.27  | 2.93E-02 | -9.46  | 13.80 | 4.93E-01 | 12.57  | 27.65  | 6.49E-01 | -18.17 | 7.71  | 1.85E-02 | -4.43  | 21.81 | 8.39E-01 |
| cg27217350 | -9.61  | 4.41  | 2.93E-02 | -7.53  | 5.86  | 1.99E-01 | -7.98  | 11.77  | 4.98E-01 | -6.83  | 11.74 | 5.61E-01 | -21.30 | 11.25 | 5.84E-02 |
| cg22732644 | -9.54  | 4.38  | 2.93E-02 | -16.46 | 6.95  | 1.78E-02 | -0.89  | 9.16   | 9.23E-01 | -2.13  | 7.86  | 7.87E-01 | -17.12 | 9.43  | 6.94E-02 |
| cg07270021 | -15.21 | 6.98  | 2.93E-02 | -28.14 | 10.48 | 7.23E-03 | -24.41 | 18.51  | 1.87E-01 | -4.65  | 5.27  | 3.77E-01 | -18.67 | 15.90 | 2.40E-01 |
| cg27196467 | 7.09   | 3.25  | 2.93E-02 | 6.48   | 3.65  | 7.59E-02 | 9.40   | 5.85   | 1.08E-01 | 26.54  | 12.01 | 2.71E-02 | 1.11   | 5.34  | 8.36E-01 |

|            |        |       |          |        |       |          |         |        |          |         |       |          |        |       |          |
|------------|--------|-------|----------|--------|-------|----------|---------|--------|----------|---------|-------|----------|--------|-------|----------|
| cg12292531 | 41.57  | 19.07 | 2.93E-02 | 20.72  | 22.78 | 3.63E-01 | 0.39    | 77.44  | 9.96E-01 | 83.41   | 42.79 | 5.13E-02 | 93.23  | 50.28 | 6.37E-02 |
| cg27067760 | 13.89  | 6.37  | 2.93E-02 | 13.61  | 8.36  | 1.03E-01 | 33.14   | 15.43  | 3.17E-02 | 1.25    | 24.46 | 9.59E-01 | 1.33   | 15.00 | 9.29E-01 |
| cg06245962 | -28.75 | 13.19 | 2.93E-02 | -41.22 | 23.76 | 8.28E-02 | 99.67   | 180.06 | 5.80E-01 | -34.07  | 16.09 | 3.42E-02 | 32.44  | 41.18 | 4.31E-01 |
| cg06516865 | -10.60 | 4.86  | 2.93E-02 | -7.94  | 6.66  | 2.33E-01 | -17.90  | 13.99  | 2.01E-01 | -3.22   | 15.18 | 8.32E-01 | -15.89 | 9.85  | 1.07E-01 |
| cg15264811 | 33.53  | 15.38 | 2.93E-02 | 56.16  | 21.31 | 8.40E-03 | 22.83   | 44.56  | 6.08E-01 | -8.76   | 53.22 | 8.69E-01 | 8.24   | 29.27 | 7.78E-01 |
| cg02973469 | 12.67  | 5.81  | 2.93E-02 | 19.74  | 14.58 | 1.76E-01 | -7.72   | 34.46  | 8.23E-01 | 18.65   | 8.04  | 2.04E-02 | 0.04   | 10.79 | 9.97E-01 |
| cg00301601 | -46.58 | 21.37 | 2.93E-02 | -77.52 | 40.84 | 5.77E-02 | -345.77 | 244.51 | 1.57E-01 | -24.34  | 28.72 | 3.97E-01 | -56.07 | 52.66 | 2.87E-01 |
| cg00056985 | 24.34  | 11.16 | 2.93E-02 | 21.60  | 19.13 | 2.59E-01 | 1.64    | 33.92  | 9.61E-01 | 43.62   | 23.61 | 6.46E-02 | 21.52  | 19.51 | 2.70E-01 |
| cg03105603 | 30.50  | 13.99 | 2.93E-02 | 21.31  | 27.24 | 4.34E-01 | -51.09  | 74.15  | 4.91E-01 | 36.35   | 18.58 | 5.04E-02 | 45.54  | 38.27 | 2.34E-01 |
| cg26203839 | 12.18  | 5.59  | 2.93E-02 | 12.63  | 7.72  | 1.02E-01 | 14.69   | 11.49  | 2.01E-01 | 26.54   | 19.91 | 1.83E-01 | 0.00   | 13.94 | 1.00E+00 |
| cg27527736 | 36.44  | 16.72 | 2.93E-02 | -17.51 | 51.41 | 7.33E-01 | 31.02   | 160.76 | 8.47E-01 | 39.39   | 18.60 | 3.42E-02 | 81.23  | 60.87 | 1.82E-01 |
| cg08303283 | 10.33  | 4.74  | 2.93E-02 | 9.32   | 8.97  | 2.99E-01 | 6.48    | 10.79  | 5.48E-01 | 13.97   | 7.37  | 5.81E-02 | 6.15   | 13.93 | 6.59E-01 |
| cg05854601 | -7.96  | 3.65  | 2.93E-02 | -7.62  | 8.26  | 3.56E-01 | -6.31   | 16.24  | 6.98E-01 | -9.63   | 4.66  | 3.87E-02 | -1.66  | 9.78  | 8.65E-01 |
| cg07617339 | -31.78 | 14.58 | 2.93E-02 | -25.26 | 17.05 | 1.39E-01 | -50.61  | 66.33  | 4.45E-01 | -116.11 | 69.38 | 9.42E-02 | -32.52 | 34.69 | 3.48E-01 |
| cg17073859 | 19.68  | 9.03  | 2.93E-02 | 26.82  | 12.38 | 3.02E-02 | 19.84   | 20.20  | 3.26E-01 | -2.69   | 27.56 | 9.22E-01 | 10.77  | 22.55 | 6.33E-01 |
| cg01503881 | -25.12 | 11.53 | 2.93E-02 | 0.57   | 36.09 | 9.87E-01 | -12.23  | 151.80 | 9.36E-01 | -32.27  | 12.98 | 1.29E-02 | 3.42   | 35.87 | 9.24E-01 |
| cg09234567 | 24.02  | 11.02 | 2.93E-02 | 35.89  | 38.37 | 3.50E-01 | 129.76  | 131.90 | 3.25E-01 | 21.24   | 12.73 | 9.53E-02 | 26.28  | 27.43 | 3.38E-01 |
| cg13026773 | 8.60   | 3.94  | 2.93E-02 | 9.97   | 8.78  | 2.56E-01 | 25.32   | 12.03  | 3.53E-02 | 6.39    | 5.13  | 2.13E-01 | 0.91   | 12.45 | 9.42E-01 |
| cg24498031 | 29.31  | 13.45 | 2.93E-02 | 52.75  | 45.63 | 2.48E-01 | -94.43  | 154.76 | 5.42E-01 | 31.23   | 14.62 | 3.27E-02 | -16.69 | 55.28 | 7.63E-01 |
| cg21816456 | -15.00 | 6.88  | 2.93E-02 | -16.71 | 11.49 | 1.46E-01 | -69.38  | 31.02  | 2.53E-02 | -9.70   | 6.09  | 1.11E-01 | -16.12 | 21.78 | 4.59E-01 |
| cg10774018 | 35.15  | 16.13 | 2.93E-02 | 72.75  | 38.63 | 5.96E-02 | -57.33  | 190.31 | 7.63E-01 | 34.35   | 18.96 | 7.00E-02 | -20.77 | 52.29 | 6.91E-01 |
| cg03549227 | 11.85  | 5.44  | 2.93E-02 | 5.71   | 10.33 | 5.80E-01 | -4.63   | 15.72  | 7.69E-01 | 19.10   | 7.72  | 1.33E-02 | 12.56  | 16.66 | 4.51E-01 |
| cg12136950 | -13.06 | 5.99  | 2.93E-02 | -16.78 | 9.10  | 6.52E-02 | 1.18    | 10.82  | 9.13E-01 | -12.15  | 12.44 | 3.29E-01 | -30.97 | 14.95 | 3.83E-02 |
| cg14117166 | 26.82  | 12.31 | 2.93E-02 | 63.59  | 40.27 | 1.14E-01 | 66.38   | 132.50 | 6.16E-01 | 22.14   | 13.89 | 1.11E-01 | 25.96  | 36.71 | 4.79E-01 |
| cg16416806 | 19.53  | 8.96  | 2.93E-02 | 1.60   | 27.14 | 9.53E-01 | -6.87   | 159.95 | 9.66E-01 | 23.32   | 9.81  | 1.74E-02 | -1.68  | 38.91 | 9.66E-01 |
| cg23822732 | -18.20 | 8.35  | 2.93E-02 | -19.84 | 17.12 | 2.47E-01 | -29.80  | 37.32  | 4.25E-01 | -15.29  | 11.18 | 1.71E-01 | -22.47 | 21.31 | 2.92E-01 |
| cg11063167 | 25.63  | 11.76 | 2.93E-02 | 49.65  | 30.60 | 1.05E-01 | -12.07  | 113.13 | 9.15E-01 | 21.82   | 13.38 | 1.03E-01 | 22.72  | 44.73 | 6.12E-01 |
| cg25294502 | -36.57 | 16.78 | 2.93E-02 | -22.56 | 21.59 | 2.96E-01 | -66.67  | 49.65  | 1.79E-01 | -55.81  | 63.39 | 3.79E-01 | -53.99 | 36.52 | 1.39E-01 |
| cg24686074 | 23.69  | 10.87 | 2.93E-02 | 16.16  | 28.22 | 5.67E-01 | 3.28    | 98.36  | 9.73E-01 | 21.56   | 12.32 | 8.01E-02 | 73.68  | 44.20 | 9.55E-02 |
| cg25391143 | -14.48 | 6.65  | 2.93E-02 | -33.77 | 19.81 | 8.81E-02 | -15.19  | 35.62  | 6.70E-01 | -13.52  | 7.40  | 6.77E-02 | 16.28  | 30.88 | 5.98E-01 |
| cg17399362 | 12.92  | 5.93  | 2.93E-02 | 12.35  | 13.22 | 3.50E-01 | -35.72  | 42.70  | 4.03E-01 | 16.17   | 7.26  | 2.59E-02 | 2.90   | 17.78 | 8.70E-01 |
| cg15612053 | 20.69  | 9.50  | 2.93E-02 | 23.75  | 14.51 | 1.02E-01 | 24.97   | 19.07  | 1.90E-01 | 1.53    | 28.77 | 9.57E-01 | 19.38  | 20.50 | 3.45E-01 |
| cg11377088 | 50.83  | 23.33 | 2.93E-02 | 66.26  | 33.14 | 4.56E-02 | 26.96   | 78.26  | 7.31E-01 | 67.45   | 43.71 | 1.23E-01 | -27.64 | 64.52 | 6.68E-01 |
| cg24167606 | 22.89  | 10.51 | 2.94E-02 | 22.72  | 13.87 | 1.02E-01 | 61.69   | 33.73  | 6.74E-02 | 36.23   | 34.55 | 2.94E-01 | 2.21   | 21.60 | 9.19E-01 |
| cg22391205 | -12.99 | 5.96  | 2.94E-02 | -18.74 | 9.09  | 3.92E-02 | 17.40   | 18.47  | 3.46E-01 | -16.82  | 13.14 | 2.01E-01 | -13.32 | 10.18 | 1.91E-01 |

|            |        |       |          |        |       |          |        |        |          |         |       |          |        |       |          |
|------------|--------|-------|----------|--------|-------|----------|--------|--------|----------|---------|-------|----------|--------|-------|----------|
| cg22950904 | -12.36 | 5.68  | 2.94E-02 | -15.26 | 8.60  | 7.61E-02 | -2.57  | 15.98  | 8.72E-01 | -21.07  | 13.50 | 1.19E-01 | -6.40  | 11.09 | 5.64E-01 |
| cg25503410 | -14.96 | 6.87  | 2.94E-02 | -9.20  | 16.64 | 5.81E-01 | -12.48 | 31.55  | 6.92E-01 | -13.23  | 8.40  | 1.15E-01 | -34.91 | 20.42 | 8.74E-02 |
| cg02759765 | 32.75  | 15.03 | 2.94E-02 | 17.04  | 34.44 | 6.21E-01 | 38.79  | 102.26 | 7.04E-01 | 33.29   | 17.97 | 6.39E-02 | 61.18  | 50.80 | 2.28E-01 |
| cg08188486 | 17.75  | 8.15  | 2.94E-02 | 20.64  | 14.82 | 1.64E-01 | 27.78  | 15.88  | 8.01E-02 | 6.46    | 14.97 | 6.66E-01 | 16.54  | 21.94 | 4.51E-01 |
| cg17786659 | 12.66  | 5.81  | 2.94E-02 | 10.97  | 7.76  | 1.58E-01 | 23.33  | 12.28  | 5.74E-02 | 7.10    | 25.83 | 7.83E-01 | 5.61   | 14.31 | 6.95E-01 |
| cg14637631 | 28.14  | 12.92 | 2.94E-02 | -0.75  | 24.61 | 9.76E-01 | 14.26  | 52.76  | 7.87E-01 | 49.08   | 18.11 | 6.73E-03 | 16.22  | 32.75 | 6.21E-01 |
| cg11085282 | 10.90  | 5.00  | 2.94E-02 | 15.09  | 11.89 | 2.04E-01 | 20.41  | 12.72  | 1.09E-01 | 7.84    | 6.80  | 2.49E-01 | 6.50   | 14.03 | 6.43E-01 |
| cg19198791 | 34.27  | 15.73 | 2.94E-02 | 72.38  | 36.64 | 4.82E-02 | -36.37 | 146.93 | 8.04E-01 | 32.79   | 18.61 | 7.81E-02 | -23.12 | 52.46 | 6.59E-01 |
| cg01447902 | 29.73  | 13.65 | 2.94E-02 | 20.93  | 20.18 | 3.00E-01 | 47.00  | 26.66  | 7.79E-02 | -21.29  | 50.08 | 6.71E-01 | 45.62  | 30.03 | 1.29E-01 |
| cg21049397 | -10.99 | 5.05  | 2.94E-02 | -22.65 | 11.38 | 4.66E-02 | -1.56  | 15.19  | 9.18E-01 | -9.15   | 6.53  | 1.61E-01 | -9.43  | 16.29 | 5.63E-01 |
| cg23182674 | -23.33 | 10.71 | 2.94E-02 | -22.94 | 24.31 | 3.45E-01 | -14.44 | 51.60  | 7.80E-01 | -31.57  | 13.20 | 1.68E-02 | 24.20  | 33.14 | 4.65E-01 |
| cg07803856 | -8.16  | 3.75  | 2.94E-02 | -4.90  | 5.82  | 4.00E-01 | -8.63  | 9.58   | 3.68E-01 | -5.61   | 8.40  | 5.04E-01 | -15.78 | 7.74  | 4.14E-02 |
| cg00020052 | 37.76  | 17.34 | 2.94E-02 | 70.94  | 18.79 | 1.60E-04 | -21.60 | 55.70  | 6.98E-01 | 40.33   | 26.01 | 1.21E-01 | 14.58  | 21.17 | 4.91E-01 |
| cg09844976 | 8.75   | 4.02  | 2.94E-02 | 10.98  | 5.66  | 5.25E-02 | 7.54   | 8.04   | 3.48E-01 | 3.99    | 16.80 | 8.12E-01 | 5.86   | 9.21  | 5.24E-01 |
| cg16006841 | 2.48   | 1.14  | 2.94E-02 | 0.36   | 1.03  | 7.23E-01 | 3.63   | 1.68   | 3.04E-02 | 4.34    | 2.92  | 1.37E-01 | 4.04   | 2.00  | 4.34E-02 |
| cg26975587 | -18.21 | 8.36  | 2.94E-02 | -34.87 | 22.22 | 1.16E-01 | 12.88  | 47.87  | 7.88E-01 | -16.84  | 9.67  | 8.16E-02 | -13.40 | 29.48 | 6.49E-01 |
| cg07546334 | -8.27  | 3.80  | 2.94E-02 | -10.06 | 8.22  | 2.21E-01 | 0.97   | 12.64  | 9.39E-01 | -8.62   | 5.03  | 8.71E-02 | -10.27 | 10.62 | 3.33E-01 |
| cg03588966 | 19.08  | 8.76  | 2.94E-02 | 20.39  | 17.75 | 2.51E-01 | 30.17  | 24.60  | 2.20E-01 | 17.94   | 11.97 | 1.34E-01 | 7.24   | 28.52 | 8.00E-01 |
| cg10665892 | -8.95  | 4.11  | 2.94E-02 | -7.24  | 5.88  | 2.18E-01 | -13.19 | 8.32   | 1.13E-01 | -3.41   | 15.29 | 8.23E-01 | -10.00 | 9.32  | 2.83E-01 |
| cg05673079 | -8.02  | 3.68  | 2.94E-02 | -12.39 | 9.50  | 1.92E-01 | -5.23  | 11.83  | 6.59E-01 | -7.04   | 4.53  | 1.20E-01 | -10.78 | 12.12 | 3.74E-01 |
| cg03302822 | -9.97  | 4.58  | 2.94E-02 | -10.97 | 5.83  | 5.97E-02 | -22.35 | 11.96  | 6.16E-02 | -0.38   | 14.91 | 9.80E-01 | 0.80   | 12.15 | 9.48E-01 |
| cg10346111 | 10.33  | 4.74  | 2.94E-02 | -5.14  | 11.09 | 6.43E-01 | 26.02  | 20.26  | 1.99E-01 | 13.67   | 5.57  | 1.41E-02 | 3.81   | 19.06 | 8.42E-01 |
| cg05189570 | -10.08 | 4.63  | 2.94E-02 | -23.82 | 12.06 | 4.82E-02 | -3.47  | 25.20  | 8.90E-01 | -5.79   | 5.43  | 2.86E-01 | -24.53 | 15.33 | 1.10E-01 |
| cg21938845 | -80.91 | 37.15 | 2.94E-02 | -56.39 | 54.28 | 2.99E-01 | 46.23  | 207.47 | 8.24E-01 | -195.61 | 78.52 | 1.27E-02 | -44.21 | 70.75 | 5.32E-01 |
| cg23363911 | 27.11  | 12.45 | 2.94E-02 | 74.32  | 33.98 | 2.87E-02 | 146.83 | 152.80 | 3.37E-01 | 18.79   | 14.08 | 1.82E-01 | 19.04  | 44.91 | 6.72E-01 |
| cg15721475 | 22.32  | 10.25 | 2.94E-02 | 35.43  | 20.58 | 8.51E-02 | 11.73  | 23.68  | 6.20E-01 | 12.80   | 15.94 | 4.22E-01 | 39.92  | 26.34 | 1.30E-01 |
| cg15676226 | 32.60  | 14.97 | 2.94E-02 | 70.11  | 26.24 | 7.54E-03 | 23.47  | 90.68  | 7.96E-01 | 12.66   | 17.99 | 4.82E-01 | 34.41  | 38.43 | 3.71E-01 |
| cg20490015 | 15.90  | 7.30  | 2.94E-02 | 7.48   | 16.74 | 6.55E-01 | 0.87   | 32.11  | 9.78E-01 | 17.67   | 8.93  | 4.80E-02 | 29.28  | 24.37 | 2.29E-01 |
| cg17687282 | -12.11 | 5.56  | 2.94E-02 | -7.31  | 10.87 | 5.01E-01 | -22.49 | 14.20  | 1.13E-01 | -9.21   | 8.34  | 2.70E-01 | -18.92 | 14.86 | 2.03E-01 |
| cg15564098 | 10.75  | 4.94  | 2.94E-02 | 9.81   | 8.86  | 2.68E-01 | 14.25  | 17.55  | 4.17E-01 | 11.24   | 7.52  | 1.35E-01 | 9.66   | 11.70 | 4.09E-01 |
| cg27215185 | 8.80   | 4.04  | 2.94E-02 | 9.17   | 5.64  | 1.04E-01 | 11.71  | 10.44  | 2.62E-01 | 9.76    | 8.85  | 2.70E-01 | 2.36   | 11.27 | 8.34E-01 |
| cg00502926 | 7.33   | 3.37  | 2.94E-02 | 10.10  | 4.64  | 2.95E-02 | 10.75  | 7.95   | 1.76E-01 | 2.02    | 8.97  | 8.22E-01 | -1.31  | 8.62  | 8.79E-01 |
| cg15853125 | 26.04  | 11.96 | 2.94E-02 | 22.16  | 16.06 | 1.68E-01 | 52.00  | 41.48  | 2.10E-01 | -8.02   | 44.82 | 8.58E-01 | 34.32  | 22.14 | 1.21E-01 |
| cg12411309 | 33.49  | 15.38 | 2.94E-02 | 37.13  | 18.56 | 4.54E-02 | -17.14 | 66.56  | 7.97E-01 | -53.10  | 80.12 | 5.07E-01 | 48.73  | 32.59 | 1.35E-01 |
| cg02187231 | 9.11   | 4.19  | 2.94E-02 | 14.03  | 6.14  | 2.23E-02 | 8.75   | 8.62   | 3.10E-01 | 1.79    | 11.23 | 8.73E-01 | 1.75   | 10.44 | 8.67E-01 |

|            |        |       |          |        |       |          |         |        |          |        |       |          |        |       |          |
|------------|--------|-------|----------|--------|-------|----------|---------|--------|----------|--------|-------|----------|--------|-------|----------|
| cg06217312 | 20.19  | 9.27  | 2.94E-02 | 14.70  | 16.37 | 3.69E-01 | 7.01    | 39.88  | 8.61E-01 | 24.58  | 13.19 | 6.24E-02 | 22.54  | 25.64 | 3.79E-01 |
| cg15504459 | -41.80 | 19.20 | 2.95E-02 | -53.62 | 24.29 | 2.73E-02 | 7.30    | 65.12  | 9.11E-01 | 17.44  | 70.73 | 8.05E-01 | -47.60 | 41.38 | 2.50E-01 |
| cg16145071 | -61.39 | 28.20 | 2.95E-02 | -75.03 | 37.10 | 4.32E-02 | -13.19  | 151.72 | 9.31E-01 | -82.20 | 65.27 | 2.08E-01 | -11.25 | 62.84 | 8.58E-01 |
| cg11814235 | 15.71  | 7.21  | 2.95E-02 | 16.12  | 11.09 | 1.46E-01 | 20.19   | 16.17  | 2.12E-01 | 16.02  | 21.54 | 4.57E-01 | 11.57  | 14.00 | 4.09E-01 |
| cg17962756 | 6.42   | 2.95  | 2.95E-02 | 8.37   | 4.32  | 5.26E-02 | 6.90    | 6.66   | 3.00E-01 | 5.08   | 6.71  | 4.49E-01 | 1.28   | 7.75  | 8.69E-01 |
| cg05255275 | 18.20  | 8.36  | 2.95E-02 | 16.26  | 12.33 | 1.87E-01 | 32.50   | 30.16  | 2.81E-01 | 54.29  | 37.44 | 1.47E-01 | 13.35  | 13.01 | 3.05E-01 |
| cg24710020 | 20.03  | 9.20  | 2.95E-02 | 37.27  | 15.62 | 1.70E-02 | 18.18   | 15.04  | 2.27E-01 | -2.13  | 15.24 | 8.89E-01 | 33.61  | 21.87 | 1.24E-01 |
| cg11315544 | 15.57  | 7.15  | 2.95E-02 | 9.50   | 18.12 | 6.00E-01 | 19.87   | 20.88  | 3.41E-01 | 14.07  | 8.77  | 1.09E-01 | 38.47  | 28.57 | 1.78E-01 |
| cg03736467 | 39.65  | 18.21 | 2.95E-02 | 48.15  | 22.65 | 3.35E-02 | 25.97   | 100.14 | 7.95E-01 | 15.43  | 94.71 | 8.71E-01 | 25.03  | 34.20 | 4.64E-01 |
| cg00804354 | 9.57   | 4.39  | 2.95E-02 | 13.87  | 6.34  | 2.88E-02 | 15.72   | 13.53  | 2.45E-01 | 4.02   | 9.40  | 6.69E-01 | 1.93   | 9.91  | 8.46E-01 |
| cg00014806 | 25.63  | 11.77 | 2.95E-02 | 23.69  | 31.88 | 4.57E-01 | -152.20 | 127.68 | 2.33E-01 | 26.70  | 13.44 | 4.70E-02 | 36.48  | 39.70 | 3.58E-01 |
| cg15134649 | 32.05  | 14.72 | 2.95E-02 | 31.11  | 19.84 | 1.17E-01 | 33.61   | 58.15  | 5.63E-01 | 16.08  | 32.42 | 6.20E-01 | 52.78  | 34.79 | 1.29E-01 |
| cg20312012 | 4.62   | 2.12  | 2.95E-02 | 3.40   | 2.90  | 2.41E-01 | 8.82    | 4.74   | 6.28E-02 | 6.47   | 5.20  | 2.13E-01 | -0.53  | 6.84  | 9.39E-01 |
| cg04289208 | -8.84  | 4.06  | 2.95E-02 | -9.16  | 5.99  | 1.26E-01 | -9.92   | 10.07  | 3.25E-01 | -7.85  | 9.90  | 4.28E-01 | -8.11  | 8.89  | 3.62E-01 |
| cg06880612 | 12.25  | 5.63  | 2.95E-02 | 22.70  | 8.20  | 5.65E-03 | 12.34   | 13.58  | 3.64E-01 | 12.12  | 9.42  | 1.98E-01 | -3.23  | 10.62 | 7.61E-01 |
| cg03918756 | 23.86  | 10.96 | 2.95E-02 | 29.33  | 21.03 | 1.63E-01 | 76.27   | 33.65  | 2.34E-02 | 17.85  | 11.21 | 1.11E-01 | -4.79  | 32.62 | 8.83E-01 |
| cg21356630 | -15.52 | 7.13  | 2.95E-02 | -14.96 | 10.96 | 1.72E-01 | -25.71  | 15.45  | 9.61E-02 | -6.42  | 18.54 | 7.29E-01 | -12.81 | 15.36 | 4.04E-01 |
| cg14469684 | 8.28   | 3.81  | 2.95E-02 | 6.85   | 4.98  | 1.69E-01 | 16.14   | 9.03   | 7.38E-02 | 7.65   | 14.70 | 6.03E-01 | 5.27   | 9.16  | 5.65E-01 |
| cg12274077 | 35.78  | 16.44 | 2.95E-02 | 43.08  | 22.16 | 5.19E-02 | 11.46   | 52.37  | 8.27E-01 | 4.05   | 48.45 | 9.33E-01 | 44.38  | 33.82 | 1.90E-01 |
| cg04563775 | 54.91  | 25.23 | 2.95E-02 | 38.87  | 38.23 | 3.09E-01 | 110.96  | 82.12  | 1.77E-01 | 59.40  | 66.04 | 3.68E-01 | 58.12  | 44.30 | 1.90E-01 |
| cg02390447 | 12.08  | 5.55  | 2.95E-02 | 7.23   | 7.72  | 3.49E-01 | 6.29    | 12.32  | 6.10E-01 | 28.56  | 22.85 | 2.11E-01 | 24.30  | 11.79 | 3.93E-02 |
| cg05090695 | 8.36   | 3.84  | 2.95E-02 | 9.00   | 5.69  | 1.13E-01 | 11.75   | 8.15   | 1.50E-01 | 5.61   | 10.28 | 5.85E-01 | 4.74   | 8.98  | 5.98E-01 |
| cg03148457 | -7.93  | 3.64  | 2.95E-02 | -9.89  | 4.99  | 4.76E-02 | -8.46   | 8.34   | 3.10E-01 | 14.19  | 15.45 | 3.58E-01 | -8.31  | 7.75  | 2.83E-01 |
| cg16844053 | 5.76   | 2.64  | 2.95E-02 | 5.55   | 3.36  | 9.86E-02 | 9.30    | 7.15   | 1.93E-01 | 7.23   | 8.15  | 3.75E-01 | 2.04   | 7.13  | 7.75E-01 |
| cg14747498 | 18.35  | 8.43  | 2.95E-02 | 4.11   | 11.64 | 7.24E-01 | 22.46   | 14.51  | 1.22E-01 | 10.07  | 18.32 | 5.82E-01 | 41.31  | 15.37 | 7.19E-03 |
| cg23703079 | 7.48   | 3.44  | 2.95E-02 | 8.42   | 5.73  | 1.42E-01 | 7.08    | 7.50   | 3.45E-01 | 5.53   | 8.37  | 5.09E-01 | 7.79   | 6.73  | 2.47E-01 |
| cg10884174 | 36.56  | 16.80 | 2.95E-02 | 32.13  | 19.53 | 9.99E-02 | 126.78  | 68.14  | 6.28E-02 | 37.47  | 63.20 | 5.53E-01 | 18.93  | 46.74 | 6.86E-01 |
| cg26962618 | 8.37   | 3.85  | 2.95E-02 | 8.65   | 5.44  | 1.12E-01 | 8.15    | 7.44   | 2.74E-01 | 8.98   | 12.59 | 4.76E-01 | 7.43   | 10.28 | 4.70E-01 |
| cg25597535 | -10.27 | 4.72  | 2.95E-02 | -13.35 | 6.33  | 3.49E-02 | -0.24   | 9.46   | 9.80E-01 | -19.11 | 5.97  | 1.36E-03 | 0.36   | 9.27  | 9.69E-01 |
| cg25219939 | -15.35 | 7.05  | 2.95E-02 | 0.11   | 20.04 | 9.95E-01 | -2.27   | 37.99  | 9.52E-01 | -15.54 | 9.51  | 1.02E-01 | -23.09 | 13.05 | 7.69E-02 |
| cg13880167 | -17.58 | 8.08  | 2.95E-02 | -27.59 | 17.18 | 1.08E-01 | -6.81   | 44.68  | 8.79E-01 | -18.93 | 9.89  | 5.57E-02 | 17.31  | 28.72 | 5.47E-01 |
| cg00213745 | -17.35 | 7.97  | 2.95E-02 | -12.95 | 20.37 | 5.25E-01 | -10.60  | 27.88  | 7.04E-01 | -15.19 | 9.62  | 1.15E-01 | -51.94 | 28.47 | 6.80E-02 |
| cg24508143 | 42.80  | 19.67 | 2.95E-02 | 10.38  | 15.26 | 4.97E-01 | 34.58   | 60.12  | 5.65E-01 | 91.76  | 41.14 | 2.57E-02 | 60.69  | 20.46 | 3.01E-03 |
| cg05097455 | -41.25 | 18.95 | 2.95E-02 | -51.72 | 24.53 | 3.50E-02 | 64.57   | 76.86  | 4.01E-01 | -48.98 | 73.94 | 5.08E-01 | -40.08 | 36.07 | 2.66E-01 |
| cg09240763 | 30.13  | 13.84 | 2.95E-02 | 8.02   | 12.27 | 5.14E-01 | 31.92   | 28.04  | 2.55E-01 | 79.89  | 33.65 | 1.76E-02 | 38.49  | 19.73 | 5.11E-02 |

|            |        |       |          |         |       |          |         |        |          |        |       |          |        |       |          |
|------------|--------|-------|----------|---------|-------|----------|---------|--------|----------|--------|-------|----------|--------|-------|----------|
| cg27169858 | 19.32  | 8.88  | 2.95E-02 | 6.44    | 16.20 | 6.91E-01 | -35.82  | 66.97  | 5.93E-01 | 27.69  | 11.54 | 1.64E-02 | 18.04  | 29.57 | 5.42E-01 |
| cg14601050 | -36.63 | 16.83 | 2.95E-02 | -36.51  | 22.56 | 1.06E-01 | 61.17   | 68.50  | 3.72E-01 | -78.73 | 50.61 | 1.20E-01 | -41.44 | 32.23 | 1.99E-01 |
| cg02031712 | -8.15  | 3.74  | 2.95E-02 | -11.58  | 6.05  | 5.57E-02 | 6.95    | 13.12  | 5.96E-01 | -10.76 | 6.02  | 7.41E-02 | -0.86  | 9.65  | 9.29E-01 |
| cg05400741 | -36.96 | 16.99 | 2.95E-02 | -36.76  | 20.52 | 7.32E-02 | -58.40  | 72.65  | 4.21E-01 | -7.70  | 61.47 | 9.00E-01 | -43.53 | 39.67 | 2.73E-01 |
| cg06495501 | 45.01  | 20.68 | 2.95E-02 | 47.61   | 18.32 | 9.34E-03 | 57.36   | 62.91  | 3.62E-01 | 122.81 | 51.41 | 1.69E-02 | 1.93   | 29.62 | 9.48E-01 |
| cg16457196 | 23.73  | 10.90 | 2.96E-02 | 17.37   | 16.39 | 2.89E-01 | -40.32  | 45.15  | 3.72E-01 | 26.99  | 14.27 | 5.86E-02 | 53.84  | 27.20 | 4.78E-02 |
| cg05526376 | -44.26 | 20.34 | 2.96E-02 | -82.47  | 53.21 | 1.21E-01 | 115.88  | 209.37 | 5.80E-01 | -35.94 | 23.58 | 1.27E-01 | -65.49 | 64.31 | 3.09E-01 |
| cg08039322 | 20.15  | 9.26  | 2.96E-02 | 3.76    | 21.96 | 8.64E-01 | 52.84   | 92.57  | 5.68E-01 | 24.42  | 11.04 | 2.70E-02 | 16.31  | 28.00 | 5.60E-01 |
| cg24472965 | -10.29 | 4.73  | 2.96E-02 | -11.86  | 8.62  | 1.69E-01 | -6.04   | 11.16  | 5.88E-01 | -10.38 | 7.10  | 1.44E-01 | -13.62 | 17.19 | 4.28E-01 |
| cg06000951 | 19.42  | 8.93  | 2.96E-02 | 48.00   | 17.96 | 7.54E-03 | 17.45   | 23.83  | 4.64E-01 | 18.85  | 10.29 | 6.69E-02 | 1.69   | 13.77 | 9.02E-01 |
| cg16232126 | 10.82  | 4.97  | 2.96E-02 | 16.66   | 9.87  | 9.14E-02 | 5.79    | 12.25  | 6.36E-01 | 12.05  | 8.61  | 1.62E-01 | 6.52   | 9.99  | 5.14E-01 |
| cg02440214 | 19.96  | 9.17  | 2.96E-02 | 23.01   | 19.12 | 2.29E-01 | 26.03   | 38.76  | 5.02E-01 | 20.96  | 12.11 | 8.36E-02 | 8.47   | 24.47 | 7.29E-01 |
| cg03045648 | 16.34  | 7.51  | 2.96E-02 | 23.95   | 12.14 | 4.85E-02 | 22.42   | 15.33  | 1.44E-01 | -4.17  | 15.40 | 7.87E-01 | 19.97  | 20.11 | 3.21E-01 |
| cg22754866 | -10.50 | 4.82  | 2.96E-02 | -13.04  | 12.18 | 2.84E-01 | -10.36  | 26.46  | 6.95E-01 | -12.17 | 5.82  | 3.65E-02 | 2.13   | 13.78 | 8.77E-01 |
| cg26275242 | 18.18  | 8.36  | 2.96E-02 | 16.63   | 22.55 | 4.61E-01 | 0.78    | 59.12  | 9.89E-01 | 18.56  | 9.55  | 5.20E-02 | 21.72  | 30.12 | 4.71E-01 |
| cg11118171 | 15.36  | 7.06  | 2.96E-02 | 14.69   | 9.17  | 1.09E-01 | -3.86   | 20.51  | 8.51E-01 | 17.53  | 23.51 | 4.56E-01 | 27.85  | 15.84 | 7.86E-02 |
| cg22061831 | 11.89  | 5.47  | 2.96E-02 | 16.23   | 19.46 | 4.04E-01 | -0.34   | 29.41  | 9.91E-01 | 11.61  | 6.34  | 6.70E-02 | 13.90  | 14.44 | 3.36E-01 |
| cg10530680 | -12.51 | 5.75  | 2.96E-02 | -20.56  | 14.22 | 1.48E-01 | -6.52   | 16.93  | 7.00E-01 | -7.90  | 7.49  | 2.91E-01 | -28.55 | 15.90 | 7.26E-02 |
| cg14183693 | -13.96 | 6.42  | 2.96E-02 | -11.14  | 17.31 | 5.20E-01 | -26.65  | 20.96  | 2.04E-01 | -12.15 | 8.32  | 1.44E-01 | -15.54 | 15.37 | 3.12E-01 |
| cg23548686 | -40.50 | 18.62 | 2.96E-02 | -44.56  | 22.67 | 4.93E-02 | -93.66  | 79.43  | 2.38E-01 | 43.50  | 61.66 | 4.80E-01 | -51.61 | 43.96 | 2.40E-01 |
| cg24527461 | 11.75  | 5.40  | 2.96E-02 | 9.26    | 8.82  | 2.94E-01 | 10.89   | 9.57   | 2.55E-01 | 12.12  | 12.18 | 3.20E-01 | 22.22  | 16.38 | 1.75E-01 |
| cg26946015 | -9.88  | 4.54  | 2.96E-02 | -16.99  | 8.86  | 5.51E-02 | 6.42    | 12.10  | 5.96E-01 | -9.92  | 6.87  | 1.49E-01 | -12.43 | 11.37 | 2.74E-01 |
| cg00561903 | 8.54   | 3.93  | 2.96E-02 | 14.28   | 7.68  | 6.28E-02 | -5.47   | 15.25  | 7.20E-01 | 4.99   | 5.28  | 3.45E-01 | 20.28  | 11.40 | 7.53E-02 |
| cg15459165 | -8.70  | 4.00  | 2.96E-02 | -5.15   | 5.34  | 3.35E-01 | -15.06  | 11.89  | 2.05E-01 | -2.06  | 10.85 | 8.49E-01 | -20.20 | 9.20  | 2.80E-02 |
| cg23580287 | 16.27  | 7.48  | 2.96E-02 | 17.80   | 19.53 | 3.62E-01 | 1.57    | 24.39  | 9.49E-01 | 16.63  | 9.12  | 6.81E-02 | 26.99  | 25.55 | 2.91E-01 |
| cg14468090 | 12.34  | 5.67  | 2.96E-02 | 15.60   | 8.38  | 6.28E-02 | 16.09   | 11.47  | 1.61E-01 | 10.27  | 15.81 | 5.16E-01 | -0.37  | 13.83 | 9.79E-01 |
| cg10979364 | -10.76 | 4.95  | 2.96E-02 | -23.46  | 10.85 | 3.06E-02 | -5.30   | 21.92  | 8.09E-01 | -6.47  | 6.17  | 2.94E-01 | -14.91 | 15.89 | 3.48E-01 |
| cg27431587 | 18.48  | 8.50  | 2.96E-02 | 18.53   | 12.75 | 1.46E-01 | 19.06   | 19.35  | 3.24E-01 | 15.94  | 17.17 | 3.53E-01 | 22.62  | 24.68 | 3.60E-01 |
| cg05304979 | -11.63 | 5.34  | 2.96E-02 | -34.42  | 18.39 | 6.12E-02 | 2.79    | 81.71  | 9.73E-01 | -7.64  | 5.95  | 2.00E-01 | -24.41 | 16.44 | 1.38E-01 |
| cg00543196 | -47.93 | 22.04 | 2.96E-02 | -12.80  | 37.29 | 7.31E-01 | -344.51 | 249.80 | 1.68E-01 | -68.88 | 27.06 | 1.09E-02 | -12.12 | 74.68 | 8.71E-01 |
| cg00359635 | 12.44  | 5.72  | 2.96E-02 | 18.84   | 17.15 | 2.72E-01 | 25.13   | 22.90  | 2.72E-01 | 9.42   | 6.49  | 1.47E-01 | 28.53  | 25.17 | 2.57E-01 |
| cg13320585 | -8.35  | 3.84  | 2.96E-02 | -2.68   | 7.27  | 7.12E-01 | 1.67    | 10.86  | 8.78E-01 | -14.01 | 5.64  | 1.30E-02 | -9.96  | 10.54 | 3.44E-01 |
| cg22740796 | -7.61  | 3.50  | 2.96E-02 | -8.55   | 5.21  | 1.01E-01 | 0.16    | 6.06   | 9.79E-01 | -20.72 | 12.68 | 1.02E-01 | -12.51 | 7.40  | 9.08E-02 |
| cg10633931 | -42.97 | 19.76 | 2.96E-02 | -109.72 | 51.31 | 3.25E-02 | 83.89   | 177.63 | 6.37E-01 | -28.63 | 23.09 | 2.15E-01 | -63.22 | 60.32 | 2.95E-01 |
| cg09699369 | -31.47 | 14.47 | 2.96E-02 | -69.00  | 50.71 | 1.74E-01 | -244.84 | 235.10 | 2.98E-01 | -27.73 | 15.91 | 8.13E-02 | -22.69 | 48.95 | 6.43E-01 |

|            |        |       |          |        |       |          |        |        |          |         |       |          |         |       |          |
|------------|--------|-------|----------|--------|-------|----------|--------|--------|----------|---------|-------|----------|---------|-------|----------|
| cg14294250 | 18.97  | 8.72  | 2.96E-02 | 4.26   | 32.60 | 8.96E-01 | 15.11  | 106.62 | 8.87E-01 | 18.99   | 9.30  | 4.11E-02 | 44.00   | 42.41 | 2.99E-01 |
| cg01546873 | -9.45  | 4.35  | 2.96E-02 | -14.35 | 11.64 | 2.17E-01 | -31.01 | 18.47  | 9.32E-02 | -5.80   | 5.11  | 2.56E-01 | -18.79  | 15.20 | 2.16E-01 |
| cg11839815 | 5.14   | 2.36  | 2.96E-02 | 5.64   | 3.38  | 9.53E-02 | 7.83   | 5.50   | 1.54E-01 | 4.09    | 5.13  | 4.26E-01 | 0.60    | 6.99  | 9.31E-01 |
| cg19655510 | 16.40  | 7.54  | 2.96E-02 | 40.51  | 18.85 | 3.16E-02 | 18.43  | 19.73  | 3.50E-01 | 10.32   | 9.57  | 2.81E-01 | 11.15   | 27.99 | 6.90E-01 |
| cg09916577 | 18.96  | 8.72  | 2.96E-02 | 24.56  | 17.25 | 1.55E-01 | 37.60  | 18.67  | 4.40E-02 | 5.05    | 14.42 | 7.26E-01 | 16.39   | 21.69 | 4.50E-01 |
| cg22531183 | 20.37  | 9.36  | 2.96E-02 | -7.23  | 24.88 | 7.71E-01 | -26.92 | 64.62  | 6.77E-01 | 30.26   | 11.44 | 8.17E-03 | 10.05   | 22.88 | 6.61E-01 |
| cg15010184 | 16.62  | 7.64  | 2.96E-02 | 7.35   | 17.37 | 6.72E-01 | -30.89 | 62.96  | 6.24E-01 | 16.52   | 9.11  | 6.98E-02 | 45.48   | 25.66 | 7.64E-02 |
| cg14183184 | 33.62  | 15.46 | 2.96E-02 | 36.09  | 20.75 | 8.20E-02 | -21.86 | 44.00  | 6.19E-01 | 76.81   | 49.11 | 1.18E-01 | 38.99   | 32.76 | 2.34E-01 |
| cg12277532 | 24.71  | 11.36 | 2.96E-02 | 16.14  | 14.12 | 2.53E-01 | -13.68 | 61.95  | 8.25E-01 | -4.12   | 66.92 | 9.51E-01 | 51.15   | 21.10 | 1.53E-02 |
| cg12965599 | 9.79   | 4.50  | 2.97E-02 | 9.87   | 7.59  | 1.94E-01 | -2.74  | 13.05  | 8.34E-01 | 18.13   | 9.19  | 4.85E-02 | 7.92    | 8.37  | 3.44E-01 |
| cg22568673 | 72.38  | 33.28 | 2.97E-02 | 61.89  | 35.70 | 8.29E-02 | 226.73 | 84.12  | 7.03E-03 | 71.65   | 75.52 | 3.43E-01 | 23.91   | 43.75 | 5.85E-01 |
| cg08768904 | 17.07  | 7.85  | 2.97E-02 | 28.41  | 16.28 | 8.09E-02 | 31.03  | 15.62  | 4.69E-02 | 6.80    | 12.43 | 5.84E-01 | -0.75   | 23.02 | 9.74E-01 |
| cg24141036 | -30.12 | 13.85 | 2.97E-02 | -58.99 | 43.09 | 1.71E-01 | 54.44  | 144.93 | 7.07E-01 | -25.87  | 15.42 | 9.34E-02 | -45.26  | 48.75 | 3.53E-01 |
| cg07003920 | 33.76  | 15.52 | 2.97E-02 | 40.28  | 20.66 | 5.13E-02 | 35.76  | 61.26  | 5.59E-01 | 85.08   | 61.62 | 1.67E-01 | 10.82   | 27.98 | 6.99E-01 |
| cg00462559 | -12.63 | 5.81  | 2.97E-02 | -25.10 | 16.06 | 1.18E-01 | -37.57 | 28.01  | 1.80E-01 | -7.91   | 6.62  | 2.32E-01 | -29.23  | 24.51 | 2.33E-01 |
| cg13151006 | -9.71  | 4.47  | 2.97E-02 | -19.01 | 11.31 | 9.29E-02 | -13.40 | 17.35  | 4.40E-01 | -8.76   | 5.32  | 9.98E-02 | 4.22    | 16.51 | 7.98E-01 |
| cg21775463 | -11.11 | 5.11  | 2.97E-02 | -10.66 | 7.94  | 1.79E-01 | -13.26 | 11.51  | 2.49E-01 | 0.59    | 13.15 | 9.64E-01 | -17.51  | 10.46 | 9.43E-02 |
| cg06543101 | -15.62 | 7.18  | 2.97E-02 | -23.61 | 10.54 | 2.51E-02 | 1.24   | 16.50  | 9.40E-01 | -18.94  | 19.01 | 3.19E-01 | -10.75  | 15.95 | 5.00E-01 |
| cg12592635 | 24.71  | 11.36 | 2.97E-02 | 38.56  | 17.90 | 3.12E-02 | 6.50   | 38.43  | 8.66E-01 | 56.13   | 36.43 | 1.23E-01 | 7.62    | 17.70 | 6.67E-01 |
| cg12615150 | 17.89  | 8.23  | 2.97E-02 | 22.87  | 20.03 | 2.54E-01 | 41.32  | 33.03  | 2.11E-01 | 18.80   | 9.92  | 5.81E-02 | -18.05  | 28.90 | 5.32E-01 |
| cg06521597 | 40.21  | 18.50 | 2.97E-02 | 23.28  | 41.00 | 5.70E-01 | 6.18   | 105.41 | 9.53E-01 | 47.04   | 23.01 | 4.09E-02 | 40.92   | 53.54 | 4.45E-01 |
| cg03464573 | 19.05  | 8.76  | 2.97E-02 | 26.73  | 11.48 | 1.99E-02 | 32.89  | 32.64  | 3.14E-01 | -48.01  | 48.71 | 3.24E-01 | 8.52    | 15.64 | 5.86E-01 |
| cg00405043 | 21.08  | 9.69  | 2.97E-02 | 30.31  | 21.57 | 1.60E-01 | 24.81  | 19.26  | 1.98E-01 | 7.01    | 12.67 | 5.80E-01 | 61.26   | 29.59 | 3.85E-02 |
| cg20633317 | 21.18  | 9.74  | 2.97E-02 | 14.11  | 19.34 | 4.66E-01 | 45.44  | 29.43  | 1.23E-01 | 23.06   | 15.81 | 1.45E-01 | 15.03   | 19.21 | 4.34E-01 |
| cg07888967 | 14.52  | 6.68  | 2.97E-02 | 21.00  | 10.70 | 4.97E-02 | 5.75   | 16.32  | 7.24E-01 | 8.98    | 14.41 | 5.33E-01 | 15.09   | 13.96 | 2.80E-01 |
| cg12675906 | 5.28   | 2.43  | 2.97E-02 | 2.56   | 4.25  | 5.46E-01 | 0.06   | 5.72   | 9.91E-01 | 10.12   | 4.17  | 1.52E-02 | 6.48    | 6.20  | 2.96E-01 |
| cg00038298 | -14.48 | 6.66  | 2.97E-02 | -18.24 | 13.06 | 1.63E-01 | -17.34 | 22.07  | 4.32E-01 | -17.05  | 9.29  | 6.66E-02 | 4.45    | 18.14 | 8.06E-01 |
| cg18413900 | 10.56  | 4.86  | 2.97E-02 | 6.03   | 6.64  | 3.64E-01 | 24.75  | 12.26  | 4.36E-02 | 16.76   | 12.23 | 1.70E-01 | 5.37    | 12.53 | 6.68E-01 |
| cg07880727 | 7.06   | 3.25  | 2.97E-02 | 7.32   | 4.32  | 9.00E-02 | 16.86  | 9.41   | 7.31E-02 | 4.57    | 9.04  | 6.13E-01 | 1.72    | 7.53  | 8.19E-01 |
| cg06146607 | 24.76  | 11.39 | 2.97E-02 | 32.46  | 16.38 | 4.75E-02 | 27.95  | 29.81  | 3.48E-01 | 5.77    | 35.03 | 8.69E-01 | 16.51   | 22.12 | 4.55E-01 |
| cg17196051 | -10.66 | 4.90  | 2.97E-02 | -17.37 | 10.42 | 9.56E-02 | -1.05  | 20.10  | 9.58E-01 | -6.50   | 6.27  | 3.00E-01 | -25.97  | 15.00 | 8.35E-02 |
| cg13782937 | -7.96  | 3.66  | 2.97E-02 | -13.91 | 8.73  | 1.11E-01 | -5.69  | 14.16  | 6.88E-01 | -4.01   | 4.59  | 3.82E-01 | -21.34  | 10.53 | 4.28E-02 |
| cg11334644 | 9.11   | 4.19  | 2.97E-02 | 2.28   | 5.86  | 6.97E-01 | 15.66  | 10.39  | 1.32E-01 | 18.83   | 19.30 | 3.29E-01 | 16.18   | 7.94  | 4.16E-02 |
| cg21167532 | -77.99 | 35.88 | 2.97E-02 | -62.07 | 48.46 | 2.00E-01 | 167.62 | 160.90 | 2.98E-01 | -128.53 | 61.91 | 3.79E-02 | -102.83 | 86.57 | 2.35E-01 |
| cg02453146 | 19.18  | 8.82  | 2.97E-02 | 10.11  | 14.06 | 4.72E-01 | 5.63   | 35.88  | 8.75E-01 | 21.25   | 19.76 | 2.82E-01 | 30.66   | 14.99 | 4.08E-02 |

|            |        |       |          |        |       |          |        |        |          |        |       |          |         |       |          |
|------------|--------|-------|----------|--------|-------|----------|--------|--------|----------|--------|-------|----------|---------|-------|----------|
| cg00779056 | -25.42 | 11.70 | 2.97E-02 | -21.62 | 16.94 | 2.02E-01 | -37.83 | 47.11  | 4.22E-01 | -34.31 | 23.34 | 1.42E-01 | -19.80  | 25.49 | 4.37E-01 |
| cg24627517 | 46.44  | 21.37 | 2.97E-02 | 42.30  | 31.42 | 1.78E-01 | 133.48 | 88.73  | 1.33E-01 | 7.32   | 51.75 | 8.88E-01 | 57.88   | 38.43 | 1.32E-01 |
| cg19405718 | 39.66  | 18.24 | 2.97E-02 | 35.31  | 23.55 | 1.34E-01 | 52.39  | 83.70  | 5.31E-01 | 20.51  | 47.26 | 6.64E-01 | 63.55   | 40.46 | 1.16E-01 |
| cg08570521 | 15.09  | 6.94  | 2.97E-02 | 9.26   | 6.32  | 1.43E-01 | 50.83  | 86.09  | 5.55E-01 | 102.57 | 53.90 | 5.70E-02 | 19.22   | 8.64  | 2.60E-02 |
| cg07872373 | -5.99  | 2.76  | 2.97E-02 | -3.86  | 3.72  | 2.99E-01 | -5.78  | 5.70   | 3.11E-01 | 1.43   | 15.93 | 9.28E-01 | -13.69  | 6.37  | 3.16E-02 |
| cg03393754 | -16.47 | 7.58  | 2.97E-02 | -24.91 | 22.49 | 2.68E-01 | -11.28 | 32.66  | 7.30E-01 | -16.35 | 8.67  | 5.95E-02 | -8.04   | 28.85 | 7.81E-01 |
| cg25962829 | -13.88 | 6.39  | 2.97E-02 | -24.06 | 10.01 | 1.62E-02 | -7.71  | 12.38  | 5.33E-01 | -20.40 | 21.01 | 3.31E-01 | -0.61   | 13.21 | 9.63E-01 |
| cg15536401 | -8.60  | 3.96  | 2.97E-02 | -8.51  | 10.40 | 4.13E-01 | -2.11  | 19.90  | 9.15E-01 | -8.68  | 4.63  | 6.08E-02 | -11.07  | 13.53 | 4.14E-01 |
| cg05624376 | 5.22   | 2.40  | 2.97E-02 | 4.13   | 3.35  | 2.19E-01 | 7.22   | 4.80   | 1.32E-01 | 10.03  | 6.72  | 1.35E-01 | 0.15    | 7.25  | 9.83E-01 |
| cg19632236 | -32.46 | 14.94 | 2.98E-02 | -17.86 | 19.52 | 3.60E-01 | -18.72 | 61.90  | 7.62E-01 | -6.23  | 55.28 | 9.10E-01 | -72.23  | 28.06 | 1.01E-02 |
| cg26665246 | 28.33  | 13.04 | 2.98E-02 | 39.57  | 39.29 | 3.14E-01 | -36.69 | 118.59 | 7.57E-01 | 24.48  | 14.51 | 9.17E-02 | 65.98   | 49.02 | 1.78E-01 |
| cg23709430 | -12.97 | 5.97  | 2.98E-02 | -7.71  | 10.95 | 4.82E-01 | -14.62 | 13.48  | 2.78E-01 | -17.43 | 10.31 | 9.10E-02 | -11.50  | 14.39 | 4.24E-01 |
| cg08544192 | -9.61  | 4.42  | 2.98E-02 | -15.66 | 7.56  | 3.84E-02 | 10.35  | 11.75  | 3.78E-01 | -9.14  | 4.68  | 5.07E-02 | -16.46  | 9.74  | 9.09E-02 |
| cg12898275 | -24.58 | 11.31 | 2.98E-02 | -63.65 | 45.19 | 1.59E-01 | -53.64 | 160.38 | 7.38E-01 | -22.77 | 11.95 | 5.66E-02 | 2.38    | 59.52 | 9.68E-01 |
| cg18186672 | 12.80  | 5.89  | 2.98E-02 | 14.99  | 7.96  | 5.95E-02 | 12.59  | 14.72  | 3.92E-01 | 3.67   | 25.93 | 8.87E-01 | 9.89    | 11.99 | 4.10E-01 |
| cg00935108 | 7.84   | 3.61  | 2.98E-02 | 7.25   | 4.56  | 1.12E-01 | 18.47  | 7.44   | 1.30E-02 | 1.79   | 10.21 | 8.61E-01 | -0.35   | 8.85  | 9.68E-01 |
| cg12581592 | 17.42  | 8.01  | 2.98E-02 | 22.59  | 11.37 | 4.71E-02 | -6.36  | 22.38  | 7.76E-01 | 22.98  | 19.14 | 2.30E-01 | 14.95   | 17.93 | 4.04E-01 |
| cg20672477 | -8.01  | 3.68  | 2.98E-02 | -7.72  | 5.31  | 1.46E-01 | -5.40  | 8.80   | 5.39E-01 | -16.09 | 15.29 | 2.93E-01 | -8.43   | 6.89  | 2.21E-01 |
| cg19135706 | 26.28  | 12.10 | 2.98E-02 | 28.55  | 16.30 | 7.99E-02 | 22.15  | 66.35  | 7.38E-01 | 97.36  | 52.82 | 6.53E-02 | 13.00   | 20.05 | 5.17E-01 |
| cg22924015 | 19.39  | 8.92  | 2.98E-02 | 1.39   | 22.99 | 9.52E-01 | 51.41  | 49.22  | 2.96E-01 | 20.64  | 10.42 | 4.76E-02 | 28.38   | 31.01 | 3.60E-01 |
| cg07681935 | 10.67  | 4.91  | 2.98E-02 | 6.89   | 13.28 | 6.04E-01 | 13.57  | 26.84  | 6.13E-01 | 9.46   | 5.80  | 1.03E-01 | 22.14   | 14.62 | 1.30E-01 |
| cg14621254 | 7.53   | 3.46  | 2.98E-02 | 8.10   | 4.89  | 9.74E-02 | 14.38  | 7.77   | 6.44E-02 | -6.79  | 13.01 | 6.02E-01 | 4.75    | 7.26  | 5.12E-01 |
| cg26673073 | 49.63  | 22.84 | 2.98E-02 | 64.80  | 32.47 | 4.59E-02 | 1.86   | 65.75  | 9.77E-01 | -5.32  | 50.62 | 9.16E-01 | 101.89  | 53.72 | 5.79E-02 |
| cg20348746 | 6.09   | 2.80  | 2.98E-02 | 9.15   | 3.58  | 1.06E-02 | -1.41  | 5.05   | 7.79E-01 | 3.82   | 6.31  | 5.45E-01 | 11.17   | 5.79  | 5.37E-02 |
| cg14241370 | 8.26   | 3.80  | 2.98E-02 | 9.46   | 5.76  | 1.00E-01 | 19.90  | 9.71   | 4.05E-02 | 2.00   | 8.31  | 8.09E-01 | 3.31    | 8.48  | 6.97E-01 |
| cg06432479 | 31.42  | 14.46 | 2.98E-02 | 46.26  | 19.15 | 1.57E-02 | 41.55  | 49.12  | 3.98E-01 | 46.56  | 28.32 | 1.00E-01 | -10.76  | 26.58 | 6.86E-01 |
| cg04709931 | -60.89 | 28.03 | 2.98E-02 | -44.50 | 29.91 | 1.37E-01 | -91.43 | 105.52 | 3.86E-01 | 13.96  | 77.31 | 8.57E-01 | -144.51 | 58.72 | 1.39E-02 |
| cg03660603 | -10.35 | 4.76  | 2.98E-02 | -10.87 | 11.22 | 3.33E-01 | 0.40   | 20.90  | 9.85E-01 | -11.02 | 5.95  | 6.40E-02 | -10.59  | 13.34 | 4.28E-01 |
| cg14181409 | 6.53   | 3.01  | 2.98E-02 | 4.78   | 3.87  | 2.16E-01 | 14.05  | 5.29   | 7.86E-03 | -4.20  | 10.36 | 6.85E-01 | 4.30    | 6.67  | 5.19E-01 |
| cg11364645 | 46.82  | 21.55 | 2.98E-02 | 37.55  | 25.80 | 1.46E-01 | 44.86  | 121.12 | 7.11E-01 | 32.69  | 63.60 | 6.07E-01 | 99.14   | 54.60 | 6.94E-02 |
| cg10705503 | -21.86 | 10.06 | 2.98E-02 | -28.81 | 19.72 | 1.44E-01 | 7.25   | 35.70  | 8.39E-01 | -26.94 | 13.86 | 5.19E-02 | -5.56   | 27.53 | 8.40E-01 |
| cg17480641 | -15.75 | 7.25  | 2.98E-02 | -33.81 | 13.50 | 1.23E-02 | 19.52  | 25.46  | 4.43E-01 | -15.48 | 6.57  | 1.84E-02 | -8.33   | 16.26 | 6.09E-01 |
| cg17795258 | 16.32  | 7.51  | 2.98E-02 | 8.18   | 17.08 | 6.32E-01 | 10.62  | 35.21  | 7.63E-01 | 20.53  | 9.35  | 2.82E-02 | 8.75    | 22.08 | 6.92E-01 |
| cg27223543 | 20.60  | 9.48  | 2.98E-02 | 23.79  | 10.91 | 2.93E-02 | 2.30   | 44.17  | 9.59E-01 | 31.36  | 71.00 | 6.59E-01 | 10.92   | 22.25 | 6.24E-01 |
| cg05387519 | 17.41  | 8.01  | 2.98E-02 | 37.83  | 18.88 | 4.51E-02 | -6.13  | 24.66  | 8.04E-01 | 23.39  | 11.06 | 3.44E-02 | 3.93    | 14.47 | 7.86E-01 |



|            |        |       |          |        |       |          |        |        |          |         |       |          |        |       |          |
|------------|--------|-------|----------|--------|-------|----------|--------|--------|----------|---------|-------|----------|--------|-------|----------|
| cg09913171 | -28.68 | 13.20 | 2.98E-02 | -31.10 | 21.01 | 1.39E-01 | 6.19   | 52.43  | 9.06E-01 | -48.09  | 23.09 | 3.73E-02 | -5.02  | 28.47 | 8.60E-01 |
| cg19561908 | 10.81  | 4.98  | 2.98E-02 | 12.18  | 7.01  | 8.22E-02 | 4.22   | 10.19  | 6.79E-01 | 11.14   | 15.51 | 4.72E-01 | 16.33  | 12.69 | 1.98E-01 |
| cg07219227 | 8.85   | 4.08  | 2.98E-02 | 4.46   | 5.97  | 4.55E-01 | 17.59  | 10.09  | 8.12E-02 | 18.28   | 16.03 | 2.54E-01 | 8.88   | 7.36  | 2.28E-01 |
| cg10690277 | -18.56 | 8.54  | 2.98E-02 | -37.87 | 17.22 | 2.79E-02 | -46.62 | 37.77  | 2.17E-01 | -7.63   | 9.30  | 4.12E-01 | -27.56 | 24.71 | 2.65E-01 |
| cg09745873 | 22.00  | 10.13 | 2.98E-02 | 23.18  | 17.98 | 1.97E-01 | -3.23  | 21.85  | 8.83E-01 | 16.70   | 12.62 | 1.86E-01 | 54.72  | 20.83 | 8.63E-03 |
| cg22532907 | -13.81 | 6.36  | 2.98E-02 | -3.10  | 18.81 | 8.69E-01 | -6.20  | 28.36  | 8.27E-01 | -14.37  | 7.19  | 4.55E-02 | -36.23 | 27.83 | 1.93E-01 |
| cg15670706 | 21.01  | 9.67  | 2.99E-02 | 20.68  | 18.81 | 2.72E-01 | 44.93  | 19.96  | 2.44E-02 | 12.65   | 16.21 | 4.35E-01 | 3.41   | 25.39 | 8.93E-01 |
| cg07397612 | -11.17 | 5.14  | 2.99E-02 | -12.56 | 11.08 | 2.57E-01 | -3.82  | 24.78  | 8.77E-01 | -11.78  | 6.13  | 5.48E-02 | -0.63  | 26.05 | 9.81E-01 |
| cg16988970 | -8.61  | 3.96  | 2.99E-02 | -6.08  | 5.43  | 2.63E-01 | -5.01  | 8.44   | 5.53E-01 | -12.97  | 14.28 | 3.64E-01 | -19.28 | 9.63  | 4.53E-02 |
| cg23541422 | -21.26 | 9.79  | 2.99E-02 | -33.04 | 15.92 | 3.80E-02 | -4.07  | 25.60  | 8.74E-01 | -24.50  | 18.39 | 1.83E-01 | -6.45  | 22.27 | 7.72E-01 |
| cg07143418 | 20.94  | 9.64  | 2.99E-02 | 39.99  | 21.51 | 6.29E-02 | -0.71  | 30.54  | 9.81E-01 | 14.94   | 13.52 | 2.69E-01 | 28.19  | 22.07 | 2.01E-01 |
| cg08543015 | -8.17  | 3.76  | 2.99E-02 | -7.91  | 5.67  | 1.63E-01 | -15.94 | 8.08   | 4.86E-02 | -6.40   | 10.91 | 5.57E-01 | -2.13  | 7.94  | 7.89E-01 |
| cg17739428 | 25.38  | 11.68 | 2.99E-02 | 38.21  | 17.15 | 2.59E-02 | -15.67 | 32.89  | 6.34E-01 | 1.49    | 27.39 | 9.57E-01 | 38.01  | 19.71 | 5.38E-02 |
| cg07210454 | -10.04 | 4.62  | 2.99E-02 | -10.22 | 10.10 | 3.12E-01 | -12.28 | 15.15  | 4.18E-01 | -12.59  | 6.35  | 4.73E-02 | -0.44  | 11.33 | 9.69E-01 |
| cg08594651 | 6.55   | 3.02  | 2.99E-02 | 5.36   | 3.93  | 1.73E-01 | 12.25  | 6.97   | 7.87E-02 | 3.17    | 10.11 | 7.54E-01 | 6.06   | 8.20  | 4.60E-01 |
| cg16465012 | 19.47  | 8.97  | 2.99E-02 | 23.31  | 14.75 | 1.14E-01 | 15.98  | 16.63  | 3.37E-01 | -3.90   | 19.89 | 8.44E-01 | 48.09  | 23.00 | 3.66E-02 |
| cg10074813 | 15.94  | 7.34  | 2.99E-02 | 7.37   | 11.68 | 5.28E-01 | 21.80  | 13.46  | 1.05E-01 | 13.78   | 17.79 | 4.39E-01 | 30.48  | 19.75 | 1.23E-01 |
| cg01283096 | 13.80  | 6.35  | 2.99E-02 | 19.63  | 7.93  | 1.33E-02 | 14.30  | 11.87  | 2.28E-01 | 34.35   | 19.27 | 7.46E-02 | -1.21  | 9.84  | 9.02E-01 |
| cg18315831 | -8.92  | 4.11  | 2.99E-02 | -22.04 | 9.90  | 2.60E-02 | -0.63  | 17.35  | 9.71E-01 | -5.18   | 5.07  | 3.07E-01 | -14.59 | 12.05 | 2.26E-01 |
| cg18447727 | 20.41  | 9.40  | 2.99E-02 | 30.10  | 15.73 | 5.57E-02 | 0.56   | 27.98  | 9.84E-01 | 30.75   | 23.79 | 1.96E-01 | 12.84  | 15.37 | 4.03E-01 |
| cg11510999 | 6.24   | 2.88  | 2.99E-02 | 4.50   | 3.54  | 2.03E-01 | 12.81  | 6.40   | 4.53E-02 | 5.89    | 13.32 | 6.58E-01 | 4.49   | 9.59  | 6.39E-01 |
| cg27507681 | -8.60  | 3.96  | 2.99E-02 | -5.32  | 5.38  | 3.22E-01 | -10.04 | 9.87   | 3.09E-01 | -30.09  | 14.22 | 3.44E-02 | -8.05  | 8.46  | 3.41E-01 |
| cg16226962 | 13.72  | 6.32  | 2.99E-02 | 19.12  | 9.70  | 4.87E-02 | 9.60   | 15.94  | 5.47E-01 | 8.98    | 16.37 | 5.83E-01 | 10.23  | 12.15 | 4.00E-01 |
| cg09754110 | -58.57 | 26.97 | 2.99E-02 | -31.58 | 24.00 | 1.88E-01 | 49.03  | 79.66  | 5.38E-01 | -104.63 | 40.49 | 9.76E-03 | -98.87 | 42.95 | 2.14E-02 |
| cg19267259 | 33.10  | 15.24 | 2.99E-02 | 55.59  | 41.58 | 1.81E-01 | 1.88   | 159.09 | 9.91E-01 | 34.16   | 17.50 | 5.09E-02 | -3.05  | 48.67 | 9.50E-01 |
| cg14984246 | -28.98 | 13.35 | 2.99E-02 | -24.30 | 17.05 | 1.54E-01 | -42.99 | 45.75  | 3.47E-01 | 30.73   | 51.29 | 5.49E-01 | -53.37 | 27.56 | 5.28E-02 |
| cg05158197 | 18.25  | 8.40  | 2.99E-02 | 28.91  | 13.22 | 2.87E-02 | 6.43   | 32.76  | 8.44E-01 | 34.08   | 22.58 | 1.31E-01 | 3.63   | 13.43 | 7.87E-01 |
| cg10766103 | 33.11  | 15.25 | 2.99E-02 | 64.82  | 46.27 | 1.61E-01 | 93.78  | 188.07 | 6.18E-01 | 33.93   | 17.08 | 4.70E-02 | -17.74 | 51.25 | 7.29E-01 |
| cg06032735 | -8.89  | 4.09  | 2.99E-02 | -3.94  | 10.77 | 7.14E-01 | -7.30  | 14.57  | 6.16E-01 | -10.00  | 4.99  | 4.50E-02 | -9.79  | 12.78 | 4.43E-01 |
| cg05045969 | 17.56  | 8.09  | 2.99E-02 | 14.81  | 10.05 | 1.41E-01 | 49.08  | 33.97  | 1.49E-01 | -0.52   | 36.18 | 9.88E-01 | 21.19  | 16.30 | 1.94E-01 |
| cg18331412 | 8.16   | 3.76  | 2.99E-02 | 7.99   | 5.46  | 1.43E-01 | 17.35  | 8.50   | 4.12E-02 | 13.24   | 8.51  | 1.20E-01 | -1.25  | 6.83  | 8.55E-01 |
| cg23281012 | -29.27 | 13.48 | 2.99E-02 | -23.08 | 17.77 | 1.94E-01 | -44.10 | 39.50  | 2.64E-01 | -81.80  | 71.39 | 2.52E-01 | -29.13 | 25.85 | 2.60E-01 |
| cg18137704 | 12.46  | 5.74  | 2.99E-02 | 21.14  | 8.90  | 1.76E-02 | 2.54   | 14.52  | 8.61E-01 | 6.88    | 12.55 | 5.83E-01 | 8.40   | 12.26 | 4.93E-01 |
| cg07054668 | -11.29 | 5.20  | 2.99E-02 | -10.54 | 14.24 | 4.59E-01 | 23.91  | 38.43  | 5.34E-01 | -12.35  | 5.90  | 3.65E-02 | -10.21 | 19.25 | 5.96E-01 |
| cg05958702 | 21.38  | 9.85  | 2.99E-02 | 30.86  | 13.25 | 1.98E-02 | 21.32  | 30.80  | 4.89E-01 | 41.91   | 35.71 | 2.41E-01 | -3.86  | 18.97 | 8.39E-01 |

|            |        |       |          |        |       |          |        |        |          |        |       |          |        |       |          |
|------------|--------|-------|----------|--------|-------|----------|--------|--------|----------|--------|-------|----------|--------|-------|----------|
| cg02167203 | 3.51   | 1.61  | 2.99E-02 | 2.00   | 2.55  | 4.32E-01 | 4.64   | 4.22   | 2.72E-01 | 2.92   | 2.67  | 2.74E-01 | 11.11  | 5.51  | 4.36E-02 |
| cg06346667 | -14.72 | 6.78  | 2.99E-02 | -8.69  | 10.14 | 3.91E-01 | -24.36 | 12.10  | 4.40E-02 | 27.66  | 35.37 | 4.34E-01 | -20.82 | 15.11 | 1.68E-01 |
| cg11392776 | 18.63  | 8.58  | 2.99E-02 | 33.95  | 14.47 | 1.90E-02 | 29.47  | 15.53  | 5.76E-02 | 3.77   | 15.54 | 8.08E-01 | 0.11   | 18.80 | 9.95E-01 |
| cg03034864 | -38.96 | 17.95 | 2.99E-02 | -37.42 | 23.51 | 1.11E-01 | -76.18 | 82.29  | 3.55E-01 | 64.09  | 71.67 | 3.71E-01 | -57.16 | 32.39 | 7.76E-02 |
| cg19079000 | 44.56  | 20.53 | 2.99E-02 | 20.80  | 46.01 | 6.51E-01 | 180.81 | 210.26 | 3.90E-01 | 53.01  | 25.19 | 3.54E-02 | 27.52  | 57.44 | 6.32E-01 |
| cg26382697 | -8.45  | 3.89  | 2.99E-02 | -10.51 | 5.15  | 4.14E-02 | -11.86 | 8.89   | 1.82E-01 | -0.37  | 15.00 | 9.80E-01 | -0.88  | 9.45  | 9.25E-01 |
| cg04844714 | 27.58  | 12.70 | 2.99E-02 | 36.82  | 18.20 | 4.31E-02 | 31.21  | 43.99  | 4.78E-01 | 31.28  | 33.67 | 3.53E-01 | 9.02   | 23.70 | 7.03E-01 |
| cg12594793 | -9.82  | 4.53  | 2.99E-02 | -10.82 | 6.17  | 7.98E-02 | -4.38  | 13.45  | 7.44E-01 | -2.10  | 20.70 | 9.19E-01 | -11.32 | 8.24  | 1.69E-01 |
| cg15108590 | 15.98  | 7.36  | 3.00E-02 | 15.95  | 13.11 | 2.24E-01 | -8.08  | 21.30  | 7.04E-01 | 19.95  | 12.76 | 1.18E-01 | 22.69  | 15.27 | 1.37E-01 |
| cg01382671 | -15.13 | 6.97  | 3.00E-02 | -15.80 | 7.52  | 3.56E-02 | -6.98  | 38.29  | 8.55E-01 | -54.86 | 60.71 | 3.66E-01 | -6.34  | 22.79 | 7.81E-01 |
| cg20103758 | 23.23  | 10.70 | 3.00E-02 | 31.46  | 15.68 | 4.48E-02 | -7.52  | 30.22  | 8.03E-01 | 62.71  | 37.61 | 9.55E-02 | 13.54  | 18.71 | 4.69E-01 |
| cg17173896 | 7.72   | 3.56  | 3.00E-02 | 7.06   | 4.83  | 1.44E-01 | 15.31  | 8.28   | 6.44E-02 | 1.29   | 10.43 | 9.01E-01 | 5.84   | 9.01  | 5.17E-01 |
| cg00403579 | -18.81 | 8.67  | 3.00E-02 | -35.25 | 14.09 | 1.24E-02 | -9.10  | 20.22  | 6.53E-01 | -5.82  | 20.09 | 7.72E-01 | -10.82 | 17.27 | 5.31E-01 |
| cg23909633 | -9.88  | 4.55  | 3.00E-02 | 0.47   | 13.72 | 9.73E-01 | -15.13 | 26.33  | 5.66E-01 | -11.35 | 5.24  | 3.04E-02 | -8.73  | 14.06 | 5.35E-01 |
| cg22421859 | 23.62  | 10.88 | 3.00E-02 | 20.27  | 13.44 | 1.31E-01 | 20.19  | 61.98  | 7.45E-01 | 114.39 | 55.80 | 4.04E-02 | 19.44  | 20.76 | 3.49E-01 |
| cg26349048 | -7.40  | 3.41  | 3.00E-02 | -4.94  | 5.87  | 4.00E-01 | -5.51  | 9.08   | 5.44E-01 | -8.77  | 5.43  | 1.07E-01 | -11.69 | 9.49  | 2.18E-01 |
| cg01651364 | 51.23  | 23.60 | 3.00E-02 | 20.07  | 17.74 | 2.58E-01 | 55.33  | 79.49  | 4.86E-01 | 132.01 | 66.13 | 4.59E-02 | 78.27  | 35.78 | 2.87E-02 |
| cg06800849 | -11.07 | 5.10  | 3.00E-02 | -12.03 | 8.22  | 1.43E-01 | -10.94 | 17.83  | 5.39E-01 | -13.89 | 11.33 | 2.20E-01 | -8.26  | 8.87  | 3.52E-01 |
| cg19489885 | -16.00 | 7.37  | 3.00E-02 | -22.81 | 12.08 | 5.89E-02 | -2.86  | 15.30  | 8.51E-01 | -17.00 | 16.55 | 3.04E-01 | -17.58 | 16.61 | 2.90E-01 |
| cg24987622 | -11.76 | 5.42  | 3.00E-02 | -21.00 | 8.21  | 1.05E-02 | -2.24  | 12.14  | 8.53E-01 | -2.59  | 17.06 | 8.79E-01 | -7.20  | 10.53 | 4.94E-01 |
| cg08230648 | -9.88  | 4.55  | 3.00E-02 | -21.77 | 10.26 | 3.39E-02 | -3.10  | 11.19  | 7.82E-01 | -8.97  | 6.08  | 1.40E-01 | -0.69  | 16.42 | 9.67E-01 |
| cg15924691 | -11.32 | 5.21  | 3.00E-02 | -23.71 | 7.65  | 1.93E-03 | -7.72  | 10.32  | 4.55E-01 | -2.68  | 6.50  | 6.80E-01 | -11.99 | 10.80 | 2.67E-01 |
| cg10089801 | 9.19   | 4.24  | 3.00E-02 | 16.66  | 7.33  | 2.30E-02 | 5.57   | 9.10   | 5.41E-01 | 11.87  | 9.96  | 2.33E-01 | 1.03   | 8.17  | 8.99E-01 |
| cg06236559 | 10.43  | 4.80  | 3.00E-02 | 15.49  | 6.19  | 1.23E-02 | 3.66   | 14.81  | 8.05E-01 | 2.59   | 22.35 | 9.08E-01 | 2.41   | 9.68  | 8.04E-01 |
| cg06385152 | -27.10 | 12.49 | 3.00E-02 | -25.60 | 15.54 | 9.96E-02 | -53.16 | 37.51  | 1.56E-01 | -6.70  | 52.25 | 8.98E-01 | -23.07 | 28.91 | 4.25E-01 |
| cg01981445 | 22.02  | 10.15 | 3.00E-02 | 33.09  | 20.38 | 1.05E-01 | 7.73   | 17.55  | 6.60E-01 | 21.28  | 19.43 | 2.73E-01 | 37.40  | 26.62 | 1.60E-01 |
| cg14104327 | -10.74 | 4.95  | 3.00E-02 | -11.17 | 10.58 | 2.91E-01 | 5.87   | 15.78  | 7.10E-01 | -10.24 | 6.78  | 1.31E-01 | -22.76 | 12.78 | 7.49E-02 |
| cg14772118 | 19.18  | 8.84  | 3.00E-02 | 18.99  | 15.36 | 2.16E-01 | -8.01  | 32.62  | 8.06E-01 | 25.29  | 12.65 | 4.56E-02 | 10.54  | 26.95 | 6.96E-01 |
| cg10358981 | 13.72  | 6.32  | 3.00E-02 | 13.88  | 10.74 | 1.96E-01 | 16.67  | 17.97  | 3.54E-01 | 15.72  | 16.85 | 3.51E-01 | 11.91  | 10.14 | 2.40E-01 |
| cg02372613 | 23.13  | 10.66 | 3.00E-02 | 25.06  | 18.99 | 1.87E-01 | 35.29  | 21.93  | 1.07E-01 | 23.98  | 20.48 | 2.42E-01 | 2.29   | 25.24 | 9.28E-01 |
| cg01558785 | -14.89 | 6.86  | 3.00E-02 | -32.16 | 14.56 | 2.72E-02 | -19.71 | 14.97  | 1.88E-01 | -6.47  | 12.08 | 5.92E-01 | -6.20  | 13.87 | 6.55E-01 |
| cg13880467 | -12.53 | 5.77  | 3.00E-02 | -12.12 | 17.79 | 4.96E-01 | -10.63 | 27.35  | 6.98E-01 | -11.82 | 6.54  | 7.06E-02 | -22.26 | 21.81 | 3.07E-01 |
| cg06673273 | -9.84  | 4.54  | 3.00E-02 | -8.42  | 6.52  | 1.97E-01 | -4.06  | 10.58  | 7.01E-01 | -22.03 | 20.38 | 2.80E-01 | -13.91 | 8.54  | 1.03E-01 |
| cg23184252 | -24.32 | 11.21 | 3.00E-02 | -10.18 | 14.94 | 4.96E-01 | -24.24 | 43.61  | 5.78E-01 | -48.18 | 29.16 | 9.85E-02 | -44.10 | 23.68 | 6.25E-02 |
| cg12941312 | 12.19  | 5.62  | 3.00E-02 | 2.90   | 13.56 | 8.31E-01 | 3.57   | 16.63  | 8.30E-01 | 15.03  | 7.01  | 3.20E-02 | 22.55  | 20.87 | 2.80E-01 |

|            |        |       |          |        |       |          |         |        |          |        |       |          |        |       |          |
|------------|--------|-------|----------|--------|-------|----------|---------|--------|----------|--------|-------|----------|--------|-------|----------|
| cg26831566 | 14.63  | 6.74  | 3.00E-02 | -6.73  | 14.96 | 6.53E-01 | 6.54    | 25.72  | 7.99E-01 | 22.71  | 8.79  | 9.75E-03 | 15.62  | 18.07 | 3.87E-01 |
| cg02328545 | -26.27 | 12.11 | 3.00E-02 | -20.66 | 19.35 | 2.86E-01 | -0.50   | 80.08  | 9.95E-01 | -49.96 | 25.01 | 4.57E-02 | -18.39 | 20.43 | 3.68E-01 |
| cg15693299 | -7.71  | 3.55  | 3.00E-02 | -6.47  | 5.23  | 2.16E-01 | -13.30  | 8.68   | 1.26E-01 | -1.94  | 8.39  | 8.18E-01 | -11.24 | 8.14  | 1.67E-01 |
| cg00057240 | -6.63  | 3.05  | 3.00E-02 | -9.93  | 4.70  | 3.48E-02 | -4.78   | 7.15   | 5.04E-01 | -5.07  | 6.89  | 4.62E-01 | -2.87  | 6.85  | 6.75E-01 |
| cg14575656 | -10.02 | 4.62  | 3.00E-02 | -12.21 | 6.41  | 5.67E-02 | -7.45   | 11.89  | 5.31E-01 | -6.59  | 12.51 | 5.99E-01 | -8.56  | 10.50 | 4.15E-01 |
| cg02753203 | 12.12  | 5.59  | 3.00E-02 | 13.52  | 14.93 | 3.65E-01 | 15.76   | 13.72  | 2.51E-01 | 10.07  | 7.11  | 1.57E-01 | 18.25  | 20.18 | 3.66E-01 |
| cg04845185 | 12.82  | 5.91  | 3.00E-02 | 29.12  | 16.43 | 7.63E-02 | 17.03   | 15.50  | 2.72E-01 | 9.18   | 7.35  | 2.12E-01 | 8.17   | 21.15 | 6.99E-01 |
| cg15906733 | -7.26  | 3.35  | 3.00E-02 | -11.62 | 4.57  | 1.10E-02 | -1.95   | 7.64   | 7.98E-01 | -10.53 | 10.87 | 3.33E-01 | 1.91   | 7.93  | 8.09E-01 |
| cg05159279 | 15.16  | 6.99  | 3.00E-02 | -0.35  | 18.62 | 9.85E-01 | 26.16   | 22.86  | 2.52E-01 | 14.45  | 8.33  | 8.28E-02 | 41.57  | 27.94 | 1.37E-01 |
| cg22528556 | 18.50  | 8.53  | 3.00E-02 | 16.61  | 12.17 | 1.72E-01 | 36.60   | 15.86  | 2.10E-02 | -7.20  | 28.01 | 7.97E-01 | 3.40   | 23.91 | 8.87E-01 |
| cg22226568 | 20.39  | 9.40  | 3.01E-02 | 28.99  | 21.37 | 1.75E-01 | 8.88    | 24.65  | 7.19E-01 | 14.53  | 12.75 | 2.54E-01 | 47.46  | 27.38 | 8.30E-02 |
| cg25449924 | 15.02  | 6.93  | 3.01E-02 | 14.31  | 11.22 | 2.02E-01 | 21.09   | 12.77  | 9.85E-02 | -1.07  | 15.88 | 9.46E-01 | 26.50  | 18.86 | 1.60E-01 |
| cg06543087 | -23.37 | 10.77 | 3.01E-02 | -5.54  | 17.70 | 7.54E-01 | -58.52  | 192.00 | 7.61E-01 | -37.77 | 15.01 | 1.18E-02 | -15.01 | 32.30 | 6.42E-01 |
| cg21898299 | -12.31 | 5.67  | 3.01E-02 | -20.57 | 7.87  | 8.99E-03 | -10.99  | 13.65  | 4.21E-01 | -8.49  | 18.96 | 6.54E-01 | 3.96   | 11.91 | 7.40E-01 |
| cg25345520 | -11.07 | 5.10  | 3.01E-02 | -11.31 | 6.73  | 9.28E-02 | -15.33  | 13.44  | 2.54E-01 | -3.83  | 18.07 | 8.32E-01 | -10.20 | 11.38 | 3.70E-01 |
| cg11652496 | 22.83  | 10.52 | 3.01E-02 | 11.39  | 14.06 | 4.18E-01 | 55.54   | 20.95  | 8.01E-03 | 9.98   | 28.84 | 7.29E-01 | 19.37  | 23.14 | 4.03E-01 |
| cg14700820 | 26.10  | 12.03 | 3.01E-02 | 4.60   | 38.43 | 9.05E-01 | -71.22  | 170.10 | 6.75E-01 | 27.72  | 13.15 | 3.51E-02 | 46.74  | 49.08 | 3.41E-01 |
| cg24303806 | -14.73 | 6.79  | 3.01E-02 | -23.35 | 15.30 | 1.27E-01 | 8.19    | 29.49  | 7.81E-01 | -14.75 | 8.82  | 9.44E-02 | -11.60 | 17.16 | 4.99E-01 |
| cg03489427 | -9.17  | 4.23  | 3.01E-02 | -7.82  | 10.13 | 4.40E-01 | -6.02   | 18.70  | 7.48E-01 | -7.92  | 5.19  | 1.27E-01 | -20.19 | 12.68 | 1.11E-01 |
| cg05136452 | 19.48  | 8.98  | 3.01E-02 | 31.82  | 22.37 | 1.55E-01 | 86.00   | 79.25  | 2.78E-01 | 17.46  | 10.48 | 9.56E-02 | 4.54   | 29.76 | 8.79E-01 |
| cg27492860 | 24.29  | 11.20 | 3.01E-02 | 21.32  | 13.02 | 1.02E-01 | -31.55  | 55.48  | 5.70E-01 | 75.04  | 72.47 | 3.00E-01 | 40.89  | 25.29 | 1.06E-01 |
| cg00941010 | -13.63 | 6.28  | 3.01E-02 | -15.42 | 13.24 | 2.44E-01 | -9.16   | 17.18  | 5.94E-01 | -12.97 | 8.64  | 1.33E-01 | -18.53 | 18.82 | 3.25E-01 |
| cg12785983 | 14.79  | 6.82  | 3.01E-02 | 13.52  | 11.59 | 2.43E-01 | -0.87   | 19.80  | 9.65E-01 | 23.89  | 10.74 | 2.61E-02 | 4.38   | 18.80 | 8.16E-01 |
| cg16269532 | -16.10 | 7.42  | 3.01E-02 | -23.92 | 17.95 | 1.83E-01 | -51.97  | 35.70  | 1.45E-01 | -13.03 | 8.86  | 1.41E-01 | -7.34  | 25.64 | 7.75E-01 |
| cg21968169 | 22.49  | 10.37 | 3.01E-02 | 26.42  | 12.94 | 4.13E-02 | 17.79   | 33.45  | 5.95E-01 | -57.99 | 66.09 | 3.80E-01 | 22.11  | 21.26 | 2.99E-01 |
| cg24409649 | -30.51 | 14.07 | 3.01E-02 | -38.67 | 47.67 | 4.17E-01 | -50.81  | 201.64 | 8.01E-01 | -30.94 | 15.55 | 4.65E-02 | -17.46 | 47.10 | 7.11E-01 |
| cg26932614 | -11.64 | 5.37  | 3.01E-02 | -16.24 | 7.76  | 3.64E-02 | -13.62  | 11.00  | 2.15E-01 | 17.04  | 19.60 | 3.85E-01 | -9.14  | 11.76 | 4.37E-01 |
| cg15676015 | 27.15  | 12.52 | 3.01E-02 | 49.81  | 32.60 | 1.27E-01 | -126.47 | 148.19 | 3.93E-01 | 25.70  | 14.25 | 7.12E-02 | 11.78  | 46.31 | 7.99E-01 |
| cg05976325 | 24.72  | 11.40 | 3.01E-02 | 44.99  | 22.82 | 4.87E-02 | 49.28   | 42.56  | 2.47E-01 | 9.79   | 10.72 | 3.61E-01 | 51.36  | 31.75 | 1.06E-01 |
| cg00650006 | 32.24  | 14.87 | 3.01E-02 | 32.56  | 19.36 | 9.26E-02 | 52.50   | 47.84  | 2.72E-01 | 89.49  | 59.33 | 1.32E-01 | 9.39   | 29.65 | 7.51E-01 |
| cg03575292 | 15.59  | 7.19  | 3.01E-02 | 14.17  | 11.59 | 2.21E-01 | 9.67    | 13.98  | 4.89E-01 | 19.54  | 16.11 | 2.25E-01 | 24.35  | 18.47 | 1.88E-01 |
| cg11313468 | 4.64   | 2.14  | 3.01E-02 | 3.59   | 2.70  | 1.84E-01 | 12.23   | 5.24   | 1.96E-02 | 4.44   | 6.90  | 5.20E-01 | -0.64  | 6.39  | 9.20E-01 |
| cg00397871 | -6.36  | 2.93  | 3.01E-02 | -7.03  | 4.81  | 1.44E-01 | 4.07    | 7.21   | 5.73E-01 | -9.06  | 4.89  | 6.41E-02 | -11.33 | 9.17  | 2.17E-01 |
| cg02068989 | 28.89  | 13.32 | 3.01E-02 | 31.02  | 30.09 | 3.03E-01 | -10.00  | 41.06  | 8.07E-01 | 32.39  | 17.14 | 5.88E-02 | 45.34  | 43.30 | 2.95E-01 |
| cg09614932 | -7.92  | 3.65  | 3.01E-02 | -12.56 | 7.11  | 7.71E-02 | 0.81    | 10.15  | 9.36E-01 | -9.49  | 5.28  | 7.21E-02 | -1.26  | 10.23 | 9.02E-01 |

|            |        |       |          |        |       |          |         |        |          |        |       |          |        |       |          |
|------------|--------|-------|----------|--------|-------|----------|---------|--------|----------|--------|-------|----------|--------|-------|----------|
| cg01358740 | 38.93  | 17.95 | 3.01E-02 | 44.53  | 52.12 | 3.93E-01 | -150.63 | 277.72 | 5.88E-01 | 34.96  | 20.25 | 8.42E-02 | 74.55  | 59.47 | 2.10E-01 |
| cg24114708 | -10.93 | 5.04  | 3.01E-02 | 0.30   | 13.72 | 9.82E-01 | -8.74   | 23.32  | 7.08E-01 | -13.07 | 5.93  | 2.76E-02 | -11.65 | 16.20 | 4.72E-01 |
| cg26296364 | 21.01  | 9.69  | 3.01E-02 | 44.81  | 17.46 | 1.03E-02 | 14.29   | 31.69  | 6.52E-01 | 20.75  | 16.73 | 2.15E-01 | 2.31   | 16.23 | 8.87E-01 |
| cg17995967 | 30.17  | 13.91 | 3.01E-02 | 40.31  | 22.42 | 7.22E-02 | 28.70   | 47.21  | 5.43E-01 | 9.52   | 13.60 | 4.84E-01 | 70.01  | 29.12 | 1.62E-02 |
| cg11045198 | -11.23 | 5.18  | 3.01E-02 | -21.28 | 13.33 | 1.10E-01 | -13.45  | 18.94  | 4.78E-01 | -8.49  | 6.29  | 1.77E-01 | -12.96 | 16.61 | 4.35E-01 |
| cg00864530 | -8.15  | 3.76  | 3.01E-02 | -3.90  | 8.00  | 6.26E-01 | -1.65   | 13.12  | 9.00E-01 | -9.50  | 4.93  | 5.40E-02 | -14.22 | 11.12 | 2.01E-01 |
| cg06448961 | 12.56  | 5.80  | 3.01E-02 | 5.34   | 14.49 | 7.13E-01 | 34.55   | 54.61  | 5.27E-01 | 13.04  | 6.66  | 5.03E-02 | 20.20  | 21.60 | 3.50E-01 |
| cg06323049 | -9.38  | 4.33  | 3.01E-02 | -20.73 | 9.87  | 3.56E-02 | -7.50   | 16.08  | 6.41E-01 | -7.85  | 5.35  | 1.42E-01 | 3.59   | 15.26 | 8.14E-01 |
| cg10754002 | -12.13 | 5.59  | 3.02E-02 | -20.11 | 8.21  | 1.43E-02 | -1.03   | 13.48  | 9.39E-01 | -1.91  | 17.14 | 9.11E-01 | -9.37  | 11.05 | 3.96E-01 |
| cg00196407 | 11.67  | 5.38  | 3.02E-02 | 14.23  | 7.40  | 5.45E-02 | 27.66   | 13.51  | 4.06E-02 | 11.11  | 10.20 | 2.76E-01 | -3.82  | 11.07 | 7.30E-01 |
| cg02603192 | -56.09 | 25.87 | 3.02E-02 | -93.18 | 61.00 | 1.27E-01 | -158.96 | 316.77 | 6.16E-01 | -39.86 | 31.06 | 1.99E-01 | -88.58 | 74.71 | 2.36E-01 |
| cg01062930 | 20.96  | 9.67  | 3.02E-02 | 2.75   | 19.48 | 8.88E-01 | 0.57    | 26.77  | 9.83E-01 | 33.77  | 15.26 | 2.69E-02 | 29.97  | 20.51 | 1.44E-01 |
| cg04807025 | 14.77  | 6.81  | 3.02E-02 | -13.39 | 21.86 | 5.40E-01 | 32.47   | 39.59  | 4.12E-01 | 17.42  | 7.59  | 2.18E-02 | 15.92  | 26.11 | 5.42E-01 |
| cg17786516 | -7.63  | 3.52  | 3.02E-02 | -16.06 | 6.08  | 8.23E-03 | 2.60    | 7.33   | 7.22E-01 | -6.52  | 4.38  | 1.36E-01 | -9.05  | 7.86  | 2.49E-01 |
| cg22417420 | -42.92 | 19.80 | 3.02E-02 | -60.19 | 68.60 | 3.80E-01 | -167.28 | 118.56 | 1.58E-01 | -40.34 | 21.79 | 6.41E-02 | 1.19   | 79.02 | 9.88E-01 |
| cg00162046 | 21.86  | 10.08 | 3.02E-02 | 18.21  | 16.77 | 2.78E-01 | 19.18   | 20.10  | 3.40E-01 | 24.04  | 21.15 | 2.56E-01 | 31.23  | 25.23 | 2.16E-01 |
| cg13726218 | 13.89  | 6.41  | 3.02E-02 | 7.70   | 9.21  | 4.03E-01 | 20.63   | 16.82  | 2.20E-01 | -16.04 | 32.71 | 6.24E-01 | 23.40  | 11.11 | 3.51E-02 |
| cg19940065 | 21.03  | 9.70  | 3.02E-02 | -3.90  | 18.44 | 8.32E-01 | 18.46   | 47.54  | 6.98E-01 | 31.00  | 12.99 | 1.70E-02 | 32.75  | 27.57 | 2.35E-01 |
| cg25349990 | 6.57   | 3.03  | 3.02E-02 | 6.03   | 3.96  | 1.28E-01 | 9.46    | 6.76   | 1.62E-01 | 3.04   | 12.49 | 8.07E-01 | 6.22   | 7.73  | 4.21E-01 |
| cg02534450 | 8.77   | 4.04  | 3.02E-02 | 0.83   | 7.91  | 9.17E-01 | 12.92   | 10.64  | 2.25E-01 | 7.37   | 6.10  | 2.27E-01 | 22.29  | 10.29 | 3.02E-02 |
| cg12070987 | 7.63   | 3.52  | 3.02E-02 | 8.00   | 4.11  | 5.16E-02 | 7.49    | 9.61   | 4.36E-01 | 21.33  | 15.12 | 1.58E-01 | -5.22  | 12.67 | 6.80E-01 |
| cg20704450 | -4.43  | 2.04  | 3.02E-02 | -3.88  | 2.83  | 1.70E-01 | -1.54   | 5.10   | 7.63E-01 | -9.24  | 5.93  | 1.20E-01 | -5.35  | 4.59  | 2.44E-01 |
| cg06760467 | -12.15 | 5.60  | 3.02E-02 | -13.10 | 9.19  | 1.54E-01 | -10.89  | 12.38  | 3.79E-01 | -12.24 | 14.92 | 4.12E-01 | -11.77 | 10.56 | 2.65E-01 |
| cg08471972 | -12.86 | 5.93  | 3.02E-02 | -25.96 | 16.42 | 1.14E-01 | -0.50   | 24.78  | 9.84E-01 | -12.60 | 6.86  | 6.63E-02 | -0.28  | 23.35 | 9.90E-01 |
| cg03338754 | 9.52   | 4.39  | 3.02E-02 | 10.12  | 6.61  | 1.26E-01 | 16.29   | 10.93  | 1.36E-01 | 24.53  | 13.92 | 7.80E-02 | -0.06  | 8.04  | 9.94E-01 |
| cg23655039 | 10.82  | 4.99  | 3.02E-02 | 14.04  | 7.11  | 4.82E-02 | 14.26   | 12.51  | 2.54E-01 | 13.22  | 15.22 | 3.85E-01 | 0.83   | 10.20 | 9.35E-01 |
| cg10109111 | 7.59   | 3.50  | 3.02E-02 | 1.94   | 4.11  | 6.36E-01 | 12.10   | 5.18   | 1.95E-02 | 18.10  | 16.74 | 2.80E-01 | 14.89  | 10.45 | 1.54E-01 |
| cg25253677 | 18.03  | 8.32  | 3.02E-02 | 62.63  | 30.68 | 4.12E-02 | -16.91  | 85.41  | 8.43E-01 | 12.66  | 9.28  | 1.72E-01 | 30.07  | 24.72 | 2.24E-01 |
| cg16579770 | -15.29 | 7.06  | 3.02E-02 | -8.27  | 11.95 | 4.89E-01 | 6.36    | 27.06  | 8.14E-01 | -12.13 | 7.80  | 1.20E-01 | -38.37 | 14.07 | 6.39E-03 |
| cg04850211 | -4.13  | 1.91  | 3.02E-02 | -4.36  | 2.58  | 9.15E-02 | -5.96   | 4.59   | 1.94E-01 | -3.07  | 5.98  | 6.08E-01 | -2.31  | 4.48  | 6.07E-01 |
| cg11065154 | 7.18   | 3.31  | 3.02E-02 | 5.72   | 4.85  | 2.38E-01 | 1.36    | 7.60   | 8.58E-01 | 20.40  | 10.15 | 4.45E-02 | 8.74   | 6.79  | 1.98E-01 |
| cg14769589 | 18.31  | 8.45  | 3.02E-02 | 11.75  | 11.41 | 3.03E-01 | 18.52   | 22.75  | 4.16E-01 | 6.41   | 30.78 | 8.35E-01 | 37.11  | 17.33 | 3.23E-02 |
| cg04303509 | 6.30   | 2.91  | 3.02E-02 | 5.82   | 4.29  | 1.75E-01 | 9.07    | 11.06  | 4.12E-01 | 5.33   | 5.25  | 3.10E-01 | 8.33   | 7.18  | 2.46E-01 |
| cg02600625 | -12.99 | 6.00  | 3.02E-02 | -24.44 | 9.59  | 1.08E-02 | -18.69  | 13.64  | 1.71E-01 | -1.98  | 14.12 | 8.89E-01 | -2.33  | 10.51 | 8.24E-01 |
| cg17222941 | -26.21 | 12.10 | 3.02E-02 | -27.20 | 34.62 | 4.32E-01 | 55.40   | 158.78 | 7.27E-01 | -19.91 | 13.83 | 1.50E-01 | -74.74 | 37.02 | 4.35E-02 |

|            |        |       |          |        |       |          |        |        |          |        |       |          |        |       |          |
|------------|--------|-------|----------|--------|-------|----------|--------|--------|----------|--------|-------|----------|--------|-------|----------|
| cg14419581 | -22.36 | 10.32 | 3.02E-02 | -29.98 | 12.40 | 1.56E-02 | 4.57   | 89.02  | 9.59E-01 | -16.44 | 23.98 | 4.93E-01 | 12.80  | 31.29 | 6.82E-01 |
| cg16235962 | -8.78  | 4.05  | 3.02E-02 | -6.12  | 5.92  | 3.02E-01 | -13.52 | 9.93   | 1.74E-01 | -11.10 | 10.58 | 2.94E-01 | -9.32  | 8.66  | 2.82E-01 |
| cg01006102 | 26.10  | 12.05 | 3.03E-02 | 57.28  | 18.85 | 2.37E-03 | 17.61  | 20.33  | 3.86E-01 | 17.34  | 18.74 | 3.55E-01 | 0.26   | 27.12 | 9.92E-01 |
| cg06851207 | -3.70  | 1.71  | 3.03E-02 | -1.51  | 2.35  | 5.20E-01 | -6.09  | 3.72   | 1.02E-01 | -2.52  | 7.61  | 7.40E-01 | -7.11  | 3.73  | 5.64E-02 |
| cg02250431 | 8.67   | 4.00  | 3.03E-02 | 2.42   | 8.33  | 7.72E-01 | 17.78  | 13.00  | 1.71E-01 | 9.80   | 5.19  | 5.90E-02 | 7.50   | 14.12 | 5.96E-01 |
| cg18430314 | -35.88 | 16.56 | 3.03E-02 | -39.38 | 22.27 | 7.70E-02 | -83.53 | 47.41  | 7.81E-02 | -26.72 | 41.43 | 5.19E-01 | 2.18   | 40.75 | 9.57E-01 |
| cg01538166 | 13.20  | 6.09  | 3.03E-02 | 12.77  | 7.89  | 1.06E-01 | 29.75  | 11.51  | 9.72E-03 | 9.36   | 12.87 | 4.67E-01 | -3.83  | 13.76 | 7.81E-01 |
| cg26530485 | 10.27  | 4.74  | 3.03E-02 | 15.17  | 6.48  | 1.93E-02 | 8.30   | 13.43  | 5.36E-01 | 3.15   | 16.30 | 8.47E-01 | 3.34   | 9.37  | 7.21E-01 |
| cg04702527 | 9.63   | 4.44  | 3.03E-02 | 7.62   | 6.88  | 2.68E-01 | 8.91   | 9.66   | 3.56E-01 | 17.92  | 9.70  | 6.46E-02 | 4.98   | 11.08 | 6.53E-01 |
| cg06178299 | -12.39 | 5.72  | 3.03E-02 | -15.28 | 7.65  | 4.58E-02 | -8.16  | 17.30  | 6.37E-01 | -3.21  | 25.73 | 9.01E-01 | -9.91  | 10.76 | 3.57E-01 |
| cg27594176 | 22.73  | 10.49 | 3.03E-02 | 4.36   | 29.09 | 8.81E-01 | -56.84 | 148.72 | 7.02E-01 | 28.00  | 11.77 | 1.74E-02 | 2.98   | 39.32 | 9.40E-01 |
| cg08891605 | 9.43   | 4.35  | 3.03E-02 | 8.32   | 6.04  | 1.68E-01 | 13.58  | 8.81   | 1.23E-01 | 12.42  | 16.51 | 4.52E-01 | 5.56   | 10.64 | 6.01E-01 |
| cg00020405 | 10.52  | 4.85  | 3.03E-02 | 10.16  | 6.00  | 9.04E-02 | 27.09  | 16.31  | 9.67E-02 | 8.32   | 16.80 | 6.20E-01 | 4.46   | 11.64 | 7.01E-01 |
| cg11908155 | -11.52 | 5.32  | 3.03E-02 | -10.90 | 8.25  | 1.87E-01 | -2.60  | 11.99  | 8.29E-01 | -17.92 | 11.16 | 1.08E-01 | -14.94 | 13.21 | 2.58E-01 |
| cg15237047 | -50.38 | 23.26 | 3.03E-02 | -52.31 | 28.51 | 6.65E-02 | -62.02 | 82.08  | 4.50E-01 | 66.75  | 81.57 | 4.13E-01 | -92.61 | 55.93 | 9.77E-02 |
| cg02957270 | 8.79   | 4.06  | 3.03E-02 | 9.79   | 6.75  | 1.47E-01 | 4.86   | 9.29   | 6.00E-01 | 16.29  | 8.02  | 4.24E-02 | 0.86   | 9.23  | 9.26E-01 |
| cg24513522 | -11.04 | 5.10  | 3.03E-02 | -18.58 | 7.54  | 1.38E-02 | 0.80   | 10.52  | 9.40E-01 | -14.37 | 17.91 | 4.23E-01 | -6.95  | 10.68 | 5.15E-01 |
| cg24338483 | -40.27 | 18.59 | 3.03E-02 | -48.17 | 24.51 | 4.94E-02 | -32.32 | 87.08  | 7.10E-01 | 33.46  | 63.55 | 5.99E-01 | -47.49 | 34.27 | 1.66E-01 |
| cg15907819 | -10.37 | 4.79  | 3.03E-02 | -4.80  | 9.65  | 6.19E-01 | -10.93 | 17.99  | 5.44E-01 | -15.10 | 6.31  | 1.67E-02 | 2.51   | 14.57 | 8.63E-01 |
| cg16325174 | -10.18 | 4.70  | 3.03E-02 | -21.46 | 10.53 | 4.16E-02 | 1.22   | 12.28  | 9.21E-01 | -7.14  | 6.49  | 2.71E-01 | -18.02 | 13.03 | 1.67E-01 |
| cg26396370 | 4.21   | 1.94  | 3.03E-02 | 3.71   | 2.85  | 1.94E-01 | 6.59   | 4.40   | 1.34E-01 | 3.85   | 3.73  | 3.02E-01 | 2.29   | 7.42  | 7.58E-01 |
| cg07549208 | -19.77 | 9.12  | 3.03E-02 | -13.96 | 11.11 | 2.09E-01 | 0.72   | 16.53  | 9.65E-01 | -42.00 | 22.30 | 5.97E-02 | -38.60 | 17.68 | 2.90E-02 |
| cg01432087 | -13.76 | 6.35  | 3.03E-02 | -19.93 | 13.13 | 1.29E-01 | -27.40 | 27.95  | 3.27E-01 | -12.67 | 8.13  | 1.19E-01 | 0.48   | 19.66 | 9.81E-01 |
| cg13528513 | -5.90  | 2.73  | 3.03E-02 | -10.22 | 5.03  | 4.23E-02 | -5.42  | 7.30   | 4.58E-01 | -4.12  | 4.26  | 3.34E-01 | -2.95  | 6.84  | 6.66E-01 |
| cg04710402 | 23.33  | 10.77 | 3.03E-02 | 71.50  | 30.86 | 2.05E-02 | 14.10  | 63.80  | 8.25E-01 | 23.34  | 9.35  | 1.26E-02 | 2.10   | 19.69 | 9.15E-01 |
| cg18123048 | 44.48  | 20.53 | 3.03E-02 | 66.84  | 61.65 | 2.78E-01 | 62.84  | 214.78 | 7.70E-01 | 46.96  | 23.03 | 4.15E-02 | -9.73  | 70.37 | 8.90E-01 |
| cg17588400 | -13.70 | 6.33  | 3.03E-02 | 0.23   | 15.72 | 9.88E-01 | -10.75 | 20.39  | 5.98E-01 | -18.52 | 7.69  | 1.61E-02 | -2.75  | 24.78 | 9.12E-01 |
| cg17658854 | 10.39  | 4.79  | 3.03E-02 | 15.59  | 13.64 | 2.53E-01 | 25.84  | 20.96  | 2.18E-01 | 7.22   | 5.43  | 1.83E-01 | 33.68  | 22.94 | 1.42E-01 |
| cg13123826 | -14.30 | 6.60  | 3.03E-02 | -13.32 | 15.04 | 3.76E-01 | -9.54  | 21.90  | 6.63E-01 | -17.51 | 8.59  | 4.15E-02 | -4.21  | 18.54 | 8.20E-01 |
| cg02776448 | 15.22  | 7.03  | 3.03E-02 | 0.75   | 8.11  | 9.26E-01 | 21.13  | 11.80  | 7.33E-02 | 27.15  | 17.08 | 1.12E-01 | 24.94  | 11.70 | 3.30E-02 |
| cg27177296 | -8.19  | 3.78  | 3.03E-02 | -16.61 | 8.84  | 6.04E-02 | -7.09  | 18.67  | 7.04E-01 | -6.90  | 4.65  | 1.38E-01 | -2.67  | 11.13 | 8.11E-01 |
| cg17216080 | 9.76   | 4.50  | 3.03E-02 | 3.88   | 7.35  | 5.98E-01 | 17.56  | 9.42   | 6.24E-02 | 19.41  | 15.93 | 2.23E-01 | 8.66   | 8.02  | 2.80E-01 |
| cg16576575 | 9.11   | 4.21  | 3.03E-02 | 6.56   | 6.53  | 3.15E-01 | 10.60  | 8.44   | 2.09E-01 | 27.33  | 13.35 | 4.07E-02 | 4.39   | 8.62  | 6.10E-01 |
| cg15786205 | 13.17  | 6.08  | 3.03E-02 | 22.04  | 9.30  | 1.78E-02 | 6.48   | 16.83  | 7.00E-01 | 24.42  | 16.30 | 1.34E-01 | 0.31   | 10.32 | 9.76E-01 |
| cg23295629 | -9.12  | 4.21  | 3.03E-02 | -9.42  | 5.53  | 8.87E-02 | -7.02  | 10.71  | 5.12E-01 | 3.38   | 14.49 | 8.15E-01 | -15.81 | 9.90  | 1.10E-01 |

|            |        |       |          |        |       |          |         |        |          |        |       |          |        |       |          |
|------------|--------|-------|----------|--------|-------|----------|---------|--------|----------|--------|-------|----------|--------|-------|----------|
| cg18200827 | 39.29  | 18.14 | 3.03E-02 | 47.28  | 21.25 | 2.60E-02 | 35.78   | 91.10  | 6.94E-01 | 31.66  | 61.82 | 6.09E-01 | 4.65   | 47.60 | 9.22E-01 |
| cg23694261 | -25.66 | 11.85 | 3.03E-02 | -47.06 | 25.82 | 6.84E-02 | -4.83   | 166.54 | 9.77E-01 | -17.70 | 13.97 | 2.05E-01 | -46.23 | 46.60 | 3.21E-01 |
| cg18431951 | 9.36   | 4.32  | 3.03E-02 | 7.78   | 5.80  | 1.80E-01 | 14.55   | 9.22   | 1.15E-01 | 12.29  | 15.42 | 4.25E-01 | 6.02   | 11.31 | 5.95E-01 |
| cg18477666 | -13.66 | 6.31  | 3.03E-02 | -15.73 | 9.98  | 1.15E-01 | -12.04  | 14.59  | 4.09E-01 | -21.56 | 14.98 | 1.50E-01 | -5.51  | 12.96 | 6.70E-01 |
| cg17992056 | 11.99  | 5.53  | 3.03E-02 | 10.60  | 7.31  | 1.47E-01 | 17.42   | 15.26  | 2.54E-01 | 41.80  | 34.63 | 2.27E-01 | 9.46   | 10.66 | 3.75E-01 |
| cg05956058 | -11.23 | 5.19  | 3.03E-02 | -9.67  | 13.58 | 4.76E-01 | 17.29   | 23.49  | 4.62E-01 | -11.71 | 6.12  | 5.56E-02 | -25.96 | 17.63 | 1.41E-01 |
| cg07554408 | 10.49  | 4.84  | 3.03E-02 | 1.29   | 10.45 | 9.02E-01 | 18.44   | 15.11  | 2.22E-01 | 14.14  | 6.33  | 2.55E-02 | 0.40   | 15.56 | 9.80E-01 |
| cg24001556 | -23.92 | 11.05 | 3.03E-02 | -23.14 | 13.99 | 9.82E-02 | -17.89  | 25.77  | 4.88E-01 | -18.41 | 45.73 | 6.87E-01 | -38.08 | 30.06 | 2.05E-01 |
| cg13232118 | 22.26  | 10.28 | 3.03E-02 | 22.38  | 15.73 | 1.55E-01 | 23.95   | 26.03  | 3.58E-01 | 13.86  | 27.95 | 6.20E-01 | 25.18  | 19.36 | 1.93E-01 |
| cg13396068 | -11.48 | 5.30  | 3.04E-02 | -23.26 | 12.75 | 6.82E-02 | -16.07  | 16.11  | 3.19E-01 | -7.90  | 6.79  | 2.45E-01 | -8.28  | 15.98 | 6.04E-01 |
| cg11523191 | -28.69 | 13.25 | 3.04E-02 | -43.74 | 28.65 | 1.27E-01 | 20.00   | 60.69  | 7.42E-01 | -27.29 | 18.62 | 1.43E-01 | -27.88 | 27.49 | 3.10E-01 |
| cg14821245 | -8.40  | 3.88  | 3.04E-02 | -9.78  | 6.91  | 1.57E-01 | -12.64  | 10.27  | 2.18E-01 | -6.33  | 6.25  | 3.11E-01 | -6.87  | 9.81  | 4.84E-01 |
| cg25643595 | -14.64 | 6.76  | 3.04E-02 | -22.28 | 18.31 | 2.24E-01 | -90.43  | 78.43  | 2.49E-01 | -12.45 | 7.67  | 1.05E-01 | -15.95 | 24.16 | 5.09E-01 |
| cg15780870 | -61.02 | 28.18 | 3.04E-02 | -78.21 | 36.52 | 3.22E-02 | -23.78  | 202.23 | 9.06E-01 | 32.89  | 82.91 | 6.92E-01 | -65.98 | 54.28 | 2.24E-01 |
| cg20948740 | 10.28  | 4.75  | 3.04E-02 | 13.88  | 7.42  | 6.16E-02 | 21.13   | 12.34  | 8.69E-02 | 5.06   | 9.70  | 6.02E-01 | 1.32   | 10.51 | 9.00E-01 |
| cg00227781 | 21.27  | 9.83  | 3.04E-02 | 2.14   | 34.91 | 9.51E-01 | 97.91   | 102.54 | 3.40E-01 | 22.57  | 10.84 | 3.73E-02 | 18.45  | 32.79 | 5.74E-01 |
| cg03945895 | 16.50  | 7.62  | 3.04E-02 | 27.27  | 21.54 | 2.06E-01 | 26.09   | 31.28  | 4.04E-01 | 13.49  | 8.85  | 1.28E-01 | 20.82  | 28.03 | 4.58E-01 |
| cg01653132 | 14.30  | 6.61  | 3.04E-02 | 28.43  | 20.16 | 1.58E-01 | 25.50   | 22.73  | 2.62E-01 | 11.05  | 7.67  | 1.50E-01 | 13.62  | 25.72 | 5.97E-01 |
| cg26222247 | 16.77  | 7.74  | 3.04E-02 | 16.74  | 12.21 | 1.70E-01 | 28.18   | 23.53  | 2.31E-01 | 17.90  | 17.12 | 2.96E-01 | 11.64  | 14.51 | 4.23E-01 |
| cg14564616 | 20.85  | 9.63  | 3.04E-02 | 43.46  | 40.81 | 2.87E-01 | -153.53 | 178.96 | 3.91E-01 | 21.33  | 10.27 | 3.77E-02 | 1.67   | 38.85 | 9.66E-01 |
| cg25836232 | 6.36   | 2.94  | 3.04E-02 | 2.50   | 4.23  | 5.55E-01 | 10.19   | 6.94   | 1.42E-01 | 10.59  | 6.80  | 1.19E-01 | 8.90   | 7.52  | 2.37E-01 |
| cg26312191 | -7.66  | 3.54  | 3.04E-02 | -7.35  | 4.59  | 1.09E-01 | -10.56  | 8.38   | 2.07E-01 | -5.49  | 11.61 | 6.36E-01 | -6.64  | 9.61  | 4.89E-01 |
| cg21616142 | -18.56 | 8.57  | 3.04E-02 | -30.96 | 14.33 | 3.08E-02 | -6.22   | 19.04  | 7.44E-01 | -13.91 | 18.09 | 4.42E-01 | -14.40 | 18.46 | 4.35E-01 |
| cg18809377 | 19.08  | 8.81  | 3.04E-02 | 28.40  | 30.85 | 3.57E-01 | 104.25  | 141.68 | 4.62E-01 | 16.41  | 9.56  | 8.61E-02 | 37.22  | 34.57 | 2.82E-01 |
| cg00348222 | -12.29 | 5.68  | 3.04E-02 | -19.22 | 9.40  | 4.09E-02 | -7.56   | 11.27  | 5.02E-01 | -8.19  | 13.49 | 5.44E-01 | -9.36  | 12.57 | 4.56E-01 |
| cg16279544 | 19.05  | 8.80  | 3.04E-02 | 28.13  | 21.21 | 1.85E-01 | 25.99   | 36.45  | 4.76E-01 | 10.88  | 10.71 | 3.10E-01 | 56.95  | 28.73 | 4.74E-02 |
| cg01218206 | -9.14  | 4.22  | 3.04E-02 | -7.34  | 4.75  | 1.22E-01 | -15.03  | 8.43   | 7.47E-02 | 8.63   | 11.92 | 4.69E-01 | -17.09 | 8.41  | 4.21E-02 |
| cg26003360 | -14.26 | 6.59  | 3.04E-02 | -20.94 | 15.04 | 1.64E-01 | 9.14    | 30.31  | 7.63E-01 | -13.25 | 8.01  | 9.81E-02 | -20.08 | 22.48 | 3.72E-01 |
| cg09719124 | 17.23  | 7.96  | 3.04E-02 | 9.38   | 15.37 | 5.42E-01 | 14.89   | 33.93  | 6.61E-01 | 21.37  | 10.59 | 4.36E-02 | 16.34  | 23.82 | 4.93E-01 |
| cg16061528 | -16.21 | 7.49  | 3.04E-02 | -26.35 | 12.67 | 3.76E-02 | -1.63   | 15.06  | 9.14E-01 | 1.34   | 17.74 | 9.40E-01 | -27.30 | 13.52 | 4.34E-02 |
| cg04340918 | -8.41  | 3.88  | 3.04E-02 | -11.35 | 8.92  | 2.03E-01 | 1.28    | 13.28  | 9.23E-01 | -7.00  | 5.09  | 1.69E-01 | -16.15 | 10.33 | 1.18E-01 |
| cg23311258 | 7.78   | 3.59  | 3.04E-02 | 11.14  | 5.48  | 4.21E-02 | 16.65   | 9.26   | 7.21E-02 | 3.27   | 6.98  | 6.39E-01 | -2.50  | 9.15  | 7.85E-01 |
| cg03505501 | 10.01  | 4.62  | 3.04E-02 | 11.13  | 6.94  | 1.09E-01 | 14.94   | 14.26  | 2.95E-01 | 17.89  | 10.83 | 9.85E-02 | 0.87   | 8.93  | 9.23E-01 |
| cg18591727 | -10.16 | 4.69  | 3.04E-02 | -8.34  | 10.90 | 4.44E-01 | -30.32  | 13.59  | 2.57E-02 | -6.64  | 6.14  | 2.79E-01 | -10.07 | 14.09 | 4.75E-01 |
| cg04216051 | -18.42 | 8.51  | 3.04E-02 | -13.32 | 13.45 | 3.22E-01 | 8.11    | 21.96  | 7.12E-01 | -30.91 | 15.52 | 4.65E-02 | -33.63 | 22.03 | 1.27E-01 |

|            |        |       |          |        |       |          |        |        |          |        |       |          |         |       |          |
|------------|--------|-------|----------|--------|-------|----------|--------|--------|----------|--------|-------|----------|---------|-------|----------|
| cg07007080 | 27.87  | 12.87 | 3.04E-02 | 33.47  | 29.59 | 2.58E-01 | -77.38 | 63.69  | 2.24E-01 | 28.13  | 11.72 | 1.64E-02 | 57.80   | 38.97 | 1.38E-01 |
| cg01159980 | 12.74  | 5.88  | 3.04E-02 | 6.93   | 9.03  | 4.43E-01 | 25.83  | 11.66  | 2.68E-02 | 15.38  | 15.94 | 3.35E-01 | 6.10    | 13.68 | 6.56E-01 |
| cg13434396 | 10.01  | 4.62  | 3.04E-02 | 12.22  | 6.91  | 7.71E-02 | 14.58  | 12.05  | 2.26E-01 | 2.75   | 10.15 | 7.86E-01 | 9.21    | 10.40 | 3.75E-01 |
| cg11902728 | 12.23  | 5.65  | 3.04E-02 | 10.18  | 6.29  | 1.05E-01 | 19.10  | 8.99   | 3.37E-02 | 27.23  | 14.10 | 5.35E-02 | -7.28   | 12.98 | 5.75E-01 |
| cg18127410 | -16.59 | 7.66  | 3.04E-02 | -9.98  | 14.09 | 4.79E-01 | -40.16 | 54.76  | 4.63E-01 | -20.08 | 9.79  | 4.02E-02 | -7.53   | 28.67 | 7.93E-01 |
| cg25887236 | 18.62  | 8.60  | 3.04E-02 | 5.81   | 14.74 | 6.94E-01 | -8.53  | 36.57  | 8.16E-01 | 26.92  | 12.66 | 3.35E-02 | 32.82   | 22.75 | 1.49E-01 |
| cg26407930 | 9.50   | 4.39  | 3.04E-02 | 5.51   | 10.34 | 5.94E-01 | 8.70   | 13.76  | 5.27E-01 | 10.78  | 5.48  | 4.93E-02 | 9.30    | 15.88 | 5.58E-01 |
| cg15434211 | 11.05  | 5.10  | 3.04E-02 | 8.50   | 6.91  | 2.19E-01 | 16.23  | 11.68  | 1.65E-01 | 8.17   | 17.31 | 6.37E-01 | 14.69   | 12.11 | 2.25E-01 |
| cg03110368 | 15.83  | 7.31  | 3.04E-02 | 19.37  | 9.71  | 4.61E-02 | 15.19  | 29.80  | 6.10E-01 | -20.10 | 33.41 | 5.47E-01 | 15.06   | 12.83 | 2.40E-01 |
| cg23256951 | 7.05   | 3.26  | 3.04E-02 | 3.53   | 4.75  | 4.57E-01 | 14.75  | 6.47   | 2.26E-02 | 6.61   | 9.70  | 4.95E-01 | 5.49    | 8.01  | 4.93E-01 |
| cg17599586 | -38.97 | 18.01 | 3.04E-02 | -32.76 | 23.49 | 1.63E-01 | -49.74 | 70.35  | 4.80E-01 | -15.26 | 55.25 | 7.82E-01 | -61.66  | 36.71 | 9.30E-02 |
| cg25911482 | 15.53  | 7.17  | 3.04E-02 | 22.59  | 15.06 | 1.34E-01 | 1.61   | 14.24  | 9.10E-01 | 19.22  | 11.49 | 9.44E-02 | 19.31   | 19.95 | 3.33E-01 |
| cg21534423 | 14.32  | 6.62  | 3.04E-02 | 8.40   | 18.56 | 6.51E-01 | 50.93  | 35.50  | 1.51E-01 | 15.19  | 8.02  | 5.81E-02 | 7.24    | 16.73 | 6.65E-01 |
| cg18557185 | -7.65  | 3.53  | 3.04E-02 | -4.70  | 5.25  | 3.71E-01 | -8.52  | 8.60   | 3.22E-01 | 4.59   | 12.63 | 7.16E-01 | -14.79  | 6.45  | 2.18E-02 |
| cg17210004 | 8.01   | 3.70  | 3.05E-02 | 5.68   | 5.53  | 3.04E-01 | 3.12   | 7.76   | 6.88E-01 | 14.52  | 11.86 | 2.21E-01 | 14.65   | 7.74  | 5.85E-02 |
| cg00601368 | -8.64  | 3.99  | 3.05E-02 | -9.46  | 5.24  | 7.10E-02 | -13.85 | 9.40   | 1.41E-01 | -4.27  | 14.73 | 7.72E-01 | -2.02   | 9.82  | 8.37E-01 |
| cg05349077 | -62.79 | 29.01 | 3.05E-02 | -49.83 | 38.93 | 2.01E-01 | 17.64  | 126.53 | 8.89E-01 | -96.53 | 60.68 | 1.12E-01 | -85.51  | 71.77 | 2.33E-01 |
| cg20091384 | -9.47  | 4.38  | 3.05E-02 | -8.11  | 6.15  | 1.87E-01 | -5.93  | 9.58   | 5.36E-01 | -28.46 | 13.62 | 3.66E-02 | -6.54   | 10.29 | 5.25E-01 |
| cg01232748 | 7.87   | 3.64  | 3.05E-02 | 6.27   | 3.77  | 9.64E-02 | 17.99  | 7.02   | 1.04E-02 | 10.59  | 8.43  | 2.09E-01 | -2.32   | 7.82  | 7.67E-01 |
| cg15581944 | -9.55  | 4.41  | 3.05E-02 | 0.13   | 13.61 | 9.92E-01 | -9.54  | 10.21  | 3.50E-01 | -10.88 | 5.53  | 4.92E-02 | -12.04  | 16.59 | 4.68E-01 |
| cg24647108 | 15.65  | 7.23  | 3.05E-02 | 25.32  | 15.86 | 1.10E-01 | 4.12   | 18.58  | 8.24E-01 | 17.60  | 9.72  | 7.02E-02 | 0.24    | 24.45 | 9.92E-01 |
| cg07547403 | -14.51 | 6.70  | 3.05E-02 | 1.30   | 19.65 | 9.47E-01 | -18.25 | 25.39  | 4.72E-01 | -16.51 | 7.66  | 3.11E-02 | -15.44  | 30.67 | 6.15E-01 |
| cg22016716 | -16.25 | 7.51  | 3.05E-02 | -24.74 | 13.43 | 6.55E-02 | -3.04  | 23.07  | 8.95E-01 | -16.77 | 11.16 | 1.33E-01 | -4.74   | 20.86 | 8.20E-01 |
| cg18759693 | -58.15 | 26.87 | 3.05E-02 | -54.77 | 24.41 | 2.48E-02 | -73.60 | 155.97 | 6.37E-01 | 61.75  | 86.72 | 4.76E-01 | -128.35 | 59.36 | 3.06E-02 |
| cg12438044 | 9.17   | 4.24  | 3.05E-02 | 4.28   | 7.90  | 5.88E-01 | 5.73   | 7.90   | 4.68E-01 | 16.08  | 7.91  | 4.21E-02 | 12.15   | 11.38 | 2.86E-01 |
| cg01297721 | 10.72  | 4.96  | 3.05E-02 | 2.83   | 8.49  | 7.39E-01 | 19.92  | 12.00  | 9.70E-02 | 5.76   | 10.27 | 5.74E-01 | 19.62   | 9.80  | 4.52E-02 |
| cg15832405 | 24.03  | 11.11 | 3.05E-02 | 32.86  | 14.26 | 2.12E-02 | -8.55  | 43.62  | 8.45E-01 | -20.76 | 66.62 | 7.55E-01 | 17.37   | 20.25 | 3.91E-01 |
| cg09175289 | 15.32  | 7.08  | 3.05E-02 | 14.84  | 10.16 | 1.44E-01 | 15.53  | 15.45  | 3.15E-01 | 0.55   | 21.52 | 9.80E-01 | 24.46   | 15.99 | 1.26E-01 |
| cg12667732 | -13.51 | 6.24  | 3.05E-02 | -16.57 | 12.44 | 1.83E-01 | -21.40 | 16.94  | 2.06E-01 | -13.92 | 9.57  | 1.46E-01 | -2.71   | 14.44 | 8.51E-01 |
| cg14081270 | 7.25   | 3.35  | 3.05E-02 | 6.72   | 4.50  | 1.35E-01 | 12.50  | 8.37   | 1.35E-01 | 13.53  | 9.57  | 1.57E-01 | -0.89   | 8.34  | 9.15E-01 |
| cg13885451 | 36.40  | 16.82 | 3.05E-02 | 32.43  | 20.84 | 1.20E-01 | 84.44  | 54.22  | 1.19E-01 | 92.59  | 69.75 | 1.84E-01 | 9.05    | 38.22 | 8.13E-01 |
| cg17007896 | 6.94   | 3.21  | 3.05E-02 | 6.75   | 4.12  | 1.01E-01 | 18.46  | 9.72   | 5.74E-02 | 5.55   | 8.62  | 5.20E-01 | 0.50    | 8.34  | 9.52E-01 |
| cg27359566 | 15.56  | 7.19  | 3.05E-02 | 10.23  | 23.62 | 6.65E-01 | -30.99 | 110.44 | 7.79E-01 | 20.02  | 7.91  | 1.14E-02 | -23.51  | 25.96 | 3.65E-01 |
| cg04826772 | 42.29  | 19.55 | 3.05E-02 | 59.25  | 23.86 | 1.30E-02 | -25.09 | 77.24  | 7.45E-01 | 23.01  | 58.92 | 6.96E-01 | 10.38   | 49.64 | 8.34E-01 |
| cg21604856 | -10.71 | 4.95  | 3.05E-02 | -10.81 | 7.93  | 1.73E-01 | -6.51  | 10.59  | 5.39E-01 | -17.23 | 11.22 | 1.25E-01 | -8.74   | 11.14 | 4.33E-01 |

|            |        |       |          |        |       |          |         |        |          |        |       |          |        |       |          |
|------------|--------|-------|----------|--------|-------|----------|---------|--------|----------|--------|-------|----------|--------|-------|----------|
| cg22846388 | -14.86 | 6.87  | 3.05E-02 | -4.60  | 19.88 | 8.17E-01 | 17.31   | 31.61  | 5.84E-01 | -19.08 | 7.87  | 1.53E-02 | -8.26  | 25.57 | 7.47E-01 |
| cg14543152 | 12.76  | 5.90  | 3.05E-02 | 17.49  | 10.94 | 1.10E-01 | 6.45    | 14.01  | 6.45E-01 | 15.63  | 8.92  | 7.98E-02 | -3.06  | 19.09 | 8.73E-01 |
| cg03918306 | -33.44 | 15.46 | 3.05E-02 | -12.12 | 27.94 | 6.64E-01 | -388.85 | 234.16 | 9.68E-02 | -41.24 | 19.28 | 3.24E-02 | -34.09 | 51.33 | 5.07E-01 |
| cg15470750 | -44.75 | 20.69 | 3.05E-02 | -50.23 | 24.26 | 3.84E-02 | -80.02  | 133.14 | 5.48E-01 | 30.86  | 67.96 | 6.50E-01 | -58.69 | 52.39 | 2.63E-01 |
| cg10714639 | -10.88 | 5.03  | 3.05E-02 | -11.73 | 8.23  | 1.54E-01 | -9.06   | 10.77  | 4.00E-01 | -13.05 | 9.43  | 1.66E-01 | -6.54  | 14.32 | 6.48E-01 |
| cg09823095 | 21.65  | 10.01 | 3.05E-02 | 32.80  | 35.45 | 3.55E-01 | -128.87 | 152.77 | 3.99E-01 | 21.22  | 10.75 | 4.84E-02 | 24.16  | 44.82 | 5.90E-01 |
| cg03225002 | 32.74  | 15.14 | 3.05E-02 | 42.82  | 18.46 | 2.04E-02 | -67.16  | 73.87  | 3.63E-01 | 8.45   | 47.51 | 8.59E-01 | 32.13  | 35.22 | 3.62E-01 |
| cg17960629 | -9.33  | 4.31  | 3.05E-02 | -11.05 | 6.22  | 7.54E-02 | -15.42  | 10.54  | 1.43E-01 | -1.31  | 10.81 | 9.03E-01 | -6.34  | 9.82  | 5.18E-01 |
| cg24208375 | 23.42  | 10.83 | 3.05E-02 | 12.54  | 20.48 | 5.40E-01 | -57.23  | 78.62  | 4.67E-01 | 35.76  | 13.98 | 1.05E-02 | -4.30  | 33.91 | 8.99E-01 |
| cg14326354 | -11.57 | 5.35  | 3.05E-02 | -19.78 | 8.14  | 1.51E-02 | -6.15   | 12.13  | 6.12E-01 | -3.51  | 16.77 | 8.34E-01 | -5.42  | 10.25 | 5.97E-01 |
| cg14561276 | 16.61  | 7.68  | 3.05E-02 | 29.33  | 19.27 | 1.28E-01 | 19.46   | 23.80  | 4.14E-01 | 13.97  | 9.39  | 1.37E-01 | 8.60   | 29.35 | 7.69E-01 |
| cg26122963 | -12.75 | 5.89  | 3.05E-02 | -7.54  | 9.65  | 4.35E-01 | -12.45  | 15.03  | 4.08E-01 | -20.21 | 11.73 | 8.49E-02 | -13.24 | 12.55 | 2.91E-01 |
| cg26757711 | 13.39  | 6.19  | 3.05E-02 | 15.80  | 9.41  | 9.32E-02 | 22.89   | 17.93  | 2.02E-01 | 5.01   | 13.47 | 7.10E-01 | 11.67  | 12.69 | 3.58E-01 |
| cg10400362 | -30.28 | 14.00 | 3.05E-02 | -37.64 | 21.44 | 7.91E-02 | -14.44  | 35.96  | 6.88E-01 | -9.78  | 35.13 | 7.81E-01 | -39.85 | 27.28 | 1.44E-01 |
| cg21515023 | -41.86 | 19.35 | 3.05E-02 | -16.18 | 27.49 | 5.56E-01 | -21.30  | 64.08  | 7.40E-01 | -78.80 | 42.36 | 6.29E-02 | -75.54 | 42.77 | 7.74E-02 |
| cg07908000 | -17.83 | 8.24  | 3.05E-02 | -25.22 | 16.62 | 1.29E-01 | 1.16    | 26.78  | 9.66E-01 | -20.30 | 11.57 | 7.95E-02 | -9.48  | 21.13 | 6.54E-01 |
| cg17803175 | 11.48  | 5.31  | 3.05E-02 | 11.34  | 7.82  | 1.47E-01 | 15.95   | 14.89  | 2.84E-01 | 14.53  | 11.34 | 2.00E-01 | 5.41   | 12.08 | 6.54E-01 |
| cg07068756 | 15.17  | 7.01  | 3.05E-02 | 44.75  | 23.45 | 5.63E-02 | 12.52   | 38.09  | 7.42E-01 | 13.89  | 8.52  | 1.03E-01 | 6.70   | 15.70 | 6.69E-01 |
| cg05065948 | 6.86   | 3.17  | 3.05E-02 | 7.40   | 4.15  | 7.44E-02 | 12.41   | 8.46   | 1.42E-01 | 3.72   | 8.75  | 6.70E-01 | 2.10   | 8.37  | 8.02E-01 |
| cg06013494 | 8.46   | 3.91  | 3.05E-02 | 7.93   | 5.41  | 1.42E-01 | 12.98   | 8.73   | 1.37E-01 | 16.35  | 14.58 | 2.62E-01 | 2.60   | 8.64  | 7.63E-01 |
| cg14906638 | 17.37  | 8.03  | 3.05E-02 | 17.67  | 11.09 | 1.11E-01 | -11.18  | 37.97  | 7.68E-01 | 16.79  | 29.01 | 5.63E-01 | 20.67  | 13.50 | 1.26E-01 |
| cg09998861 | 7.82   | 3.62  | 3.05E-02 | 8.40   | 5.59  | 1.33E-01 | 11.68   | 8.13   | 1.51E-01 | 4.49   | 10.03 | 6.54E-01 | 5.56   | 7.17  | 4.38E-01 |
| cg08659047 | 22.96  | 10.62 | 3.05E-02 | 19.84  | 13.17 | 1.32E-01 | -3.99   | 30.70  | 8.97E-01 | 78.27  | 40.90 | 5.56E-02 | 32.33  | 26.29 | 2.19E-01 |
| cg22212250 | -7.30  | 3.38  | 3.05E-02 | -13.57 | 6.24  | 2.95E-02 | -15.01  | 11.25  | 1.82E-01 | -1.35  | 4.76  | 7.77E-01 | -9.39  | 8.27  | 2.56E-01 |
| cg13527921 | 7.98   | 3.69  | 3.06E-02 | 12.04  | 5.27  | 2.24E-02 | 13.41   | 8.70   | 1.23E-01 | 7.02   | 13.56 | 6.05E-01 | -1.91  | 6.86  | 7.81E-01 |
| cg21141445 | 16.33  | 7.55  | 3.06E-02 | 8.40   | 19.71 | 6.70E-01 | 4.69    | 29.94  | 8.75E-01 | 15.95  | 9.04  | 7.76E-02 | 39.94  | 24.91 | 1.09E-01 |
| cg06120235 | 7.71   | 3.56  | 3.06E-02 | 6.23   | 5.14  | 2.26E-01 | 14.75   | 6.99   | 3.48E-02 | -6.27  | 13.78 | 6.49E-01 | 6.75   | 8.14  | 4.07E-01 |
| cg27300887 | 23.11  | 10.68 | 3.06E-02 | 22.50  | 16.10 | 1.62E-01 | 19.43   | 20.76  | 3.49E-01 | 6.07   | 38.85 | 8.76E-01 | 34.65  | 22.83 | 1.29E-01 |
| cg13856126 | -15.62 | 7.22  | 3.06E-02 | -12.94 | 11.81 | 2.73E-01 | -16.23  | 14.77  | 2.72E-01 | -12.41 | 19.28 | 5.20E-01 | -20.94 | 14.56 | 1.50E-01 |
| cg09501687 | 15.48  | 7.16  | 3.06E-02 | 22.77  | 8.95  | 1.10E-02 | -0.48   | 22.30  | 9.83E-01 | -17.18 | 36.51 | 6.38E-01 | 7.47   | 15.28 | 6.25E-01 |
| cg22765178 | -8.69  | 4.02  | 3.06E-02 | -12.44 | 9.60  | 1.95E-01 | -29.85  | 24.71  | 2.27E-01 | -5.85  | 4.82  | 2.25E-01 | -16.08 | 12.53 | 1.99E-01 |
| cg22217449 | -7.94  | 3.67  | 3.06E-02 | -7.76  | 4.45  | 8.13E-02 | -17.98  | 7.73   | 1.99E-02 | 7.57   | 12.93 | 5.58E-01 | -4.29  | 7.68  | 5.76E-01 |
| cg00928751 | -12.14 | 5.61  | 3.06E-02 | -21.08 | 11.91 | 7.66E-02 | -13.87  | 16.19  | 3.92E-01 | -10.85 | 7.60  | 1.54E-01 | 1.13   | 16.74 | 9.46E-01 |
| cg09138267 | -33.70 | 15.58 | 3.06E-02 | -22.77 | 17.35 | 1.89E-01 | 28.81   | 49.48  | 5.60E-01 | -94.31 | 56.14 | 9.30E-02 | -50.77 | 20.64 | 1.39E-02 |
| cg19300502 | 6.52   | 3.01  | 3.06E-02 | 3.26   | 4.11  | 4.28E-01 | 9.22    | 6.33   | 1.45E-01 | 1.46   | 11.20 | 8.96E-01 | 15.64  | 7.43  | 3.52E-02 |



|            |        |       |          |        |       |          |         |        |          |        |       |          |        |       |          |
|------------|--------|-------|----------|--------|-------|----------|---------|--------|----------|--------|-------|----------|--------|-------|----------|
| cg00463011 | 22.98  | 10.62 | 3.06E-02 | 16.37  | 23.23 | 4.81E-01 | 62.25   | 45.80  | 1.74E-01 | 22.61  | 13.50 | 9.41E-02 | 18.72  | 30.93 | 5.45E-01 |
| cg00435576 | -9.23  | 4.27  | 3.06E-02 | -22.69 | 11.93 | 5.72E-02 | 4.20    | 14.81  | 7.77E-01 | -7.64  | 5.04  | 1.29E-01 | -16.61 | 15.94 | 2.97E-01 |
| cg07672688 | 7.12   | 3.29  | 3.06E-02 | 4.44   | 6.97  | 5.24E-01 | 4.30    | 10.82  | 6.91E-01 | 10.15  | 4.30  | 1.83E-02 | -2.25  | 10.55 | 8.31E-01 |
| cg00083790 | 8.05   | 3.72  | 3.06E-02 | 12.00  | 5.31  | 2.37E-02 | 5.68    | 7.14   | 4.27E-01 | -2.83  | 16.34 | 8.62E-01 | 4.06   | 8.69  | 6.40E-01 |
| cg16589260 | 5.77   | 2.67  | 3.06E-02 | 6.85   | 4.51  | 1.29E-01 | 2.85    | 5.28   | 5.89E-01 | 11.16  | 5.80  | 5.43E-02 | 1.54   | 6.24  | 8.05E-01 |
| cg22944461 | 22.32  | 10.32 | 3.06E-02 | -4.04  | 21.83 | 8.53E-01 | -15.30  | 44.86  | 7.33E-01 | 33.29  | 13.16 | 1.14E-02 | 32.79  | 31.37 | 2.96E-01 |
| cg13678070 | -33.46 | 15.47 | 3.06E-02 | -29.21 | 25.52 | 2.52E-01 | -40.52  | 123.29 | 7.42E-01 | -33.56 | 20.85 | 1.08E-01 | -54.67 | 60.25 | 3.64E-01 |
| cg13500072 | 11.63  | 5.38  | 3.06E-02 | 15.03  | 11.23 | 1.81E-01 | 17.01   | 14.05  | 2.26E-01 | 12.89  | 8.25  | 1.18E-01 | 1.03   | 12.05 | 9.32E-01 |
| cg18017926 | 16.32  | 7.55  | 3.06E-02 | 22.52  | 11.08 | 4.22E-02 | 14.52   | 20.61  | 4.81E-01 | 36.14  | 24.91 | 1.47E-01 | 1.99   | 13.54 | 8.83E-01 |
| cg27440002 | 17.22  | 7.97  | 3.06E-02 | 4.99   | 16.69 | 7.65E-01 | 33.52   | 34.69  | 3.34E-01 | 22.63  | 10.13 | 2.56E-02 | 3.33   | 24.98 | 8.94E-01 |
| cg01621145 | 20.19  | 9.34  | 3.06E-02 | 33.69  | 22.81 | 1.40E-01 | -2.09   | 38.03  | 9.56E-01 | 14.61  | 11.24 | 1.94E-01 | 56.11  | 32.68 | 8.60E-02 |
| cg22114568 | -11.39 | 5.27  | 3.06E-02 | -17.44 | 11.39 | 1.26E-01 | -19.44  | 23.64  | 4.11E-01 | -10.95 | 6.63  | 9.85E-02 | 2.06   | 16.22 | 8.99E-01 |
| cg25707669 | 32.59  | 15.07 | 3.06E-02 | 25.58  | 20.62 | 2.15E-01 | 76.88   | 48.29  | 1.11E-01 | 54.03  | 36.77 | 1.42E-01 | 11.75  | 33.68 | 7.27E-01 |
| cg23801544 | 14.30  | 6.61  | 3.06E-02 | 16.45  | 16.65 | 3.23E-01 | -4.21   | 29.46  | 8.86E-01 | 13.67  | 7.82  | 8.06E-02 | 27.84  | 23.81 | 2.42E-01 |
| cg18872881 | 21.56  | 9.97  | 3.06E-02 | 17.93  | 21.69 | 4.09E-01 | -17.91  | 47.53  | 7.06E-01 | 22.44  | 12.25 | 6.70E-02 | 44.85  | 34.74 | 1.97E-01 |
| cg15791815 | -7.07  | 3.27  | 3.06E-02 | -8.27  | 6.45  | 2.00E-01 | -1.36   | 10.48  | 8.97E-01 | -7.15  | 4.50  | 1.12E-01 | -8.74  | 9.45  | 3.55E-01 |
| cg18098065 | -13.33 | 6.16  | 3.06E-02 | -17.94 | 8.09  | 2.67E-02 | -5.94   | 16.88  | 7.25E-01 | -4.59  | 26.36 | 8.62E-01 | -8.10  | 12.79 | 5.27E-01 |
| cg11804725 | -10.88 | 5.03  | 3.06E-02 | -11.10 | 11.65 | 3.41E-01 | -12.67  | 9.92   | 2.02E-01 | -10.97 | 8.37  | 1.90E-01 | -8.13  | 11.41 | 4.76E-01 |
| cg00508855 | 23.03  | 10.65 | 3.06E-02 | 43.17  | 19.02 | 2.33E-02 | -0.32   | 33.91  | 9.93E-01 | 9.44   | 13.75 | 4.92E-01 | 46.77  | 28.15 | 9.67E-02 |
| cg24869601 | 8.97   | 4.15  | 3.06E-02 | 16.72  | 6.99  | 1.68E-02 | 5.59    | 10.73  | 6.03E-01 | 13.24  | 8.01  | 9.83E-02 | -0.05  | 6.76  | 9.95E-01 |
| cg04865715 | -34.19 | 15.81 | 3.06E-02 | -75.05 | 61.04 | 2.19E-01 | -289.67 | 176.82 | 1.01E-01 | -26.69 | 17.14 | 1.19E-01 | -55.71 | 58.19 | 3.38E-01 |
| cg03062196 | -8.34  | 3.86  | 3.06E-02 | -8.95  | 7.48  | 2.32E-01 | -1.11   | 14.03  | 9.37E-01 | -7.56  | 5.65  | 1.80E-01 | -12.22 | 8.80  | 1.65E-01 |
| cg12210255 | 9.29   | 4.30  | 3.06E-02 | 9.73   | 6.47  | 1.33E-01 | 12.40   | 10.37  | 2.32E-01 | 8.33   | 9.53  | 3.82E-01 | 6.40   | 10.07 | 5.25E-01 |
| cg24864413 | -17.04 | 7.88  | 3.06E-02 | -26.74 | 22.40 | 2.33E-01 | 23.31   | 29.32  | 4.27E-01 | -19.24 | 9.13  | 3.51E-02 | -18.22 | 32.31 | 5.73E-01 |
| cg17987968 | -11.62 | 5.37  | 3.06E-02 | -15.36 | 9.01  | 8.84E-02 | -9.60   | 12.13  | 4.29E-01 | -19.30 | 11.41 | 9.06E-02 | 0.05   | 11.30 | 9.96E-01 |
| cg00871358 | 18.20  | 8.42  | 3.06E-02 | 33.56  | 13.59 | 1.35E-02 | 12.12   | 23.61  | 6.08E-01 | 12.60  | 23.39 | 5.90E-01 | 5.97   | 14.05 | 6.71E-01 |
| cg21146184 | 12.74  | 5.90  | 3.06E-02 | 2.77   | 11.09 | 8.03E-01 | 23.32   | 16.98  | 1.70E-01 | 18.86  | 9.79  | 5.40E-02 | 9.87   | 12.19 | 4.18E-01 |
| cg26521402 | -12.37 | 5.72  | 3.06E-02 | -8.77  | 14.97 | 5.58E-01 | -10.97  | 22.07  | 6.19E-01 | -10.12 | 6.80  | 1.37E-01 | -40.32 | 20.34 | 4.74E-02 |
| cg00985040 | -7.01  | 3.24  | 3.06E-02 | -5.50  | 4.68  | 2.41E-01 | -4.85   | 7.54   | 5.20E-01 | 5.34   | 14.59 | 7.14E-01 | -13.05 | 6.06  | 3.11E-02 |
| cg26721193 | 15.28  | 7.07  | 3.07E-02 | 29.56  | 21.44 | 1.68E-01 | 39.64   | 47.45  | 4.04E-01 | 14.02  | 8.47  | 9.80E-02 | 8.26   | 16.99 | 6.27E-01 |
| cg19315854 | -12.69 | 5.87  | 3.07E-02 | -2.52  | 13.81 | 8.55E-01 | -34.54  | 19.45  | 7.58E-02 | -11.07 | 7.46  | 1.38E-01 | -20.41 | 17.72 | 2.50E-01 |
| cg26361041 | -8.75  | 4.05  | 3.07E-02 | -10.84 | 9.92  | 2.74E-01 | -6.42   | 20.84  | 7.58E-01 | -5.84  | 4.96  | 2.38E-01 | -21.62 | 11.23 | 5.42E-02 |
| cg01641432 | -18.58 | 8.59  | 3.07E-02 | -22.66 | 20.26 | 2.63E-01 | 23.83   | 40.68  | 5.58E-01 | -21.13 | 10.57 | 4.55E-02 | -13.91 | 25.47 | 5.85E-01 |
| cg11537479 | -12.26 | 5.67  | 3.07E-02 | -27.10 | 14.77 | 6.65E-02 | -18.54  | 17.25  | 2.82E-01 | -7.07  | 7.03  | 3.15E-01 | -17.76 | 18.60 | 3.40E-01 |
| cg20765716 | 5.26   | 2.43  | 3.07E-02 | 4.78   | 3.18  | 1.32E-01 | 10.97   | 5.18   | 3.43E-02 | 2.35   | 9.86  | 8.12E-01 | -0.82  | 6.70  | 9.03E-01 |

|            |        |       |          |        |       |          |         |       |          |        |       |          |        |       |          |
|------------|--------|-------|----------|--------|-------|----------|---------|-------|----------|--------|-------|----------|--------|-------|----------|
| cg09997082 | 6.50   | 3.01  | 3.07E-02 | 4.00   | 3.97  | 3.13E-01 | 15.81   | 6.50  | 1.50E-02 | 6.83   | 10.87 | 5.30E-01 | 2.17   | 8.20  | 7.91E-01 |
| cg00191178 | 9.69   | 4.48  | 3.07E-02 | 14.02  | 6.44  | 2.96E-02 | 13.77   | 12.35 | 2.65E-01 | 0.36   | 18.67 | 9.84E-01 | 3.28   | 7.85  | 6.76E-01 |
| cg09652533 | -13.33 | 6.17  | 3.07E-02 | -33.50 | 12.29 | 6.41E-03 | -3.10   | 9.72  | 7.50E-01 | -11.07 | 7.87  | 1.59E-01 | -11.23 | 17.32 | 5.17E-01 |
| cg21951459 | -13.02 | 6.02  | 3.07E-02 | -14.00 | 12.15 | 2.49E-01 | -24.23  | 16.61 | 1.45E-01 | -7.79  | 8.35  | 3.51E-01 | -22.90 | 18.86 | 2.25E-01 |
| cg13591352 | 12.85  | 5.95  | 3.07E-02 | 12.50  | 8.66  | 1.49E-01 | 19.30   | 14.39 | 1.80E-01 | 26.72  | 23.64 | 2.59E-01 | 6.69   | 10.96 | 5.42E-01 |
| cg12701768 | 15.35  | 7.10  | 3.07E-02 | 16.50  | 18.39 | 3.70E-01 | 18.06   | 20.77 | 3.84E-01 | 11.07  | 8.75  | 2.06E-01 | 46.39  | 25.93 | 7.36E-02 |
| cg00003091 | -38.69 | 17.90 | 3.07E-02 | -30.55 | 21.86 | 1.62E-01 | -109.29 | 88.06 | 2.15E-01 | -81.86 | 57.00 | 1.51E-01 | -29.63 | 41.10 | 4.71E-01 |
| cg02046881 | 20.20  | 9.35  | 3.07E-02 | 21.87  | 19.80 | 2.69E-01 | 57.10   | 22.42 | 1.09E-02 | 10.89  | 7.59  | 1.52E-01 | 16.75  | 28.41 | 5.56E-01 |
| cg13986536 | -14.37 | 6.65  | 3.07E-02 | -6.99  | 16.13 | 6.65E-01 | 35.15   | 37.92 | 3.54E-01 | -18.98 | 7.78  | 1.47E-02 | -5.72  | 25.30 | 8.21E-01 |
| cg23881299 | 26.09  | 12.07 | 3.07E-02 | 41.78  | 20.40 | 4.06E-02 | 54.32   | 21.80 | 1.27E-02 | 7.12   | 11.36 | 5.31E-01 | 15.58  | 26.52 | 5.57E-01 |
| cg21821231 | -33.73 | 15.61 | 3.07E-02 | -46.48 | 20.42 | 2.28E-02 | 1.77    | 64.87 | 9.78E-01 | -57.17 | 42.14 | 1.75E-01 | 5.30   | 33.23 | 8.73E-01 |
| cg10356187 | 20.87  | 9.66  | 3.07E-02 | 31.07  | 14.76 | 3.53E-02 | 19.84   | 23.73 | 4.03E-01 | -4.47  | 26.29 | 8.65E-01 | 17.99  | 18.53 | 3.32E-01 |
| cg01300405 | 26.38  | 12.21 | 3.07E-02 | 20.04  | 20.17 | 3.20E-01 | -55.62  | 89.34 | 5.34E-01 | 39.18  | 17.46 | 2.48E-02 | 7.32   | 34.35 | 8.31E-01 |
| cg05113898 | 17.09  | 7.91  | 3.07E-02 | 21.56  | 17.09 | 2.07E-01 | -8.14   | 27.79 | 7.70E-01 | 20.02  | 9.98  | 4.48E-02 | 7.27   | 28.61 | 7.99E-01 |
| cg00001582 | -27.28 | 12.62 | 3.07E-02 | -28.46 | 14.31 | 4.68E-02 | -52.66  | 50.42 | 2.96E-01 | 7.20   | 41.41 | 8.62E-01 | -37.64 | 48.87 | 4.41E-01 |
| cg02012771 | 17.68  | 8.18  | 3.07E-02 | 25.30  | 21.45 | 2.38E-01 | 22.36   | 28.92 | 4.39E-01 | 15.68  | 9.74  | 1.07E-01 | 16.68  | 31.24 | 5.93E-01 |
| cg02316713 | 10.19  | 4.71  | 3.07E-02 | 9.77   | 7.27  | 1.79E-01 | 10.33   | 8.57  | 2.28E-01 | 15.92  | 16.04 | 3.21E-01 | 8.29   | 10.81 | 4.43E-01 |
| cg25116789 | 21.17  | 9.80  | 3.07E-02 | 32.11  | 20.87 | 1.24E-01 | 35.59   | 46.15 | 4.41E-01 | 19.05  | 12.35 | 1.23E-01 | 4.73   | 30.28 | 8.76E-01 |
| cg26621127 | 22.13  | 10.24 | 3.07E-02 | 36.11  | 19.34 | 6.19E-02 | 35.05   | 37.97 | 3.56E-01 | 10.91  | 14.01 | 4.36E-01 | 32.24  | 30.54 | 2.91E-01 |
| cg06926703 | -6.05  | 2.80  | 3.07E-02 | -5.72  | 4.71  | 2.24E-01 | -4.96   | 8.75  | 5.71E-01 | -7.23  | 4.51  | 1.09E-01 | -4.60  | 7.01  | 5.12E-01 |
| cg22155039 | 8.29   | 3.83  | 3.07E-02 | 7.86   | 5.22  | 1.33E-01 | 9.00    | 8.17  | 2.70E-01 | 9.86   | 10.23 | 3.35E-01 | 6.80   | 12.10 | 5.74E-01 |
| cg02385153 | -14.09 | 6.52  | 3.07E-02 | -11.80 | 10.60 | 2.66E-01 | -12.94  | 17.01 | 4.47E-01 | -18.70 | 15.47 | 2.27E-01 | -14.81 | 11.96 | 2.16E-01 |
| cg20123649 | 20.27  | 9.38  | 3.07E-02 | 0.05   | 15.34 | 9.98E-01 | 33.27   | 15.58 | 3.27E-02 | 16.52  | 22.31 | 4.59E-01 | 40.00  | 22.76 | 7.89E-02 |
| cg08954863 | 19.88  | 9.20  | 3.07E-02 | 28.39  | 15.72 | 7.09E-02 | -3.72   | 46.77 | 9.37E-01 | 21.57  | 14.35 | 1.33E-01 | 6.88   | 20.22 | 7.34E-01 |
| cg04471045 | 18.74  | 8.67  | 3.07E-02 | 10.46  | 13.21 | 4.28E-01 | 3.68    | 18.23 | 8.40E-01 | 30.63  | 17.30 | 7.66E-02 | 48.78  | 24.18 | 4.37E-02 |
| cg09586183 | 14.44  | 6.68  | 3.07E-02 | 4.12   | 5.71  | 4.71E-01 | 27.82   | 9.32  | 2.84E-03 | 28.22  | 12.60 | 2.51E-02 | 5.81   | 9.22  | 5.28E-01 |
| cg14193097 | 17.78  | 8.23  | 3.07E-02 | 0.08   | 20.18 | 9.97E-01 | 1.18    | 24.66 | 9.62E-01 | 24.43  | 10.27 | 1.73E-02 | 24.22  | 29.05 | 4.04E-01 |
| cg12350762 | 27.87  | 12.90 | 3.07E-02 | 47.31  | 18.53 | 1.07E-02 | -18.00  | 42.53 | 6.72E-01 | 40.73  | 26.40 | 1.23E-01 | 7.53   | 21.32 | 7.24E-01 |
| cg10631530 | -24.31 | 11.25 | 3.07E-02 | -16.01 | 15.14 | 2.90E-01 | 0.52    | 38.39 | 9.89E-01 | -61.97 | 34.87 | 7.55E-02 | -35.18 | 22.18 | 1.13E-01 |
| cg25278343 | 21.44  | 9.92  | 3.07E-02 | 14.65  | 18.74 | 4.35E-01 | 32.94   | 18.10 | 6.87E-02 | 13.10  | 18.49 | 4.79E-01 | 27.87  | 27.40 | 3.09E-01 |
| cg19653594 | -7.08  | 3.28  | 3.07E-02 | -6.99  | 4.34  | 1.07E-01 | -11.81  | 6.89  | 8.67E-02 | -7.48  | 20.99 | 7.22E-01 | -1.37  | 7.73  | 8.60E-01 |
| cg14062119 | 10.30  | 4.77  | 3.08E-02 | 9.48   | 9.08  | 2.96E-01 | 23.31   | 11.77 | 4.76E-02 | 12.28  | 10.17 | 2.27E-01 | 3.41   | 8.17  | 6.76E-01 |
| cg22458693 | -13.17 | 6.10  | 3.08E-02 | -23.98 | 13.32 | 7.18E-02 | -26.29  | 17.38 | 1.30E-01 | -9.46  | 8.27  | 2.53E-01 | 1.85   | 17.32 | 9.15E-01 |
| cg19032532 | 12.93  | 5.99  | 3.08E-02 | 13.59  | 9.83  | 1.67E-01 | -2.33   | 11.29 | 8.37E-01 | 23.19  | 18.31 | 2.05E-01 | 24.07  | 11.67 | 3.92E-02 |
| cg14319235 | 11.84  | 5.48  | 3.08E-02 | 14.30  | 8.96  | 1.11E-01 | -7.54   | 14.92 | 6.13E-01 | 21.97  | 11.18 | 4.95E-02 | 8.90   | 10.93 | 4.16E-01 |

|               |        |       |          |        |       |          |         |        |          |        |       |          |         |       |          |
|---------------|--------|-------|----------|--------|-------|----------|---------|--------|----------|--------|-------|----------|---------|-------|----------|
| cg12981843    | 16.46  | 7.62  | 3.08E-02 | 3.17   | 13.17 | 8.10E-01 | 35.46   | 14.01  | 1.14E-02 | 16.33  | 16.56 | 3.24E-01 | 9.22    | 19.15 | 6.30E-01 |
| cg26389950    | 5.58   | 2.58  | 3.08E-02 | 5.73   | 4.24  | 1.77E-01 | 0.44    | 5.32   | 9.35E-01 | 10.31  | 5.40  | 5.62E-02 | 6.01    | 6.35  | 3.44E-01 |
| cg16056449    | 13.72  | 6.35  | 3.08E-02 | 15.59  | 12.84 | 2.25E-01 | -1.87   | 17.63  | 9.16E-01 | 17.60  | 9.11  | 5.35E-02 | 11.42   | 16.96 | 5.01E-01 |
| cg17510385    | -14.11 | 6.53  | 3.08E-02 | -15.80 | 8.25  | 5.54E-02 | 1.80    | 35.59  | 9.60E-01 | -38.98 | 22.95 | 8.94E-02 | -4.27   | 12.87 | 7.40E-01 |
| cg04945753    | -9.34  | 4.32  | 3.08E-02 | -12.75 | 7.59  | 9.32E-02 | -21.97  | 12.04  | 6.80E-02 | -1.92  | 7.25  | 7.91E-01 | -8.82   | 9.88  | 3.72E-01 |
| cg21871151    | -43.50 | 20.14 | 3.08E-02 | -50.96 | 28.34 | 7.22E-02 | 1.34    | 59.70  | 9.82E-01 | -76.94 | 47.02 | 1.02E-01 | -19.24  | 45.30 | 6.71E-01 |
| cg25778304    | -26.84 | 12.42 | 3.08E-02 | -26.69 | 18.08 | 1.40E-01 | -23.39  | 30.58  | 4.44E-01 | -33.76 | 34.09 | 3.22E-01 | -25.61  | 25.93 | 3.23E-01 |
| cg00797651    | 11.63  | 5.38  | 3.08E-02 | 9.68   | 7.97  | 2.25E-01 | 21.43   | 19.59  | 2.74E-01 | 22.07  | 15.33 | 1.50E-01 | 8.32    | 9.16  | 3.64E-01 |
| cg07230786    | -20.27 | 9.39  | 3.08E-02 | -13.29 | 16.78 | 4.28E-01 | -28.62  | 20.16  | 1.56E-01 | -31.16 | 18.86 | 9.84E-02 | -9.83   | 19.90 | 6.21E-01 |
| cg06353425    | 15.91  | 7.37  | 3.08E-02 | 9.12   | 16.74 | 5.86E-01 | 75.97   | 51.24  | 1.38E-01 | 17.25  | 9.02  | 5.58E-02 | 9.00    | 21.34 | 6.73E-01 |
| ch.7.246556R  | -10.58 | 4.90  | 3.08E-02 | -12.00 | 6.94  | 8.35E-02 | -8.85   | 9.65   | 3.59E-01 | -9.10  | 16.06 | 5.71E-01 | -9.73   | 12.61 | 4.41E-01 |
| cg13695746    | -13.87 | 6.42  | 3.08E-02 | -15.60 | 11.98 | 1.93E-01 | -27.38  | 16.98  | 1.07E-01 | -6.24  | 9.60  | 5.16E-01 | -21.95  | 18.39 | 2.33E-01 |
| cg14509153    | 11.45  | 5.30  | 3.08E-02 | 15.18  | 7.20  | 3.51E-02 | 10.72   | 13.48  | 4.26E-01 | 15.71  | 16.32 | 3.36E-01 | -0.47   | 11.93 | 9.68E-01 |
| cg13640626    | 25.56  | 11.83 | 3.08E-02 | 42.56  | 18.69 | 2.28E-02 | -18.99  | 36.08  | 5.99E-01 | 13.22  | 18.08 | 4.65E-01 | 44.16   | 27.47 | 1.08E-01 |
| cg17853575    | 54.08  | 25.04 | 3.08E-02 | 130.32 | 50.77 | 1.03E-02 | -104.17 | 240.43 | 6.65E-01 | 40.40  | 22.93 | 7.80E-02 | 9.67    | 70.44 | 8.91E-01 |
| cg09024124    | 22.56  | 10.44 | 3.08E-02 | 25.38  | 13.10 | 5.26E-02 | 77.60   | 37.50  | 3.85E-02 | 30.21  | 32.65 | 3.55E-01 | 5.70    | 15.37 | 7.11E-01 |
| cg06398881    | -15.57 | 7.21  | 3.08E-02 | -22.66 | 13.33 | 8.93E-02 | -14.83  | 17.56  | 3.98E-01 | -5.12  | 12.20 | 6.75E-01 | -24.61  | 16.58 | 1.38E-01 |
| cg03289906    | 9.78   | 4.53  | 3.08E-02 | 7.30   | 7.59  | 3.36E-01 | 9.89    | 9.77   | 3.11E-01 | 18.02  | 9.31  | 5.30E-02 | 4.13    | 10.30 | 6.88E-01 |
| cg14286320    | 16.21  | 7.51  | 3.08E-02 | 3.92   | 19.57 | 8.41E-01 | -21.98  | 36.85  | 5.51E-01 | 19.48  | 8.66  | 2.45E-02 | 31.71   | 30.62 | 3.00E-01 |
| cg26897717    | -49.17 | 22.77 | 3.08E-02 | -33.82 | 39.50 | 3.92E-01 | 138.42  | 197.66 | 4.84E-01 | -44.76 | 32.99 | 1.75E-01 | -103.52 | 53.94 | 5.49E-02 |
| cg16813864    | 18.58  | 8.61  | 3.08E-02 | 14.41  | 13.92 | 3.01E-01 | 33.63   | 15.90  | 3.45E-02 | 16.57  | 20.09 | 4.09E-01 | 1.33    | 22.87 | 9.53E-01 |
| cg12830119    | -18.59 | 8.61  | 3.08E-02 | -19.29 | 10.85 | 7.52E-02 | 5.16    | 29.33  | 8.60E-01 | -14.05 | 45.64 | 7.58E-01 | -25.68  | 17.28 | 1.37E-01 |
| cg11062079    | 8.72   | 4.04  | 3.08E-02 | 8.99   | 5.83  | 1.23E-01 | 13.73   | 9.05   | 1.29E-01 | 14.83  | 15.21 | 3.30E-01 | 2.48    | 8.10  | 7.59E-01 |
| cg17029690    | 27.11  | 12.56 | 3.08E-02 | 44.64  | 37.89 | 2.39E-01 | 59.16   | 181.28 | 7.44E-01 | 29.53  | 13.80 | 3.24E-02 | -43.03  | 52.02 | 4.08E-01 |
| cg05202389    | -12.11 | 5.61  | 3.08E-02 | -10.78 | 11.35 | 3.43E-01 | -13.55  | 13.35  | 3.10E-01 | -10.43 | 8.34  | 2.11E-01 | -18.59  | 15.70 | 2.36E-01 |
| cg21887097    | -7.56  | 3.50  | 3.09E-02 | -13.34 | 5.93  | 2.44E-02 | -6.98   | 9.30   | 4.53E-01 | -4.89  | 5.75  | 3.96E-01 | -0.76   | 9.38  | 9.35E-01 |
| cg12141662    | 18.02  | 8.35  | 3.09E-02 | 29.26  | 20.88 | 1.61E-01 | 6.95    | 26.79  | 7.95E-01 | 15.89  | 10.30 | 1.23E-01 | 25.76   | 28.31 | 3.63E-01 |
| cg04263316    | -16.69 | 7.73  | 3.09E-02 | -20.71 | 12.16 | 8.85E-02 | -10.94  | 15.80  | 4.89E-01 | -12.94 | 21.89 | 5.55E-01 | -17.62  | 16.05 | 2.72E-01 |
| cg12299795    | -15.18 | 7.03  | 3.09E-02 | -27.21 | 15.39 | 7.71E-02 | -7.23   | 15.40  | 6.39E-01 | -15.11 | 10.35 | 1.45E-01 | -8.44   | 20.15 | 6.75E-01 |
| cg05464534    | 32.00  | 14.82 | 3.09E-02 | 28.37  | 18.75 | 1.30E-01 | 12.62   | 50.19  | 8.02E-01 | 61.28  | 53.44 | 2.51E-01 | 40.07   | 32.27 | 2.14E-01 |
| ch.2.4817431F | -12.69 | 5.88  | 3.09E-02 | -18.04 | 11.91 | 1.30E-01 | 5.04    | 14.55  | 7.29E-01 | -23.70 | 11.40 | 3.77E-02 | -8.61   | 10.28 | 4.02E-01 |
| cg16829924    | -20.14 | 9.33  | 3.09E-02 | -12.61 | 10.66 | 2.37E-01 | -70.51  | 27.71  | 1.09E-02 | -21.39 | 20.10 | 2.87E-01 | -12.97  | 14.42 | 3.69E-01 |
| cg01034411    | -11.20 | 5.19  | 3.09E-02 | -26.67 | 8.64  | 2.02E-03 | -8.55   | 11.36  | 4.51E-01 | -5.49  | 5.02  | 2.74E-01 | -6.53   | 10.51 | 5.34E-01 |
| cg26401541    | -8.04  | 3.72  | 3.09E-02 | -17.67 | 6.50  | 6.60E-03 | -10.19  | 14.45  | 4.81E-01 | -3.16  | 4.02  | 4.31E-01 | -7.15   | 8.67  | 4.10E-01 |
| cg14609520    | -49.52 | 22.94 | 3.09E-02 | -54.55 | 25.99 | 3.59E-02 | -127.37 | 69.88  | 6.84E-02 | 42.69  | 64.54 | 5.08E-01 | -50.18  | 48.07 | 2.97E-01 |

|            |        |       |          |        |       |          |         |        |          |        |       |          |        |       |          |
|------------|--------|-------|----------|--------|-------|----------|---------|--------|----------|--------|-------|----------|--------|-------|----------|
| cg02524941 | -19.78 | 9.17  | 3.09E-02 | -11.92 | 16.20 | 4.62E-01 | -19.71  | 23.86  | 4.09E-01 | -24.90 | 14.85 | 9.37E-02 | -23.61 | 23.54 | 3.16E-01 |
| cg17879299 | 6.93   | 3.21  | 3.09E-02 | 3.19   | 4.55  | 4.84E-01 | 13.58   | 7.21   | 5.97E-02 | 2.84   | 8.57  | 7.40E-01 | 13.91  | 7.98  | 8.16E-02 |
| cg24119225 | -8.41  | 3.90  | 3.09E-02 | -3.51  | 4.33  | 4.17E-01 | -4.67   | 6.66   | 4.84E-01 | -21.90 | 7.09  | 2.01E-03 | -7.55  | 6.25  | 2.27E-01 |
| cg02396865 | -46.12 | 21.37 | 3.09E-02 | -41.78 | 27.92 | 1.35E-01 | -104.98 | 67.98  | 1.23E-01 | -29.86 | 64.58 | 6.44E-01 | -38.89 | 47.06 | 4.09E-01 |
| cg12441126 | 9.78   | 4.53  | 3.09E-02 | 6.28   | 6.61  | 3.42E-01 | 12.03   | 12.51  | 3.36E-01 | 21.12  | 22.85 | 3.55E-01 | 12.28  | 7.55  | 1.04E-01 |
| cg01058360 | 5.14   | 2.38  | 3.09E-02 | 3.77   | 3.08  | 2.20E-01 | 10.66   | 5.65   | 5.91E-02 | 5.94   | 7.14  | 4.05E-01 | 2.91   | 7.11  | 6.82E-01 |
| cg09965668 | -28.38 | 13.15 | 3.09E-02 | -20.07 | 17.86 | 2.61E-01 | -55.02  | 41.55  | 1.86E-01 | 9.92   | 36.68 | 7.87E-01 | -57.93 | 27.48 | 3.50E-02 |
| cg14040131 | -12.58 | 5.83  | 3.09E-02 | -14.88 | 7.06  | 3.50E-02 | -28.33  | 18.86  | 1.33E-01 | -28.21 | 16.08 | 7.94E-02 | -1.23  | 7.85  | 8.75E-01 |
| cg23859313 | -52.75 | 24.44 | 3.09E-02 | -76.39 | 20.27 | 1.65E-04 | 43.29   | 39.75  | 2.76E-01 | -89.63 | 37.17 | 1.59E-02 | -65.79 | 26.84 | 1.42E-02 |
| cg03210827 | 21.24  | 9.84  | 3.09E-02 | -6.50  | 22.75 | 7.75E-01 | 20.95   | 48.13  | 6.63E-01 | 29.96  | 11.94 | 1.21E-02 | 13.33  | 32.54 | 6.82E-01 |
| cg03253314 | 21.10  | 9.77  | 3.09E-02 | 1.48   | 21.53 | 9.45E-01 | -93.77  | 90.48  | 3.00E-01 | 28.05  | 11.67 | 1.62E-02 | 27.34  | 34.33 | 4.26E-01 |
| cg22700148 | -15.43 | 7.15  | 3.09E-02 | -17.81 | 11.72 | 1.29E-01 | -21.92  | 15.10  | 1.46E-01 | -21.30 | 18.83 | 2.58E-01 | -3.17  | 14.03 | 8.21E-01 |
| cg25735572 | -11.05 | 5.12  | 3.09E-02 | -16.84 | 7.46  | 2.40E-02 | 6.62    | 15.26  | 6.64E-01 | -7.19  | 12.21 | 5.56E-01 | -10.81 | 10.45 | 3.01E-01 |
| cg20626645 | -20.04 | 9.28  | 3.09E-02 | -4.77  | 33.42 | 8.86E-01 | -111.85 | 171.47 | 5.14E-01 | -20.17 | 10.14 | 4.68E-02 | -29.79 | 32.42 | 3.58E-01 |
| cg04208928 | 7.81   | 3.62  | 3.09E-02 | 8.69   | 8.04  | 2.80E-01 | 22.55   | 9.60   | 1.88E-02 | 4.04   | 4.92  | 4.11E-01 | 5.80   | 10.75 | 5.89E-01 |
| cg13855998 | 15.86  | 7.35  | 3.09E-02 | 16.23  | 15.58 | 2.97E-01 | 29.83   | 19.55  | 1.27E-01 | 18.02  | 10.02 | 7.20E-02 | -17.12 | 23.53 | 4.67E-01 |
| cg15718066 | 19.19  | 8.89  | 3.09E-02 | 26.76  | 16.27 | 1.00E-01 | 3.35    | 27.29  | 9.02E-01 | 20.91  | 15.40 | 1.75E-01 | 14.79  | 17.37 | 3.94E-01 |
| cg13704271 | -30.02 | 13.91 | 3.09E-02 | -27.83 | 17.88 | 1.20E-01 | -55.79  | 47.96  | 2.45E-01 | -22.04 | 73.95 | 7.66E-01 | -28.00 | 26.51 | 2.91E-01 |
| cg08956101 | -9.83  | 4.55  | 3.09E-02 | -13.01 | 10.45 | 2.13E-01 | -7.16   | 16.78  | 6.70E-01 | -6.59  | 5.82  | 2.57E-01 | -22.56 | 12.94 | 8.12E-02 |
| cg02711886 | 8.88   | 4.11  | 3.09E-02 | 7.92   | 5.50  | 1.50E-01 | 17.80   | 11.69  | 1.28E-01 | 11.56  | 9.36  | 2.17E-01 | 0.09   | 11.69 | 9.94E-01 |
| cg23142035 | -27.79 | 12.88 | 3.09E-02 | -29.18 | 15.23 | 5.53E-02 | -21.70  | 63.53  | 7.33E-01 | -35.28 | 83.18 | 6.71E-01 | -23.59 | 27.46 | 3.90E-01 |
| cg17174275 | -16.65 | 7.72  | 3.09E-02 | -28.39 | 10.41 | 6.38E-03 | 3.61    | 15.84  | 8.20E-01 | -4.94  | 18.07 | 7.84E-01 | -22.76 | 16.10 | 1.58E-01 |
| cg10792302 | 6.49   | 3.01  | 3.09E-02 | 4.17   | 4.90  | 3.94E-01 | 3.80    | 6.01   | 5.27E-01 | 9.00   | 6.81  | 1.86E-01 | 12.42  | 7.13  | 8.15E-02 |
| cg13449257 | -10.52 | 4.87  | 3.09E-02 | -16.09 | 7.79  | 3.89E-02 | -3.17   | 13.35  | 8.12E-01 | -7.91  | 11.44 | 4.89E-01 | -8.04  | 8.99  | 3.71E-01 |
| cg04251368 | 9.54   | 4.42  | 3.09E-02 | 7.54   | 8.87  | 3.95E-01 | 35.09   | 19.12  | 6.64E-02 | 11.32  | 6.46  | 7.99E-02 | 2.14   | 9.22  | 8.17E-01 |
| cg00078025 | -7.71  | 3.57  | 3.09E-02 | -12.30 | 4.63  | 7.85E-03 | 2.61    | 9.07   | 7.73E-01 | 2.28   | 14.90 | 8.79E-01 | -4.77  | 8.15  | 5.58E-01 |
| cg20874031 | -6.16  | 2.86  | 3.09E-02 | -7.05  | 4.66  | 1.30E-01 | -7.72   | 7.61   | 3.10E-01 | -4.66  | 4.76  | 3.28E-01 | -6.06  | 8.09  | 4.54E-01 |
| cg11703745 | 12.23  | 5.67  | 3.09E-02 | 12.26  | 7.99  | 1.25E-01 | 18.34   | 12.80  | 1.52E-01 | -0.78  | 19.05 | 9.67E-01 | 11.95  | 12.30 | 3.31E-01 |
| cg05023099 | 25.22  | 11.69 | 3.09E-02 | 48.12  | 20.79 | 2.06E-02 | 3.99    | 24.68  | 8.71E-01 | 11.50  | 15.34 | 4.53E-01 | 53.27  | 30.05 | 7.62E-02 |
| cg01601573 | -7.29  | 3.38  | 3.09E-02 | -4.99  | 4.22  | 2.38E-01 | 0.42    | 7.36   | 9.54E-01 | -17.44 | 9.92  | 7.86E-02 | -13.95 | 6.79  | 4.01E-02 |
| cg01789501 | -9.34  | 4.33  | 3.10E-02 | -8.87  | 8.81  | 3.14E-01 | -3.64   | 12.99  | 7.79E-01 | -12.72 | 6.15  | 3.85E-02 | -3.22  | 11.08 | 7.71E-01 |
| cg15114651 | -13.92 | 6.45  | 3.10E-02 | -12.65 | 9.96  | 2.04E-01 | -14.66  | 15.52  | 3.45E-01 | -25.02 | 17.62 | 1.56E-01 | -9.95  | 12.33 | 4.19E-01 |
| cg19814280 | 9.77   | 4.53  | 3.10E-02 | 10.39  | 9.98  | 2.98E-01 | -0.29   | 17.61  | 9.87E-01 | 10.79  | 5.76  | 6.11E-02 | 8.95   | 13.63 | 5.12E-01 |
| cg20500551 | 10.42  | 4.83  | 3.10E-02 | 28.19  | 11.43 | 1.36E-02 | 8.14    | 13.91  | 5.59E-01 | 5.78   | 6.27  | 3.57E-01 | 9.00   | 14.64 | 5.39E-01 |
| cg26348243 | -4.43  | 2.06  | 3.10E-02 | -4.19  | 2.48  | 9.05E-02 | -4.33   | 4.82   | 3.68E-01 | -8.88  | 9.24  | 3.37E-01 | -4.00  | 7.28  | 5.82E-01 |

|            |        |       |          |        |       |          |         |        |          |        |       |          |        |       |          |
|------------|--------|-------|----------|--------|-------|----------|---------|--------|----------|--------|-------|----------|--------|-------|----------|
| cg05886574 | -44.63 | 20.69 | 3.10E-02 | -36.37 | 24.16 | 1.32E-01 | -48.23  | 126.24 | 7.02E-01 | 10.56  | 93.72 | 9.10E-01 | -89.89 | 47.32 | 5.75E-02 |
| cg11787791 | 14.80  | 6.86  | 3.10E-02 | 7.14   | 10.28 | 4.87E-01 | 14.87   | 13.36  | 2.66E-01 | 17.03  | 18.68 | 3.62E-01 | 34.77  | 17.41 | 4.59E-02 |
| cg11619216 | 13.02  | 6.04  | 3.10E-02 | 10.48  | 8.60  | 2.23E-01 | 16.26   | 12.79  | 2.04E-01 | 10.96  | 18.22 | 5.47E-01 | 17.35  | 14.45 | 2.30E-01 |
| cg25747427 | -10.90 | 5.05  | 3.10E-02 | -14.00 | 7.03  | 4.63E-02 | -11.99  | 11.13  | 2.81E-01 | 7.26   | 18.68 | 6.98E-01 | -8.44  | 11.21 | 4.51E-01 |
| cg23318804 | -38.99 | 18.07 | 3.10E-02 | -86.00 | 54.35 | 1.14E-01 | -330.50 | 238.07 | 1.65E-01 | -32.85 | 20.22 | 1.04E-01 | -15.72 | 62.12 | 8.00E-01 |
| cg24673221 | -12.21 | 5.66  | 3.10E-02 | -12.69 | 13.47 | 3.46E-01 | 17.09   | 17.97  | 3.42E-01 | -16.58 | 9.49  | 8.06E-02 | -15.66 | 9.29  | 9.19E-02 |
| cg07697597 | 10.60  | 4.91  | 3.10E-02 | 16.38  | 7.99  | 4.04E-02 | 13.89   | 11.90  | 2.43E-01 | 7.28   | 11.45 | 5.25E-01 | 2.62   | 9.49  | 7.82E-01 |
| cg12594001 | 21.42  | 9.93  | 3.10E-02 | 14.53  | 16.46 | 3.77E-01 | 46.43   | 27.49  | 9.13E-02 | 29.43  | 18.95 | 1.20E-01 | 8.63   | 20.65 | 6.76E-01 |
| cg08951638 | 5.76   | 2.67  | 3.10E-02 | 3.77   | 3.69  | 3.06E-01 | 12.84   | 6.29   | 4.13E-02 | 5.82   | 6.98  | 4.04E-01 | 4.13   | 6.90  | 5.50E-01 |
| cg24553417 | 5.58   | 2.59  | 3.10E-02 | 5.35   | 3.26  | 1.01E-01 | 9.58    | 6.63   | 1.49E-01 | 4.66   | 7.65  | 5.42E-01 | 2.12   | 8.07  | 7.93E-01 |
| cg12627695 | 11.56  | 5.36  | 3.10E-02 | 18.23  | 9.19  | 4.72E-02 | 7.38    | 10.93  | 5.00E-01 | 14.36  | 13.40 | 2.84E-01 | 4.95   | 10.54 | 6.39E-01 |
| cg02417427 | 8.61   | 3.99  | 3.10E-02 | 8.27   | 5.30  | 1.19E-01 | 22.21   | 11.24  | 4.82E-02 | 9.72   | 10.38 | 3.49E-01 | -1.99  | 10.01 | 8.42E-01 |
| cg11592640 | -9.45  | 4.38  | 3.10E-02 | -7.61  | 11.09 | 4.93E-01 | 3.09    | 23.35  | 8.95E-01 | -9.10  | 5.25  | 8.28E-02 | -18.30 | 13.19 | 1.65E-01 |
| cg25153233 | -8.23  | 3.82  | 3.10E-02 | -12.77 | 5.74  | 2.62E-02 | -6.90   | 8.25   | 4.03E-01 | -5.40  | 10.76 | 6.16E-01 | -2.00  | 8.16  | 8.06E-01 |
| cg24339704 | 4.94   | 2.29  | 3.10E-02 | 4.14   | 2.72  | 1.28E-01 | 14.27   | 6.20   | 2.14E-02 | -0.60  | 9.23  | 9.49E-01 | 1.03   | 7.46  | 8.90E-01 |
| cg09441223 | -23.68 | 10.98 | 3.10E-02 | -30.73 | 14.32 | 3.19E-02 | 28.90   | 45.69  | 5.27E-01 | -41.19 | 30.66 | 1.79E-01 | -8.85  | 23.09 | 7.01E-01 |
| cg16576935 | -16.69 | 7.74  | 3.10E-02 | -38.35 | 17.12 | 2.51E-02 | -15.30  | 33.65  | 6.49E-01 | -9.11  | 9.74  | 3.49E-01 | -20.60 | 23.23 | 3.75E-01 |
| cg16375358 | -10.83 | 5.02  | 3.10E-02 | -8.15  | 7.98  | 3.07E-01 | -6.28   | 11.06  | 5.70E-01 | -18.46 | 12.28 | 1.33E-01 | -13.98 | 10.48 | 1.82E-01 |
| cg07840318 | 6.98   | 3.24  | 3.10E-02 | 6.23   | 4.31  | 1.48E-01 | -2.39   | 7.85   | 7.61E-01 | 18.10  | 8.74  | 3.85E-02 | 9.11   | 6.99  | 1.93E-01 |
| cg17626301 | -6.20  | 2.87  | 3.11E-02 | -3.89  | 4.24  | 3.59E-01 | -13.47  | 7.28   | 6.44E-02 | -5.64  | 6.18  | 3.61E-01 | -6.50  | 7.03  | 3.55E-01 |
| cg18733967 | -17.02 | 7.89  | 3.11E-02 | -19.62 | 13.38 | 1.43E-01 | 8.56    | 18.55  | 6.45E-01 | -20.94 | 16.59 | 2.07E-01 | -28.56 | 15.93 | 7.31E-02 |
| cg21913528 | -8.26  | 3.83  | 3.11E-02 | -5.06  | 6.74  | 4.53E-01 | -16.09  | 14.07  | 2.53E-01 | -8.91  | 5.59  | 1.11E-01 | -9.43  | 10.53 | 3.71E-01 |
| cg09967877 | 35.96  | 16.68 | 3.11E-02 | -11.40 | 44.90 | 8.00E-01 | 69.03   | 272.80 | 8.00E-01 | 48.05  | 19.13 | 1.20E-02 | 7.60   | 53.24 | 8.86E-01 |
| cg04317051 | 15.20  | 7.05  | 3.11E-02 | 3.59   | 15.53 | 8.17E-01 | 42.43   | 28.05  | 1.30E-01 | 17.51  | 8.72  | 4.46E-02 | 4.34   | 25.36 | 8.64E-01 |
| cg05176131 | 34.06  | 15.80 | 3.11E-02 | 41.01  | 23.27 | 7.80E-02 | -27.84  | 50.23  | 5.79E-01 | 20.89  | 16.67 | 2.10E-01 | 78.98  | 30.59 | 9.82E-03 |
| cg03503046 | -9.47  | 4.39  | 3.11E-02 | -20.60 | 5.78  | 3.63E-04 | -3.44   | 8.10   | 6.71E-01 | -6.07  | 5.64  | 2.82E-01 | -3.93  | 8.23  | 6.33E-01 |
| cg08393660 | 14.38  | 6.67  | 3.11E-02 | 3.36   | 11.11 | 7.62E-01 | 18.92   | 21.57  | 3.81E-01 | 19.30  | 10.42 | 6.41E-02 | 25.64  | 18.16 | 1.58E-01 |
| cg02232840 | -12.55 | 5.82  | 3.11E-02 | -16.82 | 18.37 | 3.60E-01 | -11.91  | 32.90  | 7.17E-01 | -12.14 | 6.41  | 5.83E-02 | -11.00 | 27.90 | 6.93E-01 |
| cg06920324 | 18.33  | 8.50  | 3.11E-02 | 14.28  | 16.96 | 4.00E-01 | 0.56    | 28.05  | 9.84E-01 | 18.58  | 11.66 | 1.11E-01 | 38.43  | 24.05 | 1.10E-01 |
| cg00812438 | 10.38  | 4.82  | 3.11E-02 | 11.33  | 9.66  | 2.41E-01 | 4.96    | 13.00  | 7.03E-01 | 20.28  | 8.87  | 2.22E-02 | 2.85   | 8.52  | 7.38E-01 |
| cg25535999 | -15.46 | 7.17  | 3.11E-02 | 1.82   | 15.11 | 9.04E-01 | -18.76  | 20.18  | 3.53E-01 | -18.05 | 9.76  | 6.44E-02 | -34.68 | 21.78 | 1.11E-01 |
| cg05190718 | -10.93 | 5.07  | 3.11E-02 | -18.67 | 7.98  | 1.93E-02 | -2.57   | 10.44  | 8.06E-01 | 0.12   | 10.33 | 9.91E-01 | -18.89 | 11.19 | 9.14E-02 |
| cg20013286 | 27.74  | 12.87 | 3.11E-02 | 42.06  | 38.08 | 2.69E-01 | 41.14   | 180.86 | 8.20E-01 | 27.83  | 14.35 | 5.24E-02 | 4.56   | 46.52 | 9.22E-01 |
| cg05685056 | -10.69 | 4.96  | 3.11E-02 | -17.57 | 7.06  | 1.28E-02 | -10.14  | 12.55  | 4.19E-01 | 3.21   | 16.52 | 8.46E-01 | -2.80  | 9.70  | 7.73E-01 |
| cg22888418 | 19.59  | 9.09  | 3.11E-02 | 30.85  | 17.91 | 8.50E-02 | 37.05   | 25.43  | 1.45E-01 | 9.31   | 13.53 | 4.91E-01 | 16.61  | 22.44 | 4.59E-01 |

|            |        |       |          |        |       |          |         |        |          |        |       |          |         |       |          |
|------------|--------|-------|----------|--------|-------|----------|---------|--------|----------|--------|-------|----------|---------|-------|----------|
| cg14538146 | 22.01  | 10.21 | 3.11E-02 | -0.17  | 21.02 | 9.94E-01 | 38.70   | 123.71 | 7.54E-01 | 29.95  | 12.65 | 1.79E-02 | 21.52   | 31.41 | 4.93E-01 |
| cg04642105 | 15.00  | 6.96  | 3.11E-02 | 19.03  | 18.89 | 3.14E-01 | 8.85    | 31.22  | 7.77E-01 | 13.53  | 8.01  | 9.13E-02 | 29.48   | 28.38 | 2.99E-01 |
| cg18013830 | -42.79 | 19.85 | 3.11E-02 | -38.29 | 24.66 | 1.20E-01 | -33.42  | 82.02  | 6.84E-01 | -39.22 | 74.48 | 5.98E-01 | -59.50  | 42.08 | 1.57E-01 |
| cg10274453 | 5.44   | 2.52  | 3.11E-02 | 5.39   | 3.93  | 1.70E-01 | 5.01    | 6.08   | 4.10E-01 | 7.22   | 4.46  | 1.06E-01 | 0.46    | 8.15  | 9.55E-01 |
| cg00988247 | 22.61  | 10.49 | 3.11E-02 | 27.22  | 15.10 | 7.15E-02 | 9.46    | 31.21  | 7.62E-01 | 26.61  | 23.42 | 2.56E-01 | 15.07   | 23.18 | 5.16E-01 |
| cg10124993 | 9.13   | 4.24  | 3.11E-02 | 9.01   | 7.20  | 2.11E-01 | 13.05   | 9.74   | 1.81E-01 | 7.23   | 7.26  | 3.20E-01 | 8.72    | 11.98 | 4.67E-01 |
| cg18813390 | -60.29 | 27.97 | 3.11E-02 | -59.69 | 37.78 | 1.14E-01 | 92.90   | 149.92 | 5.35E-01 | -36.26 | 60.48 | 5.49E-01 | -113.43 | 62.03 | 6.75E-02 |
| cg18133966 | -11.99 | 5.56  | 3.11E-02 | -11.81 | 9.79  | 2.27E-01 | -10.44  | 11.69  | 3.72E-01 | -13.13 | 11.98 | 2.73E-01 | -12.70  | 11.49 | 2.69E-01 |
| cg12173535 | -15.57 | 7.22  | 3.11E-02 | -8.18  | 10.95 | 4.55E-01 | 11.34   | 37.97  | 7.65E-01 | -30.70 | 12.44 | 1.36E-02 | -10.82  | 16.51 | 5.12E-01 |
| cg07692853 | 13.28  | 6.16  | 3.11E-02 | 18.71  | 8.38  | 2.56E-02 | 15.95   | 15.90  | 3.16E-01 | 15.35  | 24.55 | 5.32E-01 | -0.78   | 12.41 | 9.50E-01 |
| cg10785340 | 8.30   | 3.85  | 3.11E-02 | 12.23  | 5.26  | 2.02E-02 | 9.96    | 10.92  | 3.62E-01 | 4.44   | 9.70  | 6.47E-01 | -0.96   | 8.97  | 9.15E-01 |
| cg26182037 | -38.70 | 17.95 | 3.11E-02 | -92.70 | 52.63 | 7.82E-02 | -93.48  | 139.37 | 5.02E-01 | -33.76 | 20.01 | 9.16E-02 | 12.92   | 71.92 | 8.57E-01 |
| cg22803223 | -8.38  | 3.89  | 3.11E-02 | -16.10 | 8.01  | 4.44E-02 | -14.08  | 14.62  | 3.36E-01 | -2.12  | 4.93  | 6.67E-01 | -14.75  | 8.75  | 9.20E-02 |
| cg25051111 | 11.63  | 5.40  | 3.11E-02 | 11.95  | 6.02  | 4.70E-02 | 0.42    | 27.26  | 9.88E-01 | 8.90   | 15.60 | 5.68E-01 | 25.69   | 28.24 | 3.63E-01 |
| cg09549591 | -13.23 | 6.14  | 3.11E-02 | -24.19 | 9.31  | 9.37E-03 | 6.74    | 15.34  | 6.61E-01 | -10.77 | 12.70 | 3.96E-01 | -10.18  | 12.49 | 4.15E-01 |
| cg07202413 | 23.67  | 10.98 | 3.11E-02 | 41.31  | 15.44 | 7.45E-03 | 29.13   | 26.03  | 2.63E-01 | 32.19  | 27.04 | 2.34E-01 | -0.25   | 15.63 | 9.87E-01 |
| cg17240133 | -7.84  | 3.64  | 3.11E-02 | -11.80 | 6.55  | 7.18E-02 | -3.90   | 10.65  | 7.14E-01 | -6.11  | 5.32  | 2.51E-01 | -8.28   | 11.06 | 4.54E-01 |
| cg00906147 | 27.16  | 12.60 | 3.11E-02 | 16.77  | 14.19 | 2.37E-01 | 46.18   | 41.75  | 2.69E-01 | -16.62 | 58.69 | 7.77E-01 | 65.14   | 28.16 | 2.07E-02 |
| cg11732619 | 15.83  | 7.35  | 3.11E-02 | 10.87  | 21.16 | 6.08E-01 | -11.92  | 40.22  | 7.67E-01 | 17.17  | 8.74  | 4.94E-02 | 19.99   | 19.67 | 3.10E-01 |
| cg05299774 | -14.66 | 6.80  | 3.11E-02 | -42.07 | 17.00 | 1.33E-02 | -8.25   | 17.62  | 6.40E-01 | -10.06 | 8.57  | 2.40E-01 | -9.06   | 18.83 | 6.30E-01 |
| cg07976328 | -12.29 | 5.70  | 3.11E-02 | -15.62 | 13.19 | 2.36E-01 | -5.16   | 10.67  | 6.29E-01 | -13.18 | 8.95  | 1.41E-01 | -20.96  | 16.37 | 2.00E-01 |
| cg08472398 | 36.52  | 16.94 | 3.11E-02 | 33.88  | 27.92 | 2.25E-01 | -135.37 | 94.26  | 1.51E-01 | 38.93  | 14.18 | 6.05E-03 | 68.68   | 40.62 | 9.08E-02 |
| cg18417201 | 18.64  | 8.65  | 3.12E-02 | 17.63  | 20.01 | 3.78E-01 | 25.20   | 39.79  | 5.26E-01 | 18.83  | 10.59 | 7.54E-02 | 16.11   | 27.50 | 5.58E-01 |
| cg00199846 | -21.69 | 10.06 | 3.12E-02 | -27.29 | 37.26 | 4.64E-01 | 17.11   | 159.78 | 9.15E-01 | -19.40 | 10.73 | 7.07E-02 | -61.42  | 47.87 | 1.99E-01 |
| cg23372852 | -11.44 | 5.31  | 3.12E-02 | -1.59  | 10.41 | 8.79E-01 | -7.48   | 19.16  | 6.96E-01 | -16.66 | 7.22  | 2.10E-02 | -11.83  | 15.20 | 4.36E-01 |
| cg06605558 | 16.80  | 7.80  | 3.12E-02 | 28.37  | 17.66 | 1.08E-01 | 31.58   | 34.46  | 3.59E-01 | 14.33  | 9.39  | 1.27E-01 | -3.58   | 30.78 | 9.07E-01 |
| cg21574349 | -12.65 | 5.87  | 3.12E-02 | -31.26 | 15.91 | 4.94E-02 | 4.40    | 44.69  | 9.22E-01 | -9.97  | 6.77  | 1.41E-01 | -10.28  | 18.97 | 5.88E-01 |
| cg13683667 | -34.15 | 15.85 | 3.12E-02 | -48.25 | 20.32 | 1.76E-02 | 99.52   | 76.74  | 1.95E-01 | -42.58 | 30.76 | 1.66E-01 | -27.20  | 24.41 | 2.65E-01 |
| cg20636794 | 19.33  | 8.97  | 3.12E-02 | 30.06  | 16.96 | 7.63E-02 | 5.13    | 18.07  | 7.76E-01 | 19.25  | 14.99 | 1.99E-01 | 23.88   | 26.40 | 3.66E-01 |
| cg27203924 | -8.53  | 3.96  | 3.12E-02 | -12.27 | 9.17  | 1.81E-01 | 0.31    | 15.98  | 9.84E-01 | -7.39  | 4.90  | 1.31E-01 | -14.37  | 12.52 | 2.51E-01 |
| cg10175910 | 14.91  | 6.92  | 3.12E-02 | 0.08   | 16.52 | 9.96E-01 | 32.22   | 20.16  | 1.10E-01 | 13.35  | 8.65  | 1.23E-01 | 38.29   | 26.77 | 1.53E-01 |
| cg15488009 | 7.39   | 3.43  | 3.12E-02 | 7.05   | 5.64  | 2.11E-01 | 9.34    | 6.99   | 1.82E-01 | 7.95   | 8.98  | 3.76E-01 | 5.64    | 6.94  | 4.16E-01 |
| cg08936706 | 18.81  | 8.73  | 3.12E-02 | 7.50   | 14.32 | 6.01E-01 | 28.70   | 15.37  | 6.19E-02 | 28.09  | 20.80 | 1.77E-01 | 14.03   | 24.25 | 5.63E-01 |
| cg10734665 | -10.18 | 4.73  | 3.12E-02 | -10.55 | 6.78  | 1.20E-01 | -23.75  | 12.88  | 6.52E-02 | 4.38   | 11.05 | 6.92E-01 | -13.55  | 10.68 | 2.05E-01 |
| cg15032166 | 11.10  | 5.15  | 3.12E-02 | 16.43  | 8.21  | 4.53E-02 | 6.28    | 14.68  | 6.69E-01 | 15.64  | 10.82 | 1.48E-01 | 1.20    | 10.18 | 9.06E-01 |

|            |        |       |          |        |       |          |        |        |          |         |       |          |         |       |          |
|------------|--------|-------|----------|--------|-------|----------|--------|--------|----------|---------|-------|----------|---------|-------|----------|
| cg05824973 | -10.84 | 5.03  | 3.12E-02 | -14.72 | 7.55  | 5.11E-02 | -7.38  | 10.51  | 4.83E-01 | 7.87    | 14.46 | 5.86E-01 | -17.36  | 11.11 | 1.18E-01 |
| cg14893576 | 9.75   | 4.53  | 3.12E-02 | 10.89  | 5.73  | 5.73E-02 | 11.69  | 11.76  | 3.20E-01 | 12.91   | 19.32 | 5.04E-01 | 2.96    | 10.92 | 7.86E-01 |
| cg13672103 | 22.55  | 10.47 | 3.12E-02 | 19.12  | 21.69 | 3.78E-01 | -44.41 | 50.03  | 3.75E-01 | 28.09   | 13.21 | 3.34E-02 | 25.20   | 33.94 | 4.58E-01 |
| cg06663648 | -44.43 | 20.62 | 3.12E-02 | -29.44 | 22.94 | 1.99E-01 | -75.83 | 143.20 | 5.96E-01 | -113.87 | 81.45 | 1.62E-01 | -109.55 | 62.91 | 8.16E-02 |
| cg20795139 | 17.00  | 7.89  | 3.12E-02 | -5.71  | 25.27 | 8.21E-01 | -27.85 | 86.19  | 7.47E-01 | 19.31   | 8.57  | 2.42E-02 | 31.03   | 37.08 | 4.03E-01 |
| cg05949203 | 14.78  | 6.86  | 3.12E-02 | 19.53  | 11.15 | 7.99E-02 | 24.14  | 18.11  | 1.83E-01 | 0.95    | 11.73 | 9.35E-01 | 26.42   | 18.60 | 1.55E-01 |
| cg01569709 | 15.30  | 7.10  | 3.12E-02 | 17.68  | 10.32 | 8.68E-02 | 22.70  | 16.61  | 1.72E-01 | 14.70   | 22.63 | 5.16E-01 | 5.43    | 14.35 | 7.05E-01 |
| cg15023038 | 10.46  | 4.86  | 3.12E-02 | 15.50  | 7.25  | 3.25E-02 | 3.48   | 10.05  | 7.30E-01 | -2.24   | 17.83 | 9.00E-01 | 11.73   | 9.84  | 2.33E-01 |
| cg06820243 | -30.81 | 14.30 | 3.12E-02 | -23.48 | 18.00 | 1.92E-01 | -24.47 | 88.25  | 7.82E-01 | -72.65  | 41.50 | 8.00E-02 | -30.02  | 30.22 | 3.20E-01 |
| cg22573528 | -32.38 | 15.03 | 3.12E-02 | -32.49 | 21.94 | 1.39E-01 | 76.94  | 68.33  | 2.60E-01 | -46.60  | 30.62 | 1.28E-01 | -39.88  | 30.60 | 1.92E-01 |
| cg21243919 | 22.07  | 10.24 | 3.12E-02 | 22.76  | 20.17 | 2.59E-01 | 28.42  | 54.70  | 6.03E-01 | 13.96   | 14.50 | 3.35E-01 | 39.62   | 22.48 | 7.79E-02 |
| cg06309788 | 10.53  | 4.89  | 3.12E-02 | 13.27  | 6.49  | 4.11E-02 | 11.34  | 11.60  | 3.28E-01 | -0.55   | 17.37 | 9.75E-01 | 5.90    | 11.63 | 6.12E-01 |
| cg27516100 | 7.81   | 3.63  | 3.12E-02 | 6.82   | 4.45  | 1.26E-01 | 11.99  | 9.62   | 2.13E-01 | 15.21   | 13.39 | 2.56E-01 | 3.90    | 10.45 | 7.09E-01 |
| cg13844341 | 6.33   | 2.94  | 3.12E-02 | 3.48   | 3.57  | 3.30E-01 | 14.88  | 7.35   | 4.29E-02 | 7.05    | 11.95 | 5.55E-01 | 11.45   | 9.22  | 2.14E-01 |
| cg25697357 | -10.49 | 4.87  | 3.12E-02 | -15.69 | 10.59 | 1.38E-01 | -7.13  | 14.33  | 6.19E-01 | -7.56   | 6.76  | 2.64E-01 | -15.79  | 12.43 | 2.04E-01 |
| cg12103152 | 19.93  | 9.25  | 3.12E-02 | 31.85  | 15.40 | 3.86E-02 | 13.15  | 23.41  | 5.74E-01 | 20.14   | 25.02 | 4.21E-01 | 10.47   | 15.73 | 5.06E-01 |
| cg26826957 | -7.95  | 3.69  | 3.13E-02 | -10.54 | 9.20  | 2.52E-01 | -2.70  | 11.72  | 8.18E-01 | -7.73   | 4.70  | 1.00E-01 | -9.86   | 10.48 | 3.47E-01 |
| cg12572625 | 9.91   | 4.60  | 3.13E-02 | 14.04  | 7.38  | 5.72E-02 | 18.05  | 10.97  | 9.97E-02 | -2.14   | 9.38  | 8.20E-01 | 9.19    | 10.42 | 3.78E-01 |
| cg16733419 | -8.96  | 4.16  | 3.13E-02 | -6.05  | 9.25  | 5.13E-01 | -3.49  | 13.03  | 7.89E-01 | -12.22  | 5.39  | 2.34E-02 | -1.00   | 13.16 | 9.40E-01 |
| cg13861749 | -9.02  | 4.19  | 3.13E-02 | -16.33 | 9.07  | 7.18E-02 | 11.08  | 20.26  | 5.85E-01 | -7.55   | 5.13  | 1.41E-01 | -12.73  | 15.14 | 4.00E-01 |
| cg02978140 | -5.19  | 2.41  | 3.13E-02 | -6.41  | 3.47  | 6.47E-02 | -5.29  | 4.94   | 2.85E-01 | 3.13    | 7.65  | 6.83E-01 | -6.39   | 5.68  | 2.61E-01 |
| cg27592794 | 8.59   | 3.99  | 3.13E-02 | 11.88  | 5.26  | 2.40E-02 | 9.85   | 9.13   | 2.81E-01 | -5.96   | 17.00 | 7.26E-01 | 1.17    | 9.42  | 9.01E-01 |
| cg12975597 | -8.27  | 3.84  | 3.13E-02 | -8.48  | 8.70  | 3.29E-01 | 16.52  | 19.80  | 4.04E-01 | -10.08  | 4.82  | 3.65E-02 | -6.32   | 10.51 | 5.48E-01 |
| cg11557901 | 4.45   | 2.07  | 3.13E-02 | 4.23   | 2.82  | 1.35E-01 | 8.89   | 5.28   | 9.25E-02 | 2.93    | 4.61  | 5.25E-01 | 2.16    | 6.20  | 7.28E-01 |
| cg15977773 | -8.19  | 3.80  | 3.13E-02 | -12.63 | 6.91  | 6.75E-02 | -3.91  | 8.80   | 6.56E-01 | -9.21   | 6.25  | 1.41E-01 | -1.58   | 10.16 | 8.76E-01 |
| cg01923089 | 7.40   | 3.44  | 3.13E-02 | 7.34   | 4.60  | 1.11E-01 | 12.04  | 7.89   | 1.27E-01 | 10.33   | 9.85  | 2.94E-01 | -1.81   | 9.51  | 8.49E-01 |
| cg03537386 | 9.07   | 4.21  | 3.13E-02 | 9.62   | 5.70  | 9.13E-02 | 15.62  | 10.22  | 1.26E-01 | 2.86    | 10.97 | 7.94E-01 | 5.42    | 11.42 | 6.35E-01 |
| cg09856709 | 24.14  | 11.21 | 3.13E-02 | 21.90  | 17.05 | 1.99E-01 | 36.10  | 29.36  | 2.19E-01 | 35.17   | 28.51 | 2.17E-01 | 14.86   | 21.68 | 4.93E-01 |
| cg20304988 | -15.68 | 7.28  | 3.13E-02 | -18.98 | 19.65 | 3.34E-01 | -13.77 | 24.41  | 5.73E-01 | -15.30  | 8.66  | 7.72E-02 | -15.45  | 28.23 | 5.84E-01 |
| cg15006864 | 13.13  | 6.10  | 3.13E-02 | 6.35   | 8.67  | 4.64E-01 | 19.41  | 12.74  | 1.28E-01 | 28.85   | 16.64 | 8.30E-02 | 11.75   | 16.17 | 4.67E-01 |
| cg09629675 | -11.07 | 5.14  | 3.13E-02 | -14.80 | 7.96  | 6.29E-02 | -7.13  | 11.43  | 5.33E-01 | -11.92  | 13.72 | 3.85E-01 | -7.40   | 10.48 | 4.80E-01 |
| cg23228450 | -15.03 | 6.98  | 3.13E-02 | -18.96 | 10.39 | 6.80E-02 | -17.78 | 14.82  | 2.30E-01 | -10.95  | 20.51 | 5.94E-01 | -5.99   | 15.20 | 6.94E-01 |
| cg05516012 | -26.97 | 12.53 | 3.13E-02 | -42.89 | 22.37 | 5.52E-02 | -19.29 | 27.98  | 4.91E-01 | -10.30  | 22.44 | 6.46E-01 | -36.98  | 29.98 | 2.17E-01 |
| cg00203089 | 33.38  | 15.50 | 3.13E-02 | 26.63  | 58.94 | 6.51E-01 | -12.74 | 223.17 | 9.54E-01 | 34.37   | 16.77 | 4.04E-02 | 31.12   | 57.98 | 5.91E-01 |
| cg00374263 | -4.85  | 2.25  | 3.13E-02 | -4.75  | 3.52  | 1.77E-01 | -4.51  | 4.33   | 2.98E-01 | -7.21   | 5.84  | 2.17E-01 | -3.58   | 5.43  | 5.09E-01 |

|            |        |       |          |        |       |          |         |        |          |        |       |          |        |       |          |
|------------|--------|-------|----------|--------|-------|----------|---------|--------|----------|--------|-------|----------|--------|-------|----------|
| cg01792749 | -6.80  | 3.16  | 3.13E-02 | -15.93 | 7.27  | 2.85E-02 | 5.76    | 13.23  | 6.63E-01 | -4.82  | 3.93  | 2.19E-01 | -9.25  | 9.54  | 3.32E-01 |
| cg17121140 | -6.22  | 2.89  | 3.13E-02 | -2.75  | 3.76  | 4.64E-01 | -9.40   | 4.69   | 4.50E-02 | 2.50   | 8.55  | 7.70E-01 | -13.14 | 5.95  | 2.72E-02 |
| cg17112426 | 9.63   | 4.47  | 3.13E-02 | 6.82   | 6.28  | 2.78E-01 | 16.47   | 10.30  | 1.10E-01 | 9.68   | 11.24 | 3.89E-01 | 10.48  | 11.66 | 3.69E-01 |
| cg01557791 | -21.48 | 9.97  | 3.13E-02 | -58.91 | 37.74 | 1.19E-01 | 79.08   | 147.93 | 5.93E-01 | -17.89 | 10.73 | 9.55E-02 | -36.63 | 40.07 | 3.61E-01 |
| cg07765813 | 39.08  | 18.15 | 3.13E-02 | 50.16  | 31.84 | 1.15E-01 | -175.43 | 129.11 | 1.74E-01 | 32.63  | 14.60 | 2.54E-02 | 80.01  | 46.80 | 8.74E-02 |
| cg03577837 | -15.08 | 7.01  | 3.13E-02 | -30.54 | 13.22 | 2.08E-02 | -10.71  | 18.05  | 5.53E-01 | -12.71 | 11.18 | 2.55E-01 | 0.59   | 16.72 | 9.72E-01 |
| cg05813194 | 20.68  | 9.61  | 3.13E-02 | 49.82  | 25.92 | 5.46E-02 | 2.24    | 102.72 | 9.83E-01 | 20.25  | 9.57  | 3.43E-02 | -28.03 | 36.25 | 4.39E-01 |
| cg22156456 | 14.96  | 6.95  | 3.13E-02 | 14.18  | 9.66  | 1.42E-01 | 19.62   | 17.09  | 2.51E-01 | 34.00  | 18.61 | 6.76E-02 | -2.06  | 16.48 | 9.01E-01 |
| cg22252999 | 4.79   | 2.23  | 3.13E-02 | 2.92   | 3.36  | 3.85E-01 | 5.29    | 4.31   | 2.19E-01 | 7.09   | 4.88  | 1.47E-01 | 7.20   | 7.53  | 3.39E-01 |
| cg21048700 | -7.73  | 3.59  | 3.13E-02 | -10.61 | 7.14  | 1.37E-01 | -0.94   | 8.05   | 9.07E-01 | -7.45  | 5.46  | 1.72E-01 | -14.24 | 10.59 | 1.79E-01 |
| cg02023973 | 5.82   | 2.70  | 3.13E-02 | 4.57   | 3.28  | 1.63E-01 | 10.66   | 6.40   | 9.61E-02 | 5.62   | 10.48 | 5.91E-01 | 5.82   | 9.80  | 5.52E-01 |
| cg18516365 | 21.76  | 10.11 | 3.13E-02 | 13.98  | 24.29 | 5.65E-01 | 106.88  | 48.50  | 2.76E-02 | 19.12  | 10.59 | 7.09E-02 | 17.30  | 25.11 | 4.91E-01 |
| cg01039752 | 11.92  | 5.54  | 3.13E-02 | 19.72  | 10.36 | 5.70E-02 | 16.17   | 10.10  | 1.09E-01 | 1.15   | 11.22 | 9.18E-01 | 6.75   | 13.42 | 6.15E-01 |
| cg24749470 | -7.62  | 3.54  | 3.13E-02 | -14.19 | 6.46  | 2.81E-02 | -5.32   | 7.75   | 4.93E-01 | -5.70  | 6.28  | 3.64E-01 | -2.54  | 8.53  | 7.65E-01 |
| cg24023097 | 31.07  | 14.43 | 3.13E-02 | 56.18  | 44.31 | 2.05E-01 | -96.91  | 130.11 | 4.56E-01 | 30.77  | 16.23 | 5.79E-02 | 21.68  | 48.08 | 6.52E-01 |
| cg01752322 | 16.85  | 7.83  | 3.13E-02 | 26.89  | 22.98 | 2.42E-01 | 43.47   | 32.92  | 1.87E-01 | 14.12  | 8.99  | 1.16E-01 | 8.26   | 29.59 | 7.80E-01 |
| cg16692735 | -5.02  | 2.33  | 3.13E-02 | -6.24  | 3.21  | 5.17E-02 | -1.53   | 5.62   | 7.86E-01 | 5.49   | 8.41  | 5.14E-01 | -8.47  | 4.95  | 8.72E-02 |
| cg02630207 | -10.25 | 4.76  | 3.13E-02 | -20.44 | 12.68 | 1.07E-01 | -0.12   | 21.44  | 9.95E-01 | -9.85  | 5.50  | 7.30E-02 | 0.60   | 19.59 | 9.75E-01 |
| cg05134013 | -72.89 | 33.86 | 3.14E-02 | -73.60 | 45.73 | 1.08E-01 | 214.26  | 187.39 | 2.53E-01 | -97.68 | 65.27 | 1.34E-01 | -88.34 | 87.48 | 3.13E-01 |
| cg19342782 | 4.79   | 2.23  | 3.14E-02 | 6.33   | 3.16  | 4.51E-02 | 4.70    | 5.85   | 4.22E-01 | 3.69   | 4.63  | 4.25E-01 | 0.91   | 6.23  | 8.84E-01 |
| cg07298177 | 6.06   | 2.81  | 3.14E-02 | 5.23   | 3.57  | 1.43E-01 | 14.06   | 7.29   | 5.37E-02 | 0.74   | 8.58  | 9.31E-01 | 5.19   | 8.03  | 5.18E-01 |
| cg02937763 | -12.37 | 5.75  | 3.14E-02 | -8.56  | 10.98 | 4.36E-01 | -1.71   | 17.28  | 9.21E-01 | -15.23 | 8.38  | 6.93E-02 | -18.45 | 15.09 | 2.21E-01 |
| cg04102208 | -28.32 | 13.16 | 3.14E-02 | -16.44 | 18.84 | 3.83E-01 | -76.87  | 38.47  | 4.57E-02 | -28.67 | 38.49 | 4.56E-01 | -28.59 | 24.94 | 2.52E-01 |
| cg26479028 | -8.83  | 4.10  | 3.14E-02 | -4.61  | 8.75  | 5.98E-01 | 6.09    | 15.12  | 6.87E-01 | -10.68 | 5.28  | 4.31E-02 | -17.65 | 12.79 | 1.67E-01 |
| cg17565113 | -12.14 | 5.64  | 3.14E-02 | -1.55  | 12.02 | 8.98E-01 | -38.13  | 20.61  | 6.43E-02 | -12.28 | 7.10  | 8.39E-02 | -16.23 | 20.75 | 4.34E-01 |
| cg05332854 | 6.92   | 3.22  | 3.14E-02 | 3.73   | 4.57  | 4.14E-01 | 8.17    | 6.50   | 2.09E-01 | 18.57  | 11.86 | 1.18E-01 | 9.19   | 7.47  | 2.18E-01 |
| cg10359143 | -7.90  | 3.67  | 3.14E-02 | -9.18  | 7.80  | 2.39E-01 | -8.96   | 12.10  | 4.59E-01 | -6.19  | 5.12  | 2.27E-01 | -10.73 | 8.79  | 2.22E-01 |
| cg09849405 | 14.28  | 6.64  | 3.14E-02 | -8.92  | 21.80 | 6.82E-01 | 20.14   | 48.95  | 6.81E-01 | 17.91  | 7.31  | 1.44E-02 | 0.00   | 25.86 | 1.00E+00 |
| cg06081580 | -33.77 | 15.69 | 3.14E-02 | -29.15 | 19.90 | 1.43E-01 | 33.70   | 105.45 | 7.49E-01 | -67.44 | 44.97 | 1.34E-01 | -34.89 | 32.37 | 2.81E-01 |
| cg14425564 | 10.57  | 4.91  | 3.14E-02 | 13.91  | 9.96  | 1.62E-01 | 12.65   | 9.32   | 1.75E-01 | 13.79  | 9.81  | 1.60E-01 | 0.94   | 10.29 | 9.27E-01 |
| cg04747036 | -28.12 | 13.06 | 3.14E-02 | -28.89 | 16.92 | 8.77E-02 | -2.24   | 37.65  | 9.53E-01 | -65.94 | 28.67 | 2.15E-02 | 3.31   | 32.56 | 9.19E-01 |
| cg14032195 | -16.75 | 7.78  | 3.14E-02 | -33.22 | 22.26 | 1.36E-01 | -13.60  | 30.69  | 6.58E-01 | -13.88 | 9.05  | 1.25E-01 | -21.00 | 28.58 | 4.62E-01 |
| cg08047482 | 13.26  | 6.16  | 3.14E-02 | 19.55  | 8.55  | 2.23E-02 | 16.37   | 18.31  | 3.71E-01 | 12.97  | 18.57 | 4.85E-01 | -0.63  | 12.13 | 9.58E-01 |
| cg12576153 | -39.50 | 18.35 | 3.14E-02 | -20.05 | 37.11 | 5.89E-01 | -133.14 | 236.30 | 5.73E-01 | -39.51 | 22.79 | 8.29E-02 | -81.05 | 57.83 | 1.61E-01 |
| cg14387743 | 8.85   | 4.11  | 3.14E-02 | 8.70   | 5.66  | 1.24E-01 | 16.94   | 6.43   | 8.47E-03 | 6.94   | 9.49  | 4.64E-01 | -5.61  | 10.04 | 5.76E-01 |



|               |        |       |          |        |       |          |        |        |          |        |       |          |        |       |          |
|---------------|--------|-------|----------|--------|-------|----------|--------|--------|----------|--------|-------|----------|--------|-------|----------|
| cg11363197    | 43.40  | 20.16 | 3.14E-02 | 14.28  | 17.45 | 4.13E-01 | 9.28   | 51.45  | 8.57E-01 | 71.43  | 39.16 | 6.81E-02 | 79.21  | 25.47 | 1.87E-03 |
| cg09447182    | 29.43  | 13.67 | 3.14E-02 | 8.60   | 17.24 | 6.18E-01 | 69.92  | 35.62  | 4.97E-02 | 51.94  | 38.41 | 1.76E-01 | 40.48  | 28.22 | 1.51E-01 |
| cg08895928    | 13.48  | 6.26  | 3.14E-02 | 1.58   | 14.08 | 9.10E-01 | 9.36   | 12.56  | 4.56E-01 | 9.37   | 16.88 | 5.79E-01 | 22.97  | 9.71  | 1.80E-02 |
| cg19434164    | 13.35  | 6.21  | 3.14E-02 | 14.43  | 8.04  | 7.28E-02 | 12.30  | 14.00  | 3.80E-01 | 22.48  | 24.81 | 3.65E-01 | 6.47   | 16.26 | 6.91E-01 |
| cg06378107    | 16.90  | 7.85  | 3.14E-02 | 8.77   | 17.23 | 6.11E-01 | 68.21  | 41.65  | 1.01E-01 | 13.09  | 9.63  | 1.74E-01 | 42.86  | 25.84 | 9.72E-02 |
| cg11784191    | 20.24  | 9.40  | 3.14E-02 | 41.79  | 17.40 | 1.63E-02 | -2.94  | 18.54  | 8.74E-01 | 19.51  | 16.55 | 2.38E-01 | 19.83  | 23.25 | 3.94E-01 |
| cg27327334    | 20.95  | 9.73  | 3.14E-02 | 30.25  | 16.48 | 6.64E-02 | -22.05 | 39.87  | 5.80E-01 | 15.43  | 15.18 | 3.09E-01 | 29.69  | 22.90 | 1.95E-01 |
| cg04508884    | -44.50 | 20.68 | 3.14E-02 | -69.05 | 25.22 | 6.18E-03 | -12.92 | 76.87  | 8.67E-01 | 35.96  | 60.58 | 5.53E-01 | -24.16 | 47.18 | 6.09E-01 |
| cg09009536    | 16.37  | 7.61  | 3.14E-02 | 37.36  | 18.57 | 4.42E-02 | 14.48  | 25.40  | 5.69E-01 | 18.93  | 9.39  | 4.38E-02 | -5.58  | 16.11 | 7.29E-01 |
| cg24282845    | 17.79  | 8.26  | 3.14E-02 | 18.93  | 21.42 | 3.77E-01 | 37.99  | 30.60  | 2.14E-01 | 16.60  | 9.82  | 9.11E-02 | 6.34   | 31.22 | 8.39E-01 |
| cg25707945    | 25.79  | 11.98 | 3.14E-02 | 26.49  | 15.27 | 8.27E-02 | 61.34  | 50.87  | 2.28E-01 | 2.76   | 42.04 | 9.48E-01 | 23.62  | 24.10 | 3.27E-01 |
| cg21946195    | 10.77  | 5.01  | 3.14E-02 | 11.39  | 7.12  | 1.10E-01 | 9.92   | 11.55  | 3.91E-01 | 22.26  | 12.35 | 7.16E-02 | -2.44  | 12.77 | 8.48E-01 |
| cg11217934    | -13.65 | 6.34  | 3.14E-02 | -18.03 | 16.34 | 2.70E-01 | -59.91 | 35.64  | 9.28E-02 | -9.44  | 7.43  | 2.04E-01 | -24.17 | 21.23 | 2.55E-01 |
| cg13983319    | 12.24  | 5.69  | 3.14E-02 | 35.19  | 17.98 | 5.03E-02 | 20.71  | 22.11  | 3.49E-01 | 9.89   | 7.57  | 1.92E-01 | 6.55   | 10.97 | 5.50E-01 |
| cg01423335    | 19.31  | 8.97  | 3.14E-02 | 22.48  | 10.22 | 2.78E-02 | 13.38  | 60.73  | 8.26E-01 | -22.28 | 53.98 | 6.80E-01 | 12.82  | 21.17 | 5.45E-01 |
| cg20690488    | 9.41   | 4.37  | 3.14E-02 | -3.60  | 10.43 | 7.30E-01 | 7.89   | 11.57  | 4.95E-01 | 15.17  | 5.83  | 9.24E-03 | 3.14   | 12.73 | 8.05E-01 |
| cg26705720    | 24.27  | 11.28 | 3.14E-02 | 56.59  | 32.22 | 7.90E-02 | -41.10 | 133.87 | 7.59E-01 | 17.26  | 12.59 | 1.70E-01 | 55.45  | 43.22 | 2.00E-01 |
| cg09372063    | 18.84  | 8.75  | 3.14E-02 | 11.09  | 15.00 | 4.60E-01 | 26.63  | 16.12  | 9.86E-02 | 8.97   | 21.20 | 6.72E-01 | 29.24  | 19.87 | 1.41E-01 |
| cg03344820    | 25.67  | 11.93 | 3.14E-02 | 51.49  | 39.03 | 1.87E-01 | 51.89  | 117.74 | 6.59E-01 | 23.93  | 13.23 | 7.06E-02 | 10.48  | 41.30 | 8.00E-01 |
| cg15301489    | 26.54  | 12.33 | 3.14E-02 | 30.93  | 31.51 | 3.26E-01 | 19.95  | 69.03  | 7.73E-01 | 19.71  | 14.76 | 1.82E-01 | 63.58  | 36.17 | 7.88E-02 |
| ch.1.3178922R | -25.77 | 11.98 | 3.14E-02 | -23.01 | 13.21 | 8.14E-02 | -28.61 | 53.78  | 5.95E-01 | -57.22 | 56.66 | 3.13E-01 | -34.46 | 41.55 | 4.07E-01 |
| cg24564603    | 5.55   | 2.58  | 3.14E-02 | 8.67   | 4.37  | 4.73E-02 | 0.98   | 5.46   | 8.58E-01 | 4.19   | 4.60  | 3.62E-01 | 8.68   | 7.62  | 2.55E-01 |
| cg16261857    | -9.07  | 4.21  | 3.14E-02 | -11.07 | 8.41  | 1.88E-01 | -2.55  | 11.22  | 8.20E-01 | -8.31  | 6.15  | 1.77E-01 | -14.58 | 11.28 | 1.96E-01 |
| cg08336604    | -12.38 | 5.75  | 3.14E-02 | -2.19  | 10.38 | 8.33E-01 | -17.32 | 16.43  | 2.92E-01 | -9.79  | 5.17  | 5.84E-02 | -36.82 | 14.77 | 1.27E-02 |
| cg20256403    | 25.11  | 11.67 | 3.14E-02 | 17.34  | 36.71 | 6.37E-01 | 150.84 | 172.61 | 3.82E-01 | 22.31  | 12.90 | 8.36E-02 | 58.60  | 42.64 | 1.69E-01 |
| cg17306814    | -10.18 | 4.73  | 3.14E-02 | -4.61  | 11.89 | 6.98E-01 | -27.73 | 19.92  | 1.64E-01 | -11.04 | 5.58  | 4.79E-02 | 0.80   | 18.43 | 9.65E-01 |
| cg02614016    | -13.38 | 6.22  | 3.14E-02 | -1.01  | 13.33 | 9.40E-01 | 18.58  | 26.04  | 4.76E-01 | -20.33 | 6.72  | 2.51E-03 | -14.24 | 14.32 | 3.20E-01 |
| cg00460049    | 24.29  | 11.29 | 3.14E-02 | 40.46  | 17.56 | 2.12E-02 | 0.27   | 45.20  | 9.95E-01 | 30.41  | 28.90 | 2.93E-01 | 7.83   | 18.52 | 6.73E-01 |
| cg19621271    | 20.23  | 9.41  | 3.14E-02 | 19.45  | 13.12 | 1.38E-01 | 23.50  | 21.51  | 2.75E-01 | 9.32   | 35.86 | 7.95E-01 | 22.57  | 19.78 | 2.54E-01 |
| cg01432520    | -8.46  | 3.93  | 3.15E-02 | -10.08 | 7.39  | 1.72E-01 | 0.03   | 13.55  | 9.98E-01 | -7.06  | 5.52  | 2.01E-01 | -16.22 | 11.13 | 1.45E-01 |
| cg04177287    | -8.34  | 3.87  | 3.15E-02 | -14.55 | 7.41  | 4.98E-02 | -9.30  | 9.93   | 3.49E-01 | -1.44  | 5.32  | 7.87E-01 | -17.23 | 9.49  | 6.95E-02 |
| cg09209002    | -16.55 | 7.70  | 3.15E-02 | -6.71  | 22.41 | 7.65E-01 | 40.26  | 125.63 | 7.49E-01 | -20.92 | 8.40  | 1.28E-02 | 41.73  | 38.80 | 2.82E-01 |
| cg21645554    | 10.55  | 4.90  | 3.15E-02 | 6.97   | 7.80  | 3.71E-01 | 18.21  | 9.86   | 6.46E-02 | 9.31   | 13.05 | 4.76E-01 | 9.12   | 10.55 | 3.87E-01 |
| cg23713724    | 12.68  | 5.89  | 3.15E-02 | 19.79  | 13.40 | 1.40E-01 | 11.52  | 18.51  | 5.34E-01 | 18.24  | 7.95  | 2.17E-02 | -6.76  | 12.72 | 5.95E-01 |
| cg20761290    | 34.55  | 16.06 | 3.15E-02 | 28.47  | 17.26 | 9.91E-02 | -52.64 | 73.78  | 4.76E-01 | 95.42  | 78.44 | 2.24E-01 | 73.37  | 39.82 | 6.54E-02 |

|            |        |       |          |        |       |          |         |        |          |         |       |          |        |       |          |
|------------|--------|-------|----------|--------|-------|----------|---------|--------|----------|---------|-------|----------|--------|-------|----------|
| cg16918050 | -8.68  | 4.03  | 3.15E-02 | -7.70  | 7.61  | 3.12E-01 | -6.14   | 8.40   | 4.64E-01 | -11.83  | 7.30  | 1.05E-01 | -8.11  | 9.44  | 3.91E-01 |
| cg04984709 | -13.76 | 6.39  | 3.15E-02 | -19.23 | 18.30 | 2.93E-01 | 7.05    | 26.97  | 7.94E-01 | -14.29  | 7.39  | 5.30E-02 | -15.11 | 23.78 | 5.25E-01 |
| cg06094482 | -6.87  | 3.20  | 3.15E-02 | -6.97  | 4.62  | 1.32E-01 | -2.75   | 7.25   | 7.04E-01 | -4.77   | 8.74  | 5.85E-01 | -12.18 | 7.24  | 9.26E-02 |
| cg04919263 | 21.25  | 9.88  | 3.15E-02 | 60.99  | 38.46 | 1.13E-01 | 157.56  | 146.34 | 2.82E-01 | 19.57   | 11.21 | 8.09E-02 | 8.59   | 25.24 | 7.33E-01 |
| cg14566103 | 11.87  | 5.52  | 3.15E-02 | 18.83  | 9.41  | 4.54E-02 | -4.74   | 11.58  | 6.82E-01 | 18.67   | 12.23 | 1.27E-01 | 11.86  | 11.62 | 3.08E-01 |
| cg14523238 | -10.29 | 4.79  | 3.15E-02 | -11.11 | 7.28  | 1.27E-01 | 5.07    | 13.03  | 6.97E-01 | -17.66  | 10.08 | 7.97E-02 | -10.56 | 10.51 | 3.15E-01 |
| cg12798118 | 26.05  | 12.11 | 3.15E-02 | 40.53  | 41.70 | 3.31E-01 | -165.33 | 140.36 | 2.39E-01 | 27.82   | 13.27 | 3.61E-02 | 9.19   | 44.16 | 8.35E-01 |
| cg07446438 | -29.01 | 13.49 | 3.15E-02 | -40.57 | 32.52 | 2.12E-01 | 111.56  | 156.03 | 4.75E-01 | -27.64  | 15.62 | 7.67E-02 | -30.10 | 49.48 | 5.43E-01 |
| cg16744314 | -10.49 | 4.88  | 3.15E-02 | -10.44 | 6.90  | 1.30E-01 | -27.14  | 13.73  | 4.81E-02 | 1.33    | 10.79 | 9.02E-01 | -12.49 | 11.85 | 2.92E-01 |
| cg21142349 | -7.91  | 3.68  | 3.15E-02 | -5.56  | 8.26  | 5.01E-01 | -24.19  | 15.66  | 1.22E-01 | -9.45   | 4.55  | 3.79E-02 | 7.23   | 11.92 | 5.44E-01 |
| cg09805925 | -17.18 | 7.99  | 3.15E-02 | 1.68   | 17.91 | 9.25E-01 | -35.94  | 41.39  | 3.85E-01 | -18.22  | 10.01 | 6.88E-02 | -35.88 | 22.36 | 1.09E-01 |
| cg14469826 | -5.07  | 2.36  | 3.15E-02 | -6.65  | 4.71  | 1.57E-01 | -3.58   | 5.41   | 5.09E-01 | -5.53   | 3.70  | 1.35E-01 | -3.09  | 6.03  | 6.08E-01 |
| cg01266375 | -7.75  | 3.61  | 3.15E-02 | -3.65  | 6.64  | 5.82E-01 | -10.10  | 11.54  | 3.81E-01 | -11.15  | 5.35  | 3.70E-02 | -4.04  | 9.23  | 6.61E-01 |
| cg14138132 | 19.90  | 9.25  | 3.15E-02 | 21.26  | 20.39 | 2.97E-01 | -92.28  | 92.41  | 3.18E-01 | 19.15   | 10.92 | 7.94E-02 | 40.89  | 36.06 | 2.57E-01 |
| cg01805856 | 21.48  | 9.99  | 3.15E-02 | 29.46  | 19.54 | 1.32E-01 | 53.50   | 39.21  | 1.72E-01 | 11.66   | 13.62 | 3.92E-01 | 29.69  | 27.08 | 2.73E-01 |
| cg23554497 | 10.52  | 4.89  | 3.15E-02 | 9.68   | 6.97  | 1.65E-01 | 4.94    | 11.54  | 6.69E-01 | 2.03    | 17.90 | 9.10E-01 | 18.64  | 9.73  | 5.55E-02 |
| cg09453870 | 26.02  | 12.10 | 3.15E-02 | 36.25  | 19.42 | 6.20E-02 | 96.56   | 41.61  | 2.03E-02 | 15.45   | 13.27 | 2.44E-01 | 10.62  | 20.75 | 6.09E-01 |
| cg12506013 | -5.64  | 2.62  | 3.15E-02 | -4.05  | 3.76  | 2.82E-01 | -12.13  | 5.64   | 3.17E-02 | 2.21    | 7.98  | 7.82E-01 | -6.79  | 6.01  | 2.59E-01 |
| cg25023752 | -33.30 | 15.49 | 3.15E-02 | -20.88 | 18.31 | 2.54E-01 | -93.69  | 63.08  | 1.38E-01 | -48.25  | 73.02 | 5.09E-01 | -58.77 | 36.55 | 1.08E-01 |
| cg25102726 | 5.25   | 2.44  | 3.15E-02 | 2.65   | 3.76  | 4.81E-01 | 6.57    | 5.43   | 2.26E-01 | 7.78    | 6.85  | 2.57E-01 | 7.28   | 4.89  | 1.36E-01 |
| cg02771142 | 16.24  | 7.55  | 3.15E-02 | 16.31  | 12.00 | 1.74E-01 | 13.16   | 20.87  | 5.28E-01 | 25.28   | 17.81 | 1.56E-01 | 11.97  | 13.95 | 3.91E-01 |
| cg27069188 | 11.73  | 5.46  | 3.15E-02 | 13.86  | 7.02  | 4.83E-02 | -5.85   | 17.57  | 7.39E-01 | 23.73   | 23.83 | 3.19E-01 | 10.84  | 10.98 | 3.24E-01 |
| cg00277384 | 18.23  | 8.48  | 3.15E-02 | -0.33  | 14.67 | 9.82E-01 | 33.34   | 16.43  | 4.24E-02 | 16.77   | 15.89 | 2.91E-01 | 35.95  | 22.48 | 1.10E-01 |
| cg05016425 | -35.42 | 16.48 | 3.15E-02 | -14.50 | 21.52 | 5.00E-01 | -56.54  | 53.15  | 2.87E-01 | -113.59 | 65.58 | 8.32E-02 | -56.29 | 32.67 | 8.48E-02 |
| cg21746884 | 15.51  | 7.21  | 3.15E-02 | 22.19  | 20.03 | 2.68E-01 | 8.92    | 21.32  | 6.76E-01 | 12.45   | 8.75  | 1.55E-01 | 41.42  | 26.17 | 1.13E-01 |
| cg07236562 | -7.83  | 3.64  | 3.15E-02 | -12.99 | 7.15  | 6.90E-02 | -1.85   | 7.25   | 7.98E-01 | -7.31   | 6.17  | 2.36E-01 | -10.34 | 9.76  | 2.89E-01 |
| cg10792982 | -12.07 | 5.61  | 3.15E-02 | -27.54 | 15.74 | 8.03E-02 | -16.75  | 15.42  | 2.77E-01 | -8.21   | 6.88  | 2.33E-01 | -11.96 | 20.74 | 5.64E-01 |
| cg27223805 | 13.45  | 6.26  | 3.16E-02 | 15.44  | 10.62 | 1.46E-01 | 21.38   | 17.84  | 2.31E-01 | 12.79   | 11.06 | 2.48E-01 | 6.53   | 13.65 | 6.32E-01 |
| cg12683929 | 11.79  | 5.48  | 3.16E-02 | 15.21  | 7.27  | 3.65E-02 | 5.92    | 15.45  | 7.02E-01 | 4.94    | 24.61 | 8.41E-01 | 8.41   | 10.82 | 4.37E-01 |
| cg02914087 | 28.01  | 13.03 | 3.16E-02 | 30.30  | 17.16 | 7.74E-02 | 17.92   | 59.76  | 7.64E-01 | 19.94   | 48.52 | 6.81E-01 | 27.14  | 23.61 | 2.50E-01 |
| cg17824173 | -21.56 | 10.03 | 3.16E-02 | -35.63 | 23.52 | 1.30E-01 | -133.57 | 78.79  | 9.00E-02 | -13.46  | 11.14 | 2.27E-01 | -34.82 | 30.49 | 2.53E-01 |
| cg10308749 | -7.30  | 3.39  | 3.16E-02 | -6.37  | 5.87  | 2.78E-01 | 4.11    | 9.58   | 6.68E-01 | -9.79   | 5.40  | 7.01E-02 | -12.51 | 8.89  | 1.59E-01 |
| cg13624833 | 9.16   | 4.26  | 3.16E-02 | 15.35  | 6.60  | 2.00E-02 | 7.35    | 9.90   | 4.58E-01 | 5.77    | 9.45  | 5.41E-01 | 1.13   | 9.69  | 9.07E-01 |
| cg06022179 | 12.43  | 5.78  | 3.16E-02 | 14.17  | 10.34 | 1.70E-01 | 15.11   | 15.42  | 3.27E-01 | 15.19   | 11.18 | 1.74E-01 | 6.48   | 10.93 | 5.53E-01 |
| cg01751245 | -5.71  | 2.66  | 3.16E-02 | -8.82  | 4.38  | 4.40E-02 | -0.87   | 6.03   | 8.86E-01 | -4.25   | 4.78  | 3.74E-01 | -7.59  | 7.38  | 3.03E-01 |

|            |        |       |          |        |       |          |         |        |          |        |       |          |        |       |          |
|------------|--------|-------|----------|--------|-------|----------|---------|--------|----------|--------|-------|----------|--------|-------|----------|
| cg05992395 | -14.56 | 6.77  | 3.16E-02 | -27.72 | 10.34 | 7.33E-03 | 2.34    | 11.47  | 8.38E-01 | -10.40 | 8.61  | 2.27E-01 | -25.70 | 14.77 | 8.18E-02 |
| cg13255398 | 9.72   | 4.52  | 3.16E-02 | 12.93  | 6.09  | 3.36E-02 | 12.95   | 11.89  | 2.76E-01 | 8.06   | 17.43 | 6.44E-01 | 0.72   | 9.30  | 9.38E-01 |
| cg06981279 | -9.94  | 4.62  | 3.16E-02 | -5.82  | 6.45  | 3.68E-01 | -9.81   | 10.69  | 3.59E-01 | -21.25 | 25.31 | 4.01E-01 | -16.54 | 8.95  | 6.47E-02 |
| cg05147143 | -11.40 | 5.30  | 3.16E-02 | -5.67  | 13.86 | 6.82E-01 | -33.18  | 28.43  | 2.43E-01 | -11.18 | 6.24  | 7.33E-02 | -13.89 | 17.04 | 4.15E-01 |
| cg08541649 | -9.52  | 4.43  | 3.16E-02 | -14.45 | 11.38 | 2.04E-01 | -8.61   | 23.01  | 7.08E-01 | -10.33 | 5.18  | 4.62E-02 | 6.54   | 15.54 | 6.74E-01 |
| cg08711063 | 13.32  | 6.20  | 3.16E-02 | 26.83  | 14.66 | 6.73E-02 | 27.73   | 18.85  | 1.41E-01 | 5.62   | 8.33  | 5.00E-01 | 15.13  | 15.50 | 3.29E-01 |
| cg14251777 | 24.04  | 11.18 | 3.16E-02 | 32.48  | 15.65 | 3.79E-02 | 9.61    | 38.72  | 8.04E-01 | 41.09  | 29.87 | 1.69E-01 | 3.34   | 21.69 | 8.78E-01 |
| cg24048517 | 12.75  | 5.93  | 3.16E-02 | 20.41  | 9.58  | 3.31E-02 | 21.25   | 12.85  | 9.84E-02 | -2.26  | 12.47 | 8.56E-01 | 5.15   | 14.07 | 7.14E-01 |
| cg08447934 | 13.13  | 6.11  | 3.16E-02 | 18.43  | 8.68  | 3.37E-02 | 14.46   | 13.19  | 2.73E-01 | 15.95  | 18.93 | 4.00E-01 | -4.07  | 14.15 | 7.74E-01 |
| cg08229018 | 15.25  | 7.09  | 3.16E-02 | 8.79   | 13.02 | 5.00E-01 | 15.96   | 22.10  | 4.70E-01 | 12.01  | 11.02 | 2.76E-01 | 32.38  | 16.46 | 4.91E-02 |
| cg16770400 | -9.65  | 4.49  | 3.16E-02 | -14.16 | 11.39 | 2.13E-01 | -9.93   | 21.11  | 6.38E-01 | -8.14  | 5.27  | 1.23E-01 | -14.96 | 16.64 | 3.69E-01 |
| cg07671752 | 9.31   | 4.33  | 3.16E-02 | 8.81   | 5.45  | 1.06E-01 | 6.47    | 10.66  | 5.44E-01 | 6.92   | 16.15 | 6.68E-01 | 16.55  | 11.93 | 1.65E-01 |
| cg27645955 | 17.54  | 8.16  | 3.16E-02 | 33.95  | 35.53 | 3.39E-01 | 92.46   | 149.37 | 5.36E-01 | 16.36  | 8.78  | 6.25E-02 | 16.65  | 28.68 | 5.62E-01 |
| cg23836594 | 9.33   | 4.34  | 3.16E-02 | 11.29  | 6.62  | 8.81E-02 | 15.42   | 8.84   | 8.12E-02 | 1.88   | 12.99 | 8.85E-01 | 2.52   | 9.32  | 7.86E-01 |
| cg14192299 | -4.38  | 2.04  | 3.16E-02 | -5.38  | 2.77  | 5.23E-02 | -4.53   | 4.47   | 3.12E-01 | 1.50   | 8.22  | 8.55E-01 | -3.27  | 4.64  | 4.81E-01 |
| cg10008589 | 12.91  | 6.01  | 3.16E-02 | 23.16  | 13.12 | 7.75E-02 | 23.25   | 16.93  | 1.70E-01 | 3.20   | 10.12 | 7.52E-01 | 12.83  | 10.76 | 2.33E-01 |
| cg14059988 | -26.38 | 12.27 | 3.16E-02 | -26.41 | 23.34 | 2.58E-01 | -97.91  | 59.55  | 1.00E-01 | -20.07 | 16.73 | 2.30E-01 | -28.78 | 32.50 | 3.76E-01 |
| cg19305511 | -35.43 | 16.49 | 3.16E-02 | -47.58 | 19.12 | 1.28E-02 | -10.87  | 72.43  | 8.81E-01 | 22.30  | 74.41 | 7.64E-01 | -3.70  | 41.82 | 9.29E-01 |
| cg10414946 | -11.98 | 5.58  | 3.16E-02 | -22.15 | 13.98 | 1.13E-01 | 4.07    | 16.59  | 8.06E-01 | -11.84 | 6.98  | 8.97E-02 | -15.17 | 18.63 | 4.15E-01 |
| cg01655958 | -9.26  | 4.31  | 3.16E-02 | -4.37  | 9.02  | 6.29E-01 | -18.20  | 16.93  | 2.82E-01 | -10.54 | 5.77  | 6.77E-02 | -8.09  | 11.17 | 4.69E-01 |
| cg01395127 | 6.18   | 2.88  | 3.16E-02 | 6.15   | 4.93  | 2.13E-01 | 5.02    | 6.41   | 4.34E-01 | 6.04   | 5.13  | 2.39E-01 | 8.21   | 7.60  | 2.80E-01 |
| cg15563070 | -11.50 | 5.35  | 3.16E-02 | -19.97 | 7.79  | 1.03E-02 | -4.05   | 13.29  | 7.60E-01 | -4.78  | 15.35 | 7.55E-01 | -3.37  | 10.86 | 7.57E-01 |
| cg12620942 | 23.93  | 11.13 | 3.16E-02 | 66.38  | 34.24 | 5.25E-02 | -25.02  | 128.74 | 8.46E-01 | 21.68  | 12.34 | 7.88E-02 | -7.91  | 41.49 | 8.49E-01 |
| cg02451774 | -4.45  | 2.07  | 3.16E-02 | -5.98  | 2.94  | 4.24E-02 | -4.51   | 5.15   | 3.81E-01 | -2.10  | 5.34  | 6.94E-01 | -2.32  | 4.73  | 6.24E-01 |
| cg13888662 | -18.80 | 8.75  | 3.17E-02 | -24.71 | 21.55 | 2.52E-01 | 19.93   | 34.73  | 5.66E-01 | -21.75 | 10.36 | 3.58E-02 | -8.20  | 36.31 | 8.21E-01 |
| cg02862467 | 5.36   | 2.50  | 3.17E-02 | 3.76   | 3.22  | 2.43E-01 | 12.07   | 6.04   | 4.59E-02 | 7.57   | 7.43  | 3.09E-01 | 1.66   | 7.36  | 8.22E-01 |
| cg04637454 | 9.32   | 4.34  | 3.17E-02 | 11.59  | 6.35  | 6.81E-02 | 5.48    | 10.91  | 6.15E-01 | 14.29  | 10.01 | 1.54E-01 | 1.96   | 10.01 | 8.45E-01 |
| cg00449756 | -24.39 | 11.35 | 3.17E-02 | -34.94 | 13.16 | 7.93E-03 | -23.33  | 50.02  | 6.41E-01 | -19.00 | 34.74 | 5.85E-01 | 20.72  | 29.24 | 4.78E-01 |
| cg23707590 | -8.76  | 4.08  | 3.17E-02 | -3.34  | 6.66  | 6.16E-01 | -5.44   | 12.40  | 6.61E-01 | -13.53 | 6.76  | 4.54E-02 | -13.07 | 10.43 | 2.10E-01 |
| cg00749220 | 19.47  | 9.06  | 3.17E-02 | 23.37  | 12.76 | 6.70E-02 | 26.15   | 19.88  | 1.88E-01 | 24.03  | 36.43 | 5.10E-01 | 3.37   | 19.05 | 8.60E-01 |
| cg16304950 | 22.44  | 10.45 | 3.17E-02 | 39.21  | 32.64 | 2.30E-01 | 31.21   | 29.13  | 2.84E-01 | 23.33  | 13.77 | 9.02E-02 | 5.09   | 23.75 | 8.30E-01 |
| cg07244927 | 5.01   | 2.33  | 3.17E-02 | 3.93   | 3.88  | 3.11E-01 | 5.45    | 4.86   | 2.62E-01 | 4.01   | 4.79  | 4.03E-01 | 8.11   | 5.65  | 1.51E-01 |
| cg08649099 | 65.02  | 30.26 | 3.17E-02 | 39.12  | 63.11 | 5.35E-01 | -119.83 | 302.52 | 6.92E-01 | 45.57  | 26.69 | 8.77E-02 | 172.47 | 66.64 | 9.65E-03 |
| cg03039990 | 8.98   | 4.18  | 3.17E-02 | 6.99   | 6.01  | 2.45E-01 | 17.07   | 10.36  | 9.96E-02 | 1.88   | 10.58 | 8.59E-01 | 12.84  | 9.42  | 1.73E-01 |
| cg06680511 | -10.86 | 5.05  | 3.17E-02 | -6.91  | 6.83  | 3.12E-01 | -12.14  | 10.86  | 2.64E-01 | -22.13 | 25.72 | 3.89E-01 | -18.16 | 11.36 | 1.10E-01 |

|            |        |       |          |        |       |          |        |        |          |        |       |          |        |       |          |
|------------|--------|-------|----------|--------|-------|----------|--------|--------|----------|--------|-------|----------|--------|-------|----------|
| cg19853143 | 6.50   | 3.03  | 3.17E-02 | 6.81   | 5.00  | 1.73E-01 | 4.99   | 5.45   | 3.59E-01 | 2.36   | 7.01  | 7.37E-01 | 14.64  | 8.14  | 7.19E-02 |
| cg06357908 | -8.43  | 3.92  | 3.17E-02 | -22.84 | 9.89  | 2.09E-02 | -9.51  | 11.81  | 4.20E-01 | -4.78  | 4.98  | 3.38E-01 | -7.34  | 11.74 | 5.32E-01 |
| cg22041988 | 32.20  | 14.99 | 3.17E-02 | 74.79  | 30.17 | 1.32E-02 | -87.15 | 115.25 | 4.50E-01 | 23.10  | 11.43 | 4.32E-02 | 27.75  | 44.24 | 5.31E-01 |
| cg27357232 | 20.88  | 9.72  | 3.17E-02 | 9.26   | 26.19 | 7.24E-01 | -8.62  | 78.04  | 9.12E-01 | 25.78  | 11.12 | 2.04E-02 | 0.53   | 33.81 | 9.88E-01 |
| cg22983827 | -10.92 | 5.08  | 3.17E-02 | -18.12 | 10.85 | 9.47E-02 | 1.43   | 20.00  | 9.43E-01 | -12.00 | 6.85  | 7.98E-02 | -2.57  | 12.50 | 8.37E-01 |
| cg04844120 | 18.49  | 8.61  | 3.17E-02 | 10.08  | 19.58 | 6.07E-01 | 21.08  | 63.39  | 7.39E-01 | 18.06  | 10.05 | 7.23E-02 | 53.26  | 36.87 | 1.49E-01 |
| cg04292159 | -16.01 | 7.45  | 3.17E-02 | -26.06 | 12.80 | 4.18E-02 | 3.59   | 14.65  | 8.06E-01 | -13.46 | 16.15 | 4.05E-01 | -27.59 | 17.09 | 1.07E-01 |
| cg05798125 | 31.87  | 14.83 | 3.17E-02 | 72.69  | 36.43 | 4.60E-02 | -74.16 | 144.11 | 6.07E-01 | 21.46  | 17.14 | 2.11E-01 | 60.60  | 54.26 | 2.64E-01 |
| cg26283879 | -18.22 | 8.48  | 3.17E-02 | -14.54 | 9.50  | 1.26E-01 | -17.39 | 34.11  | 6.10E-01 | -38.55 | 55.96 | 4.91E-01 | -39.25 | 24.55 | 1.10E-01 |
| cg10854819 | -3.78  | 1.76  | 3.17E-02 | -4.49  | 2.57  | 8.05E-02 | -3.39  | 3.01   | 2.60E-01 | 3.24   | 7.94  | 6.83E-01 | -4.76  | 4.66  | 3.07E-01 |
| cg20796611 | -6.97  | 3.24  | 3.17E-02 | -12.56 | 4.65  | 6.94E-03 | 1.32   | 6.80   | 8.46E-01 | -1.17  | 10.57 | 9.12E-01 | -6.69  | 5.96  | 2.62E-01 |
| cg01943155 | -10.57 | 4.92  | 3.17E-02 | -1.87  | 8.12  | 8.18E-01 | -26.52 | 11.16  | 1.75E-02 | -8.65  | 9.41  | 3.58E-01 | -12.35 | 9.69  | 2.02E-01 |
| cg20523861 | 6.32   | 2.94  | 3.17E-02 | 6.94   | 4.07  | 8.85E-02 | 1.41   | 7.24   | 8.45E-01 | -1.61  | 12.65 | 8.99E-01 | 9.83   | 5.77  | 8.83E-02 |
| cg27171569 | 2.85   | 1.33  | 3.17E-02 | 3.36   | 1.90  | 7.70E-02 | 4.34   | 2.80   | 1.21E-01 | 2.34   | 4.49  | 6.01E-01 | 0.18   | 2.94  | 9.52E-01 |
| cg14196263 | 7.32   | 3.41  | 3.17E-02 | 9.04   | 4.59  | 4.86E-02 | 14.39  | 9.59   | 1.34E-01 | -1.08  | 8.06  | 8.94E-01 | 4.92   | 9.03  | 5.86E-01 |
| cg27187555 | 9.30   | 4.33  | 3.17E-02 | 9.08   | 5.50  | 9.90E-02 | 21.92  | 10.07  | 2.94E-02 | 8.48   | 11.95 | 4.78E-01 | -4.69  | 11.21 | 6.75E-01 |
| cg00898111 | -9.63  | 4.48  | 3.17E-02 | -15.07 | 7.27  | 3.81E-02 | -0.68  | 10.44  | 9.48E-01 | -9.91  | 10.12 | 3.27E-01 | -7.63  | 9.16  | 4.05E-01 |
| cg03402351 | -5.22  | 2.43  | 3.17E-02 | -2.71  | 3.56  | 4.47E-01 | -2.99  | 6.15   | 6.27E-01 | -5.33  | 5.85  | 3.62E-01 | -12.51 | 5.36  | 1.96E-02 |
| cg09741342 | -42.43 | 19.75 | 3.17E-02 | -60.25 | 22.85 | 8.35E-03 | -30.03 | 91.82  | 7.44E-01 | 0.72   | 91.16 | 9.94E-01 | 24.95  | 49.50 | 6.14E-01 |
| cg11504081 | 31.57  | 14.70 | 3.17E-02 | 17.51  | 16.44 | 2.87E-01 | 78.45  | 63.34  | 2.16E-01 | 106.44 | 58.97 | 7.11E-02 | 46.65  | 33.79 | 1.67E-01 |
| cg00725388 | 31.07  | 14.46 | 3.17E-02 | 31.37  | 16.98 | 6.47E-02 | 66.38  | 60.84  | 2.75E-01 | -24.02 | 71.87 | 7.38E-01 | 31.16  | 34.31 | 3.64E-01 |
| cg13304825 | 7.87   | 3.66  | 3.17E-02 | 5.48   | 3.75  | 1.44E-01 | 15.79  | 7.85   | 4.43E-02 | 19.87  | 11.59 | 8.64E-02 | -2.04  | 10.00 | 8.38E-01 |
| cg12808596 | 11.17  | 5.20  | 3.17E-02 | 14.08  | 7.23  | 5.13E-02 | -3.08  | 10.94  | 7.78E-01 | 15.10  | 16.15 | 3.50E-01 | 19.77  | 13.35 | 1.38E-01 |
| cg19374305 | 3.64   | 1.70  | 3.17E-02 | 2.52   | 2.49  | 3.11E-01 | 0.89   | 3.36   | 7.90E-01 | 9.23   | 4.79  | 5.39E-02 | 7.03   | 4.32  | 1.04E-01 |
| cg02278499 | 16.47  | 7.67  | 3.17E-02 | 13.17  | 11.67 | 2.59E-01 | 22.74  | 21.74  | 2.96E-01 | 27.68  | 24.18 | 2.52E-01 | 15.06  | 13.09 | 2.50E-01 |
| cg07931792 | -50.06 | 23.31 | 3.17E-02 | -47.18 | 24.72 | 5.63E-02 | 83.21  | 80.24  | 3.00E-01 | -64.24 | 52.11 | 2.18E-01 | -89.49 | 42.31 | 3.44E-02 |
| cg24686551 | 6.33   | 2.95  | 3.17E-02 | 6.44   | 3.84  | 9.33E-02 | 10.92  | 7.68   | 1.55E-01 | 7.31   | 9.71  | 4.52E-01 | 1.47   | 7.12  | 8.36E-01 |
| cg24919768 | 7.31   | 3.41  | 3.17E-02 | 4.00   | 5.00  | 4.24E-01 | 1.81   | 6.18   | 7.70E-01 | 18.67  | 9.58  | 5.12E-02 | 13.06  | 6.60  | 4.77E-02 |
| cg15557144 | 13.10  | 6.10  | 3.17E-02 | 0.56   | 12.85 | 9.65E-01 | 29.50  | 14.38  | 4.03E-02 | 15.41  | 8.93  | 8.44E-02 | 3.74   | 17.00 | 8.26E-01 |
| cg17846016 | 4.46   | 2.08  | 3.17E-02 | 3.75   | 2.54  | 1.40E-01 | 7.00   | 5.24   | 1.82E-01 | 9.19   | 7.10  | 1.96E-01 | 0.83   | 6.85  | 9.03E-01 |
| cg16250812 | -9.69  | 4.51  | 3.17E-02 | -7.21  | 9.09  | 4.28E-01 | -1.86  | 11.93  | 8.76E-01 | -8.01  | 6.57  | 2.23E-01 | -27.76 | 12.08 | 2.15E-02 |
| cg15225325 | 5.38   | 2.50  | 3.17E-02 | 2.93   | 3.43  | 3.93E-01 | 13.54  | 6.06   | 2.54E-02 | 5.15   | 5.96  | 3.88E-01 | 4.94   | 7.20  | 4.93E-01 |
| cg10211193 | -7.30  | 3.40  | 3.17E-02 | -9.62  | 5.91  | 1.04E-01 | -5.66  | 9.83   | 5.65E-01 | -8.23  | 5.53  | 1.37E-01 | -1.97  | 8.15  | 8.09E-01 |
| cg27343325 | -12.19 | 5.68  | 3.18E-02 | -17.65 | 8.80  | 4.49E-02 | -4.13  | 11.90  | 7.29E-01 | -18.47 | 17.69 | 2.96E-01 | -7.91  | 11.27 | 4.83E-01 |
| cg01855636 | 12.38  | 5.76  | 3.18E-02 | 15.54  | 11.29 | 1.69E-01 | -10.75 | 24.16  | 6.56E-01 | 12.29  | 7.63  | 1.07E-01 | 17.20  | 17.23 | 3.18E-01 |

|            |        |       |          |        |       |          |        |        |          |        |       |          |        |       |          |
|------------|--------|-------|----------|--------|-------|----------|--------|--------|----------|--------|-------|----------|--------|-------|----------|
| cg27171201 | 15.21  | 7.08  | 3.18E-02 | 18.37  | 12.14 | 1.30E-01 | 15.40  | 13.92  | 2.68E-01 | 1.73   | 14.05 | 9.02E-01 | 30.91  | 18.49 | 9.47E-02 |
| cg26923410 | -25.52 | 11.88 | 3.18E-02 | -29.47 | 18.19 | 1.05E-01 | -19.41 | 32.85  | 5.55E-01 | -61.31 | 32.04 | 5.57E-02 | -6.46  | 21.53 | 7.64E-01 |
| cg21714557 | -8.20  | 3.82  | 3.18E-02 | -8.16  | 6.19  | 1.87E-01 | -1.93  | 7.70   | 8.02E-01 | -9.57  | 11.08 | 3.88E-01 | -13.66 | 7.56  | 7.09E-02 |
| cg00808370 | -12.67 | 5.90  | 3.18E-02 | -25.86 | 15.22 | 8.93E-02 | -33.29 | 25.91  | 1.99E-01 | -8.55  | 6.96  | 2.19E-01 | -11.52 | 20.96 | 5.83E-01 |
| cg18764577 | 12.22  | 5.69  | 3.18E-02 | 33.39  | 15.37 | 2.98E-02 | 8.60   | 20.69  | 6.78E-01 | 12.67  | 7.96  | 1.11E-01 | 1.84   | 10.85 | 8.65E-01 |
| cg14752451 | 18.70  | 8.71  | 3.18E-02 | 20.48  | 10.92 | 6.07E-02 | 42.90  | 29.74  | 1.49E-01 | -9.05  | 33.27 | 7.86E-01 | 12.46  | 19.02 | 5.13E-01 |
| cg00746143 | 13.50  | 6.28  | 3.18E-02 | 9.43   | 17.00 | 5.79E-01 | -37.60 | 34.20  | 2.72E-01 | 17.07  | 7.26  | 1.87E-02 | 8.57   | 22.18 | 6.99E-01 |
| cg25527090 | 11.69  | 5.44  | 3.18E-02 | 25.34  | 11.80 | 3.17E-02 | 6.75   | 12.95  | 6.02E-01 | 6.99   | 8.59  | 4.16E-01 | 10.96  | 11.90 | 3.57E-01 |
| cg03917521 | -26.99 | 12.57 | 3.18E-02 | -29.82 | 15.22 | 5.00E-02 | -72.94 | 34.48  | 3.44E-02 | -27.85 | 52.65 | 5.97E-01 | 0.57   | 23.02 | 9.80E-01 |
| cg21935519 | 9.01   | 4.20  | 3.18E-02 | 15.84  | 8.13  | 5.13E-02 | 3.34   | 9.52   | 7.26E-01 | 9.65   | 7.06  | 1.72E-01 | 3.93   | 9.74  | 6.87E-01 |
| cg25947283 | -14.80 | 6.89  | 3.18E-02 | -21.24 | 10.93 | 5.20E-02 | -20.22 | 19.73  | 3.05E-01 | -17.19 | 13.25 | 1.94E-01 | 3.67   | 15.07 | 8.08E-01 |
| cg16219283 | -6.55  | 3.05  | 3.18E-02 | -6.35  | 3.93  | 1.06E-01 | -11.40 | 9.72   | 2.41E-01 | -8.22  | 10.49 | 4.33E-01 | -4.23  | 6.56  | 5.19E-01 |
| cg11293241 | 6.03   | 2.81  | 3.18E-02 | 6.79   | 5.25  | 1.95E-01 | 5.65   | 4.30   | 1.89E-01 | 11.49  | 6.80  | 9.13E-02 | -2.39  | 8.21  | 7.70E-01 |
| cg13244241 | -29.42 | 13.70 | 3.18E-02 | -46.21 | 22.53 | 4.03E-02 | 12.51  | 48.27  | 7.95E-01 | -31.39 | 22.61 | 1.65E-01 | -9.90  | 32.10 | 7.58E-01 |
| cg26996703 | 9.68   | 4.51  | 3.18E-02 | 16.08  | 7.07  | 2.29E-02 | -4.94  | 11.09  | 6.56E-01 | 7.48   | 13.17 | 5.70E-01 | 9.91   | 8.09  | 2.21E-01 |
| cg26562772 | 6.91   | 3.22  | 3.18E-02 | 7.17   | 4.93  | 1.46E-01 | 8.91   | 7.78   | 2.53E-01 | 6.47   | 6.17  | 2.94E-01 | 4.38   | 8.87  | 6.22E-01 |
| cg03722472 | 18.72  | 8.72  | 3.18E-02 | 11.90  | 14.43 | 4.10E-01 | 26.45  | 17.37  | 1.28E-01 | 16.08  | 20.82 | 4.40E-01 | 23.55  | 19.12 | 2.18E-01 |
| cg15008124 | 13.64  | 6.36  | 3.18E-02 | 19.07  | 17.74 | 2.82E-01 | 41.90  | 27.50  | 1.28E-01 | 13.10  | 7.26  | 7.11E-02 | -20.71 | 27.84 | 4.57E-01 |
| cg04129227 | -30.82 | 14.36 | 3.18E-02 | 1.95   | 40.28 | 9.61E-01 | 26.02  | 244.10 | 9.15E-01 | -35.24 | 15.94 | 2.71E-02 | -44.14 | 59.36 | 4.57E-01 |
| cg26810908 | -8.80  | 4.10  | 3.18E-02 | -11.45 | 9.18  | 2.12E-01 | 11.08  | 14.07  | 4.31E-01 | -9.54  | 5.33  | 7.34E-02 | -14.53 | 11.60 | 2.10E-01 |
| cg03174933 | -13.79 | 6.42  | 3.18E-02 | -12.35 | 11.26 | 2.73E-01 | 6.12   | 16.68  | 7.14E-01 | -23.87 | 7.55  | 1.56E-03 | -2.31  | 15.98 | 8.85E-01 |
| cg26912671 | 15.01  | 6.99  | 3.18E-02 | 24.00  | 18.46 | 1.94E-01 | -0.22  | 29.11  | 9.94E-01 | 15.55  | 8.20  | 5.80E-02 | 3.92   | 25.93 | 8.80E-01 |
| cg20689978 | -16.60 | 7.73  | 3.18E-02 | -13.97 | 12.96 | 2.81E-01 | -32.81 | 18.16  | 7.07E-02 | -3.91  | 13.28 | 7.68E-01 | -35.31 | 22.04 | 1.09E-01 |
| cg04229842 | 21.78  | 10.15 | 3.18E-02 | 19.46  | 11.89 | 1.02E-01 | 29.27  | 36.60  | 4.24E-01 | 48.25  | 63.73 | 4.49E-01 | 24.38  | 24.63 | 3.22E-01 |
| cg14805932 | 15.38  | 7.17  | 3.18E-02 | 5.42   | 16.93 | 7.49E-01 | 32.12  | 17.66  | 6.90E-02 | 20.21  | 11.89 | 8.91E-02 | 6.09   | 13.24 | 6.45E-01 |
| cg00043564 | 10.07  | 4.69  | 3.18E-02 | 11.75  | 7.38  | 1.11E-01 | 17.00  | 14.06  | 2.26E-01 | 5.53   | 9.98  | 5.79E-01 | 8.37   | 9.14  | 3.60E-01 |
| cg09977288 | -5.41  | 2.52  | 3.18E-02 | -3.65  | 4.94  | 4.60E-01 | 0.75   | 7.33   | 9.18E-01 | -7.47  | 3.75  | 4.62E-02 | -6.89  | 6.11  | 2.60E-01 |
| cg05172940 | 12.43  | 5.79  | 3.18E-02 | 13.46  | 8.10  | 9.64E-02 | 7.85   | 12.64  | 5.35E-01 | 4.87   | 19.74 | 8.05E-01 | 18.09  | 13.21 | 1.71E-01 |
| cg23075968 | 9.14   | 4.26  | 3.18E-02 | 13.22  | 5.75  | 2.15E-02 | 12.60  | 9.37   | 1.79E-01 | -9.35  | 11.25 | 4.06E-01 | 9.23   | 8.40  | 2.71E-01 |
| cg09389557 | -14.76 | 6.88  | 3.18E-02 | -25.60 | 18.26 | 1.61E-01 | 13.33  | 24.54  | 5.87E-01 | -17.55 | 8.11  | 3.04E-02 | 7.64   | 28.13 | 7.86E-01 |
| cg02806156 | 4.76   | 2.22  | 3.18E-02 | 5.00   | 2.93  | 8.78E-02 | 8.32   | 5.49   | 1.29E-01 | 3.06   | 5.87  | 6.03E-01 | 0.84   | 6.34  | 8.94E-01 |
| cg18088056 | 18.35  | 8.55  | 3.18E-02 | 11.40  | 13.47 | 3.97E-01 | 40.41  | 16.84  | 1.64E-02 | 9.32   | 18.92 | 6.22E-01 | 10.64  | 23.25 | 6.47E-01 |
| cg04956382 | -9.93  | 4.63  | 3.18E-02 | -16.65 | 8.98  | 6.38E-02 | -12.94 | 13.31  | 3.31E-01 | -5.37  | 6.51  | 4.09E-01 | -11.37 | 14.05 | 4.18E-01 |
| cg01432055 | -8.41  | 3.92  | 3.18E-02 | -8.62  | 7.99  | 2.81E-01 | -28.20 | 29.25  | 3.35E-01 | -6.74  | 4.92  | 1.71E-01 | -14.53 | 11.95 | 2.24E-01 |
| cg07918846 | 37.00  | 17.24 | 3.18E-02 | 37.96  | 18.94 | 4.51E-02 | 25.93  | 35.61  | 4.67E-01 | 9.00   | 15.53 | 5.62E-01 | 94.90  | 30.45 | 1.83E-03 |

|            |        |       |          |        |       |          |        |        |          |         |       |          |        |       |          |
|------------|--------|-------|----------|--------|-------|----------|--------|--------|----------|---------|-------|----------|--------|-------|----------|
| cg16818725 | 5.06   | 2.36  | 3.18E-02 | 4.74   | 3.35  | 1.57E-01 | 3.74   | 5.24   | 4.76E-01 | 11.86   | 7.44  | 1.11E-01 | 3.79   | 5.23  | 4.69E-01 |
| cg01663570 | -28.85 | 13.44 | 3.19E-02 | -26.25 | 19.21 | 1.72E-01 | -72.99 | 37.72  | 5.30E-02 | -24.43  | 29.99 | 4.15E-01 | -9.98  | 31.46 | 7.51E-01 |
| cg10319904 | -41.28 | 19.23 | 3.19E-02 | -55.39 | 22.94 | 1.58E-02 | -58.11 | 89.06  | 5.14E-01 | -4.30   | 66.57 | 9.48E-01 | 4.34   | 47.07 | 9.26E-01 |
| cg16378063 | 4.56   | 2.12  | 3.19E-02 | 4.09   | 2.84  | 1.51E-01 | 9.08   | 4.62   | 4.96E-02 | 5.09    | 5.99  | 3.96E-01 | -2.58  | 6.51  | 6.92E-01 |
| cg01956154 | -19.53 | 9.10  | 3.19E-02 | -3.52  | 9.63  | 7.15E-01 | -23.64 | 18.56  | 2.03E-01 | -45.75  | 20.87 | 2.84E-02 | -26.91 | 14.87 | 7.03E-02 |
| cg00415993 | 7.19   | 3.35  | 3.19E-02 | 6.47   | 4.46  | 1.47E-01 | 15.12  | 8.29   | 6.81E-02 | 13.00   | 8.75  | 1.38E-01 | -3.55  | 8.28  | 6.68E-01 |
| cg02474926 | 14.68  | 6.84  | 3.19E-02 | 27.59  | 17.58 | 1.17E-01 | 20.59  | 33.81  | 5.43E-01 | 10.67   | 8.02  | 1.84E-01 | 23.51  | 24.02 | 3.28E-01 |
| cg22188058 | 41.05  | 19.13 | 3.19E-02 | -8.34  | 53.03 | 8.75E-01 | 26.39  | 200.64 | 8.95E-01 | 52.93   | 21.95 | 1.59E-02 | 16.87  | 59.95 | 7.78E-01 |
| cg19624299 | 8.87   | 4.14  | 3.19E-02 | 18.04  | 7.49  | 1.60E-02 | 7.67   | 6.84   | 2.62E-01 | 2.28    | 8.82  | 7.96E-01 | 0.63   | 12.48 | 9.60E-01 |
| cg13602242 | -28.10 | 13.09 | 3.19E-02 | -14.90 | 14.96 | 3.19E-01 | -58.63 | 38.91  | 1.32E-01 | -101.95 | 54.51 | 6.14E-02 | -30.17 | 26.17 | 2.49E-01 |
| cg10075260 | 14.11  | 6.57  | 3.19E-02 | 21.87  | 16.88 | 1.95E-01 | 11.38  | 39.01  | 7.71E-01 | 10.62   | 7.58  | 1.61E-01 | 36.75  | 25.34 | 1.47E-01 |
| cg25641145 | -9.57  | 4.46  | 3.19E-02 | -6.95  | 5.76  | 2.28E-01 | -3.13  | 7.31   | 6.69E-01 | -5.23   | 13.34 | 6.95E-01 | -23.03 | 8.03  | 4.12E-03 |
| cg02851047 | 16.75  | 7.80  | 3.19E-02 | 4.37   | 13.74 | 7.51E-01 | 17.58  | 13.41  | 1.90E-01 | 31.97   | 18.55 | 8.47E-02 | 23.02  | 19.40 | 2.35E-01 |
| cg00565348 | 15.29  | 7.13  | 3.19E-02 | 2.13   | 11.30 | 8.51E-01 | 18.35  | 18.70  | 3.26E-01 | 16.25   | 19.54 | 4.05E-01 | 29.69  | 12.52 | 1.77E-02 |
| cg10446433 | -11.55 | 5.38  | 3.19E-02 | -13.55 | 14.06 | 3.35E-01 | -40.05 | 25.80  | 1.21E-01 | -8.29   | 6.22  | 1.83E-01 | -26.25 | 21.70 | 2.26E-01 |
| cg15737554 | 13.84  | 6.45  | 3.19E-02 | 22.55  | 17.51 | 1.98E-01 | 12.92  | 22.68  | 5.69E-01 | 14.25   | 7.62  | 6.14E-02 | -6.98  | 24.83 | 7.79E-01 |
| cg09714114 | -13.13 | 6.12  | 3.19E-02 | -35.85 | 16.31 | 2.79E-02 | -8.92  | 31.06  | 7.74E-01 | -10.27  | 7.03  | 1.44E-01 | 0.73   | 24.45 | 9.76E-01 |
| cg23912081 | 8.16   | 3.80  | 3.19E-02 | 4.75   | 4.49  | 2.90E-01 | 11.95  | 6.78   | 7.81E-02 | 24.77   | 10.65 | 2.00E-02 | 2.38   | 6.79  | 7.26E-01 |
| cg00041989 | 8.21   | 3.82  | 3.19E-02 | 9.32   | 5.23  | 7.51E-02 | 9.01   | 8.94   | 3.14E-01 | 13.28   | 9.78  | 1.74E-01 | -3.43  | 10.59 | 7.46E-01 |
| cg13153394 | -40.11 | 18.69 | 3.19E-02 | -79.72 | 53.08 | 1.33E-01 | 321.57 | 277.14 | 2.46E-01 | -40.16  | 20.96 | 5.54E-02 | 3.44   | 67.91 | 9.60E-01 |
| cg18030453 | 11.56  | 5.39  | 3.19E-02 | 12.85  | 7.57  | 8.96E-02 | 13.12  | 13.00  | 3.13E-01 | 7.81    | 12.94 | 5.46E-01 | 9.74   | 13.99 | 4.86E-01 |
| cg09010323 | -20.89 | 9.74  | 3.19E-02 | -31.75 | 13.77 | 2.11E-02 | -14.28 | 25.75  | 5.79E-01 | -2.25   | 23.81 | 9.25E-01 | -13.68 | 22.36 | 5.41E-01 |
| cg05028187 | -19.03 | 8.87  | 3.19E-02 | -34.36 | 22.09 | 1.20E-01 | -75.95 | 76.35  | 3.20E-01 | -14.41  | 10.17 | 1.57E-01 | -23.30 | 34.81 | 5.03E-01 |
| cg24029414 | 33.59  | 15.65 | 3.19E-02 | 25.50  | 19.34 | 1.87E-01 | -19.34 | 72.22  | 7.89E-01 | 12.15   | 57.38 | 8.32E-01 | 75.55  | 33.11 | 2.25E-02 |
| cg07443717 | -14.25 | 6.64  | 3.19E-02 | -27.77 | 16.14 | 8.53E-02 | -0.31  | 35.78  | 9.93E-01 | -13.41  | 7.85  | 8.74E-02 | 0.89   | 23.54 | 9.70E-01 |
| cg08797242 | 22.42  | 10.45 | 3.19E-02 | 25.61  | 12.51 | 4.06E-02 | 70.76  | 35.40  | 4.56E-02 | -5.04   | 57.19 | 9.30E-01 | 3.32   | 19.51 | 8.65E-01 |
| cg05098343 | -9.21  | 4.29  | 3.19E-02 | -12.14 | 7.30  | 9.63E-02 | -9.00  | 10.19  | 3.77E-01 | -4.18   | 8.34  | 6.16E-01 | -10.88 | 9.32  | 2.43E-01 |
| cg25376491 | 10.11  | 4.71  | 3.19E-02 | 5.90   | 8.27  | 4.76E-01 | 7.61   | 10.81  | 4.81E-01 | 10.90   | 7.63  | 1.53E-01 | 24.99  | 14.63 | 8.76E-02 |
| cg10334885 | 13.19  | 6.15  | 3.19E-02 | 15.88  | 8.25  | 5.41E-02 | 9.41   | 9.89   | 3.41E-01 | -2.03   | 13.25 | 8.78E-01 | 37.86  | 17.14 | 2.72E-02 |
| cg16932017 | 30.28  | 14.11 | 3.19E-02 | 18.51  | 18.93 | 3.28E-01 | 4.61   | 42.78  | 9.14E-01 | 30.00   | 46.77 | 5.21E-01 | 68.54  | 28.54 | 1.63E-02 |
| cg03655395 | 8.27   | 3.85  | 3.19E-02 | 8.61   | 6.26  | 1.69E-01 | 3.74   | 6.37   | 5.57E-01 | 25.85   | 11.65 | 2.65E-02 | 5.53   | 10.13 | 5.85E-01 |
| cg01698108 | -33.72 | 15.72 | 3.19E-02 | -45.22 | 51.20 | 3.77E-01 | 86.33  | 203.34 | 6.71E-01 | -29.33  | 17.37 | 9.14E-02 | -73.60 | 55.22 | 1.83E-01 |
| cg14794487 | -14.86 | 6.93  | 3.19E-02 | -26.28 | 20.30 | 1.95E-01 | 25.96  | 38.74  | 5.03E-01 | -14.82  | 7.88  | 5.99E-02 | -15.00 | 24.87 | 5.46E-01 |
| cg04120407 | 35.35  | 16.48 | 3.19E-02 | 44.25  | 19.84 | 2.57E-02 | 133.45 | 87.54  | 1.27E-01 | -9.39   | 63.30 | 8.82E-01 | 3.47   | 36.24 | 9.24E-01 |
| cg06631310 | 12.16  | 5.67  | 3.19E-02 | 8.79   | 8.49  | 3.01E-01 | 30.27  | 13.10  | 2.08E-02 | 1.30    | 13.21 | 9.22E-01 | 12.76  | 13.25 | 3.35E-01 |

|            |        |       |          |        |       |          |        |        |          |         |       |          |        |       |          |
|------------|--------|-------|----------|--------|-------|----------|--------|--------|----------|---------|-------|----------|--------|-------|----------|
| cg20659941 | -8.33  | 3.88  | 3.19E-02 | -3.36  | 7.52  | 6.55E-01 | -9.34  | 9.36   | 3.18E-01 | -10.88  | 5.75  | 5.83E-02 | -8.19  | 11.99 | 4.94E-01 |
| cg26968203 | -38.40 | 17.90 | 3.19E-02 | -38.27 | 25.62 | 1.35E-01 | 11.95  | 77.71  | 8.78E-01 | -17.99  | 81.91 | 8.26E-01 | -47.44 | 27.93 | 8.94E-02 |
| cg13891702 | -24.00 | 11.19 | 3.19E-02 | -14.27 | 10.49 | 1.74E-01 | -61.50 | 17.63  | 4.84E-04 | -1.09   | 23.62 | 9.63E-01 | -18.98 | 13.40 | 1.57E-01 |
| cg22240717 | 5.83   | 2.72  | 3.19E-02 | 4.50   | 3.66  | 2.18E-01 | 6.32   | 6.14   | 3.03E-01 | 15.22   | 11.31 | 1.78E-01 | 6.34   | 6.18  | 3.06E-01 |
| cg00055341 | 9.22   | 4.30  | 3.19E-02 | 4.44   | 6.17  | 4.72E-01 | 23.89  | 10.74  | 2.61E-02 | 14.02   | 9.49  | 1.40E-01 | 3.28   | 10.06 | 7.45E-01 |
| cg13105904 | -4.60  | 2.15  | 3.19E-02 | -6.37  | 3.06  | 3.72E-02 | -8.86  | 5.96   | 1.37E-01 | -0.76   | 5.26  | 8.84E-01 | -0.91  | 4.65  | 8.45E-01 |
| cg15675123 | -9.22  | 4.30  | 3.19E-02 | -16.49 | 11.54 | 1.53E-01 | -10.07 | 15.66  | 5.20E-01 | -8.12   | 5.08  | 1.10E-01 | -5.16  | 16.24 | 7.51E-01 |
| cg19855559 | -8.40  | 3.92  | 3.19E-02 | -9.38  | 8.03  | 2.43E-01 | -7.75  | 10.50  | 4.60E-01 | -4.89   | 5.41  | 3.66E-01 | -25.33 | 12.39 | 4.09E-02 |
| cg24678869 | 15.52  | 7.24  | 3.19E-02 | 24.39  | 10.80 | 2.39E-02 | 12.77  | 13.97  | 3.60E-01 | 4.82    | 21.43 | 8.22E-01 | 3.48   | 17.65 | 8.44E-01 |
| cg24202916 | -9.30  | 4.34  | 3.20E-02 | -8.89  | 6.75  | 1.88E-01 | -1.52  | 10.01  | 8.79E-01 | -3.18   | 9.36  | 7.34E-01 | -22.47 | 9.17  | 1.42E-02 |
| cg15500841 | -7.19  | 3.35  | 3.20E-02 | -13.28 | 6.46  | 3.97E-02 | 4.35   | 12.16  | 7.21E-01 | -6.10   | 4.51  | 1.76E-01 | -5.57  | 10.50 | 5.96E-01 |
| cg12459028 | -10.36 | 4.83  | 3.20E-02 | -15.37 | 6.79  | 2.37E-02 | -5.11  | 11.18  | 6.48E-01 | -5.50   | 19.82 | 7.81E-01 | -5.27  | 9.70  | 5.87E-01 |
| cg23674788 | 20.61  | 9.61  | 3.20E-02 | 13.77  | 15.16 | 3.64E-01 | 27.40  | 21.36  | 2.00E-01 | 7.36    | 21.57 | 7.33E-01 | 40.84  | 21.61 | 5.88E-02 |
| cg05264870 | 8.84   | 4.12  | 3.20E-02 | 13.36  | 5.02  | 7.81E-03 | 12.97  | 8.35   | 1.20E-01 | 7.35    | 9.40  | 4.34E-01 | -5.69  | 9.02  | 5.28E-01 |
| cg00096419 | 37.09  | 17.29 | 3.20E-02 | 57.99  | 21.83 | 7.90E-03 | 53.71  | 44.21  | 2.24E-01 | 5.51    | 14.93 | 7.12E-01 | 61.79  | 33.96 | 6.88E-02 |
| cg03761885 | 10.15  | 4.73  | 3.20E-02 | 17.62  | 9.66  | 6.82E-02 | 3.92   | 17.42  | 8.22E-01 | 5.70    | 6.38  | 3.71E-01 | 18.39  | 12.86 | 1.53E-01 |
| cg07015511 | 20.58  | 9.59  | 3.20E-02 | 12.57  | 16.63 | 4.50E-01 | 14.01  | 19.01  | 4.61E-01 | 28.02   | 19.39 | 1.48E-01 | 35.60  | 23.44 | 1.29E-01 |
| cg13763952 | 22.47  | 10.48 | 3.20E-02 | 15.85  | 16.02 | 3.22E-01 | 55.76  | 24.49  | 2.28E-02 | 7.98    | 22.10 | 7.18E-01 | 22.44  | 25.86 | 3.86E-01 |
| cg05364326 | 30.29  | 14.12 | 3.20E-02 | 89.81  | 40.09 | 2.51E-02 | -36.47 | 135.93 | 7.88E-01 | 21.89   | 15.89 | 1.68E-01 | 29.92  | 51.63 | 5.62E-01 |
| cg13679842 | -9.08  | 4.23  | 3.20E-02 | -17.86 | 8.97  | 4.64E-02 | -10.73 | 17.87  | 5.48E-01 | -9.25   | 5.51  | 9.36E-02 | 7.19   | 11.64 | 5.37E-01 |
| cg12308631 | 26.90  | 12.54 | 3.20E-02 | 35.74  | 19.02 | 6.03E-02 | 2.46   | 19.01  | 8.97E-01 | 16.69   | 18.56 | 3.68E-01 | 67.59  | 26.15 | 9.74E-03 |
| cg20228119 | 39.14  | 18.25 | 3.20E-02 | 109.61 | 57.39 | 5.61E-02 | -95.41 | 225.76 | 6.73E-01 | 32.11   | 20.49 | 1.17E-01 | 32.36  | 58.02 | 5.77E-01 |
| cg02557755 | 49.07  | 22.88 | 3.20E-02 | 92.73  | 48.51 | 5.59E-02 | -92.51 | 249.29 | 7.11E-01 | 37.86   | 28.12 | 1.78E-01 | 38.77  | 70.11 | 5.80E-01 |
| cg08901157 | -8.90  | 4.15  | 3.20E-02 | -5.49  | 5.95  | 3.56E-01 | -14.86 | 11.17  | 1.83E-01 | -17.32  | 9.55  | 6.97E-02 | -4.85  | 9.64  | 6.15E-01 |
| cg08352115 | 9.59   | 4.47  | 3.20E-02 | 14.46  | 6.55  | 2.72E-02 | 5.76   | 9.97   | 5.63E-01 | 14.18   | 9.58  | 1.39E-01 | -7.79  | 11.92 | 5.13E-01 |
| cg26378593 | 23.90  | 11.15 | 3.20E-02 | 25.92  | 37.35 | 4.88E-01 | -1.47  | 134.75 | 9.91E-01 | 27.67   | 12.05 | 2.16E-02 | -43.66 | 50.97 | 3.92E-01 |
| cg16361947 | 13.54  | 6.31  | 3.20E-02 | 0.54   | 16.27 | 9.74E-01 | 11.35  | 22.64  | 6.16E-01 | 19.67   | 6.10  | 1.26E-03 | -14.18 | 21.40 | 5.07E-01 |
| cg18594332 | -11.14 | 5.20  | 3.20E-02 | 4.26   | 11.14 | 7.02E-01 | -20.44 | 17.61  | 2.46E-01 | -13.64  | 6.76  | 4.36E-02 | -21.40 | 16.13 | 1.85E-01 |
| cg23340017 | 17.35  | 8.09  | 3.20E-02 | 20.65  | 14.69 | 1.60E-01 | 24.07  | 22.15  | 2.77E-01 | 17.24   | 17.01 | 3.11E-01 | 11.80  | 13.95 | 3.97E-01 |
| cg12873037 | -48.21 | 22.48 | 3.20E-02 | -39.43 | 29.84 | 1.86E-01 | 99.17  | 105.70 | 3.48E-01 | -101.31 | 49.29 | 3.98E-02 | -49.89 | 41.89 | 2.34E-01 |
| cg09837648 | 19.90  | 9.28  | 3.20E-02 | 9.90   | 19.66 | 6.15E-01 | 21.74  | 15.01  | 1.48E-01 | 7.02    | 16.95 | 6.79E-01 | 56.92  | 24.56 | 2.05E-02 |
| cg12080675 | 11.89  | 5.55  | 3.20E-02 | 24.92  | 15.22 | 1.02E-01 | 39.57  | 30.72  | 1.98E-01 | 12.80   | 7.20  | 7.57E-02 | -1.20  | 11.28 | 9.15E-01 |
| cg03293015 | 15.56  | 7.26  | 3.20E-02 | 31.79  | 10.67 | 2.88E-03 | 3.88   | 16.14  | 8.10E-01 | 17.55   | 17.06 | 3.04E-01 | 5.31   | 10.11 | 5.99E-01 |
| cg04340258 | 6.11   | 2.85  | 3.20E-02 | 3.73   | 3.46  | 2.81E-01 | 14.91  | 7.99   | 6.19E-02 | 8.59    | 9.10  | 3.45E-01 | 8.80   | 9.25  | 3.42E-01 |
| cg03432176 | 6.66   | 3.10  | 3.20E-02 | 7.63   | 4.34  | 7.86E-02 | 5.63   | 6.49   | 3.86E-01 | 17.43   | 12.81 | 1.74E-01 | 2.18   | 6.93  | 7.52E-01 |

|            |        |       |          |        |       |          |        |        |          |        |       |          |        |       |          |
|------------|--------|-------|----------|--------|-------|----------|--------|--------|----------|--------|-------|----------|--------|-------|----------|
| cg19503977 | 18.39  | 8.58  | 3.20E-02 | 27.60  | 13.63 | 4.28E-02 | 19.93  | 21.06  | 3.44E-01 | 32.81  | 23.84 | 1.69E-01 | -0.31  | 15.44 | 9.84E-01 |
| cg14908170 | 9.15   | 4.27  | 3.20E-02 | 6.78   | 6.27  | 2.80E-01 | 13.66  | 8.66   | 1.15E-01 | 5.17   | 15.21 | 7.34E-01 | 10.63  | 9.21  | 2.49E-01 |
| cg22214498 | 18.38  | 8.57  | 3.20E-02 | 18.79  | 13.96 | 1.78E-01 | 4.23   | 15.91  | 7.91E-01 | 26.02  | 19.91 | 1.91E-01 | 35.62  | 22.35 | 1.11E-01 |
| cg27158308 | 25.75  | 12.01 | 3.20E-02 | 34.93  | 30.70 | 2.55E-01 | 93.60  | 127.04 | 4.61E-01 | 30.59  | 9.97  | 2.15E-03 | -40.35 | 40.19 | 3.15E-01 |
| cg16611584 | 5.24   | 2.45  | 3.20E-02 | 8.47   | 3.37  | 1.21E-02 | 4.69   | 5.42   | 3.87E-01 | 1.66   | 7.61  | 8.27E-01 | -1.99  | 5.98  | 7.39E-01 |
| cg09284275 | 6.13   | 2.86  | 3.20E-02 | 6.05   | 3.57  | 9.03E-02 | 15.91  | 7.97   | 4.59E-02 | -0.47  | 8.79  | 9.58E-01 | 2.03   | 8.16  | 8.03E-01 |
| cg08520742 | 19.60  | 9.14  | 3.20E-02 | 32.06  | 15.98 | 4.48E-02 | 16.31  | 16.06  | 3.10E-01 | 6.81   | 21.73 | 7.54E-01 | 15.22  | 22.10 | 4.91E-01 |
| cg01294253 | 18.52  | 8.64  | 3.21E-02 | 1.92   | 16.39 | 9.07E-01 | 29.22  | 15.73  | 6.33E-02 | 16.71  | 15.64 | 2.85E-01 | 35.26  | 25.40 | 1.65E-01 |
| cg02543879 | 26.88  | 12.54 | 3.21E-02 | 41.32  | 16.88 | 1.44E-02 | -0.63  | 29.21  | 9.83E-01 | 26.56  | 36.46 | 4.66E-01 | 7.32   | 32.81 | 8.23E-01 |
| cg16854917 | 11.99  | 5.59  | 3.21E-02 | 21.31  | 16.67 | 2.01E-01 | 53.33  | 68.46  | 4.36E-01 | 9.69   | 6.32  | 1.25E-01 | 16.79  | 17.83 | 3.46E-01 |
| cg03264729 | -12.55 | 5.85  | 3.21E-02 | -40.95 | 18.24 | 2.48E-02 | -0.10  | 21.48  | 9.96E-01 | -10.94 | 6.00  | 6.83E-02 | 0.44   | 25.10 | 9.86E-01 |
| cg17221584 | -4.25  | 1.98  | 3.21E-02 | -3.45  | 2.89  | 2.33E-01 | -5.90  | 4.05   | 1.45E-01 | 4.56   | 7.28  | 5.31E-01 | -7.16  | 4.26  | 9.23E-02 |
| cg12057158 | -10.57 | 4.93  | 3.21E-02 | -25.15 | 10.77 | 1.95E-02 | -16.01 | 22.16  | 4.70E-01 | -6.01  | 6.06  | 3.21E-01 | -6.64  | 17.55 | 7.05E-01 |
| cg23109649 | -21.10 | 9.84  | 3.21E-02 | -31.45 | 10.76 | 3.47E-03 | 19.29  | 25.94  | 4.57E-01 | -24.78 | 50.88 | 6.26E-01 | -17.92 | 18.65 | 3.37E-01 |
| cg02467956 | 13.73  | 6.40  | 3.21E-02 | 8.79   | 9.24  | 3.41E-01 | 14.20  | 13.76  | 3.02E-01 | 18.20  | 15.90 | 2.52E-01 | 24.73  | 17.10 | 1.48E-01 |
| cg07315006 | -13.58 | 6.34  | 3.21E-02 | -5.11  | 15.80 | 7.46E-01 | 0.30   | 29.63  | 9.92E-01 | -18.52 | 7.50  | 1.35E-02 | 5.85   | 22.58 | 7.96E-01 |
| cg22035959 | -13.34 | 6.22  | 3.21E-02 | -3.55  | 9.59  | 7.11E-01 | -23.99 | 15.82  | 1.29E-01 | -27.19 | 16.58 | 1.01E-01 | -15.19 | 11.70 | 1.94E-01 |
| cg14040679 | 36.00  | 16.80 | 3.21E-02 | 62.21  | 21.39 | 3.64E-03 | -2.11  | 31.10  | 9.46E-01 | 3.60   | 47.95 | 9.40E-01 | 43.27  | 36.97 | 2.42E-01 |
| cg05547777 | 15.49  | 7.23  | 3.21E-02 | 22.54  | 14.45 | 1.19E-01 | 21.95  | 27.82  | 4.30E-01 | 14.92  | 10.60 | 1.59E-01 | 6.58   | 15.52 | 6.71E-01 |
| cg07289618 | -14.27 | 6.66  | 3.21E-02 | -19.09 | 10.50 | 6.91E-02 | -5.67  | 13.97  | 6.85E-01 | -25.75 | 16.21 | 1.12E-01 | -4.78  | 14.80 | 7.47E-01 |
| cg22579841 | 11.82  | 5.51  | 3.21E-02 | 16.98  | 9.33  | 6.89E-02 | 13.21  | 11.82  | 2.64E-01 | -0.22  | 9.93  | 9.82E-01 | 24.66  | 15.59 | 1.14E-01 |
| cg25330843 | 18.34  | 8.56  | 3.21E-02 | 42.38  | 19.06 | 2.62E-02 | 12.62  | 24.70  | 6.09E-01 | 13.42  | 12.85 | 2.97E-01 | 9.93   | 17.65 | 5.74E-01 |
| cg18046311 | -13.90 | 6.49  | 3.21E-02 | -6.77  | 11.92 | 5.70E-01 | 11.14  | 24.36  | 6.47E-01 | -20.61 | 8.49  | 1.51E-02 | -13.15 | 29.40 | 6.55E-01 |
| cg16968662 | 18.31  | 8.54  | 3.21E-02 | 20.94  | 15.02 | 1.63E-01 | 6.14   | 15.37  | 6.89E-01 | 25.30  | 20.00 | 2.06E-01 | 27.10  | 19.84 | 1.72E-01 |
| cg17187287 | 13.08  | 6.10  | 3.21E-02 | 26.76  | 15.06 | 7.56E-02 | 14.69  | 18.90  | 4.37E-01 | 11.78  | 8.94  | 1.88E-01 | 6.27   | 11.83 | 5.96E-01 |
| cg03227128 | 32.21  | 15.03 | 3.21E-02 | 7.72   | 16.03 | 6.30E-01 | 75.85  | 32.17  | 1.84E-02 | 26.37  | 29.94 | 3.78E-01 | 48.36  | 26.16 | 6.45E-02 |
| cg01372811 | -10.05 | 4.69  | 3.21E-02 | -11.93 | 6.67  | 7.36E-02 | -9.99  | 10.77  | 3.54E-01 | 8.19   | 14.37 | 5.69E-01 | -14.95 | 10.25 | 1.45E-01 |
| cg04989278 | 13.00  | 6.06  | 3.21E-02 | 14.67  | 8.43  | 8.18E-02 | 15.40  | 14.76  | 2.97E-01 | 17.41  | 23.01 | 4.49E-01 | 6.54   | 12.28 | 5.94E-01 |
| cg05459517 | -8.67  | 4.05  | 3.21E-02 | -6.98  | 7.39  | 3.45E-01 | -11.14 | 11.57  | 3.36E-01 | -6.68  | 6.48  | 3.03E-01 | -13.94 | 9.35  | 1.36E-01 |
| cg02188185 | 5.32   | 2.48  | 3.21E-02 | 4.12   | 3.28  | 2.09E-01 | 11.86  | 4.89   | 1.52E-02 | -2.53  | 6.83  | 7.11E-01 | 5.40   | 6.13  | 3.78E-01 |
| cg26687119 | 13.51  | 6.30  | 3.21E-02 | 5.86   | 6.23  | 3.47E-01 | 5.84   | 10.18  | 5.66E-01 | 42.16  | 15.39 | 6.17E-03 | 16.58  | 8.64  | 5.50E-02 |
| cg05381287 | -10.20 | 4.76  | 3.21E-02 | -17.84 | 10.40 | 8.62E-02 | 4.41   | 18.11  | 8.08E-01 | -9.31  | 6.14  | 1.30E-01 | -9.73  | 13.66 | 4.76E-01 |
| cg17174893 | 15.39  | 7.18  | 3.21E-02 | 21.46  | 11.93 | 7.19E-02 | 16.45  | 14.55  | 2.58E-01 | 16.41  | 14.28 | 2.51E-01 | -3.91  | 19.15 | 8.38E-01 |
| cg17875102 | -8.53  | 3.98  | 3.21E-02 | -9.05  | 5.60  | 1.06E-01 | -13.18 | 10.31  | 2.01E-01 | -9.37  | 10.26 | 3.61E-01 | -2.97  | 9.02  | 7.42E-01 |
| cg05273053 | 15.31  | 7.15  | 3.21E-02 | 46.08  | 22.73 | 4.27E-02 | 35.65  | 29.49  | 2.27E-01 | 9.63   | 8.01  | 2.29E-01 | 21.37  | 32.98 | 5.17E-01 |



|            |        |       |          |        |       |          |         |        |          |        |       |          |        |       |          |
|------------|--------|-------|----------|--------|-------|----------|---------|--------|----------|--------|-------|----------|--------|-------|----------|
| cg12405599 | 4.32   | 2.02  | 3.21E-02 | 4.59   | 3.05  | 1.32E-01 | 2.98    | 4.43   | 5.01E-01 | 5.37   | 3.88  | 1.67E-01 | 2.91   | 6.85  | 6.71E-01 |
| cg16177732 | 17.10  | 7.98  | 3.21E-02 | 20.70  | 12.75 | 1.04E-01 | 6.57    | 18.22  | 7.18E-01 | 34.58  | 23.46 | 1.40E-01 | 12.40  | 14.57 | 3.95E-01 |
| cg09328979 | -10.16 | 4.74  | 3.21E-02 | -21.41 | 8.26  | 9.51E-03 | 1.02    | 13.20  | 9.38E-01 | -3.45  | 8.17  | 6.73E-01 | -10.38 | 8.67  | 2.31E-01 |
| cg02061130 | 8.03   | 3.75  | 3.21E-02 | 11.25  | 5.31  | 3.40E-02 | 4.32    | 7.90   | 5.85E-01 | -3.34  | 12.12 | 7.83E-01 | 9.75   | 8.81  | 2.68E-01 |
| cg03437540 | 11.83  | 5.52  | 3.21E-02 | 11.93  | 7.29  | 1.02E-01 | 30.78   | 12.80  | 1.62E-02 | 2.31   | 13.19 | 8.61E-01 | 2.63   | 12.10 | 8.28E-01 |
| cg19279257 | 7.99   | 3.73  | 3.21E-02 | 12.31  | 5.10  | 1.58E-02 | 12.25   | 7.01   | 8.04E-02 | 1.53   | 10.26 | 8.82E-01 | -3.17  | 8.15  | 6.98E-01 |
| cg25289457 | -16.22 | 7.57  | 3.21E-02 | -0.71  | 20.77 | 9.73E-01 | -58.90  | 40.75  | 1.48E-01 | -19.47 | 8.66  | 2.46E-02 | 11.38  | 28.91 | 6.94E-01 |
| cg10190898 | -22.64 | 10.57 | 3.21E-02 | -39.60 | 14.88 | 7.80E-03 | -32.59  | 18.89  | 8.45E-02 | -3.64  | 8.44  | 6.67E-01 | -30.56 | 23.12 | 1.86E-01 |
| cg13375589 | -2.65  | 1.24  | 3.21E-02 | -1.99  | 1.76  | 2.58E-01 | -2.96   | 2.39   | 2.17E-01 | -1.20  | 5.02  | 8.11E-01 | -4.44  | 2.90  | 1.26E-01 |
| cg02637843 | -9.21  | 4.30  | 3.22E-02 | -14.75 | 11.18 | 1.87E-01 | -0.40   | 15.04  | 9.79E-01 | -11.40 | 5.26  | 3.02E-02 | 6.06   | 13.42 | 6.52E-01 |
| cg12721804 | 17.70  | 8.26  | 3.22E-02 | 26.24  | 14.32 | 6.69E-02 | 8.07    | 15.20  | 5.96E-01 | 20.58  | 17.68 | 2.44E-01 | 13.63  | 21.12 | 5.19E-01 |
| cg26644395 | -6.54  | 3.05  | 3.22E-02 | -8.38  | 5.60  | 1.34E-01 | -2.03   | 6.38   | 7.50E-01 | -9.94  | 5.20  | 5.57E-02 | -1.15  | 8.53  | 8.93E-01 |
| cg22340475 | -12.53 | 5.85  | 3.22E-02 | -22.62 | 8.71  | 9.39E-03 | -1.01   | 14.27  | 9.43E-01 | -4.71  | 4.81  | 3.27E-01 | -23.55 | 10.61 | 2.65E-02 |
| cg18434712 | 16.07  | 7.50  | 3.22E-02 | 10.34  | 12.09 | 3.93E-01 | 30.05   | 21.00  | 1.52E-01 | 22.11  | 13.71 | 1.07E-01 | 8.72   | 17.25 | 6.13E-01 |
| cg07547549 | 11.34  | 5.29  | 3.22E-02 | 6.44   | 7.82  | 4.11E-01 | 3.21    | 13.57  | 8.13E-01 | 25.55  | 13.04 | 5.01E-02 | 16.36  | 11.13 | 1.42E-01 |
| cg19949797 | -13.79 | 6.44  | 3.22E-02 | -5.53  | 15.25 | 7.17E-01 | -12.78  | 33.66  | 7.04E-01 | -15.00 | 7.79  | 5.43E-02 | -20.52 | 20.13 | 3.08E-01 |
| cg01488300 | 10.17  | 4.75  | 3.22E-02 | 10.39  | 6.82  | 1.28E-01 | 22.58   | 12.95  | 8.12E-02 | 2.90   | 10.31 | 7.79E-01 | 8.79   | 11.55 | 4.47E-01 |
| cg09356442 | 21.89  | 10.22 | 3.22E-02 | 33.35  | 16.81 | 4.73E-02 | 29.73   | 41.20  | 4.71E-01 | 19.07  | 15.72 | 2.25E-01 | -2.12  | 26.67 | 9.37E-01 |
| cg03411270 | -25.69 | 11.99 | 3.22E-02 | -63.93 | 51.62 | 2.16E-01 | -124.77 | 164.65 | 4.49E-01 | -26.20 | 12.77 | 4.01E-02 | 26.30  | 49.54 | 5.96E-01 |
| cg18055557 | -10.60 | 4.95  | 3.22E-02 | -5.92  | 10.42 | 5.70E-01 | -14.29  | 13.89  | 3.04E-01 | -8.33  | 7.05  | 2.37E-01 | -21.52 | 12.54 | 8.61E-02 |
| cg14494204 | 5.51   | 2.57  | 3.22E-02 | 7.59   | 3.65  | 3.75E-02 | 4.22    | 6.02   | 4.83E-01 | 1.52   | 9.62  | 8.75E-01 | 3.45   | 5.15  | 5.03E-01 |
| cg01961547 | -11.51 | 5.37  | 3.22E-02 | -25.54 | 11.01 | 2.03E-02 | -18.78  | 18.02  | 2.97E-01 | -8.48  | 5.53  | 1.25E-01 | 9.30   | 18.42 | 6.14E-01 |
| cg11262093 | 32.67  | 15.25 | 3.22E-02 | 31.33  | 21.36 | 1.42E-01 | 25.25   | 51.54  | 6.24E-01 | 23.99  | 32.33 | 4.58E-01 | 50.85  | 35.97 | 1.58E-01 |
| cg25074426 | 15.21  | 7.10  | 3.22E-02 | 22.99  | 13.27 | 8.32E-02 | 17.99   | 16.73  | 2.82E-01 | 14.04  | 13.52 | 2.99E-01 | 5.89   | 13.98 | 6.74E-01 |
| cg18395355 | 16.76  | 7.82  | 3.22E-02 | 16.79  | 12.99 | 1.96E-01 | 49.37   | 26.64  | 6.39E-02 | 6.75   | 14.38 | 6.39E-01 | 17.32  | 15.50 | 2.64E-01 |
| cg25245082 | 20.64  | 9.64  | 3.22E-02 | 25.72  | 12.54 | 4.02E-02 | 13.99   | 26.68  | 6.00E-01 | 57.89  | 34.08 | 8.94E-02 | -5.04  | 21.60 | 8.15E-01 |
| cg23000734 | 5.32   | 2.48  | 3.22E-02 | 3.71   | 3.65  | 3.10E-01 | 5.19    | 5.97   | 3.85E-01 | 7.89   | 5.62  | 1.60E-01 | 6.86   | 6.02  | 2.54E-01 |
| cg21290313 | -11.47 | 5.36  | 3.22E-02 | -21.99 | 12.51 | 7.88E-02 | -4.99   | 19.57  | 7.99E-01 | -6.27  | 6.81  | 3.57E-01 | -25.97 | 15.29 | 8.93E-02 |
| cg09237846 | 25.73  | 12.01 | 3.22E-02 | 31.56  | 19.25 | 1.01E-01 | 16.62   | 45.14  | 7.13E-01 | 58.56  | 33.38 | 7.94E-02 | 11.40  | 18.75 | 5.43E-01 |
| cg03633004 | 18.87  | 8.81  | 3.22E-02 | 26.57  | 18.80 | 1.58E-01 | 28.81   | 21.07  | 1.72E-01 | 12.70  | 12.49 | 3.09E-01 | 15.57  | 26.82 | 5.62E-01 |
| cg22853542 | -12.00 | 5.60  | 3.22E-02 | -11.73 | 16.33 | 4.73E-01 | -16.10  | 33.82  | 6.34E-01 | -11.77 | 6.27  | 6.04E-02 | -13.89 | 23.77 | 5.59E-01 |
| cg26381210 | 6.65   | 3.10  | 3.22E-02 | 8.04   | 4.06  | 4.77E-02 | 8.87    | 7.32   | 2.25E-01 | 0.53   | 11.98 | 9.65E-01 | 1.87   | 7.59  | 8.05E-01 |
| cg06577876 | -9.89  | 4.62  | 3.22E-02 | -2.60  | 9.15  | 7.76E-01 | -16.10  | 16.65  | 3.33E-01 | -11.61 | 6.35  | 6.72E-02 | -13.23 | 12.38 | 2.85E-01 |
| cg16910340 | 26.78  | 12.50 | 3.22E-02 | -2.34  | 28.47 | 9.35E-01 | -51.20  | 74.36  | 4.91E-01 | 39.65  | 14.85 | 7.58E-03 | 12.02  | 43.90 | 7.84E-01 |
| cg12655190 | 15.46  | 7.22  | 3.22E-02 | 5.09   | 20.91 | 8.08E-01 | 26.50   | 33.82  | 4.33E-01 | 17.39  | 8.66  | 4.48E-02 | 11.19  | 19.24 | 5.61E-01 |

|            |        |       |          |        |       |          |        |        |          |        |       |          |        |       |          |
|------------|--------|-------|----------|--------|-------|----------|--------|--------|----------|--------|-------|----------|--------|-------|----------|
| cg19529273 | 12.25  | 5.72  | 3.22E-02 | 14.60  | 8.98  | 1.04E-01 | 10.77  | 13.01  | 4.08E-01 | 8.74   | 10.59 | 4.09E-01 | 15.50  | 17.30 | 3.70E-01 |
| cg25925006 | 13.37  | 6.24  | 3.22E-02 | 10.51  | 8.39  | 2.10E-01 | 13.22  | 23.51  | 5.74E-01 | 66.42  | 41.77 | 1.12E-01 | 14.53  | 10.50 | 1.66E-01 |
| cg11183935 | -8.92  | 4.16  | 3.22E-02 | -13.86 | 5.96  | 2.00E-02 | -11.16 | 11.57  | 3.35E-01 | -2.67  | 11.19 | 8.11E-01 | -1.35  | 8.44  | 8.73E-01 |
| cg25188395 | 14.44  | 6.74  | 3.22E-02 | 17.70  | 14.63 | 2.26E-01 | 27.75  | 16.85  | 9.96E-02 | 12.61  | 11.71 | 2.81E-01 | 6.94   | 12.40 | 5.76E-01 |
| cg13876878 | -9.75  | 4.55  | 3.22E-02 | -7.66  | 8.39  | 3.61E-01 | -7.04  | 10.22  | 4.91E-01 | -6.26  | 7.58  | 4.09E-01 | -26.23 | 11.90 | 2.75E-02 |
| cg04157865 | 6.39   | 2.98  | 3.22E-02 | 6.33   | 3.87  | 1.02E-01 | 11.13  | 7.77   | 1.52E-01 | 6.22   | 8.34  | 4.56E-01 | 1.48   | 8.25  | 8.58E-01 |
| cg01575930 | -5.87  | 2.74  | 3.23E-02 | -8.93  | 4.28  | 3.68E-02 | -6.20  | 7.25   | 3.92E-01 | -3.63  | 5.26  | 4.90E-01 | -1.88  | 6.55  | 7.74E-01 |
| cg11585670 | -9.45  | 4.41  | 3.23E-02 | -9.10  | 9.76  | 3.51E-01 | 4.10   | 13.52  | 7.62E-01 | -10.86 | 5.79  | 6.05E-02 | -15.91 | 13.47 | 2.38E-01 |
| cg16919771 | 34.97  | 16.33 | 3.23E-02 | 50.11  | 21.64 | 2.06E-02 | -10.16 | 38.54  | 7.92E-01 | 85.59  | 50.45 | 8.98E-02 | 15.80  | 31.45 | 6.15E-01 |
| cg02367316 | 5.16   | 2.41  | 3.23E-02 | 4.65   | 3.54  | 1.88E-01 | 9.12   | 4.95   | 6.56E-02 | 3.88   | 8.15  | 6.34E-01 | 2.37   | 5.24  | 6.51E-01 |
| cg27094856 | 23.00  | 10.74 | 3.23E-02 | 20.67  | 25.47 | 4.17E-01 | 122.37 | 99.44  | 2.18E-01 | 25.46  | 13.03 | 5.07E-02 | 4.53   | 29.69 | 8.79E-01 |
| cg26625319 | 40.37  | 18.86 | 3.23E-02 | 28.88  | 23.67 | 2.22E-01 | 95.45  | 77.14  | 2.16E-01 | 69.03  | 47.04 | 1.42E-01 | 36.21  | 49.50 | 4.64E-01 |
| cg16850192 | -15.01 | 7.01  | 3.23E-02 | -21.74 | 17.91 | 2.25E-01 | 0.74   | 32.77  | 9.82E-01 | -9.77  | 8.43  | 2.47E-01 | -44.84 | 21.06 | 3.32E-02 |
| cg13455759 | -10.34 | 4.83  | 3.23E-02 | -6.24  | 11.69 | 5.94E-01 | -1.06  | 16.96  | 9.50E-01 | -10.02 | 6.32  | 1.13E-01 | -20.27 | 11.90 | 8.86E-02 |
| cg25003047 | -8.85  | 4.13  | 3.23E-02 | -14.03 | 5.88  | 1.71E-02 | 3.97   | 10.26  | 6.99E-01 | -10.04 | 14.23 | 4.80E-01 | -6.63  | 8.11  | 4.13E-01 |
| cg12461092 | -9.49  | 4.43  | 3.23E-02 | -7.20  | 8.11  | 3.75E-01 | -4.61  | 11.02  | 6.76E-01 | -12.32 | 7.30  | 9.15E-02 | -12.00 | 10.71 | 2.63E-01 |
| cg24458896 | 27.37  | 12.78 | 3.23E-02 | 30.02  | 16.72 | 7.26E-02 | 46.54  | 54.42  | 3.92E-01 | -43.72 | 72.49 | 5.46E-01 | 26.16  | 22.27 | 2.40E-01 |
| cg24561661 | 12.60  | 5.88  | 3.23E-02 | 12.85  | 12.28 | 2.96E-01 | 16.50  | 18.85  | 3.81E-01 | 9.33   | 8.10  | 2.49E-01 | 21.48  | 15.45 | 1.64E-01 |
| cg05519658 | 14.49  | 6.77  | 3.23E-02 | 16.54  | 14.26 | 2.46E-01 | 6.86   | 25.22  | 7.86E-01 | 12.99  | 8.74  | 1.37E-01 | 23.99  | 21.06 | 2.55E-01 |
| cg03925821 | -24.51 | 11.45 | 3.23E-02 | -10.99 | 17.01 | 5.18E-01 | -2.24  | 32.26  | 9.45E-01 | -20.05 | 9.15  | 2.85E-02 | -68.43 | 22.79 | 2.68E-03 |
| cg21356631 | 6.12   | 2.86  | 3.23E-02 | 4.50   | 3.93  | 2.53E-01 | 13.35  | 6.05   | 2.73E-02 | 2.96   | 9.88  | 7.64E-01 | 3.12   | 7.07  | 6.59E-01 |
| cg07597892 | -13.76 | 6.43  | 3.23E-02 | -26.71 | 16.35 | 1.02E-01 | 2.73   | 27.58  | 9.21E-01 | -12.67 | 7.78  | 1.03E-01 | -10.45 | 19.57 | 5.93E-01 |
| cg25721366 | -45.08 | 21.06 | 3.23E-02 | -62.04 | 35.08 | 7.70E-02 | 36.88  | 142.69 | 7.96E-01 | -40.43 | 31.29 | 1.96E-01 | -31.60 | 51.83 | 5.42E-01 |
| cg17499324 | 16.69  | 7.80  | 3.23E-02 | 4.63   | 10.36 | 6.55E-01 | 36.80  | 14.49  | 1.11E-02 | 24.60  | 21.36 | 2.50E-01 | 12.61  | 16.46 | 4.44E-01 |
| cg18641423 | 19.16  | 8.95  | 3.23E-02 | 13.01  | 16.19 | 4.22E-01 | 8.62   | 22.11  | 6.97E-01 | 14.02  | 7.59  | 6.47E-02 | 62.35  | 23.15 | 7.08E-03 |
| cg25717464 | 10.53  | 4.92  | 3.23E-02 | 14.16  | 6.71  | 3.48E-02 | 7.21   | 12.04  | 5.49E-01 | 21.82  | 17.46 | 2.11E-01 | -0.09  | 10.58 | 9.93E-01 |
| cg27502457 | 10.56  | 4.93  | 3.23E-02 | 9.54   | 7.62  | 2.11E-01 | 16.40  | 11.52  | 1.55E-01 | 10.44  | 15.23 | 4.93E-01 | 8.41   | 9.11  | 3.56E-01 |
| cg02888677 | -43.63 | 20.38 | 3.23E-02 | -90.76 | 38.50 | 1.84E-02 | -54.54 | 184.23 | 7.67E-01 | -25.68 | 26.64 | 3.35E-01 | -20.44 | 58.25 | 7.26E-01 |
| cg12836959 | 12.61  | 5.89  | 3.23E-02 | 16.73  | 10.80 | 1.22E-01 | 8.69   | 20.40  | 6.70E-01 | 16.80  | 9.20  | 6.79E-02 | 0.12   | 12.87 | 9.92E-01 |
| cg25857569 | -7.44  | 3.48  | 3.23E-02 | -11.09 | 7.49  | 1.39E-01 | -9.74  | 13.67  | 4.76E-01 | -6.34  | 4.39  | 1.49E-01 | -4.81  | 11.31 | 6.70E-01 |
| cg24813588 | 16.18  | 7.56  | 3.23E-02 | 19.78  | 11.61 | 8.86E-02 | 17.09  | 14.65  | 2.43E-01 | 8.77   | 18.06 | 6.27E-01 | 12.73  | 20.60 | 5.36E-01 |
| cg25957043 | 9.93   | 4.64  | 3.23E-02 | 17.69  | 9.74  | 6.93E-02 | 12.45  | 12.09  | 3.03E-01 | 7.11   | 6.24  | 2.55E-01 | 2.09   | 17.20 | 9.03E-01 |
| cg08734527 | -9.86  | 4.61  | 3.23E-02 | -2.44  | 9.89  | 8.05E-01 | -8.27  | 11.03  | 4.53E-01 | -13.93 | 6.90  | 4.37E-02 | -10.36 | 11.42 | 3.64E-01 |
| cg25283284 | 23.18  | 10.83 | 3.23E-02 | 22.99  | 15.39 | 1.35E-01 | 14.50  | 28.83  | 6.15E-01 | 24.97  | 30.17 | 4.08E-01 | 27.78  | 22.33 | 2.13E-01 |
| cg04705084 | 21.14  | 9.88  | 3.23E-02 | 31.11  | 20.75 | 1.34E-01 | 4.75   | 20.93  | 8.20E-01 | 15.51  | 15.97 | 3.32E-01 | 42.27  | 24.10 | 7.94E-02 |

|            |        |       |          |        |       |          |         |        |          |         |       |          |        |       |          |
|------------|--------|-------|----------|--------|-------|----------|---------|--------|----------|---------|-------|----------|--------|-------|----------|
| cg07535628 | 13.47  | 6.29  | 3.23E-02 | 5.14   | 7.19  | 4.75E-01 | 32.28   | 11.95  | 6.90E-03 | 8.66    | 17.57 | 6.22E-01 | 14.08  | 12.07 | 2.43E-01 |
| cg12557254 | 13.35  | 6.24  | 3.23E-02 | 32.26  | 17.40 | 6.38E-02 | 19.50   | 22.21  | 3.80E-01 | 11.44   | 7.25  | 1.15E-01 | -14.64 | 26.95 | 5.87E-01 |
| cg13223682 | 6.92   | 3.23  | 3.23E-02 | 4.03   | 4.69  | 3.91E-01 | 11.15   | 7.65   | 1.45E-01 | 15.78   | 7.27  | 3.00E-02 | -0.69  | 8.39  | 9.34E-01 |
| cg13514037 | 19.07  | 8.91  | 3.23E-02 | 10.65  | 17.18 | 5.35E-01 | 26.63   | 21.80  | 2.22E-01 | 17.79   | 12.88 | 1.67E-01 | 37.78  | 30.40 | 2.14E-01 |
| cg14548380 | 17.12  | 8.00  | 3.23E-02 | 13.66  | 17.70 | 4.40E-01 | 1.80    | 30.87  | 9.54E-01 | 17.22   | 9.99  | 8.48E-02 | 36.18  | 27.00 | 1.80E-01 |
| cg09629053 | -12.22 | 5.71  | 3.23E-02 | -23.73 | 20.00 | 2.35E-01 | -29.21  | 67.95  | 6.67E-01 | -10.18  | 6.15  | 9.80E-02 | -26.10 | 25.46 | 3.05E-01 |
| cg27420236 | 18.77  | 8.77  | 3.23E-02 | 30.06  | 14.38 | 3.66E-02 | -17.64  | 26.58  | 5.07E-01 | 33.25   | 25.17 | 1.86E-01 | 13.76  | 13.91 | 3.23E-01 |
| cg25416334 | 6.94   | 3.24  | 3.23E-02 | 6.28   | 4.67  | 1.78E-01 | 10.63   | 8.28   | 1.99E-01 | 2.46    | 7.92  | 7.56E-01 | 9.49   | 7.32  | 1.95E-01 |
| cg15407517 | 23.93  | 11.18 | 3.23E-02 | 6.07   | 47.56 | 8.98E-01 | 19.24   | 66.59  | 7.73E-01 | 27.62   | 11.99 | 2.12E-02 | -21.28 | 51.93 | 6.82E-01 |
| cg10279055 | 23.70  | 11.07 | 3.23E-02 | 20.95  | 15.42 | 1.74E-01 | -4.25   | 38.47  | 9.12E-01 | 4.37    | 27.47 | 8.74E-01 | 52.47  | 22.65 | 2.05E-02 |
| cg10764907 | 30.26  | 14.14 | 3.23E-02 | 4.18   | 16.83 | 8.04E-01 | 44.12   | 19.95  | 2.70E-02 | 15.24   | 18.24 | 4.04E-01 | 70.99  | 24.34 | 3.54E-03 |
| cg11130317 | 13.72  | 6.41  | 3.23E-02 | 22.87  | 18.05 | 2.05E-01 | 17.93   | 21.24  | 3.99E-01 | 12.44   | 9.09  | 1.71E-01 | 10.55  | 11.99 | 3.79E-01 |
| cg04633683 | -6.76  | 3.16  | 3.23E-02 | -8.47  | 3.93  | 3.13E-02 | -14.15  | 6.86   | 3.93E-02 | 2.55    | 9.22  | 7.82E-01 | 0.10   | 7.06  | 9.89E-01 |
| cg07162060 | -26.10 | 12.19 | 3.23E-02 | -23.97 | 32.58 | 4.62E-01 | -197.65 | 152.98 | 1.96E-01 | -22.97  | 13.68 | 9.32E-02 | -54.79 | 50.17 | 2.75E-01 |
| cg07931785 | -9.07  | 4.24  | 3.23E-02 | -12.44 | 6.27  | 4.73E-02 | -10.59  | 14.29  | 4.59E-01 | -2.09   | 7.35  | 7.76E-01 | -14.28 | 12.05 | 2.36E-01 |
| cg10777851 | -27.47 | 12.83 | 3.23E-02 | -37.70 | 16.06 | 1.89E-02 | -27.03  | 57.71  | 6.40E-01 | -27.35  | 67.71 | 6.86E-01 | -3.87  | 24.43 | 8.74E-01 |
| cg27066155 | 22.46  | 10.49 | 3.23E-02 | 63.75  | 35.17 | 6.99E-02 | -45.95  | 141.52 | 7.45E-01 | 21.66   | 11.36 | 5.66E-02 | -27.89 | 46.03 | 5.45E-01 |
| cg20140394 | -5.22  | 2.44  | 3.23E-02 | -3.21  | 3.94  | 4.15E-01 | -5.62   | 5.52   | 3.08E-01 | -8.48   | 5.07  | 9.47E-02 | -4.91  | 5.61  | 3.82E-01 |
| cg01578017 | 15.20  | 7.10  | 3.23E-02 | 23.04  | 10.61 | 2.98E-02 | 10.06   | 25.30  | 6.91E-01 | 32.14   | 26.05 | 2.17E-01 | 4.24   | 11.24 | 7.06E-01 |
| cg03700218 | -10.41 | 4.86  | 3.23E-02 | -2.96  | 14.29 | 8.36E-01 | -2.13   | 8.88   | 8.11E-01 | 4.39    | 44.82 | 9.22E-01 | -16.56 | 6.43  | 1.00E-02 |
| cg02193925 | -8.43  | 3.94  | 3.23E-02 | -6.44  | 6.96  | 3.55E-01 | 2.76    | 8.74   | 7.52E-01 | -13.24  | 6.53  | 4.25E-02 | -18.40 | 11.53 | 1.11E-01 |
| cg12387859 | 56.09  | 26.21 | 3.24E-02 | 72.58  | 35.53 | 4.11E-02 | 125.72  | 109.61 | 2.51E-01 | 45.05   | 82.88 | 5.87E-01 | 16.41  | 47.95 | 7.32E-01 |
| cg06602871 | -12.46 | 5.82  | 3.24E-02 | -22.75 | 9.90  | 2.16E-02 | -14.55  | 12.70  | 2.52E-01 | -1.60   | 11.57 | 8.90E-01 | -5.94  | 13.31 | 6.55E-01 |
| cg15929181 | -11.11 | 5.19  | 3.24E-02 | -14.91 | 9.41  | 1.13E-01 | -19.11  | 19.49  | 3.27E-01 | -7.28   | 7.13  | 3.07E-01 | -14.46 | 16.97 | 3.94E-01 |
| cg00296894 | -42.54 | 19.88 | 3.24E-02 | -21.57 | 26.39 | 4.14E-01 | -27.35  | 112.09 | 8.07E-01 | -110.84 | 50.39 | 2.78E-02 | -49.65 | 40.11 | 2.16E-01 |
| cg11199869 | 19.07  | 8.91  | 3.24E-02 | 3.09   | 23.25 | 8.94E-01 | 7.07    | 89.02  | 9.37E-01 | 23.26   | 11.72 | 4.72E-02 | 19.25  | 17.32 | 2.66E-01 |
| cg10124287 | -33.39 | 15.60 | 3.24E-02 | -91.25 | 35.75 | 1.07E-02 | -0.34   | 177.01 | 9.98E-01 | -21.60  | 13.76 | 1.16E-01 | -22.76 | 42.86 | 5.95E-01 |
| cg12907379 | 20.28  | 9.48  | 3.24E-02 | -14.45 | 29.31 | 6.22E-01 | -7.80   | 54.14  | 8.85E-01 | 27.92   | 10.82 | 9.91E-03 | 6.41   | 30.27 | 8.32E-01 |
| cg01108392 | 23.14  | 10.82 | 3.24E-02 | 28.66  | 33.74 | 3.96E-01 | 56.36   | 65.26  | 3.88E-01 | 22.90   | 12.56 | 6.83E-02 | 13.03  | 30.19 | 6.66E-01 |
| cg26192309 | -13.66 | 6.38  | 3.24E-02 | -13.22 | 9.59  | 1.68E-01 | -2.89   | 16.18  | 8.58E-01 | -35.91  | 18.92 | 5.77E-02 | -11.37 | 11.91 | 3.40E-01 |
| cg19355263 | -33.03 | 15.43 | 3.24E-02 | -47.34 | 19.31 | 1.42E-02 | -34.94  | 50.18  | 4.86E-01 | 5.47    | 58.84 | 9.26E-01 | 0.75   | 34.72 | 9.83E-01 |
| cg05338969 | 22.64  | 10.58 | 3.24E-02 | 39.85  | 18.24 | 2.89E-02 | 13.95   | 28.86  | 6.29E-01 | 8.30    | 11.01 | 4.51E-01 | 54.66  | 28.96 | 5.91E-02 |
| cg23957126 | 15.91  | 7.43  | 3.24E-02 | 31.82  | 21.06 | 1.31E-01 | -14.31  | 25.47  | 5.74E-01 | 16.53   | 8.64  | 5.57E-02 | 18.61  | 33.42 | 5.78E-01 |
| cg02049979 | -14.04 | 6.56  | 3.24E-02 | -18.66 | 13.37 | 1.63E-01 | -23.49  | 16.55  | 1.56E-01 | -16.42  | 10.81 | 1.29E-01 | 0.84   | 13.58 | 9.51E-01 |
| cg27239280 | 8.07   | 3.77  | 3.24E-02 | 10.30  | 5.10  | 4.36E-02 | 9.18    | 8.97   | 3.06E-01 | 8.38    | 9.97  | 4.01E-01 | -2.83  | 10.31 | 7.84E-01 |

|            |        |       |          |        |       |          |         |        |          |        |       |          |        |       |          |
|------------|--------|-------|----------|--------|-------|----------|---------|--------|----------|--------|-------|----------|--------|-------|----------|
| cg02635932 | 6.38   | 2.98  | 3.24E-02 | 6.96   | 4.26  | 1.02E-01 | 5.47    | 7.32   | 4.54E-01 | 10.35  | 9.80  | 2.91E-01 | 4.39   | 5.94  | 4.60E-01 |
| cg18614734 | 18.10  | 8.46  | 3.24E-02 | 31.06  | 9.68  | 1.34E-03 | -6.77   | 14.09  | 6.31E-01 | 25.91  | 21.56 | 2.30E-01 | 18.96  | 11.29 | 9.32E-02 |
| cg05967487 | 8.81   | 4.12  | 3.24E-02 | 12.29  | 7.63  | 1.07E-01 | 16.18   | 9.33   | 8.29E-02 | 2.00   | 6.45  | 7.56E-01 | 11.97  | 12.73 | 3.47E-01 |
| cg17842918 | 4.95   | 2.31  | 3.24E-02 | 3.70   | 2.46  | 1.33E-01 | 10.71   | 3.92   | 6.24E-03 | 7.15   | 6.60  | 2.79E-01 | -0.89  | 4.66  | 8.49E-01 |
| cg14091497 | 13.55  | 6.33  | 3.24E-02 | 16.35  | 9.52  | 8.59E-02 | 6.07    | 11.51  | 5.98E-01 | 11.47  | 19.76 | 5.62E-01 | 21.74  | 16.27 | 1.82E-01 |
| cg20857228 | 35.24  | 16.47 | 3.24E-02 | -6.93  | 50.69 | 8.91E-01 | -207.19 | 172.26 | 2.29E-01 | 44.52  | 17.50 | 1.09E-02 | 17.09  | 68.28 | 8.02E-01 |
| cg03536474 | 15.00  | 7.01  | 3.24E-02 | 35.25  | 21.59 | 1.02E-01 | 53.78   | 32.87  | 1.02E-01 | 13.36  | 7.50  | 7.49E-02 | 0.13   | 15.93 | 9.94E-01 |
| cg24378421 | -6.34  | 2.96  | 3.24E-02 | -10.64 | 4.20  | 1.13E-02 | -1.64   | 6.99   | 8.14E-01 | 5.21   | 9.62  | 5.88E-01 | -5.46  | 6.22  | 3.80E-01 |
| cg03939485 | 34.22  | 16.00 | 3.24E-02 | 35.33  | 18.68 | 5.86E-02 | 71.38   | 72.85  | 3.27E-01 | 37.11  | 77.16 | 6.31E-01 | 18.69  | 38.20 | 6.25E-01 |
| cg17747171 | -44.50 | 20.80 | 3.24E-02 | -49.23 | 26.79 | 6.61E-02 | -131.55 | 75.57  | 8.17E-02 | -14.71 | 58.90 | 8.03E-01 | -15.39 | 46.89 | 7.43E-01 |
| cg11719323 | 8.90   | 4.16  | 3.24E-02 | 1.41   | 11.47 | 9.02E-01 | 18.20   | 15.31  | 2.34E-01 | 11.39  | 4.93  | 2.10E-02 | -8.86  | 14.47 | 5.40E-01 |
| cg13043862 | 24.33  | 11.37 | 3.24E-02 | 42.68  | 13.29 | 1.32E-03 | 29.29   | 42.55  | 4.91E-01 | 12.53  | 32.72 | 7.02E-01 | 3.84   | 15.83 | 8.08E-01 |
| cg08274380 | 14.70  | 6.87  | 3.24E-02 | 13.95  | 9.03  | 1.22E-01 | -34.97  | 92.15  | 7.04E-01 | 15.36  | 12.82 | 2.31E-01 | 18.77  | 19.17 | 3.28E-01 |
| cg01756381 | 14.32  | 6.70  | 3.24E-02 | 29.24  | 17.40 | 9.28E-02 | 15.47   | 25.75  | 5.48E-01 | 10.30  | 9.76  | 2.91E-01 | 13.07  | 11.96 | 2.74E-01 |
| cg13449535 | -7.42  | 3.47  | 3.24E-02 | -3.81  | 4.88  | 4.36E-01 | -9.84   | 8.93   | 2.71E-01 | -10.12 | 10.39 | 3.30E-01 | -12.41 | 7.19  | 8.45E-02 |
| cg03700131 | 22.69  | 10.61 | 3.24E-02 | 21.24  | 13.05 | 1.04E-01 | 18.24   | 39.61  | 6.45E-01 | 71.10  | 57.82 | 2.19E-01 | 21.18  | 21.90 | 3.33E-01 |
| cg01813335 | 9.25   | 4.33  | 3.24E-02 | 14.19  | 7.37  | 5.41E-02 | 4.04    | 10.38  | 6.97E-01 | 13.18  | 9.75  | 1.76E-01 | 3.74   | 8.11  | 6.44E-01 |
| cg11497952 | -24.63 | 11.51 | 3.24E-02 | -1.86  | 27.51 | 9.46E-01 | -170.69 | 105.97 | 1.07E-01 | -29.82 | 14.50 | 3.97E-02 | -19.11 | 26.95 | 4.78E-01 |
| cg06793581 | -22.92 | 10.71 | 3.24E-02 | -9.10  | 15.13 | 5.48E-01 | -24.61  | 24.74  | 3.20E-01 | -23.96 | 28.51 | 4.01E-01 | -61.01 | 26.01 | 1.90E-02 |
| cg09539720 | -11.25 | 5.26  | 3.24E-02 | -8.91  | 7.35  | 2.26E-01 | -18.32  | 13.70  | 1.81E-01 | -12.82 | 12.60 | 3.09E-01 | -10.58 | 12.91 | 4.13E-01 |
| cg25950325 | 15.74  | 7.36  | 3.24E-02 | 23.88  | 24.09 | 3.22E-01 | 70.39   | 64.53  | 2.75E-01 | 15.94  | 8.14  | 5.03E-02 | -5.61  | 26.64 | 8.33E-01 |
| cg02847897 | -5.87  | 2.74  | 3.24E-02 | -4.75  | 3.21  | 1.39E-01 | -0.18   | 5.13   | 9.72E-01 | -6.97  | 10.79 | 5.18E-01 | -13.74 | 5.22  | 8.51E-03 |
| cg22545121 | 12.14  | 5.68  | 3.24E-02 | 10.29  | 8.39  | 2.20E-01 | 20.12   | 21.47  | 3.49E-01 | 21.69  | 11.24 | 5.37E-02 | 2.31   | 12.16 | 8.49E-01 |
| cg04880804 | -12.67 | 5.93  | 3.24E-02 | -26.71 | 17.29 | 1.23E-01 | 8.55    | 21.52  | 6.91E-01 | -13.05 | 6.79  | 5.47E-02 | -5.62  | 27.63 | 8.39E-01 |
| cg19420930 | -13.57 | 6.34  | 3.25E-02 | -24.90 | 7.93  | 1.68E-03 | 0.47    | 11.66  | 9.68E-01 | -6.16  | 18.15 | 7.34E-01 | -10.59 | 12.37 | 3.92E-01 |
| cg23440520 | 18.18  | 8.50  | 3.25E-02 | 13.22  | 15.89 | 4.05E-01 | 25.50   | 18.45  | 1.67E-01 | 15.37  | 16.88 | 3.63E-01 | 20.51  | 17.07 | 2.29E-01 |
| cg10901806 | -10.59 | 4.95  | 3.25E-02 | -15.82 | 7.51  | 3.52E-02 | -6.03   | 11.15  | 5.88E-01 | -6.60  | 14.20 | 6.42E-01 | -6.98  | 9.95  | 4.83E-01 |
| cg27640908 | -25.59 | 11.97 | 3.25E-02 | -11.11 | 17.53 | 5.26E-01 | 34.21   | 122.80 | 7.81E-01 | -34.32 | 18.84 | 6.84E-02 | -57.06 | 34.45 | 9.77E-02 |
| cg13932794 | -10.64 | 4.98  | 3.25E-02 | -2.67  | 7.05  | 7.05E-01 | -21.07  | 11.28  | 6.18E-02 | -8.01  | 20.18 | 6.91E-01 | -19.23 | 10.04 | 5.54E-02 |
| cg02199826 | -9.18  | 4.29  | 3.25E-02 | -15.38 | 9.08  | 9.03E-02 | -38.05  | 20.05  | 5.77E-02 | -5.46  | 5.16  | 2.90E-01 | -6.34  | 11.74 | 5.89E-01 |
| cg03333330 | 18.38  | 8.60  | 3.25E-02 | 22.62  | 12.87 | 7.89E-02 | -1.52   | 23.65  | 9.49E-01 | 41.97  | 22.11 | 5.77E-02 | 7.95   | 16.52 | 6.30E-01 |
| cg03389046 | 18.53  | 8.66  | 3.25E-02 | 14.02  | 14.30 | 3.27E-01 | 10.17   | 16.68  | 5.42E-01 | 16.18  | 20.46 | 4.29E-01 | 42.05  | 20.20 | 3.73E-02 |
| cg01811815 | 8.40   | 3.93  | 3.25E-02 | 9.56   | 5.66  | 9.10E-02 | 11.36   | 7.68   | 1.39E-01 | 7.15   | 12.21 | 5.58E-01 | 0.51   | 10.09 | 9.60E-01 |
| cg08189968 | 22.97  | 10.74 | 3.25E-02 | 9.28   | 13.92 | 5.05E-01 | 35.24   | 28.08  | 2.10E-01 | 9.65   | 37.39 | 7.96E-01 | 52.66  | 22.04 | 1.69E-02 |
| cg14487131 | 15.89  | 7.43  | 3.25E-02 | 47.02  | 22.09 | 3.33E-02 | 30.81   | 40.08  | 4.42E-01 | 15.98  | 5.75  | 5.46E-03 | -2.18  | 14.68 | 8.82E-01 |

|            |        |       |          |        |       |          |         |        |          |        |       |          |        |       |          |
|------------|--------|-------|----------|--------|-------|----------|---------|--------|----------|--------|-------|----------|--------|-------|----------|
| cg10645855 | 31.56  | 14.76 | 3.25E-02 | 30.70  | 21.63 | 1.56E-01 | 1.83    | 40.12  | 9.64E-01 | 46.00  | 46.21 | 3.19E-01 | 41.46  | 27.06 | 1.26E-01 |
| cg18384794 | -15.83 | 7.40  | 3.25E-02 | -16.64 | 14.48 | 2.50E-01 | 10.32   | 29.11  | 7.23E-01 | -16.33 | 10.45 | 1.18E-01 | -22.91 | 17.81 | 1.98E-01 |
| cg08359697 | 20.86  | 9.75  | 3.25E-02 | 6.19   | 19.49 | 7.51E-01 | -30.24  | 47.51  | 5.24E-01 | 31.15  | 12.72 | 1.43E-02 | 18.97  | 28.20 | 5.01E-01 |
| cg06480998 | -12.38 | 5.79  | 3.25E-02 | -12.65 | 14.00 | 3.66E-01 | 25.15   | 27.52  | 3.61E-01 | -14.74 | 7.02  | 3.58E-02 | -12.51 | 17.93 | 4.85E-01 |
| cg16892046 | 43.72  | 20.45 | 3.25E-02 | 13.36  | 50.96 | 7.93E-01 | 78.73   | 84.29  | 3.50E-01 | 61.37  | 25.21 | 1.49E-02 | -28.03 | 58.46 | 6.32E-01 |
| cg23727321 | 17.85  | 8.35  | 3.25E-02 | 37.23  | 28.30 | 1.88E-01 | -58.00  | 116.36 | 6.18E-01 | 16.25  | 8.97  | 6.99E-02 | 19.97  | 41.16 | 6.28E-01 |
| cg21981270 | 24.75  | 11.57 | 3.25E-02 | 34.92  | 16.70 | 3.66E-02 | 27.49   | 57.57  | 6.33E-01 | -3.41  | 56.47 | 9.52E-01 | 16.03  | 17.50 | 3.60E-01 |
| cg09460563 | 15.81  | 7.39  | 3.25E-02 | 13.95  | 13.41 | 2.98E-01 | 52.21   | 32.27  | 1.06E-01 | 13.01  | 9.76  | 1.83E-01 | 19.50  | 27.95 | 4.85E-01 |
| cg19411729 | -9.36  | 4.38  | 3.25E-02 | -17.07 | 7.76  | 2.79E-02 | -8.81   | 10.61  | 4.07E-01 | -1.48  | 8.49  | 8.61E-01 | -8.29  | 8.82  | 3.47E-01 |
| cg04265951 | 12.36  | 5.78  | 3.25E-02 | 3.72   | 15.22 | 8.07E-01 | -0.75   | 15.77  | 9.62E-01 | 17.47  | 7.22  | 1.55E-02 | 9.01   | 20.31 | 6.58E-01 |
| cg01182690 | 13.11  | 6.13  | 3.25E-02 | 5.16   | 17.54 | 7.69E-01 | 22.19   | 59.47  | 7.09E-01 | 16.16  | 6.86  | 1.85E-02 | -10.15 | 23.67 | 6.68E-01 |
| cg11819402 | 11.40  | 5.33  | 3.25E-02 | 6.64   | 8.94  | 4.58E-01 | 12.39   | 12.60  | 3.25E-01 | 9.36   | 10.45 | 3.71E-01 | 21.43  | 11.79 | 6.92E-02 |
| cg24671202 | 15.23  | 7.12  | 3.25E-02 | 19.96  | 9.39  | 3.36E-02 | 17.15   | 22.74  | 4.51E-01 | 21.55  | 32.00 | 5.01E-01 | 3.60   | 13.54 | 7.90E-01 |
| cg13752005 | 29.43  | 13.77 | 3.25E-02 | 44.78  | 44.29 | 3.12E-01 | -145.77 | 183.65 | 4.27E-01 | 26.87  | 15.11 | 7.53E-02 | 53.69  | 53.13 | 3.12E-01 |
| cg11890080 | 32.21  | 15.06 | 3.25E-02 | 34.14  | 16.82 | 4.24E-02 | 138.68  | 133.20 | 2.98E-01 | 47.17  | 70.82 | 5.05E-01 | 6.49   | 40.34 | 8.72E-01 |
| cg26441291 | -16.40 | 7.67  | 3.25E-02 | -8.21  | 20.63 | 6.91E-01 | -7.48   | 53.86  | 8.90E-01 | -22.69 | 8.88  | 1.06E-02 | 18.96  | 24.82 | 4.45E-01 |
| cg01106338 | 15.67  | 7.33  | 3.25E-02 | 21.52  | 10.29 | 3.65E-02 | 16.82   | 17.59  | 3.39E-01 | 25.51  | 9.68  | 8.41E-03 | -7.23  | 12.95 | 5.77E-01 |
| cg10900526 | 17.56  | 8.21  | 3.25E-02 | 11.64  | 17.99 | 5.18E-01 | -2.60   | 32.04  | 9.35E-01 | 21.51  | 10.40 | 3.87E-02 | 18.48  | 25.64 | 4.71E-01 |
| cg02790691 | 6.06   | 2.84  | 3.25E-02 | 6.43   | 4.71  | 1.73E-01 | 12.69   | 6.55   | 5.28E-02 | 4.75   | 4.79  | 3.21E-01 | -3.10  | 8.98  | 7.30E-01 |
| cg10870587 | -8.39  | 3.92  | 3.25E-02 | -11.23 | 6.19  | 6.94E-02 | -1.36   | 22.72  | 9.52E-01 | -6.32  | 6.36  | 3.20E-01 | -7.58  | 9.06  | 4.03E-01 |
| cg16256106 | 26.33  | 12.32 | 3.26E-02 | 24.45  | 14.34 | 8.83E-02 | 27.36   | 56.42  | 6.28E-01 | 66.76  | 81.94 | 4.15E-01 | 28.50  | 28.07 | 3.10E-01 |
| cg01920536 | 15.65  | 7.32  | 3.26E-02 | 12.75  | 10.56 | 2.27E-01 | 15.30   | 15.14  | 3.12E-01 | 12.25  | 26.79 | 6.48E-01 | 23.87  | 15.96 | 1.35E-01 |
| cg02165743 | -8.46  | 3.96  | 3.26E-02 | -12.45 | 5.69  | 2.85E-02 | -10.21  | 7.95   | 1.99E-01 | -9.93  | 23.79 | 6.76E-01 | 1.57   | 8.07  | 8.46E-01 |
| cg06771021 | 16.47  | 7.71  | 3.26E-02 | 19.95  | 20.32 | 3.26E-01 | 38.19   | 30.20  | 2.06E-01 | 14.66  | 9.03  | 1.04E-01 | 6.90   | 30.89 | 8.23E-01 |
| cg21184369 | 5.06   | 2.37  | 3.26E-02 | 4.34   | 3.37  | 1.97E-01 | 6.53    | 5.60   | 2.43E-01 | 5.94   | 5.08  | 2.42E-01 | 4.14   | 7.11  | 5.61E-01 |
| cg13823666 | -12.72 | 5.95  | 3.26E-02 | -23.73 | 15.60 | 1.28E-01 | 0.37    | 20.22  | 9.85E-01 | -12.97 | 7.23  | 7.29E-02 | -5.65  | 19.85 | 7.76E-01 |
| cg21241902 | 8.98   | 4.20  | 3.26E-02 | 12.58  | 4.83  | 9.21E-03 | 18.24   | 8.89   | 4.02E-02 | -5.12  | 9.02  | 5.70E-01 | 6.33   | 7.15  | 3.76E-01 |
| cg26307355 | -36.68 | 17.16 | 3.26E-02 | -44.64 | 25.78 | 8.34E-02 | 22.91   | 74.16  | 7.57E-01 | -40.22 | 28.39 | 1.57E-01 | -24.84 | 46.26 | 5.91E-01 |
| cg23451129 | -7.89  | 3.69  | 3.26E-02 | -7.90  | 5.74  | 1.69E-01 | -13.78  | 11.61  | 2.35E-01 | -3.23  | 6.10  | 5.96E-01 | -17.10 | 10.67 | 1.09E-01 |
| cg27445265 | -37.01 | 17.32 | 3.26E-02 | -32.39 | 20.68 | 1.17E-01 | -138.47 | 78.25  | 7.68E-02 | -22.90 | 86.45 | 7.91E-01 | -31.45 | 37.80 | 4.05E-01 |
| cg13544294 | 15.94  | 7.46  | 3.26E-02 | 12.59  | 13.43 | 3.49E-01 | 21.70   | 19.77  | 2.73E-01 | 19.68  | 11.26 | 8.07E-02 | 3.08   | 22.44 | 8.91E-01 |
| cg24351452 | -12.71 | 5.95  | 3.26E-02 | -2.39  | 16.94 | 8.88E-01 | -10.54  | 23.20  | 6.50E-01 | -14.01 | 6.83  | 4.02E-02 | -20.78 | 25.91 | 4.23E-01 |
| cg13480898 | 9.14   | 4.28  | 3.26E-02 | 8.23   | 8.61  | 3.39E-01 | 24.54   | 11.57  | 3.40E-02 | 8.48   | 5.76  | 1.41E-01 | -6.00  | 13.45 | 6.56E-01 |
| cg19967421 | -39.73 | 18.59 | 3.26E-02 | -37.88 | 28.70 | 1.87E-01 | 8.76    | 68.36  | 8.98E-01 | -91.23 | 40.20 | 2.32E-02 | -16.99 | 34.38 | 6.21E-01 |
| cg00043324 | -11.88 | 5.56  | 3.26E-02 | -16.29 | 7.78  | 3.64E-02 | -8.11   | 7.73   | 2.94E-01 | -71.40 | 31.80 | 2.47E-02 | -6.67  | 6.40  | 2.97E-01 |

|            |        |       |          |        |       |          |         |        |          |        |       |          |        |       |          |
|------------|--------|-------|----------|--------|-------|----------|---------|--------|----------|--------|-------|----------|--------|-------|----------|
| cg06566994 | 10.71  | 5.01  | 3.26E-02 | 7.60   | 13.34 | 5.69E-01 | 28.53   | 17.55  | 1.04E-01 | 9.52   | 5.92  | 1.08E-01 | 8.04   | 20.40 | 6.93E-01 |
| cg14414154 | 4.79   | 2.24  | 3.26E-02 | 4.81   | 3.14  | 1.25E-01 | 7.83    | 5.85   | 1.81E-01 | 7.66   | 4.96  | 1.22E-01 | -2.72  | 6.01  | 6.50E-01 |
| cg27549619 | 28.70  | 13.43 | 3.26E-02 | 56.34  | 13.94 | 5.28E-05 | 28.37   | 29.04  | 3.28E-01 | 22.10  | 19.45 | 2.56E-01 | 4.84   | 15.13 | 7.49E-01 |
| cg23856967 | -15.32 | 7.17  | 3.26E-02 | -24.17 | 10.03 | 1.60E-02 | -21.53  | 15.94  | 1.77E-01 | -1.41  | 7.36  | 8.48E-01 | -26.93 | 15.30 | 7.83E-02 |
| cg00006459 | 13.51  | 6.32  | 3.26E-02 | 16.04  | 15.14 | 2.89E-01 | 11.25   | 30.42  | 7.11E-01 | 15.30  | 7.62  | 4.48E-02 | -3.08  | 20.52 | 8.81E-01 |
| cg26986731 | 33.18  | 15.53 | 3.26E-02 | 45.67  | 24.81 | 6.57E-02 | 83.05   | 45.60  | 6.85E-02 | -1.49  | 29.66 | 9.60E-01 | 27.82  | 33.24 | 4.03E-01 |
| cg05481445 | -32.46 | 15.19 | 3.26E-02 | -39.03 | 17.56 | 2.62E-02 | -68.71  | 64.38  | 2.86E-01 | 14.09  | 55.23 | 7.99E-01 | -4.09  | 43.76 | 9.25E-01 |
| cg19881263 | 30.27  | 14.17 | 3.26E-02 | 35.99  | 17.08 | 3.50E-02 | 28.83   | 15.63  | 6.52E-02 | 1.65   | 10.75 | 8.78E-01 | 76.92  | 25.46 | 2.52E-03 |
| cg25262044 | -27.31 | 12.78 | 3.26E-02 | -49.16 | 43.44 | 2.58E-01 | -302.15 | 198.14 | 1.27E-01 | -24.81 | 14.32 | 8.32E-02 | -18.03 | 38.03 | 6.35E-01 |
| cg18120576 | -20.08 | 9.40  | 3.26E-02 | -24.00 | 16.37 | 1.43E-01 | 7.32    | 25.98  | 7.78E-01 | -23.55 | 16.74 | 1.60E-01 | -25.44 | 19.83 | 2.00E-01 |
| cg09009788 | 8.76   | 4.10  | 3.26E-02 | 7.31   | 5.63  | 1.94E-01 | 23.96   | 10.70  | 2.51E-02 | 8.01   | 10.03 | 4.25E-01 | 0.18   | 10.37 | 9.86E-01 |
| cg09201327 | 28.05  | 13.13 | 3.26E-02 | 46.44  | 16.55 | 5.03E-03 | 22.24   | 41.82  | 5.95E-01 | -51.92 | 72.23 | 4.72E-01 | 10.04  | 20.71 | 6.28E-01 |
| cg13547551 | -38.68 | 18.11 | 3.26E-02 | -30.01 | 23.53 | 2.02E-01 | -38.64  | 54.97  | 4.82E-01 | -40.30 | 52.13 | 4.40E-01 | -66.37 | 42.83 | 1.21E-01 |
| cg00673191 | 6.96   | 3.26  | 3.26E-02 | 8.76   | 4.56  | 5.45E-02 | 14.99   | 8.82   | 8.93E-02 | 5.00   | 7.52  | 5.06E-01 | -3.02  | 8.01  | 7.06E-01 |
| cg03064080 | -27.02 | 12.65 | 3.26E-02 | 26.19  | 38.55 | 4.97E-01 | 56.22   | 141.98 | 6.92E-01 | -34.13 | 13.97 | 1.46E-02 | -35.52 | 49.37 | 4.72E-01 |
| cg00824156 | 17.04  | 7.98  | 3.27E-02 | 16.76  | 17.74 | 3.45E-01 | 19.54   | 25.29  | 4.40E-01 | 11.36  | 10.39 | 2.74E-01 | 46.05  | 24.18 | 5.68E-02 |
| cg23361009 | -47.16 | 22.08 | 3.27E-02 | -32.65 | 28.30 | 2.49E-01 | 118.45  | 134.83 | 3.80E-01 | -86.23 | 59.55 | 1.48E-01 | -82.01 | 46.35 | 7.68E-02 |
| cg06742044 | -22.73 | 10.64 | 3.27E-02 | -29.24 | 18.52 | 1.14E-01 | -82.18  | 108.46 | 4.49E-01 | -20.54 | 13.95 | 1.41E-01 | -4.20  | 38.08 | 9.12E-01 |
| cg03436461 | 28.65  | 13.41 | 3.27E-02 | 47.92  | 22.07 | 2.99E-02 | -8.30   | 37.29  | 8.24E-01 | 18.02  | 31.20 | 5.63E-01 | 27.49  | 23.84 | 2.49E-01 |
| cg24903497 | -7.37  | 3.45  | 3.27E-02 | -15.62 | 7.45  | 3.61E-02 | 3.05    | 11.73  | 7.95E-01 | -7.06  | 4.56  | 1.21E-01 | -1.87  | 9.75  | 8.48E-01 |
| cg26197117 | 35.09  | 16.43 | 3.27E-02 | 41.51  | 24.28 | 8.73E-02 | 31.91   | 73.25  | 6.63E-01 | 20.12  | 50.64 | 6.91E-01 | 31.97  | 26.43 | 2.26E-01 |
| cg23603376 | 19.87  | 9.30  | 3.27E-02 | 20.10  | 13.04 | 1.23E-01 | 21.09   | 23.94  | 3.78E-01 | 6.13   | 29.29 | 8.34E-01 | 24.40  | 19.02 | 1.99E-01 |
| cg21745248 | -14.18 | 6.64  | 3.27E-02 | 4.86   | 31.67 | 8.78E-01 | -38.13  | 154.96 | 8.06E-01 | -13.23 | 6.89  | 5.49E-02 | -78.45 | 41.10 | 5.63E-02 |
| cg24427376 | 8.94   | 4.18  | 3.27E-02 | 11.18  | 5.73  | 5.13E-02 | 4.67    | 9.21   | 6.12E-01 | 14.72  | 12.37 | 2.34E-01 | 2.30   | 10.93 | 8.34E-01 |
| cg00894352 | -13.23 | 6.19  | 3.27E-02 | -16.50 | 11.25 | 1.42E-01 | 0.67    | 13.34  | 9.60E-01 | -21.73 | 10.51 | 3.86E-02 | -6.10  | 16.97 | 7.20E-01 |
| cg12184293 | 8.94   | 4.19  | 3.27E-02 | 5.90   | 11.38 | 6.04E-01 | 10.86   | 19.16  | 5.71E-01 | 10.16  | 4.76  | 3.27E-02 | -5.93  | 20.47 | 7.72E-01 |
| cg17959631 | -12.43 | 5.82  | 3.27E-02 | -17.73 | 8.91  | 4.65E-02 | -11.41  | 13.51  | 3.98E-01 | -17.93 | 15.44 | 2.45E-01 | -0.78  | 11.76 | 9.47E-01 |
| cg17861618 | -13.28 | 6.22  | 3.27E-02 | -20.50 | 9.99  | 4.02E-02 | 0.10    | 14.59  | 9.95E-01 | -16.53 | 13.09 | 2.06E-01 | -7.91  | 13.71 | 5.64E-01 |
| cg14170756 | -41.48 | 19.42 | 3.27E-02 | -25.38 | 34.44 | 4.61E-01 | -48.81  | 187.00 | 7.94E-01 | -44.72 | 26.83 | 9.55E-02 | -64.12 | 50.59 | 2.05E-01 |
| cg09154639 | 16.51  | 7.73  | 3.27E-02 | 12.56  | 10.81 | 2.45E-01 | 13.83   | 19.55  | 4.79E-01 | 48.76  | 33.06 | 1.40E-01 | 18.95  | 14.68 | 1.97E-01 |
| cg08484506 | -10.27 | 4.81  | 3.27E-02 | -10.96 | 7.84  | 1.62E-01 | -11.34  | 10.76  | 2.92E-01 | -5.25  | 11.29 | 6.42E-01 | -12.08 | 9.77  | 2.16E-01 |
| cg01432692 | -12.34 | 5.78  | 3.27E-02 | -18.24 | 12.50 | 1.45E-01 | -0.23   | 15.89  | 9.89E-01 | -8.65  | 7.85  | 2.70E-01 | -33.02 | 17.19 | 5.47E-02 |
| cg18500988 | 11.09  | 5.19  | 3.27E-02 | 22.25  | 7.56  | 3.25E-03 | 2.28    | 12.03  | 8.50E-01 | 9.74   | 9.73  | 3.17E-01 | 1.98   | 9.67  | 8.38E-01 |
| cg21105019 | -11.59 | 5.43  | 3.27E-02 | -20.67 | 11.16 | 6.40E-02 | -6.11   | 17.41  | 7.25E-01 | -9.25  | 7.09  | 1.92E-01 | -8.52  | 19.13 | 6.56E-01 |
| cg17206604 | -13.51 | 6.33  | 3.27E-02 | -17.82 | 15.86 | 2.61E-01 | -36.95  | 25.59  | 1.49E-01 | -9.26  | 7.50  | 2.17E-01 | -26.85 | 24.28 | 2.69E-01 |

|            |        |       |          |        |       |          |        |        |          |        |       |          |        |       |          |
|------------|--------|-------|----------|--------|-------|----------|--------|--------|----------|--------|-------|----------|--------|-------|----------|
| cg05127440 | 30.13  | 14.11 | 3.27E-02 | 60.01  | 25.56 | 1.89E-02 | 82.50  | 65.72  | 2.09E-01 | 20.26  | 16.82 | 2.28E-01 | -5.08  | 36.00 | 8.88E-01 |
| cg23993559 | 11.52  | 5.39  | 3.27E-02 | 13.44  | 9.42  | 1.54E-01 | -3.53  | 11.38  | 7.56E-01 | 19.20  | 9.14  | 3.57E-02 | 12.27  | 17.09 | 4.73E-01 |
| cg07464571 | 13.07  | 6.12  | 3.27E-02 | 3.54   | 6.88  | 6.08E-01 | 30.85  | 11.32  | 6.41E-03 | 17.23  | 11.27 | 1.26E-01 | 8.36   | 11.31 | 4.60E-01 |
| cg23957311 | 7.96   | 3.73  | 3.27E-02 | 3.23   | 5.88  | 5.82E-01 | 3.85   | 8.29   | 6.43E-01 | 17.52  | 7.39  | 1.77E-02 | 10.05  | 9.90  | 3.10E-01 |
| cg00289094 | -13.14 | 6.15  | 3.27E-02 | -19.88 | 10.22 | 5.18E-02 | -3.05  | 14.08  | 8.28E-01 | 1.19   | 13.92 | 9.32E-01 | -22.22 | 12.27 | 7.02E-02 |
| cg08449748 | 14.42  | 6.75  | 3.27E-02 | 9.74   | 9.74  | 3.18E-01 | 13.68  | 13.23  | 3.01E-01 | 17.61  | 19.64 | 3.70E-01 | 29.16  | 18.02 | 1.06E-01 |
| cg22988581 | -9.08  | 4.25  | 3.27E-02 | -8.81  | 11.27 | 4.34E-01 | -6.61  | 13.62  | 6.28E-01 | -7.32  | 5.21  | 1.61E-01 | -24.30 | 13.77 | 7.77E-02 |
| cg26417346 | -38.72 | 18.13 | 3.27E-02 | -47.10 | 26.82 | 7.91E-02 | 13.27  | 55.78  | 8.12E-01 | -72.68 | 56.47 | 1.98E-01 | -33.23 | 31.37 | 2.90E-01 |
| cg06641415 | 13.51  | 6.33  | 3.27E-02 | 16.29  | 18.61 | 3.81E-01 | 66.83  | 67.39  | 3.21E-01 | 15.32  | 7.14  | 3.19E-02 | -10.95 | 21.02 | 6.02E-01 |
| cg10839291 | 15.83  | 7.41  | 3.27E-02 | 15.91  | 9.44  | 9.18E-02 | 25.04  | 21.22  | 2.38E-01 | -1.99  | 29.76 | 9.47E-01 | 15.48  | 16.62 | 3.52E-01 |
| cg13531562 | 20.30  | 9.51  | 3.27E-02 | 36.60  | 18.77 | 5.12E-02 | 8.98   | 18.69  | 6.31E-01 | 8.00   | 16.66 | 6.31E-01 | 37.56  | 23.82 | 1.15E-01 |
| cg24173182 | 9.63   | 4.51  | 3.27E-02 | 4.98   | 4.05  | 2.18E-01 | 7.10   | 6.75   | 2.92E-01 | 33.69  | 13.36 | 1.17E-02 | 12.75  | 10.10 | 2.07E-01 |
| cg26320080 | 17.63  | 8.26  | 3.27E-02 | 1.84   | 12.10 | 8.79E-01 | 38.34  | 19.48  | 4.90E-02 | 30.90  | 18.44 | 9.39E-02 | 18.48  | 15.25 | 2.26E-01 |
| cg12811552 | 39.06  | 18.29 | 3.27E-02 | 11.64  | 45.68 | 7.99E-01 | 7.11   | 184.89 | 9.69E-01 | 48.24  | 21.21 | 2.29E-02 | 14.41  | 62.44 | 8.17E-01 |
| cg13504318 | 5.71   | 2.67  | 3.27E-02 | 5.72   | 3.41  | 9.29E-02 | 12.30  | 5.11   | 1.60E-02 | 0.77   | 9.98  | 9.39E-01 | -1.30  | 5.98  | 8.28E-01 |
| cg03517146 | 20.89  | 9.78  | 3.27E-02 | 7.33   | 19.07 | 7.01E-01 | 31.23  | 16.79  | 6.29E-02 | 17.38  | 18.73 | 3.53E-01 | 29.05  | 27.72 | 2.95E-01 |
| cg20819482 | 4.76   | 2.23  | 3.27E-02 | 6.02   | 3.20  | 6.01E-02 | 8.33   | 5.21   | 1.10E-01 | 1.21   | 4.64  | 7.95E-01 | 0.41   | 6.93  | 9.53E-01 |
| cg04131010 | 13.45  | 6.30  | 3.28E-02 | 38.97  | 20.24 | 5.42E-02 | 32.32  | 23.18  | 1.63E-01 | 8.09   | 7.13  | 2.56E-01 | 20.26  | 28.89 | 4.83E-01 |
| cg03957095 | 9.66   | 4.53  | 3.28E-02 | 9.11   | 9.58  | 3.42E-01 | 3.27   | 11.52  | 7.77E-01 | 10.61  | 6.96  | 1.28E-01 | 13.22  | 10.13 | 1.92E-01 |
| cg19381766 | 12.54  | 5.87  | 3.28E-02 | 9.64   | 8.09  | 2.34E-01 | 20.83  | 14.10  | 1.40E-01 | 30.85  | 19.65 | 1.16E-01 | 5.20   | 12.78 | 6.84E-01 |
| cg21234244 | 9.08   | 4.25  | 3.28E-02 | 6.47   | 9.31  | 4.87E-01 | 17.38  | 19.68  | 3.77E-01 | 10.17  | 5.28  | 5.38E-02 | 3.22   | 13.88 | 8.17E-01 |
| cg23415489 | -23.84 | 11.17 | 3.28E-02 | -27.06 | 16.27 | 9.63E-02 | -10.45 | 30.17  | 7.29E-01 | -28.80 | 26.63 | 2.80E-01 | -21.27 | 24.01 | 3.76E-01 |
| cg22694813 | -15.11 | 7.08  | 3.28E-02 | -3.63  | 16.91 | 8.30E-01 | -20.86 | 36.39  | 5.66E-01 | -17.99 | 8.35  | 3.13E-02 | -11.11 | 26.93 | 6.80E-01 |
| cg06834005 | -7.53  | 3.53  | 3.28E-02 | -14.70 | 8.64  | 8.89E-02 | -4.02  | 16.97  | 8.13E-01 | -6.08  | 4.32  | 1.59E-01 | -6.93  | 10.04 | 4.90E-01 |
| cg00454734 | 13.36  | 6.26  | 3.28E-02 | 1.37   | 17.07 | 9.36E-01 | 15.70  | 13.58  | 2.48E-01 | 13.78  | 8.13  | 9.03E-02 | 27.67  | 25.38 | 2.76E-01 |
| cg23256579 | -5.51  | 2.58  | 3.28E-02 | -4.10  | 3.81  | 2.81E-01 | -5.06  | 5.18   | 3.28E-01 | -9.52  | 6.00  | 1.13E-01 | -5.70  | 7.93  | 4.72E-01 |
| cg27543385 | -10.47 | 4.90  | 3.28E-02 | -12.79 | 6.67  | 5.51E-02 | -19.81 | 8.34   | 1.75E-02 | -11.48 | 13.01 | 3.77E-01 | 3.07   | 8.55  | 7.20E-01 |
| cg14069049 | 14.61  | 6.84  | 3.28E-02 | 24.91  | 17.31 | 1.50E-01 | 32.75  | 26.95  | 2.24E-01 | 10.56  | 9.05  | 2.43E-01 | 12.39  | 15.04 | 4.10E-01 |
| cg05358729 | 21.19  | 9.92  | 3.28E-02 | 24.29  | 13.33 | 6.85E-02 | -29.10 | 32.43  | 3.70E-01 | 19.74  | 30.81 | 5.22E-01 | 33.80  | 19.90 | 8.94E-02 |
| cg18036653 | 16.82  | 7.88  | 3.28E-02 | 20.82  | 12.94 | 1.07E-01 | 3.66   | 15.73  | 8.16E-01 | 14.21  | 17.54 | 4.18E-01 | 30.09  | 18.76 | 1.09E-01 |
| cg02500392 | -8.22  | 3.85  | 3.28E-02 | -16.26 | 8.54  | 5.69E-02 | -7.37  | 11.66  | 5.27E-01 | -4.82  | 5.17  | 3.51E-01 | -10.80 | 10.58 | 3.07E-01 |
| cg26888063 | 11.93  | 5.59  | 3.28E-02 | -5.88  | 14.97 | 6.95E-01 | 33.77  | 25.64  | 1.88E-01 | 14.20  | 6.56  | 3.03E-02 | 9.50   | 18.99 | 6.17E-01 |
| cg17385414 | 17.69  | 8.29  | 3.28E-02 | 15.15  | 16.28 | 3.52E-01 | 13.26  | 19.70  | 5.01E-01 | 23.68  | 12.00 | 4.84E-02 | 1.34   | 28.10 | 9.62E-01 |
| cg16267376 | 35.90  | 16.82 | 3.28E-02 | 30.32  | 20.69 | 1.43E-01 | 135.70 | 78.98  | 8.58E-02 | -25.58 | 83.50 | 7.59E-01 | 42.46  | 33.45 | 2.04E-01 |
| cg22535057 | -14.75 | 6.91  | 3.28E-02 | -1.61  | 11.26 | 8.86E-01 | -4.81  | 20.59  | 8.15E-01 | -29.09 | 12.63 | 2.12E-02 | -21.42 | 13.53 | 1.14E-01 |

|            |        |       |          |        |       |          |         |        |          |        |       |          |        |       |          |
|------------|--------|-------|----------|--------|-------|----------|---------|--------|----------|--------|-------|----------|--------|-------|----------|
| cg16042259 | 15.97  | 7.48  | 3.28E-02 | 10.00  | 10.16 | 3.25E-01 | 23.13   | 21.12  | 2.73E-01 | -0.34  | 29.45 | 9.91E-01 | 28.64  | 14.46 | 4.77E-02 |
| cg24662698 | 12.58  | 5.90  | 3.28E-02 | 15.74  | 11.86 | 1.84E-01 | 16.59   | 14.69  | 2.59E-01 | 14.67  | 11.32 | 1.95E-01 | 6.37   | 10.42 | 5.41E-01 |
| cg04556393 | 10.03  | 4.70  | 3.28E-02 | 0.88   | 13.71 | 9.49E-01 | 39.80   | 28.26  | 1.59E-01 | 10.38  | 5.21  | 4.63E-02 | 9.24   | 23.28 | 6.91E-01 |
| cg26004221 | -10.21 | 4.78  | 3.28E-02 | -16.19 | 7.30  | 2.65E-02 | -7.88   | 11.96  | 5.10E-01 | -6.28  | 13.04 | 6.30E-01 | -4.17  | 9.09  | 6.47E-01 |
| cg11147878 | -6.70  | 3.14  | 3.28E-02 | -5.00  | 6.11  | 4.13E-01 | -8.04   | 8.18   | 3.26E-01 | -5.37  | 4.87  | 2.71E-01 | -11.30 | 7.52  | 1.33E-01 |
| cg07843120 | 15.28  | 7.16  | 3.28E-02 | 14.60  | 9.25  | 1.15E-01 | 18.47   | 22.80  | 4.18E-01 | 12.88  | 23.51 | 5.84E-01 | 16.78  | 15.63 | 2.83E-01 |
| cg20521198 | -10.43 | 4.88  | 3.28E-02 | -17.05 | 7.87  | 3.02E-02 | 0.86    | 11.58  | 9.41E-01 | -10.85 | 12.16 | 3.72E-01 | -8.19  | 9.31  | 3.79E-01 |
| cg18118503 | -11.28 | 5.28  | 3.28E-02 | -9.76  | 9.84  | 3.21E-01 | 4.23    | 18.18  | 8.16E-01 | -15.43 | 7.21  | 3.24E-02 | -5.93  | 17.57 | 7.36E-01 |
| cg05081033 | -5.83  | 2.73  | 3.28E-02 | -3.27  | 4.56  | 4.73E-01 | -11.18  | 6.35   | 7.85E-02 | -9.05  | 4.78  | 5.85E-02 | 2.82   | 7.59  | 7.10E-01 |
| cg18482098 | 39.16  | 18.35 | 3.28E-02 | 31.39  | 42.25 | 4.57E-01 | -222.36 | 150.16 | 1.39E-01 | 42.60  | 16.49 | 9.77E-03 | 64.70  | 54.00 | 2.31E-01 |
| cg00865541 | 15.10  | 7.07  | 3.28E-02 | 10.26  | 11.80 | 3.85E-01 | 16.27   | 14.31  | 2.55E-01 | 29.69  | 14.01 | 3.40E-02 | -1.05  | 18.86 | 9.56E-01 |
| cg11352369 | 16.25  | 7.62  | 3.28E-02 | 19.78  | 13.81 | 1.52E-01 | 3.25    | 19.00  | 8.64E-01 | 13.58  | 11.64 | 2.43E-01 | 36.53  | 23.34 | 1.17E-01 |
| cg26511108 | 8.63   | 4.05  | 3.28E-02 | 9.34   | 5.55  | 9.26E-02 | 3.68    | 9.98   | 7.12E-01 | 8.54   | 13.58 | 5.30E-01 | 10.68  | 8.69  | 2.19E-01 |
| cg02240936 | 24.40  | 11.44 | 3.29E-02 | 17.40  | 21.96 | 4.28E-01 | 36.87   | 52.98  | 4.86E-01 | 16.95  | 15.24 | 2.66E-01 | 70.59  | 33.11 | 3.30E-02 |
| cg04231636 | 10.75  | 5.04  | 3.29E-02 | 18.64  | 7.75  | 1.61E-02 | 9.03    | 11.51  | 4.33E-01 | 9.63   | 11.78 | 4.14E-01 | -3.02  | 11.16 | 7.87E-01 |
| cg14281591 | 4.65   | 2.18  | 3.29E-02 | 3.81   | 3.18  | 2.32E-01 | 7.16    | 4.81   | 1.36E-01 | 6.44   | 4.63  | 1.64E-01 | -0.30  | 6.73  | 9.64E-01 |
| cg06669759 | 21.98  | 10.30 | 3.29E-02 | 27.84  | 16.71 | 9.57E-02 | 36.42   | 64.62  | 5.73E-01 | 58.42  | 27.84 | 3.59E-02 | 6.06   | 14.78 | 6.82E-01 |
| cg23484899 | 8.38   | 3.93  | 3.29E-02 | 5.78   | 6.77  | 3.93E-01 | 7.50    | 8.87   | 3.98E-01 | 13.32  | 7.05  | 5.88E-02 | 5.28   | 9.93  | 5.95E-01 |
| cg27008363 | 11.43  | 5.36  | 3.29E-02 | 16.69  | 12.48 | 1.81E-01 | 10.63   | 17.72  | 5.49E-01 | 7.72   | 6.86  | 2.61E-01 | 23.49  | 15.88 | 1.39E-01 |
| cg11808658 | 12.36  | 5.79  | 3.29E-02 | 7.46   | 10.40 | 4.73E-01 | 29.79   | 13.29  | 2.50E-02 | 5.03   | 7.51  | 5.03E-01 | 24.61  | 15.72 | 1.18E-01 |
| cg17642941 | 10.16  | 4.76  | 3.29E-02 | 10.37  | 6.88  | 1.32E-01 | 16.00   | 10.54  | 1.29E-01 | 1.85   | 14.20 | 8.96E-01 | 8.42   | 10.55 | 4.25E-01 |
| cg11105830 | 18.88  | 8.85  | 3.29E-02 | 8.67   | 14.53 | 5.51E-01 | 9.84    | 17.73  | 5.79E-01 | 31.63  | 19.23 | 1.00E-01 | 38.67  | 21.56 | 7.28E-02 |
| cg25164237 | 10.89  | 5.10  | 3.29E-02 | 16.91  | 7.42  | 2.27E-02 | 3.62    | 12.72  | 7.76E-01 | 16.78  | 12.84 | 1.91E-01 | -1.60  | 11.16 | 8.86E-01 |
| cg02050028 | -12.16 | 5.70  | 3.29E-02 | -12.81 | 9.28  | 1.67E-01 | 7.73    | 12.12  | 5.24E-01 | -16.55 | 8.01  | 3.89E-02 | -23.42 | 12.60 | 6.30E-02 |
| cg26345037 | 36.11  | 16.93 | 3.29E-02 | 8.34   | 26.36 | 7.52E-01 | 16.36   | 104.65 | 8.76E-01 | 65.59  | 27.77 | 1.82E-02 | 41.45  | 38.81 | 2.85E-01 |
| cg08685733 | -8.62  | 4.04  | 3.29E-02 | -5.88  | 5.76  | 3.07E-01 | -8.39   | 8.92   | 3.47E-01 | -5.45  | 11.61 | 6.39E-01 | -18.36 | 9.46  | 5.24E-02 |
| cg09682311 | -36.19 | 16.97 | 3.29E-02 | -46.04 | 21.61 | 3.31E-02 | -100.37 | 93.26  | 2.82E-01 | 68.02  | 77.32 | 3.79E-01 | -25.69 | 30.86 | 4.05E-01 |
| cg17270843 | 11.08  | 5.20  | 3.29E-02 | 12.95  | 9.31  | 1.64E-01 | 4.86    | 9.44   | 6.06E-01 | 17.36  | 13.04 | 1.83E-01 | 12.44  | 10.91 | 2.54E-01 |
| cg06763054 | 11.31  | 5.30  | 3.29E-02 | 26.84  | 11.44 | 1.89E-02 | 7.79    | 12.55  | 5.35E-01 | 12.85  | 8.93  | 1.50E-01 | 0.93   | 9.39  | 9.21E-01 |
| cg02023548 | -11.82 | 5.54  | 3.29E-02 | -17.29 | 8.90  | 5.20E-02 | 0.34    | 12.88  | 9.79E-01 | -10.51 | 14.02 | 4.53E-01 | -13.05 | 10.65 | 2.20E-01 |
| cg21673240 | 15.88  | 7.44  | 3.29E-02 | 37.71  | 19.82 | 5.71E-02 | -18.19  | 30.98  | 5.57E-01 | 15.44  | 8.79  | 7.87E-02 | 6.25   | 25.82 | 8.09E-01 |
| cg25587233 | 11.44  | 5.36  | 3.29E-02 | 7.48   | 6.77  | 2.69E-01 | 29.05   | 13.67  | 3.36E-02 | 13.38  | 19.98 | 5.03E-01 | 8.93   | 14.00 | 5.24E-01 |
| cg02129122 | 16.75  | 7.85  | 3.29E-02 | 4.08   | 17.73 | 8.18E-01 | 15.94   | 26.99  | 5.55E-01 | 16.89  | 9.92  | 8.86E-02 | 43.34  | 25.80 | 9.30E-02 |
| cg09096787 | 7.00   | 3.28  | 3.29E-02 | 6.68   | 4.56  | 1.43E-01 | 13.49   | 7.87   | 8.65E-02 | 10.30  | 12.18 | 3.98E-01 | 1.92   | 6.74  | 7.76E-01 |
| cg02812207 | 14.14  | 6.63  | 3.29E-02 | 26.13  | 10.84 | 1.60E-02 | 3.30    | 22.38  | 8.83E-01 | 11.57  | 13.49 | 3.91E-01 | 4.36   | 12.15 | 7.20E-01 |



|            |        |       |          |         |       |          |         |        |          |        |        |          |        |       |          |
|------------|--------|-------|----------|---------|-------|----------|---------|--------|----------|--------|--------|----------|--------|-------|----------|
| cg24002839 | 52.13  | 24.44 | 3.29E-02 | 97.58   | 64.59 | 1.31E-01 | -206.94 | 251.19 | 4.10E-01 | 47.28  | 28.40  | 9.60E-02 | 47.82  | 74.81 | 5.23E-01 |
| cg19069360 | 5.68   | 2.66  | 3.29E-02 | 3.79    | 3.49  | 2.78E-01 | 8.67    | 5.84   | 1.38E-01 | 12.29  | 9.44   | 1.93E-01 | 5.33   | 7.37  | 4.70E-01 |
| cg15749157 | 11.46  | 5.37  | 3.29E-02 | 14.74   | 9.94  | 1.38E-01 | 13.97   | 10.60  | 1.88E-01 | 11.77  | 9.98   | 2.38E-01 | 0.94   | 13.40 | 9.44E-01 |
| cg18256205 | -6.55  | 3.07  | 3.29E-02 | -5.50   | 4.57  | 2.28E-01 | -1.82   | 6.47   | 7.79E-01 | -16.12 | 8.17   | 4.86E-02 | -7.61  | 7.22  | 2.92E-01 |
| cg17663235 | 30.12  | 14.12 | 3.29E-02 | 1.21    | 38.99 | 9.75E-01 | 168.26  | 211.82 | 4.27E-01 | 36.69  | 16.04  | 2.21E-02 | 8.63   | 47.25 | 8.55E-01 |
| cg24830559 | 15.05  | 7.06  | 3.29E-02 | 3.00    | 16.47 | 8.55E-01 | 21.02   | 41.96  | 6.16E-01 | 17.47  | 8.40   | 3.75E-02 | 19.21  | 24.74 | 4.37E-01 |
| cg05457923 | -18.52 | 8.68  | 3.29E-02 | -39.74  | 35.29 | 2.60E-01 | -52.41  | 114.43 | 6.47E-01 | -16.18 | 9.28   | 8.14E-02 | -28.04 | 35.64 | 4.31E-01 |
| cg22775860 | 13.51  | 6.33  | 3.29E-02 | 8.24    | 12.86 | 5.21E-01 | 19.02   | 29.25  | 5.15E-01 | 16.80  | 8.05   | 3.69E-02 | 2.36   | 20.95 | 9.10E-01 |
| cg15748470 | 12.23  | 5.74  | 3.29E-02 | 18.79   | 15.54 | 2.27E-01 | 31.66   | 55.70  | 5.70E-01 | 8.84   | 6.81   | 1.94E-01 | 21.39  | 15.17 | 1.58E-01 |
| cg14549078 | 14.27  | 6.69  | 3.29E-02 | 35.53   | 16.27 | 2.89E-02 | 4.48    | 19.79  | 8.21E-01 | 10.22  | 8.45   | 2.26E-01 | 14.93  | 22.37 | 5.04E-01 |
| cg25729560 | -13.19 | 6.18  | 3.29E-02 | -18.16  | 14.93 | 2.24E-01 | -40.25  | 28.29  | 1.55E-01 | -7.45  | 6.62   | 2.61E-01 | -38.90 | 22.01 | 7.72E-02 |
| cg03945663 | 21.17  | 9.93  | 3.30E-02 | 8.88    | 19.68 | 6.52E-01 | 22.43   | 20.91  | 2.83E-01 | 30.64  | 16.61  | 6.50E-02 | 17.86  | 24.60 | 4.68E-01 |
| cg13923018 | 21.48  | 10.07 | 3.30E-02 | 24.11   | 14.23 | 9.03E-02 | 15.11   | 28.26  | 5.93E-01 | 34.36  | 34.31  | 3.17E-01 | 15.82  | 18.83 | 4.01E-01 |
| cg26426938 | 13.58  | 6.37  | 3.30E-02 | 13.02   | 9.47  | 1.69E-01 | 17.75   | 17.22  | 3.03E-01 | 27.57  | 18.46  | 1.35E-01 | 6.81   | 11.79 | 5.64E-01 |
| cg08418670 | 5.07   | 2.38  | 3.30E-02 | 3.60    | 2.81  | 2.00E-01 | 11.67   | 5.88   | 4.71E-02 | 13.01  | 11.33  | 2.51E-01 | 0.18   | 8.55  | 9.84E-01 |
| cg06965590 | 18.45  | 8.65  | 3.30E-02 | 20.23   | 19.25 | 2.93E-01 | 44.14   | 32.02  | 1.68E-01 | 9.84   | 8.24   | 2.32E-01 | 53.78  | 26.63 | 4.34E-02 |
| cg17067226 | -8.07  | 3.78  | 3.30E-02 | -7.73   | 7.80  | 3.22E-01 | -12.34  | 11.40  | 2.79E-01 | -4.43  | 5.28   | 4.01E-01 | -18.44 | 10.04 | 6.63E-02 |
| cg22531668 | 13.36  | 6.27  | 3.30E-02 | 13.27   | 8.92  | 1.37E-01 | -1.47   | 17.50  | 9.33E-01 | 10.18  | 20.51  | 6.20E-01 | 21.26  | 11.75 | 7.04E-02 |
| cg25967146 | 18.09  | 8.48  | 3.30E-02 | 17.54   | 17.39 | 3.13E-01 | -2.23   | 30.93  | 9.43E-01 | 19.39  | 11.36  | 8.78E-02 | 25.32  | 23.60 | 2.83E-01 |
| cg01254707 | -10.53 | 4.94  | 3.30E-02 | -11.15  | 11.80 | 3.45E-01 | -26.32  | 19.98  | 1.88E-01 | -9.16  | 6.13   | 1.35E-01 | -8.92  | 14.65 | 5.42E-01 |
| cg07603056 | 18.22  | 8.54  | 3.30E-02 | 21.84   | 25.29 | 3.88E-01 | 30.90   | 97.67  | 7.52E-01 | 20.65  | 9.60   | 3.14E-02 | -10.34 | 29.25 | 7.24E-01 |
| cg03867871 | -38.93 | 18.26 | 3.30E-02 | -36.86  | 22.58 | 1.03E-01 | -78.35  | 91.69  | 3.93E-01 | 35.69  | 78.04  | 6.47E-01 | -54.33 | 36.40 | 1.36E-01 |
| cg25189764 | -8.50  | 3.99  | 3.30E-02 | -13.85  | 9.33  | 1.38E-01 | -3.10   | 16.40  | 8.50E-01 | -6.28  | 4.91   | 2.01E-01 | -16.61 | 12.65 | 1.89E-01 |
| cg22499797 | 13.46  | 6.31  | 3.30E-02 | 15.52   | 9.81  | 1.13E-01 | 14.74   | 12.67  | 2.45E-01 | -7.57  | 17.08  | 6.58E-01 | 21.89  | 14.07 | 1.20E-01 |
| cg01214063 | -8.23  | 3.86  | 3.30E-02 | -14.21  | 8.16  | 8.16E-02 | 12.63   | 15.20  | 4.06E-01 | -7.81  | 5.06   | 1.22E-01 | -10.12 | 10.69 | 3.44E-01 |
| cg19739596 | 6.01   | 2.82  | 3.30E-02 | 5.82    | 3.57  | 1.03E-01 | 9.05    | 7.52   | 2.29E-01 | 8.23   | 8.39   | 3.27E-01 | 1.52   | 7.95  | 8.48E-01 |
| cg00945663 | 19.67  | 9.23  | 3.30E-02 | 25.68   | 17.47 | 1.42E-01 | 23.90   | 18.11  | 1.87E-01 | 2.38   | 16.64  | 8.86E-01 | 36.11  | 23.47 | 1.24E-01 |
| cg15092561 | 13.19  | 6.19  | 3.30E-02 | 25.94   | 12.25 | 3.42E-02 | 9.39    | 13.81  | 4.96E-01 | 16.98  | 10.16  | 9.46E-02 | -4.83  | 13.39 | 7.18E-01 |
| cg11254053 | 4.86   | 2.28  | 3.30E-02 | 3.74    | 2.98  | 2.09E-01 | 10.58   | 5.23   | 4.29E-02 | 5.50   | 7.30   | 4.51E-01 | 0.91   | 6.45  | 8.87E-01 |
| cg20180050 | -13.07 | 6.13  | 3.30E-02 | -31.36  | 12.96 | 1.55E-02 | -21.46  | 26.30  | 4.15E-01 | -7.04  | 7.83   | 3.68E-01 | -5.19  | 18.59 | 7.80E-01 |
| cg23955334 | -8.98  | 4.21  | 3.30E-02 | -14.61  | 7.60  | 5.45E-02 | 7.18    | 13.76  | 6.02E-01 | -7.10  | 5.71   | 2.14E-01 | -23.32 | 17.82 | 1.91E-01 |
| cg05992875 | -97.97 | 45.95 | 3.30E-02 | -147.48 | 61.69 | 1.68E-02 | 241.83  | 256.82 | 3.46E-01 | -85.81 | 109.49 | 4.33E-01 | -37.00 | 94.37 | 6.95E-01 |
| cg10488031 | 13.93  | 6.53  | 3.30E-02 | 12.88   | 9.41  | 1.71E-01 | 13.47   | 15.45  | 3.83E-01 | 3.57   | 19.29  | 8.53E-01 | 21.82  | 13.78 | 1.13E-01 |
| cg08561732 | 15.30  | 7.18  | 3.30E-02 | 12.24   | 9.18  | 1.83E-01 | 31.69   | 30.74  | 3.03E-01 | -10.50 | 27.68  | 7.04E-01 | 25.47  | 13.89 | 6.66E-02 |
| cg19384379 | 15.27  | 7.16  | 3.30E-02 | 11.46   | 10.72 | 2.85E-01 | 20.32   | 15.22  | 1.82E-01 | 26.05  | 20.79  | 2.10E-01 | 12.02  | 15.49 | 4.38E-01 |

|            |        |       |          |        |       |          |         |        |          |        |       |          |        |       |          |
|------------|--------|-------|----------|--------|-------|----------|---------|--------|----------|--------|-------|----------|--------|-------|----------|
| cg11482719 | 14.93  | 7.00  | 3.30E-02 | 24.27  | 11.16 | 2.97E-02 | 12.83   | 20.82  | 5.38E-01 | 25.08  | 16.84 | 1.36E-01 | -1.26  | 12.37 | 9.19E-01 |
| cg14284211 | 10.59  | 4.97  | 3.30E-02 | 9.50   | 6.21  | 1.26E-01 | 27.64   | 13.99  | 4.82E-02 | 3.54   | 17.35 | 8.38E-01 | 4.83   | 12.75 | 7.04E-01 |
| cg13378643 | -15.61 | 7.32  | 3.30E-02 | -23.70 | 10.97 | 3.07E-02 | -12.18  | 17.18  | 4.78E-01 | -16.83 | 16.88 | 3.19E-01 | 1.82   | 17.06 | 9.15E-01 |
| cg12320621 | 17.57  | 8.24  | 3.30E-02 | 26.81  | 18.18 | 1.40E-01 | 31.78   | 23.51  | 1.76E-01 | 7.84   | 10.89 | 4.71E-01 | 37.14  | 26.25 | 1.57E-01 |
| cg21028182 | -14.92 | 7.00  | 3.30E-02 | -10.26 | 19.34 | 5.96E-01 | -28.45  | 42.29  | 5.01E-01 | -14.03 | 8.05  | 8.15E-02 | -25.67 | 23.95 | 2.84E-01 |
| cg05683049 | 16.28  | 7.64  | 3.30E-02 | 14.09  | 10.04 | 1.61E-01 | 8.50    | 19.19  | 6.58E-01 | 54.69  | 48.48 | 2.59E-01 | 22.80  | 15.66 | 1.45E-01 |
| cg06886736 | -28.40 | 13.32 | 3.30E-02 | -19.22 | 35.73 | 5.91E-01 | -244.71 | 154.91 | 1.14E-01 | -29.95 | 15.41 | 5.19E-02 | -14.36 | 40.95 | 7.26E-01 |
| cg26717786 | -22.55 | 10.58 | 3.30E-02 | -15.12 | 13.57 | 2.65E-01 | -62.01  | 25.75  | 1.60E-02 | -13.41 | 44.58 | 7.64E-01 | -12.82 | 25.84 | 6.20E-01 |
| cg01520853 | 19.31  | 9.06  | 3.30E-02 | 35.69  | 17.88 | 4.60E-02 | 25.87   | 18.10  | 1.53E-01 | 11.49  | 15.24 | 4.51E-01 | -2.76  | 24.22 | 9.09E-01 |
| cg02449461 | 10.03  | 4.71  | 3.30E-02 | 12.27  | 7.05  | 8.20E-02 | 17.49   | 10.66  | 1.01E-01 | 13.77  | 11.38 | 2.26E-01 | -6.35  | 10.84 | 5.58E-01 |
| cg15367000 | -13.77 | 6.46  | 3.30E-02 | -27.27 | 13.53 | 4.39E-02 | 14.84   | 20.32  | 4.65E-01 | -12.82 | 8.12  | 1.14E-01 | -19.46 | 23.59 | 4.09E-01 |
| cg20334079 | -5.48  | 2.57  | 3.30E-02 | -4.46  | 3.88  | 2.51E-01 | -7.52   | 5.86   | 2.00E-01 | -6.21  | 5.58  | 2.66E-01 | -4.84  | 6.46  | 4.54E-01 |
| cg18906002 | 12.08  | 5.67  | 3.30E-02 | 18.16  | 9.18  | 4.80E-02 | 11.49   | 10.69  | 2.82E-01 | 10.65  | 19.74 | 5.90E-01 | 4.13   | 11.19 | 7.12E-01 |
| cg27027631 | 9.93   | 4.66  | 3.31E-02 | 10.05  | 6.01  | 9.47E-02 | 9.88    | 13.42  | 4.62E-01 | 25.00  | 16.73 | 1.35E-01 | 3.83   | 10.34 | 7.11E-01 |
| cg06741096 | -11.17 | 5.24  | 3.31E-02 | -6.51  | 13.08 | 6.19E-01 | -25.77  | 26.01  | 3.22E-01 | -9.71  | 6.15  | 1.14E-01 | -28.03 | 19.53 | 1.51E-01 |
| cg17433211 | -19.08 | 8.95  | 3.31E-02 | -10.64 | 13.21 | 4.20E-01 | -28.92  | 23.98  | 2.28E-01 | -31.91 | 30.31 | 2.93E-01 | -23.48 | 15.96 | 1.41E-01 |
| cg16670446 | 14.29  | 6.70  | 3.31E-02 | 7.03   | 10.23 | 4.92E-01 | 5.68    | 13.90  | 6.83E-01 | 28.41  | 15.66 | 6.97E-02 | 30.64  | 17.03 | 7.20E-02 |
| cg27380429 | 12.79  | 6.00  | 3.31E-02 | -0.77  | 14.74 | 9.58E-01 | -3.79   | 29.83  | 8.99E-01 | 13.88  | 7.37  | 5.96E-02 | 29.48  | 16.56 | 7.51E-02 |
| cg17736259 | 17.83  | 8.37  | 3.31E-02 | 25.82  | 16.67 | 1.21E-01 | 13.30   | 25.51  | 6.02E-01 | 8.72   | 8.49  | 3.04E-01 | 53.49  | 24.03 | 2.60E-02 |
| cg26715883 | -21.17 | 9.93  | 3.31E-02 | -20.78 | 21.94 | 3.44E-01 | -70.63  | 50.73  | 1.64E-01 | -18.02 | 12.35 | 1.45E-01 | -23.17 | 29.94 | 4.39E-01 |
| cg15377871 | 5.19   | 2.43  | 3.31E-02 | 3.47   | 2.98  | 2.43E-01 | 11.06   | 5.89   | 6.05E-02 | 3.06   | 8.93  | 7.32E-01 | 8.77   | 8.35  | 2.94E-01 |
| cg01975495 | 9.03   | 4.24  | 3.31E-02 | 8.50   | 5.96  | 1.54E-01 | 10.32   | 10.86  | 3.42E-01 | 1.19   | 9.62  | 9.01E-01 | 19.73  | 10.99 | 7.27E-02 |
| cg05257275 | 8.90   | 4.18  | 3.31E-02 | 7.56   | 5.62  | 1.79E-01 | 10.88   | 9.82   | 2.68E-01 | 24.28  | 14.99 | 1.05E-01 | 4.62   | 9.61  | 6.30E-01 |
| cg01462668 | -8.02  | 3.76  | 3.31E-02 | -16.37 | 6.50  | 1.18E-02 | 0.10    | 6.76   | 9.88E-01 | -10.18 | 5.92  | 8.56E-02 | -2.39  | 8.97  | 7.90E-01 |
| cg08361126 | 16.54  | 7.76  | 3.31E-02 | 30.57  | 12.02 | 1.10E-02 | 1.60    | 18.83  | 9.32E-01 | 26.27  | 21.27 | 2.17E-01 | 3.65   | 13.15 | 7.81E-01 |
| cg17168636 | 28.78  | 13.51 | 3.31E-02 | 9.95   | 37.18 | 7.89E-01 | -6.13   | 148.47 | 9.67E-01 | 29.96  | 15.17 | 4.82E-02 | 56.41  | 52.35 | 2.81E-01 |
| cg00414898 | 45.87  | 21.52 | 3.31E-02 | 62.52  | 30.62 | 4.12E-02 | 86.48   | 78.96  | 2.73E-01 | 33.42  | 57.86 | 5.64E-01 | 13.40  | 39.75 | 7.36E-01 |
| cg00702030 | -37.77 | 17.72 | 3.31E-02 | -85.66 | 54.84 | 1.18E-01 | -182.04 | 205.85 | 3.77E-01 | -37.43 | 19.78 | 5.85E-02 | 30.20  | 60.67 | 6.19E-01 |
| cg07534331 | 30.13  | 14.14 | 3.31E-02 | 29.71  | 17.27 | 8.54E-02 | 43.19   | 67.10  | 5.20E-01 | 22.77  | 69.77 | 7.44E-01 | 30.13  | 28.59 | 2.92E-01 |
| cg04001941 | -10.57 | 4.96  | 3.31E-02 | -13.26 | 14.48 | 3.60E-01 | -14.81  | 17.85  | 4.07E-01 | -7.13  | 5.75  | 2.15E-01 | -42.04 | 20.10 | 3.64E-02 |
| cg13685680 | 18.36  | 8.62  | 3.31E-02 | 10.43  | 17.68 | 5.55E-01 | 13.10   | 14.57  | 3.68E-01 | 18.95  | 16.46 | 2.49E-01 | 44.13  | 23.17 | 5.68E-02 |
| cg27521562 | 9.93   | 4.66  | 3.31E-02 | 11.59  | 6.89  | 9.29E-02 | 4.82    | 9.78   | 6.22E-01 | 16.20  | 13.65 | 2.35E-01 | 8.28   | 10.42 | 4.27E-01 |
| cg20702205 | -14.14 | 6.64  | 3.31E-02 | -14.43 | 16.36 | 3.78E-01 | -23.98  | 30.09  | 4.25E-01 | -15.53 | 8.03  | 5.33E-02 | -0.06  | 20.52 | 9.98E-01 |
| cg15360181 | -7.07  | 3.32  | 3.31E-02 | -9.22  | 4.68  | 4.88E-02 | -4.75   | 7.49   | 5.26E-01 | -2.24  | 8.55  | 7.94E-01 | -7.75  | 8.55  | 3.65E-01 |
| cg05193538 | 8.96   | 4.21  | 3.31E-02 | 12.61  | 6.28  | 4.46E-02 | 4.63    | 11.28  | 6.81E-01 | 8.81   | 8.72  | 3.12E-01 | 3.40   | 9.91  | 7.32E-01 |

|            |        |       |          |         |       |          |         |        |          |        |       |          |        |       |          |
|------------|--------|-------|----------|---------|-------|----------|---------|--------|----------|--------|-------|----------|--------|-------|----------|
| cg08473764 | 13.78  | 6.47  | 3.31E-02 | 7.35    | 6.25  | 2.40E-01 | 31.89   | 8.93   | 3.55E-04 | 18.24  | 6.83  | 7.57E-03 | -2.04  | 9.28  | 8.26E-01 |
| cg16806041 | -6.02  | 2.83  | 3.31E-02 | -6.39   | 4.28  | 1.35E-01 | -3.39   | 5.96   | 5.69E-01 | -3.81  | 7.26  | 6.00E-01 | -10.12 | 6.54  | 1.22E-01 |
| cg05981335 | 10.81  | 5.08  | 3.31E-02 | 18.02   | 8.63  | 3.68E-02 | 5.73    | 13.53  | 6.72E-01 | 17.72  | 11.98 | 1.39E-01 | 1.78   | 8.78  | 8.39E-01 |
| cg03065090 | -9.64  | 4.52  | 3.31E-02 | -13.77  | 10.20 | 1.77E-01 | 6.18    | 12.62  | 6.25E-01 | -9.45  | 6.13  | 1.23E-01 | -19.72 | 12.50 | 1.15E-01 |
| cg23760165 | 33.35  | 15.65 | 3.31E-02 | 24.22   | 37.34 | 5.16E-01 | -45.46  | 238.27 | 8.49E-01 | 39.23  | 18.40 | 3.30E-02 | 9.30   | 50.44 | 8.54E-01 |
| cg09885086 | -46.31 | 21.74 | 3.31E-02 | -29.82  | 29.33 | 3.09E-01 | -125.44 | 76.32  | 1.00E-01 | -28.05 | 61.36 | 6.48E-01 | -66.47 | 43.98 | 1.31E-01 |
| cg14750277 | 19.66  | 9.23  | 3.31E-02 | 29.56   | 15.97 | 6.43E-02 | 15.25   | 25.51  | 5.50E-01 | 24.71  | 22.03 | 2.62E-01 | 9.63   | 15.37 | 5.31E-01 |
| cg04016660 | 6.83   | 3.21  | 3.31E-02 | 6.31    | 4.80  | 1.88E-01 | 15.30   | 6.78   | 2.39E-02 | 2.79   | 7.14  | 6.96E-01 | 0.17   | 8.98  | 9.85E-01 |
| cg10739095 | 23.13  | 10.86 | 3.31E-02 | 31.20   | 26.13 | 2.32E-01 | 34.41   | 45.65  | 4.51E-01 | 23.81  | 13.74 | 8.30E-02 | 6.31   | 28.42 | 8.24E-01 |
| cg02289682 | -33.69 | 15.81 | 3.31E-02 | -17.53  | 19.91 | 3.79E-01 | -84.21  | 73.87  | 2.54E-01 | -64.73 | 62.12 | 2.97E-01 | -56.37 | 31.09 | 6.98E-02 |
| cg10483660 | -5.53  | 2.60  | 3.31E-02 | -0.02   | 5.61  | 9.97E-01 | -13.40  | 8.25   | 1.05E-01 | -4.66  | 3.57  | 1.92E-01 | -10.93 | 6.51  | 9.29E-02 |
| cg27641317 | -8.29  | 3.89  | 3.31E-02 | -12.52  | 5.68  | 2.76E-02 | -2.72   | 9.04   | 7.64E-01 | -4.68  | 11.08 | 6.73E-01 | -6.03  | 8.27  | 4.66E-01 |
| cg15901550 | 25.54  | 11.99 | 3.32E-02 | 28.14   | 17.62 | 1.10E-01 | 38.10   | 25.42  | 1.34E-01 | -27.40 | 34.31 | 4.24E-01 | 38.39  | 27.34 | 1.60E-01 |
| cg15442444 | 23.41  | 10.99 | 3.32E-02 | 32.08   | 12.80 | 1.22E-02 | -0.76   | 56.02  | 9.89E-01 | -39.20 | 53.18 | 4.61E-01 | 8.12   | 25.74 | 7.53E-01 |
| cg01226806 | -51.34 | 24.10 | 3.32E-02 | -130.63 | 65.29 | 4.54E-02 | -131.73 | 248.43 | 5.96E-01 | -25.05 | 27.35 | 3.60E-01 | -96.88 | 60.47 | 1.09E-01 |
| cg08219773 | 5.15   | 2.42  | 3.32E-02 | 6.35    | 4.27  | 1.37E-01 | -2.92   | 5.47   | 5.94E-01 | 6.54   | 3.94  | 9.72E-02 | 10.79  | 6.98  | 1.22E-01 |
| cg05517697 | 17.50  | 8.22  | 3.32E-02 | 14.04   | 13.87 | 3.11E-01 | 0.29    | 17.04  | 9.86E-01 | 16.25  | 16.61 | 3.28E-01 | 42.65  | 17.59 | 1.53E-02 |
| cg04800490 | 12.39  | 5.82  | 3.32E-02 | 9.85    | 9.96  | 3.22E-01 | 12.25   | 11.33  | 2.79E-01 | 14.99  | 11.71 | 2.01E-01 | 14.15  | 15.09 | 3.48E-01 |
| cg11621667 | 25.50  | 11.97 | 3.32E-02 | 9.97    | 23.90 | 6.77E-01 | -60.01  | 70.42  | 3.94E-01 | 29.89  | 15.79 | 5.83E-02 | 51.88  | 31.37 | 9.82E-02 |
| cg12889538 | 31.45  | 14.76 | 3.32E-02 | 47.16   | 21.24 | 2.64E-02 | -47.16  | 95.41  | 6.21E-01 | 67.85  | 52.11 | 1.93E-01 | 10.52  | 22.98 | 6.47E-01 |
| cg04554195 | -8.00  | 3.76  | 3.32E-02 | -12.13  | 8.03  | 1.31E-01 | -8.19   | 13.81  | 5.53E-01 | -3.40  | 5.08  | 5.03E-01 | -17.96 | 9.38  | 5.56E-02 |
| cg17277199 | -5.79  | 2.72  | 3.32E-02 | -4.96   | 3.79  | 1.91E-01 | -3.43   | 6.45   | 5.95E-01 | -4.86  | 8.49  | 5.67E-01 | -10.39 | 6.00  | 8.31E-02 |
| cg03553308 | -9.59  | 4.50  | 3.32E-02 | -8.81   | 5.17  | 8.79E-02 | -16.73  | 8.15   | 4.00E-02 | 7.12   | 9.64  | 4.60E-01 | -16.04 | 7.51  | 3.27E-02 |
| cg07721852 | 12.03  | 5.65  | 3.32E-02 | 18.34   | 7.52  | 1.48E-02 | 12.15   | 17.11  | 4.78E-01 | 2.70   | 22.63 | 9.05E-01 | 0.76   | 10.98 | 9.45E-01 |
| cg24854010 | 12.11  | 5.69  | 3.32E-02 | 12.22   | 8.22  | 1.37E-01 | 25.04   | 12.02  | 3.72E-02 | 10.62  | 15.09 | 4.82E-01 | -5.42  | 14.39 | 7.07E-01 |
| cg18110444 | 30.22  | 14.19 | 3.32E-02 | 29.96   | 35.54 | 3.99E-01 | 177.91  | 150.57 | 2.37E-01 | 35.74  | 16.71 | 3.24E-02 | -17.24 | 42.63 | 6.86E-01 |
| cg01042641 | -7.58  | 3.56  | 3.32E-02 | -6.16   | 4.41  | 1.62E-01 | -20.86  | 9.79   | 3.31E-02 | 1.99   | 12.57 | 8.74E-01 | -7.14  | 9.66  | 4.60E-01 |
| cg09110148 | 21.23  | 9.97  | 3.32E-02 | 21.22   | 14.01 | 1.30E-01 | 11.15   | 22.96  | 6.27E-01 | 32.58  | 35.53 | 3.59E-01 | 25.69  | 20.92 | 2.19E-01 |
| cg00090648 | -27.74 | 13.02 | 3.32E-02 | 8.35    | 33.27 | 8.02E-01 | -21.79  | 134.54 | 8.71E-01 | -27.32 | 15.40 | 7.61E-02 | -75.90 | 37.24 | 4.16E-02 |
| cg15838320 | -11.24 | 5.28  | 3.32E-02 | -18.15  | 9.28  | 5.05E-02 | -14.93  | 13.10  | 2.54E-01 | -4.37  | 13.17 | 7.40E-01 | -6.35  | 8.86  | 4.73E-01 |
| cg15125891 | -10.32 | 4.85  | 3.32E-02 | -28.50  | 13.07 | 2.92E-02 | -4.60   | 20.31  | 8.21E-01 | -6.52  | 5.74  | 2.55E-01 | -16.25 | 16.05 | 3.11E-01 |
| cg12044828 | 17.87  | 8.39  | 3.32E-02 | 11.52   | 13.50 | 3.94E-01 | 36.65   | 26.98  | 1.74E-01 | 50.23  | 23.97 | 3.61E-02 | 9.44   | 13.36 | 4.80E-01 |
| cg12699321 | -7.36  | 3.46  | 3.32E-02 | -6.12   | 7.63  | 4.23E-01 | -8.92   | 13.11  | 4.96E-01 | -7.10  | 4.49  | 1.14E-01 | -9.64  | 9.48  | 3.09E-01 |
| cg05133340 | 11.38  | 5.34  | 3.32E-02 | 15.12   | 7.85  | 5.40E-02 | 15.08   | 11.91  | 2.05E-01 | 15.84  | 14.38 | 2.71E-01 | -4.33  | 12.04 | 7.19E-01 |
| cg15773539 | -17.24 | 8.09  | 3.32E-02 | -20.88  | 11.87 | 7.87E-02 | 5.27    | 17.18  | 7.59E-01 | -14.62 | 20.35 | 4.72E-01 | -38.60 | 19.36 | 4.62E-02 |

|            |        |       |          |        |       |          |         |        |          |        |       |          |         |       |          |
|------------|--------|-------|----------|--------|-------|----------|---------|--------|----------|--------|-------|----------|---------|-------|----------|
| cg15785898 | 7.55   | 3.55  | 3.32E-02 | 10.62  | 5.11  | 3.78E-02 | 8.60    | 7.71   | 2.65E-01 | 5.15   | 11.52 | 6.55E-01 | 0.66    | 7.67  | 9.31E-01 |
| cg17285709 | 15.87  | 7.45  | 3.32E-02 | 3.91   | 12.97 | 7.63E-01 | 10.46   | 14.09  | 4.58E-01 | 29.22  | 18.85 | 1.21E-01 | 30.32   | 15.42 | 4.92E-02 |
| cg24834740 | 29.84  | 14.01 | 3.32E-02 | 36.93  | 16.83 | 2.82E-02 | -51.05  | 53.34  | 3.38E-01 | 31.76  | 61.48 | 6.05E-01 | 32.93   | 32.52 | 3.11E-01 |
| cg20980653 | -8.17  | 3.84  | 3.32E-02 | -7.85  | 6.48  | 2.26E-01 | -2.85   | 7.43   | 7.01E-01 | -20.10 | 11.26 | 7.42E-02 | -8.71   | 7.42  | 2.40E-01 |
| cg17939295 | 10.92  | 5.13  | 3.32E-02 | 1.61   | 7.32  | 8.26E-01 | -2.75   | 14.77  | 8.52E-01 | 20.95  | 6.71  | 1.80E-03 | 13.88   | 6.85  | 4.27E-02 |
| cg18721838 | -8.30  | 3.90  | 3.32E-02 | -3.01  | 9.36  | 7.47E-01 | 2.20    | 13.46  | 8.70E-01 | -10.17 | 5.10  | 4.61E-02 | -12.77  | 9.81  | 1.93E-01 |
| cg22004151 | -50.85 | 23.88 | 3.32E-02 | -47.21 | 28.58 | 9.86E-02 | -185.63 | 113.80 | 1.03E-01 | -30.55 | 84.81 | 7.19E-01 | -40.87  | 56.51 | 4.70E-01 |
| cg11978048 | -38.22 | 17.95 | 3.32E-02 | -44.58 | 48.02 | 3.53E-01 | -124.61 | 212.88 | 5.58E-01 | -29.05 | 20.28 | 1.52E-01 | -119.37 | 67.87 | 7.86E-02 |
| cg07532965 | -17.93 | 8.42  | 3.32E-02 | -50.35 | 20.97 | 1.63E-02 | -20.79  | 43.23  | 6.31E-01 | -12.83 | 9.51  | 1.78E-01 | -1.30   | 26.86 | 9.62E-01 |
| cg11193201 | -9.99  | 4.69  | 3.32E-02 | -18.68 | 10.11 | 6.47E-02 | 8.42    | 20.36  | 6.79E-01 | -8.43  | 5.82  | 1.48E-01 | -11.52  | 16.39 | 4.82E-01 |
| cg26322137 | -10.40 | 4.88  | 3.32E-02 | -6.60  | 14.85 | 6.57E-01 | 3.94    | 24.04  | 8.70E-01 | -10.56 | 5.63  | 6.06E-02 | -19.51  | 15.67 | 2.13E-01 |
| cg25533154 | 10.30  | 4.84  | 3.32E-02 | 10.25  | 8.20  | 2.11E-01 | 5.03    | 16.87  | 7.66E-01 | 11.97  | 7.55  | 1.13E-01 | 8.83    | 12.10 | 4.65E-01 |
| cg17207736 | 6.37   | 2.99  | 3.32E-02 | 6.23   | 4.14  | 1.32E-01 | 12.09   | 7.11   | 8.92E-02 | 2.89   | 7.37  | 6.95E-01 | 3.69    | 8.12  | 6.49E-01 |
| cg18528593 | 13.69  | 6.43  | 3.32E-02 | 6.22   | 20.45 | 7.61E-01 | -14.78  | 28.61  | 6.05E-01 | 15.72  | 7.25  | 3.00E-02 | 22.71   | 25.46 | 3.72E-01 |
| cg03072035 | 6.44   | 3.02  | 3.32E-02 | 6.32   | 3.91  | 1.06E-01 | 15.93   | 8.20   | 5.20E-02 | 1.44   | 8.62  | 8.67E-01 | 2.24    | 7.95  | 7.78E-01 |
| cg08682866 | -16.18 | 7.60  | 3.32E-02 | -14.66 | 21.33 | 4.92E-01 | -4.97   | 38.15  | 8.96E-01 | -13.46 | 8.60  | 1.17E-01 | -69.52  | 33.39 | 3.74E-02 |
| cg23535137 | -22.95 | 10.78 | 3.32E-02 | -17.43 | 13.15 | 1.85E-01 | 2.09    | 37.53  | 9.56E-01 | 17.28  | 63.42 | 7.85E-01 | -55.12  | 23.20 | 1.75E-02 |
| cg24989962 | 13.35  | 6.27  | 3.32E-02 | 28.50  | 13.83 | 3.93E-02 | 9.55    | 17.63  | 5.88E-01 | 5.54   | 10.09 | 5.83E-01 | 14.69   | 11.80 | 2.13E-01 |
| cg02983043 | -13.94 | 6.55  | 3.32E-02 | -18.48 | 16.77 | 2.70E-01 | -49.63  | 37.96  | 1.91E-01 | -9.57  | 7.55  | 2.05E-01 | -37.33  | 25.56 | 1.44E-01 |
| cg07783458 | 17.64  | 8.29  | 3.32E-02 | -0.60  | 12.74 | 9.62E-01 | 0.52    | 31.33  | 9.87E-01 | 25.75  | 7.89  | 1.10E-03 | 34.53   | 20.63 | 9.41E-02 |
| cg10689404 | 10.81  | 5.08  | 3.32E-02 | 21.73  | 7.67  | 4.60E-03 | 10.77   | 10.35  | 2.98E-01 | 0.41   | 11.91 | 9.72E-01 | 3.30    | 8.82  | 7.09E-01 |
| cg03798217 | -10.97 | 5.15  | 3.32E-02 | -5.15  | 15.49 | 7.39E-01 | -5.21   | 22.35  | 8.16E-01 | -12.03 | 5.81  | 3.85E-02 | -13.31  | 22.92 | 5.62E-01 |
| cg04332513 | -30.54 | 14.34 | 3.32E-02 | -17.58 | 38.32 | 6.46E-01 | -322.90 | 179.24 | 7.16E-02 | -30.81 | 16.12 | 5.60E-02 | -26.23  | 57.67 | 6.49E-01 |
| cg00121876 | 5.85   | 2.75  | 3.32E-02 | 3.68   | 3.70  | 3.20E-01 | 12.72   | 6.55   | 5.23E-02 | 10.84  | 13.06 | 4.07E-01 | 4.82    | 5.73  | 4.00E-01 |
| cg04798314 | 1.41   | 0.66  | 3.33E-02 | 0.98   | 0.95  | 3.00E-01 | 1.56    | 1.57   | 3.20E-01 | 1.68   | 1.71  | 3.25E-01 | 2.13    | 1.52  | 1.61E-01 |
| cg21546300 | 19.66  | 9.24  | 3.33E-02 | 35.87  | 16.18 | 2.66E-02 | 17.21   | 16.41  | 2.94E-01 | -2.65  | 18.81 | 8.88E-01 | 27.16   | 27.09 | 3.16E-01 |
| cg14709766 | -29.69 | 13.94 | 3.33E-02 | -12.07 | 29.01 | 6.77E-01 | -172.14 | 187.30 | 3.58E-01 | -32.52 | 16.74 | 5.20E-02 | -48.54  | 52.85 | 3.58E-01 |
| cg18116971 | 14.98  | 7.04  | 3.33E-02 | 37.93  | 13.43 | 4.73E-03 | 9.25    | 16.29  | 5.70E-01 | 9.37   | 10.29 | 3.63E-01 | 6.98    | 11.35 | 5.39E-01 |
| cg21462732 | 33.20  | 15.59 | 3.33E-02 | 38.14  | 21.95 | 8.23E-02 | 58.26   | 43.99  | 1.85E-01 | 87.49  | 53.48 | 1.02E-01 | -2.83   | 29.22 | 9.23E-01 |
| cg24186506 | 4.95   | 2.33  | 3.33E-02 | 3.80   | 3.77  | 3.14E-01 | 9.43    | 5.10   | 6.48E-02 | 4.94   | 4.31  | 2.52E-01 | 0.91    | 6.73  | 8.93E-01 |
| cg17895496 | 16.86  | 7.92  | 3.33E-02 | 43.05  | 21.22 | 4.25E-02 | 3.49    | 38.66  | 9.28E-01 | 12.63  | 9.15  | 1.67E-01 | 18.12   | 30.19 | 5.48E-01 |
| cg03730114 | -22.68 | 10.65 | 3.33E-02 | -31.79 | 19.87 | 1.10E-01 | -16.69  | 27.39  | 5.42E-01 | -19.36 | 17.17 | 2.59E-01 | -20.24  | 25.39 | 4.25E-01 |
| cg13934625 | -13.80 | 6.48  | 3.33E-02 | -10.64 | 7.14  | 1.36E-01 | 0.22    | 13.78  | 9.87E-01 | -43.85 | 18.34 | 1.68E-02 | -16.25  | 11.05 | 1.41E-01 |
| cg00250500 | 15.14  | 7.11  | 3.33E-02 | 36.06  | 14.87 | 1.53E-02 | 25.54   | 25.88  | 3.24E-01 | 6.71   | 10.37 | 5.18E-01 | 8.23    | 14.58 | 5.72E-01 |
| cg08145231 | -23.27 | 10.93 | 3.33E-02 | -23.65 | 15.28 | 1.22E-01 | -19.45  | 18.12  | 2.83E-01 | -35.68 | 72.94 | 6.25E-01 | -32.29  | 34.26 | 3.46E-01 |

|            |        |       |          |        |       |          |         |        |          |        |       |          |        |       |          |
|------------|--------|-------|----------|--------|-------|----------|---------|--------|----------|--------|-------|----------|--------|-------|----------|
| cg14239983 | -9.75  | 4.58  | 3.33E-02 | -2.85  | 7.14  | 6.90E-01 | -11.91  | 10.92  | 2.76E-01 | -16.02 | 10.99 | 1.45E-01 | -15.48 | 9.37  | 9.85E-02 |
| cg03650342 | 24.13  | 11.34 | 3.33E-02 | 20.74  | 33.61 | 5.37E-01 | 33.49   | 134.77 | 8.04E-01 | 29.93  | 12.93 | 2.06E-02 | -13.28 | 34.09 | 6.97E-01 |
| cg03885271 | 16.20  | 7.61  | 3.33E-02 | 30.51  | 20.60 | 1.39E-01 | 21.63   | 35.92  | 5.47E-01 | 15.42  | 9.53  | 1.06E-01 | 6.82   | 17.87 | 7.03E-01 |
| cg12008350 | 16.87  | 7.92  | 3.33E-02 | 22.45  | 11.90 | 5.93E-02 | 24.52   | 18.95  | 1.96E-01 | 3.60   | 14.96 | 8.10E-01 | 15.98  | 24.91 | 5.21E-01 |
| cg01714749 | 10.94  | 5.14  | 3.33E-02 | 11.59  | 9.90  | 2.42E-01 | 3.76    | 10.73  | 7.26E-01 | 9.73   | 8.66  | 2.61E-01 | 23.67  | 13.31 | 7.54E-02 |
| cg00000236 | 9.92   | 4.66  | 3.33E-02 | 11.20  | 8.41  | 1.83E-01 | 25.67   | 11.15  | 2.13E-02 | 7.78   | 5.38  | 1.48E-01 | -6.57  | 13.86 | 6.36E-01 |
| cg05286653 | 10.42  | 4.89  | 3.33E-02 | 5.80   | 6.58  | 3.78E-01 | 18.63   | 10.53  | 7.70E-02 | 2.06   | 25.70 | 9.36E-01 | 16.00  | 11.10 | 1.49E-01 |
| cg26476925 | 6.79   | 3.19  | 3.33E-02 | 5.56   | 3.81  | 1.45E-01 | 17.96   | 8.74   | 3.99E-02 | -1.01  | 12.34 | 9.35E-01 | 5.78   | 10.12 | 5.68E-01 |
| cg13795120 | -37.97 | 17.84 | 3.33E-02 | -31.91 | 23.42 | 1.73E-01 | -62.41  | 71.12  | 3.80E-01 | -32.49 | 57.59 | 5.73E-01 | -47.57 | 34.92 | 1.73E-01 |
| cg06059056 | 17.95  | 8.43  | 3.33E-02 | 53.91  | 29.15 | 6.44E-02 | 13.83   | 54.40  | 7.99E-01 | 16.18  | 9.55  | 9.02E-02 | 4.35   | 25.14 | 8.63E-01 |
| cg15615645 | 8.45   | 3.97  | 3.33E-02 | 9.98   | 6.28  | 1.12E-01 | 18.64   | 8.99   | 3.81E-02 | 3.04   | 7.42  | 6.81E-01 | -0.39  | 11.52 | 9.73E-01 |
| cg08641514 | -15.94 | 7.49  | 3.33E-02 | -22.67 | 20.94 | 2.79E-01 | -22.66  | 39.49  | 5.66E-01 | -18.14 | 8.64  | 3.59E-02 | 16.48  | 25.72 | 5.22E-01 |
| cg19313373 | -10.77 | 5.06  | 3.33E-02 | -8.01  | 14.60 | 5.83E-01 | -17.44  | 21.97  | 4.27E-01 | -9.15  | 5.88  | 1.20E-01 | -24.15 | 17.07 | 1.57E-01 |
| cg08767627 | -7.79  | 3.66  | 3.33E-02 | -15.48 | 7.21  | 3.17E-02 | -5.11   | 8.78   | 5.60E-01 | -2.49  | 5.54  | 6.53E-01 | -13.81 | 10.07 | 1.70E-01 |
| cg07893968 | 16.46  | 7.73  | 3.33E-02 | 28.32  | 19.81 | 1.53E-01 | -12.72  | 30.03  | 6.72E-01 | 14.24  | 9.16  | 1.20E-01 | 41.26  | 29.49 | 1.62E-01 |
| cg26256916 | -20.96 | 9.85  | 3.33E-02 | -22.17 | 12.25 | 7.03E-02 | -11.78  | 26.91  | 6.61E-01 | -48.73 | 54.71 | 3.73E-01 | -18.55 | 22.75 | 4.15E-01 |
| cg04392266 | -4.97  | 2.33  | 3.33E-02 | -4.22  | 3.06  | 1.68E-01 | -6.79   | 5.34   | 2.04E-01 | -10.10 | 7.15  | 1.58E-01 | -1.17  | 6.69  | 8.61E-01 |
| cg02128417 | -15.14 | 7.11  | 3.33E-02 | -2.12  | 19.34 | 9.13E-01 | -11.49  | 28.46  | 6.86E-01 | -15.78 | 8.33  | 5.81E-02 | -36.00 | 26.35 | 1.72E-01 |
| cg15432249 | 21.54  | 10.12 | 3.33E-02 | -12.02 | 29.72 | 6.86E-01 | -92.22  | 106.89 | 3.88E-01 | 26.21  | 11.12 | 1.84E-02 | 44.05  | 47.15 | 3.50E-01 |
| cg04780380 | -8.09  | 3.80  | 3.33E-02 | -7.40  | 5.63  | 1.89E-01 | -15.62  | 10.06  | 1.21E-01 | 0.63   | 8.01  | 9.37E-01 | -14.94 | 9.05  | 9.88E-02 |
| cg01408194 | -44.55 | 20.93 | 3.33E-02 | -49.11 | 30.48 | 1.07E-01 | -40.99  | 84.68  | 6.28E-01 | -76.73 | 35.99 | 3.30E-02 | 33.34  | 52.06 | 5.22E-01 |
| cg23490246 | -10.27 | 4.82  | 3.33E-02 | -10.42 | 7.36  | 1.57E-01 | -13.49  | 11.15  | 2.26E-01 | -7.53  | 12.23 | 5.38E-01 | -9.20  | 10.13 | 3.64E-01 |
| cg05991009 | 5.64   | 2.65  | 3.33E-02 | 4.15   | 3.34  | 2.14E-01 | 11.40   | 6.86   | 9.66E-02 | 12.47  | 8.43  | 1.39E-01 | 0.78   | 7.53  | 9.17E-01 |
| cg13676726 | 15.55  | 7.30  | 3.33E-02 | 12.01  | 16.78 | 4.74E-01 | 35.14   | 19.32  | 6.89E-02 | 14.16  | 10.67 | 1.85E-01 | 8.10   | 16.38 | 6.21E-01 |
| cg01458686 | 37.37  | 17.56 | 3.33E-02 | 57.51  | 27.45 | 3.62E-02 | 21.19   | 51.27  | 6.79E-01 | 13.32  | 36.14 | 7.13E-01 | 34.58  | 36.03 | 3.37E-01 |
| cg19096825 | 24.54  | 11.53 | 3.33E-02 | 12.74  | 10.71 | 2.34E-01 | 14.06   | 21.07  | 5.04E-01 | 20.37  | 31.40 | 5.17E-01 | 60.96  | 20.55 | 3.02E-03 |
| cg11996860 | 7.04   | 3.31  | 3.33E-02 | 7.20   | 4.43  | 1.04E-01 | 6.75    | 8.09   | 4.04E-01 | 13.80  | 10.09 | 1.72E-01 | 2.43   | 8.12  | 7.65E-01 |
| cg23344257 | 23.24  | 10.92 | 3.33E-02 | 13.03  | 16.39 | 4.26E-01 | -20.10  | 50.33  | 6.90E-01 | 86.25  | 49.18 | 7.95E-02 | 30.79  | 16.11 | 5.60E-02 |
| cg22043381 | 9.62   | 4.52  | 3.33E-02 | 12.17  | 6.23  | 5.07E-02 | 16.09   | 10.75  | 1.34E-01 | 12.87  | 8.22  | 1.17E-01 | -7.89  | 10.54 | 4.54E-01 |
| cg16479102 | -5.59  | 2.63  | 3.33E-02 | -2.29  | 3.33  | 4.92E-01 | -2.50   | 6.50   | 7.00E-01 | -10.10 | 6.31  | 1.09E-01 | -12.94 | 5.83  | 2.64E-02 |
| cg01601016 | -33.24 | 15.62 | 3.33E-02 | -36.35 | 20.19 | 7.17E-02 | -159.26 | 90.84  | 7.96E-02 | 1.35   | 81.62 | 9.87E-01 | -20.33 | 26.98 | 4.51E-01 |
| cg23180941 | 21.77  | 10.23 | 3.34E-02 | 34.80  | 19.27 | 7.09E-02 | 43.30   | 31.00  | 1.62E-01 | 3.90   | 14.76 | 7.92E-01 | 41.70  | 28.51 | 1.44E-01 |
| cg24850445 | 30.80  | 14.48 | 3.34E-02 | 4.47   | 19.61 | 8.20E-01 | 29.55   | 20.80  | 1.55E-01 | 19.95  | 11.01 | 6.99E-02 | 89.03  | 26.22 | 6.85E-04 |
| cg01822573 | -22.61 | 10.63 | 3.34E-02 | -46.79 | 27.71 | 9.13E-02 | -80.84  | 98.70  | 4.13E-01 | -16.06 | 12.11 | 1.85E-01 | -34.00 | 39.79 | 3.93E-01 |
| cg05753589 | 13.20  | 6.20  | 3.34E-02 | 12.48  | 12.14 | 3.04E-01 | -0.66   | 21.51  | 9.75E-01 | 14.52  | 8.97  | 1.05E-01 | 17.20  | 14.73 | 2.43E-01 |

|            |        |       |          |        |       |          |         |        |          |        |       |          |        |       |          |
|------------|--------|-------|----------|--------|-------|----------|---------|--------|----------|--------|-------|----------|--------|-------|----------|
| cg06342430 | -8.23  | 3.87  | 3.34E-02 | -3.00  | 9.43  | 7.51E-01 | -20.48  | 14.00  | 1.44E-01 | -7.51  | 4.77  | 1.15E-01 | -12.69 | 12.49 | 3.10E-01 |
| cg18042593 | -19.04 | 8.95  | 3.34E-02 | -22.47 | 19.57 | 2.51E-01 | -11.73  | 42.99  | 7.85E-01 | -11.72 | 7.99  | 1.42E-01 | -61.91 | 26.36 | 1.89E-02 |
| cg07742017 | -12.45 | 5.85  | 3.34E-02 | -25.70 | 14.31 | 7.25E-02 | -33.99  | 37.05  | 3.59E-01 | -7.85  | 7.03  | 2.64E-01 | -16.29 | 17.35 | 3.48E-01 |
| cg26764200 | 39.49  | 18.56 | 3.34E-02 | 62.92  | 21.35 | 3.21E-03 | -2.87   | 51.74  | 9.56E-01 | 62.38  | 54.68 | 2.54E-01 | -2.35  | 35.57 | 9.47E-01 |
| cg06057656 | 9.83   | 4.62  | 3.34E-02 | 10.68  | 7.12  | 1.34E-01 | 12.25   | 10.22  | 2.30E-01 | 6.81   | 10.50 | 5.17E-01 | 8.37   | 10.87 | 4.41E-01 |
| cg26711230 | -15.76 | 7.41  | 3.34E-02 | -28.92 | 13.03 | 2.65E-02 | -1.87   | 24.11  | 9.38E-01 | -9.88  | 11.30 | 3.82E-01 | -13.07 | 18.94 | 4.90E-01 |
| cg07667469 | -10.22 | 4.81  | 3.34E-02 | -13.97 | 10.03 | 1.63E-01 | -6.12   | 23.18  | 7.92E-01 | -10.87 | 6.18  | 7.83E-02 | -1.38  | 13.77 | 9.20E-01 |
| cg08340737 | 11.53  | 5.42  | 3.34E-02 | 20.85  | 9.97  | 3.64E-02 | -0.34   | 14.48  | 9.81E-01 | 15.76  | 11.63 | 1.75E-01 | 5.73   | 9.20  | 5.34E-01 |
| cg22576950 | -8.79  | 4.13  | 3.34E-02 | -10.20 | 8.26  | 2.17E-01 | -3.30   | 10.61  | 7.56E-01 | -8.45  | 6.67  | 2.05E-01 | -11.66 | 8.93  | 1.92E-01 |
| cg26740109 | -5.79  | 2.72  | 3.34E-02 | -7.21  | 4.92  | 1.42E-01 | -3.40   | 6.72   | 6.13E-01 | -6.19  | 4.22  | 1.42E-01 | -3.91  | 8.05  | 6.27E-01 |
| cg15827387 | 22.57  | 10.61 | 3.34E-02 | 52.22  | 29.18 | 7.35E-02 | 23.84   | 96.88  | 8.06E-01 | 20.94  | 11.94 | 7.94E-02 | -17.67 | 41.37 | 6.69E-01 |
| cg08239041 | 27.34  | 12.85 | 3.34E-02 | 15.91  | 20.12 | 4.29E-01 | 67.98   | 26.21  | 9.51E-03 | 11.01  | 9.43  | 2.43E-01 | 48.85  | 29.43 | 9.69E-02 |
| cg12325588 | -43.25 | 20.33 | 3.34E-02 | -76.93 | 66.17 | 2.45E-01 | -362.66 | 261.80 | 1.66E-01 | -36.48 | 22.42 | 1.04E-01 | -49.23 | 73.04 | 5.00E-01 |
| cg20760920 | -11.83 | 5.56  | 3.34E-02 | -24.04 | 9.78  | 1.39E-02 | -5.44   | 12.43  | 6.62E-01 | -4.76  | 11.20 | 6.71E-01 | -7.78  | 11.58 | 5.02E-01 |
| cg19702779 | 19.43  | 9.13  | 3.34E-02 | 24.27  | 10.90 | 2.60E-02 | 21.91   | 36.52  | 5.49E-01 | -28.22 | 49.69 | 5.70E-01 | 9.81   | 20.32 | 6.29E-01 |
| cg14909730 | 14.37  | 6.76  | 3.34E-02 | 26.19  | 11.43 | 2.20E-02 | -1.51   | 16.70  | 9.28E-01 | 3.42   | 10.77 | 7.51E-01 | 23.68  | 12.05 | 4.95E-02 |
| cg27241559 | -32.14 | 15.11 | 3.34E-02 | -71.76 | 38.50 | 6.24E-02 | -26.75  | 115.64 | 8.17E-01 | -22.02 | 17.48 | 2.08E-01 | -51.38 | 53.02 | 3.32E-01 |
| cg21789008 | -7.64  | 3.59  | 3.34E-02 | -13.39 | 4.98  | 7.23E-03 | -5.71   | 9.01   | 5.26E-01 | 4.80   | 16.97 | 7.77E-01 | -0.65  | 6.60  | 9.21E-01 |
| cg27116787 | 26.66  | 12.53 | 3.34E-02 | 38.90  | 45.19 | 3.89E-01 | -146.62 | 192.29 | 4.46E-01 | 26.16  | 13.57 | 5.39E-02 | 29.99  | 48.75 | 5.38E-01 |
| cg08670658 | 5.75   | 2.70  | 3.34E-02 | 4.24   | 3.33  | 2.03E-01 | 12.15   | 7.42   | 1.01E-01 | 8.01   | 8.99  | 3.73E-01 | 5.29   | 7.92  | 5.04E-01 |
| cg17827477 | -11.36 | 5.34  | 3.34E-02 | -9.60  | 7.92  | 2.25E-01 | -14.65  | 13.77  | 2.87E-01 | -17.16 | 15.66 | 2.73E-01 | -10.02 | 10.12 | 3.22E-01 |
| cg25140795 | 17.33  | 8.15  | 3.34E-02 | -1.45  | 16.78 | 9.31E-01 | 29.73   | 16.61  | 7.35E-02 | 22.10  | 12.56 | 7.85E-02 | 11.89  | 25.39 | 6.40E-01 |
| cg18321976 | 19.84  | 9.33  | 3.34E-02 | 32.57  | 19.03 | 8.70E-02 | 4.24    | 37.53  | 9.10E-01 | 22.41  | 13.77 | 1.04E-01 | 6.12   | 19.09 | 7.48E-01 |
| cg08792703 | 8.34   | 3.92  | 3.34E-02 | 11.93  | 5.58  | 3.26E-02 | 10.38   | 8.98   | 2.48E-01 | -2.72  | 10.36 | 7.93E-01 | 5.02   | 9.44  | 5.95E-01 |
| cg19582265 | 8.48   | 3.98  | 3.34E-02 | 14.11  | 7.81  | 7.06E-02 | 3.88    | 23.10  | 8.67E-01 | 7.14   | 5.10  | 1.61E-01 | 3.24   | 12.70 | 7.99E-01 |
| cg14604066 | -7.68  | 3.61  | 3.34E-02 | -9.39  | 4.91  | 5.56E-02 | 2.81    | 8.83   | 7.50E-01 | -8.13  | 10.19 | 4.25E-01 | -12.32 | 8.86  | 1.64E-01 |
| cg26298855 | -18.88 | 8.88  | 3.34E-02 | -15.79 | 16.09 | 3.26E-01 | -16.65  | 20.99  | 4.28E-01 | -15.21 | 15.03 | 3.12E-01 | -34.46 | 21.66 | 1.12E-01 |
| cg15917625 | 16.77  | 7.89  | 3.34E-02 | 17.87  | 11.88 | 1.33E-01 | 21.57   | 23.53  | 3.59E-01 | 21.76  | 20.01 | 2.77E-01 | 10.62  | 14.61 | 4.67E-01 |
| cg15632936 | -6.85  | 3.22  | 3.34E-02 | -7.17  | 4.66  | 1.24E-01 | -5.74   | 8.19   | 4.84E-01 | -10.96 | 9.14  | 2.31E-01 | -4.83  | 6.51  | 4.58E-01 |
| cg14197071 | 6.29   | 2.96  | 3.34E-02 | 4.38   | 4.53  | 3.33E-01 | 1.44    | 4.09   | 7.24E-01 | 9.94   | 4.52  | 2.77E-02 | 20.01  | 9.96  | 4.45E-02 |
| cg07660838 | 17.07  | 8.03  | 3.34E-02 | 19.64  | 11.71 | 9.35E-02 | 12.82   | 21.11  | 5.43E-01 | 9.60   | 20.29 | 6.36E-01 | 19.57  | 16.76 | 2.43E-01 |
| cg02383008 | -26.30 | 12.37 | 3.34E-02 | -20.76 | 14.61 | 1.55E-01 | -85.25  | 50.11  | 8.89E-02 | 57.39  | 75.48 | 4.47E-01 | -39.70 | 27.94 | 1.55E-01 |
| cg06819865 | 67.15  | 31.58 | 3.35E-02 | 112.58 | 47.82 | 1.86E-02 | -26.13  | 158.21 | 8.69E-01 | 60.61  | 67.50 | 3.69E-01 | 19.13  | 57.14 | 7.38E-01 |
| cg10989763 | 16.04  | 7.54  | 3.35E-02 | 27.58  | 12.53 | 2.78E-02 | 16.92   | 18.88  | 3.70E-01 | 30.22  | 25.98 | 2.45E-01 | 2.05   | 12.02 | 8.65E-01 |
| cg06696963 | 18.91  | 8.89  | 3.35E-02 | 13.73  | 16.46 | 4.04E-01 | 15.98   | 16.04  | 3.19E-01 | 16.65  | 19.01 | 3.81E-01 | 34.84  | 20.83 | 9.44E-02 |

|            |        |       |          |        |       |          |        |        |          |        |       |          |        |       |          |
|------------|--------|-------|----------|--------|-------|----------|--------|--------|----------|--------|-------|----------|--------|-------|----------|
| cg26271776 | -8.85  | 4.16  | 3.35E-02 | -15.15 | 6.61  | 2.20E-02 | -1.28  | 9.64   | 8.95E-01 | -11.63 | 8.85  | 1.89E-01 | -0.20  | 9.40  | 9.83E-01 |
| cg17739181 | 15.14  | 7.12  | 3.35E-02 | 14.91  | 19.14 | 4.36E-01 | 35.68  | 20.45  | 8.10E-02 | 10.93  | 8.60  | 2.04E-01 | 22.73  | 30.07 | 4.50E-01 |
| cg07675031 | 6.99   | 3.29  | 3.35E-02 | 9.47   | 4.23  | 2.51E-02 | 7.60   | 6.97   | 2.75E-01 | 5.29   | 13.43 | 6.93E-01 | -6.62  | 9.80  | 4.99E-01 |
| cg07262585 | 22.16  | 10.42 | 3.35E-02 | 17.85  | 24.03 | 4.58E-01 | 25.97  | 52.42  | 6.20E-01 | 16.13  | 12.73 | 2.05E-01 | 67.96  | 32.54 | 3.67E-02 |
| cg24206362 | 38.81  | 18.25 | 3.35E-02 | 61.49  | 36.37 | 9.09E-02 | -81.73 | 164.91 | 6.20E-01 | 29.99  | 23.30 | 1.98E-01 | 48.46  | 52.19 | 3.53E-01 |
| cg07532183 | 39.89  | 18.76 | 3.35E-02 | 42.75  | 23.52 | 6.91E-02 | 61.90  | 70.03  | 3.77E-01 | -5.49  | 61.19 | 9.29E-01 | 44.22  | 42.15 | 2.94E-01 |
| cg02585702 | 32.79  | 15.42 | 3.35E-02 | 53.14  | 21.61 | 1.39E-02 | -27.71 | 43.93  | 5.28E-01 | 61.40  | 34.63 | 7.62E-02 | 19.43  | 19.98 | 3.31E-01 |
| cg06271850 | 14.44  | 6.79  | 3.35E-02 | 22.06  | 10.29 | 3.20E-02 | 16.66  | 13.28  | 2.09E-01 | -13.98 | 20.18 | 4.89E-01 | 10.81  | 15.59 | 4.88E-01 |
| cg08962087 | 16.41  | 7.72  | 3.35E-02 | 22.01  | 10.31 | 3.28E-02 | 9.82   | 27.22  | 7.18E-01 | 15.56  | 21.46 | 4.69E-01 | 5.56   | 16.09 | 7.30E-01 |
| cg10640731 | 39.95  | 18.79 | 3.35E-02 | 36.30  | 26.39 | 1.69E-01 | 41.04  | 73.78  | 5.78E-01 | 88.47  | 72.64 | 2.23E-01 | 35.89  | 31.26 | 2.51E-01 |
| cg20369763 | 18.93  | 8.90  | 3.35E-02 | 38.95  | 19.89 | 5.01E-02 | -96.46 | 93.72  | 3.03E-01 | 17.57  | 10.92 | 1.08E-01 | 2.51   | 25.10 | 9.20E-01 |
| cg17640744 | 8.08   | 3.80  | 3.35E-02 | 8.50   | 5.00  | 8.92E-02 | 5.23   | 7.12   | 4.63E-01 | 29.50  | 13.13 | 2.46E-02 | 2.37   | 7.88  | 7.64E-01 |
| cg26512635 | -8.56  | 4.03  | 3.35E-02 | -14.02 | 10.17 | 1.68E-01 | -0.60  | 13.48  | 9.65E-01 | -6.10  | 4.95  | 2.17E-01 | -24.81 | 13.33 | 6.27E-02 |
| cg11185188 | 19.37  | 9.11  | 3.35E-02 | 22.68  | 19.25 | 2.39E-01 | 38.06  | 21.29  | 7.38E-02 | 7.65   | 13.14 | 5.60E-01 | 32.54  | 27.24 | 2.32E-01 |
| cg10933457 | -3.64  | 1.71  | 3.35E-02 | -7.03  | 4.42  | 1.11E-01 | -5.59  | 2.47   | 2.34E-02 | -6.11  | 11.81 | 6.05E-01 | -0.05  | 2.62  | 9.84E-01 |
| cg10629350 | -13.49 | 6.35  | 3.35E-02 | -16.04 | 12.38 | 1.95E-01 | -13.16 | 28.47  | 6.44E-01 | -14.57 | 8.23  | 7.69E-02 | 0.35   | 20.77 | 9.86E-01 |
| cg23190093 | 16.93  | 7.96  | 3.35E-02 | 38.32  | 19.66 | 5.12E-02 | 17.80  | 34.58  | 6.07E-01 | 9.76   | 9.43  | 3.01E-01 | 39.19  | 30.14 | 1.93E-01 |
| cg07851675 | 17.72  | 8.34  | 3.35E-02 | 13.77  | 10.11 | 1.73E-01 | 3.59   | 20.23  | 8.59E-01 | 49.30  | 17.64 | 5.18E-03 | 10.57  | 12.57 | 4.00E-01 |
| cg01956472 | 16.71  | 7.86  | 3.35E-02 | 16.33  | 15.35 | 2.87E-01 | -2.13  | 18.82  | 9.10E-01 | 26.65  | 11.74 | 2.32E-02 | 7.46   | 23.13 | 7.47E-01 |
| cg14662210 | -7.71  | 3.63  | 3.35E-02 | -9.73  | 7.34  | 1.85E-01 | -17.62 | 13.32  | 1.86E-01 | -3.11  | 4.94  | 5.29E-01 | -16.36 | 9.56  | 8.69E-02 |
| cg20083730 | -31.32 | 14.73 | 3.35E-02 | -39.89 | 23.85 | 9.45E-02 | -56.26 | 50.92  | 2.69E-01 | -7.64  | 27.02 | 7.77E-01 | -38.43 | 30.24 | 2.04E-01 |
| cg01153946 | -8.83  | 4.15  | 3.35E-02 | -8.16  | 7.23  | 2.59E-01 | -4.93  | 10.03  | 6.23E-01 | -11.61 | 7.94  | 1.43E-01 | -9.37  | 8.75  | 2.84E-01 |
| cg24039778 | 43.49  | 20.46 | 3.35E-02 | 42.54  | 26.85 | 1.13E-01 | 218.70 | 147.25 | 1.37E-01 | 72.86  | 73.80 | 3.23E-01 | 27.76  | 35.98 | 4.40E-01 |
| cg19577074 | -8.75  | 4.12  | 3.35E-02 | -11.89 | 7.51  | 1.13E-01 | -7.64  | 9.89   | 4.40E-01 | -2.94  | 7.30  | 6.87E-01 | -14.06 | 9.05  | 1.20E-01 |
| cg12600843 | -10.40 | 4.89  | 3.35E-02 | -13.98 | 9.45  | 1.39E-01 | 2.06   | 11.25  | 8.55E-01 | -13.27 | 8.22  | 1.07E-01 | -12.38 | 11.24 | 2.71E-01 |
| cg22310279 | 27.25  | 12.82 | 3.35E-02 | 15.93  | 20.49 | 4.37E-01 | -24.85 | 71.95  | 7.30E-01 | 41.80  | 19.29 | 3.02E-02 | 24.72  | 34.86 | 4.78E-01 |
| cg22462856 | 18.83  | 8.86  | 3.35E-02 | 7.75   | 21.37 | 7.17E-01 | 47.93  | 46.45  | 3.02E-01 | 20.01  | 10.37 | 5.36E-02 | 18.56  | 35.69 | 6.03E-01 |
| cg22008075 | 21.49  | 10.11 | 3.35E-02 | 29.94  | 21.93 | 1.72E-01 | 22.79  | 25.65  | 3.74E-01 | 9.51   | 13.68 | 4.87E-01 | 69.24  | 32.99 | 3.58E-02 |
| cg10045321 | 14.74  | 6.93  | 3.35E-02 | 16.24  | 17.40 | 3.51E-01 | 30.25  | 21.66  | 1.63E-01 | 14.35  | 8.79  | 1.02E-01 | 1.06   | 20.36 | 9.58E-01 |
| cg00045118 | -11.41 | 5.37  | 3.35E-02 | -14.65 | 7.89  | 6.33E-02 | 1.84   | 13.06  | 8.88E-01 | -16.06 | 13.19 | 2.23E-01 | -11.27 | 11.94 | 3.45E-01 |
| cg25984249 | 20.66  | 9.72  | 3.35E-02 | 26.66  | 16.89 | 1.15E-01 | 15.92  | 26.18  | 5.43E-01 | 2.04   | 17.37 | 9.06E-01 | 41.32  | 20.83 | 4.73E-02 |
| cg23141914 | -15.02 | 7.07  | 3.35E-02 | -38.35 | 19.73 | 5.19E-02 | -11.07 | 28.19  | 6.94E-01 | -12.75 | 8.27  | 1.23E-01 | -1.30  | 25.00 | 9.58E-01 |
| cg02539793 | 12.71  | 5.98  | 3.35E-02 | 16.02  | 8.01  | 4.56E-02 | 33.86  | 15.18  | 2.57E-02 | 9.27   | 11.75 | 4.30E-01 | 0.00   | 10.13 | 1.00E+00 |
| cg07100000 | 18.15  | 8.54  | 3.35E-02 | 17.51  | 12.32 | 1.55E-01 | 12.99  | 22.60  | 5.65E-01 | 53.18  | 28.75 | 6.44E-02 | 11.05  | 15.90 | 4.87E-01 |
| cg23424933 | 14.49  | 6.82  | 3.35E-02 | 3.78   | 12.66 | 7.65E-01 | 19.17  | 21.22  | 3.66E-01 | 18.99  | 10.39 | 6.78E-02 | 18.37  | 16.20 | 2.57E-01 |

|            |        |       |          |        |       |          |         |        |          |        |       |          |        |       |          |
|------------|--------|-------|----------|--------|-------|----------|---------|--------|----------|--------|-------|----------|--------|-------|----------|
| cg03355327 | 19.08  | 8.98  | 3.35E-02 | 32.49  | 18.78 | 8.37E-02 | -2.10   | 19.02  | 9.12E-01 | 16.87  | 13.57 | 2.14E-01 | 42.61  | 26.91 | 1.13E-01 |
| cg18087953 | -14.78 | 6.95  | 3.36E-02 | -24.41 | 8.47  | 3.95E-03 | 7.60    | 13.15  | 5.64E-01 | -17.56 | 15.28 | 2.50E-01 | -17.31 | 11.82 | 1.43E-01 |
| cg23852354 | -10.75 | 5.06  | 3.36E-02 | -11.05 | 9.24  | 2.32E-01 | -6.57   | 24.09  | 7.85E-01 | -14.01 | 6.94  | 4.35E-02 | 2.33   | 14.30 | 8.70E-01 |
| cg14783987 | 13.54  | 6.37  | 3.36E-02 | -5.78  | 17.66 | 7.44E-01 | 30.05   | 26.48  | 2.56E-01 | 16.19  | 7.34  | 2.75E-02 | 6.17   | 26.30 | 8.14E-01 |
| cg22286184 | -44.06 | 20.73 | 3.36E-02 | -47.36 | 25.17 | 5.99E-02 | 58.41   | 140.84 | 6.78E-01 | -45.87 | 75.64 | 5.44E-01 | -43.35 | 43.71 | 3.21E-01 |
| cg26110130 | -11.91 | 5.60  | 3.36E-02 | -6.57  | 8.33  | 4.31E-01 | -16.09  | 14.73  | 2.75E-01 | -25.75 | 19.13 | 1.78E-01 | -13.87 | 9.95  | 1.63E-01 |
| cg14064503 | -8.30  | 3.91  | 3.36E-02 | -7.64  | 5.93  | 1.98E-01 | -5.29   | 11.00  | 6.31E-01 | -18.85 | 8.57  | 2.79E-02 | -1.74  | 8.12  | 8.31E-01 |
| cg11688376 | -10.03 | 4.72  | 3.36E-02 | -5.92  | 5.92  | 3.18E-01 | 4.18    | 12.32  | 7.34E-01 | -11.71 | 8.35  | 1.61E-01 | -22.06 | 8.17  | 6.93E-03 |
| cg10959711 | 21.01  | 9.89  | 3.36E-02 | 26.02  | 20.45 | 2.03E-01 | 62.20   | 29.27  | 3.36E-02 | 10.69  | 13.62 | 4.33E-01 | 17.55  | 27.92 | 5.30E-01 |
| cg01690029 | -50.43 | 23.73 | 3.36E-02 | -81.76 | 66.22 | 2.17E-01 | -330.05 | 265.74 | 2.14E-01 | -36.81 | 27.61 | 1.82E-01 | -80.91 | 67.13 | 2.28E-01 |
| cg15526094 | -10.45 | 4.92  | 3.36E-02 | -12.23 | 7.77  | 1.16E-01 | -10.10  | 9.05   | 2.65E-01 | -6.87  | 12.27 | 5.75E-01 | -10.24 | 12.99 | 4.30E-01 |
| cg23280720 | -5.93  | 2.79  | 3.36E-02 | -4.84  | 3.64  | 1.83E-01 | -15.02  | 7.30   | 3.96E-02 | -4.31  | 8.56  | 6.14E-01 | -2.67  | 7.04  | 7.04E-01 |
| cg18109389 | -12.33 | 5.80  | 3.36E-02 | -14.37 | 14.74 | 3.30E-01 | -3.34   | 18.39  | 8.56E-01 | -14.08 | 7.15  | 4.89E-02 | -5.70  | 19.69 | 7.72E-01 |
| cg25364273 | 14.90  | 7.01  | 3.36E-02 | 11.56  | 10.75 | 2.82E-01 | 4.70    | 11.67  | 6.87E-01 | 20.19  | 14.48 | 1.63E-01 | 47.77  | 21.63 | 2.72E-02 |
| cg02322400 | 7.21   | 3.39  | 3.36E-02 | 7.15   | 5.20  | 1.69E-01 | 16.11   | 9.35   | 8.49E-02 | 3.64   | 6.49  | 5.76E-01 | 6.19   | 8.22  | 4.52E-01 |
| cg10750945 | -18.60 | 8.75  | 3.36E-02 | -9.39  | 21.65 | 6.64E-01 | 45.38   | 81.57  | 5.78E-01 | -18.91 | 10.00 | 5.88E-02 | -52.56 | 35.97 | 1.44E-01 |
| cg01759437 | 15.19  | 7.15  | 3.36E-02 | 12.78  | 18.68 | 4.94E-01 | -32.25  | 53.15  | 5.44E-01 | 17.67  | 8.31  | 3.35E-02 | 8.69   | 23.02 | 7.06E-01 |
| cg11697474 | 15.77  | 7.42  | 3.36E-02 | 7.57   | 12.97 | 5.60E-01 | 18.91   | 13.92  | 1.74E-01 | 5.61   | 16.16 | 7.28E-01 | 37.82  | 17.58 | 3.14E-02 |
| cg00373279 | -24.29 | 11.43 | 3.36E-02 | -25.48 | 13.96 | 6.79E-02 | -2.30   | 38.42  | 9.52E-01 | 21.67  | 71.55 | 7.62E-01 | -35.09 | 24.64 | 1.54E-01 |
| cg08691235 | 6.99   | 3.29  | 3.36E-02 | 5.11   | 4.37  | 2.42E-01 | 18.17   | 9.49   | 5.57E-02 | 8.92   | 8.41  | 2.89E-01 | 3.41   | 8.23  | 6.78E-01 |
| cg25779483 | 7.98   | 3.76  | 3.36E-02 | 9.74   | 5.35  | 6.88E-02 | 11.95   | 8.56   | 1.62E-01 | 8.90   | 12.77 | 4.86E-01 | 0.49   | 7.86  | 9.50E-01 |
| cg15015109 | 6.38   | 3.00  | 3.36E-02 | 4.67   | 3.69  | 2.06E-01 | 19.75   | 8.75   | 2.40E-02 | 7.27   | 9.88  | 4.61E-01 | 2.32   | 8.35  | 7.81E-01 |
| cg13787356 | 16.01  | 7.54  | 3.36E-02 | 16.14  | 21.04 | 4.43E-01 | 53.24   | 30.09  | 7.68E-02 | 13.02  | 8.74  | 1.36E-01 | 14.07  | 29.51 | 6.34E-01 |
| cg10332704 | 22.86  | 10.76 | 3.36E-02 | 20.51  | 18.26 | 2.61E-01 | 23.28   | 24.36  | 3.39E-01 | 16.03  | 18.90 | 3.96E-01 | 44.92  | 29.43 | 1.27E-01 |
| cg20475322 | 19.99  | 9.41  | 3.36E-02 | 28.45  | 14.60 | 5.13E-02 | 12.10   | 29.53  | 6.82E-01 | 38.54  | 35.87 | 2.83E-01 | 10.36  | 14.61 | 4.78E-01 |
| cg09891129 | 26.94  | 12.68 | 3.36E-02 | 54.12  | 41.37 | 1.91E-01 | 21.87   | 79.75  | 7.84E-01 | 18.30  | 15.05 | 2.24E-01 | 48.56  | 30.64 | 1.13E-01 |
| cg05545454 | -15.64 | 7.36  | 3.36E-02 | -11.08 | 15.18 | 4.66E-01 | 5.55    | 28.73  | 8.47E-01 | -20.21 | 9.76  | 3.83E-02 | -14.60 | 20.43 | 4.75E-01 |
| cg02202742 | 20.11  | 9.47  | 3.36E-02 | 4.92   | 12.67 | 6.98E-01 | 40.30   | 19.47  | 3.85E-02 | 8.06   | 28.06 | 7.74E-01 | 35.23  | 18.02 | 5.06E-02 |
| cg04445512 | 13.79  | 6.49  | 3.36E-02 | -2.80  | 15.63 | 8.58E-01 | 4.17    | 23.98  | 8.62E-01 | 20.02  | 8.09  | 1.33E-02 | 9.74   | 19.57 | 6.19E-01 |
| cg04077417 | -10.85 | 5.11  | 3.36E-02 | -12.58 | 10.62 | 2.36E-01 | -9.55   | 15.84  | 5.47E-01 | -5.49  | 7.22  | 4.47E-01 | -25.60 | 12.61 | 4.24E-02 |
| cg03550773 | 8.70   | 4.10  | 3.36E-02 | 4.38   | 5.47  | 4.24E-01 | 14.60   | 8.28   | 7.77E-02 | 21.24  | 15.20 | 1.62E-01 | 9.27   | 11.75 | 4.30E-01 |
| cg03629948 | 18.45  | 8.68  | 3.36E-02 | 32.69  | 15.04 | 2.98E-02 | -0.94   | 14.83  | 9.49E-01 | 30.76  | 20.80 | 1.39E-01 | 16.81  | 22.45 | 4.54E-01 |
| cg02560638 | -37.91 | 17.85 | 3.36E-02 | -41.47 | 19.82 | 3.64E-02 | 60.66   | 111.08 | 5.85E-01 | 2.47   | 85.04 | 9.77E-01 | -49.95 | 51.64 | 3.33E-01 |
| cg15068318 | 8.49   | 4.00  | 3.36E-02 | 8.79   | 5.19  | 9.02E-02 | 12.84   | 10.56  | 2.24E-01 | 14.48  | 11.70 | 2.16E-01 | -1.82  | 10.49 | 8.63E-01 |
| cg14597739 | -5.74  | 2.70  | 3.36E-02 | -4.21  | 3.43  | 2.20E-01 | -8.61   | 8.19   | 2.93E-01 | -15.14 | 10.33 | 1.43E-01 | -5.72  | 6.03  | 3.42E-01 |



|            |        |       |          |        |       |          |         |        |          |         |       |          |         |       |          |
|------------|--------|-------|----------|--------|-------|----------|---------|--------|----------|---------|-------|----------|---------|-------|----------|
| cg20676418 | -28.37 | 13.36 | 3.36E-02 | -29.02 | 16.81 | 8.42E-02 | -7.24   | 41.91  | 8.63E-01 | -18.63  | 49.77 | 7.08E-01 | -40.89  | 30.27 | 1.77E-01 |
| cg23521140 | -25.91 | 12.20 | 3.36E-02 | 8.99   | 36.25 | 8.04E-01 | -168.07 | 151.87 | 2.68E-01 | -28.91  | 13.37 | 3.06E-02 | -37.34  | 55.92 | 5.04E-01 |
| cg23606922 | 24.14  | 11.37 | 3.37E-02 | 27.01  | 29.65 | 3.62E-01 | 69.22   | 138.63 | 6.18E-01 | 27.37   | 13.05 | 3.59E-02 | -12.23  | 38.47 | 7.50E-01 |
| cg07841173 | 11.79  | 5.55  | 3.37E-02 | 17.27  | 8.13  | 3.37E-02 | 3.79    | 15.01  | 8.01E-01 | 18.20   | 13.58 | 1.80E-01 | 0.82    | 11.55 | 9.43E-01 |
| cg01803844 | -14.04 | 6.61  | 3.37E-02 | -12.41 | 13.02 | 3.41E-01 | -2.50   | 17.52  | 8.86E-01 | -15.31  | 9.94  | 1.23E-01 | -23.51  | 16.62 | 1.57E-01 |
| cg12494373 | 17.08  | 8.04  | 3.37E-02 | 16.76  | 18.84 | 3.74E-01 | 1.41    | 46.50  | 9.76E-01 | 18.74   | 9.74  | 5.44E-02 | 11.45   | 24.64 | 6.42E-01 |
| cg23951816 | -13.25 | 6.24  | 3.37E-02 | -24.28 | 18.02 | 1.78E-01 | -4.36   | 34.05  | 8.98E-01 | -13.27  | 7.05  | 5.99E-02 | 2.85    | 24.52 | 9.08E-01 |
| cg09172766 | -34.52 | 16.25 | 3.37E-02 | -39.46 | 45.45 | 3.85E-01 | 78.98   | 135.75 | 5.61E-01 | -35.99  | 18.92 | 5.71E-02 | -33.80  | 46.96 | 4.72E-01 |
| cg27490875 | -6.28  | 2.96  | 3.37E-02 | -8.24  | 5.17  | 1.11E-01 | -2.63   | 6.04   | 6.64E-01 | -8.89   | 5.70  | 1.19E-01 | -3.43   | 7.32  | 6.39E-01 |
| cg22040039 | 13.86  | 6.52  | 3.37E-02 | 12.23  | 9.07  | 1.78E-01 | 25.07   | 13.90  | 7.12E-02 | 1.29    | 19.23 | 9.46E-01 | 12.63   | 17.00 | 4.57E-01 |
| cg22344254 | -16.71 | 7.87  | 3.37E-02 | -28.54 | 13.90 | 4.01E-02 | -30.44  | 17.09  | 7.49E-02 | -2.84   | 14.60 | 8.46E-01 | -1.70   | 18.65 | 9.28E-01 |
| cg12940558 | 25.92  | 12.20 | 3.37E-02 | 60.46  | 31.45 | 5.46E-02 | -33.76  | 140.84 | 8.11E-01 | 20.65   | 14.04 | 1.41E-01 | 16.97   | 41.58 | 6.83E-01 |
| cg17315426 | 12.25  | 5.77  | 3.37E-02 | 7.09   | 7.10  | 3.18E-01 | 33.72   | 17.07  | 4.82E-02 | -0.12   | 24.84 | 9.96E-01 | 21.65   | 13.89 | 1.19E-01 |
| cg09773586 | 15.59  | 7.34  | 3.37E-02 | 22.95  | 8.86  | 9.61E-03 | -18.24  | 29.96  | 5.43E-01 | 19.41   | 38.62 | 6.15E-01 | 1.11    | 15.72 | 9.44E-01 |
| cg06019865 | -32.18 | 15.15 | 3.37E-02 | -36.88 | 18.37 | 4.47E-02 | -23.92  | 50.71  | 6.37E-01 | -27.05  | 57.20 | 6.36E-01 | -19.12  | 37.80 | 6.13E-01 |
| cg20809881 | 16.22  | 7.64  | 3.37E-02 | 22.66  | 11.05 | 4.03E-02 | 20.41   | 19.16  | 2.87E-01 | -12.36  | 30.09 | 6.81E-01 | 9.86    | 13.98 | 4.80E-01 |
| cg26982892 | -17.11 | 8.06  | 3.37E-02 | -21.59 | 20.16 | 2.84E-01 | -14.37  | 27.79  | 6.05E-01 | -16.70  | 9.88  | 9.11E-02 | -14.78  | 26.57 | 5.78E-01 |
| cg27557048 | 31.29  | 14.73 | 3.37E-02 | 37.92  | 17.62 | 3.14E-02 | -13.80  | 81.62  | 8.66E-01 | 38.54   | 66.06 | 5.60E-01 | 15.15   | 31.50 | 6.31E-01 |
| cg04336164 | 26.57  | 12.51 | 3.37E-02 | 30.68  | 24.38 | 2.08E-01 | 144.26  | 97.33  | 1.38E-01 | 19.95   | 15.89 | 2.09E-01 | 37.33   | 39.52 | 3.45E-01 |
| cg02086690 | -7.76  | 3.65  | 3.37E-02 | -11.72 | 7.44  | 1.15E-01 | -3.30   | 14.41  | 8.19E-01 | -5.79   | 4.95  | 2.42E-01 | -10.47  | 9.43  | 2.67E-01 |
| cg02674639 | -11.73 | 5.53  | 3.37E-02 | -20.19 | 8.84  | 2.24E-02 | -2.15   | 11.90  | 8.57E-01 | 0.43    | 14.52 | 9.76E-01 | -13.85  | 11.08 | 2.11E-01 |
| cg07991621 | 7.03   | 3.31  | 3.37E-02 | 7.66   | 4.33  | 7.68E-02 | 2.78    | 7.70   | 7.18E-01 | -10.15  | 13.03 | 4.36E-01 | 14.16   | 7.06  | 4.50E-02 |
| cg26015539 | -7.72  | 3.64  | 3.37E-02 | -3.82  | 7.55  | 6.13E-01 | -1.42   | 15.33  | 9.26E-01 | -10.01  | 4.64  | 3.08E-02 | -6.18   | 11.66 | 5.96E-01 |
| cg08325021 | 31.54  | 14.85 | 3.37E-02 | 50.06  | 40.37 | 2.15E-01 | -115.72 | 169.45 | 4.95E-01 | 33.53   | 16.78 | 4.56E-02 | -8.50   | 54.82 | 8.77E-01 |
| cg14704758 | 22.83  | 10.75 | 3.37E-02 | 51.51  | 17.64 | 3.50E-03 | 18.51   | 27.42  | 5.00E-01 | 6.95    | 11.39 | 5.42E-01 | 22.27   | 19.13 | 2.44E-01 |
| cg10885417 | 15.61  | 7.35  | 3.37E-02 | 0.42   | 19.60 | 9.83E-01 | 52.24   | 35.78  | 1.44E-01 | 16.34   | 8.53  | 5.55E-02 | 16.30   | 26.92 | 5.45E-01 |
| cg26891210 | 4.56   | 2.15  | 3.37E-02 | 2.93   | 3.08  | 3.42E-01 | 11.08   | 5.17   | 3.19E-02 | 1.85    | 4.26  | 6.64E-01 | 8.60    | 7.25  | 2.36E-01 |
| cg10164686 | -50.78 | 23.91 | 3.37E-02 | -63.44 | 32.58 | 5.15E-02 | -71.03  | 117.74 | 5.46E-01 | 33.11   | 55.34 | 5.50E-01 | -85.06  | 49.49 | 8.56E-02 |
| cg15084499 | 21.55  | 10.15 | 3.37E-02 | 1.99   | 28.58 | 9.45E-01 | -24.90  | 46.21  | 5.90E-01 | 28.30   | 11.84 | 1.68E-02 | 18.70   | 33.63 | 5.78E-01 |
| cg08503913 | -86.33 | 40.66 | 3.37E-02 | -69.67 | 47.92 | 1.46E-01 | 194.33  | 187.86 | 3.01E-01 | -170.97 | 65.04 | 8.57E-03 | -71.77  | 64.99 | 2.69E-01 |
| cg00405060 | -38.22 | 18.00 | 3.37E-02 | -58.93 | 23.10 | 1.07E-02 | 50.31   | 86.88  | 5.63E-01 | -46.06  | 60.01 | 4.43E-01 | -1.72   | 35.31 | 9.61E-01 |
| cg03585912 | 11.85  | 5.58  | 3.37E-02 | 11.73  | 10.30 | 2.55E-01 | 8.18    | 13.65  | 5.49E-01 | 20.80   | 10.77 | 5.34E-02 | 5.38    | 10.71 | 6.16E-01 |
| cg14819229 | -12.51 | 5.89  | 3.37E-02 | -11.23 | 11.39 | 3.24E-01 | -21.29  | 13.94  | 1.27E-01 | -13.12  | 8.78  | 1.35E-01 | 2.05    | 18.37 | 9.11E-01 |
| cg02847384 | -51.63 | 24.32 | 3.37E-02 | -22.13 | 23.45 | 3.45E-01 | -115.56 | 85.48  | 1.76E-01 | -64.27  | 65.06 | 3.23E-01 | -115.87 | 53.40 | 3.00E-02 |
| cg07414984 | 19.73  | 9.29  | 3.37E-02 | 20.78  | 30.09 | 4.90E-01 | -9.08   | 138.53 | 9.48E-01 | 18.43   | 10.12 | 6.84E-02 | 39.61   | 39.09 | 3.11E-01 |

|            |        |       |          |        |       |          |        |        |          |        |       |          |        |       |          |
|------------|--------|-------|----------|--------|-------|----------|--------|--------|----------|--------|-------|----------|--------|-------|----------|
| cg23957643 | 13.78  | 6.49  | 3.37E-02 | 10.13  | 10.44 | 3.32E-01 | 28.53  | 13.69  | 3.72E-02 | 3.98   | 16.03 | 8.04E-01 | 12.46  | 13.70 | 3.63E-01 |
| cg14308647 | -10.30 | 4.85  | 3.37E-02 | -0.34  | 10.50 | 9.75E-01 | -32.77 | 21.51  | 1.28E-01 | -10.50 | 6.51  | 1.07E-01 | -15.13 | 11.40 | 1.85E-01 |
| cg17627427 | 17.85  | 8.41  | 3.37E-02 | -5.12  | 19.38 | 7.92E-01 | 33.37  | 42.33  | 4.30E-01 | 23.76  | 10.06 | 1.82E-02 | 12.30  | 30.74 | 6.89E-01 |
| cg12583659 | 25.22  | 11.88 | 3.37E-02 | 20.30  | 43.05 | 6.37E-01 | 48.43  | 180.62 | 7.89E-01 | 26.50  | 12.66 | 3.64E-02 | 3.77   | 59.47 | 9.50E-01 |
| cg27539233 | 8.69   | 4.09  | 3.37E-02 | 6.22   | 6.27  | 3.21E-01 | 12.59  | 8.41   | 1.35E-01 | 13.74  | 8.84  | 1.20E-01 | 0.94   | 11.69 | 9.36E-01 |
| cg19591908 | -7.47  | 3.52  | 3.37E-02 | -12.89 | 6.64  | 5.22E-02 | 0.55   | 7.78   | 9.43E-01 | -9.25  | 5.56  | 9.62E-02 | -2.30  | 10.35 | 8.24E-01 |
| cg19479086 | -7.85  | 3.70  | 3.38E-02 | -0.29  | 7.92  | 9.71E-01 | -14.49 | 16.61  | 3.83E-01 | -11.11 | 4.63  | 1.64E-02 | 0.20   | 12.01 | 9.87E-01 |
| cg23676829 | 14.67  | 6.91  | 3.38E-02 | 4.72   | 14.67 | 7.48E-01 | 2.80   | 28.00  | 9.20E-01 | 16.97  | 8.77  | 5.30E-02 | 30.28  | 22.27 | 1.74E-01 |
| cg17194668 | 14.89  | 7.01  | 3.38E-02 | 25.04  | 15.11 | 9.76E-02 | 29.38  | 18.87  | 1.19E-01 | 9.51   | 9.45  | 3.14E-01 | 2.08   | 22.69 | 9.27E-01 |
| cg02980000 | 40.76  | 19.20 | 3.38E-02 | 8.14   | 24.46 | 7.39E-01 | 81.94  | 89.42  | 3.59E-01 | 65.03  | 61.99 | 2.94E-01 | 71.72  | 28.50 | 1.18E-02 |
| cg00259046 | 5.88   | 2.77  | 3.38E-02 | 2.61   | 4.04  | 5.19E-01 | 7.84   | 5.59   | 1.60E-01 | 19.16  | 9.70  | 4.81E-02 | 5.74   | 6.15  | 3.51E-01 |
| cg07185695 | 21.40  | 10.08 | 3.38E-02 | 29.55  | 15.68 | 5.94E-02 | 49.66  | 27.27  | 6.86E-02 | 11.35  | 32.62 | 7.28E-01 | 3.69   | 16.94 | 8.28E-01 |
| cg26985203 | 6.20   | 2.92  | 3.38E-02 | 9.18   | 3.97  | 2.08E-02 | 7.43   | 6.35   | 2.42E-01 | 10.53  | 8.22  | 2.00E-01 | -2.70  | 5.73  | 6.37E-01 |
| cg02458062 | -13.31 | 6.27  | 3.38E-02 | -3.56  | 19.44 | 8.55E-01 | 8.91   | 26.90  | 7.41E-01 | -15.60 | 7.06  | 2.71E-02 | -21.27 | 27.47 | 4.39E-01 |
| cg17882959 | -31.35 | 14.77 | 3.38E-02 | 9.13   | 34.71 | 7.92E-01 | -93.48 | 155.46 | 5.48E-01 | -42.49 | 17.47 | 1.50E-02 | -18.90 | 47.88 | 6.93E-01 |
| cg00345025 | -12.02 | 5.66  | 3.38E-02 | -9.15  | 7.69  | 2.35E-01 | -24.95 | 13.32  | 6.10E-02 | 11.65  | 21.60 | 5.90E-01 | -16.08 | 12.39 | 1.95E-01 |
| cg27211284 | 11.28  | 5.31  | 3.38E-02 | 12.21  | 8.38  | 1.45E-01 | -5.72  | 15.38  | 7.10E-01 | 13.66  | 9.92  | 1.68E-01 | 16.33  | 12.13 | 1.78E-01 |
| cg21400296 | -7.86  | 3.70  | 3.38E-02 | -13.10 | 8.79  | 1.36E-01 | 1.35   | 13.59  | 9.21E-01 | -5.80  | 4.59  | 2.06E-01 | -19.19 | 11.90 | 1.07E-01 |
| cg03517913 | -11.30 | 5.32  | 3.38E-02 | -15.86 | 13.37 | 2.35E-01 | 15.19  | 19.85  | 4.44E-01 | -11.93 | 6.53  | 6.76E-02 | -18.51 | 16.42 | 2.60E-01 |
| cg14076258 | -8.11  | 3.82  | 3.38E-02 | -6.36  | 6.58  | 3.34E-01 | 2.74   | 11.47  | 8.11E-01 | -10.20 | 6.04  | 9.13E-02 | -14.53 | 9.86  | 1.41E-01 |
| cg17171407 | 8.44   | 3.98  | 3.38E-02 | 6.80   | 5.21  | 1.92E-01 | 6.91   | 9.40   | 4.62E-01 | 36.49  | 22.86 | 1.10E-01 | 10.31  | 8.73  | 2.38E-01 |
| cg02032282 | -13.31 | 6.27  | 3.38E-02 | -22.80 | 10.92 | 3.68E-02 | -6.17  | 14.65  | 6.73E-01 | -3.66  | 14.50 | 8.01E-01 | -13.25 | 11.44 | 2.47E-01 |
| cg06676088 | 14.24  | 6.71  | 3.38E-02 | 8.64   | 15.09 | 5.67E-01 | 7.53   | 18.22  | 6.79E-01 | 18.39  | 8.75  | 3.56E-02 | 8.89   | 23.92 | 7.10E-01 |
| cg11996390 | 17.93  | 8.44  | 3.38E-02 | 14.98  | 22.67 | 5.09E-01 | -25.21 | 43.53  | 5.63E-01 | 17.83  | 9.80  | 6.88E-02 | 43.94  | 29.70 | 1.39E-01 |
| cg25391820 | 15.14  | 7.13  | 3.38E-02 | 14.97  | 10.90 | 1.70E-01 | 22.93  | 16.71  | 1.70E-01 | 30.62  | 19.13 | 1.10E-01 | 1.19   | 14.24 | 9.33E-01 |
| cg10582639 | 18.50  | 8.72  | 3.38E-02 | 18.11  | 12.39 | 1.44E-01 | -6.18  | 18.96  | 7.45E-01 | 15.07  | 11.87 | 2.04E-01 | 45.65  | 17.05 | 7.40E-03 |
| cg20315445 | 10.91  | 5.14  | 3.38E-02 | 10.97  | 9.95  | 2.70E-01 | -1.97  | 12.73  | 8.77E-01 | 11.18  | 7.56  | 1.39E-01 | 28.94  | 15.61 | 6.38E-02 |
| cg22763649 | 10.97  | 5.17  | 3.38E-02 | 16.08  | 7.59  | 3.42E-02 | 7.53   | 13.74  | 5.83E-01 | 11.04  | 12.85 | 3.90E-01 | 2.86   | 10.70 | 7.89E-01 |
| cg12510999 | 9.56   | 4.51  | 3.38E-02 | 10.96  | 9.11  | 2.29E-01 | 23.90  | 13.87  | 8.49E-02 | 6.89   | 6.00  | 2.51E-01 | 5.54   | 15.33 | 7.18E-01 |
| cg02499768 | -10.21 | 4.81  | 3.38E-02 | -15.17 | 6.50  | 1.97E-02 | -11.16 | 11.36  | 3.26E-01 | 16.87  | 28.76 | 5.57E-01 | -1.56  | 9.70  | 8.72E-01 |
| cg04772947 | -10.28 | 4.84  | 3.38E-02 | -24.83 | 10.59 | 1.91E-02 | -5.72  | 15.47  | 7.11E-01 | -8.29  | 6.54  | 2.04E-01 | 0.21   | 12.79 | 9.87E-01 |
| cg22387323 | 9.22   | 4.35  | 3.38E-02 | 6.89   | 5.44  | 2.05E-01 | 24.22  | 9.82   | 1.37E-02 | -0.30  | 12.72 | 9.81E-01 | 6.17   | 11.40 | 5.89E-01 |
| cg15706657 | 9.40   | 4.43  | 3.38E-02 | 4.94   | 6.12  | 4.19E-01 | 18.95  | 8.67   | 2.89E-02 | 2.82   | 15.57 | 8.56E-01 | 12.28  | 12.13 | 3.11E-01 |
| cg05106699 | -10.99 | 5.18  | 3.38E-02 | -19.13 | 11.88 | 1.07E-01 | 9.16   | 23.43  | 6.96E-01 | -7.92  | 6.66  | 2.35E-01 | -19.30 | 13.11 | 1.41E-01 |
| cg07414239 | -30.71 | 14.47 | 3.38E-02 | -18.84 | 44.68 | 6.73E-01 | 80.49  | 167.06 | 6.30E-01 | -35.86 | 15.99 | 2.49E-02 | 0.72   | 55.50 | 9.90E-01 |

|            |        |       |          |        |       |          |         |        |          |        |       |          |        |       |          |
|------------|--------|-------|----------|--------|-------|----------|---------|--------|----------|--------|-------|----------|--------|-------|----------|
| cg10135708 | 13.91  | 6.55  | 3.38E-02 | 5.25   | 14.56 | 7.18E-01 | 9.85    | 16.16  | 5.42E-01 | 18.62  | 8.85  | 3.54E-02 | 12.01  | 22.64 | 5.96E-01 |
| cg11328875 | -51.75 | 24.39 | 3.38E-02 | -51.12 | 28.21 | 6.99E-02 | -19.24  | 183.07 | 9.16E-01 | 46.22  | 92.17 | 6.16E-01 | -99.84 | 60.12 | 9.68E-02 |
| cg17752015 | -18.67 | 8.80  | 3.38E-02 | -24.54 | 26.43 | 3.53E-01 | 6.00    | 108.05 | 9.56E-01 | -20.32 | 9.71  | 3.63E-02 | 11.66  | 35.72 | 7.44E-01 |
| cg13996155 | 21.18  | 9.98  | 3.38E-02 | 44.29  | 33.58 | 1.87E-01 | 58.20   | 48.42  | 2.29E-01 | 21.27  | 12.06 | 7.78E-02 | 1.22   | 23.25 | 9.58E-01 |
| cg03421440 | -7.22  | 3.40  | 3.38E-02 | -10.82 | 4.92  | 2.79E-02 | -6.22   | 8.82   | 4.81E-01 | 3.22   | 9.62  | 7.38E-01 | -6.14  | 6.83  | 3.69E-01 |
| cg02495767 | 15.46  | 7.29  | 3.39E-02 | 15.04  | 18.20 | 4.09E-01 | 25.30   | 38.55  | 5.12E-01 | 12.54  | 8.55  | 1.42E-01 | 39.14  | 26.16 | 1.35E-01 |
| cg24107988 | -32.45 | 15.29 | 3.39E-02 | -5.84  | 27.84 | 8.34E-01 | -75.19  | 167.51 | 6.54E-01 | -43.44 | 19.79 | 2.81E-02 | -44.36 | 50.27 | 3.78E-01 |
| cg09357934 | 5.79   | 2.73  | 3.39E-02 | 6.58   | 3.88  | 8.95E-02 | 9.49    | 6.82   | 1.64E-01 | 1.49   | 7.77  | 8.48E-01 | 3.72   | 5.79  | 5.21E-01 |
| cg11923631 | 8.19   | 3.86  | 3.39E-02 | 7.10   | 5.24  | 1.76E-01 | 7.98    | 11.39  | 4.84E-01 | 4.56   | 9.41  | 6.28E-01 | 15.19  | 9.23  | 9.97E-02 |
| cg26216243 | -7.91  | 3.73  | 3.39E-02 | -10.93 | 6.73  | 1.04E-01 | -16.49  | 10.79  | 1.26E-01 | -3.84  | 5.63  | 4.95E-01 | -6.69  | 10.18 | 5.11E-01 |
| cg04586126 | 5.73   | 2.70  | 3.39E-02 | 6.40   | 3.48  | 6.56E-02 | 10.47   | 6.45   | 1.04E-01 | 3.86   | 8.11  | 6.34E-01 | -3.58  | 8.10  | 6.59E-01 |
| cg21697512 | 6.12   | 2.88  | 3.39E-02 | 6.11   | 3.88  | 1.15E-01 | 8.42    | 7.52   | 2.63E-01 | 9.99   | 7.28  | 1.70E-01 | -0.46  | 7.62  | 9.52E-01 |
| cg13568334 | -39.57 | 18.65 | 3.39E-02 | -52.64 | 22.84 | 2.12E-02 | -130.29 | 108.33 | 2.29E-01 | 14.44  | 59.26 | 8.07E-01 | -9.98  | 41.25 | 8.09E-01 |
| cg22694191 | 12.22  | 5.76  | 3.39E-02 | 11.35  | 9.99  | 2.56E-01 | 28.53   | 14.87  | 5.49E-02 | 4.11   | 10.71 | 7.01E-01 | 13.04  | 12.07 | 2.80E-01 |
| cg02604290 | 20.86  | 9.83  | 3.39E-02 | 19.18  | 13.93 | 1.69E-01 | 2.97    | 29.66  | 9.20E-01 | 37.83  | 26.99 | 1.61E-01 | 22.99  | 19.32 | 2.34E-01 |
| cg20686347 | 37.53  | 17.69 | 3.39E-02 | 42.86  | 24.19 | 7.64E-02 | 27.31   | 48.82  | 5.76E-01 | 19.37  | 53.05 | 7.15E-01 | 39.81  | 37.48 | 2.88E-01 |
| cg00208504 | 16.68  | 7.86  | 3.39E-02 | 18.40  | 11.36 | 1.05E-01 | 41.43   | 25.73  | 1.07E-01 | 25.85  | 22.09 | 2.42E-01 | 2.41   | 14.32 | 8.67E-01 |
| cg05320607 | -45.87 | 21.62 | 3.39E-02 | -48.38 | 26.58 | 6.88E-02 | -86.80  | 105.31 | 4.10E-01 | -31.21 | 78.13 | 6.90E-01 | -35.55 | 46.11 | 4.41E-01 |
| cg09133192 | 48.55  | 22.89 | 3.39E-02 | 50.07  | 30.89 | 1.05E-01 | 87.56   | 111.45 | 4.32E-01 | 73.64  | 50.06 | 1.41E-01 | 9.87   | 51.21 | 8.47E-01 |
| cg01763709 | 18.31  | 8.63  | 3.39E-02 | 12.83  | 19.88 | 5.19E-01 | -11.38  | 48.42  | 8.14E-01 | 19.43  | 10.41 | 6.21E-02 | 31.36  | 28.36 | 2.69E-01 |
| cg11606261 | 6.49   | 3.06  | 3.39E-02 | 3.66   | 3.16  | 2.47E-01 | 12.42   | 6.76   | 6.61E-02 | 16.04  | 7.63  | 3.55E-02 | 0.88   | 7.06  | 9.01E-01 |
| cg26375660 | -16.25 | 7.66  | 3.39E-02 | -10.33 | 16.04 | 5.20E-01 | -26.44  | 29.63  | 3.72E-01 | -20.32 | 9.88  | 3.97E-02 | 0.79   | 23.69 | 9.73E-01 |
| cg02458483 | 17.38  | 8.19  | 3.39E-02 | 0.02   | 9.99  | 9.98E-01 | 29.98   | 11.76  | 1.08E-02 | 14.85  | 16.13 | 3.57E-01 | 30.22  | 14.70 | 3.97E-02 |
| cg11311280 | -8.65  | 4.08  | 3.39E-02 | -21.05 | 9.29  | 2.35E-02 | 8.02    | 22.31  | 7.19E-01 | -6.22  | 5.08  | 2.21E-01 | -6.59  | 11.36 | 5.62E-01 |
| cg07698804 | -7.14  | 3.37  | 3.39E-02 | -4.69  | 4.50  | 2.98E-01 | -17.68  | 10.05  | 7.84E-02 | -14.58 | 10.74 | 1.74E-01 | -4.79  | 7.02  | 4.95E-01 |
| cg04615850 | 19.43  | 9.16  | 3.39E-02 | 14.70  | 19.54 | 4.52E-01 | 30.71   | 17.42  | 7.80E-02 | 9.94   | 15.21 | 5.13E-01 | 29.14  | 24.42 | 2.33E-01 |
| cg05939647 | 16.44  | 7.75  | 3.39E-02 | 10.82  | 15.61 | 4.88E-01 | 2.87    | 22.01  | 8.96E-01 | 18.25  | 10.51 | 8.23E-02 | 40.99  | 26.61 | 1.23E-01 |
| cg05348321 | 16.79  | 7.92  | 3.39E-02 | 14.56  | 15.76 | 3.55E-01 | 13.88   | 15.61  | 3.74E-01 | 11.20  | 12.59 | 3.73E-01 | 53.78  | 25.67 | 3.61E-02 |
| cg12385165 | -8.53  | 4.02  | 3.39E-02 | -5.69  | 5.88  | 3.33E-01 | -18.98  | 9.24   | 3.99E-02 | -6.41  | 11.82 | 5.88E-01 | -6.74  | 8.45  | 4.25E-01 |
| cg26476156 | -8.79  | 4.14  | 3.39E-02 | -5.06  | 8.18  | 5.36E-01 | -14.36  | 14.57  | 3.25E-01 | -9.29  | 5.59  | 9.62E-02 | -10.83 | 12.36 | 3.81E-01 |
| cg02839351 | 10.27  | 4.84  | 3.39E-02 | 5.04   | 6.21  | 4.17E-01 | 25.05   | 11.33  | 2.71E-02 | 9.61   | 17.80 | 5.89E-01 | 14.16  | 13.15 | 2.82E-01 |
| cg25307641 | 15.13  | 7.14  | 3.39E-02 | 4.57   | 12.04 | 7.04E-01 | 22.01   | 12.73  | 8.39E-02 | 20.16  | 16.97 | 2.35E-01 | 19.33  | 17.96 | 2.82E-01 |
| cg17566936 | 49.00  | 23.10 | 3.39E-02 | 55.89  | 19.30 | 3.78E-03 | -46.56  | 80.35  | 5.62E-01 | 115.55 | 50.29 | 2.16E-02 | 10.19  | 44.94 | 8.21E-01 |
| cg00446046 | 4.63   | 2.18  | 3.39E-02 | 3.13   | 3.18  | 3.26E-01 | 9.85    | 4.66   | 3.43E-02 | 1.85   | 4.64  | 6.90E-01 | 6.63   | 7.36  | 3.68E-01 |
| cg09540102 | -5.27  | 2.48  | 3.39E-02 | -5.17  | 3.35  | 1.23E-01 | -3.69   | 6.30   | 5.58E-01 | -11.44 | 7.47  | 1.25E-01 | -3.18  | 5.82  | 5.85E-01 |

|            |        |       |          |        |       |          |         |        |          |        |       |          |        |       |          |
|------------|--------|-------|----------|--------|-------|----------|---------|--------|----------|--------|-------|----------|--------|-------|----------|
| cg21788624 | -14.41 | 6.80  | 3.39E-02 | -12.35 | 20.21 | 5.41E-01 | -3.16   | 53.45  | 9.53E-01 | -14.50 | 7.65  | 5.81E-02 | -18.68 | 23.77 | 4.32E-01 |
| cg17537935 | -13.71 | 6.46  | 3.39E-02 | -20.14 | 11.65 | 8.39E-02 | -0.01   | 14.33  | 1.00E+00 | -13.27 | 12.56 | 2.91E-01 | -17.82 | 13.66 | 1.92E-01 |
| cg23497644 | -6.95  | 3.28  | 3.39E-02 | -8.88  | 5.65  | 1.16E-01 | -1.06   | 7.93   | 8.94E-01 | -12.27 | 5.93  | 3.87E-02 | -0.24  | 7.54  | 9.74E-01 |
| cg06251978 | -7.50  | 3.54  | 3.39E-02 | -1.55  | 5.07  | 7.60E-01 | -10.28  | 8.69   | 2.37E-01 | -14.15 | 8.74  | 1.05E-01 | -14.83 | 8.25  | 7.21E-02 |
| cg02162286 | 11.24  | 5.30  | 3.39E-02 | 12.98  | 8.64  | 1.33E-01 | 0.83    | 13.55  | 9.51E-01 | 9.47   | 11.21 | 3.98E-01 | 16.66  | 10.67 | 1.19E-01 |
| cg03402794 | -34.98 | 16.50 | 3.39E-02 | -29.72 | 20.89 | 1.55E-01 | -32.85  | 74.57  | 6.60E-01 | -65.99 | 80.25 | 4.11E-01 | -42.25 | 30.87 | 1.71E-01 |
| cg16083044 | -7.45  | 3.51  | 3.40E-02 | -11.00 | 4.60  | 1.68E-02 | -2.21   | 8.14   | 7.86E-01 | -7.94  | 14.80 | 5.91E-01 | -1.03  | 8.40  | 9.02E-01 |
| cg09225861 | 6.65   | 3.14  | 3.40E-02 | 7.67   | 4.26  | 7.15E-02 | 6.39    | 6.34   | 3.14E-01 | -2.80  | 14.33 | 8.45E-01 | 6.44   | 7.74  | 4.06E-01 |
| cg26287741 | 18.98  | 8.95  | 3.40E-02 | 4.73   | 16.33 | 7.72E-01 | 15.19   | 17.69  | 3.91E-01 | 24.61  | 18.50 | 1.83E-01 | 37.73  | 19.55 | 5.36E-02 |
| cg26001287 | 12.82  | 6.05  | 3.40E-02 | 14.77  | 7.29  | 4.27E-02 | 35.91   | 23.72  | 1.30E-01 | 7.32   | 21.95 | 7.39E-01 | -1.34  | 14.61 | 9.27E-01 |
| cg24642439 | -25.64 | 12.09 | 3.40E-02 | -54.94 | 43.26 | 2.04E-01 | -245.77 | 164.43 | 1.35E-01 | -23.70 | 13.18 | 7.22E-02 | -1.05  | 44.10 | 9.81E-01 |
| cg02449166 | 15.51  | 7.31  | 3.40E-02 | 12.94  | 10.42 | 2.14E-01 | 24.14   | 16.82  | 1.51E-01 | 4.56   | 23.31 | 8.45E-01 | 18.74  | 15.60 | 2.30E-01 |
| cg22019177 | 29.91  | 14.11 | 3.40E-02 | 28.62  | 18.77 | 1.27E-01 | 7.10    | 56.48  | 9.00E-01 | 34.41  | 37.26 | 3.56E-01 | 36.50  | 29.47 | 2.16E-01 |
| cg20985067 | -11.81 | 5.57  | 3.40E-02 | 2.91   | 13.17 | 8.25E-01 | -11.66  | 16.23  | 4.73E-01 | -18.32 | 7.20  | 1.10E-02 | -0.07  | 17.09 | 9.97E-01 |
| cg05304393 | 8.89   | 4.19  | 3.40E-02 | 11.58  | 6.28  | 6.52E-02 | 8.80    | 8.96   | 3.26E-01 | -9.38  | 13.43 | 4.85E-01 | 11.45  | 8.61  | 1.84E-01 |
| cg04520793 | -11.81 | 5.57  | 3.40E-02 | -8.59  | 7.42  | 2.47E-01 | 3.63    | 14.01  | 7.96E-01 | -12.92 | 10.20 | 2.05E-01 | -29.41 | 12.11 | 1.52E-02 |
| cg15498134 | -6.59  | 3.11  | 3.40E-02 | -8.74  | 4.40  | 4.68E-02 | -6.65   | 7.53   | 3.77E-01 | -9.85  | 11.29 | 3.83E-01 | -1.36  | 6.15  | 8.25E-01 |
| cg10082354 | -9.45  | 4.46  | 3.40E-02 | -14.83 | 9.90  | 1.34E-01 | -4.27   | 12.20  | 7.26E-01 | -7.91  | 6.15  | 1.98E-01 | -12.48 | 12.04 | 3.00E-01 |
| cg22791453 | 9.88   | 4.66  | 3.40E-02 | 14.85  | 7.29  | 4.17E-02 | -1.35   | 10.34  | 8.96E-01 | 17.28  | 11.53 | 1.34E-01 | 5.63   | 9.82  | 5.67E-01 |
| cg13700250 | -7.13  | 3.36  | 3.40E-02 | -11.45 | 7.21  | 1.12E-01 | 3.80    | 10.93  | 7.28E-01 | -7.26  | 4.55  | 1.10E-01 | -7.24  | 8.90  | 4.16E-01 |
| cg23265210 | -9.98  | 4.71  | 3.40E-02 | -24.45 | 8.35  | 3.41E-03 | -5.11   | 11.23  | 6.49E-01 | -5.38  | 4.75  | 2.58E-01 | -6.70  | 10.37 | 5.18E-01 |
| cg10624161 | 24.23  | 11.43 | 3.40E-02 | 19.23  | 17.46 | 2.71E-01 | -3.64   | 30.27  | 9.04E-01 | 18.11  | 15.13 | 2.31E-01 | 64.69  | 24.47 | 8.19E-03 |
| cg15083158 | 40.52  | 19.11 | 3.40E-02 | 100.30 | 50.92 | 4.89E-02 | 39.30   | 246.72 | 8.73E-01 | 36.73  | 21.66 | 9.00E-02 | -32.52 | 69.86 | 6.42E-01 |
| cg16696043 | 21.86  | 10.31 | 3.40E-02 | 4.09   | 13.83 | 7.67E-01 | 27.69   | 16.28  | 8.91E-02 | 13.28  | 18.55 | 4.74E-01 | 54.06  | 20.57 | 8.58E-03 |
| cg24157814 | -12.80 | 6.04  | 3.40E-02 | -22.36 | 10.81 | 3.87E-02 | -0.52   | 14.42  | 9.71E-01 | -9.54  | 10.23 | 3.51E-01 | -14.69 | 14.90 | 3.24E-01 |
| cg02092807 | 22.10  | 10.42 | 3.40E-02 | -1.71  | 19.39 | 9.30E-01 | 40.01   | 22.24  | 7.20E-02 | 18.72  | 15.46 | 2.26E-01 | 50.23  | 27.23 | 6.51E-02 |
| cg17448192 | -5.18  | 2.44  | 3.40E-02 | -4.67  | 3.51  | 1.83E-01 | -3.09   | 5.46   | 5.72E-01 | -9.33  | 6.50  | 1.51E-01 | -5.64  | 5.90  | 3.38E-01 |
| cg26461695 | 16.83  | 7.94  | 3.40E-02 | 33.03  | 13.51 | 1.45E-02 | 6.17    | 20.48  | 7.63E-01 | 24.24  | 19.23 | 2.07E-01 | 2.29   | 13.21 | 8.63E-01 |
| cg26413691 | -9.78  | 4.61  | 3.40E-02 | -11.90 | 6.55  | 6.92E-02 | -12.19  | 11.38  | 2.84E-01 | 2.77   | 11.12 | 8.03E-01 | -14.00 | 11.25 | 2.13E-01 |
| cg10625096 | -10.74 | 5.07  | 3.40E-02 | -11.84 | 11.32 | 2.95E-01 | -9.27   | 20.28  | 6.48E-01 | -12.11 | 6.35  | 5.64E-02 | -0.69  | 16.06 | 9.66E-01 |
| cg22711218 | 20.59  | 9.71  | 3.40E-02 | 23.98  | 23.02 | 2.98E-01 | 61.76   | 43.23  | 1.53E-01 | 11.92  | 11.81 | 3.13E-01 | 54.40  | 31.62 | 8.53E-02 |
| cg17154542 | 13.19  | 6.22  | 3.40E-02 | 20.36  | 8.46  | 1.61E-02 | 15.79   | 15.33  | 3.03E-01 | 3.18   | 22.81 | 8.89E-01 | -3.04  | 13.28 | 8.19E-01 |
| cg23205936 | -10.45 | 4.93  | 3.40E-02 | -19.45 | 8.78  | 2.67E-02 | -2.94   | 11.80  | 8.03E-01 | -2.68  | 9.18  | 7.70E-01 | -13.63 | 10.45 | 1.92E-01 |
| cg16738180 | 18.81  | 8.88  | 3.40E-02 | 10.61  | 13.64 | 4.37E-01 | 13.30   | 18.77  | 4.79E-01 | 18.33  | 22.65 | 4.18E-01 | 42.80  | 19.88 | 3.13E-02 |
| cg16035777 | -10.17 | 4.80  | 3.40E-02 | -17.19 | 7.41  | 2.03E-02 | -19.97  | 11.75  | 8.91E-02 | 0.11   | 7.25  | 9.88E-01 | -8.63  | 10.18 | 3.96E-01 |

|            |        |       |          |        |       |          |        |        |          |        |       |          |        |       |          |
|------------|--------|-------|----------|--------|-------|----------|--------|--------|----------|--------|-------|----------|--------|-------|----------|
| cg09355697 | 24.57  | 11.59 | 3.40E-02 | 17.05  | 18.45 | 3.55E-01 | 32.84  | 24.56  | 1.81E-01 | 23.03  | 23.73 | 3.32E-01 | 34.93  | 30.56 | 2.53E-01 |
| cg07540326 | -8.13  | 3.84  | 3.40E-02 | -12.54 | 11.83 | 2.89E-01 | -14.92 | 20.17  | 4.60E-01 | -7.47  | 4.38  | 8.79E-02 | -5.91  | 12.71 | 6.42E-01 |
| cg15809352 | -25.04 | 11.81 | 3.40E-02 | -17.72 | 23.38 | 4.48E-01 | -0.89  | 33.86  | 9.79E-01 | -31.00 | 16.24 | 5.63E-02 | -42.51 | 38.46 | 2.69E-01 |
| cg02309725 | 9.14   | 4.31  | 3.40E-02 | 5.24   | 8.10  | 5.17E-01 | 7.35   | 8.98   | 4.13E-01 | 12.31  | 6.93  | 7.58E-02 | 12.06  | 13.69 | 3.78E-01 |
| cg13655242 | -7.45  | 3.52  | 3.40E-02 | -4.41  | 8.18  | 5.90E-01 | -11.12 | 12.70  | 3.81E-01 | -6.47  | 4.38  | 1.40E-01 | -17.04 | 11.40 | 1.35E-01 |
| cg17497419 | -29.05 | 13.71 | 3.40E-02 | -30.78 | 39.87 | 4.40E-01 | 210.52 | 205.65 | 3.06E-01 | -30.73 | 15.35 | 4.52E-02 | -23.03 | 48.55 | 6.35E-01 |
| cg23160016 | 7.56   | 3.57  | 3.40E-02 | 11.42  | 5.21  | 2.84E-02 | 4.38   | 12.35  | 7.23E-01 | 12.92  | 10.07 | 2.00E-01 | 0.70   | 6.27  | 9.11E-01 |
| cg24656529 | 6.93   | 3.27  | 3.40E-02 | 3.55   | 6.22  | 5.68E-01 | 14.47  | 9.54   | 1.29E-01 | 9.34   | 4.46  | 3.65E-02 | -8.73  | 11.66 | 4.54E-01 |
| cg18014983 | -5.16  | 2.43  | 3.41E-02 | -2.90  | 3.61  | 4.22E-01 | -7.63  | 5.09   | 1.34E-01 | -7.22  | 8.00  | 3.67E-01 | -6.34  | 5.11  | 2.15E-01 |
| cg11581706 | 15.28  | 7.21  | 3.41E-02 | 18.89  | 15.20 | 2.14E-01 | -4.75  | 20.37  | 8.16E-01 | 15.84  | 10.58 | 1.34E-01 | 23.04  | 16.75 | 1.69E-01 |
| cg14948804 | -6.93  | 3.27  | 3.41E-02 | -10.32 | 5.82  | 7.62E-02 | -8.15  | 13.87  | 5.57E-01 | -4.51  | 4.56  | 3.23E-01 | -7.88  | 9.68  | 4.16E-01 |
| cg24374013 | -10.81 | 5.10  | 3.41E-02 | -12.44 | 7.50  | 9.72E-02 | -10.30 | 12.26  | 4.01E-01 | -9.32  | 15.03 | 5.35E-01 | -8.83  | 10.22 | 3.87E-01 |
| cg03426888 | 10.90  | 5.14  | 3.41E-02 | 17.20  | 6.20  | 5.56E-03 | 21.18  | 14.06  | 1.32E-01 | 1.24   | 12.59 | 9.22E-01 | -0.15  | 9.34  | 9.87E-01 |
| cg06727269 | 19.10  | 9.01  | 3.41E-02 | 14.26  | 10.84 | 1.88E-01 | 22.07  | 34.70  | 5.25E-01 | 13.04  | 50.29 | 7.95E-01 | 35.07  | 19.71 | 7.52E-02 |
| cg06912814 | -14.89 | 7.03  | 3.41E-02 | -26.04 | 14.51 | 7.27E-02 | 6.66   | 16.97  | 6.95E-01 | -19.27 | 10.12 | 5.69E-02 | -5.65  | 21.05 | 7.88E-01 |
| cg25306991 | 16.81  | 7.93  | 3.41E-02 | 21.62  | 9.39  | 2.13E-02 | 6.26   | 36.43  | 8.64E-01 | -3.76  | 58.07 | 9.48E-01 | 5.26   | 16.88 | 7.56E-01 |
| cg25360535 | 15.34  | 7.24  | 3.41E-02 | 42.50  | 22.37 | 5.74E-02 | -3.01  | 22.97  | 8.96E-01 | 14.19  | 8.55  | 9.71E-02 | 12.90  | 25.84 | 6.17E-01 |
| cg25216196 | 10.70  | 5.05  | 3.41E-02 | 14.80  | 6.81  | 2.97E-02 | 22.62  | 12.53  | 7.12E-02 | 5.94   | 11.76 | 6.13E-01 | -3.93  | 10.91 | 7.18E-01 |
| cg17431888 | 12.80  | 6.04  | 3.41E-02 | 17.74  | 10.39 | 8.78E-02 | 7.18   | 12.45  | 5.64E-01 | -1.23  | 16.00 | 9.39E-01 | 18.63  | 11.34 | 1.00E-01 |
| cg25692290 | 17.40  | 8.21  | 3.41E-02 | 13.90  | 33.55 | 6.79E-01 | -69.37 | 106.25 | 5.14E-01 | 21.05  | 8.70  | 1.56E-02 | -39.57 | 39.04 | 3.11E-01 |
| cg25500948 | -13.61 | 6.42  | 3.41E-02 | -26.19 | 11.93 | 2.82E-02 | -9.91  | 13.39  | 4.59E-01 | -4.21  | 5.21  | 4.19E-01 | -27.36 | 13.20 | 3.82E-02 |
| cg04722215 | -6.34  | 2.99  | 3.41E-02 | -5.04  | 3.84  | 1.89E-01 | -13.54 | 8.00   | 9.06E-02 | -6.61  | 10.23 | 5.19E-01 | -4.87  | 7.29  | 5.04E-01 |
| cg22266211 | 10.85  | 5.12  | 3.41E-02 | 22.50  | 7.02  | 1.36E-03 | 1.25   | 9.88   | 8.99E-01 | 10.71  | 7.33  | 1.44E-01 | 1.74   | 10.25 | 8.65E-01 |
| cg11578064 | 12.32  | 5.81  | 3.41E-02 | 5.80   | 12.40 | 6.40E-01 | 32.65  | 19.10  | 8.73E-02 | 9.69   | 7.34  | 1.87E-01 | 32.41  | 23.78 | 1.73E-01 |
| cg03970319 | 23.63  | 11.15 | 3.41E-02 | 59.78  | 35.00 | 8.76E-02 | -15.82 | 138.34 | 9.09E-01 | 18.90  | 12.36 | 1.26E-01 | 29.18  | 39.79 | 4.63E-01 |
| cg12399700 | 13.38  | 6.31  | 3.41E-02 | 23.17  | 13.44 | 8.46E-02 | 22.53  | 18.86  | 2.32E-01 | 12.56  | 9.56  | 1.89E-01 | 1.14   | 13.12 | 9.31E-01 |
| cg14138540 | 7.62   | 3.60  | 3.41E-02 | 5.81   | 4.66  | 2.13E-01 | 15.33  | 8.97   | 8.72E-02 | 6.88   | 10.60 | 5.16E-01 | 7.01   | 9.99  | 4.83E-01 |
| cg25685934 | 20.63  | 9.74  | 3.41E-02 | 25.18  | 20.71 | 2.24E-01 | 11.61  | 20.93  | 5.79E-01 | 24.14  | 14.41 | 9.39E-02 | 14.43  | 29.98 | 6.30E-01 |
| cg25987744 | 9.44   | 4.46  | 3.41E-02 | 10.35  | 6.96  | 1.37E-01 | 19.36  | 10.97  | 7.76E-02 | -2.23  | 9.63  | 8.17E-01 | 11.76  | 9.70  | 2.25E-01 |
| cg27304666 | 18.67  | 8.81  | 3.41E-02 | 11.01  | 16.27 | 4.99E-01 | 8.41   | 17.66  | 6.34E-01 | 24.62  | 15.21 | 1.06E-01 | 41.67  | 25.23 | 9.86E-02 |
| cg08301965 | 20.52  | 9.68  | 3.41E-02 | 25.09  | 17.88 | 1.61E-01 | -4.64  | 18.77  | 8.05E-01 | 30.14  | 17.45 | 8.41E-02 | 38.57  | 26.61 | 1.47E-01 |
| cg11475454 | 12.20  | 5.76  | 3.41E-02 | 11.66  | 8.95  | 1.93E-01 | 2.21   | 12.56  | 8.60E-01 | 34.99  | 15.96 | 2.84E-02 | 9.59   | 11.62 | 4.09E-01 |
| cg01106649 | 17.47  | 8.25  | 3.41E-02 | 31.45  | 20.72 | 1.29E-01 | 19.54  | 39.41  | 6.20E-01 | 15.03  | 9.89  | 1.29E-01 | 11.57  | 25.76 | 6.53E-01 |
| cg04305082 | 18.78  | 8.86  | 3.41E-02 | 45.19  | 18.81 | 1.63E-02 | 14.19  | 19.06  | 4.57E-01 | 14.10  | 12.92 | 2.75E-01 | -6.72  | 27.34 | 8.06E-01 |
| cg14969094 | -9.42  | 4.45  | 3.41E-02 | -4.69  | 6.37  | 4.62E-01 | -5.89  | 12.47  | 6.37E-01 | -26.42 | 11.57 | 2.24E-02 | -10.43 | 9.12  | 2.52E-01 |

|                |        |       |          |        |       |          |        |        |          |        |       |          |        |       |          |
|----------------|--------|-------|----------|--------|-------|----------|--------|--------|----------|--------|-------|----------|--------|-------|----------|
| cg09605818     | 20.74  | 9.79  | 3.41E-02 | 29.81  | 18.52 | 1.07E-01 | 2.66   | 23.95  | 9.12E-01 | 11.76  | 13.26 | 3.76E-01 | 59.37  | 27.50 | 3.09E-02 |
| cg12691330     | -12.32 | 5.82  | 3.41E-02 | -19.79 | 6.35  | 1.84E-03 | -3.66  | 10.25  | 7.21E-01 | 1.00   | 8.78  | 9.09E-01 | -22.85 | 8.85  | 9.81E-03 |
| cg26757722     | 5.18   | 2.44  | 3.41E-02 | 3.36   | 4.28  | 4.33E-01 | 4.76   | 7.98   | 5.51E-01 | 6.81   | 3.68  | 6.44E-02 | 4.55   | 6.54  | 4.87E-01 |
| cg06671962     | -8.18  | 3.86  | 3.41E-02 | -10.65 | 5.81  | 6.65E-02 | 2.05   | 8.55   | 8.11E-01 | -14.85 | 11.40 | 1.93E-01 | -9.13  | 7.90  | 2.48E-01 |
| cg01410163     | 27.50  | 12.98 | 3.41E-02 | 47.12  | 20.53 | 2.17E-02 | 9.63   | 43.10  | 8.23E-01 | 16.13  | 28.02 | 5.65E-01 | 14.66  | 23.92 | 5.40E-01 |
| cg15219145     | 16.24  | 7.67  | 3.41E-02 | 25.96  | 19.88 | 1.91E-01 | -2.82  | 24.41  | 9.08E-01 | 19.91  | 10.13 | 4.94E-02 | 6.97   | 18.06 | 7.00E-01 |
| cg06857900     | -16.90 | 7.98  | 3.42E-02 | -25.15 | 15.73 | 1.10E-01 | 3.65   | 20.17  | 8.57E-01 | -15.07 | 11.97 | 2.08E-01 | -30.35 | 21.19 | 1.52E-01 |
| cg07279214     | 48.07  | 22.70 | 3.42E-02 | 41.64  | 40.76 | 3.07E-01 | 296.73 | 152.90 | 5.23E-02 | 43.05  | 30.62 | 1.60E-01 | 41.99  | 65.92 | 5.24E-01 |
| cg15680020     | 25.53  | 12.05 | 3.42E-02 | 28.41  | 15.76 | 7.14E-02 | -19.42 | 34.65  | 5.75E-01 | 86.94  | 59.74 | 1.46E-01 | 30.47  | 23.94 | 2.03E-01 |
| cg07138217     | 20.52  | 9.69  | 3.42E-02 | 26.44  | 18.58 | 1.55E-01 | 29.01  | 21.23  | 1.72E-01 | 9.70   | 14.75 | 5.11E-01 | 35.07  | 32.51 | 2.81E-01 |
| cg09615056     | 5.89   | 2.78  | 3.42E-02 | 7.20   | 4.11  | 7.99E-02 | 1.84   | 5.83   | 7.52E-01 | 11.29  | 8.76  | 1.97E-01 | 4.85   | 6.02  | 4.20E-01 |
| cg17614506     | -6.72  | 3.17  | 3.42E-02 | -8.04  | 5.23  | 1.24E-01 | 0.16   | 8.21   | 9.84E-01 | -5.71  | 5.75  | 3.20E-01 | -11.47 | 7.52  | 1.27E-01 |
| cg21506565     | 5.96   | 2.81  | 3.42E-02 | 9.24   | 3.93  | 1.87E-02 | -0.83  | 7.63   | 9.14E-01 | 11.16  | 7.76  | 1.51E-01 | -0.10  | 5.80  | 9.86E-01 |
| cg27266176     | 10.01  | 4.73  | 3.42E-02 | 10.59  | 7.75  | 1.72E-01 | 13.31  | 13.20  | 3.13E-01 | 0.37   | 8.21  | 9.64E-01 | 23.98  | 11.09 | 3.06E-02 |
| ch.19.1079710R | -14.89 | 7.03  | 3.42E-02 | -11.58 | 8.75  | 1.86E-01 | -0.63  | 23.27  | 9.78E-01 | -6.24  | 26.62 | 8.15E-01 | -35.89 | 16.01 | 2.50E-02 |
| cg04445427     | 6.33   | 2.99  | 3.42E-02 | 7.33   | 4.08  | 7.23E-02 | 13.60  | 6.64   | 4.06E-02 | 5.02   | 5.51  | 3.62E-01 | -5.62  | 8.37  | 5.02E-01 |
| cg06674731     | 10.04  | 4.74  | 3.42E-02 | 14.81  | 9.52  | 1.20E-01 | 3.64   | 10.58  | 7.31E-01 | 20.63  | 10.52 | 4.99E-02 | 4.16   | 8.03  | 6.05E-01 |
| cg26444528     | 8.38   | 3.96  | 3.42E-02 | 15.58  | 7.24  | 3.14E-02 | 7.57   | 8.52   | 3.74E-01 | 5.46   | 9.25  | 5.55E-01 | 3.61   | 7.21  | 6.17E-01 |
| cg06168404     | -11.09 | 5.23  | 3.42E-02 | -13.22 | 11.71 | 2.59E-01 | 3.67   | 22.12  | 8.68E-01 | -9.85  | 6.56  | 1.33E-01 | -22.17 | 15.97 | 1.65E-01 |
| cg05882878     | -23.44 | 11.07 | 3.42E-02 | -5.47  | 10.64 | 6.07E-01 | -48.75 | 41.03  | 2.35E-01 | -37.97 | 21.38 | 7.57E-02 | -39.84 | 19.00 | 3.60E-02 |
| cg01722297     | 15.20  | 7.18  | 3.42E-02 | 11.23  | 9.20  | 2.22E-01 | 13.96  | 18.67  | 4.55E-01 | 7.62   | 39.45 | 8.47E-01 | 28.75  | 15.64 | 6.61E-02 |
| cg04549460     | 14.96  | 7.06  | 3.42E-02 | 23.39  | 10.34 | 2.37E-02 | 11.00  | 23.09  | 6.34E-01 | 22.76  | 20.65 | 2.70E-01 | 1.11   | 12.43 | 9.29E-01 |
| cg12306086     | 5.90   | 2.79  | 3.42E-02 | 6.12   | 3.82  | 1.09E-01 | 8.88   | 6.41   | 1.66E-01 | 2.09   | 9.22  | 8.21E-01 | 4.12   | 6.45  | 5.23E-01 |
| cg14773523     | 20.27  | 9.57  | 3.42E-02 | 27.85  | 19.88 | 1.61E-01 | -18.65 | 36.09  | 6.05E-01 | 19.51  | 12.62 | 1.22E-01 | 31.78  | 27.30 | 2.44E-01 |
| cg14523841     | 20.97  | 9.90  | 3.42E-02 | 37.36  | 22.20 | 9.24E-02 | -24.05 | 27.51  | 3.82E-01 | 22.31  | 9.44  | 1.81E-02 | 36.89  | 29.31 | 2.08E-01 |
| cg06132694     | 24.57  | 11.60 | 3.42E-02 | 26.08  | 16.49 | 1.14E-01 | -23.25 | 51.81  | 6.54E-01 | 66.71  | 35.78 | 6.23E-02 | 16.63  | 19.61 | 3.97E-01 |
| cg17716358     | 23.89  | 11.28 | 3.42E-02 | 14.09  | 19.82 | 4.77E-01 | 31.98  | 21.07  | 1.29E-01 | 8.40   | 14.29 | 5.57E-01 | 65.11  | 26.07 | 1.25E-02 |
| cg13051970     | -11.85 | 5.60  | 3.42E-02 | -20.36 | 8.03  | 1.12E-02 | -4.31  | 13.71  | 7.53E-01 | 0.80   | 16.59 | 9.62E-01 | -5.70  | 11.57 | 6.22E-01 |
| cg01216623     | 39.08  | 18.45 | 3.42E-02 | 45.94  | 21.06 | 2.92E-02 | 51.79  | 95.41  | 5.87E-01 | -73.97 | 85.71 | 3.88E-01 | 35.68  | 47.83 | 4.56E-01 |
| cg09510531     | 9.09   | 4.29  | 3.42E-02 | 5.07   | 5.83  | 3.85E-01 | 4.09   | 14.25  | 7.74E-01 | 13.99  | 10.13 | 1.67E-01 | 18.39  | 9.89  | 6.30E-02 |
| cg11703179     | -14.68 | 6.93  | 3.42E-02 | -2.32  | 18.74 | 9.01E-01 | -4.02  | 36.50  | 9.12E-01 | -19.36 | 7.91  | 1.44E-02 | 10.89  | 28.46 | 7.02E-01 |
| cg15526387     | 37.67  | 17.79 | 3.42E-02 | 54.18  | 22.62 | 1.66E-02 | -63.09 | 78.14  | 4.19E-01 | -8.10  | 92.65 | 9.30E-01 | 26.41  | 32.85 | 4.21E-01 |
| cg25342568     | 13.68  | 6.46  | 3.42E-02 | 4.26   | 11.96 | 7.21E-01 | 16.80  | 12.35  | 1.74E-01 | 16.65  | 11.85 | 1.60E-01 | 21.05  | 17.44 | 2.27E-01 |
| cg02121104     | -10.74 | 5.07  | 3.42E-02 | -17.82 | 7.16  | 1.28E-02 | 2.47   | 12.21  | 8.40E-01 | -3.08  | 16.04 | 8.48E-01 | -8.47  | 10.70 | 4.29E-01 |
| cg20569593     | 33.74  | 15.93 | 3.42E-02 | 48.86  | 44.85 | 2.76E-01 | -24.76 | 212.80 | 9.07E-01 | 33.21  | 17.74 | 6.11E-02 | 14.84  | 64.31 | 8.17E-01 |

|            |        |       |          |        |       |          |         |        |          |        |       |          |        |       |          |
|------------|--------|-------|----------|--------|-------|----------|---------|--------|----------|--------|-------|----------|--------|-------|----------|
| cg24938761 | 4.87   | 2.30  | 3.42E-02 | 4.92   | 2.81  | 8.01E-02 | 9.48    | 6.00   | 1.14E-01 | -0.18  | 8.03  | 9.83E-01 | 1.95   | 7.21  | 7.87E-01 |
| cg13187349 | -16.10 | 7.60  | 3.42E-02 | -13.39 | 11.50 | 2.44E-01 | 11.23   | 24.92  | 6.52E-01 | -15.07 | 13.69 | 2.71E-01 | -40.96 | 18.85 | 2.98E-02 |
| cg14023558 | -40.48 | 19.12 | 3.42E-02 | -24.95 | 23.40 | 2.86E-01 | -108.19 | 97.71  | 2.68E-01 | -81.20 | 79.82 | 3.09E-01 | -63.42 | 39.28 | 1.06E-01 |
| cg16986748 | 10.96  | 5.18  | 3.42E-02 | 13.34  | 6.90  | 5.33E-02 | 8.15    | 15.87  | 6.07E-01 | 17.72  | 11.05 | 1.09E-01 | -11.56 | 15.46 | 4.54E-01 |
| cg13852284 | 5.33   | 2.52  | 3.42E-02 | 5.60   | 3.33  | 9.27E-02 | 13.57   | 7.22   | 6.01E-02 | 3.07   | 6.16  | 6.19E-01 | -0.24  | 6.75  | 9.71E-01 |
| cg20263444 | 31.08  | 14.68 | 3.42E-02 | 11.13  | 45.03 | 8.05E-01 | -115.73 | 175.04 | 5.09E-01 | 39.65  | 16.35 | 1.53E-02 | -15.27 | 51.62 | 7.67E-01 |
| cg13001012 | -12.25 | 5.79  | 3.42E-02 | -22.37 | 9.74  | 2.16E-02 | -4.13   | 13.68  | 7.62E-01 | -6.55  | 11.61 | 5.72E-01 | -9.05  | 12.34 | 4.63E-01 |
| cg04582843 | -42.30 | 19.98 | 3.42E-02 | -21.58 | 28.64 | 4.51E-01 | -87.25  | 48.03  | 6.93E-02 | -74.72 | 54.75 | 1.72E-01 | -32.58 | 43.87 | 4.58E-01 |
| cg12820122 | -31.81 | 15.03 | 3.42E-02 | -41.77 | 47.08 | 3.75E-01 | -215.06 | 217.30 | 3.22E-01 | -33.63 | 16.48 | 4.13E-02 | 22.75  | 60.21 | 7.06E-01 |
| cg17238065 | 4.75   | 2.24  | 3.42E-02 | 4.92   | 2.73  | 7.10E-02 | 10.22   | 6.21   | 9.98E-02 | 4.39   | 7.34  | 5.49E-01 | -3.25  | 7.10  | 6.47E-01 |
| cg14360448 | -16.77 | 7.92  | 3.42E-02 | -9.26  | 11.25 | 4.11E-01 | -53.70  | 29.40  | 6.77E-02 | -19.63 | 17.32 | 2.57E-01 | -18.74 | 16.77 | 2.64E-01 |
| cg11738198 | -7.38  | 3.49  | 3.42E-02 | -8.04  | 6.69  | 2.29E-01 | -11.96  | 10.22  | 2.42E-01 | -6.32  | 5.20  | 2.24E-01 | -5.95  | 8.68  | 4.93E-01 |
| cg23983449 | 13.99  | 6.61  | 3.43E-02 | 13.98  | 9.53  | 1.42E-01 | 9.01    | 15.14  | 5.52E-01 | 30.03  | 19.58 | 1.25E-01 | 9.91   | 14.26 | 4.87E-01 |
| cg24078363 | -39.10 | 18.47 | 3.43E-02 | -89.13 | 44.69 | 4.61E-02 | -161.63 | 200.33 | 4.20E-01 | -21.07 | 21.55 | 3.28E-01 | -81.22 | 62.73 | 1.95E-01 |
| cg20704560 | 6.89   | 3.25  | 3.43E-02 | 8.10   | 4.72  | 8.61E-02 | 7.15    | 7.09   | 3.13E-01 | 2.33   | 10.56 | 8.25E-01 | 5.99   | 6.96  | 3.90E-01 |
| cg00181669 | -8.15  | 3.85  | 3.43E-02 | -20.80 | 10.21 | 4.16E-02 | -13.32  | 20.06  | 5.07E-01 | -4.29  | 4.49  | 3.40E-01 | -17.83 | 13.03 | 1.71E-01 |
| cg08297985 | 9.37   | 4.43  | 3.43E-02 | 12.24  | 6.70  | 6.79E-02 | 10.19   | 9.90   | 3.03E-01 | 4.20   | 9.40  | 6.55E-01 | 7.46   | 11.69 | 5.23E-01 |
| cg07024017 | -44.96 | 21.24 | 3.43E-02 | -65.98 | 27.56 | 1.66E-02 | 12.21   | 67.91  | 8.57E-01 | -58.11 | 82.07 | 4.79E-01 | -12.71 | 43.26 | 7.69E-01 |
| cg15891757 | -29.61 | 13.99 | 3.43E-02 | -40.44 | 22.63 | 7.39E-02 | -92.89  | 40.81  | 2.28E-02 | -10.83 | 9.82  | 2.70E-01 | -30.12 | 26.62 | 2.58E-01 |
| cg02415470 | 17.16  | 8.11  | 3.43E-02 | 6.96   | 12.53 | 5.78E-01 | 30.79   | 17.79  | 8.36E-02 | 19.32  | 19.16 | 3.13E-01 | 22.62  | 18.40 | 2.19E-01 |
| cg12400702 | -12.24 | 5.78  | 3.43E-02 | -20.87 | 12.59 | 9.75E-02 | -5.85   | 31.88  | 8.54E-01 | -13.30 | 7.29  | 6.82E-02 | 5.49   | 16.11 | 7.34E-01 |
| cg27368025 | 11.85  | 5.60  | 3.43E-02 | 18.74  | 6.81  | 5.90E-03 | 19.53   | 12.04  | 1.05E-01 | -5.59  | 11.57 | 6.29E-01 | 7.41   | 11.15 | 5.06E-01 |
| cg00396158 | 16.36  | 7.73  | 3.43E-02 | 26.00  | 10.53 | 1.36E-02 | 5.34    | 22.68  | 8.14E-01 | 16.99  | 19.33 | 3.80E-01 | -5.28  | 17.96 | 7.69E-01 |
| cg09082852 | 18.18  | 8.59  | 3.43E-02 | 29.85  | 21.24 | 1.60E-01 | 2.93    | 24.30  | 9.04E-01 | 14.00  | 10.81 | 1.95E-01 | 51.19  | 30.40 | 9.22E-02 |
| cg26348348 | 10.58  | 5.00  | 3.43E-02 | 3.58   | 8.05  | 6.56E-01 | 16.28   | 14.03  | 2.46E-01 | 13.41  | 8.73  | 1.24E-01 | 17.07  | 12.48 | 1.71E-01 |
| cg24089887 | 10.77  | 5.09  | 3.43E-02 | 5.67   | 9.99  | 5.70E-01 | -2.04   | 12.41  | 8.69E-01 | 18.16  | 7.50  | 1.55E-02 | 11.42  | 15.13 | 4.50E-01 |
| cg16083838 | 23.46  | 11.08 | 3.43E-02 | 15.05  | 15.09 | 3.19E-01 | 57.10   | 44.05  | 1.95E-01 | 56.06  | 36.38 | 1.23E-01 | 21.44  | 20.10 | 2.86E-01 |
| cg03988107 | 14.83  | 7.00  | 3.43E-02 | 25.70  | 10.32 | 1.27E-02 | 6.16    | 15.63  | 6.94E-01 | -10.79 | 20.90 | 6.06E-01 | 13.07  | 14.74 | 3.75E-01 |
| cg17221813 | 2.23   | 1.05  | 3.43E-02 | 2.58   | 1.40  | 6.55E-02 | 3.12    | 2.22   | 1.59E-01 | -2.68  | 3.72  | 4.71E-01 | 2.19   | 2.95  | 4.59E-01 |
| cg05208605 | 15.02  | 7.10  | 3.43E-02 | 21.80  | 9.19  | 1.76E-02 | 32.09   | 13.72  | 1.93E-02 | 1.25   | 13.47 | 9.26E-01 | 1.95   | 12.71 | 8.78E-01 |
| cg08940669 | 51.01  | 24.10 | 3.43E-02 | 44.84  | 31.03 | 1.48E-01 | -0.72   | 165.83 | 9.97E-01 | 102.00 | 81.73 | 2.12E-01 | 52.32  | 44.84 | 2.43E-01 |
| cg16172549 | 6.06   | 2.86  | 3.43E-02 | 7.06   | 4.42  | 1.11E-01 | 0.13    | 5.86   | 9.83E-01 | 16.22  | 7.71  | 3.53E-02 | 4.08   | 6.33  | 5.19E-01 |
| cg05638165 | 14.11  | 6.67  | 3.43E-02 | 25.18  | 20.11 | 2.10E-01 | 20.12   | 27.90  | 4.71E-01 | 12.89  | 7.54  | 8.73E-02 | 2.19   | 29.64 | 9.41E-01 |
| cg16696648 | -11.17 | 5.28  | 3.43E-02 | -17.90 | 10.85 | 9.88E-02 | 11.39   | 17.67  | 5.19E-01 | -14.81 | 5.82  | 1.09E-02 | 3.72   | 15.41 | 8.09E-01 |
| cg13726563 | -13.71 | 6.48  | 3.43E-02 | -9.72  | 9.99  | 3.31E-01 | 1.66    | 15.57  | 9.15E-01 | -32.29 | 15.12 | 3.27E-02 | -17.84 | 13.70 | 1.93E-01 |

|            |        |       |          |        |       |          |         |        |          |         |       |          |        |       |          |
|------------|--------|-------|----------|--------|-------|----------|---------|--------|----------|---------|-------|----------|--------|-------|----------|
| cg14154186 | 15.41  | 7.28  | 3.43E-02 | 17.19  | 18.59 | 3.55E-01 | -12.31  | 42.27  | 7.71E-01 | 16.54   | 8.45  | 5.03E-02 | 11.51  | 26.64 | 6.66E-01 |
| cg13801475 | -16.26 | 7.68  | 3.43E-02 | -10.77 | 20.38 | 5.97E-01 | -24.79  | 23.14  | 2.84E-01 | -14.04  | 9.63  | 1.45E-01 | -27.45 | 23.01 | 2.33E-01 |
| cg19693503 | -21.17 | 10.00 | 3.43E-02 | -17.82 | 10.85 | 1.00E-01 | -25.92  | 90.47  | 7.75E-01 | -47.45  | 73.00 | 5.16E-01 | -40.47 | 29.03 | 1.63E-01 |
| cg20959480 | -17.94 | 8.48  | 3.43E-02 | -29.67 | 13.10 | 2.35E-02 | -9.48   | 35.50  | 7.89E-01 | 3.84    | 18.73 | 8.38E-01 | -18.02 | 14.99 | 2.29E-01 |
| cg08156349 | 32.82  | 15.51 | 3.43E-02 | 18.46  | 57.56 | 7.48E-01 | -185.72 | 200.43 | 3.54E-01 | 29.43   | 16.97 | 8.29E-02 | 92.65  | 52.72 | 7.88E-02 |
| cg13424029 | 7.17   | 3.39  | 3.43E-02 | 6.36   | 4.64  | 1.70E-01 | 8.65    | 7.81   | 2.68E-01 | 16.81   | 10.43 | 1.07E-01 | 2.16   | 8.18  | 7.92E-01 |
| cg26451415 | 8.96   | 4.23  | 3.43E-02 | 5.83   | 6.15  | 3.43E-01 | 8.09    | 10.49  | 4.41E-01 | -3.01   | 14.21 | 8.32E-01 | 18.75  | 8.08  | 2.04E-02 |
| cg15076384 | -45.48 | 21.49 | 3.43E-02 | -27.60 | 22.04 | 2.11E-01 | 22.56   | 85.95  | 7.93E-01 | -133.93 | 53.84 | 1.29E-02 | -47.24 | 31.59 | 1.35E-01 |
| cg15812322 | -6.67  | 3.15  | 3.43E-02 | -9.37  | 4.29  | 2.88E-02 | -0.93   | 7.40   | 9.01E-01 | -7.14   | 10.28 | 4.88E-01 | -4.14  | 7.33  | 5.72E-01 |
| cg14510926 | -11.14 | 5.27  | 3.43E-02 | -12.48 | 7.63  | 1.02E-01 | 7.82    | 14.43  | 5.88E-01 | -10.43  | 12.50 | 4.04E-01 | -20.60 | 11.40 | 7.08E-02 |
| cg18375960 | 25.69  | 12.14 | 3.43E-02 | 22.37  | 24.43 | 3.60E-01 | 46.57   | 55.89  | 4.05E-01 | 27.74   | 16.18 | 8.66E-02 | 16.49  | 32.04 | 6.07E-01 |
| cg16724800 | -6.20  | 2.93  | 3.43E-02 | -12.28 | 7.24  | 8.97E-02 | 6.86    | 8.37   | 4.13E-01 | -6.88   | 3.47  | 4.72E-02 | -7.59  | 7.53  | 3.14E-01 |
| cg04251571 | -27.82 | 13.15 | 3.43E-02 | -21.90 | 29.55 | 4.59E-01 | 5.28    | 81.98  | 9.49E-01 | -31.24  | 16.17 | 5.33E-02 | -25.73 | 38.73 | 5.06E-01 |
| cg08867707 | 8.05   | 3.80  | 3.43E-02 | 11.65  | 8.40  | 1.66E-01 | 14.91   | 10.57  | 1.58E-01 | 6.11    | 4.91  | 2.13E-01 | 0.95   | 14.91 | 9.49E-01 |
| cg10221896 | -12.99 | 6.14  | 3.43E-02 | -18.88 | 15.36 | 2.19E-01 | -4.83   | 15.13  | 7.50E-01 | -14.80  | 8.16  | 6.98E-02 | -7.35  | 18.47 | 6.91E-01 |
| cg05584919 | 16.66  | 7.87  | 3.43E-02 | 7.57   | 12.17 | 5.34E-01 | 36.62   | 15.57  | 1.87E-02 | 9.93    | 21.02 | 6.37E-01 | 14.71  | 18.26 | 4.20E-01 |
| cg20750832 | 9.94   | 4.70  | 3.44E-02 | 11.74  | 9.93  | 2.37E-01 | 3.53    | 11.94  | 7.67E-01 | 18.97   | 7.94  | 1.70E-02 | 0.47   | 9.03  | 9.58E-01 |
| cg16280132 | -5.18  | 2.45  | 3.44E-02 | -4.23  | 2.94  | 1.50E-01 | -7.00   | 6.07   | 2.48E-01 | -11.56  | 8.31  | 1.64E-01 | -1.69  | 10.54 | 8.73E-01 |
| cg13908968 | -12.81 | 6.05  | 3.44E-02 | -28.66 | 15.04 | 5.68E-02 | -5.30   | 21.88  | 8.09E-01 | -9.86   | 7.31  | 1.77E-01 | -13.11 | 21.86 | 5.49E-01 |
| cg14707231 | 6.31   | 2.98  | 3.44E-02 | 3.26   | 4.06  | 4.21E-01 | 10.35   | 6.72   | 1.24E-01 | 8.46    | 8.68  | 3.30E-01 | 10.50  | 7.87  | 1.82E-01 |
| cg18004847 | 5.88   | 2.78  | 3.44E-02 | 5.42   | 3.25  | 9.51E-02 | 10.39   | 7.04   | 1.40E-01 | 5.84    | 13.09 | 6.55E-01 | 0.45   | 10.71 | 9.66E-01 |
| cg04887494 | 15.09  | 7.13  | 3.44E-02 | 15.62  | 10.04 | 1.20E-01 | 0.55    | 19.29  | 9.77E-01 | 31.93   | 23.41 | 1.72E-01 | 15.69  | 13.83 | 2.57E-01 |
| cg12415917 | -13.61 | 6.43  | 3.44E-02 | -25.56 | 14.74 | 8.29E-02 | 2.19    | 16.51  | 8.95E-01 | -10.99  | 8.81  | 2.12E-01 | -25.80 | 18.21 | 1.57E-01 |
| cg10004882 | -10.67 | 5.04  | 3.44E-02 | -8.80  | 8.22  | 2.85E-01 | 2.38    | 11.94  | 8.42E-01 | -19.88  | 12.47 | 1.11E-01 | -16.08 | 9.50  | 9.06E-02 |
| cg08359958 | -53.96 | 25.51 | 3.44E-02 | -29.76 | 58.34 | 6.10E-01 | -144.02 | 268.28 | 5.91E-01 | -76.29  | 31.60 | 1.58E-02 | 18.44  | 66.24 | 7.81E-01 |
| cg23948240 | 12.43  | 5.88  | 3.44E-02 | 20.37  | 8.76  | 2.00E-02 | -1.12   | 17.75  | 9.50E-01 | 23.07   | 29.45 | 4.33E-01 | 6.15   | 9.29  | 5.08E-01 |
| cg15946224 | -10.69 | 5.05  | 3.44E-02 | -10.29 | 12.17 | 3.98E-01 | -16.30  | 16.15  | 3.13E-01 | -6.78   | 6.46  | 2.94E-01 | -26.72 | 14.66 | 6.83E-02 |
| cg01342572 | 4.64   | 2.19  | 3.44E-02 | 4.23   | 2.89  | 1.42E-01 | 8.39    | 5.07   | 9.79E-02 | 9.51    | 7.63  | 2.13E-01 | -1.01  | 5.58  | 8.56E-01 |
| cg21139076 | -15.20 | 7.19  | 3.44E-02 | -10.40 | 17.19 | 5.45E-01 | -4.37   | 45.58  | 9.24E-01 | -14.58  | 8.42  | 8.32E-02 | -37.29 | 26.98 | 1.67E-01 |
| cg00372692 | -14.15 | 6.69  | 3.44E-02 | -11.08 | 14.52 | 4.45E-01 | 1.36    | 19.31  | 9.44E-01 | -18.87  | 9.04  | 3.69E-02 | -13.58 | 19.31 | 4.82E-01 |
| cg11827086 | 17.89  | 8.46  | 3.44E-02 | 17.09  | 12.51 | 1.72E-01 | 33.22   | 23.34  | 1.55E-01 | 24.82   | 19.17 | 1.96E-01 | 4.12   | 18.14 | 8.20E-01 |
| cg01611223 | -11.87 | 5.61  | 3.44E-02 | -3.86  | 10.84 | 7.22E-01 | -12.19  | 16.91  | 4.71E-01 | -13.92  | 8.04  | 8.35E-02 | -20.13 | 15.28 | 1.88E-01 |
| cg14161438 | 38.19  | 18.05 | 3.44E-02 | 40.83  | 21.85 | 6.16E-02 | 65.01   | 114.50 | 5.70E-01 | 33.19   | 80.48 | 6.80E-01 | 29.02  | 36.68 | 4.29E-01 |
| cg02232704 | 16.51  | 7.81  | 3.44E-02 | 25.18  | 17.91 | 1.60E-01 | 41.14   | 26.04  | 1.14E-01 | 18.26   | 11.13 | 1.01E-01 | -4.17  | 16.34 | 7.99E-01 |
| cg16998327 | 16.88  | 7.98  | 3.44E-02 | 18.02  | 21.52 | 4.02E-01 | -15.48  | 26.95  | 5.66E-01 | 17.09   | 10.18 | 9.33E-02 | 32.71  | 19.89 | 1.00E-01 |



|            |        |       |          |        |       |          |         |        |          |        |       |          |        |       |          |
|------------|--------|-------|----------|--------|-------|----------|---------|--------|----------|--------|-------|----------|--------|-------|----------|
| cg08284233 | -8.40  | 3.97  | 3.44E-02 | -7.46  | 5.74  | 1.94E-01 | -8.74   | 8.79   | 3.20E-01 | -7.93  | 12.41 | 5.23E-01 | -10.42 | 8.59  | 2.25E-01 |
| cg22388653 | 37.77  | 17.85 | 3.44E-02 | 58.00  | 53.31 | 2.77E-01 | -272.90 | 206.22 | 1.86E-01 | 36.60  | 19.65 | 6.25E-02 | 56.59  | 76.48 | 4.59E-01 |
| cg16097772 | 5.74   | 2.72  | 3.44E-02 | 6.13   | 3.45  | 7.58E-02 | 7.12    | 6.40   | 2.66E-01 | 8.56   | 10.20 | 4.01E-01 | 0.50   | 7.49  | 9.46E-01 |
| cg01003211 | 12.11  | 5.72  | 3.44E-02 | 3.77   | 9.35  | 6.86E-01 | 2.99    | 14.81  | 8.40E-01 | 19.63  | 15.38 | 2.02E-01 | 22.32  | 9.86  | 2.35E-02 |
| cg20867746 | -6.84  | 3.24  | 3.44E-02 | -14.09 | 5.59  | 1.16E-02 | -3.51   | 9.20   | 7.03E-01 | -2.99  | 5.17  | 5.63E-01 | -3.43  | 8.40  | 6.83E-01 |
| cg16905265 | -31.07 | 14.69 | 3.44E-02 | -34.20 | 15.57 | 2.81E-02 | -2.23   | 32.27  | 9.45E-01 | 62.53  | 66.34 | 3.46E-01 | -54.40 | 20.17 | 7.01E-03 |
| cg14501119 | 18.82  | 8.90  | 3.44E-02 | 24.66  | 14.78 | 9.52E-02 | 18.33   | 18.32  | 3.17E-01 | 0.47   | 17.19 | 9.78E-01 | 40.69  | 24.36 | 9.49E-02 |
| cg11834473 | 9.65   | 4.56  | 3.44E-02 | 12.51  | 6.34  | 4.86E-02 | 8.41    | 11.34  | 4.58E-01 | 13.67  | 12.71 | 2.82E-01 | 0.28   | 10.42 | 9.79E-01 |
| cg07568203 | -11.60 | 5.49  | 3.44E-02 | -21.56 | 11.98 | 7.18E-02 | -24.47  | 21.28  | 2.50E-01 | -8.46  | 6.98  | 2.26E-01 | -2.20  | 16.79 | 8.96E-01 |
| cg12932306 | -11.19 | 5.29  | 3.44E-02 | -13.97 | 8.41  | 9.66E-02 | -12.02  | 12.06  | 3.19E-01 | -8.09  | 14.18 | 5.69E-01 | -8.14  | 10.13 | 4.21E-01 |
| cg11454415 | 30.24  | 14.30 | 3.44E-02 | 23.06  | 18.33 | 2.08E-01 | 54.99   | 50.69  | 2.78E-01 | 95.38  | 60.98 | 1.18E-01 | 25.64  | 28.19 | 3.63E-01 |
| cg09037777 | 10.17  | 4.81  | 3.44E-02 | 9.01   | 7.05  | 2.02E-01 | -1.84   | 11.28  | 8.71E-01 | 25.94  | 13.64 | 5.72E-02 | 13.48  | 10.04 | 1.79E-01 |
| cg05205664 | -13.85 | 6.55  | 3.44E-02 | -17.99 | 9.15  | 4.94E-02 | 5.38    | 16.38  | 7.43E-01 | 30.16  | 45.59 | 5.08E-01 | -19.91 | 11.81 | 9.18E-02 |
| cg07960067 | 18.91  | 8.94  | 3.44E-02 | 25.53  | 25.00 | 3.07E-01 | -50.69  | 73.91  | 4.93E-01 | 18.88  | 10.29 | 6.65E-02 | 20.82  | 28.00 | 4.57E-01 |
| cg10724054 | -13.01 | 6.15  | 3.44E-02 | -24.68 | 10.19 | 1.54E-02 | 4.40    | 12.62  | 7.27E-01 | -9.98  | 13.26 | 4.52E-01 | -15.52 | 11.37 | 1.72E-01 |
| cg01389445 | 17.40  | 8.23  | 3.44E-02 | 41.30  | 22.03 | 6.08E-02 | -2.18   | 41.40  | 9.58E-01 | 15.02  | 9.83  | 1.27E-01 | 9.99   | 23.65 | 6.73E-01 |
| cg25432300 | 9.04   | 4.27  | 3.44E-02 | 5.08   | 6.08  | 4.03E-01 | 9.97    | 10.09  | 3.23E-01 | 20.14  | 11.04 | 6.82E-02 | 9.76   | 10.19 | 3.38E-01 |
| cg10835770 | 11.84  | 5.60  | 3.45E-02 | 9.54   | 8.53  | 2.63E-01 | 15.17   | 15.73  | 3.35E-01 | 16.16  | 11.96 | 1.77E-01 | 10.15  | 11.86 | 3.92E-01 |
| cg14286373 | -15.46 | 7.31  | 3.45E-02 | -9.07  | 15.17 | 5.50E-01 | -36.38  | 31.80  | 2.53E-01 | -19.22 | 9.50  | 4.31E-02 | -0.41  | 20.84 | 9.84E-01 |
| cg24142735 | -19.30 | 9.13  | 3.45E-02 | -30.04 | 15.45 | 5.18E-02 | -9.80   | 48.15  | 8.39E-01 | -15.01 | 12.87 | 2.43E-01 | -8.14  | 27.21 | 7.65E-01 |
| cg20390500 | -14.36 | 6.79  | 3.45E-02 | -31.07 | 16.10 | 5.36E-02 | -47.89  | 32.15  | 1.36E-01 | -9.63  | 8.16  | 2.38E-01 | -0.22  | 23.46 | 9.92E-01 |
| cg22338567 | 42.48  | 20.09 | 3.45E-02 | 109.80 | 36.10 | 2.36E-03 | 59.45   | 113.57 | 6.01E-01 | 24.92  | 9.96  | 1.24E-02 | 21.93  | 30.76 | 4.76E-01 |
| cg00588920 | 52.02  | 24.60 | 3.45E-02 | 31.35  | 18.39 | 8.83E-02 | -11.86  | 104.48 | 9.10E-01 | 136.49 | 37.36 | 2.59E-04 | 28.09  | 22.27 | 2.07E-01 |
| cg21265783 | -56.35 | 26.65 | 3.45E-02 | -28.91 | 27.40 | 2.91E-01 | -158.02 | 57.32  | 5.84E-03 | -25.39 | 65.11 | 6.97E-01 | -52.14 | 43.92 | 2.35E-01 |
| cg14327505 | -6.56  | 3.10  | 3.45E-02 | -1.77  | 5.70  | 7.56E-01 | -3.99   | 9.92   | 6.87E-01 | -10.41 | 4.70  | 2.68E-02 | -6.53  | 7.53  | 3.86E-01 |
| cg17359198 | 11.75  | 5.56  | 3.45E-02 | 21.94  | 10.29 | 3.30E-02 | -0.64   | 14.32  | 9.64E-01 | 13.12  | 7.72  | 8.90E-02 | -11.45 | 20.31 | 5.73E-01 |
| cg19774846 | -8.51  | 4.02  | 3.45E-02 | -9.36  | 5.55  | 9.19E-02 | -9.60   | 11.10  | 3.87E-01 | 1.34   | 10.76 | 9.01E-01 | -12.37 | 8.91  | 1.65E-01 |
| cg00171084 | 33.42  | 15.81 | 3.45E-02 | 21.69  | 19.28 | 2.61E-01 | 70.73   | 66.66  | 2.89E-01 | -11.51 | 75.71 | 8.79E-01 | 67.41  | 33.11 | 4.17E-02 |
| cg05700681 | -18.68 | 8.83  | 3.45E-02 | -16.61 | 15.50 | 2.84E-01 | -9.87   | 19.83  | 6.19E-01 | -14.59 | 16.69 | 3.82E-01 | -36.80 | 19.92 | 6.47E-02 |
| cg07413941 | 31.95  | 15.11 | 3.45E-02 | 26.57  | 17.68 | 1.33E-01 | 21.32   | 100.41 | 8.32E-01 | 69.82  | 82.22 | 3.96E-01 | 45.57  | 32.76 | 1.64E-01 |
| cg21477907 | 12.43  | 5.88  | 3.45E-02 | 19.71  | 13.15 | 1.34E-01 | 33.74   | 42.30  | 4.25E-01 | 8.28   | 7.05  | 2.40E-01 | 24.44  | 20.16 | 2.25E-01 |
| cg08815583 | 20.46  | 9.68  | 3.45E-02 | 31.22  | 18.93 | 9.91E-02 | 35.53   | 19.80  | 7.27E-02 | -0.70  | 15.16 | 9.63E-01 | 34.03  | 25.53 | 1.83E-01 |
| cg07266910 | 5.58   | 2.64  | 3.45E-02 | 6.19   | 3.75  | 9.86E-02 | 1.48    | 6.10   | 8.09E-01 | 2.97   | 6.93  | 6.68E-01 | 10.43  | 6.34  | 1.00E-01 |
| cg10898212 | 14.05  | 6.65  | 3.45E-02 | 0.90   | 10.43 | 9.32E-01 | 17.90   | 10.91  | 1.01E-01 | 25.31  | 7.02  | 3.14E-04 | -0.10  | 16.28 | 9.95E-01 |
| cg06354193 | -16.73 | 7.91  | 3.45E-02 | -23.91 | 15.87 | 1.32E-01 | -9.27   | 19.12  | 6.28E-01 | -22.62 | 11.68 | 5.27E-02 | 9.78   | 22.72 | 6.67E-01 |

|            |        |       |          |        |       |          |         |        |          |        |       |          |        |       |          |
|------------|--------|-------|----------|--------|-------|----------|---------|--------|----------|--------|-------|----------|--------|-------|----------|
| cg04737356 | -20.30 | 9.60  | 3.45E-02 | -15.53 | 15.60 | 3.20E-01 | -38.43  | 28.38  | 1.76E-01 | -39.63 | 20.84 | 5.72E-02 | -5.45  | 17.69 | 7.58E-01 |
| cg15082257 | -8.55  | 4.05  | 3.45E-02 | -5.38  | 7.16  | 4.52E-01 | -14.32  | 9.49   | 1.31E-01 | -3.89  | 4.52  | 3.89E-01 | -24.39 | 10.55 | 2.07E-02 |
| cg18258916 | 25.94  | 12.27 | 3.45E-02 | 22.33  | 20.53 | 2.77E-01 | 64.96   | 24.42  | 7.81E-03 | 7.76   | 16.14 | 6.31E-01 | 25.09  | 30.65 | 4.13E-01 |
| cg03025880 | -12.14 | 5.74  | 3.45E-02 | -14.39 | 8.70  | 9.81E-02 | -8.34   | 13.19  | 5.27E-01 | -7.45  | 17.41 | 6.69E-01 | -13.07 | 11.13 | 2.40E-01 |
| cg18032164 | 9.28   | 4.39  | 3.45E-02 | 9.62   | 6.26  | 1.24E-01 | 17.27   | 10.59  | 1.03E-01 | 10.62  | 9.25  | 2.51E-01 | -7.38  | 13.19 | 5.76E-01 |
| cg20971147 | -8.13  | 3.85  | 3.45E-02 | -13.06 | 5.41  | 1.58E-02 | -4.76   | 7.88   | 5.45E-01 | 7.41   | 10.65 | 4.87E-01 | -10.67 | 7.99  | 1.81E-01 |
| cg06776976 | 12.63  | 5.97  | 3.45E-02 | 13.66  | 7.83  | 8.10E-02 | 28.53   | 16.75  | 8.85E-02 | 1.17   | 22.02 | 9.58E-01 | 4.42   | 12.83 | 7.30E-01 |
| cg02611998 | 17.94  | 8.49  | 3.45E-02 | 24.62  | 17.37 | 1.56E-01 | -8.64   | 34.46  | 8.02E-01 | 15.84  | 11.10 | 1.54E-01 | 28.74  | 24.93 | 2.49E-01 |
| cg21578207 | 7.99   | 3.78  | 3.45E-02 | 7.45   | 4.81  | 1.22E-01 | 14.80   | 10.62  | 1.63E-01 | 1.02   | 11.29 | 9.28E-01 | 9.71   | 9.93  | 3.28E-01 |
| cg01055281 | 16.90  | 8.00  | 3.45E-02 | 17.66  | 13.65 | 1.96E-01 | 16.64   | 14.49  | 2.51E-01 | 11.64  | 17.55 | 5.07E-01 | 23.25  | 21.04 | 2.69E-01 |
| cg00747944 | 17.33  | 8.20  | 3.45E-02 | 22.58  | 14.25 | 1.13E-01 | 12.49   | 21.43  | 5.60E-01 | 31.79  | 17.10 | 6.30E-02 | 2.49   | 15.13 | 8.69E-01 |
| cg00388391 | 13.06  | 6.18  | 3.45E-02 | 13.86  | 8.96  | 1.22E-01 | 23.61   | 17.18  | 1.69E-01 | 17.50  | 19.20 | 3.62E-01 | 5.50   | 11.44 | 6.31E-01 |
| cg24594504 | 25.25  | 11.95 | 3.45E-02 | 22.56  | 17.12 | 1.88E-01 | 24.55   | 40.16  | 5.41E-01 | 34.91  | 35.01 | 3.19E-01 | 26.05  | 21.52 | 2.26E-01 |
| cg00054890 | 21.20  | 10.03 | 3.45E-02 | 5.27   | 23.16 | 8.20E-01 | 15.20   | 24.65  | 5.38E-01 | 24.56  | 13.27 | 6.43E-02 | 48.15  | 36.30 | 1.85E-01 |
| cg03091590 | 11.97  | 5.66  | 3.45E-02 | 10.94  | 13.59 | 4.21E-01 | 19.51   | 18.09  | 2.81E-01 | 12.01  | 6.84  | 7.93E-02 | -1.37  | 26.98 | 9.59E-01 |
| cg14783639 | 12.68  | 6.00  | 3.45E-02 | 25.23  | 13.93 | 7.01E-02 | 10.53   | 23.08  | 6.48E-01 | 8.73   | 7.25  | 2.29E-01 | 21.15  | 24.09 | 3.80E-01 |
| cg20524972 | 16.75  | 7.93  | 3.45E-02 | 19.28  | 20.57 | 3.48E-01 | 63.96   | 85.80  | 4.56E-01 | 13.91  | 8.98  | 1.22E-01 | 39.08  | 31.25 | 2.11E-01 |
| cg15231749 | 18.16  | 8.59  | 3.46E-02 | 16.44  | 14.17 | 2.46E-01 | 30.81   | 15.06  | 4.07E-02 | 21.80  | 21.17 | 3.03E-01 | -10.63 | 22.79 | 6.41E-01 |
| cg17338299 | -10.74 | 5.08  | 3.46E-02 | -13.71 | 12.60 | 2.77E-01 | -12.86  | 14.16  | 3.64E-01 | -10.90 | 6.46  | 9.15E-02 | -1.21  | 16.95 | 9.43E-01 |
| cg05071770 | -15.04 | 7.12  | 3.46E-02 | -3.85  | 18.27 | 8.33E-01 | 12.34   | 29.72  | 6.78E-01 | -18.62 | 8.35  | 2.57E-02 | -25.32 | 28.04 | 3.67E-01 |
| cg08798862 | -8.14  | 3.85  | 3.46E-02 | -8.55  | 5.11  | 9.46E-02 | -12.71  | 8.96   | 1.56E-01 | 12.27  | 13.25 | 3.54E-01 | -12.16 | 9.56  | 2.03E-01 |
| cg23837799 | 24.74  | 11.70 | 3.46E-02 | 26.96  | 32.17 | 4.02E-01 | 24.45   | 136.68 | 8.58E-01 | 27.90  | 13.36 | 3.67E-02 | -4.75  | 38.52 | 9.02E-01 |
| cg10729325 | -26.64 | 12.61 | 3.46E-02 | -49.06 | 30.35 | 1.06E-01 | -104.02 | 151.90 | 4.93E-01 | -24.58 | 14.44 | 8.87E-02 | 21.81  | 52.20 | 6.76E-01 |
| cg15418980 | 16.18  | 7.66  | 3.46E-02 | 18.59  | 14.18 | 1.90E-01 | 17.87   | 15.95  | 2.63E-01 | 12.02  | 12.50 | 3.36E-01 | 20.79  | 23.88 | 3.84E-01 |
| cg11229267 | -14.15 | 6.70  | 3.46E-02 | -17.11 | 12.60 | 1.74E-01 | -13.25  | 18.90  | 4.83E-01 | -7.00  | 5.80  | 2.27E-01 | -44.16 | 18.57 | 1.74E-02 |
| cg25685262 | 13.30  | 6.29  | 3.46E-02 | 9.47   | 9.60  | 3.24E-01 | 12.68   | 17.12  | 4.59E-01 | 24.13  | 20.87 | 2.47E-01 | 15.45  | 10.72 | 1.50E-01 |
| cg13236166 | -9.27  | 4.38  | 3.46E-02 | -17.94 | 7.82  | 2.19E-02 | -3.41   | 12.39  | 7.83E-01 | -7.32  | 6.71  | 2.75E-01 | -0.62  | 11.97 | 9.59E-01 |
| cg07791011 | 9.42   | 4.46  | 3.46E-02 | 5.26   | 6.65  | 4.29E-01 | 15.35   | 10.77  | 1.54E-01 | 27.00  | 16.42 | 1.00E-01 | 7.98   | 8.07  | 3.23E-01 |
| cg05855116 | 30.38  | 14.37 | 3.46E-02 | 22.54  | 19.84 | 2.56E-01 | 20.30   | 44.07  | 6.45E-01 | 26.96  | 41.66 | 5.18E-01 | 52.75  | 28.75 | 6.66E-02 |
| cg21759953 | -20.82 | 9.85  | 3.46E-02 | -28.81 | 16.17 | 7.47E-02 | -3.02   | 21.61  | 8.89E-01 | -27.81 | 20.71 | 1.79E-01 | -16.47 | 22.36 | 4.61E-01 |
| cg12593634 | -10.03 | 4.75  | 3.46E-02 | -16.14 | 8.15  | 4.77E-02 | -5.63   | 11.65  | 6.29E-01 | -8.04  | 8.68  | 3.54E-01 | -6.21  | 10.73 | 5.63E-01 |
| cg26189021 | -9.60  | 4.55  | 3.46E-02 | -14.38 | 6.77  | 3.36E-02 | -14.69  | 10.54  | 1.63E-01 | 5.42   | 14.30 | 7.05E-01 | -3.57  | 8.88  | 6.88E-01 |
| cg13865891 | 15.51  | 7.34  | 3.46E-02 | 17.38  | 14.22 | 2.22E-01 | -0.53   | 36.22  | 9.88E-01 | 19.42  | 9.49  | 4.07E-02 | -7.68  | 23.95 | 7.49E-01 |
| cg00739353 | 18.89  | 8.94  | 3.46E-02 | 25.32  | 12.82 | 4.83E-02 | 22.29   | 18.05  | 2.17E-01 | 0.83   | 26.44 | 9.75E-01 | 6.62   | 22.76 | 7.71E-01 |
| cg12666279 | 16.55  | 7.83  | 3.46E-02 | 28.57  | 9.40  | 2.37E-03 | 1.53    | 27.70  | 9.56E-01 | 22.36  | 14.68 | 1.28E-01 | 0.05   | 11.75 | 9.97E-01 |

|            |        |       |          |        |       |          |         |        |          |        |       |          |        |       |          |
|------------|--------|-------|----------|--------|-------|----------|---------|--------|----------|--------|-------|----------|--------|-------|----------|
| cg09078100 | 12.98  | 6.14  | 3.46E-02 | 5.02   | 15.74 | 7.50E-01 | 28.34   | 24.03  | 2.38E-01 | 7.00   | 5.78  | 2.26E-01 | 29.97  | 12.05 | 1.29E-02 |
| cg19422460 | 18.65  | 8.83  | 3.46E-02 | 27.59  | 13.53 | 4.14E-02 | 43.83   | 21.41  | 4.06E-02 | 4.85   | 8.14  | 5.51E-01 | 23.18  | 24.28 | 3.40E-01 |
| cg04738656 | 28.08  | 13.29 | 3.46E-02 | -25.58 | 38.28 | 5.04E-01 | 25.80   | 136.25 | 8.50E-01 | 37.27  | 14.87 | 1.22E-02 | 15.97  | 49.88 | 7.49E-01 |
| cg11754995 | 30.13  | 14.26 | 3.46E-02 | 56.78  | 36.57 | 1.20E-01 | -17.09  | 85.50  | 8.42E-01 | 31.99  | 16.69 | 5.53E-02 | -15.17 | 47.45 | 7.49E-01 |
| cg03091551 | 14.87  | 7.04  | 3.46E-02 | 18.27  | 11.92 | 1.25E-01 | 17.45   | 19.76  | 3.77E-01 | 15.52  | 16.78 | 3.55E-01 | 10.19  | 11.92 | 3.92E-01 |
| cg10699731 | 26.44  | 12.52 | 3.46E-02 | 37.49  | 22.30 | 9.28E-02 | 105.77  | 72.77  | 1.46E-01 | 29.40  | 16.56 | 7.58E-02 | -10.36 | 27.97 | 7.11E-01 |
| cg03116837 | -2.77  | 1.31  | 3.46E-02 | -4.09  | 1.96  | 3.67E-02 | -4.02   | 3.15   | 2.02E-01 | -0.91  | 2.80  | 7.46E-01 | -0.24  | 3.31  | 9.41E-01 |
| cg19279342 | 7.59   | 3.59  | 3.46E-02 | 0.63   | 6.26  | 9.19E-01 | 3.08    | 6.94   | 6.58E-01 | 15.75  | 6.08  | 9.55E-03 | 10.23  | 7.06  | 1.47E-01 |
| cg04928930 | 6.00   | 2.84  | 3.46E-02 | 5.80   | 3.64  | 1.11E-01 | 14.83   | 7.85   | 5.89E-02 | 2.85   | 7.92  | 7.19E-01 | 1.23   | 7.83  | 8.75E-01 |
| cg11721566 | -15.78 | 7.47  | 3.46E-02 | -19.55 | 11.60 | 9.18E-02 | 0.53    | 18.75  | 9.78E-01 | -25.62 | 16.61 | 1.23E-01 | -11.48 | 15.78 | 4.67E-01 |
| cg03776042 | 17.82  | 8.43  | 3.46E-02 | 19.16  | 17.35 | 2.70E-01 | 18.21   | 14.62  | 2.13E-01 | 11.06  | 16.99 | 5.15E-01 | 24.39  | 19.61 | 2.14E-01 |
| cg23404101 | -14.63 | 6.93  | 3.46E-02 | -7.11  | 13.53 | 5.99E-01 | -46.47  | 38.81  | 2.31E-01 | -12.81 | 8.89  | 1.49E-01 | -35.48 | 22.01 | 1.07E-01 |
| cg03936436 | 20.82  | 9.86  | 3.46E-02 | 14.16  | 19.76 | 4.74E-01 | 8.40    | 20.27  | 6.78E-01 | 35.91  | 15.70 | 2.22E-02 | 9.65   | 28.36 | 7.34E-01 |
| cg24149904 | 11.98  | 5.67  | 3.46E-02 | 15.98  | 8.53  | 6.11E-02 | 7.67    | 14.16  | 5.88E-01 | 13.74  | 12.64 | 2.77E-01 | 4.73   | 12.75 | 7.11E-01 |
| cg06230736 | 24.59  | 11.64 | 3.46E-02 | 21.90  | 17.53 | 2.12E-01 | 29.02   | 40.18  | 4.70E-01 | 29.08  | 27.21 | 2.85E-01 | 24.55  | 21.51 | 2.54E-01 |
| cg13580008 | -36.97 | 17.50 | 3.46E-02 | -42.19 | 21.18 | 4.64E-02 | -33.99  | 60.87  | 5.77E-01 | -24.22 | 63.02 | 7.01E-01 | -22.18 | 44.06 | 6.15E-01 |
| cg11659501 | 27.50  | 13.02 | 3.46E-02 | 42.95  | 11.76 | 2.59E-04 | 4.59    | 18.29  | 8.02E-01 | 60.67  | 20.86 | 3.64E-03 | 5.99   | 13.25 | 6.51E-01 |
| cg14345154 | 4.20   | 1.99  | 3.46E-02 | 4.20   | 2.87  | 1.43E-01 | 4.60    | 4.68   | 3.25E-01 | 4.38   | 4.02  | 2.76E-01 | 2.94   | 6.47  | 6.49E-01 |
| cg06651508 | 22.71  | 10.75 | 3.46E-02 | 57.09  | 21.28 | 7.29E-03 | 17.89   | 25.29  | 4.79E-01 | 11.11  | 9.53  | 2.44E-01 | 23.96  | 31.78 | 4.51E-01 |
| cg14584085 | -15.50 | 7.34  | 3.46E-02 | -7.46  | 15.86 | 6.38E-01 | -22.47  | 28.15  | 4.25E-01 | -17.91 | 9.35  | 5.54E-02 | -13.20 | 23.03 | 5.67E-01 |
| cg09901342 | 15.62  | 7.40  | 3.47E-02 | 20.16  | 9.83  | 4.02E-02 | 20.26   | 20.02  | 3.12E-01 | 17.80  | 31.43 | 5.71E-01 | 1.86   | 15.05 | 9.02E-01 |
| cg05398773 | 26.02  | 12.32 | 3.47E-02 | 38.18  | 30.68 | 2.13E-01 | 12.14   | 88.50  | 8.91E-01 | 23.63  | 14.36 | 9.98E-02 | 26.78  | 42.56 | 5.29E-01 |
| cg05035508 | 14.46  | 6.85  | 3.47E-02 | 16.66  | 17.43 | 3.39E-01 | 17.00   | 18.90  | 3.68E-01 | 14.60  | 8.64  | 9.09E-02 | 5.61   | 23.36 | 8.10E-01 |
| cg16554447 | -7.47  | 3.54  | 3.47E-02 | -8.25  | 7.10  | 2.45E-01 | 3.24    | 11.84  | 7.85E-01 | -7.93  | 4.93  | 1.08E-01 | -11.08 | 9.24  | 2.30E-01 |
| cg25010771 | -41.63 | 19.71 | 3.47E-02 | -14.52 | 28.93 | 6.16E-01 | -11.21  | 69.31  | 8.72E-01 | -79.13 | 38.92 | 4.20E-02 | -68.99 | 44.25 | 1.19E-01 |
| cg13911501 | 13.18  | 6.24  | 3.47E-02 | 18.88  | 9.98  | 5.86E-02 | -0.45   | 8.52   | 9.58E-01 | 20.03  | 14.02 | 1.53E-01 | 24.83  | 13.35 | 6.28E-02 |
| cg20165459 | 39.14  | 18.53 | 3.47E-02 | 52.74  | 24.36 | 3.04E-02 | 67.49   | 32.47  | 3.77E-02 | 5.52   | 10.23 | 5.90E-01 | 62.19  | 32.86 | 5.84E-02 |
| cg04700283 | 17.92  | 8.48  | 3.47E-02 | 16.87  | 27.03 | 5.33E-01 | -101.85 | 88.00  | 2.47E-01 | 20.84  | 9.29  | 2.48E-02 | -3.21  | 35.24 | 9.27E-01 |
| cg13997278 | -19.52 | 9.24  | 3.47E-02 | -22.27 | 12.25 | 6.90E-02 | 4.71    | 57.93  | 9.35E-01 | -30.31 | 16.67 | 6.90E-02 | 24.25  | 29.61 | 4.13E-01 |
| cg04680150 | 16.38  | 7.76  | 3.47E-02 | 11.75  | 17.89 | 5.11E-01 | -6.94   | 21.29  | 7.44E-01 | 21.75  | 10.55 | 3.92E-02 | 24.05  | 20.83 | 2.48E-01 |
| cg18201077 | 38.49  | 18.23 | 3.47E-02 | 42.28  | 21.88 | 5.33E-02 | 45.33   | 80.88  | 5.75E-01 | -20.92 | 69.94 | 7.65E-01 | 44.13  | 42.08 | 2.94E-01 |
| cg21242663 | 16.77  | 7.94  | 3.47E-02 | 12.94  | 22.22 | 5.60E-01 | 3.11    | 25.50  | 9.03E-01 | 17.88  | 9.40  | 5.71E-02 | 33.26  | 31.96 | 2.98E-01 |
| cg24446009 | 13.29  | 6.30  | 3.47E-02 | 2.34   | 16.41 | 8.86E-01 | 21.56   | 23.99  | 3.69E-01 | 13.13  | 7.32  | 7.29E-02 | 39.08  | 29.65 | 1.87E-01 |
| cg07938869 | 19.52  | 9.24  | 3.47E-02 | -1.84  | 23.31 | 9.37E-01 | 9.61    | 54.26  | 8.59E-01 | 22.60  | 10.95 | 3.91E-02 | 33.71  | 28.90 | 2.43E-01 |
| cg26726006 | 8.81   | 4.17  | 3.47E-02 | 12.56  | 4.75  | 8.26E-03 | 1.11    | 8.32   | 8.93E-01 | 24.33  | 11.88 | 4.06E-02 | 2.44   | 6.71  | 7.16E-01 |

|            |        |       |          |        |       |          |        |        |          |        |       |          |        |       |          |
|------------|--------|-------|----------|--------|-------|----------|--------|--------|----------|--------|-------|----------|--------|-------|----------|
| cg08233142 | 30.62  | 14.50 | 3.47E-02 | 22.96  | 40.69 | 5.72E-01 | 183.46 | 161.54 | 2.56E-01 | 30.07  | 16.38 | 6.64E-02 | 32.71  | 50.82 | 5.20E-01 |
| cg03668539 | 15.09  | 7.15  | 3.47E-02 | 11.20  | 18.52 | 5.45E-01 | -7.61  | 25.67  | 7.67E-01 | 18.75  | 8.50  | 2.75E-02 | 11.49  | 27.62 | 6.77E-01 |
| cg07159875 | 13.00  | 6.16  | 3.47E-02 | 14.17  | 9.03  | 1.17E-01 | -2.03  | 13.53  | 8.81E-01 | 17.47  | 14.61 | 2.32E-01 | 24.74  | 15.83 | 1.18E-01 |
| cg12004641 | -10.77 | 5.10  | 3.47E-02 | -18.47 | 7.52  | 1.40E-02 | 2.12   | 11.83  | 8.58E-01 | -8.90  | 12.86 | 4.89E-01 | -6.42  | 11.48 | 5.76E-01 |
| cg02072875 | -7.51  | 3.56  | 3.47E-02 | -8.50  | 7.23  | 2.40E-01 | 13.19  | 19.81  | 5.06E-01 | -6.37  | 4.56  | 1.62E-01 | -17.30 | 10.47 | 9.84E-02 |
| cg02709432 | -19.28 | 9.13  | 3.47E-02 | -21.87 | 11.89 | 6.59E-02 | 24.79  | 31.21  | 4.27E-01 | -15.09 | 41.50 | 7.16E-01 | -28.09 | 17.34 | 1.05E-01 |
| cg21663916 | -8.74  | 4.14  | 3.47E-02 | -20.16 | 8.57  | 1.86E-02 | -2.87  | 8.33   | 7.31E-01 | -7.39  | 7.12  | 3.00E-01 | -4.57  | 9.69  | 6.37E-01 |
| cg26072930 | 12.06  | 5.71  | 3.47E-02 | 8.90   | 14.86 | 5.49E-01 | 30.65  | 17.43  | 7.87E-02 | 12.80  | 7.40  | 8.35E-02 | -1.16  | 14.78 | 9.37E-01 |
| cg14838970 | 8.37   | 3.97  | 3.47E-02 | 15.11  | 5.65  | 7.51E-03 | 2.22   | 8.61   | 7.96E-01 | 9.28   | 9.83  | 3.45E-01 | -1.34  | 8.79  | 8.79E-01 |
| cg14906103 | 7.14   | 3.38  | 3.47E-02 | 5.06   | 5.45  | 3.53E-01 | 10.04  | 8.04   | 2.12E-01 | 7.98   | 6.04  | 1.86E-01 | 7.28   | 9.52  | 4.44E-01 |
| cg04250847 | 21.78  | 10.31 | 3.47E-02 | 22.57  | 14.44 | 1.18E-01 | 10.59  | 29.58  | 7.20E-01 | 67.66  | 30.43 | 2.62E-02 | 6.30   | 19.43 | 7.46E-01 |
| cg03169242 | -16.34 | 7.74  | 3.47E-02 | -20.91 | 11.56 | 7.04E-02 | -15.16 | 16.45  | 3.57E-01 | -6.69  | 20.19 | 7.40E-01 | -14.31 | 18.05 | 4.28E-01 |
| cg00334274 | -9.27  | 4.39  | 3.47E-02 | -10.00 | 6.83  | 1.43E-01 | -9.66  | 11.32  | 3.94E-01 | -16.35 | 9.46  | 8.39E-02 | -0.73  | 9.34  | 9.37E-01 |
| cg27421105 | 8.68   | 4.11  | 3.47E-02 | 5.15   | 6.32  | 4.16E-01 | 5.78   | 8.03   | 4.71E-01 | 22.26  | 12.14 | 6.67E-02 | 12.13  | 9.17  | 1.86E-01 |
| cg17591343 | -24.31 | 11.51 | 3.47E-02 | -22.39 | 13.18 | 8.95E-02 | -57.83 | 42.59  | 1.75E-01 | -47.97 | 66.73 | 4.72E-01 | -11.77 | 31.37 | 7.08E-01 |
| cg08989558 | 17.78  | 8.42  | 3.47E-02 | 19.58  | 20.73 | 3.45E-01 | 19.27  | 17.35  | 2.67E-01 | 21.51  | 12.08 | 7.49E-02 | -3.93  | 24.98 | 8.75E-01 |
| cg18806378 | 17.19  | 8.14  | 3.47E-02 | 8.51   | 20.39 | 6.76E-01 | -9.10  | 65.62  | 8.90E-01 | 21.12  | 9.85  | 3.20E-02 | 10.87  | 21.62 | 6.15E-01 |
| cg18107006 | 5.66   | 2.68  | 3.47E-02 | 3.63   | 3.61  | 3.15E-01 | 10.33  | 6.60   | 1.17E-01 | 14.17  | 7.34  | 5.34E-02 | 0.41   | 6.92  | 9.53E-01 |
| cg06431105 | -35.62 | 16.87 | 3.47E-02 | -26.89 | 21.48 | 2.11E-01 | 31.61  | 54.42  | 5.61E-01 | -86.80 | 43.08 | 4.39E-02 | -48.15 | 31.72 | 1.29E-01 |
| cg23496571 | -13.66 | 6.47  | 3.47E-02 | -16.98 | 11.81 | 1.50E-01 | -5.69  | 15.59  | 7.15E-01 | -13.96 | 11.66 | 2.31E-01 | -14.97 | 13.82 | 2.79E-01 |
| cg27364780 | 12.33  | 5.84  | 3.47E-02 | 14.28  | 14.37 | 3.20E-01 | 11.75  | 22.44  | 6.01E-01 | 14.12  | 7.04  | 4.50E-02 | -6.61  | 20.67 | 7.49E-01 |
| cg26157802 | 18.93  | 8.97  | 3.48E-02 | 33.51  | 29.84 | 2.61E-01 | -72.51 | 95.44  | 4.47E-01 | 19.52  | 9.74  | 4.51E-02 | 0.06   | 38.90 | 9.99E-01 |
| cg10315334 | -9.44  | 4.47  | 3.48E-02 | -9.76  | 6.61  | 1.40E-01 | -16.75 | 10.96  | 1.27E-01 | 0.28   | 10.95 | 9.79E-01 | -10.65 | 9.76  | 2.75E-01 |
| cg19092343 | -11.49 | 5.44  | 3.48E-02 | -15.97 | 9.33  | 8.71E-02 | -15.44 | 16.68  | 3.55E-01 | -2.44  | 6.29  | 6.98E-01 | -25.81 | 11.80 | 2.87E-02 |
| cg24186249 | -15.85 | 7.51  | 3.48E-02 | -14.15 | 20.65 | 4.93E-01 | -7.82  | 36.36  | 8.30E-01 | -14.88 | 8.63  | 8.47E-02 | -34.60 | 28.56 | 2.26E-01 |
| cg18864857 | -8.94  | 4.24  | 3.48E-02 | -9.55  | 6.56  | 1.46E-01 | -17.82 | 17.26  | 3.02E-01 | -13.38 | 6.83  | 5.00E-02 | 7.85   | 11.02 | 4.76E-01 |
| cg23106045 | -4.21  | 2.00  | 3.48E-02 | -3.05  | 2.91  | 2.95E-01 | -8.37  | 5.01   | 9.52E-02 | -4.52  | 5.62  | 4.21E-01 | -3.61  | 4.03  | 3.71E-01 |
| cg03763616 | 10.10  | 4.78  | 3.48E-02 | 12.40  | 6.74  | 6.57E-02 | 20.15  | 11.02  | 6.75E-02 | 4.10   | 13.00 | 7.52E-01 | -2.94  | 11.53 | 7.99E-01 |
| cg17079497 | -11.51 | 5.45  | 3.48E-02 | -3.95  | 11.80 | 7.38E-01 | -22.87 | 16.73  | 1.72E-01 | -9.47  | 7.44  | 2.03E-01 | -21.99 | 14.40 | 1.27E-01 |
| cg18328190 | 22.30  | 10.56 | 3.48E-02 | 29.54  | 16.47 | 7.28E-02 | 51.42  | 22.09  | 1.99E-02 | 5.73   | 7.20  | 4.26E-01 | 28.14  | 22.65 | 2.14E-01 |
| cg13413955 | 12.15  | 5.75  | 3.48E-02 | 14.23  | 9.92  | 1.52E-01 | 18.39  | 12.90  | 1.54E-01 | 5.99   | 13.91 | 6.67E-01 | 9.12   | 10.62 | 3.90E-01 |
| cg26208644 | -20.10 | 9.52  | 3.48E-02 | 2.69   | 25.84 | 9.17E-01 | -67.90 | 39.94  | 8.91E-02 | -22.39 | 11.16 | 4.47E-02 | -3.69  | 33.95 | 9.13E-01 |
| cg05249479 | 17.77  | 8.42  | 3.48E-02 | 15.01  | 10.59 | 1.56E-01 | 40.39  | 27.64  | 1.44E-01 | 50.97  | 35.57 | 1.52E-01 | 7.66   | 17.99 | 6.70E-01 |
| cg14201324 | 12.22  | 5.79  | 3.48E-02 | 2.49   | 14.50 | 8.63E-01 | 47.82  | 27.04  | 7.70E-02 | 14.07  | 7.36  | 5.58E-02 | 5.24   | 13.81 | 7.04E-01 |
| cg14829606 | 26.22  | 12.42 | 3.48E-02 | 35.91  | 18.16 | 4.80E-02 | 38.73  | 29.05  | 1.83E-01 | -19.46 | 41.74 | 6.41E-01 | 15.58  | 24.33 | 5.22E-01 |

|            |        |       |          |        |       |          |        |        |          |         |       |          |        |       |          |
|------------|--------|-------|----------|--------|-------|----------|--------|--------|----------|---------|-------|----------|--------|-------|----------|
| cg23893460 | 15.63  | 7.41  | 3.48E-02 | 12.22  | 10.66 | 2.52E-01 | 23.82  | 14.37  | 9.75E-02 | -0.06   | 22.07 | 9.98E-01 | 24.50  | 19.81 | 2.16E-01 |
| cg23300897 | -29.84 | 14.14 | 3.48E-02 | -38.25 | 16.52 | 2.06E-02 | -21.66 | 46.93  | 6.44E-01 | -27.51  | 52.75 | 6.02E-01 | 20.15  | 43.64 | 6.44E-01 |
| cg19687230 | 9.39   | 4.45  | 3.48E-02 | 10.23  | 6.13  | 9.53E-02 | 15.63  | 10.42  | 1.33E-01 | -2.26   | 14.63 | 8.77E-01 | 6.86   | 9.98  | 4.92E-01 |
| cg26365742 | 17.89  | 8.48  | 3.48E-02 | 18.34  | 11.05 | 9.69E-02 | -6.75  | 35.21  | 8.48E-01 | 47.47   | 36.60 | 1.95E-01 | 16.48  | 15.48 | 2.87E-01 |
| cg10089865 | 11.71  | 5.55  | 3.48E-02 | 16.91  | 16.77 | 3.13E-01 | -23.88 | 29.76  | 4.22E-01 | 12.27   | 6.29  | 5.12E-02 | 14.68  | 19.83 | 4.59E-01 |
| cg24435669 | -9.44  | 4.47  | 3.48E-02 | -11.32 | 6.72  | 9.21E-02 | -7.30  | 8.99   | 4.16E-01 | -2.10   | 13.74 | 8.79E-01 | -11.76 | 9.91  | 2.35E-01 |
| cg09999984 | -12.01 | 5.69  | 3.48E-02 | -19.27 | 12.36 | 1.19E-01 | 0.35   | 16.72  | 9.83E-01 | -17.96  | 7.54  | 1.72E-02 | 4.74   | 13.03 | 7.16E-01 |
| cg22022881 | -3.48  | 1.65  | 3.48E-02 | -3.14  | 2.28  | 1.69E-01 | -2.12  | 3.86   | 5.82E-01 | -0.22   | 4.54  | 9.61E-01 | -8.84  | 4.11  | 3.17E-02 |
| cg07011231 | -17.89 | 8.48  | 3.48E-02 | -27.82 | 18.96 | 1.42E-01 | -56.29 | 39.32  | 1.52E-01 | -14.32  | 10.46 | 1.71E-01 | -3.25  | 27.16 | 9.05E-01 |
| cg09240793 | -7.18  | 3.40  | 3.48E-02 | -9.77  | 5.46  | 7.36E-02 | -6.66  | 7.70   | 3.87E-01 | -7.33   | 6.40  | 2.52E-01 | -0.09  | 9.32  | 9.93E-01 |
| cg22151113 | 26.72  | 12.66 | 3.48E-02 | 21.43  | 18.84 | 2.55E-01 | 11.82  | 25.54  | 6.43E-01 | 58.92   | 35.47 | 9.67E-02 | 37.86  | 30.27 | 2.11E-01 |
| cg05174975 | -10.35 | 4.90  | 3.48E-02 | -10.42 | 7.31  | 1.54E-01 | -3.65  | 13.82  | 7.91E-01 | -4.67   | 10.93 | 6.69E-01 | -19.08 | 10.37 | 6.59E-02 |
| cg14899164 | -69.70 | 33.03 | 3.48E-02 | -52.19 | 42.94 | 2.24E-01 | 41.32  | 149.08 | 7.82E-01 | -145.67 | 85.30 | 8.77E-02 | -90.81 | 72.19 | 2.08E-01 |
| cg26852159 | 16.32  | 7.73  | 3.48E-02 | 27.25  | 16.74 | 1.03E-01 | -0.56  | 32.01  | 9.86E-01 | 11.10   | 9.41  | 2.38E-01 | 57.93  | 33.79 | 8.64E-02 |
| cg03340303 | -11.65 | 5.52  | 3.48E-02 | 18.07  | 20.98 | 3.89E-01 | -14.56 | 7.23   | 4.40E-02 | -12.89  | 9.76  | 1.87E-01 | -10.37 | 33.00 | 7.53E-01 |
| cg16688582 | -10.38 | 4.92  | 3.48E-02 | -4.58  | 13.64 | 7.37E-01 | 12.13  | 23.22  | 6.01E-01 | -10.71  | 5.63  | 5.71E-02 | -34.85 | 19.79 | 7.83E-02 |
| cg16885235 | -9.59  | 4.55  | 3.48E-02 | -9.33  | 10.84 | 3.89E-01 | -5.64  | 20.06  | 7.79E-01 | -10.44  | 5.48  | 5.67E-02 | -5.64  | 15.62 | 7.18E-01 |
| cg16803791 | 23.09  | 10.94 | 3.48E-02 | 34.77  | 18.63 | 6.19E-02 | -1.72  | 37.24  | 9.63E-01 | 31.65   | 20.16 | 1.16E-01 | 7.01   | 20.88 | 7.37E-01 |
| cg16643542 | 5.61   | 2.66  | 3.48E-02 | 4.53   | 3.10  | 1.44E-01 | 10.02  | 7.03   | 1.54E-01 | 6.62    | 11.18 | 5.54E-01 | 7.29   | 10.47 | 4.86E-01 |
| cg24654264 | 17.34  | 8.22  | 3.48E-02 | 32.60  | 11.21 | 3.65E-03 | 19.77  | 19.46  | 3.10E-01 | 15.88   | 24.43 | 5.16E-01 | 2.16   | 10.85 | 8.42E-01 |
| cg26889552 | 14.42  | 6.83  | 3.48E-02 | 16.97  | 16.73 | 3.10E-01 | 24.10  | 17.42  | 1.67E-01 | 10.18   | 8.73  | 2.43E-01 | 24.81  | 26.60 | 3.51E-01 |
| cg27389255 | 9.99   | 4.73  | 3.48E-02 | 8.63   | 7.41  | 2.44E-01 | 14.52  | 11.11  | 1.91E-01 | 12.64   | 8.75  | 1.49E-01 | 1.16   | 13.78 | 9.33E-01 |
| cg08713474 | 13.04  | 6.18  | 3.48E-02 | 17.95  | 14.72 | 2.23E-01 | 8.87   | 21.27  | 6.76E-01 | 8.55    | 7.77  | 2.71E-01 | 34.57  | 18.82 | 6.62E-02 |
| cg23401756 | 9.73   | 4.61  | 3.48E-02 | 11.64  | 7.84  | 1.38E-01 | 9.22   | 9.18   | 3.15E-01 | 16.30   | 10.93 | 1.36E-01 | 2.15   | 9.72  | 8.25E-01 |
| cg04428139 | 9.62   | 4.56  | 3.48E-02 | 12.99  | 6.71  | 5.27E-02 | 16.60  | 10.94  | 1.29E-01 | 18.02   | 17.04 | 2.90E-01 | -1.89  | 8.42  | 8.22E-01 |
| cg20864608 | 29.33  | 13.90 | 3.48E-02 | 59.46  | 44.49 | 1.81E-01 | 61.27  | 169.02 | 7.17E-01 | 23.82   | 15.31 | 1.20E-01 | 48.62  | 51.93 | 3.49E-01 |
| cg26267678 | 23.52  | 11.15 | 3.48E-02 | 39.56  | 17.26 | 2.19E-02 | 53.84  | 35.37  | 1.28E-01 | 7.15    | 26.58 | 7.88E-01 | 3.52   | 19.12 | 8.54E-01 |
| cg09694921 | 14.67  | 6.95  | 3.48E-02 | 11.96  | 10.84 | 2.70E-01 | 12.97  | 13.70  | 3.44E-01 | 10.19   | 17.72 | 5.65E-01 | 27.42  | 16.56 | 9.77E-02 |
| cg08277287 | 11.36  | 5.38  | 3.49E-02 | 3.91   | 14.48 | 7.87E-01 | 35.81  | 18.45  | 5.23E-02 | 10.01   | 6.46  | 1.21E-01 | 9.92   | 18.69 | 5.96E-01 |
| cg00968021 | 18.13  | 8.59  | 3.49E-02 | 33.16  | 18.32 | 7.03E-02 | 117.26 | 78.03  | 1.33E-01 | 14.04   | 11.61 | 2.26E-01 | 7.81   | 18.34 | 6.70E-01 |
| cg16655795 | 10.48  | 4.97  | 3.49E-02 | 6.20   | 6.44  | 3.36E-01 | 27.61  | 10.96  | 1.17E-02 | 5.23    | 16.18 | 7.46E-01 | 6.73   | 12.57 | 5.93E-01 |
| cg24934063 | 18.67  | 8.85  | 3.49E-02 | 5.98   | 26.94 | 8.24E-01 | 22.72  | 40.35  | 5.73E-01 | 25.37   | 11.00 | 2.11E-02 | 2.65   | 19.94 | 8.94E-01 |
| cg27505440 | -9.79  | 4.64  | 3.49E-02 | -15.16 | 9.22  | 1.00E-01 | -8.03  | 10.75  | 4.55E-01 | -11.75  | 6.79  | 8.35E-02 | 11.04  | 15.17 | 4.67E-01 |
| cg16340767 | 11.14  | 5.28  | 3.49E-02 | 6.34   | 6.83  | 3.53E-01 | 24.30  | 14.57  | 9.54E-02 | 18.30   | 15.74 | 2.45E-01 | 13.24  | 13.26 | 3.18E-01 |
| cg10217202 | 7.72   | 3.66  | 3.49E-02 | 10.29  | 7.19  | 1.53E-01 | 5.10   | 8.47   | 5.47E-01 | 6.54    | 5.91  | 2.68E-01 | 9.33   | 8.85  | 2.92E-01 |

|            |        |       |          |        |       |          |         |        |          |        |        |          |        |       |          |
|------------|--------|-------|----------|--------|-------|----------|---------|--------|----------|--------|--------|----------|--------|-------|----------|
| cg25948831 | 13.50  | 6.40  | 3.49E-02 | 12.31  | 12.11 | 3.09E-01 | -3.85   | 15.47  | 8.04E-01 | 20.79  | 9.51   | 2.88E-02 | 13.53  | 20.58 | 5.11E-01 |
| cg17165284 | -41.56 | 19.70 | 3.49E-02 | -57.20 | 49.66 | 2.49E-01 | -184.71 | 210.29 | 3.80E-01 | -31.03 | 22.72  | 1.72E-01 | -92.88 | 68.84 | 1.77E-01 |
| cg05448404 | 6.16   | 2.92  | 3.49E-02 | 3.80   | 4.09  | 3.53E-01 | 11.26   | 6.19   | 6.88E-02 | -3.13  | 15.28  | 8.38E-01 | 7.92   | 6.07  | 1.92E-01 |
| cg12511310 | -13.54 | 6.42  | 3.49E-02 | -6.92  | 16.59 | 6.77E-01 | -0.03   | 23.82  | 9.99E-01 | -13.16 | 7.58   | 8.25E-02 | -50.19 | 25.96 | 5.32E-02 |
| cg19925035 | 18.99  | 9.00  | 3.49E-02 | 10.83  | 17.84 | 5.44E-01 | -8.14   | 43.46  | 8.51E-01 | 24.27  | 11.79  | 3.96E-02 | 20.37  | 25.99 | 4.33E-01 |
| cg01574673 | 16.93  | 8.02  | 3.49E-02 | 8.61   | 11.76 | 4.64E-01 | 42.01   | 21.47  | 5.04E-02 | 24.71  | 24.48  | 3.13E-01 | 15.30  | 14.96 | 3.06E-01 |
| cg16026501 | 18.38  | 8.71  | 3.49E-02 | 23.58  | 18.09 | 1.92E-01 | 6.56    | 19.53  | 7.37E-01 | 13.05  | 13.08  | 3.18E-01 | 46.39  | 24.62 | 5.95E-02 |
| cg01901434 | -8.58  | 4.07  | 3.49E-02 | -7.57  | 8.08  | 3.49E-01 | -2.56   | 13.33  | 8.48E-01 | -9.67  | 5.56   | 8.21E-02 | -10.52 | 11.76 | 3.71E-01 |
| cg16250145 | -13.82 | 6.55  | 3.49E-02 | -25.30 | 11.79 | 3.19E-02 | -26.28  | 21.45  | 2.21E-01 | -8.58  | 9.68   | 3.76E-01 | 2.60   | 17.47 | 8.82E-01 |
| cg06193043 | -5.83  | 2.76  | 3.49E-02 | -3.28  | 3.95  | 4.07E-01 | -3.00   | 5.97   | 6.16E-01 | -16.65 | 8.56   | 5.17E-02 | -9.61  | 6.30  | 1.27E-01 |
| cg11590282 | 10.85  | 5.15  | 3.49E-02 | 13.83  | 6.34  | 2.91E-02 | 0.84    | 8.55   | 9.21E-01 | -2.06  | 17.48  | 9.06E-01 | 24.13  | 10.75 | 2.48E-02 |
| cg04714088 | -45.25 | 21.45 | 3.49E-02 | -7.77  | 52.41 | 8.82E-01 | -0.15   | 181.88 | 9.99E-01 | -54.22 | 25.16  | 3.11E-02 | -49.44 | 70.88 | 4.86E-01 |
| cg06853894 | 8.68   | 4.11  | 3.49E-02 | 8.22   | 5.20  | 1.14E-01 | 20.98   | 9.65   | 2.97E-02 | -2.21  | 16.42  | 8.93E-01 | -1.09  | 11.44 | 9.24E-01 |
| cg26353296 | 23.01  | 10.91 | 3.49E-02 | 22.09  | 14.13 | 1.18E-01 | 32.70   | 57.89  | 5.72E-01 | 86.02  | 66.13  | 1.93E-01 | 18.58  | 18.68 | 3.20E-01 |
| cg04316231 | 22.69  | 10.76 | 3.49E-02 | 4.99   | 19.09 | 7.94E-01 | 22.04   | 19.37  | 2.55E-01 | 35.75  | 24.05  | 1.37E-01 | 41.19  | 25.81 | 1.11E-01 |
| cg23610053 | 10.70  | 5.07  | 3.49E-02 | 14.12  | 12.53 | 2.60E-01 | -1.16   | 39.70  | 9.77E-01 | 12.67  | 5.96   | 3.37E-02 | -7.84  | 16.33 | 6.31E-01 |
| cg15221831 | 99.67  | 47.25 | 3.49E-02 | 120.02 | 68.91 | 8.16E-02 | 251.24  | 227.02 | 2.68E-01 | -60.48 | 117.85 | 6.08E-01 | 129.16 | 82.78 | 1.19E-01 |
| cg09459719 | 11.86  | 5.62  | 3.49E-02 | 12.34  | 14.01 | 3.78E-01 | 25.08   | 42.52  | 5.55E-01 | 11.91  | 6.70   | 7.54E-02 | 8.91   | 16.43 | 5.87E-01 |
| cg03849707 | 17.92  | 8.50  | 3.49E-02 | 16.06  | 14.69 | 2.74E-01 | 16.32   | 17.34  | 3.47E-01 | 13.37  | 16.95  | 4.30E-01 | 30.26  | 20.36 | 1.37E-01 |
| cg05041351 | 17.32  | 8.21  | 3.49E-02 | 47.96  | 20.97 | 2.22E-02 | 0.24    | 33.45  | 9.94E-01 | 16.26  | 10.01  | 1.04E-01 | 1.75   | 18.66 | 9.25E-01 |
| cg02698886 | 7.63   | 3.62  | 3.49E-02 | 5.24   | 5.34  | 3.27E-01 | 7.78    | 9.22   | 3.99E-01 | 15.58  | 7.08   | 2.78E-02 | -0.34  | 10.21 | 9.74E-01 |
| cg14321708 | 18.35  | 8.70  | 3.49E-02 | 11.65  | 14.63 | 4.26E-01 | 26.42   | 16.57  | 1.11E-01 | 7.03   | 18.78  | 7.08E-01 | 34.91  | 22.05 | 1.13E-01 |
| cg04953958 | 11.56  | 5.48  | 3.49E-02 | 9.37   | 7.61  | 2.18E-01 | 6.15    | 10.98  | 5.76E-01 | 26.18  | 18.77  | 1.63E-01 | 20.06  | 14.35 | 1.62E-01 |
| cg06799756 | 15.83  | 7.51  | 3.49E-02 | 17.39  | 17.30 | 3.15E-01 | 18.61   | 19.60  | 3.42E-01 | 15.48  | 9.74   | 1.12E-01 | 8.91   | 28.30 | 7.53E-01 |
| cg08224208 | 15.10  | 7.16  | 3.49E-02 | 7.81   | 13.48 | 5.62E-01 | 8.68    | 28.36  | 7.60E-01 | 16.53  | 10.29  | 1.08E-01 | 25.53  | 17.37 | 1.42E-01 |
| cg07596209 | 34.40  | 16.31 | 3.49E-02 | 16.66  | 52.96 | 7.53E-01 | -128.24 | 222.97 | 5.65E-01 | 42.68  | 17.98  | 1.76E-02 | -21.24 | 58.86 | 7.18E-01 |
| cg17364411 | 15.64  | 7.42  | 3.50E-02 | 25.85  | 14.12 | 6.72E-02 | 0.16    | 17.35  | 9.93E-01 | 18.81  | 11.41  | 9.93E-02 | 4.51   | 21.50 | 8.34E-01 |
| cg21380560 | 21.33  | 10.11 | 3.50E-02 | 26.99  | 14.10 | 5.56E-02 | 16.77   | 34.23  | 6.24E-01 | 33.02  | 35.33  | 3.50E-01 | 10.34  | 17.98 | 5.65E-01 |
| cg21547649 | 7.25   | 3.44  | 3.50E-02 | 6.87   | 4.61  | 1.36E-01 | 10.38   | 7.48   | 1.65E-01 | 16.16  | 12.24  | 1.87E-01 | -0.26  | 8.79  | 9.76E-01 |
| cg24306982 | 16.83  | 7.98  | 3.50E-02 | 25.97  | 15.83 | 1.01E-01 | 7.80    | 18.51  | 6.74E-01 | 13.01  | 17.49  | 4.57E-01 | 17.25  | 13.45 | 2.00E-01 |
| cg21784940 | 8.54   | 4.05  | 3.50E-02 | 9.96   | 7.99  | 2.13E-01 | 17.73   | 9.92   | 7.39E-02 | 7.87   | 5.77   | 1.73E-01 | -10.23 | 14.03 | 4.66E-01 |
| cg27320734 | -22.53 | 10.69 | 3.50E-02 | -30.00 | 18.06 | 9.67E-02 | 20.92   | 30.62  | 4.94E-01 | -34.47 | 20.41  | 9.13E-02 | -20.20 | 21.19 | 3.41E-01 |
| cg22218588 | 14.77  | 7.00  | 3.50E-02 | 6.52   | 19.43 | 7.37E-01 | 26.51   | 31.11  | 3.94E-01 | 16.85  | 8.22   | 4.05E-02 | 3.78   | 22.85 | 8.69E-01 |
| cg20185945 | -10.76 | 5.10  | 3.50E-02 | -15.60 | 13.53 | 2.49E-01 | -29.11  | 17.16  | 8.98E-02 | -5.90  | 6.27   | 3.47E-01 | -18.99 | 15.46 | 2.19E-01 |
| cg03056614 | 19.65  | 9.32  | 3.50E-02 | 32.67  | 16.80 | 5.18E-02 | 26.34   | 23.25  | 2.57E-01 | 5.90   | 14.87  | 6.92E-01 | 22.02  | 25.06 | 3.80E-01 |

|            |        |       |          |        |       |          |         |        |          |         |       |          |        |       |          |
|------------|--------|-------|----------|--------|-------|----------|---------|--------|----------|---------|-------|----------|--------|-------|----------|
| cg14435092 | 37.19  | 17.64 | 3.50E-02 | -31.53 | 44.30 | 4.77E-01 | 16.11   | 228.01 | 9.44E-01 | 45.03   | 17.07 | 8.34E-03 | 75.58  | 49.47 | 1.27E-01 |
| cg18275620 | -13.41 | 6.36  | 3.50E-02 | -13.13 | 13.58 | 3.33E-01 | -0.08   | 17.29  | 9.96E-01 | -15.62  | 8.70  | 7.26E-02 | -19.58 | 19.10 | 3.05E-01 |
| cg15727564 | 47.10  | 22.34 | 3.50E-02 | 27.19  | 57.05 | 6.34E-01 | -8.27   | 270.33 | 9.76E-01 | 57.47   | 25.81 | 2.60E-02 | -0.64  | 74.09 | 9.93E-01 |
| cg21917866 | 12.12  | 5.75  | 3.50E-02 | 11.81  | 10.76 | 2.73E-01 | 4.05    | 12.71  | 7.50E-01 | 12.69   | 11.76 | 2.80E-01 | 18.04  | 11.05 | 1.02E-01 |
| cg14673319 | 18.11  | 8.59  | 3.50E-02 | 44.93  | 22.47 | 4.56E-02 | 36.48   | 42.59  | 3.92E-01 | 9.50    | 9.47  | 3.16E-01 | 43.13  | 31.73 | 1.74E-01 |
| cg23731836 | 31.06  | 14.73 | 3.50E-02 | 34.95  | 17.99 | 5.20E-02 | 99.27   | 105.59 | 3.47E-01 | 72.21   | 49.78 | 1.47E-01 | -2.90  | 31.26 | 9.26E-01 |
| cg06079509 | -12.95 | 6.14  | 3.50E-02 | -21.90 | 10.52 | 3.74E-02 | -1.80   | 12.64  | 8.87E-01 | -13.44  | 12.99 | 3.01E-01 | -10.30 | 13.73 | 4.53E-01 |
| cg25220537 | -8.37  | 3.97  | 3.50E-02 | -14.58 | 7.50  | 5.18E-02 | -1.28   | 8.20   | 8.76E-01 | -9.73   | 6.50  | 1.34E-01 | -3.15  | 11.88 | 7.91E-01 |
| cg24702451 | 21.61  | 10.25 | 3.50E-02 | 32.95  | 18.87 | 8.07E-02 | 10.93   | 20.92  | 6.01E-01 | 21.49   | 18.86 | 2.55E-01 | 17.18  | 24.87 | 4.90E-01 |
| cg24084606 | -11.37 | 5.39  | 3.50E-02 | -13.22 | 10.03 | 1.88E-01 | 3.43    | 11.55  | 7.67E-01 | -14.86  | 9.00  | 9.89E-02 | -22.12 | 14.73 | 1.33E-01 |
| cg23519155 | -12.57 | 5.96  | 3.50E-02 | -16.63 | 9.60  | 8.30E-02 | -8.36   | 12.83  | 5.15E-01 | 5.05    | 13.91 | 7.17E-01 | -24.66 | 12.90 | 5.60E-02 |
| cg12998599 | 13.95  | 6.62  | 3.50E-02 | 27.04  | 15.40 | 7.90E-02 | 26.21   | 28.99  | 3.66E-01 | 12.69   | 7.95  | 1.10E-01 | -17.24 | 25.00 | 4.90E-01 |
| cg16326902 | 17.32  | 8.22  | 3.50E-02 | 3.69   | 12.90 | 7.75E-01 | 37.82   | 14.14  | 7.47E-03 | 8.96    | 8.84  | 3.11E-01 | 33.98  | 21.10 | 1.07E-01 |
| cg24025255 | 8.32   | 3.95  | 3.50E-02 | 10.58  | 5.96  | 7.59E-02 | 7.10    | 10.04  | 4.79E-01 | 14.82   | 8.60  | 8.48E-02 | -2.74  | 8.91  | 7.58E-01 |
| cg26926138 | 13.89  | 6.59  | 3.50E-02 | 25.47  | 13.19 | 5.36E-02 | 29.43   | 15.94  | 6.48E-02 | 7.36    | 12.35 | 5.51E-01 | 1.79   | 11.91 | 8.81E-01 |
| cg07737644 | -15.18 | 7.20  | 3.50E-02 | -32.09 | 10.53 | 2.30E-03 | -1.01   | 12.91  | 9.37E-01 | -6.70   | 7.22  | 3.53E-01 | -23.45 | 13.53 | 8.30E-02 |
| cg24094513 | 12.72  | 6.03  | 3.50E-02 | 9.81   | 11.08 | 3.76E-01 | 19.77   | 17.34  | 2.54E-01 | 14.09   | 9.84  | 1.52E-01 | 10.27  | 13.30 | 4.40E-01 |
| cg04919592 | 5.99   | 2.84  | 3.50E-02 | 5.95   | 3.48  | 8.71E-02 | 14.02   | 8.21   | 8.75E-02 | 2.25    | 11.37 | 8.43E-01 | 1.30   | 7.35  | 8.59E-01 |
| cg21150901 | 17.50  | 8.30  | 3.50E-02 | 22.31  | 11.59 | 5.43E-02 | 3.08    | 45.70  | 9.46E-01 | 49.25   | 27.21 | 7.03E-02 | 3.79   | 13.83 | 7.84E-01 |
| cg08082142 | -37.56 | 17.82 | 3.50E-02 | -36.40 | 21.05 | 8.38E-02 | -31.14  | 132.73 | 8.15E-01 | 25.43   | 65.09 | 6.96E-01 | -67.26 | 40.80 | 9.92E-02 |
| cg09612534 | 18.10  | 8.59  | 3.50E-02 | 4.23   | 18.12 | 8.15E-01 | 25.70   | 16.92  | 1.29E-01 | 6.80    | 16.48 | 6.80E-01 | 35.29  | 17.31 | 4.15E-02 |
| cg13147822 | 26.78  | 12.70 | 3.50E-02 | 63.06  | 36.71 | 8.58E-02 | 34.05   | 100.25 | 7.34E-01 | 22.56   | 14.23 | 1.13E-01 | 10.38  | 49.09 | 8.33E-01 |
| cg01350293 | 10.47  | 4.97  | 3.50E-02 | 23.27  | 15.26 | 1.27E-01 | 27.36   | 21.15  | 1.96E-01 | 6.48    | 5.64  | 2.51E-01 | 23.21  | 19.73 | 2.39E-01 |
| cg04302628 | -8.95  | 4.25  | 3.50E-02 | -9.41  | 7.76  | 2.25E-01 | -1.58   | 12.73  | 9.01E-01 | -11.94  | 6.21  | 5.47E-02 | -3.11  | 12.12 | 7.97E-01 |
| cg07269125 | 13.13  | 6.23  | 3.50E-02 | 1.83   | 16.37 | 9.11E-01 | -0.56   | 32.65  | 9.86E-01 | 13.86   | 7.11  | 5.12E-02 | 43.72  | 27.48 | 1.12E-01 |
| cg00940560 | 7.79   | 3.70  | 3.50E-02 | 6.09   | 5.79  | 2.93E-01 | 7.72    | 6.72   | 2.51E-01 | 18.17   | 7.60  | 1.67E-02 | -2.75  | 9.11  | 7.62E-01 |
| cg10829120 | -30.37 | 14.41 | 3.50E-02 | -78.98 | 54.48 | 1.47E-01 | -205.54 | 187.78 | 2.74E-01 | -27.91  | 15.46 | 7.11E-02 | 10.69  | 61.00 | 8.61E-01 |
| cg24158452 | 25.46  | 12.08 | 3.50E-02 | -9.27  | 28.27 | 7.43E-01 | -16.21  | 85.72  | 8.50E-01 | 34.01   | 14.28 | 1.73E-02 | 38.25  | 42.05 | 3.63E-01 |
| cg27631794 | 26.47  | 12.56 | 3.50E-02 | 26.40  | 35.95 | 4.63E-01 | 17.56   | 150.70 | 9.07E-01 | 25.72   | 14.08 | 6.77E-02 | 35.25  | 45.68 | 4.40E-01 |
| cg20037575 | 13.68  | 6.49  | 3.50E-02 | 22.06  | 14.56 | 1.30E-01 | 13.27   | 24.51  | 5.88E-01 | 10.59   | 8.13  | 1.93E-01 | 17.18  | 21.17 | 4.17E-01 |
| cg20550154 | -3.57  | 1.69  | 3.51E-02 | -3.27  | 2.32  | 1.59E-01 | -6.76   | 3.25   | 3.75E-02 | -3.81   | 5.97  | 5.23E-01 | 2.69   | 4.97  | 5.89E-01 |
| cg08594606 | -56.82 | 26.96 | 3.51E-02 | -16.63 | 34.96 | 6.34E-01 | 18.83   | 158.97 | 9.06E-01 | -126.05 | 53.10 | 1.76E-02 | -74.06 | 47.29 | 1.17E-01 |
| cg02281854 | -12.03 | 5.71  | 3.51E-02 | -19.53 | 8.72  | 2.51E-02 | -5.32   | 12.82  | 6.78E-01 | -5.05   | 16.81 | 7.64E-01 | -7.84  | 11.22 | 4.85E-01 |
| cg02285725 | -8.93  | 4.24  | 3.51E-02 | -12.97 | 9.64  | 1.78E-01 | -17.14  | 15.41  | 2.66E-01 | -3.96   | 5.39  | 4.63E-01 | -23.64 | 12.57 | 6.01E-02 |
| cg01385157 | 44.07  | 20.91 | 3.51E-02 | 40.27  | 28.97 | 1.65E-01 | 68.05   | 58.11  | 2.42E-01 | -11.07  | 52.47 | 8.33E-01 | 84.04  | 47.85 | 7.91E-02 |

|            |        |       |          |         |       |          |        |        |          |        |       |          |        |       |          |
|------------|--------|-------|----------|---------|-------|----------|--------|--------|----------|--------|-------|----------|--------|-------|----------|
| cg12845432 | 21.39  | 10.15 | 3.51E-02 | 29.60   | 19.06 | 1.20E-01 | 24.06  | 24.67  | 3.29E-01 | 8.30   | 16.25 | 6.10E-01 | 36.15  | 25.58 | 1.58E-01 |
| cg14443558 | 31.63  | 15.01 | 3.51E-02 | 37.64   | 18.13 | 3.79E-02 | 21.23  | 62.90  | 7.36E-01 | 54.41  | 44.24 | 2.19E-01 | -11.31 | 39.66 | 7.76E-01 |
| cg09267217 | -16.77 | 7.96  | 3.51E-02 | -14.30  | 23.43 | 5.42E-01 | -62.71 | 94.89  | 5.09E-01 | -14.70 | 8.90  | 9.84E-02 | -37.29 | 28.41 | 1.89E-01 |
| cg13333374 | 14.07  | 6.68  | 3.51E-02 | 13.92   | 11.32 | 2.19E-01 | 2.78   | 13.51  | 8.37E-01 | 21.24  | 13.51 | 1.16E-01 | 20.60  | 16.54 | 2.13E-01 |
| cg19020434 | -8.95  | 4.24  | 3.51E-02 | -11.95  | 8.25  | 1.48E-01 | -19.22 | 24.00  | 4.23E-01 | -11.97 | 5.97  | 4.49E-02 | 4.42   | 9.54  | 6.43E-01 |
| cg24329717 | 19.76  | 9.38  | 3.51E-02 | 44.90   | 17.88 | 1.21E-02 | 11.07  | 20.19  | 5.84E-01 | 13.36  | 15.28 | 3.82E-01 | -0.01  | 25.76 | 1.00E+00 |
| cg26467949 | 12.85  | 6.10  | 3.51E-02 | 11.54   | 8.11  | 1.55E-01 | 10.74  | 12.34  | 3.84E-01 | 6.40   | 29.96 | 8.31E-01 | 23.00  | 15.77 | 1.45E-01 |
| cg19875852 | 9.96   | 4.73  | 3.51E-02 | 12.04   | 9.94  | 2.26E-01 | 17.85  | 14.27  | 2.11E-01 | 6.90   | 6.19  | 2.64E-01 | 15.51  | 16.65 | 3.52E-01 |
| cg15822394 | 7.17   | 3.40  | 3.51E-02 | 3.95    | 4.86  | 4.16E-01 | 15.71  | 7.76   | 4.27E-02 | 3.48   | 8.44  | 6.80E-01 | 10.63  | 8.66  | 2.19E-01 |
| cg02659338 | 10.10  | 4.79  | 3.51E-02 | 9.54    | 10.08 | 3.44E-01 | 4.16   | 12.20  | 7.33E-01 | 11.14  | 6.48  | 8.56E-02 | 16.78  | 17.92 | 3.49E-01 |
| cg13492803 | 9.13   | 4.33  | 3.51E-02 | 11.89   | 6.71  | 7.62E-02 | 12.60  | 10.09  | 2.12E-01 | 10.89  | 11.34 | 3.37E-01 | 1.01   | 8.63  | 9.07E-01 |
| cg16452651 | 4.99   | 2.37  | 3.51E-02 | 4.48    | 2.94  | 1.28E-01 | 10.58  | 6.39   | 9.81E-02 | 6.02   | 7.74  | 4.37E-01 | 0.66   | 6.76  | 9.22E-01 |
| cg06226150 | -13.35 | 6.34  | 3.51E-02 | -13.16  | 9.71  | 1.75E-01 | 0.21   | 16.48  | 9.90E-01 | -18.75 | 12.66 | 1.39E-01 | -17.51 | 15.12 | 2.47E-01 |
| cg03566787 | -10.53 | 5.00  | 3.51E-02 | -8.41   | 11.94 | 4.81E-01 | -1.58  | 18.15  | 9.31E-01 | -11.69 | 6.10  | 5.54E-02 | -14.15 | 18.01 | 4.32E-01 |
| cg18464991 | -10.70 | 5.08  | 3.51E-02 | -16.01  | 7.14  | 2.50E-02 | -3.02  | 11.96  | 8.01E-01 | 2.92   | 18.13 | 8.72E-01 | -9.71  | 10.44 | 3.52E-01 |
| cg24720604 | -11.86 | 5.63  | 3.51E-02 | 5.23    | 14.72 | 7.22E-01 | -16.71 | 33.02  | 6.13E-01 | -16.71 | 6.46  | 9.73E-03 | 7.92   | 21.76 | 7.16E-01 |
| cg23517752 | 18.89  | 8.97  | 3.51E-02 | 16.41   | 18.72 | 3.81E-01 | 37.85  | 19.09  | 4.74E-02 | 13.40  | 13.65 | 3.26E-01 | 8.43   | 26.07 | 7.46E-01 |
| cg25379649 | 22.73  | 10.79 | 3.51E-02 | 34.45   | 13.24 | 9.25E-03 | 3.74   | 36.13  | 9.18E-01 | -20.17 | 59.22 | 7.33E-01 | 0.89   | 23.34 | 9.70E-01 |
| cg13647601 | 33.85  | 16.06 | 3.51E-02 | 22.90   | 19.19 | 2.33E-01 | 26.80  | 70.92  | 7.05E-01 | 115.28 | 82.65 | 1.63E-01 | 57.47  | 35.06 | 1.01E-01 |
| cg13142152 | -9.53  | 4.52  | 3.51E-02 | -13.61  | 8.85  | 1.24E-01 | -5.48  | 15.78  | 7.29E-01 | -7.36  | 6.29  | 2.42E-01 | -12.40 | 12.15 | 3.08E-01 |
| cg02166450 | 28.11  | 13.34 | 3.51E-02 | 56.68   | 27.25 | 3.75E-02 | 7.28   | 43.24  | 8.66E-01 | 23.73  | 19.25 | 2.18E-01 | 13.15  | 31.04 | 6.72E-01 |
| cg07468397 | -11.23 | 5.33  | 3.51E-02 | -15.07  | 9.15  | 9.95E-02 | -7.44  | 11.82  | 5.29E-01 | -13.92 | 10.54 | 1.86E-01 | -5.16  | 11.89 | 6.64E-01 |
| cg18129755 | 11.79  | 5.59  | 3.51E-02 | 20.64   | 10.52 | 4.97E-02 | 6.24   | 15.24  | 6.82E-01 | 10.66  | 9.67  | 2.70E-01 | 6.21   | 11.25 | 5.81E-01 |
| cg06890761 | 15.00  | 7.12  | 3.51E-02 | 13.73   | 13.79 | 3.19E-01 | 23.71  | 21.21  | 2.63E-01 | 16.02  | 10.00 | 1.09E-01 | 4.75   | 21.17 | 8.23E-01 |
| cg22566787 | 20.31  | 9.64  | 3.51E-02 | 39.77   | 18.42 | 3.08E-02 | 10.67  | 19.42  | 5.83E-01 | 3.14   | 17.09 | 8.54E-01 | 35.74  | 23.95 | 1.36E-01 |
| cg13462082 | 11.44  | 5.43  | 3.51E-02 | 8.72    | 6.15  | 1.56E-01 | 21.85  | 11.37  | 5.47E-02 | 27.05  | 14.56 | 6.32E-02 | -2.52  | 11.53 | 8.27E-01 |
| cg12496363 | 21.53  | 10.22 | 3.51E-02 | 14.13   | 17.86 | 4.29E-01 | 19.50  | 19.68  | 3.22E-01 | 30.71  | 20.80 | 1.40E-01 | 26.17  | 25.38 | 3.02E-01 |
| cg27474149 | -19.30 | 9.16  | 3.51E-02 | -24.71  | 12.31 | 4.48E-02 | -1.52  | 22.63  | 9.46E-01 | -16.80 | 27.84 | 5.46E-01 | -20.36 | 21.91 | 3.53E-01 |
| cg09515767 | 24.43  | 11.60 | 3.51E-02 | 44.31   | 36.97 | 2.31E-01 | -17.04 | 172.65 | 9.21E-01 | 22.67  | 12.66 | 7.32E-02 | 19.33  | 48.23 | 6.89E-01 |
| cg19787366 | -38.87 | 18.45 | 3.51E-02 | -114.43 | 60.47 | 5.85E-02 | -43.08 | 150.06 | 7.74E-01 | -31.38 | 20.89 | 1.33E-01 | -27.69 | 55.32 | 6.17E-01 |
| cg08574758 | 15.87  | 7.53  | 3.51E-02 | 13.44   | 19.74 | 4.96E-01 | 43.34  | 20.15  | 3.15E-02 | 13.28  | 9.45  | 1.60E-01 | -7.54  | 26.87 | 7.79E-01 |
| cg01804500 | 14.71  | 6.98  | 3.51E-02 | 15.05   | 17.90 | 4.01E-01 | 1.39   | 18.21  | 9.39E-01 | 17.45  | 8.79  | 4.72E-02 | 17.16  | 26.22 | 5.13E-01 |
| cg23307264 | -8.34  | 3.96  | 3.51E-02 | -3.45   | 8.74  | 6.93E-01 | -10.21 | 13.30  | 4.43E-01 | 14.33  | 62.97 | 8.20E-01 | -9.66  | 4.72  | 4.09E-02 |
| cg00870449 | -8.33  | 3.95  | 3.52E-02 | -14.81  | 8.13  | 6.84E-02 | -12.71 | 14.87  | 3.93E-01 | -4.62  | 5.18  | 3.72E-01 | -11.28 | 11.97 | 3.46E-01 |
| cg07272654 | 8.67   | 4.11  | 3.52E-02 | 11.08   | 5.56  | 4.64E-02 | 8.94   | 9.68   | 3.56E-01 | 13.93  | 11.31 | 2.18E-01 | -6.06  | 10.98 | 5.81E-01 |



|            |        |       |          |         |       |          |         |        |          |        |       |          |        |       |          |
|------------|--------|-------|----------|---------|-------|----------|---------|--------|----------|--------|-------|----------|--------|-------|----------|
| cg13946191 | 19.46  | 9.24  | 3.52E-02 | 10.27   | 18.44 | 5.77E-01 | 4.94    | 21.73  | 8.20E-01 | 31.28  | 13.69 | 2.23E-02 | 15.42  | 27.49 | 5.75E-01 |
| cg05717794 | 9.97   | 4.73  | 3.52E-02 | 11.91   | 6.33  | 6.01E-02 | 22.01   | 10.47  | 3.56E-02 | -3.97  | 11.25 | 7.24E-01 | 4.09   | 11.74 | 7.28E-01 |
| cg06355830 | -26.39 | 12.53 | 3.52E-02 | 6.75    | 36.92 | 8.55E-01 | -115.60 | 233.91 | 6.21E-01 | -27.26 | 13.92 | 5.02E-02 | -66.03 | 46.70 | 1.57E-01 |
| cg13172696 | 13.96  | 6.63  | 3.52E-02 | 24.36   | 11.69 | 3.72E-02 | 11.19   | 25.35  | 6.59E-01 | 4.49   | 9.30  | 6.29E-01 | 30.13  | 20.68 | 1.45E-01 |
| cg21777553 | 16.15  | 7.67  | 3.52E-02 | 21.41   | 10.29 | 3.75E-02 | -2.03   | 20.97  | 9.23E-01 | 19.14  | 27.26 | 4.82E-01 | 13.03  | 15.91 | 4.13E-01 |
| cg06968181 | 13.24  | 6.28  | 3.52E-02 | 27.74   | 17.57 | 1.14E-01 | -36.22  | 77.96  | 6.42E-01 | 13.94  | 7.06  | 4.85E-02 | -14.91 | 23.08 | 5.18E-01 |
| cg02381965 | 76.69  | 36.41 | 3.52E-02 | 29.27   | 49.31 | 5.53E-01 | 23.17   | 187.50 | 9.02E-01 | 185.64 | 89.65 | 3.84E-02 | 115.89 | 72.48 | 1.10E-01 |
| cg12712771 | -21.16 | 10.04 | 3.52E-02 | -35.20  | 17.88 | 4.89E-02 | -44.58  | 29.88  | 1.36E-01 | -10.32 | 15.81 | 5.14E-01 | -5.01  | 24.52 | 8.38E-01 |
| cg26322591 | -10.68 | 5.07  | 3.52E-02 | -4.42   | 7.07  | 5.31E-01 | -21.86  | 12.67  | 8.45E-02 | -16.37 | 14.09 | 2.46E-01 | -14.27 | 11.49 | 2.14E-01 |
| cg19666687 | -13.25 | 6.29  | 3.52E-02 | -0.13   | 13.84 | 9.92E-01 | 16.58   | 34.61  | 6.32E-01 | -16.77 | 9.37  | 7.34E-02 | -20.10 | 11.33 | 7.59E-02 |
| cg03469682 | -16.60 | 7.88  | 3.52E-02 | -37.47  | 11.84 | 1.55E-03 | 5.51    | 15.27  | 7.18E-01 | -13.83 | 7.17  | 5.36E-02 | -15.91 | 15.48 | 3.04E-01 |
| cg26705583 | -25.35 | 12.04 | 3.52E-02 | -4.03   | 20.55 | 8.44E-01 | -18.88  | 29.28  | 5.19E-01 | -49.97 | 20.60 | 1.53E-02 | -25.36 | 31.43 | 4.20E-01 |
| cg25424937 | 19.95  | 9.47  | 3.52E-02 | 25.08   | 20.01 | 2.10E-01 | -7.25   | 41.89  | 8.63E-01 | 28.14  | 12.27 | 2.19E-02 | -15.88 | 26.34 | 5.47E-01 |
| cg00965133 | 17.84  | 8.47  | 3.52E-02 | 14.30   | 13.99 | 3.07E-01 | 27.72   | 15.43  | 7.25E-02 | 1.15   | 19.78 | 9.54E-01 | 27.10  | 21.94 | 2.17E-01 |
| cg23371746 | 20.51  | 9.74  | 3.52E-02 | 13.29   | 30.87 | 6.67E-01 | -150.37 | 114.69 | 1.90E-01 | 23.83  | 12.66 | 5.98E-02 | 20.47  | 17.74 | 2.48E-01 |
| cg10207553 | 8.99   | 4.27  | 3.52E-02 | 13.14   | 6.52  | 4.39E-02 | 13.95   | 9.17   | 1.28E-01 | 5.22   | 11.16 | 6.40E-01 | -2.10  | 9.38  | 8.23E-01 |
| cg24082880 | 12.49  | 5.93  | 3.52E-02 | 14.51   | 13.26 | 2.74E-01 | -3.54   | 19.01  | 8.52E-01 | 14.80  | 7.63  | 5.26E-02 | 10.06  | 18.81 | 5.93E-01 |
| cg06423949 | -16.30 | 7.74  | 3.52E-02 | -7.27   | 18.75 | 6.98E-01 | -0.19   | 30.79  | 9.95E-01 | -21.90 | 9.30  | 1.85E-02 | 1.77   | 28.64 | 9.51E-01 |
| cg08915603 | 8.86   | 4.21  | 3.52E-02 | 19.32   | 10.43 | 6.40E-02 | 1.78    | 11.92  | 8.81E-01 | 10.82  | 6.63  | 1.03E-01 | 3.67   | 7.55  | 6.27E-01 |
| cg13139848 | 17.26  | 8.20  | 3.52E-02 | 7.24    | 13.13 | 5.81E-01 | 29.10   | 17.13  | 8.94E-02 | 29.38  | 16.86 | 8.14E-02 | 5.77   | 21.51 | 7.89E-01 |
| cg16798537 | -11.93 | 5.67  | 3.52E-02 | -17.69  | 8.69  | 4.18E-02 | -8.94   | 15.76  | 5.70E-01 | -14.80 | 11.79 | 2.09E-01 | 0.74   | 12.23 | 9.52E-01 |
| cg08390172 | 21.62  | 10.27 | 3.52E-02 | 37.60   | 15.11 | 1.29E-02 | 35.45   | 31.21  | 2.56E-01 | 15.35  | 32.86 | 6.40E-01 | -0.51  | 16.86 | 9.76E-01 |
| cg03209472 | 19.98  | 9.49  | 3.52E-02 | 34.56   | 17.34 | 4.63E-02 | 14.15   | 18.84  | 4.52E-01 | 25.28  | 17.44 | 1.47E-01 | -9.52  | 24.41 | 6.97E-01 |
| cg14073219 | -35.01 | 16.63 | 3.52E-02 | -54.40  | 45.39 | 2.31E-01 | -126.84 | 226.59 | 5.76E-01 | -30.02 | 19.11 | 1.16E-01 | -41.61 | 51.74 | 4.21E-01 |
| cg00360072 | -49.25 | 23.39 | 3.52E-02 | -113.92 | 60.71 | 6.06E-02 | -277.92 | 282.07 | 3.24E-01 | -40.70 | 27.08 | 1.33E-01 | -0.66  | 74.53 | 9.93E-01 |
| cg07001072 | 12.17  | 5.78  | 3.52E-02 | 5.73    | 11.30 | 6.12E-01 | -17.03  | 22.74  | 4.54E-01 | 15.09  | 7.92  | 5.69E-02 | 26.35  | 15.33 | 8.56E-02 |
| cg06902698 | 8.20   | 3.89  | 3.52E-02 | 4.98    | 4.63  | 2.82E-01 | 18.78   | 7.04   | 7.69E-03 | 12.34  | 10.15 | 2.24E-01 | 0.65   | 7.32  | 9.30E-01 |
| cg17681516 | 6.15   | 2.92  | 3.52E-02 | 3.00    | 3.91  | 4.43E-01 | 7.80    | 6.71   | 2.45E-01 | 0.75   | 12.93 | 9.54E-01 | 14.74  | 6.51  | 2.37E-02 |
| cg05926943 | 22.84  | 10.85 | 3.52E-02 | 31.73   | 40.80 | 4.37E-01 | -37.65  | 151.62 | 8.04E-01 | 24.53  | 11.64 | 3.51E-02 | -9.03  | 45.75 | 8.44E-01 |
| cg00471371 | 5.50   | 2.61  | 3.52E-02 | 4.52    | 3.42  | 1.86E-01 | 8.12    | 6.49   | 2.11E-01 | 8.64   | 7.57  | 2.53E-01 | 3.83   | 7.15  | 5.93E-01 |
| cg04635364 | -8.05  | 3.82  | 3.52E-02 | -9.83   | 5.43  | 7.02E-02 | -12.88  | 8.16   | 1.14E-01 | -11.17 | 5.33  | 3.60E-02 | 7.84   | 8.82  | 3.74E-01 |
| cg02616368 | -13.67 | 6.49  | 3.52E-02 | -16.00  | 9.66  | 9.76E-02 | -0.31   | 14.92  | 9.84E-01 | -23.72 | 17.86 | 1.84E-01 | -14.30 | 13.61 | 2.93E-01 |
| cg22241838 | -7.06  | 3.35  | 3.52E-02 | -4.08   | 4.08  | 3.17E-01 | -19.15  | 8.47   | 2.37E-02 | -1.05  | 9.12  | 9.08E-01 | -10.81 | 7.99  | 1.76E-01 |
| cg26449586 | 10.34  | 4.91  | 3.52E-02 | 9.69    | 6.14  | 1.14E-01 | 26.91   | 9.91   | 6.62E-03 | 4.04   | 9.44  | 6.69E-01 | 1.97   | 9.85  | 8.42E-01 |
| cg17490089 | -6.60  | 3.14  | 3.52E-02 | -10.34  | 4.37  | 1.80E-02 | -4.46   | 7.68   | 5.61E-01 | -0.61  | 10.96 | 9.56E-01 | -2.05  | 6.44  | 7.50E-01 |

|            |        |       |          |        |       |          |         |        |          |        |       |          |        |       |          |
|------------|--------|-------|----------|--------|-------|----------|---------|--------|----------|--------|-------|----------|--------|-------|----------|
| cg19255084 | -15.90 | 7.55  | 3.52E-02 | -34.84 | 16.48 | 3.45E-02 | -15.83  | 29.87  | 5.96E-01 | -11.45 | 9.31  | 2.19E-01 | -0.43  | 29.12 | 9.88E-01 |
| cg25098585 | -20.55 | 9.76  | 3.52E-02 | -26.05 | 15.30 | 8.86E-02 | -25.42  | 25.87  | 3.26E-01 | -20.66 | 21.22 | 3.30E-01 | -8.19  | 19.96 | 6.82E-01 |
| cg24215635 | 16.15  | 7.67  | 3.52E-02 | 30.06  | 17.01 | 7.72E-02 | 4.88    | 37.43  | 8.96E-01 | 11.49  | 9.57  | 2.30E-01 | 21.90  | 22.95 | 3.40E-01 |
| cg02847140 | 19.00  | 9.02  | 3.52E-02 | 40.10  | 25.01 | 1.09E-01 | -7.08   | 59.13  | 9.05E-01 | 14.89  | 10.45 | 1.54E-01 | 28.05  | 28.32 | 3.22E-01 |
| cg15854394 | -12.12 | 5.76  | 3.53E-02 | -29.32 | 18.51 | 1.13E-01 | 14.35   | 24.63  | 5.60E-01 | -9.25  | 7.14  | 1.95E-01 | -20.45 | 12.92 | 1.14E-01 |
| cg09468767 | -24.85 | 11.80 | 3.53E-02 | -44.38 | 40.20 | 2.70E-01 | -86.01  | 154.60 | 5.78E-01 | -23.57 | 13.49 | 8.07E-02 | -17.44 | 31.19 | 5.76E-01 |
| cg23480730 | 23.43  | 11.13 | 3.53E-02 | 31.84  | 16.09 | 4.78E-02 | 43.71   | 37.88  | 2.49E-01 | 52.56  | 37.11 | 1.57E-01 | -0.88  | 18.93 | 9.63E-01 |
| cg04606367 | 17.35  | 8.24  | 3.53E-02 | 15.63  | 13.79 | 2.57E-01 | 17.40   | 23.91  | 4.67E-01 | 8.40   | 18.16 | 6.44E-01 | 25.05  | 14.61 | 8.64E-02 |
| cg21053051 | -24.02 | 11.41 | 3.53E-02 | -13.73 | 37.72 | 7.16E-01 | -154.96 | 154.74 | 3.17E-01 | -20.96 | 12.38 | 9.04E-02 | -77.58 | 49.59 | 1.18E-01 |
| cg02995731 | -16.40 | 7.79  | 3.53E-02 | -28.06 | 12.52 | 2.50E-02 | -24.11  | 17.82  | 1.76E-01 | 4.35   | 18.41 | 8.13E-01 | -7.04  | 15.80 | 6.56E-01 |
| cg23337501 | -18.09 | 8.59  | 3.53E-02 | -12.82 | 17.92 | 4.74E-01 | -74.92  | 35.73  | 3.60E-02 | -11.84 | 8.54  | 1.65E-01 | -31.32 | 22.80 | 1.70E-01 |
| cg12418947 | 14.86  | 7.06  | 3.53E-02 | 26.26  | 13.65 | 5.45E-02 | 20.56   | 17.93  | 2.51E-01 | 9.30   | 13.60 | 4.94E-01 | 6.97   | 12.72 | 5.84E-01 |
| cg26326208 | 11.79  | 5.60  | 3.53E-02 | 20.16  | 7.15  | 4.82E-03 | 17.57   | 13.36  | 1.88E-01 | -4.66  | 16.77 | 7.81E-01 | 2.48   | 9.04  | 7.84E-01 |
| cg06673130 | 7.37   | 3.50  | 3.53E-02 | 6.33   | 5.21  | 2.25E-01 | 14.57   | 8.59   | 9.00E-02 | -2.66  | 9.93  | 7.89E-01 | 9.39   | 6.89  | 1.73E-01 |
| cg04128880 | 12.62  | 5.99  | 3.53E-02 | 5.95   | 14.91 | 6.90E-01 | -13.09  | 31.20  | 6.75E-01 | 15.93  | 7.04  | 2.38E-02 | 7.85   | 21.49 | 7.15E-01 |
| cg19102271 | 33.00  | 15.68 | 3.53E-02 | 21.36  | 22.66 | 3.46E-01 | 1.16    | 42.33  | 9.78E-01 | 59.00  | 69.80 | 3.98E-01 | 58.83  | 27.13 | 3.01E-02 |
| cg02844051 | 15.14  | 7.19  | 3.53E-02 | 17.58  | 16.61 | 2.90E-01 | -25.11  | 42.07  | 5.51E-01 | 14.72  | 8.66  | 8.92E-02 | 25.87  | 23.48 | 2.71E-01 |
| cg06171830 | -8.76  | 4.16  | 3.53E-02 | -11.74 | 9.06  | 1.95E-01 | 19.52   | 18.28  | 2.86E-01 | -9.99  | 5.31  | 5.99E-02 | -9.38  | 11.81 | 4.27E-01 |
| cg00370173 | -9.94  | 4.72  | 3.53E-02 | -14.34 | 8.93  | 1.08E-01 | -6.11   | 13.64  | 6.54E-01 | -10.00 | 6.76  | 1.39E-01 | -2.82  | 14.05 | 8.41E-01 |
| cg21273856 | 43.47  | 20.65 | 3.53E-02 | 46.79  | 31.84 | 1.42E-01 | -46.66  | 79.93  | 5.59E-01 | 29.40  | 14.84 | 4.76E-02 | 117.15 | 45.16 | 9.49E-03 |
| cg13594465 | -12.44 | 5.91  | 3.53E-02 | -11.14 | 10.43 | 2.86E-01 | -11.83  | 13.63  | 3.85E-01 | -7.14  | 10.59 | 5.00E-01 | -24.67 | 13.97 | 7.75E-02 |
| cg14301000 | -61.00 | 28.98 | 3.53E-02 | -96.84 | 43.21 | 2.50E-02 | 69.38   | 167.68 | 6.79E-01 | -47.21 | 57.07 | 4.08E-01 | -27.91 | 56.61 | 6.22E-01 |
| cg16977596 | 20.40  | 9.69  | 3.53E-02 | 7.26   | 14.76 | 6.23E-01 | 29.13   | 22.30  | 1.91E-01 | 25.64  | 20.83 | 2.18E-01 | 38.12  | 24.01 | 1.12E-01 |
| cg04317651 | 18.61  | 8.84  | 3.53E-02 | 19.47  | 17.25 | 2.59E-01 | 14.88   | 17.16  | 3.86E-01 | 9.02   | 10.51 | 3.91E-01 | 60.07  | 24.39 | 1.38E-02 |
| cg00983803 | -12.97 | 6.16  | 3.53E-02 | -23.70 | 10.44 | 2.32E-02 | -5.19   | 13.84  | 7.08E-01 | -2.41  | 12.69 | 8.50E-01 | -14.36 | 13.23 | 2.78E-01 |
| cg03951833 | -5.82  | 2.76  | 3.53E-02 | -10.06 | 2.85  | 4.23E-04 | 1.12    | 4.12   | 7.86E-01 | -6.38  | 6.42  | 3.21E-01 | -6.48  | 4.86  | 1.82E-01 |
| cg02670929 | 10.47  | 4.97  | 3.53E-02 | 12.13  | 9.18  | 1.86E-01 | 3.08    | 11.64  | 7.91E-01 | 13.68  | 8.28  | 9.85E-02 | 8.64   | 12.34 | 4.84E-01 |
| cg09608652 | 9.95   | 4.73  | 3.53E-02 | 14.09  | 6.35  | 2.66E-02 | 9.47    | 14.99  | 5.28E-01 | 9.24   | 12.98 | 4.77E-01 | -0.07  | 10.21 | 9.95E-01 |
| cg08780166 | -10.63 | 5.05  | 3.53E-02 | -20.87 | 13.06 | 1.10E-01 | -4.45   | 22.11  | 8.41E-01 | -9.30  | 5.89  | 1.14E-01 | -6.89  | 20.17 | 7.32E-01 |
| cg26927516 | -13.84 | 6.58  | 3.53E-02 | -24.82 | 16.93 | 1.43E-01 | -2.99   | 31.13  | 9.23E-01 | -12.29 | 7.76  | 1.13E-01 | -13.18 | 22.54 | 5.59E-01 |
| cg23219720 | 29.90  | 14.21 | 3.53E-02 | 38.06  | 19.97 | 5.67E-02 | 34.59   | 50.65  | 4.95E-01 | 44.59  | 45.74 | 3.30E-01 | 11.33  | 25.18 | 6.53E-01 |
| cg09851981 | -10.62 | 5.05  | 3.53E-02 | -21.18 | 9.47  | 2.53E-02 | -4.90   | 13.12  | 7.09E-01 | -4.54  | 7.30  | 5.34E-01 | -18.83 | 16.71 | 2.60E-01 |
| cg08832851 | -6.28  | 2.98  | 3.53E-02 | -3.46  | 4.32  | 4.23E-01 | -12.74  | 5.60   | 2.30E-02 | -4.50  | 9.57  | 6.38E-01 | -4.07  | 7.88  | 6.06E-01 |
| cg25632672 | -51.78 | 24.61 | 3.53E-02 | -50.84 | 69.54 | 4.65E-01 | -140.55 | 200.03 | 4.82E-01 | -61.32 | 28.64 | 3.23E-02 | 16.17  | 70.56 | 8.19E-01 |
| cg07918453 | 17.39  | 8.26  | 3.53E-02 | 7.27   | 17.99 | 6.86E-01 | 30.80   | 36.48  | 3.99E-01 | 21.45  | 10.43 | 3.98E-02 | 7.42   | 24.88 | 7.65E-01 |

|            |        |       |          |        |       |          |         |        |          |        |       |          |        |       |          |
|------------|--------|-------|----------|--------|-------|----------|---------|--------|----------|--------|-------|----------|--------|-------|----------|
| cg14913676 | 14.35  | 6.82  | 3.53E-02 | 22.27  | 14.41 | 1.22E-01 | 7.04    | 54.85  | 8.98E-01 | 13.83  | 8.19  | 9.11E-02 | -5.13  | 26.41 | 8.46E-01 |
| cg04764907 | -17.17 | 8.16  | 3.53E-02 | -0.90  | 5.69  | 8.75E-01 | -18.09  | 8.62   | 3.59E-02 | -46.21 | 22.05 | 3.61E-02 | -25.54 | 8.84  | 3.88E-03 |
| cg06742159 | -46.97 | 22.32 | 3.53E-02 | -41.13 | 29.10 | 1.57E-01 | -39.07  | 86.91  | 6.53E-01 | -21.46 | 76.14 | 7.78E-01 | -70.64 | 43.80 | 1.07E-01 |
| cg07025678 | -22.51 | 10.70 | 3.53E-02 | -14.69 | 21.33 | 4.91E-01 | 1.14    | 52.65  | 9.83E-01 | -27.39 | 13.68 | 4.53E-02 | -22.13 | 34.61 | 5.22E-01 |
| cg14747225 | -32.53 | 15.46 | 3.54E-02 | -41.97 | 18.18 | 2.10E-02 | -49.00  | 96.71  | 6.12E-01 | 16.89  | 93.99 | 8.57E-01 | -6.16  | 32.66 | 8.50E-01 |
| cg02079645 | -11.64 | 5.53  | 3.54E-02 | -13.36 | 11.08 | 2.28E-01 | -1.62   | 16.38  | 9.21E-01 | -12.48 | 7.59  | 1.00E-01 | -14.20 | 17.07 | 4.06E-01 |
| cg02515233 | 22.22  | 10.56 | 3.54E-02 | 28.18  | 17.53 | 1.08E-01 | 3.87    | 34.64  | 9.11E-01 | 26.80  | 18.73 | 1.52E-01 | 13.75  | 22.18 | 5.35E-01 |
| cg21826784 | 6.88   | 3.27  | 3.54E-02 | 5.62   | 4.37  | 1.99E-01 | 15.69   | 7.57   | 3.83E-02 | 6.54   | 10.35 | 5.28E-01 | 1.05   | 8.33  | 9.00E-01 |
| cg12749636 | 22.78  | 10.83 | 3.54E-02 | 14.28  | 16.47 | 3.86E-01 | 49.85   | 39.01  | 2.01E-01 | 22.76  | 28.03 | 4.17E-01 | 27.43  | 18.51 | 1.39E-01 |
| cg12300018 | -10.56 | 5.02  | 3.54E-02 | -17.13 | 7.85  | 2.90E-02 | -10.49  | 12.38  | 3.97E-01 | 0.81   | 12.10 | 9.46E-01 | -7.73  | 9.95  | 4.37E-01 |
| cg18011999 | 24.08  | 11.44 | 3.54E-02 | 45.02  | 31.13 | 1.48E-01 | -16.54  | 148.17 | 9.11E-01 | 24.25  | 12.91 | 6.03E-02 | -13.10 | 42.27 | 7.57E-01 |
| cg11582369 | -9.68  | 4.60  | 3.54E-02 | -23.36 | 15.53 | 1.33E-01 | -2.90   | 12.83  | 8.21E-01 | -9.95  | 5.46  | 6.82E-02 | -2.51  | 17.04 | 8.83E-01 |
| cg13002493 | 12.54  | 5.96  | 3.54E-02 | 28.59  | 15.55 | 6.60E-02 | -6.09   | 63.56  | 9.24E-01 | 9.78   | 6.85  | 1.53E-01 | 11.42  | 20.33 | 5.74E-01 |
| cg15399131 | -7.57  | 3.60  | 3.54E-02 | -15.49 | 8.17  | 5.79E-02 | -23.73  | 19.67  | 2.28E-01 | -6.69  | 4.67  | 1.52E-01 | 1.11   | 8.50  | 8.96E-01 |
| cg18074726 | -10.03 | 4.77  | 3.54E-02 | -19.59 | 14.26 | 1.70E-01 | -2.09   | 32.95  | 9.49E-01 | -7.11  | 5.57  | 2.02E-01 | -19.20 | 12.98 | 1.39E-01 |
| cg22401883 | 17.37  | 8.26  | 3.54E-02 | 6.15   | 20.66 | 7.66E-01 | -14.21  | 53.22  | 7.89E-01 | 22.49  | 9.65  | 1.98E-02 | 3.22   | 28.41 | 9.10E-01 |
| cg15839752 | -12.53 | 5.96  | 3.54E-02 | -15.21 | 10.81 | 1.59E-01 | -18.57  | 11.44  | 1.05E-01 | -7.66  | 13.49 | 5.70E-01 | -6.04  | 12.39 | 6.26E-01 |
| cg03857198 | 5.78   | 2.75  | 3.54E-02 | 5.38   | 3.52  | 1.26E-01 | 9.28    | 7.34   | 2.06E-01 | 7.19   | 8.31  | 3.87E-01 | 2.94   | 7.32  | 6.88E-01 |
| cg26877678 | 6.53   | 3.11  | 3.54E-02 | 7.73   | 4.19  | 6.49E-02 | 7.98    | 6.45   | 2.16E-01 | 3.84   | 10.58 | 7.17E-01 | 0.78   | 8.54  | 9.27E-01 |
| cg10613381 | 11.10  | 5.28  | 3.54E-02 | 7.95   | 7.07  | 2.60E-01 | -2.29   | 10.64  | 8.30E-01 | 23.70  | 13.54 | 8.01E-02 | 20.50  | 9.60  | 3.27E-02 |
| cg14553881 | 5.87   | 2.79  | 3.54E-02 | 1.03   | 4.48  | 8.18E-01 | 6.75    | 5.48   | 2.18E-01 | 7.78   | 7.09  | 2.72E-01 | 12.66  | 6.26  | 4.29E-02 |
| cg24428040 | -10.54 | 5.01  | 3.54E-02 | -3.52  | 7.79  | 6.51E-01 | -22.50  | 11.80  | 5.67E-02 | -6.92  | 11.45 | 5.46E-01 | -17.23 | 10.80 | 1.11E-01 |
| cg00953211 | 18.03  | 8.57  | 3.54E-02 | 32.15  | 16.54 | 5.19E-02 | 19.22   | 18.48  | 2.98E-01 | 12.97  | 14.02 | 3.55E-01 | 2.93   | 22.69 | 8.97E-01 |
| cg12659114 | 11.42  | 5.43  | 3.54E-02 | 11.55  | 13.31 | 3.85E-01 | 11.30   | 21.46  | 5.98E-01 | 11.60  | 6.68  | 8.26E-02 | 10.21  | 16.40 | 5.34E-01 |
| cg17356328 | -32.33 | 15.37 | 3.54E-02 | -27.08 | 39.90 | 4.97E-01 | -170.99 | 202.96 | 4.00E-01 | -33.85 | 17.51 | 5.31E-02 | -16.54 | 56.06 | 7.68E-01 |
| cg24430322 | 21.59  | 10.26 | 3.54E-02 | 30.24  | 13.42 | 2.43E-02 | 14.26   | 31.92  | 6.55E-01 | 15.21  | 41.96 | 7.17E-01 | 6.06   | 20.44 | 7.67E-01 |
| cg15866367 | 7.78   | 3.70  | 3.54E-02 | 9.77   | 6.35  | 1.24E-01 | 16.77   | 9.18   | 6.79E-02 | 2.43   | 5.57  | 6.63E-01 | 11.71  | 15.39 | 4.47E-01 |
| cg02121447 | 10.86  | 5.16  | 3.54E-02 | 15.79  | 8.22  | 5.46E-02 | 6.56    | 11.59  | 5.71E-01 | 14.24  | 10.26 | 1.65E-01 | -1.83  | 13.17 | 8.90E-01 |
| cg20871277 | 18.49  | 8.79  | 3.54E-02 | 36.41  | 17.60 | 3.86E-02 | 13.36   | 16.76  | 4.26E-01 | 0.63   | 15.60 | 9.68E-01 | 34.95  | 22.07 | 1.13E-01 |
| cg00308792 | 23.59  | 11.21 | 3.54E-02 | 42.91  | 20.43 | 3.57E-02 | 43.62   | 23.05  | 5.85E-02 | 5.00   | 11.26 | 6.57E-01 | 27.84  | 28.85 | 3.35E-01 |
| cg06526326 | -12.63 | 6.00  | 3.54E-02 | -5.51  | 12.97 | 6.71E-01 | -18.12  | 33.88  | 5.93E-01 | -15.79 | 7.28  | 3.00E-02 | -1.82  | 22.07 | 9.34E-01 |
| cg24079727 | 5.02   | 2.39  | 3.54E-02 | 5.58   | 3.23  | 8.45E-02 | 8.35    | 6.11   | 1.72E-01 | 6.74   | 5.71  | 2.38E-01 | -3.72  | 6.70  | 5.79E-01 |
| cg17357285 | 18.44  | 8.76  | 3.54E-02 | 19.14  | 11.75 | 1.03E-01 | 14.95   | 55.49  | 7.88E-01 | 32.91  | 30.21 | 2.76E-01 | 13.88  | 15.16 | 3.60E-01 |
| cg25772039 | -39.58 | 18.81 | 3.54E-02 | -43.96 | 28.09 | 1.18E-01 | 51.59   | 56.88  | 3.64E-01 | -55.96 | 36.75 | 1.28E-01 | -59.94 | 43.99 | 1.73E-01 |
| cg26778754 | 34.19  | 16.25 | 3.54E-02 | 24.01  | 20.42 | 2.40E-01 | 57.52   | 103.13 | 5.77E-01 | 93.40  | 55.33 | 9.14E-02 | 37.16  | 32.16 | 2.48E-01 |

|            |        |       |          |        |       |          |         |        |          |        |       |          |        |       |          |
|------------|--------|-------|----------|--------|-------|----------|---------|--------|----------|--------|-------|----------|--------|-------|----------|
| cg27075786 | 18.45  | 8.77  | 3.54E-02 | 36.86  | 21.13 | 8.10E-02 | -12.33  | 34.32  | 7.19E-01 | 13.19  | 8.42  | 1.17E-01 | 54.82  | 31.43 | 8.11E-02 |
| cg10009737 | 18.23  | 8.67  | 3.54E-02 | 19.90  | 14.41 | 1.67E-01 | 4.68    | 20.58  | 8.20E-01 | 11.04  | 9.33  | 2.37E-01 | 57.86  | 23.03 | 1.20E-02 |
| cg22792552 | 16.32  | 7.76  | 3.54E-02 | 18.64  | 20.99 | 3.74E-01 | 17.81   | 31.19  | 5.68E-01 | 13.32  | 9.05  | 1.41E-01 | 43.40  | 30.12 | 1.50E-01 |
| cg09012708 | 24.49  | 11.64 | 3.54E-02 | 37.26  | 37.38 | 3.19E-01 | -138.71 | 170.10 | 4.15E-01 | 23.34  | 12.75 | 6.70E-02 | 32.08  | 46.09 | 4.86E-01 |
| cg19046959 | 25.45  | 12.10 | 3.54E-02 | 37.44  | 17.12 | 2.87E-02 | 28.24   | 33.40  | 3.98E-01 | 14.78  | 32.69 | 6.51E-01 | 4.36   | 25.12 | 8.62E-01 |
| cg17788013 | -8.46  | 4.02  | 3.54E-02 | -11.43 | 9.60  | 2.34E-01 | -10.97  | 14.41  | 4.46E-01 | -5.11  | 5.08  | 3.15E-01 | -19.97 | 11.61 | 8.53E-02 |
| cg13919369 | -17.89 | 8.50  | 3.54E-02 | -29.96 | 25.72 | 2.44E-01 | -31.33  | 31.02  | 3.13E-01 | -16.47 | 9.85  | 9.45E-02 | 0.35   | 32.23 | 9.91E-01 |
| cg04208434 | 9.96   | 4.73  | 3.54E-02 | 13.75  | 6.94  | 4.75E-02 | 8.24    | 10.74  | 4.43E-01 | 15.09  | 14.18 | 2.87E-01 | 1.18   | 9.91  | 9.05E-01 |
| cg09797463 | 8.59   | 4.08  | 3.54E-02 | 7.05   | 5.36  | 1.88E-01 | 15.62   | 9.81   | 1.11E-01 | 11.08  | 12.20 | 3.64E-01 | 4.05   | 11.15 | 7.17E-01 |
| cg06573787 | 5.59   | 2.66  | 3.55E-02 | 8.72   | 4.50  | 5.29E-02 | 4.48    | 5.40   | 4.07E-01 | 7.72   | 6.13  | 2.08E-01 | 0.08   | 5.64  | 9.88E-01 |
| cg03163819 | 8.52   | 4.05  | 3.55E-02 | 11.28  | 7.10  | 1.12E-01 | 13.47   | 10.44  | 1.97E-01 | 5.28   | 6.14  | 3.90E-01 | 5.92   | 13.65 | 6.64E-01 |
| cg22572454 | 19.49  | 9.27  | 3.55E-02 | 16.34  | 22.11 | 4.60E-01 | 16.70   | 22.79  | 4.64E-01 | 18.30  | 12.47 | 1.42E-01 | 35.08  | 28.31 | 2.15E-01 |
| cg01345517 | 36.35  | 17.29 | 3.55E-02 | 49.57  | 23.12 | 3.20E-02 | -7.51   | 58.88  | 8.99E-01 | 65.23  | 79.50 | 4.12E-01 | 20.19  | 31.17 | 5.17E-01 |
| cg21149811 | -17.69 | 8.41  | 3.55E-02 | -29.38 | 12.42 | 1.80E-02 | -15.19  | 19.45  | 4.35E-01 | -3.01  | 21.25 | 8.87E-01 | -4.59  | 18.89 | 8.08E-01 |
| cg01558877 | -8.43  | 4.01  | 3.55E-02 | -7.82  | 7.39  | 2.90E-01 | -9.65   | 12.19  | 4.28E-01 | -7.68  | 5.96  | 1.97E-01 | -11.11 | 10.55 | 2.92E-01 |
| cg07338715 | 11.05  | 5.25  | 3.55E-02 | 17.76  | 7.14  | 1.29E-02 | 24.14   | 15.01  | 1.08E-01 | 5.36   | 9.34  | 5.66E-01 | -2.07  | 10.78 | 8.48E-01 |
| cg09356141 | 14.95  | 7.11  | 3.55E-02 | 12.52  | 13.74 | 3.62E-01 | -14.68  | 26.93  | 5.86E-01 | 20.00  | 9.57  | 3.67E-02 | 14.29  | 21.29 | 5.02E-01 |
| cg18279467 | 42.47  | 20.20 | 3.55E-02 | 7.15   | 41.44 | 8.63E-01 | 1.90    | 136.45 | 9.89E-01 | 68.19  | 21.04 | 1.19E-03 | -11.10 | 51.29 | 8.29E-01 |
| cg20736321 | -13.36 | 6.35  | 3.55E-02 | -14.82 | 9.75  | 1.29E-01 | 8.76    | 16.94  | 6.05E-01 | -24.62 | 14.86 | 9.75E-02 | -15.08 | 12.66 | 2.34E-01 |
| cg15852446 | 7.38   | 3.51  | 3.55E-02 | 8.60   | 5.27  | 1.03E-01 | 9.14    | 7.89   | 2.47E-01 | 8.14   | 8.41  | 3.33E-01 | 1.87   | 8.15  | 8.19E-01 |
| cg23449764 | -13.80 | 6.56  | 3.55E-02 | -15.94 | 12.24 | 1.93E-01 | -2.31   | 14.71  | 8.75E-01 | -18.57 | 11.07 | 9.35E-02 | -13.79 | 16.29 | 3.97E-01 |
| cg11129609 | 11.77  | 5.60  | 3.55E-02 | 13.99  | 7.97  | 7.91E-02 | 18.74   | 10.56  | 7.59E-02 | 0.19   | 17.79 | 9.92E-01 | -3.31  | 15.73 | 8.33E-01 |
| cg23502565 | 28.59  | 13.60 | 3.55E-02 | 27.27  | 16.48 | 9.79E-02 | 74.78   | 51.55  | 1.47E-01 | 63.69  | 45.91 | 1.65E-01 | -4.69  | 33.78 | 8.90E-01 |
| cg05905184 | 15.44  | 7.34  | 3.55E-02 | 13.13  | 7.95  | 9.85E-02 | 28.12   | 30.97  | 3.64E-01 | 4.66   | 5.92  | 4.31E-01 | 38.72  | 13.35 | 3.72E-03 |
| cg02264082 | 21.98  | 10.45 | 3.55E-02 | 27.61  | 22.95 | 2.29E-01 | 28.05   | 32.46  | 3.88E-01 | 12.87  | 14.56 | 3.77E-01 | 38.62  | 25.06 | 1.23E-01 |
| cg27341860 | -16.60 | 7.89  | 3.55E-02 | -30.69 | 16.07 | 5.62E-02 | 0.49    | 17.33  | 9.77E-01 | -12.41 | 12.06 | 3.03E-01 | -32.36 | 22.50 | 1.50E-01 |
| cg20583432 | 8.38   | 3.98  | 3.55E-02 | 2.73   | 5.50  | 6.20E-01 | 11.37   | 7.51   | 1.30E-01 | 20.24  | 8.54  | 1.78E-02 | 3.15   | 10.41 | 7.62E-01 |
| cg10504150 | 17.66  | 8.40  | 3.55E-02 | 15.11  | 17.36 | 3.84E-01 | 9.65    | 17.66  | 5.85E-01 | 16.04  | 13.20 | 2.24E-01 | 40.32  | 22.84 | 7.75E-02 |
| cg04239994 | 15.72  | 7.47  | 3.55E-02 | 21.84  | 18.46 | 2.37E-01 | 12.05   | 29.88  | 6.87E-01 | 13.90  | 9.54  | 1.45E-01 | 17.86  | 18.75 | 3.41E-01 |
| cg12832492 | -28.78 | 13.69 | 3.55E-02 | -40.79 | 43.64 | 3.50E-01 | -128.29 | 172.30 | 4.57E-01 | -26.14 | 15.14 | 8.43E-02 | -33.31 | 49.01 | 4.97E-01 |
| cg04592144 | -9.14  | 4.35  | 3.55E-02 | -5.49  | 8.22  | 5.04E-01 | -12.16  | 11.46  | 2.89E-01 | -8.88  | 6.77  | 1.90E-01 | -13.36 | 10.72 | 2.13E-01 |
| cg16545105 | 9.95   | 4.73  | 3.55E-02 | 14.49  | 6.81  | 3.35E-02 | 0.05    | 12.85  | 9.97E-01 | 9.39   | 10.52 | 3.72E-01 | 5.87   | 11.17 | 5.99E-01 |
| cg05444816 | -21.75 | 10.35 | 3.55E-02 | -21.14 | 13.74 | 1.24E-01 | 11.78   | 27.14  | 6.64E-01 | -1.78  | 30.28 | 9.53E-01 | -41.18 | 15.18 | 6.66E-03 |
| cg02755455 | 11.49  | 5.47  | 3.55E-02 | 11.99  | 12.11 | 3.22E-01 | 11.54   | 23.39  | 6.22E-01 | 14.18  | 7.15  | 4.73E-02 | 0.80   | 13.81 | 9.54E-01 |
| cg25148705 | -7.95  | 3.78  | 3.55E-02 | -13.78 | 6.31  | 2.89E-02 | -9.75   | 8.33   | 2.42E-01 | -1.90  | 6.51  | 7.70E-01 | -3.59  | 12.18 | 7.68E-01 |

|            |        |       |          |        |       |          |         |        |          |         |       |          |        |       |          |
|------------|--------|-------|----------|--------|-------|----------|---------|--------|----------|---------|-------|----------|--------|-------|----------|
| cg16372648 | -11.15 | 5.30  | 3.55E-02 | -5.88  | 11.56 | 6.11E-01 | -3.64   | 24.21  | 8.81E-01 | -11.19  | 6.88  | 1.04E-01 | -20.81 | 13.74 | 1.30E-01 |
| cg08345575 | 18.58  | 8.84  | 3.55E-02 | 27.04  | 18.10 | 1.35E-01 | 22.18   | 43.17  | 6.07E-01 | 19.00   | 11.38 | 9.48E-02 | -2.25  | 25.89 | 9.31E-01 |
| cg09607363 | 39.15  | 18.62 | 3.55E-02 | 51.64  | 22.44 | 2.14E-02 | 81.05   | 36.52  | 2.65E-02 | 4.03    | 13.11 | 7.59E-01 | 53.41  | 32.78 | 1.03E-01 |
| cg25236277 | -10.15 | 4.83  | 3.55E-02 | -8.30  | 10.93 | 4.48E-01 | -24.59  | 21.69  | 2.57E-01 | -9.40   | 5.87  | 1.09E-01 | -12.16 | 17.29 | 4.82E-01 |
| cg13465946 | 23.38  | 11.12 | 3.55E-02 | 12.38  | 15.44 | 4.22E-01 | 38.90   | 70.80  | 5.83E-01 | 95.35   | 43.69 | 2.91E-02 | 23.01  | 14.47 | 1.12E-01 |
| cg18382389 | 16.33  | 7.77  | 3.55E-02 | 31.78  | 20.02 | 1.12E-01 | 23.35   | 41.09  | 5.70E-01 | 13.03   | 8.91  | 1.44E-01 | 14.92  | 33.10 | 6.52E-01 |
| cg11876705 | -7.74  | 3.68  | 3.55E-02 | -8.63  | 7.93  | 2.77E-01 | -2.43   | 14.16  | 8.64E-01 | -6.96   | 4.84  | 1.51E-01 | -12.17 | 9.87  | 2.17E-01 |
| cg13458596 | 19.36  | 9.21  | 3.55E-02 | -2.56  | 27.42 | 9.25E-01 | 28.74   | 122.05 | 8.14E-01 | 19.94   | 10.17 | 5.00E-02 | 50.80  | 37.02 | 1.70E-01 |
| cg01813393 | 18.63  | 8.86  | 3.55E-02 | 14.09  | 17.36 | 4.17E-01 | -0.28   | 38.42  | 9.94E-01 | 21.80   | 12.01 | 6.95E-02 | 21.91  | 23.56 | 3.52E-01 |
| cg26409978 | -45.16 | 21.48 | 3.55E-02 | -50.02 | 28.27 | 7.69E-02 | 7.31    | 81.83  | 9.29E-01 | -22.24  | 56.16 | 6.92E-01 | -65.28 | 47.20 | 1.67E-01 |
| cg21721681 | 8.83   | 4.20  | 3.55E-02 | 7.68   | 5.30  | 1.47E-01 | 25.79   | 11.01  | 1.92E-02 | 0.18    | 10.36 | 9.86E-01 | 6.37   | 10.26 | 5.35E-01 |
| cg02232206 | 18.00  | 8.56  | 3.56E-02 | 41.12  | 20.16 | 4.14E-02 | 25.03   | 29.44  | 3.95E-01 | 15.96   | 9.31  | 8.64E-02 | -21.74 | 29.99 | 4.68E-01 |
| cg07261015 | 16.87  | 8.03  | 3.56E-02 | 31.22  | 15.91 | 4.98E-02 | 26.63   | 24.40  | 2.75E-01 | 9.25    | 10.87 | 3.95E-01 | 10.93  | 26.55 | 6.81E-01 |
| cg14028856 | 7.22   | 3.43  | 3.56E-02 | 8.71   | 4.43  | 4.92E-02 | 16.01   | 9.56   | 9.40E-02 | 5.20    | 10.89 | 6.33E-01 | -3.54  | 8.32  | 6.71E-01 |
| cg25679766 | -6.80  | 3.23  | 3.56E-02 | -5.76  | 4.67  | 2.17E-01 | -9.39   | 8.09   | 2.46E-01 | -3.89   | 9.80  | 6.92E-01 | -8.39  | 6.45  | 1.93E-01 |
| cg27400216 | -8.16  | 3.88  | 3.56E-02 | -19.01 | 9.14  | 3.76E-02 | 1.32    | 16.48  | 9.36E-01 | -6.72   | 4.83  | 1.64E-01 | -3.94  | 11.18 | 7.25E-01 |
| cg17397955 | 31.23  | 14.86 | 3.56E-02 | 26.29  | 35.82 | 4.63E-01 | -49.93  | 135.64 | 7.13E-01 | 30.28   | 17.00 | 7.48E-02 | 80.53  | 65.31 | 2.18E-01 |
| cg06531870 | -9.05  | 4.31  | 3.56E-02 | -5.74  | 7.38  | 4.37E-01 | -5.79   | 9.03   | 5.21E-01 | -14.18  | 8.68  | 1.02E-01 | -12.32 | 9.98  | 2.17E-01 |
| cg15459537 | -9.24  | 4.40  | 3.56E-02 | -7.05  | 8.09  | 3.84E-01 | -21.04  | 15.41  | 1.72E-01 | -6.65   | 5.96  | 2.65E-01 | -23.07 | 15.61 | 1.39E-01 |
| cg14161953 | -44.04 | 20.95 | 3.56E-02 | -37.86 | 24.59 | 1.24E-01 | -150.07 | 98.12  | 1.26E-01 | 8.74    | 69.99 | 9.01E-01 | -75.70 | 56.32 | 1.79E-01 |
| cg06515159 | 37.21  | 17.71 | 3.56E-02 | 35.75  | 18.54 | 5.37E-02 | -18.89  | 35.06  | 5.90E-01 | 94.87   | 29.79 | 1.45E-03 | 31.01  | 18.83 | 9.96E-02 |
| cg07432969 | 29.64  | 14.10 | 3.56E-02 | 28.92  | 16.92 | 8.75E-02 | 50.60   | 23.55  | 3.17E-02 | 3.28    | 10.06 | 7.44E-01 | 64.09  | 27.79 | 2.11E-02 |
| cg24838764 | -12.53 | 5.96  | 3.56E-02 | -29.74 | 11.47 | 9.49E-03 | -22.65  | 19.77  | 2.52E-01 | -6.06   | 4.54  | 1.82E-01 | -7.94  | 13.27 | 5.50E-01 |
| cg24650748 | -19.63 | 9.34  | 3.56E-02 | -4.69  | 23.21 | 8.40E-01 | -0.52   | 34.01  | 9.88E-01 | -22.95  | 11.40 | 4.41E-02 | -37.51 | 30.92 | 2.25E-01 |
| cg26364205 | 15.43  | 7.34  | 3.56E-02 | 29.07  | 12.38 | 1.88E-02 | 0.74    | 17.61  | 9.66E-01 | 24.46   | 19.42 | 2.08E-01 | 4.75   | 12.77 | 7.10E-01 |
| cg16068833 | -7.10  | 3.38  | 3.56E-02 | -5.02  | 4.71  | 2.86E-01 | -3.71   | 8.31   | 6.56E-01 | -14.08  | 9.57  | 1.41E-01 | -11.04 | 7.67  | 1.50E-01 |
| cg16599143 | -6.32  | 3.01  | 3.56E-02 | -7.14  | 5.83  | 2.21E-01 | -10.31  | 7.31   | 1.58E-01 | -5.53   | 4.75  | 2.45E-01 | -2.81  | 7.40  | 7.04E-01 |
| cg19033943 | -52.08 | 24.78 | 3.56E-02 | -50.22 | 30.11 | 9.53E-02 | 45.09   | 150.48 | 7.64E-01 | -115.43 | 70.16 | 9.99E-02 | -28.58 | 59.98 | 6.34E-01 |
| cg13152070 | -17.89 | 8.51  | 3.56E-02 | -3.82  | 17.52 | 8.28E-01 | -19.64  | 26.39  | 4.57E-01 | -19.57  | 11.52 | 8.94E-02 | -37.49 | 25.27 | 1.38E-01 |
| cg21880476 | 17.43  | 8.30  | 3.56E-02 | 19.57  | 10.47 | 6.15E-02 | 20.13   | 34.08  | 5.55E-01 | -19.71  | 35.62 | 5.80E-01 | 19.42  | 16.33 | 2.34E-01 |
| cg09922452 | 5.06   | 2.41  | 3.56E-02 | 4.73   | 3.30  | 1.51E-01 | 2.20    | 5.42   | 6.85E-01 | 0.49    | 7.69  | 9.49E-01 | 12.03  | 5.83  | 3.90E-02 |
| cg22053452 | 43.39  | 20.65 | 3.56E-02 | 54.28  | 27.11 | 4.53E-02 | -38.52  | 97.30  | 6.92E-01 | 86.19   | 82.13 | 2.94E-01 | 26.28  | 36.97 | 4.77E-01 |
| cg21533997 | 16.60  | 7.90  | 3.56E-02 | 19.78  | 13.75 | 1.50E-01 | 31.74   | 20.30  | 1.18E-01 | 10.09   | 14.42 | 4.84E-01 | 10.25  | 16.89 | 5.44E-01 |
| cg25127214 | -12.08 | 5.75  | 3.56E-02 | -21.38 | 17.46 | 2.21E-01 | 11.25   | 20.70  | 5.87E-01 | -12.45  | 6.66  | 6.16E-02 | -19.58 | 21.85 | 3.70E-01 |
| cg18014042 | -35.45 | 16.87 | 3.56E-02 | -40.37 | 22.64 | 7.46E-02 | -19.13  | 80.61  | 8.12E-01 | -43.79  | 39.25 | 2.65E-01 | -19.01 | 36.28 | 6.00E-01 |

|                 |        |       |          |        |       |          |         |        |          |        |       |          |        |       |          |
|-----------------|--------|-------|----------|--------|-------|----------|---------|--------|----------|--------|-------|----------|--------|-------|----------|
| cg04131431      | 20.19  | 9.61  | 3.56E-02 | 9.75   | 25.00 | 6.96E-01 | 38.45   | 61.53  | 5.32E-01 | 26.21  | 11.74 | 2.56E-02 | 1.62   | 24.15 | 9.47E-01 |
| cg04959480      | 10.83  | 5.15  | 3.56E-02 | 10.62  | 7.92  | 1.80E-01 | 19.04   | 12.46  | 1.27E-01 | 9.15   | 11.70 | 4.35E-01 | 6.16   | 11.20 | 5.82E-01 |
| cg20369204      | 11.41  | 5.43  | 3.56E-02 | 16.99  | 7.28  | 1.96E-02 | 13.84   | 19.08  | 4.68E-01 | -3.35  | 12.60 | 7.91E-01 | 8.23   | 12.91 | 5.24E-01 |
| cg09994114      | 16.24  | 7.73  | 3.56E-02 | 6.60   | 15.71 | 6.74E-01 | 43.27   | 20.49  | 3.47E-02 | 8.87   | 9.18  | 3.33E-01 | 32.48  | 19.85 | 1.02E-01 |
| cg19639367      | 20.64  | 9.82  | 3.56E-02 | 33.65  | 20.15 | 9.49E-02 | 25.93   | 20.26  | 2.01E-01 | 4.25   | 14.89 | 7.75E-01 | 50.78  | 32.28 | 1.16E-01 |
| cg15732657      | 11.54  | 5.49  | 3.56E-02 | 14.17  | 9.46  | 1.34E-01 | 1.82    | 15.46  | 9.06E-01 | 6.48   | 8.47  | 4.44E-01 | 32.85  | 16.14 | 4.19E-02 |
| cg23983671      | 86.50  | 41.17 | 3.56E-02 | 42.16  | 34.10 | 2.16E-01 | 200.41  | 78.65  | 1.08E-02 | 150.77 | 48.06 | 1.71E-03 | 0.00   | 52.20 | 1.00E+00 |
| cg18049164      | -6.96  | 3.31  | 3.56E-02 | -9.81  | 6.59  | 1.36E-01 | -1.98   | 9.57   | 8.36E-01 | -6.08  | 4.81  | 2.06E-01 | -8.88  | 8.46  | 2.94E-01 |
| cg04582365      | -7.60  | 3.62  | 3.56E-02 | -6.46  | 7.42  | 3.84E-01 | 3.03    | 12.27  | 8.05E-01 | -9.67  | 4.74  | 4.13E-02 | -7.50  | 11.90 | 5.28E-01 |
| cg05189127      | 7.00   | 3.33  | 3.56E-02 | 2.51   | 3.80  | 5.10E-01 | 4.58    | 5.75   | 4.26E-01 | 19.38  | 7.55  | 1.02E-02 | 9.03   | 6.38  | 1.57E-01 |
| cg10016610      | -10.27 | 4.89  | 3.56E-02 | -6.82  | 43.42 | 8.75E-01 | 0.64    | 145.67 | 9.96E-01 | -4.77  | 6.77  | 4.81E-01 | -16.54 | 7.16  | 2.10E-02 |
| cg10930502      | 20.98  | 9.98  | 3.56E-02 | 35.05  | 14.95 | 1.91E-02 | 20.73   | 16.25  | 2.02E-01 | -9.79  | 19.09 | 6.08E-01 | 34.16  | 21.70 | 1.15E-01 |
| cg08848774      | 17.57  | 8.36  | 3.56E-02 | 39.97  | 32.93 | 2.25E-01 | -3.39   | 178.22 | 9.85E-01 | 15.22  | 8.91  | 8.76E-02 | 30.62  | 36.74 | 4.05E-01 |
| cg15961219      | -7.19  | 3.42  | 3.56E-02 | -7.09  | 6.15  | 2.49E-01 | 0.50    | 11.73  | 9.66E-01 | -10.55 | 5.02  | 3.55E-02 | -0.93  | 9.17  | 9.19E-01 |
| ch.8.120063967R | -37.86 | 18.02 | 3.56E-02 | -36.73 | 22.12 | 9.67E-02 | 4.78    | 78.88  | 9.52E-01 | -69.97 | 81.29 | 3.89E-01 | -43.80 | 37.19 | 2.39E-01 |
| cg13150171      | 14.79  | 7.04  | 3.56E-02 | 27.12  | 12.53 | 3.04E-02 | 10.87   | 35.05  | 7.56E-01 | 7.09   | 10.44 | 4.97E-01 | 13.54  | 16.15 | 4.02E-01 |
| cg26474717      | -37.06 | 17.64 | 3.56E-02 | -21.98 | 25.72 | 3.93E-01 | -26.18  | 48.57  | 5.90E-01 | -69.19 | 38.02 | 6.87E-02 | -45.84 | 41.26 | 2.67E-01 |
| cg21098005      | 15.86  | 7.55  | 3.56E-02 | 8.21   | 13.31 | 5.38E-01 | 30.11   | 16.35  | 6.55E-02 | 23.13  | 11.51 | 4.45E-02 | -12.17 | 21.31 | 5.68E-01 |
| cg03438773      | 8.49   | 4.04  | 3.56E-02 | 9.58   | 5.56  | 8.49E-02 | 15.71   | 10.78  | 1.45E-01 | 9.98   | 9.88  | 3.12E-01 | -2.67  | 9.94  | 7.88E-01 |
| cg26850503      | 44.44  | 21.15 | 3.56E-02 | 56.59  | 26.32 | 3.16E-02 | -0.76   | 115.97 | 9.95E-01 | 121.10 | 74.23 | 1.03E-01 | -7.99  | 43.21 | 8.53E-01 |
| cg23553119      | -33.49 | 15.94 | 3.56E-02 | -5.98  | 56.97 | 9.16E-01 | -183.68 | 219.57 | 4.03E-01 | -35.91 | 17.72 | 4.27E-02 | -27.92 | 48.65 | 5.66E-01 |
| cg16341266      | -7.70  | 3.66  | 3.57E-02 | -16.94 | 8.69  | 5.12E-02 | 2.73    | 13.65  | 8.42E-01 | -4.87  | 4.58  | 2.88E-01 | -16.03 | 11.04 | 1.47E-01 |
| cg25430849      | 30.92  | 14.72 | 3.57E-02 | -7.87  | 46.24 | 8.65E-01 | -17.09  | 158.51 | 9.14E-01 | 34.81  | 16.39 | 3.37E-02 | 45.24  | 50.83 | 3.73E-01 |
| cg15053937      | 21.16  | 10.07 | 3.57E-02 | 32.72  | 21.71 | 1.32E-01 | 23.49   | 36.75  | 5.23E-01 | 12.43  | 13.10 | 3.43E-01 | 42.25  | 29.27 | 1.49E-01 |
| cg17751569      | 15.76  | 7.50  | 3.57E-02 | 30.38  | 14.30 | 3.36E-02 | -4.83   | 16.20  | 7.66E-01 | 20.01  | 10.67 | 6.07E-02 | 1.62   | 23.16 | 9.44E-01 |
| cg00217795      | 5.35   | 2.55  | 3.57E-02 | 5.24   | 3.69  | 1.55E-01 | 7.63    | 6.67   | 2.53E-01 | 1.22   | 6.65  | 8.54E-01 | 6.77   | 5.32  | 2.03E-01 |
| cg20285128      | 17.50  | 8.33  | 3.57E-02 | 47.37  | 24.95 | 5.76E-02 | -11.81  | 41.97  | 7.78E-01 | 11.74  | 10.23 | 2.51E-01 | 26.25  | 19.27 | 1.73E-01 |
| cg09717261      | 36.15  | 17.21 | 3.57E-02 | 27.33  | 20.54 | 1.83E-01 | 103.83  | 88.92  | 2.43E-01 | 109.06 | 75.08 | 1.46E-01 | 35.32  | 37.75 | 3.50E-01 |
| cg09179347      | 20.31  | 9.67  | 3.57E-02 | 17.04  | 20.09 | 3.96E-01 | 10.79   | 20.86  | 6.05E-01 | 22.46  | 14.79 | 1.29E-01 | 35.29  | 27.22 | 1.95E-01 |
| cg24310786      | -15.45 | 7.35  | 3.57E-02 | -28.67 | 10.68 | 7.28E-03 | 4.80    | 15.50  | 7.57E-01 | -8.82  | 14.00 | 5.29E-01 | -19.04 | 15.71 | 2.26E-01 |
| cg26671183      | 26.26  | 12.50 | 3.57E-02 | 36.13  | 23.29 | 1.21E-01 | 32.85   | 80.86  | 6.85E-01 | 17.90  | 16.45 | 2.76E-01 | 42.86  | 37.67 | 2.55E-01 |
| cg16205375      | -11.46 | 5.46  | 3.57E-02 | -17.38 | 10.24 | 8.98E-02 | -9.46   | 8.55   | 2.69E-01 | -11.15 | 10.70 | 2.97E-01 | 4.54   | 24.70 | 8.54E-01 |
| cg06967016      | 15.49  | 7.37  | 3.57E-02 | 14.57  | 18.65 | 4.35E-01 | -10.93  | 39.73  | 7.83E-01 | 13.89  | 8.73  | 1.11E-01 | 38.44  | 23.86 | 1.07E-01 |
| cg07544189      | -8.06  | 3.84  | 3.57E-02 | -11.86 | 7.39  | 1.08E-01 | -2.41   | 9.31   | 7.96E-01 | -9.41  | 6.08  | 1.22E-01 | -4.33  | 9.52  | 6.49E-01 |
| cg06054026      | 19.29  | 9.19  | 3.57E-02 | 10.25  | 9.55  | 2.83E-01 | 7.76    | 22.73  | 7.33E-01 | 61.53  | 22.60 | 6.46E-03 | 17.90  | 12.18 | 1.42E-01 |

|            |        |       |          |        |       |          |        |        |          |        |       |          |         |       |          |
|------------|--------|-------|----------|--------|-------|----------|--------|--------|----------|--------|-------|----------|---------|-------|----------|
| cg24532083 | -8.98  | 4.28  | 3.57E-02 | -7.28  | 6.05  | 2.29E-01 | -23.28 | 11.19  | 3.75E-02 | 0.92   | 11.30 | 9.35E-01 | -9.84   | 9.30  | 2.90E-01 |
| cg11885433 | 15.69  | 7.47  | 3.57E-02 | 10.12  | 11.10 | 3.62E-01 | 23.87  | 14.88  | 1.09E-01 | -2.15  | 24.98 | 9.31E-01 | 25.72   | 16.48 | 1.19E-01 |
| cg16474722 | 17.12  | 8.15  | 3.57E-02 | 23.69  | 13.53 | 8.00E-02 | 17.30  | 16.23  | 2.86E-01 | -5.32  | 16.69 | 7.50E-01 | 37.17   | 21.33 | 8.14E-02 |
| cg05985576 | 12.69  | 6.04  | 3.57E-02 | 12.19  | 11.93 | 3.07E-01 | 7.26   | 14.95  | 6.27E-01 | 12.53  | 8.95  | 1.62E-01 | 21.44   | 17.13 | 2.11E-01 |
| cg15720500 | -6.70  | 3.19  | 3.57E-02 | -9.92  | 6.02  | 9.95E-02 | -6.54  | 7.41   | 3.77E-01 | -4.17  | 5.10  | 4.13E-01 | -7.56   | 8.49  | 3.73E-01 |
| cg12142062 | -16.95 | 8.07  | 3.57E-02 | -27.60 | 14.54 | 5.76E-02 | -3.12  | 14.73  | 8.32E-01 | -10.57 | 17.43 | 5.44E-01 | -29.48  | 19.13 | 1.23E-01 |
| cg10613252 | 21.80  | 10.38 | 3.57E-02 | 8.88   | 29.36 | 7.62E-01 | -10.26 | 150.28 | 9.46E-01 | 29.19  | 11.62 | 1.20E-02 | -35.59  | 38.71 | 3.58E-01 |
| cg11793562 | -25.45 | 12.12 | 3.57E-02 | -32.94 | 14.98 | 2.79E-02 | -6.60  | 42.68  | 8.77E-01 | 13.50  | 79.50 | 8.65E-01 | -15.25  | 24.63 | 5.36E-01 |
| cg11785832 | -54.91 | 26.14 | 3.57E-02 | -45.12 | 33.55 | 1.79E-01 | -47.86 | 87.52  | 5.84E-01 | -19.14 | 73.37 | 7.94E-01 | -117.78 | 62.19 | 5.82E-02 |
| cg07159230 | 10.41  | 4.96  | 3.57E-02 | 8.53   | 7.05  | 2.27E-01 | 15.59  | 12.16  | 2.00E-01 | 15.96  | 16.49 | 3.33E-01 | 8.67    | 9.91  | 3.82E-01 |
| cg17410431 | -19.77 | 9.41  | 3.57E-02 | -24.13 | 16.18 | 1.36E-01 | -71.29 | 37.88  | 5.98E-02 | -19.58 | 10.63 | 6.56E-02 | 10.51   | 24.21 | 6.64E-01 |
| cg13177195 | 13.05  | 6.21  | 3.57E-02 | 10.98  | 12.86 | 3.93E-01 | -3.51  | 19.01  | 8.54E-01 | 16.08  | 8.19  | 4.97E-02 | 19.08   | 21.39 | 3.72E-01 |
| cg01662455 | 11.44  | 5.45  | 3.57E-02 | 7.96   | 7.44  | 2.85E-01 | 18.82  | 13.15  | 1.52E-01 | 25.63  | 16.27 | 1.15E-01 | 5.94    | 12.84 | 6.44E-01 |
| cg13414212 | 16.99  | 8.09  | 3.57E-02 | 24.64  | 15.40 | 1.10E-01 | 18.16  | 22.00  | 4.09E-01 | 16.31  | 17.24 | 3.44E-01 | 11.23   | 13.31 | 3.99E-01 |
| cg09944325 | 28.33  | 13.49 | 3.57E-02 | 82.06  | 33.51 | 1.43E-02 | 13.58  | 155.35 | 9.30E-01 | 20.02  | 13.19 | 1.29E-01 | 8.39    | 42.99 | 8.45E-01 |
| cg16054278 | -20.38 | 9.70  | 3.57E-02 | -7.56  | 24.32 | 7.56E-01 | -19.59 | 47.28  | 6.79E-01 | -24.41 | 11.37 | 3.18E-02 | -8.17   | 36.53 | 8.23E-01 |
| cg23641305 | -7.87  | 3.75  | 3.57E-02 | -10.34 | 6.54  | 1.14E-01 | 4.33   | 10.50  | 6.80E-01 | -10.64 | 6.34  | 9.34E-02 | -6.71   | 8.49  | 4.29E-01 |
| cg16394290 | 7.61   | 3.62  | 3.57E-02 | 10.74  | 4.81  | 2.57E-02 | 11.63  | 9.33   | 2.13E-01 | -2.20  | 10.84 | 8.39E-01 | 0.07    | 8.80  | 9.93E-01 |
| cg14431547 | 11.80  | 5.62  | 3.57E-02 | 16.42  | 7.77  | 3.47E-02 | 13.72  | 14.06  | 3.29E-01 | -4.21  | 27.60 | 8.79E-01 | 4.35    | 10.70 | 6.84E-01 |
| cg26803289 | -11.90 | 5.67  | 3.57E-02 | -14.41 | 11.85 | 2.24E-01 | -8.84  | 16.21  | 5.85E-01 | -9.82  | 7.86  | 2.12E-01 | -18.69  | 15.73 | 2.35E-01 |
| cg00379648 | 13.77  | 6.56  | 3.57E-02 | 20.44  | 13.63 | 1.34E-01 | -9.32  | 26.17  | 7.22E-01 | 15.72  | 8.90  | 7.75E-02 | 6.70    | 16.27 | 6.80E-01 |
| cg26668272 | 16.94  | 8.07  | 3.57E-02 | 15.72  | 15.81 | 3.20E-01 | 29.88  | 13.46  | 2.64E-02 | -5.67  | 18.19 | 7.55E-01 | 17.56   | 18.80 | 3.50E-01 |
| cg16136338 | 22.22  | 10.58 | 3.57E-02 | -11.16 | 28.29 | 6.93E-01 | 40.21  | 116.41 | 7.30E-01 | 28.09  | 12.14 | 2.07E-02 | 22.95   | 34.91 | 5.11E-01 |
| cg11155016 | 15.57  | 7.41  | 3.57E-02 | 16.46  | 15.96 | 3.02E-01 | -21.55 | 35.73  | 5.46E-01 | 15.17  | 9.13  | 9.65E-02 | 36.02   | 25.97 | 1.65E-01 |
| cg22933058 | -4.95  | 2.36  | 3.57E-02 | -4.53  | 3.19  | 1.55E-01 | -10.11 | 5.04   | 4.50E-02 | -0.28  | 8.74  | 9.75E-01 | -1.48   | 5.88  | 8.01E-01 |
| cg06670911 | 20.94  | 9.97  | 3.57E-02 | 41.01  | 23.35 | 7.90E-02 | 11.51  | 81.40  | 8.88E-01 | 14.25  | 12.39 | 2.50E-01 | 26.15   | 25.31 | 3.02E-01 |
| cg14948434 | -13.87 | 6.61  | 3.57E-02 | -13.55 | 10.65 | 2.03E-01 | 4.45   | 17.55  | 8.00E-01 | -22.07 | 13.32 | 9.76E-02 | -16.95  | 13.84 | 2.21E-01 |
| cg04233201 | -10.40 | 4.95  | 3.57E-02 | -10.61 | 9.44  | 2.61E-01 | 15.15  | 17.52  | 3.87E-01 | -15.46 | 7.41  | 3.71E-02 | -9.06   | 11.13 | 4.16E-01 |
| cg20967585 | 6.11   | 2.91  | 3.57E-02 | 7.28   | 4.21  | 8.39E-02 | -1.24  | 7.06   | 8.60E-01 | 6.52   | 12.49 | 6.01E-01 | 8.35    | 5.32  | 1.17E-01 |
| cg21960303 | -15.51 | 7.38  | 3.58E-02 | -17.38 | 12.19 | 1.54E-01 | -2.67  | 15.48  | 8.63E-01 | -7.47  | 15.84 | 6.37E-01 | -36.65  | 17.02 | 3.13E-02 |
| cg00833352 | 27.81  | 13.25 | 3.58E-02 | 34.96  | 19.05 | 6.65E-02 | 40.03  | 49.88  | 4.22E-01 | 68.43  | 52.34 | 1.91E-01 | 9.71    | 21.43 | 6.50E-01 |
| cg25550425 | -12.88 | 6.14  | 3.58E-02 | -25.53 | 10.62 | 1.62E-02 | -3.35  | 13.54  | 8.04E-01 | -10.64 | 13.51 | 4.31E-01 | -5.81   | 12.16 | 6.33E-01 |
| cg20451636 | 21.22  | 10.10 | 3.58E-02 | 46.86  | 21.00 | 2.56E-02 | 11.07  | 21.11  | 6.00E-01 | 10.13  | 15.70 | 5.19E-01 | 29.04   | 28.58 | 3.09E-01 |
| cg04744624 | 11.77  | 5.60  | 3.58E-02 | 13.02  | 8.79  | 1.39E-01 | 13.22  | 14.20  | 3.52E-01 | 21.53  | 12.25 | 7.90E-02 | -0.38   | 11.72 | 9.74E-01 |
| cg10269439 | -10.49 | 5.00  | 3.58E-02 | -16.72 | 11.03 | 1.30E-01 | 4.87   | 22.95  | 8.32E-01 | -11.23 | 6.10  | 6.57E-02 | 3.03    | 17.96 | 8.66E-01 |

|            |        |       |          |        |       |          |        |        |          |        |       |          |        |       |          |
|------------|--------|-------|----------|--------|-------|----------|--------|--------|----------|--------|-------|----------|--------|-------|----------|
| cg26585899 | 5.74   | 2.73  | 3.58E-02 | 3.08   | 4.44  | 4.88E-01 | 9.93   | 6.80   | 1.44E-01 | 7.26   | 4.54  | 1.10E-01 | 3.51   | 8.79  | 6.90E-01 |
| cg12489736 | -34.41 | 16.39 | 3.58E-02 | -39.45 | 20.64 | 5.59E-02 | -34.41 | 49.70  | 4.89E-01 | -36.91 | 71.73 | 6.07E-01 | -18.52 | 35.90 | 6.06E-01 |
| cg10078540 | -6.44  | 3.07  | 3.58E-02 | -7.40  | 4.26  | 8.25E-02 | -1.96  | 6.51   | 7.63E-01 | -1.89  | 13.59 | 8.90E-01 | -9.90  | 6.70  | 1.39E-01 |
| cg26216323 | 7.12   | 3.39  | 3.58E-02 | 8.37   | 5.36  | 1.18E-01 | 7.72   | 7.35   | 2.93E-01 | 10.88  | 6.08  | 7.37E-02 | -9.91  | 10.52 | 3.46E-01 |
| cg23335304 | 21.17  | 10.08 | 3.58E-02 | 24.96  | 25.20 | 3.22E-01 | 23.09  | 30.50  | 4.49E-01 | 15.07  | 12.41 | 2.25E-01 | 66.60  | 37.95 | 7.92E-02 |
| cg25504443 | 26.74  | 12.74 | 3.58E-02 | 31.95  | 17.20 | 6.33E-02 | -7.78  | 52.21  | 8.81E-01 | 38.16  | 44.15 | 3.87E-01 | 21.08  | 22.92 | 3.58E-01 |
| cg15686615 | 9.07   | 4.32  | 3.58E-02 | 6.99   | 5.80  | 2.29E-01 | 22.02  | 11.55  | 5.65E-02 | 6.51   | 10.31 | 5.28E-01 | 7.47   | 11.96 | 5.32E-01 |
| cg13943355 | -17.33 | 8.26  | 3.58E-02 | -14.80 | 11.59 | 2.02E-01 | 2.59   | 23.42  | 9.12E-01 | -28.59 | 14.75 | 5.25E-02 | -21.59 | 35.16 | 5.39E-01 |
| cg02388788 | -11.47 | 5.46  | 3.58E-02 | -8.26  | 12.06 | 4.93E-01 | -17.64 | 21.52  | 4.12E-01 | -6.76  | 7.19  | 3.48E-01 | -30.74 | 13.91 | 2.71E-02 |
| cg23524048 | -15.84 | 7.55  | 3.58E-02 | -33.34 | 15.34 | 2.97E-02 | -0.74  | 15.66  | 9.62E-01 | -12.89 | 11.70 | 2.71E-01 | -20.43 | 22.79 | 3.70E-01 |
| cg13978542 | 18.13  | 8.64  | 3.58E-02 | 25.62  | 15.76 | 1.04E-01 | 14.90  | 15.00  | 3.20E-01 | 14.48  | 18.09 | 4.23E-01 | 15.63  | 23.05 | 4.98E-01 |
| cg26001902 | 9.50   | 4.52  | 3.58E-02 | 13.92  | 13.09 | 2.88E-01 | 9.67   | 24.67  | 6.95E-01 | 11.62  | 5.77  | 4.40E-02 | 1.58   | 9.38  | 8.66E-01 |
| cg02261408 | 20.35  | 9.70  | 3.58E-02 | 20.04  | 19.25 | 2.98E-01 | 16.93  | 18.17  | 3.51E-01 | 14.05  | 16.99 | 4.08E-01 | 43.20  | 26.30 | 1.00E-01 |
| cg10176667 | 51.89  | 24.72 | 3.58E-02 | 74.40  | 33.85 | 2.79E-02 | 24.27  | 76.70  | 7.52E-01 | -0.89  | 52.76 | 9.87E-01 | 69.03  | 65.33 | 2.91E-01 |
| cg22145318 | -11.06 | 5.27  | 3.58E-02 | -1.22  | 8.02  | 8.79E-01 | -2.21  | 13.35  | 8.69E-01 | -20.06 | 5.65  | 3.84E-04 | -11.99 | 11.04 | 2.78E-01 |
| cg20267897 | -14.28 | 6.80  | 3.58E-02 | -23.30 | 20.49 | 2.55E-01 | 33.45  | 39.56  | 3.98E-01 | -17.63 | 7.75  | 2.29E-02 | 10.20  | 22.90 | 6.56E-01 |
| cg24085426 | 17.80  | 8.48  | 3.58E-02 | 21.51  | 17.92 | 2.30E-01 | -22.58 | 34.14  | 5.08E-01 | 25.09  | 11.06 | 2.33E-02 | -3.02  | 23.90 | 8.99E-01 |
| cg02620769 | 35.23  | 16.78 | 3.58E-02 | 49.60  | 18.36 | 6.91E-03 | 48.84  | 74.86  | 5.14E-01 | 52.61  | 36.32 | 1.47E-01 | -18.88 | 33.41 | 5.72E-01 |
| cg01599714 | 7.01   | 3.34  | 3.58E-02 | 7.56   | 4.41  | 8.67E-02 | 12.46  | 6.36   | 4.99E-02 | -3.17  | 17.25 | 8.54E-01 | -5.79  | 9.98  | 5.62E-01 |
| cg08219213 | 10.99  | 5.23  | 3.58E-02 | 21.03  | 13.69 | 1.24E-01 | 37.69  | 41.98  | 3.69E-01 | 8.36   | 6.01  | 1.64E-01 | 12.42  | 18.64 | 5.05E-01 |
| cg19288027 | -34.80 | 16.58 | 3.58E-02 | -42.26 | 21.52 | 4.96E-02 | -0.68  | 45.98  | 9.88E-01 | 9.33   | 70.24 | 8.94E-01 | -46.00 | 35.28 | 1.92E-01 |
| cg02349638 | 32.85  | 15.65 | 3.58E-02 | 3.68   | 45.90 | 9.36E-01 | 55.00  | 162.40 | 7.35E-01 | 38.17  | 17.40 | 2.82E-02 | 15.64  | 61.47 | 7.99E-01 |
| cg09430391 | 25.00  | 11.91 | 3.58E-02 | 17.03  | 10.66 | 1.10E-01 | 77.35  | 44.17  | 7.99E-02 | 82.87  | 44.10 | 6.03E-02 | 15.00  | 18.24 | 4.11E-01 |
| cg09329936 | -11.11 | 5.29  | 3.58E-02 | -25.69 | 10.09 | 1.09E-02 | -4.92  | 13.67  | 7.19E-01 | -5.18  | 8.59  | 5.46E-01 | -6.85  | 11.99 | 5.68E-01 |
| cg17398227 | 8.26   | 3.94  | 3.58E-02 | 5.41   | 5.33  | 3.11E-01 | 12.86  | 8.45   | 1.28E-01 | 13.11  | 13.39 | 3.27E-01 | 9.16   | 10.10 | 3.65E-01 |
| cg21308760 | -15.30 | 7.29  | 3.58E-02 | -28.72 | 21.87 | 1.89E-01 | -11.59 | 48.52  | 8.11E-01 | -15.79 | 8.15  | 5.25E-02 | 12.07  | 28.37 | 6.70E-01 |
| cg19595244 | 5.84   | 2.78  | 3.58E-02 | 6.28   | 3.63  | 8.34E-02 | 8.26   | 7.37   | 2.62E-01 | 7.43   | 8.08  | 3.58E-01 | 0.59   | 7.16  | 9.34E-01 |
| cg01263222 | 23.32  | 11.11 | 3.58E-02 | 8.91   | 13.99 | 5.24E-01 | 55.38  | 32.09  | 8.44E-02 | 29.42  | 47.95 | 5.40E-01 | 47.13  | 24.63 | 5.57E-02 |
| cg20085268 | 7.30   | 3.48  | 3.58E-02 | 9.68   | 5.27  | 6.63E-02 | 0.47   | 10.75  | 9.65E-01 | 4.73   | 6.76  | 4.84E-01 | 9.20   | 7.91  | 2.45E-01 |
| cg03778788 | 27.18  | 12.95 | 3.58E-02 | 47.29  | 35.55 | 1.83E-01 | 84.70  | 103.68 | 4.14E-01 | 20.53  | 14.74 | 1.64E-01 | 46.91  | 45.96 | 3.07E-01 |
| cg27565277 | -10.37 | 4.94  | 3.58E-02 | -17.07 | 8.11  | 3.52E-02 | -3.24  | 11.89  | 7.85E-01 | -12.29 | 10.35 | 2.35E-01 | -2.93  | 10.35 | 7.77E-01 |
| cg10613546 | -10.31 | 4.91  | 3.59E-02 | -13.06 | 7.01  | 6.24E-02 | 2.41   | 11.43  | 8.33E-01 | -4.26  | 16.63 | 7.98E-01 | -16.73 | 10.09 | 9.71E-02 |
| cg27547283 | 39.68  | 18.91 | 3.59E-02 | -28.47 | 60.60 | 6.38E-01 | 77.48  | 262.60 | 7.68E-01 | 52.07  | 21.02 | 1.33E-02 | -0.86  | 63.65 | 9.89E-01 |
| cg09118048 | 19.11  | 9.11  | 3.59E-02 | 26.60  | 16.73 | 1.12E-01 | 14.23  | 19.54  | 4.67E-01 | 10.47  | 14.79 | 4.79E-01 | 38.79  | 27.77 | 1.62E-01 |
| cg23402769 | 24.97  | 11.90 | 3.59E-02 | 15.55  | 15.73 | 3.23E-01 | 26.89  | 31.50  | 3.93E-01 | 51.47  | 59.67 | 3.88E-01 | 41.53  | 24.02 | 8.38E-02 |



|            |        |       |          |        |       |          |         |        |          |        |       |          |        |       |          |
|------------|--------|-------|----------|--------|-------|----------|---------|--------|----------|--------|-------|----------|--------|-------|----------|
| cg02053566 | 38.37  | 18.28 | 3.59E-02 | 35.38  | 22.19 | 1.11E-01 | -113.68 | 111.11 | 3.06E-01 | 101.33 | 85.96 | 2.38E-01 | 51.62  | 36.67 | 1.59E-01 |
| cg09284106 | 18.22  | 8.68  | 3.59E-02 | 45.81  | 21.97 | 3.70E-02 | 19.85   | 24.95  | 4.26E-01 | 10.62  | 10.92 | 3.31E-01 | 21.55  | 28.95 | 4.57E-01 |
| cg03698009 | 25.95  | 12.37 | 3.59E-02 | 18.53  | 21.91 | 3.98E-01 | 9.02    | 45.46  | 8.43E-01 | 71.90  | 30.60 | 1.88E-02 | 17.19  | 18.57 | 3.55E-01 |
| cg08203210 | 8.23   | 3.92  | 3.59E-02 | -2.88  | 8.22  | 7.26E-01 | 10.27   | 13.74  | 4.55E-01 | 11.81  | 4.95  | 1.71E-02 | 10.13  | 15.60 | 5.16E-01 |
| cg25427871 | 7.72   | 3.68  | 3.59E-02 | 7.59   | 5.76  | 1.88E-01 | 10.78   | 6.76   | 1.11E-01 | 15.97  | 10.35 | 1.23E-01 | -3.39  | 8.90  | 7.03E-01 |
| cg21218059 | -29.68 | 14.15 | 3.59E-02 | -61.22 | 43.48 | 1.59E-01 | 137.67  | 176.04 | 4.34E-01 | -30.68 | 15.78 | 5.19E-02 | 6.62   | 48.73 | 8.92E-01 |
| cg15769726 | 29.84  | 14.22 | 3.59E-02 | 51.30  | 19.62 | 8.93E-03 | -5.15   | 25.78  | 8.42E-01 | 13.34  | 34.92 | 7.02E-01 | 45.11  | 30.62 | 1.41E-01 |
| cg08644980 | 17.83  | 8.50  | 3.59E-02 | 15.90  | 14.94 | 2.87E-01 | 30.54   | 16.79  | 6.89E-02 | -1.42  | 17.32 | 9.35E-01 | 28.92  | 20.03 | 1.49E-01 |
| cg21667367 | 8.65   | 4.12  | 3.59E-02 | 5.01   | 5.80  | 3.87E-01 | 18.39   | 8.53   | 3.11E-02 | 15.71  | 9.73  | 1.07E-01 | -0.87  | 9.36  | 9.26E-01 |
| cg03410223 | -22.50 | 10.73 | 3.59E-02 | -28.50 | 11.62 | 1.42E-02 | -24.48  | 56.08  | 6.63E-01 | 53.00  | 54.50 | 3.31E-01 | 8.58   | 39.79 | 8.29E-01 |
| cg07222900 | 20.67  | 9.85  | 3.59E-02 | 40.45  | 18.30 | 2.71E-02 | -22.71  | 36.29  | 5.31E-01 | 20.17  | 14.05 | 1.51E-01 | 4.88   | 25.85 | 8.50E-01 |
| cg17317859 | -8.34  | 3.97  | 3.59E-02 | -2.05  | 9.13  | 8.23E-01 | -7.25   | 13.35  | 5.87E-01 | -9.83  | 5.05  | 5.15E-02 | -11.94 | 12.48 | 3.39E-01 |
| cg25876319 | 22.65  | 10.79 | 3.59E-02 | 18.51  | 19.30 | 3.38E-01 | 46.14   | 21.33  | 3.05E-02 | 1.60   | 16.91 | 9.25E-01 | 42.79  | 27.02 | 1.13E-01 |
| cg00366237 | 54.39  | 25.93 | 3.59E-02 | 38.96  | 29.31 | 1.84E-01 | -33.55  | 76.65  | 6.62E-01 | 150.44 | 83.10 | 7.02E-02 | 87.67  | 46.17 | 5.76E-02 |
| cg12323063 | 6.43   | 3.07  | 3.59E-02 | 7.81   | 4.29  | 6.85E-02 | 7.03    | 8.39   | 4.03E-01 | 6.93   | 6.67  | 2.99E-01 | 0.26   | 8.09  | 9.75E-01 |
| cg04787750 | 21.38  | 10.19 | 3.59E-02 | 14.92  | 18.98 | 4.32E-01 | 25.05   | 19.80  | 2.06E-01 | 23.98  | 18.47 | 1.94E-01 | 22.06  | 26.99 | 4.14E-01 |
| cg01675229 | -29.96 | 14.28 | 3.59E-02 | -24.68 | 18.63 | 1.85E-01 | -48.29  | 80.05  | 5.46E-01 | -53.34 | 62.41 | 3.93E-01 | -33.94 | 24.95 | 1.74E-01 |
| cg00685723 | 41.28  | 19.68 | 3.59E-02 | 26.80  | 25.32 | 2.90E-01 | 110.23  | 63.02  | 8.03E-02 | -27.83 | 81.22 | 7.32E-01 | 66.65  | 40.20 | 9.73E-02 |
| cg13356540 | -16.01 | 7.63  | 3.59E-02 | -27.06 | 12.57 | 3.13E-02 | 5.28    | 14.93  | 7.24E-01 | -26.16 | 13.90 | 5.98E-02 | -10.35 | 15.94 | 5.16E-01 |
| cg00382185 | 18.96  | 9.04  | 3.59E-02 | 33.41  | 14.90 | 2.49E-02 | 8.57    | 19.41  | 6.59E-01 | 1.48   | 15.25 | 9.23E-01 | 38.09  | 22.78 | 9.45E-02 |
| cg19172278 | -6.76  | 3.22  | 3.59E-02 | -10.53 | 4.44  | 1.77E-02 | -0.33   | 8.16   | 9.67E-01 | -4.36  | 10.26 | 6.71E-01 | -3.34  | 6.92  | 6.30E-01 |
| cg10510558 | -14.68 | 7.00  | 3.59E-02 | 3.00   | 19.95 | 8.80E-01 | -11.54  | 26.38  | 6.62E-01 | -16.90 | 8.08  | 3.64E-02 | -27.92 | 29.71 | 3.47E-01 |
| cg17767567 | 14.07  | 6.71  | 3.59E-02 | 35.29  | 19.08 | 6.43E-02 | 36.72   | 24.62  | 1.36E-01 | 9.42   | 7.86  | 2.31E-01 | 1.63   | 24.67 | 9.47E-01 |
| cg16695483 | 28.39  | 13.53 | 3.59E-02 | 42.38  | 30.38 | 1.63E-01 | 30.66   | 67.72  | 6.51E-01 | 18.59  | 17.12 | 2.78E-01 | 52.11  | 36.56 | 1.54E-01 |
| cg05744184 | 7.35   | 3.50  | 3.59E-02 | 7.97   | 4.18  | 5.64E-02 | 13.98   | 10.21  | 1.71E-01 | -3.24  | 12.14 | 7.89E-01 | 3.85   | 11.33 | 7.34E-01 |
| cg21844291 | -12.17 | 5.80  | 3.59E-02 | -19.02 | 12.02 | 1.14E-01 | -5.25   | 13.55  | 6.98E-01 | -12.36 | 8.94  | 1.67E-01 | -9.64  | 14.40 | 5.03E-01 |
| cg23275958 | 9.44   | 4.50  | 3.59E-02 | 13.27  | 8.08  | 1.00E-01 | 19.58   | 9.22   | 3.37E-02 | 3.01   | 9.05  | 7.39E-01 | -0.47  | 9.98  | 9.62E-01 |
| cg21432954 | 15.97  | 7.61  | 3.59E-02 | 18.34  | 12.16 | 1.31E-01 | 33.80   | 22.76  | 1.37E-01 | 29.33  | 22.46 | 1.92E-01 | 4.27   | 12.33 | 7.29E-01 |
| cg00585558 | 16.13  | 7.69  | 3.59E-02 | 25.32  | 10.68 | 1.77E-02 | -12.36  | 32.62  | 7.05E-01 | 35.92  | 43.00 | 4.03E-01 | 6.44   | 12.26 | 6.00E-01 |
| cg13982220 | 16.90  | 8.06  | 3.59E-02 | 18.52  | 13.49 | 1.70E-01 | 20.39   | 14.82  | 1.69E-01 | 13.73  | 17.66 | 4.37E-01 | 10.09  | 21.54 | 6.39E-01 |
| cg07310259 | 19.38  | 9.24  | 3.59E-02 | 22.81  | 11.96 | 5.65E-02 | 60.34   | 58.85  | 3.05E-01 | 4.09   | 48.88 | 9.33E-01 | 12.06  | 15.78 | 4.45E-01 |
| cg01377459 | -15.00 | 7.15  | 3.60E-02 | -29.87 | 17.75 | 9.24E-02 | -14.57  | 27.83  | 6.01E-01 | -14.04 | 8.63  | 1.04E-01 | 5.39   | 24.58 | 8.26E-01 |
| cg27348370 | -9.07  | 4.33  | 3.60E-02 | 5.97   | 10.23 | 5.60E-01 | -14.03  | 18.53  | 4.49E-01 | -11.42 | 5.32  | 3.20E-02 | -17.24 | 13.24 | 1.93E-01 |
| cg24032156 | 16.37  | 7.80  | 3.60E-02 | 15.71  | 12.09 | 1.94E-01 | 12.23   | 15.19  | 4.20E-01 | 18.89  | 19.37 | 3.29E-01 | 22.47  | 19.72 | 2.54E-01 |
| cg02206323 | -12.14 | 5.79  | 3.60E-02 | -5.35  | 10.44 | 6.08E-01 | -12.33  | 13.07  | 3.45E-01 | -21.30 | 12.38 | 8.53E-02 | -12.32 | 10.99 | 2.62E-01 |

|            |        |       |          |        |       |          |        |        |          |        |       |          |        |       |          |
|------------|--------|-------|----------|--------|-------|----------|--------|--------|----------|--------|-------|----------|--------|-------|----------|
| cg25791868 | -14.78 | 7.04  | 3.60E-02 | -10.03 | 13.55 | 4.59E-01 | -17.45 | 19.36  | 3.67E-01 | -12.81 | 9.94  | 1.97E-01 | -34.98 | 22.88 | 1.26E-01 |
| cg11907323 | -8.23  | 3.92  | 3.60E-02 | -11.92 | 10.17 | 2.41E-01 | 6.84   | 13.52  | 6.13E-01 | -7.63  | 4.77  | 1.10E-01 | -20.56 | 12.99 | 1.13E-01 |
| cg27539721 | 50.22  | 23.94 | 3.60E-02 | 70.00  | 36.18 | 5.30E-02 | 48.62  | 98.36  | 6.21E-01 | 98.69  | 47.06 | 3.60E-02 | -2.60  | 37.26 | 9.44E-01 |
| cg11559250 | 29.77  | 14.19 | 3.60E-02 | 28.12  | 19.32 | 1.46E-01 | -0.93  | 54.14  | 9.86E-01 | 114.82 | 53.87 | 3.30E-02 | 20.76  | 25.01 | 4.06E-01 |
| cg20497635 | 5.40   | 2.57  | 3.60E-02 | 4.45   | 3.22  | 1.68E-01 | 11.38  | 6.32   | 7.18E-02 | 4.75   | 8.28  | 5.66E-01 | 2.15   | 8.20  | 7.93E-01 |
| cg27056145 | 18.72  | 8.93  | 3.60E-02 | 22.85  | 20.86 | 2.73E-01 | 23.16  | 40.42  | 5.67E-01 | 11.65  | 10.84 | 2.83E-01 | 61.53  | 29.84 | 3.92E-02 |
| cg01640684 | -3.31  | 1.58  | 3.60E-02 | -3.75  | 2.21  | 8.95E-02 | -3.72  | 2.92   | 2.03E-01 | -0.22  | 7.95  | 9.78E-01 | -1.90  | 3.99  | 6.34E-01 |
| cg07841312 | 28.29  | 13.49 | 3.60E-02 | 14.65  | 47.93 | 7.60E-01 | 236.93 | 203.04 | 2.43E-01 | 24.33  | 14.64 | 9.66E-02 | 80.62  | 51.98 | 1.21E-01 |
| cg09321029 | 14.53  | 6.93  | 3.60E-02 | 16.41  | 10.16 | 1.06E-01 | 18.81  | 13.75  | 1.71E-01 | 11.25  | 22.97 | 6.24E-01 | 5.81   | 15.84 | 7.14E-01 |
| cg22878148 | -10.52 | 5.02  | 3.60E-02 | -20.42 | 11.48 | 7.53E-02 | 16.90  | 18.45  | 3.60E-01 | -12.27 | 4.61  | 7.74E-03 | -1.50  | 15.36 | 9.22E-01 |
| cg21088542 | -10.02 | 4.78  | 3.60E-02 | -22.43 | 11.18 | 4.49E-02 | 3.26   | 20.78  | 8.75E-01 | -6.23  | 5.90  | 2.91E-01 | -18.40 | 14.44 | 2.03E-01 |
| cg00264419 | -12.64 | 6.03  | 3.60E-02 | -25.21 | 13.77 | 6.71E-02 | -16.93 | 15.96  | 2.89E-01 | -6.28  | 8.09  | 4.37E-01 | -17.26 | 18.13 | 3.41E-01 |
| cg20826165 | -10.71 | 5.11  | 3.60E-02 | -20.52 | 13.72 | 1.35E-01 | -22.48 | 23.50  | 3.39E-01 | -7.53  | 5.91  | 2.02E-01 | -17.36 | 19.56 | 3.75E-01 |
| cg08130912 | 8.72   | 4.16  | 3.60E-02 | 9.76   | 5.95  | 1.01E-01 | 15.86  | 10.70  | 1.38E-01 | 12.90  | 9.40  | 1.70E-01 | -5.79  | 10.21 | 5.70E-01 |
| cg20564969 | 19.67  | 9.38  | 3.60E-02 | 24.38  | 12.36 | 4.85E-02 | 18.46  | 30.89  | 5.50E-01 | 48.14  | 31.28 | 1.24E-01 | -1.71  | 19.09 | 9.29E-01 |
| cg19502936 | 15.83  | 7.55  | 3.60E-02 | 31.81  | 19.60 | 1.05E-01 | 4.32   | 22.49  | 8.48E-01 | 13.23  | 9.23  | 1.52E-01 | 25.15  | 28.39 | 3.76E-01 |
| cg20974724 | 18.43  | 8.79  | 3.60E-02 | 34.76  | 10.46 | 8.91E-04 | 19.48  | 14.24  | 1.71E-01 | 23.90  | 11.30 | 3.44E-02 | -1.60  | 8.93  | 8.58E-01 |
| cg24866784 | 19.80  | 9.44  | 3.60E-02 | 30.95  | 19.57 | 1.14E-01 | 18.56  | 19.76  | 3.48E-01 | 14.24  | 14.71 | 3.33E-01 | 19.62  | 26.48 | 4.59E-01 |
| cg13111733 | 36.31  | 17.31 | 3.60E-02 | 43.81  | 21.91 | 4.55E-02 | 9.25   | 110.37 | 9.33E-01 | 19.34  | 81.34 | 8.12E-01 | 25.65  | 31.34 | 4.13E-01 |
| cg16842187 | 4.09   | 1.95  | 3.60E-02 | 4.98   | 3.27  | 1.27E-01 | 3.44   | 4.18   | 4.10E-01 | 5.40   | 3.61  | 1.35E-01 | -0.04  | 5.30  | 9.94E-01 |
| cg10792238 | 16.90  | 8.06  | 3.60E-02 | 36.35  | 22.72 | 1.10E-01 | 19.43  | 24.60  | 4.30E-01 | 9.98   | 9.70  | 3.03E-01 | 43.85  | 29.18 | 1.33E-01 |
| cg07672051 | 10.88  | 5.19  | 3.60E-02 | 7.80   | 7.12  | 2.73E-01 | 18.95  | 11.60  | 1.03E-01 | 21.20  | 18.27 | 2.46E-01 | 6.57   | 11.99 | 5.84E-01 |
| cg00746083 | 31.89  | 15.21 | 3.60E-02 | 33.16  | 18.17 | 6.79E-02 | -63.54 | 77.63  | 4.13E-01 | -16.21 | 80.78 | 8.41E-01 | 51.77  | 32.06 | 1.06E-01 |
| cg00091760 | -8.37  | 3.99  | 3.60E-02 | -9.06  | 6.44  | 1.59E-01 | -3.50  | 10.06  | 7.28E-01 | -9.44  | 10.32 | 3.60E-01 | -9.49  | 7.20  | 1.87E-01 |
| cg08481075 | 7.52   | 3.59  | 3.60E-02 | 7.49   | 6.45  | 2.46E-01 | 12.76  | 8.16   | 1.18E-01 | 8.26   | 6.77  | 2.22E-01 | 1.93   | 7.70  | 8.02E-01 |
| cg00138101 | 13.62  | 6.50  | 3.60E-02 | 14.31  | 9.11  | 1.16E-01 | 2.93   | 20.90  | 8.88E-01 | 26.59  | 13.80 | 5.39E-02 | 0.93   | 15.63 | 9.53E-01 |
| cg26219977 | 15.72  | 7.50  | 3.60E-02 | 14.35  | 18.28 | 4.32E-01 | 35.66  | 42.52  | 4.02E-01 | 15.71  | 8.78  | 7.34E-02 | 10.27  | 28.30 | 7.17E-01 |
| cg17401435 | 18.66  | 8.90  | 3.60E-02 | 14.13  | 17.05 | 4.07E-01 | 7.22   | 17.47  | 6.79E-01 | 23.68  | 15.13 | 1.18E-01 | 38.96  | 25.53 | 1.27E-01 |
| cg16080512 | 33.17  | 15.82 | 3.60E-02 | 35.84  | 17.50 | 4.06E-02 | 18.39  | 73.12  | 8.01E-01 | 140.00 | 70.79 | 4.80E-02 | 4.23   | 32.71 | 8.97E-01 |
| cg12187358 | -18.70 | 8.92  | 3.60E-02 | -28.20 | 15.90 | 7.60E-02 | -12.43 | 18.42  | 5.00E-01 | -3.80  | 15.93 | 8.12E-01 | -41.84 | 24.15 | 8.32E-02 |
| cg06155414 | -14.89 | 7.10  | 3.61E-02 | -10.95 | 15.03 | 4.66E-01 | -5.91  | 25.81  | 8.19E-01 | -14.13 | 9.12  | 1.21E-01 | -36.38 | 23.14 | 1.16E-01 |
| cg08504812 | -7.07  | 3.37  | 3.61E-02 | -7.26  | 5.34  | 1.73E-01 | 1.13   | 8.72   | 8.97E-01 | -8.53  | 6.70  | 2.03E-01 | -11.03 | 7.59  | 1.46E-01 |
| cg07672908 | -5.84  | 2.79  | 3.61E-02 | -7.24  | 4.20  | 8.45E-02 | -4.93  | 5.67   | 3.85E-01 | -1.72  | 7.87  | 8.27E-01 | -6.47  | 6.36  | 3.09E-01 |
| cg21190595 | -11.56 | 5.52  | 3.61E-02 | -17.41 | 8.45  | 3.94E-02 | -2.46  | 12.35  | 8.42E-01 | -5.43  | 15.11 | 7.19E-01 | -12.14 | 11.22 | 2.79E-01 |
| cg23330212 | -8.45  | 4.03  | 3.61E-02 | -16.26 | 8.22  | 4.79E-02 | 0.05   | 11.59  | 9.97E-01 | -6.32  | 5.82  | 2.77E-01 | -9.55  | 10.15 | 3.46E-01 |

|            |        |       |          |        |       |          |        |        |          |        |       |          |        |       |          |
|------------|--------|-------|----------|--------|-------|----------|--------|--------|----------|--------|-------|----------|--------|-------|----------|
| cg03104704 | -35.65 | 17.01 | 3.61E-02 | -48.38 | 21.94 | 2.74E-02 | -40.48 | 53.41  | 4.49E-01 | 13.78  | 45.48 | 7.62E-01 | -27.84 | 42.80 | 5.15E-01 |
| cg03225235 | 21.44  | 10.23 | 3.61E-02 | 20.96  | 18.89 | 2.67E-01 | 26.31  | 21.29  | 2.17E-01 | 11.90  | 17.63 | 5.00E-01 | 37.45  | 27.40 | 1.72E-01 |
| cg26418434 | 9.06   | 4.32  | 3.61E-02 | 8.29   | 4.48  | 6.43E-02 | 7.72   | 7.97   | 3.33E-01 | 28.53  | 10.88 | 8.72E-03 | 1.03   | 7.26  | 8.87E-01 |
| cg02322048 | -38.51 | 18.37 | 3.61E-02 | -37.12 | 23.71 | 1.17E-01 | 4.68   | 67.53  | 9.45E-01 | -59.29 | 49.33 | 2.29E-01 | -44.66 | 42.51 | 2.94E-01 |
| cg25769590 | 5.39   | 2.57  | 3.61E-02 | 1.06   | 2.92  | 7.15E-01 | 5.70   | 4.36   | 1.91E-01 | 7.06   | 7.70  | 3.59E-01 | 11.69  | 4.42  | 8.18E-03 |
| cg20000940 | 46.17  | 22.03 | 3.61E-02 | 44.59  | 29.32 | 1.28E-01 | 50.95  | 117.03 | 6.63E-01 | 59.32  | 49.78 | 2.33E-01 | 37.13  | 48.72 | 4.46E-01 |
| cg06022561 | -5.23  | 2.49  | 3.61E-02 | -5.07  | 3.66  | 1.66E-01 | -5.99  | 5.18   | 2.47E-01 | 0.52   | 8.18  | 9.50E-01 | -7.25  | 5.42  | 1.81E-01 |
| cg21069005 | 10.44  | 4.98  | 3.61E-02 | 9.31   | 7.28  | 2.01E-01 | 13.60  | 11.50  | 2.37E-01 | 24.52  | 13.97 | 7.92E-02 | 1.90   | 10.68 | 8.59E-01 |
| cg07970948 | -16.42 | 7.84  | 3.61E-02 | -25.14 | 12.60 | 4.59E-02 | -21.06 | 18.57  | 2.57E-01 | 3.51   | 18.79 | 8.52E-01 | -13.61 | 15.33 | 3.75E-01 |
| cg24887140 | 27.22  | 12.99 | 3.61E-02 | 16.65  | 16.37 | 3.09E-01 | 40.69  | 74.40  | 5.84E-01 | 85.36  | 60.24 | 1.57E-01 | 39.32  | 23.99 | 1.01E-01 |
| cg12995004 | -8.76  | 4.18  | 3.61E-02 | -9.27  | 10.16 | 3.62E-01 | -11.49 | 17.39  | 5.09E-01 | -8.53  | 5.12  | 9.58E-02 | -7.95  | 12.85 | 5.36E-01 |
| cg20405742 | -9.52  | 4.54  | 3.61E-02 | -13.96 | 9.98  | 1.62E-01 | -5.43  | 13.50  | 6.87E-01 | -5.03  | 6.10  | 4.09E-01 | -25.64 | 12.80 | 4.52E-02 |
| cg09528275 | 17.74  | 8.46  | 3.61E-02 | 19.02  | 13.85 | 1.70E-01 | 5.45   | 23.19  | 8.14E-01 | 48.24  | 30.73 | 1.16E-01 | 14.97  | 13.09 | 2.53E-01 |
| cg21139587 | 12.01  | 5.73  | 3.61E-02 | 17.39  | 7.96  | 2.88E-02 | 12.54  | 14.34  | 3.82E-01 | 17.98  | 17.79 | 3.12E-01 | -4.08  | 12.29 | 7.40E-01 |
| cg06529600 | -6.49  | 3.10  | 3.61E-02 | -11.04 | 4.93  | 2.50E-02 | 0.50   | 6.30   | 9.37E-01 | -9.24  | 6.50  | 1.55E-01 | -1.09  | 8.41  | 8.97E-01 |
| cg19851242 | -20.79 | 9.92  | 3.61E-02 | 28.86  | 36.96 | 4.35E-01 | 122.20 | 152.17 | 4.22E-01 | -25.75 | 10.63 | 1.55E-02 | -18.39 | 43.00 | 6.69E-01 |
| cg23757825 | 14.88  | 7.10  | 3.61E-02 | 8.62   | 15.45 | 5.77E-01 | -14.72 | 24.58  | 5.49E-01 | 22.65  | 9.13  | 1.31E-02 | 5.88   | 22.35 | 7.93E-01 |
| cg10223233 | 8.24   | 3.93  | 3.61E-02 | 5.66   | 5.08  | 2.66E-01 | 20.92  | 13.67  | 1.26E-01 | 7.67   | 9.51  | 4.20E-01 | 12.21  | 10.18 | 2.30E-01 |
| cg19447156 | -29.27 | 13.97 | 3.61E-02 | -90.58 | 49.27 | 6.60E-02 | 53.11  | 200.59 | 7.91E-01 | -25.26 | 15.25 | 9.76E-02 | -13.96 | 50.64 | 7.83E-01 |
| cg22430463 | 12.90  | 6.16  | 3.61E-02 | 8.96   | 8.91  | 3.15E-01 | 16.20  | 12.77  | 2.05E-01 | 31.96  | 14.97 | 3.28E-02 | -4.47  | 17.68 | 8.00E-01 |
| cg13720108 | 15.51  | 7.40  | 3.61E-02 | 18.35  | 9.91  | 6.42E-02 | 18.52  | 21.45  | 3.88E-01 | 17.40  | 26.81 | 5.16E-01 | 7.08   | 14.89 | 6.35E-01 |
| cg01049916 | -19.00 | 9.07  | 3.61E-02 | -19.70 | 12.59 | 1.18E-01 | -4.70  | 26.58  | 8.60E-01 | -43.76 | 24.99 | 8.00E-02 | -10.62 | 18.75 | 5.71E-01 |
| cg10765397 | -14.49 | 6.92  | 3.61E-02 | -20.58 | 12.10 | 8.91E-02 | -10.06 | 16.09  | 5.32E-01 | -10.94 | 18.30 | 5.50E-01 | -12.58 | 11.76 | 2.85E-01 |
| cg00741986 | -8.36  | 3.99  | 3.61E-02 | -10.66 | 5.27  | 4.29E-02 | -11.48 | 8.56   | 1.80E-01 | 4.04   | 17.21 | 8.15E-01 | 0.26   | 10.16 | 9.79E-01 |
| cg05926722 | 9.51   | 4.54  | 3.61E-02 | 12.36  | 6.83  | 7.03E-02 | 7.56   | 11.49  | 5.10E-01 | 16.50  | 10.72 | 1.24E-01 | -0.37  | 9.60  | 9.69E-01 |
| cg21759570 | 7.81   | 3.73  | 3.61E-02 | 7.46   | 5.63  | 1.85E-01 | 16.61  | 9.18   | 7.03E-02 | 10.97  | 10.45 | 2.94E-01 | 1.51   | 7.18  | 8.34E-01 |
| cg09818502 | 22.74  | 10.85 | 3.61E-02 | 10.87  | 29.47 | 7.12E-01 | -35.39 | 100.81 | 7.26E-01 | 23.61  | 12.44 | 5.77E-02 | 40.49  | 35.87 | 2.59E-01 |
| cg07551022 | 19.95  | 9.52  | 3.61E-02 | 32.15  | 21.03 | 1.26E-01 | 11.03  | 51.03  | 8.29E-01 | 17.94  | 11.57 | 1.21E-01 | 10.00  | 33.13 | 7.63E-01 |
| cg05522349 | 29.10  | 13.89 | 3.61E-02 | 47.32  | 20.00 | 1.80E-02 | 3.08   | 33.32  | 9.26E-01 | 13.91  | 7.05  | 4.85E-02 | 76.35  | 33.90 | 2.43E-02 |
| cg09366312 | 14.72  | 7.02  | 3.61E-02 | 20.92  | 13.22 | 1.13E-01 | 22.06  | 24.28  | 3.64E-01 | 14.19  | 12.44 | 2.54E-01 | 7.74   | 12.51 | 5.36E-01 |
| cg19972590 | -14.04 | 6.70  | 3.61E-02 | -13.61 | 16.85 | 4.19E-01 | -28.07 | 28.04  | 3.17E-01 | -15.46 | 8.15  | 5.78E-02 | 1.54   | 20.35 | 9.40E-01 |
| cg25585712 | 13.86  | 6.62  | 3.61E-02 | 17.01  | 10.38 | 1.01E-01 | 14.34  | 17.51  | 4.13E-01 | 26.41  | 14.44 | 6.73E-02 | -2.68  | 13.48 | 8.42E-01 |
| cg23721425 | 14.51  | 6.92  | 3.61E-02 | 9.20   | 14.00 | 5.11E-01 | 3.48   | 18.50  | 8.51E-01 | 21.04  | 10.02 | 3.57E-02 | 12.51  | 18.65 | 5.02E-01 |
| cg15262728 | -42.19 | 20.13 | 3.61E-02 | -37.54 | 28.65 | 1.90E-01 | 92.43  | 114.10 | 4.18E-01 | -58.02 | 36.56 | 1.12E-01 | -52.01 | 48.61 | 2.85E-01 |
| cg07763737 | 11.43  | 5.45  | 3.61E-02 | 19.82  | 12.56 | 1.15E-01 | 26.55  | 25.30  | 2.94E-01 | 9.90   | 6.65  | 1.37E-01 | -2.04  | 17.85 | 9.09E-01 |

|            |        |       |          |        |       |          |         |        |          |        |       |          |        |       |          |
|------------|--------|-------|----------|--------|-------|----------|---------|--------|----------|--------|-------|----------|--------|-------|----------|
| cg10538486 | -8.92  | 4.26  | 3.61E-02 | -11.44 | 11.95 | 3.38E-01 | -22.85  | 21.84  | 2.95E-01 | -6.28  | 4.87  | 1.97E-01 | -25.36 | 15.99 | 1.13E-01 |
| cg02958515 | -7.09  | 3.39  | 3.62E-02 | -5.03  | 6.09  | 4.08E-01 | -5.30   | 6.12   | 3.87E-01 | -10.17 | 6.48  | 1.16E-01 | -10.20 | 10.15 | 3.15E-01 |
| cg00100703 | -14.72 | 7.03  | 3.62E-02 | -6.48  | 17.03 | 7.04E-01 | 24.40   | 35.45  | 4.91E-01 | -20.09 | 8.30  | 1.55E-02 | -2.54  | 25.73 | 9.21E-01 |
| cg15199350 | -14.92 | 7.12  | 3.62E-02 | -40.73 | 17.46 | 1.97E-02 | -8.45   | 30.37  | 7.81E-01 | -8.26  | 7.72  | 2.85E-01 | -24.59 | 23.37 | 2.93E-01 |
| cg11974710 | 36.01  | 17.19 | 3.62E-02 | 27.68  | 21.77 | 2.04E-01 | 94.27   | 84.49  | 2.65E-01 | -31.05 | 94.17 | 7.42E-01 | 52.63  | 31.28 | 9.24E-02 |
| cg26140512 | 8.36   | 3.99  | 3.62E-02 | 6.77   | 7.18  | 3.46E-01 | 8.22    | 6.75   | 2.23E-01 | 2.05   | 10.36 | 8.43E-01 | 15.93  | 9.05  | 7.84E-02 |
| cg26935304 | -10.69 | 5.10  | 3.62E-02 | -12.14 | 10.54 | 2.50E-01 | 19.24   | 17.59  | 2.74E-01 | -12.55 | 5.30  | 1.79E-02 | -19.69 | 14.96 | 1.88E-01 |
| cg17278062 | 13.09  | 6.25  | 3.62E-02 | 21.40  | 8.10  | 8.24E-03 | 14.11   | 12.65  | 2.65E-01 | 16.01  | 17.13 | 3.50E-01 | -6.14  | 12.41 | 6.21E-01 |
| cg21029108 | 12.81  | 6.11  | 3.62E-02 | 10.37  | 9.93  | 2.97E-01 | 17.11   | 14.03  | 2.23E-01 | 8.73   | 10.24 | 3.94E-01 | 33.77  | 22.38 | 1.31E-01 |
| cg16798252 | 13.64  | 6.51  | 3.62E-02 | 12.69  | 11.51 | 2.70E-01 | 17.48   | 15.37  | 2.55E-01 | 13.41  | 13.84 | 3.32E-01 | 12.44  | 12.33 | 3.13E-01 |
| cg00686761 | -21.29 | 10.16 | 3.62E-02 | -9.63  | 24.93 | 6.99E-01 | -111.90 | 112.50 | 3.20E-01 | -27.02 | 11.83 | 2.24E-02 | 13.27  | 34.34 | 6.99E-01 |
| cg14208664 | 14.99  | 7.16  | 3.62E-02 | 29.27  | 19.37 | 1.31E-01 | 10.84   | 21.54  | 6.15E-01 | 9.20   | 8.71  | 2.91E-01 | 46.06  | 25.64 | 7.25E-02 |
| cg20574381 | -11.94 | 5.70  | 3.62E-02 | -15.03 | 16.97 | 3.76E-01 | -5.67   | 30.67  | 8.53E-01 | -10.11 | 6.40  | 1.14E-01 | -34.15 | 23.39 | 1.44E-01 |
| cg23129930 | 6.06   | 2.89  | 3.62E-02 | 6.15   | 3.93  | 1.18E-01 | 9.68    | 6.13   | 1.14E-01 | 1.55   | 11.48 | 8.92E-01 | 2.77   | 6.97  | 6.90E-01 |
| cg04698114 | 15.44  | 7.37  | 3.62E-02 | 54.88  | 25.29 | 3.00E-02 | 25.38   | 33.00  | 4.42E-01 | 9.61   | 8.27  | 2.45E-01 | 18.84  | 19.99 | 3.46E-01 |
| cg08681409 | 9.46   | 4.52  | 3.62E-02 | 10.85  | 7.36  | 1.41E-01 | -0.04   | 8.81   | 9.96E-01 | 18.94  | 13.47 | 1.60E-01 | 13.11  | 9.05  | 1.48E-01 |
| cg08013270 | 19.87  | 9.48  | 3.62E-02 | 44.48  | 14.49 | 2.15E-03 | 11.72   | 26.44  | 6.58E-01 | 10.07  | 12.62 | 4.25E-01 | 8.03   | 16.61 | 6.29E-01 |
| cg22454053 | 10.94  | 5.22  | 3.62E-02 | 8.16   | 8.36  | 3.29E-01 | -5.07   | 10.27  | 6.22E-01 | 16.42  | 5.94  | 5.70E-03 | 23.14  | 12.76 | 6.97E-02 |
| cg20558646 | 16.43  | 7.84  | 3.62E-02 | 18.11  | 15.84 | 2.53E-01 | 5.83    | 33.65  | 8.62E-01 | 16.12  | 10.20 | 1.14E-01 | 19.64  | 23.76 | 4.08E-01 |
| cg13678205 | -12.88 | 6.15  | 3.62E-02 | -9.62  | 9.76  | 3.24E-01 | -9.33   | 12.80  | 4.66E-01 | -12.00 | 14.16 | 3.97E-01 | -25.19 | 14.31 | 7.83E-02 |
| cg01013890 | -30.74 | 14.68 | 3.62E-02 | -24.83 | 18.32 | 1.75E-01 | -47.91  | 41.98  | 2.54E-01 | 5.53   | 62.33 | 9.29E-01 | -51.25 | 34.52 | 1.38E-01 |
| cg00037940 | 16.52  | 7.89  | 3.62E-02 | 49.00  | 23.04 | 3.34E-02 | -4.40   | 45.40  | 9.23E-01 | 13.39  | 8.94  | 1.34E-01 | 6.65   | 28.89 | 8.18E-01 |
| cg07654982 | -10.10 | 4.82  | 3.62E-02 | -4.42  | 6.86  | 5.20E-01 | -8.17   | 9.66   | 3.98E-01 | -19.82 | 18.96 | 2.96E-01 | -23.82 | 10.97 | 2.99E-02 |
| cg01437439 | 15.33  | 7.32  | 3.62E-02 | 12.03  | 13.98 | 3.90E-01 | 28.37   | 15.89  | 7.42E-02 | 11.06  | 11.66 | 3.43E-01 | 13.81  | 21.10 | 5.13E-01 |
| cg07402669 | 12.78  | 6.10  | 3.62E-02 | 25.61  | 11.80 | 3.00E-02 | 3.53    | 16.57  | 8.31E-01 | 14.40  | 10.87 | 1.85E-01 | 3.25   | 11.48 | 7.77E-01 |
| cg23775883 | -6.65  | 3.18  | 3.62E-02 | -7.89  | 4.95  | 1.11E-01 | -5.88   | 6.46   | 3.63E-01 | 6.61   | 9.95  | 5.06E-01 | -10.86 | 6.43  | 9.12E-02 |
| cg04607334 | 17.83  | 8.51  | 3.62E-02 | 37.28  | 22.48 | 9.73E-02 | -4.00   | 41.46  | 9.23E-01 | 13.55  | 9.83  | 1.68E-01 | 38.86  | 33.69 | 2.49E-01 |
| cg15600488 | 12.83  | 6.13  | 3.62E-02 | 16.13  | 10.81 | 1.35E-01 | 20.92   | 19.34  | 2.79E-01 | 18.83  | 11.07 | 8.91E-02 | -0.80  | 11.75 | 9.46E-01 |
| cg22855052 | 14.56  | 6.95  | 3.62E-02 | 16.26  | 13.81 | 2.39E-01 | -27.32  | 35.13  | 4.37E-01 | 18.08  | 9.25  | 5.06E-02 | 9.08   | 18.36 | 6.21E-01 |
| cg00079169 | 16.16  | 7.72  | 3.62E-02 | 5.88   | 18.23 | 7.47E-01 | 39.44   | 19.09  | 3.88E-02 | 9.73   | 9.00  | 2.80E-01 | 42.27  | 27.70 | 1.27E-01 |
| cg09156073 | -9.77  | 4.67  | 3.62E-02 | -6.90  | 7.65  | 3.67E-01 | -11.28  | 12.13  | 3.52E-01 | -9.05  | 9.26  | 3.28E-01 | -14.31 | 9.82  | 1.45E-01 |
| cg03617054 | 6.44   | 3.08  | 3.62E-02 | 3.06   | 4.70  | 5.15E-01 | 13.49   | 6.55   | 3.95E-02 | 11.93  | 8.79  | 1.75E-01 | 3.06   | 6.42  | 6.34E-01 |
| cg04661194 | 13.96  | 6.67  | 3.62E-02 | 28.95  | 17.87 | 1.05E-01 | 23.52   | 26.32  | 3.71E-01 | 12.72  | 7.77  | 1.02E-01 | -15.74 | 27.23 | 5.63E-01 |
| cg06913865 | -6.42  | 3.07  | 3.62E-02 | -9.83  | 5.58  | 7.80E-02 | 3.66    | 6.79   | 5.90E-01 | -9.29  | 5.12  | 6.95E-02 | -6.42  | 8.38  | 4.44E-01 |
| cg04406863 | -9.22  | 4.40  | 3.62E-02 | -6.14  | 6.00  | 3.06E-01 | -16.09  | 11.36  | 1.57E-01 | -19.61 | 11.59 | 9.08E-02 | -4.01  | 10.74 | 7.09E-01 |

|            |        |       |          |        |       |          |         |        |          |        |       |          |        |       |          |
|------------|--------|-------|----------|--------|-------|----------|---------|--------|----------|--------|-------|----------|--------|-------|----------|
| cg16081457 | -5.04  | 2.40  | 3.62E-02 | -6.05  | 3.64  | 9.61E-02 | -5.27   | 5.03   | 2.95E-01 | -2.01  | 6.40  | 7.54E-01 | -4.67  | 5.46  | 3.93E-01 |
| cg14561672 | 31.51  | 15.04 | 3.62E-02 | 40.11  | 31.08 | 1.97E-01 | -53.95  | 81.36  | 5.07E-01 | 27.89  | 19.24 | 1.47E-01 | 57.52  | 43.45 | 1.86E-01 |
| cg04980428 | 10.31  | 4.92  | 3.62E-02 | 17.53  | 7.12  | 1.38E-02 | 10.27   | 13.09  | 4.33E-01 | 2.37   | 10.78 | 8.26E-01 | -0.10  | 11.87 | 9.93E-01 |
| cg19960778 | -19.84 | 9.48  | 3.62E-02 | -46.40 | 13.18 | 4.29E-04 | -9.01   | 16.81  | 5.92E-01 | -10.05 | 12.15 | 4.08E-01 | -11.19 | 14.56 | 4.42E-01 |
| cg08842062 | 22.69  | 10.84 | 3.62E-02 | 36.33  | 21.91 | 9.72E-02 | 51.35   | 25.16  | 4.12E-02 | 7.09   | 9.90  | 4.73E-01 | 32.86  | 29.65 | 2.68E-01 |
| cg18130688 | -8.64  | 4.13  | 3.62E-02 | -9.08  | 8.15  | 2.65E-01 | -29.31  | 15.97  | 6.64E-02 | -7.69  | 5.55  | 1.66E-01 | -0.80  | 11.74 | 9.46E-01 |
| cg06962678 | -27.24 | 13.01 | 3.62E-02 | -23.54 | 18.17 | 1.95E-01 | -105.41 | 56.85  | 6.37E-02 | -30.86 | 27.43 | 2.61E-01 | -12.93 | 28.35 | 6.48E-01 |
| cg11520366 | 19.95  | 9.53  | 3.63E-02 | 24.66  | 26.11 | 3.45E-01 | 88.85   | 133.55 | 5.06E-01 | 18.20  | 10.56 | 8.48E-02 | 29.34  | 43.65 | 5.01E-01 |
| cg16786703 | 27.28  | 13.03 | 3.63E-02 | 43.95  | 22.19 | 4.76E-02 | -0.32   | 35.25  | 9.93E-01 | 7.87   | 36.20 | 8.28E-01 | 28.67  | 20.89 | 1.70E-01 |
| cg10499926 | -32.96 | 15.74 | 3.63E-02 | -42.06 | 17.86 | 1.85E-02 | 43.73   | 91.10  | 6.31E-01 | 16.69  | 70.56 | 8.13E-01 | -16.89 | 41.56 | 6.84E-01 |
| cg10307632 | -8.98  | 4.29  | 3.63E-02 | -7.88  | 9.50  | 4.07E-01 | -16.63  | 20.98  | 4.28E-01 | -6.64  | 5.45  | 2.23E-01 | -18.83 | 11.59 | 1.04E-01 |
| cg05781996 | 8.44   | 4.03  | 3.63E-02 | 6.72   | 5.46  | 2.19E-01 | 17.41   | 9.33   | 6.21E-02 | 4.57   | 15.57 | 7.69E-01 | 6.07   | 8.97  | 4.99E-01 |
| cg02846329 | 15.63  | 7.46  | 3.63E-02 | 3.77   | 18.20 | 8.36E-01 | 60.68   | 48.14  | 2.08E-01 | 17.03  | 8.82  | 5.34E-02 | 14.58  | 24.72 | 5.55E-01 |
| cg22488719 | -8.67  | 4.14  | 3.63E-02 | -19.02 | 9.49  | 4.51E-02 | -9.10   | 12.50  | 4.66E-01 | -2.64  | 5.65  | 6.40E-01 | -16.16 | 10.27 | 1.16E-01 |
| cg20739510 | 13.65  | 6.52  | 3.63E-02 | 15.80  | 7.55  | 3.64E-02 | -6.04   | 22.59  | 7.89E-01 | 46.34  | 32.81 | 1.58E-01 | 4.19   | 17.87 | 8.14E-01 |
| cg18196374 | -11.39 | 5.44  | 3.63E-02 | -10.38 | 12.11 | 3.91E-01 | -2.81   | 18.63  | 8.80E-01 | -12.39 | 7.23  | 8.66E-02 | -13.94 | 14.22 | 3.27E-01 |
| cg00960395 | 19.20  | 9.17  | 3.63E-02 | 22.13  | 15.42 | 1.51E-01 | 26.88   | 27.92  | 3.36E-01 | 18.49  | 23.31 | 4.27E-01 | 14.62  | 14.79 | 3.23E-01 |
| cg07312514 | 18.59  | 8.88  | 3.63E-02 | 47.57  | 46.93 | 3.11E-01 | 37.65   | 203.31 | 8.53E-01 | 17.30  | 9.44  | 6.68E-02 | 19.47  | 31.89 | 5.41E-01 |
| cg07829740 | -12.18 | 5.82  | 3.63E-02 | -25.98 | 12.64 | 3.98E-02 | -20.33  | 21.18  | 3.37E-01 | -5.06  | 6.60  | 4.43E-01 | -29.35 | 21.33 | 1.69E-01 |
| cg22745437 | 42.79  | 20.44 | 3.63E-02 | 37.28  | 44.21 | 3.99E-01 | -344.03 | 234.45 | 1.42E-01 | 43.10  | 23.64 | 6.83E-02 | 78.26  | 61.37 | 2.02E-01 |
| cg01615704 | 10.87  | 5.19  | 3.63E-02 | 19.57  | 9.91  | 4.84E-02 | 18.55   | 14.22  | 1.92E-01 | 9.74   | 11.05 | 3.78E-01 | 2.37   | 8.53  | 7.81E-01 |
| cg17526770 | 18.90  | 9.03  | 3.63E-02 | 37.47  | 16.67 | 2.46E-02 | 11.92   | 15.89  | 4.53E-01 | 20.46  | 18.23 | 2.62E-01 | -6.85  | 24.22 | 7.77E-01 |
| cg16569014 | 31.66  | 15.12 | 3.63E-02 | 30.73  | 17.24 | 7.47E-02 | -24.14  | 91.81  | 7.93E-01 | 73.99  | 72.74 | 3.09E-01 | 34.17  | 37.75 | 3.65E-01 |
| cg09294084 | 7.04   | 3.36  | 3.63E-02 | 7.65   | 5.07  | 1.31E-01 | 11.35   | 6.66   | 8.81E-02 | 7.42   | 8.90  | 4.04E-01 | -1.76  | 8.35  | 8.34E-01 |
| cg01708648 | 17.75  | 8.48  | 3.63E-02 | 20.41  | 18.01 | 2.57E-01 | 25.07   | 18.68  | 1.80E-01 | 15.87  | 12.53 | 2.05E-01 | 6.96   | 25.09 | 7.82E-01 |
| cg23191956 | 16.69  | 7.97  | 3.63E-02 | 11.98  | 18.36 | 5.14E-01 | 14.16   | 26.91  | 5.99E-01 | 14.50  | 11.18 | 1.95E-01 | 26.98  | 17.16 | 1.16E-01 |
| cg03808158 | -32.60 | 15.57 | 3.63E-02 | -40.64 | 20.11 | 4.33E-02 | -38.50  | 78.71  | 6.25E-01 | -88.38 | 70.66 | 2.11E-01 | -7.81  | 27.83 | 7.79E-01 |
| cg00830492 | -16.41 | 7.84  | 3.63E-02 | -49.72 | 20.84 | 1.71E-02 | -7.94   | 35.34  | 8.22E-01 | -10.66 | 8.64  | 2.17E-01 | -17.47 | 30.17 | 5.63E-01 |
| cg06618968 | 27.01  | 12.90 | 3.63E-02 | 24.26  | 15.72 | 1.23E-01 | 43.43   | 46.20  | 3.47E-01 | 71.96  | 63.46 | 2.57E-01 | 20.82  | 28.35 | 4.63E-01 |
| cg19375539 | -7.47  | 3.57  | 3.63E-02 | -13.10 | 9.10  | 1.50E-01 | -0.92   | 15.89  | 9.54E-01 | -5.28  | 4.29  | 2.18E-01 | -16.82 | 11.03 | 1.27E-01 |
| cg15768265 | 9.69   | 4.63  | 3.63E-02 | 12.34  | 6.82  | 7.02E-02 | 7.35    | 10.07  | 4.65E-01 | 21.94  | 18.83 | 2.44E-01 | 4.19   | 8.96  | 6.40E-01 |
| cg09233730 | 20.71  | 9.89  | 3.63E-02 | 29.38  | 19.03 | 1.23E-01 | 11.44   | 17.84  | 5.21E-01 | 14.63  | 19.13 | 4.44E-01 | 34.53  | 25.16 | 1.70E-01 |
| cg14543285 | 5.09   | 2.43  | 3.63E-02 | 3.73   | 3.12  | 2.31E-01 | 12.13   | 6.26   | 5.26E-02 | 6.48   | 7.10  | 3.62E-01 | 1.85   | 6.90  | 7.89E-01 |
| cg13242199 | -10.55 | 5.04  | 3.63E-02 | -6.23  | 7.63  | 4.14E-01 | -22.62  | 14.42  | 1.17E-01 | -0.25  | 12.31 | 9.84E-01 | -18.36 | 9.63  | 5.66E-02 |
| cg00753442 | -8.37  | 4.00  | 3.63E-02 | -16.09 | 9.69  | 9.69E-02 | -7.67   | 18.17  | 6.73E-01 | -6.79  | 4.81  | 1.58E-01 | -6.31  | 13.22 | 6.33E-01 |

|            |        |       |          |        |       |          |         |        |          |        |       |          |        |       |          |
|------------|--------|-------|----------|--------|-------|----------|---------|--------|----------|--------|-------|----------|--------|-------|----------|
| cg23306526 | 25.78  | 12.31 | 3.63E-02 | 39.08  | 19.37 | 4.36E-02 | 1.39    | 39.23  | 9.72E-01 | 40.41  | 26.16 | 1.22E-01 | 3.22   | 23.46 | 8.91E-01 |
| cg08307963 | 27.64  | 13.21 | 3.63E-02 | 19.34  | 18.78 | 3.03E-01 | 36.86   | 36.06  | 3.07E-01 | 30.98  | 34.24 | 3.66E-01 | 38.29  | 27.97 | 1.71E-01 |
| cg08089031 | 24.30  | 11.61 | 3.63E-02 | 29.99  | 19.64 | 1.27E-01 | -8.58   | 48.52  | 8.60E-01 | 24.16  | 17.42 | 1.66E-01 | 24.01  | 30.04 | 4.24E-01 |
| cg06516650 | 41.82  | 19.98 | 3.63E-02 | 35.83  | 23.40 | 1.26E-01 | -27.20  | 112.48 | 8.09E-01 | -2.53  | 64.14 | 9.69E-01 | 118.04 | 52.96 | 2.58E-02 |
| cg14105952 | -38.05 | 18.18 | 3.63E-02 | -49.52 | 22.45 | 2.74E-02 | -80.68  | 88.09  | 3.60E-01 | 29.26  | 70.44 | 6.78E-01 | -17.40 | 37.50 | 6.43E-01 |
| cg03366884 | -8.81  | 4.21  | 3.63E-02 | -4.99  | 5.35  | 3.51E-01 | -14.91  | 11.56  | 1.97E-01 | -19.53 | 12.88 | 1.29E-01 | -11.78 | 11.23 | 2.94E-01 |
| cg27203560 | 12.02  | 5.74  | 3.63E-02 | 15.06  | 6.54  | 2.13E-02 | 28.84   | 13.81  | 3.67E-02 | 12.44  | 11.81 | 2.92E-01 | -3.14  | 9.78  | 7.48E-01 |
| cg22942950 | 37.95  | 18.13 | 3.63E-02 | 25.50  | 24.36 | 2.95E-01 | 150.22  | 84.92  | 7.69E-02 | -9.19  | 56.79 | 8.71E-01 | 56.73  | 31.06 | 6.78E-02 |
| cg13060154 | -33.77 | 16.13 | 3.63E-02 | -24.43 | 22.67 | 2.81E-01 | -41.60  | 50.65  | 4.11E-01 | -0.86  | 45.29 | 9.85E-01 | -64.32 | 31.32 | 4.00E-02 |
| cg12540260 | 21.24  | 10.15 | 3.63E-02 | 50.54  | 26.13 | 5.31E-02 | -114.01 | 134.37 | 3.96E-01 | 17.15  | 11.51 | 1.36E-01 | 14.17  | 39.49 | 7.20E-01 |
| cg04416111 | -9.67  | 4.62  | 3.63E-02 | -9.30  | 9.41  | 3.23E-01 | -3.26   | 11.74  | 7.82E-01 | -11.86 | 6.88  | 8.48E-02 | -10.26 | 11.76 | 3.83E-01 |
| cg10526277 | 13.95  | 6.66  | 3.63E-02 | 23.65  | 10.29 | 2.16E-02 | 3.98    | 19.04  | 8.34E-01 | 17.46  | 21.48 | 4.16E-01 | 5.16   | 11.07 | 6.41E-01 |
| cg07023704 | 20.20  | 9.65  | 3.63E-02 | 16.72  | 13.93 | 2.30E-01 | 22.54   | 27.19  | 4.07E-01 | 48.22  | 29.53 | 1.03E-01 | 14.56  | 17.99 | 4.18E-01 |
| cg19581696 | -27.57 | 13.17 | 3.63E-02 | -47.50 | 31.65 | 1.33E-01 | -191.04 | 167.38 | 2.54E-01 | -26.39 | 15.27 | 8.39E-02 | 19.33  | 47.61 | 6.85E-01 |
| cg07645004 | 21.15  | 10.10 | 3.63E-02 | 24.14  | 17.29 | 1.63E-01 | 25.51   | 19.27  | 1.86E-01 | 2.27   | 21.50 | 9.16E-01 | 33.10  | 25.04 | 1.86E-01 |
| cg24122364 | 16.26  | 7.77  | 3.63E-02 | -2.08  | 19.12 | 9.13E-01 | 24.69   | 25.20  | 3.27E-01 | 17.38  | 9.47  | 6.65E-02 | 38.39  | 30.10 | 2.02E-01 |
| cg00281152 | 31.72  | 15.16 | 3.64E-02 | 17.49  | 29.73 | 5.56E-01 | 16.11   | 131.47 | 9.02E-01 | 38.94  | 19.06 | 4.11E-02 | 24.77  | 49.33 | 6.16E-01 |
| cg00742738 | 13.63  | 6.51  | 3.64E-02 | -8.78  | 19.43 | 6.51E-01 | 31.28   | 19.79  | 1.14E-01 | 12.50  | 7.66  | 1.03E-01 | 38.23  | 27.10 | 1.58E-01 |
| cg06335773 | 52.43  | 25.05 | 3.64E-02 | 79.70  | 29.91 | 7.72E-03 | 33.76   | 99.60  | 7.35E-01 | 59.82  | 74.84 | 4.24E-01 | -28.73 | 54.32 | 5.97E-01 |
| cg16943185 | -12.93 | 6.18  | 3.64E-02 | -21.70 | 10.51 | 3.90E-02 | -6.48   | 14.22  | 6.49E-01 | -14.83 | 12.52 | 2.36E-01 | -2.67  | 13.13 | 8.39E-01 |
| cg07405182 | -4.65  | 2.22  | 3.64E-02 | -4.39  | 3.71  | 2.36E-01 | -8.54   | 5.38   | 1.12E-01 | -3.49  | 3.98  | 3.81E-01 | -3.33  | 5.55  | 5.49E-01 |
| cg14301348 | -7.45  | 3.56  | 3.64E-02 | -10.72 | 4.93  | 2.98E-02 | -5.06   | 9.55   | 5.96E-01 | 2.30   | 9.08  | 8.00E-01 | -8.16  | 8.26  | 3.23E-01 |
| cg24385940 | -8.60  | 4.11  | 3.64E-02 | -18.78 | 7.88  | 1.71E-02 | -5.70   | 9.52   | 5.49E-01 | -5.66  | 6.36  | 3.73E-01 | -0.51  | 11.66 | 9.65E-01 |
| cg20401101 | 13.03  | 6.23  | 3.64E-02 | 19.21  | 12.90 | 1.36E-01 | 1.58    | 13.93  | 9.10E-01 | 19.76  | 9.50  | 3.75E-02 | -1.85  | 16.82 | 9.13E-01 |
| cg14520511 | 34.37  | 16.42 | 3.64E-02 | 27.34  | 19.94 | 1.70E-01 | 129.44  | 76.64  | 9.12E-02 | 86.50  | 91.34 | 3.44E-01 | 29.10  | 33.26 | 3.82E-01 |
| cg16108230 | 11.34  | 5.42  | 3.64E-02 | 20.40  | 7.23  | 4.79E-03 | 8.17    | 10.58  | 4.40E-01 | 15.69  | 11.83 | 1.85E-01 | -2.60  | 9.58  | 7.86E-01 |
| cg06754606 | 17.00  | 8.12  | 3.64E-02 | 23.85  | 12.77 | 6.17E-02 | 8.48    | 15.28  | 5.79E-01 | 3.65   | 22.54 | 8.71E-01 | 24.45  | 18.99 | 1.98E-01 |
| cg04552451 | 24.26  | 11.60 | 3.64E-02 | 59.50  | 17.96 | 9.23E-04 | 28.39   | 34.68  | 4.13E-01 | 14.66  | 7.56  | 5.24E-02 | 6.44   | 16.78 | 7.01E-01 |
| cg19119032 | 12.86  | 6.15  | 3.64E-02 | 23.24  | 10.25 | 2.33E-02 | 6.40    | 15.76  | 6.85E-01 | 20.12  | 10.81 | 6.26E-02 | -1.25  | 10.31 | 9.03E-01 |
| cg00469771 | 11.27  | 5.39  | 3.64E-02 | 10.00  | 7.14  | 1.61E-01 | 9.45    | 12.33  | 4.43E-01 | 27.91  | 20.03 | 1.63E-01 | 10.51  | 13.22 | 4.26E-01 |
| cg18412834 | 22.86  | 10.93 | 3.64E-02 | 73.45  | 48.26 | 1.28E-01 | -7.04   | 99.89  | 9.44E-01 | 20.19  | 11.80 | 8.71E-02 | 23.49  | 38.65 | 5.43E-01 |
| cg24737761 | 4.83   | 2.31  | 3.64E-02 | 4.43   | 3.05  | 1.47E-01 | 10.54   | 6.02   | 7.99E-02 | 2.97   | 5.67  | 6.00E-01 | 2.22   | 6.78  | 7.43E-01 |
| cg24548817 | 5.20   | 2.48  | 3.64E-02 | 3.74   | 3.05  | 2.20E-01 | 9.82    | 6.03   | 1.04E-01 | 6.93   | 8.62  | 4.21E-01 | 5.66   | 8.58  | 5.09E-01 |
| cg11380748 | -10.73 | 5.13  | 3.64E-02 | -9.28  | 15.42 | 5.47E-01 | 3.38    | 22.73  | 8.82E-01 | -13.19 | 5.80  | 2.30E-02 | 7.64   | 21.56 | 7.23E-01 |
| cg16036142 | 34.98  | 16.72 | 3.64E-02 | 22.42  | 14.47 | 1.21E-01 | 105.69  | 41.58  | 1.10E-02 | 76.25  | 41.27 | 6.47E-02 | 10.35  | 14.91 | 4.88E-01 |

|               |        |       |          |        |       |          |         |        |          |        |       |          |        |       |          |
|---------------|--------|-------|----------|--------|-------|----------|---------|--------|----------|--------|-------|----------|--------|-------|----------|
| cg02940562    | 11.14  | 5.32  | 3.64E-02 | 2.83   | 7.82  | 7.18E-01 | 15.97   | 9.43   | 9.01E-02 | 2.11   | 16.45 | 8.98E-01 | 25.37  | 11.46 | 2.69E-02 |
| cg26186331    | -11.36 | 5.43  | 3.64E-02 | -18.66 | 8.09  | 2.11E-02 | -1.91   | 9.36   | 8.38E-01 | -4.01  | 6.70  | 5.49E-01 | -26.35 | 11.24 | 1.91E-02 |
| cg10961753    | 14.19  | 6.78  | 3.64E-02 | 38.24  | 17.43 | 2.83E-02 | 16.48   | 26.20  | 5.29E-01 | 11.17  | 8.44  | 1.85E-01 | 0.56   | 18.44 | 9.76E-01 |
| cg01455456    | -9.93  | 4.75  | 3.64E-02 | -8.77  | 10.51 | 4.04E-01 | -9.29   | 20.08  | 6.44E-01 | -9.30  | 5.90  | 1.15E-01 | -17.42 | 15.67 | 2.66E-01 |
| cg11287647    | 6.02   | 2.88  | 3.64E-02 | 10.31  | 4.23  | 1.48E-02 | 6.30    | 5.74   | 2.72E-01 | -4.23  | 8.17  | 6.04E-01 | 1.52   | 6.99  | 8.28E-01 |
| cg13483882    | 13.32  | 6.37  | 3.65E-02 | 24.03  | 7.86  | 2.24E-03 | -6.34   | 13.66  | 6.43E-01 | 14.62  | 12.98 | 2.60E-01 | 9.27   | 11.37 | 4.15E-01 |
| cg25722198    | 29.59  | 14.14 | 3.65E-02 | 44.13  | 41.23 | 2.84E-01 | -138.71 | 134.65 | 3.03E-01 | 26.05  | 15.92 | 1.02E-01 | 65.10  | 49.23 | 1.86E-01 |
| cg17719099    | 21.52  | 10.29 | 3.65E-02 | 11.91  | 20.96 | 5.70E-01 | 1.93    | 44.74  | 9.66E-01 | 27.95  | 13.10 | 3.29E-02 | 14.68  | 34.31 | 6.69E-01 |
| cg14472291    | -8.84  | 4.23  | 3.65E-02 | -16.62 | 9.47  | 7.92E-02 | -8.47   | 11.65  | 4.67E-01 | -6.06  | 5.92  | 3.06E-01 | -8.35  | 10.64 | 4.33E-01 |
| cg15025383    | -34.26 | 16.38 | 3.65E-02 | -11.91 | 31.03 | 7.01E-01 | -107.57 | 131.98 | 4.15E-01 | -37.05 | 21.70 | 8.77E-02 | -60.01 | 44.38 | 1.76E-01 |
| cg26716103    | 12.64  | 6.04  | 3.65E-02 | 15.03  | 14.01 | 2.84E-01 | 50.19   | 30.11  | 9.55E-02 | 9.97   | 7.07  | 1.58E-01 | 12.35  | 28.86 | 6.69E-01 |
| cg20731384    | -11.47 | 5.48  | 3.65E-02 | -15.30 | 7.98  | 5.53E-02 | -4.42   | 11.37  | 6.97E-01 | 3.28   | 18.93 | 8.62E-01 | -16.50 | 11.90 | 1.66E-01 |
| cg03954045    | -8.53  | 4.08  | 3.65E-02 | -11.67 | 7.06  | 9.86E-02 | -6.61   | 12.28  | 5.91E-01 | -7.55  | 6.36  | 2.35E-01 | -5.56  | 10.68 | 6.02E-01 |
| cg02769781    | 8.96   | 4.28  | 3.65E-02 | 14.04  | 7.36  | 5.64E-02 | 12.82   | 8.40   | 1.27E-01 | 10.05  | 9.42  | 2.86E-01 | -5.51  | 9.49  | 5.62E-01 |
| cg26227310    | -7.71  | 3.68  | 3.65E-02 | -2.59  | 6.56  | 6.93E-01 | 5.60    | 13.26  | 6.73E-01 | -13.49 | 5.18  | 9.25E-03 | -4.94  | 11.55 | 6.69E-01 |
| cg02027780    | 18.93  | 9.05  | 3.65E-02 | 4.05   | 19.60 | 8.36E-01 | 50.75   | 31.30  | 1.05E-01 | 23.51  | 11.74 | 4.53E-02 | -1.29  | 27.42 | 9.62E-01 |
| cg25200453    | -11.71 | 5.60  | 3.65E-02 | -16.08 | 11.11 | 1.48E-01 | 0.09    | 12.66  | 9.95E-01 | -9.90  | 8.95  | 2.69E-01 | -23.59 | 14.00 | 9.19E-02 |
| cg11032474    | -32.62 | 15.60 | 3.65E-02 | -41.17 | 20.01 | 3.97E-02 | -82.74  | 47.94  | 8.43E-02 | -2.81  | 49.46 | 9.55E-01 | 7.60   | 36.03 | 8.33E-01 |
| cg26942829    | 4.91   | 2.35  | 3.65E-02 | 4.99   | 3.13  | 1.11E-01 | 9.62    | 5.40   | 7.46E-02 | 3.34   | 6.51  | 6.08E-01 | -1.16  | 6.74  | 8.63E-01 |
| cg19350679    | -4.97  | 2.38  | 3.65E-02 | -6.62  | 4.30  | 1.24E-01 | -0.39   | 5.57   | 9.44E-01 | -5.85  | 3.85  | 1.28E-01 | -4.95  | 6.57  | 4.51E-01 |
| cg25162117    | -15.70 | 7.51  | 3.65E-02 | -35.23 | 13.11 | 7.18E-03 | -21.35  | 24.90  | 3.91E-01 | -6.24  | 7.06  | 3.77E-01 | -13.62 | 18.25 | 4.55E-01 |
| cg20981058    | 36.08  | 17.25 | 3.65E-02 | 50.68  | 42.32 | 2.31E-01 | 86.99   | 204.48 | 6.71E-01 | 25.04  | 19.97 | 2.10E-01 | 103.65 | 60.74 | 8.79E-02 |
| cg21605566    | 29.30  | 14.01 | 3.65E-02 | 29.70  | 17.46 | 8.89E-02 | 2.22    | 83.90  | 9.79E-01 | 45.71  | 82.07 | 5.78E-01 | 29.34  | 25.60 | 2.52E-01 |
| cg05817054    | 19.16  | 9.16  | 3.65E-02 | 19.78  | 17.16 | 2.49E-01 | 14.18   | 17.11  | 4.08E-01 | 16.61  | 18.45 | 3.68E-01 | 29.49  | 21.49 | 1.70E-01 |
| cg25247596    | 14.49  | 6.93  | 3.65E-02 | 5.02   | 19.37 | 7.95E-01 | 0.03    | 25.09  | 9.99E-01 | 17.59  | 8.05  | 2.88E-02 | 14.73  | 29.79 | 6.21E-01 |
| cg14861570    | -12.30 | 5.88  | 3.65E-02 | -22.79 | 8.63  | 8.25E-03 | 2.20    | 13.46  | 8.70E-01 | -4.52  | 18.84 | 8.11E-01 | -7.05  | 11.70 | 5.47E-01 |
| cg04658021    | 6.28   | 3.00  | 3.65E-02 | 7.17   | 3.69  | 5.18E-02 | 11.30   | 7.10   | 1.11E-01 | 1.80   | 13.21 | 8.92E-01 | -5.45  | 9.16  | 5.52E-01 |
| cg09899220    | 8.23   | 3.94  | 3.65E-02 | 7.51   | 5.04  | 1.37E-01 | 18.74   | 9.97   | 6.01E-02 | 7.01   | 14.20 | 6.22E-01 | 1.25   | 9.90  | 8.99E-01 |
| ch.15.811911R | -26.10 | 12.48 | 3.65E-02 | -20.42 | 16.09 | 2.04E-01 | -70.62  | 46.62  | 1.30E-01 | -38.08 | 55.48 | 4.92E-01 | -24.74 | 23.79 | 2.98E-01 |
| cg02791338    | -28.59 | 13.67 | 3.65E-02 | -37.40 | 18.86 | 4.74E-02 | -83.16  | 76.23  | 2.75E-01 | -27.83 | 30.74 | 3.65E-01 | -3.07  | 27.66 | 9.12E-01 |
| cg02973680    | 20.81  | 9.95  | 3.65E-02 | 34.83  | 21.06 | 9.82E-02 | 48.18   | 45.75  | 2.92E-01 | 14.58  | 12.81 | 2.55E-01 | 15.52  | 28.09 | 5.81E-01 |
| cg26228591    | 19.73  | 9.43  | 3.65E-02 | 23.25  | 18.49 | 2.09E-01 | 21.21   | 16.44  | 1.97E-01 | 8.11   | 18.82 | 6.67E-01 | 29.24  | 23.65 | 2.16E-01 |
| cg19082496    | 4.74   | 2.27  | 3.65E-02 | 5.15   | 3.33  | 1.22E-01 | 6.53    | 5.32   | 2.19E-01 | 3.49   | 4.43  | 4.30E-01 | 2.68   | 7.44  | 7.19E-01 |
| cg21117373    | -27.17 | 12.99 | 3.65E-02 | -43.57 | 40.31 | 2.80E-01 | -121.97 | 177.94 | 4.93E-01 | -24.17 | 14.45 | 9.44E-02 | -29.80 | 45.37 | 5.11E-01 |
| cg25156443    | 18.50  | 8.85  | 3.65E-02 | 17.40  | 14.86 | 2.42E-01 | 92.22   | 53.84  | 8.67E-02 | 9.43   | 8.13  | 2.46E-01 | 37.58  | 19.49 | 5.38E-02 |

|            |        |       |          |        |       |          |        |        |          |        |       |          |        |       |          |
|------------|--------|-------|----------|--------|-------|----------|--------|--------|----------|--------|-------|----------|--------|-------|----------|
| cg16779811 | -10.41 | 4.98  | 3.65E-02 | -16.46 | 7.01  | 1.89E-02 | -1.76  | 11.35  | 8.77E-01 | -17.72 | 17.35 | 3.07E-01 | -1.44  | 10.58 | 8.92E-01 |
| cg01015395 | -6.65  | 3.18  | 3.65E-02 | -13.07 | 7.30  | 7.35E-02 | -12.83 | 10.01  | 2.00E-01 | -3.41  | 4.11  | 4.07E-01 | -7.50  | 9.53  | 4.31E-01 |
| cg09313140 | -8.29  | 3.96  | 3.65E-02 | -10.09 | 7.20  | 1.61E-01 | -5.73  | 10.22  | 5.75E-01 | -8.45  | 6.45  | 1.90E-01 | -6.96  | 9.62  | 4.70E-01 |
| cg15275313 | 9.63   | 4.60  | 3.65E-02 | 4.72   | 6.32  | 4.55E-01 | 17.93  | 10.32  | 8.24E-02 | 6.86   | 18.27 | 7.07E-01 | 15.05  | 10.11 | 1.37E-01 |
| cg13296238 | 12.84  | 6.14  | 3.66E-02 | 17.88  | 8.51  | 3.56E-02 | 6.57   | 14.65  | 6.54E-01 | 11.60  | 17.16 | 4.99E-01 | 5.04   | 14.70 | 7.32E-01 |
| cg03767333 | 12.23  | 5.85  | 3.66E-02 | 4.52   | 11.98 | 7.06E-01 | 21.87  | 18.10  | 2.27E-01 | 15.77  | 7.78  | 4.26E-02 | -0.51  | 19.27 | 9.79E-01 |
| cg05225883 | 6.40   | 3.06  | 3.66E-02 | 7.47   | 4.41  | 8.97E-02 | 9.03   | 7.98   | 2.58E-01 | -0.85  | 7.85  | 9.14E-01 | 7.33   | 6.58  | 2.65E-01 |
| cg19453154 | 22.08  | 10.56 | 3.66E-02 | 10.36  | 11.93 | 3.85E-01 | 40.45  | 16.71  | 1.55E-02 | 50.22  | 23.48 | 3.24E-02 | 2.36   | 17.18 | 8.91E-01 |
| cg17182808 | 13.85  | 6.63  | 3.66E-02 | 16.79  | 17.09 | 3.26E-01 | 24.68  | 29.51  | 4.03E-01 | 9.71   | 7.70  | 2.07E-01 | 48.78  | 27.18 | 7.27E-02 |
| cg02126477 | -13.57 | 6.49  | 3.66E-02 | -1.73  | 20.81 | 9.34E-01 | -4.50  | 36.92  | 9.03E-01 | -15.46 | 7.16  | 3.10E-02 | -11.29 | 28.75 | 6.95E-01 |
| cg17813225 | -9.28  | 4.44  | 3.66E-02 | -16.00 | 10.99 | 1.45E-01 | 9.78   | 21.92  | 6.55E-01 | -7.37  | 5.32  | 1.65E-01 | -19.54 | 14.13 | 1.67E-01 |
| cg05040219 | 14.89  | 7.12  | 3.66E-02 | 36.53  | 15.18 | 1.61E-02 | -1.52  | 30.34  | 9.60E-01 | 7.82   | 8.71  | 3.70E-01 | 20.96  | 21.65 | 3.33E-01 |
| cg08401990 | -28.42 | 13.60 | 3.66E-02 | -8.64  | 53.36 | 8.71E-01 | -17.23 | 210.01 | 9.35E-01 | -31.47 | 14.84 | 3.40E-02 | -15.04 | 44.88 | 7.38E-01 |
| cg07179033 | 6.32   | 3.02  | 3.66E-02 | 4.35   | 4.05  | 2.83E-01 | 15.89  | 7.15   | 2.62E-02 | 7.81   | 8.33  | 3.49E-01 | 0.22   | 8.30  | 9.79E-01 |
| cg17393917 | 14.12  | 6.75  | 3.66E-02 | 23.26  | 10.13 | 2.17E-02 | -10.82 | 18.20  | 5.52E-01 | 24.66  | 17.63 | 1.62E-01 | 9.09   | 10.83 | 4.01E-01 |
| cg13654525 | 7.35   | 3.52  | 3.66E-02 | 5.74   | 4.88  | 2.39E-01 | 4.92   | 7.91   | 5.34E-01 | 21.07  | 14.77 | 1.54E-01 | 9.71   | 7.38  | 1.89E-01 |
| cg04940764 | -7.14  | 3.41  | 3.66E-02 | -6.42  | 5.26  | 2.22E-01 | -6.87  | 7.23   | 3.42E-01 | -9.71  | 10.92 | 3.74E-01 | -7.56  | 6.72  | 2.61E-01 |
| cg05453631 | 14.57  | 6.97  | 3.66E-02 | 11.69  | 9.46  | 2.16E-01 | 12.73  | 19.42  | 5.12E-01 | 18.54  | 14.20 | 1.92E-01 | 24.25  | 23.60 | 3.04E-01 |
| cg25432792 | -7.01  | 3.35  | 3.66E-02 | -10.81 | 6.18  | 8.04E-02 | 3.01   | 12.33  | 8.07E-01 | -5.46  | 4.76  | 2.52E-01 | -9.84  | 9.04  | 2.77E-01 |
| cg25830696 | 19.16  | 9.16  | 3.66E-02 | -5.60  | 34.69 | 8.72E-01 | 17.06  | 168.02 | 9.19E-01 | 22.38  | 9.72  | 2.13E-02 | -10.81 | 47.14 | 8.19E-01 |
| cg07251193 | 24.00  | 11.48 | 3.66E-02 | 8.87   | 29.71 | 7.65E-01 | 42.72  | 60.73  | 4.82E-01 | 18.75  | 13.60 | 1.68E-01 | 75.83  | 35.80 | 3.42E-02 |
| cg05219493 | 7.04   | 3.37  | 3.66E-02 | 2.43   | 4.85  | 6.16E-01 | 10.13  | 7.61   | 1.83E-01 | 12.39  | 8.62  | 1.51E-01 | 11.71  | 8.16  | 1.52E-01 |
| cg22112267 | 19.39  | 9.27  | 3.66E-02 | 31.45  | 13.82 | 2.29E-02 | 18.91  | 26.98  | 4.83E-01 | 26.90  | 23.01 | 2.42E-01 | -5.12  | 17.88 | 7.75E-01 |
| cg18207699 | 19.86  | 9.50  | 3.66E-02 | 17.47  | 16.74 | 2.97E-01 | 19.76  | 17.25  | 2.52E-01 | 4.38   | 21.62 | 8.40E-01 | 40.74  | 22.31 | 6.78E-02 |
| cg09540612 | 5.59   | 2.67  | 3.66E-02 | 5.22   | 3.28  | 1.11E-01 | 11.36  | 6.44   | 7.76E-02 | -0.70  | 11.45 | 9.51E-01 | 1.79   | 8.19  | 8.27E-01 |
| cg07243700 | 26.79  | 12.82 | 3.66E-02 | 30.72  | 14.82 | 3.81E-02 | 16.59  | 88.73  | 8.52E-01 | 23.29  | 64.37 | 7.17E-01 | 13.25  | 29.34 | 6.51E-01 |
| cg02770745 | 4.20   | 2.01  | 3.66E-02 | 4.40   | 2.78  | 1.13E-01 | 7.14   | 4.66   | 1.25E-01 | 0.82   | 4.45  | 8.53E-01 | 4.63   | 6.86  | 5.00E-01 |
| cg20436458 | -8.87  | 4.24  | 3.66E-02 | -5.90  | 10.25 | 5.65E-01 | 1.94   | 17.85  | 9.13E-01 | -9.55  | 5.13  | 6.28E-02 | -16.25 | 14.25 | 2.54E-01 |
| cg21404045 | 14.53  | 6.95  | 3.66E-02 | 14.39  | 16.80 | 3.92E-01 | 31.99  | 38.15  | 4.02E-01 | 14.74  | 8.24  | 7.35E-02 | 6.09   | 24.03 | 8.00E-01 |
| cg26360953 | -20.64 | 9.87  | 3.66E-02 | -15.91 | 19.12 | 4.05E-01 | -7.79  | 43.53  | 8.58E-01 | -20.62 | 12.86 | 1.09E-01 | -41.41 | 32.41 | 2.01E-01 |
| cg00852573 | 23.77  | 11.38 | 3.66E-02 | 13.17  | 21.87 | 5.47E-01 | 27.32  | 54.95  | 6.19E-01 | 27.87  | 14.45 | 5.37E-02 | 26.42  | 44.07 | 5.49E-01 |
| cg21646471 | 15.08  | 7.22  | 3.66E-02 | 2.89   | 17.23 | 8.67E-01 | 44.93  | 25.61  | 7.93E-02 | 17.37  | 9.20  | 5.90E-02 | 2.43   | 20.06 | 9.04E-01 |
| cg16586200 | -14.92 | 7.14  | 3.66E-02 | -24.63 | 17.68 | 1.64E-01 | 1.65   | 22.54  | 9.42E-01 | -11.19 | 8.95  | 2.11E-01 | -39.70 | 22.66 | 7.98E-02 |
| cg18031708 | -13.91 | 6.66  | 3.66E-02 | -10.04 | 10.78 | 3.52E-01 | -19.14 | 15.53  | 2.18E-01 | -19.87 | 17.34 | 2.52E-01 | -12.65 | 12.40 | 3.08E-01 |
| cg07703790 | -13.02 | 6.23  | 3.66E-02 | -30.83 | 12.87 | 1.66E-02 | -13.28 | 16.91  | 4.32E-01 | -4.36  | 7.69  | 5.71E-01 | -18.32 | 16.88 | 2.78E-01 |



|            |        |       |          |        |       |          |         |        |          |        |       |          |        |       |          |
|------------|--------|-------|----------|--------|-------|----------|---------|--------|----------|--------|-------|----------|--------|-------|----------|
| cg18357736 | 13.73  | 6.57  | 3.66E-02 | 14.51  | 8.61  | 9.17E-02 | 31.93   | 16.28  | 4.98E-02 | 11.42  | 21.88 | 6.02E-01 | -5.91  | 16.25 | 7.16E-01 |
| cg10698355 | 19.55  | 9.35  | 3.66E-02 | 17.57  | 11.86 | 1.39E-01 | -13.33  | 42.27  | 7.53E-01 | 47.20  | 27.65 | 8.79E-02 | 18.04  | 20.18 | 3.71E-01 |
| cg01796225 | -9.09  | 4.35  | 3.66E-02 | -19.48 | 7.45  | 8.87E-03 | 7.11    | 12.96  | 5.83E-01 | -6.24  | 4.10  | 1.29E-01 | -12.16 | 10.09 | 2.28E-01 |
| cg21044572 | 8.00   | 3.83  | 3.66E-02 | 10.97  | 6.31  | 8.23E-02 | 4.71    | 6.95   | 4.98E-01 | 9.14   | 9.06  | 3.13E-01 | 6.03   | 9.86  | 5.41E-01 |
| cg00160818 | 14.59  | 6.98  | 3.66E-02 | 19.01  | 13.51 | 1.59E-01 | -3.58   | 16.20  | 8.25E-01 | 19.62  | 12.11 | 1.05E-01 | 17.04  | 15.09 | 2.59E-01 |
| cg02569718 | -6.46  | 3.09  | 3.67E-02 | -5.76  | 3.97  | 1.47E-01 | -6.50   | 7.44   | 3.82E-01 | 0.11   | 10.80 | 9.92E-01 | -13.24 | 8.24  | 1.08E-01 |
| cg13454331 | -19.06 | 9.12  | 3.67E-02 | -21.07 | 25.26 | 4.04E-01 | -58.85  | 109.68 | 5.92E-01 | -20.71 | 10.20 | 4.24E-02 | 10.01  | 36.12 | 7.82E-01 |
| cg27561099 | -8.85  | 4.23  | 3.67E-02 | -12.88 | 6.68  | 5.38E-02 | 4.85    | 10.38  | 6.40E-01 | -6.04  | 5.96  | 3.11E-01 | -20.01 | 9.86  | 4.25E-02 |
| cg26428830 | -9.03  | 4.32  | 3.67E-02 | -15.92 | 7.22  | 2.73E-02 | -12.30  | 9.38   | 1.90E-01 | -3.69  | 10.19 | 7.18E-01 | -0.20  | 8.64  | 9.82E-01 |
| cg00938658 | -6.84  | 3.27  | 3.67E-02 | -7.71  | 4.72  | 1.03E-01 | -8.60   | 7.35   | 2.42E-01 | -12.99 | 10.93 | 2.35E-01 | -1.17  | 6.78  | 8.63E-01 |
| cg15888097 | -11.47 | 5.49  | 3.67E-02 | -7.79  | 7.86  | 3.22E-01 | -2.36   | 14.97  | 8.75E-01 | -14.74 | 13.16 | 2.63E-01 | -23.54 | 12.17 | 5.32E-02 |
| cg09427718 | -14.16 | 6.78  | 3.67E-02 | -17.82 | 13.53 | 1.88E-01 | -13.12  | 26.78  | 6.24E-01 | -12.21 | 8.90  | 1.70E-01 | -16.83 | 20.92 | 4.21E-01 |
| cg06961354 | -11.06 | 5.29  | 3.67E-02 | -18.10 | 11.20 | 1.06E-01 | 1.57    | 14.28  | 9.12E-01 | -9.78  | 7.46  | 1.90E-01 | -17.01 | 14.37 | 2.37E-01 |
| cg23724016 | 17.60  | 8.42  | 3.67E-02 | 19.89  | 16.47 | 2.27E-01 | 22.66   | 13.96  | 1.05E-01 | 27.59  | 17.99 | 1.25E-01 | -12.15 | 21.36 | 5.69E-01 |
| cg19573599 | -15.03 | 7.20  | 3.67E-02 | -19.61 | 13.99 | 1.61E-01 | -1.42   | 30.64  | 9.63E-01 | -18.15 | 9.56  | 5.76E-02 | 4.49   | 21.30 | 8.33E-01 |
| cg21915970 | -23.17 | 11.09 | 3.67E-02 | 1.65   | 35.69 | 9.63E-01 | 43.54   | 152.01 | 7.75E-01 | -21.94 | 12.14 | 7.08E-02 | -82.33 | 43.87 | 6.06E-02 |
| cg26470719 | 17.64  | 8.45  | 3.67E-02 | 29.10  | 16.80 | 8.33E-02 | 25.67   | 22.02  | 2.44E-01 | 6.25   | 12.48 | 6.17E-01 | 25.67  | 22.38 | 2.51E-01 |
| cg26506790 | -11.02 | 5.28  | 3.67E-02 | -11.15 | 6.79  | 1.01E-01 | -15.52  | 11.19  | 1.65E-01 | -2.81  | 23.66 | 9.06E-01 | -5.66  | 14.94 | 7.05E-01 |
| cg19569526 | -6.05  | 2.90  | 3.67E-02 | -6.01  | 4.31  | 1.63E-01 | -0.79   | 6.82   | 9.07E-01 | -8.58  | 7.55  | 2.56E-01 | -8.74  | 6.16  | 1.56E-01 |
| cg01337429 | -38.88 | 18.61 | 3.67E-02 | -41.55 | 23.93 | 8.25E-02 | 30.52   | 62.22  | 6.24E-01 | -98.18 | 53.35 | 6.57E-02 | -24.60 | 43.38 | 5.71E-01 |
| cg09147024 | -9.08  | 4.34  | 3.67E-02 | -6.67  | 6.37  | 2.95E-01 | -13.87  | 9.92   | 1.62E-01 | -14.09 | 11.92 | 2.37E-01 | -6.87  | 9.46  | 4.68E-01 |
| cg18323095 | -10.42 | 4.99  | 3.67E-02 | 0.02   | 11.23 | 9.98E-01 | 9.16    | 24.45  | 7.08E-01 | -13.23 | 6.55  | 4.33E-02 | -17.25 | 11.71 | 1.41E-01 |
| cg16303353 | 7.06   | 3.38  | 3.67E-02 | 6.49   | 4.38  | 1.38E-01 | 15.89   | 9.53   | 9.56E-02 | 7.80   | 9.18  | 3.96E-01 | 0.98   | 8.92  | 9.13E-01 |
| cg02927682 | 5.58   | 2.67  | 3.67E-02 | 4.96   | 3.54  | 1.61E-01 | 10.21   | 5.42   | 5.97E-02 | -1.57  | 11.03 | 8.87E-01 | 2.86   | 7.50  | 7.03E-01 |
| cg10824354 | -10.33 | 4.95  | 3.67E-02 | -16.93 | 6.66  | 1.11E-02 | -10.19  | 11.16  | 3.61E-01 | 8.53   | 15.39 | 5.79E-01 | -1.46  | 11.81 | 9.02E-01 |
| cg07259660 | -14.30 | 6.84  | 3.67E-02 | -17.71 | 20.06 | 3.77E-01 | 17.35   | 27.01  | 5.21E-01 | -15.46 | 7.85  | 4.90E-02 | -26.91 | 28.02 | 3.37E-01 |
| cg21663536 | 20.40  | 9.77  | 3.67E-02 | 19.62  | 17.76 | 2.69E-01 | 5.00    | 17.75  | 7.78E-01 | 29.20  | 20.63 | 1.57E-01 | 37.52  | 23.62 | 1.12E-01 |
| cg11029270 | -12.83 | 6.14  | 3.67E-02 | -25.72 | 18.18 | 1.57E-01 | 18.68   | 38.95  | 6.32E-01 | -12.95 | 6.80  | 5.68E-02 | 4.88   | 29.18 | 8.67E-01 |
| cg11617975 | 34.13  | 16.34 | 3.67E-02 | 28.68  | 20.70 | 1.66E-01 | -7.08   | 83.56  | 9.32E-01 | 45.64  | 71.32 | 5.22E-01 | 49.43  | 30.57 | 1.06E-01 |
| cg05122437 | -2.40  | 1.15  | 3.67E-02 | -1.91  | 1.80  | 2.89E-01 | -2.62   | 2.56   | 3.04E-01 | -3.42  | 2.36  | 1.48E-01 | -1.86  | 2.97  | 5.31E-01 |
| cg14630839 | -25.67 | 12.29 | 3.67E-02 | -34.17 | 40.10 | 3.94E-01 | -103.79 | 215.93 | 6.31E-01 | -20.33 | 13.42 | 1.30E-01 | -79.55 | 48.68 | 1.02E-01 |
| cg15353603 | -7.74  | 3.71  | 3.67E-02 | -7.41  | 7.03  | 2.92E-01 | -14.60  | 10.55  | 1.67E-01 | -10.44 | 5.91  | 7.75E-02 | 1.08   | 8.18  | 8.95E-01 |
| cg23481246 | 9.00   | 4.31  | 3.67E-02 | 9.59   | 5.96  | 1.08E-01 | 23.46   | 12.18  | 5.41E-02 | 5.65   | 9.22  | 5.40E-01 | -1.35  | 11.77 | 9.09E-01 |
| cg19026320 | -9.43  | 4.52  | 3.67E-02 | -12.54 | 9.85  | 2.03E-01 | -7.41   | 16.84  | 6.60E-01 | -11.59 | 5.70  | 4.19E-02 | 11.50  | 15.14 | 4.47E-01 |
| cg26982447 | 13.91  | 6.66  | 3.67E-02 | 14.54  | 14.58 | 3.19E-01 | 6.56    | 30.64  | 8.30E-01 | 12.77  | 8.63  | 1.39E-01 | 19.95  | 17.28 | 2.48E-01 |

|            |        |       |          |        |       |          |        |        |          |        |       |          |        |       |          |
|------------|--------|-------|----------|--------|-------|----------|--------|--------|----------|--------|-------|----------|--------|-------|----------|
| cg05195050 | -11.84 | 5.67  | 3.67E-02 | -30.04 | 13.42 | 2.52E-02 | 6.14   | 17.46  | 7.25E-01 | -8.79  | 6.73  | 1.92E-01 | -15.94 | 15.08 | 2.91E-01 |
| cg06652523 | 14.30  | 6.85  | 3.67E-02 | 5.71   | 11.21 | 6.11E-01 | 8.22   | 14.41  | 5.68E-01 | 24.88  | 12.79 | 5.18E-02 | 27.89  | 20.27 | 1.69E-01 |
| cg06299307 | 11.46  | 5.49  | 3.67E-02 | 14.17  | 15.74 | 3.68E-01 | 16.45  | 68.18  | 8.09E-01 | 10.41  | 6.31  | 9.91E-02 | 15.23  | 16.14 | 3.45E-01 |
| cg26546664 | 13.82  | 6.61  | 3.67E-02 | 25.02  | 10.15 | 1.37E-02 | 2.67   | 12.28  | 8.28E-01 | 20.03  | 20.26 | 3.23E-01 | 1.54   | 15.67 | 9.22E-01 |
| cg20540372 | -11.59 | 5.55  | 3.67E-02 | -24.06 | 15.95 | 1.31E-01 | -17.92 | 23.66  | 4.49E-01 | -11.90 | 6.35  | 6.12E-02 | 22.29  | 22.30 | 3.18E-01 |
| cg13480197 | 6.18   | 2.96  | 3.68E-02 | 4.54   | 3.42  | 1.84E-01 | 15.72  | 7.88   | 4.61E-02 | 11.50  | 14.71 | 4.34E-01 | 1.40   | 11.28 | 9.01E-01 |
| cg26737458 | -47.07 | 22.54 | 3.68E-02 | -33.11 | 61.83 | 5.92E-01 | -57.85 | 227.68 | 7.99E-01 | -47.19 | 25.80 | 6.73E-02 | -64.65 | 73.48 | 3.79E-01 |
| cg11795488 | -10.47 | 5.01  | 3.68E-02 | -17.08 | 7.34  | 2.00E-02 | -9.05  | 11.96  | 4.49E-01 | 6.98   | 14.55 | 6.31E-01 | -7.29  | 10.24 | 4.77E-01 |
| cg09753778 | -12.14 | 5.81  | 3.68E-02 | -6.30  | 19.03 | 7.41E-01 | -12.09 | 38.68  | 7.55E-01 | -13.38 | 6.30  | 3.37E-02 | 3.58   | 32.26 | 9.12E-01 |
| cg09571972 | 5.39   | 2.58  | 3.68E-02 | 4.11   | 3.45  | 2.34E-01 | 8.00   | 5.66   | 1.57E-01 | 8.67   | 8.99  | 3.35E-01 | 4.73   | 6.67  | 4.78E-01 |
| cg01021488 | -16.59 | 7.95  | 3.68E-02 | -21.28 | 12.20 | 8.12E-02 | -19.49 | 18.28  | 2.86E-01 | -25.26 | 20.00 | 2.07E-01 | 0.42   | 16.59 | 9.80E-01 |
| cg26823505 | -8.85  | 4.24  | 3.68E-02 | -7.17  | 6.30  | 2.55E-01 | -12.22 | 9.30   | 1.89E-01 | -7.90  | 11.31 | 4.85E-01 | -9.80  | 9.48  | 3.01E-01 |
| cg15296767 | 7.04   | 3.37  | 3.68E-02 | 8.85   | 4.36  | 4.24E-02 | 10.60  | 7.43   | 1.54E-01 | -0.83  | 12.49 | 9.47E-01 | -3.04  | 9.61  | 7.52E-01 |
| cg05337387 | -7.95  | 3.80  | 3.68E-02 | -16.46 | 8.26  | 4.61E-02 | -0.60  | 12.20  | 9.61E-01 | -5.53  | 5.13  | 2.81E-01 | -9.62  | 10.16 | 3.44E-01 |
| cg21960859 | 27.81  | 13.32 | 3.68E-02 | 42.83  | 15.68 | 6.30E-03 | -9.70  | 35.86  | 7.87E-01 | 59.25  | 33.44 | 7.64E-02 | 7.69   | 20.19 | 7.03E-01 |
| cg14932715 | -12.03 | 5.76  | 3.68E-02 | -16.25 | 15.26 | 2.87E-01 | -1.05  | 24.04  | 9.65E-01 | -8.07  | 6.90  | 2.42E-01 | -39.25 | 17.99 | 2.91E-02 |
| cg21588838 | -9.38  | 4.49  | 3.68E-02 | -24.96 | 10.69 | 1.96E-02 | -15.55 | 18.62  | 4.04E-01 | -4.50  | 5.16  | 3.83E-01 | -10.65 | 12.47 | 3.93E-01 |
| cg01958008 | -8.56  | 4.10  | 3.68E-02 | 1.22   | 9.53  | 8.98E-01 | -5.01  | 14.62  | 7.32E-01 | -9.59  | 5.00  | 5.51E-02 | -30.21 | 16.16 | 6.15E-02 |
| cg11309496 | 14.93  | 7.15  | 3.68E-02 | 38.49  | 19.65 | 5.01E-02 | 34.57  | 54.88  | 5.29E-01 | 9.35   | 8.38  | 2.65E-01 | 19.91  | 20.43 | 3.30E-01 |
| cg17091312 | -13.52 | 6.47  | 3.68E-02 | -8.14  | 17.66 | 6.45E-01 | -21.81 | 22.64  | 3.35E-01 | -13.51 | 7.75  | 8.14E-02 | -14.10 | 22.02 | 5.22E-01 |
| cg02410887 | 20.95  | 10.03 | 3.68E-02 | 23.10  | 13.85 | 9.53E-02 | 21.10  | 32.43  | 5.15E-01 | 55.37  | 23.94 | 2.08E-02 | 3.15   | 14.87 | 8.32E-01 |
| cg15083775 | -17.47 | 8.37  | 3.68E-02 | 3.37   | 18.30 | 8.54E-01 | -14.63 | 19.78  | 4.60E-01 | -22.05 | 12.16 | 6.99E-02 | -37.02 | 22.50 | 9.99E-02 |
| cg03193472 | 8.57   | 4.10  | 3.68E-02 | 7.25   | 5.98  | 2.25E-01 | 9.17   | 8.46   | 2.79E-01 | 13.01  | 12.49 | 2.98E-01 | 8.60   | 9.55  | 3.68E-01 |
| cg05314679 | 27.62  | 13.23 | 3.68E-02 | 21.30  | 22.47 | 3.43E-01 | 10.36  | 60.39  | 8.64E-01 | 40.67  | 36.07 | 2.59E-01 | 30.31  | 19.28 | 1.16E-01 |
| cg11159650 | 29.81  | 14.28 | 3.68E-02 | 55.57  | 40.02 | 1.65E-01 | -79.22 | 159.38 | 6.19E-01 | 25.85  | 16.12 | 1.09E-01 | 38.57  | 50.45 | 4.45E-01 |
| cg04363470 | -8.63  | 4.13  | 3.68E-02 | -10.21 | 6.01  | 8.92E-02 | -5.03  | 9.41   | 5.93E-01 | -12.73 | 15.68 | 4.17E-01 | -7.34  | 8.03  | 3.61E-01 |
| cg18440523 | -12.20 | 5.84  | 3.68E-02 | -8.29  | 11.54 | 4.72E-01 | -25.09 | 16.70  | 1.33E-01 | -8.53  | 8.84  | 3.35E-01 | -17.74 | 13.59 | 1.92E-01 |
| cg16524818 | -8.54  | 4.09  | 3.68E-02 | -15.04 | 8.36  | 7.21E-02 | -0.62  | 15.92  | 9.69E-01 | -5.63  | 5.53  | 3.09E-01 | -12.34 | 10.65 | 2.47E-01 |
| cg14977433 | -11.05 | 5.29  | 3.68E-02 | -15.21 | 7.37  | 3.90E-02 | -26.74 | 10.47  | 1.06E-02 | -7.66  | 5.35  | 1.53E-01 | 5.36   | 11.11 | 6.30E-01 |
| cg13967908 | -5.01  | 2.40  | 3.68E-02 | -1.97  | 4.22  | 6.41E-01 | -7.57  | 5.94   | 2.02E-01 | -5.97  | 3.71  | 1.07E-01 | -6.80  | 7.88  | 3.88E-01 |
| cg02108850 | 14.64  | 7.01  | 3.68E-02 | 39.37  | 24.77 | 1.12E-01 | 101.85 | 103.08 | 3.23E-01 | 11.80  | 7.76  | 1.28E-01 | 13.99  | 22.43 | 5.33E-01 |
| cg20458244 | 27.26  | 13.06 | 3.68E-02 | 34.63  | 21.97 | 1.15E-01 | 39.78  | 23.90  | 9.60E-02 | 6.89   | 8.94  | 4.41E-01 | 67.22  | 31.95 | 3.54E-02 |
| cg09415366 | -9.13  | 4.37  | 3.68E-02 | -11.14 | 5.74  | 5.23E-02 | -11.96 | 10.81  | 2.69E-01 | -0.83  | 18.34 | 9.64E-01 | -3.32  | 9.78  | 7.34E-01 |
| cg24603408 | 15.05  | 7.21  | 3.68E-02 | 8.17   | 15.12 | 5.89E-01 | 50.99  | 44.11  | 2.48E-01 | 17.72  | 8.70  | 4.17E-02 | -5.53  | 29.41 | 8.51E-01 |
| cg11792824 | -11.20 | 5.37  | 3.68E-02 | -21.96 | 13.51 | 1.04E-01 | -5.53  | 29.57  | 8.52E-01 | -11.22 | 6.26  | 7.30E-02 | 9.52   | 19.81 | 6.31E-01 |

|            |        |       |          |        |       |          |         |        |          |         |       |          |        |       |          |
|------------|--------|-------|----------|--------|-------|----------|---------|--------|----------|---------|-------|----------|--------|-------|----------|
| cg09740554 | -16.54 | 7.92  | 3.68E-02 | -26.30 | 11.53 | 2.25E-02 | -10.24  | 23.72  | 6.66E-01 | 17.84   | 34.60 | 6.06E-01 | -10.75 | 13.14 | 4.13E-01 |
| cg19009471 | -8.37  | 4.01  | 3.68E-02 | -6.77  | 5.45  | 2.14E-01 | -4.25   | 9.24   | 6.46E-01 | -5.08   | 12.35 | 6.81E-01 | -20.49 | 9.90  | 3.84E-02 |
| cg10755085 | 10.00  | 4.79  | 3.68E-02 | 13.36  | 6.63  | 4.40E-02 | 12.86   | 11.16  | 2.49E-01 | 8.10    | 12.78 | 5.26E-01 | -3.04  | 12.18 | 8.03E-01 |
| cg25700339 | 13.98  | 6.69  | 3.68E-02 | 14.53  | 9.63  | 1.31E-01 | 9.96    | 14.48  | 4.91E-01 | 7.83    | 17.42 | 6.53E-01 | 23.63  | 17.00 | 1.64E-01 |
| cg02023717 | -12.16 | 5.83  | 3.69E-02 | -33.60 | 18.11 | 6.34E-02 | 1.82    | 36.72  | 9.61E-01 | -8.92   | 6.52  | 1.71E-01 | -22.13 | 21.69 | 3.08E-01 |
| cg25478600 | 8.09   | 3.88  | 3.69E-02 | 9.63   | 6.88  | 1.62E-01 | 23.52   | 11.67  | 4.38E-02 | 7.98    | 5.61  | 1.55E-01 | -2.06  | 8.35  | 8.05E-01 |
| cg01794563 | -34.49 | 16.52 | 3.69E-02 | -43.70 | 39.72 | 2.71E-01 | -150.28 | 110.57 | 1.74E-01 | -25.63  | 19.42 | 1.87E-01 | -62.11 | 58.10 | 2.85E-01 |
| cg06098530 | 9.68   | 4.64  | 3.69E-02 | 16.42  | 6.74  | 1.49E-02 | 5.55    | 15.76  | 7.24E-01 | 5.32    | 16.54 | 7.48E-01 | 2.80   | 7.71  | 7.16E-01 |
| cg21775570 | 7.75   | 3.71  | 3.69E-02 | 6.71   | 4.80  | 1.62E-01 | 18.83   | 10.52  | 7.35E-02 | 11.35   | 10.97 | 3.01E-01 | 0.54   | 9.23  | 9.53E-01 |
| cg01616394 | 12.77  | 6.12  | 3.69E-02 | 7.18   | 10.88 | 5.09E-01 | 23.48   | 15.95  | 1.41E-01 | 7.97    | 10.85 | 4.63E-01 | 20.60  | 13.07 | 1.15E-01 |
| cg12529083 | 33.23  | 15.92 | 3.69E-02 | -31.14 | 49.93 | 5.33E-01 | -46.89  | 179.03 | 7.93E-01 | 38.57   | 18.08 | 3.29E-02 | 59.62  | 46.88 | 2.03E-01 |
| cg08970112 | 9.08   | 4.35  | 3.69E-02 | 14.07  | 10.23 | 1.69E-01 | 18.57   | 17.24  | 2.81E-01 | 7.90    | 5.42  | 1.45E-01 | 2.37   | 13.07 | 8.56E-01 |
| cg23626122 | 9.90   | 4.75  | 3.69E-02 | 12.68  | 7.08  | 7.33E-02 | 8.74    | 11.93  | 4.64E-01 | 19.45   | 14.82 | 1.89E-01 | 2.86   | 8.82  | 7.45E-01 |
| cg01852522 | -9.21  | 4.41  | 3.69E-02 | -14.16 | 7.12  | 4.67E-02 | 9.26    | 12.41  | 4.56E-01 | -13.52  | 9.46  | 1.53E-01 | -7.33  | 8.45  | 3.86E-01 |
| cg12881470 | -49.61 | 23.77 | 3.69E-02 | -15.66 | 18.69 | 4.02E-01 | -55.07  | 51.31  | 2.83E-01 | -106.58 | 72.69 | 1.43E-01 | -95.45 | 40.11 | 1.73E-02 |
| cg24308847 | 12.14  | 5.82  | 3.69E-02 | 5.65   | 8.27  | 4.95E-01 | 13.36   | 14.09  | 3.43E-01 | 36.81   | 15.83 | 2.00E-02 | 10.25  | 11.97 | 3.92E-01 |
| cg18362448 | 7.20   | 3.45  | 3.69E-02 | 7.54   | 4.72  | 1.10E-01 | -0.40   | 7.86   | 9.59E-01 | 24.13   | 11.70 | 3.92E-02 | 6.28   | 7.47  | 4.00E-01 |
| cg15646741 | 16.48  | 7.90  | 3.69E-02 | 13.35  | 9.55  | 1.62E-01 | 42.85   | 17.57  | 1.47E-02 | -9.52   | 28.73 | 7.40E-01 | 10.30  | 16.07 | 5.21E-01 |
| cg20168554 | 17.43  | 8.35  | 3.69E-02 | 19.68  | 16.91 | 2.45E-01 | 1.14    | 32.37  | 9.72E-01 | 16.25   | 11.03 | 1.41E-01 | 27.84  | 24.46 | 2.55E-01 |
| cg01934781 | -8.29  | 3.97  | 3.69E-02 | -16.92 | 6.29  | 7.13E-03 | -3.17   | 7.90   | 6.89E-01 | -0.01   | 8.41  | 1.00E+00 | -7.72  | 8.37  | 3.56E-01 |
| cg01436998 | 14.97  | 7.18  | 3.69E-02 | 14.16  | 12.13 | 2.43E-01 | 5.19    | 22.23  | 8.15E-01 | 40.28   | 17.63 | 2.23E-02 | 7.37   | 11.64 | 5.27E-01 |
| cg05136804 | 6.15   | 2.95  | 3.69E-02 | 6.19   | 4.13  | 1.34E-01 | 8.05    | 6.16   | 1.91E-01 | 13.86   | 9.73  | 1.54E-01 | -0.73  | 7.18  | 9.19E-01 |
| cg07727358 | -74.15 | 35.53 | 3.69E-02 | -60.74 | 45.71 | 1.84E-01 | -49.83  | 178.65 | 7.80E-01 | -170.57 | 79.97 | 3.29E-02 | -11.34 | 89.16 | 8.99E-01 |
| cg00278359 | -13.36 | 6.40  | 3.69E-02 | -4.17  | 7.38  | 5.72E-01 | -26.10  | 14.13  | 6.48E-02 | -7.34   | 12.49 | 5.57E-01 | -29.09 | 13.11 | 2.66E-02 |
| cg19083007 | -8.18  | 3.92  | 3.69E-02 | -14.51 | 8.54  | 8.94E-02 | -12.49  | 15.13  | 4.09E-01 | -4.68   | 5.25  | 3.72E-01 | -10.24 | 9.70  | 2.91E-01 |
| cg14605274 | -11.52 | 5.52  | 3.69E-02 | -4.06  | 11.26 | 7.19E-01 | -17.85  | 28.71  | 5.34E-01 | -13.90  | 6.89  | 4.35E-02 | -11.83 | 19.46 | 5.43E-01 |
| cg21717629 | 9.03   | 4.33  | 3.69E-02 | 12.10  | 7.62  | 1.13E-01 | -5.00   | 9.48   | 5.98E-01 | 11.23   | 7.26  | 1.22E-01 | 18.39  | 12.28 | 1.34E-01 |
| cg19961043 | 14.05  | 6.74  | 3.69E-02 | 14.08  | 15.52 | 3.64E-01 | 21.03   | 15.53  | 1.76E-01 | 12.71   | 9.99  | 2.03E-01 | 9.88   | 16.39 | 5.46E-01 |
| cg26671050 | -12.30 | 5.90  | 3.69E-02 | -11.22 | 13.28 | 3.98E-01 | -22.08  | 23.23  | 3.42E-01 | -14.16  | 7.34  | 5.36E-02 | 5.21   | 19.41 | 7.88E-01 |
| cg19272468 | 7.43   | 3.56  | 3.69E-02 | 6.44   | 6.03  | 2.85E-01 | 8.80    | 7.11   | 2.16E-01 | 8.99    | 7.03  | 2.01E-01 | 4.66   | 9.37  | 6.19E-01 |
| cg02770688 | -23.04 | 11.04 | 3.69E-02 | -27.79 | 10.29 | 6.90E-03 | 25.22   | 28.21  | 3.71E-01 | -49.00  | 20.96 | 1.94E-02 | -18.40 | 17.86 | 3.03E-01 |
| cg26429674 | -30.06 | 14.41 | 3.69E-02 | -43.46 | 17.15 | 1.13E-02 | 36.57   | 42.08  | 3.85E-01 | -55.35  | 26.73 | 3.84E-02 | -18.05 | 20.67 | 3.83E-01 |
| cg17787710 | -23.68 | 11.35 | 3.69E-02 | -22.66 | 16.29 | 1.64E-01 | -24.37  | 30.44  | 4.23E-01 | -38.53  | 31.77 | 2.25E-01 | -17.65 | 22.78 | 4.39E-01 |
| cg24652615 | 3.17   | 1.52  | 3.69E-02 | 1.53   | 2.17  | 4.82E-01 | 4.23    | 3.00   | 1.58E-01 | 11.60   | 5.69  | 4.15E-02 | 2.80   | 3.57  | 4.32E-01 |
| cg09159285 | 7.97   | 3.82  | 3.69E-02 | 11.45  | 5.88  | 5.14E-02 | 6.71    | 8.56   | 4.33E-01 | 13.52   | 8.90  | 1.28E-01 | -3.57  | 8.67  | 6.80E-01 |

|            |        |       |          |         |       |          |         |        |          |        |       |          |        |       |          |
|------------|--------|-------|----------|---------|-------|----------|---------|--------|----------|--------|-------|----------|--------|-------|----------|
| cg04170999 | 15.12  | 7.25  | 3.69E-02 | 1.71    | 22.01 | 9.38E-01 | 5.77    | 67.64  | 9.32E-01 | 18.19  | 8.19  | 2.62E-02 | 6.32   | 23.34 | 7.87E-01 |
| cg05379597 | 7.84   | 3.76  | 3.69E-02 | 7.32    | 4.90  | 1.36E-01 | 17.44   | 8.99   | 5.25E-02 | 2.73   | 11.61 | 8.14E-01 | 1.58   | 10.30 | 8.78E-01 |
| cg22543026 | 15.63  | 7.49  | 3.69E-02 | 24.54   | 9.78  | 1.21E-02 | -7.78   | 24.24  | 7.48E-01 | 3.80   | 39.47 | 9.23E-01 | 6.53   | 14.12 | 6.44E-01 |
| cg10166825 | -8.50  | 4.07  | 3.69E-02 | -14.59  | 8.55  | 8.80E-02 | -3.66   | 11.81  | 7.57E-01 | -6.67  | 5.74  | 2.45E-01 | -9.26  | 10.50 | 3.77E-01 |
| cg21663666 | -18.59 | 8.91  | 3.69E-02 | -21.39  | 14.90 | 1.51E-01 | -6.39   | 65.15  | 9.22E-01 | -41.31 | 21.12 | 5.05E-02 | -7.78  | 13.35 | 5.60E-01 |
| cg07589081 | 34.61  | 16.59 | 3.69E-02 | 55.57   | 45.90 | 2.26E-01 | -108.18 | 171.36 | 5.28E-01 | 30.03  | 18.69 | 1.08E-01 | 65.23  | 61.71 | 2.90E-01 |
| cg13107669 | 16.78  | 8.04  | 3.69E-02 | 4.27    | 15.66 | 7.85E-01 | 23.93   | 17.55  | 1.73E-01 | 21.29  | 13.59 | 1.17E-01 | 17.99  | 19.15 | 3.48E-01 |
| cg04078658 | 45.46  | 21.79 | 3.69E-02 | 56.01   | 29.96 | 6.16E-02 | 80.49   | 70.31  | 2.52E-01 | 15.99  | 44.68 | 7.20E-01 | 31.39  | 58.74 | 5.93E-01 |
| cg26951875 | 25.82  | 12.38 | 3.69E-02 | 6.93    | 35.22 | 8.44E-01 | 254.40  | 185.52 | 1.70E-01 | 27.98  | 13.66 | 4.05E-02 | 16.87  | 54.77 | 7.58E-01 |
| cg15717598 | -34.40 | 16.49 | 3.69E-02 | -33.14  | 21.35 | 1.21E-01 | -97.49  | 69.03  | 1.58E-01 | -26.63 | 38.83 | 4.93E-01 | -25.69 | 40.40 | 5.25E-01 |
| cg18879793 | -43.47 | 20.84 | 3.69E-02 | -41.42  | 26.32 | 1.16E-01 | -112.40 | 60.52  | 6.33E-02 | 19.45  | 64.75 | 7.64E-01 | -41.04 | 53.58 | 4.44E-01 |
| cg08971667 | 12.25  | 5.87  | 3.70E-02 | 14.10   | 8.49  | 9.68E-02 | 28.41   | 14.46  | 4.95E-02 | 8.78   | 15.01 | 5.58E-01 | -2.54  | 13.00 | 8.45E-01 |
| cg16000683 | -11.63 | 5.57  | 3.70E-02 | -16.04  | 9.25  | 8.28E-02 | -10.01  | 13.13  | 4.46E-01 | -10.29 | 11.02 | 3.50E-01 | -6.80  | 12.45 | 5.85E-01 |
| cg02048651 | 20.81  | 9.97  | 3.70E-02 | 32.61   | 18.71 | 8.12E-02 | 18.51   | 18.74  | 3.23E-01 | 1.34   | 18.27 | 9.42E-01 | 43.82  | 27.19 | 1.07E-01 |
| cg08777490 | -27.82 | 13.33 | 3.70E-02 | -28.06  | 17.30 | 1.05E-01 | 8.21    | 42.63  | 8.47E-01 | -47.87 | 75.47 | 5.26E-01 | -37.80 | 25.36 | 1.36E-01 |
| cg11586890 | 17.28  | 8.28  | 3.70E-02 | 19.27   | 13.10 | 1.41E-01 | 20.27   | 15.79  | 1.99E-01 | 5.83   | 19.36 | 7.63E-01 | 20.65  | 22.01 | 3.48E-01 |
| cg13451548 | 14.09  | 6.75  | 3.70E-02 | 17.35   | 13.59 | 2.02E-01 | 22.04   | 27.56  | 4.24E-01 | 16.39  | 9.94  | 9.90E-02 | 3.93   | 14.05 | 7.80E-01 |
| cg21195176 | 33.72  | 16.16 | 3.70E-02 | 39.05   | 21.21 | 6.56E-02 | 68.92   | 30.83  | 2.54E-02 | -28.90 | 42.47 | 4.96E-01 | 24.67  | 30.98 | 4.26E-01 |
| cg23675837 | 23.20  | 11.12 | 3.70E-02 | 44.67   | 19.64 | 2.29E-02 | 10.13   | 22.94  | 6.59E-01 | 4.20   | 21.80 | 8.47E-01 | 29.39  | 25.96 | 2.58E-01 |
| cg10233953 | -11.91 | 5.71  | 3.70E-02 | -19.81  | 10.72 | 6.47E-02 | -17.82  | 13.03  | 1.72E-01 | -6.94  | 8.85  | 4.33E-01 | 0.11   | 17.29 | 9.95E-01 |
| cg16250355 | -29.10 | 13.95 | 3.70E-02 | -28.04  | 17.13 | 1.02E-01 | -29.74  | 48.17  | 5.37E-01 | 10.49  | 48.43 | 8.29E-01 | -52.16 | 33.79 | 1.23E-01 |
| cg04669895 | -10.99 | 5.27  | 3.70E-02 | -19.67  | 15.99 | 2.19E-01 | -2.66   | 26.94  | 9.21E-01 | -10.93 | 5.97  | 6.70E-02 | -3.17  | 19.38 | 8.70E-01 |
| cg19242459 | 19.81  | 9.50  | 3.70E-02 | 3.78    | 20.97 | 8.57E-01 | 34.05   | 21.52  | 1.14E-01 | 17.16  | 13.93 | 2.18E-01 | 32.75  | 25.81 | 2.05E-01 |
| cg09736083 | 26.47  | 12.69 | 3.70E-02 | 37.43   | 17.07 | 2.83E-02 | -14.56  | 30.11  | 6.29E-01 | 6.47   | 33.61 | 8.47E-01 | 46.69  | 26.11 | 7.38E-02 |
| cg02504465 | -49.16 | 23.57 | 3.70E-02 | -119.63 | 55.76 | 3.19E-02 | 15.27   | 206.21 | 9.41E-01 | -46.98 | 25.54 | 6.58E-02 | 30.50  | 66.57 | 6.47E-01 |
| cg10389812 | -6.49  | 3.11  | 3.70E-02 | -3.82   | 6.28  | 5.44E-01 | -5.91   | 5.37   | 2.71E-01 | -10.28 | 5.98  | 8.57E-02 | -5.30  | 8.05  | 5.11E-01 |
| cg15215077 | 17.44  | 8.36  | 3.70E-02 | 37.57   | 16.41 | 2.20E-02 | 2.84    | 22.24  | 8.99E-01 | 9.10   | 8.81  | 3.02E-01 | 40.09  | 26.61 | 1.32E-01 |
| cg26372254 | 17.47  | 8.37  | 3.70E-02 | 17.86   | 15.47 | 2.48E-01 | -10.87  | 32.95  | 7.42E-01 | 16.57  | 12.06 | 1.69E-01 | 30.87  | 20.92 | 1.40E-01 |
| cg25268422 | -13.00 | 6.23  | 3.70E-02 | -16.81  | 9.51  | 7.70E-02 | -15.55  | 13.82  | 2.61E-01 | -11.30 | 14.80 | 4.45E-01 | -3.21  | 14.31 | 8.23E-01 |
| cg18447402 | -15.54 | 7.45  | 3.70E-02 | -30.31  | 11.14 | 6.52E-03 | -22.84  | 26.95  | 3.97E-01 | -4.78  | 5.03  | 3.42E-01 | -19.91 | 14.02 | 1.55E-01 |
| cg23887102 | 11.96  | 5.73  | 3.70E-02 | -4.53   | 12.60 | 7.19E-01 | 7.79    | 15.66  | 6.19E-01 | 17.29  | 7.49  | 2.10E-02 | 23.62  | 21.18 | 2.65E-01 |
| cg22524061 | 8.29   | 3.98  | 3.70E-02 | 16.25   | 8.56  | 5.77E-02 | 5.35    | 13.64  | 6.95E-01 | 5.96   | 5.91  | 3.13E-01 | 6.63   | 7.99  | 4.07E-01 |
| cg18491744 | -11.68 | 5.60  | 3.70E-02 | 0.96    | 13.88 | 9.45E-01 | -24.21  | 19.82  | 2.22E-01 | -15.59 | 5.31  | 3.31E-03 | 14.21  | 20.77 | 4.94E-01 |
| cg11270042 | 16.06  | 7.70  | 3.70E-02 | 52.15   | 24.22 | 3.13E-02 | 46.62   | 67.26  | 4.88E-01 | 10.83  | 8.69  | 2.13E-01 | 16.65  | 24.28 | 4.93E-01 |
| cg26629730 | 11.52  | 5.52  | 3.70E-02 | 4.51    | 8.47  | 5.95E-01 | 8.11    | 11.46  | 4.79E-01 | 24.27  | 16.43 | 1.40E-01 | 21.63  | 11.51 | 6.03E-02 |

|            |        |       |          |        |       |          |         |        |          |         |        |          |        |       |          |
|------------|--------|-------|----------|--------|-------|----------|---------|--------|----------|---------|--------|----------|--------|-------|----------|
| cg04958658 | 15.73  | 7.54  | 3.70E-02 | 38.98  | 19.24 | 4.27E-02 | 11.21   | 21.54  | 6.03E-01 | 15.13   | 9.56   | 1.14E-01 | -10.27 | 23.64 | 6.64E-01 |
| cg00408678 | 14.01  | 6.72  | 3.70E-02 | 22.88  | 11.57 | 4.81E-02 | 29.12   | 13.28  | 2.83E-02 | 3.67    | 5.02   | 4.64E-01 | 14.68  | 15.90 | 3.56E-01 |
| cg27160578 | -11.39 | 5.46  | 3.70E-02 | -12.38 | 7.74  | 1.10E-01 | 4.33    | 14.42  | 7.64E-01 | -14.99  | 16.78  | 3.72E-01 | -16.87 | 10.88 | 1.21E-01 |
| cg09242721 | 15.60  | 7.48  | 3.70E-02 | 11.79  | 13.48 | 3.82E-01 | -2.67   | 18.45  | 8.85E-01 | 31.65   | 12.92  | 1.43E-02 | 9.37   | 17.06 | 5.83E-01 |
| cg12836863 | 6.05   | 2.90  | 3.70E-02 | 5.74   | 4.14  | 1.66E-01 | 7.91    | 6.18   | 2.01E-01 | 12.65   | 7.66   | 9.88E-02 | -2.16  | 7.57  | 7.75E-01 |
| cg17895289 | -31.52 | 15.11 | 3.70E-02 | -45.10 | 41.66 | 2.79E-01 | -119.00 | 231.97 | 6.08E-01 | -31.41  | 17.04  | 6.53E-02 | -4.68  | 54.38 | 9.31E-01 |
| cg13698996 | 28.38  | 13.61 | 3.70E-02 | 32.99  | 52.43 | 5.29E-01 | -116.67 | 192.03 | 5.43E-01 | 25.07   | 16.18  | 1.21E-01 | 40.92  | 29.00 | 1.58E-01 |
| cg00259279 | 22.00  | 10.55 | 3.70E-02 | 53.55  | 18.37 | 3.55E-03 | 0.77    | 18.66  | 9.67E-01 | 14.77   | 10.34  | 1.53E-01 | 25.95  | 24.31 | 2.86E-01 |
| cg02687288 | -11.67 | 5.60  | 3.70E-02 | -6.19  | 9.57  | 5.18E-01 | -23.46  | 12.91  | 6.93E-02 | -1.85   | 13.06  | 8.87E-01 | -16.80 | 10.46 | 1.08E-01 |
| cg11728578 | 30.01  | 14.39 | 3.70E-02 | 18.77  | 22.37 | 4.01E-01 | 65.93   | 92.39  | 4.75E-01 | 5.23    | 47.01  | 9.11E-01 | 43.05  | 21.03 | 4.07E-02 |
| cg19734536 | -18.96 | 9.09  | 3.70E-02 | -15.09 | 11.68 | 1.96E-01 | -34.36  | 20.80  | 9.85E-02 | 16.63   | 42.34  | 6.94E-01 | -25.69 | 23.01 | 2.64E-01 |
| cg15552370 | -12.26 | 5.88  | 3.70E-02 | -15.10 | 11.18 | 1.77E-01 | -20.54  | 15.98  | 1.99E-01 | -16.85  | 9.80   | 8.56E-02 | 3.29   | 12.29 | 7.89E-01 |
| cg16288579 | -43.19 | 20.71 | 3.70E-02 | -52.41 | 25.14 | 3.70E-02 | -19.19  | 87.39  | 8.26E-01 | -100.06 | 46.05  | 2.98E-02 | 3.32   | 35.09 | 9.25E-01 |
| cg08273672 | -13.82 | 6.63  | 3.70E-02 | -21.40 | 9.82  | 2.94E-02 | -4.27   | 15.67  | 7.85E-01 | -4.29   | 18.65  | 8.18E-01 | -11.57 | 13.53 | 3.92E-01 |
| cg21910663 | 25.16  | 12.06 | 3.70E-02 | 22.45  | 16.23 | 1.66E-01 | 69.60   | 44.53  | 1.18E-01 | -15.67  | 44.42  | 7.24E-01 | 29.31  | 22.03 | 1.83E-01 |
| cg18555289 | 20.46  | 9.81  | 3.70E-02 | 32.03  | 19.20 | 9.54E-02 | 20.90   | 17.40  | 2.30E-01 | 7.68    | 18.83  | 6.83E-01 | 22.55  | 25.38 | 3.74E-01 |
| cg04195807 | 20.86  | 10.00 | 3.70E-02 | 22.27  | 20.02 | 2.66E-01 | 34.36   | 22.05  | 1.19E-01 | 2.99    | 15.79  | 8.50E-01 | 49.12  | 26.45 | 6.33E-02 |
| cg12019717 | 21.79  | 10.45 | 3.71E-02 | 25.04  | 10.97 | 2.25E-02 | 16.15   | 115.06 | 8.88E-01 | 9.38    | 66.36  | 8.88E-01 | -21.81 | 42.84 | 6.11E-01 |
| cg00797346 | 26.71  | 12.81 | 3.71E-02 | 31.69  | 16.52 | 5.50E-02 | -8.67   | 42.34  | 8.38E-01 | 98.91   | 59.38  | 9.58E-02 | 14.74  | 25.10 | 5.57E-01 |
| cg06428797 | -9.65  | 4.63  | 3.71E-02 | -9.35  | 10.41 | 3.69E-01 | 1.37    | 13.16  | 9.17E-01 | -9.92   | 6.39   | 1.21E-01 | -17.96 | 11.78 | 1.27E-01 |
| cg18996274 | -12.22 | 5.86  | 3.71E-02 | -20.64 | 11.59 | 7.51E-02 | -8.60   | 13.84  | 5.34E-01 | -11.54  | 9.05   | 2.02E-01 | -3.87  | 15.35 | 8.01E-01 |
| cg08230695 | 31.94  | 15.32 | 3.71E-02 | 59.24  | 42.75 | 1.66E-01 | -157.10 | 209.85 | 4.54E-01 | 31.42   | 17.37  | 7.05E-02 | 8.29   | 51.57 | 8.72E-01 |
| cg18955704 | 20.10  | 9.64  | 3.71E-02 | 28.94  | 18.42 | 1.16E-01 | -48.85  | 95.78  | 6.10E-01 | 20.23   | 12.47  | 1.05E-01 | 4.89   | 28.05 | 8.62E-01 |
| cg27207796 | 21.93  | 10.52 | 3.71E-02 | 38.55  | 44.07 | 3.82E-01 | -57.07  | 167.77 | 7.34E-01 | 19.64   | 11.32  | 8.27E-02 | 39.72  | 38.28 | 3.00E-01 |
| cg20915029 | -36.43 | 17.47 | 3.71E-02 | -30.10 | 20.95 | 1.51E-01 | 26.40   | 85.31  | 7.57E-01 | -45.80  | 59.02  | 4.38E-01 | -71.91 | 41.75 | 8.50E-02 |
| cg04601137 | 9.57   | 4.59  | 3.71E-02 | 13.42  | 6.25  | 3.18E-02 | 8.46    | 12.87  | 5.11E-01 | 9.33    | 11.65  | 4.23E-01 | -1.12  | 10.90 | 9.18E-01 |
| cg06561892 | 18.28  | 8.77  | 3.71E-02 | 40.20  | 21.19 | 5.79E-02 | 5.26    | 58.90  | 9.29E-01 | 13.27   | 10.26  | 1.96E-01 | 20.91  | 31.80 | 5.11E-01 |
| cg08410227 | -12.62 | 6.05  | 3.71E-02 | -24.98 | 8.70  | 4.11E-03 | -2.61   | 13.28  | 8.44E-01 | -5.77   | 14.98  | 7.00E-01 | -4.27  | 11.60 | 7.12E-01 |
| cg04845144 | 31.46  | 15.09 | 3.71E-02 | -31.70 | 46.31 | 4.94E-01 | -23.84  | 170.55 | 8.89E-01 | 43.53   | 15.92  | 6.25E-03 | -8.76  | 56.96 | 8.78E-01 |
| cg20172563 | 7.94   | 3.81  | 3.71E-02 | 11.89  | 8.05  | 1.40E-01 | 5.10    | 10.92  | 6.41E-01 | 9.33    | 5.13   | 6.87E-02 | -4.91  | 11.96 | 6.82E-01 |
| cg06418531 | -48.22 | 23.13 | 3.71E-02 | -42.96 | 28.45 | 1.31E-01 | -120.31 | 110.94 | 2.78E-01 | 39.08   | 103.06 | 7.05E-01 | -67.53 | 46.69 | 1.48E-01 |
| cg04456238 | 9.39   | 4.50  | 3.71E-02 | 16.93  | 6.79  | 1.26E-02 | 5.52    | 10.72  | 6.07E-01 | 7.23    | 9.97   | 4.68E-01 | -2.86  | 10.64 | 7.88E-01 |
| cg14265033 | -8.27  | 3.97  | 3.71E-02 | -11.16 | 8.19  | 1.73E-01 | -14.12  | 16.16  | 3.82E-01 | -5.24   | 5.08   | 3.02E-01 | -17.01 | 12.94 | 1.89E-01 |
| cg09392658 | -34.34 | 16.47 | 3.71E-02 | -32.91 | 24.78 | 1.84E-01 | 2.67    | 51.25  | 9.58E-01 | -28.82  | 37.14  | 4.38E-01 | -55.84 | 32.43 | 8.51E-02 |
| cg03442425 | 13.48  | 6.47  | 3.71E-02 | 20.43  | 11.64 | 7.94E-02 | 17.77   | 15.87  | 2.63E-01 | 10.12   | 12.68  | 4.25E-01 | 6.02   | 12.56 | 6.32E-01 |

|            |        |       |          |        |       |          |         |        |          |        |       |          |         |       |          |
|------------|--------|-------|----------|--------|-------|----------|---------|--------|----------|--------|-------|----------|---------|-------|----------|
| cg12786907 | -19.06 | 9.15  | 3.71E-02 | -13.13 | 23.39 | 5.75E-01 | -9.70   | 29.17  | 7.39E-01 | -23.01 | 11.12 | 3.84E-02 | -7.32   | 34.08 | 8.30E-01 |
| cg13190531 | -71.40 | 34.25 | 3.71E-02 | -33.87 | 56.29 | 5.47E-01 | -454.67 | 245.26 | 6.38E-02 | -49.36 | 21.74 | 2.32E-02 | -142.45 | 65.98 | 3.08E-02 |
| cg01308118 | 9.43   | 4.52  | 3.71E-02 | 3.46   | 10.11 | 7.32E-01 | 10.32   | 14.91  | 4.89E-01 | 11.57  | 5.89  | 4.92E-02 | 8.09    | 13.19 | 5.40E-01 |
| cg23730558 | -7.38  | 3.54  | 3.71E-02 | -10.14 | 5.17  | 4.99E-02 | -2.27   | 8.10   | 7.79E-01 | -16.39 | 11.67 | 1.60E-01 | -2.75   | 7.11  | 6.99E-01 |
| cg18773129 | 18.66  | 8.95  | 3.71E-02 | 25.73  | 14.87 | 8.36E-02 | 30.87   | 41.18  | 4.54E-01 | 12.41  | 13.01 | 3.40E-01 | 17.10   | 26.15 | 5.13E-01 |
| cg12827530 | 8.96   | 4.30  | 3.71E-02 | 8.87   | 6.67  | 1.84E-01 | 11.42   | 9.01   | 2.05E-01 | 8.61   | 10.96 | 4.32E-01 | 6.67    | 9.53  | 4.84E-01 |
| cg23719209 | -9.49  | 4.55  | 3.71E-02 | -4.61  | 7.35  | 5.31E-01 | -15.52  | 9.82   | 1.14E-01 | -5.17  | 10.97 | 6.37E-01 | -15.21  | 9.49  | 1.09E-01 |
| cg02288684 | -8.87  | 4.26  | 3.71E-02 | -10.66 | 6.93  | 1.24E-01 | -3.95   | 8.85   | 6.55E-01 | -9.80  | 8.99  | 2.76E-01 | -10.43  | 10.42 | 3.17E-01 |
| cg06495347 | 14.48  | 6.95  | 3.71E-02 | 11.21  | 9.55  | 2.40E-01 | 28.03   | 18.75  | 1.35E-01 | 27.03  | 20.39 | 1.85E-01 | 7.18    | 14.92 | 6.30E-01 |
| cg14754555 | 5.60   | 2.68  | 3.71E-02 | 5.21   | 4.07  | 2.01E-01 | 5.06    | 6.41   | 4.30E-01 | 9.47   | 5.31  | 7.46E-02 | 0.19    | 7.32  | 9.80E-01 |
| cg26425305 | 15.42  | 7.40  | 3.71E-02 | 26.68  | 11.73 | 2.30E-02 | 12.60   | 18.14  | 4.87E-01 | 10.80  | 15.49 | 4.85E-01 | 1.21    | 16.23 | 9.41E-01 |
| cg10758875 | -9.24  | 4.44  | 3.71E-02 | -11.91 | 11.38 | 2.95E-01 | -16.38  | 17.01  | 3.35E-01 | -6.56  | 5.37  | 2.21E-01 | -18.98  | 14.25 | 1.83E-01 |
| cg13728650 | 15.91  | 7.63  | 3.71E-02 | -7.44  | 19.87 | 7.08E-01 | 29.56   | 30.34  | 3.30E-01 | 17.53  | 8.93  | 4.97E-02 | 39.67   | 31.49 | 2.08E-01 |
| cg21440776 | 4.39   | 2.10  | 3.71E-02 | 3.41   | 2.77  | 2.18E-01 | 7.24    | 5.24   | 1.67E-01 | 8.93   | 5.54  | 1.07E-01 | -0.33   | 6.17  | 9.58E-01 |
| cg08978588 | 24.72  | 11.86 | 3.72E-02 | 27.11  | 24.59 | 2.70E-01 | 58.16   | 51.29  | 2.57E-01 | 13.53  | 15.19 | 3.73E-01 | 67.50   | 36.67 | 6.57E-02 |
| cg04500730 | 25.95  | 12.45 | 3.72E-02 | 27.71  | 15.65 | 7.67E-02 | 6.68    | 61.07  | 9.13E-01 | 15.26  | 38.72 | 6.94E-01 | 29.52   | 26.40 | 2.64E-01 |
| cg12898595 | 16.96  | 8.14  | 3.72E-02 | 6.80   | 20.77 | 7.43E-01 | 38.47   | 33.58  | 2.52E-01 | 20.78  | 9.64  | 3.11E-02 | -15.47  | 29.74 | 6.03E-01 |
| cg02466440 | 12.33  | 5.92  | 3.72E-02 | 8.53   | 9.52  | 3.70E-01 | 10.40   | 11.19  | 3.53E-01 | 29.17  | 16.11 | 7.03E-02 | 11.01   | 13.24 | 4.06E-01 |
| cg03318469 | 6.69   | 3.21  | 3.72E-02 | 4.79   | 4.17  | 2.51E-01 | 15.74   | 7.75   | 4.23E-02 | 10.84  | 12.56 | 3.88E-01 | 2.63    | 7.76  | 7.35E-01 |
| cg20962444 | 18.26  | 8.76  | 3.72E-02 | 14.81  | 17.36 | 3.94E-01 | 1.29    | 39.74  | 9.74E-01 | 25.11  | 11.34 | 2.69E-02 | -5.53   | 27.66 | 8.41E-01 |
| cg06444781 | 16.94  | 8.13  | 3.72E-02 | 22.98  | 16.41 | 1.61E-01 | -3.25   | 20.78  | 8.76E-01 | 17.33  | 12.29 | 1.59E-01 | 25.66   | 20.04 | 2.00E-01 |
| cg23462788 | -12.29 | 5.90  | 3.72E-02 | -26.52 | 16.09 | 9.94E-02 | 4.71    | 32.91  | 8.86E-01 | -13.31 | 6.85  | 5.21E-02 | 10.54   | 19.36 | 5.86E-01 |
| cg00041014 | -14.47 | 6.94  | 3.72E-02 | -16.15 | 11.44 | 1.58E-01 | -25.96  | 19.01  | 1.72E-01 | -4.11  | 5.10  | 4.20E-01 | -31.88  | 13.55 | 1.87E-02 |
| cg13858611 | 6.36   | 3.05  | 3.72E-02 | 2.80   | 4.39  | 5.23E-01 | 11.01   | 6.95   | 1.13E-01 | 20.35  | 12.52 | 1.04E-01 | 6.33    | 5.93  | 2.86E-01 |
| cg21275283 | 18.12  | 8.70  | 3.72E-02 | 24.21  | 13.56 | 7.42E-02 | 18.76   | 16.97  | 2.69E-01 | 3.53   | 23.10 | 8.78E-01 | 14.85   | 20.27 | 4.64E-01 |
| cg09162148 | 11.34  | 5.44  | 3.72E-02 | 5.44   | 8.98  | 5.44E-01 | 23.93   | 17.26  | 1.65E-01 | 14.55  | 7.77  | 6.12E-02 | -3.78   | 25.99 | 8.84E-01 |
| cg11304234 | 12.31  | 5.91  | 3.72E-02 | 15.00  | 8.16  | 6.58E-02 | 20.24   | 17.35  | 2.44E-01 | 18.03  | 23.14 | 4.36E-01 | 3.11    | 10.90 | 7.75E-01 |
| cg25499461 | -30.83 | 14.79 | 3.72E-02 | -5.70  | 28.20 | 8.40E-01 | -102.23 | 95.49  | 2.84E-01 | -46.75 | 19.45 | 1.62E-02 | 2.07    | 42.36 | 9.61E-01 |
| cg22991943 | 21.38  | 10.26 | 3.72E-02 | 4.97   | 19.27 | 7.97E-01 | 32.47   | 17.70  | 6.65E-02 | 35.17  | 21.10 | 9.56E-02 | 5.17    | 27.02 | 8.48E-01 |
| cg09500317 | 15.85  | 7.60  | 3.72E-02 | 15.75  | 11.58 | 1.74E-01 | 6.01    | 30.54  | 8.44E-01 | 22.62  | 12.00 | 5.95E-02 | -3.79   | 23.42 | 8.71E-01 |
| cg14485787 | 19.70  | 9.45  | 3.72E-02 | 30.10  | 22.19 | 1.75E-01 | 13.58   | 25.96  | 6.01E-01 | 10.80  | 12.31 | 3.81E-01 | 63.04   | 30.47 | 3.86E-02 |
| cg04757411 | -8.87  | 4.26  | 3.72E-02 | -14.00 | 9.32  | 1.33E-01 | -16.65  | 13.02  | 2.01E-01 | -4.74  | 5.74  | 4.09E-01 | -11.60  | 11.59 | 3.17E-01 |
| cg09797433 | 12.03  | 5.78  | 3.72E-02 | 9.94   | 9.78  | 3.10E-01 | -0.63   | 19.18  | 9.74E-01 | 17.65  | 8.59  | 3.99E-02 | 5.96    | 17.54 | 7.34E-01 |
| cg06387980 | 39.12  | 18.78 | 3.72E-02 | 24.49  | 43.85 | 5.77E-01 | 171.78  | 237.87 | 4.70E-01 | 52.92  | 22.33 | 1.78E-02 | -37.16  | 58.38 | 5.24E-01 |
| cg01039763 | 11.75  | 5.64  | 3.72E-02 | 20.97  | 8.47  | 1.33E-02 | 14.49   | 10.87  | 1.82E-01 | 12.91  | 7.51  | 8.56E-02 | -9.42   | 12.17 | 4.39E-01 |

|            |        |       |          |        |       |          |         |        |          |        |       |          |        |       |          |
|------------|--------|-------|----------|--------|-------|----------|---------|--------|----------|--------|-------|----------|--------|-------|----------|
| cg10438589 | 6.42   | 3.08  | 3.72E-02 | 5.85   | 4.18  | 1.61E-01 | 13.63   | 7.93   | 8.55E-02 | 8.15   | 8.19  | 3.20E-01 | 0.15   | 7.60  | 9.85E-01 |
| cg09512322 | -29.62 | 14.22 | 3.72E-02 | -53.29 | 49.53 | 2.82E-01 | -26.90  | 252.67 | 9.15E-01 | -31.72 | 15.39 | 3.93E-02 | 31.73  | 57.64 | 5.82E-01 |
| cg03942932 | 7.68   | 3.69  | 3.72E-02 | 12.61  | 5.96  | 3.43E-02 | 6.24    | 9.11   | 4.93E-01 | 3.76   | 7.40  | 6.12E-01 | 4.38   | 8.12  | 5.90E-01 |
| cg12938320 | -14.38 | 6.90  | 3.72E-02 | -5.27  | 18.86 | 7.80E-01 | -12.96  | 34.80  | 7.10E-01 | -14.83 | 7.98  | 6.31E-02 | -26.47 | 24.71 | 2.84E-01 |
| cg23130849 | -7.21  | 3.46  | 3.72E-02 | -12.83 | 7.36  | 8.13E-02 | 0.96    | 10.68  | 9.29E-01 | -7.16  | 4.72  | 1.29E-01 | -4.58  | 9.33  | 6.24E-01 |
| cg11406780 | 16.66  | 8.00  | 3.72E-02 | 8.78   | 16.60 | 5.97E-01 | 8.31    | 28.64  | 7.72E-01 | 14.50  | 10.46 | 1.66E-01 | 52.31  | 24.67 | 3.40E-02 |
| cg03261004 | 49.78  | 23.90 | 3.72E-02 | 29.57  | 65.00 | 6.49E-01 | 98.71   | 254.43 | 6.98E-01 | 43.67  | 27.61 | 1.14E-01 | 114.12 | 73.08 | 1.18E-01 |
| cg00086334 | 17.47  | 8.39  | 3.72E-02 | 7.92   | 15.78 | 6.16E-01 | 12.88   | 14.08  | 3.60E-01 | 28.93  | 18.23 | 1.12E-01 | 30.10  | 21.60 | 1.63E-01 |
| cg23290121 | 6.30   | 3.02  | 3.72E-02 | 6.16   | 4.28  | 1.51E-01 | 2.41    | 7.03   | 7.31E-01 | 12.38  | 10.03 | 2.17E-01 | 7.34   | 6.35  | 2.48E-01 |
| cg22834281 | -13.13 | 6.30  | 3.72E-02 | -5.65  | 13.35 | 6.72E-01 | 15.29   | 25.11  | 5.43E-01 | -15.44 | 8.06  | 5.55E-02 | -33.18 | 19.71 | 9.24E-02 |
| cg14628819 | 27.41  | 13.16 | 3.72E-02 | 33.65  | 18.16 | 6.39E-02 | -8.14   | 30.28  | 7.88E-01 | 41.03  | 45.75 | 3.70E-01 | 38.76  | 29.17 | 1.84E-01 |
| cg23723194 | -14.31 | 6.87  | 3.72E-02 | -26.10 | 17.51 | 1.36E-01 | -33.98  | 34.22  | 3.21E-01 | -14.15 | 8.10  | 8.06E-02 | 14.65  | 23.42 | 5.31E-01 |
| cg20841156 | -30.80 | 14.78 | 3.72E-02 | -35.14 | 17.58 | 4.56E-02 | -10.09  | 62.45  | 8.72E-01 | -24.18 | 55.11 | 6.61E-01 | -22.08 | 36.43 | 5.44E-01 |
| cg11029346 | -35.54 | 17.06 | 3.72E-02 | 0.30   | 59.39 | 9.96E-01 | -276.46 | 218.43 | 2.06E-01 | -35.63 | 18.57 | 5.50E-02 | -56.85 | 66.09 | 3.90E-01 |
| cg18184935 | 16.93  | 8.13  | 3.73E-02 | 33.47  | 10.41 | 1.31E-03 | 12.67   | 15.04  | 3.99E-01 | 1.85   | 10.78 | 8.63E-01 | 18.46  | 19.72 | 3.49E-01 |
| cg00249383 | 6.75   | 3.24  | 3.73E-02 | 4.73   | 4.38  | 2.81E-01 | 15.40   | 7.32   | 3.54E-02 | 13.16  | 10.31 | 2.02E-01 | -0.94  | 8.13  | 9.08E-01 |
| cg24368876 | -7.18  | 3.45  | 3.73E-02 | -11.60 | 6.22  | 6.20E-02 | -16.14  | 10.03  | 1.07E-01 | -3.23  | 5.12  | 5.29E-01 | -2.01  | 9.87  | 8.39E-01 |
| cg00102093 | 12.05  | 5.78  | 3.73E-02 | 1.61   | 11.90 | 8.92E-01 | 7.59    | 19.97  | 7.04E-01 | 13.77  | 7.68  | 7.30E-02 | 28.60  | 17.24 | 9.72E-02 |
| cg15277658 | 17.78  | 8.53  | 3.73E-02 | 12.96  | 14.19 | 3.61E-01 | -9.09   | 46.97  | 8.47E-01 | 19.96  | 12.44 | 1.09E-01 | 29.73  | 23.29 | 2.02E-01 |
| cg18043104 | 28.65  | 13.75 | 3.73E-02 | 29.97  | 14.72 | 4.18E-02 | 61.20   | 128.20 | 6.33E-01 | 30.37  | 85.49 | 7.22E-01 | 11.13  | 45.95 | 8.09E-01 |
| cg02773671 | -16.67 | 8.01  | 3.73E-02 | -18.21 | 18.61 | 3.28E-01 | -10.02  | 22.02  | 6.49E-01 | -17.84 | 10.68 | 9.48E-02 | -16.19 | 23.07 | 4.83E-01 |
| cg19713565 | 13.78  | 6.62  | 3.73E-02 | 34.59  | 21.01 | 9.97E-02 | 2.44    | 29.66  | 9.35E-01 | 12.14  | 7.41  | 1.01E-01 | 10.16  | 28.78 | 7.24E-01 |
| cg01181350 | 22.99  | 11.04 | 3.73E-02 | 27.13  | 13.18 | 3.95E-02 | 40.57   | 57.32  | 4.79E-01 | 12.62  | 50.49 | 8.03E-01 | 8.65   | 23.89 | 7.17E-01 |
| cg03613618 | 12.85  | 6.17  | 3.73E-02 | 10.64  | 8.67  | 2.20E-01 | 27.44   | 11.53  | 1.73E-02 | 16.96  | 11.89 | 1.54E-01 | -5.32  | 12.89 | 6.80E-01 |
| cg14863667 | 16.86  | 8.10  | 3.73E-02 | 13.06  | 11.55 | 2.58E-01 | 14.55   | 20.44  | 4.77E-01 | 51.29  | 25.30 | 4.26E-02 | 11.67  | 16.20 | 4.71E-01 |
| cg12619400 | -6.07  | 2.92  | 3.73E-02 | -5.43  | 4.80  | 2.58E-01 | -8.33   | 5.90   | 1.58E-01 | -14.08 | 7.61  | 6.45E-02 | 0.11   | 5.94  | 9.86E-01 |
| cg20335179 | 13.60  | 6.53  | 3.73E-02 | 5.12   | 7.65  | 5.04E-01 | 13.32   | 14.40  | 3.55E-01 | 17.43  | 20.89 | 4.04E-01 | 33.75  | 13.64 | 1.33E-02 |
| cg21224380 | 4.88   | 2.34  | 3.73E-02 | 4.09   | 3.39  | 2.28E-01 | 1.46    | 5.83   | 8.02E-01 | 9.45   | 4.58  | 3.90E-02 | 2.19   | 7.47  | 7.70E-01 |
| cg08878263 | 11.07  | 5.31  | 3.73E-02 | 8.69   | 7.78  | 2.64E-01 | 21.48   | 12.54  | 8.67E-02 | 15.19  | 14.40 | 2.91E-01 | 4.98   | 11.40 | 6.62E-01 |
| cg17410660 | -13.38 | 6.42  | 3.73E-02 | -24.79 | 12.07 | 4.00E-02 | 0.41    | 13.58  | 9.76E-01 | -9.10  | 13.09 | 4.87E-01 | -16.87 | 12.79 | 1.87E-01 |
| cg09060789 | 7.84   | 3.77  | 3.73E-02 | 5.44   | 4.70  | 2.47E-01 | 13.32   | 10.40  | 2.00E-01 | 5.88   | 12.47 | 6.37E-01 | 15.30  | 10.24 | 1.35E-01 |
| cg24432048 | -27.46 | 13.18 | 3.73E-02 | -29.46 | 16.58 | 7.55E-02 | -61.62  | 38.76  | 1.12E-01 | -5.13  | 58.58 | 9.30E-01 | -7.12  | 29.40 | 8.09E-01 |
| cg21661815 | -19.80 | 9.51  | 3.73E-02 | -15.96 | 17.16 | 3.52E-01 | -6.42   | 20.71  | 7.57E-01 | -20.29 | 16.98 | 2.32E-01 | -42.64 | 23.16 | 6.56E-02 |
| cg23272632 | 20.22  | 9.71  | 3.73E-02 | 11.69  | 27.10 | 6.66E-01 | 98.40   | 87.44  | 2.60E-01 | 19.49  | 10.92 | 7.44E-02 | 30.44  | 36.89 | 4.09E-01 |
| cg21438382 | 20.22  | 9.71  | 3.73E-02 | 13.70  | 12.35 | 2.67E-01 | 7.83    | 31.53  | 8.04E-01 | 13.49  | 48.69 | 7.82E-01 | 42.29  | 19.50 | 3.01E-02 |

|            |        |       |          |         |       |          |         |        |          |        |       |          |        |       |          |
|------------|--------|-------|----------|---------|-------|----------|---------|--------|----------|--------|-------|----------|--------|-------|----------|
| cg10741308 | -10.65 | 5.11  | 3.73E-02 | -8.63   | 12.09 | 4.75E-01 | -6.54   | 18.71  | 7.27E-01 | -12.60 | 6.51  | 5.30E-02 | -6.54  | 14.19 | 6.45E-01 |
| cg10474368 | -50.64 | 24.32 | 3.73E-02 | -118.63 | 81.32 | 1.45E-01 | -509.46 | 326.78 | 1.19E-01 | -37.24 | 23.65 | 1.15E-01 | -77.56 | 79.39 | 3.29E-01 |
| cg07178968 | 16.46  | 7.90  | 3.73E-02 | 29.55   | 13.00 | 2.30E-02 | 15.06   | 13.22  | 2.54E-01 | 14.54  | 21.99 | 5.08E-01 | -12.03 | 20.86 | 5.64E-01 |
| cg23699098 | 14.98  | 7.19  | 3.73E-02 | 14.78   | 18.29 | 4.19E-01 | 37.31   | 25.27  | 1.40E-01 | 13.99  | 8.50  | 9.98E-02 | -7.21  | 32.73 | 8.26E-01 |
| cg03705299 | 18.28  | 8.78  | 3.73E-02 | -12.78  | 23.33 | 5.84E-01 | -1.87   | 32.10  | 9.53E-01 | 24.71  | 10.38 | 1.73E-02 | 37.35  | 33.49 | 2.65E-01 |
| cg00465970 | 6.97   | 3.35  | 3.73E-02 | 5.06    | 4.46  | 2.57E-01 | 12.71   | 7.32   | 8.24E-02 | 5.29   | 10.11 | 6.00E-01 | 7.47   | 9.72  | 4.42E-01 |
| cg13271430 | -13.63 | 6.55  | 3.73E-02 | -12.95  | 12.99 | 3.19E-01 | -22.15  | 42.89  | 6.05E-01 | -15.13 | 8.16  | 6.38E-02 | -1.17  | 23.26 | 9.60E-01 |
| cg11485154 | 12.48  | 5.99  | 3.73E-02 | 14.40   | 8.43  | 8.76E-02 | 18.76   | 12.68  | 1.39E-01 | 1.66   | 22.01 | 9.40E-01 | 4.50   | 13.49 | 7.39E-01 |
| cg00026141 | -9.98  | 4.79  | 3.73E-02 | -22.70  | 11.09 | 4.06E-02 | 3.47    | 14.52  | 8.11E-01 | -8.91  | 6.11  | 1.45E-01 | -7.16  | 16.05 | 6.55E-01 |
| cg26150621 | 16.44  | 7.89  | 3.73E-02 | 6.27    | 17.53 | 7.20E-01 | 9.24    | 29.59  | 7.55E-01 | 20.26  | 10.05 | 4.38E-02 | 18.41  | 23.93 | 4.42E-01 |
| cg03885343 | -4.70  | 2.26  | 3.73E-02 | -5.76   | 3.85  | 1.35E-01 | -6.44   | 4.73   | 1.74E-01 | -3.91  | 4.66  | 4.02E-01 | -1.74  | 5.11  | 7.34E-01 |
| cg23946364 | 18.91  | 9.08  | 3.73E-02 | 23.03   | 16.64 | 1.67E-01 | 35.43   | 16.06  | 2.74E-02 | -7.35  | 17.99 | 6.83E-01 | 20.25  | 19.59 | 3.01E-01 |
| cg13153808 | 20.68  | 9.93  | 3.73E-02 | 9.92    | 15.46 | 5.21E-01 | 31.74   | 19.66  | 1.07E-01 | -1.81  | 28.14 | 9.49E-01 | 41.96  | 21.79 | 5.42E-02 |
| cg00328227 | -8.94  | 4.29  | 3.73E-02 | -3.98   | 6.32  | 5.29E-01 | -7.45   | 10.69  | 4.86E-01 | -9.46  | 9.47  | 3.18E-01 | -23.20 | 10.41 | 2.58E-02 |
| cg16034060 | -16.22 | 7.79  | 3.73E-02 | -15.32  | 13.28 | 2.49E-01 | 1.95    | 35.69  | 9.56E-01 | -20.40 | 11.39 | 7.34E-02 | -10.68 | 20.74 | 6.07E-01 |
| cg19864002 | 18.62  | 8.94  | 3.73E-02 | 33.59   | 25.26 | 1.84E-01 | 20.53   | 32.22  | 5.24E-01 | 17.80  | 10.41 | 8.73E-02 | -4.91  | 36.33 | 8.92E-01 |
| cg04273661 | 9.14   | 4.39  | 3.73E-02 | 12.14   | 4.83  | 1.20E-02 | -1.22   | 7.65   | 8.73E-01 | 27.89  | 12.97 | 3.16E-02 | 6.66   | 6.77  | 3.26E-01 |
| cg09502339 | 12.18  | 5.85  | 3.73E-02 | 16.30   | 14.14 | 2.49E-01 | 2.87    | 18.43  | 8.76E-01 | 11.28  | 7.44  | 1.30E-01 | 19.33  | 17.61 | 2.72E-01 |
| cg23444305 | 20.92  | 10.05 | 3.74E-02 | 17.56   | 11.84 | 1.38E-01 | 39.15   | 40.21  | 3.30E-01 | -40.72 | 69.65 | 5.59E-01 | 33.97  | 22.66 | 1.34E-01 |
| cg03685063 | 16.38  | 7.87  | 3.74E-02 | -1.14   | 15.92 | 9.43E-01 | 6.19    | 24.99  | 8.04E-01 | 27.01  | 10.74 | 1.19E-02 | 12.93  | 22.76 | 5.70E-01 |
| cg18100008 | -11.64 | 5.59  | 3.74E-02 | -14.84  | 8.63  | 8.57E-02 | -7.80   | 13.23  | 5.56E-01 | -6.09  | 14.40 | 6.73E-01 | -12.36 | 11.15 | 2.68E-01 |
| cg16599698 | 21.13  | 10.15 | 3.74E-02 | 24.67   | 29.53 | 4.04E-01 | 84.33   | 93.40  | 3.67E-01 | 20.99  | 11.34 | 6.40E-02 | 5.63   | 38.97 | 8.85E-01 |
| cg01361499 | 4.60   | 2.21  | 3.74E-02 | 4.19    | 3.10  | 1.76E-01 | 4.76    | 5.09   | 3.50E-01 | 7.57   | 5.17  | 1.43E-01 | 1.56   | 6.40  | 8.07E-01 |
| cg00331852 | 16.33  | 7.84  | 3.74E-02 | 17.83   | 13.56 | 1.89E-01 | 13.96   | 14.11  | 3.23E-01 | 2.47   | 16.11 | 8.78E-01 | 45.77  | 22.70 | 4.37E-02 |
| cg00780909 | -17.29 | 8.31  | 3.74E-02 | -28.77  | 20.77 | 1.66E-01 | -46.08  | 35.81  | 1.98E-01 | -12.59 | 9.87  | 2.02E-01 | -16.55 | 29.68 | 5.77E-01 |
| cg06704469 | -14.91 | 7.16  | 3.74E-02 | -37.27  | 16.09 | 2.05E-02 | -0.09   | 28.65  | 9.97E-01 | -8.35  | 6.59  | 2.05E-01 | -27.11 | 21.16 | 2.00E-01 |
| cg02330706 | 12.72  | 6.11  | 3.74E-02 | 16.64   | 12.95 | 1.99E-01 | 17.01   | 13.62  | 2.12E-01 | 18.55  | 9.72  | 5.64E-02 | -9.55  | 14.35 | 5.05E-01 |
| cg03742950 | 26.74  | 12.85 | 3.74E-02 | 26.85   | 17.90 | 1.34E-01 | 5.20    | 34.30  | 8.79E-01 | 46.35  | 28.86 | 1.08E-01 | 20.49  | 33.59 | 5.42E-01 |
| cg04280969 | 15.93  | 7.65  | 3.74E-02 | 8.23    | 8.83  | 3.51E-01 | 24.39   | 25.84  | 3.45E-01 | 89.78  | 49.46 | 6.95E-02 | 21.66  | 12.37 | 7.99E-02 |
| cg20311846 | 5.86   | 2.81  | 3.74E-02 | 7.02    | 3.72  | 5.92E-02 | 6.65    | 6.19   | 2.82E-01 | -18.22 | 15.90 | 2.52E-01 | 5.46   | 6.46  | 3.98E-01 |
| cg10277268 | 30.90  | 14.85 | 3.74E-02 | 28.05   | 28.81 | 3.30E-01 | -114.06 | 131.81 | 3.87E-01 | 38.22  | 19.95 | 5.54E-02 | 22.23  | 36.23 | 5.40E-01 |
| cg22894329 | 9.50   | 4.57  | 3.74E-02 | 11.30   | 6.84  | 9.86E-02 | 8.76    | 10.67  | 4.12E-01 | 10.54  | 9.82  | 2.83E-01 | 3.79   | 11.57 | 7.43E-01 |
| cg02183025 | 22.02  | 10.58 | 3.74E-02 | 38.81   | 17.22 | 2.43E-02 | -16.84  | 32.91  | 6.09E-01 | 28.32  | 25.13 | 2.60E-01 | 11.98  | 18.08 | 5.08E-01 |
| cg24457403 | -10.58 | 5.08  | 3.74E-02 | -16.71  | 7.76  | 3.14E-02 | -1.38   | 11.65  | 9.06E-01 | -15.17 | 14.94 | 3.10E-01 | -5.28  | 9.88  | 5.93E-01 |
| cg18486698 | 32.88  | 15.80 | 3.74E-02 | 50.83   | 22.45 | 2.36E-02 | -13.13  | 46.23  | 7.76E-01 | 49.75  | 44.41 | 2.63E-01 | 11.29  | 30.90 | 7.15E-01 |



|            |        |       |          |        |       |          |         |        |          |        |       |          |        |       |          |
|------------|--------|-------|----------|--------|-------|----------|---------|--------|----------|--------|-------|----------|--------|-------|----------|
| cg00078221 | 11.86  | 5.70  | 3.74E-02 | 26.94  | 13.56 | 4.70E-02 | 14.72   | 18.44  | 4.25E-01 | 8.40   | 8.21  | 3.06E-01 | 6.71   | 11.51 | 5.60E-01 |
| cg23676151 | 11.69  | 5.62  | 3.74E-02 | 12.78  | 9.06  | 1.58E-01 | -3.52   | 15.81  | 8.24E-01 | 31.94  | 17.73 | 7.17E-02 | 10.33  | 9.02  | 2.52E-01 |
| cg14580211 | 7.71   | 3.70  | 3.74E-02 | 9.09   | 6.38  | 1.54E-01 | 14.98   | 9.53   | 1.16E-01 | 5.48   | 6.02  | 3.62E-01 | 2.26   | 10.17 | 8.24E-01 |
| cg07175290 | 23.12  | 11.11 | 3.74E-02 | 27.78  | 37.02 | 4.53E-01 | -112.02 | 165.78 | 4.99E-01 | 24.39  | 12.01 | 4.22E-02 | 4.90   | 50.04 | 9.22E-01 |
| cg19645639 | -7.57  | 3.64  | 3.74E-02 | -5.47  | 5.48  | 3.19E-01 | -11.43  | 8.44   | 1.76E-01 | -10.46 | 9.47  | 2.69E-01 | -6.60  | 7.64  | 3.88E-01 |
| cg18837932 | 28.69  | 13.79 | 3.74E-02 | -7.79  | 45.39 | 8.64E-01 | 70.16   | 204.19 | 7.31E-01 | 34.83  | 15.01 | 2.03E-02 | -4.79  | 56.49 | 9.32E-01 |
| cg08355568 | 40.91  | 19.66 | 3.74E-02 | 82.90  | 25.67 | 1.24E-03 | -19.70  | 69.26  | 7.76E-01 | 21.20  | 13.32 | 1.11E-01 | 48.22  | 42.90 | 2.61E-01 |
| cg17989313 | 13.42  | 6.45  | 3.74E-02 | 7.36   | 19.32 | 7.03E-01 | -10.86  | 27.44  | 6.92E-01 | 16.27  | 7.28  | 2.55E-02 | 8.97   | 29.10 | 7.58E-01 |
| cg21575295 | 18.61  | 8.94  | 3.74E-02 | 32.89  | 14.63 | 2.45E-02 | 6.05    | 23.32  | 7.95E-01 | 16.31  | 23.47 | 4.87E-01 | 9.15   | 15.49 | 5.54E-01 |
| cg06747907 | 13.38  | 6.43  | 3.74E-02 | 12.05  | 10.14 | 2.35E-01 | 15.02   | 11.45  | 1.90E-01 | 13.45  | 16.29 | 4.09E-01 | 13.39  | 18.01 | 4.57E-01 |
| cg00268009 | 56.78  | 27.29 | 3.74E-02 | 69.05  | 34.64 | 4.62E-02 | 141.02  | 131.52 | 2.84E-01 | 98.02  | 83.60 | 2.41E-01 | -11.27 | 56.93 | 8.43E-01 |
| cg18273412 | 10.05  | 4.83  | 3.74E-02 | 14.90  | 7.49  | 4.66E-02 | 9.29    | 13.46  | 4.90E-01 | 5.53   | 9.65  | 5.67E-01 | 6.20   | 10.68 | 5.61E-01 |
| cg19599410 | -12.78 | 6.14  | 3.74E-02 | -7.08  | 8.57  | 4.09E-01 | -20.45  | 16.65  | 2.19E-01 | -37.46 | 16.93 | 2.69E-02 | -6.58  | 13.01 | 6.13E-01 |
| cg18689253 | 28.08  | 13.50 | 3.74E-02 | 33.35  | 15.83 | 3.51E-02 | 5.85    | 52.59  | 9.11E-01 | 32.12  | 51.59 | 5.34E-01 | 9.04   | 36.22 | 8.03E-01 |
| cg11410882 | -13.52 | 6.50  | 3.74E-02 | -25.50 | 23.20 | 2.72E-01 | -25.75  | 45.01  | 5.67E-01 | -12.46 | 7.04  | 7.69E-02 | -7.69  | 29.20 | 7.92E-01 |
| cg02543470 | -13.68 | 6.58  | 3.74E-02 | -10.87 | 17.44 | 5.33E-01 | -3.73   | 31.30  | 9.05E-01 | -14.78 | 7.64  | 5.31E-02 | -14.08 | 24.32 | 5.63E-01 |
| cg01850245 | -7.74  | 3.72  | 3.75E-02 | -13.15 | 7.14  | 6.56E-02 | -15.21  | 12.40  | 2.20E-01 | -3.34  | 5.38  | 5.35E-01 | -7.51  | 9.27  | 4.18E-01 |
| cg02695677 | -8.58  | 4.12  | 3.75E-02 | 1.89   | 11.41 | 8.69E-01 | -14.79  | 20.37  | 4.68E-01 | -12.03 | 4.90  | 1.40E-02 | 2.60   | 11.94 | 8.28E-01 |
| cg12028816 | 40.21  | 19.33 | 3.75E-02 | 65.08  | 47.58 | 1.71E-01 | -69.01  | 256.06 | 7.88E-01 | 37.25  | 22.53 | 9.82E-02 | 26.31  | 63.21 | 6.77E-01 |
| cg19610370 | -32.35 | 15.55 | 3.75E-02 | -20.66 | 63.18 | 7.44E-01 | -3.08   | 227.93 | 9.89E-01 | -31.28 | 16.65 | 6.03E-02 | -60.36 | 61.81 | 3.29E-01 |
| cg19807716 | -7.85  | 3.77  | 3.75E-02 | -16.57 | 9.71  | 8.78E-02 | 0.04    | 12.82  | 9.97E-01 | -5.63  | 4.59  | 2.21E-01 | -17.84 | 12.79 | 1.63E-01 |
| cg03013636 | -10.54 | 5.07  | 3.75E-02 | -15.77 | 7.59  | 3.78E-02 | -7.63   | 10.15  | 4.52E-01 | -2.25  | 18.57 | 9.03E-01 | -6.27  | 10.53 | 5.51E-01 |
| cg00924484 | 27.41  | 13.17 | 3.75E-02 | 45.55  | 29.82 | 1.27E-01 | 102.06  | 122.56 | 4.05E-01 | 19.68  | 15.82 | 2.14E-01 | 36.92  | 41.63 | 3.75E-01 |
| cg13573928 | 11.18  | 5.37  | 3.75E-02 | 15.46  | 7.86  | 4.92E-02 | 2.33    | 12.99  | 8.57E-01 | 12.00  | 11.83 | 3.10E-01 | 6.95   | 13.65 | 6.10E-01 |
| cg11386757 | 12.77  | 6.14  | 3.75E-02 | 13.51  | 18.20 | 4.58E-01 | 6.01    | 38.96  | 8.77E-01 | 10.14  | 6.84  | 1.38E-01 | 52.22  | 25.99 | 4.45E-02 |
| cg04601143 | 26.51  | 12.74 | 3.75E-02 | 38.02  | 34.87 | 2.76E-01 | 41.56   | 94.66  | 6.61E-01 | 30.02  | 14.58 | 3.94E-02 | -26.98 | 43.99 | 5.40E-01 |
| cg01441127 | 5.06   | 2.43  | 3.75E-02 | 7.41   | 3.71  | 4.61E-02 | 5.09    | 5.07   | 3.15E-01 | 0.10   | 4.67  | 9.82E-01 | 9.67   | 9.12  | 2.89E-01 |
| cg24939470 | 41.12  | 19.76 | 3.75E-02 | 26.50  | 22.90 | 2.47E-01 | 139.22  | 57.90  | 1.62E-02 | 19.73  | 49.32 | 6.89E-01 | 41.19  | 38.72 | 2.87E-01 |
| cg05359465 | 42.17  | 20.27 | 3.75E-02 | 65.93  | 48.28 | 1.72E-01 | -56.84  | 218.26 | 7.95E-01 | 42.04  | 24.25 | 8.30E-02 | 14.28  | 59.41 | 8.10E-01 |
| cg09991633 | -20.98 | 10.08 | 3.75E-02 | -51.21 | 18.52 | 5.68E-03 | -11.82  | 40.82  | 7.72E-01 | -13.48 | 9.15  | 1.41E-01 | -4.53  | 25.76 | 8.60E-01 |
| cg21573745 | 23.11  | 11.11 | 3.75E-02 | 43.41  | 18.77 | 2.07E-02 | 18.90   | 17.32  | 2.75E-01 | 0.12   | 15.15 | 9.93E-01 | 45.99  | 25.06 | 6.65E-02 |
| cg10578701 | -12.72 | 6.11  | 3.75E-02 | -25.95 | 15.54 | 9.48E-02 | 4.08    | 27.52  | 8.82E-01 | -11.24 | 7.35  | 1.26E-01 | -10.79 | 18.94 | 5.69E-01 |
| cg13039512 | 15.79  | 7.59  | 3.75E-02 | 31.93  | 18.63 | 8.66E-02 | 16.73   | 29.75  | 5.74E-01 | 12.45  | 9.12  | 1.73E-01 | 10.26  | 27.29 | 7.07E-01 |
| cg20198923 | -15.28 | 7.34  | 3.75E-02 | -19.57 | 14.14 | 1.66E-01 | -13.02  | 17.90  | 4.67E-01 | -9.69  | 10.82 | 3.71E-01 | -32.96 | 23.05 | 1.53E-01 |
| cg07298299 | 13.39  | 6.44  | 3.75E-02 | 12.77  | 10.72 | 2.33E-01 | 17.67   | 14.45  | 2.22E-01 | 15.25  | 13.14 | 2.46E-01 | 8.06   | 14.36 | 5.75E-01 |

|            |        |       |          |        |       |          |         |        |          |        |       |          |        |       |          |
|------------|--------|-------|----------|--------|-------|----------|---------|--------|----------|--------|-------|----------|--------|-------|----------|
| cg07221635 | 32.56  | 15.65 | 3.75E-02 | 21.00  | 19.39 | 2.79E-01 | -7.03   | 61.92  | 9.10E-01 | 85.89  | 44.38 | 5.30E-02 | 53.94  | 39.08 | 1.68E-01 |
| cg24535130 | 27.00  | 12.98 | 3.75E-02 | 24.14  | 18.43 | 1.90E-01 | 39.42   | 43.69  | 3.67E-01 | 52.86  | 41.87 | 2.07E-01 | 20.23  | 22.97 | 3.78E-01 |
| cg25448856 | 4.30   | 2.07  | 3.75E-02 | 3.41   | 2.95  | 2.47E-01 | 9.55    | 4.85   | 4.89E-02 | 3.01   | 4.29  | 4.83E-01 | 1.98   | 6.79  | 7.71E-01 |
| cg27315239 | 7.40   | 3.56  | 3.75E-02 | 0.35   | 6.56  | 9.57E-01 | 9.50    | 7.71   | 2.18E-01 | 11.48  | 5.50  | 3.70E-02 | 6.42   | 13.02 | 6.22E-01 |
| cg25246012 | -37.22 | 17.89 | 3.75E-02 | -44.06 | 22.27 | 4.79E-02 | 52.02   | 73.90  | 4.81E-01 | 33.08  | 69.65 | 6.35E-01 | -61.01 | 37.35 | 1.02E-01 |
| cg12359809 | -6.76  | 3.25  | 3.75E-02 | -8.36  | 4.84  | 8.46E-02 | -5.19   | 8.88   | 5.59E-01 | -1.47  | 7.69  | 8.49E-01 | -8.61  | 6.67  | 1.97E-01 |
| cg23296572 | 18.36  | 8.83  | 3.75E-02 | 9.33   | 15.18 | 5.39E-01 | 6.59    | 15.69  | 6.74E-01 | 37.30  | 19.70 | 5.83E-02 | 38.92  | 23.19 | 9.34E-02 |
| cg02743713 | 13.02  | 6.26  | 3.75E-02 | 12.41  | 10.10 | 2.19E-01 | 6.98    | 18.38  | 7.04E-01 | 28.11  | 21.12 | 1.83E-01 | 12.08  | 9.75  | 2.16E-01 |
| cg16815882 | 7.39   | 3.56  | 3.75E-02 | 6.03   | 4.51  | 1.81E-01 | 17.33   | 9.31   | 6.27E-02 | 2.93   | 10.02 | 7.70E-01 | 7.04   | 10.90 | 5.19E-01 |
| cg10892587 | -41.10 | 19.76 | 3.75E-02 | -52.17 | 25.86 | 4.36E-02 | 0.68    | 72.38  | 9.93E-01 | 46.52  | 71.00 | 5.12E-01 | -54.12 | 38.46 | 1.59E-01 |
| cg21966764 | -7.00  | 3.36  | 3.75E-02 | -6.56  | 6.27  | 2.95E-01 | -18.23  | 11.14  | 1.02E-01 | -5.05  | 4.86  | 2.99E-01 | -7.26  | 8.95  | 4.17E-01 |
| cg07545037 | 9.22   | 4.43  | 3.75E-02 | 5.54   | 5.36  | 3.02E-01 | 10.18   | 7.91   | 1.98E-01 | 25.43  | 9.37  | 6.63E-03 | 1.83   | 7.83  | 8.15E-01 |
| cg02116942 | -15.41 | 7.41  | 3.75E-02 | -18.05 | 21.14 | 3.93E-01 | -4.00   | 32.89  | 9.03E-01 | -13.63 | 8.48  | 1.08E-01 | -41.04 | 29.51 | 1.64E-01 |
| cg10726312 | 10.50  | 5.05  | 3.75E-02 | 10.34  | 8.92  | 2.46E-01 | 13.49   | 19.19  | 4.82E-01 | 9.69   | 7.15  | 1.75E-01 | 12.69  | 15.05 | 3.99E-01 |
| cg02520639 | -6.77  | 3.25  | 3.75E-02 | -7.63  | 4.41  | 8.35E-02 | -2.58   | 6.58   | 6.95E-01 | -22.18 | 13.67 | 1.05E-01 | -4.69  | 8.30  | 5.72E-01 |
| cg24884084 | -8.73  | 4.20  | 3.75E-02 | -15.16 | 6.40  | 1.79E-02 | -4.91   | 10.28  | 6.33E-01 | 0.83   | 10.22 | 9.36E-01 | -6.54  | 8.65  | 4.50E-01 |
| cg03578662 | 23.28  | 11.19 | 3.76E-02 | 30.27  | 14.02 | 3.08E-02 | 0.49    | 35.44  | 9.89E-01 | 12.95  | 33.20 | 6.97E-01 | 16.50  | 28.95 | 5.69E-01 |
| cg14853265 | 13.88  | 6.67  | 3.76E-02 | -7.84  | 16.23 | 6.29E-01 | 13.27   | 43.04  | 7.58E-01 | 20.53  | 7.78  | 8.35E-03 | -2.98  | 25.01 | 9.05E-01 |
| cg01687997 | 16.17  | 7.78  | 3.76E-02 | 27.77  | 12.92 | 3.15E-02 | 22.40   | 18.15  | 2.17E-01 | 4.72   | 13.54 | 7.27E-01 | 3.50   | 22.10 | 8.74E-01 |
| cg01432609 | 7.17   | 3.45  | 3.76E-02 | 8.34   | 4.30  | 5.24E-02 | 13.47   | 10.13  | 1.84E-01 | -9.51  | 11.56 | 4.11E-01 | 7.21   | 8.88  | 4.17E-01 |
| cg12112870 | -8.11  | 3.90  | 3.76E-02 | -0.67  | 6.81  | 9.22E-01 | -14.35  | 7.68   | 6.18E-02 | -8.13  | 7.22  | 2.60E-01 | -14.85 | 11.14 | 1.83E-01 |
| cg16687344 | -23.31 | 11.21 | 3.76E-02 | -30.90 | 13.08 | 1.82E-02 | 4.78    | 19.23  | 8.04E-01 | -51.24 | 19.17 | 7.50E-03 | -11.38 | 19.58 | 5.61E-01 |
| cg06806891 | 8.25   | 3.97  | 3.76E-02 | 5.80   | 4.72  | 2.19E-01 | 23.22   | 10.91  | 3.33E-02 | 5.27   | 16.93 | 7.56E-01 | 7.46   | 12.14 | 5.39E-01 |
| cg04708321 | 17.30  | 8.32  | 3.76E-02 | 33.32  | 14.63 | 2.27E-02 | 21.48   | 15.40  | 1.63E-01 | -4.15  | 16.27 | 7.99E-01 | 12.16  | 21.64 | 5.74E-01 |
| cg10051414 | 41.41  | 19.92 | 3.76E-02 | 19.59  | 19.93 | 3.26E-01 | -6.94   | 55.45  | 9.00E-01 | 82.87  | 59.98 | 1.67E-01 | 78.85  | 28.75 | 6.09E-03 |
| cg00281837 | 7.32   | 3.52  | 3.76E-02 | 9.23   | 4.09  | 2.42E-02 | 1.79    | 6.97   | 7.97E-01 | 25.21  | 11.82 | 3.29E-02 | 2.48   | 6.33  | 6.96E-01 |
| cg02299940 | 17.88  | 8.60  | 3.76E-02 | 20.38  | 13.54 | 1.32E-01 | 54.88   | 28.58  | 5.48E-02 | 16.18  | 25.34 | 5.23E-01 | 7.23   | 13.76 | 5.99E-01 |
| cg14991695 | -39.93 | 19.20 | 3.76E-02 | -85.51 | 53.51 | 1.10E-01 | -228.31 | 295.11 | 4.39E-01 | -26.38 | 21.53 | 2.21E-01 | -97.39 | 71.79 | 1.75E-01 |
| cg22862961 | 13.93  | 6.70  | 3.76E-02 | -8.95  | 17.37 | 6.07E-01 | 24.16   | 21.67  | 2.65E-01 | 18.09  | 8.14  | 2.63E-02 | 8.98   | 24.01 | 7.08E-01 |
| cg02083676 | 7.38   | 3.55  | 3.76E-02 | 4.97   | 4.51  | 2.71E-01 | 10.66   | 8.22   | 1.95E-01 | 14.42  | 14.21 | 3.10E-01 | 10.83  | 9.82  | 2.70E-01 |
| cg12804104 | -14.28 | 6.87  | 3.76E-02 | -8.99  | 18.84 | 6.33E-01 | 16.30   | 25.38  | 5.21E-01 | -15.33 | 8.11  | 5.89E-02 | -42.62 | 24.69 | 8.44E-02 |
| cg26394257 | 9.24   | 4.44  | 3.76E-02 | 9.46   | 6.69  | 1.57E-01 | 20.14   | 11.09  | 6.93E-02 | 15.02  | 13.24 | 2.57E-01 | 0.51   | 8.30  | 9.51E-01 |
| cg18131932 | -15.94 | 7.66  | 3.76E-02 | -24.91 | 12.79 | 5.15E-02 | -11.46  | 16.36  | 4.84E-01 | -15.44 | 16.63 | 3.53E-01 | -5.72  | 16.77 | 7.33E-01 |
| cg05607271 | 29.75  | 14.31 | 3.76E-02 | 30.43  | 19.11 | 1.11E-01 | 42.54   | 44.44  | 3.38E-01 | 34.33  | 42.91 | 4.24E-01 | 19.87  | 30.20 | 5.11E-01 |
| cg11257300 | -12.43 | 5.98  | 3.76E-02 | -11.26 | 12.45 | 3.66E-01 | -13.78  | 19.37  | 4.77E-01 | -13.52 | 8.04  | 9.26E-02 | -8.61  | 17.18 | 6.16E-01 |

|            |        |       |          |        |       |          |        |       |          |        |       |          |        |       |          |
|------------|--------|-------|----------|--------|-------|----------|--------|-------|----------|--------|-------|----------|--------|-------|----------|
| cg02044161 | 14.46  | 6.96  | 3.76E-02 | 28.71  | 21.54 | 1.83E-01 | 5.34   | 25.93 | 8.37E-01 | 15.61  | 7.93  | 4.90E-02 | -17.40 | 30.01 | 5.62E-01 |
| cg18297960 | -7.49  | 3.60  | 3.76E-02 | -9.94  | 5.45  | 6.79E-02 | -8.04  | 8.45  | 3.41E-01 | -5.80  | 9.88  | 5.57E-01 | -3.66  | 7.25  | 6.14E-01 |
| cg18091465 | -9.26  | 4.45  | 3.76E-02 | -15.27 | 7.12  | 3.21E-02 | 3.30   | 9.41  | 7.26E-01 | -8.10  | 13.37 | 5.45E-01 | -11.42 | 8.51  | 1.79E-01 |
| cg18987690 | -29.67 | 14.27 | 3.76E-02 | -39.38 | 21.96 | 7.29E-02 | -67.41 | 68.18 | 3.23E-01 | -9.21  | 7.91  | 2.44E-01 | -57.26 | 23.70 | 1.57E-02 |
| cg07211239 | 13.33  | 6.41  | 3.76E-02 | 17.15  | 8.83  | 5.21E-02 | 13.73  | 13.53 | 3.10E-01 | -1.60  | 22.49 | 9.43E-01 | 8.00   | 15.72 | 6.11E-01 |
| cg27502580 | -11.71 | 5.63  | 3.76E-02 | -19.57 | 13.00 | 1.32E-01 | 8.05   | 23.98 | 7.37E-01 | -9.15  | 7.30  | 2.10E-01 | -18.74 | 13.99 | 1.80E-01 |
| cg03117079 | 14.36  | 6.91  | 3.76E-02 | 12.72  | 9.45  | 1.78E-01 | 25.25  | 18.16 | 1.64E-01 | 29.40  | 18.75 | 1.17E-01 | -0.39  | 16.01 | 9.81E-01 |
| cg01309081 | -13.47 | 6.48  | 3.76E-02 | -10.96 | 10.74 | 3.08E-01 | 0.11   | 11.49 | 9.92E-01 | -30.74 | 14.49 | 3.39E-02 | -21.97 | 14.81 | 1.38E-01 |
| cg02149740 | 9.18   | 4.42  | 3.76E-02 | 6.88   | 9.08  | 4.48E-01 | -10.38 | 19.37 | 5.92E-01 | 11.13  | 5.49  | 4.25E-02 | 13.83  | 17.51 | 4.30E-01 |
| cg05325193 | 16.60  | 7.99  | 3.76E-02 | 7.47   | 9.47  | 4.30E-01 | 8.80   | 25.96 | 7.35E-01 | 26.62  | 29.34 | 3.64E-01 | 39.05  | 15.70 | 1.29E-02 |
| cg10052782 | -11.40 | 5.48  | 3.76E-02 | -22.89 | 12.50 | 6.72E-02 | -16.63 | 20.05 | 4.07E-01 | -8.92  | 7.02  | 2.04E-01 | -2.56  | 15.61 | 8.70E-01 |
| cg00223245 | -7.84  | 3.77  | 3.76E-02 | -13.76 | 6.84  | 4.42E-02 | -14.18 | 9.92  | 1.53E-01 | -3.13  | 6.21  | 6.14E-01 | -2.47  | 8.80  | 7.79E-01 |
| cg08248461 | 20.72  | 9.97  | 3.76E-02 | 24.83  | 18.80 | 1.87E-01 | -2.90  | 20.21 | 8.86E-01 | 16.85  | 10.51 | 1.09E-01 | 60.11  | 24.78 | 1.53E-02 |
| cg10673140 | 43.74  | 21.04 | 3.76E-02 | 16.44  | 15.24 | 2.81E-01 | 7.23   | 96.94 | 9.41E-01 | 98.79  | 49.09 | 4.42E-02 | 70.49  | 30.11 | 1.92E-02 |
| cg15312943 | 5.64   | 2.71  | 3.76E-02 | 5.06   | 3.55  | 1.53E-01 | 9.87   | 7.59  | 1.94E-01 | 5.54   | 7.21  | 4.42E-01 | 4.32   | 7.09  | 5.42E-01 |
| cg19621628 | 19.19  | 9.23  | 3.76E-02 | 39.46  | 15.67 | 1.18E-02 | 15.41  | 38.39 | 6.88E-01 | 17.72  | 8.41  | 3.51E-02 | -17.40 | 25.49 | 4.95E-01 |
| cg11976193 | 17.06  | 8.21  | 3.77E-02 | 31.94  | 17.61 | 6.97E-02 | 27.91  | 18.91 | 1.40E-01 | 22.66  | 19.06 | 2.35E-01 | 1.62   | 12.83 | 9.00E-01 |
| cg06157570 | 21.76  | 10.47 | 3.77E-02 | 7.23   | 17.00 | 6.71E-01 | 40.28  | 20.80 | 5.28E-02 | 37.27  | 22.37 | 9.57E-02 | 4.40   | 27.19 | 8.72E-01 |
| cg00894134 | -11.06 | 5.32  | 3.77E-02 | -17.84 | 8.94  | 4.60E-02 | -10.14 | 11.85 | 3.92E-01 | -9.12  | 12.39 | 4.62E-01 | -3.90  | 10.46 | 7.09E-01 |
| cg20936443 | 13.65  | 6.57  | 3.77E-02 | 12.43  | 14.62 | 3.95E-01 | -22.04 | 26.86 | 4.12E-01 | 15.87  | 8.16  | 5.18E-02 | 24.04  | 21.79 | 2.70E-01 |
| cg05645404 | -12.75 | 6.13  | 3.77E-02 | -15.14 | 19.82 | 4.45E-01 | 6.88   | 87.52 | 9.37E-01 | -11.91 | 6.65  | 7.31E-02 | -24.79 | 27.99 | 3.76E-01 |
| cg03884132 | 28.28  | 13.61 | 3.77E-02 | 20.19  | 16.93 | 2.33E-01 | 60.99  | 46.30 | 1.88E-01 | 12.19  | 71.96 | 8.65E-01 | 41.12  | 28.26 | 1.46E-01 |
| cg06358608 | 9.71   | 4.67  | 3.77E-02 | 10.30  | 5.80  | 7.56E-02 | 33.36  | 23.77 | 1.60E-01 | 12.33  | 22.02 | 5.76E-01 | 4.41   | 9.05  | 6.26E-01 |
| cg15918259 | 10.06  | 4.84  | 3.77E-02 | 7.22   | 7.13  | 3.11E-01 | 13.95  | 12.69 | 2.71E-01 | 12.05  | 10.30 | 2.42E-01 | 11.80  | 11.62 | 3.10E-01 |
| cg00672332 | 15.55  | 7.48  | 3.77E-02 | 15.52  | 11.46 | 1.76E-01 | 23.33  | 14.30 | 1.03E-01 | -9.54  | 23.43 | 6.84E-01 | 17.80  | 16.83 | 2.90E-01 |
| cg26059287 | 14.60  | 7.02  | 3.77E-02 | 7.99   | 11.05 | 4.70E-01 | 21.39  | 12.23 | 8.04E-02 | 20.95  | 21.75 | 3.36E-01 | 13.17  | 17.45 | 4.50E-01 |
| cg16182691 | -13.53 | 6.51  | 3.77E-02 | -34.77 | 18.00 | 5.34E-02 | 1.63   | 20.85 | 9.38E-01 | -12.31 | 7.78  | 1.14E-01 | -7.32  | 24.42 | 7.64E-01 |
| cg03002428 | 25.92  | 12.47 | 3.77E-02 | 23.75  | 14.02 | 9.03E-02 | 77.57  | 94.61 | 4.12E-01 | 64.60  | 73.47 | 3.79E-01 | 24.13  | 30.97 | 4.36E-01 |
| cg02821998 | 16.47  | 7.93  | 3.77E-02 | 31.83  | 12.60 | 1.15E-02 | 4.19   | 15.31 | 7.84E-01 | 1.09   | 16.31 | 9.47E-01 | 23.02  | 20.72 | 2.66E-01 |
| cg17917325 | 9.99   | 4.80  | 3.77E-02 | 13.08  | 6.78  | 5.36E-02 | 13.72  | 11.52 | 2.34E-01 | 0.24   | 13.42 | 9.85E-01 | 5.09   | 10.88 | 6.40E-01 |
| cg19306380 | 42.82  | 20.60 | 3.77E-02 | 38.55  | 26.23 | 1.42E-01 | -34.80 | 81.84 | 6.71E-01 | -23.27 | 69.33 | 7.37E-01 | 83.32  | 35.12 | 1.77E-02 |
| cg06635059 | -7.02  | 3.38  | 3.77E-02 | 0.31   | 5.92  | 9.58E-01 | -1.17  | 9.11  | 8.98E-01 | -11.72 | 4.31  | 6.51E-03 | -11.84 | 9.31  | 2.03E-01 |
| cg02459569 | 9.88   | 4.76  | 3.77E-02 | 6.32   | 6.22  | 3.10E-01 | 26.67  | 11.52 | 2.06E-02 | 5.60   | 16.25 | 7.30E-01 | 7.31   | 11.90 | 5.39E-01 |
| cg14870383 | -38.56 | 18.55 | 3.77E-02 | -40.18 | 24.05 | 9.47E-02 | 2.94   | 61.86 | 9.62E-01 | -30.87 | 58.32 | 5.97E-01 | -55.19 | 40.17 | 1.69E-01 |
| cg07546943 | -8.77  | 4.22  | 3.77E-02 | -7.83  | 5.33  | 1.42E-01 | -14.17 | 12.24 | 2.47E-01 | 6.27   | 12.38 | 6.13E-01 | -21.10 | 11.37 | 6.35E-02 |

|            |        |       |          |        |       |          |        |        |          |        |       |          |        |       |          |
|------------|--------|-------|----------|--------|-------|----------|--------|--------|----------|--------|-------|----------|--------|-------|----------|
| cg14334161 | 9.38   | 4.51  | 3.77E-02 | 7.01   | 6.65  | 2.91E-01 | 13.46  | 10.23  | 1.88E-01 | 11.10  | 12.68 | 3.81E-01 | 9.76   | 9.69  | 3.14E-01 |
| cg26835419 | -15.51 | 7.46  | 3.77E-02 | -23.98 | 14.48 | 9.77E-02 | 0.61   | 18.64  | 9.74E-01 | -14.74 | 11.83 | 2.13E-01 | -19.14 | 17.80 | 2.82E-01 |
| cg14523259 | -13.56 | 6.53  | 3.77E-02 | -29.24 | 14.60 | 4.52E-02 | -33.61 | 20.49  | 1.01E-01 | -5.62  | 7.99  | 4.82E-01 | -10.94 | 19.23 | 5.69E-01 |
| cg00663000 | -16.45 | 7.92  | 3.77E-02 | -16.75 | 12.57 | 1.83E-01 | -58.45 | 39.80  | 1.42E-01 | -21.38 | 9.04  | 1.80E-02 | 12.42  | 19.73 | 5.29E-01 |
| cg23998071 | 7.21   | 3.47  | 3.77E-02 | 3.97   | 4.78  | 4.06E-01 | 17.17  | 10.78  | 1.11E-01 | -1.35  | 20.87 | 9.49E-01 | 9.87   | 5.93  | 9.61E-02 |
| cg10524582 | -6.19  | 2.98  | 3.77E-02 | -11.49 | 5.43  | 3.45E-02 | -1.46  | 6.04   | 8.10E-01 | -5.72  | 5.78  | 3.22E-01 | -4.52  | 6.80  | 5.07E-01 |
| cg14737332 | 12.76  | 6.14  | 3.77E-02 | 10.60  | 12.66 | 4.03E-01 | 74.45  | 41.46  | 7.25E-02 | 9.32   | 6.82  | 1.72E-01 | 29.28  | 20.55 | 1.54E-01 |
| cg16292343 | 13.13  | 6.32  | 3.77E-02 | 20.65  | 8.57  | 1.60E-02 | -3.03  | 14.51  | 8.34E-01 | 8.39   | 18.44 | 6.49E-01 | 10.03  | 16.32 | 5.39E-01 |
| cg05366024 | -10.69 | 5.15  | 3.77E-02 | -15.39 | 10.89 | 1.58E-01 | -10.44 | 14.63  | 4.75E-01 | -9.02  | 7.13  | 2.06E-01 | -9.60  | 14.13 | 4.97E-01 |
| cg08036850 | -33.09 | 15.93 | 3.77E-02 | -79.95 | 45.41 | 7.83E-02 | 165.71 | 216.55 | 4.44E-01 | -29.40 | 17.89 | 1.00E-01 | -10.88 | 56.46 | 8.47E-01 |
| cg20150017 | 17.64  | 8.49  | 3.77E-02 | 48.37  | 21.43 | 2.40E-02 | 11.49  | 38.81  | 7.67E-01 | 12.26  | 11.10 | 2.69E-01 | 11.08  | 18.53 | 5.50E-01 |
| cg17670477 | 14.70  | 7.07  | 3.77E-02 | 10.82  | 8.34  | 1.94E-01 | -7.58  | 43.33  | 8.61E-01 | 29.57  | 16.09 | 6.61E-02 | 23.26  | 28.94 | 4.22E-01 |
| cg07704672 | 56.66  | 27.27 | 3.77E-02 | 57.10  | 36.71 | 1.20E-01 | -9.86  | 85.62  | 9.08E-01 | 53.67  | 74.16 | 4.69E-01 | 89.29  | 59.28 | 1.32E-01 |
| cg03727433 | 14.70  | 7.07  | 3.77E-02 | 23.76  | 17.50 | 1.75E-01 | 27.31  | 29.57  | 3.56E-01 | 11.62  | 8.41  | 1.67E-01 | 14.38  | 26.29 | 5.84E-01 |
| cg06372015 | 19.18  | 9.23  | 3.77E-02 | 23.11  | 12.10 | 5.62E-02 | 50.98  | 38.98  | 1.91E-01 | 17.22  | 51.26 | 7.37E-01 | 7.04   | 16.06 | 6.61E-01 |
| cg13782781 | 16.53  | 7.95  | 3.77E-02 | 7.93   | 19.20 | 6.79E-01 | -42.22 | 71.31  | 5.54E-01 | 17.08  | 9.16  | 6.20E-02 | 45.79  | 32.21 | 1.55E-01 |
| cg21750233 | 14.22  | 6.84  | 3.77E-02 | 18.18  | 15.14 | 2.30E-01 | 13.92  | 20.55  | 4.98E-01 | 14.31  | 9.02  | 1.13E-01 | 6.67   | 20.69 | 7.47E-01 |
| cg15395461 | 17.17  | 8.27  | 3.78E-02 | 7.87   | 19.46 | 6.86E-01 | 44.72  | 34.97  | 2.01E-01 | 18.83  | 10.14 | 6.31E-02 | 7.35   | 26.36 | 7.80E-01 |
| cg25407528 | 29.44  | 14.17 | 3.78E-02 | 50.37  | 22.56 | 2.56E-02 | 41.79  | 26.64  | 1.17E-01 | 5.65   | 9.40  | 5.48E-01 | 50.23  | 30.16 | 9.58E-02 |
| cg09093212 | -16.25 | 7.82  | 3.78E-02 | -16.54 | 17.17 | 3.35E-01 | -21.20 | 37.50  | 5.72E-01 | -16.72 | 9.90  | 9.14E-02 | -11.72 | 22.16 | 5.97E-01 |
| cg20400248 | 11.26  | 5.42  | 3.78E-02 | 4.78   | 12.99 | 7.13E-01 | 30.01  | 20.22  | 1.38E-01 | 10.10  | 6.50  | 1.20E-01 | 21.21  | 22.29 | 3.41E-01 |
| cg11608005 | -12.12 | 5.83  | 3.78E-02 | -6.66  | 14.06 | 6.36E-01 | 31.68  | 37.39  | 3.97E-01 | -14.86 | 6.85  | 2.99E-02 | -12.31 | 21.03 | 5.58E-01 |
| cg27266250 | -47.11 | 22.68 | 3.78E-02 | -76.31 | 30.21 | 1.15E-02 | -26.23 | 80.77  | 7.45E-01 | -13.86 | 50.95 | 7.86E-01 | 4.38   | 56.78 | 9.39E-01 |
| cg03177042 | 10.84  | 5.22  | 3.78E-02 | 8.20   | 9.03  | 3.64E-01 | 9.45   | 19.44  | 6.27E-01 | 12.86  | 8.74  | 1.41E-01 | 11.92  | 10.70 | 2.65E-01 |
| cg04087740 | 6.79   | 3.27  | 3.78E-02 | 4.95   | 5.08  | 3.30E-01 | 12.22  | 6.81   | 7.26E-02 | 9.27   | 9.07  | 3.07E-01 | 3.19   | 6.87  | 6.42E-01 |
| cg06522915 | 14.33  | 6.90  | 3.78E-02 | 0.84   | 17.75 | 9.62E-01 | 11.29  | 40.21  | 7.79E-01 | 18.85  | 7.95  | 1.78E-02 | -4.75  | 26.73 | 8.59E-01 |
| cg07900444 | -8.42  | 4.05  | 3.78E-02 | -13.32 | 5.41  | 1.38E-02 | -8.08  | 10.27  | 4.32E-01 | 2.70   | 11.75 | 8.18E-01 | -0.03  | 10.01 | 9.98E-01 |
| cg09793883 | 13.77  | 6.63  | 3.78E-02 | 13.63  | 9.45  | 1.49E-01 | 7.12   | 16.44  | 6.65E-01 | 15.32  | 19.57 | 4.34E-01 | 17.99  | 13.80 | 1.92E-01 |
| cg19627034 | 7.82   | 3.76  | 3.78E-02 | 3.01   | 4.91  | 5.40E-01 | 18.84  | 10.30  | 6.75E-02 | 11.97  | 11.08 | 2.80E-01 | 13.26  | 9.34  | 1.56E-01 |
| cg11435441 | -7.19  | 3.46  | 3.78E-02 | -7.20  | 4.72  | 1.27E-01 | -5.42  | 8.97   | 5.46E-01 | -16.73 | 10.27 | 1.03E-01 | -3.04  | 7.75  | 6.94E-01 |
| cg19020855 | 12.70  | 6.12  | 3.78E-02 | 2.62   | 16.93 | 8.77E-01 | -2.82  | 27.27  | 9.18E-01 | 15.55  | 7.06  | 2.76E-02 | 12.11  | 23.33 | 6.04E-01 |
| cg07959747 | -17.91 | 8.62  | 3.78E-02 | -10.30 | 18.27 | 5.73E-01 | -74.79 | 36.50  | 4.05E-02 | -15.41 | 11.08 | 1.64E-01 | -18.20 | 25.34 | 4.73E-01 |
| cg00857137 | 10.66  | 5.13  | 3.78E-02 | 5.46   | 8.42  | 5.17E-01 | 10.15  | 11.63  | 3.83E-01 | 17.22  | 10.20 | 9.14E-02 | 12.70  | 12.08 | 2.93E-01 |
| cg02827132 | -40.29 | 19.40 | 3.78E-02 | -30.49 | 25.69 | 2.35E-01 | -51.05 | 97.38  | 6.00E-01 | -63.74 | 42.08 | 1.30E-01 | -41.26 | 46.01 | 3.70E-01 |
| cg14738823 | 10.89  | 5.24  | 3.78E-02 | 8.40   | 8.50  | 3.23E-01 | 19.93  | 11.50  | 8.31E-02 | -0.60  | 11.72 | 9.59E-01 | 17.41  | 11.43 | 1.28E-01 |

|            |        |       |          |        |       |          |         |        |          |        |       |          |         |       |          |
|------------|--------|-------|----------|--------|-------|----------|---------|--------|----------|--------|-------|----------|---------|-------|----------|
| cg04215126 | -11.98 | 5.77  | 3.78E-02 | -14.27 | 9.20  | 1.21E-01 | -20.95  | 15.90  | 1.88E-01 | -7.17  | 12.99 | 5.81E-01 | -7.91   | 10.96 | 4.71E-01 |
| cg09219171 | 25.80  | 12.42 | 3.78E-02 | 29.82  | 15.64 | 5.66E-02 | 3.35    | 40.74  | 9.34E-01 | 7.09   | 62.21 | 9.09E-01 | 27.09   | 25.58 | 2.90E-01 |
| cg01393945 | 6.09   | 2.93  | 3.78E-02 | 8.49   | 4.07  | 3.68E-02 | 6.41    | 6.27   | 3.07E-01 | 2.42   | 9.20  | 7.93E-01 | 0.18    | 7.32  | 9.80E-01 |
| cg16792969 | 15.42  | 7.42  | 3.78E-02 | 13.23  | 23.09 | 5.67E-01 | 37.74   | 34.61  | 2.76E-01 | 11.31  | 8.53  | 1.85E-01 | 40.38   | 24.37 | 9.75E-02 |
| cg16029623 | -7.41  | 3.57  | 3.78E-02 | -10.17 | 6.25  | 1.04E-01 | -2.16   | 8.91   | 8.09E-01 | -6.24  | 5.69  | 2.72E-01 | -10.68  | 10.22 | 2.96E-01 |
| cg15935791 | 14.44  | 6.95  | 3.78E-02 | 15.37  | 10.85 | 1.57E-01 | 10.00   | 16.87  | 5.54E-01 | 33.84  | 21.25 | 1.11E-01 | 9.00    | 12.44 | 4.70E-01 |
| cg12084124 | 50.34  | 24.24 | 3.78E-02 | 62.52  | 31.08 | 4.43E-02 | -9.07   | 128.48 | 9.44E-01 | 104.68 | 62.08 | 9.18E-02 | -16.30  | 53.71 | 7.62E-01 |
| cg17382888 | 16.70  | 8.04  | 3.78E-02 | 11.37  | 14.99 | 4.48E-01 | 33.42   | 23.73  | 1.59E-01 | 18.35  | 11.08 | 9.77E-02 | -1.02   | 30.19 | 9.73E-01 |
| cg19562707 | 12.13  | 5.84  | 3.78E-02 | 14.38  | 9.04  | 1.12E-01 | 9.49    | 11.61  | 4.14E-01 | 23.65  | 18.19 | 1.94E-01 | 5.70    | 12.29 | 6.42E-01 |
| cg06485603 | 13.27  | 6.39  | 3.78E-02 | 19.36  | 8.01  | 1.56E-02 | 16.29   | 19.68  | 4.08E-01 | 12.10  | 23.31 | 6.04E-01 | -9.18   | 14.93 | 5.39E-01 |
| cg18934187 | 4.68   | 2.25  | 3.78E-02 | 4.46   | 3.31  | 1.78E-01 | 6.58    | 6.71   | 3.27E-01 | 4.89   | 3.91  | 2.11E-01 | 2.72    | 7.43  | 7.14E-01 |
| cg25079915 | 6.84   | 3.29  | 3.78E-02 | 10.01  | 4.39  | 2.27E-02 | 6.98    | 9.75   | 4.74E-01 | 5.05   | 7.90  | 5.23E-01 | -3.08   | 8.51  | 7.17E-01 |
| cg05705096 | 16.81  | 8.09  | 3.78E-02 | 1.89   | 16.92 | 9.11E-01 | 26.43   | 14.40  | 6.64E-02 | 14.40  | 13.93 | 3.01E-01 | 26.94   | 23.64 | 2.54E-01 |
| cg10614445 | 18.93  | 9.12  | 3.78E-02 | 37.48  | 16.97 | 2.72E-02 | 14.50   | 19.29  | 4.52E-01 | 22.95  | 13.59 | 9.12E-02 | -10.87  | 20.69 | 5.99E-01 |
| cg14367020 | 11.51  | 5.54  | 3.78E-02 | 23.47  | 13.97 | 9.30E-02 | 9.02    | 23.42  | 7.00E-01 | 9.88   | 7.02  | 1.59E-01 | 7.07    | 13.73 | 6.07E-01 |
| cg04794832 | 21.68  | 10.44 | 3.78E-02 | 40.45  | 29.25 | 1.67E-01 | -142.44 | 122.21 | 2.44E-01 | 21.84  | 11.70 | 6.18E-02 | 2.35    | 39.95 | 9.53E-01 |
| cg15392054 | -7.60  | 3.66  | 3.78E-02 | -18.42 | 8.07  | 2.24E-02 | 0.88    | 16.08  | 9.56E-01 | -3.88  | 4.68  | 4.06E-01 | -11.44  | 10.21 | 2.62E-01 |
| cg15377758 | -16.17 | 7.79  | 3.78E-02 | -16.67 | 19.11 | 3.83E-01 | -4.74   | 23.03  | 8.37E-01 | -18.19 | 9.80  | 6.35E-02 | -15.59  | 26.21 | 5.52E-01 |
| cg12108956 | -28.47 | 13.71 | 3.79E-02 | -17.17 | 25.28 | 4.97E-01 | -173.98 | 142.45 | 2.22E-01 | -36.09 | 17.50 | 3.92E-02 | 3.97    | 47.53 | 9.33E-01 |
| cg13504933 | 14.11  | 6.80  | 3.79E-02 | -7.89  | 21.78 | 7.17E-01 | 7.11    | 20.26  | 7.26E-01 | 16.38  | 7.90  | 3.82E-02 | 38.85   | 30.22 | 1.99E-01 |
| cg09935822 | 16.54  | 7.96  | 3.79E-02 | 11.05  | 15.87 | 4.86E-01 | 30.60   | 45.29  | 4.99E-01 | 15.79  | 9.85  | 1.09E-01 | 39.32   | 31.71 | 2.15E-01 |
| cg12786605 | 14.39  | 6.93  | 3.79E-02 | -3.36  | 13.15 | 7.98E-01 | 30.58   | 30.52  | 3.16E-01 | 20.93  | 9.09  | 2.13E-02 | 17.63   | 23.14 | 4.46E-01 |
| cg27660756 | -9.85  | 4.74  | 3.79E-02 | -9.99  | 10.32 | 3.33E-01 | -14.78  | 19.02  | 4.37E-01 | -10.90 | 6.05  | 7.18E-02 | -1.12   | 14.18 | 9.37E-01 |
| cg26379258 | 14.07  | 6.78  | 3.79E-02 | 33.88  | 10.82 | 1.75E-03 | 18.53   | 15.96  | 2.46E-01 | 9.70   | 7.21  | 1.79E-01 | 2.38    | 7.87  | 7.62E-01 |
| cg01979157 | -14.88 | 7.17  | 3.79E-02 | -28.58 | 14.16 | 4.35E-02 | -21.82  | 16.91  | 1.97E-01 | -7.22  | 10.89 | 5.08E-01 | -3.93   | 19.76 | 8.42E-01 |
| cg14343017 | -8.95  | 4.31  | 3.79E-02 | -6.37  | 6.09  | 2.96E-01 | -20.78  | 11.05  | 6.00E-02 | -15.06 | 12.09 | 2.13E-01 | -3.11   | 9.19  | 7.35E-01 |
| cg25730685 | 20.37  | 9.81  | 3.79E-02 | 41.05  | 35.96 | 2.54E-01 | 4.20    | 73.32  | 9.54E-01 | 17.99  | 11.25 | 1.10E-01 | 24.16   | 25.59 | 3.45E-01 |
| cg04686204 | 16.14  | 7.77  | 3.79E-02 | 17.71  | 11.51 | 1.24E-01 | 10.11   | 14.90  | 4.98E-01 | 21.24  | 22.45 | 3.44E-01 | 18.20   | 19.94 | 3.62E-01 |
| cg16871520 | 14.65  | 7.06  | 3.79E-02 | 15.48  | 10.62 | 1.45E-01 | 18.09   | 14.60  | 2.15E-01 | 12.63  | 17.65 | 4.74E-01 | 9.50    | 17.36 | 5.84E-01 |
| cg16386806 | -11.89 | 5.73  | 3.79E-02 | -2.27  | 14.19 | 8.73E-01 | -23.42  | 25.19  | 3.52E-01 | -10.26 | 6.91  | 1.38E-01 | -33.03  | 18.22 | 6.98E-02 |
| cg26554646 | -42.36 | 20.40 | 3.79E-02 | -64.70 | 36.18 | 7.37E-02 | -145.82 | 207.53 | 4.82E-01 | -17.93 | 15.65 | 2.52E-01 | -100.49 | 49.01 | 4.03E-02 |
| cg02311364 | 10.29  | 4.96  | 3.79E-02 | 4.88   | 7.32  | 5.05E-01 | 24.81   | 11.44  | 3.00E-02 | 2.87   | 11.54 | 8.03E-01 | 16.91   | 12.04 | 1.60E-01 |
| cg07404400 | -19.61 | 9.44  | 3.79E-02 | -14.84 | 14.57 | 3.09E-01 | -19.74  | 23.80  | 4.07E-01 | -42.39 | 16.28 | 9.20E-03 | 2.42    | 18.82 | 8.98E-01 |
| cg07908223 | 15.30  | 7.37  | 3.79E-02 | 41.58  | 19.42 | 3.22E-02 | 6.31    | 29.57  | 8.31E-01 | 12.82  | 8.70  | 1.41E-01 | -3.51   | 26.48 | 8.95E-01 |
| cg24353489 | -35.54 | 17.12 | 3.79E-02 | -31.29 | 19.96 | 1.17E-01 | -23.70  | 78.24  | 7.62E-01 | 51.32  | 85.37 | 5.48E-01 | -76.24  | 40.73 | 6.12E-02 |

|            |        |       |          |        |       |          |        |        |          |        |       |          |        |       |          |
|------------|--------|-------|----------|--------|-------|----------|--------|--------|----------|--------|-------|----------|--------|-------|----------|
| cg18300555 | -7.64  | 3.68  | 3.79E-02 | -4.24  | 5.62  | 4.50E-01 | -13.15 | 9.31   | 1.58E-01 | -2.77  | 7.80  | 7.22E-01 | -16.32 | 8.38  | 5.14E-02 |
| cg18304704 | -13.74 | 6.62  | 3.79E-02 | -16.26 | 8.39  | 5.25E-02 | -3.10  | 17.27  | 8.57E-01 | -13.56 | 31.88 | 6.71E-01 | -13.76 | 15.31 | 3.69E-01 |
| cg12570032 | -10.07 | 4.85  | 3.79E-02 | -7.54  | 7.29  | 3.01E-01 | -0.91  | 10.93  | 9.33E-01 | -11.78 | 12.61 | 3.50E-01 | -22.67 | 10.53 | 3.14E-02 |
| cg08824961 | 10.40  | 5.01  | 3.79E-02 | 10.61  | 7.47  | 1.55E-01 | -2.05  | 12.65  | 8.71E-01 | 10.50  | 16.00 | 5.12E-01 | 16.64  | 9.21  | 7.08E-02 |
| cg18780259 | 10.13  | 4.88  | 3.79E-02 | 1.99   | 8.69  | 8.19E-01 | -3.10  | 15.37  | 8.40E-01 | 15.43  | 7.42  | 3.76E-02 | 20.79  | 12.55 | 9.76E-02 |
| cg27121095 | 16.01  | 7.71  | 3.79E-02 | 3.16   | 17.44 | 8.56E-01 | -17.05 | 58.55  | 7.71E-01 | 19.74  | 9.16  | 3.11E-02 | 21.81  | 27.72 | 4.32E-01 |
| cg24993354 | 38.08  | 18.34 | 3.79E-02 | 20.72  | 25.27 | 4.12E-01 | 29.20  | 48.57  | 5.48E-01 | 64.76  | 42.73 | 1.30E-01 | 75.71  | 47.99 | 1.15E-01 |
| cg13439463 | 18.01  | 8.68  | 3.79E-02 | 25.03  | 19.84 | 2.07E-01 | 7.82   | 21.55  | 7.17E-01 | 19.77  | 12.00 | 9.96E-02 | 13.09  | 24.60 | 5.95E-01 |
| cg14577406 | 22.24  | 10.71 | 3.79E-02 | 31.03  | 19.16 | 1.05E-01 | 23.70  | 23.88  | 3.21E-01 | 11.08  | 18.29 | 5.45E-01 | 27.73  | 28.31 | 3.27E-01 |
| cg22624697 | -13.09 | 6.31  | 3.79E-02 | -14.34 | 13.92 | 3.03E-01 | -11.54 | 26.02  | 6.57E-01 | -15.04 | 7.76  | 5.26E-02 | 6.19   | 23.00 | 7.88E-01 |
| cg14099812 | -48.42 | 23.33 | 3.79E-02 | -56.47 | 31.99 | 7.75E-02 | 30.52  | 121.08 | 8.01E-01 | -93.97 | 49.28 | 5.65E-02 | 7.36   | 51.26 | 8.86E-01 |
| cg13468772 | 19.37  | 9.33  | 3.79E-02 | 16.13  | 21.37 | 4.50E-01 | 16.65  | 44.94  | 7.11E-01 | 27.31  | 11.43 | 1.69E-02 | -25.87 | 29.41 | 3.79E-01 |
| cg15793573 | 52.51  | 25.29 | 3.79E-02 | 31.72  | 28.14 | 2.60E-01 | 3.50   | 30.87  | 9.10E-01 | 154.09 | 63.56 | 1.53E-02 | 80.40  | 30.05 | 7.46E-03 |
| cg16252995 | 12.37  | 5.96  | 3.79E-02 | 15.45  | 16.93 | 3.61E-01 | 31.85  | 16.06  | 4.74E-02 | 9.36   | 7.30  | 2.00E-01 | -2.37  | 22.25 | 9.15E-01 |
| cg09976142 | -2.65  | 1.28  | 3.79E-02 | -3.70  | 1.81  | 4.13E-02 | -2.05  | 3.02   | 4.98E-01 | 0.22   | 3.91  | 9.55E-01 | -2.17  | 2.73  | 4.28E-01 |
| cg26605712 | -14.78 | 7.12  | 3.79E-02 | -31.76 | 17.00 | 6.18E-02 | 3.96   | 22.71  | 8.62E-01 | -10.76 | 9.06  | 2.35E-01 | -27.13 | 21.58 | 2.09E-01 |
| cg01617071 | -7.03  | 3.39  | 3.79E-02 | -6.99  | 4.85  | 1.50E-01 | -1.05  | 7.26   | 8.85E-01 | -4.49  | 9.41  | 6.33E-01 | -16.97 | 8.32  | 4.12E-02 |
| cg05259891 | 11.92  | 5.74  | 3.79E-02 | 10.08  | 7.53  | 1.81E-01 | 25.27  | 12.57  | 4.43E-02 | 3.48   | 18.69 | 8.52E-01 | 3.94   | 16.93 | 8.16E-01 |
| cg00702325 | -17.36 | 8.36  | 3.79E-02 | -24.48 | 16.07 | 1.28E-01 | -12.50 | 31.70  | 6.93E-01 | -13.47 | 11.85 | 2.56E-01 | -19.49 | 20.80 | 3.49E-01 |
| cg25338134 | 7.52   | 3.62  | 3.79E-02 | 9.11   | 4.81  | 5.80E-02 | 8.05   | 8.80   | 3.61E-01 | 18.04  | 12.89 | 1.62E-01 | -2.38  | 8.44  | 7.78E-01 |
| cg05167973 | 21.56  | 10.39 | 3.79E-02 | 8.16   | 16.29 | 6.16E-01 | 24.04  | 28.57  | 4.00E-01 | 46.47  | 24.05 | 5.33E-02 | 23.29  | 19.82 | 2.40E-01 |
| cg09850925 | -13.77 | 6.63  | 3.79E-02 | -29.82 | 15.92 | 6.11E-02 | 10.83  | 20.40  | 5.95E-01 | -11.90 | 8.33  | 1.53E-01 | -25.38 | 22.58 | 2.61E-01 |
| cg02875487 | 14.78  | 7.12  | 3.79E-02 | 14.31  | 11.84 | 2.27E-01 | 16.03  | 13.70  | 2.42E-01 | 20.15  | 15.38 | 1.90E-01 | 6.18   | 18.20 | 7.34E-01 |
| cg26199631 | -10.36 | 4.99  | 3.79E-02 | -12.58 | 7.44  | 9.09E-02 | 5.49   | 11.15  | 6.22E-01 | -20.65 | 13.97 | 1.39E-01 | -14.22 | 10.57 | 1.79E-01 |
| cg23204908 | -11.08 | 5.34  | 3.79E-02 | -16.61 | 12.23 | 1.74E-01 | 3.90   | 23.47  | 8.68E-01 | -10.76 | 6.66  | 1.06E-01 | -10.48 | 15.78 | 5.07E-01 |
| cg27003682 | 16.69  | 8.04  | 3.79E-02 | -0.78  | 22.81 | 9.73E-01 | -68.76 | 105.00 | 5.13E-01 | 18.66  | 9.65  | 5.31E-02 | 24.11  | 19.19 | 2.09E-01 |
| cg00031187 | -15.49 | 7.46  | 3.79E-02 | 1.74   | 20.43 | 9.32E-01 | -42.46 | 24.05  | 7.76E-02 | -15.57 | 8.90  | 8.04E-02 | -10.28 | 28.65 | 7.20E-01 |
| cg23842870 | 10.61  | 5.11  | 3.79E-02 | 13.69  | 6.81  | 4.45E-02 | -4.76  | 13.85  | 7.31E-01 | 4.10   | 13.94 | 7.69E-01 | 18.09  | 12.56 | 1.50E-01 |
| cg13855862 | 17.63  | 8.50  | 3.79E-02 | 21.07  | 15.91 | 1.85E-01 | 18.59  | 17.18  | 2.79E-01 | 10.19  | 15.75 | 5.17E-01 | 22.92  | 20.07 | 2.53E-01 |
| cg01380884 | 13.22  | 6.37  | 3.80E-02 | 8.77   | 8.73  | 3.16E-01 | 17.21  | 13.37  | 1.98E-01 | -0.57  | 20.56 | 9.78E-01 | 32.37  | 16.70 | 5.26E-02 |
| cg05589564 | 15.00  | 7.23  | 3.80E-02 | 6.17   | 10.48 | 5.56E-01 | 26.74  | 36.40  | 4.63E-01 | 24.36  | 12.14 | 4.48E-02 | 18.27  | 20.04 | 3.62E-01 |
| cg25468554 | 35.43  | 17.07 | 3.80E-02 | 75.81  | 32.34 | 1.91E-02 | -23.28 | 127.29 | 8.55E-01 | 15.06  | 18.60 | 4.18E-01 | 63.01  | 46.75 | 1.78E-01 |
| cg02052762 | 4.45   | 2.15  | 3.80E-02 | 3.30   | 2.63  | 2.09E-01 | 8.79   | 5.67   | 1.21E-01 | 7.99   | 7.19  | 2.67E-01 | 2.81   | 6.75  | 6.77E-01 |
| cg14448086 | 72.61  | 34.99 | 3.80E-02 | 100.68 | 48.00 | 3.59E-02 | 234.21 | 203.44 | 2.50E-01 | -11.03 | 81.52 | 8.92E-01 | 55.79  | 69.31 | 4.21E-01 |
| cg07023594 | -22.13 | 10.66 | 3.80E-02 | -21.52 | 21.35 | 3.13E-01 | 24.44  | 48.00  | 6.11E-01 | -32.71 | 13.96 | 1.91E-02 | 9.73   | 31.18 | 7.55E-01 |

|            |        |       |          |        |       |          |         |        |          |        |       |          |         |       |          |
|------------|--------|-------|----------|--------|-------|----------|---------|--------|----------|--------|-------|----------|---------|-------|----------|
| cg14995047 | 20.42  | 9.84  | 3.80E-02 | 27.44  | 19.81 | 1.66E-01 | 20.63   | 39.79  | 6.04E-01 | 16.44  | 12.79 | 1.99E-01 | 26.46   | 30.98 | 3.93E-01 |
| cg03002479 | 12.57  | 6.06  | 3.80E-02 | 12.87  | 14.23 | 3.66E-01 | 5.72    | 17.25  | 7.40E-01 | 9.64   | 7.96  | 2.26E-01 | 34.11   | 17.82 | 5.56E-02 |
| cg17363540 | -8.84  | 4.26  | 3.80E-02 | -8.52  | 4.87  | 7.99E-02 | -19.25  | 7.39   | 9.24E-03 | 11.53  | 12.91 | 3.72E-01 | -7.70   | 6.14  | 2.10E-01 |
| cg21566177 | 5.66   | 2.73  | 3.80E-02 | 5.03   | 3.88  | 1.95E-01 | 6.33    | 6.24   | 3.11E-01 | 1.70   | 12.02 | 8.88E-01 | 7.13    | 5.31  | 1.79E-01 |
| cg24067075 | -12.69 | 6.12  | 3.80E-02 | -26.64 | 12.70 | 3.59E-02 | -13.93  | 23.58  | 5.55E-01 | -11.16 | 8.17  | 1.72E-01 | 4.99    | 16.40 | 7.61E-01 |
| cg20128188 | -41.43 | 19.96 | 3.80E-02 | -72.88 | 29.75 | 1.43E-02 | 32.30   | 94.01  | 7.31E-01 | -26.27 | 38.35 | 4.93E-01 | -12.63  | 41.30 | 7.60E-01 |
| cg06276653 | -16.46 | 7.93  | 3.80E-02 | -5.75  | 20.13 | 7.75E-01 | 2.61    | 25.23  | 9.18E-01 | -24.29 | 9.79  | 1.31E-02 | 1.53    | 26.63 | 9.54E-01 |
| cg01697972 | -49.18 | 23.70 | 3.80E-02 | -17.07 | 30.90 | 5.81E-01 | -104.74 | 59.10  | 7.64E-02 | -34.53 | 66.67 | 6.05E-01 | -106.69 | 54.96 | 5.22E-02 |
| cg10944051 | -37.94 | 18.29 | 3.80E-02 | -20.45 | 48.40 | 6.73E-01 | -269.99 | 212.30 | 2.03E-01 | -43.62 | 20.78 | 3.58E-02 | 9.91    | 66.49 | 8.82E-01 |
| cg07122905 | -7.48  | 3.61  | 3.80E-02 | -5.76  | 4.85  | 2.35E-01 | -21.73  | 9.80   | 2.66E-02 | -6.42  | 8.86  | 4.69E-01 | -2.00   | 9.44  | 8.32E-01 |
| cg22762992 | -3.87  | 1.87  | 3.80E-02 | -3.34  | 2.67  | 2.10E-01 | -4.10   | 4.05   | 3.11E-01 | -3.65  | 6.37  | 5.66E-01 | -4.96   | 4.06  | 2.22E-01 |
| cg27610821 | -6.92  | 3.34  | 3.80E-02 | -6.23  | 6.27  | 3.20E-01 | -5.13   | 8.07   | 5.25E-01 | -5.61  | 6.68  | 4.01E-01 | -9.73   | 6.13  | 1.13E-01 |
| cg00990022 | 11.86  | 5.71  | 3.80E-02 | 15.87  | 8.81  | 7.17E-02 | 21.01   | 17.30  | 2.25E-01 | 11.44  | 17.36 | 5.10E-01 | 4.56    | 9.50  | 6.31E-01 |
| cg06611109 | -7.53  | 3.63  | 3.80E-02 | -12.96 | 6.82  | 5.74E-02 | -2.51   | 8.73   | 7.74E-01 | -9.51  | 5.75  | 9.82E-02 | 2.51    | 9.53  | 7.92E-01 |
| cg03691812 | 39.61  | 19.09 | 3.80E-02 | 47.34  | 23.76 | 4.64E-02 | 21.03   | 115.56 | 8.56E-01 | 96.08  | 61.68 | 1.19E-01 | -3.14   | 39.68 | 9.37E-01 |
| cg00492309 | 18.60  | 8.97  | 3.80E-02 | 31.24  | 18.45 | 9.04E-02 | 2.41    | 17.45  | 8.90E-01 | 14.50  | 14.92 | 3.31E-01 | 38.57   | 24.07 | 1.09E-01 |
| cg00179328 | 25.76  | 12.42 | 3.80E-02 | 36.64  | 21.31 | 8.56E-02 | 17.38   | 77.42  | 8.22E-01 | 11.35  | 11.07 | 3.05E-01 | 72.00   | 32.80 | 2.82E-02 |
| cg02621376 | -8.98  | 4.33  | 3.80E-02 | -17.40 | 6.03  | 3.93E-03 | -14.76  | 11.44  | 1.97E-01 | -1.62  | 5.59  | 7.72E-01 | -4.75   | 8.67  | 5.84E-01 |
| cg09379497 | 5.12   | 2.47  | 3.80E-02 | 3.69   | 3.03  | 2.23E-01 | 13.38   | 6.29   | 3.35E-02 | 3.59   | 8.81  | 6.84E-01 | 3.17    | 7.70  | 6.81E-01 |
| cg23166773 | 7.54   | 3.63  | 3.80E-02 | 6.93   | 5.00  | 1.66E-01 | 12.92   | 8.79   | 1.42E-01 | 10.96  | 9.66  | 2.56E-01 | 0.73    | 9.11  | 9.36E-01 |
| cg05886087 | 6.23   | 3.00  | 3.80E-02 | 3.69   | 3.97  | 3.53E-01 | 13.85   | 7.88   | 7.88E-02 | 10.02  | 8.38  | 2.32E-01 | 5.32    | 7.64  | 4.87E-01 |
| cg14028447 | -15.28 | 7.37  | 3.80E-02 | -25.23 | 13.29 | 5.76E-02 | 1.80    | 20.95  | 9.32E-01 | -19.37 | 11.19 | 8.36E-02 | 4.65    | 19.95 | 8.16E-01 |
| cg01252672 | 27.80  | 13.40 | 3.80E-02 | 47.56  | 35.99 | 1.86E-01 | 108.51  | 157.94 | 4.92E-01 | 15.99  | 12.09 | 1.86E-01 | 80.96   | 39.51 | 4.04E-02 |
| cg17697016 | 11.66  | 5.62  | 3.80E-02 | 7.97   | 8.15  | 3.28E-01 | 4.83    | 13.22  | 7.15E-01 | 22.51  | 23.11 | 3.30E-01 | 19.93   | 10.54 | 5.87E-02 |
| cg26411822 | -6.19  | 2.98  | 3.80E-02 | -7.48  | 4.51  | 9.75E-02 | -1.64   | 5.77   | 7.77E-01 | -18.60 | 9.10  | 4.09E-02 | -2.57   | 6.87  | 7.08E-01 |
| cg21117699 | -9.13  | 4.40  | 3.80E-02 | -8.71  | 6.43  | 1.75E-01 | -17.57  | 11.35  | 1.21E-01 | -4.29  | 11.36 | 7.06E-01 | -7.63   | 9.18  | 4.06E-01 |
| cg23772226 | 5.24   | 2.52  | 3.80E-02 | 3.71   | 3.20  | 2.47E-01 | 13.29   | 5.96   | 2.59E-02 | 6.56   | 9.34  | 4.82E-01 | 0.57    | 7.11  | 9.37E-01 |
| cg26056166 | -18.50 | 8.92  | 3.80E-02 | -24.95 | 15.01 | 9.65E-02 | -2.48   | 21.44  | 9.08E-01 | -30.94 | 17.44 | 7.61E-02 | -5.53   | 19.33 | 7.75E-01 |
| cg24359188 | 15.33  | 7.39  | 3.80E-02 | 11.14  | 9.98  | 2.64E-01 | 23.92   | 16.18  | 1.39E-01 | 37.73  | 28.17 | 1.80E-01 | 9.39    | 17.68 | 5.95E-01 |
| cg17641857 | 22.09  | 10.65 | 3.80E-02 | 73.44  | 48.54 | 1.30E-01 | 29.36   | 148.00 | 8.43E-01 | 18.78  | 11.51 | 1.03E-01 | 25.59   | 35.30 | 4.69E-01 |
| cg14097117 | 17.23  | 8.31  | 3.80E-02 | 7.87   | 14.91 | 5.97E-01 | 10.77   | 16.47  | 5.13E-01 | 18.92  | 20.01 | 3.45E-01 | 33.45   | 16.21 | 3.90E-02 |
| cg17251097 | 35.98  | 17.35 | 3.80E-02 | 46.88  | 49.28 | 3.41E-01 | 42.58   | 174.95 | 8.08E-01 | 41.52  | 19.55 | 3.37E-02 | -36.89  | 61.65 | 5.50E-01 |
| cg25586410 | 9.12   | 4.39  | 3.80E-02 | 11.57  | 5.77  | 4.48E-02 | 2.49    | 11.11  | 8.23E-01 | 21.36  | 21.77 | 3.27E-01 | 5.11    | 9.33  | 5.84E-01 |
| cg00608006 | -36.38 | 17.54 | 3.81E-02 | -34.73 | 21.23 | 1.02E-01 | 0.27    | 82.03  | 9.97E-01 | 68.47  | 91.14 | 4.52E-01 | -64.81  | 36.18 | 7.32E-02 |
| cg13449377 | 6.49   | 3.13  | 3.81E-02 | 12.07  | 5.59  | 3.07E-02 | 7.29    | 8.72   | 4.03E-01 | 4.95   | 4.78  | 3.01E-01 | -2.74   | 8.71  | 7.53E-01 |

|            |        |       |          |        |       |          |         |        |          |         |       |          |        |       |          |
|------------|--------|-------|----------|--------|-------|----------|---------|--------|----------|---------|-------|----------|--------|-------|----------|
| cg26277008 | 22.85  | 11.02 | 3.81E-02 | 37.26  | 19.39 | 5.47E-02 | 11.15   | 25.83  | 6.66E-01 | 9.16    | 18.25 | 6.15E-01 | 41.77  | 30.50 | 1.71E-01 |
| cg22367310 | -12.96 | 6.25  | 3.81E-02 | -8.44  | 9.95  | 3.96E-01 | -33.56  | 15.61  | 3.16E-02 | -12.43  | 13.34 | 3.51E-01 | -6.77  | 13.12 | 6.06E-01 |
| cg17205313 | -6.91  | 3.33  | 3.81E-02 | -7.53  | 4.87  | 1.22E-01 | -13.97  | 8.36   | 9.48E-02 | -0.16   | 8.38  | 9.85E-01 | -5.32  | 7.19  | 4.60E-01 |
| cg03195015 | 12.62  | 6.09  | 3.81E-02 | 9.59   | 16.59 | 5.63E-01 | 7.97    | 31.75  | 8.02E-01 | 12.65   | 6.96  | 6.94E-02 | 21.25  | 23.85 | 3.73E-01 |
| cg12788061 | 37.98  | 18.31 | 3.81E-02 | 81.88  | 50.54 | 1.05E-01 | 24.77   | 180.32 | 8.91E-01 | 30.11   | 20.80 | 1.48E-01 | 43.74  | 63.48 | 4.91E-01 |
| cg22692659 | 13.92  | 6.71  | 3.81E-02 | 7.73   | 13.54 | 5.68E-01 | 31.36   | 18.07  | 8.27E-02 | 16.35   | 11.10 | 1.41E-01 | 6.86   | 13.40 | 6.09E-01 |
| cg02704345 | -23.93 | 11.54 | 3.81E-02 | -16.71 | 30.21 | 5.80E-01 | 147.11  | 126.37 | 2.44E-01 | -28.40  | 13.29 | 3.26E-02 | -14.19 | 38.05 | 7.09E-01 |
| cg03058012 | 20.23  | 9.75  | 3.81E-02 | 36.43  | 18.77 | 5.23E-02 | 1.15    | 22.86  | 9.60E-01 | 10.53   | 11.86 | 3.75E-01 | 51.08  | 26.00 | 4.95E-02 |
| cg26931990 | 11.12  | 5.36  | 3.81E-02 | 6.95   | 9.09  | 4.45E-01 | 8.79    | 11.12  | 4.29E-01 | 11.98   | 11.05 | 2.78E-01 | 20.82  | 12.49 | 9.54E-02 |
| cg18848301 | 23.18  | 11.18 | 3.81E-02 | 25.83  | 18.04 | 1.52E-01 | 72.26   | 31.61  | 2.23E-02 | 9.13    | 7.73  | 2.37E-01 | 33.16  | 26.96 | 2.19E-01 |
| cg22075671 | -30.96 | 14.93 | 3.81E-02 | -21.32 | 36.17 | 5.56E-01 | -74.03  | 146.23 | 6.13E-01 | -39.09  | 17.54 | 2.58E-02 | 18.57  | 48.50 | 7.02E-01 |
| cg15869649 | -9.21  | 4.44  | 3.81E-02 | -7.30  | 6.64  | 2.72E-01 | -18.14  | 10.58  | 8.64E-02 | 3.97    | 14.22 | 7.80E-01 | -11.23 | 8.40  | 1.81E-01 |
| cg27067282 | 41.07  | 19.80 | 3.81E-02 | 41.97  | 26.74 | 1.16E-01 | 177.10  | 119.15 | 1.37E-01 | 28.07   | 40.88 | 4.92E-01 | 34.71  | 45.53 | 4.46E-01 |
| cg07154196 | 26.26  | 12.66 | 3.81E-02 | 20.87  | 22.68 | 3.57E-01 | -78.42  | 88.44  | 3.75E-01 | 33.66   | 17.03 | 4.81E-02 | 23.92  | 37.29 | 5.21E-01 |
| cg17132148 | 7.47   | 3.60  | 3.81E-02 | 5.67   | 5.04  | 2.61E-01 | 12.15   | 7.13   | 8.82E-02 | 14.11   | 11.47 | 2.19E-01 | 0.58   | 9.82  | 9.53E-01 |
| cg16472834 | -8.73  | 4.21  | 3.81E-02 | -4.66  | 6.17  | 4.50E-01 | -17.82  | 10.98  | 1.04E-01 | -7.53   | 9.24  | 4.15E-01 | -13.20 | 9.93  | 1.83E-01 |
| cg01008256 | 8.84   | 4.27  | 3.81E-02 | 9.51   | 6.20  | 1.25E-01 | 10.68   | 8.39   | 2.03E-01 | 16.40   | 12.99 | 2.07E-01 | -1.17  | 10.66 | 9.12E-01 |
| cg11291313 | 9.39   | 4.53  | 3.81E-02 | 19.26  | 8.77  | 2.81E-02 | 8.73    | 10.45  | 4.03E-01 | 9.97    | 8.48  | 2.39E-01 | -0.91  | 8.90  | 9.18E-01 |
| cg19820248 | -45.29 | 21.84 | 3.81E-02 | -22.98 | 26.19 | 3.80E-01 | 67.04   | 152.17 | 6.60E-01 | -106.00 | 81.25 | 1.92E-01 | -91.68 | 41.75 | 2.81E-02 |
| cg01152015 | 13.62  | 6.57  | 3.81E-02 | 9.58   | 10.43 | 3.58E-01 | 15.41   | 13.04  | 2.37E-01 | -0.24   | 19.76 | 9.90E-01 | 24.86  | 13.44 | 6.45E-02 |
| cg18356683 | 16.90  | 8.15  | 3.81E-02 | 31.21  | 17.76 | 7.88E-02 | -11.01  | 41.96  | 7.93E-01 | 14.02   | 10.13 | 1.66E-01 | 15.91  | 25.19 | 5.28E-01 |
| cg06949778 | -14.52 | 7.00  | 3.81E-02 | -23.22 | 10.65 | 2.92E-02 | -1.47   | 16.30  | 9.28E-01 | -5.08   | 16.08 | 7.52E-01 | -16.77 | 15.92 | 2.92E-01 |
| cg24951989 | -10.68 | 5.15  | 3.81E-02 | -22.55 | 11.83 | 5.66E-02 | 12.31   | 16.90  | 4.67E-01 | -8.91   | 5.63  | 1.14E-01 | -18.78 | 13.86 | 1.76E-01 |
| cg04272560 | 25.66  | 12.38 | 3.81E-02 | 54.89  | 42.74 | 1.99E-01 | -121.19 | 149.60 | 4.18E-01 | 27.00   | 13.40 | 4.40E-02 | -20.10 | 52.07 | 6.99E-01 |
| cg15635600 | 7.63   | 3.68  | 3.81E-02 | 4.76   | 5.73  | 4.06E-01 | 13.28   | 7.57   | 7.92E-02 | -5.21   | 10.88 | 6.32E-01 | 13.22  | 7.58  | 8.10E-02 |
| cg00777689 | 12.02  | 5.80  | 3.81E-02 | 34.67  | 16.47 | 3.53E-02 | 8.81    | 24.89  | 7.23E-01 | 12.42   | 7.53  | 9.89E-02 | -0.53  | 12.13 | 9.65E-01 |
| cg18646365 | -10.78 | 5.20  | 3.81E-02 | -10.48 | 7.40  | 1.57E-01 | -3.10   | 12.87  | 8.10E-01 | 7.74    | 17.96 | 6.66E-01 | -22.11 | 10.19 | 3.00E-02 |
| cg07102397 | 4.50   | 2.17  | 3.81E-02 | 4.34   | 2.90  | 1.35E-01 | 11.43   | 5.37   | 3.33E-02 | 1.93    | 5.21  | 7.11E-01 | -1.29  | 6.80  | 8.50E-01 |
| cg24778896 | 9.02   | 4.35  | 3.81E-02 | 8.27   | 6.15  | 1.78E-01 | 15.48   | 9.93   | 1.19E-01 | -1.58   | 12.03 | 8.95E-01 | 11.95  | 10.33 | 2.47E-01 |
| cg15227168 | -7.91  | 3.81  | 3.81E-02 | -12.02 | 9.31  | 1.97E-01 | -3.74   | 11.07  | 7.36E-01 | -6.10   | 4.86  | 2.10E-01 | -17.30 | 12.18 | 1.55E-01 |
| cg12524168 | -8.39  | 4.05  | 3.81E-02 | -10.96 | 5.72  | 5.54E-02 | -7.24   | 9.73   | 4.57E-01 | 10.02   | 13.99 | 4.74E-01 | -10.26 | 8.21  | 2.11E-01 |
| cg20978858 | 12.13  | 5.85  | 3.81E-02 | 7.33   | 8.98  | 4.14E-01 | 26.51   | 12.04  | 2.77E-02 | 13.48   | 17.30 | 4.36E-01 | 5.42   | 12.33 | 6.60E-01 |
| cg03768338 | -8.13  | 3.92  | 3.81E-02 | -10.87 | 5.93  | 6.66E-02 | -6.44   | 10.31  | 5.32E-01 | -13.88  | 6.63  | 3.65E-02 | 5.02   | 8.56  | 5.58E-01 |
| cg02298401 | 13.59  | 6.55  | 3.81E-02 | 10.99  | 13.87 | 4.28E-01 | 19.31   | 18.11  | 2.86E-01 | 7.83    | 7.89  | 3.21E-01 | 47.53  | 21.32 | 2.58E-02 |
| cg03551497 | 8.45   | 4.08  | 3.81E-02 | 24.60  | 10.10 | 1.48E-02 | 6.02    | 10.75  | 5.75E-01 | 5.34    | 4.93  | 2.79E-01 | 4.52   | 15.12 | 7.65E-01 |



|            |        |       |          |        |       |          |         |        |          |        |       |          |        |       |          |
|------------|--------|-------|----------|--------|-------|----------|---------|--------|----------|--------|-------|----------|--------|-------|----------|
| cg19184818 | 7.88   | 3.80  | 3.81E-02 | 21.68  | 9.90  | 2.86E-02 | 1.14    | 5.83   | 8.44E-01 | 11.28  | 7.33  | 1.24E-01 | 6.60   | 6.32  | 2.97E-01 |
| cg03224013 | 6.35   | 3.06  | 3.81E-02 | 2.37   | 4.67  | 6.12E-01 | 3.29    | 6.16   | 5.94E-01 | 15.58  | 6.51  | 1.67E-02 | 9.07   | 8.21  | 2.69E-01 |
| cg16034546 | 15.80  | 7.62  | 3.82E-02 | 17.12  | 16.71 | 3.06E-01 | -0.38   | 27.86  | 9.89E-01 | 15.87  | 9.79  | 1.05E-01 | 23.86  | 22.85 | 2.96E-01 |
| cg18206017 | 15.12  | 7.29  | 3.82E-02 | 17.92  | 16.52 | 2.78E-01 | 12.00   | 27.28  | 6.60E-01 | 15.18  | 10.15 | 1.35E-01 | 13.48  | 15.61 | 3.88E-01 |
| cg20145009 | 9.63   | 4.65  | 3.82E-02 | 4.23   | 7.20  | 5.57E-01 | 13.72   | 10.02  | 1.71E-01 | 22.79  | 12.16 | 6.09E-02 | 7.16   | 9.85  | 4.67E-01 |
| cg23912611 | 37.57  | 18.12 | 3.82E-02 | 31.78  | 22.37 | 1.55E-01 | 48.02   | 64.20  | 4.54E-01 | 62.97  | 94.69 | 5.06E-01 | 46.55  | 38.03 | 2.21E-01 |
| cg17071868 | -15.11 | 7.29  | 3.82E-02 | -20.07 | 13.14 | 1.27E-01 | -7.82   | 18.60  | 6.74E-01 | -18.87 | 12.56 | 1.33E-01 | -6.83  | 16.22 | 6.74E-01 |
| cg02974815 | 38.45  | 18.55 | 3.82E-02 | 12.74  | 63.13 | 8.40E-01 | -173.84 | 287.38 | 5.45E-01 | 37.02  | 20.43 | 7.01E-02 | 88.59  | 63.43 | 1.63E-01 |
| cg20042612 | -7.14  | 3.44  | 3.82E-02 | -6.44  | 4.48  | 1.51E-01 | -13.00  | 12.24  | 2.88E-01 | -3.50  | 10.62 | 7.42E-01 | -8.63  | 7.28  | 2.36E-01 |
| cg15229481 | 14.94  | 7.21  | 3.82E-02 | 20.76  | 12.18 | 8.83E-02 | 33.70   | 18.57  | 6.96E-02 | 18.38  | 18.18 | 3.12E-01 | -0.86  | 12.33 | 9.45E-01 |
| cg16001675 | 19.11  | 9.22  | 3.82E-02 | 5.62   | 13.90 | 6.86E-01 | 0.90    | 35.66  | 9.80E-01 | 35.04  | 10.47 | 8.13E-04 | 6.67   | 21.71 | 7.59E-01 |
| cg13270464 | 10.99  | 5.30  | 3.82E-02 | 16.55  | 8.37  | 4.80E-02 | -4.80   | 18.83  | 7.99E-01 | 10.72  | 8.58  | 2.12E-01 | 4.64   | 14.26 | 7.45E-01 |
| cg01216438 | 7.21   | 3.48  | 3.82E-02 | 8.77   | 7.01  | 2.11E-01 | 18.74   | 11.37  | 9.95E-02 | 5.57   | 5.65  | 3.24E-01 | 4.22   | 6.55  | 5.19E-01 |
| cg05139788 | 11.43  | 5.52  | 3.82E-02 | 16.26  | 7.33  | 2.65E-02 | 3.43    | 12.41  | 7.82E-01 | 31.62  | 14.80 | 3.26E-02 | 2.94   | 7.70  | 7.02E-01 |
| cg24730612 | 8.51   | 4.11  | 3.82E-02 | 5.38   | 6.03  | 3.72E-01 | 17.57   | 9.32   | 5.94E-02 | 14.71  | 7.88  | 6.22E-02 | -3.22  | 9.84  | 7.43E-01 |
| cg20378690 | 6.35   | 3.06  | 3.82E-02 | 6.38   | 4.21  | 1.29E-01 | 4.71    | 6.44   | 4.64E-01 | 6.96   | 10.03 | 4.88E-01 | 8.30   | 7.88  | 2.92E-01 |
| cg10046401 | 51.82  | 25.00 | 3.82E-02 | 67.72  | 37.39 | 7.01E-02 | 195.92  | 97.35  | 4.42E-02 | 16.69  | 54.12 | 7.58E-01 | 25.74  | 41.64 | 5.36E-01 |
| cg27605977 | -8.20  | 3.96  | 3.82E-02 | -20.49 | 8.26  | 1.31E-02 | -9.70   | 11.30  | 3.91E-01 | -3.58  | 5.25  | 4.95E-01 | -4.69  | 10.28 | 6.48E-01 |
| cg06227763 | -12.12 | 5.85  | 3.82E-02 | -24.98 | 12.49 | 4.55E-02 | -11.16  | 17.17  | 5.16E-01 | -6.83  | 8.12  | 4.00E-01 | -12.35 | 15.26 | 4.18E-01 |
| cg13774987 | 17.29  | 8.34  | 3.82E-02 | 37.52  | 20.91 | 7.28E-02 | 33.87   | 21.21  | 1.10E-01 | 8.43   | 11.05 | 4.46E-01 | 10.99  | 24.47 | 6.53E-01 |
| cg13644528 | 13.10  | 6.32  | 3.82E-02 | 9.50   | 8.63  | 2.71E-01 | 20.20   | 14.35  | 1.59E-01 | 9.56   | 17.96 | 5.95E-01 | 19.84  | 16.50 | 2.29E-01 |
| cg07544356 | -9.69  | 4.67  | 3.82E-02 | -7.02  | 10.04 | 4.84E-01 | -20.34  | 17.29  | 2.39E-01 | -12.35 | 6.05  | 4.13E-02 | 6.05   | 13.86 | 6.62E-01 |
| cg15165122 | 6.15   | 2.97  | 3.82E-02 | 8.00   | 4.49  | 7.51E-02 | 3.65    | 5.94   | 5.39E-01 | 11.37  | 8.07  | 1.58E-01 | 1.19   | 6.99  | 8.64E-01 |
| cg05795316 | 18.09  | 8.73  | 3.82E-02 | 9.53   | 11.77 | 4.18E-01 | 42.11   | 32.64  | 1.97E-01 | -12.89 | 34.85 | 7.11E-01 | 33.75  | 15.55 | 2.99E-02 |
| cg19721801 | -35.73 | 17.24 | 3.82E-02 | -41.81 | 33.18 | 2.08E-01 | 5.50    | 150.86 | 9.71E-01 | -31.48 | 22.50 | 1.62E-01 | -46.48 | 47.84 | 3.31E-01 |
| cg26429905 | 27.79  | 13.41 | 3.82E-02 | 31.73  | 14.81 | 3.22E-02 | 10.37   | 93.49  | 9.12E-01 | 33.76  | 62.30 | 5.88E-01 | 0.09   | 39.76 | 9.98E-01 |
| cg04112106 | 15.37  | 7.42  | 3.82E-02 | 43.02  | 17.61 | 1.46E-02 | 7.38    | 23.15  | 7.50E-01 | 6.30   | 8.89  | 4.79E-01 | 17.44  | 12.27 | 1.55E-01 |
| cg17331920 | 3.95   | 1.91  | 3.82E-02 | 2.69   | 2.87  | 3.50E-01 | 6.73    | 3.91   | 8.57E-02 | 3.55   | 3.78  | 3.48E-01 | 4.01   | 7.38  | 5.87E-01 |
| cg21011133 | 9.56   | 4.61  | 3.82E-02 | 6.12   | 12.96 | 6.37E-01 | 45.58   | 39.84  | 2.53E-01 | 10.30  | 5.11  | 4.39E-02 | -4.82  | 21.72 | 8.24E-01 |
| cg02888166 | 17.20  | 8.30  | 3.82E-02 | 4.17   | 13.34 | 7.54E-01 | 40.02   | 20.12  | 4.67E-02 | 14.62  | 18.05 | 4.18E-01 | 24.58  | 17.27 | 1.55E-01 |
| cg22159109 | 23.32  | 11.25 | 3.82E-02 | 17.13  | 23.52 | 4.66E-01 | 13.67   | 51.37  | 7.90E-01 | 23.28  | 14.28 | 1.03E-01 | 42.16  | 35.35 | 2.33E-01 |
| cg18651578 | 8.55   | 4.13  | 3.82E-02 | 4.78   | 5.92  | 4.20E-01 | 23.16   | 9.77   | 1.77E-02 | 6.87   | 10.04 | 4.94E-01 | 5.61   | 10.11 | 5.79E-01 |
| cg06163371 | 12.42  | 5.99  | 3.82E-02 | 18.42  | 8.91  | 3.88E-02 | -13.31  | 16.48  | 4.19E-01 | 9.91   | 15.39 | 5.19E-01 | 16.41  | 11.24 | 1.44E-01 |
| cg23752348 | 9.49   | 4.58  | 3.82E-02 | 4.85   | 6.86  | 4.80E-01 | 15.53   | 9.01   | 8.50E-02 | 12.10  | 13.24 | 3.61E-01 | 10.63  | 10.92 | 3.30E-01 |
| cg08116711 | 12.74  | 6.15  | 3.82E-02 | 27.08  | 15.44 | 7.95E-02 | -1.56   | 21.49  | 9.42E-01 | 12.46  | 7.37  | 9.11E-02 | -1.35  | 24.21 | 9.56E-01 |

|            |        |       |          |        |       |          |         |        |          |        |       |          |        |       |          |
|------------|--------|-------|----------|--------|-------|----------|---------|--------|----------|--------|-------|----------|--------|-------|----------|
| cg21837826 | -9.57  | 4.62  | 3.83E-02 | -19.75 | 11.81 | 9.44E-02 | -1.66   | 16.33  | 9.19E-01 | -8.10  | 5.80  | 1.63E-01 | -9.67  | 12.72 | 4.47E-01 |
| cg00055292 | 16.22  | 7.83  | 3.83E-02 | 9.13   | 12.50 | 4.65E-01 | 27.44   | 15.36  | 7.40E-02 | 8.47   | 22.18 | 7.03E-01 | 19.94  | 16.56 | 2.28E-01 |
| cg24435704 | 18.01  | 8.69  | 3.83E-02 | -1.56  | 18.25 | 9.32E-01 | 44.62   | 39.83  | 2.63E-01 | 17.83  | 11.28 | 1.14E-01 | 42.82  | 23.93 | 7.35E-02 |
| cg08033127 | -14.62 | 7.06  | 3.83E-02 | -2.83  | 20.49 | 8.90E-01 | -2.78   | 34.83  | 9.36E-01 | -14.71 | 7.99  | 6.56E-02 | -45.20 | 28.92 | 1.18E-01 |
| cg01058931 | 9.72   | 4.69  | 3.83E-02 | 12.25  | 5.54  | 2.71E-02 | 6.62    | 15.97  | 6.78E-01 | -14.29 | 28.28 | 6.13E-01 | 4.53   | 11.37 | 6.90E-01 |
| cg21974506 | -6.77  | 3.27  | 3.83E-02 | -8.41  | 4.90  | 8.59E-02 | -1.43   | 7.19   | 8.42E-01 | -13.98 | 9.32  | 1.34E-01 | -4.49  | 6.89  | 5.15E-01 |
| cg20832020 | -8.66  | 4.18  | 3.83E-02 | -6.64  | 6.39  | 2.99E-01 | -8.54   | 11.05  | 4.40E-01 | -4.23  | 8.36  | 6.13E-01 | -19.83 | 9.90  | 4.51E-02 |
| cg02245832 | -10.26 | 4.95  | 3.83E-02 | -25.87 | 11.16 | 2.04E-02 | 1.39    | 13.78  | 9.20E-01 | -8.12  | 6.69  | 2.25E-01 | -7.11  | 13.98 | 6.11E-01 |
| cg00809164 | 7.83   | 3.78  | 3.83E-02 | 10.59  | 6.74  | 1.16E-01 | 11.75   | 8.40   | 1.62E-01 | 10.43  | 8.28  | 2.08E-01 | -0.18  | 7.20  | 9.80E-01 |
| cg20235471 | -9.43  | 4.55  | 3.83E-02 | 1.40   | 11.09 | 8.99E-01 | -32.82  | 24.30  | 1.77E-01 | -9.95  | 5.29  | 6.01E-02 | -20.71 | 19.32 | 2.84E-01 |
| cg24678113 | -7.16  | 3.46  | 3.83E-02 | -7.26  | 4.41  | 9.94E-02 | 0.23    | 11.21  | 9.83E-01 | -15.17 | 11.72 | 1.96E-01 | -6.89  | 7.67  | 3.69E-01 |
| cg21511817 | -42.02 | 20.28 | 3.83E-02 | -18.31 | 54.46 | 7.37E-01 | -181.58 | 198.39 | 3.60E-01 | -44.61 | 23.28 | 5.53E-02 | -40.50 | 66.97 | 5.45E-01 |
| cg10789300 | -10.51 | 5.07  | 3.83E-02 | -24.12 | 9.09  | 7.98E-03 | 2.74    | 14.59  | 8.51E-01 | -6.02  | 4.67  | 1.97E-01 | -14.45 | 12.26 | 2.38E-01 |
| cg06451822 | -13.56 | 6.55  | 3.83E-02 | -11.25 | 14.06 | 4.24E-01 | -15.05  | 17.04  | 3.77E-01 | -7.43  | 7.77  | 3.38E-01 | -43.75 | 18.50 | 1.80E-02 |
| cg18297044 | -8.71  | 4.21  | 3.83E-02 | -1.70  | 7.75  | 8.26E-01 | -6.57   | 14.59  | 6.53E-01 | -11.80 | 5.72  | 3.91E-02 | -15.82 | 14.76 | 2.84E-01 |
| cg06100807 | 8.18   | 3.95  | 3.83E-02 | 8.62   | 13.73 | 5.30E-01 | -3.74   | 14.50  | 7.96E-01 | 9.40   | 4.91  | 5.55E-02 | 8.51   | 8.95  | 3.41E-01 |
| cg07703976 | -9.30  | 4.49  | 3.83E-02 | -7.77  | 6.26  | 2.15E-01 | -9.92   | 10.54  | 3.46E-01 | -0.40  | 12.64 | 9.75E-01 | -19.35 | 10.62 | 6.83E-02 |
| cg17478992 | -8.75  | 4.23  | 3.83E-02 | -12.26 | 6.19  | 4.75E-02 | -2.39   | 10.31  | 8.16E-01 | -3.21  | 9.75  | 7.42E-01 | -11.43 | 10.04 | 2.55E-01 |
| cg18186343 | 9.32   | 4.50  | 3.83E-02 | 2.75   | 5.49  | 6.16E-01 | 22.76   | 9.44   | 1.59E-02 | 13.04  | 13.86 | 3.47E-01 | 9.63   | 8.74  | 2.71E-01 |
| cg06959103 | -20.34 | 9.82  | 3.83E-02 | -40.74 | 17.44 | 1.95E-02 | -25.90  | 28.46  | 3.63E-01 | -13.25 | 16.30 | 4.16E-01 | 2.28   | 21.88 | 9.17E-01 |
| cg17954165 | -22.50 | 10.86 | 3.83E-02 | -18.37 | 22.05 | 4.05E-01 | -64.05  | 135.45 | 6.36E-01 | -23.46 | 13.30 | 7.77E-02 | -23.62 | 37.56 | 5.29E-01 |
| cg00105306 | 8.04   | 3.88  | 3.83E-02 | 7.53   | 5.36  | 1.60E-01 | 10.28   | 9.74   | 2.91E-01 | 18.06  | 10.33 | 8.04E-02 | -0.51  | 9.26  | 9.56E-01 |
| cg11649068 | 13.48  | 6.51  | 3.83E-02 | 10.59  | 15.64 | 4.98E-01 | -4.74   | 21.41  | 8.25E-01 | 14.50  | 8.67  | 9.47E-02 | 22.92  | 15.73 | 1.45E-01 |
| cg06357685 | 21.09  | 10.18 | 3.83E-02 | 11.36  | 20.04 | 5.71E-01 | 13.39   | 38.54  | 7.28E-01 | 19.70  | 13.73 | 1.51E-01 | 52.26  | 29.12 | 7.27E-02 |
| cg14469693 | -12.99 | 6.27  | 3.83E-02 | -16.05 | 11.54 | 1.64E-01 | -13.19  | 14.90  | 3.76E-01 | -11.28 | 10.65 | 2.90E-01 | -11.08 | 14.74 | 4.52E-01 |
| cg13920435 | 17.69  | 8.54  | 3.83E-02 | 37.00  | 26.12 | 1.57E-01 | -2.28   | 29.24  | 9.38E-01 | 17.02  | 10.68 | 1.11E-01 | 18.08  | 20.78 | 3.84E-01 |
| cg14725082 | 12.75  | 6.15  | 3.83E-02 | 12.83  | 9.15  | 1.61E-01 | 9.10    | 12.17  | 4.55E-01 | -4.79  | 14.19 | 7.36E-01 | 28.71  | 11.82 | 1.51E-02 |
| cg00249522 | -32.66 | 15.77 | 3.83E-02 | -22.71 | 13.21 | 8.56E-02 | 25.53   | 36.56  | 4.85E-01 | -76.44 | 25.24 | 2.46E-03 | -39.89 | 20.31 | 4.95E-02 |
| cg16704560 | 9.51   | 4.59  | 3.83E-02 | 11.89  | 6.07  | 5.01E-02 | 22.31   | 8.21   | 6.60E-03 | 2.04   | 6.21  | 7.43E-01 | 1.54   | 10.39 | 8.83E-01 |
| cg17656513 | 29.88  | 14.42 | 3.83E-02 | 47.98  | 41.26 | 2.45E-01 | -19.38  | 148.00 | 8.96E-01 | 23.86  | 16.18 | 1.40E-01 | 71.00  | 53.12 | 1.81E-01 |
| cg03719070 | 9.79   | 4.73  | 3.83E-02 | 4.13   | 9.20  | 6.54E-01 | 15.76   | 12.33  | 2.01E-01 | 10.75  | 7.84  | 1.70E-01 | 10.99  | 9.95  | 2.69E-01 |
| cg25704207 | -39.71 | 19.17 | 3.83E-02 | -51.64 | 23.87 | 3.05E-02 | -17.55  | 80.29  | 8.27E-01 | -25.88 | 81.62 | 7.51E-01 | -16.34 | 38.92 | 6.75E-01 |
| cg14426836 | 15.72  | 7.59  | 3.83E-02 | 38.11  | 18.93 | 4.41E-02 | 23.71   | 23.18  | 3.06E-01 | 10.43  | 9.36  | 2.65E-01 | 2.74   | 27.63 | 9.21E-01 |
| cg08995424 | 21.66  | 10.46 | 3.83E-02 | 14.33  | 12.64 | 2.57E-01 | -15.99  | 45.51  | 7.25E-01 | 55.72  | 37.44 | 1.37E-01 | 45.15  | 24.31 | 6.33E-02 |
| cg04913114 | -7.13  | 3.44  | 3.83E-02 | -7.36  | 7.39  | 3.19E-01 | -0.95   | 11.74  | 9.36E-01 | -7.75  | 4.52  | 8.67E-02 | -8.25  | 10.11 | 4.15E-01 |

|            |        |       |          |        |       |          |         |        |          |        |       |          |        |       |          |
|------------|--------|-------|----------|--------|-------|----------|---------|--------|----------|--------|-------|----------|--------|-------|----------|
| cg19656282 | 10.07  | 4.86  | 3.83E-02 | 21.87  | 13.45 | 1.04E-01 | 8.06    | 16.01  | 6.15E-01 | 8.93   | 7.45  | 2.31E-01 | 7.59   | 8.19  | 3.54E-01 |
| cg04414683 | -40.66 | 19.63 | 3.83E-02 | -64.08 | 26.23 | 1.46E-02 | -15.33  | 84.53  | 8.56E-01 | 31.97  | 51.27 | 5.33E-01 | -36.04 | 40.12 | 3.69E-01 |
| cg19098437 | -16.49 | 7.96  | 3.83E-02 | -41.11 | 19.41 | 3.41E-02 | 0.36    | 39.46  | 9.93E-01 | -15.47 | 9.67  | 1.10E-01 | 8.02   | 23.70 | 7.35E-01 |
| cg17365367 | -22.14 | 10.69 | 3.84E-02 | -5.52  | 22.83 | 8.09E-01 | 6.02    | 46.17  | 8.96E-01 | -29.37 | 13.61 | 3.09E-02 | -28.40 | 32.22 | 3.78E-01 |
| cg15108645 | -22.93 | 11.07 | 3.84E-02 | -7.56  | 11.87 | 5.24E-01 | -6.14   | 13.95  | 6.60E-01 | -30.05 | 15.50 | 5.25E-02 | -56.83 | 17.37 | 1.07E-03 |
| cg25840173 | -11.87 | 5.73  | 3.84E-02 | -24.26 | 9.53  | 1.09E-02 | -10.03  | 12.41  | 4.19E-01 | -1.92  | 6.05  | 7.51E-01 | -18.31 | 10.92 | 9.34E-02 |
| cg19847244 | -10.54 | 5.09  | 3.84E-02 | -23.13 | 10.67 | 3.01E-02 | -4.14   | 18.24  | 8.20E-01 | -4.49  | 4.86  | 3.56E-01 | -20.67 | 12.12 | 8.80E-02 |
| cg15726532 | 48.15  | 23.25 | 3.84E-02 | 107.45 | 48.95 | 2.82E-02 | -246.69 | 202.90 | 2.24E-01 | 41.80  | 18.29 | 2.23E-02 | 31.47  | 47.81 | 5.10E-01 |
| cg03022541 | -15.72 | 7.59  | 3.84E-02 | -31.16 | 12.00 | 9.43E-03 | -13.54  | 14.46  | 3.49E-01 | -18.48 | 18.55 | 3.19E-01 | 1.80   | 13.11 | 8.91E-01 |
| cg07678266 | 12.48  | 6.03  | 3.84E-02 | 3.06   | 6.63  | 6.45E-01 | 32.68   | 14.88  | 2.81E-02 | 15.33  | 14.43 | 2.88E-01 | 16.45  | 10.32 | 1.11E-01 |
| cg00509766 | -17.86 | 8.63  | 3.84E-02 | 3.46   | 23.13 | 8.81E-01 | -43.30  | 30.74  | 1.59E-01 | -22.37 | 10.19 | 2.82E-02 | 16.44  | 33.56 | 6.24E-01 |
| cg23369748 | 11.28  | 5.45  | 3.84E-02 | 9.37   | 10.17 | 3.57E-01 | 0.31    | 14.73  | 9.83E-01 | 12.63  | 7.89  | 1.09E-01 | 25.49  | 17.30 | 1.41E-01 |
| cg15971879 | 9.51   | 4.59  | 3.84E-02 | 9.99   | 6.56  | 1.28E-01 | 16.08   | 10.33  | 1.19E-01 | -0.39  | 10.79 | 9.71E-01 | 11.48  | 12.65 | 3.64E-01 |
| cg01338084 | 25.15  | 12.15 | 3.84E-02 | 30.57  | 16.91 | 7.07E-02 | 23.32   | 102.45 | 8.20E-01 | 54.22  | 93.96 | 5.64E-01 | 17.98  | 18.04 | 3.19E-01 |
| cg14595922 | 5.74   | 2.77  | 3.84E-02 | 3.16   | 4.29  | 4.62E-01 | 7.32    | 5.34   | 1.70E-01 | 15.70  | 9.13  | 8.54E-02 | 4.52   | 5.89  | 4.42E-01 |
| cg07251128 | -14.09 | 6.81  | 3.84E-02 | -4.36  | 20.02 | 8.28E-01 | -42.15  | 31.59  | 1.82E-01 | -12.82 | 7.77  | 9.92E-02 | -25.31 | 25.47 | 3.20E-01 |
| cg15161177 | 28.99  | 14.00 | 3.84E-02 | 31.07  | 17.29 | 7.23E-02 | 28.68   | 64.62  | 6.57E-01 | 98.49  | 69.69 | 1.58E-01 | 12.82  | 27.62 | 6.43E-01 |
| cg17591985 | -19.75 | 9.54  | 3.84E-02 | -43.96 | 14.89 | 3.16E-03 | 16.98   | 31.10  | 5.85E-01 | -13.07 | 6.59  | 4.73E-02 | -21.14 | 19.57 | 2.80E-01 |
| cg05568930 | 7.38   | 3.56  | 3.84E-02 | 8.85   | 4.63  | 5.56E-02 | 13.83   | 8.62   | 1.09E-01 | -3.66  | 12.07 | 7.62E-01 | 0.53   | 9.24  | 9.54E-01 |
| cg13777717 | 16.24  | 7.84  | 3.84E-02 | 25.99  | 16.76 | 1.21E-01 | 35.86   | 20.92  | 8.65E-02 | 8.31   | 12.10 | 4.92E-01 | 9.14   | 16.70 | 5.84E-01 |
| cg16642695 | -10.10 | 4.88  | 3.84E-02 | -3.43  | 8.35  | 6.81E-01 | -17.61  | 11.65  | 1.31E-01 | -6.17  | 9.58  | 5.20E-01 | -18.89 | 10.29 | 6.64E-02 |
| cg00420246 | -13.19 | 6.37  | 3.84E-02 | -0.96  | 17.62 | 9.57E-01 | -38.51  | 39.78  | 3.33E-01 | -13.58 | 7.23  | 6.03E-02 | -23.00 | 24.75 | 3.53E-01 |
| cg05096634 | -25.63 | 12.38 | 3.84E-02 | -26.35 | 17.93 | 1.42E-01 | -39.74  | 33.71  | 2.38E-01 | -8.92  | 27.76 | 7.48E-01 | -31.29 | 28.39 | 2.70E-01 |
| cg12194336 | 10.45  | 5.05  | 3.84E-02 | 10.99  | 7.41  | 1.38E-01 | 10.16   | 14.82  | 4.93E-01 | 16.84  | 11.46 | 1.42E-01 | 4.01   | 10.59 | 7.05E-01 |
| cg00865518 | 20.64  | 9.97  | 3.84E-02 | 34.30  | 18.92 | 6.98E-02 | 18.23   | 18.63  | 3.28E-01 | -0.27  | 19.47 | 9.89E-01 | 34.27  | 23.87 | 1.51E-01 |
| cg15055773 | -9.43  | 4.55  | 3.84E-02 | -10.88 | 7.64  | 1.54E-01 | -12.35  | 11.08  | 2.65E-01 | -0.45  | 9.21  | 9.61E-01 | -14.57 | 9.48  | 1.24E-01 |
| cg07022289 | -13.98 | 6.75  | 3.84E-02 | -9.71  | 19.81 | 6.24E-01 | 11.26   | 29.05  | 6.98E-01 | -17.21 | 7.65  | 2.46E-02 | -1.41  | 29.58 | 9.62E-01 |
| cg14483431 | 9.90   | 4.78  | 3.84E-02 | 1.61   | 5.38  | 7.65E-01 | 20.97   | 9.10   | 2.12E-02 | 18.31  | 12.06 | 1.29E-01 | 9.81   | 8.11  | 2.26E-01 |
| cg14437551 | -4.44  | 2.14  | 3.84E-02 | -3.61  | 2.70  | 1.81E-01 | -10.09  | 5.94   | 8.97E-02 | -6.47  | 8.36  | 4.39E-01 | -2.44  | 5.13  | 6.34E-01 |
| cg04200627 | -17.11 | 8.26  | 3.84E-02 | -2.53  | 20.94 | 9.04E-01 | 20.19   | 33.27  | 5.44E-01 | -21.87 | 9.86  | 2.65E-02 | -32.44 | 29.28 | 2.68E-01 |
| cg04276508 | 15.44  | 7.46  | 3.84E-02 | 7.21   | 11.70 | 5.38E-01 | 21.05   | 19.38  | 2.77E-01 | 9.55   | 26.46 | 7.18E-01 | 23.59  | 12.33 | 5.57E-02 |
| cg22408108 | -10.81 | 5.22  | 3.84E-02 | -21.22 | 8.66  | 1.43E-02 | -1.17   | 11.26  | 9.18E-01 | -7.35  | 11.82 | 5.34E-01 | -6.22  | 10.98 | 5.71E-01 |
| cg02394701 | 10.58  | 5.11  | 3.84E-02 | 10.13  | 9.00  | 2.60E-01 | 24.33   | 19.80  | 2.19E-01 | 12.43  | 8.33  | 1.36E-01 | 4.33   | 10.54 | 6.81E-01 |
| cg24546928 | 18.90  | 9.13  | 3.84E-02 | 22.84  | 15.73 | 1.47E-01 | 9.31    | 18.70  | 6.19E-01 | 24.51  | 16.77 | 1.44E-01 | 13.43  | 25.42 | 5.97E-01 |
| cg16273215 | -39.51 | 19.08 | 3.84E-02 | -42.22 | 22.41 | 5.95E-02 | -56.50  | 171.50 | 7.42E-01 | -70.30 | 20.47 | 5.94E-04 | 8.48   | 28.70 | 7.68E-01 |

|            |        |       |          |        |       |          |         |        |          |        |        |          |        |       |          |
|------------|--------|-------|----------|--------|-------|----------|---------|--------|----------|--------|--------|----------|--------|-------|----------|
| cg07685786 | 8.46   | 4.08  | 3.85E-02 | 7.61   | 5.98  | 2.03E-01 | 8.56    | 9.81   | 3.83E-01 | 11.96  | 8.99   | 1.84E-01 | 6.21   | 10.45 | 5.53E-01 |
| cg08263140 | -12.40 | 5.99  | 3.85E-02 | -16.89 | 11.60 | 1.46E-01 | -4.84   | 11.69  | 6.79E-01 | -12.11 | 11.12  | 2.76E-01 | -17.21 | 14.08 | 2.22E-01 |
| cg02826685 | 17.20  | 8.31  | 3.85E-02 | 26.37  | 22.08 | 2.32E-01 | 4.90    | 22.02  | 8.24E-01 | 15.32  | 10.41  | 1.41E-01 | 37.83  | 29.41 | 1.98E-01 |
| cg19007269 | 18.41  | 8.89  | 3.85E-02 | 34.65  | 9.17  | 1.57E-04 | 9.47    | 15.22  | 5.34E-01 | 25.17  | 16.45  | 1.26E-01 | 0.58   | 11.74 | 9.61E-01 |
| cg26601559 | -20.35 | 9.83  | 3.85E-02 | -37.05 | 15.22 | 1.49E-02 | 6.64    | 27.68  | 8.10E-01 | -10.21 | 7.75   | 1.88E-01 | -44.03 | 22.90 | 5.45E-02 |
| cg24348330 | -7.33  | 3.54  | 3.85E-02 | -6.00  | 6.42  | 3.50E-01 | 2.55    | 9.51   | 7.89E-01 | -11.84 | 5.50   | 3.13E-02 | -6.65  | 9.38  | 4.78E-01 |
| cg05279864 | -12.52 | 6.05  | 3.85E-02 | -18.33 | 11.79 | 1.20E-01 | -19.82  | 14.90  | 1.83E-01 | -4.96  | 9.80   | 6.13E-01 | -13.30 | 13.84 | 3.36E-01 |
| cg26123920 | -42.14 | 20.36 | 3.85E-02 | -43.65 | 25.64 | 8.87E-02 | 58.09   | 105.66 | 5.82E-01 | -50.88 | 67.42  | 4.50E-01 | -50.28 | 41.43 | 2.25E-01 |
| cg04892724 | -14.89 | 7.20  | 3.85E-02 | -17.82 | 10.76 | 9.76E-02 | -3.77   | 22.62  | 8.68E-01 | -24.66 | 16.73  | 1.40E-01 | -7.42  | 13.94 | 5.95E-01 |
| cg06068801 | 9.53   | 4.61  | 3.85E-02 | 11.75  | 6.17  | 5.67E-02 | 13.05   | 10.41  | 2.10E-01 | 1.48   | 14.18  | 9.17E-01 | 1.90   | 12.27 | 8.77E-01 |
| cg02550231 | 17.35  | 8.38  | 3.85E-02 | 19.56  | 24.48 | 4.24E-01 | 14.73   | 44.03  | 7.38E-01 | 19.12  | 9.95   | 5.46E-02 | 6.91   | 22.77 | 7.62E-01 |
| cg02219476 | -15.34 | 7.41  | 3.85E-02 | -34.49 | 11.72 | 3.25E-03 | -1.24   | 17.13  | 9.42E-01 | -7.19  | 4.95   | 1.46E-01 | -21.82 | 14.44 | 1.31E-01 |
| cg26516499 | 18.80  | 9.08  | 3.85E-02 | 41.77  | 17.90 | 1.96E-02 | -5.70   | 24.15  | 8.14E-01 | 13.99  | 12.75  | 2.72E-01 | 18.71  | 29.78 | 5.30E-01 |
| cg23673107 | 13.34  | 6.45  | 3.85E-02 | 7.82   | 9.74  | 4.22E-01 | 42.47   | 19.19  | 2.69E-02 | 14.65  | 13.02  | 2.60E-01 | 7.52   | 14.27 | 5.98E-01 |
| cg23820661 | 19.99  | 9.66  | 3.85E-02 | 16.35  | 25.57 | 5.23E-01 | -63.51  | 124.92 | 6.11E-01 | 23.44  | 10.91  | 3.17E-02 | -4.62  | 36.87 | 9.00E-01 |
| cg03170056 | 24.16  | 11.67 | 3.85E-02 | 31.24  | 14.31 | 2.91E-02 | 11.89   | 41.55  | 7.75E-01 | -5.03  | 38.76  | 8.97E-01 | 17.54  | 28.71 | 5.41E-01 |
| cg11970797 | -6.82  | 3.30  | 3.85E-02 | -4.45  | 4.65  | 3.39E-01 | -16.06  | 7.76   | 3.86E-02 | -2.75  | 8.36   | 7.42E-01 | -7.79  | 8.17  | 3.41E-01 |
| cg23365905 | 13.64  | 6.59  | 3.85E-02 | 7.94   | 16.38 | 6.28E-01 | -0.01   | 35.52  | 1.00E+00 | 12.53  | 7.86   | 1.11E-01 | 35.23  | 20.75 | 8.96E-02 |
| cg11385042 | -14.02 | 6.78  | 3.85E-02 | -14.99 | 17.98 | 4.04E-01 | -18.24  | 34.31  | 5.95E-01 | -15.70 | 7.91   | 4.73E-02 | 3.74   | 23.09 | 8.71E-01 |
| cg03930970 | 17.46  | 8.44  | 3.85E-02 | 19.65  | 23.13 | 3.95E-01 | 43.47   | 36.64  | 2.36E-01 | 15.36  | 9.76   | 1.16E-01 | 15.95  | 32.67 | 6.25E-01 |
| cg23162479 | -9.71  | 4.69  | 3.85E-02 | -9.93  | 7.51  | 1.86E-01 | -4.56   | 10.54  | 6.65E-01 | -6.33  | 9.63   | 5.11E-01 | -19.73 | 11.26 | 7.98E-02 |
| cg15131371 | 10.95  | 5.29  | 3.85E-02 | 9.79   | 7.88  | 2.14E-01 | -22.60  | 26.94  | 4.02E-01 | 17.67  | 6.51   | 6.67E-03 | -2.55  | 15.04 | 8.65E-01 |
| cg17668731 | 10.46  | 5.05  | 3.85E-02 | 13.51  | 7.69  | 7.90E-02 | 15.57   | 11.27  | 1.67E-01 | 12.87  | 11.99  | 2.83E-01 | -4.19  | 11.61 | 7.18E-01 |
| cg07563400 | 9.19   | 4.44  | 3.85E-02 | 14.65  | 6.49  | 2.39E-02 | 2.71    | 12.37  | 8.27E-01 | 8.28   | 9.33   | 3.75E-01 | 0.59   | 10.56 | 9.56E-01 |
| cg06395056 | 14.73  | 7.12  | 3.85E-02 | 33.84  | 18.21 | 6.31E-02 | 8.95    | 20.54  | 6.63E-01 | 14.09  | 8.75   | 1.07E-01 | -12.83 | 27.80 | 6.44E-01 |
| cg14527029 | 10.41  | 5.03  | 3.85E-02 | 10.56  | 6.41  | 9.97E-02 | 18.90   | 9.99   | 5.84E-02 | -10.23 | 13.24  | 4.40E-01 | 15.70  | 12.56 | 2.11E-01 |
| cg14305763 | 37.22  | 17.98 | 3.85E-02 | 42.64  | 22.27 | 5.56E-02 | -78.38  | 80.68  | 3.31E-01 | 31.59  | 77.51  | 6.84E-01 | 47.48  | 36.37 | 1.92E-01 |
| cg26643914 | -10.86 | 5.25  | 3.85E-02 | -12.79 | 8.91  | 1.51E-01 | -10.51  | 12.08  | 3.85E-01 | -3.75  | 9.55   | 6.94E-01 | -20.28 | 12.99 | 1.18E-01 |
| cg21689812 | -31.18 | 15.07 | 3.85E-02 | -26.12 | 26.66 | 3.27E-01 | -173.24 | 194.16 | 3.72E-01 | -34.48 | 19.95  | 8.39E-02 | -20.35 | 46.71 | 6.63E-01 |
| cg07710328 | -9.77  | 4.72  | 3.85E-02 | -13.21 | 7.06  | 6.14E-02 | -0.43   | 13.40  | 9.74E-01 | -5.86  | 9.00   | 5.15E-01 | -14.27 | 12.02 | 2.35E-01 |
| cg03597491 | 10.03  | 4.85  | 3.85E-02 | 14.06  | 6.85  | 4.01E-02 | 4.40    | 12.13  | 7.17E-01 | 14.88  | 10.89  | 1.72E-01 | -4.67  | 12.88 | 7.17E-01 |
| cg01277910 | 125.01 | 60.41 | 3.85E-02 | 157.90 | 81.61 | 5.30E-02 | 390.16  | 168.04 | 2.02E-02 | 96.89  | 113.73 | 3.94E-01 | 25.59  | 78.02 | 7.43E-01 |
| cg25004838 | 17.60  | 8.51  | 3.85E-02 | 14.52  | 11.91 | 2.23E-01 | 37.49   | 18.90  | 4.73E-02 | 3.60   | 30.70  | 9.07E-01 | 11.04  | 18.55 | 5.52E-01 |
| cg07507251 | -6.61  | 3.19  | 3.85E-02 | -4.76  | 4.74  | 3.16E-01 | -11.20  | 7.90   | 1.56E-01 | -6.21  | 6.94   | 3.71E-01 | -7.60  | 7.71  | 3.24E-01 |
| cg09497201 | 12.04  | 5.82  | 3.85E-02 | -0.29  | 11.21 | 9.79E-01 | 12.60   | 13.96  | 3.67E-01 | 12.26  | 10.35  | 2.36E-01 | 25.09  | 11.84 | 3.41E-02 |

|            |        |       |          |        |       |          |         |        |          |         |       |          |        |       |          |
|------------|--------|-------|----------|--------|-------|----------|---------|--------|----------|---------|-------|----------|--------|-------|----------|
| cg16875169 | 39.30  | 19.00 | 3.85E-02 | 54.19  | 52.78 | 3.05E-01 | 28.46   | 276.65 | 9.18E-01 | 38.65   | 21.33 | 7.00E-02 | 20.63  | 70.52 | 7.70E-01 |
| cg17634572 | -9.32  | 4.50  | 3.85E-02 | -18.18 | 6.95  | 8.90E-03 | -7.46   | 12.40  | 5.48E-01 | -0.75   | 6.10  | 9.02E-01 | -12.82 | 9.39  | 1.72E-01 |
| cg02103875 | -9.12  | 4.41  | 3.85E-02 | -11.14 | 9.69  | 2.50E-01 | -26.97  | 21.56  | 2.11E-01 | -9.22   | 5.52  | 9.51E-02 | 1.60   | 13.02 | 9.02E-01 |
| cg01024458 | -10.77 | 5.21  | 3.85E-02 | -1.42  | 13.55 | 9.16E-01 | -8.97   | 34.94  | 7.97E-01 | -12.02  | 6.06  | 4.74E-02 | -16.17 | 17.09 | 3.44E-01 |
| cg21828899 | 34.75  | 16.80 | 3.85E-02 | 35.00  | 47.56 | 4.62E-01 | -59.80  | 205.92 | 7.72E-01 | 41.61   | 18.84 | 2.72E-02 | -31.28 | 61.95 | 6.14E-01 |
| cg27138949 | -8.90  | 4.30  | 3.85E-02 | -7.71  | 8.42  | 3.60E-01 | -1.17   | 10.87  | 9.15E-01 | -8.61   | 6.73  | 2.01E-01 | -18.35 | 10.32 | 7.53E-02 |
| cg06378498 | -19.12 | 9.24  | 3.86E-02 | -26.08 | 13.52 | 5.38E-02 | -43.15  | 23.11  | 6.18E-02 | -3.11   | 22.09 | 8.88E-01 | 2.54   | 20.75 | 9.03E-01 |
| cg16578267 | 20.79  | 10.05 | 3.86E-02 | 42.64  | 17.70 | 1.60E-02 | -3.17   | 19.23  | 8.69E-01 | 27.59   | 16.53 | 9.52E-02 | 9.08   | 21.15 | 6.68E-01 |
| cg03901836 | -13.89 | 6.71  | 3.86E-02 | -12.45 | 14.81 | 4.00E-01 | -59.81  | 26.07  | 2.18E-02 | -9.00   | 7.22  | 2.13E-01 | -13.82 | 13.30 | 2.99E-01 |
| cg20471927 | -33.52 | 16.20 | 3.86E-02 | -33.02 | 23.13 | 1.53E-01 | 1.75    | 41.80  | 9.67E-01 | -101.67 | 45.94 | 2.69E-02 | -21.92 | 32.02 | 4.94E-01 |
| cg06250904 | 32.61  | 15.76 | 3.86E-02 | 52.33  | 18.26 | 4.16E-03 | -6.82   | 74.47  | 9.27E-01 | 46.82   | 61.54 | 4.47E-01 | -3.04  | 27.07 | 9.11E-01 |
| cg17797863 | 7.09   | 3.43  | 3.86E-02 | 4.87   | 4.77  | 3.07E-01 | 7.46    | 7.10   | 2.93E-01 | 16.87   | 9.56  | 7.75E-02 | 5.46   | 9.78  | 5.76E-01 |
| cg03371894 | -21.56 | 10.42 | 3.86E-02 | -23.86 | 22.26 | 2.84E-01 | -8.61   | 51.43  | 8.67E-01 | -26.65  | 13.06 | 4.13E-02 | 9.70   | 32.53 | 7.66E-01 |
| cg10480239 | 8.43   | 4.08  | 3.86E-02 | 10.63  | 5.60  | 5.76E-02 | 11.58   | 9.65   | 2.30E-01 | -1.33   | 10.95 | 9.03E-01 | 5.97   | 10.39 | 5.66E-01 |
| cg06611768 | -5.48  | 2.65  | 3.86E-02 | -5.88  | 3.91  | 1.33E-01 | -6.60   | 7.04   | 3.48E-01 | -1.69   | 6.22  | 7.86E-01 | -7.06  | 5.67  | 2.13E-01 |
| cg01546472 | 19.14  | 9.25  | 3.86E-02 | -1.77  | 18.57 | 9.24E-01 | -0.49   | 41.19  | 9.91E-01 | 27.73   | 11.92 | 2.00E-02 | 29.37  | 29.53 | 3.20E-01 |
| cg16920502 | -8.74  | 4.23  | 3.86E-02 | -10.45 | 6.64  | 1.16E-01 | -10.78  | 9.84   | 2.73E-01 | -10.92  | 9.33  | 2.42E-01 | -1.35  | 9.34  | 8.85E-01 |
| cg21513254 | 5.49   | 2.66  | 3.86E-02 | 4.52   | 3.20  | 1.58E-01 | 9.85    | 6.34   | 1.20E-01 | 3.72    | 12.03 | 7.57E-01 | 5.36   | 8.97  | 5.50E-01 |
| cg07028929 | 16.63  | 8.04  | 3.86E-02 | 14.57  | 11.65 | 2.11E-01 | 4.88    | 19.15  | 7.99E-01 | 48.94   | 31.61 | 1.22E-01 | 20.04  | 15.12 | 1.85E-01 |
| cg02987482 | 6.62   | 3.20  | 3.86E-02 | 6.59   | 4.34  | 1.29E-01 | 9.98    | 7.98   | 2.11E-01 | 12.84   | 8.42  | 1.27E-01 | -2.89  | 8.29  | 7.27E-01 |
| cg16070387 | 18.39  | 8.89  | 3.86E-02 | 11.07  | 17.26 | 5.21E-01 | 6.43    | 17.95  | 7.20E-01 | 22.57   | 15.28 | 1.40E-01 | 41.48  | 22.94 | 7.06E-02 |
| cg15392819 | -16.91 | 8.18  | 3.86E-02 | -33.82 | 21.65 | 1.18E-01 | -6.87   | 26.55  | 7.96E-01 | -14.06  | 9.86  | 1.54E-01 | -23.66 | 29.94 | 4.30E-01 |
| cg11695653 | 22.31  | 10.79 | 3.86E-02 | 11.53  | 37.01 | 7.55E-01 | 239.95  | 162.49 | 1.40E-01 | 25.24   | 11.65 | 3.03E-02 | -25.00 | 46.42 | 5.90E-01 |
| cg22939524 | -63.24 | 30.58 | 3.86E-02 | -75.47 | 49.57 | 1.28E-01 | 103.86  | 209.86 | 6.21E-01 | -46.50  | 57.09 | 4.15E-01 | -75.13 | 54.80 | 1.70E-01 |
| cg02195105 | -7.85  | 3.80  | 3.86E-02 | -6.05  | 8.12  | 4.56E-01 | 2.91    | 23.40  | 9.01E-01 | -7.38   | 4.62  | 1.10E-01 | -20.41 | 13.48 | 1.30E-01 |
| cg08724371 | -24.14 | 11.67 | 3.86E-02 | 3.58   | 19.02 | 8.51E-01 | -22.46  | 29.35  | 4.44E-01 | -26.96  | 9.80  | 5.93E-03 | -67.52 | 29.00 | 1.99E-02 |
| cg07933872 | 15.49  | 7.49  | 3.86E-02 | 19.57  | 20.63 | 3.43E-01 | 38.61   | 37.06  | 2.98E-01 | 11.07   | 8.59  | 1.98E-01 | 43.22  | 28.80 | 1.33E-01 |
| cg07930207 | -9.95  | 4.81  | 3.86E-02 | -11.42 | 14.81 | 4.41E-01 | 18.17   | 27.51  | 5.09E-01 | -7.78   | 5.62  | 1.66E-01 | -27.22 | 13.21 | 3.94E-02 |
| cg00101453 | -32.09 | 15.52 | 3.86E-02 | -75.34 | 48.29 | 1.19E-01 | -44.32  | 227.84 | 8.46E-01 | -33.70  | 17.24 | 5.06E-02 | 39.02  | 54.19 | 4.72E-01 |
| cg10940217 | 35.92  | 17.37 | 3.86E-02 | 55.72  | 49.51 | 2.60E-01 | -141.93 | 160.80 | 3.77E-01 | 40.94   | 19.75 | 3.82E-02 | -10.38 | 57.36 | 8.56E-01 |
| cg04858164 | 4.12   | 1.99  | 3.86E-02 | 3.62   | 2.72  | 1.83E-01 | 9.60    | 4.46   | 3.13E-02 | -0.96   | 4.65  | 8.36E-01 | 5.38   | 6.98  | 4.41E-01 |
| cg11380624 | -9.19  | 4.45  | 3.86E-02 | -8.73  | 5.80  | 1.32E-01 | 0.86    | 9.39   | 9.27E-01 | -2.31   | 12.16 | 8.49E-01 | -20.63 | 7.87  | 8.79E-03 |
| cg04703221 | 5.72   | 2.77  | 3.86E-02 | 5.60   | 3.63  | 1.23E-01 | 9.86    | 7.11   | 1.66E-01 | 4.93    | 7.95  | 5.35E-01 | 2.56   | 7.21  | 7.23E-01 |
| cg02992311 | -9.29  | 4.49  | 3.87E-02 | -7.78  | 7.70  | 3.12E-01 | -2.79   | 8.94   | 7.55E-01 | -18.85  | 8.86  | 3.34E-02 | -7.25  | 11.58 | 5.31E-01 |
| cg16877615 | 5.77   | 2.79  | 3.87E-02 | 6.89   | 4.02  | 8.71E-02 | 3.19    | 5.57   | 5.66E-01 | 8.74    | 10.75 | 4.17E-01 | 5.31   | 6.20  | 3.92E-01 |

|                  |        |       |          |        |       |          |         |        |          |        |       |          |         |       |          |
|------------------|--------|-------|----------|--------|-------|----------|---------|--------|----------|--------|-------|----------|---------|-------|----------|
| cg14880257       | 18.50  | 8.95  | 3.87E-02 | 27.55  | 20.42 | 1.77E-01 | 36.84   | 22.59  | 1.03E-01 | 12.15  | 11.89 | 3.07E-01 | 6.49    | 30.73 | 8.33E-01 |
| cg05888037       | -11.39 | 5.51  | 3.87E-02 | -14.96 | 9.02  | 9.75E-02 | -4.04   | 13.57  | 7.66E-01 | -4.39  | 11.42 | 7.01E-01 | -17.97  | 11.49 | 1.18E-01 |
| cg13957043       | -8.17  | 3.95  | 3.87E-02 | -11.45 | 7.92  | 1.48E-01 | 8.12    | 11.58  | 4.83E-01 | -12.25 | 5.64  | 2.98E-02 | -2.23   | 10.14 | 8.26E-01 |
| cg06491139       | 17.97  | 8.69  | 3.87E-02 | 28.01  | 15.77 | 7.57E-02 | 7.78    | 18.95  | 6.81E-01 | 13.14  | 14.51 | 3.65E-01 | 24.51   | 24.38 | 3.15E-01 |
| cg09670189       | 19.30  | 9.33  | 3.87E-02 | 19.89  | 11.97 | 9.68E-02 | 43.20   | 46.47  | 3.53E-01 | 32.95  | 41.19 | 4.24E-01 | 12.57   | 17.01 | 4.60E-01 |
| cg11080651       | 10.83  | 5.24  | 3.87E-02 | 14.21  | 7.12  | 4.60E-02 | 9.26    | 14.84  | 5.33E-01 | 12.02  | 14.11 | 3.94E-01 | 1.68    | 11.82 | 8.87E-01 |
| cg07881032       | -8.03  | 3.88  | 3.87E-02 | -2.74  | 3.45  | 4.27E-01 | -6.62   | 5.86   | 2.59E-01 | -24.42 | 7.92  | 2.05E-03 | -6.27   | 5.33  | 2.39E-01 |
| cg19951187       | 31.11  | 15.05 | 3.87E-02 | 62.55  | 39.16 | 1.10E-01 | -178.01 | 144.49 | 2.18E-01 | 27.51  | 17.45 | 1.15E-01 | 34.23   | 48.09 | 4.77E-01 |
| cg20239647       | 18.69  | 9.04  | 3.87E-02 | 19.35  | 16.86 | 2.51E-01 | 2.82    | 30.19  | 9.26E-01 | 20.81  | 14.16 | 1.42E-01 | 20.38   | 19.46 | 2.95E-01 |
| cg26190833       | -14.92 | 7.21  | 3.87E-02 | -21.98 | 20.08 | 2.74E-01 | -14.98  | 28.14  | 5.94E-01 | -17.61 | 8.44  | 3.70E-02 | 23.38   | 26.31 | 3.74E-01 |
| cg02231052       | -14.12 | 6.83  | 3.87E-02 | -18.87 | 10.30 | 6.68E-02 | -10.37  | 13.43  | 4.40E-01 | -12.43 | 20.60 | 5.46E-01 | -9.25   | 15.61 | 5.54E-01 |
| cg07028608       | -42.16 | 20.39 | 3.87E-02 | 2.71   | 69.35 | 9.69E-01 | -134.03 | 347.74 | 7.00E-01 | -40.98 | 22.17 | 6.46E-02 | -112.97 | 80.35 | 1.60E-01 |
| cg24694665       | -8.98  | 4.34  | 3.87E-02 | -19.03 | 8.27  | 2.14E-02 | 4.58    | 10.10  | 6.50E-01 | -6.87  | 5.54  | 2.15E-01 | -13.31  | 9.43  | 1.58E-01 |
| cg25930786       | 5.13   | 2.48  | 3.87E-02 | 3.51   | 3.07  | 2.53E-01 | 13.08   | 6.65   | 4.93E-02 | 4.47   | 7.89  | 5.72E-01 | 5.23    | 7.44  | 4.82E-01 |
| cg23761161       | -15.25 | 7.38  | 3.87E-02 | -3.42  | 11.84 | 7.73E-01 | -35.15  | 21.07  | 9.52E-02 | -14.18 | 14.73 | 3.36E-01 | -25.38  | 15.10 | 9.27E-02 |
| cg07551230       | -11.45 | 5.54  | 3.87E-02 | -21.09 | 9.24  | 2.24E-02 | -6.64   | 12.59  | 5.98E-01 | -5.32  | 11.29 | 6.37E-01 | -6.30   | 12.20 | 6.06E-01 |
| cg13668306       | -15.10 | 7.30  | 3.87E-02 | -24.65 | 9.55  | 9.84E-03 | 11.71   | 14.22  | 4.11E-01 | -19.46 | 11.71 | 9.67E-02 | -19.13  | 11.55 | 9.77E-02 |
| cg27653370       | 18.37  | 8.89  | 3.87E-02 | 14.81  | 18.47 | 4.23E-01 | 10.98   | 18.94  | 5.62E-01 | 22.65  | 14.27 | 1.12E-01 | 23.30   | 22.19 | 2.94E-01 |
| cg22559034       | 15.70  | 7.59  | 3.87E-02 | 6.87   | 9.91  | 4.88E-01 | 42.27   | 17.49  | 1.56E-02 | 7.72   | 25.22 | 7.60E-01 | 17.32   | 15.20 | 2.54E-01 |
| cg05967123       | 23.97  | 11.60 | 3.87E-02 | 21.31  | 13.86 | 1.24E-01 | 53.34   | 74.95  | 4.77E-01 | 7.11   | 39.07 | 8.56E-01 | 38.11   | 26.78 | 1.55E-01 |
| cg10894483       | 11.20  | 5.42  | 3.87E-02 | 18.98  | 11.44 | 9.71E-02 | 5.96    | 16.08  | 7.11E-01 | 15.83  | 9.14  | 8.33E-02 | 2.28    | 9.70  | 8.14E-01 |
| cg23091549       | -13.55 | 6.56  | 3.87E-02 | 5.74   | 19.97 | 7.74E-01 | -9.40   | 36.80  | 7.98E-01 | -16.49 | 7.29  | 2.37E-02 | -10.37  | 28.88 | 7.20E-01 |
| cg11410080       | -10.02 | 4.85  | 3.87E-02 | -16.65 | 8.92  | 6.18E-02 | -5.64   | 12.33  | 6.47E-01 | -7.71  | 7.05  | 2.74E-01 | -7.49   | 17.44 | 6.68E-01 |
| cg02968094       | -6.11  | 2.96  | 3.87E-02 | -10.82 | 5.35  | 4.30E-02 | -5.89   | 6.33   | 3.52E-01 | -2.64  | 5.16  | 6.09E-01 | -4.40   | 7.68  | 5.66E-01 |
| cg15840005       | 14.97  | 7.24  | 3.87E-02 | 22.43  | 12.08 | 6.33E-02 | 1.33    | 13.75  | 9.23E-01 | 18.07  | 18.96 | 3.41E-01 | 17.97   | 15.54 | 2.48E-01 |
| cg01232037       | -10.27 | 4.97  | 3.87E-02 | -13.61 | 10.53 | 1.96E-01 | -8.83   | 12.57  | 4.82E-01 | -7.95  | 6.87  | 2.47E-01 | -17.25  | 15.81 | 2.75E-01 |
| cg12694021       | 11.87  | 5.74  | 3.87E-02 | 4.84   | 9.23  | 6.00E-01 | 22.42   | 15.69  | 1.53E-01 | 19.11  | 10.19 | 6.07E-02 | 5.72    | 14.26 | 6.88E-01 |
| cg27508620       | -5.30  | 2.57  | 3.87E-02 | -3.12  | 4.84  | 5.19E-01 | -7.43   | 5.75   | 1.96E-01 | -7.27  | 4.14  | 7.89E-02 | -1.12   | 6.97  | 8.73E-01 |
| cg05087455       | 10.29  | 4.98  | 3.87E-02 | 13.27  | 7.24  | 6.69E-02 | 14.84   | 13.02  | 2.54E-01 | 13.43  | 10.63 | 2.07E-01 | -6.80   | 12.39 | 5.83E-01 |
| cg15244223       | 20.74  | 10.04 | 3.87E-02 | 39.61  | 30.77 | 1.98E-01 | -34.11  | 50.86  | 5.02E-01 | 26.38  | 12.05 | 2.86E-02 | -2.72   | 24.99 | 9.13E-01 |
| cg26243376       | -9.92  | 4.80  | 3.88E-02 | -12.25 | 6.15  | 4.63E-02 | -0.14   | 13.91  | 9.92E-01 | -15.80 | 31.44 | 6.15E-01 | -8.33   | 9.63  | 3.87E-01 |
| cg03004350       | 7.17   | 3.47  | 3.88E-02 | 6.67   | 4.46  | 1.34E-01 | 12.01   | 8.31   | 1.48E-01 | 1.90   | 10.57 | 8.58E-01 | 7.35    | 10.31 | 4.76E-01 |
| cg03502982       | 11.48  | 5.56  | 3.88E-02 | 11.27  | 7.43  | 1.29E-01 | 27.60   | 13.46  | 4.04E-02 | 13.48  | 19.46 | 4.88E-01 | -3.28   | 12.78 | 7.97E-01 |
| cg08468772       | 16.57  | 8.02  | 3.88E-02 | 34.49  | 17.33 | 4.65E-02 | 7.93    | 17.75  | 6.55E-01 | 16.45  | 11.78 | 1.63E-01 | -0.46   | 23.30 | 9.84E-01 |
| ch.11.130409386F | -29.86 | 14.45 | 3.88E-02 | -39.89 | 19.32 | 3.90E-02 | 23.38   | 47.28  | 6.21E-01 | 11.60  | 68.15 | 8.65E-01 | -33.94  | 26.27 | 1.96E-01 |

|            |        |       |          |         |       |          |         |        |          |        |       |          |         |       |          |
|------------|--------|-------|----------|---------|-------|----------|---------|--------|----------|--------|-------|----------|---------|-------|----------|
| cg19633390 | 12.75  | 6.17  | 3.88E-02 | 7.24    | 13.57 | 5.94E-01 | 5.45    | 20.99  | 7.95E-01 | 17.70  | 7.86  | 2.44E-02 | -1.17   | 20.33 | 9.54E-01 |
| cg20984085 | -32.71 | 15.83 | 3.88E-02 | -23.35  | 18.49 | 2.07E-01 | -85.81  | 110.21 | 4.36E-01 | -60.75 | 57.97 | 2.95E-01 | -54.03  | 38.13 | 1.57E-01 |
| cg07538372 | -14.52 | 7.03  | 3.88E-02 | -9.98   | 21.79 | 6.47E-01 | 10.42   | 28.10  | 7.11E-01 | -16.31 | 8.00  | 4.14E-02 | -25.06  | 28.27 | 3.75E-01 |
| cg13630114 | -8.62  | 4.17  | 3.88E-02 | -7.05   | 10.53 | 5.03E-01 | -7.45   | 16.88  | 6.59E-01 | -11.51 | 4.98  | 2.08E-02 | 12.88   | 14.81 | 3.84E-01 |
| cg26910867 | -16.88 | 8.17  | 3.88E-02 | -13.82  | 23.65 | 5.59E-01 | -34.85  | 91.08  | 7.02E-01 | -15.69 | 8.97  | 8.03E-02 | -44.34  | 38.97 | 2.55E-01 |
| cg18129805 | -6.68  | 3.23  | 3.88E-02 | -1.16   | 4.67  | 8.04E-01 | -8.72   | 6.46   | 1.77E-01 | -9.50  | 11.25 | 3.98E-01 | -15.19  | 6.95  | 2.89E-02 |
| cg05149213 | 7.43   | 3.60  | 3.88E-02 | 7.12    | 5.07  | 1.60E-01 | 7.59    | 7.74   | 3.26E-01 | 9.24   | 12.54 | 4.61E-01 | 7.28    | 8.06  | 3.66E-01 |
| cg23241141 | -16.57 | 8.02  | 3.88E-02 | -32.52  | 18.43 | 7.76E-02 | 4.72    | 36.68  | 8.98E-01 | -10.49 | 10.23 | 3.05E-01 | -28.32  | 20.85 | 1.74E-01 |
| cg19852958 | 14.09  | 6.82  | 3.88E-02 | 39.85   | 16.54 | 1.60E-02 | 12.90   | 20.34  | 5.26E-01 | 12.97  | 6.71  | 5.33E-02 | -1.32   | 13.86 | 9.24E-01 |
| cg14051770 | -12.71 | 6.15  | 3.88E-02 | -9.52   | 8.20  | 2.45E-01 | -22.10  | 12.55  | 7.82E-02 | 4.84   | 12.97 | 7.09E-01 | -25.88  | 12.43 | 3.74E-02 |
| cg25387309 | 15.49  | 7.49  | 3.88E-02 | 42.99   | 21.42 | 4.47E-02 | 21.33   | 38.43  | 5.79E-01 | 10.00  | 8.50  | 2.39E-01 | 26.53   | 30.20 | 3.80E-01 |
| cg05493394 | 28.88  | 13.98 | 3.88E-02 | 20.47   | 20.79 | 3.25E-01 | -8.04   | 57.88  | 8.89E-01 | 46.76  | 30.86 | 1.30E-01 | 36.92   | 26.20 | 1.59E-01 |
| cg15026574 | -11.28 | 5.46  | 3.88E-02 | -14.81  | 13.83 | 2.84E-01 | 22.89   | 29.53  | 4.38E-01 | -13.96 | 6.26  | 2.58E-02 | 17.25   | 24.48 | 4.81E-01 |
| cg07296661 | -13.38 | 6.47  | 3.88E-02 | -3.74   | 17.16 | 8.28E-01 | -2.34   | 35.27  | 9.47E-01 | -14.48 | 7.47  | 5.26E-02 | -25.93  | 23.98 | 2.80E-01 |
| cg23969559 | -25.77 | 12.47 | 3.88E-02 | -30.20  | 36.40 | 4.07E-01 | 101.42  | 117.30 | 3.87E-01 | -26.08 | 13.99 | 6.23E-02 | -34.40  | 44.88 | 4.43E-01 |
| cg22012981 | 15.03  | 7.27  | 3.88E-02 | 7.81    | 11.59 | 5.00E-01 | 31.48   | 13.45  | 1.92E-02 | 18.03  | 19.93 | 3.66E-01 | 1.91    | 17.12 | 9.11E-01 |
| cg04677622 | -10.62 | 5.14  | 3.88E-02 | -20.65  | 11.39 | 6.98E-02 | 13.75   | 23.18  | 5.53E-01 | -9.06  | 6.37  | 1.55E-01 | -12.41  | 16.64 | 4.56E-01 |
| cg07782221 | -10.50 | 5.08  | 3.88E-02 | -11.22  | 8.28  | 1.75E-01 | -11.14  | 11.80  | 3.45E-01 | -3.13  | 10.99 | 7.76E-01 | -15.81  | 10.74 | 1.41E-01 |
| cg05316555 | 26.34  | 12.75 | 3.88E-02 | 32.33   | 30.83 | 2.94E-01 | 143.41  | 138.29 | 3.00E-01 | 28.57  | 14.78 | 5.32E-02 | -21.86  | 46.18 | 6.36E-01 |
| cg06616055 | 8.58   | 4.15  | 3.88E-02 | 11.35   | 8.62  | 1.88E-01 | 7.81    | 12.50  | 5.32E-01 | 7.84   | 5.35  | 1.43E-01 | 6.51    | 17.69 | 7.13E-01 |
| cg20963592 | -94.00 | 45.50 | 3.88E-02 | -54.60  | 73.86 | 4.60E-01 | -608.89 | 304.03 | 4.52E-02 | -57.98 | 27.04 | 3.20E-02 | -168.35 | 76.74 | 2.82E-02 |
| cg12831102 | 26.97  | 13.06 | 3.88E-02 | 10.61   | 40.56 | 7.94E-01 | 49.40   | 173.73 | 7.76E-01 | 27.47  | 14.38 | 5.60E-02 | 44.56   | 50.85 | 3.81E-01 |
| cg19741148 | -21.03 | 10.18 | 3.88E-02 | -22.08  | 14.19 | 1.20E-01 | 4.49    | 28.49  | 8.75E-01 | -19.79 | 22.73 | 3.84E-01 | -39.84  | 25.65 | 1.20E-01 |
| cg03108373 | -7.38  | 3.57  | 3.88E-02 | -8.27   | 6.52  | 2.05E-01 | -13.65  | 11.58  | 2.39E-01 | -4.59  | 5.29  | 3.86E-01 | -10.10  | 9.23  | 2.74E-01 |
| cg12689803 | -6.53  | 3.16  | 3.88E-02 | -6.10   | 4.90  | 2.14E-01 | -2.61   | 7.46   | 7.26E-01 | -10.85 | 8.40  | 1.97E-01 | -7.55   | 6.15  | 2.19E-01 |
| cg01994190 | 9.17   | 4.44  | 3.88E-02 | 11.72   | 6.06  | 5.31E-02 | 19.71   | 14.28  | 1.68E-01 | 2.78   | 10.06 | 7.82E-01 | 2.55    | 10.67 | 8.11E-01 |
| cg10121219 | -12.46 | 6.03  | 3.88E-02 | -5.94   | 16.14 | 7.13E-01 | -19.80  | 22.91  | 3.88E-01 | -12.78 | 7.20  | 7.60E-02 | -14.42  | 20.09 | 4.73E-01 |
| cg09813400 | 11.04  | 5.35  | 3.88E-02 | 9.56    | 7.11  | 1.78E-01 | 22.96   | 13.39  | 8.65E-02 | 16.56  | 17.79 | 3.52E-01 | 2.60    | 12.44 | 8.34E-01 |
| cg00679556 | -12.16 | 5.89  | 3.88E-02 | 2.87    | 14.82 | 8.46E-01 | -2.78   | 18.74  | 8.82E-01 | -14.83 | 7.60  | 5.11E-02 | -23.98  | 15.52 | 1.22E-01 |
| cg12210543 | 5.13   | 2.48  | 3.88E-02 | 0.83    | 4.14  | 8.40E-01 | 13.10   | 5.69   | 2.14E-02 | 5.37   | 4.03  | 1.83E-01 | 4.30    | 8.17  | 5.99E-01 |
| cg11113536 | -6.95  | 3.37  | 3.88E-02 | -16.50  | 8.29  | 4.65E-02 | -0.31   | 13.15  | 9.81E-01 | -4.81  | 4.17  | 2.49E-01 | -9.14   | 9.80  | 3.51E-01 |
| cg20393609 | -56.94 | 27.56 | 3.88E-02 | -110.38 | 76.50 | 1.49E-01 | 66.57   | 347.07 | 8.48E-01 | -57.23 | 31.47 | 6.89E-02 | 9.07    | 88.62 | 9.19E-01 |
| cg08509236 | 10.92  | 5.28  | 3.88E-02 | 6.76    | 7.33  | 3.56E-01 | 6.97    | 13.32  | 6.01E-01 | 33.18  | 38.09 | 3.84E-01 | 18.69   | 9.60  | 5.14E-02 |
| cg13185177 | 6.62   | 3.20  | 3.88E-02 | 2.81    | 4.87  | 5.64E-01 | 13.29   | 8.06   | 9.90E-02 | 13.19  | 6.56  | 4.46E-02 | 0.94    | 7.76  | 9.04E-01 |
| cg21221263 | 6.46   | 3.13  | 3.88E-02 | 7.18    | 4.08  | 7.89E-02 | 9.13    | 8.55   | 2.86E-01 | 3.59   | 8.58  | 6.75E-01 | 3.76    | 8.14  | 6.44E-01 |

|            |        |       |          |         |       |          |         |        |          |         |       |          |        |       |          |
|------------|--------|-------|----------|---------|-------|----------|---------|--------|----------|---------|-------|----------|--------|-------|----------|
| cg02044689 | 17.13  | 8.29  | 3.88E-02 | 21.83   | 12.43 | 7.91E-02 | 7.56    | 17.47  | 6.65E-01 | 4.33    | 17.83 | 8.08E-01 | 41.95  | 24.56 | 8.76E-02 |
| cg23605284 | 16.23  | 7.86  | 3.88E-02 | 12.43   | 6.81  | 6.81E-02 | 41.53   | 18.97  | 2.86E-02 | 43.66   | 27.45 | 1.12E-01 | 2.46   | 12.52 | 8.45E-01 |
| cg16905907 | -11.33 | 5.48  | 3.89E-02 | -21.80  | 14.10 | 1.22E-01 | -4.23   | 22.96  | 8.54E-01 | -10.31  | 6.48  | 1.12E-01 | -5.35  | 19.99 | 7.89E-01 |
| cg18738058 | 19.79  | 9.58  | 3.89E-02 | 14.57   | 14.15 | 3.03E-01 | 28.08   | 27.98  | 3.16E-01 | 59.72   | 33.72 | 7.65E-02 | 14.55  | 16.35 | 3.74E-01 |
| cg26536164 | 17.48  | 8.46  | 3.89E-02 | 32.42   | 15.21 | 3.30E-02 | 26.37   | 19.72  | 1.81E-01 | 6.81    | 13.31 | 6.09E-01 | -1.67  | 26.52 | 9.50E-01 |
| cg21752660 | 9.44   | 4.57  | 3.89E-02 | 14.15   | 6.44  | 2.79E-02 | 2.59    | 11.54  | 8.22E-01 | 13.61   | 11.87 | 2.51E-01 | -0.63  | 10.47 | 9.52E-01 |
| cg10698677 | 41.33  | 20.01 | 3.89E-02 | 88.88   | 56.41 | 1.15E-01 | -35.51  | 115.11 | 7.58E-01 | 36.48   | 22.90 | 1.11E-01 | 41.78  | 70.40 | 5.53E-01 |
| cg20252735 | -34.57 | 16.73 | 3.89E-02 | -66.16  | 55.32 | 2.32E-01 | -277.99 | 257.57 | 2.80E-01 | -32.88  | 18.36 | 7.32E-02 | -0.21  | 61.79 | 9.97E-01 |
| cg03476529 | 19.00  | 9.20  | 3.89E-02 | 12.98   | 19.69 | 5.10E-01 | 32.79   | 21.75  | 1.32E-01 | 13.86   | 12.86 | 2.81E-01 | 35.20  | 30.43 | 2.47E-01 |
| cg14947666 | 19.71  | 9.54  | 3.89E-02 | 10.02   | 11.08 | 3.66E-01 | -4.82   | 31.06  | 8.77E-01 | 49.65   | 54.93 | 3.66E-01 | 38.98  | 14.89 | 8.85E-03 |
| cg00263307 | 16.87  | 8.17  | 3.89E-02 | 11.40   | 18.30 | 5.34E-01 | 9.62    | 38.56  | 8.03E-01 | 16.83   | 10.37 | 1.04E-01 | 27.46  | 22.17 | 2.16E-01 |
| cg14336011 | 11.56  | 5.60  | 3.89E-02 | 2.44    | 9.84  | 8.04E-01 | 8.79    | 13.76  | 5.23E-01 | 21.61   | 11.49 | 6.01E-02 | 15.30  | 10.69 | 1.52E-01 |
| cg04074945 | 7.52   | 3.64  | 3.89E-02 | 10.87   | 4.65  | 1.94E-02 | 8.58    | 7.56   | 2.56E-01 | 10.50   | 10.80 | 3.31E-01 | -6.87  | 8.91  | 4.41E-01 |
| cg01044179 | -9.54  | 4.62  | 3.89E-02 | -16.81  | 12.41 | 1.76E-01 | -16.69  | 16.82  | 3.21E-01 | -6.59   | 5.52  | 2.33E-01 | -15.50 | 15.69 | 3.23E-01 |
| cg10882886 | 20.45  | 9.90  | 3.89E-02 | 12.66   | 21.20 | 5.50E-01 | -1.13   | 21.08  | 9.57E-01 | 26.26   | 14.87 | 7.75E-02 | 53.26  | 28.77 | 6.42E-02 |
| cg14399134 | -11.72 | 5.67  | 3.89E-02 | 3.39    | 14.61 | 8.17E-01 | -23.24  | 16.91  | 1.69E-01 | -11.32  | 6.95  | 1.03E-01 | -29.78 | 21.56 | 1.67E-01 |
| cg05376219 | 8.71   | 4.22  | 3.89E-02 | 9.96    | 5.80  | 8.61E-02 | 14.49   | 9.83   | 1.41E-01 | 11.44   | 11.11 | 3.03E-01 | -6.04  | 11.14 | 5.88E-01 |
| cg15796417 | 26.92  | 13.03 | 3.89E-02 | 35.11   | 16.63 | 3.48E-02 | 48.97   | 39.72  | 2.18E-01 | -1.21   | 43.20 | 9.78E-01 | 1.07   | 30.10 | 9.72E-01 |
| cg01877879 | 32.40  | 15.69 | 3.89E-02 | 27.41   | 19.71 | 1.64E-01 | -15.31  | 51.30  | 7.65E-01 | 24.33   | 86.38 | 7.78E-01 | 65.25  | 32.02 | 4.16E-02 |
| cg07249785 | -31.25 | 15.13 | 3.89E-02 | -24.49  | 20.71 | 2.37E-01 | -23.22  | 51.58  | 6.53E-01 | -39.38  | 37.54 | 2.94E-01 | -44.95 | 32.45 | 1.66E-01 |
| cg01776298 | 7.01   | 3.39  | 3.89E-02 | 7.10    | 5.56  | 2.02E-01 | 9.68    | 8.32   | 2.45E-01 | -0.64   | 6.09  | 9.17E-01 | 16.12  | 7.53  | 3.23E-02 |
| cg17904575 | -5.77  | 2.80  | 3.89E-02 | -4.09   | 3.92  | 2.98E-01 | -10.21  | 6.79   | 1.33E-01 | -5.52   | 7.47  | 4.60E-01 | -6.53  | 6.53  | 3.18E-01 |
| cg18064754 | -9.95  | 4.82  | 3.89E-02 | -7.19   | 7.11  | 3.11E-01 | -9.39   | 11.63  | 4.20E-01 | -13.42  | 12.30 | 2.75E-01 | -13.78 | 10.36 | 1.84E-01 |
| cg14201635 | -44.58 | 21.59 | 3.89E-02 | -103.06 | 63.16 | 1.03E-01 | 38.75   | 80.64  | 6.31E-01 | -41.05  | 25.18 | 1.03E-01 | -67.33 | 78.02 | 3.88E-01 |
| cg01113084 | -28.27 | 13.69 | 3.89E-02 | -37.78  | 16.01 | 1.83E-02 | -57.65  | 55.29  | 2.97E-01 | 1.65    | 61.98 | 9.79E-01 | 17.65  | 34.34 | 6.07E-01 |
| cg17473318 | 18.40  | 8.91  | 3.89E-02 | 3.78    | 14.76 | 7.98E-01 | 33.97   | 18.27  | 6.30E-02 | 19.96   | 17.79 | 2.62E-01 | 26.79  | 23.24 | 2.49E-01 |
| cg02489377 | -7.16  | 3.47  | 3.89E-02 | -8.45   | 4.86  | 8.24E-02 | -6.28   | 7.32   | 3.91E-01 | -7.10   | 14.63 | 6.27E-01 | -5.02  | 7.58  | 5.07E-01 |
| cg21850934 | 8.99   | 4.35  | 3.89E-02 | 15.87   | 8.53  | 6.29E-02 | 3.91    | 7.54   | 6.04E-01 | 9.29    | 8.13  | 2.53E-01 | 7.44   | 12.56 | 5.53E-01 |
| cg16049468 | -51.97 | 25.17 | 3.89E-02 | -77.52  | 34.25 | 2.36E-02 | 72.25   | 123.21 | 5.58E-01 | -42.14  | 55.68 | 4.49E-01 | -21.17 | 54.39 | 6.97E-01 |
| cg11055926 | -21.76 | 10.54 | 3.89E-02 | -40.73  | 13.95 | 3.49E-03 | -37.37  | 19.74  | 5.84E-02 | -9.47   | 16.62 | 5.69E-01 | 0.55   | 16.01 | 9.72E-01 |
| cg03263792 | 18.10  | 8.76  | 3.89E-02 | 11.41   | 14.98 | 4.46E-01 | 35.50   | 16.26  | 2.90E-02 | 16.79   | 18.39 | 3.61E-01 | 0.50   | 23.40 | 9.83E-01 |
| cg26616711 | -55.20 | 26.73 | 3.89E-02 | -52.83  | 36.41 | 1.47E-01 | 134.96  | 125.72 | 2.83E-01 | -100.77 | 53.51 | 5.97E-02 | -47.53 | 62.03 | 4.43E-01 |
| cg09649196 | 12.03  | 5.82  | 3.89E-02 | -1.26   | 17.59 | 9.43E-01 | 31.40   | 24.76  | 2.05E-01 | 11.14   | 6.58  | 9.03E-02 | 32.94  | 25.67 | 1.99E-01 |
| cg12484534 | -14.71 | 7.12  | 3.89E-02 | -0.96   | 19.20 | 9.60E-01 | -47.44  | 32.48  | 1.44E-01 | -14.81  | 8.30  | 7.45E-02 | -17.74 | 25.36 | 4.84E-01 |
| cg26048025 | 9.93   | 4.81  | 3.89E-02 | 10.16   | 6.73  | 1.31E-01 | 3.02    | 10.76  | 7.79E-01 | 24.16   | 11.61 | 3.74E-02 | -0.07  | 14.00 | 9.96E-01 |



|            |        |       |          |        |       |          |        |        |          |        |       |          |        |       |          |
|------------|--------|-------|----------|--------|-------|----------|--------|--------|----------|--------|-------|----------|--------|-------|----------|
| cg26814075 | 8.35   | 4.04  | 3.89E-02 | 11.51  | 5.76  | 4.55E-02 | 18.13  | 10.21  | 7.58E-02 | -1.80  | 9.75  | 8.54E-01 | 0.77   | 9.58  | 9.36E-01 |
| cg21377158 | -13.66 | 6.62  | 3.89E-02 | 8.24   | 17.12 | 6.30E-01 | 0.12   | 35.64  | 9.97E-01 | -19.72 | 7.82  | 1.17E-02 | -7.85  | 20.83 | 7.06E-01 |
| cg26396086 | 18.03  | 8.73  | 3.89E-02 | 23.35  | 17.70 | 1.87E-01 | -15.53 | 31.85  | 6.26E-01 | 21.51  | 11.91 | 7.08E-02 | 13.56  | 23.09 | 5.57E-01 |
| cg00150128 | 22.97  | 11.13 | 3.89E-02 | 14.76  | 14.30 | 3.02E-01 | 24.46  | 29.43  | 4.06E-01 | 58.67  | 33.99 | 8.43E-02 | 29.43  | 29.26 | 3.14E-01 |
| cg01812400 | 17.98  | 8.71  | 3.89E-02 | -6.73  | 18.49 | 7.16E-01 | 40.90  | 19.80  | 3.89E-02 | 16.24  | 8.73  | 6.29E-02 | 36.94  | 27.38 | 1.77E-01 |
| cg22029810 | -14.15 | 6.85  | 3.89E-02 | 0.23   | 15.41 | 9.88E-01 | -7.71  | 20.01  | 7.00E-01 | -23.66 | 8.84  | 7.41E-03 | 6.36   | 21.75 | 7.70E-01 |
| cg27262850 | 9.00   | 4.36  | 3.89E-02 | 12.47  | 6.25  | 4.62E-02 | 10.94  | 10.58  | 3.01E-01 | 8.27   | 10.70 | 4.39E-01 | -1.63  | 10.34 | 8.75E-01 |
| cg21434327 | 15.93  | 7.72  | 3.89E-02 | 20.40  | 20.21 | 3.13E-01 | 30.38  | 31.55  | 3.36E-01 | 12.98  | 8.98  | 1.49E-01 | 27.56  | 32.30 | 3.93E-01 |
| cg06615719 | 18.28  | 8.85  | 3.89E-02 | -15.09 | 30.37 | 6.19E-01 | 149.66 | 173.48 | 3.88E-01 | 20.35  | 9.58  | 3.37E-02 | 30.65  | 36.57 | 4.02E-01 |
| cg27336300 | 27.46  | 13.30 | 3.90E-02 | 50.02  | 21.36 | 1.92E-02 | 8.49   | 21.84  | 6.98E-01 | 10.37  | 9.48  | 2.74E-01 | 65.77  | 27.85 | 1.82E-02 |
| cg04511463 | 17.61  | 8.53  | 3.90E-02 | 18.87  | 14.52 | 1.94E-01 | 7.48   | 30.03  | 8.03E-01 | 26.05  | 12.74 | 4.09E-02 | -9.41  | 24.05 | 6.96E-01 |
| cg21898884 | -7.53  | 3.65  | 3.90E-02 | -13.60 | 7.39  | 6.56E-02 | -1.60  | 12.11  | 8.95E-01 | -5.18  | 5.21  | 3.20E-01 | -8.74  | 8.71  | 3.16E-01 |
| cg05441941 | 28.95  | 14.02 | 3.90E-02 | 30.10  | 17.55 | 8.63E-02 | 10.11  | 18.20  | 5.79E-01 | 10.93  | 18.83 | 5.62E-01 | 82.76  | 26.72 | 1.96E-03 |
| cg00678398 | 15.82  | 7.66  | 3.90E-02 | 34.63  | 18.23 | 5.74E-02 | 9.64   | 20.68  | 6.41E-01 | 10.91  | 9.87  | 2.69E-01 | 21.73  | 26.65 | 4.15E-01 |
| cg03764364 | 7.42   | 3.59  | 3.90E-02 | 9.75   | 4.81  | 4.27E-02 | 0.21   | 9.49   | 9.83E-01 | 17.40  | 11.10 | 1.17E-01 | 0.66   | 8.15  | 9.35E-01 |
| cg10067304 | 16.61  | 8.05  | 3.90E-02 | 0.11   | 13.59 | 9.94E-01 | 33.12  | 15.57  | 3.34E-02 | 17.63  | 16.99 | 3.00E-01 | 23.89  | 20.24 | 2.38E-01 |
| cg02594677 | -11.74 | 5.68  | 3.90E-02 | -8.62  | 7.75  | 2.66E-01 | -14.18 | 13.09  | 2.79E-01 | -11.37 | 16.82 | 4.99E-01 | -19.65 | 14.25 | 1.68E-01 |
| cg18782651 | -6.95  | 3.37  | 3.90E-02 | -6.48  | 5.04  | 1.99E-01 | 2.39   | 7.36   | 7.45E-01 | -15.32 | 6.74  | 2.30E-02 | -7.48  | 8.38  | 3.72E-01 |
| cg00379720 | 8.98   | 4.35  | 3.90E-02 | 13.14  | 7.26  | 7.03E-02 | 11.16  | 11.17  | 3.17E-01 | 12.08  | 8.47  | 1.54E-01 | -2.73  | 9.15  | 7.65E-01 |
| cg26376346 | -8.49  | 4.11  | 3.90E-02 | -5.14  | 9.94  | 6.05E-01 | -3.56  | 14.37  | 8.04E-01 | -8.78  | 5.25  | 9.46E-02 | -14.39 | 11.20 | 1.99E-01 |
| cg09799039 | -20.44 | 9.90  | 3.90E-02 | -22.33 | 14.83 | 1.32E-01 | 4.58   | 31.44  | 8.84E-01 | -37.31 | 18.25 | 4.09E-02 | 0.30   | 24.72 | 9.90E-01 |
| cg25054196 | 17.66  | 8.56  | 3.90E-02 | 10.91  | 12.85 | 3.96E-01 | -1.15  | 17.39  | 9.47E-01 | 26.50  | 14.86 | 7.46E-02 | 45.58  | 21.81 | 3.66E-02 |
| cg05044694 | -28.05 | 13.59 | 3.90E-02 | -38.78 | 38.35 | 3.12E-01 | -7.22  | 153.16 | 9.62E-01 | -34.22 | 15.31 | 2.54E-02 | 48.99  | 48.51 | 3.13E-01 |
| cg14864369 | -11.93 | 5.78  | 3.90E-02 | -1.67  | 15.08 | 9.12E-01 | -10.68 | 21.21  | 6.15E-01 | -12.37 | 6.96  | 7.56E-02 | -26.19 | 19.20 | 1.72E-01 |
| cg03853227 | 26.35  | 12.76 | 3.90E-02 | 16.96  | 30.45 | 5.78E-01 | 23.10  | 122.23 | 8.50E-01 | 29.38  | 14.91 | 4.88E-02 | 19.70  | 44.93 | 6.61E-01 |
| cg23261073 | -24.32 | 11.78 | 3.90E-02 | -47.42 | 13.04 | 2.77E-04 | -44.96 | 28.64  | 1.16E-01 | -16.25 | 8.37  | 5.21E-02 | 7.05   | 19.64 | 7.20E-01 |
| cg12155963 | 19.97  | 9.68  | 3.90E-02 | 21.72  | 12.45 | 8.10E-02 | 49.13  | 31.65  | 1.21E-01 | 25.55  | 32.47 | 4.31E-01 | -0.06  | 20.95 | 9.98E-01 |
| cg13718628 | 25.68  | 12.44 | 3.90E-02 | 32.58  | 26.26 | 2.15E-01 | 56.13  | 96.86  | 5.62E-01 | 19.68  | 15.25 | 1.97E-01 | 46.43  | 40.66 | 2.54E-01 |
| cg16790416 | 18.58  | 9.00  | 3.90E-02 | 22.15  | 14.05 | 1.15E-01 | 21.77  | 24.60  | 3.76E-01 | 22.72  | 24.20 | 3.48E-01 | 10.82  | 15.96 | 4.98E-01 |
| cg13492520 | 10.80  | 5.23  | 3.90E-02 | 19.68  | 12.21 | 1.07E-01 | 17.38  | 13.39  | 1.94E-01 | 7.64   | 7.25  | 2.92E-01 | 3.84   | 13.91 | 7.83E-01 |
| cg00885606 | 27.22  | 13.19 | 3.90E-02 | 27.50  | 16.25 | 9.06E-02 | 37.00  | 41.72  | 3.75E-01 | 70.45  | 59.98 | 2.40E-01 | 10.42  | 29.98 | 7.28E-01 |
| cg01361354 | -12.75 | 6.18  | 3.90E-02 | -17.60 | 15.76 | 2.64E-01 | -9.72  | 25.97  | 7.08E-01 | -9.25  | 7.25  | 2.02E-01 | -44.08 | 24.63 | 7.35E-02 |
| cg23287435 | -10.30 | 4.99  | 3.90E-02 | -25.02 | 10.38 | 1.59E-02 | 1.83   | 16.82  | 9.13E-01 | -5.68  | 4.95  | 2.51E-01 | -16.00 | 12.78 | 2.10E-01 |
| cg16556679 | -11.78 | 5.71  | 3.90E-02 | -19.13 | 9.06  | 3.46E-02 | -8.24  | 27.04  | 7.60E-01 | -1.60  | 8.65  | 8.53E-01 | -25.18 | 16.22 | 1.21E-01 |
| cg12831293 | -17.20 | 8.33  | 3.90E-02 | -4.01  | 19.73 | 8.39E-01 | -5.40  | 39.64  | 8.92E-01 | -24.37 | 9.95  | 1.43E-02 | 11.14  | 30.25 | 7.13E-01 |

|            |        |       |          |        |       |          |        |        |          |         |       |          |        |       |          |
|------------|--------|-------|----------|--------|-------|----------|--------|--------|----------|---------|-------|----------|--------|-------|----------|
| cg03190219 | 6.93   | 3.36  | 3.90E-02 | 11.81  | 5.83  | 4.27E-02 | 2.40   | 7.13   | 7.37E-01 | 4.07    | 8.15  | 6.18E-01 | 6.47   | 6.39  | 3.11E-01 |
| cg05048199 | -22.66 | 10.98 | 3.90E-02 | -36.58 | 19.83 | 6.51E-02 | -23.95 | 31.28  | 4.44E-01 | -17.47  | 20.00 | 3.82E-01 | -12.02 | 21.16 | 5.70E-01 |
| cg20691080 | 8.78   | 4.26  | 3.90E-02 | 12.42  | 5.91  | 3.57E-02 | 2.22   | 9.50   | 8.16E-01 | 11.11   | 21.40 | 6.04E-01 | 6.07   | 8.65  | 4.83E-01 |
| cg03928539 | 15.88  | 7.70  | 3.90E-02 | 13.54  | 11.60 | 2.43E-01 | 34.77  | 28.54  | 2.23E-01 | 26.53   | 36.95 | 4.73E-01 | 14.07  | 11.55 | 2.23E-01 |
| cg21601498 | -7.03  | 3.41  | 3.90E-02 | -5.54  | 4.74  | 2.43E-01 | -5.33  | 7.69   | 4.88E-01 | -11.26  | 9.20  | 2.21E-01 | -10.55 | 8.81  | 2.31E-01 |
| cg26220985 | -13.32 | 6.46  | 3.90E-02 | -18.90 | 13.58 | 1.64E-01 | -9.19  | 16.23  | 5.71E-01 | -8.41   | 9.51  | 3.76E-01 | -23.99 | 16.39 | 1.43E-01 |
| cg19673329 | 12.66  | 6.13  | 3.90E-02 | 5.50   | 11.82 | 6.42E-01 | 15.93  | 24.97  | 5.23E-01 | 18.68   | 8.06  | 2.05E-02 | -6.44  | 20.22 | 7.50E-01 |
| cg17869315 | 20.07  | 9.72  | 3.90E-02 | 37.53  | 11.19 | 7.96E-04 | 21.15  | 13.59  | 1.20E-01 | -1.31   | 10.06 | 8.96E-01 | 27.16  | 17.42 | 1.19E-01 |
| cg23819016 | 10.17  | 4.93  | 3.90E-02 | 4.91   | 6.79  | 4.70E-01 | 19.73  | 10.37  | 5.71E-02 | 3.92    | 22.81 | 8.64E-01 | 14.59  | 10.95 | 1.83E-01 |
| cg01146875 | 22.81  | 11.05 | 3.90E-02 | 4.34   | 13.93 | 7.56E-01 | 55.78  | 34.13  | 1.02E-01 | 51.13   | 39.79 | 1.99E-01 | 31.43  | 16.18 | 5.21E-02 |
| cg12070379 | 28.64  | 13.87 | 3.90E-02 | 49.69  | 41.52 | 2.31E-01 | -79.39 | 188.76 | 6.74E-01 | 31.91   | 15.95 | 4.55E-02 | -4.87  | 38.98 | 9.01E-01 |
| cg21480043 | -10.71 | 5.19  | 3.90E-02 | -10.20 | 8.48  | 2.29E-01 | -1.15  | 13.40  | 9.32E-01 | -13.11  | 9.80  | 1.81E-01 | -15.56 | 11.72 | 1.85E-01 |
| cg07997529 | 8.74   | 4.24  | 3.90E-02 | 5.45   | 5.97  | 3.62E-01 | 18.96  | 10.03  | 5.88E-02 | 11.81   | 10.27 | 2.50E-01 | 4.13   | 10.99 | 7.07E-01 |
| cg05341549 | -11.16 | 5.41  | 3.90E-02 | -10.66 | 7.64  | 1.63E-01 | -21.73 | 12.95  | 9.33E-02 | -13.48  | 17.15 | 4.32E-01 | -3.05  | 11.42 | 7.90E-01 |
| cg13971892 | 41.87  | 20.29 | 3.90E-02 | 42.86  | 22.33 | 5.50E-02 | -15.38 | 50.57  | 7.61E-01 | 105.17  | 37.91 | 5.53E-03 | 20.55  | 30.56 | 5.01E-01 |
| cg09169255 | 14.14  | 6.85  | 3.90E-02 | 31.61  | 18.45 | 8.68E-02 | 20.14  | 29.49  | 4.95E-01 | 14.75   | 9.53  | 1.22E-01 | 3.69   | 12.68 | 7.71E-01 |
| cg07563944 | -10.90 | 5.28  | 3.90E-02 | -15.54 | 7.11  | 2.89E-02 | -8.73  | 11.66  | 4.54E-01 | -8.95   | 18.09 | 6.21E-01 | 1.36   | 13.25 | 9.18E-01 |
| cg14705695 | -9.40  | 4.56  | 3.90E-02 | -14.47 | 8.21  | 7.81E-02 | -14.07 | 12.06  | 2.43E-01 | -1.77   | 5.15  | 7.31E-01 | -20.73 | 10.75 | 5.39E-02 |
| cg11236311 | -8.50  | 4.12  | 3.90E-02 | -7.04  | 5.11  | 1.68E-01 | -19.26 | 10.67  | 7.10E-02 | -21.96  | 24.76 | 3.75E-01 | -2.53  | 9.92  | 7.99E-01 |
| cg22228407 | -12.85 | 6.23  | 3.90E-02 | -2.40  | 11.63 | 8.37E-01 | -6.21  | 16.34  | 7.04E-01 | -23.65  | 9.08  | 9.22E-03 | -1.51  | 19.83 | 9.39E-01 |
| cg23380624 | 13.83  | 6.70  | 3.90E-02 | 4.30   | 17.00 | 8.01E-01 | 26.93  | 17.70  | 1.28E-01 | 14.80   | 8.47  | 8.07E-02 | 0.62   | 24.31 | 9.80E-01 |
| cg02482438 | -7.54  | 3.66  | 3.90E-02 | -18.65 | 8.81  | 3.42E-02 | -7.23  | 15.09  | 6.32E-01 | -4.81   | 4.50  | 2.86E-01 | -6.71  | 11.04 | 5.43E-01 |
| cg11099009 | 21.07  | 10.21 | 3.90E-02 | 26.71  | 22.44 | 2.34E-01 | 57.13  | 54.98  | 2.99E-01 | 21.74   | 12.70 | 8.68E-02 | -4.41  | 30.56 | 8.85E-01 |
| cg05934015 | -9.78  | 4.74  | 3.91E-02 | -9.59  | 6.51  | 1.41E-01 | -12.09 | 17.94  | 5.01E-01 | -13.58  | 11.40 | 2.34E-01 | -6.62  | 9.94  | 5.05E-01 |
| cg05428946 | 28.20  | 13.67 | 3.91E-02 | 36.52  | 19.83 | 6.55E-02 | 18.10  | 47.10  | 7.01E-01 | 37.05   | 36.17 | 3.06E-01 | 13.56  | 25.02 | 5.88E-01 |
| cg06061645 | 47.76  | 23.15 | 3.91E-02 | 49.16  | 30.62 | 1.08E-01 | 6.47   | 76.10  | 9.32E-01 | 27.04   | 75.61 | 7.21E-01 | 68.26  | 47.02 | 1.47E-01 |
| cg01836438 | -14.41 | 6.98  | 3.91E-02 | -29.34 | 11.33 | 9.63E-03 | -0.87  | 15.78  | 9.56E-01 | -8.37   | 16.71 | 6.16E-01 | -6.56  | 13.98 | 6.39E-01 |
| cg05061393 | -19.76 | 9.57  | 3.91E-02 | -21.58 | 11.80 | 6.75E-02 | 77.36  | 79.34  | 3.30E-01 | -19.29  | 22.45 | 3.90E-01 | -21.83 | 25.11 | 3.85E-01 |
| cg15331633 | -12.46 | 6.04  | 3.91E-02 | -11.89 | 10.75 | 2.69E-01 | -14.65 | 10.47  | 1.62E-01 | -11.40  | 15.02 | 4.48E-01 | -10.48 | 13.86 | 4.49E-01 |
| cg25294646 | -19.64 | 9.52  | 3.91E-02 | -31.16 | 23.56 | 1.86E-01 | -49.66 | 100.75 | 6.22E-01 | -13.38  | 11.08 | 2.27E-01 | -47.12 | 31.74 | 1.38E-01 |
| cg07513332 | -46.96 | 22.76 | 3.91E-02 | -49.68 | 22.04 | 2.42E-02 | 99.46  | 87.91  | 2.58E-01 | -100.48 | 35.38 | 4.52E-03 | -30.40 | 27.55 | 2.70E-01 |
| cg01044662 | -8.93  | 4.33  | 3.91E-02 | -8.69  | 6.29  | 1.67E-01 | -3.73  | 10.25  | 7.16E-01 | -9.91   | 11.71 | 3.97E-01 | -13.21 | 9.42  | 1.60E-01 |
| cg17928607 | -14.30 | 6.93  | 3.91E-02 | -7.28  | 18.22 | 6.90E-01 | -11.98 | 25.61  | 6.40E-01 | -15.75  | 8.28  | 5.71E-02 | -16.43 | 24.34 | 5.00E-01 |
| cg17319486 | 19.28  | 9.35  | 3.91E-02 | 27.81  | 14.83 | 6.07E-02 | -11.53 | 22.62  | 6.10E-01 | 37.01   | 32.06 | 2.48E-01 | 20.34  | 15.86 | 2.00E-01 |
| cg04559485 | 12.65  | 6.13  | 3.91E-02 | 6.41   | 20.63 | 7.56E-01 | 8.14   | 34.82  | 8.15E-01 | 12.21   | 6.70  | 6.85E-02 | 36.90  | 29.29 | 2.08E-01 |

|            |        |       |          |        |       |          |         |        |          |        |       |          |        |       |          |
|------------|--------|-------|----------|--------|-------|----------|---------|--------|----------|--------|-------|----------|--------|-------|----------|
| cg19893585 | 5.77   | 2.80  | 3.91E-02 | 4.98   | 3.31  | 1.32E-01 | 11.04   | 6.86   | 1.07E-01 | 7.50   | 10.09 | 4.57E-01 | -5.09  | 13.88 | 7.14E-01 |
| cg04937635 | -6.92  | 3.35  | 3.91E-02 | -6.22  | 7.72  | 4.20E-01 | -1.40   | 12.07  | 9.08E-01 | -8.73  | 4.37  | 4.57E-02 | -3.41  | 8.81  | 6.99E-01 |
| cg05896295 | 10.70  | 5.19  | 3.91E-02 | 14.79  | 7.54  | 4.99E-02 | 13.56   | 13.88  | 3.28E-01 | 3.72   | 10.82 | 7.31E-01 | 6.07   | 13.05 | 6.42E-01 |
| cg07362800 | -10.04 | 4.86  | 3.91E-02 | -12.62 | 7.51  | 9.29E-02 | -5.50   | 13.10  | 6.74E-01 | -2.78  | 11.92 | 8.16E-01 | -12.75 | 9.26  | 1.68E-01 |
| cg09760210 | -9.73  | 4.72  | 3.91E-02 | -18.34 | 9.18  | 4.56E-02 | -11.88  | 16.62  | 4.75E-01 | -6.33  | 6.50  | 3.31E-01 | -4.64  | 13.15 | 7.24E-01 |
| cg14580859 | -11.87 | 5.75  | 3.91E-02 | -12.00 | 11.28 | 2.88E-01 | -7.50   | 12.59  | 5.51E-01 | -8.23  | 9.86  | 4.04E-01 | -22.99 | 13.18 | 8.12E-02 |
| cg10410121 | 11.12  | 5.39  | 3.91E-02 | 21.08  | 9.51  | 2.66E-02 | 16.95   | 11.42  | 1.38E-01 | 0.58   | 8.19  | 9.43E-01 | 12.61  | 30.46 | 6.79E-01 |
| cg00055771 | -11.16 | 5.41  | 3.91E-02 | -19.09 | 13.04 | 1.43E-01 | -6.09   | 15.68  | 6.98E-01 | -11.67 | 6.81  | 8.64E-02 | 2.86   | 19.45 | 8.83E-01 |
| cg14037769 | 20.37  | 9.87  | 3.91E-02 | 19.06  | 18.43 | 3.01E-01 | 24.63   | 19.15  | 1.98E-01 | 7.56   | 18.95 | 6.90E-01 | 35.80  | 23.53 | 1.28E-01 |
| cg21149708 | 14.81  | 7.18  | 3.91E-02 | 26.59  | 10.14 | 8.73E-03 | -8.26   | 15.05  | 5.83E-01 | 16.49  | 15.06 | 2.74E-01 | 14.35  | 12.86 | 2.65E-01 |
| cg00109300 | -34.30 | 16.62 | 3.91E-02 | -32.91 | 21.48 | 1.26E-01 | -44.09  | 72.44  | 5.43E-01 | -23.97 | 71.92 | 7.39E-01 | -37.24 | 30.61 | 2.24E-01 |
| cg17307051 | 9.70   | 4.70  | 3.91E-02 | 12.60  | 8.18  | 1.23E-01 | 13.26   | 10.13  | 1.91E-01 | 8.88   | 8.66  | 3.05E-01 | 0.42   | 11.73 | 9.71E-01 |
| cg06362065 | 32.05  | 15.54 | 3.91E-02 | 37.21  | 19.36 | 5.46E-02 | 90.92   | 75.75  | 2.30E-01 | 65.08  | 82.45 | 4.30E-01 | 7.01   | 29.45 | 8.12E-01 |
| cg05384646 | -6.31  | 3.06  | 3.91E-02 | -8.43  | 4.65  | 6.97E-02 | -3.11   | 6.38   | 6.26E-01 | 0.70   | 9.01  | 9.38E-01 | -9.14  | 6.50  | 1.60E-01 |
| cg17761990 | 23.04  | 11.17 | 3.91E-02 | 24.39  | 13.99 | 8.13E-02 | 44.00   | 42.72  | 3.03E-01 | 20.97  | 45.42 | 6.44E-01 | 13.78  | 23.10 | 5.51E-01 |
| cg06903544 | 21.06  | 10.21 | 3.91E-02 | 45.88  | 23.73 | 5.31E-02 | -115.54 | 133.46 | 3.87E-01 | 13.66  | 11.67 | 2.42E-01 | 48.79  | 40.47 | 2.28E-01 |
| cg11096815 | 45.29  | 21.96 | 3.91E-02 | 59.50  | 29.39 | 4.29E-02 | -87.57  | 100.98 | 3.86E-01 | 63.10  | 97.16 | 5.16E-01 | 37.84  | 37.46 | 3.12E-01 |
| cg01858394 | 22.26  | 10.79 | 3.91E-02 | 25.87  | 16.77 | 1.23E-01 | -3.48   | 19.67  | 8.60E-01 | 18.65  | 18.62 | 3.17E-01 | 54.54  | 22.94 | 1.74E-02 |
| cg09303701 | -37.69 | 18.27 | 3.91E-02 | -61.29 | 39.81 | 1.24E-01 | 16.19   | 241.09 | 9.46E-01 | -38.47 | 21.77 | 7.73E-02 | 27.99  | 64.92 | 6.66E-01 |
| cg17274953 | 26.61  | 12.90 | 3.91E-02 | 8.47   | 46.94 | 8.57E-01 | -110.57 | 159.27 | 4.88E-01 | 32.41  | 13.87 | 1.94E-02 | -26.01 | 56.50 | 6.45E-01 |
| cg20856181 | 27.64  | 13.40 | 3.91E-02 | 29.82  | 22.04 | 1.76E-01 | 3.76    | 27.56  | 8.91E-01 | 16.10  | 8.81  | 6.76E-02 | 81.13  | 28.04 | 3.81E-03 |
| cg07400453 | -14.53 | 7.04  | 3.92E-02 | -10.20 | 12.43 | 4.12E-01 | -34.02  | 30.71  | 2.68E-01 | -21.00 | 9.85  | 3.29E-02 | 11.25  | 20.83 | 5.89E-01 |
| cg10637370 | 20.66  | 10.02 | 3.92E-02 | 30.86  | 20.39 | 1.30E-01 | 25.90   | 21.54  | 2.29E-01 | 3.45   | 15.81 | 8.27E-01 | 44.13  | 26.66 | 9.79E-02 |
| cg16985288 | 13.32  | 6.46  | 3.92E-02 | 14.63  | 8.11  | 7.11E-02 | 20.20   | 19.06  | 2.89E-01 | -5.23  | 24.84 | 8.33E-01 | 11.29  | 15.06 | 4.53E-01 |
| cg11895717 | -27.33 | 13.25 | 3.92E-02 | -50.93 | 39.36 | 1.96E-01 | -5.16   | 211.15 | 9.81E-01 | -25.78 | 14.81 | 8.17E-02 | -10.87 | 46.35 | 8.15E-01 |
| cg22707563 | 46.18  | 22.39 | 3.92E-02 | 40.67  | 30.24 | 1.79E-01 | 196.62  | 137.61 | 1.53E-01 | 21.81  | 50.05 | 6.63E-01 | 63.51  | 47.15 | 1.78E-01 |
| cg04160753 | -16.28 | 7.89  | 3.92E-02 | -5.44  | 12.26 | 6.57E-01 | -23.81  | 18.66  | 2.02E-01 | -29.76 | 20.08 | 1.38E-01 | -20.49 | 15.71 | 1.92E-01 |
| cg01705052 | 21.63  | 10.49 | 3.92E-02 | 21.06  | 34.13 | 5.37E-01 | -24.44  | 113.83 | 8.30E-01 | 20.67  | 11.41 | 7.01E-02 | 45.67  | 45.85 | 3.19E-01 |
| cg02773433 | 11.56  | 5.61  | 3.92E-02 | 19.96  | 9.20  | 3.00E-02 | 7.05    | 14.10  | 6.17E-01 | 10.64  | 13.44 | 4.29E-01 | 3.99   | 10.30 | 6.98E-01 |
| cg23032184 | -41.02 | 19.89 | 3.92E-02 | -51.07 | 27.77 | 6.59E-02 | 24.77   | 144.12 | 8.64E-01 | -46.63 | 42.58 | 2.74E-01 | -20.48 | 39.81 | 6.07E-01 |
| cg12167335 | -12.09 | 5.86  | 3.92E-02 | 3.96   | 15.73 | 8.01E-01 | 7.06    | 22.22  | 7.51E-01 | -15.40 | 6.83  | 2.42E-02 | -32.24 | 24.83 | 1.94E-01 |
| cg09151829 | -36.01 | 17.46 | 3.92E-02 | -79.80 | 58.09 | 1.70E-01 | -141.47 | 232.41 | 5.43E-01 | -27.59 | 19.14 | 1.49E-01 | -70.20 | 65.17 | 2.81E-01 |
| cg04175604 | 21.33  | 10.34 | 3.92E-02 | 28.96  | 16.63 | 8.15E-02 | 29.80   | 25.10  | 2.35E-01 | -16.87 | 22.83 | 4.60E-01 | 30.87  | 15.78 | 5.05E-02 |
| cg15309953 | 5.45   | 2.64  | 3.92E-02 | 4.34   | 4.29  | 3.11E-01 | 3.09    | 5.90   | 6.01E-01 | 8.90   | 5.13  | 8.29E-02 | 5.32   | 6.73  | 4.29E-01 |
| cg03659340 | 23.41  | 11.35 | 3.92E-02 | 22.97  | 18.96 | 2.26E-01 | 24.83   | 23.93  | 3.00E-01 | 10.01  | 8.14  | 2.19E-01 | 74.59  | 29.05 | 1.02E-02 |

|            |        |       |          |        |       |          |         |        |          |        |       |          |        |       |          |
|------------|--------|-------|----------|--------|-------|----------|---------|--------|----------|--------|-------|----------|--------|-------|----------|
| cg11016151 | -14.99 | 7.27  | 3.92E-02 | -23.36 | 13.79 | 9.02E-02 | -2.03   | 17.46  | 9.08E-01 | -15.57 | 10.95 | 1.55E-01 | -11.87 | 22.17 | 5.92E-01 |
| cg10215604 | 20.09  | 9.74  | 3.92E-02 | 48.56  | 19.27 | 1.18E-02 | -11.34  | 30.18  | 7.07E-01 | 14.37  | 7.23  | 4.70E-02 | 29.05  | 31.69 | 3.59E-01 |
| cg22165175 | 8.64   | 4.19  | 3.92E-02 | 15.60  | 6.43  | 1.52E-02 | 5.39    | 12.04  | 6.55E-01 | 2.47   | 9.07  | 7.86E-01 | 3.46   | 8.56  | 6.86E-01 |
| cg12048552 | -32.69 | 15.85 | 3.92E-02 | -35.34 | 19.65 | 7.20E-02 | -13.87  | 72.15  | 8.48E-01 | 69.80  | 85.04 | 4.12E-01 | -42.99 | 30.74 | 1.62E-01 |
| cg27648556 | -11.72 | 5.68  | 3.92E-02 | -22.11 | 9.32  | 1.77E-02 | -6.38   | 13.15  | 6.27E-01 | -4.80  | 12.62 | 7.04E-01 | -5.60  | 11.63 | 6.30E-01 |
| cg13208159 | 12.59  | 6.11  | 3.92E-02 | 11.14  | 9.27  | 2.30E-01 | 19.64   | 12.43  | 1.14E-01 | 7.37   | 17.42 | 6.72E-01 | 10.48  | 13.60 | 4.41E-01 |
| cg19306063 | 21.62  | 10.49 | 3.92E-02 | 0.80   | 43.18 | 9.85E-01 | -210.95 | 169.00 | 2.12E-01 | 21.80  | 11.20 | 5.17E-02 | 53.85  | 42.45 | 2.05E-01 |
| cg16166739 | 18.06  | 8.76  | 3.92E-02 | 31.54  | 19.68 | 1.09E-01 | 11.64   | 20.85  | 5.77E-01 | 11.29  | 11.98 | 3.46E-01 | 41.08  | 29.11 | 1.58E-01 |
| cg25279100 | 17.45  | 8.46  | 3.92E-02 | 29.61  | 20.59 | 1.50E-01 | 18.87   | 24.93  | 4.49E-01 | 15.82  | 10.62 | 1.36E-01 | 2.78   | 29.78 | 9.26E-01 |
| cg22974337 | -13.02 | 6.31  | 3.92E-02 | -10.62 | 12.68 | 4.02E-01 | -17.65  | 29.29  | 5.47E-01 | -9.20  | 8.87  | 3.00E-01 | -24.68 | 14.17 | 8.15E-02 |
| cg02141358 | -15.35 | 7.45  | 3.92E-02 | -26.12 | 20.90 | 2.12E-01 | -5.83   | 20.26  | 7.74E-01 | -11.80 | 9.38  | 2.08E-01 | -35.29 | 22.65 | 1.19E-01 |
| cg10588135 | 8.23   | 3.99  | 3.92E-02 | 10.55  | 5.49  | 5.50E-02 | 5.33    | 8.92   | 5.50E-01 | 15.25  | 13.50 | 2.59E-01 | 1.43   | 9.31  | 8.78E-01 |
| cg02387974 | 29.60  | 14.36 | 3.92E-02 | 38.68  | 19.15 | 4.34E-02 | 13.45   | 40.14  | 7.38E-01 | -7.40  | 42.06 | 8.60E-01 | 36.20  | 32.64 | 2.67E-01 |
| cg18506018 | -9.24  | 4.48  | 3.92E-02 | -16.06 | 9.17  | 7.99E-02 | -17.24  | 15.37  | 2.62E-01 | -3.17  | 6.22  | 6.10E-01 | -14.63 | 11.32 | 1.96E-01 |
| cg19734822 | 8.65   | 4.20  | 3.92E-02 | 3.80   | 5.56  | 4.94E-01 | 13.89   | 8.70   | 1.10E-01 | 25.10  | 18.02 | 1.64E-01 | 13.21  | 11.10 | 2.34E-01 |
| cg07938763 | -28.57 | 13.86 | 3.92E-02 | -42.61 | 19.26 | 2.70E-02 | -71.63  | 51.69  | 1.66E-01 | -18.00 | 31.85 | 5.72E-01 | 9.18   | 29.44 | 7.55E-01 |
| cg23342625 | -13.91 | 6.75  | 3.92E-02 | -7.07  | 17.36 | 6.84E-01 | -3.76   | 27.17  | 8.90E-01 | -17.32 | 7.92  | 2.88E-02 | -0.72  | 27.16 | 9.79E-01 |
| cg17963548 | 12.80  | 6.21  | 3.92E-02 | 17.84  | 13.64 | 1.91E-01 | 9.47    | 20.27  | 6.40E-01 | 10.02  | 7.91  | 2.05E-01 | 24.68  | 21.61 | 2.53E-01 |
| cg06902071 | 17.03  | 8.26  | 3.93E-02 | 28.58  | 20.79 | 1.69E-01 | 4.73    | 47.20  | 9.20E-01 | 10.88  | 9.71  | 2.62E-01 | 51.02  | 27.82 | 6.67E-02 |
| cg00385142 | -14.34 | 6.96  | 3.93E-02 | -33.90 | 17.47 | 5.23E-02 | -16.44  | 28.63  | 5.66E-01 | -8.39  | 8.34  | 3.14E-01 | -24.96 | 23.68 | 2.92E-01 |
| cg01617285 | 17.31  | 8.40  | 3.93E-02 | 21.25  | 10.05 | 3.44E-02 | 18.15   | 17.79  | 3.08E-01 | -86.76 | 56.96 | 1.28E-01 | 17.78  | 14.00 | 2.04E-01 |
| cg02836541 | 12.38  | 6.01  | 3.93E-02 | -8.10  | 18.01 | 6.53E-01 | 38.84   | 51.53  | 4.51E-01 | 15.28  | 6.90  | 2.67E-02 | 9.99   | 17.56 | 5.69E-01 |
| cg10503827 | -10.16 | 4.93  | 3.93E-02 | -9.66  | 6.91  | 1.62E-01 | -13.20  | 12.39  | 2.87E-01 | -11.27 | 14.91 | 4.50E-01 | -8.61  | 10.41 | 4.09E-01 |
| cg12231088 | 18.38  | 8.92  | 3.93E-02 | 46.78  | 21.36 | 2.85E-02 | 1.37    | 22.95  | 9.52E-01 | 16.91  | 11.69 | 1.48E-01 | 2.09   | 29.12 | 9.43E-01 |
| cg25410117 | 13.71  | 6.65  | 3.93E-02 | 22.11  | 11.89 | 6.31E-02 | 20.22   | 17.01  | 2.35E-01 | 6.56   | 11.87 | 5.80E-01 | 7.47   | 14.14 | 5.97E-01 |
| cg18443629 | 4.95   | 2.40  | 3.93E-02 | 4.78   | 4.17  | 2.52E-01 | -1.41   | 5.15   | 7.84E-01 | 8.03   | 4.52  | 7.59E-02 | 8.34   | 5.84  | 1.53E-01 |
| cg09685763 | -11.01 | 5.34  | 3.93E-02 | -22.89 | 13.70 | 9.47E-02 | -7.67   | 17.46  | 6.60E-01 | -8.30  | 6.72  | 2.17E-01 | -12.79 | 15.22 | 4.01E-01 |
| cg06655349 | 4.61   | 2.23  | 3.93E-02 | 3.55   | 2.76  | 1.98E-01 | 11.48   | 5.41   | 3.39E-02 | 4.21   | 9.30  | 6.50E-01 | 0.65   | 6.60  | 9.21E-01 |
| cg26413192 | -12.88 | 6.25  | 3.93E-02 | -27.89 | 11.52 | 1.55E-02 | 5.14    | 15.51  | 7.40E-01 | -11.75 | 9.78  | 2.30E-01 | -8.24  | 13.91 | 5.53E-01 |
| cg01087880 | 22.70  | 11.01 | 3.93E-02 | 11.06  | 29.47 | 7.07E-01 | 49.74   | 70.04  | 4.78E-01 | 23.05  | 13.04 | 7.72E-02 | 28.47  | 31.44 | 3.65E-01 |
| cg20659752 | 7.87   | 3.82  | 3.93E-02 | 11.24  | 5.52  | 4.19E-02 | 6.66    | 7.71   | 3.88E-01 | 10.35  | 16.64 | 5.34E-01 | 1.43   | 8.07  | 8.60E-01 |
| cg02673418 | -36.88 | 17.89 | 3.93E-02 | -28.55 | 25.04 | 2.54E-01 | -42.63  | 48.46  | 3.79E-01 | 0.74   | 61.37 | 9.90E-01 | -61.78 | 34.57 | 7.39E-02 |
| cg07871202 | 9.97   | 4.84  | 3.93E-02 | 15.14  | 7.35  | 3.94E-02 | 12.27   | 10.70  | 2.51E-01 | 9.67   | 14.96 | 5.18E-01 | -0.41  | 9.52  | 9.66E-01 |
| cg05703659 | -11.71 | 5.68  | 3.93E-02 | 0.71   | 11.60 | 9.51E-01 | -16.41  | 18.59  | 3.78E-01 | -10.39 | 5.53  | 6.01E-02 | -35.07 | 15.38 | 2.26E-02 |
| cg25786136 | -15.40 | 7.47  | 3.93E-02 | -19.17 | 18.74 | 3.06E-01 | -2.42   | 34.06  | 9.43E-01 | -13.36 | 8.86  | 1.32E-01 | -33.56 | 26.18 | 2.00E-01 |

|               |        |       |          |        |       |          |         |        |          |        |       |          |         |       |          |
|---------------|--------|-------|----------|--------|-------|----------|---------|--------|----------|--------|-------|----------|---------|-------|----------|
| cg08633074    | 5.34   | 2.59  | 3.93E-02 | 4.69   | 3.31  | 1.57E-01 | 10.69   | 6.53   | 1.01E-01 | 1.42   | 7.59  | 8.51E-01 | 5.46    | 7.68  | 4.78E-01 |
| cg25826226    | 27.13  | 13.16 | 3.93E-02 | 16.97  | 37.83 | 6.54E-01 | -57.82  | 130.06 | 6.57E-01 | 28.37  | 15.43 | 6.60E-02 | 35.64   | 35.07 | 3.10E-01 |
| cg12835118    | 16.42  | 7.97  | 3.93E-02 | -7.03  | 23.07 | 7.61E-01 | 39.64   | 42.26  | 3.48E-01 | 23.46  | 9.87  | 1.75E-02 | 2.93    | 18.08 | 8.71E-01 |
| cg16373998    | 7.84   | 3.80  | 3.93E-02 | 8.48   | 8.28  | 3.06E-01 | 16.86   | 10.71  | 1.16E-01 | 3.89   | 5.08  | 4.44E-01 | 17.02   | 11.89 | 1.52E-01 |
| cg18872426    | 11.02  | 5.35  | 3.93E-02 | 1.37   | 9.67  | 8.87E-01 | 6.08    | 25.06  | 8.08E-01 | 12.35  | 7.35  | 9.28E-02 | 31.68   | 15.47 | 4.06E-02 |
| cg04843690    | 21.04  | 10.21 | 3.93E-02 | 29.76  | 20.71 | 1.51E-01 | 1.16    | 20.88  | 9.56E-01 | 16.15  | 16.22 | 3.19E-01 | 58.74   | 29.31 | 4.51E-02 |
| cg25154244    | 6.92   | 3.36  | 3.93E-02 | 10.41  | 4.82  | 3.09E-02 | 9.60    | 7.35   | 1.92E-01 | -4.27  | 8.74  | 6.25E-01 | 3.15    | 8.45  | 7.09E-01 |
| cg10878459    | 21.77  | 10.57 | 3.93E-02 | 21.97  | 28.43 | 4.40E-01 | 22.52   | 108.14 | 8.35E-01 | 24.80  | 12.07 | 3.99E-02 | -5.46   | 35.94 | 8.79E-01 |
| cg06219103    | 19.08  | 9.26  | 3.93E-02 | 23.45  | 13.48 | 8.18E-02 | 22.02   | 19.09  | 2.49E-01 | 29.05  | 22.93 | 2.05E-01 | -14.59  | 25.66 | 5.70E-01 |
| cg27592318    | 19.56  | 9.49  | 3.93E-02 | 4.43   | 22.46 | 8.44E-01 | 9.77    | 25.63  | 7.03E-01 | 20.60  | 12.56 | 1.01E-01 | 49.87   | 28.14 | 7.64E-02 |
| cg02496377    | 24.37  | 11.82 | 3.93E-02 | 55.82  | 23.54 | 1.77E-02 | -5.46   | 27.34  | 8.42E-01 | 17.89  | 16.28 | 2.72E-01 | 31.87   | 33.89 | 3.47E-01 |
| cg14641092    | -7.74  | 3.75  | 3.93E-02 | -10.93 | 6.25  | 8.01E-02 | -8.25   | 6.91   | 2.33E-01 | -4.95  | 8.56  | 5.63E-01 | -2.66   | 9.66  | 7.83E-01 |
| cg08324801    | 9.48   | 4.60  | 3.93E-02 | 10.35  | 6.62  | 1.18E-01 | 18.24   | 11.82  | 1.23E-01 | 2.65   | 10.03 | 7.92E-01 | 7.49    | 11.71 | 5.22E-01 |
| cg22454370    | 13.47  | 6.54  | 3.93E-02 | 21.36  | 12.56 | 8.90E-02 | 16.41   | 12.09  | 1.75E-01 | 8.36   | 11.93 | 4.84E-01 | 2.75    | 17.72 | 8.77E-01 |
| cg27185793    | 13.45  | 6.53  | 3.93E-02 | 12.26  | 9.29  | 1.87E-01 | 16.75   | 13.39  | 2.11E-01 | 34.35  | 20.30 | 9.06E-02 | -0.85   | 16.07 | 9.58E-01 |
| cg01534766    | -13.65 | 6.62  | 3.93E-02 | -23.84 | 20.66 | 2.48E-01 | -12.69  | 33.96  | 7.09E-01 | -14.05 | 7.36  | 5.62E-02 | 13.57   | 29.89 | 6.50E-01 |
| cg02000808    | -8.14  | 3.95  | 3.93E-02 | -13.68 | 9.81  | 1.63E-01 | -11.19  | 17.58  | 5.24E-01 | -6.90  | 4.80  | 1.51E-01 | -6.22   | 11.84 | 5.99E-01 |
| cg25891433    | -8.11  | 3.93  | 3.93E-02 | -10.13 | 8.62  | 2.40E-01 | -4.98   | 10.81  | 6.45E-01 | -5.37  | 5.37  | 3.17E-01 | -20.01  | 11.23 | 7.47E-02 |
| cg05177776    | -10.20 | 4.95  | 3.93E-02 | -10.45 | 14.18 | 4.61E-01 | 0.91    | 16.13  | 9.55E-01 | -13.93 | 5.87  | 1.75E-02 | 12.50   | 18.38 | 4.96E-01 |
| cg09472953    | 36.42  | 17.67 | 3.93E-02 | 5.42   | 54.52 | 9.21E-01 | 182.67  | 213.28 | 3.92E-01 | 38.91  | 19.62 | 4.74E-02 | 39.44   | 63.71 | 5.36E-01 |
| cg26097878    | 14.33  | 6.95  | 3.93E-02 | 14.13  | 8.35  | 9.06E-02 | 21.94   | 26.61  | 4.10E-01 | 31.65  | 34.98 | 3.66E-01 | 8.96    | 15.64 | 5.67E-01 |
| cg11186405    | 13.05  | 6.33  | 3.93E-02 | 12.10  | 23.63 | 6.09E-01 | 122.72  | 92.84  | 1.86E-01 | 13.58  | 6.88  | 4.84E-02 | 1.29    | 23.07 | 9.55E-01 |
| cg16213667    | 9.78   | 4.75  | 3.93E-02 | 4.65   | 8.41  | 5.81E-01 | 12.79   | 11.58  | 2.69E-01 | 9.82   | 7.50  | 1.90E-01 | 19.56   | 14.08 | 1.65E-01 |
| cg24106661    | -13.56 | 6.58  | 3.94E-02 | -10.51 | 15.32 | 4.93E-01 | 45.76   | 37.41  | 2.21E-01 | -12.40 | 8.40  | 1.40E-01 | -23.00  | 11.10 | 3.83E-02 |
| ch.2.4281665R | -39.29 | 19.07 | 3.94E-02 | -34.34 | 22.74 | 1.31E-01 | -64.03  | 73.74  | 3.85E-01 | 16.30  | 58.67 | 7.81E-01 | -101.31 | 54.11 | 6.12E-02 |
| cg13843483    | 16.96  | 8.23  | 3.94E-02 | 39.36  | 18.45 | 3.29E-02 | -5.59   | 28.82  | 8.46E-01 | 17.77  | 7.88  | 2.41E-02 | -13.06  | 26.45 | 6.22E-01 |
| cg02510091    | -45.51 | 22.09 | 3.94E-02 | -65.18 | 25.68 | 1.11E-02 | -181.02 | 109.03 | 9.68E-02 | -12.46 | 51.10 | 8.07E-01 | -8.84   | 38.70 | 8.19E-01 |
| cg26330365    | 7.69   | 3.73  | 3.94E-02 | 2.03   | 5.70  | 7.21E-01 | 7.62    | 8.59   | 3.75E-01 | 13.60  | 8.42  | 1.06E-01 | 14.60   | 8.67  | 9.21E-02 |
| cg00168694    | 5.25   | 2.55  | 3.94E-02 | 5.87   | 3.20  | 6.68E-02 | 6.11    | 7.25   | 3.99E-01 | 3.63   | 8.36  | 6.64E-01 | 2.93    | 6.51  | 6.52E-01 |
| cg18605135    | -7.42  | 3.60  | 3.94E-02 | -9.20  | 6.58  | 1.62E-01 | -5.95   | 8.03   | 4.59E-01 | -11.16 | 5.94  | 6.05E-02 | 4.81    | 9.93  | 6.28E-01 |
| cg16625683    | 12.32  | 5.98  | 3.94E-02 | 12.41  | 6.24  | 4.66E-02 | 18.72   | 11.12  | 9.22E-02 | 29.36  | 13.24 | 2.66E-02 | -3.32   | 9.30  | 7.22E-01 |
| cg18305818    | 15.32  | 7.44  | 3.94E-02 | 26.33  | 16.54 | 1.11E-01 | -10.75  | 18.61  | 5.63E-01 | 16.62  | 10.00 | 9.67E-02 | 29.57   | 25.41 | 2.44E-01 |
| cg17104706    | 13.05  | 6.33  | 3.94E-02 | 22.99  | 16.72 | 1.69E-01 | 1.24    | 25.56  | 9.61E-01 | 12.62  | 7.42  | 8.91E-02 | 7.25    | 24.48 | 7.67E-01 |
| cg19214331    | 14.14  | 6.86  | 3.94E-02 | 32.19  | 14.99 | 3.18E-02 | 22.90   | 31.39  | 4.66E-01 | 6.11   | 8.69  | 4.82E-01 | 20.95   | 19.93 | 2.93E-01 |
| cg20675439    | 6.42   | 3.11  | 3.94E-02 | 7.99   | 4.35  | 6.61E-02 | 13.87   | 8.46   | 1.01E-01 | 3.19   | 6.58  | 6.27E-01 | -2.17   | 8.71  | 8.04E-01 |

|            |        |       |          |        |       |          |         |        |          |        |       |          |        |       |          |
|------------|--------|-------|----------|--------|-------|----------|---------|--------|----------|--------|-------|----------|--------|-------|----------|
| cg14101359 | -16.26 | 7.89  | 3.94E-02 | -8.14  | 21.46 | 7.04E-01 | -7.21   | 29.39  | 8.06E-01 | -20.87 | 9.26  | 2.42E-02 | 7.89   | 30.68 | 7.97E-01 |
| cg16439941 | -26.43 | 12.83 | 3.94E-02 | -8.55  | 21.12 | 6.86E-01 | -181.39 | 190.79 | 3.42E-01 | -39.50 | 17.16 | 2.14E-02 | -5.76  | 49.19 | 9.07E-01 |
| cg02793733 | -13.54 | 6.57  | 3.94E-02 | -13.16 | 15.31 | 3.90E-01 | -20.20  | 21.03  | 3.37E-01 | -11.87 | 8.70  | 1.73E-01 | -16.06 | 17.09 | 3.48E-01 |
| cg11603759 | 18.21  | 8.84  | 3.94E-02 | 34.73  | 14.91 | 1.99E-02 | -16.37  | 29.23  | 5.75E-01 | 17.06  | 17.59 | 3.32E-01 | 10.49  | 16.00 | 5.12E-01 |
| cg24924502 | 21.79  | 10.58 | 3.94E-02 | 9.69   | 12.88 | 4.52E-01 | 54.83   | 20.79  | 8.37E-03 | 0.53   | 24.93 | 9.83E-01 | 26.17  | 16.91 | 1.22E-01 |
| cg18327583 | 12.91  | 6.27  | 3.94E-02 | 21.07  | 15.31 | 1.69E-01 | -2.09   | 27.20  | 9.39E-01 | 9.86   | 7.66  | 1.98E-01 | 26.26  | 18.90 | 1.65E-01 |
| cg21794665 | 8.31   | 4.03  | 3.94E-02 | 3.20   | 6.21  | 6.06E-01 | 12.33   | 6.39   | 5.35E-02 | 16.34  | 7.46  | 2.86E-02 | -5.04  | 11.38 | 6.58E-01 |
| cg18854666 | 11.68  | 5.67  | 3.94E-02 | 9.53   | 7.83  | 2.23E-01 | 21.83   | 11.99  | 6.87E-02 | 6.57   | 19.15 | 7.32E-01 | 7.44   | 14.00 | 5.95E-01 |
| cg14502659 | 12.10  | 5.88  | 3.94E-02 | 6.81   | 10.63 | 5.22E-01 | 20.33   | 10.57  | 5.44E-02 | -2.09  | 12.63 | 8.69E-01 | 24.76  | 14.27 | 8.27E-02 |
| cg18404652 | -7.84  | 3.81  | 3.94E-02 | -7.48  | 5.04  | 1.38E-01 | -9.56   | 9.62   | 3.21E-01 | -7.08  | 11.54 | 5.39E-01 | -8.00  | 9.39  | 3.94E-01 |
| cg14279415 | -42.63 | 20.69 | 3.94E-02 | -24.62 | 19.07 | 1.97E-01 | -104.85 | 39.15  | 7.40E-03 | 23.81  | 67.79 | 7.25E-01 | -47.81 | 35.76 | 1.81E-01 |
| cg19623519 | 21.57  | 10.47 | 3.94E-02 | 6.67   | 17.25 | 6.99E-01 | 12.78   | 19.87  | 5.20E-01 | 22.57  | 16.90 | 1.82E-01 | 62.81  | 25.60 | 1.41E-02 |
| cg16663033 | -12.90 | 6.26  | 3.94E-02 | -19.09 | 11.43 | 9.48E-02 | -4.25   | 13.97  | 7.61E-01 | -15.05 | 11.04 | 1.73E-01 | -8.31  | 14.86 | 5.76E-01 |
| cg14099664 | 14.70  | 7.14  | 3.94E-02 | 14.79  | 14.81 | 3.18E-01 | 1.26    | 22.23  | 9.55E-01 | 11.27  | 9.52  | 2.37E-01 | 46.88  | 22.30 | 3.55E-02 |
| cg06310157 | 18.87  | 9.16  | 3.94E-02 | 2.60   | 16.51 | 8.75E-01 | 23.15   | 18.78  | 2.18E-01 | 11.87  | 20.29 | 5.59E-01 | 40.43  | 18.29 | 2.70E-02 |
| cg08323075 | 13.83  | 6.72  | 3.94E-02 | 18.64  | 28.39 | 5.11E-01 | 22.32   | 26.14  | 3.93E-01 | 12.03  | 7.70  | 1.18E-01 | 18.42  | 19.55 | 3.46E-01 |
| cg25730428 | 8.65   | 4.20  | 3.94E-02 | 12.12  | 5.66  | 3.21E-02 | 1.78    | 10.74  | 8.69E-01 | 19.86  | 12.58 | 1.14E-01 | -2.83  | 9.80  | 7.73E-01 |
| cg16473125 | 21.70  | 10.53 | 3.94E-02 | 20.99  | 23.82 | 3.78E-01 | 9.72    | 37.10  | 7.93E-01 | 23.12  | 14.81 | 1.19E-01 | 23.46  | 22.55 | 2.98E-01 |
| cg26503653 | -38.21 | 18.55 | 3.94E-02 | -43.64 | 23.15 | 5.94E-02 | -109.77 | 64.28  | 8.77E-02 | 33.03  | 60.03 | 5.82E-01 | -23.46 | 43.80 | 5.92E-01 |
| cg10503599 | 20.63  | 10.01 | 3.94E-02 | 34.78  | 16.55 | 3.56E-02 | -13.30  | 36.34  | 7.14E-01 | 8.01   | 15.58 | 6.07E-01 | 38.68  | 26.34 | 1.42E-01 |
| cg02349785 | 10.96  | 5.32  | 3.94E-02 | 20.12  | 12.17 | 9.84E-02 | -7.51   | 14.10  | 5.95E-01 | 10.92  | 7.26  | 1.32E-01 | 17.96  | 14.84 | 2.26E-01 |
| cg05719599 | 15.29  | 7.42  | 3.94E-02 | -0.23  | 20.82 | 9.91E-01 | -2.01   | 29.18  | 9.45E-01 | 16.61  | 8.61  | 5.37E-02 | 47.36  | 28.96 | 1.02E-01 |
| cg12192282 | -8.97  | 4.35  | 3.94E-02 | -20.13 | 7.15  | 4.89E-03 | 2.81    | 11.23  | 8.03E-01 | -6.56  | 5.02  | 1.92E-01 | -5.89  | 10.52 | 5.76E-01 |
| cg21991396 | 5.13   | 2.49  | 3.94E-02 | 4.49   | 3.18  | 1.58E-01 | 11.89   | 6.60   | 7.18E-02 | 4.72   | 7.95  | 5.53E-01 | 1.53   | 6.49  | 8.13E-01 |
| cg03567939 | 13.84  | 6.72  | 3.94E-02 | 8.94   | 9.13  | 3.28E-01 | 2.74    | 10.99  | 8.03E-01 | 14.27  | 15.68 | 3.63E-01 | 34.18  | 12.31 | 5.51E-03 |
| cg26336790 | 20.04  | 9.73  | 3.94E-02 | 32.42  | 18.64 | 8.21E-02 | 14.76   | 17.84  | 4.08E-01 | 9.78   | 17.91 | 5.85E-01 | 29.15  | 26.49 | 2.71E-01 |
| cg07614486 | 39.57  | 19.21 | 3.94E-02 | 26.82  | 23.22 | 2.48E-01 | 88.54   | 78.41  | 2.59E-01 | 84.68  | 81.66 | 3.00E-01 | 56.00  | 42.93 | 1.92E-01 |
| cg03668621 | 50.23  | 24.39 | 3.94E-02 | 61.93  | 27.37 | 2.37E-02 | -40.04  | 80.94  | 6.21E-01 | 99.20  | 41.95 | 1.81E-02 | -0.77  | 48.72 | 9.87E-01 |
| cg10462820 | 9.28   | 4.50  | 3.94E-02 | 11.83  | 6.37  | 6.33E-02 | 19.34   | 9.19   | 3.53E-02 | 0.69   | 22.01 | 9.75E-01 | -1.09  | 7.99  | 8.91E-01 |
| cg22493616 | 17.02  | 8.26  | 3.94E-02 | -13.06 | 21.94 | 5.52E-01 | 19.19   | 25.35  | 4.49E-01 | 20.50  | 10.62 | 5.35E-02 | 30.11  | 21.56 | 1.63E-01 |
| cg09526356 | 6.92   | 3.36  | 3.94E-02 | 2.05   | 4.75  | 6.66E-01 | 6.00    | 7.07   | 3.96E-01 | 19.02  | 7.87  | 1.57E-02 | 7.40   | 6.53  | 2.57E-01 |
| cg13332123 | -9.26  | 4.49  | 3.94E-02 | -15.80 | 10.49 | 1.32E-01 | -8.11   | 15.41  | 5.99E-01 | -7.37  | 6.01  | 2.20E-01 | -8.97  | 10.80 | 4.06E-01 |
| cg04222159 | -12.41 | 6.02  | 3.94E-02 | -14.11 | 9.06  | 1.19E-01 | 0.19    | 16.22  | 9.91E-01 | -11.30 | 16.21 | 4.86E-01 | -16.43 | 11.34 | 1.47E-01 |
| cg10042532 | 10.97  | 5.33  | 3.94E-02 | 16.97  | 9.96  | 8.84E-02 | 10.19   | 18.76  | 5.87E-01 | 7.50   | 7.16  | 2.95E-01 | 14.30  | 18.81 | 4.47E-01 |
| cg11886884 | -10.88 | 5.28  | 3.94E-02 | -14.02 | 7.93  | 7.72E-02 | -14.71  | 13.65  | 2.81E-01 | -5.28  | 12.08 | 6.62E-01 | -6.73  | 11.38 | 5.54E-01 |

|            |        |       |          |        |       |          |         |        |          |        |       |          |        |       |          |
|------------|--------|-------|----------|--------|-------|----------|---------|--------|----------|--------|-------|----------|--------|-------|----------|
| cg13351028 | -12.17 | 5.91  | 3.94E-02 | -19.88 | 16.63 | 2.32E-01 | -0.13   | 24.81  | 9.96E-01 | -11.25 | 6.75  | 9.56E-02 | -20.32 | 26.19 | 4.38E-01 |
| cg05733104 | -10.40 | 5.05  | 3.95E-02 | -17.93 | 8.74  | 4.01E-02 | -1.60   | 11.89  | 8.93E-01 | -7.59  | 9.72  | 4.35E-01 | -9.60  | 10.86 | 3.77E-01 |
| cg01926877 | 15.81  | 7.68  | 3.95E-02 | 16.59  | 29.37 | 5.72E-01 | 34.22   | 61.13  | 5.76E-01 | 16.23  | 8.58  | 5.84E-02 | 9.89   | 22.71 | 6.63E-01 |
| cg19087233 | 12.56  | 6.10  | 3.95E-02 | 10.37  | 8.13  | 2.02E-01 | 22.50   | 13.42  | 9.37E-02 | -11.39 | 23.38 | 6.26E-01 | 17.59  | 15.17 | 2.46E-01 |
| cg27477148 | 42.69  | 20.73 | 3.95E-02 | 66.57  | 59.91 | 2.67E-01 | -20.01  | 173.12 | 9.08E-01 | 38.68  | 23.87 | 1.05E-01 | 52.21  | 62.01 | 4.00E-01 |
| cg20748242 | 17.53  | 8.51  | 3.95E-02 | 37.03  | 14.64 | 1.14E-02 | 11.40   | 18.58  | 5.39E-01 | 6.46   | 14.67 | 6.60E-01 | 3.81   | 25.05 | 8.79E-01 |
| cg11953250 | 17.16  | 8.34  | 3.95E-02 | 19.97  | 14.94 | 1.81E-01 | 6.36    | 17.82  | 7.21E-01 | 12.98  | 14.94 | 3.85E-01 | 34.75  | 20.92 | 9.67E-02 |
| cg24663338 | 4.54   | 2.20  | 3.95E-02 | 3.87   | 3.03  | 2.02E-01 | 5.99    | 5.65   | 2.89E-01 | 7.51   | 4.67  | 1.08E-01 | -0.85  | 7.02  | 9.04E-01 |
| cg11376305 | 30.83  | 14.97 | 3.95E-02 | 19.44  | 40.62 | 6.32E-01 | -145.53 | 173.11 | 4.01E-01 | 37.82  | 16.78 | 2.42E-02 | -13.90 | 60.96 | 8.20E-01 |
| cg15233074 | 9.77   | 4.75  | 3.95E-02 | 9.85   | 6.66  | 1.40E-01 | 6.57    | 10.97  | 5.49E-01 | 29.96  | 14.73 | 4.20E-02 | 2.18   | 10.56 | 8.36E-01 |
| cg20541249 | -39.13 | 19.01 | 3.95E-02 | -28.76 | 22.98 | 2.11E-01 | -139.80 | 80.87  | 8.39E-02 | -32.41 | 79.76 | 6.85E-01 | -48.54 | 42.09 | 2.49E-01 |
| cg00290924 | -31.03 | 15.07 | 3.95E-02 | -21.60 | 24.72 | 3.82E-01 | 109.51  | 195.34 | 5.75E-01 | -47.02 | 20.20 | 2.00E-02 | 38.30  | 58.84 | 5.15E-01 |
| cg17983957 | 9.13   | 4.43  | 3.95E-02 | 6.30   | 6.31  | 3.18E-01 | 22.73   | 10.12  | 2.47E-02 | 5.62   | 10.70 | 6.00E-01 | 4.84   | 11.75 | 6.80E-01 |
| cg24689754 | -29.53 | 14.34 | 3.95E-02 | 38.15  | 44.15 | 3.88E-01 | -81.22  | 142.37 | 5.68E-01 | -36.06 | 16.38 | 2.76E-02 | -43.22 | 41.89 | 3.02E-01 |
| cg00951857 | 7.50   | 3.64  | 3.95E-02 | 4.03   | 4.96  | 4.16E-01 | 9.02    | 8.47   | 2.87E-01 | 36.64  | 18.28 | 4.50E-02 | 8.63   | 6.78  | 2.03E-01 |
| cg04913057 | 14.33  | 6.96  | 3.95E-02 | 31.96  | 23.53 | 1.74E-01 | 48.72   | 51.91  | 3.48E-01 | 12.28  | 8.88  | 1.67E-01 | 11.11  | 13.16 | 3.98E-01 |
| cg04582254 | 6.43   | 3.12  | 3.95E-02 | 10.59  | 4.77  | 2.63E-02 | 8.37    | 7.09   | 2.38E-01 | 0.85   | 7.82  | 9.13E-01 | 0.56   | 6.71  | 9.34E-01 |
| cg10936841 | -7.42  | 3.60  | 3.95E-02 | -6.76  | 5.47  | 2.16E-01 | -6.29   | 7.20   | 3.82E-01 | -9.12  | 13.05 | 4.84E-01 | -9.24  | 7.36  | 2.10E-01 |
| cg25286679 | -9.20  | 4.47  | 3.95E-02 | -13.33 | 7.97  | 9.46E-02 | -1.33   | 10.47  | 8.99E-01 | -9.57  | 8.02  | 2.33E-01 | -9.30  | 10.15 | 3.59E-01 |
| cg00649827 | 14.69  | 7.14  | 3.95E-02 | 18.16  | 11.47 | 1.13E-01 | 12.03   | 19.72  | 5.42E-01 | 10.00  | 16.76 | 5.51E-01 | 14.21  | 13.03 | 2.75E-01 |
| cg20799816 | -39.51 | 19.19 | 3.95E-02 | -69.23 | 56.71 | 2.22E-01 | 43.46   | 191.93 | 8.21E-01 | -33.06 | 21.75 | 1.29E-01 | -64.65 | 61.57 | 2.94E-01 |
| cg23997640 | 18.64  | 9.06  | 3.95E-02 | 21.52  | 11.70 | 6.58E-02 | 4.66    | 26.87  | 8.62E-01 | 27.85  | 30.91 | 3.67E-01 | 14.04  | 20.20 | 4.87E-01 |
| cg11746851 | 14.72  | 7.15  | 3.95E-02 | 13.21  | 11.31 | 2.43E-01 | 23.76   | 16.71  | 1.55E-01 | 20.85  | 16.32 | 2.01E-01 | 4.82   | 15.08 | 7.49E-01 |
| cg09687947 | -35.22 | 17.11 | 3.95E-02 | -33.14 | 21.91 | 1.30E-01 | -81.03  | 59.52  | 1.73E-01 | -26.14 | 62.76 | 6.77E-01 | -27.33 | 35.44 | 4.41E-01 |
| cg16111190 | 9.22   | 4.48  | 3.95E-02 | 3.33   | 6.79  | 6.24E-01 | 11.86   | 8.41   | 1.58E-01 | 2.06   | 16.71 | 9.02E-01 | 20.34  | 9.79  | 3.78E-02 |
| cg17081160 | 14.52  | 7.05  | 3.96E-02 | 19.72  | 12.54 | 1.16E-01 | 2.10    | 29.18  | 9.42E-01 | 10.05  | 10.18 | 3.23E-01 | 22.96  | 18.52 | 2.15E-01 |
| cg10094443 | 14.52  | 7.05  | 3.96E-02 | 25.95  | 10.80 | 1.63E-02 | 11.63   | 18.83  | 5.37E-01 | -10.58 | 20.98 | 6.14E-01 | 9.42   | 12.47 | 4.50E-01 |
| cg18093328 | 19.20  | 9.33  | 3.96E-02 | 21.58  | 18.72 | 2.49E-01 | 12.77   | 16.04  | 4.26E-01 | 19.40  | 18.16 | 2.85E-01 | 29.36  | 24.08 | 2.23E-01 |
| cg24430711 | 15.34  | 7.45  | 3.96E-02 | 0.79   | 20.10 | 9.69E-01 | 22.02   | 37.97  | 5.62E-01 | 17.76  | 8.55  | 3.79E-02 | 13.86  | 29.20 | 6.35E-01 |
| cg05258820 | -15.98 | 7.76  | 3.96E-02 | -17.08 | 14.22 | 2.30E-01 | -13.35  | 39.11  | 7.33E-01 | -13.04 | 10.49 | 2.14E-01 | -28.07 | 22.92 | 2.21E-01 |
| cg07474266 | -9.95  | 4.83  | 3.96E-02 | -14.48 | 13.14 | 2.70E-01 | 13.10   | 20.63  | 5.25E-01 | -11.25 | 5.64  | 4.62E-02 | -5.98  | 17.54 | 7.33E-01 |
| cg11373356 | 20.08  | 9.76  | 3.96E-02 | 46.54  | 19.40 | 1.64E-02 | -0.07   | 16.45  | 9.96E-01 | 16.93  | 17.64 | 3.37E-01 | 24.36  | 19.92 | 2.21E-01 |
| cg04165857 | 13.45  | 6.53  | 3.96E-02 | 7.70   | 15.02 | 6.08E-01 | 2.09    | 16.37  | 8.98E-01 | 16.44  | 8.96  | 6.65E-02 | 24.31  | 18.86 | 1.98E-01 |
| cg08479571 | 15.42  | 7.49  | 3.96E-02 | 24.84  | 22.47 | 2.69E-01 | 54.43   | 36.98  | 1.41E-01 | 11.23  | 8.43  | 1.83E-01 | 26.57  | 30.85 | 3.89E-01 |
| cg01874877 | 9.50   | 4.62  | 3.96E-02 | 6.92   | 7.33  | 3.45E-01 | 20.00   | 10.45  | 5.56E-02 | 17.32  | 10.98 | 1.15E-01 | -0.88  | 9.58  | 9.26E-01 |

|            |        |       |          |        |       |          |         |        |          |        |       |          |         |       |          |
|------------|--------|-------|----------|--------|-------|----------|---------|--------|----------|--------|-------|----------|---------|-------|----------|
| cg27104869 | -43.19 | 20.99 | 3.96E-02 | 18.09  | 64.14 | 7.78E-01 | -129.58 | 253.54 | 6.09E-01 | -43.07 | 23.07 | 6.19E-02 | -146.84 | 86.73 | 9.04E-02 |
| cg01386424 | 15.88  | 7.72  | 3.96E-02 | 15.71  | 10.88 | 1.49E-01 | 17.21   | 20.52  | 4.02E-01 | 34.10  | 26.07 | 1.91E-01 | 9.53    | 14.91 | 5.23E-01 |
| cg27271738 | -35.85 | 17.42 | 3.96E-02 | -36.37 | 24.95 | 1.45E-01 | 41.38   | 74.64  | 5.79E-01 | -71.37 | 41.86 | 8.82E-02 | -28.13  | 32.62 | 3.89E-01 |
| cg22870429 | -9.64  | 4.68  | 3.96E-02 | -12.03 | 7.56  | 1.12E-01 | -8.09   | 9.90   | 4.14E-01 | -2.39  | 11.22 | 8.31E-01 | -12.80  | 10.02 | 2.02E-01 |
| cg11827101 | 11.06  | 5.37  | 3.96E-02 | 15.53  | 7.00  | 2.64E-02 | 1.82    | 13.84  | 8.95E-01 | 20.34  | 19.30 | 2.92E-01 | 0.23    | 12.62 | 9.85E-01 |
| cg10554439 | 15.48  | 7.52  | 3.96E-02 | 9.45   | 16.06 | 5.56E-01 | 4.98    | 26.05  | 8.48E-01 | 23.01  | 9.73  | 1.80E-02 | -7.69   | 23.83 | 7.47E-01 |
| cg01944288 | 6.19   | 3.01  | 3.96E-02 | 5.43   | 3.91  | 1.65E-01 | 14.78   | 8.58   | 8.49E-02 | 8.21   | 8.06  | 3.09E-01 | 0.11    | 7.86  | 9.89E-01 |
| cg04861869 | -16.26 | 7.90  | 3.96E-02 | -7.16  | 11.82 | 5.45E-01 | -5.87   | 35.08  | 8.67E-01 | -30.40 | 16.86 | 7.15E-02 | -21.56  | 14.88 | 1.47E-01 |
| cg26581200 | -16.33 | 7.94  | 3.96E-02 | -22.25 | 11.93 | 6.22E-02 | -15.87  | 16.29  | 3.30E-01 | -7.27  | 20.91 | 7.28E-01 | -9.49   | 18.95 | 6.16E-01 |
| cg08365609 | -7.35  | 3.57  | 3.96E-02 | -7.03  | 5.07  | 1.65E-01 | -9.50   | 8.16   | 2.45E-01 | -0.62  | 9.96  | 9.51E-01 | -10.64  | 8.31  | 2.00E-01 |
| cg11663975 | 16.78  | 8.15  | 3.96E-02 | 14.00  | 22.97 | 5.42E-01 | -115.04 | 115.52 | 3.19E-01 | 15.22  | 9.68  | 1.16E-01 | 29.98   | 20.39 | 1.41E-01 |
| cg06907160 | 23.19  | 11.27 | 3.96E-02 | -19.89 | 34.16 | 5.60E-01 | -54.95  | 140.75 | 6.96E-01 | 26.35  | 12.34 | 3.27E-02 | 73.48   | 50.01 | 1.42E-01 |
| cg24789487 | -26.09 | 12.68 | 3.96E-02 | -16.06 | 41.71 | 7.00E-01 | -8.56   | 114.73 | 9.41E-01 | -26.57 | 13.82 | 5.45E-02 | -40.04  | 55.07 | 4.67E-01 |
| cg07000116 | 4.27   | 2.07  | 3.96E-02 | 4.14   | 2.50  | 9.83E-02 | 7.24    | 4.92   | 1.41E-01 | 4.26   | 8.23  | 6.05E-01 | -1.75   | 7.66  | 8.20E-01 |
| cg16355305 | -5.57  | 2.71  | 3.96E-02 | -1.91  | 3.72  | 6.07E-01 | -8.63   | 6.41   | 1.78E-01 | -16.67 | 11.02 | 1.30E-01 | -8.63   | 5.60  | 1.23E-01 |
| cg08767938 | 7.74   | 3.76  | 3.96E-02 | 8.48   | 5.56  | 1.27E-01 | 7.31    | 8.84   | 4.09E-01 | 5.71   | 12.40 | 6.45E-01 | 7.46    | 7.25  | 3.04E-01 |
| cg04014726 | 15.99  | 7.77  | 3.96E-02 | 28.98  | 18.95 | 1.26E-01 | 62.02   | 35.99  | 8.48E-02 | 9.48   | 9.34  | 3.10E-01 | 18.02   | 25.64 | 4.82E-01 |
| cg00915974 | 11.03  | 5.36  | 3.96E-02 | 21.38  | 11.82 | 7.04E-02 | 3.88    | 15.11  | 7.98E-01 | 9.00   | 7.02  | 2.00E-01 | 10.46   | 18.23 | 5.66E-01 |
| cg04420335 | -9.30  | 4.52  | 3.96E-02 | -20.33 | 11.92 | 8.80E-02 | -4.60   | 19.20  | 8.11E-01 | -7.32  | 5.43  | 1.78E-01 | -9.73   | 13.73 | 4.78E-01 |
| cg23861127 | 18.75  | 9.11  | 3.96E-02 | 12.95  | 16.66 | 4.37E-01 | 20.78   | 17.03  | 2.22E-01 | 38.26  | 18.91 | 4.30E-02 | 0.24    | 21.32 | 9.91E-01 |
| cg25708790 | -8.24  | 4.00  | 3.96E-02 | -9.45  | 5.65  | 9.47E-02 | -9.66   | 10.05  | 3.37E-01 | -14.56 | 10.44 | 1.63E-01 | 0.90    | 9.12  | 9.22E-01 |
| cg14023451 | 9.55   | 4.64  | 3.96E-02 | 10.24  | 6.54  | 1.17E-01 | 21.60   | 10.85  | 4.65E-02 | 6.59   | 11.37 | 5.62E-01 | -4.47   | 12.09 | 7.12E-01 |
| cg25937598 | 16.29  | 7.92  | 3.96E-02 | 18.60  | 11.66 | 1.11E-01 | 14.29   | 14.90  | 3.38E-01 | 8.73   | 24.47 | 7.21E-01 | 18.24   | 20.33 | 3.70E-01 |
| cg22920873 | -36.45 | 17.72 | 3.96E-02 | -21.76 | 34.45 | 5.28E-01 | -102.62 | 73.41  | 1.62E-01 | -40.64 | 23.81 | 8.78E-02 | -17.94  | 50.41 | 7.22E-01 |
| cg13708803 | -10.35 | 5.03  | 3.96E-02 | -13.92 | 7.37  | 5.90E-02 | -12.51  | 13.02  | 3.36E-01 | 8.54   | 12.22 | 4.85E-01 | -15.96  | 10.82 | 1.40E-01 |
| cg00056628 | 41.55  | 20.20 | 3.96E-02 | 64.97  | 27.53 | 1.83E-02 | -49.38  | 60.49  | 4.14E-01 | 39.67  | 48.80 | 4.16E-01 | 31.80   | 45.64 | 4.86E-01 |
| cg27413632 | 14.77  | 7.18  | 3.96E-02 | 7.52   | 15.22 | 6.21E-01 | 3.57    | 29.92  | 9.05E-01 | 14.63  | 9.25  | 1.14E-01 | 34.52   | 20.87 | 9.81E-02 |
| cg07386859 | -14.81 | 7.20  | 3.96E-02 | -26.80 | 18.60 | 1.50E-01 | -15.00  | 19.56  | 4.43E-01 | -13.52 | 9.30  | 1.46E-01 | -5.80   | 21.10 | 7.83E-01 |
| cg00581617 | 26.90  | 13.08 | 3.96E-02 | 38.74  | 22.45 | 8.44E-02 | 59.74   | 40.91  | 1.44E-01 | 7.02   | 11.97 | 5.58E-01 | 53.96   | 30.18 | 7.38E-02 |
| cg04930693 | 12.05  | 5.86  | 3.96E-02 | 3.30   | 15.28 | 8.29E-01 | 5.70    | 20.88  | 7.85E-01 | 13.82  | 6.95  | 4.69E-02 | 20.16   | 22.92 | 3.79E-01 |
| cg22097891 | 7.00   | 3.40  | 3.96E-02 | 1.82   | 7.60  | 8.11E-01 | -5.67   | 13.78  | 6.81E-01 | 8.41   | 4.23  | 4.70E-02 | 16.71   | 11.18 | 1.35E-01 |
| cg01433913 | 22.64  | 11.01 | 3.97E-02 | 31.36  | 19.93 | 1.16E-01 | 36.80   | 20.48  | 7.24E-02 | 3.15   | 21.08 | 8.81E-01 | 11.94   | 30.13 | 6.92E-01 |
| cg02557133 | 16.30  | 7.93  | 3.97E-02 | 24.09  | 14.25 | 9.10E-02 | 8.75    | 14.58  | 5.48E-01 | 7.68   | 15.20 | 6.13E-01 | 33.85   | 22.54 | 1.33E-01 |
| cg07367434 | -52.35 | 25.45 | 3.97E-02 | -76.07 | 69.85 | 2.76E-01 | -404.25 | 294.21 | 1.69E-01 | -36.40 | 29.55 | 2.18E-01 | -103.48 | 74.01 | 1.62E-01 |
| cg16379283 | 20.05  | 9.74  | 3.97E-02 | 7.22   | 15.50 | 6.41E-01 | 46.15   | 53.22  | 3.86E-01 | 28.67  | 33.27 | 3.89E-01 | 27.17   | 13.99 | 5.21E-02 |



|            |        |       |          |        |       |          |        |        |          |        |       |          |        |       |          |
|------------|--------|-------|----------|--------|-------|----------|--------|--------|----------|--------|-------|----------|--------|-------|----------|
| cg10149889 | 15.49  | 7.53  | 3.97E-02 | 36.07  | 20.66 | 8.07E-02 | 55.28  | 43.57  | 2.05E-01 | 11.06  | 8.55  | 1.96E-01 | 7.54   | 30.24 | 8.03E-01 |
| cg15179725 | 25.68  | 12.48 | 3.97E-02 | 31.68  | 50.93 | 5.34E-01 | -94.57 | 141.53 | 5.04E-01 | 30.43  | 13.37 | 2.29E-02 | -33.15 | 50.74 | 5.14E-01 |
| cg23414759 | -7.49  | 3.64  | 3.97E-02 | -18.88 | 8.92  | 3.44E-02 | -15.21 | 19.33  | 4.31E-01 | -4.03  | 4.42  | 3.62E-01 | -8.98  | 10.54 | 3.94E-01 |
| cg02967125 | 24.20  | 11.76 | 3.97E-02 | 58.23  | 21.70 | 7.29E-03 | 23.19  | 29.00  | 4.24E-01 | 10.12  | 8.71  | 2.45E-01 | 27.13  | 29.63 | 3.60E-01 |
| cg12241532 | 57.34  | 27.87 | 3.97E-02 | 94.93  | 26.18 | 2.87E-04 | -10.66 | 51.89  | 8.37E-01 | -1.69  | 47.81 | 9.72E-01 | 98.84  | 35.64 | 5.55E-03 |
| cg10752508 | 4.72   | 2.29  | 3.97E-02 | 6.55   | 3.34  | 4.97E-02 | 8.18   | 5.61   | 1.45E-01 | 2.99   | 4.70  | 5.25E-01 | -3.75  | 6.57  | 5.68E-01 |
| cg03947814 | 6.32   | 3.07  | 3.97E-02 | 2.80   | 5.11  | 5.83E-01 | 12.25  | 7.37   | 9.66E-02 | 9.77   | 6.68  | 1.43E-01 | 4.38   | 6.10  | 4.72E-01 |
| cg04293778 | 10.22  | 4.97  | 3.97E-02 | 6.85   | 7.27  | 3.46E-01 | 1.20   | 13.31  | 9.28E-01 | 19.13  | 12.59 | 1.29E-01 | 16.31  | 10.20 | 1.10E-01 |
| cg12305074 | -7.47  | 3.63  | 3.97E-02 | -4.72  | 7.88  | 5.49E-01 | 4.12   | 13.12  | 7.54E-01 | -7.65  | 4.67  | 1.02E-01 | -20.12 | 11.06 | 6.88E-02 |
| cg10576132 | -9.47  | 4.60  | 3.97E-02 | -20.17 | 10.87 | 6.36E-02 | -10.99 | 10.15  | 2.79E-01 | -3.38  | 6.72  | 6.15E-01 | -13.75 | 12.04 | 2.54E-01 |
| cg14568203 | -15.70 | 7.63  | 3.97E-02 | -37.32 | 14.95 | 1.26E-02 | -11.43 | 21.19  | 5.90E-01 | -5.76  | 9.19  | 5.30E-01 | -21.08 | 20.84 | 3.12E-01 |
| cg17838754 | 12.58  | 6.12  | 3.97E-02 | 9.95   | 12.87 | 4.39E-01 | 0.68   | 14.15  | 9.62E-01 | 13.61  | 8.85  | 1.24E-01 | 33.81  | 18.48 | 6.73E-02 |
| cg02270765 | -9.11  | 4.43  | 3.97E-02 | -3.01  | 7.73  | 6.97E-01 | -4.89  | 12.69  | 7.00E-01 | -17.70 | 6.72  | 8.47E-03 | 1.22   | 12.98 | 9.25E-01 |
| cg22864755 | 15.70  | 7.63  | 3.97E-02 | -9.40  | 20.45 | 6.46E-01 | -6.86  | 31.15  | 8.26E-01 | 21.62  | 8.88  | 1.49E-02 | 23.52  | 30.90 | 4.46E-01 |
| cg02376827 | 10.15  | 4.94  | 3.97E-02 | 6.59   | 5.60  | 2.39E-01 | 11.48  | 10.45  | 2.72E-01 | 34.56  | 14.52 | 1.73E-02 | 4.36   | 10.93 | 6.90E-01 |
| cg26831416 | 5.11   | 2.48  | 3.97E-02 | 3.14   | 2.99  | 2.94E-01 | 12.09  | 6.99   | 8.36E-02 | 12.84  | 9.36  | 1.70E-01 | 4.48   | 7.30  | 5.40E-01 |
| cg27514730 | -10.78 | 5.24  | 3.97E-02 | -17.11 | 7.85  | 2.93E-02 | -9.84  | 12.65  | 4.36E-01 | 0.00   | 14.29 | 1.00E+00 | -5.91  | 10.51 | 5.74E-01 |
| cg02980499 | -13.08 | 6.36  | 3.97E-02 | -0.43  | 17.37 | 9.80E-01 | -9.98  | 26.58  | 7.07E-01 | -16.15 | 7.38  | 2.87E-02 | -7.05  | 24.56 | 7.74E-01 |
| cg11898646 | 18.97  | 9.22  | 3.97E-02 | -5.08  | 16.24 | 7.55E-01 | 9.40   | 29.02  | 7.46E-01 | 24.17  | 7.76  | 1.85E-03 | 45.57  | 22.55 | 4.33E-02 |
| cg06523916 | 26.51  | 12.89 | 3.97E-02 | 26.35  | 16.87 | 1.18E-01 | 1.44   | 63.05  | 9.82E-01 | -25.24 | 51.43 | 6.24E-01 | 40.57  | 23.07 | 7.86E-02 |
| cg23034014 | 9.57   | 4.65  | 3.97E-02 | -2.38  | 12.15 | 8.45E-01 | -1.18  | 17.94  | 9.48E-01 | 12.28  | 5.53  | 2.63E-02 | 16.66  | 16.66 | 3.17E-01 |
| cg05046821 | -41.12 | 19.99 | 3.97E-02 | -40.37 | 25.01 | 1.07E-01 | -15.33 | 127.82 | 9.05E-01 | -12.29 | 70.31 | 8.61E-01 | -54.55 | 39.52 | 1.67E-01 |
| cg21293831 | 38.73  | 18.83 | 3.97E-02 | 50.81  | 26.68 | 5.68E-02 | 71.15  | 64.13  | 2.67E-01 | 28.72  | 46.66 | 5.38E-01 | 10.31  | 37.45 | 7.83E-01 |
| cg01571001 | 4.32   | 2.10  | 3.97E-02 | 7.20   | 2.95  | 1.48E-02 | -1.81  | 4.60   | 6.94E-01 | 5.30   | 6.71  | 4.30E-01 | 2.87   | 4.86  | 5.55E-01 |
| cg27493772 | -13.85 | 6.74  | 3.97E-02 | -25.97 | 11.05 | 1.87E-02 | -11.31 | 15.25  | 4.58E-01 | -1.03  | 14.97 | 9.45E-01 | -7.73  | 14.02 | 5.82E-01 |
| cg08408971 | -13.46 | 6.55  | 3.97E-02 | -25.97 | 9.84  | 8.31E-03 | -6.60  | 14.61  | 6.52E-01 | -5.89  | 18.50 | 7.50E-01 | 0.06   | 13.48 | 9.96E-01 |
| cg04053392 | 15.76  | 7.66  | 3.97E-02 | 14.00  | 16.51 | 3.96E-01 | 14.24  | 29.01  | 6.23E-01 | 26.06  | 12.11 | 3.15E-02 | 4.20   | 13.66 | 7.58E-01 |
| cg02185052 | 12.15  | 5.91  | 3.97E-02 | 19.49  | 8.31  | 1.90E-02 | 10.28  | 15.47  | 5.06E-01 | 21.57  | 23.50 | 3.59E-01 | -2.00  | 11.06 | 8.57E-01 |
| cg10035234 | 14.81  | 7.20  | 3.97E-02 | 40.73  | 19.34 | 3.52E-02 | -3.24  | 29.47  | 9.12E-01 | 11.15  | 8.41  | 1.85E-01 | 17.24  | 27.51 | 5.31E-01 |
| cg09275986 | 6.32   | 3.07  | 3.98E-02 | 7.24   | 4.24  | 8.74E-02 | 4.85   | 8.57   | 5.71E-01 | 8.77   | 8.17  | 2.83E-01 | 3.16   | 6.80  | 6.42E-01 |
| cg01057573 | 4.87   | 2.37  | 3.98E-02 | 3.59   | 3.27  | 2.72E-01 | 13.93  | 5.92   | 1.86E-02 | 3.57   | 5.48  | 5.15E-01 | 0.69   | 6.62  | 9.17E-01 |
| cg23656268 | -9.83  | 4.78  | 3.98E-02 | -19.67 | 7.64  | 9.98E-03 | -8.87  | 9.66   | 3.58E-01 | -5.28  | 8.08  | 5.14E-01 | 5.99   | 14.03 | 6.69E-01 |
| cg01385327 | 18.37  | 8.93  | 3.98E-02 | 17.00  | 11.49 | 1.39E-01 | -10.82 | 29.02  | 7.09E-01 | 38.57  | 36.72 | 2.94E-01 | 28.32  | 18.19 | 1.19E-01 |
| cg27419119 | 38.35  | 18.65 | 3.98E-02 | 41.29  | 29.79 | 1.66E-01 | 38.41  | 41.72  | 3.57E-01 | 38.11  | 61.22 | 5.34E-01 | 34.74  | 33.22 | 2.96E-01 |
| cg23922259 | 12.53  | 6.09  | 3.98E-02 | 19.71  | 14.51 | 1.74E-01 | 20.47  | 16.91  | 2.26E-01 | 8.26   | 11.69 | 4.80E-01 | 9.83   | 9.37  | 2.94E-01 |

|             |        |       |          |        |       |          |        |        |          |        |       |          |        |       |          |
|-------------|--------|-------|----------|--------|-------|----------|--------|--------|----------|--------|-------|----------|--------|-------|----------|
| cg02417473  | -9.62  | 4.68  | 3.98E-02 | -11.70 | 6.41  | 6.81E-02 | -9.47  | 10.55  | 3.69E-01 | -5.51  | 16.78 | 7.43E-01 | -5.69  | 10.61 | 5.92E-01 |
| cg02505267  | 21.64  | 10.53 | 3.98E-02 | -2.27  | 23.10 | 9.22E-01 | 70.42  | 69.95  | 3.14E-01 | 30.36  | 12.61 | 1.61E-02 | -8.61  | 38.90 | 8.25E-01 |
| cg06106510  | -14.20 | 6.91  | 3.98E-02 | -30.71 | 18.52 | 9.74E-02 | -32.84 | 29.94  | 2.73E-01 | -11.15 | 7.99  | 1.63E-01 | 2.48   | 28.16 | 9.30E-01 |
| cg14550422  | -36.57 | 17.78 | 3.98E-02 | -18.55 | 23.40 | 4.28E-01 | -26.89 | 52.82  | 6.11E-01 | -62.05 | 72.16 | 3.90E-01 | -76.66 | 35.69 | 3.17E-02 |
| cg05796909  | 56.53  | 27.49 | 3.98E-02 | 117.12 | 53.84 | 2.96E-02 | 100.38 | 233.77 | 6.68E-01 | 19.97  | 27.78 | 4.72E-01 | 102.94 | 63.61 | 1.06E-01 |
| cg25648267  | 11.79  | 5.74  | 3.98E-02 | 37.90  | 17.09 | 2.66E-02 | 15.07  | 18.58  | 4.17E-01 | 5.96   | 7.65  | 4.35E-01 | 11.90  | 11.97 | 3.20E-01 |
| cg27563985  | 6.84   | 3.33  | 3.98E-02 | 8.35   | 5.19  | 1.08E-01 | 2.09   | 8.75   | 8.12E-01 | 12.23  | 6.35  | 5.41E-02 | -1.51  | 8.09  | 8.52E-01 |
| cg13180722  | 10.29  | 5.01  | 3.98E-02 | 16.33  | 7.01  | 1.99E-02 | 5.43   | 11.18  | 6.27E-01 | -3.62  | 21.86 | 8.68E-01 | 4.50   | 10.29 | 6.62E-01 |
| cg04562589  | 13.42  | 6.53  | 3.98E-02 | 20.57  | 9.30  | 2.70E-02 | 4.07   | 18.28  | 8.24E-01 | 36.09  | 21.33 | 9.06E-02 | 1.85   | 10.54 | 8.61E-01 |
| cg08617354  | 11.20  | 5.45  | 3.98E-02 | 23.46  | 11.82 | 4.71E-02 | 5.44   | 12.82  | 6.72E-01 | 10.25  | 7.64  | 1.80E-01 | 0.27   | 17.27 | 9.88E-01 |
| cg07204163  | 25.30  | 12.30 | 3.98E-02 | 49.65  | 19.59 | 1.13E-02 | 2.99   | 18.88  | 8.74E-01 | 11.80  | 10.34 | 2.54E-01 | 58.29  | 26.84 | 2.99E-02 |
| cg18178595  | 19.11  | 9.29  | 3.98E-02 | 35.58  | 19.00 | 6.11E-02 | 26.49  | 17.19  | 1.23E-01 | -2.92  | 16.75 | 8.61E-01 | 23.38  | 23.20 | 3.13E-01 |
| cg12247968  | -16.94 | 8.24  | 3.98E-02 | -23.21 | 12.86 | 7.12E-02 | -27.71 | 19.75  | 1.61E-01 | -5.09  | 20.09 | 8.00E-01 | -7.02  | 16.58 | 6.72E-01 |
| cg15796941  | 23.58  | 11.47 | 3.98E-02 | 11.90  | 11.45 | 2.99E-01 | 77.59  | 58.06  | 1.81E-01 | 28.90  | 29.93 | 3.34E-01 | 57.28  | 28.45 | 4.41E-02 |
| cg01043370  | 39.14  | 19.04 | 3.98E-02 | 58.90  | 24.64 | 1.68E-02 | -51.61 | 118.50 | 6.63E-01 | 36.40  | 59.10 | 5.38E-01 | 5.58   | 36.42 | 8.78E-01 |
| cg15244101  | 6.76   | 3.29  | 3.98E-02 | 6.31   | 4.30  | 1.42E-01 | 11.35  | 8.08   | 1.60E-01 | 7.43   | 8.89  | 4.04E-01 | 1.50   | 9.83  | 8.79E-01 |
| cg15764975  | 26.92  | 13.10 | 3.98E-02 | 10.66  | 23.66 | 6.52E-01 | 8.70   | 42.16  | 8.36E-01 | 48.42  | 20.04 | 1.57E-02 | 12.56  | 31.74 | 6.92E-01 |
| cg16457842  | 8.52   | 4.14  | 3.98E-02 | 2.35   | 5.60  | 6.75E-01 | 4.74   | 8.68   | 5.85E-01 | 15.63  | 9.96  | 1.17E-01 | 18.93  | 8.38  | 2.40E-02 |
| cg14225090  | -15.78 | 7.68  | 3.98E-02 | -39.83 | 15.88 | 1.22E-02 | -21.01 | 20.47  | 3.05E-01 | -8.44  | 8.97  | 3.47E-01 | -3.30  | 19.07 | 8.63E-01 |
| cg01295999  | -13.14 | 6.39  | 3.98E-02 | -30.72 | 14.23 | 3.08E-02 | -23.49 | 26.29  | 3.72E-01 | -10.29 | 7.61  | 1.76E-01 | 9.57   | 20.32 | 6.38E-01 |
| cg21949830  | -15.92 | 7.75  | 3.98E-02 | -19.65 | 11.10 | 7.68E-02 | 13.42  | 15.74  | 3.94E-01 | -19.80 | 10.89 | 6.89E-02 | -28.64 | 12.75 | 2.47E-02 |
| cg17379828  | 20.00  | 9.73  | 3.98E-02 | 28.91  | 16.42 | 7.82E-02 | 39.49  | 17.22  | 2.18E-02 | -2.28  | 15.66 | 8.84E-01 | 14.75  | 23.08 | 5.23E-01 |
| cg15025536  | -17.73 | 8.62  | 3.98E-02 | -23.17 | 16.02 | 1.48E-01 | 18.63  | 51.00  | 7.15E-01 | -18.35 | 11.05 | 9.68E-02 | -5.08  | 32.02 | 8.74E-01 |
| cg04444415  | 4.85   | 2.36  | 3.98E-02 | 5.84   | 4.19  | 1.63E-01 | 2.52   | 5.87   | 6.67E-01 | 4.25   | 3.89  | 2.75E-01 | 6.78   | 6.08  | 2.65E-01 |
| cg15967131  | 22.11  | 10.76 | 3.98E-02 | 29.39  | 18.52 | 1.12E-01 | -33.44 | 62.05  | 5.90E-01 | 26.67  | 14.73 | 7.02E-02 | -10.35 | 34.13 | 7.62E-01 |
| cg011130364 | 20.80  | 10.12 | 3.98E-02 | 10.96  | 15.19 | 4.71E-01 | 31.03  | 29.83  | 2.98E-01 | 25.51  | 22.25 | 2.51E-01 | 30.25  | 20.91 | 1.48E-01 |
| cg05758139  | 18.63  | 9.07  | 3.98E-02 | 5.36   | 20.98 | 7.98E-01 | 73.35  | 35.43  | 3.84E-02 | 16.41  | 11.09 | 1.39E-01 | 23.37  | 32.04 | 4.66E-01 |
| cg12108555  | 13.29  | 6.47  | 3.99E-02 | 22.87  | 17.45 | 1.90E-01 | 7.80   | 27.19  | 7.74E-01 | 13.06  | 7.55  | 8.37E-02 | 1.81   | 23.97 | 9.40E-01 |
| cg03225787  | -8.98  | 4.37  | 3.99E-02 | -16.08 | 9.33  | 8.49E-02 | -0.88  | 13.82  | 9.49E-01 | -6.45  | 5.94  | 2.78E-01 | -13.44 | 11.69 | 2.50E-01 |
| cg22451140  | 13.68  | 6.66  | 3.99E-02 | 23.45  | 17.24 | 1.74E-01 | -19.91 | 37.43  | 5.95E-01 | 15.65  | 7.67  | 4.14E-02 | -14.81 | 25.95 | 5.68E-01 |
| cg22882902  | 8.22   | 4.00  | 3.99E-02 | 11.04  | 5.38  | 4.00E-02 | 13.97  | 9.03   | 1.22E-01 | -3.28  | 12.89 | 7.99E-01 | -2.07  | 10.21 | 8.39E-01 |
| cg09403480  | -10.89 | 5.30  | 3.99E-02 | -17.74 | 8.49  | 3.67E-02 | -15.11 | 13.41  | 2.60E-01 | 1.01   | 9.60  | 9.16E-01 | -12.81 | 13.63 | 3.47E-01 |
| cg06629702  | -6.42  | 3.12  | 3.99E-02 | -5.18  | 4.42  | 2.42E-01 | -10.15 | 7.07   | 1.51E-01 | -12.37 | 11.00 | 2.61E-01 | -3.81  | 6.56  | 5.62E-01 |
| cg05999287  | 30.57  | 14.88 | 3.99E-02 | 53.62  | 48.89 | 2.73E-01 | -24.00 | 145.81 | 8.69E-01 | 27.76  | 16.69 | 9.63E-02 | 37.15  | 46.50 | 4.24E-01 |
| cg23322292  | 35.38  | 17.22 | 3.99E-02 | 23.92  | 22.56 | 2.89E-01 | -41.14 | 99.66  | 6.80E-01 | 9.30   | 68.60 | 8.92E-01 | 68.03  | 30.21 | 2.43E-02 |

|            |        |       |          |        |       |          |         |        |          |        |       |          |        |       |          |
|------------|--------|-------|----------|--------|-------|----------|---------|--------|----------|--------|-------|----------|--------|-------|----------|
| cg03718824 | 19.94  | 9.70  | 3.99E-02 | 28.80  | 24.97 | 2.49E-01 | 6.45    | 40.40  | 8.73E-01 | 21.24  | 12.42 | 8.73E-02 | 12.47  | 22.83 | 5.85E-01 |
| cg10237817 | 17.58  | 8.56  | 3.99E-02 | 23.19  | 15.90 | 1.45E-01 | 27.34   | 18.73  | 1.44E-01 | 6.15   | 13.57 | 6.50E-01 | 26.13  | 26.57 | 3.25E-01 |
| cg07485775 | 8.77   | 4.27  | 3.99E-02 | 1.47   | 6.56  | 8.23E-01 | 13.64   | 7.81   | 8.06E-02 | 16.02  | 12.57 | 2.02E-01 | 13.73  | 10.61 | 1.96E-01 |
| cg19286687 | -11.45 | 5.57  | 3.99E-02 | -22.46 | 8.58  | 8.84E-03 | -5.40   | 12.34  | 6.62E-01 | -4.17  | 14.80 | 7.78E-01 | -1.24  | 11.54 | 9.15E-01 |
| cg18198143 | 19.84  | 9.66  | 3.99E-02 | 47.19  | 24.11 | 5.03E-02 | -21.69  | 46.99  | 6.44E-01 | 16.51  | 11.46 | 1.50E-01 | 16.77  | 32.69 | 6.08E-01 |
| cg09810078 | 7.27   | 3.54  | 3.99E-02 | 3.43   | 4.94  | 4.87E-01 | 12.84   | 7.51   | 8.75E-02 | -0.29  | 11.97 | 9.81E-01 | 15.15  | 8.40  | 7.13E-02 |
| cg27582546 | -8.86  | 4.31  | 3.99E-02 | -16.36 | 6.02  | 6.56E-03 | -9.74   | 11.92  | 4.14E-01 | -0.12  | 5.75  | 9.84E-01 | -11.67 | 9.19  | 2.04E-01 |
| cg15287047 | -14.33 | 6.98  | 3.99E-02 | -17.12 | 13.23 | 1.95E-01 | -25.26  | 36.49  | 4.89E-01 | -13.19 | 8.88  | 1.37E-01 | -7.44  | 26.82 | 7.82E-01 |
| cg14353422 | 15.03  | 7.32  | 3.99E-02 | 8.06   | 21.51 | 7.08E-01 | 39.62   | 32.07  | 2.17E-01 | 11.91  | 8.35  | 1.54E-01 | 45.07  | 28.87 | 1.18E-01 |
| cg00949386 | -8.11  | 3.95  | 3.99E-02 | -12.44 | 9.16  | 1.74E-01 | -7.55   | 13.92  | 5.88E-01 | -9.04  | 5.07  | 7.44E-02 | 2.25   | 11.04 | 8.38E-01 |
| cg21079946 | -12.92 | 6.29  | 3.99E-02 | -21.33 | 10.29 | 3.82E-02 | -1.01   | 13.89  | 9.42E-01 | -12.05 | 13.52 | 3.73E-01 | -10.45 | 13.85 | 4.51E-01 |
| cg23582982 | 7.59   | 3.69  | 3.99E-02 | 5.57   | 4.60  | 2.26E-01 | 11.33   | 8.61   | 1.88E-01 | 15.78  | 12.42 | 2.04E-01 | 6.24   | 12.92 | 6.29E-01 |
| cg04393391 | 26.43  | 12.86 | 3.99E-02 | 23.37  | 16.64 | 1.60E-01 | 12.79   | 60.28  | 8.32E-01 | 91.58  | 69.58 | 1.88E-01 | 27.12  | 22.65 | 2.31E-01 |
| cg15773090 | -22.98 | 11.18 | 3.99E-02 | -3.57  | 32.48 | 9.13E-01 | -148.18 | 100.49 | 1.40E-01 | -24.35 | 12.52 | 5.18E-02 | -18.15 | 41.85 | 6.65E-01 |
| cg00182421 | -6.40  | 3.11  | 3.99E-02 | -2.17  | 7.08  | 7.60E-01 | -4.61   | 11.96  | 7.00E-01 | -6.60  | 3.91  | 9.16E-02 | -14.25 | 9.66  | 1.40E-01 |
| cg06856720 | 9.62   | 4.68  | 3.99E-02 | 13.91  | 6.42  | 3.03E-02 | 7.39    | 11.50  | 5.20E-01 | 12.96  | 17.89 | 4.69E-01 | 0.47   | 9.68  | 9.61E-01 |
| cg11753311 | 16.15  | 7.86  | 3.99E-02 | 13.77  | 17.58 | 4.33E-01 | 36.44   | 66.98  | 5.86E-01 | 14.03  | 9.36  | 1.34E-01 | 36.93  | 27.54 | 1.80E-01 |
| cg10288772 | -35.71 | 17.38 | 3.99E-02 | -33.47 | 22.90 | 1.44E-01 | -20.30  | 49.90  | 6.84E-01 | 31.52  | 59.38 | 5.95E-01 | -76.93 | 37.35 | 3.94E-02 |
| cg05415606 | 6.88   | 3.35  | 3.99E-02 | 10.58  | 4.36  | 1.51E-02 | -0.09   | 7.52   | 9.90E-01 | 3.08   | 11.06 | 7.80E-01 | 3.05   | 9.64  | 7.52E-01 |
| cg07209546 | 16.10  | 7.84  | 3.99E-02 | 51.11  | 25.55 | 4.55E-02 | 51.70   | 110.64 | 6.40E-01 | 11.72  | 8.75  | 1.80E-01 | 16.55  | 24.97 | 5.08E-01 |
| cg19456938 | -9.74  | 4.74  | 3.99E-02 | -6.91  | 6.54  | 2.91E-01 | -26.42  | 14.49  | 6.81E-02 | -10.63 | 13.63 | 4.35E-01 | -8.10  | 9.57  | 3.98E-01 |
| cg10274029 | -7.67  | 3.73  | 3.99E-02 | -7.91  | 4.85  | 1.03E-01 | -10.51  | 11.27  | 3.51E-01 | -0.97  | 11.19 | 9.31E-01 | -9.26  | 8.68  | 2.86E-01 |
| cg06397424 | 25.52  | 12.42 | 3.99E-02 | 23.08  | 15.55 | 1.38E-01 | 71.85   | 54.89  | 1.91E-01 | 74.59  | 80.58 | 3.55E-01 | 18.60  | 23.20 | 4.23E-01 |
| cg01413632 | 8.72   | 4.25  | 3.99E-02 | 4.04   | 9.04  | 6.55E-01 | -2.81   | 9.64   | 7.71E-01 | 15.44  | 6.42  | 1.62E-02 | 10.95  | 11.04 | 3.21E-01 |
| cg14470803 | -8.06  | 3.92  | 3.99E-02 | -5.54  | 5.24  | 2.91E-01 | -10.08  | 11.08  | 3.63E-01 | -5.50  | 20.09 | 7.84E-01 | -12.62 | 7.46  | 9.09E-02 |
| cg14592365 | -8.95  | 4.36  | 3.99E-02 | -9.57  | 6.02  | 1.12E-01 | -7.17   | 12.21  | 5.57E-01 | 4.69   | 11.69 | 6.88E-01 | -17.55 | 9.52  | 6.54E-02 |
| cg24864161 | -4.46  | 2.17  | 4.00E-02 | -6.44  | 3.23  | 4.60E-02 | -6.92   | 5.37   | 1.97E-01 | 1.87   | 5.09  | 7.13E-01 | -3.73  | 4.81  | 4.38E-01 |
| cg16779498 | -5.24  | 2.55  | 4.00E-02 | -5.99  | 3.75  | 1.11E-01 | -1.87   | 5.17   | 7.17E-01 | -11.56 | 7.91  | 1.44E-01 | -4.28  | 5.83  | 4.63E-01 |
| cg13372513 | 10.98  | 5.34  | 4.00E-02 | 10.28  | 14.84 | 4.88E-01 | 33.17   | 27.76  | 2.32E-01 | 8.80   | 6.27  | 1.60E-01 | 19.06  | 16.45 | 2.47E-01 |
| cg22806341 | 20.86  | 10.15 | 4.00E-02 | 25.31  | 15.96 | 1.13E-01 | 11.97   | 24.64  | 6.27E-01 | -6.59  | 19.58 | 7.37E-01 | 40.36  | 15.90 | 1.12E-02 |
| cg21645752 | 13.44  | 6.54  | 4.00E-02 | 12.16  | 15.17 | 4.23E-01 | -5.11   | 32.19  | 8.74E-01 | 12.86  | 7.82  | 1.00E-01 | 33.00  | 24.34 | 1.75E-01 |
| cg06249753 | -8.16  | 3.98  | 4.00E-02 | -1.35  | 9.48  | 8.87E-01 | -1.23   | 16.26  | 9.40E-01 | -8.70  | 4.90  | 7.59E-02 | -19.91 | 12.14 | 1.01E-01 |
| cg23606623 | 27.38  | 13.33 | 4.00E-02 | 28.06  | 17.49 | 1.09E-01 | 44.86   | 59.17  | 4.48E-01 | 38.11  | 42.65 | 3.72E-01 | 18.77  | 25.62 | 4.64E-01 |
| cg05822017 | 14.13  | 6.88  | 4.00E-02 | 4.21   | 10.47 | 6.88E-01 | 29.17   | 13.20  | 2.71E-02 | 27.41  | 19.09 | 1.51E-01 | 5.00   | 16.82 | 7.66E-01 |
| cg21222888 | -7.24  | 3.52  | 4.00E-02 | -3.96  | 7.88  | 6.16E-01 | -14.50  | 10.69  | 1.75E-01 | -9.59  | 4.65  | 3.92E-02 | 5.37   | 10.26 | 6.01E-01 |

|            |        |       |          |        |       |          |         |        |          |        |       |          |        |       |          |
|------------|--------|-------|----------|--------|-------|----------|---------|--------|----------|--------|-------|----------|--------|-------|----------|
| cg17073273 | 14.01  | 6.82  | 4.00E-02 | 26.73  | 23.00 | 2.45E-01 | 46.34   | 78.88  | 5.57E-01 | 14.17  | 7.36  | 5.43E-02 | -18.20 | 31.61 | 5.65E-01 |
| cg13990976 | 30.37  | 14.79 | 4.00E-02 | 31.34  | 25.43 | 2.18E-01 | -25.81  | 66.18  | 6.96E-01 | 16.32  | 23.03 | 4.78E-01 | 71.69  | 33.06 | 3.01E-02 |
| cg12192566 | -9.68  | 4.71  | 4.00E-02 | -12.75 | 6.86  | 6.29E-02 | -5.88   | 11.12  | 5.97E-01 | 2.78   | 11.28 | 8.06E-01 | -17.84 | 11.34 | 1.16E-01 |
| cg09229931 | 19.34  | 9.42  | 4.00E-02 | 7.15   | 20.28 | 7.24E-01 | 4.31    | 36.25  | 9.05E-01 | 21.73  | 12.36 | 7.86E-02 | 35.93  | 25.54 | 1.59E-01 |
| cg07364781 | 30.01  | 14.61 | 4.00E-02 | 17.57  | 20.97 | 4.02E-01 | 30.88   | 36.22  | 3.94E-01 | 56.38  | 51.04 | 2.69E-01 | 43.84  | 28.12 | 1.19E-01 |
| cg08864944 | 6.94   | 3.38  | 4.00E-02 | 9.39   | 4.54  | 3.86E-02 | 4.39    | 9.34   | 6.38E-01 | 14.23  | 8.70  | 1.02E-01 | -3.89  | 7.69  | 6.13E-01 |
| cg13656149 | 16.87  | 8.21  | 4.00E-02 | 35.29  | 19.40 | 6.89E-02 | 2.55    | 24.19  | 9.16E-01 | 18.93  | 10.36 | 6.77E-02 | -21.46 | 29.64 | 4.69E-01 |
| cg23625106 | -18.51 | 9.01  | 4.00E-02 | -32.39 | 14.53 | 2.58E-02 | -26.11  | 36.88  | 4.79E-01 | -12.08 | 15.83 | 4.45E-01 | -2.45  | 18.75 | 8.96E-01 |
| cg22344727 | 19.00  | 9.25  | 4.00E-02 | 28.72  | 15.53 | 6.44E-02 | 29.69   | 31.20  | 3.41E-01 | 11.35  | 16.54 | 4.93E-01 | 10.83  | 18.71 | 5.63E-01 |
| cg00173799 | 6.71   | 3.27  | 4.00E-02 | 3.20   | 7.52  | 6.71E-01 | 19.54   | 10.50  | 6.27E-02 | 4.45   | 4.23  | 2.93E-01 | 13.24  | 9.52  | 1.64E-01 |
| cg23881962 | 5.87   | 2.86  | 4.00E-02 | 5.10   | 5.34  | 3.40E-01 | 11.73   | 12.92  | 3.64E-01 | 5.32   | 3.67  | 1.47E-01 | 10.55  | 11.96 | 3.78E-01 |
| cg17013990 | 4.70   | 2.29  | 4.00E-02 | 3.27   | 3.07  | 2.87E-01 | 7.90    | 5.04   | 1.17E-01 | 6.96   | 6.10  | 2.54E-01 | 2.83   | 7.26  | 6.96E-01 |
| cg05961272 | -16.47 | 8.02  | 4.00E-02 | -16.95 | 13.30 | 2.03E-01 | -29.45  | 14.27  | 3.91E-02 | 9.08   | 20.79 | 6.62E-01 | -13.72 | 19.32 | 4.78E-01 |
| cg01110759 | 23.29  | 11.34 | 4.00E-02 | 27.96  | 22.95 | 2.23E-01 | 36.73   | 34.17  | 2.82E-01 | 26.09  | 16.95 | 1.24E-01 | 3.72   | 25.50 | 8.84E-01 |
| cg02570354 | 7.01   | 3.41  | 4.00E-02 | 4.81   | 3.78  | 2.04E-01 | 16.67   | 7.96   | 3.62E-02 | 14.41  | 8.79  | 1.01E-01 | -0.54  | 7.23  | 9.40E-01 |
| cg25720804 | 12.90  | 6.28  | 4.00E-02 | -1.60  | 13.34 | 9.04E-01 | -1.88   | 16.16  | 9.07E-01 | 21.06  | 8.79  | 1.66E-02 | 20.70  | 13.91 | 1.37E-01 |
| cg24028161 | 29.29  | 14.26 | 4.00E-02 | 3.25   | 51.18 | 9.49E-01 | -171.29 | 191.39 | 3.71E-01 | 35.34  | 15.44 | 2.21E-02 | -2.89  | 56.91 | 9.59E-01 |
| cg15580458 | 6.13   | 2.98  | 4.00E-02 | 5.56   | 3.89  | 1.54E-01 | 12.04   | 6.90   | 8.13E-02 | 3.11   | 9.46  | 7.42E-01 | 2.44   | 8.39  | 7.71E-01 |
| cg07171864 | -12.37 | 6.03  | 4.00E-02 | -3.71  | 14.97 | 8.04E-01 | 9.93    | 38.05  | 7.94E-01 | -18.02 | 7.23  | 1.26E-02 | 4.35   | 17.59 | 8.05E-01 |
| cg11966803 | -14.12 | 6.88  | 4.00E-02 | -35.26 | 18.67 | 5.89E-02 | -8.08   | 37.60  | 8.30E-01 | -11.38 | 7.80  | 1.45E-01 | -4.20  | 29.47 | 8.87E-01 |
| cg15457390 | 9.59   | 4.67  | 4.00E-02 | 7.65   | 6.51  | 2.40E-01 | 16.49   | 12.09  | 1.73E-01 | 16.88  | 11.14 | 1.30E-01 | 1.41   | 11.66 | 9.04E-01 |
| cg07033286 | -14.58 | 7.10  | 4.00E-02 | -8.56  | 15.58 | 5.82E-01 | -26.73  | 30.44  | 3.80E-01 | -11.14 | 8.90  | 2.10E-01 | -42.28 | 22.40 | 5.91E-02 |
| cg22615255 | 17.68  | 8.61  | 4.00E-02 | 19.24  | 16.05 | 2.30E-01 | -27.51  | 29.65  | 3.53E-01 | 20.78  | 12.12 | 8.65E-02 | 32.29  | 24.54 | 1.88E-01 |
| cg03475190 | 10.38  | 5.05  | 4.00E-02 | 7.18   | 6.68  | 2.82E-01 | 14.13   | 11.68  | 2.26E-01 | 20.80  | 23.34 | 3.73E-01 | 13.66  | 11.48 | 2.34E-01 |
| cg05368971 | 9.74   | 4.74  | 4.00E-02 | 9.73   | 6.14  | 1.13E-01 | 17.98   | 12.33  | 1.45E-01 | 18.87  | 15.62 | 2.27E-01 | -2.83  | 11.73 | 8.10E-01 |
| cg01655831 | 19.05  | 9.28  | 4.00E-02 | 22.85  | 15.27 | 1.35E-01 | 30.74   | 25.42  | 2.27E-01 | 14.35  | 18.45 | 4.37E-01 | 11.83  | 18.75 | 5.28E-01 |
| cg21766191 | -14.29 | 6.96  | 4.00E-02 | -18.76 | 16.58 | 2.58E-01 | -13.44  | 21.22  | 5.27E-01 | -13.94 | 8.75  | 1.11E-01 | -8.54  | 24.07 | 7.23E-01 |
| cg13140770 | 22.11  | 10.77 | 4.00E-02 | 27.69  | 16.11 | 8.55E-02 | 17.88   | 28.18  | 5.26E-01 | 17.42  | 41.65 | 6.76E-01 | 17.51  | 18.45 | 3.43E-01 |
| cg02070354 | 15.19  | 7.40  | 4.00E-02 | -2.57  | 29.62 | 9.31E-01 | 52.76   | 112.47 | 6.39E-01 | 18.08  | 7.81  | 2.06E-02 | -31.00 | 39.13 | 4.28E-01 |
| cg08384322 | -7.89  | 3.84  | 4.00E-02 | -7.96  | 9.72  | 4.13E-01 | -1.64   | 14.08  | 9.07E-01 | -7.77  | 4.80  | 1.05E-01 | -12.07 | 10.78 | 2.63E-01 |
| cg25789679 | -32.29 | 15.72 | 4.00E-02 | -40.06 | 47.39 | 3.98E-01 | 50.96   | 189.56 | 7.88E-01 | -27.83 | 17.56 | 1.13E-01 | -72.78 | 55.19 | 1.87E-01 |
| cg08761643 | 22.63  | 11.02 | 4.01E-02 | 16.18  | 19.67 | 4.11E-01 | 15.00   | 47.39  | 7.52E-01 | 22.81  | 15.45 | 1.40E-01 | 41.74  | 31.44 | 1.84E-01 |
| cg13782615 | 14.44  | 7.03  | 4.01E-02 | 12.31  | 8.76  | 1.60E-01 | 63.86   | 32.31  | 4.81E-02 | 13.08  | 28.64 | 6.48E-01 | 10.86  | 14.11 | 4.41E-01 |
| cg21417229 | 34.77  | 16.94 | 4.01E-02 | 36.32  | 47.66 | 4.46E-01 | 68.10   | 183.11 | 7.10E-01 | 38.25  | 19.07 | 4.49E-02 | -7.46  | 61.35 | 9.03E-01 |
| cg15844438 | 9.39   | 4.57  | 4.01E-02 | 14.15  | 8.54  | 9.73E-02 | 17.31   | 12.57  | 1.69E-01 | 8.85   | 6.42  | 1.68E-01 | -13.43 | 14.97 | 3.70E-01 |

|            |        |       |          |        |       |          |         |        |          |         |       |          |        |       |          |
|------------|--------|-------|----------|--------|-------|----------|---------|--------|----------|---------|-------|----------|--------|-------|----------|
| cg10125882 | -13.74 | 6.69  | 4.01E-02 | -15.19 | 10.87 | 1.62E-01 | -12.41  | 14.56  | 3.94E-01 | -3.89   | 16.80 | 8.17E-01 | -18.94 | 13.38 | 1.57E-01 |
| cg09029293 | 21.95  | 10.69 | 4.01E-02 | 15.93  | 19.72 | 4.19E-01 | 29.34   | 20.09  | 1.44E-01 | 11.34   | 20.07 | 5.72E-01 | 41.26  | 28.67 | 1.50E-01 |
| cg22959063 | 14.41  | 7.02  | 4.01E-02 | 7.96   | 14.02 | 5.70E-01 | 110.36  | 67.44  | 1.02E-01 | 12.88   | 8.81  | 1.44E-01 | 29.31  | 21.79 | 1.79E-01 |
| cg17401106 | -13.55 | 6.60  | 4.01E-02 | -24.48 | 10.02 | 1.46E-02 | -11.63  | 14.87  | 4.34E-01 | 4.51    | 19.67 | 8.19E-01 | -4.47  | 13.02 | 7.31E-01 |
| cg13561921 | -33.03 | 16.09 | 4.01E-02 | -31.82 | 18.73 | 8.93E-02 | 22.08   | 74.41  | 7.67E-01 | -0.67   | 73.39 | 9.93E-01 | -63.02 | 39.32 | 1.09E-01 |
| cg13755546 | 21.23  | 10.34 | 4.01E-02 | 17.57  | 21.71 | 4.18E-01 | -174.13 | 126.26 | 1.68E-01 | 24.18   | 12.32 | 4.97E-02 | 22.20  | 41.52 | 5.93E-01 |
| cg11468819 | 8.82   | 4.30  | 4.01E-02 | 4.78   | 6.02  | 4.27E-01 | 19.13   | 9.72   | 4.90E-02 | 19.46   | 10.57 | 6.56E-02 | 1.72   | 7.96  | 8.29E-01 |
| cg20188621 | -7.77  | 3.78  | 4.01E-02 | -5.19  | 6.29  | 4.09E-01 | -12.92  | 10.83  | 2.33E-01 | -12.26  | 6.11  | 4.50E-02 | 2.82   | 10.35 | 7.85E-01 |
| cg14271908 | 37.47  | 18.25 | 4.01E-02 | 36.59  | 23.10 | 1.13E-01 | 143.09  | 81.65  | 7.97E-02 | 63.99   | 77.12 | 4.07E-01 | 14.44  | 35.13 | 6.81E-01 |
| cg03385272 | 24.58  | 11.97 | 4.01E-02 | 28.16  | 22.44 | 2.09E-01 | 25.56   | 49.21  | 6.03E-01 | 13.26   | 17.49 | 4.48E-01 | 47.21  | 27.69 | 8.82E-02 |
| cg08182160 | -12.47 | 6.07  | 4.01E-02 | -10.91 | 8.73  | 2.12E-01 | -15.91  | 15.64  | 3.09E-01 | -4.76   | 19.52 | 8.07E-01 | -16.11 | 11.71 | 1.69E-01 |
| cg10953131 | 25.57  | 12.46 | 4.01E-02 | 35.06  | 17.94 | 5.06E-02 | 36.22   | 25.24  | 1.51E-01 | -13.50  | 38.49 | 7.26E-01 | 7.41   | 30.26 | 8.06E-01 |
| cg14955531 | -12.31 | 6.00  | 4.01E-02 | -9.99  | 17.89 | 5.77E-01 | -31.36  | 25.04  | 2.11E-01 | -10.81  | 6.85  | 1.14E-01 | -17.14 | 23.58 | 4.67E-01 |
| cg02582191 | -8.18  | 3.98  | 4.01E-02 | -5.92  | 5.81  | 3.08E-01 | -16.76  | 9.66   | 8.27E-02 | -7.46   | 10.35 | 4.71E-01 | -6.80  | 8.68  | 4.33E-01 |
| cg15393179 | -12.76 | 6.21  | 4.01E-02 | -30.23 | 15.18 | 4.64E-02 | 1.08    | 19.04  | 9.55E-01 | -11.24  | 7.91  | 1.56E-01 | -8.01  | 18.78 | 6.70E-01 |
| cg24657523 | -8.51  | 4.14  | 4.01E-02 | -9.90  | 6.32  | 1.18E-01 | -17.72  | 10.23  | 8.33E-02 | 7.28    | 11.41 | 5.24E-01 | -8.41  | 7.91  | 2.88E-01 |
| cg05433152 | -10.34 | 5.04  | 4.01E-02 | -24.98 | 12.17 | 4.00E-02 | -9.24   | 18.74  | 6.22E-01 | -4.84   | 5.08  | 3.41E-01 | -22.90 | 14.67 | 1.19E-01 |
| cg01715499 | 19.70  | 9.60  | 4.01E-02 | 5.89   | 17.76 | 7.40E-01 | 12.12   | 33.63  | 7.18E-01 | 20.53   | 13.50 | 1.28E-01 | 54.81  | 27.64 | 4.74E-02 |
| cg23516026 | -18.14 | 8.84  | 4.01E-02 | -24.45 | 15.34 | 1.11E-01 | 0.62    | 31.61  | 9.84E-01 | -11.00  | 13.07 | 4.00E-01 | -37.89 | 24.20 | 1.17E-01 |
| cg08176694 | 7.36   | 3.58  | 4.01E-02 | 4.94   | 4.54  | 2.77E-01 | 19.50   | 9.18   | 3.36E-02 | 7.25    | 10.71 | 4.99E-01 | 4.39   | 10.68 | 6.81E-01 |
| cg05754719 | 8.57   | 4.18  | 4.01E-02 | 8.97   | 5.40  | 9.68E-02 | 18.74   | 6.81   | 5.92E-03 | -3.95   | 8.47  | 6.41E-01 | 6.89   | 7.27  | 3.43E-01 |
| cg25792581 | -13.83 | 6.74  | 4.01E-02 | -19.60 | 11.82 | 9.72E-02 | 3.29    | 16.48  | 8.42E-01 | -8.88   | 5.93  | 1.35E-01 | -39.38 | 16.63 | 1.79E-02 |
| cg13798146 | 20.29  | 9.88  | 4.01E-02 | 48.52  | 36.20 | 1.80E-01 | -24.86  | 86.48  | 7.74E-01 | 21.28   | 10.92 | 5.14E-02 | -4.72  | 32.43 | 8.84E-01 |
| cg13705830 | 6.89   | 3.36  | 4.01E-02 | 8.46   | 5.33  | 1.12E-01 | 5.12    | 7.91   | 5.17E-01 | 7.70    | 6.84  | 2.60E-01 | 4.13   | 7.91  | 6.01E-01 |
| cg22163406 | 9.17   | 4.47  | 4.01E-02 | 13.53  | 10.79 | 2.10E-01 | 9.78    | 13.09  | 4.55E-01 | 6.40    | 5.65  | 2.57E-01 | 19.65  | 15.14 | 1.94E-01 |
| cg16111231 | -9.22  | 4.49  | 4.01E-02 | -10.99 | 5.88  | 6.18E-02 | -16.44  | 11.10  | 1.39E-01 | 8.05    | 13.92 | 5.63E-01 | -6.44  | 11.66 | 5.81E-01 |
| cg15526708 | 11.91  | 5.80  | 4.01E-02 | 20.28  | 7.74  | 8.81E-03 | 18.24   | 14.75  | 2.16E-01 | 3.47    | 14.06 | 8.05E-01 | -2.39  | 11.29 | 8.32E-01 |
| cg11730020 | -15.77 | 7.68  | 4.01E-02 | 2.58   | 20.23 | 8.99E-01 | -16.09  | 31.37  | 6.08E-01 | -19.81  | 9.06  | 2.88E-02 | -12.12 | 27.69 | 6.62E-01 |
| cg05099145 | -39.89 | 19.44 | 4.01E-02 | -25.26 | 24.19 | 2.96E-01 | 23.83   | 79.30  | 7.64E-01 | -109.65 | 56.88 | 5.39E-02 | -68.89 | 46.18 | 1.36E-01 |
| cg04990977 | -11.85 | 5.77  | 4.01E-02 | -2.07  | 10.29 | 8.41E-01 | -12.94  | 15.91  | 4.16E-01 | -21.00  | 8.78  | 1.67E-02 | -3.37  | 16.60 | 8.39E-01 |
| cg21442881 | 7.80   | 3.80  | 4.01E-02 | 9.40   | 5.12  | 6.60E-02 | 17.58   | 9.79   | 7.27E-02 | -1.72   | 9.58  | 8.58E-01 | 1.67   | 10.14 | 8.69E-01 |
| cg12970008 | 24.00  | 11.70 | 4.01E-02 | 44.28  | 17.53 | 1.15E-02 | 10.74   | 43.03  | 8.03E-01 | 5.23    | 23.66 | 8.25E-01 | 9.38   | 24.04 | 6.97E-01 |
| cg16638248 | -9.65  | 4.70  | 4.01E-02 | -13.99 | 6.83  | 4.05E-02 | -3.78   | 10.82  | 7.27E-01 | -1.28   | 13.92 | 9.27E-01 | -9.68  | 9.96  | 3.31E-01 |
| cg21236177 | 21.06  | 10.26 | 4.01E-02 | 23.07  | 20.60 | 2.63E-01 | 28.51   | 24.30  | 2.41E-01 | 16.50   | 15.10 | 2.74E-01 | 23.60  | 30.77 | 4.43E-01 |
| cg10928466 | 9.70   | 4.73  | 4.01E-02 | 6.28   | 7.35  | 3.93E-01 | 18.78   | 9.37   | 4.51E-02 | -5.88   | 13.88 | 6.72E-01 | 13.94  | 10.17 | 1.71E-01 |

|            |        |       |          |        |       |          |        |        |          |        |       |          |         |       |          |
|------------|--------|-------|----------|--------|-------|----------|--------|--------|----------|--------|-------|----------|---------|-------|----------|
| cg26100986 | -35.58 | 17.34 | 4.01E-02 | -49.86 | 22.67 | 2.78E-02 | -72.89 | 85.07  | 3.92E-01 | -14.48 | 62.69 | 8.17E-01 | -7.67   | 31.80 | 8.09E-01 |
| cg10431512 | 19.15  | 9.33  | 4.01E-02 | 28.66  | 17.05 | 9.27E-02 | 11.68  | 18.33  | 5.24E-01 | 7.94   | 16.60 | 6.32E-01 | 40.03   | 26.33 | 1.28E-01 |
| cg19554569 | -7.27  | 3.54  | 4.02E-02 | -13.00 | 9.14  | 1.55E-01 | 3.25   | 14.56  | 8.24E-01 | -5.93  | 4.28  | 1.66E-01 | -13.83  | 10.95 | 2.07E-01 |
| cg20376953 | -5.34  | 2.60  | 4.02E-02 | -8.70  | 4.39  | 4.75E-02 | 2.23   | 6.18   | 7.18E-01 | -4.75  | 4.49  | 2.90E-01 | -8.01   | 7.08  | 2.58E-01 |
| cg00481884 | -18.00 | 8.77  | 4.02E-02 | -7.74  | 13.35 | 5.62E-01 | -35.98 | 18.59  | 5.29E-02 | -21.00 | 26.24 | 4.24E-01 | -18.40  | 18.15 | 3.11E-01 |
| cg16556078 | -15.81 | 7.70  | 4.02E-02 | -18.13 | 14.46 | 2.10E-01 | -14.46 | 14.99  | 3.35E-01 | -12.28 | 14.08 | 3.83E-01 | -20.74  | 19.72 | 2.93E-01 |
| cg03582215 | -16.17 | 7.88  | 4.02E-02 | -6.74  | 13.26 | 6.11E-01 | -6.71  | 25.39  | 7.92E-01 | -26.18 | 12.18 | 3.16E-02 | -16.56  | 21.66 | 4.45E-01 |
| cg00273037 | -12.13 | 5.91  | 4.02E-02 | -18.84 | 18.41 | 3.06E-01 | 13.57  | 33.87  | 6.89E-01 | -11.95 | 6.54  | 6.77E-02 | -16.86  | 26.41 | 5.23E-01 |
| cg05506448 | 27.05  | 13.18 | 4.02E-02 | 0.20   | 25.01 | 9.94E-01 | 43.99  | 67.71  | 5.16E-01 | 31.26  | 17.72 | 7.77E-02 | 61.51   | 36.51 | 9.20E-02 |
| cg12808347 | 10.88  | 5.30  | 4.02E-02 | 7.74   | 7.94  | 3.30E-01 | 7.68   | 12.43  | 5.37E-01 | 24.58  | 14.76 | 9.59E-02 | 11.76   | 10.75 | 2.74E-01 |
| cg24876035 | 6.12   | 2.98  | 4.02E-02 | 3.80   | 3.35  | 2.56E-01 | 14.86  | 5.54   | 7.35E-03 | 2.71   | 10.51 | 7.96E-01 | 1.35    | 7.80  | 8.62E-01 |
| cg18174542 | -8.77  | 4.27  | 4.02E-02 | -12.87 | 5.91  | 2.95E-02 | -0.29  | 10.39  | 9.78E-01 | -4.96  | 14.31 | 7.29E-01 | -7.09   | 9.12  | 4.37E-01 |
| cg16668520 | -9.48  | 4.62  | 4.02E-02 | -18.09 | 10.59 | 8.76E-02 | -16.03 | 17.44  | 3.58E-01 | -8.95  | 5.82  | 1.24E-01 | 6.81    | 14.05 | 6.28E-01 |
| cg11511669 | 14.64  | 7.14  | 4.02E-02 | 26.31  | 13.57 | 5.25E-02 | 14.15  | 18.77  | 4.51E-01 | 7.71   | 11.12 | 4.88E-01 | 12.81   | 17.44 | 4.63E-01 |
| cg16537285 | 13.50  | 6.58  | 4.02E-02 | 14.65  | 10.91 | 1.80E-01 | 15.94  | 10.70  | 1.36E-01 | 10.17  | 19.17 | 5.96E-01 | 6.78    | 17.55 | 6.99E-01 |
| cg15715965 | -17.22 | 8.39  | 4.02E-02 | -11.76 | 18.16 | 5.17E-01 | -31.31 | 21.17  | 1.39E-01 | -8.33  | 10.43 | 4.24E-01 | -52.32  | 25.10 | 3.71E-02 |
| cg17973385 | -16.82 | 8.20  | 4.02E-02 | -23.56 | 20.64 | 2.54E-01 | -13.91 | 33.60  | 6.79E-01 | -18.10 | 9.70  | 6.21E-02 | 9.14    | 31.07 | 7.69E-01 |
| cg01187920 | 10.66  | 5.20  | 4.02E-02 | 8.46   | 8.47  | 3.18E-01 | 27.50  | 14.61  | 5.98E-02 | 4.99   | 11.63 | 6.68E-01 | 10.08   | 9.51  | 2.89E-01 |
| cg09814448 | -6.82  | 3.32  | 4.02E-02 | -9.02  | 7.09  | 2.03E-01 | -4.18  | 11.22  | 7.09E-01 | -7.79  | 4.42  | 7.78E-02 | -0.44   | 9.39  | 9.63E-01 |
| cg15356966 | 6.67   | 3.25  | 4.02E-02 | 6.09   | 4.24  | 1.51E-01 | 9.10   | 7.43   | 2.21E-01 | 1.36   | 11.89 | 9.09E-01 | 8.47    | 8.45  | 3.16E-01 |
| cg06508867 | -10.00 | 4.88  | 4.02E-02 | -4.20  | 6.90  | 5.43E-01 | -9.99  | 13.51  | 4.60E-01 | -22.34 | 13.38 | 9.50E-02 | -15.30  | 10.00 | 1.26E-01 |
| cg16450590 | 13.16  | 6.41  | 4.02E-02 | 13.95  | 8.79  | 1.12E-01 | 25.24  | 16.37  | 1.23E-01 | -26.81 | 28.82 | 3.52E-01 | 12.04   | 12.47 | 3.34E-01 |
| cg06968912 | 9.19   | 4.48  | 4.02E-02 | 8.59   | 6.30  | 1.73E-01 | 10.38  | 11.88  | 3.82E-01 | 17.44  | 11.64 | 1.34E-01 | 3.89    | 9.91  | 6.95E-01 |
| cg08678314 | -8.46  | 4.12  | 4.02E-02 | -4.22  | 8.78  | 6.31E-01 | -3.98  | 14.27  | 7.81E-01 | -8.69  | 5.55  | 1.17E-01 | -16.63  | 10.86 | 1.26E-01 |
| cg00582765 | -17.71 | 8.63  | 4.02E-02 | -11.89 | 21.05 | 5.72E-01 | -40.24 | 41.94  | 3.37E-01 | -15.71 | 10.43 | 1.32E-01 | -30.89  | 26.60 | 2.46E-01 |
| cg12489793 | 15.53  | 7.57  | 4.02E-02 | 22.82  | 17.03 | 1.80E-01 | -16.20 | 41.75  | 6.98E-01 | 17.21  | 9.21  | 6.18E-02 | -0.58   | 24.55 | 9.81E-01 |
| cg07691133 | 51.23  | 24.97 | 4.02E-02 | 40.96  | 31.99 | 2.00E-01 | -20.90 | 129.17 | 8.71E-01 | 71.94  | 81.15 | 3.75E-01 | 78.31   | 49.12 | 1.11E-01 |
| cg26701826 | 6.26   | 3.05  | 4.02E-02 | 5.53   | 3.99  | 1.66E-01 | 13.80  | 9.10   | 1.29E-01 | 9.99   | 7.99  | 2.11E-01 | 0.15    | 7.65  | 9.84E-01 |
| cg19081101 | 4.77   | 2.33  | 4.02E-02 | 3.18   | 3.14  | 3.12E-01 | 8.02   | 4.46   | 7.22E-02 | 0.50   | 10.46 | 9.62E-01 | 6.30    | 6.43  | 3.27E-01 |
| cg03359095 | -5.86  | 2.86  | 4.02E-02 | -7.69  | 4.18  | 6.61E-02 | -9.90  | 6.27   | 1.14E-01 | -2.08  | 7.72  | 7.88E-01 | 0.35    | 6.58  | 9.57E-01 |
| cg27018309 | 16.43  | 8.01  | 4.02E-02 | 16.59  | 15.34 | 2.79E-01 | 34.62  | 23.45  | 1.40E-01 | 15.44  | 11.07 | 1.63E-01 | -2.48   | 27.11 | 9.27E-01 |
| cg09359391 | 8.21   | 4.00  | 4.02E-02 | 5.65   | 5.83  | 3.32E-01 | 5.59   | 10.64  | 5.99E-01 | 10.03  | 10.02 | 3.17E-01 | 13.89   | 8.40  | 9.85E-02 |
| cg06562283 | -10.06 | 4.90  | 4.02E-02 | -8.33  | 7.43  | 2.62E-01 | -9.05  | 11.27  | 4.22E-01 | -8.34  | 11.53 | 4.70E-01 | -16.47  | 11.10 | 1.38E-01 |
| cg12955434 | -49.30 | 24.03 | 4.02E-02 | -34.74 | 29.35 | 2.37E-01 | 92.19  | 136.23 | 4.99E-01 | -66.45 | 91.45 | 4.67E-01 | -105.85 | 50.17 | 3.49E-02 |
| cg04136290 | 24.61  | 12.00 | 4.02E-02 | 19.73  | 39.89 | 6.21E-01 | -16.53 | 190.50 | 9.31E-01 | 29.76  | 13.02 | 2.22E-02 | -42.76  | 50.72 | 3.99E-01 |

|            |        |       |          |        |       |          |         |        |          |        |       |          |        |       |          |
|------------|--------|-------|----------|--------|-------|----------|---------|--------|----------|--------|-------|----------|--------|-------|----------|
| cg11659663 | 9.86   | 4.81  | 4.02E-02 | 11.18  | 6.87  | 1.04E-01 | 12.93   | 9.79   | 1.87E-01 | 4.40   | 17.08 | 7.97E-01 | 4.86   | 11.03 | 6.60E-01 |
| cg06043886 | 19.37  | 9.44  | 4.02E-02 | 8.30   | 16.66 | 6.18E-01 | 14.91   | 17.38  | 3.91E-01 | 23.67  | 19.37 | 2.22E-01 | 45.68  | 24.69 | 6.43E-02 |
| cg16983801 | 10.43  | 5.09  | 4.02E-02 | 19.15  | 8.99  | 3.32E-02 | 3.28    | 14.29  | 8.19E-01 | 4.88   | 7.48  | 5.14E-01 | 18.11  | 16.93 | 2.85E-01 |
| cg00605777 | 9.55   | 4.66  | 4.02E-02 | 11.68  | 6.67  | 7.98E-02 | 14.35   | 11.44  | 2.10E-01 | 7.44   | 10.86 | 4.93E-01 | 0.69   | 11.52 | 9.52E-01 |
| cg23807559 | 19.98  | 9.74  | 4.02E-02 | 8.84   | 20.46 | 6.66E-01 | -23.67  | 50.53  | 6.39E-01 | 22.40  | 12.31 | 6.88E-02 | 43.88  | 29.36 | 1.35E-01 |
| cg04529938 | 7.92   | 3.86  | 4.02E-02 | 9.26   | 5.13  | 7.09E-02 | 12.66   | 10.38  | 2.23E-01 | 5.63   | 10.11 | 5.77E-01 | 0.61   | 10.07 | 9.52E-01 |
| cg03406011 | 17.76  | 8.66  | 4.03E-02 | 36.76  | 14.87 | 1.35E-02 | 2.39    | 15.11  | 8.75E-01 | 19.80  | 20.85 | 3.42E-01 | 6.88   | 21.61 | 7.50E-01 |
| cg26880493 | 18.56  | 9.05  | 4.03E-02 | 15.95  | 24.08 | 5.08E-01 | 15.20   | 68.17  | 8.24E-01 | 24.60  | 10.46 | 1.87E-02 | -25.09 | 29.57 | 3.96E-01 |
| cg03389538 | 6.41   | 3.13  | 4.03E-02 | 5.74   | 3.89  | 1.40E-01 | 15.64   | 8.10   | 5.35E-02 | 4.38   | 9.68  | 6.51E-01 | -0.75  | 9.79  | 9.39E-01 |
| cg10997860 | -9.57  | 4.67  | 4.03E-02 | -8.40  | 10.54 | 4.25E-01 | -4.83   | 17.67  | 7.85E-01 | -8.82  | 5.83  | 1.31E-01 | -20.61 | 15.19 | 1.75E-01 |
| cg07571509 | 12.27  | 5.98  | 4.03E-02 | 0.40   | 16.09 | 9.80E-01 | 35.95   | 34.93  | 3.03E-01 | 14.04  | 7.01  | 4.53E-02 | 9.01   | 18.46 | 6.25E-01 |
| cg03142586 | 9.61   | 4.68  | 4.03E-02 | 7.56   | 14.12 | 5.92E-01 | 41.85   | 57.64  | 4.68E-01 | 9.36   | 5.34  | 7.95E-02 | 11.42  | 13.94 | 4.13E-01 |
| cg15089892 | -13.44 | 6.55  | 4.03E-02 | -38.85 | 21.48 | 7.06E-02 | 57.43   | 66.52  | 3.88E-01 | -10.73 | 7.26  | 1.39E-01 | -19.90 | 22.88 | 3.84E-01 |
| cg13718960 | 14.54  | 7.09  | 4.03E-02 | 18.58  | 16.36 | 2.56E-01 | 19.35   | 21.93  | 3.77E-01 | 15.58  | 9.40  | 9.75E-02 | 1.19   | 19.04 | 9.50E-01 |
| cg22049858 | -28.79 | 14.04 | 4.03E-02 | -9.29  | 39.68 | 8.15E-01 | -238.17 | 174.64 | 1.73E-01 | -30.73 | 15.69 | 5.02E-02 | -21.99 | 53.70 | 6.82E-01 |
| cg02122610 | 9.30   | 4.54  | 4.03E-02 | 2.93   | 11.13 | 7.92E-01 | 5.63    | 20.03  | 7.79E-01 | 10.33  | 5.43  | 5.70E-02 | 15.61  | 15.66 | 3.19E-01 |
| cg05423018 | 8.06   | 3.93  | 4.03E-02 | 6.56   | 5.51  | 2.34E-01 | 18.05   | 8.40   | 3.16E-02 | 9.06   | 12.65 | 4.74E-01 | -0.55  | 9.35  | 9.53E-01 |
| cg09472630 | -12.68 | 6.18  | 4.03E-02 | -16.26 | 10.55 | 1.23E-01 | -4.73   | 22.83  | 8.36E-01 | -14.07 | 8.56  | 1.00E-01 | 9.71   | 24.97 | 6.97E-01 |
| cg23803120 | -13.40 | 6.53  | 4.03E-02 | -14.08 | 15.66 | 3.69E-01 | 2.79    | 21.27  | 8.96E-01 | -15.96 | 8.12  | 4.94E-02 | -10.43 | 22.45 | 6.42E-01 |
| cg26733301 | 34.54  | 16.85 | 4.03E-02 | 77.87  | 27.53 | 4.67E-03 | -46.40  | 101.64 | 6.48E-01 | 22.45  | 15.23 | 1.40E-01 | 16.26  | 37.83 | 6.67E-01 |
| cg21054248 | 14.54  | 7.09  | 4.03E-02 | 10.65  | 19.20 | 5.79E-01 | -45.33  | 55.30  | 4.12E-01 | 16.61  | 8.06  | 3.92E-02 | 13.33  | 26.46 | 6.14E-01 |
| cg14127859 | 14.67  | 7.15  | 4.03E-02 | 28.33  | 11.92 | 1.75E-02 | 0.09    | 17.66  | 9.96E-01 | 8.75   | 14.22 | 5.38E-01 | 10.03  | 15.15 | 5.08E-01 |
| cg15947940 | 35.01  | 17.07 | 4.03E-02 | 53.71  | 55.00 | 3.29E-01 | -109.02 | 245.99 | 6.58E-01 | 39.75  | 18.92 | 3.56E-02 | -23.91 | 58.83 | 6.84E-01 |
| cg25057584 | 10.38  | 5.06  | 4.03E-02 | 6.84   | 7.79  | 3.80E-01 | 15.99   | 10.32  | 1.21E-01 | 5.00   | 13.29 | 7.07E-01 | 15.17  | 11.52 | 1.88E-01 |
| cg02039271 | 17.56  | 8.56  | 4.03E-02 | 23.39  | 19.21 | 2.23E-01 | -33.71  | 37.82  | 3.73E-01 | 17.37  | 10.91 | 1.11E-01 | 29.37  | 23.38 | 2.09E-01 |
| cg18999535 | -10.21 | 4.98  | 4.03E-02 | -0.83  | 14.55 | 9.55E-01 | -5.12   | 21.53  | 8.12E-01 | -12.27 | 5.69  | 3.10E-02 | -6.94  | 19.68 | 7.25E-01 |
| cg21846009 | -12.97 | 6.33  | 4.03E-02 | -18.82 | 8.83  | 3.31E-02 | -11.54  | 16.04  | 4.72E-01 | -16.06 | 20.86 | 4.41E-01 | -0.18  | 12.93 | 9.89E-01 |
| cg14090995 | -10.47 | 5.10  | 4.03E-02 | -9.35  | 9.75  | 3.38E-01 | -4.51   | 12.16  | 7.11E-01 | -10.76 | 7.87  | 1.72E-01 | -19.98 | 14.19 | 1.59E-01 |
| cg14929148 | 33.10  | 16.14 | 4.03E-02 | 43.24  | 49.70 | 3.84E-01 | 145.99  | 204.08 | 4.74E-01 | 38.21  | 17.89 | 3.27E-02 | -47.40 | 59.47 | 4.25E-01 |
| cg16537756 | 15.79  | 7.70  | 4.03E-02 | 21.83  | 33.95 | 5.20E-01 | -154.23 | 154.31 | 3.18E-01 | 14.93  | 8.18  | 6.80E-02 | 30.45  | 31.48 | 3.33E-01 |
| cg02467451 | -9.22  | 4.50  | 4.03E-02 | -8.97  | 6.60  | 1.74E-01 | 4.14    | 11.04  | 7.08E-01 | -18.50 | 12.29 | 1.32E-01 | -13.84 | 9.26  | 1.35E-01 |
| cg06506007 | -5.82  | 2.84  | 4.03E-02 | -6.49  | 4.16  | 1.19E-01 | -8.15   | 6.12   | 1.83E-01 | -13.69 | 8.62  | 1.12E-01 | 2.08   | 6.17  | 7.36E-01 |
| cg21157873 | 17.58  | 8.58  | 4.03E-02 | 8.22   | 22.96 | 7.20E-01 | 35.07   | 28.98  | 2.26E-01 | 18.81  | 10.25 | 6.65E-02 | 2.78   | 31.65 | 9.30E-01 |
| cg10241701 | -29.19 | 14.24 | 4.03E-02 | -50.65 | 26.21 | 5.33E-02 | 5.14    | 98.61  | 9.58E-01 | -18.22 | 18.80 | 3.33E-01 | -35.32 | 42.82 | 4.09E-01 |
| cg08914740 | -9.08  | 4.43  | 4.03E-02 | -1.06  | 12.56 | 9.33E-01 | -19.68  | 23.56  | 4.04E-01 | -10.16 | 5.09  | 4.61E-02 | -6.78  | 15.22 | 6.56E-01 |

|            |        |       |          |        |       |          |         |        |          |        |       |          |        |       |          |
|------------|--------|-------|----------|--------|-------|----------|---------|--------|----------|--------|-------|----------|--------|-------|----------|
| cg04010165 | 27.08  | 13.21 | 4.03E-02 | -3.53  | 32.34 | 9.13E-01 | 28.51   | 78.01  | 7.15E-01 | 33.27  | 15.54 | 3.23E-02 | 34.22  | 45.91 | 4.56E-01 |
| cg16384588 | 18.81  | 9.17  | 4.03E-02 | 23.62  | 11.58 | 4.14E-02 | -7.06   | 27.49  | 7.97E-01 | 30.14  | 34.13 | 3.77E-01 | 13.75  | 21.12 | 5.15E-01 |
| cg23395341 | -10.81 | 5.27  | 4.03E-02 | -22.09 | 13.07 | 9.09E-02 | 2.59    | 24.58  | 9.16E-01 | -7.77  | 6.44  | 2.28E-01 | -17.47 | 15.10 | 2.47E-01 |
| cg01098886 | 26.64  | 12.99 | 4.03E-02 | 57.26  | 21.38 | 7.39E-03 | 17.13   | 22.80  | 4.52E-01 | 6.04   | 13.96 | 6.65E-01 | 45.02  | 30.19 | 1.36E-01 |
| cg04423976 | 23.87  | 11.64 | 4.03E-02 | 30.12  | 15.45 | 5.12E-02 | 28.91   | 39.92  | 4.69E-01 | 23.63  | 36.91 | 5.22E-01 | 7.89   | 23.40 | 7.36E-01 |
| cg22143209 | -32.39 | 15.80 | 4.03E-02 | -36.26 | 21.64 | 9.39E-02 | 90.88   | 84.09  | 2.80E-01 | -16.03 | 45.20 | 7.23E-01 | -46.24 | 28.39 | 1.03E-01 |
| cg07021447 | 17.55  | 8.56  | 4.03E-02 | 14.75  | 16.73 | 3.78E-01 | 48.95   | 19.14  | 1.05E-02 | 9.15   | 10.37 | 3.78E-01 | 9.28   | 25.11 | 7.12E-01 |
| cg09724374 | 8.47   | 4.13  | 4.03E-02 | 0.62   | 5.75  | 9.14E-01 | 15.43   | 7.30   | 3.45E-02 | 4.64   | 6.47  | 4.73E-01 | 17.72  | 7.90  | 2.48E-02 |
| cg14832378 | -4.52  | 2.20  | 4.03E-02 | -2.53  | 3.10  | 4.15E-01 | -8.71   | 4.15   | 3.58E-02 | -4.27  | 7.81  | 5.84E-01 | -3.32  | 6.06  | 5.84E-01 |
| cg16310097 | -14.07 | 6.86  | 4.04E-02 | -17.82 | 11.81 | 1.31E-01 | -1.40   | 14.38  | 9.22E-01 | -24.14 | 8.48  | 4.42E-03 | 8.76   | 18.48 | 6.35E-01 |
| cg04112866 | 6.38   | 3.11  | 4.04E-02 | 6.70   | 4.15  | 1.07E-01 | 14.07   | 8.87   | 1.13E-01 | 6.32   | 7.84  | 4.20E-01 | -0.78  | 7.90  | 9.21E-01 |
| cg20978600 | 30.07  | 14.67 | 4.04E-02 | 14.30  | 18.83 | 4.48E-01 | 60.75   | 40.76  | 1.36E-01 | 37.08  | 44.64 | 4.06E-01 | 61.15  | 37.17 | 1.00E-01 |
| cg13663303 | -7.42  | 3.62  | 4.04E-02 | -14.78 | 8.94  | 9.81E-02 | -0.01   | 11.62  | 9.99E-01 | -5.38  | 4.59  | 2.41E-01 | -14.19 | 10.64 | 1.82E-01 |
| cg19156402 | 14.11  | 6.88  | 4.04E-02 | 23.00  | 17.89 | 1.98E-01 | -38.89  | 58.27  | 5.05E-01 | 12.37  | 7.83  | 1.14E-01 | 25.84  | 26.91 | 3.37E-01 |
| cg10784110 | 11.22  | 5.47  | 4.04E-02 | 11.49  | 7.78  | 1.40E-01 | 11.10   | 11.17  | 3.20E-01 | 8.48   | 17.11 | 6.20E-01 | 12.27  | 13.55 | 3.65E-01 |
| cg10373676 | -37.64 | 18.36 | 4.04E-02 | -40.78 | 23.02 | 7.64E-02 | -91.04  | 80.95  | 2.61E-01 | -49.17 | 67.39 | 4.66E-01 | -14.10 | 37.65 | 7.08E-01 |
| cg14005531 | -9.88  | 4.82  | 4.04E-02 | -22.26 | 10.76 | 3.87E-02 | 1.83    | 21.31  | 9.32E-01 | -5.58  | 4.63  | 2.28E-01 | -25.01 | 16.15 | 1.21E-01 |
| cg12163845 | 19.55  | 9.54  | 4.04E-02 | 4.36   | 8.47  | 6.07E-01 | 46.98   | 12.26  | 1.26E-04 | 15.58  | 12.47 | 2.11E-01 | 14.82  | 13.54 | 2.74E-01 |
| cg10679076 | -30.53 | 14.89 | 4.04E-02 | -59.45 | 29.25 | 4.21E-02 | -107.68 | 92.06  | 2.42E-01 | -24.05 | 19.45 | 2.16E-01 | 14.10  | 41.65 | 7.35E-01 |
| cg07408552 | 14.94  | 7.29  | 4.04E-02 | 18.89  | 9.16  | 3.93E-02 | 29.98   | 31.02  | 3.34E-01 | 2.62   | 33.82 | 9.38E-01 | 4.58   | 14.15 | 7.46E-01 |
| cg25315312 | -12.11 | 5.91  | 4.04E-02 | -19.93 | 7.81  | 1.07E-02 | -0.87   | 17.67  | 9.61E-01 | -18.26 | 10.70 | 8.79E-02 | 3.21   | 11.19 | 7.74E-01 |
| cg14116162 | 16.97  | 8.28  | 4.04E-02 | 33.24  | 18.45 | 7.16E-02 | 12.08   | 46.17  | 7.94E-01 | 13.51  | 10.22 | 1.86E-01 | 9.28   | 25.01 | 7.11E-01 |
| cg13797775 | 41.74  | 20.36 | 4.04E-02 | 42.79  | 55.15 | 4.38E-01 | 83.75   | 225.68 | 7.11E-01 | 51.20  | 23.15 | 2.70E-02 | -53.73 | 71.21 | 4.51E-01 |
| cg02840025 | 11.50  | 5.61  | 4.04E-02 | 7.15   | 6.30  | 2.56E-01 | 19.04   | 11.48  | 9.73E-02 | 35.80  | 14.75 | 1.52E-02 | 3.54   | 7.05  | 6.15E-01 |
| cg18669654 | 23.13  | 11.28 | 4.04E-02 | 27.20  | 19.28 | 1.58E-01 | 0.84    | 32.06  | 9.79E-01 | 23.38  | 28.09 | 4.05E-01 | 26.68  | 18.49 | 1.49E-01 |
| cg24674302 | -15.23 | 7.43  | 4.04E-02 | -1.61  | 20.34 | 9.37E-01 | -13.66  | 41.20  | 7.40E-01 | -18.06 | 8.47  | 3.29E-02 | -10.34 | 29.52 | 7.26E-01 |
| cg10523820 | -19.56 | 9.54  | 4.04E-02 | -32.11 | 13.56 | 1.79E-02 | -2.27   | 23.97  | 9.25E-01 | 4.48   | 30.79 | 8.84E-01 | -14.91 | 19.06 | 4.34E-01 |
| cg15029475 | -11.36 | 5.54  | 4.04E-02 | -8.23  | 8.18  | 3.15E-01 | -11.85  | 13.20  | 3.69E-01 | -20.96 | 16.48 | 2.03E-01 | -12.40 | 11.04 | 2.61E-01 |
| cg14357669 | -34.44 | 16.80 | 4.04E-02 | -35.20 | 20.06 | 7.93E-02 | 23.11   | 99.24  | 8.16E-01 | -61.83 | 72.97 | 3.97E-01 | -32.87 | 36.07 | 3.62E-01 |
| cg06204745 | 26.50  | 12.93 | 4.04E-02 | 45.47  | 25.74 | 7.72E-02 | -43.91  | 48.34  | 3.64E-01 | 32.39  | 23.61 | 1.70E-01 | 22.45  | 21.07 | 2.87E-01 |
| cg06428196 | -12.08 | 5.89  | 4.04E-02 | -26.98 | 10.07 | 7.41E-03 | -1.50   | 16.52  | 9.28E-01 | -12.22 | 6.54  | 6.18E-02 | 2.32   | 12.35 | 8.51E-01 |
| cg27188447 | 29.95  | 14.61 | 4.04E-02 | 47.26  | 24.44 | 5.32E-02 | -76.81  | 82.54  | 3.52E-01 | 18.53  | 18.91 | 3.27E-01 | 64.19  | 44.37 | 1.48E-01 |
| cg10883284 | -20.97 | 10.23 | 4.04E-02 | -18.29 | 10.86 | 9.21E-02 | -45.10  | 69.30  | 5.15E-01 | -24.59 | 74.23 | 7.40E-01 | -45.53 | 38.06 | 2.31E-01 |
| cg08173959 | 22.79  | 11.12 | 4.04E-02 | 41.51  | 17.68 | 1.89E-02 | 25.53   | 18.21  | 1.61E-01 | -1.52  | 14.24 | 9.15E-01 | 40.27  | 25.44 | 1.14E-01 |
| cg00301159 | -7.90  | 3.85  | 4.04E-02 | -6.26  | 5.55  | 2.59E-01 | -3.42   | 9.80   | 7.27E-01 | -11.68 | 9.54  | 2.21E-01 | -12.24 | 8.63  | 1.56E-01 |



|            |        |       |          |        |       |          |         |        |          |        |       |          |        |       |          |
|------------|--------|-------|----------|--------|-------|----------|---------|--------|----------|--------|-------|----------|--------|-------|----------|
| cg17222829 | 6.23   | 3.04  | 4.04E-02 | 5.20   | 3.82  | 1.74E-01 | 9.35    | 7.60   | 2.19E-01 | 10.93  | 11.20 | 3.29E-01 | 4.81   | 8.34  | 5.65E-01 |
| cg27110277 | 7.96   | 3.89  | 4.04E-02 | 5.26   | 6.08  | 3.86E-01 | 14.12   | 9.08   | 1.20E-01 | 9.07   | 9.37  | 3.33E-01 | 7.06   | 7.99  | 3.77E-01 |
| cg17515702 | 14.33  | 6.99  | 4.04E-02 | 5.48   | 12.73 | 6.67E-01 | 5.47    | 39.24  | 8.89E-01 | 25.92  | 10.27 | 1.16E-02 | 2.38   | 15.54 | 8.78E-01 |
| cg10313337 | 5.06   | 2.47  | 4.04E-02 | 4.09   | 3.13  | 1.92E-01 | 13.63   | 6.50   | 3.59E-02 | 0.75   | 7.21  | 9.17E-01 | 3.95   | 7.17  | 5.81E-01 |
| cg26703507 | -7.38  | 3.60  | 4.04E-02 | -7.29  | 5.13  | 1.55E-01 | -9.22   | 7.30   | 2.06E-01 | -7.33  | 14.44 | 6.12E-01 | -5.37  | 8.01  | 5.03E-01 |
| cg10168149 | 13.37  | 6.52  | 4.04E-02 | 18.61  | 18.79 | 3.22E-01 | 30.56   | 27.47  | 2.66E-01 | 13.50  | 8.08  | 9.50E-02 | 3.57   | 15.72 | 8.20E-01 |
| cg00635382 | 46.88  | 22.87 | 4.04E-02 | 56.66  | 35.46 | 1.10E-01 | -11.37  | 173.81 | 9.48E-01 | 94.76  | 48.94 | 5.28E-02 | 8.04   | 38.77 | 8.36E-01 |
| cg09324706 | 19.38  | 9.46  | 4.04E-02 | 25.30  | 11.33 | 2.55E-02 | -2.05   | 42.34  | 9.61E-01 | -13.28 | 35.83 | 7.11E-01 | 15.08  | 22.08 | 4.94E-01 |
| cg20387258 | 21.88  | 10.67 | 4.04E-02 | 21.30  | 15.27 | 1.63E-01 | 17.79   | 28.37  | 5.31E-01 | 28.23  | 31.17 | 3.65E-01 | 22.33  | 21.23 | 2.93E-01 |
| cg23651812 | -34.83 | 16.99 | 4.04E-02 | -64.00 | 34.46 | 6.33E-02 | -29.82  | 89.75  | 7.40E-01 | -46.62 | 22.33 | 3.68E-02 | 13.86  | 32.60 | 6.71E-01 |
| cg09403392 | 40.14  | 19.59 | 4.04E-02 | 36.72  | 24.86 | 1.40E-01 | -15.02  | 80.42  | 8.52E-01 | 18.33  | 57.95 | 7.52E-01 | 78.46  | 43.18 | 6.92E-02 |
| cg16492851 | -11.71 | 5.71  | 4.04E-02 | -17.57 | 8.92  | 4.89E-02 | -7.20   | 11.23  | 5.21E-01 | -14.88 | 13.54 | 2.72E-01 | 0.12   | 14.64 | 9.93E-01 |
| cg25102449 | 8.58   | 4.19  | 4.05E-02 | 3.10   | 5.98  | 6.04E-01 | 17.12   | 9.13   | 6.07E-02 | 13.46  | 11.03 | 2.22E-01 | 9.77   | 10.63 | 3.58E-01 |
| cg03425412 | 21.61  | 10.55 | 4.05E-02 | 13.72  | 18.19 | 4.51E-01 | 23.54   | 29.57  | 4.26E-01 | 39.96  | 34.58 | 2.48E-01 | 23.20  | 15.84 | 1.43E-01 |
| cg14663983 | -7.30  | 3.56  | 4.05E-02 | -3.99  | 4.40  | 3.65E-01 | -5.38   | 7.64   | 4.81E-01 | -15.53 | 5.53  | 4.96E-03 | 5.19   | 13.76 | 7.06E-01 |
| cg13252580 | 4.93   | 2.41  | 4.05E-02 | 5.03   | 3.85  | 1.91E-01 | 7.17    | 5.70   | 2.09E-01 | 5.19   | 4.13  | 2.09E-01 | -0.74  | 7.88  | 9.26E-01 |
| cg13799263 | -11.63 | 5.68  | 4.05E-02 | -12.25 | 12.09 | 3.11E-01 | -8.68   | 23.00  | 7.06E-01 | -7.99  | 7.44  | 2.83E-01 | -27.51 | 15.38 | 7.36E-02 |
| cg07285181 | 7.50   | 3.66  | 4.05E-02 | 4.70   | 7.01  | 5.02E-01 | 9.50    | 8.70   | 2.75E-01 | 3.90   | 6.14  | 5.26E-01 | 16.21  | 8.31  | 5.09E-02 |
| cg14042190 | 3.99   | 1.95  | 4.05E-02 | 3.61   | 2.88  | 2.10E-01 | 5.41    | 4.05   | 1.81E-01 | 10.68  | 7.58  | 1.59E-01 | 1.54   | 3.93  | 6.95E-01 |
| cg07780199 | -11.21 | 5.47  | 4.05E-02 | -25.55 | 10.87 | 1.87E-02 | 2.07    | 14.11  | 8.84E-01 | -7.10  | 8.30  | 3.92E-01 | -12.14 | 13.61 | 3.72E-01 |
| cg15430659 | -8.89  | 4.34  | 4.05E-02 | -18.30 | 11.03 | 9.72E-02 | -2.42   | 13.04  | 8.53E-01 | -6.23  | 5.49  | 2.56E-01 | -17.28 | 13.08 | 1.87E-01 |
| cg18315125 | -7.07  | 3.45  | 4.05E-02 | -12.71 | 6.81  | 6.20E-02 | 4.16    | 11.84  | 7.25E-01 | -4.61  | 4.79  | 3.36E-01 | -12.70 | 9.25  | 1.70E-01 |
| cg13971574 | -31.18 | 15.22 | 4.05E-02 | -40.99 | 18.44 | 2.62E-02 | -4.12   | 59.20  | 9.45E-01 | 12.70  | 77.40 | 8.70E-01 | -16.24 | 32.90 | 6.22E-01 |
| cg12554290 | -12.21 | 5.96  | 4.05E-02 | -14.87 | 13.30 | 2.64E-01 | 16.15   | 23.79  | 4.97E-01 | -14.21 | 7.46  | 5.68E-02 | -11.96 | 19.10 | 5.31E-01 |
| cg25232541 | 12.39  | 6.05  | 4.05E-02 | 8.82   | 8.05  | 2.73E-01 | 10.02   | 13.01  | 4.41E-01 | 31.92  | 25.97 | 2.19E-01 | 21.22  | 14.84 | 1.53E-01 |
| cg01646109 | 48.84  | 23.84 | 4.05E-02 | 11.89  | 19.47 | 5.41E-01 | 73.28   | 77.47  | 3.44E-01 | 127.24 | 65.20 | 5.10E-02 | 67.27  | 28.39 | 1.78E-02 |
| cg12836011 | 15.57  | 7.60  | 4.05E-02 | 16.28  | 27.78 | 5.58E-01 | 4.80    | 44.57  | 9.14E-01 | 15.07  | 8.62  | 8.06E-02 | 21.07  | 22.03 | 3.39E-01 |
| cg26835374 | -5.21  | 2.54  | 4.05E-02 | -2.04  | 3.79  | 5.90E-01 | -6.70   | 4.87   | 1.69E-01 | -3.89  | 8.70  | 6.55E-01 | -11.05 | 5.78  | 5.59E-02 |
| cg05969018 | 11.87  | 5.80  | 4.05E-02 | 10.69  | 8.92  | 2.31E-01 | 14.12   | 11.71  | 2.28E-01 | 6.50   | 15.85 | 6.82E-01 | 15.22  | 12.98 | 2.41E-01 |
| cg25585985 | -46.68 | 22.78 | 4.05E-02 | -61.07 | 27.45 | 2.61E-02 | -72.97  | 122.99 | 5.53E-01 | -19.21 | 89.55 | 8.30E-01 | -4.02  | 49.50 | 9.35E-01 |
| cg09588792 | 43.18  | 21.08 | 4.05E-02 | 96.55  | 34.62 | 5.29E-03 | 58.99   | 123.61 | 6.33E-01 | 20.31  | 12.71 | 1.10E-01 | 40.86  | 49.27 | 4.07E-01 |
| cg03562978 | -11.10 | 5.42  | 4.05E-02 | -25.04 | 10.50 | 1.71E-02 | -1.98   | 12.15  | 8.71E-01 | -9.69  | 9.18  | 2.91E-01 | -3.56  | 12.52 | 7.76E-01 |
| cg02047577 | -52.46 | 25.61 | 4.05E-02 | -30.11 | 67.39 | 6.55E-01 | -32.80  | 263.01 | 9.01E-01 | -55.04 | 30.14 | 6.78E-02 | -64.92 | 72.62 | 3.71E-01 |
| cg01573616 | -50.82 | 24.81 | 4.05E-02 | -42.97 | 34.03 | 2.07E-01 | -126.71 | 69.50  | 6.83E-02 | -58.58 | 71.39 | 4.12E-01 | -21.65 | 52.84 | 6.82E-01 |
| cg16037200 | 18.64  | 9.10  | 4.05E-02 | 13.46  | 9.34  | 1.50E-01 | -0.94   | 16.94  | 9.56E-01 | 27.75  | 29.16 | 3.41E-01 | 43.58  | 16.13 | 6.90E-03 |

|            |        |       |          |        |       |          |        |        |          |        |       |          |         |       |          |
|------------|--------|-------|----------|--------|-------|----------|--------|--------|----------|--------|-------|----------|---------|-------|----------|
| cg25029615 | 30.90  | 15.09 | 4.05E-02 | 42.77  | 46.58 | 3.59E-01 | -57.03 | 193.02 | 7.68E-01 | 34.90  | 16.63 | 3.58E-02 | -29.93  | 58.84 | 6.11E-01 |
| cg13570101 | 13.08  | 6.38  | 4.05E-02 | 23.71  | 22.84 | 2.99E-01 | 9.74   | 50.04  | 8.46E-01 | 11.79  | 7.17  | 1.00E-01 | 15.18   | 18.92 | 4.22E-01 |
| cg09802627 | -18.11 | 8.84  | 4.05E-02 | -10.87 | 15.15 | 4.73E-01 | -41.74 | 25.78  | 1.05E-01 | -26.59 | 16.74 | 1.12E-01 | -7.94   | 17.23 | 6.45E-01 |
| cg27615388 | 8.41   | 4.10  | 4.05E-02 | 6.65   | 7.51  | 3.76E-01 | 19.43  | 10.49  | 6.40E-02 | 11.16  | 7.46  | 1.35E-01 | 0.26    | 8.29  | 9.75E-01 |
| cg12436377 | 9.03   | 4.41  | 4.05E-02 | 6.71   | 11.35 | 5.55E-01 | 17.99  | 26.97  | 5.05E-01 | 8.77   | 5.35  | 1.01E-01 | 11.02   | 11.60 | 3.42E-01 |
| cg16086570 | -12.74 | 6.22  | 4.05E-02 | -17.11 | 10.18 | 9.29E-02 | -8.96  | 15.52  | 5.64E-01 | -11.60 | 16.88 | 4.92E-01 | -10.10  | 10.80 | 3.50E-01 |
| cg13916421 | -11.31 | 5.52  | 4.05E-02 | -13.15 | 10.62 | 2.16E-01 | -8.74  | 11.08  | 4.30E-01 | -11.24 | 9.59  | 2.41E-01 | -12.41  | 14.26 | 3.84E-01 |
| cg08278002 | -7.45  | 3.64  | 4.05E-02 | -7.37  | 8.74  | 3.99E-01 | -2.71  | 12.33  | 8.26E-01 | -7.02  | 4.58  | 1.26E-01 | -13.81  | 10.98 | 2.09E-01 |
| cg21832142 | -11.03 | 5.39  | 4.05E-02 | -20.17 | 10.10 | 4.59E-02 | -3.50  | 13.08  | 7.89E-01 | -5.16  | 9.42  | 5.84E-01 | -13.75  | 11.49 | 2.32E-01 |
| cg07956264 | 21.28  | 10.39 | 4.05E-02 | 59.84  | 29.34 | 4.14E-02 | 113.77 | 107.60 | 2.90E-01 | 13.10  | 11.10 | 2.38E-01 | 29.11   | 33.84 | 3.90E-01 |
| cg06564900 | 12.46  | 6.08  | 4.05E-02 | 21.11  | 9.61  | 2.80E-02 | 1.76   | 19.52  | 9.28E-01 | 30.26  | 21.10 | 1.52E-01 | 3.12    | 9.40  | 7.40E-01 |
| cg18520696 | -7.22  | 3.52  | 4.06E-02 | -17.54 | 8.21  | 3.26E-02 | -15.33 | 14.29  | 2.83E-01 | -2.54  | 4.61  | 5.81E-01 | -9.19   | 8.54  | 2.82E-01 |
| cg02630790 | 16.36  | 7.99  | 4.06E-02 | 13.18  | 9.69  | 1.74E-01 | 47.95  | 26.88  | 7.44E-02 | 40.70  | 35.14 | 2.47E-01 | 5.91    | 18.80 | 7.53E-01 |
| cg08727311 | 11.19  | 5.47  | 4.06E-02 | 12.83  | 8.52  | 1.32E-01 | 13.46  | 10.04  | 1.80E-01 | 8.60   | 16.00 | 5.91E-01 | 5.26    | 13.05 | 6.87E-01 |
| cg11082447 | 12.99  | 6.34  | 4.06E-02 | 16.24  | 12.49 | 1.94E-01 | 43.41  | 24.67  | 7.85E-02 | 8.83   | 8.27  | 2.86E-01 | 8.43    | 21.45 | 6.94E-01 |
| cg08153335 | 22.01  | 10.75 | 4.06E-02 | -3.41  | 21.90 | 8.76E-01 | 47.43  | 26.29  | 7.13E-02 | 18.55  | 15.25 | 2.24E-01 | 47.25   | 29.03 | 1.04E-01 |
| cg13686648 | -90.27 | 44.08 | 4.06E-02 | -89.85 | 62.55 | 1.51E-01 | 257.38 | 218.98 | 2.40E-01 | -97.78 | 96.79 | 3.12E-01 | -140.17 | 87.22 | 1.08E-01 |
| cg25217636 | 22.75  | 11.11 | 4.06E-02 | 14.06  | 13.35 | 2.92E-01 | 62.22  | 34.64  | 7.25E-02 | 23.26  | 67.00 | 7.28E-01 | 33.77   | 26.41 | 2.01E-01 |
| cg09187107 | 5.33   | 2.60  | 4.06E-02 | 4.87   | 3.24  | 1.32E-01 | 9.19   | 6.07   | 1.30E-01 | 6.02   | 11.56 | 6.03E-01 | 1.57    | 7.48  | 8.34E-01 |
| cg19263124 | -11.24 | 5.49  | 4.06E-02 | -22.59 | 15.46 | 1.44E-01 | 24.48  | 24.85  | 3.25E-01 | -11.87 | 6.37  | 6.22E-02 | -9.26   | 19.09 | 6.28E-01 |
| cg23972738 | 14.33  | 7.00  | 4.06E-02 | 14.87  | 10.34 | 1.51E-01 | 2.94   | 18.54  | 8.74E-01 | 40.61  | 25.88 | 1.17E-01 | 12.65   | 12.23 | 3.01E-01 |
| cg10002850 | -46.34 | 22.63 | 4.06E-02 | -83.22 | 34.58 | 1.61E-02 | -36.81 | 93.42  | 6.94E-01 | -51.72 | 74.50 | 4.88E-01 | -8.96   | 34.88 | 7.97E-01 |
| cg03690837 | 25.79  | 12.59 | 4.06E-02 | 1.61   | 38.70 | 9.67E-01 | 164.36 | 109.40 | 1.33E-01 | 22.77  | 14.16 | 1.08E-01 | 60.17   | 41.88 | 1.51E-01 |
| cg00426089 | -13.64 | 6.66  | 4.06E-02 | -28.57 | 15.96 | 7.35E-02 | 9.03   | 26.69  | 7.35E-01 | -8.60  | 8.20  | 2.94E-01 | -34.14  | 20.64 | 9.81E-02 |
| cg03728457 | 40.13  | 19.60 | 4.06E-02 | 32.04  | 25.09 | 2.02E-01 | -9.87  | 101.28 | 9.22E-01 | 79.47  | 60.31 | 1.88E-01 | 50.85   | 39.41 | 1.97E-01 |
| cg00012576 | -9.64  | 4.71  | 4.06E-02 | -14.18 | 6.71  | 3.46E-02 | -1.12  | 11.87  | 9.25E-01 | -4.81  | 15.25 | 7.53E-01 | -7.95   | 9.32  | 3.93E-01 |
| cg11256132 | -13.04 | 6.37  | 4.06E-02 | -21.25 | 15.88 | 1.81E-01 | 2.93   | 24.18  | 9.04E-01 | -11.20 | 7.77  | 1.49E-01 | -23.45  | 20.34 | 2.49E-01 |
| cg04820386 | -16.66 | 8.14  | 4.06E-02 | -29.30 | 22.87 | 2.00E-01 | -2.24  | 100.53 | 9.82E-01 | -12.47 | 9.31  | 1.80E-01 | -33.00  | 25.27 | 1.92E-01 |
| cg01850135 | -5.65  | 2.76  | 4.06E-02 | -5.31  | 3.34  | 1.12E-01 | -11.49 | 6.70   | 8.66E-02 | 10.50  | 11.07 | 3.43E-01 | -8.57   | 9.45  | 3.65E-01 |
| cg03636215 | 26.93  | 13.15 | 4.06E-02 | 43.71  | 36.59 | 2.32E-01 | 224.70 | 186.28 | 2.28E-01 | 27.47  | 14.73 | 6.21E-02 | -25.31  | 50.20 | 6.14E-01 |
| cg16747109 | 18.62  | 9.09  | 4.06E-02 | 20.93  | 13.30 | 1.16E-01 | 11.67  | 21.82  | 5.93E-01 | -16.98 | 27.78 | 5.41E-01 | 34.23   | 18.11 | 5.87E-02 |
| cg00966959 | -23.90 | 11.67 | 4.06E-02 | -32.35 | 15.94 | 4.24E-02 | -13.48 | 27.67  | 6.26E-01 | 27.05  | 58.42 | 6.43E-01 | -21.29  | 23.54 | 3.66E-01 |
| cg04259168 | 17.75  | 8.67  | 4.06E-02 | 14.00  | 15.27 | 3.59E-01 | 29.09  | 15.24  | 5.63E-02 | 13.94  | 21.00 | 5.07E-01 | 7.90    | 20.23 | 6.96E-01 |
| cg09913449 | -7.19  | 3.51  | 4.06E-02 | -19.12 | 10.17 | 6.02E-02 | 13.40  | 15.78  | 3.96E-01 | -7.34  | 3.51  | 3.64E-02 | -3.71   | 9.36  | 6.91E-01 |
| cg11964006 | -8.22  | 4.02  | 4.06E-02 | -19.73 | 8.14  | 1.53E-02 | -2.00  | 10.81  | 8.53E-01 | -3.71  | 5.04  | 4.61E-01 | -12.36  | 10.66 | 2.46E-01 |

|            |        |       |          |        |       |          |        |        |          |        |       |          |         |       |          |
|------------|--------|-------|----------|--------|-------|----------|--------|--------|----------|--------|-------|----------|---------|-------|----------|
| cg19183733 | -7.35  | 3.59  | 4.06E-02 | -8.76  | 6.97  | 2.09E-01 | -0.38  | 11.89  | 9.75E-01 | -6.67  | 4.97  | 1.79E-01 | -12.43  | 10.32 | 2.28E-01 |
| cg11155697 | 65.87  | 32.17 | 4.06E-02 | 76.22  | 43.03 | 7.65E-02 | -62.77 | 244.81 | 7.98E-01 | 37.33  | 69.30 | 5.90E-01 | 78.26   | 70.44 | 2.67E-01 |
| cg03334425 | 21.78  | 10.64 | 4.06E-02 | 8.96   | 30.56 | 7.69E-01 | -8.70  | 80.63  | 9.14E-01 | 23.28  | 12.22 | 5.68E-02 | 30.90   | 33.01 | 3.49E-01 |
| cg01271325 | 12.56  | 6.13  | 4.06E-02 | 18.39  | 9.43  | 5.10E-02 | -14.46 | 21.49  | 5.01E-01 | 1.83   | 11.58 | 8.74E-01 | 20.35   | 9.24  | 2.77E-02 |
| cg24553364 | 27.00  | 13.18 | 4.06E-02 | 19.32  | 15.79 | 2.21E-01 | -19.62 | 76.73  | 7.98E-01 | 75.91  | 56.12 | 1.76E-01 | 45.50   | 28.25 | 1.07E-01 |
| cg10416105 | -26.81 | 13.10 | 4.06E-02 | -11.55 | 30.37 | 7.04E-01 | -75.35 | 156.38 | 6.30E-01 | -33.50 | 15.56 | 3.13E-02 | -4.03   | 41.76 | 9.23E-01 |
| cg19821713 | 13.55  | 6.62  | 4.06E-02 | 22.92  | 8.40  | 6.37E-03 | 8.90   | 14.22  | 5.32E-01 | 25.45  | 15.60 | 1.03E-01 | -0.82   | 9.69  | 9.32E-01 |
| cg06097557 | 12.49  | 6.10  | 4.06E-02 | 8.35   | 7.86  | 2.88E-01 | 37.50  | 19.08  | 4.94E-02 | 32.13  | 25.98 | 2.16E-01 | 7.72    | 12.42 | 5.34E-01 |
| cg16397480 | -46.45 | 22.69 | 4.06E-02 | -27.22 | 26.93 | 3.12E-01 | -53.66 | 125.09 | 6.68E-01 | -66.51 | 83.81 | 4.27E-01 | -111.21 | 52.84 | 3.53E-02 |
| cg27004243 | 13.07  | 6.38  | 4.06E-02 | 10.49  | 7.32  | 1.52E-01 | -31.56 | 57.58  | 5.84E-01 | 48.88  | 44.26 | 2.69E-01 | 21.60   | 14.02 | 1.24E-01 |
| cg02931247 | 19.64  | 9.59  | 4.06E-02 | 6.54   | 15.07 | 6.64E-01 | 36.88  | 20.90  | 7.77E-02 | 21.92  | 18.26 | 2.30E-01 | 29.41   | 29.21 | 3.14E-01 |
| cg26083752 | 16.13  | 7.88  | 4.06E-02 | 14.82  | 16.35 | 3.65E-01 | 12.48  | 26.78  | 6.41E-01 | 20.36  | 10.24 | 4.67E-02 | -5.06   | 26.39 | 8.48E-01 |
| cg25908985 | 12.48  | 6.10  | 4.06E-02 | 26.55  | 18.99 | 1.62E-01 | 19.76  | 75.21  | 7.93E-01 | 12.20  | 6.87  | 7.56E-02 | 0.00    | 19.06 | 1.00E+00 |
| cg10402471 | -22.40 | 10.94 | 4.06E-02 | 5.30   | 21.74 | 8.07E-01 | -23.78 | 48.39  | 6.23E-01 | -36.68 | 12.33 | 2.92E-03 | -5.24   | 29.78 | 8.60E-01 |
| cg02021529 | -8.27  | 4.04  | 4.06E-02 | -8.88  | 7.33  | 2.26E-01 | -1.50  | 9.48   | 8.74E-01 | -6.62  | 7.00  | 3.44E-01 | -16.94  | 9.44  | 7.28E-02 |
| cg01104208 | -11.43 | 5.58  | 4.06E-02 | -17.14 | 8.98  | 5.64E-02 | -10.21 | 10.76  | 3.42E-01 | -17.80 | 13.90 | 2.00E-01 | 4.49    | 13.07 | 7.32E-01 |
| cg16039869 | -9.28  | 4.53  | 4.06E-02 | -11.38 | 6.14  | 6.39E-02 | -10.54 | 11.42  | 3.56E-01 | 0.28   | 23.65 | 9.91E-01 | -5.49   | 8.87  | 5.36E-01 |
| cg01241390 | 4.77   | 2.33  | 4.06E-02 | 4.73   | 3.30  | 1.51E-01 | 7.64   | 6.06   | 2.07E-01 | 4.67   | 4.79  | 3.29E-01 | 1.45    | 6.87  | 8.32E-01 |
| cg19683960 | 11.23  | 5.48  | 4.06E-02 | 14.96  | 7.38  | 4.27E-02 | 2.76   | 12.86  | 8.30E-01 | 6.28   | 18.60 | 7.36E-01 | 10.71   | 12.93 | 4.07E-01 |
| cg02788021 | 6.01   | 2.94  | 4.07E-02 | 5.75   | 3.78  | 1.28E-01 | 8.76   | 7.01   | 2.11E-01 | 12.36  | 12.24 | 3.13E-01 | 1.75    | 7.30  | 8.11E-01 |
| cg03625953 | 11.36  | 5.55  | 4.07E-02 | 10.05  | 8.15  | 2.17E-01 | 15.96  | 12.79  | 2.12E-01 | 1.89   | 12.24 | 8.77E-01 | 23.25   | 14.72 | 1.14E-01 |
| cg21359254 | -26.25 | 12.82 | 4.07E-02 | -26.51 | 17.23 | 1.24E-01 | 23.86  | 148.00 | 8.72E-01 | -32.13 | 22.15 | 1.47E-01 | -9.47   | 39.82 | 8.12E-01 |
| cg10520500 | -23.14 | 11.31 | 4.07E-02 | -36.63 | 19.19 | 5.63E-02 | 17.13  | 27.78  | 5.37E-01 | -17.63 | 8.92  | 4.80E-02 | -57.21  | 26.39 | 3.02E-02 |
| cg11973602 | 27.36  | 13.37 | 4.07E-02 | 23.99  | 15.98 | 1.33E-01 | 33.50  | 66.43  | 6.14E-01 | 24.65  | 47.57 | 6.04E-01 | 40.23   | 31.44 | 2.01E-01 |
| cg09792204 | 19.87  | 9.71  | 4.07E-02 | 6.95   | 27.77 | 8.02E-01 | 0.15   | 82.14  | 9.98E-01 | 20.86  | 10.94 | 5.65E-02 | 34.06   | 35.23 | 3.34E-01 |
| cg22708897 | -6.92  | 3.38  | 4.07E-02 | -14.85 | 5.85  | 1.12E-02 | 4.70   | 9.13   | 6.07E-01 | -5.38  | 4.38  | 2.19E-01 | -6.64   | 7.50  | 3.76E-01 |
| cg02475695 | 16.43  | 8.02  | 4.07E-02 | 4.60   | 15.04 | 7.60E-01 | 12.08  | 14.26  | 3.97E-01 | 35.32  | 17.89 | 4.84E-02 | 21.22   | 18.06 | 2.40E-01 |
| cg09465142 | 9.66   | 4.72  | 4.07E-02 | 9.43   | 6.02  | 1.18E-01 | 14.54  | 12.72  | 2.53E-01 | 17.03  | 14.16 | 2.29E-01 | -0.16   | 12.76 | 9.90E-01 |
| cg23910931 | 17.99  | 8.79  | 4.07E-02 | 18.03  | 20.02 | 3.68E-01 | 36.62  | 19.96  | 6.66E-02 | 9.42   | 12.61 | 4.55E-01 | 22.30   | 24.63 | 3.65E-01 |
| cg22953168 | -17.64 | 8.62  | 4.07E-02 | -23.08 | 20.10 | 2.51E-01 | -24.98 | 40.38  | 5.36E-01 | -13.62 | 10.52 | 1.96E-01 | -31.32  | 27.29 | 2.51E-01 |
| cg19051213 | -7.90  | 3.86  | 4.07E-02 | -7.91  | 5.82  | 1.74E-01 | -3.48  | 10.92  | 7.50E-01 | -7.49  | 9.09  | 4.10E-01 | -10.35  | 7.65  | 1.76E-01 |
| cg20029311 | 15.50  | 7.57  | 4.07E-02 | 22.62  | 10.01 | 2.39E-02 | 14.63  | 33.84  | 6.65E-01 | 16.02  | 31.53 | 6.11E-01 | 2.82    | 13.38 | 8.33E-01 |
| cg16993794 | 35.27  | 17.23 | 4.07E-02 | 13.25  | 22.70 | 5.59E-01 | 82.03  | 66.14  | 2.15E-01 | 42.12  | 73.84 | 5.68E-01 | 65.57   | 31.38 | 3.67E-02 |
| cg12833207 | 13.75  | 6.72  | 4.07E-02 | 23.76  | 21.26 | 2.64E-01 | 36.75  | 29.16  | 2.08E-01 | 18.77  | 9.03  | 3.77E-02 | -2.97   | 12.29 | 8.09E-01 |
| cg10201712 | -9.75  | 4.76  | 4.07E-02 | -19.84 | 10.43 | 5.72E-02 | -15.22 | 19.60  | 4.37E-01 | -4.08  | 4.98  | 4.13E-01 | -24.59  | 14.85 | 9.77E-02 |

|               |        |       |          |        |       |          |        |        |          |        |       |          |        |       |          |
|---------------|--------|-------|----------|--------|-------|----------|--------|--------|----------|--------|-------|----------|--------|-------|----------|
| cg24480515    | -13.95 | 6.81  | 4.07E-02 | -9.43  | 16.79 | 5.74E-01 | -30.09 | 29.94  | 3.15E-01 | -12.02 | 8.01  | 1.33E-01 | -35.76 | 27.90 | 2.00E-01 |
| ch.3.1045756F | -36.71 | 17.93 | 4.07E-02 | -46.57 | 20.54 | 2.34E-02 | 38.35  | 136.47 | 7.79E-01 | -80.73 | 95.45 | 3.98E-01 | 5.38   | 41.71 | 8.97E-01 |
| cg27407385    | -19.64 | 9.60  | 4.07E-02 | -52.95 | 20.08 | 8.36E-03 | -0.85  | 26.22  | 9.74E-01 | -14.45 | 8.17  | 7.70E-02 | -9.76  | 30.17 | 7.46E-01 |
| cg17386093    | 13.75  | 6.72  | 4.07E-02 | 19.14  | 23.66 | 4.19E-01 | 49.11  | 47.14  | 2.98E-01 | 10.04  | 7.48  | 1.80E-01 | 33.48  | 21.99 | 1.28E-01 |
| cg11758283    | -14.16 | 6.92  | 4.07E-02 | 1.39   | 14.51 | 9.24E-01 | -21.05 | 20.62  | 3.07E-01 | -17.30 | 9.22  | 6.06E-02 | -24.30 | 22.17 | 2.73E-01 |
| cg03975815    | -8.69  | 4.25  | 4.07E-02 | -19.63 | 9.83  | 4.59E-02 | -3.28  | 15.08  | 8.28E-01 | -5.82  | 5.34  | 2.76E-01 | -10.68 | 13.29 | 4.22E-01 |
| cg15559186    | 24.50  | 11.97 | 4.07E-02 | 3.27   | 25.36 | 8.97E-01 | 60.34  | 76.06  | 4.28E-01 | 29.37  | 14.62 | 4.45E-02 | 31.53  | 41.88 | 4.52E-01 |
| cg08977266    | 41.55  | 20.30 | 4.07E-02 | 17.98  | 43.85 | 6.82E-01 | -84.55 | 250.01 | 7.35E-01 | 56.93  | 24.30 | 1.91E-02 | -18.50 | 71.41 | 7.96E-01 |
| cg22763586    | -6.37  | 3.11  | 4.07E-02 | -8.34  | 4.53  | 6.58E-02 | -11.78 | 7.51   | 1.17E-01 | 4.08   | 7.85  | 6.04E-01 | -5.30  | 7.00  | 4.49E-01 |
| cg19046697    | 22.49  | 10.99 | 4.07E-02 | 19.53  | 16.61 | 2.40E-01 | 42.13  | 34.37  | 2.20E-01 | 2.07   | 46.59 | 9.65E-01 | 23.53  | 17.28 | 1.73E-01 |
| cg04487205    | -6.65  | 3.25  | 4.07E-02 | -1.35  | 2.94  | 6.47E-01 | -4.37  | 4.95   | 3.77E-01 | -14.02 | 8.29  | 9.05E-02 | -12.78 | 4.46  | 4.14E-03 |
| cg04800195    | 20.71  | 10.12 | 4.07E-02 | 12.59  | 13.16 | 3.39E-01 | -4.62  | 43.52  | 9.16E-01 | 10.09  | 58.52 | 8.63E-01 | 40.69  | 17.76 | 2.20E-02 |
| cg07070341    | 18.64  | 9.11  | 4.07E-02 | 7.60   | 19.00 | 6.89E-01 | 40.68  | 35.59  | 2.53E-01 | 18.77  | 11.91 | 1.15E-01 | 27.16  | 26.38 | 3.03E-01 |
| cg18156486    | 5.33   | 2.60  | 4.07E-02 | 5.90   | 3.56  | 9.71E-02 | 5.37   | 6.30   | 3.94E-01 | 5.10   | 8.60  | 5.53E-01 | 3.87   | 5.80  | 5.04E-01 |
| cg04236512    | -9.81  | 4.80  | 4.07E-02 | -19.44 | 12.65 | 1.24E-01 | 0.87   | 16.36  | 9.58E-01 | -9.06  | 5.79  | 1.18E-01 | -10.39 | 16.45 | 5.27E-01 |
| cg24691792    | -9.42  | 4.61  | 4.07E-02 | -12.26 | 11.13 | 2.71E-01 | -12.76 | 14.04  | 3.63E-01 | -6.00  | 5.93  | 3.12E-01 | -19.69 | 13.37 | 1.41E-01 |
| cg00028507    | -13.35 | 6.52  | 4.07E-02 | -11.96 | 9.74  | 2.20E-01 | -23.50 | 13.12  | 7.33E-02 | -1.77  | 18.19 | 9.22E-01 | -11.09 | 15.55 | 4.76E-01 |
| cg15597770    | 14.14  | 6.91  | 4.07E-02 | 11.79  | 16.25 | 4.68E-01 | 4.07   | 23.79  | 8.64E-01 | 16.74  | 8.41  | 4.65E-02 | 6.04   | 28.26 | 8.31E-01 |
| cg09504692    | 13.58  | 6.64  | 4.07E-02 | 11.55  | 9.93  | 2.45E-01 | 9.22   | 19.13  | 6.30E-01 | 19.44  | 11.56 | 9.26E-02 | 8.74   | 20.60 | 6.71E-01 |
| cg20704972    | -13.91 | 6.80  | 4.08E-02 | -22.67 | 14.39 | 1.15E-01 | -12.10 | 17.20  | 4.82E-01 | -7.74  | 10.78 | 4.73E-01 | -17.39 | 14.37 | 2.26E-01 |
| cg17002518    | 9.62   | 4.70  | 4.08E-02 | 6.85   | 9.92  | 4.90E-01 | 10.39  | 9.28   | 2.63E-01 | 9.21   | 7.25  | 2.04E-01 | 15.71  | 15.01 | 2.95E-01 |
| cg00935421    | 11.83  | 5.78  | 4.08E-02 | 13.61  | 8.21  | 9.75E-02 | 10.93  | 11.64  | 3.48E-01 | 8.47   | 19.10 | 6.58E-01 | 9.72   | 14.20 | 4.94E-01 |
| cg20758791    | 14.52  | 7.10  | 4.08E-02 | 15.61  | 17.77 | 3.80E-01 | 21.78  | 23.24  | 3.49E-01 | 14.27  | 8.63  | 9.83E-02 | 4.96   | 26.56 | 8.52E-01 |
| cg15562220    | 11.05  | 5.40  | 4.08E-02 | 13.20  | 9.71  | 1.74E-01 | 15.86  | 11.33  | 1.61E-01 | 18.36  | 12.92 | 1.55E-01 | 0.51   | 10.06 | 9.59E-01 |
| cg16319517    | -18.34 | 8.96  | 4.08E-02 | -34.53 | 12.31 | 5.01E-03 | 0.06   | 19.35  | 9.97E-01 | -6.63  | 7.63  | 3.85E-01 | -34.45 | 16.64 | 3.84E-02 |
| cg05008898    | -10.59 | 5.17  | 4.08E-02 | -14.18 | 8.25  | 8.57E-02 | -7.64  | 12.30  | 5.35E-01 | -6.45  | 10.62 | 5.44E-01 | -11.07 | 11.81 | 3.49E-01 |
| cg20248082    | 24.44  | 11.94 | 4.08E-02 | 22.96  | 14.71 | 1.19E-01 | 79.85  | 52.42  | 1.28E-01 | 67.64  | 54.78 | 2.17E-01 | 8.03   | 24.32 | 7.41E-01 |
| cg23270841    | -9.83  | 4.81  | 4.08E-02 | -3.23  | 12.37 | 7.94E-01 | -9.58  | 16.81  | 5.69E-01 | -12.68 | 5.82  | 2.95E-02 | 0.88   | 16.39 | 9.57E-01 |
| cg27317813    | 6.60   | 3.23  | 4.08E-02 | 6.36   | 4.48  | 1.55E-01 | 12.85  | 7.05   | 6.84E-02 | 0.46   | 10.39 | 9.65E-01 | 3.21   | 7.72  | 6.77E-01 |
| cg02224864    | 21.30  | 10.41 | 4.08E-02 | -10.78 | 29.46 | 7.15E-01 | -42.13 | 75.12  | 5.75E-01 | 28.64  | 11.70 | 1.44E-02 | 12.24  | 40.92 | 7.65E-01 |
| cg10004897    | 8.36   | 4.09  | 4.08E-02 | 9.93   | 5.86  | 9.02E-02 | 14.26  | 10.79  | 1.86E-01 | 8.23   | 9.74  | 3.98E-01 | 0.17   | 9.30  | 9.86E-01 |
| cg17811919    | 38.56  | 18.85 | 4.08E-02 | 57.82  | 30.57 | 5.86E-02 | 124.53 | 97.66  | 2.02E-01 | 54.36  | 45.87 | 2.36E-01 | 6.67   | 29.31 | 8.20E-01 |
| cg07593523    | 4.78   | 2.34  | 4.08E-02 | 3.48   | 3.79  | 3.59E-01 | 4.86   | 5.01   | 3.32E-01 | 8.82   | 5.41  | 1.03E-01 | 3.50   | 5.01  | 4.84E-01 |
| cg08480223    | 14.81  | 7.24  | 4.08E-02 | 25.84  | 12.38 | 3.69E-02 | 0.64   | 20.87  | 9.76E-01 | 16.62  | 15.55 | 2.85E-01 | 7.17   | 12.79 | 5.75E-01 |
| cg23568912    | 27.11  | 13.25 | 4.08E-02 | 52.61  | 44.80 | 2.40E-01 | -17.27 | 153.41 | 9.10E-01 | 28.21  | 14.48 | 5.13E-02 | -15.07 | 51.21 | 7.69E-01 |

|            |        |       |          |        |       |          |        |       |          |        |       |          |        |       |          |
|------------|--------|-------|----------|--------|-------|----------|--------|-------|----------|--------|-------|----------|--------|-------|----------|
| cg12049550 | 5.78   | 2.83  | 4.08E-02 | 5.75   | 3.59  | 1.09E-01 | 7.62   | 7.90  | 3.34E-01 | 10.25  | 8.68  | 2.37E-01 | 1.03   | 7.43  | 8.90E-01 |
| cg25329734 | -22.91 | 11.20 | 4.08E-02 | -27.17 | 12.63 | 3.15E-02 | -0.16  | 41.28 | 9.97E-01 | 29.00  | 45.88 | 5.27E-01 | -40.52 | 39.47 | 3.05E-01 |
| cg19570897 | 8.75   | 4.28  | 4.08E-02 | 8.85   | 5.42  | 1.02E-01 | 21.96  | 12.73 | 8.45E-02 | 18.21  | 14.11 | 1.97E-01 | -2.71  | 9.26  | 7.70E-01 |
| cg04093633 | 6.86   | 3.35  | 4.08E-02 | 4.94   | 4.29  | 2.50E-01 | 12.21  | 6.94  | 7.87E-02 | 18.30  | 9.79  | 6.17E-02 | -1.20  | 7.54  | 8.74E-01 |
| cg15588215 | 10.55  | 5.16  | 4.08E-02 | 12.31  | 9.09  | 1.76E-01 | 21.19  | 15.42 | 1.69E-01 | 13.19  | 9.82  | 1.79E-01 | 2.01   | 9.55  | 8.33E-01 |
| cg17245726 | -7.73  | 3.78  | 4.08E-02 | -16.26 | 7.14  | 2.28E-02 | -9.37  | 9.86  | 3.42E-01 | -0.45  | 6.03  | 9.41E-01 | -8.98  | 8.87  | 3.11E-01 |
| cg19370054 | 17.32  | 8.47  | 4.08E-02 | 10.97  | 10.43 | 2.93E-01 | 19.06  | 17.97 | 2.89E-01 | 63.98  | 27.04 | 1.80E-02 | 10.54  | 15.42 | 4.94E-01 |
| cg24371534 | -28.01 | 13.69 | 4.08E-02 | -15.48 | 18.03 | 3.91E-01 | 8.00   | 25.53 | 7.54E-01 | -49.02 | 21.27 | 2.12E-02 | -54.76 | 24.32 | 2.43E-02 |
| cg07743122 | 18.82  | 9.20  | 4.08E-02 | 20.93  | 19.17 | 2.75E-01 | 34.55  | 19.52 | 7.67E-02 | 9.15   | 14.31 | 5.22E-01 | 18.93  | 25.13 | 4.51E-01 |
| cg03044407 | 16.00  | 7.82  | 4.08E-02 | 28.71  | 11.31 | 1.11E-02 | -5.61  | 17.90 | 7.54E-01 | 10.03  | 27.30 | 7.13E-01 | 10.12  | 15.67 | 5.18E-01 |
| cg02692964 | 10.60  | 5.18  | 4.08E-02 | 27.51  | 19.19 | 1.52E-01 | -2.82  | 86.46 | 9.74E-01 | 8.65   | 5.61  | 1.23E-01 | 17.69  | 19.82 | 3.72E-01 |
| cg22962714 | 7.44   | 3.64  | 4.08E-02 | 14.37  | 6.59  | 2.92E-02 | 1.12   | 7.12  | 8.75E-01 | 4.61   | 6.85  | 5.01E-01 | 9.69   | 9.34  | 3.00E-01 |
| cg24358781 | -9.75  | 4.76  | 4.08E-02 | -1.89  | 10.31 | 8.55E-01 | 3.42   | 17.22 | 8.43E-01 | -12.78 | 6.14  | 3.74E-02 | -17.75 | 14.53 | 2.22E-01 |
| cg18683309 | 18.88  | 9.23  | 4.08E-02 | 26.50  | 21.53 | 2.18E-01 | 33.89  | 21.17 | 1.09E-01 | 9.35   | 12.53 | 4.56E-01 | 29.81  | 31.90 | 3.50E-01 |
| cg16529592 | -10.86 | 5.31  | 4.08E-02 | -10.82 | 7.70  | 1.60E-01 | -18.22 | 12.13 | 1.33E-01 | -0.10  | 14.33 | 9.94E-01 | -11.33 | 12.03 | 3.46E-01 |
| cg13552742 | -11.86 | 5.80  | 4.08E-02 | -6.78  | 6.99  | 3.33E-01 | -1.16  | 11.41 | 9.19E-01 | -30.88 | 10.74 | 4.04E-03 | -11.37 | 9.59  | 2.36E-01 |
| cg01490094 | 19.51  | 9.54  | 4.08E-02 | 22.82  | 15.71 | 1.46E-01 | 13.81  | 30.96 | 6.56E-01 | 25.82  | 22.13 | 2.43E-01 | 14.22  | 16.10 | 3.77E-01 |
| cg18498565 | 4.14   | 2.03  | 4.08E-02 | 6.49   | 3.22  | 4.36E-02 | -0.59  | 4.42  | 8.93E-01 | 3.31   | 3.57  | 3.55E-01 | 8.76   | 7.55  | 2.46E-01 |
| cg14864572 | 14.23  | 6.96  | 4.08E-02 | -11.00 | 16.88 | 5.15E-01 | 9.94   | 26.91 | 7.12E-01 | 21.33  | 8.02  | 7.83E-03 | 10.07  | 23.54 | 6.69E-01 |
| cg00753630 | 17.94  | 8.77  | 4.08E-02 | 26.43  | 11.98 | 2.74E-02 | 36.58  | 21.12 | 8.32E-02 | 21.10  | 23.12 | 3.62E-01 | -2.79  | 13.73 | 8.39E-01 |
| cg15175242 | 22.50  | 11.00 | 4.08E-02 | 7.07   | 17.89 | 6.93E-01 | -0.88  | 21.08 | 9.67E-01 | 38.36  | 18.06 | 3.37E-02 | 44.61  | 20.50 | 2.95E-02 |
| cg10904061 | -14.96 | 7.32  | 4.08E-02 | -24.46 | 15.29 | 1.10E-01 | -12.58 | 17.04 | 4.60E-01 | -16.68 | 12.62 | 1.86E-01 | -5.74  | 14.62 | 6.94E-01 |
| cg13884903 | 15.21  | 7.44  | 4.08E-02 | 10.33  | 10.25 | 3.14E-01 | 26.72  | 21.69 | 2.18E-01 | 42.39  | 36.74 | 2.49E-01 | 15.55  | 13.25 | 2.41E-01 |
| cg15961105 | 17.92  | 8.76  | 4.08E-02 | 19.31  | 17.28 | 2.64E-01 | 9.25   | 38.04 | 8.08E-01 | 19.16  | 11.80 | 1.05E-01 | 13.75  | 23.52 | 5.59E-01 |
| cg15620146 | 9.92   | 4.85  | 4.08E-02 | 10.62  | 9.84  | 2.80E-01 | 4.79   | 12.04 | 6.90E-01 | 12.70  | 7.34  | 8.35E-02 | 6.42   | 12.22 | 5.99E-01 |
| cg27546431 | 4.62   | 2.26  | 4.08E-02 | 4.78   | 2.87  | 9.52E-02 | 5.16   | 4.06  | 2.04E-01 | 2.76   | 18.21 | 8.80E-01 | 0.14   | 9.82  | 9.88E-01 |
| cg12089204 | 13.33  | 6.52  | 4.08E-02 | 28.93  | 18.61 | 1.20E-01 | 11.08  | 35.88 | 7.57E-01 | 12.41  | 7.35  | 9.12E-02 | -6.24  | 27.34 | 8.19E-01 |
| cg25223634 | 7.34   | 3.59  | 4.08E-02 | 6.23   | 5.25  | 2.35E-01 | 6.01   | 6.84  | 3.80E-01 | 8.21   | 10.43 | 4.31E-01 | 12.89  | 9.58  | 1.79E-01 |
| cg13765061 | 6.64   | 3.25  | 4.08E-02 | 5.37   | 4.12  | 1.93E-01 | 12.64  | 8.85  | 1.53E-01 | 17.18  | 12.92 | 1.84E-01 | 2.88   | 7.63  | 7.06E-01 |
| cg08058213 | -8.22  | 4.02  | 4.08E-02 | -4.62  | 7.02  | 5.10E-01 | -12.30 | 11.92 | 3.02E-01 | -7.98  | 5.92  | 1.78E-01 | -16.64 | 12.85 | 1.96E-01 |
| cg26529344 | 26.44  | 12.93 | 4.08E-02 | 45.69  | 18.01 | 1.12E-02 | 70.81  | 45.04 | 1.16E-01 | 6.94   | 12.43 | 5.77E-01 | 23.78  | 29.15 | 4.15E-01 |
| cg21229170 | 12.71  | 6.22  | 4.08E-02 | -1.08  | 10.04 | 9.14E-01 | 24.75  | 24.82 | 3.19E-01 | 20.07  | 9.42  | 3.32E-02 | 21.94  | 16.55 | 1.85E-01 |
| cg17080163 | 14.79  | 7.23  | 4.08E-02 | 10.02  | 7.87  | 2.03E-01 | 23.62  | 13.55 | 8.14E-02 | 37.16  | 13.87 | 7.39E-03 | 0.95   | 8.94  | 9.15E-01 |
| cg17459387 | 10.25  | 5.01  | 4.09E-02 | 10.75  | 7.28  | 1.40E-01 | 18.13  | 12.73 | 1.54E-01 | 16.79  | 13.74 | 2.22E-01 | 0.46   | 10.28 | 9.65E-01 |
| cg02756176 | -7.31  | 3.58  | 4.09E-02 | -7.47  | 4.83  | 1.22E-01 | -5.45  | 9.92  | 5.82E-01 | -4.97  | 9.45  | 5.99E-01 | -10.07 | 8.45  | 2.34E-01 |

|            |        |       |          |        |       |          |        |       |          |        |       |          |        |       |          |
|------------|--------|-------|----------|--------|-------|----------|--------|-------|----------|--------|-------|----------|--------|-------|----------|
| cg17205928 | -9.62  | 4.71  | 4.09E-02 | -8.09  | 6.93  | 2.43E-01 | -7.93  | 11.65 | 4.96E-01 | -16.43 | 16.01 | 3.05E-01 | -10.99 | 8.75  | 2.09E-01 |
| cg07363182 | -13.00 | 6.36  | 4.09E-02 | -31.45 | 14.93 | 3.52E-02 | -31.18 | 23.92 | 1.92E-01 | -7.17  | 7.79  | 3.57E-01 | -3.87  | 22.25 | 8.62E-01 |
| cg20793071 | 10.74  | 5.25  | 4.09E-02 | 14.72  | 7.21  | 4.11E-02 | 9.70   | 15.41 | 5.29E-01 | 1.55   | 17.80 | 9.31E-01 | 6.26   | 10.19 | 5.39E-01 |
| cg05726556 | 18.72  | 9.16  | 4.09E-02 | 18.88  | 18.48 | 3.07E-01 | 29.94  | 17.90 | 9.43E-02 | 8.86   | 14.83 | 5.50E-01 | 25.71  | 27.36 | 3.47E-01 |
| cg26052635 | -14.74 | 7.21  | 4.09E-02 | -16.05 | 10.46 | 1.25E-01 | 11.54  | 18.03 | 5.22E-01 | -33.57 | 22.91 | 1.43E-01 | -20.98 | 13.70 | 1.26E-01 |
| cg03669357 | -9.31  | 4.55  | 4.09E-02 | -14.57 | 6.95  | 3.59E-02 | -2.05  | 12.12 | 8.66E-01 | -7.41  | 11.69 | 5.26E-01 | -5.89  | 8.63  | 4.95E-01 |
| cg25317585 | 14.76  | 7.22  | 4.09E-02 | 13.80  | 22.66 | 5.43E-01 | 24.08  | 24.89 | 3.33E-01 | 15.51  | 9.58  | 1.05E-01 | 10.25  | 14.55 | 4.81E-01 |
| cg22007501 | -14.67 | 7.18  | 4.09E-02 | -6.68  | 19.68 | 7.34E-01 | -21.96 | 44.45 | 6.21E-01 | -13.85 | 8.03  | 8.47E-02 | -50.74 | 34.79 | 1.45E-01 |
| cg18502630 | 14.63  | 7.15  | 4.09E-02 | 4.48   | 11.70 | 7.02E-01 | 14.25  | 12.55 | 2.56E-01 | 30.78  | 18.56 | 9.73E-02 | 24.58  | 18.33 | 1.80E-01 |
| cg13095450 | -7.21  | 3.53  | 4.09E-02 | -6.92  | 4.83  | 1.52E-01 | -0.43  | 9.78  | 9.65E-01 | -15.93 | 9.18  | 8.28E-02 | -5.91  | 8.12  | 4.67E-01 |
| cg00731913 | -22.35 | 10.93 | 4.09E-02 | -31.87 | 32.55 | 3.28E-01 | -75.82 | 99.52 | 4.46E-01 | -20.13 | 12.19 | 9.86E-02 | -23.18 | 40.84 | 5.70E-01 |
| cg04916107 | 17.73  | 8.67  | 4.09E-02 | 25.73  | 12.15 | 3.41E-02 | 17.41  | 38.19 | 6.49E-01 | 8.00   | 42.73 | 8.52E-01 | 8.53   | 13.74 | 5.35E-01 |
| cg04441453 | 8.73   | 4.27  | 4.09E-02 | 9.36   | 7.52  | 2.13E-01 | -1.92  | 14.84 | 8.97E-01 | 11.19  | 6.40  | 8.03E-02 | 5.94   | 11.07 | 5.91E-01 |
| cg23018091 | 19.53  | 9.55  | 4.09E-02 | 15.42  | 11.90 | 1.95E-01 | 13.08  | 26.56 | 6.22E-01 | 55.25  | 51.00 | 2.79E-01 | 31.17  | 21.82 | 1.53E-01 |
| cg16291276 | 19.74  | 9.65  | 4.09E-02 | 16.58  | 12.99 | 2.02E-01 | -0.37  | 49.83 | 9.94E-01 | 24.94  | 44.29 | 5.73E-01 | 25.95  | 16.03 | 1.05E-01 |
| cg05534186 | 12.89  | 6.30  | 4.09E-02 | 14.25  | 10.12 | 1.59E-01 | 20.06  | 16.56 | 2.26E-01 | 18.50  | 16.31 | 2.57E-01 | 5.32   | 11.19 | 6.35E-01 |
| cg05539847 | 13.77  | 6.73  | 4.09E-02 | 3.63   | 10.23 | 7.23E-01 | 22.37  | 12.98 | 8.49E-02 | 10.49  | 19.35 | 5.88E-01 | 27.78  | 16.02 | 8.29E-02 |
| cg26851500 | -8.35  | 4.09  | 4.09E-02 | -20.92 | 11.27 | 6.34E-02 | 7.05   | 19.04 | 7.11E-01 | -7.34  | 4.83  | 1.28E-01 | -6.29  | 12.57 | 6.17E-01 |
| cg10221266 | 15.28  | 7.48  | 4.09E-02 | 6.05   | 15.81 | 7.02E-01 | -8.41  | 21.68 | 6.98E-01 | 22.07  | 9.99  | 2.71E-02 | 26.34  | 23.93 | 2.71E-01 |
| cg22837406 | 20.67  | 10.11 | 4.09E-02 | -7.90  | 25.18 | 7.54E-01 | 14.11  | 46.89 | 7.63E-01 | 27.30  | 12.43 | 2.80E-02 | 24.63  | 27.94 | 3.78E-01 |
| cg13163833 | 4.73   | 2.31  | 4.09E-02 | 3.17   | 3.27  | 3.32E-01 | 11.55  | 5.33  | 3.04E-02 | 5.55   | 11.48 | 6.29E-01 | 2.74   | 4.44  | 5.37E-01 |
| cg03392571 | 12.12  | 5.93  | 4.09E-02 | 2.71   | 7.12  | 7.04E-01 | 25.49  | 11.99 | 3.36E-02 | 25.43  | 17.50 | 1.46E-01 | 13.36  | 12.17 | 2.72E-01 |
| cg26114100 | 10.72  | 5.24  | 4.09E-02 | 3.55   | 7.13  | 6.19E-01 | 8.09   | 12.15 | 5.06E-01 | 29.28  | 12.58 | 1.99E-02 | 13.63  | 10.76 | 2.05E-01 |
| cg22984282 | -2.02  | 0.99  | 4.09E-02 | -1.41  | 1.42  | 3.22E-01 | -2.71  | 2.05  | 1.87E-01 | 0.47   | 2.73  | 8.64E-01 | -5.03  | 2.52  | 4.59E-02 |
| cg01189072 | -14.06 | 6.88  | 4.09E-02 | -16.93 | 9.56  | 7.64E-02 | 7.13   | 22.53 | 7.52E-01 | -16.79 | 15.89 | 2.91E-01 | -13.94 | 15.33 | 3.63E-01 |
| cg17028586 | -12.52 | 6.13  | 4.09E-02 | -16.22 | 11.77 | 1.68E-01 | 6.08   | 14.71 | 6.79E-01 | -13.19 | 9.26  | 1.54E-01 | -28.91 | 17.85 | 1.05E-01 |
| cg02833386 | 13.94  | 6.82  | 4.09E-02 | 13.18  | 20.77 | 5.26E-01 | 1.89   | 36.57 | 9.59E-01 | 16.42  | 7.65  | 3.17E-02 | -9.90  | 27.45 | 7.18E-01 |
| cg17257175 | 17.90  | 8.75  | 4.09E-02 | 10.56  | 18.37 | 5.65E-01 | 51.35  | 91.83 | 5.76E-01 | 24.82  | 10.73 | 2.07E-02 | -15.13 | 27.93 | 5.88E-01 |
| cg07797030 | 10.78  | 5.27  | 4.09E-02 | -1.14  | 11.65 | 9.22E-01 | 27.13  | 18.71 | 1.47E-01 | 13.56  | 6.95  | 5.09E-02 | 7.47   | 14.12 | 5.97E-01 |
| cg14416284 | 17.78  | 8.70  | 4.09E-02 | 0.19   | 26.00 | 9.94E-01 | 61.58  | 98.76 | 5.33E-01 | 19.84  | 9.63  | 3.94E-02 | 16.92  | 34.05 | 6.19E-01 |
| cg27359469 | -15.28 | 7.48  | 4.09E-02 | -23.88 | 14.63 | 1.03E-01 | -21.23 | 22.79 | 3.51E-01 | -9.92  | 10.52 | 3.46E-01 | -13.87 | 21.01 | 5.09E-01 |
| cg00808403 | 18.54  | 9.07  | 4.09E-02 | 14.16  | 11.93 | 2.35E-01 | 38.65  | 13.65 | 4.64E-03 | 22.86  | 13.98 | 1.02E-01 | -10.96 | 18.79 | 5.60E-01 |
| cg18093358 | 19.13  | 9.36  | 4.09E-02 | 12.19  | 16.16 | 4.51E-01 | 17.72  | 18.83 | 3.47E-01 | 13.19  | 18.38 | 4.73E-01 | 45.72  | 23.51 | 5.18E-02 |
| cg18265845 | -15.61 | 7.64  | 4.09E-02 | -7.52  | 14.97 | 6.16E-01 | -8.22  | 18.29 | 6.53E-01 | -18.77 | 12.63 | 1.37E-01 | -26.83 | 17.09 | 1.16E-01 |
| cg19975346 | 6.51   | 3.19  | 4.09E-02 | 5.52   | 4.05  | 1.73E-01 | 15.38  | 8.24  | 6.20E-02 | 4.80   | 9.68  | 6.20E-01 | 2.27   | 9.04  | 8.02E-01 |

|            |        |       |          |        |       |          |         |        |          |        |       |          |        |       |          |
|------------|--------|-------|----------|--------|-------|----------|---------|--------|----------|--------|-------|----------|--------|-------|----------|
| cg14434601 | -11.12 | 5.44  | 4.09E-02 | -31.52 | 16.35 | 5.39E-02 | -23.88  | 22.00  | 2.78E-01 | -6.59  | 6.22  | 2.90E-01 | -18.08 | 21.77 | 4.06E-01 |
| cg00840270 | -9.08  | 4.44  | 4.09E-02 | -8.21  | 5.30  | 1.22E-01 | -0.09   | 10.44  | 9.93E-01 | -31.51 | 13.94 | 2.38E-02 | -8.04  | 8.99  | 3.71E-01 |
| cg09601518 | 30.59  | 14.96 | 4.10E-02 | 31.15  | 20.01 | 1.20E-01 | 52.05   | 55.40  | 3.47E-01 | -20.59 | 65.30 | 7.53E-01 | 33.14  | 26.65 | 2.14E-01 |
| cg12088387 | 13.42  | 6.56  | 4.10E-02 | 10.03  | 11.14 | 3.68E-01 | 25.44   | 13.88  | 6.68E-02 | 30.91  | 18.60 | 9.66E-02 | 1.30   | 11.89 | 9.13E-01 |
| cg27647667 | -16.13 | 7.89  | 4.10E-02 | -31.42 | 22.48 | 1.62E-01 | 18.53   | 43.02  | 6.67E-01 | -18.06 | 8.98  | 4.42E-02 | 15.62  | 29.91 | 6.02E-01 |
| cg13159318 | -8.61  | 4.21  | 4.10E-02 | -4.19  | 8.82  | 6.35E-01 | 0.77    | 13.22  | 9.54E-01 | -9.81  | 5.53  | 7.62E-02 | -22.53 | 13.98 | 1.07E-01 |
| cg19863224 | -12.77 | 6.25  | 4.10E-02 | 0.91   | 20.82 | 9.65E-01 | 1.27    | 33.37  | 9.70E-01 | -13.06 | 6.85  | 5.66E-02 | -47.10 | 30.06 | 1.17E-01 |
| cg05362320 | -15.43 | 7.55  | 4.10E-02 | 0.38   | 21.85 | 9.86E-01 | 79.76   | 79.97  | 3.19E-01 | -20.28 | 8.49  | 1.69E-02 | -1.88  | 26.49 | 9.44E-01 |
| cg27517968 | -4.94  | 2.42  | 4.10E-02 | -3.43  | 3.27  | 2.95E-01 | -9.34   | 5.26   | 7.56E-02 | -11.72 | 8.31  | 1.58E-01 | -0.64  | 6.07  | 9.16E-01 |
| cg23589035 | 6.70   | 3.28  | 4.10E-02 | 4.76   | 4.22  | 2.60E-01 | 10.11   | 8.62   | 2.41E-01 | 21.65  | 13.43 | 1.07E-01 | 5.58   | 7.45  | 4.54E-01 |
| cg02771299 | 18.72  | 9.16  | 4.10E-02 | -1.14  | 18.07 | 9.50E-01 | 30.06   | 21.02  | 1.53E-01 | 15.97  | 9.02  | 7.68E-02 | 62.60  | 29.90 | 3.63E-02 |
| cg08976554 | 12.82  | 6.27  | 4.10E-02 | 10.93  | 6.89  | 1.13E-01 | 15.53   | 25.54  | 5.43E-01 | 11.88  | 23.38 | 6.11E-01 | 51.36  | 32.08 | 1.09E-01 |
| cg00216056 | 32.37  | 15.84 | 4.10E-02 | 35.32  | 18.44 | 5.54E-02 | 45.01   | 67.53  | 5.05E-01 | 104.92 | 69.50 | 1.31E-01 | -10.51 | 40.23 | 7.94E-01 |
| cg26844246 | 12.39  | 6.06  | 4.10E-02 | 26.38  | 10.10 | 8.98E-03 | 9.26    | 14.92  | 5.35E-01 | 13.18  | 11.03 | 2.32E-01 | -0.01  | 9.76  | 9.99E-01 |
| cg15199987 | -8.06  | 3.94  | 4.10E-02 | -3.62  | 9.78  | 7.11E-01 | -17.86  | 14.85  | 2.29E-01 | -8.13  | 5.22  | 1.20E-01 | -8.01  | 8.88  | 3.67E-01 |
| cg18648169 | 9.23   | 4.52  | 4.10E-02 | 13.60  | 6.45  | 3.52E-02 | 15.58   | 11.58  | 1.78E-01 | 4.74   | 12.02 | 6.94E-01 | -2.15  | 9.69  | 8.25E-01 |
| cg02243278 | -8.27  | 4.05  | 4.10E-02 | -4.46  | 11.97 | 7.10E-01 | -29.10  | 16.62  | 8.00E-02 | -7.57  | 4.84  | 1.18E-01 | -5.87  | 11.41 | 6.07E-01 |
| cg18251417 | -17.28 | 8.46  | 4.10E-02 | -29.85 | 15.81 | 5.90E-02 | -16.24  | 16.50  | 3.25E-01 | 0.52   | 15.72 | 9.74E-01 | -28.59 | 21.03 | 1.74E-01 |
| cg08790004 | 13.29  | 6.51  | 4.10E-02 | 18.90  | 17.72 | 2.86E-01 | 53.46   | 70.62  | 4.49E-01 | 11.99  | 7.27  | 9.89E-02 | 12.31  | 27.67 | 6.56E-01 |
| cg07616394 | 11.16  | 5.46  | 4.10E-02 | 13.30  | 6.92  | 5.45E-02 | 25.05   | 19.85  | 2.07E-01 | 11.81  | 27.72 | 6.70E-01 | 1.97   | 10.65 | 8.53E-01 |
| cg03958426 | 13.42  | 6.57  | 4.10E-02 | 16.90  | 9.31  | 6.93E-02 | 6.33    | 15.91  | 6.91E-01 | 28.36  | 24.36 | 2.44E-01 | 7.18   | 12.91 | 5.78E-01 |
| cg24073950 | 16.54  | 8.10  | 4.10E-02 | 14.22  | 12.63 | 2.60E-01 | 17.15   | 17.65  | 3.31E-01 | 18.99  | 18.95 | 3.16E-01 | 18.48  | 18.28 | 3.12E-01 |
| cg18660278 | 7.52   | 3.68  | 4.10E-02 | 6.22   | 4.83  | 1.98E-01 | 1.21    | 8.28   | 8.84E-01 | 24.80  | 10.89 | 2.28E-02 | 7.16   | 8.18  | 3.81E-01 |
| cg20667230 | 41.03  | 20.08 | 4.10E-02 | 48.00  | 23.01 | 3.69E-02 | -66.24  | 128.21 | 6.05E-01 | 104.08 | 56.24 | 6.42E-02 | -2.82  | 41.71 | 9.46E-01 |
| cg14419424 | 6.48   | 3.17  | 4.10E-02 | 7.16   | 4.43  | 1.06E-01 | 0.68    | 8.86   | 9.39E-01 | 13.16  | 9.51  | 1.66E-01 | 5.06   | 6.36  | 4.27E-01 |
| cg05210804 | 5.86   | 2.87  | 4.10E-02 | 2.54   | 4.34  | 5.58E-01 | 11.43   | 5.54   | 3.92E-02 | 8.73   | 8.98  | 3.31E-01 | 4.12   | 6.51  | 5.26E-01 |
| cg22821908 | 14.04  | 6.87  | 4.10E-02 | 14.74  | 12.39 | 2.34E-01 | 36.83   | 42.62  | 3.87E-01 | 11.45  | 9.28  | 2.17E-01 | 19.33  | 20.09 | 3.36E-01 |
| cg06235429 | 13.87  | 6.79  | 4.10E-02 | 28.11  | 8.80  | 1.40E-03 | 4.73    | 12.90  | 7.14E-01 | 3.64   | 12.00 | 7.61E-01 | 8.29   | 15.70 | 5.97E-01 |
| cg24740195 | 22.72  | 11.12 | 4.10E-02 | -0.08  | 34.23 | 9.98E-01 | -109.66 | 133.12 | 4.10E-01 | 28.75  | 12.22 | 1.86E-02 | -5.34  | 45.69 | 9.07E-01 |
| cg16754788 | 17.93  | 8.78  | 4.11E-02 | 11.99  | 17.74 | 4.99E-01 | 38.27   | 28.33  | 1.77E-01 | 13.59  | 12.26 | 2.68E-01 | 29.73  | 22.93 | 1.95E-01 |
| cg05720937 | -33.39 | 16.34 | 4.11E-02 | -41.07 | 21.44 | 5.54E-02 | -41.05  | 42.00  | 3.28E-01 | -4.45  | 64.93 | 9.45E-01 | -14.84 | 36.15 | 6.81E-01 |
| cg19589800 | -6.66  | 3.26  | 4.11E-02 | -4.49  | 5.54  | 4.17E-01 | -5.16   | 8.06   | 5.22E-01 | -10.37 | 5.42  | 5.56E-02 | -3.94  | 9.13  | 6.66E-01 |
| cg02534164 | -7.51  | 3.68  | 4.11E-02 | -18.14 | 8.75  | 3.82E-02 | -9.67   | 14.31  | 4.99E-01 | -4.72  | 4.54  | 2.98E-01 | -5.64  | 11.51 | 6.24E-01 |
| cg16782084 | -12.04 | 5.89  | 4.11E-02 | -10.05 | 9.32  | 2.81E-01 | -13.32  | 15.28  | 3.83E-01 | -3.47  | 11.94 | 7.71E-01 | -25.02 | 12.94 | 5.31E-02 |
| cg21115516 | -15.64 | 7.66  | 4.11E-02 | -3.91  | 17.62 | 8.24E-01 | -50.41  | 60.05  | 4.01E-01 | -18.17 | 9.30  | 5.07E-02 | -15.07 | 22.37 | 5.01E-01 |

|            |        |       |          |        |       |          |         |        |          |        |       |          |        |       |          |
|------------|--------|-------|----------|--------|-------|----------|---------|--------|----------|--------|-------|----------|--------|-------|----------|
| cg23054437 | 13.86  | 6.78  | 4.11E-02 | 16.18  | 8.32  | 5.20E-02 | 19.53   | 27.45  | 4.77E-01 | 7.15   | 25.52 | 7.79E-01 | 6.94   | 15.03 | 6.44E-01 |
| cg13770903 | 19.50  | 9.55  | 4.11E-02 | 39.34  | 20.66 | 5.69E-02 | 35.57   | 21.99  | 1.06E-01 | 5.08   | 13.44 | 7.05E-01 | 19.65  | 31.25 | 5.30E-01 |
| cg00147248 | -14.86 | 7.27  | 4.11E-02 | -11.20 | 13.71 | 4.14E-01 | -6.39   | 24.52  | 7.94E-01 | -9.86  | 7.29  | 1.76E-01 | -47.85 | 19.03 | 1.19E-02 |
| cg03333188 | 11.05  | 5.41  | 4.11E-02 | -4.42  | 18.61 | 8.12E-01 | 7.31    | 25.14  | 7.71E-01 | 12.44  | 6.00  | 3.81E-02 | 17.16  | 22.67 | 4.49E-01 |
| cg08536617 | -12.72 | 6.23  | 4.11E-02 | -26.78 | 9.15  | 3.42E-03 | -10.63  | 20.55  | 6.05E-01 | -4.20  | 5.14  | 4.13E-01 | -14.15 | 12.67 | 2.64E-01 |
| cg03217729 | 12.05  | 5.90  | 4.11E-02 | 18.45  | 9.32  | 4.77E-02 | 16.18   | 17.65  | 3.59E-01 | 14.78  | 11.19 | 1.87E-01 | -5.98  | 12.87 | 6.42E-01 |
| cg00924855 | -12.97 | 6.35  | 4.11E-02 | -28.56 | 12.26 | 1.98E-02 | 8.00    | 18.34  | 6.63E-01 | -9.24  | 8.12  | 2.55E-01 | -17.34 | 18.72 | 3.54E-01 |
| cg12050175 | -8.56  | 4.19  | 4.11E-02 | -10.58 | 6.29  | 9.27E-02 | -20.17  | 10.07  | 4.51E-02 | 4.37   | 10.46 | 6.76E-01 | -5.52  | 8.12  | 4.97E-01 |
| cg01699630 | 4.52   | 2.22  | 4.11E-02 | 3.76   | 2.97  | 2.05E-01 | 10.05   | 5.82   | 8.43E-02 | 4.14   | 5.01  | 4.09E-01 | 1.62   | 6.91  | 8.15E-01 |
| cg18700744 | -8.36  | 4.09  | 4.11E-02 | -7.55  | 6.59  | 2.52E-01 | -8.85   | 8.81   | 3.15E-01 | -8.82  | 9.52  | 3.54E-01 | -8.93  | 8.86  | 3.13E-01 |
| cg18190417 | -16.35 | 8.00  | 4.11E-02 | -16.68 | 10.79 | 1.22E-01 | -1.52   | 21.10  | 9.42E-01 | -27.76 | 25.19 | 2.71E-01 | -20.23 | 17.66 | 2.52E-01 |
| cg01295539 | -11.10 | 5.44  | 4.11E-02 | -15.88 | 8.47  | 6.09E-02 | -7.83   | 12.74  | 5.39E-01 | -3.02  | 14.95 | 8.40E-01 | -10.01 | 10.39 | 3.35E-01 |
| cg11336382 | -4.41  | 2.16  | 4.11E-02 | -2.52  | 3.06  | 4.10E-01 | -1.32   | 5.15   | 7.98E-01 | -12.01 | 6.12  | 4.96E-02 | -7.12  | 4.83  | 1.40E-01 |
| cg21485122 | 16.73  | 8.19  | 4.11E-02 | 38.16  | 15.40 | 1.32E-02 | 25.58   | 28.43  | 3.68E-01 | 12.35  | 7.49  | 9.94E-02 | -10.24 | 23.41 | 6.62E-01 |
| cg25201255 | -10.58 | 5.18  | 4.11E-02 | -9.07  | 9.10  | 3.19E-01 | -3.11   | 13.40  | 8.17E-01 | -18.26 | 8.53  | 3.23E-02 | -2.80  | 13.03 | 8.30E-01 |
| cg10615519 | 16.19  | 7.93  | 4.11E-02 | -5.55  | 26.51 | 8.34E-01 | -17.25  | 36.02  | 6.32E-01 | 20.68  | 9.08  | 2.27E-02 | 17.60  | 25.11 | 4.83E-01 |
| cg06777812 | 17.20  | 8.42  | 4.11E-02 | -1.64  | 8.76  | 8.51E-01 | 15.32   | 11.50  | 1.83E-01 | 33.45  | 11.02 | 2.41E-03 | 26.21  | 12.68 | 3.87E-02 |
| cg07457727 | -10.98 | 5.37  | 4.11E-02 | -7.92  | 12.39 | 5.23E-01 | -32.12  | 19.82  | 1.05E-01 | -8.71  | 6.70  | 1.94E-01 | -16.03 | 17.40 | 3.57E-01 |
| cg17751366 | 23.99  | 11.75 | 4.11E-02 | 44.79  | 15.30 | 3.41E-03 | 15.33   | 20.91  | 4.63E-01 | -16.62 | 33.56 | 6.20E-01 | 15.00  | 23.72 | 5.27E-01 |
| cg01710580 | 24.30  | 11.90 | 4.11E-02 | 26.26  | 17.02 | 1.23E-01 | 53.02   | 24.45  | 3.01E-02 | -15.14 | 27.58 | 5.83E-01 | 23.76  | 23.19 | 3.06E-01 |
| cg06624310 | 23.66  | 11.58 | 4.11E-02 | 15.91  | 15.80 | 3.14E-01 | 28.68   | 31.91  | 3.69E-01 | 40.45  | 31.64 | 2.01E-01 | 30.05  | 26.14 | 2.50E-01 |
| cg18450420 | 4.83   | 2.36  | 4.11E-02 | 2.81   | 3.92  | 4.73E-01 | 9.26    | 4.68   | 4.79E-02 | 6.86   | 4.28  | 1.09E-01 | -4.54  | 7.21  | 5.29E-01 |
| cg00810187 | 28.03  | 13.73 | 4.11E-02 | 35.32  | 32.64 | 2.79E-01 | -16.62  | 109.49 | 8.79E-01 | 30.83  | 16.22 | 5.73E-02 | -0.34  | 45.45 | 9.94E-01 |
| cg26568226 | -11.23 | 5.50  | 4.11E-02 | -15.02 | 7.41  | 4.28E-02 | -3.64   | 14.60  | 8.03E-01 | -9.87  | 16.41 | 5.47E-01 | -6.87  | 12.46 | 5.81E-01 |
| cg23829102 | 8.17   | 4.00  | 4.11E-02 | 6.83   | 4.96  | 1.69E-01 | 14.35   | 11.81  | 2.24E-01 | 4.06   | 16.48 | 8.06E-01 | 10.45  | 9.52  | 2.73E-01 |
| cg17212420 | 19.34  | 9.47  | 4.11E-02 | 28.58  | 16.69 | 8.69E-02 | 16.87   | 20.35  | 4.07E-01 | 14.58  | 17.51 | 4.05E-01 | 13.16  | 23.05 | 5.68E-01 |
| cg04581753 | 16.59  | 8.13  | 4.11E-02 | 28.82  | 30.73 | 3.48E-01 | 50.53   | 133.50 | 7.05E-01 | 17.38  | 8.67  | 4.51E-02 | -17.55 | 36.75 | 6.33E-01 |
| cg16380885 | -12.75 | 6.24  | 4.11E-02 | -19.08 | 10.18 | 6.11E-02 | -10.37  | 15.10  | 4.92E-01 | -8.45  | 10.89 | 4.38E-01 | -8.28  | 17.69 | 6.39E-01 |
| cg12203394 | 31.31  | 15.33 | 4.11E-02 | 24.64  | 20.91 | 2.39E-01 | 30.52   | 40.05  | 4.46E-01 | 65.04  | 64.80 | 3.16E-01 | 38.29  | 30.07 | 2.03E-01 |
| cg25311666 | 13.38  | 6.55  | 4.11E-02 | 25.99  | 11.09 | 1.91E-02 | -2.92   | 15.95  | 8.55E-01 | 11.32  | 12.37 | 3.60E-01 | 8.06   | 14.59 | 5.81E-01 |
| cg16637776 | 15.97  | 7.82  | 4.11E-02 | 28.96  | 17.85 | 1.05E-01 | -30.56  | 53.49  | 5.68E-01 | 10.64  | 9.58  | 2.67E-01 | 32.96  | 22.52 | 1.43E-01 |
| cg01342411 | 108.04 | 52.91 | 4.11E-02 | 33.77  | 43.30 | 4.35E-01 | 394.46  | 150.13 | 8.60E-03 | 140.07 | 87.52 | 1.09E-01 | 85.02  | 64.88 | 1.90E-01 |
| cg17127050 | -33.56 | 16.44 | 4.11E-02 | -2.68  | 63.91 | 9.67E-01 | -274.66 | 273.27 | 3.15E-01 | -36.66 | 17.61 | 3.73E-02 | -7.60  | 67.66 | 9.11E-01 |
| cg01832218 | 15.63  | 7.65  | 4.11E-02 | 17.39  | 20.43 | 3.95E-01 | 39.79   | 20.32  | 5.02E-02 | 10.84  | 9.64  | 2.61E-01 | 8.10   | 25.79 | 7.53E-01 |
| cg04674428 | -11.94 | 5.85  | 4.11E-02 | -23.23 | 14.52 | 1.10E-01 | 11.47   | 30.42  | 7.06E-01 | -11.70 | 6.90  | 8.97E-02 | -2.23  | 20.43 | 9.13E-01 |



|            |        |       |          |        |       |          |         |        |          |        |       |          |         |       |          |
|------------|--------|-------|----------|--------|-------|----------|---------|--------|----------|--------|-------|----------|---------|-------|----------|
| cg01349655 | -8.74  | 4.28  | 4.12E-02 | -7.85  | 8.49  | 3.55E-01 | -2.37   | 13.18  | 8.57E-01 | -11.00 | 5.96  | 6.50E-02 | -6.62   | 12.14 | 5.85E-01 |
| cg16777620 | 26.57  | 13.01 | 4.12E-02 | 13.94  | 33.06 | 6.73E-01 | -40.27  | 93.17  | 6.66E-01 | 27.85  | 15.19 | 6.68E-02 | 51.84   | 42.91 | 2.27E-01 |
| cg09597390 | -8.04  | 3.94  | 4.12E-02 | -8.69  | 8.30  | 2.95E-01 | 3.62    | 10.54  | 7.31E-01 | -9.10  | 5.40  | 9.18E-02 | -16.90  | 12.24 | 1.67E-01 |
| cg27251412 | 8.24   | 4.03  | 4.12E-02 | 6.48   | 5.59  | 2.47E-01 | 8.50    | 12.11  | 4.83E-01 | 7.01   | 9.24  | 4.48E-01 | 14.49   | 9.54  | 1.29E-01 |
| cg19304093 | -9.34  | 4.57  | 4.12E-02 | -28.36 | 13.64 | 3.76E-02 | 3.53    | 20.94  | 8.66E-01 | -6.25  | 5.39  | 2.46E-01 | -15.15  | 13.20 | 2.51E-01 |
| cg26032417 | -47.54 | 23.28 | 4.12E-02 | -21.53 | 26.87 | 4.23E-01 | 21.66   | 73.00  | 7.67E-01 | -74.73 | 46.85 | 1.11E-01 | -100.81 | 42.24 | 1.70E-02 |
| cg11701055 | -37.97 | 18.60 | 4.12E-02 | -48.09 | 56.53 | 3.95E-01 | -342.41 | 308.70 | 2.67E-01 | -29.26 | 20.63 | 1.56E-01 | -102.26 | 67.52 | 1.30E-01 |
| cg00619263 | -9.03  | 4.42  | 4.12E-02 | -11.22 | 7.04  | 1.11E-01 | -1.06   | 9.65   | 9.13E-01 | -5.46  | 9.30  | 5.57E-01 | -18.70  | 10.80 | 8.35E-02 |
| cg00110039 | -13.08 | 6.41  | 4.12E-02 | -10.06 | 12.58 | 4.24E-01 | -2.31   | 24.17  | 9.24E-01 | -14.71 | 8.54  | 8.50E-02 | -18.93  | 19.57 | 3.33E-01 |
| cg12995645 | 18.13  | 8.88  | 4.12E-02 | 18.28  | 17.50 | 2.96E-01 | 4.31    | 15.77  | 7.84E-01 | 19.55  | 16.44 | 2.34E-01 | 47.43   | 24.26 | 5.06E-02 |
| cg24335280 | 21.34  | 10.45 | 4.12E-02 | 41.89  | 20.06 | 3.68E-02 | 18.33   | 25.22  | 4.67E-01 | 8.07   | 8.75  | 3.56E-01 | 53.50   | 30.23 | 7.68E-02 |
| cg09253473 | 9.27   | 4.54  | 4.12E-02 | 8.18   | 6.20  | 1.87E-01 | 12.80   | 9.85   | 1.94E-01 | 4.54   | 16.81 | 7.87E-01 | 10.27   | 10.76 | 3.40E-01 |
| cg05577957 | 19.67  | 9.63  | 4.12E-02 | 14.67  | 15.52 | 3.44E-01 | 15.95   | 16.91  | 3.46E-01 | 30.03  | 25.05 | 2.31E-01 | 30.92   | 25.55 | 2.26E-01 |
| cg08491437 | -8.89  | 4.36  | 4.12E-02 | -17.68 | 7.28  | 1.52E-02 | -1.74   | 10.32  | 8.66E-01 | -1.36  | 8.94  | 8.79E-01 | -8.52   | 9.14  | 3.52E-01 |
| cg08085929 | 22.01  | 10.78 | 4.12E-02 | 12.39  | 20.59 | 5.48E-01 | 8.63    | 21.24  | 6.84E-01 | 27.25  | 18.53 | 1.41E-01 | 55.16   | 29.90 | 6.51E-02 |
| cg09485853 | 7.24   | 3.55  | 4.12E-02 | 8.03   | 4.50  | 7.47E-02 | 19.38   | 10.60  | 6.75E-02 | 5.87   | 10.43 | 5.73E-01 | -3.86   | 9.09  | 6.71E-01 |
| cg18297196 | 7.83   | 3.83  | 4.12E-02 | 10.63  | 5.66  | 6.03E-02 | 18.48   | 10.11  | 6.76E-02 | 0.06   | 11.76 | 9.96E-01 | 0.98    | 7.11  | 8.90E-01 |
| cg10811945 | -11.17 | 5.47  | 4.12E-02 | -14.92 | 8.67  | 8.53E-02 | -3.16   | 11.85  | 7.89E-01 | -0.42  | 15.93 | 9.79E-01 | -16.67  | 10.53 | 1.13E-01 |
| cg21145248 | -7.26  | 3.56  | 4.12E-02 | -7.56  | 5.95  | 2.04E-01 | -11.77  | 11.10  | 2.89E-01 | -2.13  | 5.79  | 7.13E-01 | -15.76  | 8.86  | 7.51E-02 |
| cg26980729 | -7.02  | 3.44  | 4.12E-02 | -9.59  | 6.69  | 1.52E-01 | -7.75   | 12.19  | 5.25E-01 | -6.38  | 4.84  | 1.87E-01 | -4.25   | 8.85  | 6.31E-01 |
| cg02980235 | 5.79   | 2.84  | 4.12E-02 | 5.72   | 4.69  | 2.23E-01 | 7.86    | 7.75   | 3.10E-01 | 5.07   | 4.38  | 2.47E-01 | 6.40    | 9.93  | 5.19E-01 |
| cg00987699 | 8.30   | 4.07  | 4.12E-02 | 13.98  | 7.64  | 6.74E-02 | -3.08   | 7.17   | 6.68E-01 | 8.97   | 7.23  | 2.15E-01 | 14.03   | 7.27  | 5.36E-02 |
| cg07599133 | 16.98  | 8.32  | 4.12E-02 | 11.09  | 20.80 | 5.94E-01 | 46.38   | 41.05  | 2.59E-01 | 15.79  | 12.23 | 1.97E-01 | 17.81   | 14.33 | 2.14E-01 |
| cg01130611 | -11.38 | 5.58  | 4.12E-02 | -14.26 | 11.34 | 2.09E-01 | -14.01  | 27.36  | 6.09E-01 | -11.70 | 6.97  | 9.31E-02 | 1.82    | 20.15 | 9.28E-01 |
| cg09244436 | 10.50  | 5.14  | 4.12E-02 | 22.85  | 10.84 | 3.50E-02 | -1.38   | 18.66  | 9.41E-01 | 6.66   | 6.62  | 3.14E-01 | 15.00   | 16.61 | 3.66E-01 |
| cg00679877 | -13.85 | 6.79  | 4.12E-02 | -19.37 | 10.62 | 6.82E-02 | 1.72    | 14.91  | 9.08E-01 | -3.20  | 17.86 | 8.58E-01 | -24.33  | 13.85 | 7.91E-02 |
| cg13440795 | -8.51  | 4.17  | 4.12E-02 | -7.30  | 8.29  | 3.78E-01 | -16.75  | 15.57  | 2.82E-01 | -9.08  | 5.63  | 1.07E-01 | -3.83   | 11.63 | 7.42E-01 |
| cg02095504 | -7.66  | 3.75  | 4.12E-02 | -7.82  | 7.12  | 2.72E-01 | -16.93  | 11.15  | 1.29E-01 | -7.01  | 5.75  | 2.23E-01 | -3.18   | 8.79  | 7.17E-01 |
| cg03481035 | -8.93  | 4.37  | 4.12E-02 | -11.58 | 8.88  | 1.93E-01 | 12.40   | 15.88  | 4.35E-01 | -11.81 | 5.99  | 4.86E-02 | -5.13   | 11.36 | 6.51E-01 |
| cg15556943 | 21.55  | 10.56 | 4.12E-02 | 33.50  | 13.58 | 1.36E-02 | 38.80   | 28.21  | 1.69E-01 | 13.22  | 39.35 | 7.37E-01 | -4.99   | 18.57 | 7.88E-01 |
| cg17632405 | -31.28 | 15.33 | 4.12E-02 | -57.77 | 50.81 | 2.55E-01 | -15.95  | 197.02 | 9.35E-01 | -25.55 | 16.93 | 1.31E-01 | -59.55  | 52.89 | 2.60E-01 |
| cg03902718 | -18.24 | 8.94  | 4.13E-02 | -17.18 | 13.36 | 1.98E-01 | 6.14    | 17.03  | 7.18E-01 | -19.12 | 12.63 | 1.30E-01 | -45.21  | 18.11 | 1.25E-02 |
| cg08140412 | -9.90  | 4.85  | 4.13E-02 | -11.09 | 7.38  | 1.33E-01 | -10.44  | 13.73  | 4.47E-01 | -0.83  | 10.84 | 9.39E-01 | -14.99  | 9.84  | 1.27E-01 |
| cg09131629 | -26.50 | 12.98 | 4.13E-02 | -47.47 | 39.34 | 2.28E-01 | -158.92 | 161.76 | 3.26E-01 | -21.89 | 14.35 | 1.27E-01 | -36.12  | 50.62 | 4.75E-01 |
| cg19117051 | 19.33  | 9.47  | 4.13E-02 | 31.38  | 16.55 | 5.79E-02 | 12.51   | 16.97  | 4.61E-01 | 11.48  | 20.65 | 5.78E-01 | 18.17   | 24.39 | 4.56E-01 |

|            |        |       |          |        |       |          |        |        |          |         |       |          |        |       |          |
|------------|--------|-------|----------|--------|-------|----------|--------|--------|----------|---------|-------|----------|--------|-------|----------|
| cg09862711 | -7.29  | 3.57  | 4.13E-02 | -6.24  | 5.49  | 2.56E-01 | -6.18  | 8.27   | 4.55E-01 | -13.51  | 7.85  | 8.51E-02 | -3.80  | 8.36  | 6.50E-01 |
| cg19094673 | -19.03 | 9.32  | 4.13E-02 | -19.28 | 17.77 | 2.78E-01 | -38.48 | 50.79  | 4.49E-01 | -16.68  | 12.20 | 1.72E-01 | -25.01 | 28.44 | 3.79E-01 |
| cg10673307 | -13.51 | 6.62  | 4.13E-02 | -13.48 | 19.98 | 5.00E-01 | -41.62 | 22.92  | 6.93E-02 | -9.70   | 7.69  | 2.07E-01 | -20.87 | 25.86 | 4.20E-01 |
| cg12231713 | -13.38 | 6.56  | 4.13E-02 | -21.81 | 12.84 | 8.93E-02 | 6.99   | 16.21  | 6.66E-01 | -9.55   | 11.24 | 3.95E-01 | -23.75 | 13.52 | 7.90E-02 |
| cg16851771 | -30.42 | 14.90 | 4.13E-02 | -35.97 | 18.37 | 5.03E-02 | 16.53  | 59.31  | 7.80E-01 | -9.46   | 59.23 | 8.73E-01 | -33.38 | 32.12 | 2.99E-01 |
| cg07392085 | 14.16  | 6.94  | 4.13E-02 | 8.25   | 9.16  | 3.67E-01 | 44.67  | 29.66  | 1.32E-01 | 32.85   | 30.29 | 2.78E-01 | 16.51  | 12.31 | 1.80E-01 |
| cg23978968 | -10.51 | 5.15  | 4.13E-02 | -14.84 | 5.81  | 1.06E-02 | -22.07 | 10.67  | 3.86E-02 | 5.64    | 10.19 | 5.80E-01 | -7.53  | 9.14  | 4.10E-01 |
| cg10159032 | 16.91  | 8.29  | 4.13E-02 | 12.75  | 16.19 | 4.31E-01 | 38.85  | 21.53  | 7.12E-02 | 7.72    | 11.81 | 5.14E-01 | 40.94  | 26.44 | 1.22E-01 |
| cg09234518 | 24.36  | 11.94 | 4.13E-02 | 72.59  | 34.01 | 3.28E-02 | -2.64  | 42.71  | 9.51E-01 | 21.84   | 14.91 | 1.43E-01 | 10.32  | 29.99 | 7.31E-01 |
| cg12332174 | -25.02 | 12.26 | 4.13E-02 | -15.68 | 13.00 | 2.28E-01 | -13.07 | 33.35  | 6.95E-01 | -88.35  | 39.39 | 2.49E-02 | -34.41 | 29.74 | 2.47E-01 |
| cg14935343 | 27.43  | 13.44 | 4.13E-02 | 30.83  | 17.14 | 7.20E-02 | 21.53  | 40.65  | 5.96E-01 | -7.42   | 52.06 | 8.87E-01 | 31.63  | 29.44 | 2.83E-01 |
| cg16766249 | 12.90  | 6.32  | 4.13E-02 | 25.43  | 9.80  | 9.48E-03 | 4.84   | 14.69  | 7.42E-01 | 15.02   | 13.56 | 2.68E-01 | -0.64  | 11.73 | 9.56E-01 |
| cg03758523 | 20.48  | 10.04 | 4.13E-02 | 21.85  | 19.00 | 2.50E-01 | -14.75 | 54.99  | 7.89E-01 | 23.15   | 12.94 | 7.36E-02 | 11.02  | 34.20 | 7.47E-01 |
| cg04177132 | 8.96   | 4.39  | 4.13E-02 | 13.20  | 6.55  | 4.38E-02 | -0.60  | 10.78  | 9.56E-01 | 13.36   | 9.32  | 1.52E-01 | 0.94   | 10.92 | 9.31E-01 |
| cg24148361 | -11.40 | 5.59  | 4.13E-02 | -12.80 | 7.88  | 1.04E-01 | -6.89  | 14.14  | 6.26E-01 | -23.79  | 17.65 | 1.78E-01 | -6.25  | 11.38 | 5.83E-01 |
| cg10347032 | 10.12  | 4.96  | 4.13E-02 | 15.14  | 8.41  | 7.19E-02 | 19.64  | 12.21  | 1.08E-01 | 5.45    | 10.70 | 6.11E-01 | 1.63   | 9.50  | 8.64E-01 |
| cg04973788 | -26.54 | 13.01 | 4.13E-02 | -20.40 | 15.94 | 2.01E-01 | 39.12  | 55.94  | 4.84E-01 | -44.45  | 69.37 | 5.22E-01 | -55.22 | 26.31 | 3.58E-02 |
| cg06719212 | -15.98 | 7.83  | 4.13E-02 | -37.64 | 20.48 | 6.61E-02 | 21.31  | 38.39  | 5.79E-01 | -12.71  | 9.06  | 1.61E-01 | -28.46 | 30.53 | 3.51E-01 |
| cg01471232 | 12.09  | 5.93  | 4.13E-02 | 15.17  | 10.28 | 1.40E-01 | 19.24  | 14.20  | 1.76E-01 | 12.39   | 11.14 | 2.66E-01 | 0.91   | 12.93 | 9.44E-01 |
| cg05999189 | -8.38  | 4.11  | 4.13E-02 | -8.16  | 7.19  | 2.57E-01 | 5.24   | 11.93  | 6.60E-01 | -11.15  | 6.38  | 8.06E-02 | -12.21 | 10.95 | 2.65E-01 |
| cg11261655 | 14.05  | 6.89  | 4.13E-02 | 17.30  | 22.23 | 4.36E-01 | 44.68  | 39.46  | 2.58E-01 | 10.68   | 7.56  | 1.58E-01 | 49.40  | 32.87 | 1.33E-01 |
| cg15055062 | 15.22  | 7.46  | 4.13E-02 | 32.88  | 14.58 | 2.41E-02 | -2.21  | 18.47  | 9.05E-01 | 14.04   | 11.54 | 2.24E-01 | 7.04   | 18.83 | 7.08E-01 |
| cg00226580 | -7.28  | 3.57  | 4.13E-02 | -6.85  | 7.47  | 3.60E-01 | -3.20  | 11.12  | 7.73E-01 | -9.07   | 4.81  | 5.92E-02 | -3.34  | 10.36 | 7.48E-01 |
| cg20720697 | 17.82  | 8.74  | 4.13E-02 | 17.41  | 15.69 | 2.67E-01 | 22.55  | 17.42  | 1.95E-01 | 68.51   | 34.88 | 4.95E-02 | 6.52   | 14.25 | 6.47E-01 |
| cg18287066 | -7.16  | 3.51  | 4.13E-02 | -4.20  | 6.93  | 5.44E-01 | 3.62   | 8.98   | 6.87E-01 | -12.25  | 5.21  | 1.86E-02 | -7.79  | 9.48  | 4.11E-01 |
| cg00364445 | -14.82 | 7.27  | 4.14E-02 | 10.89  | 19.04 | 5.67E-01 | -1.77  | 42.74  | 9.67E-01 | -17.77  | 8.52  | 3.71E-02 | -34.84 | 23.10 | 1.32E-01 |
| cg00097639 | -15.42 | 7.56  | 4.14E-02 | 5.86   | 15.73 | 7.09E-01 | -24.88 | 23.89  | 2.98E-01 | -22.07  | 9.78  | 2.40E-02 | -15.34 | 28.45 | 5.90E-01 |
| cg24044564 | 27.93  | 13.70 | 4.14E-02 | 40.94  | 16.46 | 1.29E-02 | -0.12  | 17.50  | 9.94E-01 | 36.23   | 43.38 | 4.04E-01 | 58.83  | 33.15 | 7.60E-02 |
| cg07340473 | -29.95 | 14.68 | 4.14E-02 | -33.40 | 17.42 | 5.51E-02 | -0.70  | 72.43  | 9.92E-01 | -133.33 | 73.03 | 6.79E-02 | -3.82  | 32.22 | 9.06E-01 |
| cg24072599 | 55.55  | 27.23 | 4.14E-02 | 46.77  | 26.50 | 7.75E-02 | 120.32 | 110.41 | 2.76E-01 | 134.07  | 52.06 | 1.00E-02 | 3.41   | 38.87 | 9.30E-01 |
| cg17686936 | 22.87  | 11.22 | 4.14E-02 | 22.06  | 13.90 | 1.12E-01 | 21.20  | 30.79  | 4.91E-01 | 79.15   | 54.49 | 1.46E-01 | 13.50  | 26.91 | 6.16E-01 |
| cg16680438 | 7.47   | 3.66  | 4.14E-02 | 2.75   | 7.03  | 6.96E-01 | 31.06  | 18.99  | 1.02E-01 | 7.12    | 4.85  | 1.42E-01 | 12.53  | 10.58 | 2.36E-01 |
| cg02157467 | 17.90  | 8.77  | 4.14E-02 | 21.50  | 10.03 | 3.21E-02 | 27.76  | 18.25  | 1.28E-01 | 36.71   | 18.05 | 4.20E-02 | -4.98  | 12.94 | 7.00E-01 |
| cg22538712 | 8.56   | 4.19  | 4.14E-02 | 9.40   | 8.50  | 2.69E-01 | 11.30  | 10.87  | 2.99E-01 | 8.82    | 6.29  | 1.61E-01 | 4.04   | 10.40 | 6.97E-01 |
| cg13593548 | -14.65 | 7.18  | 4.14E-02 | -10.21 | 19.49 | 6.00E-01 | -12.13 | 42.68  | 7.76E-01 | -13.60  | 8.16  | 9.56E-02 | -39.25 | 29.19 | 1.79E-01 |

|            |        |       |          |        |       |          |         |        |          |        |       |          |        |       |          |
|------------|--------|-------|----------|--------|-------|----------|---------|--------|----------|--------|-------|----------|--------|-------|----------|
| cg11618704 | -21.13 | 10.36 | 4.14E-02 | -14.83 | 13.78 | 2.82E-01 | -219.88 | 127.81 | 8.54E-02 | -31.86 | 20.39 | 1.18E-01 | -18.09 | 25.13 | 4.72E-01 |
| cg08002981 | -17.30 | 8.48  | 4.14E-02 | -20.31 | 16.55 | 2.20E-01 | -5.83   | 22.74  | 7.97E-01 | -20.38 | 12.79 | 1.11E-01 | -13.82 | 21.31 | 5.17E-01 |
| cg15971157 | -7.55  | 3.70  | 4.14E-02 | -9.04  | 5.21  | 8.25E-02 | 1.45    | 8.21   | 8.60E-01 | -9.98  | 13.38 | 4.56E-01 | -11.75 | 8.01  | 1.43E-01 |
| cg03443331 | 13.94  | 6.84  | 4.14E-02 | 9.26   | 8.89  | 2.98E-01 | 21.64   | 13.22  | 1.02E-01 | 35.85  | 16.30 | 2.78E-02 | -1.30  | 13.71 | 9.24E-01 |
| cg12820134 | -9.13  | 4.47  | 4.14E-02 | -5.29  | 11.52 | 6.46E-01 | 15.61   | 17.45  | 3.71E-01 | -11.69 | 5.36  | 2.92E-02 | -13.89 | 15.14 | 3.59E-01 |
| cg15116677 | 95.11  | 46.64 | 4.14E-02 | 91.94  | 70.21 | 1.90E-01 | 59.27   | 193.49 | 7.59E-01 | 158.44 | 99.65 | 1.12E-01 | 58.22  | 87.87 | 5.08E-01 |
| cg21323106 | 14.57  | 7.14  | 4.14E-02 | -7.67  | 17.12 | 6.54E-01 | 15.31   | 33.53  | 6.48E-01 | 21.56  | 8.66  | 1.28E-02 | 5.31   | 22.61 | 8.14E-01 |
| cg05769889 | 13.02  | 6.39  | 4.14E-02 | 5.46   | 19.11 | 7.75E-01 | 62.89   | 44.99  | 1.62E-01 | 13.00  | 7.53  | 8.43E-02 | 12.06  | 16.53 | 4.66E-01 |
| cg27353143 | 11.93  | 5.85  | 4.14E-02 | 25.05  | 9.45  | 8.01E-03 | -3.81   | 12.08  | 7.53E-01 | 16.33  | 9.23  | 7.68E-02 | 5.89   | 8.76  | 5.01E-01 |
| cg04040925 | 22.01  | 10.79 | 4.14E-02 | 14.78  | 17.06 | 3.86E-01 | 58.82   | 31.84  | 6.47E-02 | 38.67  | 22.45 | 8.49E-02 | 1.56   | 21.42 | 9.42E-01 |
| cg07920376 | -8.31  | 4.07  | 4.14E-02 | -13.17 | 6.73  | 5.05E-02 | -0.94   | 9.92   | 9.25E-01 | -5.00  | 7.07  | 4.80E-01 | -12.49 | 11.13 | 2.62E-01 |
| cg13059495 | -7.36  | 3.61  | 4.14E-02 | -8.83  | 5.03  | 7.95E-02 | -3.52   | 7.42   | 6.35E-01 | -8.09  | 14.91 | 5.87E-01 | -7.98  | 8.30  | 3.36E-01 |
| cg13212435 | 5.39   | 2.65  | 4.14E-02 | 7.64   | 4.05  | 5.93E-02 | 4.49    | 6.04   | 4.58E-01 | 6.17   | 4.98  | 2.16E-01 | -4.58  | 8.34  | 5.83E-01 |
| cg02786269 | -21.33 | 10.46 | 4.14E-02 | -24.19 | 13.00 | 6.28E-02 | 17.80   | 49.14  | 7.17E-01 | -34.99 | 34.16 | 3.06E-01 | -14.96 | 22.62 | 5.08E-01 |
| cg17238015 | -13.06 | 6.41  | 4.14E-02 | -21.96 | 13.35 | 1.00E-01 | -7.03   | 21.17  | 7.40E-01 | -15.57 | 8.44  | 6.49E-02 | 15.89  | 20.09 | 4.29E-01 |
| cg17229371 | -12.61 | 6.18  | 4.14E-02 | -15.60 | 9.44  | 9.82E-02 | -14.54  | 15.79  | 3.57E-01 | -8.69  | 13.06 | 5.06E-01 | -8.96  | 14.07 | 5.24E-01 |
| cg16388983 | -15.80 | 7.75  | 4.14E-02 | 1.29   | 18.02 | 9.43E-01 | -23.23  | 39.47  | 5.56E-01 | -17.24 | 9.35  | 6.51E-02 | -37.11 | 26.04 | 1.54E-01 |
| cg23384708 | -8.23  | 4.04  | 4.15E-02 | -7.09  | 5.10  | 1.64E-01 | -13.13  | 9.78   | 1.79E-01 | -13.21 | 14.69 | 3.69E-01 | -4.32  | 11.36 | 7.03E-01 |
| cg11203927 | -30.77 | 15.09 | 4.15E-02 | -38.21 | 19.62 | 5.15E-02 | -15.60  | 40.54  | 7.00E-01 | -3.19  | 62.09 | 9.59E-01 | -27.59 | 32.86 | 4.01E-01 |
| cg25772076 | 20.36  | 9.98  | 4.15E-02 | 30.55  | 19.50 | 1.17E-01 | 21.36   | 19.95  | 2.84E-01 | 0.59   | 17.27 | 9.73E-01 | 44.34  | 25.48 | 8.19E-02 |
| cg26261793 | 34.52  | 16.93 | 4.15E-02 | 37.24  | 31.95 | 2.44E-01 | 38.45   | 136.00 | 7.77E-01 | 29.26  | 21.80 | 1.80E-01 | 57.93  | 53.40 | 2.78E-01 |
| cg09745864 | 18.13  | 8.89  | 4.15E-02 | -9.60  | 26.74 | 7.19E-01 | -28.78  | 40.92  | 4.82E-01 | 23.44  | 10.03 | 1.94E-02 | 38.00  | 37.71 | 3.14E-01 |
| cg26376809 | -44.74 | 21.94 | 4.15E-02 | -70.48 | 40.73 | 8.35E-02 | -238.85 | 183.38 | 1.93E-01 | -13.77 | 26.73 | 6.07E-01 | -76.19 | 45.39 | 9.33E-02 |
| cg09758937 | -13.97 | 6.85  | 4.15E-02 | -31.38 | 13.25 | 1.79E-02 | -7.83   | 20.99  | 7.09E-01 | -9.03  | 9.72  | 3.53E-01 | -1.99  | 19.02 | 9.17E-01 |
| cg11353792 | -8.93  | 4.38  | 4.15E-02 | -19.19 | 11.49 | 9.48E-02 | 7.00    | 18.58  | 7.06E-01 | -6.97  | 5.26  | 1.85E-01 | -16.06 | 13.49 | 2.34E-01 |
| cg10548399 | 16.43  | 8.06  | 4.15E-02 | 15.96  | 13.79 | 2.47E-01 | 13.91   | 14.96  | 3.52E-01 | 30.20  | 19.06 | 1.13E-01 | 8.15   | 18.52 | 6.60E-01 |
| cg05462570 | 12.22  | 5.99  | 4.15E-02 | 22.46  | 9.48  | 1.78E-02 | 11.12   | 15.43  | 4.71E-01 | 6.23   | 11.34 | 5.83E-01 | -1.03  | 14.53 | 9.43E-01 |
| cg00608548 | -5.40  | 2.65  | 4.15E-02 | -4.91  | 4.09  | 2.30E-01 | -14.01  | 5.49   | 1.06E-02 | -1.48  | 4.44  | 7.39E-01 | -2.49  | 6.52  | 7.02E-01 |
| cg02063759 | 15.32  | 7.51  | 4.15E-02 | 29.53  | 12.01 | 1.39E-02 | 0.74    | 18.45  | 9.68E-01 | 9.71   | 21.86 | 6.57E-01 | 7.67   | 13.18 | 5.60E-01 |
| cg05787063 | -10.30 | 5.05  | 4.15E-02 | -20.56 | 9.71  | 3.41E-02 | -18.00  | 17.05  | 2.91E-01 | -2.49  | 5.04  | 6.21E-01 | -16.34 | 10.39 | 1.16E-01 |
| cg05537380 | 23.20  | 11.38 | 4.15E-02 | 2.66   | 23.16 | 9.09E-01 | -10.11  | 35.94  | 7.78E-01 | 32.05  | 16.49 | 5.20E-02 | 45.58  | 26.64 | 8.71E-02 |
| cg04419856 | 15.98  | 7.84  | 4.15E-02 | 24.26  | 16.03 | 1.30E-01 | 13.10   | 16.35  | 4.23E-01 | 12.74  | 17.34 | 4.63E-01 | 13.98  | 13.73 | 3.08E-01 |
| cg18237510 | 20.20  | 9.91  | 4.15E-02 | -7.83  | 42.23 | 8.53E-01 | -4.54   | 154.84 | 9.77E-01 | 20.74  | 10.50 | 4.83E-02 | 43.57  | 44.25 | 3.25E-01 |
| cg01597553 | 10.93  | 5.36  | 4.15E-02 | 16.27  | 8.57  | 5.77E-02 | 22.68   | 16.31  | 1.64E-01 | 6.88   | 10.21 | 5.00E-01 | 0.96   | 11.31 | 9.32E-01 |
| cg16444001 | -47.06 | 23.09 | 4.15E-02 | -37.89 | 31.33 | 2.27E-01 | -18.76  | 94.10  | 8.42E-01 | -81.83 | 56.17 | 1.45E-01 | -50.63 | 48.37 | 2.95E-01 |

|            |        |       |          |         |       |          |         |        |          |        |       |          |         |       |          |
|------------|--------|-------|----------|---------|-------|----------|---------|--------|----------|--------|-------|----------|---------|-------|----------|
| cg09775648 | -10.98 | 5.39  | 4.15E-02 | -22.09  | 7.74  | 4.32E-03 | -9.67   | 14.55  | 5.06E-01 | -1.57  | 5.78  | 7.85E-01 | -13.81  | 9.64  | 1.52E-01 |
| cg14333394 | 6.11   | 3.00  | 4.15E-02 | 5.37    | 3.72  | 1.49E-01 | 8.97    | 7.96   | 2.60E-01 | 10.96  | 10.02 | 2.74E-01 | 3.12    | 8.68  | 7.19E-01 |
| cg17884766 | -8.53  | 4.18  | 4.15E-02 | -19.76  | 11.77 | 9.30E-02 | -2.28   | 25.44  | 9.29E-01 | -7.43  | 4.84  | 1.25E-01 | -4.17   | 13.26 | 7.53E-01 |
| cg11411705 | 10.39  | 5.10  | 4.15E-02 | 15.60   | 6.77  | 2.11E-02 | 10.20   | 18.34  | 5.78E-01 | 4.83   | 12.59 | 7.01E-01 | -0.21   | 11.65 | 9.86E-01 |
| cg16964728 | -8.16  | 4.01  | 4.15E-02 | -6.48   | 8.53  | 4.47E-01 | -3.16   | 12.39  | 7.99E-01 | -9.79  | 5.58  | 7.91E-02 | -8.50   | 10.04 | 3.97E-01 |
| cg15176678 | -17.67 | 8.67  | 4.15E-02 | -1.53   | 22.55 | 9.46E-01 | 27.07   | 85.73  | 7.52E-01 | -19.30 | 10.10 | 5.61E-02 | -33.26  | 26.70 | 2.13E-01 |
| cg12176463 | -8.41  | 4.13  | 4.15E-02 | -5.13   | 7.65  | 5.03E-01 | -6.27   | 10.08  | 5.33E-01 | -9.14  | 6.65  | 1.70E-01 | -14.97  | 10.41 | 1.50E-01 |
| cg17795164 | -25.36 | 12.44 | 4.15E-02 | -5.89   | 24.95 | 8.13E-01 | -132.81 | 118.50 | 2.62E-01 | -36.73 | 15.46 | 1.75E-02 | 14.58   | 40.85 | 7.21E-01 |
| cg23957144 | 19.75  | 9.69  | 4.15E-02 | 24.48   | 14.27 | 8.63E-02 | 26.63   | 22.39  | 2.34E-01 | -10.51 | 32.67 | 7.48E-01 | 16.69   | 18.88 | 3.77E-01 |
| cg03355298 | -74.29 | 36.45 | 4.15E-02 | -164.83 | 58.48 | 4.83E-03 | -240.66 | 291.39 | 4.09E-01 | -55.02 | 24.13 | 2.26E-02 | 10.92   | 76.28 | 8.86E-01 |
| cg17242608 | 13.07  | 6.41  | 4.15E-02 | 12.44   | 8.90  | 1.62E-01 | 2.73    | 17.77  | 8.78E-01 | 37.45  | 39.23 | 3.40E-01 | 16.23   | 11.28 | 1.50E-01 |
| cg08002381 | 45.74  | 22.44 | 4.15E-02 | 12.04   | 17.37 | 4.88E-01 | 88.07   | 68.44  | 1.98E-01 | 104.85 | 69.50 | 1.31E-01 | 69.09   | 29.52 | 1.93E-02 |
| cg09077340 | -58.32 | 28.62 | 4.15E-02 | -37.91  | 48.03 | 4.30E-01 | -422.33 | 275.92 | 1.26E-01 | -37.36 | 38.29 | 3.29E-01 | -120.74 | 61.87 | 5.10E-02 |
| cg00738869 | 13.39  | 6.57  | 4.16E-02 | 11.18   | 8.25  | 1.75E-01 | 31.09   | 30.35  | 3.06E-01 | 3.47   | 18.11 | 8.48E-01 | 23.47   | 15.22 | 1.23E-01 |
| cg06754532 | -10.64 | 5.22  | 4.16E-02 | -1.37   | 12.00 | 9.09E-01 | -32.73  | 20.02  | 1.02E-01 | -10.40 | 6.38  | 1.03E-01 | -16.15  | 19.20 | 4.00E-01 |
| cg13562353 | 12.14  | 5.96  | 4.16E-02 | 8.51    | 8.04  | 2.90E-01 | 32.17   | 13.64  | 1.83E-02 | 12.34  | 14.28 | 3.88E-01 | -1.47   | 15.74 | 9.26E-01 |
| cg03831847 | -7.26  | 3.56  | 4.16E-02 | -6.82   | 4.18  | 1.03E-01 | -13.45  | 8.17   | 9.97E-02 | 7.16   | 9.54  | 4.53E-01 | -13.19  | 8.13  | 1.05E-01 |
| cg26259758 | 34.35  | 16.85 | 4.16E-02 | 30.04   | 20.76 | 1.48E-01 | 71.00   | 56.85  | 2.12E-01 | 22.26  | 63.29 | 7.25E-01 | 36.96   | 39.48 | 3.49E-01 |
| cg08008475 | 21.12  | 10.36 | 4.16E-02 | 36.24   | 21.39 | 9.02E-02 | 26.30   | 40.95  | 5.21E-01 | 19.93  | 13.22 | 1.32E-01 | -15.16  | 35.18 | 6.67E-01 |
| cg02674305 | -15.87 | 7.79  | 4.16E-02 | -24.25  | 16.28 | 1.36E-01 | 29.81   | 58.43  | 6.10E-01 | -6.27  | 11.05 | 5.70E-01 | -30.12  | 15.37 | 5.00E-02 |
| cg08758850 | 16.22  | 7.96  | 4.16E-02 | 13.38   | 27.41 | 6.25E-01 | 47.32   | 56.25  | 4.00E-01 | 19.82  | 8.92  | 2.62E-02 | -16.58  | 25.26 | 5.11E-01 |
| cg19262972 | 10.34  | 5.07  | 4.16E-02 | 14.28   | 8.31  | 8.57E-02 | 26.69   | 12.61  | 3.43E-02 | 3.52   | 8.06  | 6.62E-01 | 0.40    | 13.14 | 9.76E-01 |
| cg04710641 | 21.06  | 10.34 | 4.16E-02 | 32.01   | 20.61 | 1.20E-01 | 7.26    | 25.75  | 7.78E-01 | 17.78  | 15.04 | 2.37E-01 | 29.96   | 30.50 | 3.26E-01 |
| cg07289133 | 20.67  | 10.14 | 4.16E-02 | 36.30   | 19.23 | 5.90E-02 | 15.38   | 19.00  | 4.18E-01 | 8.53   | 18.79 | 6.50E-01 | 25.43   | 26.59 | 3.39E-01 |
| cg23942980 | 24.21  | 11.88 | 4.16E-02 | 25.06   | 15.21 | 9.93E-02 | 7.78    | 63.83  | 9.03E-01 | 97.35  | 65.23 | 1.36E-01 | 16.82   | 20.94 | 4.22E-01 |
| cg11246222 | -9.66  | 4.74  | 4.16E-02 | -15.58  | 6.94  | 2.48E-02 | 1.39    | 10.14  | 8.91E-01 | 1.98   | 19.15 | 9.18E-01 | -11.11  | 9.41  | 2.38E-01 |
| cg08893650 | 44.27  | 21.73 | 4.16E-02 | 61.19   | 54.02 | 2.57E-01 | -71.30  | 207.11 | 7.31E-01 | 39.75  | 25.06 | 1.13E-01 | 69.83   | 79.01 | 3.77E-01 |
| cg22778952 | 15.55  | 7.63  | 4.16E-02 | 2.21    | 23.43 | 9.25E-01 | 15.41   | 39.50  | 6.96E-01 | 17.96  | 8.54  | 3.54E-02 | 6.77    | 31.98 | 8.32E-01 |
| cg13988448 | -11.19 | 5.49  | 4.16E-02 | -15.11  | 14.71 | 3.05E-01 | 8.90    | 16.55  | 5.91E-01 | -14.27 | 6.66  | 3.21E-02 | -5.10   | 20.81 | 8.06E-01 |
| cg03048654 | 11.36  | 5.57  | 4.16E-02 | 14.71   | 15.55 | 3.44E-01 | 38.47   | 45.66  | 4.00E-01 | 12.12  | 6.38  | 5.76E-02 | -3.67   | 18.13 | 8.40E-01 |
| cg16918327 | -9.60  | 4.71  | 4.16E-02 | -9.18   | 7.00  | 1.90E-01 | -18.27  | 11.31  | 1.06E-01 | -2.28  | 10.77 | 8.32E-01 | -10.07  | 11.03 | 3.62E-01 |
| cg18930910 | 3.85   | 1.89  | 4.16E-02 | 3.70    | 2.65  | 1.62E-01 | 6.81    | 4.49   | 1.29E-01 | 2.84   | 4.58  | 5.35E-01 | 1.91    | 4.99  | 7.01E-01 |
| cg25741116 | -5.24  | 2.57  | 4.16E-02 | -7.37   | 3.20  | 2.14E-02 | -6.96   | 6.03   | 2.49E-01 | -8.69  | 6.09  | 1.53E-01 | 3.20    | 5.17  | 5.35E-01 |
| cg09263755 | -21.05 | 10.33 | 4.16E-02 | -6.09   | 14.07 | 6.65E-01 | -50.54  | 28.09  | 7.20E-02 | -25.17 | 35.22 | 4.75E-01 | -36.60  | 21.12 | 8.31E-02 |
| cg08594681 | 8.58   | 4.21  | 4.16E-02 | 13.28   | 6.05  | 2.81E-02 | 8.36    | 10.40  | 4.22E-01 | 0.06   | 13.46 | 9.96E-01 | 3.00    | 8.39  | 7.20E-01 |

|            |        |       |          |         |       |          |         |        |          |         |       |          |         |       |          |
|------------|--------|-------|----------|---------|-------|----------|---------|--------|----------|---------|-------|----------|---------|-------|----------|
| cg15226029 | 20.53  | 10.08 | 4.16E-02 | 23.03   | 19.12 | 2.28E-01 | 34.83   | 19.94  | 8.08E-02 | 6.02    | 18.17 | 7.40E-01 | 21.27   | 25.23 | 3.99E-01 |
| cg01231543 | 11.08  | 5.44  | 4.16E-02 | 8.94    | 4.73  | 5.89E-02 | 23.76   | 8.28   | 4.12E-03 | -8.56   | 12.84 | 5.05E-01 | 13.46   | 11.23 | 2.31E-01 |
| cg08892416 | -84.34 | 41.40 | 4.16E-02 | -81.23  | 42.73 | 5.73E-02 | 173.01  | 162.55 | 2.87E-01 | -172.81 | 81.62 | 3.42E-02 | -78.03  | 84.45 | 3.56E-01 |
| cg15685834 | 13.05  | 6.41  | 4.16E-02 | 18.24   | 25.73 | 4.78E-01 | -49.54  | 84.15  | 5.56E-01 | 12.87   | 7.04  | 6.73E-02 | 14.90   | 19.96 | 4.55E-01 |
| cg27623562 | 10.99  | 5.39  | 4.16E-02 | 24.04   | 14.75 | 1.03E-01 | 3.45    | 23.61  | 8.84E-01 | 8.12    | 6.14  | 1.86E-01 | 31.20   | 26.11 | 2.32E-01 |
| cg14776578 | 7.66   | 3.76  | 4.16E-02 | 4.92    | 5.29  | 3.52E-01 | 6.83    | 7.65   | 3.72E-01 | 25.07   | 14.42 | 8.22E-02 | 9.81    | 8.73  | 2.61E-01 |
| cg10956904 | 20.99  | 10.30 | 4.16E-02 | -5.56   | 34.07 | 8.70E-01 | -39.06  | 111.24 | 7.25E-01 | 20.94   | 11.27 | 6.30E-02 | 67.96   | 40.89 | 9.65E-02 |
| cg14280658 | 20.15  | 9.89  | 4.16E-02 | 30.41   | 13.95 | 2.93E-02 | 17.05   | 26.07  | 5.13E-01 | 31.45   | 34.92 | 3.68E-01 | -0.41   | 18.93 | 9.83E-01 |
| cg13688524 | -50.41 | 24.74 | 4.16E-02 | -71.34  | 41.86 | 8.83E-02 | -176.12 | 138.41 | 2.03E-01 | -18.88  | 16.85 | 2.63E-01 | -102.56 | 53.03 | 5.31E-02 |
| cg23745839 | -8.06  | 3.96  | 4.16E-02 | -8.05   | 5.75  | 1.61E-01 | -11.01  | 9.11   | 2.27E-01 | 5.02    | 13.86 | 7.17E-01 | -10.07  | 7.82  | 1.98E-01 |
| cg05128520 | 5.85   | 2.87  | 4.16E-02 | 4.62    | 3.65  | 2.06E-01 | 10.14   | 6.58   | 1.23E-01 | 14.21   | 11.01 | 1.97E-01 | 0.81    | 8.14  | 9.21E-01 |
| cg25862345 | -10.31 | 5.06  | 4.16E-02 | -18.34  | 10.20 | 7.21E-02 | 6.03    | 18.94  | 7.50E-01 | -12.82  | 5.92  | 3.05E-02 | 8.72    | 14.71 | 5.54E-01 |
| cg03520624 | 30.01  | 14.73 | 4.17E-02 | 38.13   | 22.91 | 9.60E-02 | 16.55   | 28.05  | 5.55E-01 | -6.28   | 41.71 | 8.80E-01 | 56.33   | 34.20 | 9.96E-02 |
| cg06341027 | 24.53  | 12.04 | 4.17E-02 | 34.89   | 18.39 | 5.78E-02 | 22.78   | 35.96  | 5.26E-01 | 30.51   | 32.03 | 3.41E-01 | 8.50    | 21.37 | 6.91E-01 |
| cg12835949 | 16.95  | 8.32  | 4.17E-02 | 30.83   | 16.11 | 5.56E-02 | 14.26   | 19.60  | 4.67E-01 | 15.17   | 14.78 | 3.05E-01 | 5.69    | 17.15 | 7.40E-01 |
| cg10541864 | 9.55   | 4.69  | 4.17E-02 | 8.40    | 10.39 | 4.19E-01 | 7.52    | 11.85  | 5.26E-01 | 11.26   | 7.35  | 1.26E-01 | 8.94    | 9.71  | 3.57E-01 |
| cg05349042 | 39.73  | 19.51 | 4.17E-02 | 23.02   | 28.90 | 4.26E-01 | 115.26  | 73.93  | 1.19E-01 | 46.62   | 46.99 | 3.21E-01 | 43.60   | 35.48 | 2.19E-01 |
| cg16897550 | -18.33 | 9.00  | 4.17E-02 | -14.52  | 21.70 | 5.03E-01 | 9.35    | 53.02  | 8.60E-01 | -21.03  | 10.75 | 5.03E-02 | -13.82  | 28.79 | 6.31E-01 |
| cg26614229 | 11.12  | 5.46  | 4.17E-02 | 14.08   | 8.34  | 9.11E-02 | 26.87   | 15.46  | 8.23E-02 | 9.46    | 10.73 | 3.78E-01 | -3.87   | 12.63 | 7.59E-01 |
| cg11953881 | -15.21 | 7.47  | 4.17E-02 | -11.46  | 9.08  | 2.07E-01 | -13.87  | 16.93  | 4.13E-01 | -27.84  | 50.34 | 5.80E-01 | -38.65  | 22.79 | 9.00E-02 |
| cg21094405 | 8.07   | 3.96  | 4.17E-02 | 7.08    | 6.00  | 2.38E-01 | 3.53    | 10.07  | 7.25E-01 | 14.86   | 7.81  | 5.69E-02 | 4.00    | 10.16 | 6.94E-01 |
| cg26136365 | 15.22  | 7.48  | 4.17E-02 | 21.62   | 12.94 | 9.49E-02 | 16.47   | 16.13  | 3.07E-01 | 19.52   | 14.82 | 1.88E-01 | -2.49   | 16.83 | 8.83E-01 |
| cg10185519 | 11.64  | 5.72  | 4.17E-02 | 13.27   | 6.60  | 4.43E-02 | 16.03   | 36.56  | 6.61E-01 | 32.50   | 61.00 | 5.94E-01 | 4.65    | 12.28 | 7.05E-01 |
| cg19472956 | -35.29 | 17.33 | 4.17E-02 | -44.66  | 19.32 | 2.08E-02 | 62.39   | 59.76  | 2.96E-01 | -68.69  | 44.07 | 1.19E-01 | -28.23  | 31.14 | 3.65E-01 |
| cg07688262 | 17.22  | 8.45  | 4.17E-02 | 0.77    | 16.84 | 9.64E-01 | 12.19   | 16.48  | 4.60E-01 | 29.14   | 14.10 | 3.88E-02 | 26.67   | 23.89 | 2.64E-01 |
| cg17742459 | 10.30  | 5.06  | 4.17E-02 | 13.70   | 13.99 | 3.28E-01 | -6.07   | 16.41  | 7.12E-01 | 12.98   | 6.05  | 3.19E-02 | 0.23    | 18.34 | 9.90E-01 |
| cg05417285 | -28.77 | 14.13 | 4.17E-02 | -28.23  | 16.37 | 8.46E-02 | -44.55  | 89.75  | 6.20E-01 | -65.18  | 59.57 | 2.74E-01 | -17.06  | 33.89 | 6.15E-01 |
| cg09213106 | -44.25 | 21.73 | 4.17E-02 | -110.93 | 65.40 | 8.99E-02 | -153.98 | 334.62 | 6.45E-01 | -29.09  | 24.12 | 2.28E-01 | -104.44 | 79.72 | 1.90E-01 |
| cg26244575 | -6.13  | 3.01  | 4.17E-02 | -6.63   | 3.91  | 9.02E-02 | -9.34   | 7.65   | 2.22E-01 | -0.74   | 9.40  | 9.37E-01 | -4.55   | 7.78  | 5.58E-01 |
| cg06173216 | -7.47  | 3.67  | 4.17E-02 | -9.20   | 6.23  | 1.40E-01 | -9.60   | 11.46  | 4.02E-01 | -2.54   | 5.86  | 6.65E-01 | -14.56  | 9.24  | 1.15E-01 |
| cg25604067 | 14.03  | 6.89  | 4.17E-02 | 15.91   | 8.71  | 6.77E-02 | -9.53   | 22.73  | 6.75E-01 | 3.88    | 33.14 | 9.07E-01 | 20.02   | 14.11 | 1.56E-01 |
| cg16573136 | 39.53  | 19.41 | 4.17E-02 | 39.29   | 23.52 | 9.49E-02 | -13.83  | 82.60  | 8.67E-01 | 100.20  | 71.27 | 1.60E-01 | 32.19   | 44.58 | 4.70E-01 |
| cg10095938 | 30.90  | 15.17 | 4.17E-02 | -6.95   | 32.24 | 8.29E-01 | -10.56  | 71.25  | 8.82E-01 | 40.93   | 19.98 | 4.05E-02 | 59.56   | 38.38 | 1.21E-01 |
| cg14428027 | -27.38 | 13.44 | 4.17E-02 | -26.73  | 43.97 | 5.43E-01 | 2.55    | 163.67 | 9.88E-01 | -33.69  | 14.81 | 2.30E-02 | 37.35   | 48.68 | 4.43E-01 |
| cg08700032 | 14.53  | 7.14  | 4.17E-02 | 22.43   | 22.85 | 3.26E-01 | 30.28   | 70.18  | 6.66E-01 | 15.27   | 7.91  | 5.37E-02 | -4.91   | 25.43 | 8.47E-01 |

|                |        |       |          |        |       |          |         |        |          |         |       |          |        |       |          |
|----------------|--------|-------|----------|--------|-------|----------|---------|--------|----------|---------|-------|----------|--------|-------|----------|
| cg07622079     | -14.05 | 6.90  | 4.17E-02 | -15.82 | 15.68 | 3.13E-01 | -10.70  | 19.72  | 5.88E-01 | -12.54  | 9.03  | 1.65E-01 | -23.53 | 21.83 | 2.81E-01 |
| ch.12.1797162F | -17.87 | 8.78  | 4.17E-02 | -14.37 | 10.78 | 1.82E-01 | -1.44   | 15.66  | 9.27E-01 | -41.36  | 35.68 | 2.46E-01 | -43.86 | 19.49 | 2.44E-02 |
| cg13495205     | 11.33  | 5.56  | 4.17E-02 | 20.99  | 15.11 | 1.65E-01 | 33.42   | 19.60  | 8.82E-02 | 6.32    | 7.20  | 3.80E-01 | 10.80  | 12.86 | 4.01E-01 |
| cg18752041     | 7.37   | 3.62  | 4.17E-02 | 12.33  | 5.98  | 3.93E-02 | 5.01    | 6.41   | 4.34E-01 | 10.20   | 12.45 | 4.13E-01 | 1.72   | 7.52  | 8.19E-01 |
| cg14668118     | -16.29 | 8.00  | 4.17E-02 | -32.02 | 22.43 | 1.53E-01 | 17.43   | 37.57  | 6.43E-01 | -16.33  | 9.10  | 7.29E-02 | -7.18  | 34.26 | 8.34E-01 |
| cg14332120     | -6.69  | 3.28  | 4.17E-02 | -5.80  | 4.63  | 2.10E-01 | -8.96   | 7.80   | 2.51E-01 | -2.78   | 9.88  | 7.78E-01 | -8.96  | 7.19  | 2.12E-01 |
| cg01962989     | -10.80 | 5.30  | 4.17E-02 | -9.11  | 10.36 | 3.79E-01 | -4.97   | 18.00  | 7.82E-01 | -11.05  | 7.40  | 1.35E-01 | -16.74 | 14.31 | 2.42E-01 |
| cg09046974     | 18.50  | 9.09  | 4.17E-02 | 20.58  | 10.04 | 4.04E-02 | -58.19  | 54.69  | 2.87E-01 | 14.58   | 40.87 | 7.21E-01 | 24.42  | 28.27 | 3.88E-01 |
| cg15660418     | 13.87  | 6.81  | 4.17E-02 | 14.95  | 10.26 | 1.45E-01 | 26.81   | 18.64  | 1.50E-01 | 17.92   | 23.70 | 4.50E-01 | 6.47   | 11.62 | 5.77E-01 |
| cg05757757     | 10.63  | 5.22  | 4.17E-02 | 18.24  | 8.43  | 3.05E-02 | 6.46    | 11.41  | 5.71E-01 | 9.04    | 12.74 | 4.78E-01 | 3.18   | 10.69 | 7.66E-01 |
| cg20529969     | -35.82 | 17.59 | 4.17E-02 | -32.57 | 21.98 | 1.38E-01 | -11.08  | 59.48  | 8.52E-01 | -156.67 | 75.74 | 3.86E-02 | -25.38 | 37.68 | 5.01E-01 |
| cg06952671     | 26.28  | 12.91 | 4.17E-02 | -7.17  | 43.94 | 8.70E-01 | 45.46   | 187.72 | 8.09E-01 | 27.40   | 14.04 | 5.10E-02 | 54.91  | 50.84 | 2.80E-01 |
| cg05272888     | -21.40 | 10.51 | 4.18E-02 | -26.28 | 19.75 | 1.83E-01 | -0.89   | 40.46  | 9.82E-01 | -14.02  | 14.96 | 3.49E-01 | -44.86 | 26.65 | 9.23E-02 |
| cg06484303     | -7.92  | 3.89  | 4.18E-02 | -15.02 | 8.38  | 7.30E-02 | 7.64    | 11.71  | 5.14E-01 | -8.51   | 5.16  | 9.87E-02 | -6.47  | 11.98 | 5.89E-01 |
| cg01451162     | 7.26   | 3.57  | 4.18E-02 | 3.83   | 4.79  | 4.24E-01 | 16.19   | 7.87   | 3.97E-02 | 1.14    | 23.00 | 9.61E-01 | 8.26   | 7.67  | 2.81E-01 |
| cg21426759     | 4.48   | 2.20  | 4.18E-02 | 3.35   | 2.88  | 2.44E-01 | 10.41   | 5.29   | 4.92E-02 | 4.19    | 5.85  | 4.74E-01 | 1.25   | 6.91  | 8.57E-01 |
| cg14029489     | 15.34  | 7.54  | 4.18E-02 | 20.16  | 23.99 | 4.01E-01 | 9.01    | 19.76  | 6.48E-01 | 25.87   | 8.52  | 2.39E-03 | -2.74  | 12.99 | 8.33E-01 |
| cg14308424     | 25.41  | 12.48 | 4.18E-02 | 24.79  | 14.65 | 9.07E-02 | 20.68   | 50.39  | 6.82E-01 | -26.45  | 65.33 | 6.86E-01 | 40.34  | 29.70 | 1.74E-01 |
| cg03570858     | 41.81  | 20.54 | 4.18E-02 | 7.52   | 65.55 | 9.09E-01 | -292.51 | 280.10 | 2.96E-01 | 48.27   | 22.66 | 3.31E-02 | 39.93  | 75.16 | 5.95E-01 |
| cg13800586     | -29.23 | 14.36 | 4.18E-02 | -2.81  | 21.51 | 8.96E-01 | -45.16  | 27.30  | 9.81E-02 | -55.97  | 20.90 | 7.41E-03 | -5.15  | 32.82 | 8.75E-01 |
| cg04761094     | 21.40  | 10.51 | 4.18E-02 | 31.33  | 21.66 | 1.48E-01 | 15.54   | 20.68  | 4.52E-01 | 24.52   | 18.91 | 1.95E-01 | 12.32  | 23.65 | 6.02E-01 |
| cg10279487     | -14.03 | 6.89  | 4.18E-02 | -27.27 | 15.27 | 7.41E-02 | 7.37    | 17.51  | 6.74E-01 | -11.39  | 10.21 | 2.64E-01 | -23.89 | 16.02 | 1.36E-01 |
| cg03274401     | 8.36   | 4.11  | 4.18E-02 | 15.61  | 8.39  | 6.29E-02 | 13.62   | 10.93  | 2.13E-01 | 4.65    | 5.54  | 4.02E-01 | 2.13   | 15.38 | 8.90E-01 |
| cg07501729     | 16.30  | 8.01  | 4.18E-02 | 10.24  | 14.48 | 4.79E-01 | 14.80   | 14.71  | 3.14E-01 | 10.30   | 15.41 | 5.04E-01 | 46.87  | 22.37 | 3.62E-02 |
| cg07753203     | 7.48   | 3.68  | 4.18E-02 | 5.83   | 5.14  | 2.57E-01 | 10.31   | 8.30   | 2.14E-01 | -1.79   | 11.44 | 8.75E-01 | 14.07  | 8.45  | 9.57E-02 |
| cg21348508     | 13.36  | 6.56  | 4.18E-02 | 11.24  | 13.65 | 4.10E-01 | 13.48   | 11.75  | 2.51E-01 | 11.20   | 11.87 | 3.46E-01 | 20.70  | 16.86 | 2.20E-01 |
| cg16196077     | 9.96   | 4.89  | 4.18E-02 | 14.23  | 9.06  | 1.16E-01 | 7.34    | 19.03  | 7.00E-01 | 6.71    | 6.89  | 3.30E-01 | 14.02  | 13.14 | 2.86E-01 |
| cg15471402     | 8.72   | 4.28  | 4.18E-02 | 1.82   | 7.99  | 8.20E-01 | 13.53   | 10.38  | 1.93E-01 | 11.30   | 7.04  | 1.08E-01 | 9.95   | 10.33 | 3.36E-01 |
| cg10238092     | 15.98  | 7.85  | 4.18E-02 | 14.01  | 19.18 | 4.65E-01 | -5.87   | 46.06  | 8.99E-01 | 19.12   | 9.23  | 3.82E-02 | -0.42  | 27.73 | 9.88E-01 |
| cg00081602     | 20.97  | 10.30 | 4.18E-02 | 45.01  | 22.21 | 4.27E-02 | 5.50    | 32.95  | 8.67E-01 | 10.01   | 10.91 | 3.59E-01 | 50.66  | 29.55 | 8.64E-02 |
| cg11115391     | 17.36  | 8.53  | 4.18E-02 | 23.88  | 20.08 | 2.35E-01 | 34.61   | 16.19  | 3.26E-02 | 1.15    | 12.82 | 9.28E-01 | 28.30  | 26.01 | 2.77E-01 |
| cg00090619     | 13.29  | 6.53  | 4.18E-02 | 5.16   | 11.52 | 6.54E-01 | 9.10    | 15.78  | 5.64E-01 | 25.17   | 11.35 | 2.65E-02 | 9.86   | 15.52 | 5.25E-01 |
| cg11382589     | 5.69   | 2.80  | 4.18E-02 | 7.86   | 4.36  | 7.12E-02 | 9.27    | 6.12   | 1.30E-01 | 8.33    | 7.50  | 2.66E-01 | -2.65  | 5.69  | 6.42E-01 |
| cg24260327     | 12.02  | 5.91  | 4.18E-02 | 5.58   | 8.26  | 4.99E-01 | 23.71   | 14.96  | 1.13E-01 | 26.43   | 17.23 | 1.25E-01 | 10.98  | 12.72 | 3.88E-01 |
| cg12093662     | -30.96 | 15.21 | 4.18E-02 | -55.58 | 26.45 | 3.56E-02 | -45.25  | 56.12  | 4.20E-01 | -21.25  | 24.03 | 3.77E-01 | -3.78  | 34.46 | 9.13E-01 |

|            |        |       |          |        |       |          |         |        |          |        |       |          |        |       |          |
|------------|--------|-------|----------|--------|-------|----------|---------|--------|----------|--------|-------|----------|--------|-------|----------|
| cg08486575 | 21.52  | 10.57 | 4.18E-02 | 21.99  | 30.68 | 4.74E-01 | 10.54   | 139.80 | 9.40E-01 | 21.08  | 11.68 | 7.11E-02 | 27.97  | 44.56 | 5.30E-01 |
| cg06948878 | 19.03  | 9.35  | 4.18E-02 | 35.50  | 20.00 | 7.59E-02 | 15.71   | 18.52  | 3.96E-01 | 5.58   | 14.93 | 7.09E-01 | 37.75  | 25.48 | 1.38E-01 |
| cg22340807 | 6.38   | 3.13  | 4.18E-02 | 6.57   | 5.87  | 2.63E-01 | 8.21    | 8.48   | 3.33E-01 | 9.43   | 4.71  | 4.50E-02 | -5.88  | 8.51  | 4.89E-01 |
| cg16472389 | -6.56  | 3.22  | 4.18E-02 | -3.88  | 4.58  | 3.97E-01 | -17.09  | 6.94   | 1.38E-02 | -0.31  | 8.97  | 9.72E-01 | -5.70  | 6.75  | 3.98E-01 |
| cg13186130 | 9.14   | 4.49  | 4.18E-02 | 13.27  | 6.88  | 5.38E-02 | 17.77   | 11.65  | 1.27E-01 | 2.50   | 10.24 | 8.07E-01 | 1.59   | 9.29  | 8.64E-01 |
| cg04915064 | -14.74 | 7.24  | 4.18E-02 | -19.86 | 20.66 | 3.36E-01 | -24.56  | 37.49  | 5.12E-01 | -13.57 | 8.15  | 9.61E-02 | -13.29 | 31.97 | 6.78E-01 |
| cg05847038 | 12.04  | 5.91  | 4.18E-02 | 16.54  | 13.19 | 2.10E-01 | 0.60    | 21.69  | 9.78E-01 | 13.25  | 7.35  | 7.16E-02 | 1.23   | 21.24 | 9.54E-01 |
| cg06723829 | -10.94 | 5.37  | 4.18E-02 | 1.88   | 20.29 | 9.26E-01 | -13.10  | 29.47  | 6.57E-01 | -11.84 | 5.78  | 4.04E-02 | -12.44 | 30.32 | 6.82E-01 |
| cg24211388 | 4.83   | 2.37  | 4.18E-02 | 4.33   | 2.86  | 1.30E-01 | 10.97   | 5.93   | 6.43E-02 | -1.21  | 8.92  | 8.92E-01 | 2.20   | 8.33  | 7.92E-01 |
| cg16517523 | 32.62  | 16.03 | 4.18E-02 | 30.96  | 18.28 | 9.03E-02 | 46.98   | 110.65 | 6.71E-01 | 7.98   | 65.37 | 9.03E-01 | 48.96  | 41.36 | 2.36E-01 |
| cg01138020 | 29.04  | 14.27 | 4.18E-02 | 30.99  | 15.46 | 4.49E-02 | -101.76 | 144.79 | 4.82E-01 | -43.55 | 79.91 | 5.86E-01 | 47.21  | 43.86 | 2.82E-01 |
| cg25189523 | -12.90 | 6.34  | 4.18E-02 | -18.31 | 16.88 | 2.78E-01 | -16.64  | 32.06  | 6.04E-01 | -14.55 | 7.27  | 4.51E-02 | 24.33  | 26.28 | 3.55E-01 |
| cg12452849 | 26.39  | 12.97 | 4.18E-02 | 49.23  | 40.31 | 2.22E-01 | 94.14   | 153.66 | 5.40E-01 | 26.18  | 14.54 | 7.17E-02 | -2.26  | 42.42 | 9.58E-01 |
| cg17978331 | 26.30  | 12.92 | 4.18E-02 | 31.76  | 23.95 | 1.85E-01 | 24.11   | 51.64  | 6.41E-01 | 17.95  | 19.08 | 3.47E-01 | 38.96  | 29.84 | 1.92E-01 |
| cg24362716 | -6.91  | 3.39  | 4.18E-02 | -10.17 | 4.63  | 2.81E-02 | -6.64   | 8.05   | 4.10E-01 | -2.81  | 12.37 | 8.20E-01 | -0.25  | 7.41  | 9.73E-01 |
| cg10830518 | 28.01  | 13.76 | 4.18E-02 | 7.55   | 26.98 | 7.80E-01 | 27.36   | 81.64  | 7.38E-01 | 35.49  | 17.75 | 4.55E-02 | 35.68  | 41.49 | 3.90E-01 |
| cg16958106 | 18.36  | 9.02  | 4.18E-02 | 20.82  | 18.54 | 2.61E-01 | 30.08   | 17.46  | 8.49E-02 | 9.18   | 14.62 | 5.30E-01 | 16.44  | 26.53 | 5.35E-01 |
| cg04819760 | 22.23  | 10.92 | 4.18E-02 | 37.71  | 15.04 | 1.22E-02 | 51.29   | 33.77  | 1.29E-01 | 4.25   | 20.98 | 8.40E-01 | 3.03   | 19.92 | 8.79E-01 |
| cg13168012 | -14.10 | 6.93  | 4.18E-02 | -24.74 | 10.83 | 2.24E-02 | -4.02   | 15.83  | 7.99E-01 | -19.42 | 17.96 | 2.80E-01 | -1.25  | 13.86 | 9.28E-01 |
| cg18519050 | 28.71  | 14.11 | 4.18E-02 | 25.39  | 19.68 | 1.97E-01 | 54.17   | 28.49  | 5.73E-02 | 41.09  | 50.03 | 4.11E-01 | -5.54  | 35.16 | 8.75E-01 |
| cg11992736 | -5.79  | 2.85  | 4.18E-02 | -8.43  | 3.76  | 2.48E-02 | -4.80   | 5.72   | 4.01E-01 | 14.03  | 19.04 | 4.61E-01 | -0.52  | 7.17  | 9.42E-01 |
| cg21035905 | 16.20  | 7.96  | 4.18E-02 | 19.56  | 21.95 | 3.73E-01 | -9.16   | 43.96  | 8.35E-01 | 19.07  | 9.23  | 3.89E-02 | -2.62  | 26.12 | 9.20E-01 |
| cg24884572 | 18.65  | 9.17  | 4.18E-02 | 34.30  | 26.67 | 1.98E-01 | 20.41   | 16.69  | 2.21E-01 | 20.76  | 13.50 | 1.24E-01 | -9.38  | 26.51 | 7.23E-01 |
| cg25880211 | -11.24 | 5.52  | 4.18E-02 | -18.80 | 11.52 | 1.03E-01 | -24.90  | 21.63  | 2.50E-01 | -4.50  | 7.26  | 5.35E-01 | -21.39 | 15.57 | 1.70E-01 |
| cg24458917 | 31.87  | 15.66 | 4.19E-02 | 56.02  | 20.72 | 6.87E-03 | 8.63    | 23.55  | 7.14E-01 | 9.29   | 10.26 | 3.65E-01 | 71.41  | 27.56 | 9.57E-03 |
| cg24281346 | -15.83 | 7.78  | 4.19E-02 | -26.90 | 16.34 | 9.97E-02 | -30.20  | 35.54  | 3.95E-01 | -15.50 | 9.95  | 1.19E-01 | 10.27  | 22.94 | 6.54E-01 |
| cg17391741 | 11.94  | 5.87  | 4.19E-02 | 5.87   | 15.72 | 7.09E-01 | -2.49   | 12.27  | 8.39E-01 | 17.69  | 7.79  | 2.33E-02 | 25.35  | 22.84 | 2.67E-01 |
| cg22684041 | 7.41   | 3.64  | 4.19E-02 | 9.08   | 4.82  | 5.98E-02 | 6.34    | 9.97   | 5.25E-01 | 0.93   | 8.72  | 9.15E-01 | 10.12  | 10.48 | 3.34E-01 |
| cg05641885 | -27.16 | 13.35 | 4.19E-02 | -40.71 | 18.79 | 3.03E-02 | -43.04  | 40.71  | 2.90E-01 | -13.73 | 35.87 | 7.02E-01 | -0.36  | 26.73 | 9.89E-01 |
| cg08375882 | -25.74 | 12.65 | 4.19E-02 | -22.02 | 17.23 | 2.01E-01 | -1.11   | 50.32  | 9.82E-01 | -46.94 | 24.79 | 5.83E-02 | -11.43 | 34.19 | 7.38E-01 |
| cg17375124 | 16.50  | 8.11  | 4.19E-02 | 23.09  | 13.54 | 8.83E-02 | 0.68    | 15.10  | 9.64E-01 | 10.30  | 19.93 | 6.05E-01 | 33.78  | 18.75 | 7.16E-02 |
| cg06793796 | -4.90  | 2.41  | 4.19E-02 | -5.34  | 4.14  | 1.97E-01 | -0.05   | 5.15   | 9.93E-01 | -4.64  | 4.51  | 3.04E-01 | -11.07 | 6.04  | 6.66E-02 |
| cg10279254 | 54.93  | 27.00 | 4.19E-02 | 53.15  | 34.81 | 1.27E-01 | 65.73   | 146.36 | 6.53E-01 | 46.44  | 75.51 | 5.39E-01 | 62.51  | 55.52 | 2.60E-01 |
| cg23686214 | -13.71 | 6.74  | 4.19E-02 | -12.00 | 14.91 | 4.21E-01 | 13.63   | 26.11  | 6.02E-01 | -15.75 | 8.47  | 6.30E-02 | -22.85 | 21.72 | 2.93E-01 |
| cg20168412 | 18.25  | 8.97  | 4.19E-02 | 20.44  | 15.27 | 1.81E-01 | -13.78  | 34.27  | 6.88E-01 | 25.65  | 13.52 | 5.78E-02 | 5.82   | 23.45 | 8.04E-01 |

|            |        |       |          |        |       |          |         |        |          |        |       |          |        |       |          |
|------------|--------|-------|----------|--------|-------|----------|---------|--------|----------|--------|-------|----------|--------|-------|----------|
| cg10762109 | 14.27  | 7.02  | 4.19E-02 | 2.41   | 18.23 | 8.95E-01 | 59.04   | 56.91  | 2.99E-01 | 16.75  | 7.98  | 3.57E-02 | 0.89   | 27.99 | 9.75E-01 |
| cg10832186 | 8.00   | 3.93  | 4.19E-02 | 7.32   | 7.52  | 3.30E-01 | 2.59    | 10.71  | 8.09E-01 | 8.15   | 5.56  | 1.43E-01 | 17.32  | 13.06 | 1.85E-01 |
| cg14431986 | 26.17  | 12.86 | 4.19E-02 | 20.58  | 16.55 | 2.14E-01 | 66.13   | 46.15  | 1.52E-01 | -0.45  | 47.19 | 9.92E-01 | 35.35  | 26.02 | 1.74E-01 |
| cg19126110 | -9.02  | 4.43  | 4.19E-02 | -16.65 | 9.51  | 8.01E-02 | -12.78  | 11.79  | 2.79E-01 | -3.73  | 6.15  | 5.43E-01 | -13.59 | 12.69 | 2.84E-01 |
| cg13558462 | 15.61  | 7.67  | 4.19E-02 | 15.76  | 15.11 | 2.97E-01 | 13.74   | 16.87  | 4.15E-01 | 10.22  | 12.03 | 3.96E-01 | 35.25  | 21.35 | 9.88E-02 |
| cg08599085 | -13.24 | 6.51  | 4.19E-02 | 2.80   | 14.40 | 8.46E-01 | -7.59   | 40.53  | 8.51E-01 | -17.37 | 7.69  | 2.38E-02 | -21.74 | 28.11 | 4.39E-01 |
| cg14584535 | 5.40   | 2.65  | 4.19E-02 | 4.39   | 3.52  | 2.12E-01 | 11.10   | 6.34   | 7.97E-02 | 3.65   | 7.63  | 6.32E-01 | 3.81   | 7.27  | 6.00E-01 |
| cg21029612 | 16.81  | 8.26  | 4.19E-02 | 37.20  | 19.48 | 5.61E-02 | 5.05    | 63.59  | 9.37E-01 | 7.21   | 10.40 | 4.88E-01 | 31.90  | 19.95 | 1.10E-01 |
| cg13267718 | -16.38 | 8.05  | 4.19E-02 | -21.89 | 20.95 | 2.96E-01 | 37.83   | 40.25  | 3.47E-01 | -19.91 | 9.35  | 3.32E-02 | 1.60   | 30.44 | 9.58E-01 |
| cg26913186 | 16.37  | 8.05  | 4.19E-02 | -2.47  | 21.51 | 9.09E-01 | 34.05   | 23.78  | 1.52E-01 | 14.38  | 9.86  | 1.45E-01 | 40.90  | 28.60 | 1.53E-01 |
| cg09046445 | 11.10  | 5.46  | 4.19E-02 | 16.26  | 7.87  | 3.88E-02 | 18.66   | 13.35  | 1.62E-01 | 5.62   | 15.06 | 7.09E-01 | -2.57  | 11.59 | 8.25E-01 |
| cg10222925 | -9.78  | 4.81  | 4.19E-02 | -16.08 | 11.67 | 1.68E-01 | -32.78  | 20.13  | 1.03E-01 | -7.03  | 5.80  | 2.26E-01 | -4.09  | 16.27 | 8.01E-01 |
| cg06489367 | 9.91   | 4.87  | 4.19E-02 | 12.96  | 7.14  | 6.97E-02 | 16.88   | 12.96  | 1.93E-01 | 5.30   | 11.23 | 6.37E-01 | 2.46   | 10.74 | 8.19E-01 |
| cg08032088 | 96.83  | 47.60 | 4.19E-02 | 74.78  | 74.96 | 3.18E-01 | 299.46  | 233.11 | 1.99E-01 | 99.07  | 93.18 | 2.88E-01 | 96.35  | 87.77 | 2.72E-01 |
| cg13413384 | 7.20   | 3.54  | 4.19E-02 | 6.50   | 4.30  | 1.31E-01 | 15.22   | 10.46  | 1.46E-01 | 2.64   | 13.73 | 8.47E-01 | 6.20   | 9.39  | 5.09E-01 |
| cg07072643 | 8.77   | 4.31  | 4.19E-02 | 3.37   | 5.81  | 5.62E-01 | 19.26   | 9.73   | 4.78E-02 | 23.25  | 17.37 | 1.81E-01 | 8.87   | 9.85  | 3.68E-01 |
| cg08822118 | 13.07  | 6.42  | 4.19E-02 | 9.08   | 9.34  | 3.31E-01 | 22.82   | 13.22  | 8.44E-02 | 24.88  | 22.46 | 2.68E-01 | 6.45   | 14.05 | 6.46E-01 |
| cg17934470 | 5.74   | 2.82  | 4.19E-02 | 6.58   | 3.76  | 8.03E-02 | 7.44    | 7.10   | 2.95E-01 | 6.78   | 7.78  | 3.84E-01 | -0.17  | 7.32  | 9.81E-01 |
| cg14110073 | 18.84  | 9.26  | 4.19E-02 | 16.86  | 30.46 | 5.80E-01 | -27.77  | 72.03  | 7.00E-01 | 19.64  | 10.34 | 5.74E-02 | 22.31  | 31.15 | 4.74E-01 |
| cg15400200 | 26.95  | 13.25 | 4.19E-02 | 47.91  | 40.93 | 2.42E-01 | -97.23  | 168.41 | 5.64E-01 | 24.21  | 14.54 | 9.59E-02 | 41.63  | 54.94 | 4.49E-01 |
| cg13246856 | -8.87  | 4.36  | 4.19E-02 | -10.00 | 6.24  | 1.09E-01 | 2.48    | 11.42  | 8.28E-01 | -20.14 | 10.26 | 4.96E-02 | -3.79  | 10.14 | 7.08E-01 |
| cg10190808 | 19.03  | 9.36  | 4.19E-02 | 6.10   | 33.77 | 8.57E-01 | -108.32 | 114.72 | 3.45E-01 | 19.96  | 10.01 | 4.61E-02 | 43.19  | 45.40 | 3.41E-01 |
| cg11157800 | 22.30  | 10.96 | 4.19E-02 | 13.10  | 8.45  | 1.21E-01 | 13.49   | 32.57  | 6.79E-01 | 18.51  | 49.67 | 7.09E-01 | 58.70  | 22.43 | 8.89E-03 |
| cg12590404 | 11.41  | 5.61  | 4.19E-02 | 11.18  | 7.71  | 1.47E-01 | 15.64   | 12.74  | 2.19E-01 | 25.15  | 11.81 | 3.31E-02 | -4.77  | 11.50 | 6.78E-01 |
| cg09101902 | -6.12  | 3.01  | 4.19E-02 | -5.51  | 4.28  | 1.97E-01 | -0.12   | 7.30   | 9.87E-01 | -10.01 | 7.64  | 1.90E-01 | -10.07 | 7.08  | 1.55E-01 |
| cg04257238 | -10.86 | 5.34  | 4.20E-02 | -11.64 | 11.15 | 2.97E-01 | -10.06  | 15.06  | 5.04E-01 | -6.17  | 7.34  | 4.00E-01 | -31.58 | 15.69 | 4.41E-02 |
| cg16227251 | -11.35 | 5.58  | 4.20E-02 | -16.98 | 10.27 | 9.83E-02 | -18.36  | 16.29  | 2.60E-01 | -2.54  | 8.49  | 7.64E-01 | -19.89 | 14.18 | 1.61E-01 |
| cg10173831 | 17.54  | 8.63  | 4.20E-02 | 24.82  | 19.23 | 1.97E-01 | 7.58    | 20.40  | 7.10E-01 | 14.29  | 11.97 | 2.33E-01 | 37.55  | 27.22 | 1.68E-01 |
| cg23319797 | -41.42 | 20.37 | 4.20E-02 | -15.87 | 48.90 | 7.45E-01 | -77.06  | 219.50 | 7.26E-01 | -51.54 | 23.85 | 3.07E-02 | -4.83  | 68.34 | 9.44E-01 |
| cg19738490 | 15.12  | 7.43  | 4.20E-02 | -8.10  | 20.42 | 6.92E-01 | 33.56   | 27.24  | 2.18E-01 | 15.00  | 8.66  | 8.31E-02 | 47.50  | 31.60 | 1.33E-01 |
| cg23013137 | -8.32  | 4.09  | 4.20E-02 | -10.13 | 5.06  | 4.51E-02 | -13.65  | 10.42  | 1.90E-01 | 18.59  | 17.02 | 2.75E-01 | -4.90  | 11.18 | 6.61E-01 |
| cg02717630 | 23.97  | 11.79 | 4.20E-02 | -2.13  | 24.02 | 9.29E-01 | -5.11   | 85.00  | 9.52E-01 | 28.71  | 14.60 | 4.92E-02 | 66.72  | 39.78 | 9.35E-02 |
| cg11158979 | -19.66 | 9.67  | 4.20E-02 | -20.59 | 16.26 | 2.05E-01 | -9.08   | 35.55  | 7.98E-01 | -23.00 | 15.30 | 1.33E-01 | -14.59 | 23.20 | 5.29E-01 |
| cg14574489 | 2.95   | 1.45  | 4.20E-02 | 1.15   | 2.10  | 5.84E-01 | 4.49    | 3.07   | 1.44E-01 | 4.44   | 3.61  | 2.18E-01 | 5.09   | 3.98  | 2.01E-01 |
| cg01861389 | 22.06  | 10.85 | 4.20E-02 | 1.49   | 24.52 | 9.51E-01 | -33.02  | 75.84  | 6.63E-01 | 23.94  | 12.99 | 6.54E-02 | 65.99  | 36.71 | 7.22E-02 |



|            |        |       |          |        |       |          |        |        |          |        |       |          |        |       |          |
|------------|--------|-------|----------|--------|-------|----------|--------|--------|----------|--------|-------|----------|--------|-------|----------|
| cg24272902 | 22.83  | 11.23 | 4.20E-02 | 50.02  | 30.06 | 9.61E-02 | -77.36 | 111.10 | 4.86E-01 | 21.18  | 12.64 | 9.38E-02 | -1.09  | 45.32 | 9.81E-01 |
| cg14547461 | 5.30   | 2.61  | 4.20E-02 | 5.94   | 3.70  | 1.08E-01 | 13.98  | 6.41   | 2.92E-02 | 2.82   | 4.84  | 5.60E-01 | -1.88  | 6.90  | 7.85E-01 |
| cg02455383 | 8.15   | 4.01  | 4.20E-02 | 6.73   | 5.24  | 1.99E-01 | 23.35  | 11.39  | 4.05E-02 | 9.03   | 10.57 | 3.93E-01 | 0.18   | 10.43 | 9.86E-01 |
| cg11738011 | 29.87  | 14.69 | 4.20E-02 | 33.98  | 16.70 | 4.19E-02 | 61.95  | 95.57  | 5.17E-01 | 64.97  | 62.06 | 2.95E-01 | -10.27 | 38.29 | 7.89E-01 |
| cg27341915 | 17.71  | 8.71  | 4.20E-02 | 9.40   | 19.50 | 6.30E-01 | 3.15   | 25.80  | 9.03E-01 | 17.18  | 11.15 | 1.23E-01 | 64.93  | 31.38 | 3.85E-02 |
| cg03497750 | 15.13  | 7.44  | 4.20E-02 | 13.95  | 9.39  | 1.37E-01 | -6.37  | 15.74  | 6.86E-01 | 21.28  | 36.42 | 5.59E-01 | 30.61  | 12.50 | 1.44E-02 |
| cg04931238 | -6.15  | 3.02  | 4.20E-02 | -11.05 | 6.64  | 9.62E-02 | 3.08   | 8.23   | 7.08E-01 | -8.54  | 4.20  | 4.19E-02 | 1.11   | 8.10  | 8.91E-01 |
| cg16020118 | 7.97   | 3.92  | 4.20E-02 | 7.74   | 5.44  | 1.55E-01 | 10.50  | 7.24   | 1.47E-01 | -9.60  | 15.47 | 5.35E-01 | 12.06  | 11.12 | 2.78E-01 |
| cg10716494 | -16.24 | 7.99  | 4.20E-02 | -22.33 | 12.42 | 7.23E-02 | -28.38 | 21.39  | 1.85E-01 | 0.96   | 15.94 | 9.52E-01 | -16.78 | 18.01 | 3.52E-01 |
| cg26601496 | 17.09  | 8.40  | 4.20E-02 | 8.84   | 9.88  | 3.71E-01 | 21.55  | 14.92  | 1.49E-01 | 52.14  | 21.17 | 1.38E-02 | 5.53   | 16.44 | 7.37E-01 |
| cg05617650 | 11.98  | 5.89  | 4.20E-02 | 9.32   | 7.50  | 2.14E-01 | 34.09  | 15.11  | 2.41E-02 | 15.70  | 11.97 | 1.90E-01 | -1.16  | 12.24 | 9.24E-01 |
| cg06851817 | -10.40 | 5.12  | 4.20E-02 | -13.19 | 7.56  | 8.12E-02 | -8.65  | 12.73  | 4.97E-01 | -4.27  | 14.81 | 7.73E-01 | -9.41  | 10.00 | 3.47E-01 |
| cg02854972 | -8.45  | 4.15  | 4.20E-02 | -13.25 | 6.11  | 3.02E-02 | -2.60  | 9.11   | 7.75E-01 | -7.86  | 12.42 | 5.27E-01 | -4.16  | 8.89  | 6.39E-01 |
| cg26676090 | -9.45  | 4.65  | 4.20E-02 | 0.23   | 11.86 | 9.84E-01 | -12.27 | 17.04  | 4.72E-01 | -8.59  | 5.60  | 1.25E-01 | -31.78 | 16.08 | 4.81E-02 |
| cg06836497 | -26.32 | 12.95 | 4.20E-02 | -72.85 | 48.12 | 1.30E-01 | -99.07 | 180.71 | 5.84E-01 | -22.86 | 13.84 | 9.86E-02 | -11.33 | 59.29 | 8.48E-01 |
| cg14727952 | -28.82 | 14.18 | 4.20E-02 | -23.39 | 17.60 | 1.84E-01 | -88.81 | 55.91  | 1.12E-01 | -8.99  | 79.20 | 9.10E-01 | -30.02 | 28.09 | 2.85E-01 |
| cg05570314 | 44.57  | 21.92 | 4.20E-02 | 27.60  | 28.54 | 3.34E-01 | 149.18 | 113.34 | 1.88E-01 | 79.80  | 68.80 | 2.46E-01 | 53.90  | 42.11 | 2.01E-01 |
| cg06000029 | 13.23  | 6.51  | 4.20E-02 | 11.05  | 18.39 | 5.48E-01 | 42.60  | 26.98  | 1.14E-01 | 9.92   | 7.44  | 1.83E-01 | 34.49  | 28.62 | 2.28E-01 |
| cg23507834 | -9.96  | 4.90  | 4.20E-02 | -20.32 | 8.88  | 2.21E-02 | -1.42  | 12.56  | 9.10E-01 | -7.09  | 8.27  | 3.91E-01 | -5.56  | 11.18 | 6.19E-01 |
| cg13244000 | 22.86  | 11.24 | 4.20E-02 | 43.35  | 15.60 | 5.46E-03 | 0.38   | 54.42  | 9.94E-01 | 18.76  | 13.42 | 1.62E-01 | -16.20 | 30.38 | 5.94E-01 |
| cg16210497 | 21.04  | 10.35 | 4.20E-02 | 27.24  | 14.25 | 5.59E-02 | -5.96  | 32.79  | 8.56E-01 | 15.88  | 37.19 | 6.69E-01 | 20.42  | 19.02 | 2.83E-01 |
| cg22320183 | 20.10  | 9.89  | 4.20E-02 | 29.55  | 12.98 | 2.29E-02 | 18.14  | 16.10  | 2.60E-01 | -5.66  | 15.98 | 7.23E-01 | 45.27  | 22.22 | 4.17E-02 |
| cg17799760 | -13.79 | 6.78  | 4.20E-02 | -27.13 | 10.55 | 1.01E-02 | -3.54  | 14.04  | 8.01E-01 | 0.53   | 18.80 | 9.77E-01 | -8.13  | 14.38 | 5.72E-01 |
| cg03478249 | 39.20  | 19.28 | 4.20E-02 | 38.69  | 23.33 | 9.73E-02 | 133.45 | 111.07 | 2.30E-01 | 16.31  | 68.30 | 8.11E-01 | 36.00  | 42.38 | 3.96E-01 |
| cg21233057 | -10.99 | 5.41  | 4.20E-02 | -26.48 | 13.76 | 5.42E-02 | -1.52  | 24.13  | 9.50E-01 | -8.72  | 6.42  | 1.74E-01 | -7.43  | 18.49 | 6.88E-01 |
| cg18133905 | -10.16 | 5.00  | 4.21E-02 | -13.60 | 5.66  | 1.62E-02 | 7.86   | 10.11  | 4.37E-01 | -19.53 | 15.69 | 2.13E-01 | -14.04 | 7.37  | 5.68E-02 |
| cg26866325 | -16.78 | 8.25  | 4.21E-02 | -25.10 | 10.36 | 1.54E-02 | 7.24   | 25.65  | 7.78E-01 | 13.41  | 50.06 | 7.89E-01 | -8.33  | 17.04 | 6.25E-01 |
| cg01097384 | 5.90   | 2.90  | 4.21E-02 | 3.82   | 4.29  | 3.74E-01 | 6.33   | 6.17   | 3.05E-01 | 5.42   | 8.33  | 5.16E-01 | 10.43  | 6.47  | 1.07E-01 |
| cg26764019 | 19.75  | 9.71  | 4.21E-02 | -2.35  | 21.58 | 9.13E-01 | 23.25  | 42.03  | 5.80E-01 | 23.37  | 12.79 | 6.76E-02 | 32.91  | 23.77 | 1.66E-01 |
| cg00343312 | 18.15  | 8.93  | 4.21E-02 | 35.28  | 12.52 | 4.84E-03 | -0.03  | 23.46  | 9.99E-01 | 26.61  | 19.94 | 1.82E-01 | 4.69   | 11.81 | 6.91E-01 |
| cg24003560 | -6.37  | 3.13  | 4.21E-02 | -8.86  | 5.06  | 7.98E-02 | -8.69  | 6.47   | 1.79E-01 | -10.95 | 6.84  | 1.10E-01 | 3.28   | 6.22  | 5.98E-01 |
| cg09789173 | 13.88  | 6.83  | 4.21E-02 | 4.78   | 12.77 | 7.08E-01 | 20.99  | 11.77  | 7.46E-02 | 21.11  | 15.29 | 1.67E-01 | 6.98   | 16.21 | 6.67E-01 |
| cg04781796 | -7.26  | 3.57  | 4.21E-02 | -9.41  | 5.15  | 6.80E-02 | -10.53 | 8.06   | 1.91E-01 | -2.81  | 9.97  | 7.78E-01 | -1.61  | 8.10  | 8.42E-01 |
| cg26874999 | 11.90  | 5.85  | 4.21E-02 | 7.55   | 13.59 | 5.78E-01 | 23.84  | 20.49  | 2.45E-01 | 9.16   | 7.10  | 1.97E-01 | 44.22  | 25.55 | 8.35E-02 |
| cg08683147 | -10.21 | 5.02  | 4.21E-02 | -7.02  | 11.98 | 5.58E-01 | -4.04  | 24.17  | 8.67E-01 | -9.30  | 5.99  | 1.21E-01 | -29.34 | 18.10 | 1.05E-01 |

|            |        |       |          |        |       |          |         |        |          |        |       |          |         |       |          |
|------------|--------|-------|----------|--------|-------|----------|---------|--------|----------|--------|-------|----------|---------|-------|----------|
| cg11952340 | 5.07   | 2.49  | 4.21E-02 | 5.31   | 3.47  | 1.25E-01 | 7.62    | 6.43   | 2.35E-01 | 6.24   | 5.33  | 2.42E-01 | -1.74   | 7.44  | 8.15E-01 |
| cg12653146 | 12.92  | 6.35  | 4.21E-02 | 18.74  | 18.74 | 3.17E-01 | 39.59   | 37.99  | 2.97E-01 | 13.20  | 7.07  | 6.17E-02 | -21.09  | 28.88 | 4.65E-01 |
| cg15065854 | 6.31   | 3.10  | 4.21E-02 | 4.01   | 4.18  | 3.37E-01 | 11.33   | 7.28   | 1.19E-01 | 8.01   | 9.77  | 4.12E-01 | 7.36    | 7.58  | 3.32E-01 |
| cg11152829 | 14.20  | 6.98  | 4.21E-02 | 16.84  | 11.64 | 1.48E-01 | 11.36   | 15.31  | 4.58E-01 | 18.91  | 13.64 | 1.66E-01 | 4.80    | 16.95 | 7.77E-01 |
| cg04103862 | 21.19  | 10.43 | 4.21E-02 | 17.71  | 11.53 | 1.24E-01 | -12.04  | 75.32  | 8.73E-01 | 72.13  | 46.61 | 1.22E-01 | 29.57   | 31.09 | 3.42E-01 |
| cg18655369 | 5.52   | 2.71  | 4.21E-02 | 5.00   | 3.28  | 1.28E-01 | 10.34   | 7.07   | 1.43E-01 | 9.62   | 10.21 | 3.46E-01 | -1.07   | 8.65  | 9.02E-01 |
| cg06947106 | 18.41  | 9.06  | 4.21E-02 | 44.80  | 20.79 | 3.12E-02 | -28.30  | 73.61  | 7.01E-01 | 13.01  | 10.68 | 2.24E-01 | 12.97   | 32.69 | 6.92E-01 |
| cg16279290 | 10.25  | 5.04  | 4.21E-02 | 9.69   | 7.20  | 1.78E-01 | 7.12    | 11.96  | 5.52E-01 | 15.96  | 14.88 | 2.83E-01 | 11.07   | 10.84 | 3.07E-01 |
| cg10436594 | -50.94 | 25.06 | 4.21E-02 | -55.15 | 31.61 | 8.10E-02 | -120.49 | 96.94  | 2.14E-01 | -46.72 | 97.10 | 6.30E-01 | -21.46  | 51.40 | 6.76E-01 |
| cg25135145 | 21.44  | 10.55 | 4.21E-02 | 36.87  | 20.74 | 7.55E-02 | 15.39   | 23.46  | 5.12E-01 | 12.19  | 17.77 | 4.93E-01 | 24.07   | 24.39 | 3.24E-01 |
| cg10663628 | -15.10 | 7.43  | 4.21E-02 | -26.42 | 15.63 | 9.09E-02 | -34.52  | 19.36  | 7.46E-02 | -8.12  | 10.56 | 4.42E-01 | -0.18   | 20.48 | 9.93E-01 |
| cg20580294 | 12.45  | 6.12  | 4.21E-02 | 8.62   | 7.28  | 2.36E-01 | -2.41   | 10.59  | 8.20E-01 | 30.81  | 11.91 | 9.70E-03 | 17.05   | 9.74  | 8.00E-02 |
| cg05206832 | 15.31  | 7.53  | 4.21E-02 | 3.94   | 16.11 | 8.07E-01 | 14.59   | 10.95  | 1.83E-01 | 18.95  | 17.36 | 2.75E-01 | 33.17   | 21.76 | 1.27E-01 |
| cg01035812 | 28.20  | 13.88 | 4.21E-02 | 6.57   | 41.13 | 8.73E-01 | 24.64   | 208.75 | 9.06E-01 | 33.57  | 15.33 | 2.86E-02 | -2.39   | 55.42 | 9.66E-01 |
| cg09245582 | 14.82  | 7.29  | 4.21E-02 | 14.37  | 13.48 | 2.86E-01 | 13.80   | 13.03  | 2.90E-01 | 21.44  | 13.74 | 1.19E-01 | 2.25    | 21.75 | 9.18E-01 |
| cg13490227 | 11.94  | 5.88  | 4.21E-02 | 9.29   | 10.81 | 3.90E-01 | 30.43   | 12.11  | 1.20E-02 | 3.53   | 9.52  | 7.11E-01 | 9.07    | 14.40 | 5.29E-01 |
| cg06322412 | -7.69  | 3.78  | 4.21E-02 | -8.17  | 5.65  | 1.48E-01 | -8.62   | 10.11  | 3.94E-01 | -12.45 | 8.60  | 1.48E-01 | -1.85   | 8.13  | 8.20E-01 |
| cg14564722 | -16.38 | 8.06  | 4.21E-02 | -29.03 | 11.31 | 1.03E-02 | 5.39    | 16.84  | 7.49E-01 | -9.46  | 7.02  | 1.78E-01 | -38.53  | 19.28 | 4.57E-02 |
| cg19233472 | -9.90  | 4.87  | 4.21E-02 | -13.47 | 12.45 | 2.79E-01 | -7.02   | 28.63  | 8.06E-01 | -7.25  | 5.66  | 2.00E-01 | -29.66  | 17.67 | 9.33E-02 |
| cg27537203 | 22.56  | 11.10 | 4.21E-02 | -9.87  | 34.92 | 7.77E-01 | 90.02   | 98.15  | 3.59E-01 | 27.19  | 12.54 | 3.02E-02 | 10.80   | 34.62 | 7.55E-01 |
| cg20866075 | 9.03   | 4.45  | 4.21E-02 | 10.45  | 7.38  | 1.57E-01 | 14.67   | 9.15   | 1.09E-01 | 15.13  | 11.23 | 1.78E-01 | -2.44   | 9.00  | 7.86E-01 |
| cg09407122 | 11.83  | 5.82  | 4.22E-02 | 15.69  | 14.05 | 2.64E-01 | 13.25   | 20.54  | 5.19E-01 | 10.10  | 7.10  | 1.55E-01 | 17.02   | 21.24 | 4.23E-01 |
| cg00505318 | -8.27  | 4.07  | 4.22E-02 | -8.63  | 5.56  | 1.20E-01 | -18.52  | 12.30  | 1.32E-01 | -0.28  | 9.88  | 9.78E-01 | -8.51   | 9.49  | 3.70E-01 |
| cg13181974 | 13.13  | 6.46  | 4.22E-02 | 3.30   | 16.59 | 8.42E-01 | 77.48   | 53.42  | 1.47E-01 | 16.25  | 7.52  | 3.07E-02 | -5.40   | 21.01 | 7.97E-01 |
| cg15890754 | 8.84   | 4.35  | 4.22E-02 | 13.54  | 6.06  | 2.56E-02 | 12.03   | 11.06  | 2.77E-01 | 8.18   | 12.12 | 5.00E-01 | -5.14   | 9.67  | 5.95E-01 |
| cg05767633 | -26.14 | 12.86 | 4.22E-02 | -54.05 | 27.04 | 4.56E-02 | -35.48  | 93.47  | 7.04E-01 | -19.79 | 15.68 | 2.07E-01 | 1.03    | 44.98 | 9.82E-01 |
| cg00461642 | 29.48  | 14.51 | 4.22E-02 | 30.25  | 16.13 | 6.08E-02 | -4.62   | 71.97  | 9.49E-01 | 139.09 | 80.90 | 8.56E-02 | 6.14    | 42.21 | 8.84E-01 |
| cg23500931 | -52.45 | 25.82 | 4.22E-02 | -53.55 | 33.00 | 1.05E-01 | 33.77   | 110.39 | 7.60E-01 | 42.56  | 80.02 | 5.95E-01 | -101.85 | 47.86 | 3.33E-02 |
| cg01632803 | 9.52   | 4.68  | 4.22E-02 | 8.79   | 7.82  | 2.61E-01 | -0.35   | 10.69  | 9.74E-01 | 10.16  | 7.85  | 1.96E-01 | 30.08   | 15.30 | 4.94E-02 |
| cg08274369 | 39.96  | 19.67 | 4.22E-02 | 9.10   | 58.79 | 8.77E-01 | 9.04    | 265.03 | 9.73E-01 | 43.27  | 21.81 | 4.73E-02 | 53.39   | 74.68 | 4.75E-01 |
| cg13743300 | -24.43 | 12.02 | 4.22E-02 | -16.48 | 16.48 | 3.17E-01 | -45.40  | 31.89  | 1.55E-01 | -21.53 | 34.60 | 5.34E-01 | -32.26  | 26.58 | 2.25E-01 |
| cg22500518 | 12.59  | 6.20  | 4.22E-02 | 7.04   | 6.90  | 3.08E-01 | 35.04   | 13.75  | 1.08E-02 | 1.47   | 13.73 | 9.15E-01 | 15.07   | 11.58 | 1.93E-01 |
| cg13307058 | 9.78   | 4.81  | 4.22E-02 | 12.21  | 7.38  | 9.83E-02 | 10.61   | 9.21   | 2.50E-01 | 5.79   | 12.34 | 6.39E-01 | 5.43    | 12.44 | 6.63E-01 |
| cg08722383 | 7.09   | 3.49  | 4.22E-02 | 7.57   | 4.76  | 1.12E-01 | 3.58    | 8.31   | 6.67E-01 | 12.43  | 8.37  | 1.37E-01 | 2.07    | 10.36 | 8.42E-01 |
| cg14342532 | 7.27   | 3.58  | 4.22E-02 | 5.38   | 4.54  | 2.36E-01 | 14.99   | 8.57   | 8.01E-02 | 8.87   | 15.80 | 5.74E-01 | 5.61    | 9.14  | 5.39E-01 |

|            |        |       |          |        |       |          |        |        |          |         |       |          |        |       |          |
|------------|--------|-------|----------|--------|-------|----------|--------|--------|----------|---------|-------|----------|--------|-------|----------|
| cg22217660 | 14.85  | 7.31  | 4.22E-02 | 17.23  | 13.11 | 1.89E-01 | 24.19  | 15.65  | 1.22E-01 | 12.09   | 14.24 | 3.96E-01 | 4.96   | 16.04 | 7.57E-01 |
| cg16791721 | 30.87  | 15.19 | 4.22E-02 | 84.33  | 36.70 | 2.16E-02 | -33.17 | 74.69  | 6.57E-01 | 14.38   | 15.87 | 3.65E-01 | 38.17  | 20.78 | 6.62E-02 |
| cg07505901 | -9.68  | 4.77  | 4.22E-02 | -3.29  | 9.83  | 7.37E-01 | 10.27  | 16.80  | 5.41E-01 | -15.46  | 6.24  | 1.32E-02 | -7.07  | 15.02 | 6.38E-01 |
| cg10316291 | 8.38   | 4.12  | 4.22E-02 | 16.42  | 9.53  | 8.49E-02 | -2.91  | 9.40   | 7.57E-01 | 9.16    | 5.66  | 1.05E-01 | 11.17  | 13.81 | 4.19E-01 |
| cg09900758 | 23.99  | 11.81 | 4.22E-02 | 35.33  | 17.41 | 4.24E-02 | -11.73 | 21.81  | 5.91E-01 | 23.18   | 13.93 | 9.60E-02 | 58.23  | 29.21 | 4.62E-02 |
| cg21012788 | -21.88 | 10.77 | 4.22E-02 | -37.44 | 11.22 | 8.46E-04 | -0.56  | 34.47  | 9.87E-01 | -7.31   | 33.82 | 8.29E-01 | -1.26  | 19.14 | 9.47E-01 |
| cg08571347 | -9.41  | 4.63  | 4.22E-02 | -2.99  | 12.29 | 8.08E-01 | -33.64 | 23.31  | 1.49E-01 | -7.86   | 5.38  | 1.44E-01 | -23.80 | 16.72 | 1.55E-01 |
| cg23478293 | 9.25   | 4.55  | 4.22E-02 | 4.56   | 6.27  | 4.67E-01 | 16.01  | 11.08  | 1.49E-01 | 31.40   | 29.42 | 2.86E-01 | 12.09  | 8.60  | 1.59E-01 |
| cg23904247 | 31.45  | 15.48 | 4.22E-02 | 31.36  | 18.62 | 9.21E-02 | -6.95  | 47.01  | 8.82E-01 | 13.74   | 71.96 | 8.49E-01 | 64.24  | 39.47 | 1.04E-01 |
| cg09325679 | -45.53 | 22.41 | 4.22E-02 | -20.72 | 29.59 | 4.84E-01 | 76.65  | 128.90 | 5.52E-01 | -111.56 | 56.62 | 4.88E-02 | -63.75 | 37.25 | 8.70E-02 |
| cg00321007 | 29.43  | 14.49 | 4.22E-02 | 17.28  | 17.82 | 3.32E-01 | 14.53  | 21.74  | 5.04E-01 | 15.08   | 16.70 | 3.67E-01 | 81.76  | 23.70 | 5.61E-04 |
| cg20701531 | -14.63 | 7.20  | 4.22E-02 | -25.07 | 11.13 | 2.43E-02 | -0.11  | 18.43  | 9.95E-01 | -4.53   | 17.64 | 7.97E-01 | -12.85 | 14.07 | 3.61E-01 |
| cg16077055 | -7.81  | 3.84  | 4.22E-02 | -21.34 | 10.81 | 4.83E-02 | -19.35 | 17.54  | 2.70E-01 | -4.02   | 4.51  | 3.73E-01 | -12.58 | 12.12 | 2.99E-01 |
| cg01092108 | -7.27  | 3.58  | 4.22E-02 | -8.12  | 6.08  | 1.82E-01 | -22.52 | 9.89   | 2.27E-02 | -2.44   | 4.97  | 6.24E-01 | -6.58  | 8.89  | 4.59E-01 |
| cg09546929 | -15.93 | 7.84  | 4.22E-02 | -11.35 | 16.17 | 4.83E-01 | 5.19   | 29.46  | 8.60E-01 | -15.41  | 10.40 | 1.38E-01 | -38.90 | 22.18 | 7.95E-02 |
| cg05950509 | -17.90 | 8.81  | 4.22E-02 | -44.42 | 15.18 | 3.42E-03 | -16.92 | 19.44  | 3.84E-01 | -10.47  | 8.36  | 2.10E-01 | -1.82  | 18.97 | 9.24E-01 |
| cg24505122 | 13.18  | 6.49  | 4.22E-02 | 14.35  | 16.33 | 3.80E-01 | 33.84  | 24.80  | 1.72E-01 | 10.13   | 7.77  | 1.92E-01 | 20.01  | 23.40 | 3.92E-01 |
| cg11814564 | -16.73 | 8.24  | 4.22E-02 | -30.96 | 21.95 | 1.58E-01 | 5.97   | 36.80  | 8.71E-01 | -14.91  | 9.64  | 1.22E-01 | -22.57 | 29.36 | 4.42E-01 |
| cg17162271 | 48.51  | 23.88 | 4.22E-02 | -1.80  | 66.10 | 9.78E-01 | -59.34 | 315.77 | 8.51E-01 | 68.92   | 27.18 | 1.12E-02 | -44.69 | 78.72 | 5.70E-01 |
| cg03308986 | 27.10  | 13.34 | 4.22E-02 | 29.81  | 20.59 | 1.48E-01 | 47.80  | 29.85  | 1.09E-01 | 18.18   | 31.00 | 5.58E-01 | 8.55   | 30.17 | 7.77E-01 |
| cg06977831 | -10.30 | 5.07  | 4.22E-02 | -15.21 | 10.76 | 1.57E-01 | -28.39 | 22.39  | 2.05E-01 | -8.44   | 6.63  | 2.03E-01 | -3.74  | 13.45 | 7.81E-01 |
| cg08370996 | 15.62  | 7.69  | 4.22E-02 | 21.62  | 11.70 | 6.46E-02 | 11.77  | 19.21  | 5.40E-01 | 33.07   | 18.53 | 7.44E-02 | -5.52  | 15.84 | 7.28E-01 |
| cg21887246 | 23.57  | 11.61 | 4.22E-02 | -0.88  | 27.65 | 9.75E-01 | 29.01  | 95.93  | 7.62E-01 | 27.74   | 13.72 | 4.32E-02 | 36.88  | 37.91 | 3.31E-01 |
| cg18958339 | -69.78 | 34.36 | 4.22E-02 | -73.00 | 47.05 | 1.21E-01 | 40.08  | 173.90 | 8.18E-01 | -146.64 | 77.03 | 5.70E-02 | -14.18 | 71.83 | 8.44E-01 |
| cg10943497 | 23.30  | 11.47 | 4.23E-02 | 3.30   | 11.35 | 7.71E-01 | 50.14  | 19.30  | 9.39E-03 | 36.18   | 30.10 | 2.29E-01 | 24.27  | 17.49 | 1.65E-01 |
| cg08897688 | -8.76  | 4.31  | 4.23E-02 | -15.72 | 11.09 | 1.56E-01 | 5.60   | 24.03  | 8.16E-01 | -6.73   | 5.03  | 1.81E-01 | -19.81 | 15.12 | 1.90E-01 |
| cg23875391 | -9.05  | 4.45  | 4.23E-02 | -18.18 | 10.95 | 9.67E-02 | 0.88   | 14.36  | 9.51E-01 | -8.05   | 5.51  | 1.44E-01 | -10.12 | 15.27 | 5.08E-01 |
| cg14802355 | -8.80  | 4.33  | 4.23E-02 | -15.74 | 7.54  | 3.68E-02 | -13.47 | 15.29  | 3.78E-01 | -4.31   | 6.38  | 4.99E-01 | -4.12  | 12.13 | 7.34E-01 |
| cg05612346 | 25.00  | 12.31 | 4.23E-02 | 40.51  | 17.34 | 1.95E-02 | 14.25  | 22.82  | 5.32E-01 | 0.37    | 17.67 | 9.83E-01 | 56.64  | 27.84 | 4.19E-02 |
| cg00547480 | 8.30   | 4.09  | 4.23E-02 | 12.51  | 5.54  | 2.39E-02 | 9.67   | 11.93  | 4.18E-01 | 3.38    | 10.66 | 7.51E-01 | -0.72  | 9.32  | 9.39E-01 |
| cg09572175 | 21.35  | 10.51 | 4.23E-02 | 4.60   | 37.72 | 9.03E-01 | 132.74 | 157.29 | 3.99E-01 | 20.82   | 11.31 | 6.57E-02 | 45.03  | 45.45 | 3.22E-01 |
| cg19138905 | -16.73 | 8.24  | 4.23E-02 | -23.01 | 18.83 | 2.22E-01 | -73.00 | 38.87  | 6.03E-02 | -9.59   | 10.22 | 3.48E-01 | -24.74 | 24.44 | 3.11E-01 |
| cg06289479 | 17.07  | 8.41  | 4.23E-02 | -2.42  | 22.94 | 9.16E-01 | 2.84   | 95.18  | 9.76E-01 | 18.69   | 9.46  | 4.83E-02 | 38.09  | 32.00 | 2.34E-01 |
| cg27171509 | -15.70 | 7.73  | 4.23E-02 | -20.29 | 9.54  | 3.33E-02 | -4.51  | 14.74  | 7.60E-01 | -41.46  | 17.14 | 1.56E-02 | -1.95  | 12.56 | 8.76E-01 |
| cg27510503 | 9.08   | 4.47  | 4.23E-02 | 10.40  | 7.85  | 1.85E-01 | -1.63  | 9.83   | 8.69E-01 | 13.58   | 10.85 | 2.11E-01 | 12.50  | 8.17  | 1.26E-01 |

|            |        |       |          |         |       |          |         |        |          |        |       |          |        |       |          |
|------------|--------|-------|----------|---------|-------|----------|---------|--------|----------|--------|-------|----------|--------|-------|----------|
| cg00028013 | 7.55   | 3.72  | 4.23E-02 | 8.36    | 4.98  | 9.29E-02 | 8.57    | 8.68   | 3.24E-01 | 8.37   | 11.38 | 4.62E-01 | 2.75   | 9.58  | 7.74E-01 |
| cg27088038 | 14.17  | 6.98  | 4.23E-02 | 23.86   | 11.14 | 3.22E-02 | -9.98   | 14.51  | 4.92E-01 | 19.22  | 8.07  | 1.72E-02 | 10.13  | 21.89 | 6.43E-01 |
| cg27622701 | -11.05 | 5.44  | 4.23E-02 | -16.48  | 9.10  | 7.00E-02 | -8.71   | 11.57  | 4.51E-01 | -1.68  | 12.54 | 8.94E-01 | -12.53 | 11.31 | 2.68E-01 |
| cg23376501 | -7.40  | 3.64  | 4.23E-02 | -8.18   | 6.75  | 2.26E-01 | -10.30  | 7.67   | 1.79E-01 | -5.68  | 7.06  | 4.21E-01 | -5.43  | 7.83  | 4.88E-01 |
| cg01073575 | -53.30 | 26.25 | 4.23E-02 | -79.57  | 32.71 | 1.50E-02 | -147.49 | 150.09 | 3.26E-01 | -27.94 | 84.59 | 7.41E-01 | 21.28  | 54.47 | 6.96E-01 |
| cg23642827 | -8.52  | 4.19  | 4.23E-02 | -12.20  | 8.88  | 1.70E-01 | -4.72   | 16.71  | 7.78E-01 | -9.59  | 5.70  | 9.22E-02 | -1.75  | 10.11 | 8.63E-01 |
| cg16308270 | -9.10  | 4.48  | 4.23E-02 | -6.14   | 8.00  | 4.43E-01 | -5.24   | 11.21  | 6.40E-01 | -12.46 | 7.31  | 8.84E-02 | -10.97 | 11.52 | 3.41E-01 |
| cg03701992 | 9.76   | 4.81  | 4.23E-02 | 21.93   | 10.46 | 3.60E-02 | 16.81   | 12.44  | 1.77E-01 | 8.32   | 8.67  | 3.37E-01 | 0.28   | 8.29  | 9.73E-01 |
| cg16207001 | 19.97  | 9.83  | 4.23E-02 | 30.73   | 17.92 | 8.64E-02 | 29.51   | 19.79  | 1.36E-01 | 12.00  | 18.09 | 5.07E-01 | -0.73  | 24.85 | 9.77E-01 |
| cg04466484 | 12.73  | 6.27  | 4.23E-02 | 15.09   | 8.55  | 7.76E-02 | 32.60   | 15.12  | 3.11E-02 | -2.16  | 11.10 | 8.45E-01 | 12.28  | 13.29 | 3.55E-01 |
| cg07838388 | -17.47 | 8.60  | 4.23E-02 | -15.43  | 22.31 | 4.89E-01 | 26.70   | 67.82  | 6.94E-01 | -14.92 | 10.42 | 1.52E-01 | -35.33 | 21.93 | 1.07E-01 |
| cg07469757 | -18.00 | 8.86  | 4.23E-02 | 2.58    | 17.72 | 8.84E-01 | -4.67   | 28.11  | 8.68E-01 | -28.43 | 12.59 | 2.39E-02 | -26.41 | 22.54 | 2.41E-01 |
| cg06287303 | -10.10 | 4.98  | 4.23E-02 | -20.67  | 13.24 | 1.19E-01 | -35.36  | 22.50  | 1.16E-01 | -6.96  | 5.78  | 2.28E-01 | -4.26  | 19.12 | 8.24E-01 |
| cg09776314 | -21.35 | 10.51 | 4.23E-02 | -26.77  | 24.25 | 2.70E-01 | 44.19   | 48.26  | 3.60E-01 | -24.40 | 12.93 | 5.91E-02 | -22.07 | 32.77 | 5.01E-01 |
| cg24946729 | -6.90  | 3.40  | 4.23E-02 | -10.46  | 6.87  | 1.28E-01 | -2.28   | 7.60   | 7.64E-01 | -8.54  | 5.36  | 1.11E-01 | -2.94  | 8.73  | 7.36E-01 |
| cg19182908 | -25.35 | 12.49 | 4.23E-02 | -42.20  | 16.99 | 1.30E-02 | 30.03   | 41.14  | 4.66E-01 | 2.60   | 66.74 | 9.69E-01 | -18.63 | 20.03 | 3.52E-01 |
| cg17185705 | 14.77  | 7.27  | 4.23E-02 | 25.30   | 13.72 | 6.52E-02 | 0.72    | 23.05  | 9.75E-01 | 11.10  | 10.04 | 2.69E-01 | 18.56  | 23.57 | 4.31E-01 |
| cg23518655 | -6.41  | 3.16  | 4.23E-02 | -7.84   | 5.02  | 1.18E-01 | -6.56   | 7.41   | 3.76E-01 | -6.52  | 7.39  | 3.78E-01 | -3.86  | 6.46  | 5.50E-01 |
| cg06193239 | 7.35   | 3.62  | 4.23E-02 | 5.69    | 5.10  | 2.64E-01 | 6.30    | 8.51   | 4.59E-01 | 22.01  | 12.71 | 8.33E-02 | 6.68   | 7.51  | 3.74E-01 |
| cg15707833 | -11.32 | 5.57  | 4.23E-02 | -12.31  | 9.77  | 2.08E-01 | -7.25   | 13.44  | 5.90E-01 | -11.76 | 12.00 | 3.27E-01 | -12.29 | 10.40 | 2.37E-01 |
| cg09863094 | -39.49 | 19.45 | 4.23E-02 | -36.00  | 26.62 | 1.76E-01 | -14.12  | 84.05  | 8.67E-01 | -27.75 | 45.89 | 5.45E-01 | -62.36 | 40.29 | 1.22E-01 |
| cg01877778 | -18.19 | 8.96  | 4.23E-02 | -15.39  | 12.91 | 2.33E-01 | -36.82  | 33.91  | 2.78E-01 | -5.75  | 23.70 | 8.08E-01 | -24.15 | 16.20 | 1.36E-01 |
| cg26079857 | -34.83 | 17.15 | 4.23E-02 | -27.80  | 17.19 | 1.06E-01 | 12.24   | 29.05  | 6.73E-01 | -80.78 | 25.59 | 1.60E-03 | -39.87 | 26.88 | 1.38E-01 |
| cg23288838 | -7.53  | 3.71  | 4.23E-02 | -7.86   | 5.26  | 1.35E-01 | -19.44  | 9.33   | 3.72E-02 | 4.01   | 11.52 | 7.28E-01 | -4.00  | 7.58  | 5.97E-01 |
| cg05941025 | -11.00 | 5.42  | 4.23E-02 | -8.13   | 7.59  | 2.85E-01 | -2.75   | 13.10  | 8.34E-01 | -33.13 | 16.00 | 3.83E-02 | -12.63 | 11.96 | 2.91E-01 |
| cg22454005 | 16.25  | 8.01  | 4.23E-02 | 21.65   | 17.16 | 2.07E-01 | 22.18   | 16.65  | 1.83E-01 | 9.83   | 12.28 | 4.24E-01 | 17.74  | 22.54 | 4.31E-01 |
| cg18457613 | -17.71 | 8.72  | 4.23E-02 | -8.08   | 19.85 | 6.84E-01 | 4.41    | 21.54  | 8.38E-01 | -25.24 | 11.90 | 3.39E-02 | -31.36 | 26.84 | 2.43E-01 |
| cg20547031 | -6.03  | 2.97  | 4.23E-02 | -12.25  | 5.15  | 1.73E-02 | -2.31   | 6.11   | 7.05E-01 | -5.87  | 5.78  | 3.10E-01 | 0.89   | 7.29  | 9.03E-01 |
| cg00357593 | 27.81  | 13.70 | 4.23E-02 | 18.53   | 21.44 | 3.87E-01 | -13.32  | 37.53  | 7.23E-01 | 54.03  | 27.18 | 4.68E-02 | 40.59  | 30.30 | 1.80E-01 |
| cg19097494 | -17.71 | 8.72  | 4.23E-02 | -5.41   | 22.02 | 8.06E-01 | -23.07  | 36.87  | 5.31E-01 | -18.32 | 10.35 | 7.68E-02 | -33.21 | 31.40 | 2.90E-01 |
| cg21167985 | 4.59   | 2.26  | 4.23E-02 | 3.61    | 2.59  | 1.64E-01 | 11.00   | 4.85   | 2.35E-02 | 7.32   | 6.15  | 2.33E-01 | -1.48  | 5.08  | 7.70E-01 |
| cg22589728 | 7.81   | 3.85  | 4.23E-02 | 7.62    | 5.13  | 1.37E-01 | 13.83   | 10.01  | 1.67E-01 | 7.10   | 14.74 | 6.30E-01 | 4.50   | 8.18  | 5.83E-01 |
| cg25117976 | -34.82 | 17.15 | 4.23E-02 | -108.82 | 53.86 | 4.34E-02 | -202.08 | 216.13 | 3.50E-01 | -24.69 | 19.21 | 1.99E-01 | -29.81 | 55.59 | 5.92E-01 |
| cg14769792 | -11.75 | 5.79  | 4.23E-02 | -24.90  | 10.80 | 2.11E-02 | 5.17    | 20.35  | 7.99E-01 | -8.88  | 8.04  | 2.69E-01 | -3.60  | 17.23 | 8.35E-01 |
| cg25992610 | 45.59  | 22.46 | 4.23E-02 | 100.55  | 45.46 | 2.70E-02 | -126.70 | 181.83 | 4.86E-01 | 26.67  | 13.81 | 5.34E-02 | 79.46  | 56.28 | 1.58E-01 |

|            |        |       |          |        |       |          |         |        |          |        |       |          |        |       |          |
|------------|--------|-------|----------|--------|-------|----------|---------|--------|----------|--------|-------|----------|--------|-------|----------|
| cg17074863 | 15.20  | 7.49  | 4.23E-02 | 19.80  | 10.09 | 4.98E-02 | 3.09    | 19.35  | 8.73E-01 | 8.66   | 23.35 | 7.11E-01 | 14.95  | 16.84 | 3.74E-01 |
| cg25119155 | -10.98 | 5.41  | 4.23E-02 | -27.01 | 11.55 | 1.93E-02 | -3.76   | 21.29  | 8.60E-01 | -7.19  | 7.05  | 3.08E-01 | -4.58  | 15.08 | 7.61E-01 |
| cg05006304 | -12.43 | 6.12  | 4.23E-02 | -9.70  | 12.96 | 4.54E-01 | -4.39   | 14.62  | 7.64E-01 | -12.18 | 9.43  | 1.97E-01 | -24.25 | 14.44 | 9.30E-02 |
| cg09976157 | 11.56  | 5.69  | 4.23E-02 | 4.01   | 13.43 | 7.65E-01 | -3.45   | 18.78  | 8.54E-01 | 15.66  | 7.04  | 2.61E-02 | 12.24  | 20.87 | 5.57E-01 |
| cg11965409 | -12.16 | 5.99  | 4.23E-02 | -14.12 | 10.57 | 1.82E-01 | -20.79  | 15.97  | 1.93E-01 | -11.19 | 9.91  | 2.59E-01 | -3.53  | 14.44 | 8.07E-01 |
| cg23071690 | 18.62  | 9.17  | 4.24E-02 | -2.85  | 15.61 | 8.55E-01 | 29.54   | 21.28  | 1.65E-01 | 29.99  | 19.56 | 1.25E-01 | 30.15  | 18.36 | 1.01E-01 |
| cg17783317 | 4.72   | 2.33  | 4.24E-02 | 3.92   | 3.52  | 2.65E-01 | 7.91    | 6.07   | 1.93E-01 | 10.24  | 5.34  | 5.54E-02 | -0.40  | 4.88  | 9.35E-01 |
| cg04864990 | 20.96  | 10.33 | 4.24E-02 | 38.74  | 17.73 | 2.89E-02 | 9.67    | 20.94  | 6.44E-01 | 5.82   | 21.32 | 7.85E-01 | 22.42  | 24.13 | 3.53E-01 |
| cg04774711 | 17.53  | 8.63  | 4.24E-02 | 20.22  | 12.62 | 1.09E-01 | 9.02    | 23.92  | 7.06E-01 | 22.19  | 26.09 | 3.95E-01 | 15.26  | 15.97 | 3.40E-01 |
| cg03709938 | 18.28  | 9.01  | 4.24E-02 | 21.05  | 10.92 | 5.39E-02 | 58.93   | 25.84  | 2.26E-02 | 11.64  | 20.46 | 5.70E-01 | 3.01   | 14.21 | 8.32E-01 |
| cg19597382 | 15.14  | 7.46  | 4.24E-02 | 17.94  | 22.75 | 4.30E-01 | 15.79   | 36.74  | 6.67E-01 | 20.69  | 9.46  | 2.87E-02 | -1.34  | 15.59 | 9.32E-01 |
| cg06233135 | -19.08 | 9.40  | 4.24E-02 | -41.62 | 11.48 | 2.90E-04 | -16.09  | 22.61  | 4.77E-01 | -7.87  | 7.87  | 3.17E-01 | -9.68  | 16.02 | 5.46E-01 |
| cg17654091 | -15.70 | 7.73  | 4.24E-02 | -11.42 | 10.99 | 2.99E-01 | -31.29  | 18.83  | 9.67E-02 | -13.48 | 27.40 | 6.23E-01 | -14.40 | 15.27 | 3.46E-01 |
| cg16700000 | 13.27  | 6.54  | 4.24E-02 | 16.14  | 20.65 | 4.35E-01 | 5.28    | 22.12  | 8.11E-01 | 13.95  | 9.26  | 1.32E-01 | 13.49  | 11.66 | 2.47E-01 |
| cg16189160 | 19.59  | 9.65  | 4.24E-02 | -7.66  | 30.26 | 8.00E-01 | 82.79   | 125.32 | 5.09E-01 | 24.20  | 10.58 | 2.21E-02 | -4.64  | 39.55 | 9.07E-01 |
| cg11682012 | -23.69 | 11.67 | 4.24E-02 | -31.45 | 13.08 | 1.62E-02 | 39.35   | 68.42  | 5.65E-01 | -27.25 | 81.13 | 7.37E-01 | 5.03   | 29.76 | 8.66E-01 |
| cg05919360 | 14.66  | 7.22  | 4.24E-02 | 19.35  | 14.19 | 1.73E-01 | 9.00    | 45.49  | 8.43E-01 | 15.65  | 11.05 | 1.57E-01 | 9.48   | 13.43 | 4.80E-01 |
| cg18680788 | 14.83  | 7.31  | 4.24E-02 | 24.83  | 28.09 | 3.77E-01 | 148.57  | 95.39  | 1.19E-01 | 12.74  | 7.85  | 1.05E-01 | 20.71  | 29.73 | 4.86E-01 |
| cg12209946 | 4.44   | 2.19  | 4.24E-02 | 5.20   | 3.01  | 8.36E-02 | 7.18    | 5.14   | 1.63E-01 | 2.10   | 5.06  | 6.78E-01 | -0.06  | 6.83  | 9.93E-01 |
| cg16011258 | 45.39  | 22.36 | 4.24E-02 | 53.36  | 38.35 | 1.64E-01 | -183.17 | 194.67 | 3.47E-01 | 64.28  | 21.78 | 3.16E-03 | -22.53 | 54.85 | 6.81E-01 |
| cg22635491 | 13.50  | 6.65  | 4.24E-02 | 35.27  | 17.56 | 4.46E-02 | 34.14   | 23.94  | 1.54E-01 | 8.74   | 8.34  | 2.94E-01 | 2.91   | 16.21 | 8.57E-01 |
| cg06335867 | 8.10   | 3.99  | 4.24E-02 | 10.79  | 7.03  | 1.25E-01 | 9.03    | 8.71   | 3.00E-01 | 13.77  | 8.80  | 1.18E-01 | -0.40  | 7.79  | 9.59E-01 |
| cg07068616 | 19.45  | 9.58  | 4.24E-02 | 10.58  | 12.48 | 3.97E-01 | 11.88   | 55.81  | 8.31E-01 | 108.07 | 69.29 | 1.19E-01 | 29.82  | 15.93 | 6.12E-02 |
| cg16492584 | 11.51  | 5.67  | 4.24E-02 | 13.07  | 13.88 | 3.46E-01 | -23.73  | 25.53  | 3.53E-01 | 12.74  | 6.76  | 5.97E-02 | 19.04  | 19.90 | 3.39E-01 |
| cg16316624 | -9.64  | 4.75  | 4.24E-02 | -9.55  | 7.33  | 1.92E-01 | -3.41   | 12.60  | 7.87E-01 | -3.31  | 6.31  | 6.00E-01 | -25.08 | 9.46  | 8.01E-03 |
| cg16649888 | 9.97   | 4.91  | 4.24E-02 | 16.50  | 14.65 | 2.60E-01 | -10.22  | 29.93  | 7.33E-01 | 9.80   | 5.52  | 7.61E-02 | 9.21   | 18.70 | 6.22E-01 |
| cg02566159 | -29.05 | 14.31 | 4.24E-02 | -50.94 | 25.06 | 4.21E-02 | -41.05  | 102.03 | 6.87E-01 | -25.59 | 20.97 | 2.22E-01 | 1.55   | 32.98 | 9.62E-01 |
| cg17060339 | -33.15 | 16.33 | 4.24E-02 | -43.49 | 21.89 | 4.69E-02 | -54.24  | 41.53  | 1.92E-01 | 16.58  | 61.26 | 7.87E-01 | -7.92  | 35.03 | 8.21E-01 |
| cg20475718 | -7.83  | 3.86  | 4.24E-02 | -9.25  | 9.73  | 3.42E-01 | 0.30    | 10.85  | 9.78E-01 | -6.52  | 5.06  | 1.98E-01 | -19.35 | 10.46 | 6.43E-02 |
| cg09168153 | 11.96  | 5.89  | 4.24E-02 | 15.42  | 8.99  | 8.64E-02 | 24.71   | 17.33  | 1.54E-01 | 3.10   | 11.14 | 7.81E-01 | 9.21   | 14.07 | 5.13E-01 |
| cg03935448 | -9.84  | 4.85  | 4.24E-02 | -15.97 | 9.78  | 1.02E-01 | 2.98    | 15.68  | 8.50E-01 | -8.85  | 6.65  | 1.83E-01 | -11.81 | 13.65 | 3.87E-01 |
| cg20375320 | 23.06  | 11.36 | 4.24E-02 | 35.83  | 15.88 | 2.41E-02 | 24.68   | 24.90  | 3.21E-01 | 24.35  | 33.85 | 4.72E-01 | -18.91 | 27.77 | 4.96E-01 |
| cg12081325 | -7.55  | 3.72  | 4.24E-02 | -7.30  | 5.51  | 1.85E-01 | -2.95   | 8.22   | 7.19E-01 | -10.05 | 10.12 | 3.21E-01 | -11.07 | 8.24  | 1.79E-01 |
| cg06889086 | -7.78  | 3.84  | 4.24E-02 | -8.81  | 5.69  | 1.22E-01 | -9.23   | 10.27  | 3.68E-01 | -3.33  | 8.97  | 7.10E-01 | -8.44  | 8.12  | 2.99E-01 |
| cg12234272 | -12.86 | 6.34  | 4.24E-02 | -18.09 | 10.81 | 9.45E-02 | -11.37  | 14.59  | 4.36E-01 | -16.83 | 13.52 | 2.13E-01 | -3.24  | 12.72 | 7.99E-01 |

|            |        |       |          |        |       |          |         |        |          |         |       |          |        |       |          |
|------------|--------|-------|----------|--------|-------|----------|---------|--------|----------|---------|-------|----------|--------|-------|----------|
| cg10223225 | 19.96  | 9.84  | 4.24E-02 | 54.99  | 22.42 | 1.42E-02 | 17.33   | 32.07  | 5.89E-01 | 7.61    | 9.48  | 4.22E-01 | 23.26  | 16.77 | 1.65E-01 |
| cg11771602 | 8.11   | 4.00  | 4.24E-02 | 5.99   | 5.47  | 2.74E-01 | 17.20   | 8.79   | 5.05E-02 | 4.81    | 12.13 | 6.92E-01 | 5.57   | 10.29 | 5.89E-01 |
| cg13974765 | 19.33  | 9.53  | 4.24E-02 | 31.50  | 18.37 | 8.63E-02 | 15.04   | 20.94  | 4.73E-01 | 9.87    | 15.04 | 5.12E-01 | 30.85  | 27.21 | 2.57E-01 |
| cg03001457 | 30.37  | 14.97 | 4.24E-02 | 55.08  | 43.08 | 2.01E-01 | -136.53 | 147.20 | 3.54E-01 | 33.74   | 16.73 | 4.37E-02 | -27.41 | 57.19 | 6.32E-01 |
| cg04707348 | 70.47  | 34.73 | 4.24E-02 | 88.43  | 51.88 | 8.83E-02 | 172.81  | 127.68 | 1.76E-01 | 52.38   | 79.52 | 5.10E-01 | 28.10  | 64.81 | 6.65E-01 |
| cg13278478 | 9.11   | 4.49  | 4.24E-02 | 4.05   | 6.63  | 5.41E-01 | 17.66   | 9.37   | 5.96E-02 | 12.23   | 13.84 | 3.77E-01 | 9.21   | 9.83  | 3.49E-01 |
| cg16030878 | 8.18   | 4.03  | 4.25E-02 | 8.76   | 5.12  | 8.73E-02 | 4.23    | 11.63  | 7.16E-01 | 14.72   | 13.51 | 2.76E-01 | 5.45   | 9.73  | 5.75E-01 |
| cg11803843 | -48.61 | 23.96 | 4.25E-02 | -36.10 | 32.35 | 2.64E-01 | 97.97   | 164.55 | 5.52E-01 | -105.09 | 55.68 | 5.91E-02 | -46.64 | 48.40 | 3.35E-01 |
| cg24640735 | -11.01 | 5.42  | 4.25E-02 | -9.40  | 9.50  | 3.22E-01 | 0.23    | 13.29  | 9.86E-01 | -16.38  | 8.74  | 6.10E-02 | -13.71 | 15.54 | 3.78E-01 |
| cg14084896 | -10.60 | 5.22  | 4.25E-02 | -21.25 | 10.28 | 3.88E-02 | 14.10   | 15.37  | 3.59E-01 | -10.65  | 5.30  | 4.44E-02 | -12.73 | 12.81 | 3.20E-01 |
| cg07393369 | 9.32   | 4.60  | 4.25E-02 | 15.57  | 6.36  | 1.43E-02 | -0.30   | 10.38  | 9.77E-01 | 4.97    | 13.54 | 7.14E-01 | 4.07   | 11.28 | 7.18E-01 |
| cg20292547 | 17.49  | 8.62  | 4.25E-02 | 30.80  | 19.80 | 1.20E-01 | 42.25   | 27.26  | 1.21E-01 | 18.31   | 11.80 | 1.21E-01 | -7.05  | 18.26 | 7.00E-01 |
| cg21301805 | 7.19   | 3.54  | 4.25E-02 | 7.56   | 4.90  | 1.23E-01 | 5.34    | 7.39   | 4.70E-01 | 32.55   | 20.96 | 1.20E-01 | 4.95   | 7.58  | 5.14E-01 |
| cg27336439 | 9.50   | 4.68  | 4.25E-02 | 12.39  | 5.44  | 2.28E-02 | -3.83   | 9.14   | 6.75E-01 | 6.38    | 7.61  | 4.02E-01 | 23.11  | 10.03 | 2.12E-02 |
| cg27257137 | -16.54 | 8.15  | 4.25E-02 | -25.70 | 11.51 | 2.56E-02 | -26.05  | 17.52  | 1.37E-01 | 15.94   | 22.19 | 4.73E-01 | -9.60  | 15.96 | 5.48E-01 |
| cg19719930 | -8.71  | 4.29  | 4.25E-02 | -8.44  | 6.90  | 2.21E-01 | -5.02   | 11.23  | 6.55E-01 | -19.28  | 7.98  | 1.56E-02 | 1.29   | 8.79  | 8.83E-01 |
| cg24182963 | 32.95  | 16.24 | 4.25E-02 | 41.01  | 55.20 | 4.58E-01 | -267.34 | 220.07 | 2.24E-01 | 31.13   | 17.83 | 8.08E-02 | 64.37  | 58.15 | 2.68E-01 |
| cg08207660 | 22.56  | 11.12 | 4.25E-02 | 37.41  | 19.79 | 5.87E-02 | 14.51   | 20.45  | 4.78E-01 | 3.46    | 24.71 | 8.89E-01 | 30.90  | 25.75 | 2.30E-01 |
| cg13724496 | 12.58  | 6.20  | 4.25E-02 | -9.01  | 25.06 | 7.19E-01 | 48.80   | 70.19  | 4.87E-01 | 15.00   | 6.74  | 2.59E-02 | 0.43   | 21.52 | 9.84E-01 |
| cg21280451 | 18.75  | 9.24  | 4.25E-02 | 11.65  | 19.75 | 5.55E-01 | 7.60    | 38.97  | 8.45E-01 | 15.52   | 12.03 | 1.97E-01 | 48.99  | 25.15 | 5.14E-02 |
| cg26976112 | 14.29  | 7.04  | 4.25E-02 | -0.88  | 18.84 | 9.63E-01 | 28.39   | 31.94  | 3.74E-01 | 19.20   | 8.20  | 1.92E-02 | -15.58 | 26.03 | 5.50E-01 |
| cg13118545 | -41.61 | 20.51 | 4.25E-02 | -46.52 | 25.48 | 6.79E-02 | -106.54 | 105.38 | 3.12E-01 | 65.16   | 74.04 | 3.79E-01 | -52.32 | 42.07 | 2.14E-01 |
| cg08844698 | -11.49 | 5.66  | 4.25E-02 | -20.22 | 8.67  | 1.97E-02 | -8.43   | 12.16  | 4.88E-01 | -1.53   | 13.51 | 9.10E-01 | -4.24  | 13.32 | 7.50E-01 |
| cg17207337 | 16.55  | 8.16  | 4.25E-02 | 19.25  | 14.93 | 1.97E-01 | -3.71   | 17.24  | 8.29E-01 | 32.30   | 15.43 | 3.64E-02 | 13.19  | 18.32 | 4.72E-01 |
| cg05945274 | -17.05 | 8.41  | 4.25E-02 | -37.58 | 12.16 | 2.00E-03 | -0.28   | 13.61  | 9.84E-01 | -7.92   | 10.43 | 4.48E-01 | -23.32 | 15.00 | 1.20E-01 |
| cg11908131 | 4.30   | 2.12  | 4.25E-02 | 3.65   | 2.97  | 2.18E-01 | 9.16    | 5.19   | 7.76E-02 | 2.98    | 4.45  | 5.03E-01 | 2.42   | 6.74  | 7.20E-01 |
| cg08276062 | 16.70  | 8.23  | 4.25E-02 | -4.21  | 19.02 | 8.25E-01 | 57.93   | 31.53  | 6.61E-02 | 15.86   | 8.61  | 6.53E-02 | 31.03  | 25.35 | 2.21E-01 |
| cg11054816 | 5.60   | 2.76  | 4.25E-02 | 4.90   | 3.69  | 1.85E-01 | 9.29    | 7.15   | 1.94E-01 | 9.43    | 7.54  | 2.11E-01 | 1.36   | 6.94  | 8.45E-01 |
| cg24318763 | 11.89  | 5.86  | 4.25E-02 | 17.86  | 9.30  | 5.49E-02 | 8.80    | 12.55  | 4.83E-01 | 13.11   | 13.69 | 3.38E-01 | 2.38   | 13.05 | 8.55E-01 |
| cg04184427 | 15.73  | 7.75  | 4.25E-02 | 5.81   | 13.22 | 6.60E-01 | 31.39   | 15.69  | 4.55E-02 | 14.07   | 18.28 | 4.41E-01 | 15.24  | 16.09 | 3.44E-01 |
| cg14248369 | 11.46  | 5.65  | 4.25E-02 | 5.50   | 8.49  | 5.17E-01 | 12.09   | 10.83  | 2.64E-01 | 27.89   | 18.88 | 1.40E-01 | 16.55  | 12.78 | 1.95E-01 |
| cg00691123 | 5.32   | 2.62  | 4.25E-02 | 4.81   | 3.37  | 1.53E-01 | 12.01   | 7.77   | 1.22E-01 | 7.47    | 7.28  | 3.05E-01 | 0.43   | 6.78  | 9.49E-01 |
| cg02482717 | -16.27 | 8.02  | 4.25E-02 | -13.82 | 13.75 | 3.15E-01 | -9.99   | 15.78  | 5.26E-01 | -13.84  | 16.74 | 4.08E-01 | -33.79 | 19.34 | 8.07E-02 |
| cg01502428 | 4.39   | 2.16  | 4.25E-02 | 3.74   | 2.83  | 1.87E-01 | 10.32   | 5.17   | 4.60E-02 | 4.04    | 5.53  | 4.65E-01 | -2.41  | 7.23  | 7.39E-01 |
| cg04854226 | 15.60  | 7.69  | 4.25E-02 | 22.02  | 10.00 | 2.76E-02 | 42.76   | 30.24  | 1.57E-01 | -11.59  | 37.52 | 7.57E-01 | 0.96   | 14.01 | 9.45E-01 |

|            |        |       |          |        |       |          |        |        |          |        |       |          |        |       |          |
|------------|--------|-------|----------|--------|-------|----------|--------|--------|----------|--------|-------|----------|--------|-------|----------|
| cg06311103 | 18.60  | 9.17  | 4.25E-02 | 15.68  | 17.01 | 3.56E-01 | 19.19  | 19.85  | 3.34E-01 | 16.66  | 16.21 | 3.04E-01 | 26.28  | 21.89 | 2.30E-01 |
| cg09580214 | -3.75  | 1.85  | 4.25E-02 | -4.03  | 2.74  | 1.41E-01 | -2.31  | 4.16   | 5.78E-01 | 2.75   | 5.92  | 6.42E-01 | -6.85  | 3.68  | 6.27E-02 |
| cg02895725 | 13.77  | 6.79  | 4.25E-02 | 15.04  | 16.30 | 3.56E-01 | 7.92   | 22.13  | 7.20E-01 | 12.40  | 8.43  | 1.41E-01 | 28.07  | 23.29 | 2.28E-01 |
| cg07091552 | 15.02  | 7.40  | 4.25E-02 | 41.54  | 19.65 | 3.45E-02 | 25.75  | 19.38  | 1.84E-01 | 8.52   | 9.34  | 3.62E-01 | 0.12   | 25.56 | 9.96E-01 |
| cg02413246 | 15.52  | 7.65  | 4.25E-02 | 44.14  | 19.38 | 2.27E-02 | 26.15  | 26.99  | 3.33E-01 | 8.02   | 7.69  | 2.97E-01 | 17.25  | 25.07 | 4.91E-01 |
| cg16700004 | 9.96   | 4.91  | 4.25E-02 | 5.57   | 9.71  | 5.66E-01 | 9.06   | 13.09  | 4.89E-01 | 14.93  | 6.95  | 3.16E-02 | -1.89  | 15.21 | 9.01E-01 |
| cg13400306 | -13.80 | 6.81  | 4.25E-02 | -28.94 | 12.29 | 1.86E-02 | 4.35   | 24.47  | 8.59E-01 | -6.20  | 8.58  | 4.70E-01 | -25.93 | 21.41 | 2.26E-01 |
| cg26205652 | 14.53  | 7.16  | 4.25E-02 | 7.20   | 24.09 | 7.65E-01 | 7.61   | 78.87  | 9.23E-01 | 14.09  | 8.03  | 7.93E-02 | 24.32  | 21.84 | 2.65E-01 |
| cg24326501 | -31.67 | 15.61 | 4.25E-02 | -70.49 | 29.40 | 1.65E-02 | -39.08 | 113.90 | 7.31E-01 | -19.38 | 19.92 | 3.31E-01 | 10.07  | 53.58 | 8.51E-01 |
| cg24525988 | -8.10  | 3.99  | 4.25E-02 | -17.01 | 7.26  | 1.92E-02 | 0.80   | 13.23  | 9.52E-01 | -3.47  | 5.66  | 5.40E-01 | -11.94 | 12.09 | 3.23E-01 |
| cg22272840 | 13.17  | 6.49  | 4.25E-02 | 8.80   | 13.18 | 5.04E-01 | 47.68  | 25.04  | 5.69E-02 | 8.77   | 8.79  | 3.18E-01 | 21.16  | 17.14 | 2.17E-01 |
| cg04504475 | 37.98  | 18.72 | 4.25E-02 | 32.61  | 23.65 | 1.68E-01 | -26.68 | 104.42 | 7.98E-01 | -13.79 | 79.22 | 8.62E-01 | 67.22  | 35.07 | 5.53E-02 |
| cg13458212 | 13.21  | 6.51  | 4.25E-02 | 27.25  | 17.13 | 1.12E-01 | 13.21  | 24.54  | 5.90E-01 | 16.28  | 9.00  | 7.03E-02 | -0.74  | 12.74 | 9.54E-01 |
| cg11545923 | -6.65  | 3.28  | 4.25E-02 | -9.23  | 6.39  | 1.49E-01 | -6.84  | 11.03  | 5.35E-01 | -5.00  | 4.73  | 2.90E-01 | -7.20  | 8.00  | 3.68E-01 |
| cg11752440 | 41.53  | 20.48 | 4.25E-02 | 63.18  | 25.66 | 1.38E-02 | 2.01   | 80.26  | 9.80E-01 | 46.04  | 62.13 | 4.59E-01 | -20.17 | 47.02 | 6.68E-01 |
| cg20928824 | 22.71  | 11.20 | 4.25E-02 | 25.05  | 21.81 | 2.51E-01 | 13.76  | 52.31  | 7.92E-01 | 24.20  | 14.66 | 9.87E-02 | 12.63  | 34.18 | 7.12E-01 |
| cg25519804 | 34.85  | 17.18 | 4.25E-02 | 29.01  | 23.54 | 2.18E-01 | 0.37   | 60.66  | 9.95E-01 | 63.81  | 45.36 | 1.60E-01 | 41.89  | 34.80 | 2.29E-01 |
| cg21243846 | 14.55  | 7.17  | 4.25E-02 | 9.05   | 12.74 | 4.78E-01 | 10.49  | 14.45  | 4.68E-01 | 13.01  | 14.66 | 3.75E-01 | 30.28  | 16.14 | 6.06E-02 |
| cg08799655 | 16.15  | 7.96  | 4.25E-02 | 14.24  | 21.58 | 5.09E-01 | 8.96   | 31.34  | 7.75E-01 | 19.20  | 9.31  | 3.91E-02 | -6.18  | 30.65 | 8.40E-01 |
| cg11464160 | 6.58   | 3.24  | 4.25E-02 | 8.65   | 4.23  | 4.10E-02 | 5.87   | 9.03   | 5.16E-01 | 12.57  | 8.36  | 1.33E-01 | -5.55  | 8.01  | 4.89E-01 |
| cg07236781 | -7.46  | 3.68  | 4.25E-02 | -7.37  | 4.67  | 1.14E-01 | -14.34 | 10.88  | 1.87E-01 | 7.64   | 12.25 | 5.33E-01 | -11.08 | 8.81  | 2.09E-01 |
| cg11360230 | -5.76  | 2.84  | 4.26E-02 | -9.71  | 4.52  | 3.16E-02 | -2.18  | 6.20   | 7.25E-01 | -7.75  | 5.81  | 1.83E-01 | 2.42   | 7.16  | 7.35E-01 |
| cg07915849 | 7.21   | 3.56  | 4.26E-02 | -0.12  | 6.01  | 9.84E-01 | 1.24   | 7.41   | 8.67E-01 | 11.80  | 3.98  | 3.04E-03 | 14.43  | 8.80  | 1.01E-01 |
| cg12762474 | -11.80 | 5.82  | 4.26E-02 | -15.91 | 9.75  | 1.02E-01 | -0.63  | 19.18  | 9.74E-01 | -6.06  | 6.19  | 3.28E-01 | -37.10 | 16.66 | 2.60E-02 |
| cg10448562 | 30.48  | 15.03 | 4.26E-02 | 41.55  | 28.04 | 1.38E-01 | 6.96   | 141.81 | 9.61E-01 | 28.47  | 19.39 | 1.42E-01 | 13.55  | 47.36 | 7.75E-01 |
| cg17412351 | 7.98   | 3.94  | 4.26E-02 | 7.41   | 6.03  | 2.19E-01 | 6.93   | 8.38   | 4.09E-01 | 9.98   | 8.95  | 2.65E-01 | 8.57   | 9.84  | 3.84E-01 |
| cg17093877 | 11.27  | 5.56  | 4.26E-02 | 13.24  | 8.26  | 1.09E-01 | 11.47  | 11.24  | 3.08E-01 | 2.72   | 15.68 | 8.62E-01 | 12.01  | 13.17 | 3.62E-01 |
| cg18023455 | -5.99  | 2.95  | 4.26E-02 | -9.74  | 5.55  | 7.92E-02 | 2.06   | 6.69   | 7.58E-01 | -7.27  | 4.66  | 1.19E-01 | -5.92  | 8.52  | 4.87E-01 |
| cg15364504 | -9.63  | 4.75  | 4.26E-02 | -7.73  | 8.09  | 3.39E-01 | -14.24 | 9.35   | 1.28E-01 | -12.26 | 10.49 | 2.42E-01 | -4.03  | 10.85 | 7.10E-01 |
| cg00147638 | -9.99  | 4.93  | 4.26E-02 | -12.42 | 7.79  | 1.11E-01 | -19.77 | 11.89  | 9.62E-02 | -1.22  | 11.04 | 9.12E-01 | -6.03  | 10.28 | 5.57E-01 |
| cg17408686 | 7.25   | 3.57  | 4.26E-02 | 6.07   | 5.06  | 2.30E-01 | 1.38   | 8.80   | 8.75E-01 | 10.56  | 9.35  | 2.59E-01 | 12.85  | 8.19  | 1.17E-01 |
| cg13372658 | -15.17 | 7.48  | 4.26E-02 | -11.49 | 12.63 | 3.63E-01 | -16.34 | 12.81  | 2.02E-01 | -5.29  | 7.31  | 4.70E-01 | -45.87 | 17.09 | 7.29E-03 |
| cg01021487 | 14.51  | 7.16  | 4.26E-02 | 4.53   | 15.11 | 7.65E-01 | -5.69  | 30.79  | 8.53E-01 | 19.63  | 9.11  | 3.12E-02 | 16.18  | 22.18 | 4.66E-01 |
| cg00473501 | 7.31   | 3.61  | 4.26E-02 | 4.19   | 4.81  | 3.83E-01 | 21.01  | 9.62   | 2.89E-02 | 8.52   | 8.78  | 3.32E-01 | 4.39   | 10.07 | 6.63E-01 |
| cg24681307 | 6.01   | 2.96  | 4.26E-02 | 4.25   | 3.77  | 2.60E-01 | 17.31  | 7.69   | 2.43E-02 | 5.25   | 9.66  | 5.87E-01 | 2.28   | 7.93  | 7.74E-01 |

|            |        |       |          |        |       |          |         |        |          |        |       |          |         |       |          |
|------------|--------|-------|----------|--------|-------|----------|---------|--------|----------|--------|-------|----------|---------|-------|----------|
| cg18697156 | 27.54  | 13.58 | 4.26E-02 | 31.37  | 16.20 | 5.28E-02 | 92.52   | 65.13  | 1.55E-01 | -55.89 | 71.28 | 4.33E-01 | 16.07   | 29.14 | 5.81E-01 |
| cg19398269 | -6.11  | 3.02  | 4.26E-02 | -4.02  | 4.25  | 3.44E-01 | -9.42   | 6.52   | 1.48E-01 | -6.19  | 10.20 | 5.44E-01 | -7.88   | 6.84  | 2.49E-01 |
| cg01369750 | 24.70  | 12.18 | 4.26E-02 | 58.87  | 20.59 | 4.24E-03 | 27.81   | 34.71  | 4.23E-01 | 24.48  | 10.28 | 1.73E-02 | -2.86   | 16.59 | 8.63E-01 |
| cg25408008 | -7.58  | 3.74  | 4.26E-02 | -15.19 | 6.70  | 2.33E-02 | 2.04    | 10.35  | 8.43E-01 | -3.26  | 5.68  | 5.65E-01 | -13.07  | 10.12 | 1.97E-01 |
| cg04455137 | 17.12  | 8.44  | 4.26E-02 | 21.72  | 11.40 | 5.68E-02 | 1.90    | 38.00  | 9.60E-01 | 17.15  | 27.60 | 5.34E-01 | 11.37   | 15.21 | 4.55E-01 |
| cg18289580 | -12.08 | 5.96  | 4.26E-02 | -23.94 | 10.89 | 2.79E-02 | -20.75  | 29.25  | 4.78E-01 | -10.08 | 6.57  | 1.25E-01 | 16.33   | 20.64 | 4.29E-01 |
| cg11431820 | -24.72 | 12.19 | 4.26E-02 | -12.44 | 32.96 | 7.06E-01 | -213.40 | 137.00 | 1.19E-01 | -23.34 | 13.85 | 9.20E-02 | -40.45  | 43.09 | 3.48E-01 |
| cg10567637 | -23.44 | 11.56 | 4.26E-02 | -20.80 | 14.10 | 1.40E-01 | -16.61  | 52.70  | 7.53E-01 | 24.59  | 45.31 | 5.87E-01 | -47.77  | 24.94 | 5.55E-02 |
| cg08806644 | 18.62  | 9.18  | 4.26E-02 | 33.92  | 22.51 | 1.32E-01 | 15.13   | 46.21  | 7.43E-01 | 11.45  | 10.93 | 2.95E-01 | 48.46   | 30.85 | 1.16E-01 |
| cg14836313 | 17.05  | 8.41  | 4.26E-02 | 6.59   | 13.13 | 6.16E-01 | 34.31   | 16.15  | 3.36E-02 | 15.72  | 20.82 | 4.50E-01 | 15.94   | 21.34 | 4.55E-01 |
| cg16904445 | 16.64  | 8.21  | 4.26E-02 | 6.90   | 20.19 | 7.33E-01 | 6.96    | 28.50  | 8.07E-01 | 19.90  | 10.06 | 4.79E-02 | 19.52   | 28.04 | 4.86E-01 |
| cg18053715 | -9.73  | 4.80  | 4.26E-02 | -18.66 | 9.51  | 4.98E-02 | -6.72   | 12.97  | 6.04E-01 | -10.25 | 7.34  | 1.63E-01 | 1.77    | 11.28 | 8.75E-01 |
| cg20296990 | 13.26  | 6.54  | 4.26E-02 | 17.48  | 13.04 | 1.80E-01 | 8.68    | 15.85  | 5.84E-01 | 12.87  | 9.53  | 1.77E-01 | 12.31   | 19.94 | 5.37E-01 |
| cg26804932 | -17.61 | 8.69  | 4.26E-02 | -13.29 | 18.13 | 4.64E-01 | -11.42  | 40.91  | 7.80E-01 | -21.04 | 10.88 | 5.32E-02 | -7.22   | 29.30 | 8.05E-01 |
| cg21081729 | 14.44  | 7.12  | 4.26E-02 | 13.37  | 12.86 | 2.98E-01 | -7.11   | 22.27  | 7.49E-01 | 17.16  | 10.25 | 9.42E-02 | 25.72   | 21.66 | 2.35E-01 |
| cg11328303 | 12.29  | 6.06  | 4.26E-02 | 6.20   | 12.90 | 6.31E-01 | 43.90   | 35.50  | 2.16E-01 | 9.53   | 7.67  | 2.14E-01 | 29.52   | 17.16 | 8.53E-02 |
| cg22814740 | -10.96 | 5.40  | 4.26E-02 | -10.97 | 7.63  | 1.50E-01 | -2.30   | 13.68  | 8.67E-01 | -15.52 | 13.70 | 2.57E-01 | -14.39  | 12.54 | 2.51E-01 |
| cg09088720 | 9.96   | 4.91  | 4.26E-02 | 9.16   | 10.97 | 4.04E-01 | 2.02    | 13.47  | 8.81E-01 | 16.61  | 6.95  | 1.69E-02 | -2.66   | 12.03 | 8.25E-01 |
| cg05445187 | 17.51  | 8.64  | 4.26E-02 | 25.85  | 18.62 | 1.65E-01 | 51.60   | 22.88  | 2.41E-02 | 9.83   | 8.70  | 2.59E-01 | 1.29    | 28.08 | 9.63E-01 |
| cg06379589 | -11.46 | 5.65  | 4.26E-02 | -16.47 | 9.04  | 6.86E-02 | -13.67  | 11.49  | 2.34E-01 | -4.59  | 9.62  | 6.33E-01 | -5.85   | 38.83 | 8.80E-01 |
| cg01665555 | 15.63  | 7.71  | 4.26E-02 | 11.23  | 17.53 | 5.22E-01 | 23.84   | 25.12  | 3.43E-01 | 14.68  | 10.22 | 1.51E-01 | 19.95   | 20.38 | 3.28E-01 |
| cg11893951 | 8.63   | 4.26  | 4.26E-02 | 7.06   | 7.90  | 3.71E-01 | 15.67   | 9.75   | 1.08E-01 | 11.41  | 7.72  | 1.40E-01 | 0.57    | 9.20  | 9.50E-01 |
| cg03389164 | -14.41 | 7.11  | 4.26E-02 | -28.37 | 17.07 | 9.65E-02 | 0.66    | 19.25  | 9.73E-01 | -13.34 | 9.13  | 1.44E-01 | -17.69  | 24.53 | 4.71E-01 |
| cg21799898 | 8.79   | 4.33  | 4.26E-02 | 9.34   | 10.38 | 3.68E-01 | -1.96   | 20.06  | 9.22E-01 | 9.56   | 5.21  | 6.66E-02 | 7.31    | 14.74 | 6.20E-01 |
| cg21116579 | 13.70  | 6.76  | 4.27E-02 | 19.75  | 8.41  | 1.88E-02 | 18.77   | 61.45  | 7.60E-01 | 1.44   | 13.79 | 9.17E-01 | 3.62    | 21.13 | 8.64E-01 |
| cg08104023 | -7.63  | 3.76  | 4.27E-02 | -6.96  | 4.99  | 1.63E-01 | -3.72   | 8.55   | 6.63E-01 | -25.50 | 11.05 | 2.10E-02 | -2.95   | 8.08  | 7.15E-01 |
| cg22031614 | 18.55  | 9.15  | 4.27E-02 | 28.01  | 13.65 | 4.02E-02 | -15.01  | 23.81  | 5.28E-01 | 19.91  | 27.68 | 4.72E-01 | 20.44   | 16.87 | 2.26E-01 |
| cg11789804 | -8.55  | 4.22  | 4.27E-02 | -11.11 | 8.48  | 1.90E-01 | -21.03  | 11.94  | 7.83E-02 | -5.90  | 5.94  | 3.21E-01 | -1.67   | 11.96 | 8.89E-01 |
| cg16342439 | 14.78  | 7.29  | 4.27E-02 | 20.29  | 16.45 | 2.17E-01 | 13.44   | 21.19  | 5.26E-01 | 23.57  | 12.73 | 6.41E-02 | 4.11    | 12.21 | 7.36E-01 |
| cg18968969 | 26.77  | 13.21 | 4.27E-02 | 26.38  | 14.65 | 7.17E-02 | 48.65   | 21.52  | 2.38E-02 | -32.17 | 33.00 | 3.30E-01 | 37.87   | 23.87 | 1.13E-01 |
| cg04330122 | -11.12 | 5.49  | 4.27E-02 | -16.12 | 16.06 | 3.16E-01 | -4.40   | 27.79  | 8.74E-01 | -8.95  | 6.28  | 1.54E-01 | -27.53  | 19.26 | 1.53E-01 |
| cg21836627 | 30.06  | 14.83 | 4.27E-02 | 15.63  | 33.96 | 6.45E-01 | -7.37   | 130.05 | 9.55E-01 | 40.66  | 18.61 | 2.89E-02 | 8.43    | 36.95 | 8.20E-01 |
| cg04468671 | 8.98   | 4.43  | 4.27E-02 | 8.08   | 5.59  | 1.48E-01 | 20.03   | 12.22  | 1.01E-01 | 6.98   | 13.45 | 6.04E-01 | 3.90    | 12.15 | 7.48E-01 |
| cg19591623 | -50.00 | 24.67 | 4.27E-02 | -60.84 | 33.46 | 6.91E-02 | 57.63   | 119.52 | 6.30E-01 | -93.86 | 63.83 | 1.41E-01 | -20.32  | 47.95 | 6.72E-01 |
| cg03323794 | -68.61 | 33.85 | 4.27E-02 | -58.85 | 29.42 | 4.55E-02 | -96.37  | 144.53 | 5.05E-01 | 51.16  | 85.17 | 5.48E-01 | -143.97 | 55.43 | 9.40E-03 |



|            |        |       |          |        |       |          |         |        |          |        |       |          |        |       |          |
|------------|--------|-------|----------|--------|-------|----------|---------|--------|----------|--------|-------|----------|--------|-------|----------|
| cg23717186 | -8.59  | 4.24  | 4.27E-02 | -5.19  | 6.18  | 4.01E-01 | -12.67  | 9.52   | 1.83E-01 | -18.98 | 12.20 | 1.20E-01 | -6.40  | 9.26  | 4.89E-01 |
| cg14719804 | -28.78 | 14.20 | 4.27E-02 | -35.11 | 19.35 | 6.96E-02 | -58.57  | 52.09  | 2.61E-01 | -8.57  | 35.13 | 8.07E-01 | -18.42 | 30.02 | 5.40E-01 |
| cg03801286 | 5.84   | 2.88  | 4.27E-02 | 5.39   | 3.68  | 1.43E-01 | 10.87   | 7.55   | 1.50E-01 | 4.21   | 8.35  | 6.14E-01 | 3.68   | 8.19  | 6.53E-01 |
| cg04455712 | 17.64  | 8.70  | 4.27E-02 | 15.37  | 16.98 | 3.65E-01 | -7.22   | 20.58  | 7.26E-01 | 23.67  | 13.22 | 7.33E-02 | 37.08  | 24.65 | 1.32E-01 |
| cg02878913 | 15.79  | 7.79  | 4.27E-02 | 26.72  | 18.37 | 1.46E-01 | 6.40    | 30.54  | 8.34E-01 | 15.59  | 9.55  | 1.03E-01 | 2.29   | 25.89 | 9.29E-01 |
| cg13629345 | 26.24  | 12.94 | 4.27E-02 | 16.77  | 32.79 | 6.09E-01 | -171.97 | 188.45 | 3.61E-01 | 34.62  | 14.78 | 1.92E-02 | -29.37 | 48.13 | 5.42E-01 |
| cg04363623 | 17.54  | 8.65  | 4.27E-02 | 23.54  | 16.46 | 1.53E-01 | -5.08   | 37.44  | 8.92E-01 | 18.44  | 11.67 | 1.14E-01 | 9.71   | 24.86 | 6.96E-01 |
| cg08820369 | -20.17 | 9.95  | 4.27E-02 | -17.62 | 24.27 | 4.68E-01 | 13.02   | 42.02  | 7.57E-01 | -24.73 | 12.06 | 4.04E-02 | -11.64 | 32.32 | 7.19E-01 |
| cg11566441 | -13.45 | 6.64  | 4.27E-02 | -15.15 | 10.73 | 1.58E-01 | -17.41  | 14.13  | 2.18E-01 | -5.12  | 13.65 | 7.08E-01 | -16.21 | 16.54 | 3.27E-01 |
| cg22510442 | -20.60 | 10.16 | 4.27E-02 | -20.63 | 12.65 | 1.03E-01 | -49.98  | 62.89  | 4.27E-01 | 32.41  | 46.91 | 4.90E-01 | -26.65 | 19.18 | 1.65E-01 |
| cg06144110 | -14.37 | 7.09  | 4.27E-02 | -25.27 | 11.32 | 2.56E-02 | -3.07   | 15.87  | 8.47E-01 | -20.66 | 17.52 | 2.38E-01 | -1.87  | 14.36 | 8.96E-01 |
| cg01410469 | -40.69 | 20.08 | 4.27E-02 | -35.79 | 23.76 | 1.32E-01 | -127.87 | 100.64 | 2.04E-01 | 58.54  | 72.96 | 4.22E-01 | -66.87 | 37.74 | 7.64E-02 |
| cg23351853 | -38.86 | 19.17 | 4.27E-02 | -43.77 | 23.36 | 6.10E-02 | -158.78 | 95.71  | 9.71E-02 | 1.84   | 74.81 | 9.80E-01 | -14.16 | 40.82 | 7.29E-01 |
| cg07696918 | 12.85  | 6.34  | 4.27E-02 | 13.35  | 12.80 | 2.97E-01 | 30.48   | 15.22  | 4.52E-02 | 4.60   | 9.14  | 6.15E-01 | 20.71  | 20.06 | 3.02E-01 |
| cg03262077 | -28.43 | 14.03 | 4.27E-02 | 0.77   | 26.99 | 9.77E-01 | 13.58   | 61.58  | 8.25E-01 | -42.19 | 19.71 | 3.24E-02 | -46.53 | 33.88 | 1.70E-01 |
| cg12797746 | -8.08  | 3.99  | 4.27E-02 | -11.44 | 5.77  | 4.76E-02 | -2.00   | 11.62  | 8.63E-01 | -12.68 | 11.12 | 2.54E-01 | -2.75  | 7.56  | 7.16E-01 |
| cg06645778 | 5.01   | 2.47  | 4.27E-02 | 4.47   | 3.15  | 1.55E-01 | 12.75   | 6.74   | 5.85E-02 | 0.31   | 6.61  | 9.63E-01 | 4.54   | 7.52  | 5.46E-01 |
| cg11116086 | 16.45  | 8.12  | 4.27E-02 | 18.24  | 10.71 | 8.85E-02 | 10.23   | 23.53  | 6.64E-01 | -6.94  | 42.62 | 8.71E-01 | 18.54  | 15.63 | 2.36E-01 |
| cg21846888 | 20.45  | 10.09 | 4.27E-02 | 31.55  | 21.53 | 1.43E-01 | 15.56   | 21.97  | 4.79E-01 | 8.01   | 15.19 | 5.98E-01 | 52.32  | 28.21 | 6.36E-02 |
| cg07213060 | 21.39  | 10.56 | 4.27E-02 | 31.67  | 18.94 | 9.45E-02 | 0.57    | 32.47  | 9.86E-01 | 13.33  | 17.53 | 4.47E-01 | 30.09  | 22.44 | 1.80E-01 |
| cg21185662 | 6.70   | 3.30  | 4.27E-02 | 8.21   | 4.54  | 7.06E-02 | 4.49    | 7.05   | 5.24E-01 | 5.08   | 10.08 | 6.14E-01 | 5.70   | 8.74  | 5.14E-01 |
| cg21606329 | 10.26  | 5.07  | 4.27E-02 | 5.98   | 11.99 | 6.18E-01 | 42.26   | 45.74  | 3.55E-01 | 12.32  | 5.80  | 3.37E-02 | -14.97 | 23.24 | 5.20E-01 |
| cg18508425 | 9.93   | 4.90  | 4.28E-02 | 14.01  | 7.04  | 4.66E-02 | 17.66   | 9.64   | 6.71E-02 | -10.88 | 15.41 | 4.80E-01 | 3.59   | 9.61  | 7.09E-01 |
| cg27143703 | -49.17 | 24.27 | 4.28E-02 | -72.38 | 33.76 | 3.20E-02 | 138.90  | 121.61 | 2.53E-01 | -57.21 | 41.89 | 1.72E-01 | -20.58 | 53.24 | 6.99E-01 |
| cg03055158 | 16.78  | 8.28  | 4.28E-02 | 16.35  | 21.01 | 4.37E-01 | 9.76    | 28.26  | 7.30E-01 | 22.53  | 10.17 | 2.67E-02 | -16.02 | 26.75 | 5.49E-01 |
| cg19332303 | 40.96  | 20.22 | 4.28E-02 | 41.79  | 23.49 | 7.52E-02 | 26.52   | 136.89 | 8.46E-01 | 88.79  | 85.54 | 2.99E-01 | 24.60  | 47.47 | 6.04E-01 |
| cg04707217 | -12.61 | 6.22  | 4.28E-02 | -18.11 | 8.73  | 3.81E-02 | 8.15    | 16.18  | 6.14E-01 | -11.80 | 19.30 | 5.41E-01 | -14.11 | 12.70 | 2.66E-01 |
| cg20033598 | 32.34  | 15.96 | 4.28E-02 | 11.40  | 48.04 | 8.12E-01 | -80.48  | 250.84 | 7.48E-01 | 42.80  | 17.60 | 1.50E-02 | -61.22 | 63.91 | 3.38E-01 |
| cg16968623 | -12.11 | 5.98  | 4.28E-02 | -28.83 | 16.19 | 7.50E-02 | -26.30  | 24.46  | 2.82E-01 | -7.08  | 7.01  | 3.12E-01 | -19.00 | 21.56 | 3.78E-01 |
| cg13921352 | 24.05  | 11.87 | 4.28E-02 | 18.21  | 17.72 | 3.04E-01 | 15.07   | 32.15  | 6.39E-01 | 36.22  | 30.43 | 2.34E-01 | 31.60  | 23.15 | 1.72E-01 |
| cg06541550 | 38.79  | 19.15 | 4.28E-02 | 52.66  | 57.39 | 3.59E-01 | -97.38  | 265.09 | 7.13E-01 | 42.65  | 21.29 | 4.51E-02 | -14.47 | 70.31 | 8.37E-01 |
| cg14703589 | 21.49  | 10.61 | 4.28E-02 | 22.63  | 16.55 | 1.71E-01 | 29.59   | 21.38  | 1.66E-01 | 8.61   | 23.98 | 7.20E-01 | 21.88  | 27.62 | 4.28E-01 |
| cg17499251 | -10.20 | 5.03  | 4.28E-02 | -13.92 | 7.72  | 7.13E-02 | -3.71   | 10.57  | 7.26E-01 | -10.13 | 12.92 | 4.33E-01 | -9.67  | 11.38 | 3.95E-01 |
| cg05587400 | 7.37   | 3.64  | 4.28E-02 | 6.21   | 4.61  | 1.77E-01 | 16.83   | 9.30   | 7.05E-02 | 5.96   | 10.96 | 5.87E-01 | 2.35   | 10.77 | 8.27E-01 |
| cg23102014 | -8.05  | 3.97  | 4.28E-02 | -15.60 | 6.85  | 2.28E-02 | -10.45  | 11.29  | 3.55E-01 | 0.56   | 6.79  | 9.34E-01 | -8.62  | 8.95  | 3.36E-01 |

|            |        |       |          |        |       |          |        |       |          |        |       |          |        |       |          |
|------------|--------|-------|----------|--------|-------|----------|--------|-------|----------|--------|-------|----------|--------|-------|----------|
| cg20639332 | -13.43 | 6.63  | 4.28E-02 | -11.78 | 12.65 | 3.52E-01 | 12.90  | 24.17 | 5.93E-01 | -19.57 | 9.05  | 3.07E-02 | -5.90  | 19.64 | 7.64E-01 |
| cg25284492 | -27.13 | 13.39 | 4.28E-02 | -25.14 | 19.27 | 1.92E-01 | -37.62 | 32.47 | 2.47E-01 | -20.99 | 49.57 | 6.72E-01 | -25.76 | 25.61 | 3.15E-01 |
| cg13062137 | 14.47  | 7.15  | 4.28E-02 | 1.37   | 19.43 | 9.44E-01 | 6.50   | 37.17 | 8.61E-01 | 17.41  | 8.09  | 3.14E-02 | 9.74   | 32.72 | 7.66E-01 |
| cg26405475 | 8.32   | 4.11  | 4.28E-02 | 8.97   | 6.39  | 1.61E-01 | 5.73   | 9.08  | 5.28E-01 | 13.65  | 11.37 | 2.30E-01 | 6.59   | 8.17  | 4.20E-01 |
| cg02380531 | 14.53  | 7.17  | 4.28E-02 | 18.45  | 15.04 | 2.20E-01 | 13.53  | 19.09 | 4.79E-01 | 9.49   | 10.90 | 3.84E-01 | 21.70  | 16.08 | 1.77E-01 |
| cg23053573 | 17.49  | 8.63  | 4.28E-02 | 14.17  | 29.06 | 6.26E-01 | -29.44 | 92.21 | 7.50E-01 | 20.25  | 9.41  | 3.14E-02 | -8.87  | 34.85 | 7.99E-01 |
| cg10288995 | 19.72  | 9.74  | 4.28E-02 | 13.47  | 12.47 | 2.80E-01 | 36.94  | 30.01 | 2.18E-01 | 4.07   | 33.24 | 9.03E-01 | 36.51  | 21.82 | 9.42E-02 |
| cg04291888 | 29.76  | 14.69 | 4.28E-02 | 75.53  | 25.31 | 2.85E-03 | -6.00  | 49.31 | 9.03E-01 | 12.99  | 13.83 | 3.48E-01 | 28.13  | 19.10 | 1.41E-01 |
| cg18195352 | -7.69  | 3.79  | 4.28E-02 | -6.98  | 5.96  | 2.42E-01 | -13.49 | 8.06  | 9.42E-02 | 4.97   | 10.07 | 6.22E-01 | -11.13 | 7.89  | 1.58E-01 |
| cg20236424 | -11.68 | 5.77  | 4.28E-02 | -7.64  | 5.78  | 1.86E-01 | 3.95   | 9.63  | 6.81E-01 | -25.06 | 10.99 | 2.26E-02 | -20.47 | 7.97  | 1.02E-02 |
| cg03628053 | -10.52 | 5.19  | 4.28E-02 | -13.53 | 11.53 | 2.40E-01 | -7.94  | 18.39 | 6.66E-01 | -8.09  | 6.72  | 2.29E-01 | -19.18 | 14.95 | 1.99E-01 |
| cg12920094 | 10.73  | 5.30  | 4.28E-02 | 1.70   | 8.54  | 8.42E-01 | 23.97  | 11.05 | 3.01E-02 | 15.81  | 12.78 | 2.16E-01 | 8.67   | 11.47 | 4.50E-01 |
| cg18099423 | 13.65  | 6.74  | 4.28E-02 | -13.06 | 18.96 | 4.91E-01 | 9.10   | 30.14 | 7.63E-01 | 17.46  | 7.72  | 2.37E-02 | 24.96  | 27.12 | 3.57E-01 |
| cg20539366 | 10.54  | 5.20  | 4.28E-02 | 13.97  | 7.48  | 6.20E-02 | 11.10  | 12.15 | 3.61E-01 | -6.64  | 15.19 | 6.62E-01 | 11.73  | 11.20 | 2.95E-01 |
| cg03147907 | -13.70 | 6.76  | 4.28E-02 | -23.22 | 13.73 | 9.09E-02 | 7.09   | 34.36 | 8.36E-01 | -7.41  | 8.61  | 3.89E-01 | -37.32 | 21.29 | 7.96E-02 |
| cg07814565 | -13.37 | 6.60  | 4.28E-02 | -17.55 | 9.78  | 7.28E-02 | -16.06 | 14.35 | 2.63E-01 | -8.49  | 19.87 | 6.69E-01 | -4.69  | 13.98 | 7.37E-01 |
| cg22978661 | -10.86 | 5.36  | 4.28E-02 | -17.14 | 12.84 | 1.82E-01 | -8.01  | 15.46 | 6.05E-01 | -10.06 | 6.77  | 1.37E-01 | -7.65  | 19.07 | 6.88E-01 |
| cg18483902 | 15.62  | 7.71  | 4.28E-02 | -0.40  | 17.97 | 9.82E-01 | 10.19  | 18.87 | 5.89E-01 | 21.25  | 10.61 | 4.52E-02 | 22.94  | 22.21 | 3.02E-01 |
| cg08264266 | -9.92  | 4.90  | 4.28E-02 | -17.95 | 11.97 | 1.34E-01 | -7.09  | 20.88 | 7.34E-01 | -8.17  | 5.94  | 1.69E-01 | -9.96  | 15.70 | 5.26E-01 |
| cg21042673 | 11.23  | 5.54  | 4.28E-02 | 2.81   | 13.57 | 8.36E-01 | -21.68 | 30.42 | 4.76E-01 | 12.87  | 6.53  | 4.89E-02 | 27.62  | 19.58 | 1.58E-01 |
| cg27379109 | 8.95   | 4.42  | 4.28E-02 | 15.56  | 6.74  | 2.11E-02 | 6.50   | 11.00 | 5.54E-01 | 5.43   | 13.43 | 6.86E-01 | 2.09   | 8.07  | 7.95E-01 |
| cg25313090 | 15.40  | 7.60  | 4.28E-02 | 30.39  | 11.87 | 1.05E-02 | 7.23   | 14.01 | 6.06E-01 | 9.52   | 19.70 | 6.29E-01 | -4.21  | 19.90 | 8.32E-01 |
| cg15415194 | -9.58  | 4.73  | 4.28E-02 | -13.57 | 7.28  | 6.22E-02 | -11.37 | 10.73 | 2.89E-01 | 0.60   | 11.03 | 9.57E-01 | -8.77  | 10.62 | 4.09E-01 |
| cg20974621 | -19.66 | 9.71  | 4.29E-02 | -23.19 | 19.56 | 2.36E-01 | 30.40  | 30.10 | 3.12E-01 | -22.12 | 8.89  | 1.28E-02 | -44.87 | 28.92 | 1.21E-01 |
| cg03719032 | -17.84 | 8.81  | 4.29E-02 | -12.53 | 11.31 | 2.68E-01 | -17.49 | 24.92 | 4.83E-01 | -1.42  | 34.95 | 9.68E-01 | -38.81 | 19.44 | 4.59E-02 |
| cg18812386 | 6.99   | 3.45  | 4.29E-02 | 7.41   | 6.39  | 2.46E-01 | 8.87   | 11.79 | 4.52E-01 | 5.11   | 6.72  | 4.47E-01 | 7.58   | 5.76  | 1.88E-01 |
| cg08115510 | 25.71  | 12.70 | 4.29E-02 | 23.01  | 15.86 | 1.47E-01 | -3.89  | 47.55 | 9.35E-01 | 42.10  | 36.46 | 2.48E-01 | 36.83  | 31.09 | 2.36E-01 |
| cg13150534 | 13.56  | 6.70  | 4.29E-02 | 12.26  | 10.88 | 2.60E-01 | 8.20   | 11.97 | 4.93E-01 | 24.84  | 19.87 | 2.11E-01 | 18.15  | 15.20 | 2.32E-01 |
| cg16344511 | 19.19  | 9.48  | 4.29E-02 | 15.70  | 19.32 | 4.16E-01 | -2.86  | 22.22 | 8.97E-01 | 30.68  | 13.69 | 2.50E-02 | 12.54  | 30.30 | 6.79E-01 |
| cg16438686 | 17.08  | 8.43  | 4.29E-02 | 28.07  | 14.62 | 5.48E-02 | 23.81  | 15.52 | 1.25E-01 | -9.58  | 18.50 | 6.04E-01 | 16.43  | 20.82 | 4.30E-01 |
| cg14285744 | 9.59   | 4.74  | 4.29E-02 | 19.64  | 8.62  | 2.27E-02 | 6.90   | 18.21 | 7.05E-01 | 3.95   | 6.64  | 5.52E-01 | 9.80   | 13.65 | 4.73E-01 |
| cg20624391 | 25.13  | 12.41 | 4.29E-02 | 23.68  | 19.04 | 2.14E-01 | -0.83  | 35.35 | 9.81E-01 | 71.47  | 42.14 | 8.99E-02 | 24.56  | 20.53 | 2.32E-01 |
| cg00982136 | -6.56  | 3.24  | 4.29E-02 | -3.35  | 4.50  | 4.57E-01 | -12.90 | 6.13  | 3.55E-02 | 1.38   | 13.64 | 9.20E-01 | -8.96  | 8.50  | 2.92E-01 |
| cg05391892 | -31.16 | 15.39 | 4.29E-02 | -25.57 | 18.58 | 1.69E-01 | 25.51  | 79.29 | 7.48E-01 | -57.27 | 46.68 | 2.20E-01 | -49.74 | 37.51 | 1.85E-01 |
| cg13490979 | -9.42  | 4.65  | 4.29E-02 | -11.93 | 12.26 | 3.30E-01 | -37.67 | 23.07 | 1.03E-01 | -6.07  | 5.44  | 2.64E-01 | -20.51 | 16.03 | 2.01E-01 |

|            |        |       |          |        |       |          |         |        |          |        |       |          |        |       |          |
|------------|--------|-------|----------|--------|-------|----------|---------|--------|----------|--------|-------|----------|--------|-------|----------|
| cg07162700 | -10.32 | 5.10  | 4.29E-02 | -11.20 | 9.17  | 2.22E-01 | -0.19   | 11.69  | 9.87E-01 | -14.70 | 8.88  | 9.78E-02 | -11.56 | 12.31 | 3.48E-01 |
| cg00945443 | -11.30 | 5.58  | 4.29E-02 | -18.80 | 14.33 | 1.90E-01 | -41.56  | 30.57  | 1.74E-01 | -11.41 | 5.51  | 3.85E-02 | 15.57  | 19.42 | 4.23E-01 |
| cg14071612 | 8.46   | 4.18  | 4.29E-02 | 6.76   | 6.38  | 2.89E-01 | -0.99   | 10.47  | 9.24E-01 | 24.26  | 13.22 | 6.64E-02 | 10.60  | 7.50  | 1.58E-01 |
| cg08705942 | -10.72 | 5.30  | 4.29E-02 | -17.59 | 12.65 | 1.64E-01 | -30.36  | 26.81  | 2.57E-01 | -8.18  | 6.25  | 1.91E-01 | -8.59  | 20.30 | 6.72E-01 |
| cg15056794 | -12.57 | 6.21  | 4.29E-02 | -17.64 | 8.84  | 4.60E-02 | -22.33  | 17.58  | 2.04E-01 | -8.69  | 16.54 | 5.99E-01 | 0.59   | 12.65 | 9.63E-01 |
| cg23761428 | 15.83  | 7.82  | 4.29E-02 | 18.09  | 13.99 | 1.96E-01 | 13.00   | 14.40  | 3.67E-01 | 5.70   | 16.46 | 7.29E-01 | 30.27  | 19.12 | 1.13E-01 |
| cg27602981 | -39.74 | 19.63 | 4.29E-02 | -38.99 | 26.18 | 1.36E-01 | 21.09   | 68.72  | 7.59E-01 | -53.34 | 48.68 | 2.73E-01 | -56.10 | 44.58 | 2.08E-01 |
| cg08808402 | -23.68 | 11.69 | 4.29E-02 | -2.90  | 32.92 | 9.30E-01 | -149.18 | 150.91 | 3.23E-01 | -25.59 | 13.49 | 5.77E-02 | -27.37 | 34.35 | 4.26E-01 |
| cg26136772 | 4.78   | 2.36  | 4.29E-02 | 6.54   | 3.44  | 5.71E-02 | 9.52    | 6.06   | 1.16E-01 | 0.30   | 4.52  | 9.46E-01 | 1.65   | 7.26  | 8.21E-01 |
| cg07925900 | -10.16 | 5.02  | 4.29E-02 | -2.86  | 8.67  | 7.42E-01 | -13.32  | 8.07   | 9.88E-02 | -3.58  | 13.11 | 7.85E-01 | -26.86 | 13.85 | 5.25E-02 |
| cg02294758 | 43.31  | 21.40 | 4.29E-02 | 68.37  | 31.76 | 3.13E-02 | 105.88  | 117.34 | 3.67E-01 | 70.96  | 54.22 | 1.91E-01 | -4.54  | 35.10 | 8.97E-01 |
| cg25458630 | 16.12  | 7.96  | 4.29E-02 | 1.50   | 14.38 | 9.17E-01 | 8.21    | 37.41  | 8.26E-01 | 20.57  | 11.06 | 6.29E-02 | 35.71  | 22.13 | 1.07E-01 |
| cg18608055 | -6.94  | 3.43  | 4.29E-02 | -7.27  | 4.47  | 1.04E-01 | -7.80   | 7.84   | 3.20E-01 | -14.82 | 11.55 | 1.99E-01 | 1.05   | 9.42  | 9.11E-01 |
| cg00247535 | 8.48   | 4.19  | 4.29E-02 | 12.78  | 10.98 | 2.44E-01 | 31.47   | 17.68  | 7.51E-02 | 5.62   | 4.91  | 2.52E-01 | 10.80  | 15.76 | 4.93E-01 |
| cg10476206 | 12.95  | 6.40  | 4.29E-02 | 13.68  | 9.67  | 1.57E-01 | 24.10   | 13.08  | 6.54E-02 | 15.10  | 15.97 | 3.44E-01 | -7.55  | 15.86 | 6.34E-01 |
| cg15821095 | 16.15  | 7.98  | 4.29E-02 | 31.16  | 13.77 | 2.36E-02 | 9.81    | 15.24  | 5.20E-01 | 9.80   | 19.74 | 6.20E-01 | 6.18   | 16.76 | 7.12E-01 |
| cg04368808 | -13.80 | 6.82  | 4.29E-02 | 7.54   | 18.77 | 6.88E-01 | -13.06  | 20.07  | 5.15E-01 | -19.43 | 8.23  | 1.83E-02 | 0.58   | 26.33 | 9.82E-01 |
| cg01568269 | -18.94 | 9.36  | 4.29E-02 | -28.21 | 18.55 | 1.28E-01 | -5.84   | 48.28  | 9.04E-01 | -19.94 | 12.33 | 1.06E-01 | -0.40  | 25.81 | 9.87E-01 |
| cg15078838 | 6.98   | 3.45  | 4.30E-02 | 5.34   | 4.35  | 2.20E-01 | 14.17   | 8.86   | 1.10E-01 | 22.05  | 14.91 | 1.39E-01 | 1.81   | 8.43  | 8.30E-01 |
| cg05977776 | -9.44  | 4.67  | 4.30E-02 | -15.13 | 7.45  | 4.24E-02 | -11.71  | 11.59  | 3.12E-01 | -1.66  | 9.42  | 8.60E-01 | -6.03  | 10.41 | 5.63E-01 |
| cg03091829 | -36.02 | 17.79 | 4.30E-02 | -52.44 | 22.85 | 2.18E-02 | -2.26   | 50.39  | 9.64E-01 | 20.34  | 65.77 | 7.57E-01 | -27.72 | 40.21 | 4.91E-01 |
| cg06173720 | 7.77   | 3.84  | 4.30E-02 | 9.56   | 5.47  | 8.05E-02 | 16.26   | 9.71   | 9.38E-02 | 1.92   | 8.97  | 8.31E-01 | 0.96   | 9.42  | 9.19E-01 |
| cg10399484 | 12.68  | 6.27  | 4.30E-02 | 13.89  | 15.47 | 3.69E-01 | 20.43   | 34.26  | 5.51E-01 | 14.00  | 7.35  | 5.67E-02 | -6.13  | 22.81 | 7.88E-01 |
| cg16660274 | 19.63  | 9.70  | 4.30E-02 | 11.74  | 11.73 | 3.17E-01 | 30.82   | 39.78  | 4.38E-01 | 14.53  | 64.94 | 8.23E-01 | 40.32  | 20.04 | 4.42E-02 |
| cg22245446 | -11.06 | 5.46  | 4.30E-02 | -19.86 | 9.31  | 3.30E-02 | -2.53   | 13.11  | 8.47E-01 | -5.33  | 10.74 | 6.19E-01 | -10.75 | 11.56 | 3.52E-01 |
| cg11324219 | 21.48  | 10.61 | 4.30E-02 | 38.89  | 20.63 | 5.93E-02 | 32.45   | 21.39  | 1.29E-01 | -0.17  | 15.04 | 9.91E-01 | 37.51  | 27.55 | 1.73E-01 |
| cg24180402 | 7.87   | 3.89  | 4.30E-02 | 1.67   | 10.93 | 8.79E-01 | -0.38   | 32.00  | 9.90E-01 | 9.73   | 4.72  | 3.92E-02 | 5.87   | 9.16  | 5.21E-01 |
| cg01427313 | -15.62 | 7.72  | 4.30E-02 | -17.80 | 12.12 | 1.42E-01 | 0.58    | 15.67  | 9.71E-01 | -4.64  | 16.52 | 7.79E-01 | -35.47 | 14.50 | 1.44E-02 |
| cg21471828 | -7.79  | 3.85  | 4.30E-02 | -13.50 | 7.99  | 9.11E-02 | -6.65   | 10.33  | 5.20E-01 | -4.71  | 5.39  | 3.83E-01 | -11.16 | 11.12 | 3.15E-01 |
| cg17464815 | 8.21   | 4.06  | 4.30E-02 | 14.88  | 7.91  | 6.01E-02 | 14.07   | 9.80   | 1.51E-01 | 2.97   | 6.34  | 6.39E-01 | 4.29   | 10.26 | 6.76E-01 |
| cg04607235 | -15.48 | 7.65  | 4.30E-02 | -22.97 | 14.26 | 1.07E-01 | -112.29 | 80.78  | 1.65E-01 | -13.24 | 9.74  | 1.74E-01 | 3.56   | 26.08 | 8.91E-01 |
| cg21748201 | -8.65  | 4.27  | 4.30E-02 | -21.46 | 11.22 | 5.58E-02 | 10.53   | 16.59  | 5.26E-01 | -7.40  | 5.16  | 1.52E-01 | -11.29 | 13.34 | 3.97E-01 |
| cg04133132 | 22.10  | 10.92 | 4.30E-02 | 35.49  | 20.12 | 7.77E-02 | 22.49   | 49.72  | 6.51E-01 | 16.19  | 15.23 | 2.88E-01 | 15.62  | 28.95 | 5.89E-01 |
| cg15126021 | -4.92  | 2.43  | 4.30E-02 | -5.07  | 3.61  | 1.61E-01 | -7.76   | 4.93   | 1.16E-01 | -4.89  | 7.37  | 5.07E-01 | -1.08  | 5.47  | 8.43E-01 |
| cg09720012 | 19.50  | 9.64  | 4.30E-02 | 19.82  | 21.89 | 3.65E-01 | 13.73   | 44.15  | 7.56E-01 | 24.11  | 12.07 | 4.57E-02 | -3.07  | 27.72 | 9.12E-01 |

|            |        |       |          |        |       |          |        |        |          |        |       |          |        |       |          |
|------------|--------|-------|----------|--------|-------|----------|--------|--------|----------|--------|-------|----------|--------|-------|----------|
| cg00675891 | -44.94 | 22.21 | 4.30E-02 | -32.59 | 24.59 | 1.85E-01 | 68.63  | 75.87  | 3.66E-01 | -95.06 | 41.77 | 2.28E-02 | -57.66 | 36.19 | 1.11E-01 |
| cg23344523 | 9.37   | 4.63  | 4.30E-02 | 8.11   | 6.55  | 2.15E-01 | 13.97  | 10.11  | 1.67E-01 | 16.28  | 7.32  | 2.62E-02 | -9.69  | 12.10 | 4.23E-01 |
| cg26986596 | 14.81  | 7.32  | 4.30E-02 | 9.71   | 13.24 | 4.63E-01 | 10.94  | 13.51  | 4.18E-01 | 19.54  | 15.95 | 2.21E-01 | 23.68  | 16.75 | 1.58E-01 |
| cg06961086 | 10.48  | 5.18  | 4.30E-02 | 15.35  | 8.24  | 6.25E-02 | 20.46  | 15.76  | 1.94E-01 | 3.71   | 7.98  | 6.42E-01 | 8.49   | 18.77 | 6.51E-01 |
| cg13563863 | 17.92  | 8.86  | 4.30E-02 | 16.92  | 30.54 | 5.79E-01 | 51.98  | 101.20 | 6.07E-01 | 16.27  | 9.64  | 9.16E-02 | 36.83  | 34.85 | 2.91E-01 |
| cg08327367 | 19.59  | 9.68  | 4.30E-02 | 6.34   | 12.28 | 6.05E-01 | 44.53  | 19.06  | 1.95E-02 | 2.50   | 26.91 | 9.26E-01 | 30.08  | 18.82 | 1.10E-01 |
| cg13346459 | 24.51  | 12.11 | 4.30E-02 | 26.32  | 25.32 | 2.99E-01 | 6.21   | 61.84  | 9.20E-01 | 23.65  | 15.70 | 1.32E-01 | 30.25  | 32.60 | 3.53E-01 |
| cg19997662 | 4.84   | 2.39  | 4.30E-02 | 6.09   | 3.53  | 8.45E-02 | 9.31   | 6.38   | 1.44E-01 | 1.41   | 4.82  | 7.70E-01 | 2.51   | 6.05  | 6.78E-01 |
| cg02613624 | 9.89   | 4.89  | 4.30E-02 | 9.62   | 6.74  | 1.54E-01 | 2.32   | 9.84   | 8.14E-01 | 39.30  | 18.47 | 3.33E-02 | 9.35   | 10.29 | 3.63E-01 |
| cg17083575 | 8.81   | 4.35  | 4.30E-02 | 11.77  | 5.93  | 4.73E-02 | 7.51   | 10.61  | 4.79E-01 | 2.98   | 14.00 | 8.31E-01 | 4.68   | 9.83  | 6.34E-01 |
| cg12347480 | 21.37  | 10.56 | 4.30E-02 | 47.70  | 21.16 | 2.42E-02 | -1.74  | 31.72  | 9.56E-01 | 11.47  | 10.07 | 2.55E-01 | 46.27  | 30.88 | 1.34E-01 |
| cg00451651 | -9.13  | 4.51  | 4.30E-02 | -9.20  | 8.19  | 2.61E-01 | -11.27 | 8.90   | 2.05E-01 | -5.36  | 7.98  | 5.02E-01 | -14.40 | 13.03 | 2.69E-01 |
| cg25951981 | 15.39  | 7.61  | 4.30E-02 | 14.23  | 17.87 | 4.26E-01 | 9.82   | 37.25  | 7.92E-01 | 24.28  | 9.15  | 7.94E-03 | -9.57  | 16.88 | 5.71E-01 |
| cg26670985 | 32.48  | 16.05 | 4.30E-02 | 38.52  | 24.25 | 1.12E-01 | 24.36  | 27.82  | 3.81E-01 | 9.46   | 9.38  | 3.13E-01 | 86.55  | 30.27 | 4.24E-03 |
| cg11000292 | 59.04  | 29.18 | 4.30E-02 | 36.99  | 27.50 | 1.79E-01 | 288.05 | 128.07 | 2.45E-02 | 93.15  | 46.52 | 4.53E-02 | 23.84  | 40.26 | 5.54E-01 |
| cg02084561 | -10.26 | 5.07  | 4.31E-02 | -20.90 | 12.99 | 1.08E-01 | -2.26  | 22.24  | 9.19E-01 | -8.66  | 6.03  | 1.51E-01 | -9.49  | 17.11 | 5.79E-01 |
| cg04898810 | 37.96  | 18.76 | 4.31E-02 | 50.83  | 23.35 | 2.95E-02 | 47.99  | 79.48  | 5.46E-01 | 89.55  | 43.35 | 3.89E-02 | 2.88   | 23.47 | 9.02E-01 |
| cg02787772 | 41.90  | 20.71 | 4.31E-02 | 44.74  | 26.06 | 8.60E-02 | -27.86 | 60.22  | 6.44E-01 | 97.16  | 87.20 | 2.65E-01 | 59.14  | 47.06 | 2.09E-01 |
| cg26072123 | -36.21 | 17.90 | 4.31E-02 | -30.63 | 24.56 | 2.12E-01 | -2.13  | 56.62  | 9.70E-01 | -23.55 | 45.46 | 6.04E-01 | -75.15 | 38.70 | 5.22E-02 |
| cg11213248 | 17.00  | 8.40  | 4.31E-02 | -1.62  | 18.33 | 9.30E-01 | 25.97  | 29.43  | 3.78E-01 | 19.34  | 12.99 | 1.37E-01 | 24.59  | 15.60 | 1.15E-01 |
| cg03948048 | 11.42  | 5.65  | 4.31E-02 | 17.64  | 11.67 | 1.31E-01 | 21.43  | 15.45  | 1.66E-01 | 7.45   | 7.48  | 3.19E-01 | 3.02   | 22.58 | 8.94E-01 |
| cg08461705 | 16.57  | 8.19  | 4.31E-02 | 23.12  | 15.19 | 1.28E-01 | 14.68  | 18.97  | 4.39E-01 | 11.50  | 12.54 | 3.59E-01 | 22.97  | 26.42 | 3.85E-01 |
| cg25062184 | 19.71  | 9.74  | 4.31E-02 | -4.13  | 19.60 | 8.33E-01 | 48.12  | 23.88  | 4.40E-02 | 17.83  | 13.00 | 1.70E-01 | 34.29  | 26.56 | 1.97E-01 |
| cg19310148 | -19.41 | 9.60  | 4.31E-02 | -21.45 | 11.32 | 5.80E-02 | -4.52  | 35.37  | 8.98E-01 | 47.44  | 52.33 | 3.65E-01 | -30.22 | 23.03 | 1.89E-01 |
| cg21664636 | -7.95  | 3.93  | 4.31E-02 | -12.56 | 5.38  | 1.97E-02 | 4.35   | 9.66   | 6.53E-01 | -16.65 | 9.54  | 8.09E-02 | -3.87  | 6.19  | 5.32E-01 |
| cg25770340 | 15.80  | 7.81  | 4.31E-02 | 27.71  | 11.77 | 1.86E-02 | -3.43  | 22.46  | 8.78E-01 | 40.28  | 30.19 | 1.82E-01 | 5.87   | 11.54 | 6.11E-01 |
| cg00655706 | 10.64  | 5.26  | 4.31E-02 | 4.02   | 8.32  | 6.29E-01 | 24.60  | 10.37  | 1.77E-02 | 8.68   | 11.84 | 4.64E-01 | 6.82   | 13.80 | 6.21E-01 |
| cg04199303 | -6.71  | 3.32  | 4.31E-02 | -8.50  | 4.65  | 6.75E-02 | -12.15 | 8.80   | 1.68E-01 | 2.43   | 9.11  | 7.90E-01 | -4.53  | 7.13  | 5.25E-01 |
| cg07865418 | -11.24 | 5.55  | 4.31E-02 | -21.62 | 8.63  | 1.22E-02 | 2.33   | 10.44  | 8.24E-01 | -11.02 | 14.07 | 4.33E-01 | -9.67  | 12.21 | 4.28E-01 |
| cg01100868 | 36.14  | 17.86 | 4.31E-02 | 46.10  | 25.53 | 7.10E-02 | 70.20  | 54.58  | 1.98E-01 | 4.26   | 17.37 | 8.06E-01 | 72.27  | 33.39 | 3.05E-02 |
| cg08993681 | 15.88  | 7.85  | 4.31E-02 | 28.61  | 17.69 | 1.06E-01 | -15.36 | 28.26  | 5.87E-01 | 18.97  | 9.78  | 5.23E-02 | -9.86  | 27.53 | 7.20E-01 |
| cg02107842 | 5.68   | 2.81  | 4.31E-02 | 6.46   | 4.26  | 1.29E-01 | 12.72  | 7.28   | 8.04E-02 | 5.56   | 5.14  | 2.80E-01 | -5.76  | 8.15  | 4.80E-01 |
| cg03577433 | -7.14  | 3.53  | 4.31E-02 | -19.08 | 9.04  | 3.48E-02 | -19.75 | 16.59  | 2.34E-01 | -3.81  | 4.22  | 3.67E-01 | -6.58  | 11.06 | 5.52E-01 |
| cg12386297 | -9.32  | 4.61  | 4.31E-02 | -11.95 | 7.81  | 1.26E-01 | -4.81  | 11.14  | 6.66E-01 | -8.93  | 8.55  | 2.97E-01 | -9.14  | 10.53 | 3.85E-01 |
| cg14689532 | 10.49  | 5.19  | 4.31E-02 | 11.72  | 7.72  | 1.29E-01 | 25.38  | 11.39  | 2.58E-02 | 0.18   | 13.35 | 9.90E-01 | 0.95   | 11.15 | 9.32E-01 |

|            |        |       |          |        |       |          |         |        |          |         |       |          |         |       |          |
|------------|--------|-------|----------|--------|-------|----------|---------|--------|----------|---------|-------|----------|---------|-------|----------|
| cg27107685 | 9.64   | 4.77  | 4.31E-02 | 12.27  | 6.84  | 7.30E-02 | 14.17   | 11.04  | 1.99E-01 | 7.36    | 15.15 | 6.27E-01 | 1.40    | 9.94  | 8.88E-01 |
| cg09895190 | 19.41  | 9.59  | 4.31E-02 | 16.92  | 19.75 | 3.92E-01 | 11.68   | 20.17  | 5.63E-01 | 12.32   | 14.95 | 4.10E-01 | 61.10   | 27.03 | 2.38E-02 |
| cg21791158 | -19.50 | 9.64  | 4.31E-02 | -14.66 | 17.98 | 4.15E-01 | -1.35   | 30.10  | 9.64E-01 | -21.22  | 13.86 | 1.26E-01 | -38.82  | 27.22 | 1.54E-01 |
| cg13315471 | 13.71  | 6.78  | 4.31E-02 | 9.16   | 11.83 | 4.39E-01 | 16.96   | 14.38  | 2.38E-01 | 14.85   | 15.46 | 3.37E-01 | 15.84   | 13.35 | 2.35E-01 |
| cg09459714 | -10.23 | 5.06  | 4.31E-02 | -25.72 | 12.83 | 4.51E-02 | -13.99  | 25.26  | 5.80E-01 | -6.74   | 5.93  | 2.56E-01 | -10.02  | 18.20 | 5.82E-01 |
| cg20775307 | -20.95 | 10.36 | 4.31E-02 | 0.97   | 37.28 | 9.79E-01 | -120.50 | 100.44 | 2.30E-01 | -19.73  | 11.25 | 7.93E-02 | -46.93  | 40.92 | 2.51E-01 |
| cg24726466 | -29.80 | 14.73 | 4.31E-02 | -18.91 | 43.06 | 6.61E-01 | -9.66   | 214.75 | 9.64E-01 | -31.22  | 16.45 | 5.77E-02 | -32.88  | 53.46 | 5.39E-01 |
| cg17112182 | 18.52  | 9.16  | 4.31E-02 | 30.36  | 21.88 | 1.65E-01 | 20.91   | 22.83  | 3.60E-01 | 7.72    | 12.14 | 5.25E-01 | 57.09   | 29.64 | 5.41E-02 |
| cg13533151 | 14.83  | 7.33  | 4.31E-02 | 31.97  | 14.11 | 2.35E-02 | 8.10    | 17.56  | 6.45E-01 | 6.62    | 13.92 | 6.34E-01 | 10.60   | 13.89 | 4.46E-01 |
| cg23248150 | 13.39  | 6.62  | 4.31E-02 | 5.02   | 9.79  | 6.08E-01 | 17.53   | 16.28  | 2.82E-01 | 35.12   | 21.83 | 1.08E-01 | 17.38   | 12.38 | 1.60E-01 |
| cg19669340 | 18.29  | 9.04  | 4.31E-02 | 19.97  | 18.20 | 2.73E-01 | 32.15   | 39.76  | 4.19E-01 | 21.83   | 11.89 | 6.62E-02 | -7.66   | 25.82 | 7.67E-01 |
| cg22812516 | 58.49  | 28.92 | 4.31E-02 | 32.26  | 31.80 | 3.10E-01 | 182.87  | 133.01 | 1.69E-01 | 178.18  | 91.80 | 5.22E-02 | 55.09   | 57.33 | 3.37E-01 |
| cg04313565 | 6.03   | 2.98  | 4.31E-02 | 8.71   | 3.85  | 2.39E-02 | 8.40    | 7.13   | 2.39E-01 | -0.92   | 10.63 | 9.31E-01 | -3.91   | 7.76  | 6.14E-01 |
| cg17718182 | -12.81 | 6.33  | 4.31E-02 | -12.33 | 16.51 | 4.55E-01 | 1.14    | 31.09  | 9.71E-01 | -15.98  | 7.35  | 2.98E-02 | 11.77   | 24.07 | 6.25E-01 |
| cg01902758 | 10.54  | 5.21  | 4.31E-02 | 11.87  | 6.88  | 8.44E-02 | 8.55    | 13.36  | 5.22E-01 | 10.92   | 15.06 | 4.68E-01 | 7.24    | 13.28 | 5.86E-01 |
| cg03859090 | 8.30   | 4.10  | 4.31E-02 | 6.46   | 7.55  | 3.93E-01 | -4.05   | 10.66  | 7.04E-01 | 12.00   | 6.17  | 5.19E-02 | 14.66   | 12.09 | 2.25E-01 |
| cg02150820 | 8.76   | 4.33  | 4.31E-02 | 2.41   | 5.70  | 6.73E-01 | 4.80    | 8.76   | 5.84E-01 | 20.97   | 7.80  | 7.19E-03 | 10.07   | 9.05  | 2.66E-01 |
| cg02728342 | 26.91  | 13.30 | 4.32E-02 | 50.92  | 20.08 | 1.12E-02 | 51.40   | 40.51  | 2.05E-01 | 6.99    | 11.01 | 5.26E-01 | 32.28   | 30.99 | 2.98E-01 |
| cg21944224 | 9.10   | 4.50  | 4.32E-02 | 9.20   | 6.96  | 1.86E-01 | -4.75   | 11.23  | 6.73E-01 | 13.93   | 9.68  | 1.50E-01 | 14.63   | 9.93  | 1.41E-01 |
| cg04534276 | -22.47 | 11.11 | 4.32E-02 | -10.81 | 31.77 | 7.34E-01 | -95.67  | 109.71 | 3.83E-01 | -21.96  | 12.40 | 7.65E-02 | -39.61  | 44.07 | 3.69E-01 |
| cg14473327 | 26.79  | 13.25 | 4.32E-02 | 55.89  | 33.53 | 9.56E-02 | 48.54   | 42.02  | 2.48E-01 | 22.97   | 17.99 | 2.02E-01 | 3.90    | 29.45 | 8.95E-01 |
| cg26594419 | -6.35  | 3.14  | 4.32E-02 | -3.11  | 4.57  | 4.95E-01 | -5.16   | 7.44   | 4.87E-01 | -4.43   | 8.50  | 6.02E-01 | -15.72  | 6.80  | 2.07E-02 |
| cg05324618 | 15.77  | 7.80  | 4.32E-02 | 11.19  | 22.91 | 6.25E-01 | 0.48    | 32.20  | 9.88E-01 | 19.26   | 8.98  | 3.19E-02 | -1.38   | 29.39 | 9.62E-01 |
| cg17681034 | 28.67  | 14.18 | 4.32E-02 | 27.42  | 16.93 | 1.05E-01 | 28.02   | 51.29  | 5.85E-01 | 92.35   | 53.47 | 8.41E-02 | 5.24    | 36.40 | 8.85E-01 |
| cg15703070 | -57.00 | 28.19 | 4.32E-02 | -14.89 | 83.45 | 8.58E-01 | 184.80  | 303.08 | 5.42E-01 | -68.25  | 32.49 | 3.57E-02 | -44.41  | 79.93 | 5.79E-01 |
| cg17677988 | -11.05 | 5.47  | 4.32E-02 | -15.20 | 16.08 | 3.44E-01 | 5.65    | 26.02  | 8.28E-01 | -12.45  | 6.27  | 4.70E-02 | -0.87   | 19.46 | 9.64E-01 |
| cg22289810 | 20.92  | 10.34 | 4.32E-02 | 1.84   | 11.44 | 8.72E-01 | 40.85   | 18.18  | 2.47E-02 | 51.90   | 31.10 | 9.51E-02 | 20.19   | 13.60 | 1.38E-01 |
| cg09006487 | 8.34   | 4.13  | 4.32E-02 | 8.34   | 5.94  | 1.60E-01 | 10.99   | 9.92   | 2.68E-01 | 8.78    | 13.86 | 5.26E-01 | 6.40    | 8.14  | 4.32E-01 |
| cg27187669 | -62.60 | 30.96 | 4.32E-02 | -27.95 | 33.15 | 3.99E-01 | 146.85  | 181.13 | 4.18E-01 | -114.72 | 63.14 | 6.92E-02 | -105.25 | 48.99 | 3.17E-02 |
| cg26888463 | 17.68  | 8.74  | 4.32E-02 | 20.61  | 10.46 | 4.87E-02 | 2.85    | 28.99  | 9.22E-01 | 35.23   | 51.33 | 4.92E-01 | 10.97   | 20.59 | 5.94E-01 |
| cg07216133 | 9.60   | 4.75  | 4.32E-02 | 5.62   | 5.23  | 2.82E-01 | 22.49   | 8.04   | 5.17E-03 | 1.36    | 19.22 | 9.43E-01 | 3.33    | 10.77 | 7.57E-01 |
| cg07264124 | 21.00  | 10.39 | 4.32E-02 | 22.21  | 13.73 | 1.06E-01 | -24.82  | 55.62  | 6.55E-01 | 7.76    | 32.68 | 8.12E-01 | 28.70   | 19.24 | 1.36E-01 |
| cg22162757 | -6.54  | 3.23  | 4.32E-02 | -12.11 | 5.05  | 1.65E-02 | -4.94   | 8.64   | 5.68E-01 | -1.09   | 6.08  | 8.58E-01 | -3.46   | 7.90  | 6.61E-01 |
| cg12152651 | 16.07  | 7.95  | 4.32E-02 | 17.58  | 11.93 | 1.41E-01 | 20.22   | 17.66  | 2.52E-01 | 39.96   | 27.49 | 1.46E-01 | 3.08    | 15.28 | 8.40E-01 |
| cg16803522 | 30.09  | 14.88 | 4.32E-02 | 23.58  | 49.53 | 6.34E-01 | -18.02  | 169.24 | 9.15E-01 | 35.60   | 16.75 | 3.35E-02 | -0.17   | 44.49 | 9.97E-01 |

|                  |        |       |          |        |       |          |        |        |          |        |       |          |        |       |          |
|------------------|--------|-------|----------|--------|-------|----------|--------|--------|----------|--------|-------|----------|--------|-------|----------|
| cg06107469       | 34.72  | 17.17 | 4.32E-02 | -12.75 | 52.99 | 8.10E-01 | 23.99  | 180.69 | 8.94E-01 | 41.97  | 19.21 | 2.89E-02 | 26.53  | 58.17 | 6.48E-01 |
| cg05310260       | -54.19 | 26.80 | 4.32E-02 | -42.89 | 37.74 | 2.56E-01 | 93.88  | 133.91 | 4.83E-01 | -67.97 | 60.78 | 2.63E-01 | -88.49 | 52.47 | 9.17E-02 |
| cg05582165       | 38.03  | 18.81 | 4.32E-02 | 21.46  | 23.14 | 3.54E-01 | 84.75  | 66.25  | 2.01E-01 | 71.06  | 66.93 | 2.88E-01 | 63.54  | 44.41 | 1.53E-01 |
| cg24479522       | -11.85 | 5.86  | 4.32E-02 | -14.81 | 7.19  | 3.96E-02 | -9.73  | 18.68  | 6.03E-01 | 2.56   | 40.43 | 9.50E-01 | -5.15  | 12.61 | 6.83E-01 |
| cg24757159       | -7.35  | 3.63  | 4.32E-02 | -10.75 | 6.65  | 1.06E-01 | -2.67  | 7.72   | 7.29E-01 | -5.91  | 6.75  | 3.82E-01 | -9.64  | 8.33  | 2.47E-01 |
| cg10219995       | -9.05  | 4.48  | 4.32E-02 | -13.65 | 7.79  | 7.97E-02 | -5.51  | 11.62  | 6.35E-01 | -6.22  | 8.40  | 4.59E-01 | -8.26  | 9.20  | 3.70E-01 |
| cg14418756       | 4.32   | 2.13  | 4.32E-02 | 4.71   | 3.18  | 1.38E-01 | 4.70   | 4.51   | 2.98E-01 | 3.64   | 6.61  | 5.82E-01 | 3.44   | 4.55  | 4.49E-01 |
| cg03808027       | 20.66  | 10.22 | 4.32E-02 | 11.15  | 22.37 | 6.18E-01 | 40.12  | 45.44  | 3.77E-01 | 17.18  | 12.77 | 1.79E-01 | 53.01  | 32.33 | 1.01E-01 |
| cg21813473       | -41.46 | 20.51 | 4.32E-02 | -92.88 | 52.69 | 7.79E-02 | 78.10  | 161.22 | 6.28E-01 | -46.55 | 19.14 | 1.50E-02 | 32.88  | 57.12 | 5.65E-01 |
| cg16896326       | 20.41  | 10.10 | 4.32E-02 | 19.83  | 15.29 | 1.94E-01 | 7.37   | 30.67  | 8.10E-01 | 19.61  | 19.57 | 3.16E-01 | 30.34  | 23.22 | 1.91E-01 |
| cg03145963       | 31.26  | 15.47 | 4.32E-02 | 36.33  | 21.04 | 8.42E-02 | 31.52  | 53.49  | 5.56E-01 | -39.78 | 51.03 | 4.36E-01 | 44.51  | 29.00 | 1.25E-01 |
| cg25411977       | 16.13  | 7.98  | 4.32E-02 | 11.58  | 16.35 | 4.79E-01 | 18.25  | 18.16  | 3.15E-01 | 11.66  | 11.25 | 3.00E-01 | 61.09  | 31.28 | 5.08E-02 |
| cg16396223       | -11.91 | 5.89  | 4.32E-02 | -21.10 | 8.94  | 1.82E-02 | 0.60   | 14.53  | 9.67E-01 | -10.56 | 12.46 | 3.97E-01 | -2.70  | 13.99 | 8.47E-01 |
| cg14270725       | -6.32  | 3.12  | 4.32E-02 | -8.53  | 4.60  | 6.37E-02 | -2.34  | 7.13   | 7.43E-01 | -1.88  | 7.30  | 7.97E-01 | -9.70  | 7.72  | 2.09E-01 |
| cg07486085       | -8.18  | 4.05  | 4.32E-02 | 1.30   | 8.79  | 8.82E-01 | -4.28  | 15.96  | 7.89E-01 | -11.54 | 5.24  | 2.75E-02 | -10.19 | 11.38 | 3.71E-01 |
| cg26133091       | -7.54  | 3.73  | 4.32E-02 | -8.54  | 5.22  | 1.02E-01 | -7.80  | 9.34   | 4.04E-01 | 0.05   | 9.53  | 9.96E-01 | -10.99 | 8.85  | 2.15E-01 |
| cg23781334       | 14.59  | 7.22  | 4.32E-02 | 19.45  | 10.42 | 6.20E-02 | 19.78  | 17.72  | 2.64E-01 | -15.99 | 26.03 | 5.39E-01 | 11.57  | 13.72 | 3.99E-01 |
| cg22035229       | -6.27  | 3.10  | 4.32E-02 | -10.66 | 6.42  | 9.71E-02 | -4.11  | 9.58   | 6.68E-01 | -6.07  | 4.04  | 1.33E-01 | 3.06   | 11.50 | 7.90E-01 |
| cg12279076       | 19.30  | 9.55  | 4.32E-02 | 18.78  | 15.97 | 2.40E-01 | 14.56  | 17.67  | 4.10E-01 | 8.17   | 22.91 | 7.21E-01 | 39.15  | 22.72 | 8.49E-02 |
| cg03902450       | -7.96  | 3.94  | 4.32E-02 | -6.37  | 6.13  | 2.98E-01 | -9.97  | 8.19   | 2.23E-01 | -16.02 | 10.17 | 1.15E-01 | -3.03  | 8.66  | 7.26E-01 |
| cg14121282       | 8.53   | 4.22  | 4.32E-02 | 7.23   | 5.73  | 2.07E-01 | 13.43  | 9.71   | 1.66E-01 | 16.92  | 12.15 | 1.64E-01 | 0.20   | 10.96 | 9.85E-01 |
| cg04036593       | 7.34   | 3.63  | 4.33E-02 | 9.44   | 4.81  | 4.97E-02 | -3.24  | 7.12   | 6.49E-01 | 5.92   | 10.08 | 5.57E-01 | 14.71  | 7.11  | 3.87E-02 |
| cg16760587       | 6.93   | 3.43  | 4.33E-02 | 5.89   | 4.53  | 1.94E-01 | 16.50  | 8.95   | 6.52E-02 | 12.26  | 11.08 | 2.69E-01 | -0.20  | 7.97  | 9.80E-01 |
| cg27201457       | 51.39  | 25.43 | 4.33E-02 | 63.77  | 34.09 | 6.14E-02 | 107.18 | 61.21  | 7.99E-02 | -57.61 | 67.20 | 3.91E-01 | 53.36  | 40.27 | 1.85E-01 |
| ch.11.110379701F | -41.92 | 20.74 | 4.33E-02 | -38.88 | 25.23 | 1.23E-01 | -88.95 | 86.14  | 3.02E-01 | 47.63  | 88.17 | 5.89E-01 | -62.28 | 45.21 | 1.68E-01 |
| cg14705155       | -14.77 | 7.31  | 4.33E-02 | -12.98 | 19.43 | 5.04E-01 | -74.81 | 47.70  | 1.17E-01 | -10.80 | 8.51  | 2.04E-01 | -33.15 | 23.50 | 1.58E-01 |
| cg15829006       | 21.41  | 10.59 | 4.33E-02 | 38.88  | 14.61 | 7.76E-03 | 3.40   | 28.65  | 9.06E-01 | 24.85  | 19.43 | 2.01E-01 | -6.36  | 21.95 | 7.72E-01 |
| cg19672497       | -32.34 | 16.00 | 4.33E-02 | -37.57 | 20.91 | 7.23E-02 | 14.30  | 67.37  | 8.32E-01 | -0.85  | 79.21 | 9.91E-01 | -35.03 | 28.42 | 2.18E-01 |
| cg08849635       | 12.02  | 5.95  | 4.33E-02 | 10.55  | 9.04  | 2.43E-01 | -0.53  | 16.79  | 9.75E-01 | 11.01  | 11.47 | 3.37E-01 | 26.32  | 14.29 | 6.55E-02 |
| cg20227471       | 27.14  | 13.43 | 4.33E-02 | 28.82  | 19.14 | 1.32E-01 | 43.00  | 29.19  | 1.41E-01 | -12.64 | 40.68 | 7.56E-01 | 27.94  | 31.05 | 3.68E-01 |
| cg13038618       | 8.97   | 4.44  | 4.33E-02 | 6.31   | 7.00  | 3.67E-01 | 12.08  | 9.92   | 2.24E-01 | 5.30   | 9.55  | 5.79E-01 | 15.73  | 10.38 | 1.30E-01 |
| cg25016907       | 30.04  | 14.87 | 4.33E-02 | 42.65  | 34.81 | 2.20E-01 | 20.42  | 145.03 | 8.88E-01 | 20.78  | 17.82 | 2.44E-01 | 68.12  | 44.52 | 1.26E-01 |
| cg12967218       | -11.46 | 5.67  | 4.33E-02 | -8.08  | 10.12 | 4.25E-01 | -16.80 | 15.57  | 2.80E-01 | -17.58 | 8.54  | 3.96E-02 | 9.38   | 16.91 | 5.79E-01 |
| cg10546065       | 9.03   | 4.47  | 4.33E-02 | 4.23   | 6.04  | 4.84E-01 | 23.21  | 11.75  | 4.82E-02 | 8.82   | 13.76 | 5.22E-01 | 12.01  | 9.94  | 2.27E-01 |
| cg05506594       | 15.59  | 7.71  | 4.33E-02 | 23.62  | 12.49 | 5.86E-02 | 11.54  | 14.80  | 4.35E-01 | -3.68  | 16.90 | 8.28E-01 | 30.40  | 20.73 | 1.42E-01 |

|            |        |       |          |        |       |          |        |        |          |        |       |          |        |       |          |
|------------|--------|-------|----------|--------|-------|----------|--------|--------|----------|--------|-------|----------|--------|-------|----------|
| cg20953187 | 16.86  | 8.34  | 4.33E-02 | 13.82  | 18.43 | 4.53E-01 | 50.54  | 21.04  | 1.63E-02 | 3.45   | 11.34 | 7.61E-01 | 18.74  | 11.52 | 1.04E-01 |
| cg04529078 | -11.42 | 5.65  | 4.33E-02 | -18.91 | 12.92 | 1.43E-01 | -0.46  | 18.24  | 9.80E-01 | -12.82 | 7.24  | 7.68E-02 | 0.40   | 17.50 | 9.82E-01 |
| cg21142033 | -14.91 | 7.38  | 4.33E-02 | -14.50 | 23.43 | 5.36E-01 | -25.37 | 29.11  | 3.83E-01 | -19.05 | 12.39 | 1.24E-01 | -10.55 | 10.63 | 3.21E-01 |
| cg00306728 | 15.34  | 7.59  | 4.33E-02 | 18.36  | 16.88 | 2.77E-01 | 22.96  | 26.89  | 3.93E-01 | 9.72   | 9.89  | 3.26E-01 | 31.54  | 21.13 | 1.35E-01 |
| cg24265360 | -29.19 | 14.45 | 4.33E-02 | -64.44 | 53.49 | 2.28E-01 | 23.11  | 203.23 | 9.09E-01 | -23.38 | 15.61 | 1.34E-01 | -70.16 | 56.53 | 2.15E-01 |
| cg19130313 | 12.00  | 5.94  | 4.33E-02 | 27.84  | 11.98 | 2.01E-02 | 5.68   | 33.48  | 8.65E-01 | 5.93   | 7.23  | 4.12E-01 | 20.62  | 27.32 | 4.50E-01 |
| cg18885540 | 26.25  | 12.99 | 4.33E-02 | 7.48   | 18.51 | 6.86E-01 | 44.79  | 30.98  | 1.48E-01 | 23.09  | 35.23 | 5.12E-01 | 59.00  | 29.36 | 4.45E-02 |
| cg17786864 | 17.60  | 8.71  | 4.33E-02 | 22.42  | 14.24 | 1.15E-01 | 20.78  | 21.26  | 3.28E-01 | 9.57   | 18.02 | 5.95E-01 | 15.56  | 18.39 | 3.98E-01 |
| cg26292173 | -19.60 | 9.70  | 4.33E-02 | -42.64 | 17.78 | 1.65E-02 | -9.75  | 19.88  | 6.24E-01 | -7.31  | 8.02  | 3.62E-01 | -40.46 | 23.84 | 8.97E-02 |
| cg13295549 | 14.86  | 7.36  | 4.33E-02 | 42.00  | 21.86 | 5.46E-02 | -1.37  | 31.01  | 9.65E-01 | 10.31  | 8.32  | 2.15E-01 | 43.49  | 33.26 | 1.91E-01 |
| cg14384416 | -8.23  | 4.07  | 4.33E-02 | -10.80 | 6.23  | 8.26E-02 | -17.82 | 11.00  | 1.05E-01 | 2.11   | 8.28  | 7.99E-01 | -8.66  | 9.28  | 3.51E-01 |
| cg07181881 | 10.88  | 5.38  | 4.33E-02 | 14.18  | 8.02  | 7.71E-02 | 8.90   | 14.95  | 5.52E-01 | 21.52  | 18.54 | 2.46E-01 | 4.54   | 9.29  | 6.25E-01 |
| cg14498460 | 14.47  | 7.16  | 4.33E-02 | 8.89   | 10.60 | 4.02E-01 | 16.55  | 13.55  | 2.22E-01 | -22.83 | 34.04 | 5.02E-01 | 30.85  | 15.25 | 4.31E-02 |
| cg13581785 | 39.17  | 19.39 | 4.33E-02 | 55.07  | 54.78 | 3.15E-01 | 49.98  | 250.65 | 8.42E-01 | 38.63  | 22.47 | 8.55E-02 | 25.89  | 55.04 | 6.38E-01 |
| cg24250684 | -7.70  | 3.81  | 4.33E-02 | -0.28  | 7.07  | 9.68E-01 | -7.18  | 13.11  | 5.84E-01 | -10.83 | 5.76  | 6.02E-02 | -12.18 | 8.83  | 1.68E-01 |
| cg04896437 | -13.88 | 6.87  | 4.33E-02 | -26.76 | 10.98 | 1.48E-02 | -3.10  | 13.63  | 8.20E-01 | -10.11 | 20.14 | 6.16E-01 | -6.03  | 14.07 | 6.68E-01 |
| cg06033387 | 20.21  | 10.00 | 4.33E-02 | 6.24   | 19.03 | 7.43E-01 | 55.75  | 40.46  | 1.68E-01 | 22.24  | 14.74 | 1.31E-01 | 23.91  | 22.23 | 2.82E-01 |
| cg00172603 | 9.21   | 4.56  | 4.33E-02 | 22.14  | 11.01 | 4.43E-02 | 7.49   | 22.03  | 7.34E-01 | 3.71   | 5.93  | 5.31E-01 | 14.86  | 10.32 | 1.50E-01 |
| cg02860543 | 11.84  | 5.86  | 4.33E-02 | 14.15  | 6.47  | 2.86E-02 | -9.64  | 27.25  | 7.23E-01 | 6.62   | 40.22 | 8.69E-01 | 4.69   | 17.54 | 7.89E-01 |
| cg13746414 | 29.11  | 14.41 | 4.33E-02 | 20.73  | 12.43 | 9.54E-02 | 48.43  | 27.53  | 7.85E-02 | -50.29 | 48.62 | 3.01E-01 | 51.93  | 21.44 | 1.55E-02 |
| cg02853322 | -29.29 | 14.50 | 4.33E-02 | -26.85 | 42.90 | 5.31E-01 | -31.26 | 203.27 | 8.78E-01 | -31.77 | 16.28 | 5.11E-02 | -10.05 | 48.86 | 8.37E-01 |
| cg03084901 | 31.98  | 15.83 | 4.33E-02 | 28.17  | 20.61 | 1.72E-01 | -6.04  | 27.55  | 8.27E-01 | 84.75  | 35.83 | 1.80E-02 | 40.16  | 26.84 | 1.35E-01 |
| cg18670721 | 32.01  | 15.84 | 4.33E-02 | 41.55  | 19.24 | 3.08E-02 | 18.03  | 56.06  | 7.48E-01 | 34.75  | 57.88 | 5.48E-01 | -1.33  | 38.79 | 9.73E-01 |
| cg01770333 | 12.93  | 6.40  | 4.33E-02 | 3.80   | 8.42  | 6.52E-01 | 35.23  | 35.34  | 3.19E-01 | 10.03  | 6.78  | 1.39E-01 | 34.65  | 13.76 | 1.18E-02 |
| cg07757281 | -8.43  | 4.17  | 4.34E-02 | -7.02  | 10.51 | 5.04E-01 | -1.28  | 19.76  | 9.48E-01 | -6.93  | 5.05  | 1.70E-01 | -21.86 | 12.25 | 7.42E-02 |
| cg24778241 | 32.74  | 16.20 | 4.34E-02 | 10.12  | 40.43 | 8.02E-01 | -92.24 | 135.18 | 4.95E-01 | 42.14  | 19.26 | 2.87E-02 | 22.26  | 47.33 | 6.38E-01 |
| cg01607269 | 15.41  | 7.63  | 4.34E-02 | 2.78   | 16.87 | 8.69E-01 | -1.31  | 19.71  | 9.47E-01 | 21.68  | 10.15 | 3.28E-02 | 34.47  | 26.75 | 1.98E-01 |
| cg12940181 | 5.12   | 2.54  | 4.34E-02 | 4.94   | 3.32  | 1.37E-01 | 9.08   | 6.87   | 1.87E-01 | 10.53  | 7.10  | 1.38E-01 | -2.24  | 6.50  | 7.30E-01 |
| cg07931844 | -12.13 | 6.00  | 4.34E-02 | -5.58  | 9.37  | 5.52E-01 | -14.22 | 17.20  | 4.08E-01 | -15.16 | 12.11 | 2.11E-01 | -19.75 | 12.75 | 1.21E-01 |
| cg18463876 | -10.46 | 5.18  | 4.34E-02 | -11.35 | 8.30  | 1.71E-01 | -16.97 | 12.54  | 1.76E-01 | -5.15  | 10.87 | 6.36E-01 | -9.27  | 11.18 | 4.07E-01 |
| cg04488487 | 16.78  | 8.31  | 4.34E-02 | 25.96  | 13.44 | 5.34E-02 | 3.08   | 17.27  | 8.59E-01 | 20.27  | 19.55 | 3.00E-01 | 12.08  | 18.31 | 5.09E-01 |
| cg15201536 | 23.29  | 11.53 | 4.34E-02 | 36.08  | 23.41 | 1.23E-01 | 16.83  | 39.79  | 6.72E-01 | 10.12  | 16.33 | 5.35E-01 | 46.10  | 27.53 | 9.41E-02 |
| cg26913058 | 2.41   | 1.19  | 4.34E-02 | 2.18   | 1.64  | 1.84E-01 | 0.98   | 2.66   | 7.13E-01 | 2.47   | 3.88  | 5.24E-01 | 4.72   | 2.85  | 9.74E-02 |
| cg03479527 | 12.78  | 6.33  | 4.34E-02 | 21.76  | 10.32 | 3.50E-02 | 18.99  | 13.99  | 1.75E-01 | 12.30  | 8.16  | 1.31E-01 | -15.46 | 17.05 | 3.65E-01 |
| cg10055566 | 9.07   | 4.49  | 4.34E-02 | 4.56   | 6.78  | 5.01E-01 | 4.72   | 13.13  | 7.19E-01 | 17.02  | 10.60 | 1.08E-01 | 13.04  | 8.71  | 1.34E-01 |

|            |        |       |          |        |       |          |         |        |          |        |       |          |         |       |          |
|------------|--------|-------|----------|--------|-------|----------|---------|--------|----------|--------|-------|----------|---------|-------|----------|
| cg11813810 | -6.13  | 3.04  | 4.34E-02 | -9.74  | 5.33  | 6.74E-02 | -16.41  | 12.68  | 1.96E-01 | -3.44  | 4.24  | 4.17E-01 | -2.50   | 9.32  | 7.89E-01 |
| cg12602633 | 11.45  | 5.67  | 4.34E-02 | 14.54  | 7.87  | 6.48E-02 | -10.07  | 24.41  | 6.80E-01 | 11.56  | 25.11 | 6.45E-01 | 10.27   | 9.24  | 2.66E-01 |
| cg10418598 | -51.65 | 25.57 | 4.34E-02 | -89.80 | 68.47 | 1.90E-01 | -217.37 | 268.17 | 4.18E-01 | -36.57 | 29.85 | 2.21E-01 | -87.68  | 74.54 | 2.39E-01 |
| cg10371050 | -9.67  | 4.79  | 4.34E-02 | -10.99 | 13.28 | 4.08E-01 | 15.04   | 19.40  | 4.38E-01 | -11.07 | 5.67  | 5.08E-02 | -13.25  | 15.55 | 3.94E-01 |
| cg08739115 | 11.26  | 5.58  | 4.34E-02 | 15.11  | 12.34 | 2.21E-01 | 13.42   | 16.45  | 4.15E-01 | 11.84  | 7.18  | 9.93E-02 | -6.27   | 19.88 | 7.52E-01 |
| cg18816877 | 25.92  | 12.83 | 4.34E-02 | 14.99  | 49.06 | 7.60E-01 | -157.58 | 213.39 | 4.60E-01 | 22.79  | 14.00 | 1.04E-01 | 71.93   | 43.30 | 9.67E-02 |
| cg20707345 | 20.16  | 9.98  | 4.34E-02 | 26.46  | 18.96 | 1.63E-01 | 51.00   | 20.38  | 1.23E-02 | 7.56   | 9.45  | 4.24E-01 | 11.36   | 29.24 | 6.98E-01 |
| cg23247337 | -22.27 | 11.03 | 4.34E-02 | -23.73 | 18.31 | 1.95E-01 | 13.21   | 36.54  | 7.18E-01 | -38.09 | 21.09 | 7.09E-02 | -16.34  | 21.11 | 4.39E-01 |
| cg06915165 | -46.53 | 23.04 | 4.34E-02 | -34.96 | 21.86 | 1.10E-01 | -42.40  | 82.10  | 6.05E-01 | 34.81  | 77.89 | 6.55E-01 | -113.17 | 45.92 | 1.37E-02 |
| cg14189141 | 12.09  | 5.99  | 4.34E-02 | 42.22  | 18.46 | 2.22E-02 | 7.67    | 28.52  | 7.88E-01 | 7.70   | 7.06  | 2.75E-01 | 11.78   | 13.24 | 3.73E-01 |
| cg12359384 | -19.89 | 9.85  | 4.34E-02 | -10.63 | 16.51 | 5.20E-01 | -46.40  | 35.48  | 1.91E-01 | -30.31 | 9.58  | 1.55E-03 | 13.02   | 23.71 | 5.83E-01 |
| cg27131958 | 29.90  | 14.81 | 4.34E-02 | 18.12  | 16.69 | 2.78E-01 | 57.70   | 42.50  | 1.75E-01 | -15.93 | 47.79 | 7.39E-01 | 66.93   | 30.56 | 2.85E-02 |
| cg06873218 | 9.08   | 4.50  | 4.34E-02 | 6.86   | 6.32  | 2.78E-01 | 16.37   | 10.25  | 1.10E-01 | 21.90  | 17.89 | 2.21E-01 | 4.53    | 9.20  | 6.22E-01 |
| cg16808455 | 20.14  | 9.97  | 4.34E-02 | 18.35  | 18.82 | 3.30E-01 | 3.39    | 23.01  | 8.83E-01 | 24.53  | 17.92 | 1.71E-01 | 30.43   | 21.16 | 1.50E-01 |
| cg04717211 | 12.48  | 6.18  | 4.34E-02 | -1.01  | 19.70 | 9.59E-01 | 35.50   | 22.25  | 1.11E-01 | 10.29  | 6.98  | 1.40E-01 | 44.81   | 31.15 | 1.50E-01 |
| cg04399647 | 68.71  | 34.02 | 4.34E-02 | 97.98  | 51.54 | 5.73E-02 | 298.75  | 190.60 | 1.17E-01 | 13.18  | 95.51 | 8.90E-01 | 36.56   | 53.42 | 4.94E-01 |
| cg06541093 | -10.47 | 5.19  | 4.34E-02 | -11.81 | 7.87  | 1.33E-01 | -7.89   | 12.46  | 5.27E-01 | -17.11 | 12.81 | 1.82E-01 | -5.14   | 10.84 | 6.36E-01 |
| cg24090938 | 16.20  | 8.02  | 4.34E-02 | 11.92  | 14.06 | 3.96E-01 | 18.28   | 14.53  | 2.08E-01 | 9.42   | 18.15 | 6.04E-01 | 28.13   | 19.20 | 1.43E-01 |
| cg15771416 | -16.45 | 8.14  | 4.34E-02 | -17.48 | 15.89 | 2.71E-01 | -8.65   | 20.05  | 6.66E-01 | -26.59 | 12.14 | 2.85E-02 | 12.57   | 23.29 | 5.89E-01 |
| cg15576918 | -11.35 | 5.62  | 4.34E-02 | -15.13 | 9.48  | 1.11E-01 | -10.65  | 12.59  | 3.97E-01 | -12.19 | 15.31 | 4.26E-01 | -7.21   | 10.03 | 4.72E-01 |
| cg04635671 | 24.38  | 12.07 | 4.34E-02 | 65.79  | 47.68 | 1.68E-01 | -146.95 | 136.49 | 2.82E-01 | 21.23  | 12.95 | 1.01E-01 | 48.16   | 49.43 | 3.30E-01 |
| cg12647496 | -20.92 | 10.36 | 4.34E-02 | -29.84 | 14.79 | 4.36E-02 | -29.53  | 29.88  | 3.23E-01 | -2.77  | 9.02  | 7.59E-01 | -41.50  | 18.41 | 2.42E-02 |
| cg13809627 | 14.39  | 7.13  | 4.34E-02 | 15.90  | 9.90  | 1.08E-01 | 6.10    | 39.42  | 8.77E-01 | 15.06  | 11.26 | 1.81E-01 | -1.48   | 32.25 | 9.63E-01 |
| cg18972765 | -9.23  | 4.57  | 4.34E-02 | -15.80 | 6.37  | 1.32E-02 | -4.88   | 10.82  | 6.52E-01 | -1.13  | 14.58 | 9.38E-01 | -0.60   | 9.99  | 9.52E-01 |
| cg24479137 | -11.63 | 5.76  | 4.34E-02 | -16.30 | 13.98 | 2.44E-01 | -13.67  | 21.43  | 5.24E-01 | -10.49 | 6.96  | 1.32E-01 | -9.45   | 21.40 | 6.59E-01 |
| cg15059371 | 11.15  | 5.52  | 4.35E-02 | 17.36  | 9.83  | 7.75E-02 | 31.17   | 19.45  | 1.09E-01 | 6.69   | 8.41  | 4.26E-01 | 1.61    | 13.30 | 9.04E-01 |
| cg05627557 | 5.06   | 2.51  | 4.35E-02 | 3.19   | 3.34  | 3.39E-01 | 13.52   | 7.17   | 5.93E-02 | 7.71   | 6.24  | 2.17E-01 | 2.39    | 6.42  | 7.09E-01 |
| cg03923285 | 5.14   | 2.55  | 4.35E-02 | 8.76   | 3.11  | 4.87E-03 | 2.23    | 5.42   | 6.81E-01 | -4.09  | 6.46  | 5.27E-01 | 6.14    | 4.77  | 1.98E-01 |
| cg08179530 | -37.77 | 18.70 | 4.35E-02 | -41.84 | 48.94 | 3.93E-01 | -292.80 | 173.61 | 9.17E-02 | -32.19 | 22.78 | 1.58E-01 | -39.01  | 45.62 | 3.92E-01 |
| cg13751548 | -8.44  | 4.18  | 4.35E-02 | 2.77   | 7.28  | 7.04E-01 | -5.62   | 10.26  | 5.84E-01 | -12.45 | 4.72  | 8.39E-03 | -16.68  | 9.15  | 6.84E-02 |
| cg14012686 | 10.43  | 5.17  | 4.35E-02 | 13.53  | 7.10  | 5.67E-02 | 13.77   | 10.99  | 2.10E-01 | -10.46 | 17.75 | 5.56E-01 | 6.74    | 12.72 | 5.96E-01 |
| cg18622494 | -39.63 | 19.63 | 4.35E-02 | -48.82 | 26.07 | 6.11E-02 | -19.73  | 57.01  | 7.29E-01 | -54.14 | 72.03 | 4.52E-01 | -23.28  | 40.06 | 5.61E-01 |
| cg19560547 | 26.97  | 13.36 | 4.35E-02 | 53.14  | 36.96 | 1.51E-01 | 74.88   | 176.61 | 6.72E-01 | 25.74  | 15.01 | 8.64E-02 | -10.81  | 49.77 | 8.28E-01 |
| cg25937148 | -28.02 | 13.88 | 4.35E-02 | -55.69 | 24.27 | 2.17E-02 | -16.76  | 48.76  | 7.31E-01 | -5.18  | 16.08 | 7.47E-01 | -46.43  | 26.41 | 7.88E-02 |
| cg12759909 | -12.75 | 6.31  | 4.35E-02 | -11.10 | 9.86  | 2.60E-01 | 3.38    | 17.22  | 8.44E-01 | -19.19 | 12.63 | 1.29E-01 | -18.74  | 13.92 | 1.78E-01 |



|            |        |       |          |        |       |          |         |        |          |        |       |          |        |       |          |
|------------|--------|-------|----------|--------|-------|----------|---------|--------|----------|--------|-------|----------|--------|-------|----------|
| cg20667211 | -38.12 | 18.88 | 4.35E-02 | -55.41 | 58.08 | 3.40E-01 | -288.60 | 285.29 | 3.12E-01 | -34.17 | 20.75 | 9.96E-02 | -43.76 | 75.82 | 5.64E-01 |
| cg21181756 | 34.83  | 17.25 | 4.35E-02 | 5.87   | 24.93 | 8.14E-01 | 64.91   | 67.90  | 3.39E-01 | 46.40  | 42.72 | 2.77E-01 | 68.98  | 31.82 | 3.02E-02 |
| cg25844590 | 4.64   | 2.30  | 4.35E-02 | 4.89   | 3.24  | 1.32E-01 | 3.73    | 5.38   | 4.88E-01 | 6.39   | 4.92  | 1.93E-01 | 1.13   | 7.33  | 8.77E-01 |
| cg22138216 | 14.75  | 7.30  | 4.35E-02 | 22.89  | 21.11 | 2.78E-01 | 30.68   | 23.41  | 1.90E-01 | 13.56  | 8.55  | 1.13E-01 | -16.66 | 31.78 | 6.00E-01 |
| cg24495044 | 10.38  | 5.14  | 4.35E-02 | 22.66  | 12.75 | 7.56E-02 | -3.23   | 12.73  | 7.99E-01 | 9.16   | 6.75  | 1.75E-01 | 20.39  | 16.83 | 2.25E-01 |
| cg11795222 | 17.40  | 8.62  | 4.35E-02 | 37.97  | 16.06 | 1.81E-02 | 4.80    | 20.10  | 8.11E-01 | 3.71   | 15.74 | 8.14E-01 | 19.59  | 18.02 | 2.77E-01 |
| cg09695734 | -16.39 | 8.12  | 4.35E-02 | -36.31 | 14.53 | 1.25E-02 | -26.24  | 19.39  | 1.76E-01 | -4.14  | 8.21  | 6.14E-01 | -13.96 | 17.36 | 4.21E-01 |
| cg17818731 | 9.35   | 4.63  | 4.35E-02 | 9.55   | 6.55  | 1.45E-01 | 8.14    | 10.21  | 4.25E-01 | -0.61  | 12.69 | 9.61E-01 | 18.54  | 11.54 | 1.08E-01 |
| cg26578149 | 10.27  | 5.09  | 4.35E-02 | 6.65   | 7.30  | 3.63E-01 | 15.85   | 11.21  | 1.57E-01 | 17.34  | 13.19 | 1.89E-01 | 7.51   | 12.74 | 5.56E-01 |
| cg04609694 | 4.62   | 2.29  | 4.35E-02 | 4.00   | 2.84  | 1.60E-01 | 13.21   | 5.36   | 1.37E-02 | 2.40   | 4.59  | 6.01E-01 | 0.12   | 5.80  | 9.84E-01 |
| cg19283264 | 18.88  | 9.35  | 4.35E-02 | 32.66  | 12.03 | 6.64E-03 | 4.69    | 21.03  | 8.24E-01 | 33.85  | 18.67 | 6.98E-02 | -0.18  | 14.16 | 9.90E-01 |
| cg11471772 | 13.15  | 6.51  | 4.35E-02 | 2.99   | 12.48 | 8.10E-01 | 12.04   | 17.79  | 4.99E-01 | 7.88   | 11.50 | 4.93E-01 | 30.00  | 12.46 | 1.61E-02 |
| cg20667782 | -28.05 | 13.89 | 4.35E-02 | -25.07 | 17.64 | 1.55E-01 | -80.12  | 45.18  | 7.62E-02 | -15.45 | 36.72 | 6.74E-01 | -19.07 | 36.86 | 6.05E-01 |
| cg02405329 | 18.81  | 9.32  | 4.35E-02 | -9.40  | 18.62 | 6.14E-01 | 30.35   | 18.14  | 9.44E-02 | 22.39  | 14.82 | 1.31E-01 | 34.09  | 22.56 | 1.31E-01 |
| cg10541674 | -26.29 | 13.03 | 4.35E-02 | -48.82 | 50.06 | 3.29E-01 | -115.77 | 174.18 | 5.06E-01 | -25.20 | 14.09 | 7.36E-02 | -11.01 | 48.74 | 8.21E-01 |
| cg11404751 | -8.56  | 4.24  | 4.35E-02 | -15.98 | 8.19  | 5.10E-02 | -5.43   | 10.25  | 5.96E-01 | -7.98  | 7.18  | 2.67E-01 | -2.65  | 9.21  | 7.74E-01 |
| cg14364859 | 17.84  | 8.84  | 4.35E-02 | 24.58  | 10.63 | 2.07E-02 | -9.02   | 26.37  | 7.32E-01 | -3.06  | 63.53 | 9.62E-01 | 10.83  | 21.03 | 6.07E-01 |
| cg11143876 | 17.11  | 8.48  | 4.35E-02 | 12.23  | 13.80 | 3.75E-01 | 16.05   | 14.88  | 2.81E-01 | 38.72  | 22.55 | 8.60E-02 | 11.57  | 21.42 | 5.89E-01 |
| cg25672097 | -5.75  | 2.85  | 4.35E-02 | -7.33  | 4.97  | 1.40E-01 | 1.32    | 5.42   | 8.07E-01 | -9.05  | 5.50  | 9.97E-02 | -10.12 | 8.03  | 2.07E-01 |
| cg13468680 | 19.01  | 9.42  | 4.35E-02 | 29.86  | 15.72 | 5.74E-02 | 11.41   | 19.42  | 5.57E-01 | 2.52   | 18.03 | 8.89E-01 | 36.89  | 25.79 | 1.53E-01 |
| cg21245453 | -38.88 | 19.26 | 4.35E-02 | -52.10 | 23.23 | 2.49E-02 | 56.16   | 109.19 | 6.07E-01 | 30.54  | 69.16 | 6.59E-01 | -35.20 | 42.71 | 4.10E-01 |
| cg12448003 | 21.03  | 10.42 | 4.35E-02 | 22.56  | 17.59 | 2.00E-01 | 28.09   | 45.13  | 5.34E-01 | 23.63  | 32.72 | 4.70E-01 | 18.65  | 14.82 | 2.08E-01 |
| cg02346706 | -10.76 | 5.33  | 4.36E-02 | -19.46 | 8.34  | 1.97E-02 | 1.11    | 13.13  | 9.33E-01 | -9.49  | 12.60 | 4.51E-01 | -5.23  | 10.71 | 6.25E-01 |
| cg18582824 | 16.19  | 8.02  | 4.36E-02 | 30.34  | 14.13 | 3.17E-02 | 8.57    | 19.75  | 6.64E-01 | 8.71   | 14.09 | 5.37E-01 | 11.53  | 18.48 | 5.33E-01 |
| cg01453551 | 19.10  | 9.46  | 4.36E-02 | 51.30  | 21.58 | 1.74E-02 | -2.84   | 26.94  | 9.16E-01 | 12.53  | 9.58  | 1.91E-01 | 27.83  | 27.53 | 3.12E-01 |
| cg09199250 | -12.95 | 6.42  | 4.36E-02 | -14.77 | 9.73  | 1.29E-01 | 8.39    | 14.72  | 5.69E-01 | -27.24 | 13.25 | 3.99E-02 | -13.05 | 12.72 | 3.05E-01 |
| cg13192938 | 18.35  | 9.09  | 4.36E-02 | 24.35  | 18.73 | 1.94E-01 | 48.36   | 21.42  | 2.40E-02 | 5.38   | 12.67 | 6.71E-01 | 14.61  | 24.96 | 5.58E-01 |
| cg17128767 | -8.19  | 4.06  | 4.36E-02 | -13.72 | 9.87  | 1.65E-01 | -8.96   | 18.43  | 6.27E-01 | -6.73  | 4.94  | 1.72E-01 | -8.31  | 12.44 | 5.04E-01 |
| cg21923959 | -7.24  | 3.59  | 4.36E-02 | -4.35  | 7.19  | 5.45E-01 | -3.19   | 10.06  | 7.51E-01 | -6.93  | 4.99  | 1.65E-01 | -19.95 | 10.84 | 6.59E-02 |
| cg08337623 | 34.98  | 17.33 | 4.36E-02 | -8.30  | 60.87 | 8.92E-01 | -71.64  | 220.70 | 7.45E-01 | 42.02  | 18.78 | 2.52E-02 | 4.83   | 70.45 | 9.45E-01 |
| cg16927872 | 14.86  | 7.36  | 4.36E-02 | 5.49   | 12.58 | 6.63E-01 | -16.38  | 27.41  | 5.50E-01 | 22.13  | 11.41 | 5.25E-02 | 29.27  | 17.90 | 1.02E-01 |
| cg18303215 | 14.75  | 7.31  | 4.36E-02 | 30.09  | 14.99 | 4.47E-02 | 15.36   | 23.18  | 5.08E-01 | 8.65   | 11.83 | 4.65E-01 | 9.83   | 13.78 | 4.76E-01 |
| cg19865896 | 16.44  | 8.15  | 4.36E-02 | 22.66  | 16.56 | 1.71E-01 | 6.61    | 18.92  | 7.27E-01 | 14.11  | 11.89 | 2.35E-01 | 30.15  | 25.39 | 2.35E-01 |
| cg00364001 | 20.95  | 10.38 | 4.36E-02 | 30.11  | 20.53 | 1.43E-01 | -2.64   | 20.55  | 8.98E-01 | 18.68  | 19.34 | 3.34E-01 | 42.56  | 23.17 | 6.62E-02 |
| cg04623088 | 34.39  | 17.04 | 4.36E-02 | -5.38  | 29.71 | 8.56E-01 | 120.84  | 94.95  | 2.03E-01 | 35.41  | 12.38 | 4.24E-03 | 87.01  | 45.99 | 5.85E-02 |

|            |        |       |          |        |       |          |         |        |          |        |       |          |        |       |          |
|------------|--------|-------|----------|--------|-------|----------|---------|--------|----------|--------|-------|----------|--------|-------|----------|
| cg00764632 | 14.07  | 6.97  | 4.36E-02 | 18.53  | 13.52 | 1.70E-01 | 19.24   | 27.36  | 4.82E-01 | 8.28   | 8.82  | 3.47E-01 | 62.13  | 33.39 | 6.28E-02 |
| cg06169746 | -10.09 | 5.00  | 4.36E-02 | -6.45  | 7.40  | 3.84E-01 | -0.76   | 11.95  | 9.49E-01 | -14.35 | 13.47 | 2.87E-01 | -21.83 | 10.41 | 3.60E-02 |
| cg06774893 | -12.87 | 6.38  | 4.36E-02 | -15.59 | 9.65  | 1.06E-01 | -9.38   | 17.19  | 5.85E-01 | -4.43  | 16.46 | 7.88E-01 | -14.91 | 12.16 | 2.20E-01 |
| cg19571127 | -26.90 | 13.33 | 4.36E-02 | -6.25  | 39.18 | 8.73E-01 | 212.65  | 174.82 | 2.24E-01 | -31.85 | 14.86 | 3.21E-02 | -24.30 | 49.15 | 6.21E-01 |
| cg15148028 | 47.78  | 23.68 | 4.36E-02 | 75.19  | 35.25 | 3.29E-02 | 79.08   | 82.11  | 3.35E-01 | 0.47   | 53.43 | 9.93E-01 | 26.69  | 45.63 | 5.59E-01 |
| cg18313182 | 6.15   | 3.05  | 4.36E-02 | 5.11   | 3.62  | 1.59E-01 | 16.84   | 8.70   | 5.27E-02 | 8.45   | 12.56 | 5.01E-01 | -0.24  | 9.10  | 9.79E-01 |
| cg21947116 | 18.45  | 9.14  | 4.36E-02 | 20.97  | 20.00 | 2.94E-01 | 24.18   | 18.47  | 1.90E-01 | 4.75   | 13.80 | 7.31E-01 | 56.76  | 27.99 | 4.26E-02 |
| cg12764689 | -9.97  | 4.94  | 4.36E-02 | -4.98  | 12.49 | 6.90E-01 | -31.85  | 28.50  | 2.64E-01 | -9.78  | 5.79  | 9.11E-02 | -13.13 | 17.05 | 4.41E-01 |
| cg24555639 | 13.77  | 6.83  | 4.36E-02 | 5.07   | 11.20 | 6.51E-01 | 23.02   | 13.67  | 9.21E-02 | 22.95  | 14.56 | 1.15E-01 | 6.94   | 17.08 | 6.85E-01 |
| cg19005210 | 7.04   | 3.49  | 4.36E-02 | 8.18   | 5.04  | 1.04E-01 | 13.81   | 8.92   | 1.21E-01 | 2.96   | 8.18  | 7.17E-01 | 2.50   | 8.11  | 7.58E-01 |
| cg05943077 | -9.62  | 4.77  | 4.36E-02 | -18.02 | 8.97  | 4.46E-02 | -5.53   | 10.74  | 6.07E-01 | -4.11  | 8.28  | 6.20E-01 | -11.02 | 10.99 | 3.16E-01 |
| cg01433527 | 17.82  | 8.83  | 4.36E-02 | 33.09  | 17.22 | 5.46E-02 | 20.99   | 20.76  | 3.12E-01 | 5.06   | 8.39  | 5.46E-01 | 42.51  | 23.81 | 7.41E-02 |
| cg00529236 | 15.32  | 7.59  | 4.36E-02 | 20.08  | 13.45 | 1.35E-01 | 7.15    | 13.31  | 5.91E-01 | -0.63  | 17.98 | 9.72E-01 | 37.87  | 18.05 | 3.59E-02 |
| cg07725983 | -9.33  | 4.62  | 4.36E-02 | -13.62 | 9.46  | 1.50E-01 | -2.89   | 10.76  | 7.89E-01 | -8.61  | 7.10  | 2.25E-01 | -12.40 | 11.83 | 2.95E-01 |
| cg00336291 | 20.18  | 10.00 | 4.36E-02 | 2.39   | 18.26 | 8.96E-01 | 14.83   | 20.90  | 4.78E-01 | 35.32  | 17.77 | 4.68E-02 | 31.65  | 25.49 | 2.14E-01 |
| cg04147741 | 13.21  | 6.55  | 4.36E-02 | 6.83   | 14.38 | 6.35E-01 | -7.56   | 19.86  | 7.04E-01 | 17.00  | 8.46  | 4.46E-02 | 28.65  | 22.43 | 2.02E-01 |
| cg05979597 | 10.52  | 5.21  | 4.36E-02 | 6.20   | 7.64  | 4.17E-01 | 6.93    | 12.76  | 5.87E-01 | 15.97  | 13.13 | 2.24E-01 | 18.84  | 11.37 | 9.77E-02 |
| cg03988161 | 28.40  | 14.08 | 4.36E-02 | -13.45 | 45.19 | 7.66E-01 | -12.05  | 148.60 | 9.35E-01 | 29.43  | 15.42 | 5.63E-02 | 87.54  | 57.28 | 1.26E-01 |
| cg08879684 | -14.06 | 6.97  | 4.36E-02 | -15.81 | 18.24 | 3.86E-01 | 9.45    | 40.55  | 8.16E-01 | -15.84 | 8.07  | 4.96E-02 | -2.72  | 24.93 | 9.13E-01 |
| cg19898128 | 17.04  | 8.45  | 4.36E-02 | 20.99  | 32.67 | 5.21E-01 | 38.77   | 108.14 | 7.20E-01 | 15.86  | 9.36  | 9.01E-02 | 22.07  | 25.17 | 3.81E-01 |
| cg09578463 | -32.48 | 16.10 | 4.36E-02 | -21.85 | 52.15 | 6.75E-01 | -256.40 | 214.85 | 2.33E-01 | -29.52 | 17.88 | 9.88E-02 | -56.80 | 54.07 | 2.94E-01 |
| cg21531775 | -8.27  | 4.10  | 4.36E-02 | -10.00 | 6.55  | 1.27E-01 | -5.54   | 5.81   | 3.40E-01 | -16.63 | 5.78  | 4.05E-03 | 5.73   | 9.39  | 5.42E-01 |
| cg22803407 | -28.67 | 14.21 | 4.36E-02 | -36.16 | 17.77 | 4.19E-02 | 62.72   | 82.97  | 4.50E-01 | -68.52 | 64.45 | 2.88E-01 | -14.36 | 26.74 | 5.91E-01 |
| cg06095296 | 20.84  | 10.33 | 4.36E-02 | 31.99  | 19.52 | 1.01E-01 | 19.76   | 19.52  | 3.11E-01 | 3.70   | 13.21 | 7.80E-01 | 56.20  | 26.72 | 3.54E-02 |
| cg04567738 | -4.39  | 2.17  | 4.36E-02 | -0.46  | 3.47  | 8.95E-01 | -5.98   | 4.90   | 2.23E-01 | -5.47  | 4.78  | 2.53E-01 | -9.27  | 4.80  | 5.34E-02 |
| cg10357060 | 29.43  | 14.59 | 4.36E-02 | 43.81  | 20.58 | 3.32E-02 | 19.12   | 38.25  | 6.17E-01 | 4.79   | 38.42 | 9.01E-01 | 18.96  | 31.97 | 5.53E-01 |
| cg15266121 | -35.64 | 17.66 | 4.36E-02 | -72.30 | 63.74 | 2.57E-01 | -52.26  | 32.08  | 1.03E-01 | -36.71 | 18.77 | 5.05E-02 | 72.81  | 65.15 | 2.64E-01 |
| cg12201779 | 10.13  | 5.02  | 4.36E-02 | 7.15   | 5.73  | 2.12E-01 | 3.74    | 8.57   | 6.63E-01 | 29.12  | 9.42  | 2.00E-03 | 5.33   | 7.26  | 4.62E-01 |
| cg17340391 | 11.07  | 5.49  | 4.36E-02 | 18.19  | 7.17  | 1.12E-02 | -7.53   | 11.19  | 5.01E-01 | 12.65  | 13.59 | 3.52E-01 | 13.72  | 9.15  | 1.34E-01 |
| cg23333820 | -44.32 | 21.97 | 4.36E-02 | -35.89 | 32.89 | 2.75E-01 | 38.10   | 112.50 | 7.35E-01 | -56.40 | 41.62 | 1.75E-01 | -59.24 | 45.10 | 1.89E-01 |
| cg00305281 | 11.58  | 5.74  | 4.36E-02 | 16.66  | 8.53  | 5.07E-02 | 23.76   | 14.47  | 1.00E-01 | 2.34   | 13.71 | 8.65E-01 | -0.56  | 12.40 | 9.64E-01 |
| cg23301462 | -9.04  | 4.48  | 4.36E-02 | -19.86 | 6.43  | 2.01E-03 | -5.47   | 9.46   | 5.63E-01 | -7.01  | 5.30  | 1.86E-01 | 2.52   | 9.97  | 8.00E-01 |
| cg23742217 | -11.11 | 5.51  | 4.36E-02 | -24.99 | 8.99  | 5.42E-03 | -7.68   | 10.77  | 4.76E-01 | -2.49  | 6.07  | 6.81E-01 | -14.53 | 11.91 | 2.22E-01 |
| cg12416561 | 13.06  | 6.47  | 4.36E-02 | 15.25  | 8.30  | 6.62E-02 | 20.62   | 23.35  | 3.77E-01 | -12.37 | 19.54 | 5.26E-01 | 17.30  | 14.26 | 2.25E-01 |
| cg06271561 | -10.63 | 5.27  | 4.37E-02 | -15.22 | 8.43  | 7.11E-02 | -7.90   | 11.58  | 4.95E-01 | -8.64  | 14.04 | 5.38E-01 | -7.02  | 10.30 | 4.96E-01 |

|            |        |       |          |        |       |          |         |        |          |        |        |          |         |       |          |
|------------|--------|-------|----------|--------|-------|----------|---------|--------|----------|--------|--------|----------|---------|-------|----------|
| cg13079247 | -11.16 | 5.53  | 4.37E-02 | -15.99 | 12.21 | 1.91E-01 | -42.40  | 34.04  | 2.13E-01 | -7.80  | 6.63   | 2.39E-01 | -18.29  | 20.51 | 3.72E-01 |
| cg12451676 | 23.43  | 11.61 | 4.37E-02 | 21.83  | 27.63 | 4.30E-01 | -25.96  | 119.91 | 8.29E-01 | 17.80  | 13.56  | 1.89E-01 | 84.03   | 40.95 | 4.02E-02 |
| cg03765692 | 16.77  | 8.31  | 4.37E-02 | -23.06 | 25.06 | 3.57E-01 | 13.87   | 52.77  | 7.93E-01 | 22.88  | 9.45   | 1.55E-02 | 13.85   | 27.50 | 6.14E-01 |
| cg07849384 | 19.85  | 9.84  | 4.37E-02 | 20.07  | 14.12 | 1.55E-01 | 30.02   | 25.98  | 2.48E-01 | 36.51  | 32.07  | 2.55E-01 | 8.54    | 18.69 | 6.48E-01 |
| cg00225576 | -22.45 | 11.13 | 4.37E-02 | -31.79 | 48.26 | 5.10E-01 | -57.44  | 181.65 | 7.52E-01 | -20.23 | 11.79  | 8.62E-02 | -48.90  | 49.11 | 3.19E-01 |
| cg26736450 | 32.38  | 16.05 | 4.37E-02 | 24.54  | 18.95 | 1.95E-01 | 23.81   | 91.16  | 7.94E-01 | 93.00  | 63.09  | 1.40E-01 | 42.95   | 37.16 | 2.48E-01 |
| cg20962543 | -40.68 | 20.16 | 4.37E-02 | -9.78  | 19.74 | 6.20E-01 | -27.89  | 36.26  | 4.42E-01 | -46.25 | 33.22  | 1.64E-01 | -101.95 | 35.32 | 3.90E-03 |
| cg12469001 | -11.52 | 5.71  | 4.37E-02 | -15.66 | 8.81  | 7.55E-02 | -8.55   | 14.22  | 5.48E-01 | -11.60 | 15.88  | 4.65E-01 | -7.13   | 10.61 | 5.02E-01 |
| cg12072028 | 4.05   | 2.01  | 4.37E-02 | 4.55   | 2.84  | 1.09E-01 | 4.71    | 3.96   | 2.34E-01 | -3.60  | 7.04   | 6.09E-01 | 5.30    | 4.99  | 2.88E-01 |
| cg05493509 | -13.14 | 6.51  | 4.37E-02 | -34.01 | 16.31 | 3.71E-02 | -9.81   | 23.31  | 6.74E-01 | -9.54  | 7.93   | 2.29E-01 | -5.82   | 22.01 | 7.92E-01 |
| cg15888087 | 32.73  | 16.23 | 4.37E-02 | 40.17  | 21.17 | 5.78E-02 | 10.80   | 45.19  | 8.11E-01 | 42.56  | 45.36  | 3.48E-01 | 14.77   | 41.09 | 7.19E-01 |
| cg08632810 | 9.63   | 4.78  | 4.37E-02 | 18.72  | 5.27  | 3.77E-04 | 9.70    | 8.72   | 2.66E-01 | 6.14   | 9.76   | 5.29E-01 | -0.25   | 6.99  | 9.72E-01 |
| cg10699171 | -4.99  | 2.47  | 4.37E-02 | -4.09  | 3.32  | 2.18E-01 | -11.79  | 6.42   | 6.63E-02 | 0.56   | 7.21   | 9.38E-01 | -5.80   | 5.86  | 3.23E-01 |
| cg02994974 | 20.74  | 10.28 | 4.37E-02 | 24.02  | 16.08 | 1.35E-01 | -26.64  | 33.76  | 4.30E-01 | 16.85  | 21.02  | 4.23E-01 | 36.10   | 20.19 | 7.38E-02 |
| cg10133177 | -10.20 | 5.06  | 4.37E-02 | -18.61 | 11.59 | 1.08E-01 | -27.86  | 23.96  | 2.45E-01 | -6.14  | 6.13   | 3.16E-01 | -14.59  | 17.35 | 4.00E-01 |
| cg07152216 | 12.23  | 6.07  | 4.37E-02 | 24.87  | 14.41 | 8.43E-02 | 3.54    | 17.10  | 8.36E-01 | 8.72   | 8.84   | 3.24E-01 | 14.48   | 12.76 | 2.56E-01 |
| cg06398473 | -15.78 | 7.83  | 4.37E-02 | 2.35   | 18.56 | 8.99E-01 | -2.89   | 24.39  | 9.06E-01 | -17.13 | 7.89   | 3.00E-02 | -51.77  | 25.07 | 3.89E-02 |
| cg00289084 | 30.68  | 15.21 | 4.37E-02 | 42.28  | 19.70 | 3.19E-02 | -3.78   | 59.04  | 9.49E-01 | 32.40  | 40.69  | 4.26E-01 | 6.08    | 34.20 | 8.59E-01 |
| cg23357708 | 10.69  | 5.30  | 4.37E-02 | 14.07  | 7.08  | 4.68E-02 | 8.33    | 13.99  | 5.51E-01 | 8.98   | 17.18  | 6.01E-01 | 3.74    | 11.82 | 7.52E-01 |
| cg13082157 | -28.48 | 14.12 | 4.37E-02 | -85.33 | 44.39 | 5.46E-02 | 109.26  | 206.09 | 5.96E-01 | -20.63 | 15.60  | 1.86E-01 | -46.09  | 51.55 | 3.71E-01 |
| cg23533419 | 15.84  | 7.85  | 4.37E-02 | 21.11  | 11.49 | 6.62E-02 | 6.98    | 20.68  | 7.36E-01 | 29.81  | 25.39  | 2.40E-01 | 7.23    | 14.51 | 6.18E-01 |
| cg26651722 | 17.11  | 8.48  | 4.37E-02 | 12.76  | 14.33 | 3.73E-01 | 1.58    | 16.59  | 9.24E-01 | 27.14  | 18.62  | 1.45E-01 | 36.41   | 19.93 | 6.77E-02 |
| cg08483560 | -15.15 | 7.51  | 4.37E-02 | -4.92  | 18.74 | 7.93E-01 | -17.59  | 25.55  | 4.91E-01 | -12.23 | 9.20   | 1.84E-01 | -54.12  | 25.52 | 3.39E-02 |
| cg22288637 | 24.81  | 12.30 | 4.37E-02 | 15.20  | 15.63 | 3.31E-01 | 80.64   | 52.48  | 1.24E-01 | 46.80  | 73.39  | 5.24E-01 | 32.42   | 22.54 | 1.50E-01 |
| cg20955693 | -45.62 | 22.62 | 4.37E-02 | -49.47 | 32.27 | 1.25E-01 | 29.66   | 83.69  | 7.23E-01 | -54.87 | 46.18  | 2.35E-01 | -52.75  | 51.13 | 3.02E-01 |
| cg19258784 | 19.87  | 9.85  | 4.37E-02 | 20.11  | 15.60 | 1.97E-01 | 33.17   | 32.39  | 3.06E-01 | 32.16  | 22.65  | 1.56E-01 | 8.43    | 17.44 | 6.29E-01 |
| cg03965739 | -14.95 | 7.41  | 4.37E-02 | -16.86 | 13.33 | 2.06E-01 | -22.28  | 15.55  | 1.52E-01 | -9.87  | 14.18  | 4.86E-01 | -10.38  | 16.99 | 5.41E-01 |
| cg17185060 | -33.23 | 16.47 | 4.37E-02 | -2.30  | 16.73 | 8.91E-01 | -28.96  | 33.61  | 3.89E-01 | -54.04 | 32.77  | 9.92E-02 | -60.78  | 20.93 | 3.69E-03 |
| cg05965863 | 10.87  | 5.39  | 4.37E-02 | 20.90  | 8.63  | 1.54E-02 | 5.04    | 14.53  | 7.28E-01 | 10.89  | 10.26  | 2.88E-01 | -3.59   | 11.69 | 7.59E-01 |
| cg07846220 | 9.03   | 4.48  | 4.37E-02 | 17.55  | 11.75 | 1.35E-01 | -0.33   | 13.02  | 9.80E-01 | 12.95  | 7.31   | 7.67E-02 | 4.61    | 7.45  | 5.36E-01 |
| cg22000725 | -31.41 | 15.57 | 4.37E-02 | -26.73 | 44.90 | 5.52E-01 | -224.44 | 194.93 | 2.50E-01 | -24.22 | 17.79  | 1.73E-01 | -76.89  | 47.72 | 1.07E-01 |
| cg13339771 | -12.54 | 6.22  | 4.37E-02 | -12.57 | 15.82 | 4.27E-01 | -20.17  | 23.92  | 3.99E-01 | -10.34 | 7.42   | 1.64E-01 | -26.03  | 22.56 | 2.48E-01 |
| cg21986781 | 103.10 | 51.12 | 4.37E-02 | 126.41 | 78.93 | 1.09E-01 | 230.36  | 180.54 | 2.02E-01 | 154.15 | 122.22 | 2.07E-01 | 14.22   | 89.64 | 8.74E-01 |
| cg19589680 | 22.80  | 11.31 | 4.37E-02 | 17.06  | 16.94 | 3.14E-01 | 43.91   | 22.62  | 5.22E-02 | 5.57   | 28.94  | 8.47E-01 | 22.24   | 29.00 | 4.43E-01 |
| cg27211696 | -4.15  | 2.06  | 4.37E-02 | -6.41  | 2.68  | 1.68E-02 | -1.25   | 4.65   | 7.89E-01 | -3.10  | 11.97  | 7.96E-01 | -0.20   | 4.78  | 9.66E-01 |

|               |        |       |          |        |       |          |        |        |          |        |       |          |        |       |          |
|---------------|--------|-------|----------|--------|-------|----------|--------|--------|----------|--------|-------|----------|--------|-------|----------|
| cg23262036    | 12.89  | 6.39  | 4.37E-02 | 11.36  | 8.49  | 1.81E-01 | 22.43  | 18.11  | 2.15E-01 | 26.29  | 37.57 | 4.84E-01 | 10.35  | 12.07 | 3.91E-01 |
| cg12024811    | -13.87 | 6.88  | 4.37E-02 | -23.27 | 10.80 | 3.12E-02 | 0.58   | 15.86  | 9.71E-01 | -5.85  | 17.03 | 7.31E-01 | -14.73 | 13.94 | 2.91E-01 |
| cg18842353    | -8.63  | 4.28  | 4.37E-02 | -12.68 | 6.67  | 5.73E-02 | -2.08  | 10.39  | 8.41E-01 | 2.00   | 9.85  | 8.39E-01 | -14.96 | 8.93  | 9.39E-02 |
| cg22889887    | -8.19  | 4.06  | 4.37E-02 | 0.37   | 7.03  | 9.58E-01 | -14.94 | 8.59   | 8.21E-02 | -8.62  | 8.00  | 2.81E-01 | -14.85 | 9.42  | 1.15E-01 |
| cg20769997    | -31.18 | 15.46 | 4.37E-02 | -38.39 | 17.46 | 2.79E-02 | -22.29 | 30.94  | 4.71E-01 | -5.89  | 8.80  | 5.03E-01 | -71.34 | 23.11 | 2.03E-03 |
| cg09086761    | -35.99 | 17.85 | 4.37E-02 | -45.91 | 23.24 | 4.82E-02 | -22.65 | 61.02  | 7.11E-01 | -6.52  | 59.54 | 9.13E-01 | -27.22 | 36.82 | 4.60E-01 |
| cg17782974    | 8.11   | 4.02  | 4.38E-02 | 12.56  | 5.65  | 2.62E-02 | 4.08   | 8.43   | 6.29E-01 | 15.57  | 18.53 | 4.01E-01 | 0.38   | 8.60  | 9.65E-01 |
| cg07937239    | -26.71 | 13.25 | 4.38E-02 | -7.18  | 37.78 | 8.49E-01 | -98.37 | 169.03 | 5.61E-01 | -27.88 | 14.88 | 6.09E-02 | -39.95 | 47.45 | 4.00E-01 |
| cg02019171    | 11.85  | 5.88  | 4.38E-02 | 5.14   | 9.01  | 5.68E-01 | 16.39  | 10.89  | 1.32E-01 | 29.19  | 18.19 | 1.09E-01 | 10.29  | 13.90 | 4.59E-01 |
| cg22226438    | -13.96 | 6.92  | 4.38E-02 | -7.95  | 10.51 | 4.50E-01 | -3.71  | 27.13  | 8.91E-01 | -17.06 | 14.32 | 2.34E-01 | -23.52 | 13.40 | 7.92E-02 |
| cg11970133    | 16.93  | 8.40  | 4.38E-02 | 16.71  | 20.45 | 4.14E-01 | 24.68  | 21.85  | 2.59E-01 | 20.25  | 11.03 | 6.63E-02 | -12.20 | 26.02 | 6.39E-01 |
| cg06786804    | 13.58  | 6.74  | 4.38E-02 | 16.32  | 16.78 | 3.31E-01 | -18.34 | 19.99  | 3.59E-01 | 19.19  | 7.95  | 1.58E-02 | 9.41   | 21.01 | 6.54E-01 |
| cg17866404    | 21.91  | 10.86 | 4.38E-02 | 20.94  | 18.40 | 2.55E-01 | 9.19   | 20.69  | 6.57E-01 | 12.39  | 16.18 | 4.44E-01 | 69.02  | 27.81 | 1.31E-02 |
| cg01401336    | -10.17 | 5.05  | 4.38E-02 | -14.99 | 8.60  | 8.14E-02 | 6.49   | 17.69  | 7.14E-01 | -9.60  | 7.02  | 1.71E-01 | -10.05 | 20.94 | 6.31E-01 |
| cg06895953    | -9.33  | 4.63  | 4.38E-02 | -12.26 | 10.19 | 2.29E-01 | 6.81   | 13.15  | 6.05E-01 | -9.13  | 6.60  | 1.67E-01 | -17.63 | 10.93 | 1.07E-01 |
| cg18616243    | 37.63  | 18.67 | 4.38E-02 | 13.41  | 23.98 | 5.76E-01 | 98.62  | 79.45  | 2.14E-01 | 101.04 | 53.32 | 5.81E-02 | 46.99  | 35.33 | 1.83E-01 |
| cg01663008    | 12.44  | 6.17  | 4.38E-02 | 13.71  | 12.32 | 2.66E-01 | 20.40  | 28.05  | 4.67E-01 | 9.63   | 8.12  | 2.36E-01 | 19.76  | 17.49 | 2.58E-01 |
| cg16007456    | 24.90  | 12.35 | 4.38E-02 | 75.27  | 45.92 | 1.01E-01 | 3.47   | 23.88  | 8.84E-01 | 29.15  | 16.20 | 7.20E-02 | 20.03  | 43.80 | 6.47E-01 |
| ch.1.2435132F | -17.97 | 8.91  | 4.38E-02 | -22.67 | 13.65 | 9.68E-02 | -10.03 | 18.29  | 5.84E-01 | -30.75 | 27.41 | 2.62E-01 | -11.60 | 18.58 | 5.32E-01 |
| cg26988138    | 6.72   | 3.33  | 4.38E-02 | 12.27  | 6.21  | 4.79E-02 | 10.12  | 7.69   | 1.88E-01 | 4.04   | 6.22  | 5.16E-01 | 0.52   | 6.84  | 9.40E-01 |
| cg20525183    | 20.13  | 9.99  | 4.38E-02 | 15.70  | 23.88 | 5.11E-01 | -9.06  | 71.90  | 9.00E-01 | 25.67  | 12.06 | 3.33E-02 | -0.28  | 28.77 | 9.92E-01 |
| cg13634994    | -8.14  | 4.04  | 4.38E-02 | -14.29 | 8.01  | 7.43E-02 | 3.86   | 14.16  | 7.85E-01 | -9.34  | 5.41  | 8.44E-02 | 3.59   | 12.36 | 7.72E-01 |
| cg10391540    | 27.12  | 13.45 | 4.38E-02 | 25.57  | 20.51 | 2.13E-01 | 76.40  | 26.14  | 3.47E-03 | 11.14  | 8.62  | 1.96E-01 | 17.93  | 29.76 | 5.47E-01 |
| cg19693158    | 15.18  | 7.53  | 4.38E-02 | 30.47  | 14.58 | 3.66E-02 | 14.12  | 15.56  | 3.64E-01 | 9.63   | 12.18 | 4.29E-01 | 0.52   | 22.06 | 9.81E-01 |
| cg03427317    | -13.89 | 6.89  | 4.38E-02 | -19.40 | 21.99 | 3.78E-01 | 7.48   | 25.80  | 7.72E-01 | -14.08 | 7.74  | 6.90E-02 | -35.86 | 35.34 | 3.10E-01 |
| cg08045981    | -7.99  | 3.97  | 4.38E-02 | -12.70 | 5.65  | 2.46E-02 | -6.34  | 8.55   | 4.59E-01 | -13.29 | 15.03 | 3.77E-01 | 2.49   | 8.41  | 7.67E-01 |
| cg26608332    | 12.66  | 6.28  | 4.38E-02 | 18.28  | 11.20 | 1.03E-01 | 21.04  | 12.24  | 8.55E-02 | 10.58  | 12.80 | 4.08E-01 | -6.42  | 14.71 | 6.63E-01 |
| cg17372022    | -9.09  | 4.51  | 4.38E-02 | -8.57  | 7.91  | 2.78E-01 | -12.53 | 13.58  | 3.56E-01 | -6.38  | 6.63  | 3.35E-01 | -19.30 | 14.12 | 1.72E-01 |
| cg13005329    | 15.98  | 7.93  | 4.38E-02 | 16.02  | 19.22 | 4.05E-01 | -3.33  | 20.94  | 8.74E-01 | 23.54  | 10.28 | 2.21E-02 | -2.71  | 26.03 | 9.17E-01 |
| cg01705934    | 13.75  | 6.82  | 4.38E-02 | 16.44  | 10.69 | 1.24E-01 | -3.72  | 17.16  | 8.28E-01 | 16.70  | 16.85 | 3.21E-01 | 18.10  | 13.10 | 1.67E-01 |
| cg08951958    | 12.78  | 6.34  | 4.38E-02 | 21.93  | 14.02 | 1.18E-01 | 10.76  | 16.71  | 5.20E-01 | 9.22   | 8.25  | 2.64E-01 | 21.32  | 25.66 | 4.06E-01 |
| cg10328538    | -9.46  | 4.69  | 4.38E-02 | -25.59 | 11.01 | 2.01E-02 | -12.51 | 13.43  | 3.52E-01 | -4.48  | 6.16  | 4.68E-01 | -5.92  | 13.76 | 6.67E-01 |
| cg14841879    | 22.27  | 11.05 | 4.38E-02 | 23.08  | 15.75 | 1.43E-01 | 3.59   | 28.98  | 9.02E-01 | 32.51  | 28.74 | 2.58E-01 | 25.98  | 23.82 | 2.75E-01 |
| cg01845583    | 11.97  | 5.94  | 4.38E-02 | 1.54   | 10.52 | 8.84E-01 | 33.35  | 46.07  | 4.69E-01 | 14.72  | 7.95  | 6.42E-02 | 25.43  | 18.16 | 1.61E-01 |
| cg06592027    | -9.23  | 4.58  | 4.38E-02 | -14.63 | 7.73  | 5.85E-02 | 3.69   | 11.18  | 7.41E-01 | -7.14  | 8.64  | 4.09E-01 | -13.46 | 10.19 | 1.87E-01 |

|            |        |       |          |        |       |          |         |        |          |        |       |          |        |       |          |
|------------|--------|-------|----------|--------|-------|----------|---------|--------|----------|--------|-------|----------|--------|-------|----------|
| cg04290779 | -25.66 | 12.73 | 4.38E-02 | -44.28 | 48.90 | 3.65E-01 | 10.40   | 213.15 | 9.61E-01 | -27.10 | 13.80 | 4.95E-02 | 4.87   | 45.76 | 9.15E-01 |
| cg10874403 | -11.88 | 5.90  | 4.38E-02 | -8.52  | 9.88  | 3.88E-01 | -0.10   | 15.42  | 9.95E-01 | -13.91 | 9.32  | 1.36E-01 | -33.52 | 18.88 | 7.59E-02 |
| cg10182102 | 32.08  | 15.91 | 4.38E-02 | 24.09  | 44.13 | 5.85E-01 | -286.30 | 259.33 | 2.70E-01 | 38.14  | 18.09 | 3.51E-02 | 5.63   | 52.27 | 9.14E-01 |
| cg02352716 | -7.09  | 3.52  | 4.38E-02 | -6.00  | 4.71  | 2.03E-01 | -14.82  | 8.39   | 7.72E-02 | -0.47  | 11.67 | 9.68E-01 | -6.22  | 8.38  | 4.58E-01 |
| cg14279151 | 17.26  | 8.56  | 4.38E-02 | 5.64   | 18.66 | 7.63E-01 | 33.93   | 20.09  | 9.12E-02 | 9.64   | 10.14 | 3.42E-01 | 51.10  | 25.89 | 4.84E-02 |
| cg05926837 | -14.08 | 6.99  | 4.38E-02 | -31.45 | 13.08 | 1.62E-02 | -4.41   | 16.51  | 7.90E-01 | -7.21  | 12.14 | 5.53E-01 | -9.44  | 15.45 | 5.41E-01 |
| cg13756768 | -6.85  | 3.40  | 4.38E-02 | -1.77  | 8.30  | 8.31E-01 | 5.93    | 11.41  | 6.03E-01 | -8.26  | 4.20  | 4.94E-02 | -18.44 | 11.24 | 1.01E-01 |
| cg26106778 | 8.40   | 4.17  | 4.38E-02 | 10.40  | 6.32  | 1.00E-01 | 9.31    | 9.12   | 3.07E-01 | 8.68   | 11.14 | 4.36E-01 | 3.33   | 8.98  | 7.10E-01 |
| cg20109001 | -12.48 | 6.19  | 4.39E-02 | -23.50 | 10.06 | 1.94E-02 | 0.17    | 13.08  | 9.90E-01 | -6.15  | 14.51 | 6.72E-01 | -11.58 | 13.36 | 3.86E-01 |
| cg13120096 | 28.68  | 14.23 | 4.39E-02 | 36.41  | 18.95 | 5.47E-02 | 55.11   | 45.32  | 2.24E-01 | 28.98  | 42.86 | 4.99E-01 | -2.06  | 29.81 | 9.45E-01 |
| cg01469715 | -8.48  | 4.21  | 4.39E-02 | -12.04 | 9.79  | 2.19E-01 | -16.02  | 17.03  | 3.47E-01 | -6.79  | 5.12  | 1.85E-01 | -8.77  | 14.92 | 5.57E-01 |
| cg23901920 | -9.51  | 4.72  | 4.39E-02 | -16.93 | 11.35 | 1.36E-01 | -9.80   | 20.50  | 6.33E-01 | -6.64  | 5.78  | 2.50E-01 | -15.20 | 14.37 | 2.90E-01 |
| cg15847527 | 13.86  | 6.88  | 4.39E-02 | 9.03   | 9.75  | 3.54E-01 | 28.78   | 15.57  | 6.45E-02 | 1.74   | 20.48 | 9.32E-01 | 18.31  | 15.62 | 2.41E-01 |
| cg03262295 | 20.21  | 10.03 | 4.39E-02 | 44.69  | 22.30 | 4.50E-02 | 21.31   | 30.30  | 4.82E-01 | 8.75   | 7.49  | 2.42E-01 | 47.17  | 28.47 | 9.75E-02 |
| cg26677288 | 7.43   | 3.69  | 4.39E-02 | 2.47   | 8.14  | 7.62E-01 | 8.35    | 13.17  | 5.26E-01 | 7.75   | 4.76  | 1.03E-01 | 14.04  | 10.88 | 1.97E-01 |
| cg20700813 | -16.15 | 8.02  | 4.39E-02 | -19.69 | 13.70 | 1.51E-01 | 2.35    | 15.56  | 8.80E-01 | -18.42 | 18.08 | 3.08E-01 | -32.83 | 18.13 | 7.01E-02 |
| cg16710656 | -9.86  | 4.90  | 4.39E-02 | -7.97  | 7.15  | 2.65E-01 | -15.80  | 10.56  | 1.35E-01 | -0.03  | 12.83 | 9.98E-01 | -15.97 | 11.83 | 1.77E-01 |
| cg06481122 | 18.53  | 9.20  | 4.39E-02 | 31.20  | 15.10 | 3.89E-02 | 7.94    | 24.55  | 7.46E-01 | 12.80  | 25.58 | 6.17E-01 | 11.67  | 15.34 | 4.47E-01 |
| cg20243424 | -10.58 | 5.25  | 4.39E-02 | -13.05 | 9.06  | 1.50E-01 | -20.87  | 13.00  | 1.08E-01 | -1.80  | 9.71  | 8.53E-01 | -10.89 | 11.51 | 3.44E-01 |
| cg04048705 | -6.60  | 3.28  | 4.39E-02 | -6.01  | 5.78  | 2.99E-01 | -5.06   | 8.43   | 5.48E-01 | -3.63  | 6.33  | 5.66E-01 | -11.28 | 6.42  | 7.89E-02 |
| cg27336068 | -3.31  | 1.64  | 4.39E-02 | -2.47  | 2.24  | 2.71E-01 | -0.89   | 3.65   | 8.07E-01 | -4.60  | 7.08  | 5.16E-01 | -7.55  | 3.62  | 3.71E-02 |
| cg17397150 | 14.71  | 7.30  | 4.39E-02 | 25.54  | 12.35 | 3.86E-02 | 15.49   | 17.27  | 3.70E-01 | 3.37   | 13.60 | 8.04E-01 | 11.13  | 17.02 | 5.13E-01 |
| cg26026615 | 15.05  | 7.47  | 4.39E-02 | 20.93  | 9.63  | 2.97E-02 | 12.12   | 15.30  | 4.29E-01 | 38.71  | 18.37 | 3.51E-02 | -0.52  | 10.78 | 9.61E-01 |
| cg13560612 | 12.33  | 6.12  | 4.39E-02 | 3.46   | 8.23  | 6.74E-01 | 7.54    | 8.90   | 3.97E-01 | 31.20  | 21.59 | 1.48E-01 | 27.07  | 11.29 | 1.65E-02 |
| cg00515408 | 14.13  | 7.01  | 4.39E-02 | 15.31  | 7.58  | 4.34E-02 | 30.88   | 13.37  | 2.09E-02 | -25.93 | 26.11 | 3.21E-01 | 9.36   | 10.81 | 3.87E-01 |
| cg11944757 | 28.39  | 14.09 | 4.39E-02 | 32.32  | 18.23 | 7.63E-02 | 67.55   | 43.70  | 1.22E-01 | -8.67  | 41.67 | 8.35E-01 | 16.56  | 32.84 | 6.14E-01 |
| cg22459359 | -41.83 | 20.76 | 4.39E-02 | -44.74 | 26.22 | 8.79E-02 | -41.03  | 82.27  | 6.18E-01 | -63.06 | 62.92 | 3.16E-01 | -21.44 | 46.35 | 6.44E-01 |
| cg03918433 | -12.51 | 6.21  | 4.39E-02 | -16.21 | 10.85 | 1.35E-01 | -6.26   | 12.84  | 6.26E-01 | -20.28 | 12.49 | 1.04E-01 | -3.80  | 14.17 | 7.88E-01 |
| cg03904607 | 20.80  | 10.33 | 4.39E-02 | 33.13  | 22.07 | 1.33E-01 | 14.76   | 98.22  | 8.81E-01 | 10.55  | 12.65 | 4.04E-01 | 61.35  | 32.06 | 5.57E-02 |
| cg01386275 | -9.96  | 4.94  | 4.39E-02 | -6.73  | 7.07  | 3.41E-01 | -7.98   | 14.02  | 5.69E-01 | -18.22 | 13.52 | 1.78E-01 | -12.81 | 9.83  | 1.93E-01 |
| cg19544031 | 46.97  | 23.31 | 4.39E-02 | 48.46  | 30.53 | 1.12E-01 | 90.99   | 73.21  | 2.14E-01 | -9.82  | 58.59 | 8.67E-01 | 70.25  | 58.79 | 2.32E-01 |
| cg10520543 | -9.19  | 4.56  | 4.39E-02 | -11.64 | 7.14  | 1.03E-01 | 6.85    | 10.55  | 5.16E-01 | -14.67 | 9.62  | 1.27E-01 | -13.45 | 10.74 | 2.10E-01 |
| cg10644885 | 14.06  | 6.98  | 4.39E-02 | 34.74  | 17.30 | 4.47E-02 | 27.42   | 19.01  | 1.49E-01 | 6.91   | 9.05  | 4.45E-01 | 5.61   | 21.29 | 7.92E-01 |
| cg04203238 | 19.39  | 9.62  | 4.39E-02 | 36.12  | 33.70 | 2.84E-01 | -91.33  | 97.61  | 3.49E-01 | 17.05  | 10.70 | 1.11E-01 | 35.40  | 30.41 | 2.44E-01 |
| cg01804370 | 16.16  | 8.02  | 4.39E-02 | 9.87   | 21.52 | 6.46E-01 | 30.72   | 34.11  | 3.68E-01 | 15.71  | 9.51  | 9.86E-02 | 20.24  | 26.05 | 4.37E-01 |

|              |        |       |          |        |       |          |         |        |          |        |       |          |        |       |          |
|--------------|--------|-------|----------|--------|-------|----------|---------|--------|----------|--------|-------|----------|--------|-------|----------|
| cg01428408   | 13.48  | 6.69  | 4.39E-02 | -1.97  | 16.56 | 9.05E-01 | 21.90   | 30.22  | 4.69E-01 | 16.45  | 8.02  | 4.02E-02 | 13.91  | 22.08 | 5.29E-01 |
| cg21071075   | -9.56  | 4.75  | 4.39E-02 | -11.44 | 6.79  | 9.20E-02 | 0.22    | 9.79   | 9.82E-01 | -1.77  | 14.26 | 9.01E-01 | -23.14 | 11.67 | 4.73E-02 |
| cg22898334   | 22.14  | 10.99 | 4.39E-02 | 1.17   | 20.74 | 9.55E-01 | 29.76   | 25.03  | 2.34E-01 | 32.00  | 17.93 | 7.43E-02 | 26.92  | 28.33 | 3.42E-01 |
| cg01409887   | 33.17  | 16.46 | 4.39E-02 | 103.75 | 54.30 | 5.60E-02 | -194.38 | 263.10 | 4.60E-01 | 27.30  | 17.74 | 1.24E-01 | 20.59  | 79.74 | 7.96E-01 |
| ch.6.775158F | -24.93 | 12.38 | 4.39E-02 | -11.60 | 18.74 | 5.36E-01 | -19.09  | 27.43  | 4.87E-01 | -50.22 | 36.05 | 1.64E-01 | -41.51 | 25.12 | 9.85E-02 |
| cg23478105   | 28.00  | 13.90 | 4.39E-02 | -8.01  | 45.09 | 8.59E-01 | 111.32  | 204.75 | 5.87E-01 | 35.23  | 15.22 | 2.06E-02 | -16.96 | 53.90 | 7.53E-01 |
| cg13687885   | -9.24  | 4.58  | 4.39E-02 | -12.75 | 11.54 | 2.69E-01 | -13.82  | 21.29  | 5.16E-01 | -6.03  | 5.47  | 2.70E-01 | -25.01 | 14.96 | 9.46E-02 |
| cg00352652   | -24.55 | 12.19 | 4.39E-02 | -57.07 | 28.19 | 4.30E-02 | -13.94  | 77.23  | 8.57E-01 | -29.42 | 16.21 | 6.96E-02 | 4.57   | 22.51 | 8.39E-01 |
| cg21642926   | 9.42   | 4.68  | 4.39E-02 | 9.91   | 7.92  | 2.11E-01 | 2.38    | 12.24  | 8.46E-01 | 9.03   | 7.76  | 2.45E-01 | 16.42  | 12.39 | 1.85E-01 |
| cg27277034   | -19.50 | 9.68  | 4.39E-02 | -38.05 | 18.05 | 3.51E-02 | 5.29    | 62.04  | 9.32E-01 | -17.48 | 12.80 | 1.72E-01 | 11.18  | 28.35 | 6.93E-01 |
| cg25457200   | -6.54  | 3.25  | 4.39E-02 | -8.48  | 4.96  | 8.76E-02 | 11.22   | 10.47  | 2.83E-01 | -7.39  | 4.06  | 6.86E-02 | -12.84 | 10.78 | 2.34E-01 |
| cg03882445   | 31.61  | 15.69 | 4.40E-02 | 37.44  | 24.48 | 1.26E-01 | 87.91   | 34.29  | 1.04E-02 | -4.27  | 31.64 | 8.93E-01 | 20.56  | 18.48 | 2.66E-01 |
| cg08081407   | -7.78  | 3.86  | 4.40E-02 | -5.48  | 5.95  | 3.57E-01 | -5.23   | 13.11  | 6.90E-01 | -18.72 | 15.22 | 2.19E-01 | -8.92  | 5.91  | 1.31E-01 |
| cg09291217   | -11.50 | 5.71  | 4.40E-02 | -14.37 | 14.97 | 3.37E-01 | 0.06    | 32.76  | 9.99E-01 | -12.98 | 6.72  | 5.34E-02 | -0.42  | 17.81 | 9.81E-01 |
| cg14348540   | -7.31  | 3.63  | 4.40E-02 | -6.66  | 5.43  | 2.20E-01 | -5.88   | 8.45   | 4.87E-01 | -15.18 | 9.56  | 1.12E-01 | -4.73  | 7.66  | 5.37E-01 |
| cg17838626   | 26.65  | 13.23 | 4.40E-02 | 29.26  | 17.89 | 1.02E-01 | 35.16   | 40.84  | 3.89E-01 | 22.18  | 36.08 | 5.39E-01 | 18.62  | 28.58 | 5.15E-01 |
| cg15735157   | -6.30  | 3.13  | 4.40E-02 | -1.51  | 5.40  | 7.80E-01 | -6.19   | 8.12   | 4.46E-01 | -12.33 | 4.49  | 6.00E-03 | 0.21   | 7.65  | 9.78E-01 |
| cg26792288   | -11.72 | 5.82  | 4.40E-02 | -12.00 | 13.21 | 3.64E-01 | -12.62  | 21.58  | 5.59E-01 | -13.50 | 7.11  | 5.75E-02 | 8.87   | 23.00 | 7.00E-01 |
| cg16823277   | -9.77  | 4.85  | 4.40E-02 | -15.13 | 9.22  | 1.01E-01 | -16.07  | 10.28  | 1.18E-01 | -6.34  | 8.12  | 4.35E-01 | 1.70   | 12.74 | 8.94E-01 |
| cg06457011   | -7.70  | 3.82  | 4.40E-02 | -5.09  | 4.43  | 2.51E-01 | -18.94  | 7.33   | 9.75E-03 | 5.12   | 21.36 | 8.10E-01 | -3.05  | 8.40  | 7.17E-01 |
| cg24032691   | -9.50  | 4.72  | 4.40E-02 | -10.40 | 7.05  | 1.40E-01 | -4.24   | 10.97  | 6.99E-01 | -6.66  | 12.35 | 5.90E-01 | -13.95 | 10.03 | 1.64E-01 |
| cg10524983   | 38.65  | 19.19 | 4.40E-02 | 21.14  | 17.21 | 2.19E-01 | 92.14   | 42.10  | 2.86E-02 | -37.97 | 67.87 | 5.76E-01 | 58.62  | 30.39 | 5.37E-02 |
| cg10592245   | 10.91  | 5.42  | 4.40E-02 | 30.80  | 19.23 | 1.09E-01 | -9.55   | 85.35  | 9.11E-01 | 8.95   | 6.06  | 1.40E-01 | 11.45  | 15.71 | 4.66E-01 |
| cg15988350   | 16.38  | 8.13  | 4.40E-02 | 40.07  | 26.89 | 1.36E-01 | 42.67   | 35.81  | 2.33E-01 | 16.99  | 9.77  | 8.21E-02 | -7.60  | 20.06 | 7.05E-01 |
| cg16456625   | 16.87  | 8.38  | 4.40E-02 | 34.01  | 14.10 | 1.59E-02 | 1.71    | 30.29  | 9.55E-01 | 8.75   | 12.68 | 4.90E-01 | 6.88   | 22.88 | 7.64E-01 |
| cg24929538   | -9.92  | 4.92  | 4.40E-02 | -12.20 | 9.74  | 2.11E-01 | 1.95    | 14.95  | 8.96E-01 | -11.82 | 6.97  | 9.00E-02 | -8.13  | 13.27 | 5.40E-01 |
| cg07196383   | 18.92  | 9.39  | 4.40E-02 | 35.18  | 13.87 | 1.12E-02 | 3.10    | 16.87  | 8.54E-01 | 0.58   | 19.75 | 9.77E-01 | 31.41  | 23.11 | 1.74E-01 |
| cg22264813   | 18.83  | 9.35  | 4.40E-02 | 20.76  | 16.10 | 1.97E-01 | 1.02    | 19.39  | 9.58E-01 | 24.66  | 20.15 | 2.21E-01 | 29.23  | 20.17 | 1.47E-01 |
| cg24941047   | 7.65   | 3.80  | 4.40E-02 | -0.63  | 7.21  | 9.31E-01 | 19.07   | 9.99   | 5.63E-02 | 9.09   | 5.32  | 8.74E-02 | 6.31   | 14.45 | 6.62E-01 |
| cg12175753   | 27.98  | 13.89 | 4.40E-02 | 27.30  | 17.88 | 1.27E-01 | 37.34   | 38.15  | 3.28E-01 | 43.55  | 66.54 | 5.13E-01 | 21.15  | 29.62 | 4.75E-01 |
| cg04148163   | -9.32  | 4.63  | 4.40E-02 | -16.53 | 8.09  | 4.09E-02 | -7.20   | 12.95  | 5.78E-01 | -1.46  | 6.19  | 8.14E-01 | -20.40 | 11.41 | 7.38E-02 |
| cg16443424   | 22.44  | 11.14 | 4.40E-02 | 52.26  | 37.75 | 1.66E-01 | 146.17  | 129.13 | 2.58E-01 | 17.99  | 12.22 | 1.41E-01 | 24.90  | 40.96 | 5.43E-01 |
| cg19247310   | -14.16 | 7.03  | 4.40E-02 | -16.26 | 15.82 | 3.04E-01 | 15.67   | 35.10  | 6.55E-01 | -11.80 | 8.70  | 1.75E-01 | -35.32 | 21.23 | 9.63E-02 |
| cg01668008   | -12.79 | 6.35  | 4.40E-02 | -12.24 | 9.21  | 1.84E-01 | -25.34  | 16.91  | 1.34E-01 | 0.54   | 12.78 | 9.66E-01 | -25.86 | 17.19 | 1.32E-01 |
| cg21917524   | 14.77  | 7.34  | 4.40E-02 | 9.27   | 11.32 | 4.13E-01 | 62.90   | 27.86  | 2.40E-02 | 8.41   | 7.09  | 2.36E-01 | 23.33  | 15.61 | 1.35E-01 |

|            |        |       |          |        |       |          |        |        |          |        |        |          |        |       |          |
|------------|--------|-------|----------|--------|-------|----------|--------|--------|----------|--------|--------|----------|--------|-------|----------|
| cg02229097 | 18.98  | 9.42  | 4.40E-02 | 32.64  | 29.98 | 2.76E-01 | -29.85 | 73.17  | 6.83E-01 | 19.58  | 10.41  | 6.00E-02 | 3.15   | 36.85 | 9.32E-01 |
| cg12318501 | -8.98  | 4.46  | 4.40E-02 | -5.42  | 7.45  | 4.67E-01 | -12.98 | 11.65  | 2.65E-01 | -7.09  | 8.99   | 4.31E-01 | -13.60 | 8.92  | 1.27E-01 |
| cg00534343 | 30.45  | 15.12 | 4.40E-02 | 7.90   | 17.95 | 6.60E-01 | 66.95  | 25.27  | 8.06E-03 | 0.25   | 42.23  | 9.95E-01 | 41.03  | 24.06 | 8.81E-02 |
| cg04276007 | -16.66 | 8.27  | 4.40E-02 | -30.58 | 17.30 | 7.70E-02 | -44.59 | 21.01  | 3.38E-02 | -8.63  | 7.46   | 2.47E-01 | -2.21  | 21.00 | 9.16E-01 |
| cg03995631 | -9.38  | 4.66  | 4.40E-02 | -9.42  | 6.21  | 1.29E-01 | -12.10 | 11.15  | 2.78E-01 | -35.14 | 18.89  | 6.29E-02 | 0.80   | 10.33 | 9.38E-01 |
| cg06655062 | 21.67  | 10.76 | 4.40E-02 | 50.20  | 15.23 | 9.79E-04 | 9.13   | 12.42  | 4.62E-01 | 3.03   | 13.87  | 8.27E-01 | 29.57  | 17.68 | 9.45E-02 |
| cg05913229 | 51.24  | 25.45 | 4.40E-02 | 77.13  | 31.93 | 1.57E-02 | 17.31  | 137.07 | 9.00E-01 | 71.55  | 88.42  | 4.18E-01 | -17.26 | 51.14 | 7.36E-01 |
| cg22459924 | -5.77  | 2.86  | 4.40E-02 | -3.37  | 3.60  | 3.50E-01 | -13.54 | 7.02   | 5.37E-02 | -7.95  | 8.85   | 3.69E-01 | -5.73  | 9.22  | 5.35E-01 |
| cg08048699 | 32.34  | 16.06 | 4.40E-02 | 70.97  | 19.54 | 2.81E-04 | 38.25  | 21.92  | 8.09E-02 | 5.28   | 11.25  | 6.39E-01 | 22.42  | 24.31 | 3.56E-01 |
| cg07906726 | -10.05 | 4.99  | 4.40E-02 | -9.77  | 6.89  | 1.56E-01 | -14.75 | 11.81  | 2.12E-01 | 0.83   | 15.52  | 9.57E-01 | -12.27 | 11.34 | 2.79E-01 |
| cg04945434 | -22.43 | 11.14 | 4.40E-02 | -45.92 | 15.08 | 2.32E-03 | -31.09 | 24.16  | 1.98E-01 | -5.46  | 7.87   | 4.88E-01 | -19.14 | 20.81 | 3.58E-01 |
| cg10284755 | -10.48 | 5.21  | 4.41E-02 | -13.90 | 8.47  | 1.01E-01 | 0.57   | 11.47  | 9.60E-01 | -8.67  | 11.25  | 4.41E-01 | -17.29 | 11.58 | 1.35E-01 |
| cg15602217 | -13.98 | 6.94  | 4.41E-02 | -4.60  | 12.49 | 7.12E-01 | -31.12 | 15.34  | 4.24E-02 | -15.73 | 14.14  | 2.66E-01 | -9.75  | 14.04 | 4.87E-01 |
| cg02756106 | 23.59  | 11.71 | 4.41E-02 | 31.84  | 15.49 | 3.99E-02 | -13.19 | 36.34  | 7.17E-01 | 46.38  | 34.82  | 1.83E-01 | 7.14   | 25.48 | 7.79E-01 |
| cg21055532 | 17.72  | 8.80  | 4.41E-02 | 46.64  | 25.33 | 6.56E-02 | 11.19  | 126.07 | 9.29E-01 | 13.66  | 9.80   | 1.63E-01 | 15.00  | 33.72 | 6.56E-01 |
| cg05413628 | 4.86   | 2.41  | 4.41E-02 | 3.70   | 3.62  | 3.08E-01 | 8.78   | 4.55   | 5.38E-02 | 4.97   | 7.09   | 4.83E-01 | 1.11   | 6.02  | 8.53E-01 |
| cg08463932 | 15.76  | 7.83  | 4.41E-02 | 23.01  | 11.78 | 5.09E-02 | 7.00   | 14.90  | 6.39E-01 | -1.81  | 19.70  | 9.27E-01 | 31.59  | 22.09 | 1.53E-01 |
| cg09138445 | 41.62  | 20.67 | 4.41E-02 | -10.31 | 55.90 | 8.54E-01 | 303.48 | 260.13 | 2.43E-01 | 47.96  | 24.24  | 4.79E-02 | 48.04  | 57.36 | 4.02E-01 |
| cg16190018 | -24.35 | 12.09 | 4.41E-02 | -30.23 | 17.97 | 9.24E-02 | -38.44 | 66.62  | 5.64E-01 | -25.04 | 19.52  | 1.99E-01 | 1.77   | 33.53 | 9.58E-01 |
| cg04158018 | 11.36  | 5.64  | 4.41E-02 | 5.48   | 6.72  | 4.15E-01 | 28.07  | 10.47  | 7.34E-03 | 13.95  | 17.93  | 4.36E-01 | 4.56   | 10.78 | 6.72E-01 |
| cg03998264 | 4.70   | 2.33  | 4.41E-02 | 3.64   | 2.88  | 2.05E-01 | 11.07  | 5.61   | 4.85E-02 | 11.46  | 9.74   | 2.39E-01 | -2.47  | 7.02  | 7.25E-01 |
| cg06245338 | 10.16  | 5.05  | 4.41E-02 | 11.26  | 6.59  | 8.77E-02 | 19.66  | 13.18  | 1.36E-01 | 10.37  | 13.16  | 4.31E-01 | -7.09  | 14.58 | 6.27E-01 |
| cg18051346 | 21.16  | 10.51 | 4.41E-02 | 4.22   | 20.50 | 8.37E-01 | -18.02 | 64.43  | 7.80E-01 | 29.26  | 14.04  | 3.72E-02 | 27.58  | 27.14 | 3.10E-01 |
| cg07244098 | 5.04   | 2.50  | 4.41E-02 | 5.20   | 3.76  | 1.66E-01 | 9.41   | 4.90   | 5.48E-02 | -4.26  | 7.82   | 5.86E-01 | 3.69   | 5.68  | 5.16E-01 |
| cg16401465 | -8.34  | 4.14  | 4.41E-02 | -11.28 | 5.94  | 5.75E-02 | -10.00 | 8.72   | 2.52E-01 | -6.14  | 14.35  | 6.69E-01 | -0.42  | 9.15  | 9.63E-01 |
| cg22357984 | -13.49 | 6.70  | 4.41E-02 | -11.95 | 10.87 | 2.72E-01 | -0.82  | 18.57  | 9.65E-01 | -13.08 | 10.72  | 2.22E-01 | -37.73 | 21.32 | 7.67E-02 |
| cg10698098 | 26.79  | 13.31 | 4.41E-02 | 47.26  | 31.55 | 1.34E-01 | 24.77  | 163.46 | 8.80E-01 | 17.38  | 15.70  | 2.68E-01 | 59.23  | 42.80 | 1.66E-01 |
| cg05419581 | -16.37 | 8.13  | 4.41E-02 | -5.23  | 10.93 | 6.32E-01 | -15.80 | 24.86  | 5.25E-01 | -25.97 | 29.93  | 3.86E-01 | -37.11 | 15.77 | 1.86E-02 |
| cg06620723 | 7.55   | 3.75  | 4.41E-02 | 8.72   | 5.12  | 8.86E-02 | 12.74  | 9.26   | 1.69E-01 | -0.02  | 11.74  | 9.99E-01 | 3.96   | 8.44  | 6.39E-01 |
| cg26162326 | 4.75   | 2.36  | 4.41E-02 | 2.05   | 3.25  | 5.29E-01 | 8.03   | 5.22   | 1.24E-01 | 11.13  | 5.70   | 5.10E-02 | 1.28   | 7.59  | 8.66E-01 |
| cg05209525 | 49.39  | 24.54 | 4.41E-02 | 65.53  | 37.29 | 7.88E-02 | 189.80 | 120.00 | 1.14E-01 | 42.47  | 102.23 | 6.78E-01 | 22.74  | 35.89 | 5.26E-01 |
| cg12207585 | 8.08   | 4.01  | 4.41E-02 | 12.24  | 6.72  | 6.84E-02 | 6.46   | 8.32   | 4.38E-01 | 4.25   | 8.34   | 6.10E-01 | 6.83   | 9.49  | 4.72E-01 |
| cg11607648 | -11.85 | 5.89  | 4.41E-02 | -26.59 | 11.00 | 1.57E-02 | -8.95  | 21.86  | 6.82E-01 | -3.97  | 6.73   | 5.56E-01 | -18.95 | 16.19 | 2.42E-01 |
| cg08812242 | 32.02  | 15.91 | 4.41E-02 | 27.94  | 43.29 | 5.19E-01 | -25.06 | 211.46 | 9.06E-01 | 38.55  | 17.86  | 3.09E-02 | -33.51 | 62.06 | 5.89E-01 |
| cg18862767 | 12.30  | 6.11  | 4.41E-02 | 14.43  | 8.80  | 1.01E-01 | 10.42  | 21.70  | 6.31E-01 | 12.45  | 23.64  | 5.98E-01 | 9.91   | 10.02 | 3.23E-01 |

|            |        |       |          |        |       |          |        |        |          |        |       |          |        |       |          |
|------------|--------|-------|----------|--------|-------|----------|--------|--------|----------|--------|-------|----------|--------|-------|----------|
| cg20611882 | 11.86  | 5.89  | 4.41E-02 | 25.74  | 11.52 | 2.54E-02 | -6.48  | 15.25  | 6.71E-01 | 13.84  | 9.67  | 1.52E-01 | 6.43   | 11.03 | 5.60E-01 |
| cg05673892 | 17.77  | 8.83  | 4.41E-02 | 25.21  | 15.06 | 9.41E-02 | 28.32  | 19.18  | 1.40E-01 | 1.30   | 15.65 | 9.34E-01 | 21.32  | 24.86 | 3.91E-01 |
| cg17701417 | -32.60 | 16.20 | 4.41E-02 | -39.05 | 21.41 | 6.82E-02 | -55.85 | 44.30  | 2.07E-01 | -26.80 | 57.55 | 6.41E-01 | -3.09  | 34.95 | 9.30E-01 |
| cg21805936 | -7.47  | 3.71  | 4.42E-02 | -12.32 | 5.53  | 2.58E-02 | -2.06  | 7.60   | 7.87E-01 | -13.50 | 12.61 | 2.84E-01 | -1.14  | 7.84  | 8.85E-01 |
| cg11662098 | 29.10  | 14.46 | 4.42E-02 | 27.68  | 23.08 | 2.30E-01 | 11.87  | 25.86  | 6.46E-01 | 11.19  | 42.80 | 7.94E-01 | 73.23  | 33.99 | 3.12E-02 |
| cg05628400 | -17.06 | 8.48  | 4.42E-02 | -0.56  | 16.12 | 9.73E-01 | 4.26   | 29.33  | 8.84E-01 | -28.37 | 8.29  | 6.22E-04 | -4.05  | 26.46 | 8.78E-01 |
| cg22598247 | -7.78  | 3.86  | 4.42E-02 | 1.54   | 9.93  | 8.76E-01 | 5.10   | 16.19  | 7.53E-01 | -10.25 | 4.67  | 2.84E-02 | -12.01 | 11.75 | 3.07E-01 |
| cg24427243 | -7.06  | 3.51  | 4.42E-02 | -6.31  | 6.40  | 3.24E-01 | -12.52 | 11.89  | 2.92E-01 | -6.61  | 5.23  | 2.06E-01 | -6.74  | 8.66  | 4.37E-01 |
| cg18402034 | 18.52  | 9.20  | 4.42E-02 | 20.80  | 13.23 | 1.16E-01 | 37.55  | 18.72  | 4.49E-02 | -17.90 | 27.84 | 5.20E-01 | 8.06   | 22.63 | 7.22E-01 |
| cg05149425 | 29.95  | 14.88 | 4.42E-02 | 42.69  | 46.70 | 3.61E-01 | -21.61 | 190.07 | 9.09E-01 | 29.78  | 16.59 | 7.26E-02 | 20.35  | 50.35 | 6.86E-01 |
| cg09233013 | 18.09  | 8.99  | 4.42E-02 | 18.83  | 28.18 | 5.04E-01 | 90.13  | 112.30 | 4.22E-01 | 18.05  | 9.96  | 7.00E-02 | 11.61  | 32.26 | 7.19E-01 |
| cg04369350 | 10.91  | 5.42  | 4.42E-02 | 2.80   | 14.00 | 8.41E-01 | 26.90  | 18.41  | 1.44E-01 | 8.90   | 6.47  | 1.69E-01 | 31.17  | 21.89 | 1.55E-01 |
| cg06732873 | -5.77  | 2.87  | 4.42E-02 | -7.35  | 4.45  | 9.84E-02 | -7.62  | 7.35   | 3.00E-01 | -3.95  | 5.29  | 4.55E-01 | -2.85  | 7.69  | 7.10E-01 |
| cg14795750 | 16.43  | 8.16  | 4.42E-02 | 7.65   | 10.36 | 4.60E-01 | 28.60  | 27.56  | 2.99E-01 | 47.55  | 18.25 | 9.19E-03 | 9.34   | 9.22  | 3.11E-01 |
| cg27660099 | -32.26 | 16.03 | 4.42E-02 | -48.55 | 18.20 | 7.65E-03 | 6.90   | 32.37  | 8.31E-01 | -12.96 | 7.07  | 6.70E-02 | -73.56 | 23.70 | 1.91E-03 |
| cg15496763 | -10.19 | 5.07  | 4.42E-02 | -18.71 | 11.43 | 1.02E-01 | 1.44   | 28.58  | 9.60E-01 | -9.77  | 6.24  | 1.17E-01 | -1.04  | 15.12 | 9.45E-01 |
| cg03570976 | 45.36  | 22.54 | 4.42E-02 | 46.73  | 27.41 | 8.82E-02 | 134.77 | 106.43 | 2.05E-01 | 55.22  | 85.47 | 5.18E-01 | 18.49  | 49.29 | 7.08E-01 |
| cg08466269 | 18.06  | 8.97  | 4.42E-02 | 24.92  | 13.24 | 5.98E-02 | 32.34  | 20.61  | 1.17E-01 | -5.29  | 22.83 | 8.17E-01 | 6.58   | 20.25 | 7.45E-01 |
| cg00043800 | 13.49  | 6.71  | 4.42E-02 | 14.13  | 10.18 | 1.65E-01 | 20.18  | 13.76  | 1.42E-01 | 2.24   | 16.93 | 8.95E-01 | 12.92  | 16.18 | 4.25E-01 |
| cg03465947 | 36.12  | 17.95 | 4.42E-02 | 33.97  | 22.80 | 1.36E-01 | 80.45  | 66.60  | 2.27E-01 | 23.31  | 53.84 | 6.65E-01 | 33.75  | 40.51 | 4.05E-01 |
| cg05135156 | 10.69  | 5.31  | 4.42E-02 | 10.43  | 7.67  | 1.73E-01 | 25.43  | 12.24  | 3.77E-02 | 14.70  | 13.76 | 2.85E-01 | -3.01  | 10.85 | 7.81E-01 |
| cg19242268 | 10.74  | 5.34  | 4.42E-02 | 15.34  | 7.50  | 4.07E-02 | 15.27  | 12.04  | 2.05E-01 | -7.64  | 16.67 | 6.47E-01 | 3.83   | 12.12 | 7.52E-01 |
| cg23850899 | 15.65  | 7.78  | 4.42E-02 | 23.23  | 16.10 | 1.49E-01 | 4.32   | 21.01  | 8.37E-01 | 15.50  | 13.73 | 2.59E-01 | 15.11  | 14.00 | 2.81E-01 |
| cg12193289 | -5.24  | 2.61  | 4.42E-02 | -3.53  | 4.07  | 3.86E-01 | -4.99  | 6.21   | 4.22E-01 | -9.97  | 5.91  | 9.12E-02 | -4.44  | 5.56  | 4.24E-01 |
| cg04247152 | 4.54   | 2.25  | 4.42E-02 | 0.74   | 3.22  | 8.18E-01 | 8.36   | 3.54   | 1.82E-02 | 6.44   | 11.85 | 5.87E-01 | 8.01   | 8.63  | 3.54E-01 |
| cg26514623 | 5.04   | 2.51  | 4.42E-02 | 3.78   | 3.34  | 2.58E-01 | 11.27  | 6.78   | 9.63E-02 | 6.12   | 6.00  | 3.08E-01 | 2.45   | 7.04  | 7.28E-01 |
| cg13494509 | 24.08  | 11.97 | 4.42E-02 | 52.12  | 33.57 | 1.21E-01 | 62.85  | 96.02  | 5.13E-01 | 22.28  | 13.93 | 1.10E-01 | 0.39   | 34.58 | 9.91E-01 |
| cg25354814 | 15.71  | 7.81  | 4.42E-02 | 1.66   | 15.86 | 9.17E-01 | 4.13   | 27.20  | 8.79E-01 | 18.13  | 10.22 | 7.61E-02 | 47.90  | 25.81 | 6.35E-02 |
| cg17951388 | -36.52 | 18.15 | 4.42E-02 | -35.60 | 26.54 | 1.80E-01 | 1.88   | 71.90  | 9.79E-01 | -78.07 | 46.01 | 8.98E-02 | -25.06 | 32.44 | 4.40E-01 |
| cg03511735 | -22.15 | 11.01 | 4.42E-02 | -34.35 | 14.19 | 1.55E-02 | 18.27  | 50.35  | 7.17E-01 | 6.42   | 57.44 | 9.11E-01 | -8.23  | 19.65 | 6.75E-01 |
| cg25753693 | -11.02 | 5.48  | 4.42E-02 | -8.15  | 6.65  | 2.20E-01 | -18.43 | 10.36  | 7.51E-02 | 15.52  | 16.94 | 3.60E-01 | -18.83 | 9.22  | 4.11E-02 |
| cg25351763 | -7.86  | 3.91  | 4.42E-02 | -12.35 | 8.90  | 1.65E-01 | -14.05 | 16.27  | 3.88E-01 | -3.44  | 4.93  | 4.85E-01 | -20.52 | 11.16 | 6.61E-02 |
| cg24387367 | 7.03   | 3.50  | 4.42E-02 | 4.50   | 6.74  | 5.04E-01 | 21.37  | 12.95  | 9.89E-02 | 7.32   | 6.04  | 2.25E-01 | 5.61   | 6.15  | 3.62E-01 |
| cg15351688 | -16.26 | 8.08  | 4.42E-02 | -21.32 | 10.65 | 4.54E-02 | -20.10 | 25.85  | 4.37E-01 | -19.58 | 26.84 | 4.66E-01 | -1.06  | 16.64 | 9.49E-01 |
| cg25008147 | -6.13  | 3.05  | 4.42E-02 | -10.10 | 5.63  | 7.27E-02 | -2.95  | 6.83   | 6.66E-01 | -3.66  | 5.17  | 4.78E-01 | -8.23  | 7.66  | 2.83E-01 |



|            |        |       |          |        |       |          |         |        |          |        |       |          |        |       |          |
|------------|--------|-------|----------|--------|-------|----------|---------|--------|----------|--------|-------|----------|--------|-------|----------|
| cg14342714 | -32.56 | 16.18 | 4.42E-02 | -26.39 | 18.03 | 1.43E-01 | -73.57  | 24.90  | 3.14E-03 | -44.43 | 45.88 | 3.33E-01 | 0.11   | 22.21 | 9.96E-01 |
| cg06401449 | 29.69  | 14.76 | 4.42E-02 | 30.06  | 17.55 | 8.66E-02 | -12.27  | 49.01  | 8.02E-01 | -3.13  | 53.56 | 9.53E-01 | 77.63  | 41.60 | 6.20E-02 |
| cg02865033 | 22.88  | 11.37 | 4.42E-02 | -6.45  | 20.34 | 7.51E-01 | 42.25   | 24.71  | 8.74E-02 | 23.30  | 15.04 | 1.21E-01 | 49.83  | 28.75 | 8.31E-02 |
| cg02441090 | -11.71 | 5.82  | 4.42E-02 | -9.14  | 9.11  | 3.16E-01 | -11.56  | 12.09  | 3.39E-01 | 3.75   | 16.31 | 8.18E-01 | -24.90 | 12.09 | 3.95E-02 |
| cg11840618 | 18.26  | 9.08  | 4.42E-02 | 30.36  | 23.59 | 1.98E-01 | -6.72   | 51.85  | 8.97E-01 | 15.34  | 10.60 | 1.48E-01 | 30.72  | 30.45 | 3.13E-01 |
| cg00064235 | 15.32  | 7.61  | 4.43E-02 | 23.50  | 14.09 | 9.52E-02 | 19.25   | 21.81  | 3.77E-01 | 5.80   | 14.18 | 6.83E-01 | 14.89  | 13.96 | 2.86E-01 |
| cg04902265 | -50.28 | 24.99 | 4.43E-02 | -83.29 | 34.27 | 1.51E-02 | 60.34   | 80.53  | 4.54E-01 | -56.64 | 47.55 | 2.34E-01 | -15.69 | 56.04 | 7.79E-01 |
| cg08728761 | 38.67  | 19.22 | 4.43E-02 | 44.24  | 24.24 | 6.80E-02 | -74.94  | 74.17  | 3.12E-01 | 38.86  | 84.41 | 6.45E-01 | 54.99  | 38.28 | 1.51E-01 |
| cg12944572 | -9.57  | 4.76  | 4.43E-02 | -16.38 | 14.52 | 2.59E-01 | -6.14   | 31.92  | 8.48E-01 | -8.24  | 5.32  | 1.21E-01 | -15.37 | 17.95 | 3.92E-01 |
| cg20943251 | -5.20  | 2.59  | 4.43E-02 | -5.84  | 4.26  | 1.71E-01 | -0.35   | 5.30   | 9.48E-01 | -8.96  | 5.27  | 8.94E-02 | -5.33  | 6.63  | 4.21E-01 |
| cg09174674 | 22.71  | 11.29 | 4.43E-02 | 30.79  | 21.05 | 1.43E-01 | 13.89   | 34.07  | 6.84E-01 | 23.28  | 16.67 | 1.63E-01 | 11.46  | 29.77 | 7.00E-01 |
| cg11705311 | 7.29   | 3.62  | 4.43E-02 | 6.71   | 6.29  | 2.86E-01 | 14.94   | 9.06   | 9.94E-02 | 4.66   | 5.43  | 3.91E-01 | 9.48   | 14.41 | 5.11E-01 |
| cg07819944 | 15.49  | 7.70  | 4.43E-02 | 28.24  | 14.30 | 4.83E-02 | -5.52   | 22.91  | 8.10E-01 | 21.51  | 15.30 | 1.60E-01 | 7.22   | 13.13 | 5.82E-01 |
| cg05375699 | 15.11  | 7.51  | 4.43E-02 | 21.90  | 14.78 | 1.39E-01 | 20.37   | 15.59  | 1.92E-01 | 30.81  | 17.83 | 8.40E-02 | -2.23  | 13.04 | 8.64E-01 |
| cg12512771 | 9.11   | 4.53  | 4.43E-02 | 11.25  | 5.92  | 5.76E-02 | 13.00   | 11.68  | 2.66E-01 | -2.54  | 17.27 | 8.83E-01 | 3.85   | 10.23 | 7.06E-01 |
| cg00686823 | 5.49   | 2.73  | 4.43E-02 | 4.66   | 3.58  | 1.93E-01 | 13.85   | 7.03   | 4.88E-02 | 3.57   | 9.18  | 6.97E-01 | 2.09   | 6.43  | 7.45E-01 |
| cg23781495 | 13.41  | 6.67  | 4.43E-02 | 15.36  | 10.36 | 1.38E-01 | 21.75   | 17.31  | 2.09E-01 | 7.51   | 16.83 | 6.55E-01 | 9.43   | 12.57 | 4.53E-01 |
| cg16138602 | 12.86  | 6.39  | 4.43E-02 | 15.69  | 9.99  | 1.16E-01 | 9.49    | 13.69  | 4.88E-01 | 2.53   | 17.44 | 8.85E-01 | 16.93  | 13.12 | 1.97E-01 |
| cg03198678 | 16.92  | 8.41  | 4.43E-02 | 24.90  | 15.73 | 1.14E-01 | 35.03   | 32.35  | 2.79E-01 | 17.26  | 11.95 | 1.49E-01 | -7.32  | 21.59 | 7.35E-01 |
| cg03995533 | -9.94  | 4.94  | 4.43E-02 | -3.81  | 8.38  | 6.49E-01 | -15.67  | 13.12  | 2.32E-01 | -10.40 | 8.45  | 2.19E-01 | -16.76 | 12.01 | 1.63E-01 |
| cg04796498 | 18.73  | 9.31  | 4.43E-02 | 29.07  | 19.84 | 1.43E-01 | 23.66   | 18.37  | 1.98E-01 | 5.93   | 14.63 | 6.85E-01 | 32.77  | 27.20 | 2.28E-01 |
| cg00936141 | 34.61  | 17.21 | 4.43E-02 | 32.62  | 50.90 | 5.22E-01 | -114.74 | 242.39 | 6.36E-01 | 36.70  | 19.12 | 5.49E-02 | 24.42  | 64.81 | 7.06E-01 |
| cg03896940 | -11.89 | 5.91  | 4.43E-02 | -15.35 | 9.43  | 1.03E-01 | -5.77   | 13.77  | 6.75E-01 | -20.56 | 15.43 | 1.83E-01 | -6.42  | 11.25 | 5.68E-01 |
| cg23091984 | 29.37  | 14.60 | 4.43E-02 | 54.08  | 58.78 | 3.58E-01 | -192.79 | 187.17 | 3.03E-01 | 34.54  | 14.96 | 2.10E-02 | -31.64 | 52.98 | 5.50E-01 |
| cg22680075 | 16.59  | 8.25  | 4.43E-02 | 34.20  | 20.67 | 9.81E-02 | 28.74   | 37.09  | 4.38E-01 | 10.19  | 9.68  | 2.93E-01 | 35.52  | 32.21 | 2.70E-01 |
| cg16543094 | 13.92  | 6.92  | 4.43E-02 | 12.23  | 20.79 | 5.56E-01 | -5.84   | 35.48  | 8.69E-01 | 17.19  | 8.06  | 3.30E-02 | 1.00   | 20.54 | 9.61E-01 |
| cg08066214 | 17.61  | 8.76  | 4.43E-02 | 36.96  | 15.65 | 1.82E-02 | 14.10   | 15.95  | 3.77E-01 | 11.27  | 17.32 | 5.15E-01 | -8.45  | 24.33 | 7.28E-01 |
| cg21415643 | -42.08 | 20.92 | 4.43E-02 | -12.60 | 56.24 | 8.23E-01 | -280.11 | 298.66 | 3.48E-01 | -48.02 | 24.38 | 4.88E-02 | -29.87 | 60.46 | 6.21E-01 |
| cg22158854 | 10.65  | 5.30  | 4.43E-02 | 23.53  | 11.32 | 3.77E-02 | 13.21   | 23.15  | 5.68E-01 | 6.78   | 6.63  | 3.07E-01 | 5.38   | 17.49 | 7.58E-01 |
| cg25713821 | 56.74  | 28.22 | 4.43E-02 | 81.22  | 64.40 | 2.07E-01 | -150.45 | 329.05 | 6.48E-01 | 58.04  | 33.79 | 8.58E-02 | 17.29  | 87.75 | 8.44E-01 |
| cg24559796 | 8.61   | 4.28  | 4.43E-02 | 11.23  | 6.15  | 6.77E-02 | 10.66   | 10.04  | 2.88E-01 | 10.79  | 10.07 | 2.84E-01 | -4.79  | 10.99 | 6.63E-01 |
| cg03842737 | 19.27  | 9.58  | 4.43E-02 | 20.11  | 18.82 | 2.85E-01 | 6.30    | 18.64  | 7.35E-01 | 12.12  | 19.02 | 5.24E-01 | 41.83  | 20.30 | 3.94E-02 |
| cg27427054 | -18.61 | 9.25  | 4.43E-02 | -14.85 | 17.25 | 3.89E-01 | 0.77    | 17.33  | 9.65E-01 | -29.19 | 18.60 | 1.17E-01 | -40.74 | 21.81 | 6.18E-02 |
| cg02006082 | -8.31  | 4.13  | 4.43E-02 | -15.04 | 6.03  | 1.27E-02 | -16.87  | 10.56  | 1.10E-01 | -2.21  | 5.64  | 6.94E-01 | -0.09  | 10.32 | 9.93E-01 |
| cg25073793 | 16.25  | 8.08  | 4.43E-02 | 25.98  | 11.19 | 2.02E-02 | -2.93   | 17.59  | 8.68E-01 | 7.23   | 21.08 | 7.32E-01 | 18.74  | 23.28 | 4.21E-01 |

|            |        |       |          |        |       |          |        |        |          |        |       |          |        |       |          |
|------------|--------|-------|----------|--------|-------|----------|--------|--------|----------|--------|-------|----------|--------|-------|----------|
| cg03926751 | 5.65   | 2.81  | 4.43E-02 | 3.95   | 3.84  | 3.03E-01 | 8.56   | 6.85   | 2.11E-01 | 13.00  | 7.74  | 9.30E-02 | 2.31   | 6.96  | 7.40E-01 |
| cg08834602 | -13.05 | 6.49  | 4.43E-02 | -12.66 | 10.86 | 2.44E-01 | -17.75 | 13.19  | 1.78E-01 | -19.03 | 17.14 | 2.67E-01 | -5.84  | 12.78 | 6.48E-01 |
| cg01384290 | -7.37  | 3.66  | 4.43E-02 | -16.61 | 8.89  | 6.17E-02 | -15.05 | 15.98  | 3.46E-01 | -5.92  | 4.49  | 1.87E-01 | 1.72   | 10.99 | 8.76E-01 |
| cg08008065 | -6.61  | 3.29  | 4.43E-02 | -12.31 | 6.02  | 4.10E-02 | -1.50  | 11.00  | 8.92E-01 | -2.51  | 4.58  | 5.84E-01 | -15.48 | 10.49 | 1.40E-01 |
| cg00821731 | 9.87   | 4.91  | 4.43E-02 | 15.46  | 7.73  | 4.53E-02 | 12.01  | 12.58  | 3.40E-01 | 4.71   | 12.44 | 7.05E-01 | 3.69   | 9.15  | 6.86E-01 |
| cg13260278 | 7.73   | 3.84  | 4.43E-02 | 12.56  | 5.36  | 1.91E-02 | -2.05  | 9.59   | 8.31E-01 | 1.20   | 10.90 | 9.12E-01 | 7.23   | 8.59  | 4.00E-01 |
| cg17616677 | -5.63  | 2.80  | 4.43E-02 | -10.26 | 4.14  | 1.31E-02 | 3.66   | 6.09   | 5.47E-01 | -7.50  | 4.47  | 9.37E-02 | -3.74  | 5.55  | 5.00E-01 |
| cg08804207 | 9.76   | 4.85  | 4.43E-02 | 12.51  | 6.82  | 6.66E-02 | 14.50  | 10.72  | 1.76E-01 | 5.92   | 19.23 | 7.58E-01 | 0.33   | 10.23 | 9.74E-01 |
| cg25503559 | 26.47  | 13.16 | 4.43E-02 | 28.53  | 14.64 | 5.14E-02 | -6.44  | 85.44  | 9.40E-01 | 27.45  | 57.63 | 6.34E-01 | 18.42  | 38.69 | 6.34E-01 |
| cg16231678 | -35.33 | 17.57 | 4.43E-02 | -56.99 | 23.04 | 1.34E-02 | 5.43   | 66.49  | 9.35E-01 | 2.58   | 53.39 | 9.61E-01 | -11.85 | 35.84 | 7.41E-01 |
| cg07489624 | -23.44 | 11.66 | 4.43E-02 | -23.90 | 13.92 | 8.59E-02 | -20.53 | 38.68  | 5.96E-01 | 39.78  | 62.91 | 5.27E-01 | -35.63 | 28.01 | 2.03E-01 |
| cg16526673 | -10.66 | 5.30  | 4.43E-02 | -27.30 | 10.85 | 1.19E-02 | -1.62  | 15.14  | 9.15E-01 | -5.63  | 7.02  | 4.23E-01 | -9.56  | 12.26 | 4.35E-01 |
| cg15080351 | -7.48  | 3.72  | 4.43E-02 | -14.53 | 6.68  | 2.96E-02 | -10.47 | 9.71   | 2.81E-01 | -7.68  | 4.32  | 7.54E-02 | 6.13   | 8.57  | 4.74E-01 |
| cg08973950 | 6.02   | 3.00  | 4.44E-02 | 4.64   | 4.12  | 2.59E-01 | 13.75  | 6.09   | 2.39E-02 | 0.54   | 10.97 | 9.61E-01 | 1.25   | 7.65  | 8.70E-01 |
| cg09858604 | 19.71  | 9.80  | 4.44E-02 | 35.14  | 15.01 | 1.92E-02 | 7.96   | 34.99  | 8.20E-01 | 20.83  | 21.01 | 3.21E-01 | -1.59  | 18.61 | 9.32E-01 |
| cg12068833 | -4.57  | 2.27  | 4.44E-02 | -5.46  | 3.46  | 1.14E-01 | -2.67  | 4.54   | 5.56E-01 | 1.69   | 6.13  | 7.82E-01 | -9.85  | 5.36  | 6.57E-02 |
| cg22949040 | -19.83 | 9.86  | 4.44E-02 | -32.45 | 20.21 | 1.08E-01 | -12.13 | 43.64  | 7.81E-01 | -16.15 | 13.30 | 2.24E-01 | -16.15 | 24.57 | 5.11E-01 |
| cg08062858 | -15.93 | 7.92  | 4.44E-02 | -15.28 | 15.59 | 3.27E-01 | 40.02  | 38.80  | 3.02E-01 | -22.71 | 8.21  | 5.67E-03 | 3.15   | 24.77 | 8.99E-01 |
| cg04276977 | 25.08  | 12.47 | 4.44E-02 | 39.80  | 38.61 | 3.03E-01 | 38.75  | 132.58 | 7.70E-01 | 24.53  | 13.74 | 7.42E-02 | 5.85   | 49.85 | 9.07E-01 |
| cg01656750 | 8.80   | 4.38  | 4.44E-02 | 7.45   | 7.84  | 3.42E-01 | 16.47  | 8.92   | 6.49E-02 | 11.88  | 5.32  | 2.55E-02 | -9.73  | 11.21 | 3.85E-01 |
| cg25203962 | 16.50  | 8.21  | 4.44E-02 | 10.00  | 12.59 | 4.27E-01 | 18.88  | 19.67  | 3.37E-01 | 39.14  | 29.87 | 1.90E-01 | 18.48  | 14.39 | 1.99E-01 |
| cg14702264 | -23.84 | 11.86 | 4.44E-02 | -33.15 | 16.08 | 3.92E-02 | -10.52 | 29.67  | 7.23E-01 | -3.87  | 41.69 | 9.26E-01 | -17.70 | 25.53 | 4.88E-01 |
| cg05317275 | 20.92  | 10.41 | 4.44E-02 | 17.47  | 23.03 | 4.48E-01 | 16.70  | 26.88  | 5.34E-01 | 38.97  | 11.43 | 6.53E-04 | 0.64   | 14.72 | 9.66E-01 |
| cg13071069 | 6.54   | 3.26  | 4.44E-02 | 5.16   | 4.03  | 2.00E-01 | 20.01  | 9.60   | 3.72E-02 | 4.55   | 11.16 | 6.83E-01 | 3.31   | 8.51  | 6.97E-01 |
| cg13110779 | 10.55  | 5.25  | 4.44E-02 | 0.63   | 10.27 | 9.51E-01 | 2.08   | 15.56  | 8.94E-01 | 16.74  | 7.83  | 3.26E-02 | 14.89  | 12.46 | 2.32E-01 |
| cg12553292 | -35.56 | 17.69 | 4.44E-02 | -39.97 | 22.36 | 7.39E-02 | -76.53 | 58.65  | 1.92E-01 | 4.99   | 53.07 | 9.25E-01 | -24.06 | 42.63 | 5.72E-01 |
| cg27417606 | -9.26  | 4.61  | 4.44E-02 | -7.46  | 8.14  | 3.60E-01 | -15.18 | 12.04  | 2.07E-01 | -8.48  | 8.26  | 3.05E-01 | -9.05  | 9.76  | 3.54E-01 |
| cg02193425 | -9.61  | 4.78  | 4.44E-02 | -13.21 | 9.34  | 1.57E-01 | -10.92 | 13.22  | 4.09E-01 | -2.65  | 7.61  | 7.27E-01 | -17.31 | 10.38 | 9.54E-02 |
| cg25550629 | -16.45 | 8.19  | 4.44E-02 | -26.21 | 15.96 | 1.00E-01 | -28.15 | 20.40  | 1.68E-01 | -13.05 | 12.44 | 2.94E-01 | 4.35   | 21.64 | 8.41E-01 |
| cg24953922 | 6.74   | 3.35  | 4.44E-02 | 5.52   | 6.66  | 4.07E-01 | 3.93   | 8.84   | 6.57E-01 | 11.52  | 5.12  | 2.45E-02 | -0.94  | 8.04  | 9.07E-01 |
| cg06837242 | 13.74  | 6.83  | 4.44E-02 | 18.79  | 8.26  | 2.28E-02 | 5.13   | 22.61  | 8.21E-01 | -23.76 | 50.16 | 6.36E-01 | 4.05   | 15.11 | 7.89E-01 |
| cg15687000 | -12.66 | 6.30  | 4.44E-02 | -24.09 | 7.74  | 1.85E-03 | -22.00 | 13.81  | 1.11E-01 | -2.60  | 4.65  | 5.76E-01 | -9.00  | 11.07 | 4.16E-01 |
| cg04220482 | 9.46   | 4.70  | 4.44E-02 | 8.26   | 6.79  | 2.23E-01 | 9.63   | 10.93  | 3.78E-01 | 5.87   | 20.42 | 7.74E-01 | 12.06  | 8.88  | 1.74E-01 |
| cg15171839 | 19.98  | 9.94  | 4.44E-02 | 35.07  | 14.78 | 1.77E-02 | -0.97  | 30.33  | 9.74E-01 | 29.32  | 25.88 | 2.57E-01 | -0.34  | 18.37 | 9.85E-01 |
| cg16939391 | -8.93  | 4.44  | 4.44E-02 | -15.01 | 8.64  | 8.24E-02 | -4.05  | 15.09  | 7.88E-01 | -7.29  | 6.49  | 2.61E-01 | -6.64  | 10.50 | 5.27E-01 |

|            |        |       |          |        |       |          |         |        |          |        |       |          |         |       |          |
|------------|--------|-------|----------|--------|-------|----------|---------|--------|----------|--------|-------|----------|---------|-------|----------|
| cg18226166 | 37.60  | 18.70 | 4.44E-02 | 57.56  | 16.53 | 4.99E-04 | 76.28   | 47.67  | 1.10E-01 | -42.13 | 52.97 | 4.26E-01 | 20.18   | 24.73 | 4.15E-01 |
| cg20406374 | -39.32 | 19.56 | 4.44E-02 | -50.49 | 26.72 | 5.88E-02 | -54.22  | 60.60  | 3.71E-01 | 4.37   | 56.74 | 9.39E-01 | -29.56  | 39.84 | 4.58E-01 |
| cg27620077 | -8.70  | 4.33  | 4.44E-02 | -9.70  | 10.80 | 3.69E-01 | -5.17   | 23.48  | 8.26E-01 | -7.31  | 5.18  | 1.58E-01 | -17.23  | 13.15 | 1.90E-01 |
| cg07092805 | 7.60   | 3.78  | 4.44E-02 | 5.49   | 4.88  | 2.60E-01 | 13.41   | 10.27  | 1.91E-01 | 11.25  | 11.12 | 3.12E-01 | 7.99    | 9.83  | 4.16E-01 |
| cg00423195 | 12.55  | 6.24  | 4.44E-02 | -3.46  | 16.26 | 8.32E-01 | -0.25   | 29.31  | 9.93E-01 | 15.65  | 7.33  | 3.28E-02 | 20.89   | 21.68 | 3.35E-01 |
| cg09799633 | -35.68 | 17.75 | 4.44E-02 | -20.61 | 55.90 | 7.12E-01 | -184.21 | 222.41 | 4.08E-01 | -26.65 | 20.08 | 1.84E-01 | -104.26 | 53.23 | 5.01E-02 |
| cg08514311 | -9.06  | 4.51  | 4.44E-02 | -2.86  | 6.88  | 6.78E-01 | -9.59   | 9.54   | 3.15E-01 | -13.34 | 12.78 | 2.97E-01 | -18.01  | 9.52  | 5.85E-02 |
| cg21815063 | -36.41 | 18.12 | 4.44E-02 | -28.13 | 22.98 | 2.21E-01 | -63.00  | 53.56  | 2.40E-01 | -17.51 | 54.97 | 7.50E-01 | -63.22  | 45.97 | 1.69E-01 |
| cg21637282 | 34.48  | 17.16 | 4.44E-02 | 39.98  | 20.56 | 5.18E-02 | -42.97  | 112.31 | 7.02E-01 | 22.29  | 45.80 | 6.27E-01 | 32.30   | 45.91 | 4.82E-01 |
| cg14576286 | 18.65  | 9.28  | 4.44E-02 | 6.87   | 28.12 | 8.07E-01 | -29.71  | 90.97  | 7.44E-01 | 22.31  | 10.25 | 2.95E-02 | -1.33   | 37.54 | 9.72E-01 |
| cg12751277 | -14.02 | 6.98  | 4.44E-02 | -8.70  | 14.48 | 5.48E-01 | 3.08    | 17.43  | 8.60E-01 | -19.08 | 9.67  | 4.85E-02 | -29.42  | 23.63 | 2.13E-01 |
| cg01142693 | 15.07  | 7.50  | 4.45E-02 | 5.37   | 12.67 | 6.72E-01 | 39.17   | 15.80  | 1.32E-02 | 9.07   | 12.44 | 4.66E-01 | 15.22   | 21.70 | 4.83E-01 |
| cg01442781 | 27.83  | 13.85 | 4.45E-02 | 17.53  | 20.10 | 3.83E-01 | 8.72    | 28.76  | 7.62E-01 | 81.82  | 37.93 | 3.10E-02 | 41.04   | 34.56 | 2.35E-01 |
| cg03573702 | -23.20 | 11.54 | 4.45E-02 | -19.70 | 13.65 | 1.49E-01 | -21.58  | 61.87  | 7.27E-01 | 9.30   | 48.94 | 8.49E-01 | -45.76  | 26.23 | 8.11E-02 |
| cg18792365 | 9.83   | 4.89  | 4.45E-02 | -5.42  | 12.25 | 6.58E-01 | 0.23    | 13.57  | 9.87E-01 | 15.18  | 6.14  | 1.34E-02 | 13.61   | 17.89 | 4.47E-01 |
| cg04984556 | 17.02  | 8.47  | 4.45E-02 | 22.43  | 14.78 | 1.29E-01 | 2.53    | 18.37  | 8.90E-01 | 13.71  | 18.22 | 4.52E-01 | 25.36   | 17.19 | 1.40E-01 |
| cg05482956 | 15.65  | 7.79  | 4.45E-02 | 32.71  | 14.03 | 1.98E-02 | -5.12   | 24.92  | 8.37E-01 | 12.81  | 13.16 | 3.30E-01 | 6.51    | 15.75 | 6.79E-01 |
| cg23679478 | 26.69  | 13.28 | 4.45E-02 | 25.75  | 16.08 | 1.09E-01 | -3.27   | 61.18  | 9.57E-01 | -60.86 | 74.14 | 4.12E-01 | 47.08   | 27.20 | 8.34E-02 |
| cg20042338 | -35.46 | 17.64 | 4.45E-02 | -20.40 | 29.65 | 4.91E-01 | 22.78   | 58.82  | 6.99E-01 | -51.82 | 25.93 | 4.57E-02 | -67.59  | 57.82 | 2.42E-01 |
| cg14566661 | 15.98  | 7.95  | 4.45E-02 | 38.25  | 21.66 | 7.74E-02 | -2.27   | 33.49  | 9.46E-01 | 10.41  | 9.22  | 2.59E-01 | 48.86   | 30.99 | 1.15E-01 |
| cg04234680 | 14.16  | 7.05  | 4.45E-02 | 27.56  | 16.31 | 9.11E-02 | 16.87   | 24.60  | 4.93E-01 | 11.72  | 9.75  | 2.29E-01 | 7.24    | 15.42 | 6.39E-01 |
| cg14680360 | -8.12  | 4.04  | 4.45E-02 | -10.90 | 6.93  | 1.16E-01 | 0.26    | 12.96  | 9.84E-01 | -10.07 | 6.30  | 1.10E-01 | -2.02   | 10.33 | 8.45E-01 |
| cg17088155 | -30.87 | 15.36 | 4.45E-02 | -51.50 | 26.77 | 5.44E-02 | -93.20  | 50.64  | 6.57E-02 | -8.71  | 10.15 | 3.91E-01 | -36.42  | 25.60 | 1.55E-01 |
| cg19426388 | -7.66  | 3.81  | 4.45E-02 | -5.16  | 6.50  | 4.28E-01 | -8.98   | 13.11  | 4.93E-01 | -13.21 | 6.48  | 4.16E-02 | -2.48   | 8.01  | 7.57E-01 |
| cg20270653 | -6.76  | 3.37  | 4.45E-02 | -0.73  | 6.50  | 9.10E-01 | -8.68   | 8.84   | 3.26E-01 | -9.68  | 5.05  | 5.55E-02 | -7.08   | 8.90  | 4.27E-01 |
| cg06383401 | -7.48  | 3.72  | 4.45E-02 | 1.28   | 6.98  | 8.55E-01 | -1.80   | 8.43   | 8.31E-01 | -13.68 | 4.68  | 3.43E-03 | -9.55   | 7.52  | 2.04E-01 |
| cg01860370 | 8.78   | 4.37  | 4.45E-02 | -0.05  | 5.93  | 9.94E-01 | 11.75   | 8.45   | 1.65E-01 | 12.08  | 8.86  | 1.72E-01 | 18.99   | 9.02  | 3.52E-02 |
| cg20951539 | -9.23  | 4.59  | 4.45E-02 | -15.05 | 12.14 | 2.15E-01 | -19.22  | 25.77  | 4.56E-01 | -6.28  | 5.40  | 2.45E-01 | -19.07  | 14.48 | 1.88E-01 |
| cg01564818 | 7.63   | 3.80  | 4.45E-02 | 7.15   | 4.98  | 1.51E-01 | 14.11   | 9.98   | 1.57E-01 | 19.97  | 12.03 | 9.67E-02 | -3.21   | 9.09  | 7.24E-01 |
| cg24839693 | -39.92 | 19.87 | 4.45E-02 | -50.04 | 26.04 | 5.46E-02 | -65.17  | 85.43  | 4.46E-01 | 12.68  | 46.93 | 7.87E-01 | -51.66  | 46.23 | 2.64E-01 |
| cg20513777 | 6.69   | 3.33  | 4.45E-02 | 5.89   | 4.34  | 1.75E-01 | 19.59   | 8.72   | 2.48E-02 | 2.96   | 8.13  | 7.16E-01 | -1.25   | 10.60 | 9.06E-01 |
| cg07836413 | 32.82  | 16.33 | 4.45E-02 | 29.73  | 18.81 | 1.14E-01 | -36.90  | 90.91  | 6.85E-01 | -8.56  | 70.48 | 9.03E-01 | 75.22   | 40.79 | 6.51E-02 |
| cg14927663 | 7.63   | 3.80  | 4.45E-02 | 14.74  | 8.70  | 9.03E-02 | 0.72    | 12.99  | 9.56E-01 | 6.65   | 4.69  | 1.57E-01 | 5.88    | 14.46 | 6.84E-01 |
| cg16654610 | -9.24  | 4.60  | 4.45E-02 | -0.89  | 9.11  | 9.22E-01 | -24.65  | 16.25  | 1.29E-01 | -10.65 | 6.14  | 8.29E-02 | -10.20  | 14.19 | 4.72E-01 |
| cg18179931 | 22.72  | 11.31 | 4.45E-02 | 15.34  | 14.39 | 2.86E-01 | 54.30   | 40.13  | 1.76E-01 | 47.94  | 42.68 | 2.61E-01 | 23.89   | 23.40 | 3.07E-01 |

|            |        |       |          |        |       |          |         |        |          |        |       |          |        |       |          |
|------------|--------|-------|----------|--------|-------|----------|---------|--------|----------|--------|-------|----------|--------|-------|----------|
| cg25796963 | 14.19  | 7.06  | 4.45E-02 | 6.57   | 20.34 | 7.47E-01 | 4.61    | 23.61  | 8.45E-01 | 15.00  | 8.31  | 7.11E-02 | 32.12  | 27.33 | 2.40E-01 |
| cg25847771 | -43.50 | 21.65 | 4.45E-02 | -52.54 | 27.58 | 5.68E-02 | 34.18   | 76.34  | 6.54E-01 | -79.76 | 79.63 | 3.17E-01 | -34.77 | 45.20 | 4.42E-01 |
| cg09866303 | 27.76  | 13.82 | 4.45E-02 | 21.55  | 21.08 | 3.07E-01 | 156.84  | 94.39  | 9.66E-02 | 32.30  | 21.87 | 1.40E-01 | 14.99  | 35.77 | 6.75E-01 |
| cg12059104 | 31.21  | 15.53 | 4.45E-02 | 23.27  | 17.81 | 1.91E-01 | 0.34    | 75.78  | 9.96E-01 | 32.28  | 92.64 | 7.27E-01 | 74.39  | 37.76 | 4.89E-02 |
| cg27484386 | 32.04  | 15.95 | 4.45E-02 | -10.76 | 46.08 | 8.15E-01 | -143.84 | 181.64 | 4.28E-01 | 35.09  | 17.69 | 4.73E-02 | 98.82  | 65.10 | 1.29E-01 |
| cg13260916 | 34.96  | 17.40 | 4.45E-02 | 38.97  | 22.91 | 8.90E-02 | 55.66   | 25.37  | 2.82E-02 | 3.83   | 8.37  | 6.47E-01 | 71.75  | 32.72 | 2.83E-02 |
| cg27319710 | 24.05  | 11.97 | 4.45E-02 | 23.67  | 20.71 | 2.53E-01 | -24.13  | 29.91  | 4.20E-01 | 26.40  | 9.93  | 7.86E-03 | 62.45  | 29.18 | 3.23E-02 |
| cg02594183 | -14.02 | 6.98  | 4.45E-02 | -32.35 | 12.60 | 1.02E-02 | -1.31   | 14.76  | 9.29E-01 | -6.38  | 10.38 | 5.39E-01 | -16.95 | 16.26 | 2.97E-01 |
| cg13875003 | 10.24  | 5.10  | 4.45E-02 | 4.19   | 7.26  | 5.64E-01 | 19.20   | 12.94  | 1.38E-01 | 13.90  | 13.37 | 2.99E-01 | 15.36  | 11.21 | 1.71E-01 |
| cg20648975 | -19.85 | 9.88  | 4.45E-02 | -1.56  | 31.01 | 9.60E-01 | -26.65  | 139.47 | 8.48E-01 | -20.45 | 10.90 | 6.05E-02 | -38.36 | 36.95 | 2.99E-01 |
| cg01785490 | -8.78  | 4.37  | 4.45E-02 | -22.61 | 10.88 | 3.77E-02 | -5.63   | 13.63  | 6.80E-01 | -6.99  | 5.54  | 2.07E-01 | -1.75  | 13.03 | 8.93E-01 |
| cg07706471 | 13.85  | 6.89  | 4.45E-02 | 19.09  | 19.65 | 3.31E-01 | 60.55   | 65.61  | 3.56E-01 | 13.73  | 7.80  | 7.83E-02 | 1.18   | 23.77 | 9.60E-01 |
| cg21531126 | -7.83  | 3.90  | 4.46E-02 | -8.78  | 8.85  | 3.21E-01 | 5.98    | 14.30  | 6.76E-01 | -9.94  | 4.91  | 4.29E-02 | -3.02  | 12.22 | 8.05E-01 |
| cg15641565 | 21.25  | 10.58 | 4.46E-02 | 42.52  | 16.17 | 8.56E-03 | -5.02   | 18.99  | 7.92E-01 | 24.05  | 20.49 | 2.40E-01 | 16.89  | 21.46 | 4.31E-01 |
| cg19920283 | 34.97  | 17.41 | 4.46E-02 | 30.73  | 21.74 | 1.57E-01 | 13.80   | 74.71  | 8.53E-01 | 63.50  | 91.65 | 4.88E-01 | 45.53  | 33.60 | 1.75E-01 |
| cg09672570 | 23.87  | 11.89 | 4.46E-02 | 18.14  | 24.38 | 4.57E-01 | 5.47    | 59.27  | 9.26E-01 | 22.61  | 15.13 | 1.35E-01 | 51.29  | 36.64 | 1.62E-01 |
| cg27099088 | -9.25  | 4.61  | 4.46E-02 | -15.33 | 10.84 | 1.57E-01 | -17.29  | 13.00  | 1.84E-01 | -5.55  | 6.08  | 3.61E-01 | -9.40  | 13.28 | 4.79E-01 |
| cg08260622 | 16.99  | 8.46  | 4.46E-02 | 25.06  | 17.96 | 1.63E-01 | 26.42   | 21.53  | 2.20E-01 | 9.18   | 11.67 | 4.31E-01 | 25.64  | 26.92 | 3.41E-01 |
| cg09032487 | 28.19  | 14.04 | 4.46E-02 | 38.80  | 20.64 | 6.01E-02 | 21.14   | 28.72  | 4.62E-01 | 8.38   | 40.49 | 8.36E-01 | 23.49  | 33.23 | 4.80E-01 |
| cg12785993 | -11.97 | 5.96  | 4.46E-02 | -30.63 | 15.76 | 5.18E-02 | -7.59   | 12.08  | 5.30E-01 | -7.66  | 8.45  | 3.65E-01 | -16.56 | 17.44 | 3.42E-01 |
| cg09502069 | -13.88 | 6.91  | 4.46E-02 | -19.83 | 9.38  | 3.45E-02 | -20.36  | 29.17  | 4.85E-01 | -27.19 | 23.99 | 2.57E-01 | 0.86   | 12.23 | 9.44E-01 |
| cg23058673 | 14.69  | 7.31  | 4.46E-02 | 7.33   | 11.64 | 5.29E-01 | 23.77   | 12.79  | 6.31E-02 | 23.84  | 20.11 | 2.36E-01 | 5.95   | 19.17 | 7.57E-01 |
| cg05289320 | 16.69  | 8.31  | 4.46E-02 | -2.32  | 17.16 | 8.92E-01 | 34.80   | 18.00  | 5.31E-02 | 14.59  | 12.56 | 2.45E-01 | 29.78  | 24.47 | 2.24E-01 |
| cg11823736 | -7.59  | 3.78  | 4.46E-02 | -11.29 | 9.41  | 2.30E-01 | 2.65    | 16.56  | 8.73E-01 | -9.77  | 4.58  | 3.30E-02 | 6.81   | 11.53 | 5.54E-01 |
| cg04678623 | -8.39  | 4.18  | 4.46E-02 | -3.80  | 5.39  | 4.80E-01 | -20.03  | 9.64   | 3.78E-02 | -11.34 | 21.63 | 6.00E-01 | -11.11 | 10.05 | 2.69E-01 |
| cg27359501 | 20.02  | 9.97  | 4.46E-02 | 2.85   | 22.55 | 8.99E-01 | -9.18   | 56.77  | 8.71E-01 | 27.50  | 12.12 | 2.32E-02 | 11.69  | 31.89 | 7.14E-01 |
| cg03610228 | 7.05   | 3.51  | 4.46E-02 | 2.22   | 4.94  | 6.53E-01 | 10.92   | 5.40   | 4.31E-02 | -1.67  | 7.94  | 8.34E-01 | 14.62  | 6.06  | 1.59E-02 |
| cg11695030 | 30.99  | 15.43 | 4.46E-02 | 29.30  | 19.41 | 1.31E-01 | 37.50   | 87.52  | 6.68E-01 | 121.09 | 89.48 | 1.76E-01 | 25.08  | 27.84 | 3.68E-01 |
| cg11538128 | 15.08  | 7.51  | 4.46E-02 | 14.12  | 8.13  | 8.23E-02 | 70.04   | 83.05  | 3.99E-01 | 69.38  | 44.96 | 1.23E-01 | 4.70   | 22.64 | 8.35E-01 |
| cg17185622 | 12.66  | 6.30  | 4.46E-02 | 14.55  | 13.53 | 2.82E-01 | -7.30   | 22.34  | 7.44E-01 | 16.31  | 8.30  | 4.94E-02 | 5.31   | 17.72 | 7.64E-01 |
| cg08672919 | 7.98   | 3.97  | 4.46E-02 | 12.43  | 11.29 | 2.71E-01 | 2.58    | 12.13  | 8.32E-01 | 7.82   | 4.80  | 1.03E-01 | 9.68   | 13.78 | 4.82E-01 |
| cg23962849 | -23.88 | 11.89 | 4.46E-02 | -13.54 | 17.80 | 4.47E-01 | -60.60  | 26.86  | 2.40E-02 | -19.65 | 26.96 | 4.66E-01 | -13.11 | 29.38 | 6.55E-01 |
| cg11357013 | 5.21   | 2.59  | 4.46E-02 | 3.73   | 3.29  | 2.57E-01 | 12.13   | 6.59   | 6.55E-02 | 11.57  | 8.55  | 1.76E-01 | -0.35  | 7.09  | 9.60E-01 |
| cg12499316 | -8.41  | 4.19  | 4.46E-02 | -8.09  | 7.03  | 2.50E-01 | -18.08  | 13.90  | 1.93E-01 | -4.63  | 6.46  | 4.74E-01 | -14.46 | 11.37 | 2.04E-01 |
| cg05909343 | -30.41 | 15.14 | 4.46E-02 | -27.72 | 19.03 | 1.45E-01 | 32.44   | 77.59  | 6.76E-01 | -85.12 | 45.54 | 6.16E-02 | -21.45 | 32.39 | 5.08E-01 |

|            |        |       |          |        |       |          |         |        |          |        |       |          |        |       |          |
|------------|--------|-------|----------|--------|-------|----------|---------|--------|----------|--------|-------|----------|--------|-------|----------|
| cg13041597 | 13.23  | 6.59  | 4.46E-02 | 19.88  | 8.20  | 1.53E-02 | 9.41    | 13.34  | 4.80E-01 | 35.03  | 20.16 | 8.22E-02 | -1.57  | 10.88 | 8.85E-01 |
| cg15115563 | -30.91 | 15.39 | 4.46E-02 | -66.62 | 36.95 | 7.14E-02 | -24.76  | 170.01 | 8.84E-01 | -20.95 | 18.02 | 2.45E-01 | -43.52 | 51.69 | 4.00E-01 |
| cg13721907 | -5.71  | 2.84  | 4.46E-02 | -6.63  | 4.98  | 1.83E-01 | -13.44  | 7.28   | 6.51E-02 | -2.33  | 4.80  | 6.28E-01 | -3.99  | 6.86  | 5.61E-01 |
| cg24421504 | -29.38 | 14.63 | 4.46E-02 | -44.34 | 37.24 | 2.34E-01 | -169.03 | 143.06 | 2.37E-01 | -25.26 | 16.85 | 1.34E-01 | -21.15 | 51.24 | 6.80E-01 |
| cg08621445 | -7.47  | 3.72  | 4.46E-02 | -13.31 | 5.47  | 1.49E-02 | -6.91   | 8.13   | 3.95E-01 | -0.04  | 8.70  | 9.97E-01 | 1.02   | 9.78  | 9.17E-01 |
| cg22307297 | 13.10  | 6.52  | 4.46E-02 | 4.47   | 11.41 | 6.95E-01 | 23.72   | 11.86  | 4.55E-02 | 7.34   | 14.26 | 6.07E-01 | 18.14  | 16.24 | 2.64E-01 |
| cg15829294 | 22.56  | 11.24 | 4.46E-02 | 21.73  | 20.80 | 2.96E-01 | -34.14  | 70.11  | 6.26E-01 | 20.23  | 15.22 | 1.84E-01 | 44.13  | 30.29 | 1.45E-01 |
| cg16371860 | 9.22   | 4.59  | 4.46E-02 | 7.91   | 6.52  | 2.25E-01 | -4.10   | 11.35  | 7.18E-01 | 18.73  | 10.67 | 7.93E-02 | 16.03  | 11.62 | 1.68E-01 |
| cg12146703 | -10.36 | 5.16  | 4.47E-02 | -29.77 | 12.58 | 1.79E-02 | -11.69  | 16.76  | 4.86E-01 | -5.23  | 6.14  | 3.94E-01 | -10.01 | 15.87 | 5.28E-01 |
| cg11844827 | -30.32 | 15.10 | 4.47E-02 | -16.53 | 31.48 | 6.00E-01 | -176.57 | 169.49 | 2.98E-01 | -39.58 | 18.28 | 3.04E-02 | 23.66  | 53.45 | 6.58E-01 |
| cg05768005 | 6.71   | 3.34  | 4.47E-02 | 5.19   | 4.21  | 2.18E-01 | 9.86    | 7.83   | 2.08E-01 | 10.84  | 14.26 | 4.47E-01 | 7.88   | 9.13  | 3.88E-01 |
| cg01053714 | -9.72  | 4.84  | 4.47E-02 | -14.89 | 9.89  | 1.32E-01 | -3.58   | 17.00  | 8.33E-01 | -8.04  | 6.39  | 2.08E-01 | -11.94 | 15.02 | 4.27E-01 |
| cg22368204 | -12.46 | 6.21  | 4.47E-02 | -17.80 | 8.97  | 4.73E-02 | -29.13  | 15.19  | 5.51E-02 | -6.45  | 14.39 | 6.54E-01 | 1.98   | 11.59 | 8.65E-01 |
| cg06791100 | -13.25 | 6.60  | 4.47E-02 | -15.67 | 20.47 | 4.44E-01 | 3.89    | 24.99  | 8.76E-01 | -16.98 | 7.46  | 2.29E-02 | 31.52  | 31.43 | 3.16E-01 |
| cg07900344 | -12.65 | 6.30  | 4.47E-02 | -18.86 | 9.03  | 3.69E-02 | -1.60   | 16.61  | 9.23E-01 | -5.93  | 15.72 | 7.06E-01 | -10.98 | 13.79 | 4.26E-01 |
| cg02926127 | 23.85  | 11.88 | 4.47E-02 | 25.00  | 17.03 | 1.42E-01 | 22.71   | 27.35  | 4.06E-01 | 33.15  | 36.55 | 3.64E-01 | 17.80  | 25.37 | 4.83E-01 |
| cg06501721 | -10.72 | 5.34  | 4.47E-02 | -18.93 | 11.73 | 1.07E-01 | -8.82   | 21.69  | 6.84E-01 | -8.23  | 6.67  | 2.17E-01 | -10.92 | 17.84 | 5.41E-01 |
| cg21808707 | -28.79 | 14.34 | 4.47E-02 | -14.93 | 18.61 | 4.22E-01 | -85.49  | 42.03  | 4.19E-02 | -21.97 | 39.50 | 5.78E-01 | -44.72 | 36.04 | 2.15E-01 |
| cg11004117 | -16.43 | 8.19  | 4.47E-02 | -32.59 | 13.98 | 1.98E-02 | -10.03  | 21.10  | 6.35E-01 | -6.10  | 17.10 | 7.21E-01 | -8.49  | 15.53 | 5.85E-01 |
| cg08254399 | -13.65 | 6.80  | 4.47E-02 | -33.88 | 15.31 | 2.69E-02 | -7.70   | 21.12  | 7.15E-01 | -9.94  | 8.73  | 2.55E-01 | -1.47  | 22.43 | 9.48E-01 |
| cg16898822 | 23.14  | 11.53 | 4.47E-02 | 28.38  | 14.30 | 4.72E-02 | -18.48  | 33.81  | 5.85E-01 | 2.38   | 45.20 | 9.58E-01 | 39.65  | 28.06 | 1.58E-01 |
| cg23953396 | 17.01  | 8.47  | 4.47E-02 | 43.11  | 40.13 | 2.83E-01 | -42.46  | 136.69 | 7.56E-01 | 15.93  | 8.99  | 7.65E-02 | 17.28  | 33.41 | 6.05E-01 |
| cg22954171 | 9.28   | 4.62  | 4.47E-02 | 9.18   | 6.43  | 1.53E-01 | 10.81   | 9.54   | 2.57E-01 | 14.33  | 13.75 | 2.97E-01 | 2.79   | 12.55 | 8.24E-01 |
| cg24362726 | -6.34  | 3.16  | 4.47E-02 | -9.52  | 4.76  | 4.56E-02 | -2.17   | 7.07   | 7.59E-01 | -5.40  | 9.14  | 5.55E-01 | -4.46  | 6.45  | 4.89E-01 |
| cg23533254 | -15.41 | 7.68  | 4.47E-02 | 3.25   | 27.78 | 9.07E-01 | 80.29   | 92.61  | 3.86E-01 | -16.87 | 8.30  | 4.20E-02 | -29.30 | 31.30 | 3.49E-01 |
| cg14151372 | -10.68 | 5.32  | 4.47E-02 | -13.31 | 8.70  | 1.26E-01 | -12.28  | 11.60  | 2.90E-01 | -6.22  | 12.07 | 6.06E-01 | -8.64  | 11.30 | 4.45E-01 |
| cg22612734 | 8.75   | 4.36  | 4.47E-02 | 1.70   | 9.31  | 8.55E-01 | 9.20    | 13.48  | 4.95E-01 | 12.70  | 5.67  | 2.52E-02 | -0.95  | 14.88 | 9.49E-01 |
| cg09814127 | 7.80   | 3.89  | 4.47E-02 | 9.27   | 6.79  | 1.72E-01 | 7.99    | 7.85   | 3.08E-01 | 6.80   | 8.31  | 4.13E-01 | 6.32   | 8.52  | 4.58E-01 |
| cg23699916 | 9.13   | 4.55  | 4.47E-02 | 10.19  | 12.13 | 4.01E-01 | 7.03    | 11.32  | 5.34E-01 | 10.39  | 5.99  | 8.26E-02 | 4.67   | 13.09 | 7.21E-01 |
| cg00299893 | 18.74  | 9.34  | 4.47E-02 | 13.07  | 16.41 | 4.26E-01 | 18.41   | 18.69  | 3.25E-01 | 6.26   | 16.79 | 7.09E-01 | 56.02  | 23.95 | 1.94E-02 |
| cg26634132 | -24.56 | 12.24 | 4.47E-02 | -26.62 | 16.97 | 1.17E-01 | -0.71   | 32.84  | 9.83E-01 | -50.54 | 51.24 | 3.24E-01 | -27.22 | 22.96 | 2.36E-01 |
| cg07904073 | 7.20   | 3.59  | 4.47E-02 | 6.19   | 4.50  | 1.69E-01 | 16.95   | 9.63   | 7.83E-02 | 11.50  | 16.60 | 4.88E-01 | 2.08   | 8.54  | 8.08E-01 |
| cg14404842 | -7.65  | 3.81  | 4.47E-02 | -6.93  | 5.84  | 2.36E-01 | -6.64   | 7.55   | 3.79E-01 | -10.08 | 9.85  | 3.06E-01 | -8.87  | 9.28  | 3.39E-01 |
| cg04949226 | 30.41  | 15.15 | 4.47E-02 | 9.26   | 22.71 | 6.84E-01 | 56.73   | 23.27  | 1.48E-02 | 8.40   | 13.81 | 5.43E-01 | 68.58  | 28.98 | 1.80E-02 |
| cg19504184 | 8.95   | 4.46  | 4.47E-02 | 9.73   | 5.97  | 1.03E-01 | 11.16   | 11.54  | 3.33E-01 | 15.92  | 11.73 | 1.75E-01 | -3.09  | 11.62 | 7.90E-01 |

|            |        |       |          |         |       |          |         |        |          |        |       |          |        |       |          |
|------------|--------|-------|----------|---------|-------|----------|---------|--------|----------|--------|-------|----------|--------|-------|----------|
| cg03006477 | -8.93  | 4.45  | 4.47E-02 | -7.60   | 6.18  | 2.19E-01 | -3.96   | 9.06   | 6.62E-01 | 2.70   | 13.21 | 8.38E-01 | -22.06 | 9.00  | 1.42E-02 |
| cg13593192 | -5.30  | 2.64  | 4.47E-02 | -10.83  | 5.43  | 4.62E-02 | 1.85    | 7.33   | 8.00E-01 | -5.57  | 3.70  | 1.32E-01 | -1.18  | 7.46  | 8.74E-01 |
| cg17959486 | -11.09 | 5.53  | 4.47E-02 | -14.11  | 10.56 | 1.82E-01 | 5.77    | 26.32  | 8.27E-01 | -10.60 | 7.27  | 1.44E-01 | -13.03 | 17.19 | 4.48E-01 |
| cg19512693 | -42.13 | 20.99 | 4.48E-02 | -43.63  | 25.48 | 8.68E-02 | 23.15   | 40.31  | 5.66E-01 | -83.40 | 34.63 | 1.60E-02 | -57.68 | 50.47 | 2.53E-01 |
| cg01385669 | 23.20  | 11.56 | 4.48E-02 | 35.71   | 22.44 | 1.12E-01 | 37.60   | 27.25  | 1.68E-01 | 3.29   | 15.08 | 8.27E-01 | 55.30  | 31.98 | 8.37E-02 |
| cg16648524 | 11.94  | 5.95  | 4.48E-02 | 21.41   | 8.81  | 1.51E-02 | -0.29   | 14.61  | 9.84E-01 | 11.31  | 14.92 | 4.49E-01 | 1.92   | 12.74 | 8.80E-01 |
| cg24293689 | -15.41 | 7.68  | 4.48E-02 | -8.26   | 15.77 | 6.01E-01 | 16.72   | 41.47  | 6.87E-01 | -20.63 | 9.62  | 3.20E-02 | -9.62  | 25.29 | 7.04E-01 |
| cg14544289 | 9.11   | 4.54  | 4.48E-02 | 12.38   | 6.43  | 5.44E-02 | 12.21   | 9.56   | 2.02E-01 | -2.31  | 15.46 | 8.81E-01 | 2.09   | 10.37 | 8.40E-01 |
| cg26870961 | 29.00  | 14.45 | 4.48E-02 | 55.13   | 20.55 | 7.30E-03 | 29.06   | 27.08  | 2.83E-01 | -2.29  | 19.52 | 9.06E-01 | 42.74  | 32.48 | 1.88E-01 |
| cg06948825 | -39.81 | 19.84 | 4.48E-02 | -42.71  | 25.53 | 9.44E-02 | -134.87 | 126.04 | 2.85E-01 | 23.74  | 73.56 | 7.47E-01 | -41.54 | 36.29 | 2.52E-01 |
| cg16962008 | 10.37  | 5.17  | 4.48E-02 | 10.14   | 8.92  | 2.55E-01 | 9.49    | 12.58  | 4.51E-01 | 22.04  | 9.85  | 2.53E-02 | -3.20  | 11.02 | 7.71E-01 |
| cg04449785 | -22.47 | 11.20 | 4.48E-02 | -62.07  | 42.72 | 1.46E-01 | 22.49   | 184.71 | 9.03E-01 | -21.75 | 12.07 | 7.16E-02 | 6.24   | 43.10 | 8.85E-01 |
| cg23533139 | 20.93  | 10.43 | 4.48E-02 | 13.89   | 15.36 | 3.66E-01 | 31.39   | 27.66  | 2.56E-01 | 47.78  | 26.87 | 7.54E-02 | 11.65  | 21.02 | 5.80E-01 |
| cg23520075 | 21.52  | 10.72 | 4.48E-02 | 15.11   | 27.14 | 5.78E-01 | -30.16  | 116.60 | 7.96E-01 | 21.44  | 12.19 | 7.88E-02 | 45.62  | 42.99 | 2.89E-01 |
| cg12666221 | -17.04 | 8.49  | 4.48E-02 | -10.75  | 20.64 | 6.03E-01 | -10.80  | 15.10  | 4.74E-01 | -19.56 | 13.05 | 1.34E-01 | -38.91 | 28.25 | 1.68E-01 |
| cg16521454 | 14.64  | 7.30  | 4.48E-02 | 31.91   | 10.99 | 3.68E-03 | 17.20   | 15.97  | 2.81E-01 | 6.56   | 11.43 | 5.66E-01 | 1.42   | 12.47 | 9.09E-01 |
| cg15518345 | -29.87 | 14.88 | 4.48E-02 | -43.17  | 18.17 | 1.75E-02 | 20.68   | 61.49  | 7.37E-01 | -11.08 | 54.24 | 8.38E-01 | -6.60  | 33.67 | 8.45E-01 |
| cg17519570 | -40.76 | 20.31 | 4.48E-02 | -26.74  | 26.12 | 3.06E-01 | 22.04   | 89.26  | 8.05E-01 | -42.40 | 84.64 | 6.16E-01 | -81.42 | 37.98 | 3.20E-02 |
| cg26349957 | -8.80  | 4.39  | 4.48E-02 | -13.49  | 11.76 | 2.51E-01 | -9.44   | 17.20  | 5.83E-01 | -6.93  | 5.24  | 1.86E-01 | -15.27 | 14.19 | 2.82E-01 |
| cg21767036 | 19.06  | 9.50  | 4.48E-02 | 9.00    | 19.17 | 6.39E-01 | 15.78   | 32.09  | 6.23E-01 | 19.45  | 12.64 | 1.24E-01 | 44.04  | 29.81 | 1.39E-01 |
| cg10995925 | -8.03  | 4.00  | 4.48E-02 | -8.54   | 6.19  | 1.67E-01 | -10.06  | 10.33  | 3.30E-01 | -4.01  | 8.24  | 6.26E-01 | -10.26 | 9.07  | 2.58E-01 |
| cg26286082 | -10.33 | 5.15  | 4.48E-02 | -12.30  | 8.22  | 1.35E-01 | 10.68   | 14.90  | 4.73E-01 | -15.07 | 12.05 | 2.11E-01 | -13.19 | 9.32  | 1.57E-01 |
| cg04340435 | 8.60   | 4.29  | 4.48E-02 | 11.52   | 6.18  | 6.23E-02 | 15.36   | 11.14  | 1.68E-01 | 7.65   | 9.49  | 4.21E-01 | -4.65  | 10.50 | 6.58E-01 |
| cg09863252 | 29.43  | 14.67 | 4.48E-02 | 67.75   | 39.11 | 8.33E-02 | -85.42  | 132.76 | 5.20E-01 | 21.81  | 16.75 | 1.93E-01 | 52.43  | 51.67 | 3.10E-01 |
| cg10075819 | -7.98  | 3.98  | 4.48E-02 | -11.21  | 5.29  | 3.40E-02 | -6.08   | 9.61   | 5.27E-01 | -10.01 | 14.24 | 4.82E-01 | 0.98   | 9.23  | 9.16E-01 |
| cg13277385 | 50.59  | 25.21 | 4.48E-02 | 48.42   | 32.38 | 1.35E-01 | -129.44 | 135.76 | 3.40E-01 | 96.68  | 75.14 | 1.98E-01 | 60.06  | 50.77 | 2.37E-01 |
| cg00530650 | 15.89  | 7.92  | 4.48E-02 | 19.91   | 17.08 | 2.44E-01 | 29.94   | 18.24  | 1.01E-01 | 3.26   | 11.63 | 7.79E-01 | 33.53  | 21.72 | 1.23E-01 |
| cg14664412 | 4.61   | 2.30  | 4.48E-02 | 4.49    | 3.04  | 1.40E-01 | 6.53    | 5.07   | 1.98E-01 | 1.27   | 6.91  | 8.55E-01 | 5.01   | 6.84  | 4.64E-01 |
| cg19279042 | -10.57 | 5.27  | 4.48E-02 | -6.64   | 7.56  | 3.79E-01 | -17.21  | 13.91  | 2.16E-01 | -7.80  | 12.87 | 5.45E-01 | -17.55 | 11.69 | 1.33E-01 |
| cg13714844 | -13.92 | 6.94  | 4.48E-02 | -15.00  | 14.26 | 2.93E-01 | -7.19   | 20.96  | 7.32E-01 | -10.37 | 9.45  | 2.72E-01 | -34.90 | 20.52 | 8.91E-02 |
| cg23197473 | -13.00 | 6.48  | 4.48E-02 | -6.17   | 9.75  | 5.27E-01 | -19.43  | 13.75  | 1.58E-01 | -16.44 | 25.65 | 5.22E-01 | -18.02 | 12.40 | 1.46E-01 |
| cg24963024 | -14.59 | 7.27  | 4.48E-02 | -17.81  | 14.88 | 2.31E-01 | -28.75  | 23.13  | 2.14E-01 | -13.06 | 9.86  | 1.85E-01 | -3.28  | 21.18 | 8.77E-01 |
| cg11058730 | -35.80 | 17.84 | 4.48E-02 | -100.98 | 44.83 | 2.43E-02 | -20.97  | 181.71 | 9.08E-01 | -30.69 | 20.41 | 1.33E-01 | 7.26   | 45.61 | 8.73E-01 |
| cg01527159 | -12.51 | 6.24  | 4.48E-02 | -2.47   | 14.28 | 8.63E-01 | -18.12  | 9.96   | 6.87E-02 | -16.19 | 11.68 | 1.66E-01 | -2.39  | 17.19 | 8.89E-01 |
| cg20639618 | 5.65   | 2.82  | 4.48E-02 | 4.51    | 2.69  | 9.33E-02 | 8.75    | 4.32   | 4.30E-02 | 15.77  | 7.23  | 2.92E-02 | -2.03  | 5.17  | 6.94E-01 |

|            |        |       |          |        |       |          |        |        |          |        |       |          |        |       |          |
|------------|--------|-------|----------|--------|-------|----------|--------|--------|----------|--------|-------|----------|--------|-------|----------|
| cg21348210 | 18.53  | 9.23  | 4.48E-02 | 19.96  | 27.46 | 4.67E-01 | -14.60 | 79.02  | 8.53E-01 | 21.21  | 10.93 | 5.23E-02 | 8.30   | 23.15 | 7.20E-01 |
| cg20075114 | -14.49 | 7.22  | 4.48E-02 | -23.50 | 12.99 | 7.05E-02 | -10.84 | 16.65  | 5.15E-01 | -6.90  | 12.39 | 5.77E-01 | -17.43 | 17.90 | 3.30E-01 |
| cg15920561 | -17.18 | 8.56  | 4.48E-02 | -38.12 | 14.27 | 7.57E-03 | -21.43 | 17.85  | 2.30E-01 | -6.29  | 13.42 | 6.39E-01 | -1.60  | 16.85 | 9.24E-01 |
| cg13567205 | -13.24 | 6.60  | 4.48E-02 | -19.36 | 11.13 | 8.19E-02 | -4.35  | 17.45  | 8.03E-01 | -21.10 | 14.46 | 1.44E-01 | -4.74  | 12.12 | 6.96E-01 |
| cg22389654 | -17.26 | 8.60  | 4.48E-02 | -31.33 | 13.57 | 2.10E-02 | -5.90  | 19.44  | 7.62E-01 | -4.16  | 19.53 | 8.31E-01 | -12.98 | 18.83 | 4.91E-01 |
| cg00431336 | 21.73  | 10.83 | 4.48E-02 | 8.21   | 22.75 | 7.18E-01 | 16.25  | 22.18  | 4.64E-01 | 16.42  | 12.31 | 1.82E-01 | 73.61  | 29.62 | 1.30E-02 |
| cg13716104 | 26.64  | 13.28 | 4.49E-02 | 27.18  | 18.00 | 1.31E-01 | 42.90  | 39.22  | 2.74E-01 | 42.87  | 39.93 | 2.83E-01 | 9.51   | 27.63 | 7.31E-01 |
| cg09779537 | 14.91  | 7.43  | 4.49E-02 | 41.43  | 21.32 | 5.20E-02 | 10.99  | 30.28  | 7.17E-01 | 11.95  | 8.49  | 1.59E-01 | 1.03   | 32.63 | 9.75E-01 |
| cg15702437 | 41.13  | 20.50 | 4.49E-02 | 39.95  | 25.13 | 1.12E-01 | 153.43 | 133.43 | 2.50E-01 | 20.89  | 72.06 | 7.72E-01 | 40.15  | 42.80 | 3.48E-01 |
| cg17384865 | 14.25  | 7.10  | 4.49E-02 | 28.88  | 22.13 | 1.92E-01 | -16.75 | 27.83  | 5.47E-01 | 12.91  | 8.00  | 1.07E-01 | 50.06  | 33.93 | 1.40E-01 |
| cg08446111 | 14.17  | 7.06  | 4.49E-02 | 36.19  | 12.60 | 4.06E-03 | 2.12   | 12.80  | 8.68E-01 | 9.80   | 7.95  | 2.17E-01 | 10.32  | 16.62 | 5.35E-01 |
| cg20322977 | 8.66   | 4.32  | 4.49E-02 | 7.17   | 6.10  | 2.40E-01 | 12.19  | 11.55  | 2.91E-01 | 10.33  | 10.30 | 3.16E-01 | 8.46   | 10.10 | 4.02E-01 |
| cg05648510 | 6.12   | 3.05  | 4.49E-02 | 7.17   | 4.04  | 7.60E-02 | 6.16   | 6.24   | 3.23E-01 | 17.32  | 12.98 | 1.82E-01 | -2.91  | 8.27  | 7.25E-01 |
| cg14949309 | -11.67 | 5.82  | 4.49E-02 | -7.43  | 17.31 | 6.68E-01 | 9.80   | 15.37  | 5.24E-01 | -17.08 | 7.02  | 1.49E-02 | -8.72  | 24.74 | 7.24E-01 |
| cg01663016 | 13.09  | 6.53  | 4.49E-02 | 22.54  | 12.67 | 7.53E-02 | 10.41  | 19.03  | 5.84E-01 | 14.99  | 10.71 | 1.62E-01 | 1.31   | 13.16 | 9.21E-01 |
| cg14381986 | -17.77 | 8.86  | 4.49E-02 | -31.99 | 18.03 | 7.60E-02 | -66.54 | 55.07  | 2.27E-01 | -7.56  | 11.29 | 5.03E-01 | -31.30 | 25.87 | 2.26E-01 |
| cg01257194 | 8.66   | 4.32  | 4.49E-02 | 9.28   | 6.01  | 1.22E-01 | 15.16  | 9.70   | 1.18E-01 | 16.06  | 12.57 | 2.01E-01 | -6.05  | 10.50 | 5.64E-01 |
| cg21667878 | 13.58  | 6.77  | 4.49E-02 | 7.65   | 15.59 | 6.24E-01 | 1.70   | 26.01  | 9.48E-01 | 7.82   | 9.88  | 4.29E-01 | 30.41  | 12.92 | 1.86E-02 |
| cg20554277 | -6.35  | 3.17  | 4.49E-02 | -11.65 | 5.86  | 4.68E-02 | 3.16   | 8.88   | 7.22E-01 | -7.69  | 4.88  | 1.15E-01 | -0.69  | 7.94  | 9.31E-01 |
| cg03400849 | -6.12  | 3.05  | 4.49E-02 | -13.71 | 6.33  | 3.04E-02 | -2.81  | 8.30   | 7.35E-01 | -2.13  | 4.29  | 6.19E-01 | -11.68 | 8.58  | 1.73E-01 |
| cg08159033 | -8.65  | 4.31  | 4.49E-02 | -9.17  | 7.01  | 1.90E-01 | -15.84 | 9.47   | 9.44E-02 | 1.36   | 9.53  | 8.87E-01 | -10.36 | 9.44  | 2.72E-01 |
| cg27074985 | 19.43  | 9.69  | 4.49E-02 | 2.90   | 32.63 | 9.29E-01 | 21.11  | 141.06 | 8.81E-01 | 18.19  | 10.50 | 8.33E-02 | 63.42  | 40.64 | 1.19E-01 |
| cg23628232 | 19.07  | 9.51  | 4.49E-02 | 21.90  | 12.48 | 7.93E-02 | 6.85   | 35.01  | 8.45E-01 | 60.12  | 34.54 | 8.18E-02 | 4.82   | 18.28 | 7.92E-01 |
| cg13935548 | -12.60 | 6.28  | 4.49E-02 | -21.03 | 17.92 | 2.41E-01 | -15.86 | 25.49  | 5.34E-01 | -10.48 | 7.37  | 1.55E-01 | -16.06 | 20.97 | 4.44E-01 |
| cg02709139 | -11.15 | 5.56  | 4.49E-02 | -28.74 | 12.04 | 1.69E-02 | -8.45  | 16.56  | 6.10E-01 | -4.87  | 6.35  | 4.43E-01 | -17.02 | 17.59 | 3.33E-01 |
| cg27631724 | 14.01  | 6.99  | 4.49E-02 | -0.83  | 4.99  | 8.68E-01 | 21.69  | 8.00   | 6.68E-03 | 31.94  | 14.32 | 2.57E-02 | 14.65  | 7.17  | 4.09E-02 |
| cg23024047 | 8.88   | 4.43  | 4.49E-02 | 10.43  | 6.14  | 8.94E-02 | 10.87  | 12.10  | 3.69E-01 | -4.63  | 13.44 | 7.30E-01 | 10.56  | 9.10  | 2.46E-01 |
| cg10747682 | 33.92  | 16.91 | 4.49E-02 | 64.73  | 40.65 | 1.11E-01 | -64.89 | 229.52 | 7.77E-01 | 36.22  | 19.58 | 6.43E-02 | -52.49 | 61.59 | 3.94E-01 |
| cg05147262 | -9.75  | 4.86  | 4.49E-02 | -2.49  | 10.35 | 8.10E-01 | -3.94  | 33.35  | 9.06E-01 | -11.40 | 5.81  | 4.99E-02 | -19.56 | 20.13 | 3.31E-01 |
| cg27395891 | 17.23  | 8.59  | 4.49E-02 | 5.09   | 12.19 | 6.76E-01 | 27.91  | 27.26  | 3.06E-01 | 23.63  | 33.37 | 4.79E-01 | 30.71  | 14.79 | 3.79E-02 |
| cg21088119 | -8.89  | 4.43  | 4.49E-02 | -13.68 | 7.08  | 5.32E-02 | 1.91   | 10.14  | 8.50E-01 | -2.89  | 9.87  | 7.70E-01 | -15.43 | 9.58  | 1.07E-01 |
| cg02510802 | -21.53 | 10.74 | 4.49E-02 | -28.73 | 16.98 | 9.06E-02 | 4.90   | 43.47  | 9.10E-01 | -26.21 | 23.30 | 2.61E-01 | -14.61 | 18.78 | 4.37E-01 |
| cg06572974 | -17.58 | 8.77  | 4.49E-02 | -15.33 | 21.24 | 4.71E-01 | -52.06 | 45.92  | 2.57E-01 | -18.53 | 10.46 | 7.67E-02 | -0.74  | 29.05 | 9.80E-01 |
| cg22512670 | 9.58   | 4.78  | 4.49E-02 | 6.73   | 7.13  | 3.45E-01 | 19.22  | 9.61   | 4.54E-02 | 3.79   | 13.08 | 7.72E-01 | 7.64   | 11.59 | 5.09E-01 |
| cg11690666 | 4.11   | 2.05  | 4.49E-02 | 3.01   | 2.63  | 2.53E-01 | 9.81   | 5.01   | 5.04E-02 | 3.12   | 5.49  | 5.70E-01 | 2.44   | 6.97  | 7.26E-01 |

|                |        |       |          |        |       |          |         |        |          |        |       |          |        |       |          |
|----------------|--------|-------|----------|--------|-------|----------|---------|--------|----------|--------|-------|----------|--------|-------|----------|
| cg04007350     | 4.93   | 2.46  | 4.49E-02 | 6.02   | 3.29  | 6.76E-02 | 8.38    | 5.41   | 1.21E-01 | 2.96   | 7.15  | 6.79E-01 | -4.29  | 7.15  | 5.49E-01 |
| cg01595262     | -11.59 | 5.78  | 4.49E-02 | -19.08 | 12.53 | 1.28E-01 | 13.53   | 19.43  | 4.86E-01 | -10.80 | 7.82  | 1.67E-01 | -18.49 | 14.77 | 2.10E-01 |
| cg13314167     | 5.48   | 2.73  | 4.49E-02 | 5.93   | 4.69  | 2.07E-01 | 11.02   | 6.65   | 9.75E-02 | 5.56   | 4.29  | 1.95E-01 | -7.45  | 9.29  | 4.23E-01 |
| cg17571207     | 7.54   | 3.76  | 4.49E-02 | 4.24   | 5.30  | 4.24E-01 | 9.54    | 9.25   | 3.02E-01 | 14.33  | 8.61  | 9.59E-02 | 7.82   | 10.06 | 4.37E-01 |
| cg00421735     | 11.07  | 5.52  | 4.49E-02 | 15.80  | 15.81 | 3.18E-01 | 24.48   | 14.80  | 9.82E-02 | 9.25   | 6.72  | 1.68E-01 | -8.08  | 21.95 | 7.13E-01 |
| cg01254264     | -10.77 | 5.37  | 4.49E-02 | -17.34 | 11.06 | 1.17E-01 | -2.75   | 13.57  | 8.39E-01 | -5.32  | 8.39  | 5.26E-01 | -20.63 | 12.10 | 8.82E-02 |
| cg16745104     | -7.78  | 3.88  | 4.49E-02 | -13.08 | 6.80  | 5.43E-02 | -8.69   | 10.31  | 3.99E-01 | -7.26  | 5.85  | 2.14E-01 | 9.89   | 12.80 | 4.39E-01 |
| cg16208271     | 42.33  | 21.11 | 4.49E-02 | 59.99  | 27.37 | 2.84E-02 | 38.03   | 67.54  | 5.73E-01 | 34.96  | 54.41 | 5.20E-01 | -15.03 | 53.36 | 7.78E-01 |
| cg20138458     | 24.67  | 12.30 | 4.49E-02 | 17.23  | 16.19 | 2.87E-01 | 47.90   | 39.30  | 2.23E-01 | 46.59  | 37.19 | 2.10E-01 | 22.92  | 26.54 | 3.88E-01 |
| cg00548268     | 10.54  | 5.26  | 4.50E-02 | 20.44  | 8.94  | 2.23E-02 | 10.81   | 13.49  | 4.23E-01 | 6.76   | 10.47 | 5.18E-01 | 0.53   | 10.51 | 9.60E-01 |
| cg04790755     | 16.16  | 8.06  | 4.50E-02 | 27.66  | 14.04 | 4.89E-02 | 12.30   | 15.44  | 4.26E-01 | -2.75  | 17.45 | 8.75E-01 | 23.18  | 18.75 | 2.16E-01 |
| cg17357797     | 21.27  | 10.61 | 4.50E-02 | 20.84  | 26.48 | 4.31E-01 | -100.65 | 86.26  | 2.43E-01 | 29.11  | 10.26 | 4.56E-03 | -1.43  | 26.04 | 9.56E-01 |
| cg19296258     | -19.39 | 9.67  | 4.50E-02 | -7.04  | 11.59 | 5.43E-01 | -22.57  | 25.93  | 3.84E-01 | -19.09 | 26.58 | 4.73E-01 | -49.15 | 20.17 | 1.48E-02 |
| cg25343734     | -18.54 | 9.25  | 4.50E-02 | -31.38 | 17.73 | 7.67E-02 | 7.84    | 22.96  | 7.33E-01 | -14.64 | 16.77 | 3.83E-01 | -26.10 | 18.09 | 1.49E-01 |
| cg02264238     | 15.14  | 7.55  | 4.50E-02 | 12.58  | 17.27 | 4.66E-01 | 16.21   | 22.05  | 4.62E-01 | 13.37  | 9.49  | 1.59E-01 | 40.80  | 31.40 | 1.94E-01 |
| cg26605164     | 5.83   | 2.91  | 4.50E-02 | 5.54   | 3.69  | 1.33E-01 | 13.91   | 6.96   | 4.58E-02 | 2.93   | 9.39  | 7.55E-01 | -2.77  | 8.72  | 7.51E-01 |
| cg21833751     | 19.86  | 9.91  | 4.50E-02 | 44.18  | 20.29 | 2.95E-02 | -20.79  | 35.94  | 5.63E-01 | 13.47  | 12.68 | 2.88E-01 | 28.72  | 28.32 | 3.11E-01 |
| cg12954267     | -6.79  | 3.39  | 4.50E-02 | -4.97  | 8.85  | 5.74E-01 | 12.48   | 18.71  | 5.05E-01 | -9.65  | 4.08  | 1.81E-02 | 1.27   | 9.30  | 8.91E-01 |
| cg02570977     | 37.16  | 18.53 | 4.50E-02 | -11.70 | 51.87 | 8.22E-01 | -94.62  | 204.30 | 6.43E-01 | 35.64  | 15.24 | 1.93E-02 | 115.73 | 56.11 | 3.92E-02 |
| cg17878972     | 10.23  | 5.10  | 4.50E-02 | 13.73  | 7.31  | 6.02E-02 | 5.83    | 12.51  | 6.41E-01 | 27.05  | 18.57 | 1.45E-01 | 1.94   | 9.79  | 8.43E-01 |
| cg15733792     | 16.03  | 7.99  | 4.50E-02 | 29.67  | 20.63 | 1.50E-01 | 13.60   | 29.06  | 6.40E-01 | 10.47  | 9.47  | 2.69E-01 | 50.49  | 32.39 | 1.19E-01 |
| cg17681750     | 10.42  | 5.20  | 4.50E-02 | 12.28  | 7.03  | 8.07E-02 | 22.63   | 11.52  | 4.94E-02 | 10.51  | 10.44 | 3.14E-01 | -7.51  | 12.01 | 5.31E-01 |
| cg11594811     | -7.20  | 3.59  | 4.50E-02 | -16.10 | 7.50  | 3.19E-02 | 4.77    | 13.29  | 7.20E-01 | -4.93  | 4.91  | 3.16E-01 | -7.49  | 8.87  | 3.99E-01 |
| ch.15.1454355R | -50.60 | 25.24 | 4.50E-02 | -49.85 | 33.04 | 1.31E-01 | -105.60 | 93.64  | 2.59E-01 | 27.69  | 72.03 | 7.01E-01 | -77.95 | 53.66 | 1.46E-01 |
| cg26330987     | 20.66  | 10.31 | 4.50E-02 | 16.44  | 13.34 | 2.18E-01 | 19.78   | 37.20  | 5.95E-01 | -14.21 | 34.65 | 6.82E-01 | 44.48  | 21.12 | 3.52E-02 |
| cg05941840     | -10.91 | 5.44  | 4.50E-02 | -17.20 | 11.49 | 1.34E-01 | -9.85   | 17.53  | 5.74E-01 | -8.22  | 7.75  | 2.89E-01 | -10.96 | 12.58 | 3.84E-01 |
| cg21399492     | -9.51  | 4.74  | 4.50E-02 | -18.77 | 12.13 | 1.22E-01 | 7.72    | 13.31  | 5.62E-01 | -9.36  | 6.00  | 1.19E-01 | -18.52 | 15.35 | 2.27E-01 |
| cg01649456     | -7.28  | 3.63  | 4.50E-02 | -6.69  | 7.72  | 3.86E-01 | -2.44   | 9.55   | 7.98E-01 | -8.30  | 5.07  | 1.01E-01 | -9.89  | 10.53 | 3.47E-01 |
| cg09719850     | 15.05  | 7.51  | 4.50E-02 | 16.35  | 16.01 | 3.07E-01 | 16.07   | 13.89  | 2.47E-01 | 11.96  | 12.95 | 3.56E-01 | 17.99  | 19.23 | 3.49E-01 |
| cg20304290     | -9.96  | 4.97  | 4.50E-02 | -10.00 | 7.22  | 1.66E-01 | 7.15    | 11.33  | 5.28E-01 | -20.77 | 12.00 | 8.36E-02 | -14.64 | 8.87  | 9.87E-02 |
| cg03576787     | 18.47  | 9.22  | 4.50E-02 | 35.72  | 27.31 | 1.91E-01 | 18.67   | 38.62  | 6.29E-01 | 17.97  | 11.13 | 1.06E-01 | 7.13   | 24.31 | 7.69E-01 |
| cg04507187     | 32.48  | 16.20 | 4.50E-02 | 32.96  | 22.68 | 1.46E-01 | 8.87    | 61.30  | 8.85E-01 | 71.97  | 48.86 | 1.41E-01 | 23.00  | 29.10 | 4.29E-01 |
| cg11021849     | -14.58 | 7.27  | 4.50E-02 | -19.17 | 11.06 | 8.30E-02 | 9.29    | 20.78  | 6.55E-01 | -6.14  | 17.44 | 7.25E-01 | -23.48 | 13.98 | 9.31E-02 |
| cg14091258     | 5.06   | 2.52  | 4.50E-02 | 4.77   | 3.52  | 1.76E-01 | 4.00    | 5.40   | 4.59E-01 | 20.56  | 10.22 | 4.43E-02 | 2.34   | 5.55  | 6.73E-01 |
| cg25124956     | -10.41 | 5.19  | 4.50E-02 | -6.57  | 9.13  | 4.72E-01 | -8.14   | 13.47  | 5.46E-01 | -10.80 | 8.12  | 1.84E-01 | -22.31 | 15.03 | 1.38E-01 |



|            |        |       |          |         |       |          |        |        |          |        |       |          |        |       |          |
|------------|--------|-------|----------|---------|-------|----------|--------|--------|----------|--------|-------|----------|--------|-------|----------|
| cg23384027 | 9.57   | 4.77  | 4.50E-02 | 4.98    | 6.32  | 4.31E-01 | 16.08  | 12.02  | 1.81E-01 | 11.00  | 14.25 | 4.40E-01 | 18.45  | 11.91 | 1.21E-01 |
| cg08731720 | 21.28  | 10.62 | 4.50E-02 | 23.53   | 11.11 | 3.42E-02 | 31.52  | 114.19 | 7.83E-01 | 34.02  | 67.38 | 6.14E-01 | -25.17 | 46.16 | 5.86E-01 |
| cg18717689 | -11.12 | 5.55  | 4.50E-02 | -17.09  | 8.86  | 5.36E-02 | 0.38   | 12.72  | 9.76E-01 | -9.12  | 13.99 | 5.14E-01 | -11.71 | 10.86 | 2.81E-01 |
| cg02556345 | -7.77  | 3.88  | 4.50E-02 | -7.09   | 5.03  | 1.59E-01 | -11.73 | 10.79  | 2.77E-01 | 0.21   | 18.65 | 9.91E-01 | -8.78  | 8.01  | 2.73E-01 |
| cg26591162 | 17.63  | 8.80  | 4.50E-02 | 34.14   | 11.45 | 2.86E-03 | 12.79  | 13.63  | 3.48E-01 | 17.60  | 19.14 | 3.58E-01 | -8.49  | 18.94 | 6.54E-01 |
| cg02345321 | -13.90 | 6.93  | 4.50E-02 | -13.33  | 11.84 | 2.60E-01 | -2.55  | 16.58  | 8.78E-01 | -17.27 | 12.48 | 1.66E-01 | -20.46 | 16.65 | 2.19E-01 |
| cg11231701 | 6.15   | 3.07  | 4.50E-02 | 3.75    | 3.36  | 2.64E-01 | 16.51  | 6.75   | 1.45E-02 | 8.56   | 8.02  | 2.86E-01 | 0.49   | 7.11  | 9.45E-01 |
| cg09349128 | -10.71 | 5.34  | 4.50E-02 | -13.10  | 8.12  | 1.07E-01 | 6.20   | 13.98  | 6.58E-01 | -7.62  | 10.68 | 4.76E-01 | -23.63 | 12.93 | 6.76E-02 |
| cg08975917 | -11.65 | 5.81  | 4.50E-02 | -19.99  | 8.58  | 1.98E-02 | -2.82  | 13.13  | 8.30E-01 | -7.37  | 17.33 | 6.71E-01 | -4.68  | 12.04 | 6.97E-01 |
| cg17996991 | -6.72  | 3.35  | 4.50E-02 | -4.83   | 6.81  | 4.78E-01 | -10.04 | 11.13  | 3.67E-01 | -5.03  | 4.55  | 2.69E-01 | -15.34 | 9.50  | 1.06E-01 |
| cg03736062 | -10.45 | 5.21  | 4.50E-02 | -22.36  | 11.08 | 4.37E-02 | -13.26 | 16.10  | 4.10E-01 | -5.54  | 7.28  | 4.47E-01 | -7.91  | 12.97 | 5.42E-01 |
| cg17534564 | 12.16  | 6.07  | 4.50E-02 | 17.52   | 15.96 | 2.72E-01 | 3.51   | 23.83  | 8.83E-01 | 11.33  | 7.16  | 1.14E-01 | 17.53  | 22.63 | 4.38E-01 |
| cg21869046 | 5.49   | 2.74  | 4.50E-02 | 9.18    | 3.88  | 1.79E-02 | 4.52   | 5.88   | 4.43E-01 | -2.37  | 8.60  | 7.83E-01 | 0.91   | 6.43  | 8.87E-01 |
| cg26076793 | -8.57  | 4.28  | 4.50E-02 | 0.21    | 8.96  | 9.81E-01 | -21.70 | 21.15  | 3.05E-01 | -7.31  | 5.87  | 2.13E-01 | -19.26 | 9.57  | 4.41E-02 |
| cg06625721 | 18.27  | 9.12  | 4.50E-02 | 17.60   | 16.52 | 2.87E-01 | 9.03   | 19.66  | 6.46E-01 | 16.96  | 15.72 | 2.81E-01 | 36.52  | 24.00 | 1.28E-01 |
| cg21798669 | 15.24  | 7.61  | 4.50E-02 | 33.51   | 21.84 | 1.25E-01 | 25.48  | 24.42  | 2.97E-01 | 14.71  | 9.09  | 1.06E-01 | -19.29 | 26.54 | 4.67E-01 |
| cg00548467 | 14.88  | 7.43  | 4.50E-02 | 28.48   | 15.72 | 7.00E-02 | 13.54  | 19.25  | 4.82E-01 | 7.95   | 10.49 | 4.48E-01 | 19.90  | 20.85 | 3.40E-01 |
| cg13995006 | -11.01 | 5.49  | 4.50E-02 | -7.91   | 7.49  | 2.91E-01 | -24.73 | 13.81  | 7.33E-02 | -25.34 | 22.06 | 2.51E-01 | -5.27  | 11.15 | 6.37E-01 |
| cg17150898 | -7.73  | 3.86  | 4.50E-02 | -9.46   | 5.03  | 5.97E-02 | 3.08   | 9.05   | 7.33E-01 | -20.37 | 11.23 | 6.96E-02 | -2.81  | 11.61 | 8.09E-01 |
| cg15891358 | -11.03 | 5.50  | 4.50E-02 | -23.39  | 12.82 | 6.82E-02 | -11.09 | 25.97  | 6.69E-01 | -6.77  | 6.81  | 3.21E-01 | -15.33 | 16.03 | 3.39E-01 |
| cg23457316 | 44.14  | 22.02 | 4.51E-02 | 53.34   | 32.91 | 1.05E-01 | 159.43 | 114.99 | 1.66E-01 | 58.02  | 64.71 | 3.70E-01 | 19.23  | 34.84 | 5.81E-01 |
| cg10570177 | 12.79  | 6.38  | 4.51E-02 | 19.12   | 9.62  | 4.68E-02 | -7.33  | 15.63  | 6.39E-01 | 22.87  | 22.62 | 3.12E-01 | 12.03  | 11.39 | 2.91E-01 |
| cg17951244 | -10.22 | 5.10  | 4.51E-02 | -4.01   | 11.27 | 7.22E-01 | 7.78   | 15.81  | 6.23E-01 | -14.62 | 6.63  | 2.75E-02 | -15.68 | 16.15 | 3.32E-01 |
| cg00420722 | 26.67  | 13.31 | 4.51E-02 | 15.35   | 17.85 | 3.90E-01 | 37.89  | 42.36  | 3.71E-01 | 96.94  | 45.44 | 3.29E-02 | 23.42  | 26.10 | 3.70E-01 |
| cg25069770 | 10.20  | 5.09  | 4.51E-02 | 1.22    | 10.10 | 9.04E-01 | 5.33   | 13.98  | 7.03E-01 | 14.68  | 7.29  | 4.40E-02 | 16.11  | 14.35 | 2.62E-01 |
| cg16463229 | 5.38   | 2.69  | 4.51E-02 | 4.29    | 3.49  | 2.19E-01 | 5.25   | 6.50   | 4.20E-01 | 8.58   | 8.84  | 3.32E-01 | 8.05   | 7.11  | 2.58E-01 |
| cg21484985 | -2.51  | 1.25  | 4.51E-02 | -2.52   | 1.75  | 1.51E-01 | -2.63  | 2.43   | 2.78E-01 | -2.81  | 5.32  | 5.97E-01 | -2.18  | 3.05  | 4.74E-01 |
| cg21840875 | 14.47  | 7.22  | 4.51E-02 | 19.84   | 11.07 | 7.30E-02 | 17.70  | 14.80  | 2.32E-01 | 4.32   | 20.00 | 8.29E-01 | 6.07   | 15.92 | 7.03E-01 |
| cg22636429 | 27.50  | 13.72 | 4.51E-02 | 19.96   | 19.00 | 2.94E-01 | -11.70 | 76.22  | 8.78E-01 | 102.69 | 68.05 | 1.31E-01 | 32.81  | 21.56 | 1.28E-01 |
| cg00660765 | -14.58 | 7.28  | 4.51E-02 | 7.57    | 17.49 | 6.65E-01 | -12.61 | 30.40  | 6.78E-01 | -22.27 | 8.75  | 1.09E-02 | 2.81   | 25.97 | 9.14E-01 |
| cg27373627 | -55.31 | 27.60 | 4.51E-02 | -117.40 | 47.04 | 1.26E-02 | -75.80 | 179.34 | 6.73E-01 | -21.31 | 14.65 | 1.46E-01 | -79.99 | 54.46 | 1.42E-01 |
| cg11051158 | -10.73 | 5.35  | 4.51E-02 | -16.44  | 7.46  | 2.74E-02 | 4.26   | 11.78  | 7.18E-01 | 0.38   | 21.57 | 9.86E-01 | -14.58 | 11.51 | 2.05E-01 |
| cg16226785 | -13.44 | 6.70  | 4.51E-02 | -0.29   | 17.13 | 9.86E-01 | -7.09  | 32.36  | 8.27E-01 | -16.95 | 7.92  | 3.24E-02 | -10.83 | 22.65 | 6.32E-01 |
| cg16480145 | 24.98  | 12.46 | 4.51E-02 | 32.13   | 16.82 | 5.60E-02 | 2.80   | 40.15  | 9.44E-01 | -25.73 | 44.26 | 5.61E-01 | 33.08  | 23.77 | 1.64E-01 |
| cg16489447 | 10.29  | 5.14  | 4.51E-02 | 10.87   | 12.32 | 3.78E-01 | 42.54  | 34.80  | 2.22E-01 | 7.16   | 6.25  | 2.52E-01 | 20.42  | 14.28 | 1.53E-01 |

|            |        |       |          |        |       |          |         |        |          |        |       |          |        |       |          |
|------------|--------|-------|----------|--------|-------|----------|---------|--------|----------|--------|-------|----------|--------|-------|----------|
| cg10678486 | 24.89  | 12.42 | 4.51E-02 | 24.11  | 16.42 | 1.42E-01 | -13.63  | 52.50  | 7.95E-01 | 43.48  | 26.39 | 9.94E-02 | 14.80  | 32.06 | 6.44E-01 |
| cg14008999 | 5.81   | 2.90  | 4.51E-02 | 6.69   | 4.40  | 1.28E-01 | 1.17    | 6.00   | 8.45E-01 | 7.73   | 8.48  | 3.62E-01 | 8.05   | 6.27  | 1.99E-01 |
| cg07806328 | 7.65   | 3.82  | 4.51E-02 | 10.44  | 5.17  | 4.35E-02 | 9.66    | 9.22   | 2.95E-01 | 1.42   | 9.87  | 8.85E-01 | 0.68   | 10.42 | 9.48E-01 |
| cg19450840 | 7.95   | 3.97  | 4.51E-02 | 10.05  | 6.00  | 9.39E-02 | 0.28    | 10.15  | 9.78E-01 | 9.50   | 8.24  | 2.49E-01 | 7.35   | 9.41  | 4.35E-01 |
| cg11837181 | -10.04 | 5.01  | 4.51E-02 | -18.35 | 7.50  | 1.45E-02 | -12.06  | 13.06  | 3.56E-01 | 2.92   | 12.23 | 8.11E-01 | -2.40  | 10.24 | 8.15E-01 |
| cg17962527 | 11.89  | 5.94  | 4.51E-02 | 6.61   | 9.11  | 4.68E-01 | 14.97   | 10.18  | 1.41E-01 | 1.32   | 20.80 | 9.49E-01 | 25.30  | 15.15 | 9.48E-02 |
| cg12597472 | -13.79 | 6.88  | 4.51E-02 | -29.75 | 16.95 | 7.92E-02 | -28.05  | 24.17  | 2.46E-01 | -5.47  | 7.41  | 4.60E-01 | -31.76 | 20.86 | 1.28E-01 |
| cg26185071 | -12.46 | 6.22  | 4.51E-02 | -23.39 | 19.34 | 2.27E-01 | -6.44   | 34.72  | 8.53E-01 | -10.72 | 6.96  | 1.24E-01 | -19.23 | 24.06 | 4.24E-01 |
| cg19517238 | 17.80  | 8.89  | 4.51E-02 | 33.84  | 14.27 | 1.77E-02 | 10.79   | 22.80  | 6.36E-01 | 19.63  | 21.73 | 3.67E-01 | -0.82  | 16.41 | 9.60E-01 |
| cg03782381 | 24.89  | 12.42 | 4.51E-02 | 7.13   | 16.36 | 6.63E-01 | 32.24   | 17.69  | 6.84E-02 | 6.43   | 18.22 | 7.24E-01 | 64.18  | 22.38 | 4.14E-03 |
| cg19455642 | -15.85 | 7.91  | 4.51E-02 | -18.46 | 13.24 | 1.63E-01 | 1.24    | 16.26  | 9.39E-01 | -17.42 | 16.31 | 2.85E-01 | -31.83 | 19.11 | 9.57E-02 |
| cg01969837 | 9.95   | 4.97  | 4.51E-02 | 6.00   | 12.51 | 6.32E-01 | 5.31    | 25.45  | 8.35E-01 | 10.37  | 5.87  | 7.74E-02 | 15.59  | 16.67 | 3.50E-01 |
| cg00425177 | 13.73  | 6.85  | 4.51E-02 | 1.99   | 18.36 | 9.14E-01 | 53.47   | 33.88  | 1.14E-01 | 12.11  | 8.00  | 1.30E-01 | 27.67  | 23.37 | 2.36E-01 |
| cg23517363 | 13.93  | 6.95  | 4.51E-02 | 22.49  | 19.85 | 2.57E-01 | -6.02   | 25.33  | 8.12E-01 | 17.22  | 8.06  | 3.26E-02 | -20.39 | 28.81 | 4.79E-01 |
| cg07895132 | 6.81   | 3.40  | 4.51E-02 | 4.35   | 4.66  | 3.50E-01 | 13.61   | 6.37   | 3.27E-02 | -1.73  | 13.09 | 8.95E-01 | 6.42   | 10.04 | 5.23E-01 |
| cg17843418 | -24.05 | 12.01 | 4.51E-02 | -32.84 | 19.31 | 8.90E-02 | 26.77   | 34.21  | 4.34E-01 | -44.92 | 24.67 | 6.86E-02 | -18.56 | 20.84 | 3.73E-01 |
| cg00364287 | 12.91  | 6.45  | 4.51E-02 | 9.95   | 11.70 | 3.95E-01 | 26.85   | 22.69  | 2.37E-01 | 7.77   | 10.89 | 4.75E-01 | 18.84  | 12.51 | 1.32E-01 |
| cg07085177 | 19.54  | 9.75  | 4.51E-02 | 25.03  | 17.69 | 1.57E-01 | 2.26    | 18.92  | 9.05E-01 | 12.51  | 13.40 | 3.50E-01 | 59.01  | 25.53 | 2.08E-02 |
| cg15379185 | 20.95  | 10.45 | 4.51E-02 | 27.99  | 16.90 | 9.76E-02 | 45.80   | 35.85  | 2.01E-01 | 1.65   | 17.50 | 9.25E-01 | 32.76  | 24.97 | 1.89E-01 |
| cg08938402 | 32.14  | 16.04 | 4.51E-02 | 31.26  | 48.40 | 5.18E-01 | -310.54 | 261.78 | 2.36E-01 | 31.74  | 17.80 | 7.45E-02 | 55.10  | 58.93 | 3.50E-01 |
| cg17162576 | 18.90  | 9.44  | 4.51E-02 | 18.57  | 13.48 | 1.68E-01 | 11.46   | 30.67  | 7.09E-01 | 38.43  | 23.28 | 9.88E-02 | 9.58   | 18.83 | 6.11E-01 |
| cg22849953 | 16.34  | 8.16  | 4.52E-02 | 8.20   | 16.82 | 6.26E-01 | 27.03   | 20.35  | 1.84E-01 | 16.79  | 11.42 | 1.41E-01 | 15.98  | 26.63 | 5.48E-01 |
| cg12509712 | 5.20   | 2.60  | 4.52E-02 | 7.70   | 4.21  | 6.73E-02 | 0.34    | 5.95   | 9.54E-01 | 2.26   | 3.42  | 5.09E-01 | 14.44  | 6.68  | 3.06E-02 |
| cg15765889 | -16.43 | 8.20  | 4.52E-02 | -13.31 | 21.67 | 5.39E-01 | -39.99  | 39.94  | 3.17E-01 | -17.65 | 9.48  | 6.26E-02 | 5.64   | 31.87 | 8.59E-01 |
| cg08060718 | -31.37 | 15.66 | 4.52E-02 | -11.98 | 23.77 | 6.14E-01 | -21.02  | 50.64  | 6.78E-01 | -66.03 | 32.16 | 4.00E-02 | -36.46 | 32.43 | 2.61E-01 |
| cg08462122 | -7.23  | 3.61  | 4.52E-02 | -5.75  | 5.17  | 2.66E-01 | -4.57   | 7.49   | 5.42E-01 | -9.94  | 11.31 | 3.79E-01 | -13.10 | 8.51  | 1.24E-01 |
| cg01311181 | -13.06 | 6.52  | 4.52E-02 | -23.64 | 19.86 | 2.34E-01 | -7.70   | 72.64  | 9.16E-01 | -9.15  | 7.22  | 2.05E-01 | -43.67 | 24.93 | 7.98E-02 |
| cg21773967 | 17.59  | 8.78  | 4.52E-02 | 60.59  | 28.84 | 3.57E-02 | 35.21   | 98.81  | 7.22E-01 | 13.81  | 9.70  | 1.55E-01 | 4.78   | 30.99 | 8.77E-01 |
| cg04760559 | 13.11  | 6.54  | 4.52E-02 | 19.99  | 15.94 | 2.10E-01 | 25.14   | 16.22  | 1.21E-01 | 6.06   | 8.60  | 4.81E-01 | 23.82  | 21.86 | 2.76E-01 |
| cg05942459 | 11.56  | 5.77  | 4.52E-02 | 17.94  | 11.60 | 1.22E-01 | 21.98   | 18.77  | 2.42E-01 | 10.66  | 8.67  | 2.19E-01 | 1.50   | 12.42 | 9.04E-01 |
| cg23699041 | -23.36 | 11.66 | 4.52E-02 | -29.53 | 14.92 | 4.78E-02 | 11.10   | 34.52  | 7.48E-01 | -39.11 | 56.01 | 4.85E-01 | -21.11 | 24.21 | 3.83E-01 |
| cg04869838 | -7.70  | 3.84  | 4.52E-02 | -13.97 | 4.41  | 1.54E-03 | -6.04   | 8.00   | 4.50E-01 | -7.48  | 9.18  | 4.15E-01 | 1.95   | 6.79  | 7.74E-01 |
| cg10040015 | 17.48  | 8.72  | 4.52E-02 | 25.15  | 16.25 | 1.22E-01 | 19.84   | 15.87  | 2.11E-01 | 17.61  | 17.12 | 3.04E-01 | -2.35  | 22.56 | 9.17E-01 |
| cg23686556 | -7.06  | 3.52  | 4.52E-02 | -6.47  | 4.99  | 1.95E-01 | -6.67   | 8.16   | 4.13E-01 | 6.52   | 12.96 | 6.15E-01 | -12.77 | 7.19  | 7.59E-02 |
| cg15861102 | 14.68  | 7.33  | 4.52E-02 | 7.93   | 16.56 | 6.32E-01 | 2.76    | 28.66  | 9.23E-01 | 22.12  | 9.11  | 1.52E-02 | -14.91 | 24.24 | 5.38E-01 |

|            |        |       |          |        |       |          |        |        |          |        |       |          |        |       |          |
|------------|--------|-------|----------|--------|-------|----------|--------|--------|----------|--------|-------|----------|--------|-------|----------|
| cg05349159 | -14.87 | 7.42  | 4.52E-02 | -20.41 | 12.59 | 1.05E-01 | -8.63  | 15.32  | 5.73E-01 | -4.23  | 16.25 | 7.95E-01 | -23.30 | 16.26 | 1.52E-01 |
| cg12759215 | -19.57 | 9.77  | 4.52E-02 | -16.57 | 13.01 | 2.03E-01 | -7.04  | 37.70  | 8.52E-01 | -26.72 | 37.32 | 4.74E-01 | -26.39 | 17.84 | 1.39E-01 |
| cg18115656 | 13.36  | 6.67  | 4.52E-02 | 9.18   | 8.79  | 2.96E-01 | 14.01  | 15.12  | 3.54E-01 | 52.27  | 23.20 | 2.43E-02 | 8.31   | 13.42 | 5.36E-01 |
| cg23036678 | -9.18  | 4.58  | 4.52E-02 | -13.35 | 10.36 | 1.97E-01 | 5.98   | 20.35  | 7.69E-01 | -9.07  | 5.50  | 9.90E-02 | -9.66  | 18.96 | 6.11E-01 |
| cg17777874 | -22.56 | 11.26 | 4.52E-02 | -30.30 | 19.97 | 1.29E-01 | 1.25   | 42.41  | 9.77E-01 | -28.93 | 16.56 | 8.06E-02 | 2.50   | 29.19 | 9.32E-01 |
| cg13810562 | 15.96  | 7.97  | 4.52E-02 | 19.16  | 11.29 | 8.95E-02 | -10.99 | 20.60  | 5.94E-01 | 43.99  | 25.46 | 8.41E-02 | 14.78  | 15.63 | 3.44E-01 |
| cg13825876 | 31.78  | 15.87 | 4.52E-02 | 39.19  | 20.44 | 5.52E-02 | 52.38  | 97.73  | 5.92E-01 | 47.49  | 63.05 | 4.51E-01 | 12.27  | 28.61 | 6.68E-01 |
| cg21644914 | -12.02 | 6.00  | 4.52E-02 | -19.94 | 11.34 | 7.88E-02 | -3.74  | 14.96  | 8.03E-01 | -12.66 | 9.64  | 1.89E-01 | -5.43  | 14.48 | 7.08E-01 |
| cg05374956 | 6.73   | 3.36  | 4.52E-02 | 5.51   | 4.58  | 2.29E-01 | 13.86  | 7.37   | 5.99E-02 | -1.38  | 10.15 | 8.92E-01 | 7.17   | 8.85  | 4.18E-01 |
| cg24451653 | 19.99  | 9.98  | 4.52E-02 | 32.28  | 16.75 | 5.39E-02 | 18.69  | 20.16  | 3.54E-01 | 26.88  | 20.95 | 2.00E-01 | -12.46 | 24.00 | 6.04E-01 |
| cg19660618 | -35.65 | 17.80 | 4.52E-02 | -18.40 | 23.19 | 4.28E-01 | -93.20 | 48.58  | 5.50E-02 | -18.11 | 54.67 | 7.40E-01 | -60.91 | 43.14 | 1.58E-01 |
| cg12213111 | -10.35 | 5.17  | 4.52E-02 | -12.67 | 8.07  | 1.16E-01 | 1.55   | 15.35  | 9.20E-01 | -7.03  | 11.30 | 5.34E-01 | -14.45 | 10.01 | 1.49E-01 |
| cg25581826 | 54.62  | 27.28 | 4.52E-02 | 90.14  | 42.48 | 3.38E-02 | 259.12 | 148.06 | 8.01E-02 | 21.41  | 13.71 | 1.18E-01 | 64.11  | 48.40 | 1.85E-01 |
| cg05494465 | -19.85 | 9.91  | 4.52E-02 | -0.29  | 17.29 | 9.87E-01 | -25.21 | 31.54  | 4.24E-01 | -40.03 | 16.13 | 1.31E-02 | -11.46 | 21.99 | 6.02E-01 |
| cg25133951 | -6.75  | 3.37  | 4.52E-02 | -7.34  | 4.43  | 9.76E-02 | -12.51 | 9.30   | 1.78E-01 | 3.35   | 9.64  | 7.29E-01 | -7.56  | 8.24  | 3.59E-01 |
| cg22082350 | -11.71 | 5.85  | 4.52E-02 | -14.41 | 9.26  | 1.20E-01 | -0.74  | 13.76  | 9.57E-01 | -8.75  | 15.56 | 5.74E-01 | -16.47 | 11.08 | 1.37E-01 |
| cg03784956 | -4.42  | 2.21  | 4.52E-02 | -4.41  | 3.50  | 2.09E-01 | -9.62  | 7.02   | 1.70E-01 | -4.46  | 3.65  | 2.22E-01 | -0.65  | 5.92  | 9.13E-01 |
| cg08610415 | 11.88  | 5.93  | 4.52E-02 | 10.29  | 6.47  | 1.12E-01 | -22.93 | 55.30  | 6.78E-01 | 61.09  | 69.05 | 3.76E-01 | 21.75  | 15.89 | 1.71E-01 |
| cg27613852 | -30.91 | 15.43 | 4.52E-02 | -28.04 | 17.96 | 1.18E-01 | 4.08   | 113.29 | 9.71E-01 | -7.92  | 64.36 | 9.02E-01 | -52.97 | 35.86 | 1.40E-01 |
| cg02702692 | 15.72  | 7.85  | 4.52E-02 | 25.30  | 12.06 | 3.59E-02 | 4.18   | 15.29  | 7.85E-01 | -2.03  | 19.32 | 9.16E-01 | 28.78  | 20.48 | 1.60E-01 |
| cg03585280 | 14.20  | 7.09  | 4.52E-02 | 30.43  | 16.86 | 7.10E-02 | 48.46  | 44.34  | 2.74E-01 | 9.25   | 8.27  | 2.63E-01 | 12.34  | 28.24 | 6.62E-01 |
| cg02353448 | 16.62  | 8.30  | 4.52E-02 | 13.66  | 17.31 | 4.30E-01 | -49.01 | 47.93  | 3.07E-01 | 23.16  | 10.45 | 2.66E-02 | 3.07   | 25.08 | 9.03E-01 |
| cg00704369 | -5.47  | 2.73  | 4.52E-02 | -5.72  | 5.49  | 2.98E-01 | -7.24  | 8.98   | 4.20E-01 | -3.47  | 3.84  | 3.66E-01 | -10.63 | 6.98  | 1.28E-01 |
| cg04297410 | -22.33 | 11.15 | 4.52E-02 | -38.94 | 12.78 | 2.31E-03 | -49.78 | 30.50  | 1.03E-01 | -6.65  | 15.34 | 6.65E-01 | -1.15  | 20.41 | 9.55E-01 |
| cg11824827 | -7.02  | 3.51  | 4.52E-02 | -5.86  | 4.43  | 1.85E-01 | -7.41  | 8.26   | 3.70E-01 | 3.10   | 12.64 | 8.06E-01 | -19.50 | 10.33 | 5.91E-02 |
| cg01557792 | 8.14   | 4.06  | 4.52E-02 | 10.09  | 5.70  | 7.66E-02 | 15.70  | 10.84  | 1.48E-01 | 7.20   | 12.48 | 5.64E-01 | 0.15   | 8.21  | 9.86E-01 |
| cg17107572 | 36.49  | 18.22 | 4.53E-02 | 60.33  | 19.57 | 2.05E-03 | -39.22 | 50.05  | 4.33E-01 | 52.92  | 41.28 | 2.00E-01 | 21.14  | 28.16 | 4.53E-01 |
| cg03521348 | -9.64  | 4.82  | 4.53E-02 | -12.92 | 9.37  | 1.68E-01 | 1.72   | 11.46  | 8.81E-01 | -14.99 | 7.37  | 4.21E-02 | -1.05  | 13.21 | 9.37E-01 |
| cg11854981 | 6.41   | 3.20  | 4.53E-02 | 6.26   | 4.16  | 1.32E-01 | 13.28  | 8.35   | 1.12E-01 | 10.03  | 9.62  | 2.97E-01 | -2.39  | 8.27  | 7.73E-01 |
| cg12467090 | 13.55  | 6.77  | 4.53E-02 | 13.21  | 12.54 | 2.92E-01 | 18.55  | 13.85  | 1.80E-01 | 3.76   | 11.47 | 7.43E-01 | 32.48  | 19.37 | 9.36E-02 |
| cg02069721 | -10.95 | 5.47  | 4.53E-02 | -12.72 | 9.43  | 1.77E-01 | -5.20  | 11.56  | 6.53E-01 | -17.49 | 11.62 | 1.32E-01 | -7.49  | 11.71 | 5.22E-01 |
| cg15565231 | 15.68  | 7.83  | 4.53E-02 | -9.62  | 19.05 | 6.13E-01 | 16.47  | 33.09  | 6.19E-01 | 21.02  | 9.40  | 2.53E-02 | 22.26  | 27.67 | 4.21E-01 |
| cg01175610 | -5.76  | 2.88  | 4.53E-02 | -4.80  | 4.91  | 3.28E-01 | -5.51  | 8.74   | 5.28E-01 | -6.97  | 4.90  | 1.55E-01 | -5.49  | 6.40  | 3.91E-01 |
| cg04992666 | 23.69  | 11.83 | 4.53E-02 | 48.31  | 18.95 | 1.08E-02 | -2.24  | 23.19  | 9.23E-01 | 10.24  | 18.30 | 5.76E-01 | 37.57  | 25.86 | 1.46E-01 |
| cg19992629 | -8.61  | 4.30  | 4.53E-02 | -8.47  | 8.07  | 2.94E-01 | -12.66 | 15.50  | 4.14E-01 | -7.53  | 5.87  | 2.00E-01 | -11.53 | 13.35 | 3.88E-01 |

|            |        |       |          |        |       |          |         |        |          |        |       |          |         |       |          |
|------------|--------|-------|----------|--------|-------|----------|---------|--------|----------|--------|-------|----------|---------|-------|----------|
| cg13912673 | 13.74  | 6.86  | 4.53E-02 | 9.85   | 18.06 | 5.86E-01 | 28.64   | 25.75  | 2.66E-01 | 12.18  | 8.77  | 1.65E-01 | 16.43   | 16.54 | 3.21E-01 |
| cg23093450 | -16.27 | 8.13  | 4.53E-02 | -21.59 | 11.13 | 5.25E-02 | -12.69  | 19.83  | 5.22E-01 | -41.96 | 36.92 | 2.56E-01 | -2.42   | 16.21 | 8.81E-01 |
| cg09450828 | 28.10  | 14.04 | 4.53E-02 | 30.82  | 16.68 | 6.47E-02 | 55.36   | 63.29  | 3.82E-01 | 1.03   | 43.04 | 9.81E-01 | 25.29   | 38.00 | 5.06E-01 |
| cg03419136 | -6.62  | 3.30  | 4.53E-02 | -3.17  | 5.89  | 5.90E-01 | -14.24  | 9.25   | 1.24E-01 | -7.34  | 5.08  | 1.49E-01 | -5.18   | 9.02  | 5.65E-01 |
| cg01657186 | -37.00 | 18.48 | 4.53E-02 | -22.83 | 18.83 | 2.25E-01 | 41.39   | 49.67  | 4.05E-01 | -80.12 | 41.95 | 5.61E-02 | -58.04  | 19.01 | 2.27E-03 |
| cg20659169 | -50.50 | 25.23 | 4.53E-02 | -32.00 | 67.66 | 6.36E-01 | -406.58 | 328.76 | 2.16E-01 | -53.08 | 29.17 | 6.88E-02 | -36.97  | 76.98 | 6.31E-01 |
| cg01265660 | -20.47 | 10.23 | 4.53E-02 | -21.73 | 21.84 | 3.20E-01 | -59.34  | 56.00  | 2.89E-01 | -14.44 | 12.67 | 2.54E-01 | -45.16  | 33.07 | 1.72E-01 |
| cg26924294 | 46.77  | 23.36 | 4.53E-02 | 19.82  | 24.30 | 4.15E-01 | 15.65   | 126.43 | 9.01E-01 | 133.80 | 79.40 | 9.20E-02 | 86.82   | 42.20 | 3.97E-02 |
| cg17631779 | -14.15 | 7.07  | 4.53E-02 | -1.18  | 18.70 | 9.49E-01 | -21.00  | 42.84  | 6.24E-01 | -15.42 | 8.23  | 6.10E-02 | -22.11  | 23.32 | 3.43E-01 |
| cg11313355 | 11.24  | 5.61  | 4.53E-02 | 6.16   | 14.77 | 6.77E-01 | 4.94    | 23.13  | 8.31E-01 | 14.08  | 6.60  | 3.28E-02 | -1.79   | 20.70 | 9.31E-01 |
| cg05450995 | -32.51 | 16.24 | 4.53E-02 | 5.07   | 50.59 | 9.20E-01 | -108.82 | 190.78 | 5.68E-01 | -27.23 | 18.26 | 1.36E-01 | -108.14 | 51.60 | 3.61E-02 |
| cg00502444 | -7.96  | 3.98  | 4.53E-02 | -11.77 | 5.70  | 3.91E-02 | 2.62    | 8.56   | 7.60E-01 | -10.26 | 11.94 | 3.90E-01 | -8.91   | 9.19  | 3.32E-01 |
| cg14883106 | 24.25  | 12.11 | 4.53E-02 | 44.53  | 21.16 | 3.54E-02 | 24.74   | 29.36  | 3.99E-01 | 7.15   | 7.53  | 3.43E-01 | 50.96   | 26.74 | 5.66E-02 |
| cg17186103 | -9.91  | 4.95  | 4.53E-02 | -22.48 | 8.07  | 5.33E-03 | 0.94    | 18.09  | 9.59E-01 | -4.54  | 5.78  | 4.33E-01 | -7.71   | 11.00 | 4.83E-01 |
| cg17616099 | -15.77 | 7.88  | 4.53E-02 | -25.05 | 12.98 | 5.35E-02 | -9.65   | 17.61  | 5.84E-01 | -13.38 | 16.02 | 4.03E-01 | -7.23   | 18.13 | 6.90E-01 |
| cg11398523 | 28.29  | 14.13 | 4.53E-02 | 29.38  | 35.24 | 4.05E-01 | 7.72    | 148.16 | 9.58E-01 | 19.46  | 16.41 | 2.36E-01 | 102.46  | 47.53 | 3.11E-02 |
| cg13682140 | 12.01  | 6.00  | 4.53E-02 | 11.15  | 7.31  | 1.27E-01 | -3.67   | 19.43  | 8.50E-01 | 46.91  | 40.45 | 2.46E-01 | 18.21   | 13.08 | 1.64E-01 |
| cg26503701 | 19.06  | 9.52  | 4.53E-02 | 27.37  | 17.54 | 1.19E-01 | 10.42   | 20.47  | 6.11E-01 | 18.57  | 17.78 | 2.96E-01 | 16.87   | 21.18 | 4.26E-01 |
| cg18360347 | -7.11  | 3.55  | 4.53E-02 | -5.94  | 5.03  | 2.38E-01 | -13.13  | 7.44   | 7.76E-02 | 1.63   | 13.26 | 9.02E-01 | -6.32   | 7.92  | 4.25E-01 |
| cg25104105 | 14.66  | 7.32  | 4.53E-02 | 10.59  | 20.61 | 6.07E-01 | 5.82    | 25.24  | 8.18E-01 | 19.09  | 9.56  | 4.58E-02 | 8.02    | 16.26 | 6.22E-01 |
| cg08801710 | 9.92   | 4.96  | 4.53E-02 | 2.81   | 10.85 | 7.95E-01 | 13.89   | 16.13  | 3.89E-01 | 10.84  | 6.49  | 9.46E-02 | 15.01   | 14.77 | 3.10E-01 |
| cg26115667 | -6.97  | 3.48  | 4.53E-02 | -9.21  | 6.63  | 1.65E-01 | -6.52   | 8.25   | 4.29E-01 | -5.58  | 5.40  | 3.02E-01 | -7.24   | 9.60  | 4.51E-01 |
| cg15521790 | 11.82  | 5.90  | 4.53E-02 | 6.60   | 6.18  | 2.86E-01 | 28.58   | 9.00   | 1.49E-03 | 2.39   | 14.22 | 8.67E-01 | 6.88    | 10.29 | 5.04E-01 |
| cg20784295 | -9.04  | 4.52  | 4.53E-02 | -16.37 | 9.24  | 7.66E-02 | 3.12    | 15.91  | 8.44E-01 | -9.20  | 6.06  | 1.29E-01 | -2.14   | 12.83 | 8.68E-01 |
| cg26816023 | 16.55  | 8.27  | 4.53E-02 | 23.62  | 19.57 | 2.28E-01 | 18.45   | 20.79  | 3.75E-01 | 15.49  | 10.82 | 1.52E-01 | 4.67    | 29.41 | 8.74E-01 |
| cg07575896 | -8.11  | 4.05  | 4.53E-02 | -23.17 | 9.81  | 1.82E-02 | -8.44   | 22.90  | 7.13E-01 | -5.18  | 4.97  | 2.97E-01 | -3.34   | 11.12 | 7.64E-01 |
| cg03275375 | -9.16  | 4.57  | 4.54E-02 | -3.09  | 6.75  | 6.47E-01 | -16.76  | 10.54  | 1.12E-01 | -14.50 | 11.45 | 2.05E-01 | -11.73  | 10.42 | 2.60E-01 |
| cg23640615 | -20.94 | 10.46 | 4.54E-02 | -30.72 | 23.54 | 1.92E-01 | 8.99    | 52.80  | 8.65E-01 | -26.61 | 12.84 | 3.82E-02 | 24.57   | 33.21 | 4.59E-01 |
| cg20262738 | 16.37  | 8.18  | 4.54E-02 | 26.89  | 19.33 | 1.64E-01 | 71.26   | 53.29  | 1.81E-01 | 15.11  | 9.58  | 1.15E-01 | -16.30  | 31.11 | 6.00E-01 |
| cg12032648 | -15.89 | 7.94  | 4.54E-02 | -24.80 | 18.14 | 1.72E-01 | -15.10  | 33.32  | 6.51E-01 | -9.17  | 11.63 | 4.30E-01 | -21.02  | 14.85 | 1.57E-01 |
| cg17419175 | 9.97   | 4.98  | 4.54E-02 | -9.02  | 14.51 | 5.34E-01 | -4.09   | 23.93  | 8.64E-01 | 12.64  | 5.61  | 2.43E-02 | 24.62   | 22.10 | 2.65E-01 |
| cg11078875 | -11.94 | 5.97  | 4.54E-02 | -18.87 | 7.74  | 1.48E-02 | 7.96    | 11.79  | 5.00E-01 | -17.95 | 11.79 | 1.28E-01 | -13.03  | 11.77 | 2.69E-01 |
| cg21956337 | -12.06 | 6.03  | 4.54E-02 | 5.08   | 19.25 | 7.92E-01 | 67.79   | 99.85  | 4.97E-01 | -15.71 | 6.62  | 1.76E-02 | 3.33    | 22.97 | 8.85E-01 |
| cg05585303 | 12.94  | 6.47  | 4.54E-02 | 18.53  | 9.52  | 5.16E-02 | 13.23   | 17.92  | 4.60E-01 | 24.82  | 19.08 | 1.93E-01 | -0.64   | 11.94 | 9.57E-01 |
| cg24359109 | -16.37 | 8.18  | 4.54E-02 | -20.57 | 14.57 | 1.58E-01 | -13.17  | 16.58  | 4.27E-01 | -22.51 | 15.63 | 1.50E-01 | -3.07   | 19.97 | 8.78E-01 |

|               |        |       |          |        |       |          |         |        |          |        |       |          |        |       |          |
|---------------|--------|-------|----------|--------|-------|----------|---------|--------|----------|--------|-------|----------|--------|-------|----------|
| cg02305377    | 10.23  | 5.11  | 4.54E-02 | 9.32   | 13.97 | 5.05E-01 | 41.51   | 37.83  | 2.72E-01 | 9.11   | 5.81  | 1.17E-01 | 15.90  | 18.81 | 3.98E-01 |
| cg04710628    | -10.81 | 5.40  | 4.54E-02 | -29.59 | 13.27 | 2.58E-02 | 11.53   | 34.84  | 7.41E-01 | -7.25  | 6.32  | 2.51E-01 | -11.07 | 19.01 | 5.60E-01 |
| cg09259037    | 17.17  | 8.58  | 4.54E-02 | 28.28  | 19.97 | 1.57E-01 | 38.07   | 29.82  | 2.02E-01 | 14.71  | 11.38 | 1.96E-01 | 2.60   | 21.23 | 9.02E-01 |
| cg20977794    | 15.92  | 7.95  | 4.54E-02 | 22.94  | 13.05 | 7.88E-02 | -2.24   | 23.04  | 9.23E-01 | 29.02  | 18.96 | 1.26E-01 | 7.66   | 13.78 | 5.78E-01 |
| cg08318076    | 29.61  | 14.80 | 4.54E-02 | 1.21   | 26.77 | 9.64E-01 | 17.86   | 48.65  | 7.14E-01 | 40.51  | 22.69 | 7.42E-02 | 58.65  | 35.22 | 9.59E-02 |
| cg19365673    | 12.64  | 6.32  | 4.54E-02 | -15.55 | 23.70 | 5.12E-01 | -4.57   | 103.36 | 9.65E-01 | 14.88  | 6.82  | 2.92E-02 | 14.85  | 24.28 | 5.41E-01 |
| cg27220968    | 37.38  | 18.68 | 4.54E-02 | 40.83  | 23.59 | 8.36E-02 | -20.04  | 103.60 | 8.47E-01 | 19.50  | 49.52 | 6.94E-01 | 48.74  | 41.97 | 2.45E-01 |
| cg16934473    | -18.87 | 9.43  | 4.54E-02 | -28.53 | 24.50 | 2.44E-01 | 14.91   | 40.50  | 7.13E-01 | -18.17 | 11.18 | 1.04E-01 | -29.24 | 32.11 | 3.62E-01 |
| cg13364624    | 14.32  | 7.16  | 4.54E-02 | 17.57  | 21.42 | 4.12E-01 | -4.96   | 40.53  | 9.03E-01 | 14.20  | 7.99  | 7.55E-02 | 20.58  | 30.80 | 5.04E-01 |
| cg09544282    | 17.85  | 8.92  | 4.54E-02 | 0.64   | 24.37 | 9.79E-01 | 37.83   | 47.39  | 4.25E-01 | 19.86  | 10.20 | 5.15E-02 | 18.78  | 34.85 | 5.90E-01 |
| cg20590797    | -11.27 | 5.63  | 4.54E-02 | -14.47 | 10.17 | 1.55E-01 | -11.02  | 12.60  | 3.82E-01 | -11.63 | 11.31 | 3.04E-01 | -7.11  | 11.39 | 5.32E-01 |
| cg05523057    | 14.82  | 7.41  | 4.54E-02 | 15.57  | 15.18 | 3.05E-01 | 8.44    | 40.96  | 8.37E-01 | 19.06  | 9.95  | 5.54E-02 | 1.56   | 17.70 | 9.30E-01 |
| cg07005294    | 27.89  | 13.94 | 4.54E-02 | 51.77  | 21.86 | 1.79E-02 | 15.04   | 44.78  | 7.37E-01 | 36.96  | 41.62 | 3.74E-01 | 3.21   | 22.49 | 8.86E-01 |
| cg26112706    | -17.59 | 8.79  | 4.54E-02 | -21.62 | 15.71 | 1.69E-01 | -21.13  | 48.03  | 6.60E-01 | -15.86 | 12.01 | 1.87E-01 | -13.70 | 25.65 | 5.93E-01 |
| cg17273045    | 17.07  | 8.53  | 4.54E-02 | 15.37  | 17.79 | 3.87E-01 | 15.89   | 46.45  | 7.32E-01 | 15.94  | 10.57 | 1.32E-01 | 30.81  | 29.31 | 2.93E-01 |
| cg24149295    | 27.75  | 13.87 | 4.54E-02 | 69.84  | 28.41 | 1.40E-02 | 64.39   | 51.72  | 2.13E-01 | 11.10  | 13.46 | 4.09E-01 | 18.99  | 21.99 | 3.88E-01 |
| cg00041575    | -18.81 | 9.40  | 4.55E-02 | -23.68 | 14.18 | 9.50E-02 | -38.31  | 33.84  | 2.58E-01 | -21.62 | 34.16 | 5.27E-01 | -9.34  | 14.73 | 5.26E-01 |
| cg08263647    | 9.05   | 4.53  | 4.55E-02 | 11.46  | 6.15  | 6.26E-02 | 5.48    | 10.87  | 6.15E-01 | 11.32  | 15.75 | 4.72E-01 | 4.78   | 10.05 | 6.34E-01 |
| cg23303074    | 18.97  | 9.48  | 4.55E-02 | 35.05  | 12.74 | 5.95E-03 | -11.09  | 23.88  | 6.43E-01 | 18.38  | 25.25 | 4.67E-01 | 10.72  | 16.02 | 5.03E-01 |
| cg24197567    | -14.66 | 7.33  | 4.55E-02 | -15.55 | 11.87 | 1.90E-01 | -4.33   | 16.36  | 7.91E-01 | -15.47 | 16.62 | 3.52E-01 | -21.71 | 15.50 | 1.61E-01 |
| cg17485549    | 14.62  | 7.31  | 4.55E-02 | 34.66  | 19.44 | 7.46E-02 | 40.86   | 33.28  | 2.20E-01 | 7.85   | 8.36  | 3.48E-01 | 37.11  | 33.53 | 2.68E-01 |
| cg03892781    | -9.61  | 4.80  | 4.55E-02 | -0.35  | 13.18 | 9.79E-01 | -0.58   | 22.87  | 9.80E-01 | -11.08 | 5.57  | 4.67E-02 | -16.31 | 17.01 | 3.37E-01 |
| cg27536187    | -19.35 | 9.67  | 4.55E-02 | -24.74 | 30.24 | 4.13E-01 | -152.02 | 133.19 | 2.54E-01 | -17.22 | 10.56 | 1.03E-01 | -29.34 | 41.84 | 4.83E-01 |
| cg16418598    | 48.13  | 24.06 | 4.55E-02 | 65.70  | 32.70 | 4.45E-02 | 21.87   | 93.18  | 8.14E-01 | -30.39 | 70.09 | 6.65E-01 | 53.57  | 45.95 | 2.44E-01 |
| cg13758913    | 10.41  | 5.21  | 4.55E-02 | 9.53   | 7.51  | 2.04E-01 | 14.16   | 12.82  | 2.70E-01 | 10.91  | 11.71 | 3.51E-01 | 8.56   | 13.15 | 5.15E-01 |
| cg12183861    | 10.21  | 5.10  | 4.55E-02 | 4.25   | 7.51  | 5.71E-01 | 23.18   | 10.52  | 2.76E-02 | 3.90   | 16.96 | 8.18E-01 | 11.49  | 11.09 | 3.00E-01 |
| ch.2.1471425F | -18.52 | 9.26  | 4.55E-02 | -4.10  | 14.62 | 7.79E-01 | -21.80  | 21.82  | 3.18E-01 | -11.60 | 13.26 | 3.82E-01 | -48.01 | 18.37 | 8.97E-03 |
| cg27023755    | 17.24  | 8.62  | 4.55E-02 | -6.06  | 20.99 | 7.73E-01 | 51.67   | 25.94  | 4.63E-02 | 15.98  | 9.57  | 9.51E-02 | 29.32  | 31.41 | 3.51E-01 |
| cg22941974    | -11.96 | 5.98  | 4.55E-02 | -17.92 | 12.98 | 1.67E-01 | 14.03   | 16.46  | 3.94E-01 | -16.74 | 6.59  | 1.11E-02 | -5.17  | 18.10 | 7.75E-01 |
| cg01768981    | 51.77  | 25.88 | 4.55E-02 | 108.82 | 38.74 | 4.97E-03 | -17.02  | 136.63 | 9.01E-01 | 21.19  | 14.51 | 1.44E-01 | 68.51  | 48.15 | 1.55E-01 |
| cg10573476    | 12.91  | 6.45  | 4.55E-02 | 16.03  | 11.32 | 1.57E-01 | 17.61   | 15.52  | 2.56E-01 | 16.16  | 12.14 | 1.83E-01 | 0.40   | 13.78 | 9.77E-01 |
| cg05251190    | 10.08  | 5.04  | 4.55E-02 | 9.49   | 7.45  | 2.03E-01 | 18.30   | 11.70  | 1.18E-01 | 16.67  | 11.04 | 1.31E-01 | -7.70  | 13.13 | 5.57E-01 |
| cg06262302    | -34.50 | 17.25 | 4.55E-02 | -40.53 | 20.52 | 4.83E-02 | 137.58  | 105.60 | 1.93E-01 | -14.61 | 86.07 | 8.65E-01 | -39.51 | 36.23 | 2.75E-01 |
| cg12051980    | 13.99  | 7.00  | 4.55E-02 | 9.79   | 9.50  | 3.03E-01 | 23.03   | 18.41  | 2.11E-01 | 45.92  | 25.47 | 7.14E-02 | 7.96   | 14.35 | 5.79E-01 |
| cg19318511    | 24.58  | 12.29 | 4.55E-02 | 15.53  | 15.39 | 3.13E-01 | 95.95   | 51.15  | 6.07E-02 | 72.40  | 70.61 | 3.05E-01 | 25.29  | 23.45 | 2.81E-01 |

|            |        |       |          |        |       |          |         |        |          |        |       |          |        |       |          |
|------------|--------|-------|----------|--------|-------|----------|---------|--------|----------|--------|-------|----------|--------|-------|----------|
| cg11150383 | 12.57  | 6.28  | 4.55E-02 | 23.64  | 12.26 | 5.39E-02 | 8.81    | 18.71  | 6.38E-01 | 7.52   | 8.82  | 3.94E-01 | 13.21  | 18.29 | 4.70E-01 |
| cg17257944 | 18.84  | 9.42  | 4.55E-02 | 16.98  | 11.81 | 1.51E-01 | 6.41    | 23.97  | 7.89E-01 | 82.31  | 63.49 | 1.95E-01 | 27.94  | 21.75 | 1.99E-01 |
| cg16506815 | 4.58   | 2.29  | 4.55E-02 | 3.98   | 3.16  | 2.08E-01 | 3.76    | 5.38   | 4.85E-01 | 7.48   | 12.79 | 5.59E-01 | 6.02   | 4.49  | 1.80E-01 |
| cg05304177 | 20.99  | 10.50 | 4.55E-02 | 39.19  | 37.40 | 2.95E-01 | 40.31   | 79.75  | 6.13E-01 | 30.36  | 11.51 | 8.35E-03 | -8.11  | 19.37 | 6.75E-01 |
| cg08892499 | 11.57  | 5.78  | 4.55E-02 | 8.54   | 9.24  | 3.55E-01 | -0.36   | 14.87  | 9.81E-01 | 18.91  | 10.28 | 6.58E-02 | 16.32  | 15.45 | 2.91E-01 |
| cg13001142 | 6.14   | 3.07  | 4.55E-02 | 8.71   | 5.08  | 8.62E-02 | 3.73    | 6.73   | 5.80E-01 | 9.76   | 5.71  | 8.76E-02 | -4.59  | 8.25  | 5.78E-01 |
| cg04747619 | -8.03  | 4.01  | 4.55E-02 | -15.44 | 6.49  | 1.73E-02 | -0.86   | 8.80   | 9.23E-01 | -3.91  | 10.26 | 7.03E-01 | -5.23  | 7.93  | 5.10E-01 |
| cg08628233 | 9.15   | 4.58  | 4.55E-02 | 11.62  | 5.70  | 4.16E-02 | 10.72   | 12.23  | 3.81E-01 | -0.48  | 19.24 | 9.80E-01 | 1.22   | 11.46 | 9.16E-01 |
| cg20637223 | -14.06 | 7.03  | 4.55E-02 | -33.39 | 15.36 | 2.97E-02 | 12.17   | 30.52  | 6.90E-01 | -8.22  | 6.17  | 1.83E-01 | -26.28 | 18.41 | 1.53E-01 |
| cg18061485 | -24.58 | 12.29 | 4.55E-02 | -21.91 | 13.42 | 1.02E-01 | -68.88  | 77.09  | 3.72E-01 | -79.55 | 68.99 | 2.49E-01 | -18.47 | 38.14 | 6.28E-01 |
| cg04413130 | -24.47 | 12.23 | 4.55E-02 | -17.28 | 17.55 | 3.25E-01 | -33.34  | 30.57  | 2.75E-01 | -30.40 | 30.04 | 3.11E-01 | -30.24 | 28.21 | 2.84E-01 |
| cg25602692 | -27.12 | 13.56 | 4.55E-02 | -20.34 | 22.16 | 3.59E-01 | -22.38  | 35.38  | 5.27E-01 | -40.19 | 24.38 | 9.92E-02 | -22.33 | 32.96 | 4.98E-01 |
| cg21282131 | 14.42  | 7.21  | 4.55E-02 | 49.31  | 30.61 | 1.07E-01 | -9.61   | 72.75  | 8.95E-01 | 16.28  | 7.68  | 3.40E-02 | -10.77 | 20.12 | 5.93E-01 |
| cg05571310 | 6.79   | 3.40  | 4.55E-02 | 10.66  | 5.03  | 3.42E-02 | 0.91    | 8.12   | 9.11E-01 | 1.91   | 13.04 | 8.84E-01 | 5.46   | 6.18  | 3.76E-01 |
| cg02645034 | 14.26  | 7.13  | 4.55E-02 | 22.91  | 12.45 | 6.57E-02 | -18.81  | 24.67  | 4.46E-01 | 19.43  | 7.60  | 1.06E-02 | -3.56  | 18.47 | 8.47E-01 |
| cg11684826 | -13.82 | 6.91  | 4.55E-02 | -5.31  | 16.78 | 7.52E-01 | 2.86    | 21.35  | 8.93E-01 | -20.85 | 9.19  | 2.33E-02 | -8.94  | 17.25 | 6.04E-01 |
| cg13353550 | 4.46   | 2.23  | 4.55E-02 | 3.75   | 3.24  | 2.47E-01 | 10.08   | 5.08   | 4.72E-02 | 3.40   | 4.47  | 4.47E-01 | -1.38  | 7.78  | 8.60E-01 |
| cg08241117 | -40.94 | 20.48 | 4.55E-02 | -66.34 | 23.97 | 5.64E-03 | 5.97    | 58.69  | 9.19E-01 | -34.19 | 55.95 | 5.41E-01 | 21.59  | 52.74 | 6.82E-01 |
| cg10685228 | -13.97 | 6.99  | 4.55E-02 | 8.71   | 18.52 | 6.38E-01 | -45.37  | 37.15  | 2.22E-01 | -19.11 | 8.84  | 3.07E-02 | -8.46  | 15.72 | 5.91E-01 |
| cg26021103 | -45.90 | 22.95 | 4.55E-02 | -44.11 | 23.04 | 5.55E-02 | -264.02 | 127.34 | 3.81E-02 | -24.83 | 79.31 | 7.54E-01 | -22.83 | 53.09 | 6.67E-01 |
| cg02059519 | 11.64  | 5.82  | 4.55E-02 | 6.84   | 8.69  | 4.31E-01 | 24.58   | 11.78  | 3.69E-02 | 22.26  | 19.26 | 2.48E-01 | 2.47   | 12.55 | 8.44E-01 |
| cg13594869 | -12.69 | 6.35  | 4.55E-02 | -29.34 | 11.53 | 1.09E-02 | -7.50   | 15.38  | 6.26E-01 | -3.81  | 6.44  | 5.54E-01 | -18.72 | 13.48 | 1.65E-01 |
| cg06957310 | 9.98   | 4.99  | 4.55E-02 | 12.82  | 8.28  | 1.22E-01 | 12.95   | 9.63   | 1.79E-01 | 13.10  | 12.13 | 2.80E-01 | -1.90  | 11.21 | 8.65E-01 |
| cg25340881 | 29.90  | 14.95 | 4.56E-02 | 14.66  | 39.91 | 7.13E-01 | -253.93 | 176.80 | 1.51E-01 | 36.14  | 16.87 | 3.21E-02 | 18.77  | 57.96 | 7.46E-01 |
| cg10986030 | -20.03 | 10.02 | 4.56E-02 | -9.79  | 14.94 | 5.12E-01 | -20.27  | 19.05  | 2.87E-01 | 20.19  | 47.60 | 6.71E-01 | -47.63 | 20.93 | 2.28E-02 |
| cg01296230 | 18.90  | 9.45  | 4.56E-02 | 26.00  | 17.18 | 1.30E-01 | 15.26   | 32.19  | 6.36E-01 | 17.76  | 14.35 | 2.16E-01 | 11.35  | 22.46 | 6.13E-01 |
| cg11538516 | 19.70  | 9.85  | 4.56E-02 | 31.26  | 14.04 | 2.60E-02 | 4.04    | 29.11  | 8.90E-01 | 43.84  | 35.63 | 2.18E-01 | 1.54   | 17.52 | 9.30E-01 |
| cg16692757 | 17.15  | 8.58  | 4.56E-02 | -4.02  | 9.82  | 6.82E-01 | 22.35   | 13.14  | 8.90E-02 | 30.25  | 10.96 | 5.77E-03 | 24.06  | 13.39 | 7.24E-02 |
| cg11012061 | 16.06  | 8.03  | 4.56E-02 | 11.49  | 11.94 | 3.36E-01 | 13.68   | 22.23  | 5.38E-01 | 27.63  | 22.20 | 2.13E-01 | 19.07  | 15.01 | 2.04E-01 |
| cg10208821 | -25.22 | 12.61 | 4.56E-02 | -33.55 | 14.22 | 1.83E-02 | -34.65  | 35.30  | 3.26E-01 | 56.40  | 46.58 | 2.26E-01 | -25.91 | 21.64 | 2.31E-01 |
| cg02323779 | 29.25  | 14.63 | 4.56E-02 | 2.40   | 46.79 | 9.59E-01 | -112.72 | 186.00 | 5.44E-01 | 32.10  | 15.90 | 4.35E-02 | 51.19  | 65.67 | 4.36E-01 |
| cg06102777 | 45.13  | 22.57 | 4.56E-02 | 43.93  | 17.57 | 1.24E-02 | -5.46   | 96.34  | 9.55E-01 | 146.31 | 57.95 | 1.16E-02 | 11.66  | 33.51 | 7.28E-01 |
| cg11543937 | -8.21  | 4.11  | 4.56E-02 | -2.22  | 8.31  | 7.89E-01 | -9.86   | 12.16  | 4.18E-01 | -8.08  | 5.64  | 1.52E-01 | -20.33 | 12.33 | 9.91E-02 |
| cg11973132 | 6.00   | 3.00  | 4.56E-02 | 5.37   | 3.69  | 1.46E-01 | 14.33   | 7.59   | 5.88E-02 | -2.51  | 12.20 | 8.37E-01 | 2.92   | 8.65  | 7.35E-01 |
| cg06328855 | 18.52  | 9.26  | 4.56E-02 | -0.28  | 36.04 | 9.94E-01 | 61.67   | 120.61 | 6.09E-01 | 16.91  | 10.07 | 9.30E-02 | 47.36  | 32.46 | 1.45E-01 |

|            |        |       |          |        |       |          |         |        |          |        |       |          |        |       |          |
|------------|--------|-------|----------|--------|-------|----------|---------|--------|----------|--------|-------|----------|--------|-------|----------|
| cg01296927 | -8.88  | 4.44  | 4.56E-02 | -21.30 | 8.73  | 1.46E-02 | -0.63   | 12.27  | 9.59E-01 | -4.18  | 5.24  | 4.24E-01 | -13.35 | 11.58 | 2.49E-01 |
| cg05574870 | 16.86  | 8.43  | 4.56E-02 | 19.96  | 13.16 | 1.29E-01 | -4.27   | 13.44  | 7.51E-01 | 22.71  | 13.39 | 8.99E-02 | 40.13  | 20.39 | 4.90E-02 |
| cg01519345 | 21.64  | 10.82 | 4.56E-02 | -8.55  | 31.20 | 7.84E-01 | -106.46 | 107.18 | 3.21E-01 | 28.96  | 12.03 | 1.61E-02 | 5.10   | 44.31 | 9.08E-01 |
| cg16782613 | 14.50  | 7.25  | 4.56E-02 | 27.37  | 24.14 | 2.57E-01 | 69.88   | 96.97  | 4.71E-01 | 10.41  | 7.99  | 1.93E-01 | 37.82  | 25.46 | 1.37E-01 |
| cg12315997 | 24.82  | 12.42 | 4.56E-02 | 22.72  | 14.10 | 1.07E-01 | 99.87   | 74.28  | 1.79E-01 | 67.72  | 63.53 | 2.86E-01 | 11.53  | 31.21 | 7.12E-01 |
| cg02800216 | -20.57 | 10.29 | 4.56E-02 | -34.70 | 15.94 | 2.95E-02 | 2.37    | 30.00  | 9.37E-01 | -30.21 | 23.27 | 1.94E-01 | -1.78  | 19.81 | 9.28E-01 |
| cg24079591 | -14.64 | 7.32  | 4.56E-02 | -17.72 | 10.56 | 9.33E-02 | -11.41  | 13.66  | 4.04E-01 | -11.78 | 23.25 | 6.12E-01 | -12.56 | 20.08 | 5.32E-01 |
| cg00177388 | 11.28  | 5.64  | 4.56E-02 | 26.30  | 7.81  | 7.53E-04 | 4.40    | 11.66  | 7.06E-01 | 7.32   | 7.87  | 3.52E-01 | 4.01   | 8.10  | 6.21E-01 |
| cg07111415 | 8.74   | 4.37  | 4.56E-02 | 8.24   | 6.44  | 2.01E-01 | 8.56    | 9.82   | 3.83E-01 | 12.33  | 11.18 | 2.70E-01 | 7.22   | 10.08 | 4.74E-01 |
| cg12544663 | 57.74  | 28.89 | 4.56E-02 | 62.23  | 43.08 | 1.49E-01 | 155.37  | 134.59 | 2.48E-01 | 45.53  | 58.95 | 4.40E-01 | 44.19  | 56.20 | 4.32E-01 |
| cg10708588 | 11.77  | 5.89  | 4.56E-02 | 5.04   | 12.25 | 6.81E-01 | 14.12   | 29.75  | 6.35E-01 | 12.85  | 7.47  | 8.53E-02 | 18.96  | 17.82 | 2.87E-01 |
| cg25154630 | -7.54  | 3.77  | 4.56E-02 | 1.75   | 7.58  | 8.18E-01 | -4.34   | 10.88  | 6.90E-01 | -8.77  | 4.25  | 3.89E-02 | -21.09 | 10.25 | 3.97E-02 |
| cg11189837 | 21.36  | 10.69 | 4.56E-02 | 31.32  | 16.21 | 5.33E-02 | 16.98   | 36.04  | 6.38E-01 | 36.41  | 28.77 | 2.06E-01 | 3.63   | 18.35 | 8.43E-01 |
| cg15688070 | 21.80  | 10.91 | 4.56E-02 | 14.04  | 19.30 | 4.67E-01 | 19.87   | 21.31  | 3.51E-01 | 23.52  | 20.30 | 2.47E-01 | 40.87  | 30.21 | 1.76E-01 |
| cg14412111 | -8.78  | 4.39  | 4.56E-02 | -5.60  | 8.07  | 4.88E-01 | -3.86   | 10.11  | 7.02E-01 | -8.00  | 7.60  | 2.92E-01 | -20.61 | 10.35 | 4.63E-02 |
| cg17454086 | -15.38 | 7.69  | 4.56E-02 | -15.03 | 15.40 | 3.29E-01 | -3.78   | 24.79  | 8.79E-01 | -27.52 | 22.43 | 2.20E-01 | -14.96 | 10.51 | 1.54E-01 |
| cg06535102 | -20.56 | 10.29 | 4.56E-02 | -51.73 | 24.90 | 3.77E-02 | -40.57  | 40.05  | 3.11E-01 | -15.99 | 10.04 | 1.11E-01 | 21.54  | 38.01 | 5.71E-01 |
| cg01999333 | 7.69   | 3.85  | 4.56E-02 | 10.72  | 7.18  | 1.35E-01 | 14.77   | 7.82   | 5.90E-02 | 4.70   | 7.04  | 5.05E-01 | -2.11  | 9.27  | 8.20E-01 |
| cg13460643 | 6.67   | 3.34  | 4.56E-02 | 12.96  | 7.71  | 9.31E-02 | 8.43    | 9.21   | 3.60E-01 | 6.00   | 5.64  | 2.87E-01 | 3.13   | 5.80  | 5.90E-01 |
| cg19353897 | 26.01  | 13.01 | 4.56E-02 | 31.43  | 14.55 | 3.08E-02 | -40.54  | 83.07  | 6.26E-01 | 2.29   | 82.01 | 9.78E-01 | 12.04  | 33.53 | 7.19E-01 |
| cg08553467 | 9.68   | 4.84  | 4.56E-02 | 8.17   | 7.01  | 2.44E-01 | 10.10   | 10.51  | 3.37E-01 | 22.34  | 16.50 | 1.76E-01 | 7.63   | 10.23 | 4.56E-01 |
| cg11155687 | 11.86  | 5.93  | 4.56E-02 | 18.76  | 9.32  | 4.41E-02 | 14.69   | 14.31  | 3.05E-01 | 13.37  | 16.03 | 4.04E-01 | -0.37  | 11.10 | 9.73E-01 |
| cg00466268 | 9.01   | 4.51  | 4.56E-02 | 16.06  | 7.29  | 2.76E-02 | 3.04    | 12.39  | 8.06E-01 | 14.76  | 11.07 | 1.83E-01 | 0.07   | 7.98  | 9.93E-01 |
| cg15896259 | -16.97 | 8.49  | 4.57E-02 | -18.72 | 12.57 | 1.36E-01 | -0.19   | 17.16  | 9.91E-01 | -24.93 | 30.24 | 4.10E-01 | -29.19 | 18.11 | 1.07E-01 |
| cg03133735 | -6.72  | 3.36  | 4.57E-02 | -12.47 | 5.24  | 1.74E-02 | -0.63   | 8.01   | 9.38E-01 | -4.76  | 7.38  | 5.19E-01 | -2.41  | 7.41  | 7.45E-01 |
| cg02931810 | 27.37  | 13.69 | 4.57E-02 | 42.56  | 18.92 | 2.45E-02 | -7.30   | 41.56  | 8.61E-01 | 41.76  | 40.91 | 3.07E-01 | 4.62   | 27.10 | 8.65E-01 |
| cg14651705 | 19.60  | 9.81  | 4.57E-02 | 1.01   | 16.42 | 9.51E-01 | 27.51   | 22.86  | 2.29E-01 | 29.26  | 19.54 | 1.34E-01 | 32.81  | 21.52 | 1.27E-01 |
| cg14517454 | -12.76 | 6.38  | 4.57E-02 | -16.84 | 15.54 | 2.78E-01 | 34.42   | 34.23  | 3.15E-01 | -13.02 | 7.68  | 9.00E-02 | -20.00 | 19.60 | 3.08E-01 |
| cg20879601 | 18.83  | 9.42  | 4.57E-02 | 33.35  | 19.39 | 8.54E-02 | 20.64   | 18.01  | 2.52E-01 | 4.58   | 15.34 | 7.65E-01 | 31.78  | 28.08 | 2.58E-01 |
| cg26457075 | -17.31 | 8.66  | 4.57E-02 | -36.06 | 15.93 | 2.35E-02 | -41.27  | 24.59  | 9.32E-02 | -8.46  | 6.91  | 2.21E-01 | -1.81  | 23.54 | 9.39E-01 |
| cg12678507 | 18.92  | 9.47  | 4.57E-02 | 43.62  | 22.81 | 5.58E-02 | 13.37   | 22.76  | 5.57E-01 | 13.12  | 13.17 | 3.19E-01 | 16.78  | 25.54 | 5.11E-01 |
| cg14818866 | 31.03  | 15.53 | 4.57E-02 | 50.12  | 23.61 | 3.38E-02 | 19.28   | 52.27  | 7.12E-01 | 10.14  | 31.57 | 7.48E-01 | 21.90  | 31.85 | 4.92E-01 |
| cg21129864 | -11.01 | 5.51  | 4.57E-02 | -18.86 | 10.85 | 8.21E-02 | -4.51   | 15.44  | 7.70E-01 | -8.71  | 8.54  | 3.08E-01 | -9.79  | 12.34 | 4.28E-01 |
| cg01613691 | 8.64   | 4.32  | 4.57E-02 | 10.44  | 5.96  | 7.97E-02 | 16.55   | 9.60   | 8.45E-02 | -13.97 | 17.14 | 4.15E-01 | 3.24   | 9.52  | 7.33E-01 |
| cg11725972 | -13.18 | 6.60  | 4.57E-02 | -21.67 | 9.70  | 2.55E-02 | 0.43    | 17.81  | 9.81E-01 | -28.47 | 21.59 | 1.87E-01 | -1.82  | 11.90 | 8.79E-01 |

|            |        |       |          |         |       |          |         |        |          |        |       |          |        |       |          |
|------------|--------|-------|----------|---------|-------|----------|---------|--------|----------|--------|-------|----------|--------|-------|----------|
| cg07351192 | 15.58  | 7.79  | 4.57E-02 | 7.53    | 14.32 | 5.99E-01 | 27.91   | 21.62  | 1.97E-01 | 21.21  | 13.17 | 1.07E-01 | 10.23  | 16.50 | 5.35E-01 |
| cg16626194 | 19.74  | 9.88  | 4.57E-02 | 16.44   | 10.90 | 1.31E-01 | 11.21   | 65.47  | 8.64E-01 | -11.52 | 44.28 | 7.95E-01 | 61.92  | 30.38 | 4.15E-02 |
| cg09807524 | -9.27  | 4.64  | 4.57E-02 | -9.85   | 7.49  | 1.88E-01 | -3.93   | 9.08   | 6.65E-01 | -19.50 | 11.88 | 1.01E-01 | -7.35  | 10.31 | 4.76E-01 |
| cg16325628 | -11.21 | 5.61  | 4.57E-02 | 2.33    | 11.69 | 8.42E-01 | -15.01  | 28.94  | 6.04E-01 | -15.45 | 6.86  | 2.44E-02 | -13.35 | 22.05 | 5.45E-01 |
| cg26210364 | -9.41  | 4.71  | 4.57E-02 | -7.34   | 8.79  | 4.04E-01 | 6.75    | 10.85  | 5.34E-01 | -11.97 | 5.42  | 2.72E-02 | -22.23 | 11.36 | 5.04E-02 |
| cg13562011 | 17.20  | 8.61  | 4.57E-02 | 12.54   | 17.07 | 4.63E-01 | 34.59   | 19.31  | 7.33E-02 | 17.54  | 13.23 | 1.85E-01 | -2.26  | 24.44 | 9.26E-01 |
| cg12472416 | -10.49 | 5.25  | 4.57E-02 | -17.87  | 7.76  | 2.13E-02 | -11.68  | 12.05  | 3.32E-01 | -0.06  | 12.28 | 9.96E-01 | -0.48  | 12.73 | 9.70E-01 |
| cg25542907 | 13.85  | 6.93  | 4.57E-02 | 21.65   | 22.55 | 3.37E-01 | 10.91   | 67.72  | 8.72E-01 | 14.58  | 7.59  | 5.47E-02 | -7.86  | 28.16 | 7.80E-01 |
| cg24973864 | -7.70  | 3.86  | 4.57E-02 | -0.76   | 7.26  | 9.16E-01 | -3.25   | 10.48  | 7.56E-01 | -10.26 | 5.87  | 8.03E-02 | -17.35 | 9.93  | 8.05E-02 |
| cg04173396 | 7.06   | 3.54  | 4.57E-02 | 6.35    | 4.78  | 1.84E-01 | 10.30   | 8.81   | 2.42E-01 | 8.84   | 10.20 | 3.86E-01 | 5.05   | 8.54  | 5.54E-01 |
| cg14523204 | 12.70  | 6.36  | 4.57E-02 | 24.36   | 11.19 | 2.94E-02 | 13.72   | 22.74  | 5.46E-01 | 7.84   | 8.63  | 3.64E-01 | -8.66  | 26.69 | 7.46E-01 |
| cg27485334 | 10.56  | 5.29  | 4.57E-02 | 7.99    | 8.86  | 3.67E-01 | 24.94   | 12.19  | 4.08E-02 | 8.50   | 8.88  | 3.38E-01 | 0.18   | 16.57 | 9.92E-01 |
| cg16797831 | -10.24 | 5.13  | 4.57E-02 | -11.78  | 7.18  | 1.01E-01 | -11.67  | 13.44  | 3.85E-01 | 14.12  | 17.63 | 4.23E-01 | -14.34 | 10.06 | 1.54E-01 |
| cg04517722 | 4.39   | 2.20  | 4.57E-02 | 4.50    | 3.95  | 2.55E-01 | 4.57    | 4.93   | 3.53E-01 | 7.71   | 4.83  | 1.10E-01 | 1.73   | 4.13  | 6.76E-01 |
| cg01462537 | -7.12  | 3.57  | 4.57E-02 | -11.93  | 5.58  | 3.26E-02 | -0.13   | 8.39   | 9.88E-01 | -1.20  | 8.82  | 8.91E-01 | -8.21  | 7.16  | 2.51E-01 |
| cg12140668 | -41.81 | 20.93 | 4.57E-02 | -25.83  | 28.84 | 3.70E-01 | -130.44 | 74.49  | 7.99E-02 | -68.03 | 47.21 | 1.50E-01 | -22.95 | 47.01 | 6.25E-01 |
| cg12280798 | 15.37  | 7.69  | 4.57E-02 | 25.62   | 13.79 | 6.31E-02 | 2.35    | 24.87  | 9.25E-01 | 15.53  | 11.36 | 1.71E-01 | 0.29   | 21.03 | 9.89E-01 |
| cg16031250 | 9.96   | 4.98  | 4.57E-02 | 4.15    | 7.26  | 5.68E-01 | 8.18    | 11.37  | 4.72E-01 | 26.39  | 10.19 | 9.59E-03 | 5.80   | 9.54  | 5.44E-01 |
| cg04806979 | -7.23  | 3.62  | 4.57E-02 | -4.69   | 9.44  | 6.19E-01 | 10.74   | 17.33  | 5.36E-01 | -8.82  | 4.33  | 4.17E-02 | -7.60  | 10.77 | 4.80E-01 |
| cg00862883 | -33.60 | 16.82 | 4.57E-02 | -39.27  | 22.46 | 8.05E-02 | -11.75  | 40.95  | 7.74E-01 | -63.65 | 57.69 | 2.70E-01 | -22.59 | 39.00 | 5.63E-01 |
| cg12689679 | -5.45  | 2.73  | 4.57E-02 | -5.60   | 3.75  | 1.36E-01 | -7.09   | 5.99   | 2.36E-01 | 5.20   | 11.60 | 6.54E-01 | -6.28  | 5.99  | 2.95E-01 |
| cg16996682 | -6.88  | 3.45  | 4.57E-02 | -5.17   | 6.91  | 4.55E-01 | -7.36   | 10.94  | 5.01E-01 | -3.61  | 4.72  | 4.44E-01 | -21.20 | 9.05  | 1.92E-02 |
| cg21347733 | 17.07  | 8.54  | 4.57E-02 | 11.79   | 14.90 | 4.29E-01 | 21.16   | 46.97  | 6.52E-01 | 9.77   | 8.49  | 2.50E-01 | 51.53  | 20.40 | 1.15E-02 |
| cg09865955 | 11.04  | 5.53  | 4.57E-02 | -2.91   | 9.09  | 7.49E-01 | 10.23   | 12.92  | 4.29E-01 | 16.27  | 7.47  | 2.95E-02 | 22.43  | 11.82 | 5.77E-02 |
| cg02510736 | 10.32  | 5.16  | 4.57E-02 | 11.89   | 9.06  | 1.89E-01 | 1.86    | 11.59  | 8.73E-01 | 10.97  | 10.07 | 2.76E-01 | 14.97  | 11.16 | 1.80E-01 |
| cg05897087 | 14.07  | 7.04  | 4.57E-02 | 6.06    | 16.24 | 7.09E-01 | 15.94   | 16.79  | 3.42E-01 | 19.13  | 9.39  | 4.17E-02 | -8.52  | 25.95 | 7.43E-01 |
| cg23710611 | -6.43  | 3.22  | 4.58E-02 | -7.64   | 4.82  | 1.13E-01 | -12.20  | 7.38   | 9.82E-02 | 2.23   | 8.10  | 7.83E-01 | -5.11  | 7.11  | 4.73E-01 |
| cg16931969 | -4.22  | 2.11  | 4.58E-02 | -3.54   | 3.30  | 2.83E-01 | -4.27   | 4.15   | 3.04E-01 | -4.38  | 6.15  | 4.77E-01 | -5.36  | 4.56  | 2.40E-01 |
| cg19589903 | -29.06 | 14.55 | 4.58E-02 | 7.40    | 37.74 | 8.45E-01 | -11.11  | 188.56 | 9.53E-01 | -38.19 | 16.57 | 2.12E-02 | -8.86  | 53.27 | 8.68E-01 |
| cg04566159 | 23.64  | 11.84 | 4.58E-02 | -7.84   | 33.00 | 8.12E-01 | -9.26   | 124.17 | 9.41E-01 | 26.41  | 13.31 | 4.73E-02 | 53.79  | 44.18 | 2.23E-01 |
| cg02047319 | 19.25  | 9.64  | 4.58E-02 | 15.50   | 20.39 | 4.47E-01 | -0.90   | 29.23  | 9.75E-01 | 23.61  | 13.25 | 7.47E-02 | 24.41  | 25.85 | 3.45E-01 |
| cg19998148 | -21.62 | 10.82 | 4.58E-02 | -25.61  | 21.68 | 2.38E-01 | 72.68   | 50.68  | 1.52E-01 | -23.22 | 7.84  | 3.05E-03 | -37.50 | 25.84 | 1.47E-01 |
| cg08304059 | 15.10  | 7.56  | 4.58E-02 | 20.11   | 11.17 | 7.18E-02 | 42.59   | 22.10  | 5.40E-02 | 2.11   | 8.29  | 7.99E-01 | 21.65  | 16.02 | 1.77E-01 |
| cg01264751 | -12.70 | 6.36  | 4.58E-02 | -35.67  | 15.28 | 1.96E-02 | 10.36   | 23.02  | 6.53E-01 | -9.51  | 6.68  | 1.55E-01 | -12.28 | 13.09 | 3.48E-01 |
| cg18553354 | -33.63 | 16.84 | 4.58E-02 | -110.81 | 53.96 | 4.00E-02 | -77.20  | 187.08 | 6.80E-01 | -20.04 | 17.64 | 2.56E-01 | -66.30 | 54.07 | 2.20E-01 |



|            |        |       |          |        |       |          |         |        |          |        |        |          |        |       |          |
|------------|--------|-------|----------|--------|-------|----------|---------|--------|----------|--------|--------|----------|--------|-------|----------|
| cg06135425 | -7.18  | 3.59  | 4.58E-02 | -7.44  | 6.57  | 2.57E-01 | -23.37  | 12.92  | 7.04E-02 | -6.27  | 5.17   | 2.26E-01 | -0.82  | 9.57  | 9.32E-01 |
| cg22160726 | -39.26 | 19.66 | 4.58E-02 | -41.85 | 22.49 | 6.28E-02 | -28.44  | 109.40 | 7.95E-01 | 66.67  | 115.33 | 5.63E-01 | -47.59 | 47.05 | 3.12E-01 |
| cg16298282 | -16.35 | 8.18  | 4.58E-02 | -18.60 | 10.02 | 6.36E-02 | 10.29   | 22.16  | 6.42E-01 | -5.28  | 52.99  | 9.21E-01 | -30.18 | 19.66 | 1.25E-01 |
| cg10345164 | -13.45 | 6.73  | 4.58E-02 | -22.90 | 11.88 | 5.38E-02 | -1.99   | 16.63  | 9.05E-01 | -12.92 | 10.69  | 2.27E-01 | -5.41  | 19.53 | 7.82E-01 |
| cg06745955 | 7.53   | 3.77  | 4.58E-02 | 9.32   | 7.05  | 1.86E-01 | -1.55   | 7.48   | 8.36E-01 | 7.00   | 7.43   | 3.46E-01 | 17.13  | 8.40  | 4.14E-02 |
| cg22997415 | 15.68  | 7.85  | 4.58E-02 | 19.24  | 15.59 | 2.17E-01 | 21.53   | 18.65  | 2.48E-01 | 13.58  | 11.80  | 2.50E-01 | 7.68   | 22.02 | 7.27E-01 |
| cg16616599 | -11.89 | 5.95  | 4.58E-02 | -16.13 | 12.50 | 1.97E-01 | -3.05   | 15.17  | 8.41E-01 | -13.89 | 8.30   | 9.42E-02 | -5.90  | 18.42 | 7.49E-01 |
| cg09898060 | -45.76 | 22.91 | 4.58E-02 | -94.00 | 64.19 | 1.43E-01 | -308.34 | 245.06 | 2.08E-01 | -39.85 | 26.22  | 1.28E-01 | -6.51  | 72.39 | 9.28E-01 |
| cg16119246 | 21.77  | 10.90 | 4.58E-02 | 2.09   | 22.65 | 9.27E-01 | 14.19   | 62.07  | 8.19E-01 | 36.55  | 14.09  | 9.49E-03 | -7.37  | 29.23 | 8.01E-01 |
| cg01241798 | 5.81   | 2.91  | 4.58E-02 | 2.68   | 3.93  | 4.96E-01 | 6.42    | 5.72   | 2.61E-01 | 16.69  | 13.30  | 2.09E-01 | 12.83  | 7.59  | 9.10E-02 |
| cg18261434 | -11.30 | 5.66  | 4.58E-02 | -27.43 | 15.34 | 7.37E-02 | 10.71   | 26.45  | 6.86E-01 | -7.41  | 6.69   | 2.68E-01 | -26.74 | 17.60 | 1.29E-01 |
| cg11510938 | 8.48   | 4.25  | 4.58E-02 | 7.93   | 5.32  | 1.36E-01 | 20.71   | 10.84  | 5.61E-02 | -0.30  | 16.36  | 9.85E-01 | 1.87   | 11.30 | 8.69E-01 |
| cg17177455 | 15.97  | 7.99  | 4.58E-02 | 23.22  | 12.79 | 6.95E-02 | 23.03   | 18.76  | 2.20E-01 | 20.02  | 21.09  | 3.43E-01 | -0.56  | 14.99 | 9.70E-01 |
| cg16358696 | -7.61  | 3.81  | 4.58E-02 | -16.22 | 9.89  | 1.01E-01 | -11.66  | 17.75  | 5.11E-01 | -4.76  | 4.53   | 2.93E-01 | -13.24 | 12.18 | 2.77E-01 |
| cg14012546 | 4.74   | 2.37  | 4.58E-02 | 2.90   | 3.09  | 3.47E-01 | 11.58   | 5.54   | 3.64E-02 | 5.34   | 6.79   | 4.32E-01 | 2.37   | 7.43  | 7.50E-01 |
| cg16579337 | 14.12  | 7.07  | 4.58E-02 | 2.44   | 15.14 | 8.72E-01 | 2.74    | 17.97  | 8.79E-01 | 25.33  | 10.13  | 1.24E-02 | 5.83   | 18.93 | 7.58E-01 |
| cg02981942 | -7.25  | 3.63  | 4.58E-02 | -12.39 | 6.98  | 7.58E-02 | -2.96   | 10.42  | 7.77E-01 | -3.76  | 5.50   | 4.94E-01 | -10.96 | 8.71  | 2.08E-01 |
| cg21263208 | -5.77  | 2.89  | 4.58E-02 | -4.64  | 5.03  | 3.56E-01 | -5.97   | 5.54   | 2.81E-01 | -12.22 | 6.28   | 5.16E-02 | -0.14  | 6.69  | 9.83E-01 |
| cg18523477 | -6.35  | 3.18  | 4.58E-02 | -3.77  | 4.27  | 3.78E-01 | -5.71   | 8.20   | 4.86E-01 | -13.80 | 8.81   | 1.17E-01 | -9.73  | 7.83  | 2.14E-01 |
| cg27058931 | -9.89  | 4.95  | 4.58E-02 | -9.06  | 8.14  | 2.65E-01 | -6.18   | 11.41  | 5.88E-01 | -12.72 | 9.64   | 1.87E-01 | -11.32 | 11.74 | 3.35E-01 |
| cg20275558 | 9.52   | 4.77  | 4.58E-02 | 10.91  | 6.53  | 9.44E-02 | 6.69    | 11.85  | 5.73E-01 | 21.83  | 17.40  | 2.10E-01 | 4.25   | 9.94  | 6.69E-01 |
| cg09653271 | 18.70  | 9.37  | 4.58E-02 | -8.08  | 28.72 | 7.79E-01 | -37.04  | 115.29 | 7.48E-01 | 20.82  | 10.23  | 4.17E-02 | 48.79  | 42.80 | 2.54E-01 |
| cg01981181 | 13.53  | 6.78  | 4.58E-02 | 12.97  | 9.83  | 1.87E-01 | 17.71   | 14.24  | 2.14E-01 | 20.48  | 17.91  | 2.53E-01 | 2.75   | 17.20 | 8.73E-01 |
| cg04998379 | 9.78   | 4.90  | 4.59E-02 | 12.95  | 6.91  | 6.09E-02 | 11.18   | 11.77  | 3.42E-01 | 19.52  | 15.25  | 2.00E-01 | -3.07  | 10.42 | 7.68E-01 |
| cg27230472 | 11.99  | 6.00  | 4.59E-02 | 29.91  | 18.23 | 1.01E-01 | -11.11  | 28.32  | 6.95E-01 | 11.40  | 6.71   | 8.93E-02 | 2.53   | 27.85 | 9.27E-01 |
| cg22896917 | 9.72   | 4.87  | 4.59E-02 | 12.16  | 7.04  | 8.41E-02 | 3.52    | 11.38  | 7.57E-01 | 10.22  | 12.57  | 4.16E-01 | 9.15   | 11.20 | 4.14E-01 |
| cg27165884 | 11.45  | 5.74  | 4.59E-02 | 15.08  | 8.02  | 6.00E-02 | 14.35   | 14.59  | 3.25E-01 | 23.09  | 16.21  | 1.54E-01 | -6.59  | 12.56 | 6.00E-01 |
| cg19420101 | -12.50 | 6.26  | 4.59E-02 | -9.29  | 15.48 | 5.49E-01 | -17.28  | 28.42  | 5.43E-01 | -13.52 | 7.35   | 6.58E-02 | -5.31  | 25.16 | 8.33E-01 |
| cg13560123 | 23.38  | 11.71 | 4.59E-02 | 33.69  | 15.79 | 3.28E-02 | 25.27   | 44.38  | 5.69E-01 | 48.94  | 38.55  | 2.04E-01 | -4.94  | 21.80 | 8.21E-01 |
| cg22868943 | -10.91 | 5.47  | 4.59E-02 | -20.44 | 14.31 | 1.53E-01 | -15.39  | 18.69  | 4.10E-01 | -8.30  | 6.77   | 2.20E-01 | -10.32 | 16.08 | 5.21E-01 |
| cg25881591 | 12.30  | 6.16  | 4.59E-02 | 6.80   | 12.29 | 5.80E-01 | 14.61   | 12.86  | 2.56E-01 | 6.04   | 6.63   | 3.62E-01 | 38.06  | 15.29 | 1.28E-02 |
| cg05779585 | 15.56  | 7.79  | 4.59E-02 | 2.43   | 20.13 | 9.04E-01 | 25.77   | 26.27  | 3.27E-01 | 17.70  | 9.35   | 5.84E-02 | 9.44   | 30.04 | 7.53E-01 |
| cg08994384 | 17.12  | 8.58  | 4.59E-02 | 20.57  | 11.01 | 6.18E-02 | -1.44   | 21.95  | 9.48E-01 | 51.04  | 21.93  | 1.99E-02 | 7.23   | 12.08 | 5.49E-01 |
| cg07828833 | 8.41   | 4.21  | 4.59E-02 | 9.65   | 4.53  | 3.31E-02 | 15.53   | 8.68   | 7.36E-02 | 10.32  | 10.83  | 3.41E-01 | -10.67 | 11.45 | 3.51E-01 |
| cg00115639 | 9.35   | 4.68  | 4.59E-02 | 12.41  | 6.83  | 6.95E-02 | 10.68   | 11.77  | 3.64E-01 | 5.00   | 11.20  | 6.55E-01 | 4.87   | 10.56 | 6.45E-01 |

|            |        |       |          |        |       |          |         |        |          |         |       |          |        |       |          |
|------------|--------|-------|----------|--------|-------|----------|---------|--------|----------|---------|-------|----------|--------|-------|----------|
| cg06807928 | -9.50  | 4.76  | 4.59E-02 | -10.52 | 6.31  | 9.54E-02 | -24.79  | 15.11  | 1.01E-01 | 0.86    | 13.43 | 9.49E-01 | -5.65  | 10.48 | 5.90E-01 |
| cg00081084 | 15.55  | 7.79  | 4.59E-02 | 8.59   | 13.64 | 5.29E-01 | 23.44   | 14.48  | 1.06E-01 | 6.50    | 15.31 | 6.71E-01 | 33.98  | 21.91 | 1.21E-01 |
| cg22549504 | 29.98  | 15.02 | 4.59E-02 | -19.32 | 33.83 | 5.68E-01 | 1.28    | 104.43 | 9.90E-01 | 40.07   | 18.48 | 3.01E-02 | 59.92  | 43.03 | 1.64E-01 |
| cg14308082 | 6.55   | 3.28  | 4.59E-02 | 7.97   | 4.50  | 7.70E-02 | 7.06    | 8.43   | 4.02E-01 | 0.47    | 8.16  | 9.54E-01 | 7.54   | 8.30  | 3.63E-01 |
| cg27605414 | 16.03  | 8.03  | 4.59E-02 | -2.90  | 17.01 | 8.65E-01 | -10.39  | 33.11  | 7.54E-01 | 23.53   | 10.13 | 2.02E-02 | 27.70  | 26.64 | 2.99E-01 |
| cg03620373 | 15.22  | 7.62  | 4.59E-02 | 13.87  | 18.80 | 4.61E-01 | 59.94   | 44.79  | 1.81E-01 | 14.57   | 8.98  | 1.05E-01 | 8.19   | 26.03 | 7.53E-01 |
| cg04980991 | 6.04   | 3.02  | 4.59E-02 | 3.34   | 4.69  | 4.76E-01 | 15.75   | 6.76   | 1.98E-02 | 2.25    | 6.41  | 7.26E-01 | 6.15   | 7.52  | 4.13E-01 |
| cg01913436 | 6.83   | 3.42  | 4.59E-02 | 8.86   | 4.74  | 6.17E-02 | 11.06   | 7.98   | 1.66E-01 | 6.27    | 8.89  | 4.80E-01 | -5.00  | 8.89  | 5.74E-01 |
| cg08015776 | -19.69 | 9.86  | 4.59E-02 | -74.79 | 42.93 | 8.15E-02 | 23.30   | 125.46 | 8.53E-01 | -14.08  | 10.69 | 1.88E-01 | -43.71 | 33.07 | 1.86E-01 |
| cg01548249 | 17.48  | 8.76  | 4.59E-02 | 22.47  | 14.09 | 1.11E-01 | 8.02    | 16.99  | 6.37E-01 | 8.10    | 20.85 | 6.98E-01 | 30.52  | 21.12 | 1.48E-01 |
| cg06115835 | -30.86 | 15.46 | 4.59E-02 | -17.22 | 24.19 | 4.76E-01 | 19.36   | 45.90  | 6.73E-01 | -67.61  | 34.87 | 5.25E-02 | -45.21 | 29.13 | 1.21E-01 |
| cg04398950 | -14.20 | 7.11  | 4.59E-02 | -3.82  | 10.79 | 7.23E-01 | -40.94  | 16.10  | 1.10E-02 | -9.16   | 11.94 | 4.43E-01 | -14.84 | 12.51 | 2.35E-01 |
| cg24475517 | 5.41   | 2.71  | 4.59E-02 | 6.09   | 3.54  | 8.54E-02 | 8.08    | 6.74   | 2.31E-01 | 4.28    | 8.42  | 6.11E-01 | 0.64   | 6.98  | 9.27E-01 |
| cg18220632 | -18.38 | 9.21  | 4.59E-02 | -27.54 | 15.62 | 7.79E-02 | -24.81  | 20.57  | 2.28E-01 | -7.29   | 19.24 | 7.05E-01 | -9.73  | 19.50 | 6.18E-01 |
| cg17667648 | 13.09  | 6.56  | 4.59E-02 | 13.98  | 11.56 | 2.27E-01 | 2.19    | 14.40  | 8.79E-01 | 8.61    | 11.59 | 4.58E-01 | 35.75  | 16.90 | 3.44E-02 |
| cg03029175 | 35.29  | 17.68 | 4.59E-02 | 37.65  | 23.89 | 1.15E-01 | 106.06  | 61.13  | 8.27E-02 | -20.43  | 52.96 | 7.00E-01 | 31.39  | 34.83 | 3.68E-01 |
| cg07126167 | 31.29  | 15.67 | 4.59E-02 | 16.41  | 48.63 | 7.36E-01 | 39.91   | 149.55 | 7.90E-01 | 36.75   | 17.53 | 3.61E-02 | -2.48  | 53.36 | 9.63E-01 |
| cg18436984 | 9.65   | 4.83  | 4.59E-02 | 11.76  | 7.14  | 9.96E-02 | 14.39   | 10.39  | 1.66E-01 | -1.60   | 14.50 | 9.12E-01 | 6.18   | 10.43 | 5.54E-01 |
| cg04874782 | 7.26   | 3.64  | 4.59E-02 | 6.66   | 5.22  | 2.02E-01 | 14.19   | 6.63   | 3.23E-02 | 11.19   | 9.73  | 2.50E-01 | -4.31  | 8.14  | 5.96E-01 |
| cg15571705 | -9.15  | 4.58  | 4.59E-02 | -11.54 | 5.48  | 3.51E-02 | -19.19  | 8.25   | 2.00E-02 | -11.04  | 4.59  | 1.61E-02 | 8.66   | 8.56  | 3.12E-01 |
| cg07065054 | -31.54 | 15.80 | 4.59E-02 | -34.20 | 20.43 | 9.41E-02 | -97.88  | 46.51  | 3.53E-02 | -18.86  | 40.25 | 6.39E-01 | 2.28   | 33.96 | 9.47E-01 |
| cg22853485 | -33.01 | 16.54 | 4.59E-02 | -19.50 | 18.97 | 3.04E-01 | -77.87  | 75.13  | 3.00E-01 | -10.50  | 97.88 | 9.15E-01 | -86.39 | 40.90 | 3.47E-02 |
| cg03724799 | -27.41 | 13.73 | 4.59E-02 | -17.29 | 17.81 | 3.32E-01 | -23.27  | 29.94  | 4.37E-01 | -104.25 | 45.05 | 2.07E-02 | -22.31 | 27.34 | 4.15E-01 |
| cg00862618 | -26.18 | 13.11 | 4.59E-02 | -16.36 | 30.11 | 5.87E-01 | 74.68   | 206.86 | 7.18E-01 | -29.03  | 15.51 | 6.12E-02 | -28.61 | 43.42 | 5.10E-01 |
| cg01517025 | -55.00 | 27.56 | 4.59E-02 | -70.16 | 25.91 | 6.77E-03 | -166.93 | 71.54  | 1.96E-02 | -0.12   | 63.45 | 9.99E-01 | -13.95 | 38.62 | 7.18E-01 |
| cg19632005 | 17.01  | 8.52  | 4.59E-02 | 32.64  | 13.57 | 1.62E-02 | 2.81    | 28.97  | 9.23E-01 | 15.68   | 15.54 | 3.13E-01 | -3.77  | 18.25 | 8.36E-01 |
| cg21931986 | -19.26 | 9.65  | 4.59E-02 | -25.14 | 23.29 | 2.80E-01 | -42.73  | 33.39  | 2.01E-01 | -14.65  | 11.72 | 2.11E-01 | -21.59 | 37.24 | 5.62E-01 |
| cg14114377 | -8.31  | 4.16  | 4.59E-02 | -9.55  | 5.91  | 1.06E-01 | -11.52  | 10.54  | 2.74E-01 | -1.86   | 10.20 | 8.56E-01 | -8.08  | 9.81  | 4.10E-01 |
| cg19603836 | -15.73 | 7.88  | 4.59E-02 | -12.72 | 13.79 | 3.56E-01 | -22.72  | 19.94  | 2.55E-01 | -18.06  | 13.58 | 1.84E-01 | -10.77 | 18.52 | 5.61E-01 |
| cg19370934 | 39.61  | 19.84 | 4.59E-02 | 52.82  | 22.54 | 1.91E-02 | 84.40   | 42.77  | 4.85E-02 | 47.69   | 37.53 | 2.04E-01 | -16.24 | 32.04 | 6.12E-01 |
| cg03820120 | 17.97  | 9.00  | 4.59E-02 | 24.74  | 18.81 | 1.89E-01 | -22.09  | 25.38  | 3.84E-01 | 22.34   | 12.75 | 7.99E-02 | 26.87  | 23.46 | 2.52E-01 |
| cg21904807 | -9.77  | 4.89  | 4.59E-02 | -18.29 | 8.31  | 2.78E-02 | -7.31   | 11.09  | 5.10E-01 | -2.18   | 10.11 | 8.29E-01 | -6.65  | 10.34 | 5.20E-01 |
| cg04479212 | 6.67   | 3.34  | 4.59E-02 | 8.77   | 4.87  | 7.18E-02 | 3.22    | 8.12   | 6.91E-01 | 3.97    | 7.64  | 6.03E-01 | 7.32   | 8.12  | 3.67E-01 |
| cg26090855 | 34.60  | 17.34 | 4.59E-02 | 4.41   | 34.70 | 8.99E-01 | 98.31   | 166.33 | 5.54E-01 | 43.72   | 21.70 | 4.39E-02 | 44.71  | 54.44 | 4.11E-01 |
| cg06716182 | -4.75  | 2.38  | 4.60E-02 | -2.29  | 3.41  | 5.01E-01 | -6.29   | 5.30   | 2.35E-01 | 3.06    | 9.35  | 7.44E-01 | -10.33 | 4.77  | 3.05E-02 |

|            |        |       |          |        |       |          |        |        |          |         |       |          |        |       |          |
|------------|--------|-------|----------|--------|-------|----------|--------|--------|----------|---------|-------|----------|--------|-------|----------|
| cg06613111 | 18.32  | 9.18  | 4.60E-02 | 1.51   | 21.19 | 9.43E-01 | 46.34  | 33.88  | 1.71E-01 | 17.91   | 11.76 | 1.28E-01 | 28.75  | 25.54 | 2.60E-01 |
| cg18090918 | 32.82  | 16.44 | 4.60E-02 | 31.18  | 19.67 | 1.13E-01 | 15.57  | 73.58  | 8.32E-01 | 56.34   | 48.81 | 2.48E-01 | 27.99  | 44.34 | 5.28E-01 |
| cg21901227 | 28.66  | 14.36 | 4.60E-02 | 53.60  | 17.46 | 2.14E-03 | 40.69  | 23.65  | 8.53E-02 | -3.11   | 22.43 | 8.90E-01 | 7.87   | 31.90 | 8.05E-01 |
| cg00814909 | -58.76 | 29.44 | 4.60E-02 | -44.06 | 38.67 | 2.55E-01 | 0.09   | 158.47 | 1.00E+00 | -157.72 | 72.12 | 2.87E-02 | -31.65 | 62.87 | 6.15E-01 |
| cg26585452 | -6.99  | 3.50  | 4.60E-02 | -10.15 | 6.33  | 1.09E-01 | -12.55 | 11.07  | 2.57E-01 | -6.51   | 5.55  | 2.41E-01 | -0.16  | 7.95  | 9.84E-01 |
| cg26239085 | -14.17 | 7.10  | 4.60E-02 | -12.31 | 18.94 | 5.16E-01 | -24.20 | 47.77  | 6.13E-01 | -16.83  | 8.09  | 3.75E-02 | 15.80  | 27.44 | 5.65E-01 |
| cg23204276 | 17.29  | 8.66  | 4.60E-02 | 23.38  | 20.61 | 2.57E-01 | -2.14  | 18.33  | 9.07E-01 | 18.17   | 12.35 | 1.41E-01 | 43.43  | 26.33 | 9.91E-02 |
| cg09369124 | -39.39 | 19.74 | 4.60E-02 | -42.45 | 18.75 | 2.36E-02 | 49.09  | 56.88  | 3.88E-01 | -99.32  | 37.33 | 7.79E-03 | -27.53 | 24.08 | 2.53E-01 |
| cg22986077 | -7.57  | 3.79  | 4.60E-02 | -10.39 | 6.32  | 1.00E-01 | -9.87  | 8.02   | 2.19E-01 | -3.37   | 7.33  | 6.46E-01 | -4.84  | 9.82  | 6.22E-01 |
| cg14056644 | 13.29  | 6.66  | 4.60E-02 | 24.27  | 12.10 | 4.50E-02 | 21.75  | 23.30  | 3.50E-01 | 12.80   | 11.07 | 2.48E-01 | -1.84  | 13.23 | 8.89E-01 |
| cg00472281 | -12.03 | 6.03  | 4.60E-02 | -19.22 | 9.86  | 5.13E-02 | -3.91  | 12.84  | 7.61E-01 | -10.09  | 13.34 | 4.49E-01 | -9.56  | 13.43 | 4.77E-01 |
| cg12074707 | -40.78 | 20.43 | 4.60E-02 | -43.25 | 25.67 | 9.21E-02 | -46.24 | 74.22  | 5.33E-01 | -8.80   | 53.54 | 8.69E-01 | -59.22 | 53.65 | 2.70E-01 |
| cg27302870 | 14.91  | 7.47  | 4.60E-02 | 12.82  | 21.95 | 5.59E-01 | -18.57 | 72.54  | 7.98E-01 | 18.12   | 8.34  | 2.98E-02 | -13.25 | 28.18 | 6.38E-01 |
| cg06581840 | 22.07  | 11.06 | 4.60E-02 | 2.24   | 25.64 | 9.30E-01 | -2.23  | 65.34  | 9.73E-01 | 33.23   | 13.34 | 1.27E-02 | -11.63 | 35.44 | 7.43E-01 |
| cg18541417 | 37.69  | 18.89 | 4.60E-02 | 72.71  | 52.50 | 1.66E-01 | -51.30 | 210.70 | 8.08E-01 | 27.93   | 21.21 | 1.88E-01 | 94.44  | 71.81 | 1.88E-01 |
| cg09627757 | -22.51 | 11.28 | 4.60E-02 | -46.65 | 15.89 | 3.33E-03 | -8.26  | 27.24  | 7.62E-01 | -8.03   | 5.74  | 1.62E-01 | -34.76 | 21.48 | 1.06E-01 |
| cg25970491 | -6.68  | 3.35  | 4.60E-02 | -5.01  | 4.84  | 3.00E-01 | -5.38  | 9.15   | 5.57E-01 | -15.89  | 7.17  | 2.67E-02 | -0.61  | 8.11  | 9.40E-01 |
| cg19013178 | -8.86  | 4.44  | 4.60E-02 | -24.87 | 10.83 | 2.16E-02 | -5.10  | 18.99  | 7.88E-01 | -6.92   | 5.36  | 1.97E-01 | 2.19   | 13.61 | 8.72E-01 |
| cg16885982 | 11.52  | 5.77  | 4.60E-02 | 16.74  | 9.96  | 9.29E-02 | 9.90   | 9.54   | 2.99E-01 | 8.95    | 16.18 | 5.80E-01 | 6.64   | 13.99 | 6.35E-01 |
| cg07443529 | 16.37  | 8.20  | 4.60E-02 | 22.25  | 12.25 | 6.93E-02 | 6.68   | 16.97  | 6.94E-01 | 22.25   | 21.61 | 3.03E-01 | 9.34   | 19.70 | 6.36E-01 |
| cg21463605 | 6.67   | 3.34  | 4.60E-02 | 4.20   | 4.67  | 3.69E-01 | 10.67  | 8.01   | 1.83E-01 | 13.59   | 10.98 | 2.16E-01 | 6.31   | 7.08  | 3.72E-01 |
| cg17915961 | 8.39   | 4.21  | 4.60E-02 | 8.09   | 5.91  | 1.71E-01 | 18.95  | 9.38   | 4.34E-02 | 5.52    | 12.03 | 6.47E-01 | -1.11  | 10.21 | 9.14E-01 |
| cg05321225 | -6.00  | 3.01  | 4.60E-02 | -8.12  | 4.15  | 5.01E-02 | -1.79  | 6.80   | 7.93E-01 | 2.59    | 10.60 | 8.07E-01 | -8.06  | 6.79  | 2.35E-01 |
| cg14922545 | 15.90  | 7.97  | 4.60E-02 | -8.70  | 22.20 | 6.95E-01 | 16.51  | 29.49  | 5.75E-01 | 18.36   | 9.31  | 4.85E-02 | 36.53  | 31.43 | 2.45E-01 |
| cg19620383 | -8.20  | 4.11  | 4.60E-02 | -7.80  | 5.57  | 1.61E-01 | -13.08 | 10.68  | 2.21E-01 | -2.69   | 11.78 | 8.20E-01 | -9.07  | 9.53  | 3.41E-01 |
| cg17696109 | 29.35  | 14.71 | 4.60E-02 | 38.41  | 18.22 | 3.50E-02 | -3.68  | 48.05  | 9.39E-01 | 35.19   | 62.36 | 5.73E-01 | 13.56  | 32.99 | 6.81E-01 |
| cg25318579 | 10.93  | 5.48  | 4.60E-02 | 8.53   | 8.66  | 3.24E-01 | 19.59  | 11.87  | 9.89E-02 | 6.76    | 10.35 | 5.14E-01 | 13.59  | 16.78 | 4.18E-01 |
| cg22810684 | 20.24  | 10.14 | 4.60E-02 | 41.12  | 16.51 | 1.28E-02 | 8.30   | 19.35  | 6.68E-01 | 7.69    | 24.20 | 7.51E-01 | 6.33   | 24.44 | 7.96E-01 |
| cg03730946 | -19.05 | 9.55  | 4.60E-02 | -0.23  | 14.35 | 9.87E-01 | -13.67 | 16.47  | 4.07E-01 | -39.81  | 13.96 | 4.35E-03 | -22.77 | 23.97 | 3.42E-01 |
| cg02257791 | -8.22  | 4.12  | 4.60E-02 | -6.12  | 7.88  | 4.37E-01 | -10.40 | 8.86   | 2.41E-01 | -7.54   | 7.42  | 3.09E-01 | -9.77  | 9.17  | 2.87E-01 |
| cg19265913 | -32.28 | 16.18 | 4.60E-02 | -24.89 | 15.38 | 1.06E-01 | 9.33   | 23.10  | 6.86E-01 | -74.48  | 34.59 | 3.13E-02 | -57.30 | 22.29 | 1.01E-02 |
| cg01596892 | 42.55  | 21.33 | 4.60E-02 | 44.02  | 29.86 | 1.41E-01 | -24.12 | 71.71  | 7.37E-01 | 26.19   | 46.55 | 5.74E-01 | 87.31  | 48.71 | 7.31E-02 |
| cg20725539 | 22.87  | 11.46 | 4.60E-02 | 41.61  | 22.91 | 6.93E-02 | -28.69 | 90.88  | 7.52E-01 | 16.56   | 14.80 | 2.63E-01 | 22.23  | 31.38 | 4.79E-01 |
| cg00896282 | -9.25  | 4.64  | 4.60E-02 | -16.92 | 8.78  | 5.39E-02 | -7.27  | 13.01  | 5.76E-01 | -9.94   | 7.29  | 1.73E-01 | 2.23   | 10.68 | 8.35E-01 |
| cg23399279 | 18.58  | 9.31  | 4.60E-02 | 21.71  | 18.59 | 2.43E-01 | 34.82  | 17.73  | 4.95E-02 | 1.46    | 12.51 | 9.07E-01 | 41.08  | 26.14 | 1.16E-01 |

|            |        |       |          |        |       |          |         |        |          |        |       |          |        |       |          |
|------------|--------|-------|----------|--------|-------|----------|---------|--------|----------|--------|-------|----------|--------|-------|----------|
| cg20026346 | 8.50   | 4.26  | 4.60E-02 | 2.28   | 8.68  | 7.93E-01 | 8.65    | 10.63  | 4.16E-01 | 8.51   | 6.21  | 1.70E-01 | 20.16  | 11.99 | 9.26E-02 |
| cg18544058 | 16.65  | 8.35  | 4.61E-02 | 18.49  | 22.76 | 4.17E-01 | -8.47   | 21.14  | 6.89E-01 | 18.17  | 10.61 | 8.67E-02 | 46.81  | 27.76 | 9.17E-02 |
| cg01834878 | -15.59 | 7.82  | 4.61E-02 | 5.44   | 18.34 | 7.67E-01 | -25.40  | 26.95  | 3.46E-01 | -20.46 | 9.77  | 3.62E-02 | -14.29 | 25.46 | 5.75E-01 |
| cg02787120 | -8.59  | 4.31  | 4.61E-02 | -14.14 | 8.27  | 8.73E-02 | -2.10   | 9.78   | 8.30E-01 | -8.98  | 6.51  | 1.68E-01 | -4.31  | 13.80 | 7.55E-01 |
| cg12409211 | 30.15  | 15.11 | 4.61E-02 | 35.49  | 19.31 | 6.61E-02 | -11.13  | 46.72  | 8.12E-01 | 31.08  | 50.77 | 5.40E-01 | 35.12  | 34.29 | 3.06E-01 |
| cg12011136 | 7.64   | 3.83  | 4.61E-02 | 0.32   | 4.84  | 9.48E-01 | 11.77   | 7.22   | 1.03E-01 | 17.28  | 10.35 | 9.49E-02 | 11.53  | 7.14  | 1.06E-01 |
| cg27634020 | 6.14   | 3.08  | 4.61E-02 | 6.78   | 5.24  | 1.96E-01 | -1.72   | 6.89   | 8.03E-01 | 11.37  | 5.46  | 3.73E-02 | 3.86   | 8.38  | 6.45E-01 |
| cg11840804 | 15.85  | 7.95  | 4.61E-02 | 34.05  | 20.97 | 1.04E-01 | 11.47   | 30.09  | 7.03E-01 | 9.94   | 9.39  | 2.90E-01 | 42.89  | 29.79 | 1.50E-01 |
| cg10989261 | 12.75  | 6.39  | 4.61E-02 | 12.39  | 7.62  | 1.04E-01 | -3.50   | 26.20  | 8.94E-01 | 7.56   | 25.23 | 7.64E-01 | 21.77  | 15.38 | 1.57E-01 |
| cg16720005 | -7.13  | 3.57  | 4.61E-02 | -6.69  | 7.01  | 3.40E-01 | -4.36   | 8.54   | 6.10E-01 | -4.90  | 5.65  | 3.86E-01 | -16.14 | 8.79  | 6.65E-02 |
| cg11609472 | 20.08  | 10.07 | 4.61E-02 | 41.49  | 19.87 | 3.68E-02 | 9.23    | 22.28  | 6.79E-01 | 19.27  | 16.25 | 2.36E-01 | 0.97   | 25.54 | 9.70E-01 |
| cg10949753 | -22.75 | 11.41 | 4.61E-02 | -31.23 | 18.00 | 8.26E-02 | -18.36  | 32.15  | 5.68E-01 | -18.84 | 22.26 | 3.97E-01 | -14.05 | 24.90 | 5.73E-01 |
| cg17616707 | -39.58 | 19.84 | 4.61E-02 | -32.81 | 27.41 | 2.31E-01 | -45.94  | 63.47  | 4.69E-01 | -37.60 | 44.42 | 3.97E-01 | -58.12 | 46.91 | 2.15E-01 |
| cg00514407 | 33.58  | 16.84 | 4.61E-02 | 44.81  | 23.97 | 6.15E-02 | -36.32  | 52.93  | 4.93E-01 | 72.37  | 44.30 | 1.02E-01 | 17.99  | 32.97 | 5.85E-01 |
| cg13471188 | 5.60   | 2.81  | 4.61E-02 | 5.50   | 3.55  | 1.22E-01 | 11.03   | 7.08   | 1.19E-01 | 1.15   | 10.63 | 9.14E-01 | 2.37   | 7.30  | 7.46E-01 |
| cg13787029 | -18.21 | 9.13  | 4.61E-02 | -1.58  | 10.40 | 8.79E-01 | -21.57  | 25.89  | 4.05E-01 | -35.76 | 13.19 | 6.72E-03 | -22.79 | 17.71 | 1.98E-01 |
| cg27212729 | 23.69  | 11.88 | 4.61E-02 | 28.04  | 16.61 | 9.13E-02 | 2.06    | 37.39  | 9.56E-01 | -23.24 | 42.11 | 5.81E-01 | 35.67  | 21.40 | 9.56E-02 |
| cg10354926 | -4.92  | 2.47  | 4.61E-02 | -4.80  | 4.43  | 2.79E-01 | -2.75   | 4.95   | 5.79E-01 | -4.20  | 4.30  | 3.29E-01 | -12.20 | 7.37  | 9.78E-02 |
| cg20366479 | 6.35   | 3.18  | 4.61E-02 | 3.25   | 4.71  | 4.90E-01 | 3.08    | 7.80   | 6.93E-01 | 15.40  | 7.98  | 5.36E-02 | 8.77   | 6.84  | 2.00E-01 |
| cg17143696 | 6.91   | 3.47  | 4.61E-02 | 14.32  | 7.20  | 4.66E-02 | 10.33   | 10.51  | 3.26E-01 | 0.95   | 4.50  | 8.34E-01 | 11.51  | 7.37  | 1.18E-01 |
| cg01804382 | 16.61  | 8.33  | 4.61E-02 | 19.49  | 10.63 | 6.67E-02 | -7.70   | 24.56  | 7.54E-01 | 46.62  | 25.68 | 6.94E-02 | 3.77   | 20.46 | 8.54E-01 |
| cg01991180 | -18.58 | 9.32  | 4.61E-02 | -33.20 | 14.14 | 1.88E-02 | -8.55   | 19.53  | 6.62E-01 | -42.21 | 68.86 | 5.40E-01 | -4.51  | 16.47 | 7.84E-01 |
| cg23039660 | 16.38  | 8.21  | 4.61E-02 | 16.74  | 18.59 | 3.68E-01 | -30.93  | 44.88  | 4.91E-01 | 19.72  | 10.16 | 5.21E-02 | 10.64  | 23.91 | 6.56E-01 |
| cg05720891 | 34.34  | 17.22 | 4.61E-02 | 40.51  | 25.14 | 1.07E-01 | 34.21   | 49.29  | 4.88E-01 | 69.35  | 53.50 | 1.95E-01 | 13.03  | 31.17 | 6.76E-01 |
| cg23865980 | 7.74   | 3.88  | 4.61E-02 | 6.62   | 5.17  | 2.01E-01 | 17.92   | 9.72   | 6.52E-02 | 8.85   | 14.99 | 5.55E-01 | 2.66   | 8.49  | 7.54E-01 |
| cg04033451 | -23.35 | 11.71 | 4.61E-02 | -20.91 | 34.59 | 5.46E-01 | -114.67 | 163.83 | 4.84E-01 | -22.06 | 12.88 | 8.68E-02 | -39.53 | 50.23 | 4.31E-01 |
| cg08316941 | -37.65 | 18.88 | 4.61E-02 | -44.75 | 24.42 | 6.68E-02 | -55.56  | 92.35  | 5.47E-01 | 14.41  | 41.10 | 7.26E-01 | -77.87 | 48.89 | 1.11E-01 |
| cg14262955 | 8.61   | 4.32  | 4.61E-02 | 3.39   | 5.78  | 5.57E-01 | 15.96   | 8.95   | 7.46E-02 | 21.65  | 15.54 | 1.63E-01 | 10.12  | 11.92 | 3.96E-01 |
| cg07358634 | -15.78 | 7.91  | 4.61E-02 | -21.49 | 13.99 | 1.25E-01 | -7.88   | 17.77  | 6.58E-01 | -13.55 | 14.24 | 3.41E-01 | -18.30 | 19.04 | 3.37E-01 |
| cg05997350 | 12.33  | 6.18  | 4.61E-02 | 6.09   | 11.81 | 6.06E-01 | -8.50   | 15.36  | 5.80E-01 | 16.95  | 8.32  | 4.17E-02 | 25.87  | 13.24 | 5.07E-02 |
| cg26337985 | 27.58  | 13.83 | 4.61E-02 | 22.21  | 22.52 | 3.24E-01 | 44.95   | 40.49  | 2.67E-01 | 52.48  | 31.75 | 9.84E-02 | 12.64  | 24.60 | 6.07E-01 |
| cg09766510 | 10.24  | 5.14  | 4.61E-02 | 10.06  | 7.97  | 2.07E-01 | 8.38    | 11.83  | 4.79E-01 | -1.12  | 17.28 | 9.48E-01 | 14.89  | 9.26  | 1.08E-01 |
| cg22966302 | -12.86 | 6.45  | 4.61E-02 | -15.84 | 9.76  | 1.05E-01 | -0.94   | 13.65  | 9.45E-01 | -9.98  | 19.49 | 6.09E-01 | -20.10 | 13.41 | 1.34E-01 |
| cg07222421 | -6.10  | 3.06  | 4.61E-02 | -8.57  | 4.84  | 7.69E-02 | 1.42    | 8.91   | 8.74E-01 | -4.17  | 4.92  | 3.96E-01 | -12.96 | 9.93  | 1.92E-01 |
| cg21880101 | -21.52 | 10.79 | 4.61E-02 | -20.10 | 13.54 | 1.38E-01 | 5.66    | 34.25  | 8.69E-01 | -43.28 | 37.88 | 2.53E-01 | -31.44 | 25.12 | 2.11E-01 |

|            |        |       |          |         |       |          |        |        |          |        |       |          |        |       |          |
|------------|--------|-------|----------|---------|-------|----------|--------|--------|----------|--------|-------|----------|--------|-------|----------|
| cg05624954 | 16.19  | 8.12  | 4.61E-02 | 4.50    | 5.78  | 4.36E-01 | 33.92  | 9.24   | 2.42E-04 | 27.16  | 14.72 | 6.50E-02 | 4.93   | 10.54 | 6.40E-01 |
| cg01148127 | 14.61  | 7.33  | 4.62E-02 | 14.60   | 12.07 | 2.26E-01 | 13.56  | 13.89  | 3.29E-01 | 20.91  | 17.44 | 2.31E-01 | 9.99   | 17.43 | 5.67E-01 |
| cg14137698 | 10.38  | 5.20  | 4.62E-02 | 10.97   | 9.09  | 2.27E-01 | 11.22  | 10.88  | 3.03E-01 | 11.93  | 9.53  | 2.10E-01 | 4.51   | 13.67 | 7.41E-01 |
| cg14241879 | 18.22  | 9.14  | 4.62E-02 | 19.92   | 16.78 | 2.35E-01 | 30.22  | 15.99  | 5.88E-02 | -0.55  | 18.62 | 9.76E-01 | 18.90  | 24.70 | 4.44E-01 |
| cg14377171 | -12.49 | 6.26  | 4.62E-02 | -10.37  | 9.93  | 2.97E-01 | -8.98  | 14.93  | 5.48E-01 | -5.81  | 13.67 | 6.71E-01 | -25.68 | 13.45 | 5.62E-02 |
| cg27048138 | -21.17 | 10.62 | 4.62E-02 | 3.95    | 36.70 | 9.14E-01 | 47.84  | 137.26 | 7.27E-01 | -21.83 | 11.57 | 5.92E-02 | -49.68 | 40.51 | 2.20E-01 |
| cg10835365 | -19.00 | 9.53  | 4.62E-02 | -24.91  | 18.12 | 1.69E-01 | -2.68  | 39.94  | 9.46E-01 | -16.91 | 13.07 | 1.96E-01 | -22.04 | 26.00 | 3.96E-01 |
| cg00231812 | 10.89  | 5.46  | 4.62E-02 | 4.96    | 12.48 | 6.91E-01 | 25.73  | 19.87  | 1.95E-01 | 8.08   | 6.68  | 2.27E-01 | 40.52  | 21.59 | 6.05E-02 |
| cg13874780 | 8.96   | 4.50  | 4.62E-02 | 6.52    | 6.07  | 2.82E-01 | 10.67  | 9.09   | 2.40E-01 | 27.99  | 11.82 | 1.79E-02 | 1.73   | 7.97  | 8.28E-01 |
| cg13204687 | -14.28 | 7.16  | 4.62E-02 | -18.30  | 14.03 | 1.92E-01 | 11.37  | 24.88  | 6.48E-01 | -14.36 | 9.99  | 1.51E-01 | -21.49 | 18.94 | 2.57E-01 |
| cg22702857 | -7.19  | 3.61  | 4.62E-02 | -7.70   | 7.55  | 3.08E-01 | 0.37   | 15.43  | 9.81E-01 | -7.41  | 4.76  | 1.19E-01 | -8.39  | 9.56  | 3.80E-01 |
| cg18350895 | 23.26  | 11.67 | 4.62E-02 | 42.54   | 16.36 | 9.30E-03 | 13.10  | 29.36  | 6.55E-01 | 36.17  | 27.61 | 1.90E-01 | -1.73  | 18.38 | 9.25E-01 |
| cg00489219 | -25.80 | 12.94 | 4.62E-02 | -26.13  | 17.36 | 1.32E-01 | -8.03  | 36.21  | 8.25E-01 | -22.09 | 34.59 | 5.23E-01 | -40.54 | 30.80 | 1.88E-01 |
| cg18640185 | 32.33  | 16.21 | 4.62E-02 | 71.28   | 54.03 | 1.87E-01 | 110.40 | 206.09 | 5.92E-01 | 28.21  | 17.93 | 1.16E-01 | 25.06  | 55.19 | 6.50E-01 |
| cg11754402 | 23.54  | 11.81 | 4.62E-02 | 25.63   | 17.33 | 1.39E-01 | 54.08  | 37.30  | 1.47E-01 | 11.22  | 34.71 | 7.47E-01 | 15.38  | 20.88 | 4.61E-01 |
| cg19513193 | -35.45 | 17.78 | 4.62E-02 | -101.38 | 47.29 | 3.20E-02 | 161.43 | 191.38 | 3.99E-01 | -27.68 | 16.18 | 8.72E-02 | -25.21 | 49.06 | 6.07E-01 |
| cg22949077 | -16.28 | 8.17  | 4.62E-02 | -27.82  | 19.95 | 1.63E-01 | -38.10 | 25.57  | 1.36E-01 | -6.22  | 9.05  | 4.92E-01 | -40.49 | 25.17 | 1.08E-01 |
| cg09352720 | 17.63  | 8.84  | 4.62E-02 | 9.51    | 22.14 | 6.68E-01 | 25.71  | 54.90  | 6.40E-01 | 19.57  | 10.33 | 5.81E-02 | 13.47  | 31.01 | 6.64E-01 |
| cg07872789 | -7.98  | 4.00  | 4.62E-02 | -7.96   | 6.95  | 2.52E-01 | -3.83  | 15.30  | 8.02E-01 | -12.53 | 5.96  | 3.54E-02 | 3.93   | 10.40 | 7.06E-01 |
| cg24605325 | -8.51  | 4.27  | 4.62E-02 | -0.44   | 6.46  | 9.46E-01 | -14.92 | 9.87   | 1.31E-01 | -16.81 | 10.33 | 1.04E-01 | -12.89 | 9.40  | 1.70E-01 |
| cg18151030 | 6.43   | 3.22  | 4.62E-02 | 6.22    | 4.61  | 1.77E-01 | 13.28  | 7.80   | 8.87E-02 | 10.61  | 8.52  | 2.13E-01 | -2.08  | 7.27  | 7.75E-01 |
| cg17949981 | 18.54  | 9.30  | 4.62E-02 | -0.02   | 23.05 | 9.99E-01 | -11.62 | 61.77  | 8.51E-01 | 22.81  | 11.16 | 4.10E-02 | 24.68  | 26.83 | 3.58E-01 |
| cg18128550 | -9.69  | 4.86  | 4.62E-02 | -15.66  | 8.42  | 6.28E-02 | -6.94  | 11.83  | 5.58E-01 | -6.80  | 9.26  | 4.63E-01 | -6.40  | 10.31 | 5.35E-01 |
| cg27099274 | 27.31  | 13.70 | 4.62E-02 | 23.58   | 18.14 | 1.94E-01 | -22.20 | 58.68  | 7.05E-01 | 43.09  | 48.99 | 3.79E-01 | 39.44  | 25.17 | 1.17E-01 |
| cg20992439 | -10.95 | 5.50  | 4.62E-02 | -13.16  | 9.03  | 1.45E-01 | -9.65  | 13.85  | 4.86E-01 | -10.40 | 9.73  | 2.85E-01 | -8.10  | 14.05 | 5.64E-01 |
| cg08737296 | 11.82  | 5.93  | 4.62E-02 | 10.42   | 8.78  | 2.35E-01 | 5.36   | 12.08  | 6.57E-01 | 6.59   | 26.66 | 8.05E-01 | 21.49  | 11.78 | 6.80E-02 |
| cg26025557 | 18.16  | 9.11  | 4.62E-02 | 28.55   | 16.63 | 8.60E-02 | 34.88  | 51.70  | 5.00E-01 | 12.52  | 12.29 | 3.08E-01 | 13.66  | 26.45 | 6.06E-01 |
| cg27318481 | 9.45   | 4.74  | 4.62E-02 | 15.97   | 8.04  | 4.71E-02 | 0.02   | 10.90  | 9.98E-01 | 8.60   | 8.19  | 2.94E-01 | 7.91   | 13.21 | 5.50E-01 |
| cg18619616 | 5.20   | 2.61  | 4.62E-02 | 5.80    | 4.28  | 1.76E-01 | 13.97  | 7.88   | 7.62E-02 | 2.96   | 4.07  | 4.68E-01 | 2.76   | 7.91  | 7.27E-01 |
| cg08304103 | -11.34 | 5.69  | 4.62E-02 | -12.56  | 9.13  | 1.69E-01 | 3.12   | 14.29  | 8.27E-01 | -13.00 | 12.99 | 3.17E-01 | -17.10 | 11.14 | 1.25E-01 |
| cg18845984 | -29.71 | 14.91 | 4.62E-02 | -88.89  | 52.62 | 9.12E-02 | -7.95  | 190.41 | 9.67E-01 | -29.83 | 16.19 | 6.53E-02 | 42.22  | 58.21 | 4.68E-01 |
| cg21930399 | -26.66 | 13.38 | 4.62E-02 | -37.02  | 20.61 | 7.24E-02 | -51.91 | 146.10 | 7.22E-01 | -14.91 | 19.90 | 4.54E-01 | -32.84 | 38.85 | 3.98E-01 |
| cg14215105 | -9.26  | 4.65  | 4.62E-02 | -8.36   | 9.06  | 3.56E-01 | -18.38 | 14.80  | 2.14E-01 | -5.96  | 6.60  | 3.66E-01 | -16.04 | 12.28 | 1.91E-01 |
| cg13423980 | 25.64  | 12.86 | 4.62E-02 | 32.29   | 17.17 | 6.00E-02 | 31.52  | 37.53  | 4.01E-01 | 1.54   | 40.77 | 9.70E-01 | 16.49  | 27.31 | 5.46E-01 |
| cg14291919 | 8.43   | 4.23  | 4.62E-02 | 13.54   | 7.78  | 8.16E-02 | 2.80   | 8.89   | 7.52E-01 | 12.98  | 10.05 | 1.97E-01 | 4.96   | 7.71  | 5.20E-01 |

|            |        |       |          |        |       |          |         |        |          |        |       |          |        |       |          |
|------------|--------|-------|----------|--------|-------|----------|---------|--------|----------|--------|-------|----------|--------|-------|----------|
| cg12498094 | -11.97 | 6.00  | 4.63E-02 | -17.68 | 9.60  | 6.55E-02 | -10.18  | 13.59  | 4.54E-01 | -19.07 | 15.10 | 2.06E-01 | -0.19  | 11.87 | 9.87E-01 |
| cg26830108 | 19.77  | 9.92  | 4.63E-02 | -14.20 | 35.43 | 6.89E-01 | -57.47  | 109.77 | 6.01E-01 | 22.24  | 10.90 | 4.14E-02 | 34.46  | 33.93 | 3.10E-01 |
| cg10827460 | -55.79 | 28.00 | 4.63E-02 | -39.06 | 35.89 | 2.76E-01 | -18.02  | 149.06 | 9.04E-01 | -98.20 | 73.07 | 1.79E-01 | -81.05 | 61.17 | 1.85E-01 |
| cg10080728 | 7.44   | 3.73  | 4.63E-02 | 9.36   | 5.30  | 7.70E-02 | 1.11    | 7.41   | 8.81E-01 | 12.60  | 14.83 | 3.95E-01 | 9.18   | 8.66  | 2.89E-01 |
| cg20959676 | 29.57  | 14.84 | 4.63E-02 | 34.90  | 18.82 | 6.37E-02 | -3.55   | 52.96  | 9.47E-01 | -2.18  | 49.08 | 9.65E-01 | 40.04  | 32.47 | 2.17E-01 |
| cg04650789 | 13.42  | 6.73  | 4.63E-02 | 15.49  | 9.36  | 9.80E-02 | 6.69    | 25.43  | 7.92E-01 | 17.05  | 33.74 | 6.13E-01 | 11.42  | 11.03 | 3.00E-01 |
| cg02776641 | -27.20 | 13.65 | 4.63E-02 | -21.99 | 17.67 | 2.13E-01 | -43.40  | 51.65  | 4.01E-01 | -80.46 | 56.55 | 1.55E-01 | -23.10 | 26.03 | 3.75E-01 |
| cg16451661 | 14.43  | 7.24  | 4.63E-02 | 36.88  | 20.03 | 6.56E-02 | 39.99   | 39.93  | 3.17E-01 | 12.48  | 9.08  | 1.69E-01 | 1.75   | 16.19 | 9.14E-01 |
| cg02671333 | 11.05  | 5.54  | 4.63E-02 | 9.25   | 8.08  | 2.52E-01 | 13.68   | 11.66  | 2.41E-01 | 4.52   | 15.14 | 7.65E-01 | 17.67  | 13.46 | 1.89E-01 |
| cg23698058 | -38.72 | 19.43 | 4.63E-02 | -39.07 | 58.34 | 5.03E-01 | -157.03 | 192.30 | 4.14E-01 | -30.43 | 21.89 | 1.64E-01 | -96.61 | 64.35 | 1.33E-01 |
| cg02027010 | 36.15  | 18.14 | 4.63E-02 | 54.03  | 24.15 | 2.52E-02 | 30.87   | 65.41  | 6.37E-01 | 32.76  | 42.49 | 4.41E-01 | -15.33 | 43.23 | 7.23E-01 |
| cg14380519 | -9.68  | 4.86  | 4.63E-02 | -20.65 | 8.66  | 1.70E-02 | -2.73   | 8.84   | 7.58E-01 | -11.14 | 10.86 | 3.05E-01 | -0.69  | 11.34 | 9.52E-01 |
| cg19500275 | 27.89  | 13.99 | 4.63E-02 | 22.21  | 20.03 | 2.67E-01 | -64.34  | 67.44  | 3.40E-01 | 24.17  | 33.72 | 4.74E-01 | 52.77  | 25.70 | 4.00E-02 |
| cg01773443 | 16.14  | 8.10  | 4.63E-02 | 19.73  | 16.29 | 2.26E-01 | 23.65   | 18.46  | 2.00E-01 | 14.65  | 12.05 | 2.24E-01 | 0.80   | 24.60 | 9.74E-01 |
| cg12107072 | 16.12  | 8.09  | 4.63E-02 | 3.18   | 18.51 | 8.63E-01 | 0.36    | 28.76  | 9.90E-01 | 18.25  | 9.89  | 6.49E-02 | 54.15  | 32.96 | 1.00E-01 |
| cg00304823 | 15.81  | 7.93  | 4.63E-02 | 13.70  | 17.92 | 4.45E-01 | -8.02   | 46.77  | 8.64E-01 | 22.38  | 9.57  | 1.93E-02 | -23.03 | 26.73 | 3.89E-01 |
| cg08628635 | 4.93   | 2.48  | 4.63E-02 | 6.36   | 3.19  | 4.63E-02 | 4.93    | 6.45   | 4.45E-01 | 2.48   | 7.37  | 7.37E-01 | 0.74   | 6.65  | 9.12E-01 |
| cg17024257 | 6.66   | 3.34  | 4.63E-02 | 4.37   | 5.20  | 4.00E-01 | 13.19   | 8.22   | 1.09E-01 | 10.50  | 6.29  | 9.51E-02 | -2.13  | 8.98  | 8.12E-01 |
| cg16259229 | 5.95   | 2.99  | 4.63E-02 | 8.13   | 4.18  | 5.18E-02 | 4.69    | 7.32   | 5.21E-01 | -5.43  | 13.14 | 6.80E-01 | 4.79   | 5.74  | 4.04E-01 |
| cg02257517 | 10.39  | 5.22  | 4.63E-02 | 10.34  | 7.24  | 1.53E-01 | 9.22    | 10.88  | 3.97E-01 | 12.27  | 18.01 | 4.96E-01 | 11.22  | 12.75 | 3.79E-01 |
| cg04716261 | -12.69 | 6.37  | 4.63E-02 | -19.40 | 10.68 | 6.93E-02 | -14.87  | 17.95  | 4.07E-01 | -11.75 | 12.18 | 3.35E-01 | -2.87  | 12.88 | 8.24E-01 |
| cg26721803 | -9.87  | 4.96  | 4.63E-02 | -13.61 | 7.63  | 7.45E-02 | -0.89   | 10.92  | 9.35E-01 | -12.83 | 11.70 | 2.73E-01 | -8.55  | 11.28 | 4.48E-01 |
| cg16638834 | -9.29  | 4.66  | 4.63E-02 | -14.34 | 7.37  | 5.18E-02 | -10.64  | 11.55  | 3.57E-01 | -1.84  | 13.24 | 8.90E-01 | -5.09  | 8.33  | 5.42E-01 |
| cg19736369 | 18.23  | 9.15  | 4.63E-02 | 36.30  | 22.98 | 1.14E-01 | -7.14   | 108.50 | 9.48E-01 | 13.48  | 10.69 | 2.08E-01 | 26.06  | 28.67 | 3.63E-01 |
| cg24010952 | 6.77   | 3.40  | 4.63E-02 | 9.00   | 4.91  | 6.66E-02 | 2.06    | 7.90   | 7.94E-01 | 15.63  | 13.79 | 2.57E-01 | 4.09   | 6.49  | 5.28E-01 |
| cg21235251 | -43.81 | 21.99 | 4.63E-02 | -38.13 | 29.09 | 1.90E-01 | -86.25  | 118.58 | 4.67E-01 | 28.36  | 82.04 | 7.30E-01 | -65.41 | 38.72 | 9.11E-02 |
| cg01761758 | 3.91   | 1.96  | 4.63E-02 | 3.32   | 2.78  | 2.33E-01 | 10.23   | 4.31   | 1.75E-02 | 2.00   | 3.55  | 5.73E-01 | -1.92  | 7.01  | 7.84E-01 |
| cg20680592 | 32.10  | 16.11 | 4.63E-02 | 35.77  | 21.27 | 9.26E-02 | 40.33   | 79.45  | 6.12E-01 | 57.62  | 52.88 | 2.76E-01 | 15.61  | 29.81 | 6.01E-01 |
| cg11321190 | -8.27  | 4.15  | 4.64E-02 | -12.33 | 6.43  | 5.52E-02 | -6.63   | 7.18   | 3.56E-01 | 1.26   | 6.28  | 8.42E-01 | -18.42 | 8.19  | 2.45E-02 |
| cg02171008 | -40.00 | 20.08 | 4.64E-02 | -53.61 | 23.54 | 2.27E-02 | -19.31  | 78.25  | 8.05E-01 | 51.04  | 79.89 | 5.23E-01 | -20.50 | 53.07 | 6.99E-01 |
| cg18172358 | -9.68  | 4.86  | 4.64E-02 | -8.77  | 6.64  | 1.87E-01 | -12.38  | 11.17  | 2.68E-01 | -5.61  | 15.97 | 7.25E-01 | -11.61 | 11.37 | 3.07E-01 |
| cg09081544 | -14.82 | 7.44  | 4.64E-02 | -22.01 | 14.15 | 1.20E-01 | -3.55   | 18.09  | 8.45E-01 | -5.38  | 10.41 | 6.05E-01 | -38.66 | 17.53 | 2.75E-02 |
| cg12586150 | 6.61   | 3.32  | 4.64E-02 | 7.10   | 4.38  | 1.05E-01 | 9.65    | 8.33   | 2.46E-01 | 12.11  | 10.36 | 2.42E-01 | -1.45  | 8.18  | 8.59E-01 |
| cg18949702 | 16.65  | 8.36  | 4.64E-02 | 26.10  | 14.54 | 7.27E-02 | 17.34   | 14.59  | 2.35E-01 | 2.55   | 21.11 | 9.04E-01 | 10.51  | 19.45 | 5.89E-01 |
| cg24845274 | 21.55  | 10.82 | 4.64E-02 | 36.38  | 15.13 | 1.62E-02 | -22.55  | 30.28  | 4.57E-01 | 32.37  | 17.88 | 7.03E-02 | 9.43   | 18.64 | 6.13E-01 |

|            |        |       |          |        |       |          |         |        |          |         |       |          |        |       |          |
|------------|--------|-------|----------|--------|-------|----------|---------|--------|----------|---------|-------|----------|--------|-------|----------|
| cg03022732 | 27.22  | 13.66 | 4.64E-02 | 12.49  | 17.49 | 4.75E-01 | 144.81  | 71.43  | 4.26E-02 | 15.14   | 6.50  | 1.98E-02 | 57.69  | 24.51 | 1.86E-02 |
| cg17357865 | -34.85 | 17.49 | 4.64E-02 | -38.90 | 23.48 | 9.77E-02 | -24.53  | 58.57  | 6.75E-01 | 47.72   | 71.75 | 5.06E-01 | -46.94 | 32.13 | 1.44E-01 |
| cg00873811 | 8.29   | 4.16  | 4.64E-02 | 6.51   | 8.75  | 4.57E-01 | 0.45    | 15.81  | 9.77E-01 | 13.69   | 5.36  | 1.07E-02 | -6.02  | 10.75 | 5.75E-01 |
| cg13484467 | 10.32  | 5.18  | 4.64E-02 | 4.59   | 10.82 | 6.71E-01 | 2.24    | 15.21  | 8.83E-01 | 12.41   | 7.98  | 1.20E-01 | 16.18  | 10.73 | 1.32E-01 |
| cg13647486 | 13.43  | 6.74  | 4.64E-02 | 23.30  | 10.07 | 2.07E-02 | 3.27    | 24.95  | 8.96E-01 | 3.12    | 10.87 | 7.74E-01 | 16.41  | 21.91 | 4.54E-01 |
| cg13337307 | 25.33  | 12.71 | 4.64E-02 | 54.59  | 22.24 | 1.41E-02 | 43.07   | 26.60  | 1.05E-01 | 8.03    | 9.32  | 3.89E-01 | 17.40  | 32.65 | 5.94E-01 |
| cg23936609 | 19.18  | 9.63  | 4.64E-02 | 34.53  | 18.74 | 6.54E-02 | 23.42   | 18.50  | 2.06E-01 | 11.73   | 17.07 | 4.92E-01 | -0.13  | 25.18 | 9.96E-01 |
| cg16977799 | 28.04  | 14.08 | 4.64E-02 | 23.48  | 16.46 | 1.54E-01 | 55.84   | 78.15  | 4.75E-01 | 18.84   | 73.94 | 7.99E-01 | 41.86  | 31.47 | 1.83E-01 |
| cg23547411 | -8.52  | 4.28  | 4.64E-02 | -16.65 | 8.15  | 4.11E-02 | -1.81   | 10.09  | 8.57E-01 | -6.44   | 6.59  | 3.28E-01 | -7.20  | 12.14 | 5.53E-01 |
| cg18707858 | 13.48  | 6.77  | 4.64E-02 | 10.07  | 10.23 | 3.25E-01 | -0.42   | 13.67  | 9.75E-01 | 31.20   | 18.11 | 8.49E-02 | 27.14  | 16.06 | 9.11E-02 |
| cg13941254 | -16.03 | 8.05  | 4.64E-02 | -1.01  | 20.93 | 9.61E-01 | 1.10    | 52.25  | 9.83E-01 | -22.39  | 9.24  | 1.54E-02 | 15.81  | 30.67 | 6.06E-01 |
| cg20015412 | -11.75 | 5.90  | 4.64E-02 | -25.20 | 9.31  | 6.77E-03 | -18.06  | 14.72  | 2.20E-01 | -6.59   | 7.25  | 3.63E-01 | 1.81   | 11.89 | 8.79E-01 |
| cg05737718 | 11.15  | 5.60  | 4.64E-02 | 11.60  | 15.24 | 4.47E-01 | 15.79   | 23.73  | 5.06E-01 | 9.60    | 6.52  | 1.41E-01 | 22.57  | 20.90 | 2.80E-01 |
| cg04181327 | 8.85   | 4.44  | 4.64E-02 | 9.55   | 6.40  | 1.36E-01 | 9.81    | 9.27   | 2.90E-01 | 20.91   | 15.56 | 1.79E-01 | 1.38   | 9.79  | 8.88E-01 |
| cg05182418 | -61.71 | 30.98 | 4.64E-02 | -65.67 | 39.10 | 9.31E-02 | -119.50 | 168.81 | 4.79E-01 | -112.94 | 90.92 | 2.14E-01 | -14.99 | 65.71 | 8.20E-01 |
| cg18484034 | 35.85  | 18.00 | 4.64E-02 | 8.24   | 23.91 | 7.30E-01 | 190.20  | 89.08  | 3.27E-02 | 36.24   | 16.57 | 2.87E-02 | 52.32  | 38.27 | 1.72E-01 |
| cg12786680 | 11.43  | 5.74  | 4.64E-02 | 11.38  | 8.23  | 1.67E-01 | 11.50   | 14.26  | 4.20E-01 | 41.30   | 21.75 | 5.76E-02 | 4.10   | 10.82 | 7.05E-01 |
| cg11793422 | 19.01  | 9.55  | 4.64E-02 | 7.43   | 16.90 | 6.60E-01 | 7.63    | 31.41  | 8.08E-01 | 24.42   | 13.80 | 7.67E-02 | 38.70  | 28.83 | 1.80E-01 |
| cg07134632 | 8.05   | 4.04  | 4.64E-02 | 8.79   | 5.22  | 9.23E-02 | 5.65    | 8.91   | 5.26E-01 | 4.46    | 15.13 | 7.68E-01 | 10.52  | 11.50 | 3.60E-01 |
| cg21742790 | 8.19   | 4.11  | 4.64E-02 | 8.47   | 5.35  | 1.13E-01 | 15.81   | 10.76  | 1.42E-01 | 3.24    | 12.38 | 7.93E-01 | 3.40   | 10.48 | 7.46E-01 |
| cg06237151 | 10.58  | 5.31  | 4.64E-02 | 1.40   | 6.13  | 8.20E-01 | 23.05   | 11.00  | 3.62E-02 | 8.27    | 5.06  | 1.02E-01 | 32.00  | 16.34 | 5.01E-02 |
| cg11698750 | 14.18  | 7.12  | 4.64E-02 | 22.77  | 13.06 | 8.12E-02 | -8.21   | 16.70  | 6.23E-01 | 14.44   | 12.21 | 2.37E-01 | 22.02  | 16.72 | 1.88E-01 |
| cg26297530 | 39.97  | 20.07 | 4.64E-02 | 30.65  | 24.89 | 2.18E-01 | -40.92  | 71.44  | 5.67E-01 | 70.55   | 63.31 | 2.65E-01 | 95.03  | 48.64 | 5.07E-02 |
| cg01569875 | -13.64 | 6.85  | 4.64E-02 | -19.21 | 11.45 | 9.34E-02 | 3.25    | 15.91  | 8.38E-01 | -13.25  | 15.12 | 3.81E-01 | -18.48 | 13.65 | 1.76E-01 |
| cg21773820 | -6.92  | 3.48  | 4.64E-02 | -3.37  | 9.08  | 7.11E-01 | 0.00    | 13.71  | 1.00E+00 | -7.50   | 4.19  | 7.36E-02 | -12.65 | 10.99 | 2.50E-01 |
| cg09626521 | -5.01  | 2.52  | 4.64E-02 | -6.71  | 3.31  | 4.29E-02 | 1.00    | 5.15   | 8.46E-01 | -10.22  | 12.57 | 4.16E-01 | -6.72  | 6.62  | 3.10E-01 |
| cg09109411 | 5.22   | 2.62  | 4.64E-02 | 4.69   | 3.43  | 1.72E-01 | 12.40   | 7.53   | 9.94E-02 | 4.27    | 6.62  | 5.19E-01 | 2.25   | 7.01  | 7.48E-01 |
| cg23338668 | 4.33   | 2.18  | 4.64E-02 | 4.46   | 3.11  | 1.52E-01 | 8.41    | 6.15   | 1.72E-01 | 3.67    | 4.04  | 3.63E-01 | 0.32   | 7.10  | 9.65E-01 |
| cg03743262 | -12.53 | 6.29  | 4.64E-02 | -1.24  | 15.12 | 9.34E-01 | -3.15   | 19.40  | 8.71E-01 | -16.40  | 7.82  | 3.60E-02 | -18.50 | 23.21 | 4.25E-01 |
| cg13398192 | 9.29   | 4.66  | 4.64E-02 | 14.69  | 6.98  | 3.53E-02 | -0.78   | 10.00  | 9.38E-01 | 16.65   | 18.87 | 3.77E-01 | 6.84   | 8.91  | 4.43E-01 |
| cg14779271 | -9.20  | 4.62  | 4.64E-02 | -12.70 | 8.83  | 1.50E-01 | -3.42   | 11.81  | 7.72E-01 | -7.60   | 6.72  | 2.58E-01 | -15.92 | 14.51 | 2.73E-01 |
| cg09098720 | -9.47  | 4.75  | 4.64E-02 | -12.84 | 7.09  | 7.01E-02 | -11.37  | 11.42  | 3.20E-01 | -6.82   | 15.30 | 6.56E-01 | -3.80  | 8.98  | 6.72E-01 |
| cg02971546 | -32.46 | 16.30 | 4.65E-02 | -30.28 | 20.50 | 1.40E-01 | 9.14    | 61.53  | 8.82E-01 | 12.99   | 71.71 | 8.56E-01 | -59.49 | 32.88 | 7.04E-02 |
| cg00635674 | 10.14  | 5.09  | 4.65E-02 | 4.85   | 7.96  | 5.42E-01 | 8.66    | 12.02  | 4.71E-01 | 27.51   | 13.07 | 3.53E-02 | 9.32   | 9.98  | 3.50E-01 |
| cg08721324 | 4.98   | 2.50  | 4.65E-02 | 4.72   | 3.12  | 1.30E-01 | 11.60   | 5.64   | 3.96E-02 | -1.70   | 8.78  | 8.46E-01 | -2.62  | 8.96  | 7.70E-01 |

|            |        |       |          |        |       |          |         |        |          |         |       |          |        |       |          |
|------------|--------|-------|----------|--------|-------|----------|---------|--------|----------|---------|-------|----------|--------|-------|----------|
| cg27478700 | 18.92  | 9.50  | 4.65E-02 | 40.01  | 26.21 | 1.27E-01 | -61.34  | 99.67  | 5.38E-01 | 14.27   | 10.63 | 1.79E-01 | 46.57  | 38.66 | 2.28E-01 |
| cg27012424 | -13.87 | 6.97  | 4.65E-02 | -28.64 | 12.43 | 2.12E-02 | -11.77  | 20.75  | 5.71E-01 | -2.39   | 9.05  | 7.92E-01 | -23.81 | 17.18 | 1.66E-01 |
| cg01687189 | 7.34   | 3.69  | 4.65E-02 | 11.52  | 5.82  | 4.78E-02 | 9.96    | 7.93   | 2.09E-01 | 2.41    | 7.78  | 7.57E-01 | 0.16   | 9.28  | 9.86E-01 |
| cg26118713 | 30.60  | 15.37 | 4.65E-02 | 40.36  | 19.95 | 4.30E-02 | -18.16  | 50.55  | 7.19E-01 | 31.17   | 42.91 | 4.68E-01 | 23.26  | 35.65 | 5.14E-01 |
| cg08700190 | 10.47  | 5.26  | 4.65E-02 | 17.96  | 14.16 | 2.04E-01 | 6.34    | 28.69  | 8.25E-01 | 9.37    | 6.02  | 1.19E-01 | 9.51   | 20.43 | 6.41E-01 |
| cg04551053 | 25.84  | 12.98 | 4.65E-02 | 49.53  | 21.63 | 2.20E-02 | 46.54   | 37.40  | 2.13E-01 | 6.91    | 10.36 | 5.05E-01 | 40.10  | 32.87 | 2.22E-01 |
| cg05720355 | 25.86  | 12.99 | 4.65E-02 | 17.68  | 16.50 | 2.84E-01 | 62.82   | 55.56  | 2.58E-01 | 5.83    | 66.43 | 9.30E-01 | 39.13  | 24.23 | 1.06E-01 |
| cg16642545 | -12.97 | 6.52  | 4.65E-02 | -12.00 | 11.99 | 3.17E-01 | -8.16   | 13.66  | 5.50E-01 | -12.61  | 12.53 | 3.14E-01 | -20.12 | 14.33 | 1.60E-01 |
| cg00767644 | -22.43 | 11.26 | 4.65E-02 | 3.23   | 23.74 | 8.92E-01 | -32.96  | 78.97  | 6.76E-01 | -31.89  | 14.27 | 2.54E-02 | -19.86 | 31.08 | 5.23E-01 |
| cg17600231 | 20.34  | 10.22 | 4.65E-02 | 19.22  | 19.96 | 3.36E-01 | 16.05   | 37.64  | 6.70E-01 | 21.08   | 13.45 | 1.17E-01 | 22.39  | 34.49 | 5.16E-01 |
| cg05165689 | -28.14 | 14.13 | 4.65E-02 | -41.33 | 18.01 | 2.17E-02 | -26.75  | 48.61  | 5.82E-01 | -21.22  | 46.89 | 6.51E-01 | 7.20   | 30.92 | 8.16E-01 |
| cg20215454 | -50.49 | 25.36 | 4.65E-02 | -36.94 | 23.66 | 1.18E-01 | -124.25 | 69.79  | 7.50E-02 | 28.79   | 61.02 | 6.37E-01 | -94.41 | 46.27 | 4.13E-02 |
| cg01699584 | -44.17 | 22.18 | 4.65E-02 | -30.28 | 29.18 | 2.99E-01 | -103.85 | 76.07  | 1.72E-01 | -45.40  | 55.74 | 4.15E-01 | -59.56 | 52.48 | 2.56E-01 |
| cg27290215 | -8.52  | 4.28  | 4.65E-02 | -15.76 | 7.94  | 4.71E-02 | -4.05   | 10.26  | 6.93E-01 | -2.67   | 7.17  | 7.10E-01 | -12.82 | 10.15 | 2.07E-01 |
| cg06818307 | 31.38  | 15.76 | 4.65E-02 | -17.90 | 26.08 | 4.92E-01 | 58.10   | 43.46  | 1.81E-01 | 42.29   | 14.08 | 2.66E-03 | 48.34  | 26.21 | 6.51E-02 |
| cg07317802 | 29.69  | 14.91 | 4.65E-02 | 38.70  | 20.08 | 5.39E-02 | 39.94   | 20.16  | 4.76E-02 | 2.04    | 9.36  | 8.28E-01 | 69.41  | 32.62 | 3.34E-02 |
| cg01085803 | 57.23  | 28.75 | 4.65E-02 | 10.62  | 18.95 | 5.75E-01 | 131.98  | 61.24  | 3.12E-02 | 134.58  | 65.76 | 4.07E-02 | 47.07  | 32.67 | 1.50E-01 |
| cg15686202 | -11.08 | 5.57  | 4.65E-02 | -4.40  | 12.64 | 7.28E-01 | -30.63  | 16.34  | 6.09E-02 | -9.17   | 8.36  | 2.73E-01 | -10.59 | 11.23 | 3.46E-01 |
| cg00949753 | 15.08  | 7.58  | 4.65E-02 | 16.08  | 12.76 | 2.08E-01 | 26.39   | 21.87  | 2.27E-01 | 24.61   | 16.58 | 1.38E-01 | 3.48   | 13.41 | 7.95E-01 |
| cg06328127 | -10.71 | 5.38  | 4.65E-02 | -3.79  | 11.12 | 7.33E-01 | -2.87   | 13.74  | 8.34E-01 | -16.73  | 7.65  | 2.87E-02 | -9.38  | 15.68 | 5.50E-01 |
| cg05009512 | 34.43  | 17.30 | 4.65E-02 | 37.69  | 21.82 | 8.41E-02 | 72.91   | 62.08  | 2.40E-01 | 40.34   | 60.35 | 5.04E-01 | 8.36   | 37.59 | 8.24E-01 |
| cg00989538 | -13.55 | 6.81  | 4.65E-02 | -3.95  | 20.96 | 8.50E-01 | -23.16  | 39.56  | 5.58E-01 | -12.80  | 7.53  | 8.92E-02 | -41.45 | 31.06 | 1.82E-01 |
| cg02166842 | -10.63 | 5.34  | 4.65E-02 | -10.11 | 8.77  | 2.49E-01 | 6.75    | 13.08  | 6.06E-01 | -14.50  | 10.65 | 1.73E-01 | -20.63 | 11.62 | 7.57E-02 |
| cg05677712 | 8.94   | 4.49  | 4.65E-02 | 10.64  | 6.45  | 9.91E-02 | 12.88   | 9.04   | 1.54E-01 | 13.50   | 16.17 | 4.04E-01 | -2.31  | 10.29 | 8.22E-01 |
| cg17830754 | -9.51  | 4.78  | 4.65E-02 | -14.35 | 6.99  | 4.02E-02 | 4.02    | 10.79  | 7.09E-01 | -9.12   | 16.92 | 5.90E-01 | -11.15 | 9.40  | 2.36E-01 |
| cg23253914 | -63.09 | 31.69 | 4.65E-02 | -84.12 | 38.74 | 2.99E-02 | 170.77  | 180.22 | 3.43E-01 | -144.79 | 89.41 | 1.05E-01 | -26.71 | 47.93 | 5.77E-01 |
| cg19956147 | 9.56   | 4.80  | 4.65E-02 | 14.48  | 7.80  | 6.32E-02 | -3.29   | 10.24  | 7.48E-01 | 15.20   | 14.10 | 2.81E-01 | 10.61  | 8.99  | 2.38E-01 |
| cg06578434 | 4.95   | 2.48  | 4.65E-02 | 4.19   | 2.85  | 1.42E-01 | 11.59   | 6.70   | 8.35E-02 | 5.32    | 11.83 | 6.53E-01 | -0.91  | 10.06 | 9.28E-01 |
| cg14759494 | -11.63 | 5.84  | 4.65E-02 | -21.79 | 12.28 | 7.61E-02 | 5.51    | 14.62  | 7.07E-01 | -14.72  | 8.40  | 7.96E-02 | -3.51  | 16.14 | 8.28E-01 |
| cg14187687 | 4.60   | 2.31  | 4.65E-02 | 4.23   | 3.05  | 1.66E-01 | 6.43    | 5.44   | 2.37E-01 | 5.60    | 5.92  | 3.44E-01 | 1.74   | 7.58  | 8.18E-01 |
| cg26566411 | 9.99   | 5.02  | 4.65E-02 | 10.92  | 13.14 | 4.06E-01 | 27.69   | 24.50  | 2.59E-01 | 9.75    | 5.78  | 9.13E-02 | -2.13  | 20.87 | 9.19E-01 |
| cg04134048 | -34.78 | 17.47 | 4.65E-02 | -56.83 | 25.71 | 2.71E-02 | -24.51  | 44.39  | 5.81E-01 | 26.24   | 41.16 | 5.24E-01 | -46.20 | 35.54 | 1.94E-01 |
| cg16416987 | 5.89   | 2.96  | 4.65E-02 | 5.28   | 3.59  | 1.41E-01 | 11.90   | 8.14   | 1.44E-01 | 2.10    | 10.25 | 8.38E-01 | 5.30   | 9.19  | 5.64E-01 |
| cg23902114 | 3.98   | 2.00  | 4.65E-02 | 6.05   | 2.94  | 3.97E-02 | 2.90    | 4.02   | 4.72E-01 | 2.41    | 5.21  | 6.43E-01 | 0.81   | 5.23  | 8.77E-01 |
| cg10905180 | 22.32  | 11.21 | 4.65E-02 | 4.35   | 9.83  | 6.58E-01 | 21.40   | 22.77  | 3.47E-01 | 35.26   | 28.73 | 2.20E-01 | 43.83  | 15.47 | 4.62E-03 |



|            |        |       |          |        |       |          |        |        |          |        |       |          |        |       |          |
|------------|--------|-------|----------|--------|-------|----------|--------|--------|----------|--------|-------|----------|--------|-------|----------|
| cg21936550 | -19.18 | 9.64  | 4.66E-02 | -54.41 | 30.74 | 7.67E-02 | 64.84  | 134.89 | 6.31E-01 | -13.46 | 10.45 | 1.98E-01 | -58.94 | 44.89 | 1.89E-01 |
| cg05540913 | -14.38 | 7.22  | 4.66E-02 | -17.71 | 16.34 | 2.78E-01 | -3.20  | 22.97  | 8.89E-01 | -12.80 | 9.22  | 1.65E-01 | -29.91 | 23.89 | 2.10E-01 |
| cg14596108 | -9.27  | 4.66  | 4.66E-02 | -22.71 | 8.43  | 7.02E-03 | -2.81  | 15.92  | 8.60E-01 | -7.56  | 4.44  | 8.84E-02 | 1.49   | 10.61 | 8.88E-01 |
| cg13807985 | 14.44  | 7.25  | 4.66E-02 | 8.80   | 21.58 | 6.83E-01 | -6.26  | 71.84  | 9.31E-01 | 15.30  | 8.29  | 6.52E-02 | 16.17  | 21.71 | 4.56E-01 |
| cg19584649 | 3.95   | 1.99  | 4.66E-02 | 3.34   | 2.71  | 2.19E-01 | 6.37   | 4.62   | 1.68E-01 | 7.21   | 6.39  | 2.60E-01 | 1.61   | 4.66  | 7.30E-01 |
| cg14719959 | 10.55  | 5.30  | 4.66E-02 | 12.53  | 8.24  | 1.28E-01 | -6.37  | 13.35  | 6.33E-01 | 7.75   | 16.29 | 6.35E-01 | 17.16  | 9.33  | 6.57E-02 |
| cg01697732 | 17.94  | 9.02  | 4.66E-02 | 33.54  | 32.98 | 3.09E-01 | -8.41  | 202.03 | 9.67E-01 | 15.75  | 9.69  | 1.04E-01 | 31.65  | 37.56 | 3.99E-01 |
| cg25798026 | 12.04  | 6.05  | 4.66E-02 | 14.67  | 11.01 | 1.83E-01 | -11.24 | 16.61  | 4.99E-01 | 19.12  | 9.87  | 5.27E-02 | 10.10  | 13.88 | 4.67E-01 |
| cg22649991 | 13.67  | 6.87  | 4.66E-02 | -5.22  | 20.82 | 8.02E-01 | 45.00  | 60.97  | 4.60E-01 | 17.75  | 7.60  | 1.95E-02 | -13.55 | 27.66 | 6.24E-01 |
| cg03355808 | -11.06 | 5.56  | 4.66E-02 | -12.24 | 9.82  | 2.13E-01 | -5.37  | 13.50  | 6.91E-01 | -7.06  | 10.28 | 4.92E-01 | -19.11 | 11.90 | 1.08E-01 |
| cg15286032 | 14.61  | 7.34  | 4.66E-02 | 1.78   | 8.43  | 8.33E-01 | 23.93  | 10.25  | 1.96E-02 | 5.15   | 10.89 | 6.36E-01 | 33.05  | 12.50 | 8.19E-03 |
| cg02891726 | 12.12  | 6.09  | 4.66E-02 | 22.33  | 14.33 | 1.19E-01 | 26.16  | 18.59  | 1.59E-01 | 11.49  | 8.09  | 1.56E-01 | -8.46  | 15.96 | 5.96E-01 |
| cg26244013 | -9.19  | 4.62  | 4.66E-02 | -10.51 | 7.49  | 1.60E-01 | -8.90  | 10.13  | 3.80E-01 | -3.87  | 10.67 | 7.17E-01 | -11.65 | 9.74  | 2.31E-01 |
| cg03856949 | 9.40   | 4.72  | 4.66E-02 | 8.86   | 6.61  | 1.80E-01 | 8.04   | 9.79   | 4.12E-01 | 18.06  | 17.06 | 2.90E-01 | 9.00   | 11.16 | 4.20E-01 |
| cg10366867 | 14.74  | 7.40  | 4.66E-02 | 21.48  | 11.58 | 6.37E-02 | 18.65  | 14.18  | 1.89E-01 | 1.28   | 16.28 | 9.37E-01 | 5.44   | 22.12 | 8.06E-01 |
| cg11645674 | 9.32   | 4.68  | 4.66E-02 | 5.19   | 7.42  | 4.84E-01 | 13.52  | 10.24  | 1.87E-01 | 13.15  | 10.36 | 2.04E-01 | 9.25   | 10.80 | 3.92E-01 |
| cg06766626 | -8.25  | 4.15  | 4.66E-02 | -11.32 | 5.91  | 5.52E-02 | -7.38  | 9.16   | 4.21E-01 | -22.83 | 15.53 | 1.42E-01 | 2.02   | 8.62  | 8.15E-01 |
| cg23362089 | 16.88  | 8.48  | 4.66E-02 | 14.16  | 12.46 | 2.56E-01 | 30.72  | 17.24  | 7.48E-02 | 11.40  | 21.81 | 6.01E-01 | 8.10   | 22.43 | 7.18E-01 |
| cg02463426 | -18.68 | 9.39  | 4.66E-02 | -19.03 | 13.35 | 1.54E-01 | -43.37 | 20.16  | 3.15E-02 | 2.05   | 33.56 | 9.51E-01 | -0.13  | 20.47 | 9.95E-01 |
| cg14413050 | 3.68   | 1.85  | 4.66E-02 | 1.56   | 2.60  | 5.48E-01 | 2.07   | 4.47   | 6.44E-01 | 7.07   | 5.21  | 1.75E-01 | 8.40   | 4.18  | 4.45E-02 |
| cg12763430 | -7.15  | 3.59  | 4.66E-02 | -7.09  | 5.72  | 2.15E-01 | -12.27 | 9.18   | 1.82E-01 | -4.91  | 9.04  | 5.87E-01 | -5.76  | 6.61  | 3.83E-01 |
| cg14994947 | 10.21  | 5.13  | 4.66E-02 | 11.23  | 8.57  | 1.90E-01 | 4.75   | 11.60  | 6.82E-01 | 10.68  | 8.76  | 2.23E-01 | 15.49  | 16.00 | 3.33E-01 |
| cg19361800 | 8.34   | 4.19  | 4.66E-02 | 11.60  | 5.71  | 4.22E-02 | 9.77   | 10.33  | 3.44E-01 | 11.11  | 11.82 | 3.47E-01 | -5.34  | 10.13 | 5.98E-01 |
| cg01207951 | 11.27  | 5.66  | 4.66E-02 | 16.61  | 8.23  | 4.36E-02 | 16.03  | 15.37  | 2.97E-01 | 5.82   | 14.46 | 6.87E-01 | 1.43   | 11.62 | 9.02E-01 |
| cg27534833 | 15.69  | 7.88  | 4.66E-02 | 19.22  | 12.32 | 1.19E-01 | 16.47  | 13.60  | 2.26E-01 | 24.50  | 21.81 | 2.61E-01 | -7.37  | 22.38 | 7.42E-01 |
| cg18333643 | 19.76  | 9.93  | 4.66E-02 | 0.95   | 11.43 | 9.34E-01 | 13.74  | 14.77  | 3.52E-01 | 42.49  | 21.46 | 4.77E-02 | 37.11  | 15.40 | 1.60E-02 |
| cg02145319 | 16.86  | 8.48  | 4.66E-02 | -8.93  | 21.95 | 6.84E-01 | 25.06  | 17.59  | 1.54E-01 | 16.32  | 11.76 | 1.65E-01 | 39.26  | 26.90 | 1.44E-01 |
| cg13891768 | 8.71   | 4.38  | 4.66E-02 | 4.91   | 5.75  | 3.93E-01 | 20.40  | 12.71  | 1.09E-01 | 21.10  | 22.08 | 3.39E-01 | 9.99   | 8.56  | 2.43E-01 |
| cg13913407 | 20.68  | 10.40 | 4.66E-02 | -0.44  | 14.92 | 9.76E-01 | 16.22  | 17.68  | 3.59E-01 | 38.69  | 20.86 | 6.36E-02 | 42.44  | 20.34 | 3.70E-02 |
| cg24836833 | 29.34  | 14.74 | 4.66E-02 | 41.08  | 17.54 | 1.92E-02 | 4.93   | 82.52  | 9.52E-01 | 63.50  | 77.78 | 4.14E-01 | -9.47  | 31.06 | 7.60E-01 |
| cg26933686 | 37.96  | 19.08 | 4.66E-02 | 28.97  | 18.30 | 1.13E-01 | 178.42 | 76.00  | 1.89E-02 | 8.81   | 54.74 | 8.72E-01 | 36.42  | 28.47 | 2.01E-01 |
| cg01410878 | 16.79  | 8.44  | 4.66E-02 | 60.73  | 35.16 | 8.41E-02 | -36.59 | 119.29 | 7.59E-01 | 16.86  | 9.15  | 6.55E-02 | -9.63  | 28.42 | 7.35E-01 |
| cg02567500 | 16.11  | 8.10  | 4.66E-02 | 19.14  | 16.70 | 2.52E-01 | -0.67  | 21.16  | 9.75E-01 | 18.62  | 10.93 | 8.84E-02 | 21.31  | 30.62 | 4.87E-01 |
| cg20034617 | 18.96  | 9.53  | 4.66E-02 | 25.66  | 14.68 | 8.04E-02 | 36.45  | 26.24  | 1.65E-01 | 21.37  | 26.16 | 4.14E-01 | 1.58   | 17.02 | 9.26E-01 |
| cg01837492 | 13.65  | 6.86  | 4.66E-02 | 25.93  | 17.40 | 1.36E-01 | -0.28  | 23.60  | 9.91E-01 | 12.38  | 8.26  | 1.34E-01 | 15.68  | 25.83 | 5.44E-01 |

|                |        |       |          |        |       |          |         |        |          |         |       |          |        |       |          |
|----------------|--------|-------|----------|--------|-------|----------|---------|--------|----------|---------|-------|----------|--------|-------|----------|
| cg02006134     | -11.95 | 6.01  | 4.66E-02 | -10.94 | 8.68  | 2.08E-01 | 10.73   | 14.06  | 4.45E-01 | -19.06  | 9.93  | 5.49E-02 | -21.24 | 11.95 | 7.55E-02 |
| cg05704955     | 13.78  | 6.93  | 4.66E-02 | 18.84  | 10.67 | 7.76E-02 | 15.62   | 13.83  | 2.59E-01 | 13.27   | 16.52 | 4.22E-01 | -2.66  | 17.75 | 8.81E-01 |
| cg13868356     | -7.95  | 3.99  | 4.66E-02 | -12.60 | 8.80  | 1.52E-01 | -8.21   | 15.61  | 5.99E-01 | -4.39   | 5.21  | 3.99E-01 | -15.84 | 10.63 | 1.36E-01 |
| cg03928410     | 18.49  | 9.29  | 4.66E-02 | 26.01  | 18.17 | 1.52E-01 | 4.91    | 22.32  | 8.26E-01 | 19.63   | 13.95 | 1.59E-01 | 17.52  | 26.72 | 5.12E-01 |
| cg00602811     | 6.60   | 3.32  | 4.66E-02 | 8.19   | 4.30  | 5.67E-02 | 0.05    | 5.89   | 9.93E-01 | 18.60   | 8.60  | 3.06E-02 | 3.08   | 7.64  | 6.87E-01 |
| cg03548645     | -51.22 | 25.74 | 4.66E-02 | -31.27 | 32.44 | 3.35E-01 | 104.17  | 135.60 | 4.42E-01 | -109.70 | 61.04 | 7.23E-02 | -90.16 | 59.02 | 1.27E-01 |
| cg19823847     | -8.32  | 4.18  | 4.67E-02 | -11.96 | 8.64  | 1.66E-01 | -2.99   | 14.29  | 8.34E-01 | -4.20   | 5.81  | 4.70E-01 | -19.00 | 10.37 | 6.71E-02 |
| cg13599613     | 4.14   | 2.08  | 4.67E-02 | 2.53   | 2.71  | 3.51E-01 | 9.73    | 4.43   | 2.80E-02 | -0.17   | 6.60  | 9.80E-01 | 5.60   | 6.82  | 4.12E-01 |
| cg09050062     | 45.21  | 22.72 | 4.67E-02 | -1.70  | 55.30 | 9.76E-01 | -313.89 | 283.38 | 2.68E-01 | 61.63   | 26.45 | 1.98E-02 | 23.30  | 77.29 | 7.63E-01 |
| cg05883695     | 8.09   | 4.07  | 4.67E-02 | 6.13   | 9.29  | 5.09E-01 | 17.63   | 12.74  | 1.66E-01 | 6.31    | 5.12  | 2.18E-01 | 14.90  | 14.67 | 3.10E-01 |
| cg07393674     | 30.50  | 15.33 | 4.67E-02 | 36.36  | 22.13 | 1.00E-01 | 31.92   | 44.20  | 4.70E-01 | -24.16  | 42.88 | 5.73E-01 | 45.20  | 29.40 | 1.24E-01 |
| cg24181266     | 17.82  | 8.96  | 4.67E-02 | 37.14  | 26.37 | 1.59E-01 | 2.29    | 72.64  | 9.75E-01 | 14.78   | 10.34 | 1.53E-01 | 20.30  | 26.06 | 4.36E-01 |
| cg13443950     | -11.97 | 6.02  | 4.67E-02 | -19.34 | 10.06 | 5.45E-02 | -9.88   | 13.27  | 4.57E-01 | 2.22    | 12.46 | 8.59E-01 | -17.42 | 13.36 | 1.92E-01 |
| cg24853956     | 11.06  | 5.56  | 4.67E-02 | 19.26  | 7.94  | 1.52E-02 | 5.58    | 14.36  | 6.98E-01 | 17.83   | 19.07 | 3.50E-01 | -2.58  | 10.57 | 8.07E-01 |
| cg04650899     | -36.88 | 18.54 | 4.67E-02 | -72.66 | 61.11 | 2.34E-01 | -158.77 | 241.91 | 5.12E-01 | -34.69  | 20.50 | 9.05E-02 | -10.41 | 64.08 | 8.71E-01 |
| cg18053846     | -8.75  | 4.40  | 4.67E-02 | -12.29 | 9.52  | 1.97E-01 | 2.04    | 13.81  | 8.83E-01 | -9.50   | 6.07  | 1.17E-01 | -8.37  | 10.99 | 4.46E-01 |
| cg03738134     | 20.50  | 10.31 | 4.67E-02 | 44.04  | 35.34 | 2.13E-01 | 103.17  | 94.39  | 2.74E-01 | 14.82   | 11.88 | 2.12E-01 | 29.09  | 26.61 | 2.74E-01 |
| cg12814353     | -7.00  | 3.52  | 4.67E-02 | -9.11  | 6.87  | 1.85E-01 | -7.54   | 8.49   | 3.74E-01 | -6.89   | 5.48  | 2.08E-01 | -3.06  | 9.02  | 7.35E-01 |
| cg15601529     | -8.96  | 4.50  | 4.67E-02 | -12.98 | 6.82  | 5.71E-02 | -11.12  | 9.35   | 2.35E-01 | -3.67   | 14.37 | 7.98E-01 | -1.55  | 9.30  | 8.67E-01 |
| cg00024989     | 11.08  | 5.57  | 4.67E-02 | 11.50  | 8.03  | 1.52E-01 | 23.42   | 13.08  | 7.34E-02 | 10.50   | 13.93 | 4.51E-01 | -2.10  | 13.20 | 8.74E-01 |
| cg10381440     | 9.50   | 4.78  | 4.67E-02 | 10.36  | 6.84  | 1.30E-01 | 23.27   | 11.35  | 4.04E-02 | 3.69    | 11.83 | 7.55E-01 | -1.57  | 11.51 | 8.92E-01 |
| cg24382823     | 10.66  | 5.36  | 4.67E-02 | 4.71   | 5.98  | 4.31E-01 | 18.37   | 13.55  | 1.75E-01 | 28.14   | 11.32 | 1.29E-02 | 4.42   | 8.82  | 6.16E-01 |
| cg17929492     | -57.56 | 28.94 | 4.67E-02 | -91.76 | 67.55 | 1.74E-01 | -109.59 | 159.06 | 4.91E-01 | -39.94  | 36.09 | 2.68E-01 | -81.26 | 77.24 | 2.93E-01 |
| cg27075800     | -12.87 | 6.47  | 4.67E-02 | -1.23  | 17.91 | 9.45E-01 | -27.66  | 34.99  | 4.29E-01 | -12.92  | 7.42  | 8.15E-02 | -26.11 | 23.83 | 2.73E-01 |
| cg27444414     | -17.26 | 8.68  | 4.67E-02 | -10.90 | 17.79 | 5.40E-01 | 1.41    | 35.28  | 9.68E-01 | -24.00  | 11.39 | 3.51E-02 | -6.74  | 24.99 | 7.87E-01 |
| cg22093095     | 28.60  | 14.38 | 4.67E-02 | 15.51  | 21.07 | 4.62E-01 | 37.21   | 53.04  | 4.83E-01 | 46.84   | 27.41 | 8.75E-02 | 31.00  | 33.37 | 3.53E-01 |
| cg26110991     | -16.01 | 8.05  | 4.67E-02 | -7.81  | 10.95 | 4.76E-01 | -31.95  | 19.08  | 9.41E-02 | -17.56  | 27.89 | 5.29E-01 | -23.39 | 18.07 | 1.95E-01 |
| ch.10.2809628F | -40.91 | 20.57 | 4.67E-02 | -31.32 | 24.71 | 2.05E-01 | -54.42  | 144.00 | 7.06E-01 | -190.75 | 99.01 | 5.40E-02 | -40.53 | 41.70 | 3.31E-01 |
| cg11846956     | 12.86  | 6.47  | 4.67E-02 | 25.49  | 12.48 | 4.11E-02 | 9.06    | 17.53  | 6.05E-01 | 12.64   | 14.01 | 3.67E-01 | 5.48   | 10.45 | 6.00E-01 |
| cg17784403     | 10.93  | 5.50  | 4.67E-02 | 18.34  | 8.81  | 3.75E-02 | -1.25   | 16.56  | 9.40E-01 | 15.06   | 14.71 | 3.06E-01 | 5.08   | 9.14  | 5.79E-01 |
| cg27190145     | -9.88  | 4.97  | 4.67E-02 | -12.53 | 8.41  | 1.36E-01 | -10.98  | 12.10  | 3.64E-01 | -2.65   | 10.47 | 8.00E-01 | -11.86 | 9.78  | 2.25E-01 |
| cg21563683     | 11.09  | 5.58  | 4.67E-02 | 21.19  | 7.66  | 5.70E-03 | 10.50   | 15.03  | 4.85E-01 | 6.83    | 14.26 | 6.32E-01 | -0.52  | 9.27  | 9.56E-01 |
| cg10779037     | -14.24 | 7.16  | 4.67E-02 | -12.50 | 9.44  | 1.86E-01 | -6.84   | 16.04  | 6.70E-01 | -14.58  | 29.64 | 6.23E-01 | -28.90 | 17.50 | 9.86E-02 |
| cg25291603     | 33.40  | 16.79 | 4.67E-02 | 43.20  | 21.83 | 4.78E-02 | 123.45  | 91.42  | 1.77E-01 | 41.05   | 59.25 | 4.88E-01 | 1.26   | 30.97 | 9.68E-01 |
| cg04226823     | 10.77  | 5.42  | 4.67E-02 | 9.94   | 8.74  | 2.55E-01 | 12.52   | 10.26  | 2.23E-01 | 14.62   | 17.34 | 3.99E-01 | 8.51   | 11.07 | 4.42E-01 |

|            |        |       |          |        |       |          |         |        |          |        |       |          |        |       |          |
|------------|--------|-------|----------|--------|-------|----------|---------|--------|----------|--------|-------|----------|--------|-------|----------|
| cg00058291 | 9.23   | 4.64  | 4.67E-02 | 10.39  | 6.77  | 1.25E-01 | 19.83   | 11.40  | 8.20E-02 | 7.15   | 10.00 | 4.74E-01 | -3.27  | 12.04 | 7.86E-01 |
| cg08690859 | 11.17  | 5.62  | 4.67E-02 | 20.52  | 11.45 | 7.31E-02 | 13.14   | 13.91  | 3.45E-01 | 6.06   | 9.17  | 5.09E-01 | 8.21   | 11.93 | 4.91E-01 |
| cg14272075 | 4.96   | 2.50  | 4.67E-02 | 5.42   | 3.18  | 8.80E-02 | 6.71    | 6.23   | 2.81E-01 | 5.85   | 7.68  | 4.46E-01 | -0.66  | 7.31  | 9.28E-01 |
| cg07780485 | -40.85 | 20.54 | 4.67E-02 | -43.21 | 28.06 | 1.24E-01 | -103.70 | 81.09  | 2.01E-01 | -7.27  | 47.57 | 8.79E-01 | -45.36 | 44.47 | 3.08E-01 |
| cg05146756 | 12.15  | 6.11  | 4.67E-02 | 15.87  | 8.47  | 6.09E-02 | 7.73    | 15.96  | 6.28E-01 | 17.41  | 20.65 | 3.99E-01 | 5.03   | 12.33 | 6.83E-01 |
| cg02604890 | 15.42  | 7.76  | 4.67E-02 | 33.11  | 15.26 | 3.00E-02 | 14.67   | 21.18  | 4.88E-01 | 10.30  | 10.70 | 3.35E-01 | -6.21  | 27.06 | 8.18E-01 |
| cg08236285 | -6.48  | 3.26  | 4.67E-02 | -10.98 | 6.45  | 8.85E-02 | -7.47   | 8.90   | 4.01E-01 | -2.30  | 4.67  | 6.22E-01 | -12.53 | 9.26  | 1.76E-01 |
| cg25989057 | -28.66 | 14.41 | 4.67E-02 | -15.58 | 48.59 | 7.48E-01 | -172.27 | 192.60 | 3.71E-01 | -27.85 | 16.06 | 8.29E-02 | -38.53 | 45.31 | 3.95E-01 |
| cg01401465 | -11.01 | 5.54  | 4.67E-02 | -17.90 | 12.72 | 1.59E-01 | 17.68   | 25.02  | 4.80E-01 | -11.46 | 6.75  | 8.95E-02 | -8.74  | 18.60 | 6.38E-01 |
| cg19202813 | -9.23  | 4.64  | 4.68E-02 | -10.23 | 8.40  | 2.23E-01 | 6.62    | 12.42  | 5.94E-01 | -11.44 | 7.20  | 1.12E-01 | -16.32 | 12.42 | 1.89E-01 |
| cg02533993 | -44.46 | 22.36 | 4.68E-02 | -50.63 | 20.88 | 1.53E-02 | -72.44  | 80.43  | 3.68E-01 | 52.71  | 57.91 | 3.63E-01 | -79.63 | 44.94 | 7.64E-02 |
| cg04448709 | 11.79  | 5.93  | 4.68E-02 | 0.27   | 17.03 | 9.87E-01 | -21.54  | 30.55  | 4.81E-01 | 13.33  | 6.65  | 4.51E-02 | 42.31  | 27.42 | 1.23E-01 |
| cg12412089 | 6.26   | 3.15  | 4.68E-02 | 4.64   | 3.80  | 2.22E-01 | 11.20   | 5.68   | 4.86E-02 | 20.57  | 10.63 | 5.29E-02 | 0.63   | 4.82  | 8.96E-01 |
| cg27587307 | -14.49 | 7.29  | 4.68E-02 | -23.42 | 12.22 | 5.52E-02 | -5.31   | 17.25  | 7.58E-01 | -10.26 | 14.93 | 4.92E-01 | -12.16 | 15.30 | 4.27E-01 |
| cg21400442 | -9.27  | 4.66  | 4.68E-02 | -10.26 | 13.16 | 4.35E-01 | -7.59   | 19.88  | 7.03E-01 | -7.86  | 5.40  | 1.46E-01 | -23.01 | 17.08 | 1.78E-01 |
| cg01820665 | 8.32   | 4.18  | 4.68E-02 | 6.04   | 6.26  | 3.35E-01 | 11.49   | 8.25   | 1.64E-01 | 11.06  | 12.00 | 3.57E-01 | 7.57   | 9.97  | 4.48E-01 |
| cg23545906 | -21.89 | 11.01 | 4.68E-02 | -19.45 | 17.38 | 2.63E-01 | -52.78  | 23.06  | 2.21E-02 | -0.12  | 14.96 | 9.94E-01 | -33.26 | 21.06 | 1.14E-01 |
| cg13981787 | 13.71  | 6.89  | 4.68E-02 | 15.09  | 9.34  | 1.06E-01 | 12.22   | 17.67  | 4.89E-01 | 10.33  | 24.75 | 6.76E-01 | 12.54  | 14.51 | 3.88E-01 |
| cg02263144 | -5.62  | 2.82  | 4.68E-02 | -4.77  | 3.88  | 2.19E-01 | -9.26   | 7.62   | 2.24E-01 | -3.35  | 8.18  | 6.82E-01 | -6.62  | 6.10  | 2.78E-01 |
| cg14093474 | 9.82   | 4.94  | 4.68E-02 | 11.62  | 6.77  | 8.62E-02 | 24.48   | 12.27  | 4.60E-02 | 8.46   | 12.05 | 4.82E-01 | -3.52  | 10.28 | 7.32E-01 |
| cg21778810 | -14.37 | 7.23  | 4.68E-02 | -22.15 | 15.98 | 1.66E-01 | -19.65  | 52.96  | 7.11E-01 | -12.59 | 8.48  | 1.38E-01 | -6.61  | 31.99 | 8.36E-01 |
| cg04923845 | 30.43  | 15.30 | 4.68E-02 | 36.17  | 21.20 | 8.80E-02 | 147.06  | 90.94  | 1.06E-01 | 39.20  | 46.93 | 4.04E-01 | 9.44   | 26.07 | 7.17E-01 |
| cg03369196 | 8.70   | 4.38  | 4.68E-02 | 10.02  | 8.45  | 2.35E-01 | 21.17   | 14.07  | 1.32E-01 | 5.89   | 6.21  | 3.43E-01 | 7.53   | 11.79 | 5.23E-01 |
| cg21631753 | 27.25  | 13.71 | 4.68E-02 | 22.55  | 18.09 | 2.13E-01 | 52.37   | 47.50  | 2.70E-01 | -1.92  | 47.05 | 9.67E-01 | 39.20  | 26.99 | 1.46E-01 |
| cg24841318 | -23.55 | 11.85 | 4.68E-02 | -22.84 | 14.68 | 1.20E-01 | -24.07  | 51.75  | 6.42E-01 | 23.08  | 68.15 | 7.35E-01 | -30.48 | 22.96 | 1.84E-01 |
| cg09934381 | -10.74 | 5.40  | 4.68E-02 | -7.16  | 8.52  | 4.01E-01 | -26.74  | 11.35  | 1.85E-02 | -2.14  | 5.91  | 7.18E-01 | -18.46 | 10.61 | 8.19E-02 |
| cg05702778 | 13.84  | 6.96  | 4.68E-02 | 15.69  | 16.66 | 3.46E-01 | 1.60    | 38.90  | 9.67E-01 | 9.78   | 8.78  | 2.65E-01 | 29.78  | 17.16 | 8.27E-02 |
| cg01839954 | 14.96  | 7.52  | 4.68E-02 | -3.97  | 16.69 | 8.12E-01 | 7.30    | 47.48  | 8.78E-01 | 21.31  | 9.02  | 1.81E-02 | 9.85   | 27.47 | 7.20E-01 |
| cg00701755 | -50.33 | 25.31 | 4.68E-02 | -41.07 | 32.68 | 2.09E-01 | 179.65  | 150.93 | 2.34E-01 | -94.74 | 59.00 | 1.08E-01 | -66.50 | 52.61 | 2.06E-01 |
| cg14080925 | 18.90  | 9.51  | 4.68E-02 | 27.10  | 17.11 | 1.13E-01 | 16.32   | 20.31  | 4.22E-01 | 10.38  | 17.89 | 5.62E-01 | 21.22  | 21.80 | 3.30E-01 |
| cg25710178 | 22.99  | 11.56 | 4.68E-02 | 39.34  | 37.62 | 2.96E-01 | -93.57  | 218.84 | 6.69E-01 | 20.67  | 12.67 | 1.03E-01 | 33.09  | 43.61 | 4.48E-01 |
| cg09750599 | -14.61 | 7.35  | 4.68E-02 | -39.60 | 14.74 | 7.20E-03 | -4.51   | 21.04  | 8.30E-01 | -9.00  | 6.81  | 1.86E-01 | -8.78  | 17.96 | 6.25E-01 |
| cg26323077 | 19.04  | 9.57  | 4.68E-02 | 29.36  | 16.41 | 7.35E-02 | -8.61   | 27.96  | 7.58E-01 | 28.85  | 15.40 | 6.11E-02 | -7.09  | 24.27 | 7.70E-01 |
| cg09077443 | -12.17 | 6.12  | 4.68E-02 | -27.35 | 14.46 | 5.86E-02 | 14.12   | 26.72  | 5.97E-01 | -10.03 | 7.45  | 1.78E-01 | -13.30 | 20.09 | 5.08E-01 |
| cg24383018 | 24.91  | 12.53 | 4.68E-02 | 35.74  | 17.52 | 4.14E-02 | 19.78   | 29.06  | 4.96E-01 | 10.36  | 44.72 | 8.17E-01 | 9.59   | 26.43 | 7.17E-01 |

|            |        |       |          |        |       |          |         |        |          |        |       |          |        |       |          |
|------------|--------|-------|----------|--------|-------|----------|---------|--------|----------|--------|-------|----------|--------|-------|----------|
| cg20346726 | 25.71  | 12.93 | 4.68E-02 | 38.09  | 20.78 | 6.68E-02 | -16.30  | 38.29  | 6.70E-01 | 50.48  | 31.40 | 1.08E-01 | 12.92  | 22.55 | 5.66E-01 |
| cg07434447 | 32.87  | 16.54 | 4.68E-02 | 62.93  | 46.20 | 1.73E-01 | -121.12 | 152.65 | 4.28E-01 | 31.89  | 18.71 | 8.83E-02 | 16.76  | 58.72 | 7.75E-01 |
| cg19095187 | 9.73   | 4.90  | 4.68E-02 | 8.28   | 8.98  | 3.56E-01 | 18.11   | 11.90  | 1.28E-01 | 3.08   | 9.51  | 7.46E-01 | 12.63  | 9.45  | 1.81E-01 |
| cg26593722 | -59.03 | 29.69 | 4.68E-02 | -48.66 | 37.88 | 1.99E-01 | 85.84   | 176.03 | 6.26E-01 | -99.41 | 68.32 | 1.46E-01 | -76.03 | 72.37 | 2.93E-01 |
| cg03634650 | -12.42 | 6.25  | 4.68E-02 | -2.47  | 13.90 | 8.59E-01 | -11.06  | 22.35  | 6.21E-01 | -18.41 | 7.69  | 1.66E-02 | 18.82  | 25.72 | 4.64E-01 |
| cg07899263 | -9.34  | 4.70  | 4.68E-02 | -16.14 | 9.18  | 7.89E-02 | 9.20    | 11.63  | 4.29E-01 | -10.72 | 5.88  | 6.82E-02 | -14.90 | 14.95 | 3.19E-01 |
| cg03782861 | -5.36  | 2.70  | 4.68E-02 | -3.81  | 4.46  | 3.92E-01 | -6.81   | 5.56   | 2.21E-01 | -10.77 | 5.90  | 6.82E-02 | -0.60  | 6.20  | 9.23E-01 |
| cg00516870 | 17.65  | 8.88  | 4.68E-02 | 38.90  | 16.46 | 1.81E-02 | 46.42   | 34.95  | 1.84E-01 | 8.08   | 7.42  | 2.77E-01 | 10.42  | 23.57 | 6.58E-01 |
| cg09144707 | 7.06   | 3.55  | 4.68E-02 | 2.90   | 5.25  | 5.81E-01 | 7.30    | 10.12  | 4.71E-01 | 12.26  | 8.24  | 1.37E-01 | 10.87  | 7.31  | 1.37E-01 |
| cg18241094 | 18.74  | 9.43  | 4.68E-02 | 12.59  | 19.40 | 5.16E-01 | -0.65   | 20.50  | 9.75E-01 | 30.97  | 14.01 | 2.71E-02 | 18.92  | 29.87 | 5.26E-01 |
| cg25119219 | -19.72 | 9.92  | 4.68E-02 | -13.18 | 36.63 | 7.19E-01 | 57.50   | 125.48 | 6.47E-01 | -16.83 | 10.69 | 1.15E-01 | -77.75 | 40.68 | 5.60E-02 |
| cg12705762 | 22.47  | 11.30 | 4.68E-02 | 21.35  | 19.15 | 2.65E-01 | -0.64   | 35.95  | 9.86E-01 | 44.11  | 23.88 | 6.48E-02 | 15.86  | 19.72 | 4.21E-01 |
| cg05409047 | 15.65  | 7.87  | 4.69E-02 | 19.59  | 14.84 | 1.87E-01 | 18.45   | 13.13  | 1.60E-01 | -3.95  | 15.87 | 8.04E-01 | 39.45  | 23.37 | 9.14E-02 |
| cg26866168 | -4.64  | 2.33  | 4.69E-02 | -5.12  | 3.40  | 1.32E-01 | -6.42   | 5.01   | 2.00E-01 | 7.38   | 8.42  | 3.81E-01 | -5.94  | 4.82  | 2.17E-01 |
| cg18511011 | -10.83 | 5.45  | 4.69E-02 | -7.59  | 8.60  | 3.77E-01 | -4.30   | 14.94  | 7.74E-01 | -14.36 | 11.99 | 2.31E-01 | -16.41 | 10.72 | 1.26E-01 |
| cg02076755 | -34.53 | 17.37 | 4.69E-02 | -17.13 | 23.98 | 4.75E-01 | -61.93  | 43.97  | 1.59E-01 | -36.24 | 43.33 | 4.03E-01 | -63.39 | 43.63 | 1.46E-01 |
| cg04172748 | 39.08  | 19.66 | 4.69E-02 | 32.88  | 23.18 | 1.56E-01 | -66.82  | 134.99 | 6.21E-01 | 14.09  | 93.23 | 8.80E-01 | 75.48  | 42.42 | 7.52E-02 |
| cg07236221 | -17.35 | 8.73  | 4.69E-02 | -16.56 | 18.56 | 3.72E-01 | -8.47   | 36.71  | 8.18E-01 | -12.69 | 11.21 | 2.58E-01 | -47.61 | 25.65 | 6.35E-02 |
| cg18089380 | 16.04  | 8.07  | 4.69E-02 | 28.57  | 18.34 | 1.19E-01 | -39.04  | 42.66  | 3.60E-01 | 14.84  | 9.95  | 1.36E-01 | 18.97  | 23.97 | 4.29E-01 |
| cg03202732 | 7.32   | 3.68  | 4.69E-02 | 8.83   | 4.79  | 6.52E-02 | 6.94    | 8.43   | 4.11E-01 | 4.96   | 12.78 | 6.98E-01 | 2.68   | 10.07 | 7.90E-01 |
| cg05131488 | -7.55  | 3.80  | 4.69E-02 | -8.50  | 8.41  | 3.12E-01 | 3.82    | 12.90  | 7.67E-01 | -9.18  | 5.01  | 6.71E-02 | -6.48  | 10.32 | 5.30E-01 |
| cg18031747 | 12.76  | 6.42  | 4.69E-02 | 12.66  | 6.55  | 5.31E-02 | 7.92    | 126.34 | 9.50E-01 | 71.75  | 69.87 | 3.04E-01 | -1.62  | 38.85 | 9.67E-01 |
| cg09251400 | -10.00 | 5.03  | 4.69E-02 | -14.15 | 13.48 | 2.94E-01 | -20.09  | 16.08  | 2.12E-01 | -5.78  | 6.21  | 3.52E-01 | -21.21 | 15.38 | 1.68E-01 |
| cg06984073 | 15.63  | 7.86  | 4.69E-02 | 17.10  | 11.93 | 1.52E-01 | 17.83   | 23.26  | 4.43E-01 | 18.19  | 24.58 | 4.59E-01 | 12.33  | 13.31 | 3.55E-01 |
| cg04833034 | -9.12  | 4.59  | 4.69E-02 | -10.79 | 7.17  | 1.32E-01 | -17.42  | 12.99  | 1.80E-01 | -3.84  | 9.15  | 6.75E-01 | -7.30  | 9.94  | 4.62E-01 |
| cg15724534 | 4.09   | 2.06  | 4.69E-02 | 4.31   | 3.04  | 1.56E-01 | 11.36   | 6.46   | 7.88E-02 | 3.84   | 3.60  | 2.86E-01 | -2.70  | 6.19  | 6.62E-01 |
| cg06493994 | 16.32  | 8.21  | 4.69E-02 | 25.46  | 11.81 | 3.12E-02 | 24.47   | 21.45  | 2.54E-01 | 22.46  | 11.33 | 4.75E-02 | -10.11 | 15.01 | 5.00E-01 |
| cg27086020 | 19.51  | 9.82  | 4.69E-02 | 8.85   | 16.10 | 5.82E-01 | -47.98  | 60.09  | 4.25E-01 | 26.26  | 14.01 | 6.09E-02 | 41.71  | 29.54 | 1.58E-01 |
| cg20761322 | 11.23  | 5.65  | 4.69E-02 | 15.41  | 8.49  | 6.95E-02 | 24.90   | 16.04  | 1.21E-01 | 10.96  | 22.18 | 6.21E-01 | 1.65   | 9.30  | 8.59E-01 |
| cg04020079 | 14.30  | 7.20  | 4.69E-02 | 18.52  | 9.13  | 4.25E-02 | -6.82   | 11.92  | 5.67E-01 | 25.41  | 16.55 | 1.25E-01 | 23.09  | 12.27 | 5.99E-02 |
| cg04861974 | -7.70  | 3.87  | 4.69E-02 | -10.12 | 7.27  | 1.64E-01 | -22.18  | 15.03  | 1.40E-01 | -4.91  | 5.35  | 3.59E-01 | -6.20  | 10.91 | 5.70E-01 |
| cg01529552 | 24.13  | 12.14 | 4.69E-02 | 21.29  | 24.61 | 3.87E-01 | 75.47   | 53.53  | 1.59E-01 | 23.52  | 15.94 | 1.40E-01 | 11.36  | 34.33 | 7.41E-01 |
| cg01761552 | 10.46  | 5.26  | 4.69E-02 | 13.08  | 14.50 | 3.67E-01 | 2.61    | 24.03  | 9.13E-01 | 10.53  | 6.03  | 8.06E-02 | 10.00  | 21.84 | 6.47E-01 |
| cg00330059 | -8.62  | 4.34  | 4.69E-02 | -11.16 | 5.65  | 4.82E-02 | -11.19  | 7.35   | 1.28E-01 | -18.33 | 10.69 | 8.64E-02 | 5.06   | 8.21  | 5.38E-01 |
| cg27398547 | -6.83  | 3.44  | 4.69E-02 | -9.49  | 4.44  | 3.26E-02 | 4.59    | 6.54   | 4.83E-01 | -7.22  | 7.35  | 3.26E-01 | -11.93 | 5.45  | 2.85E-02 |

|            |        |       |          |        |       |          |         |        |          |        |       |          |        |       |          |
|------------|--------|-------|----------|--------|-------|----------|---------|--------|----------|--------|-------|----------|--------|-------|----------|
| cg03897241 | 14.24  | 7.17  | 4.69E-02 | 24.80  | 17.89 | 1.66E-01 | -28.70  | 31.58  | 3.63E-01 | 15.93  | 8.49  | 6.05E-02 | 5.09   | 26.06 | 8.45E-01 |
| cg04062190 | -8.37  | 4.21  | 4.69E-02 | -11.70 | 8.45  | 1.66E-01 | -2.05   | 17.01  | 9.04E-01 | -8.33  | 5.71  | 1.44E-01 | -5.48  | 11.01 | 6.19E-01 |
| cg05939089 | -11.04 | 5.56  | 4.69E-02 | -19.62 | 10.16 | 5.34E-02 | -12.58  | 13.40  | 3.48E-01 | -0.21  | 9.37  | 9.82E-01 | -16.55 | 13.21 | 2.10E-01 |
| cg12084750 | -10.64 | 5.36  | 4.69E-02 | -21.86 | 8.10  | 6.93E-03 | 1.33    | 11.47  | 9.08E-01 | -6.04  | 15.01 | 6.87E-01 | -6.53  | 9.17  | 4.77E-01 |
| cg26320696 | 13.53  | 6.81  | 4.69E-02 | 28.00  | 12.03 | 2.00E-02 | 16.03   | 19.19  | 4.04E-01 | 8.43   | 13.49 | 5.32E-01 | 1.34   | 12.45 | 9.14E-01 |
| cg13382000 | 52.93  | 26.64 | 4.69E-02 | 130.88 | 51.63 | 1.12E-02 | -59.64  | 209.00 | 7.75E-01 | 28.46  | 20.27 | 1.60E-01 | 60.84  | 68.66 | 3.76E-01 |
| cg19867517 | 38.25  | 19.25 | 4.69E-02 | 73.24  | 50.33 | 1.46E-01 | -326.34 | 235.90 | 1.67E-01 | 33.63  | 22.63 | 1.37E-01 | 43.54  | 54.77 | 4.27E-01 |
| cg08365802 | -12.40 | 6.24  | 4.69E-02 | -10.15 | 11.45 | 3.75E-01 | 0.36    | 21.96  | 9.87E-01 | -12.25 | 8.61  | 1.55E-01 | -30.76 | 20.04 | 1.25E-01 |
| cg04899753 | 8.55   | 4.30  | 4.69E-02 | 2.09   | 5.83  | 7.20E-01 | 9.39    | 6.97   | 1.78E-01 | 24.99  | 10.18 | 1.41E-02 | 6.49   | 8.64  | 4.52E-01 |
| cg24759654 | -7.98  | 4.02  | 4.69E-02 | -7.87  | 7.45  | 2.91E-01 | -15.97  | 11.02  | 1.47E-01 | -4.96  | 6.69  | 4.58E-01 | -8.28  | 8.66  | 3.39E-01 |
| cg21904441 | -8.59  | 4.32  | 4.69E-02 | -8.16  | 8.03  | 3.09E-01 | -2.65   | 7.90   | 7.37E-01 | -10.18 | 7.86  | 1.95E-01 | -21.65 | 13.13 | 9.91E-02 |
| cg02524983 | -9.39  | 4.72  | 4.69E-02 | -9.73  | 7.06  | 1.68E-01 | -0.59   | 17.51  | 9.73E-01 | 0.83   | 14.59 | 9.55E-01 | -13.55 | 7.72  | 7.94E-02 |
| cg07666579 | 14.17  | 7.13  | 4.69E-02 | 7.40   | 18.97 | 6.97E-01 | -15.23  | 54.32  | 7.79E-01 | 18.41  | 8.07  | 2.25E-02 | -16.38 | 29.01 | 5.72E-01 |
| cg14077232 | -13.47 | 6.78  | 4.69E-02 | -19.96 | 12.62 | 1.14E-01 | -16.55  | 30.57  | 5.88E-01 | -17.06 | 9.39  | 6.92E-02 | 14.30  | 18.10 | 4.30E-01 |
| cg21407906 | 7.74   | 3.89  | 4.69E-02 | 6.34   | 5.74  | 2.69E-01 | 3.36    | 8.75   | 7.01E-01 | 17.32  | 11.59 | 1.35E-01 | 9.62   | 8.16  | 2.38E-01 |
| cg01452847 | 12.31  | 6.19  | 4.69E-02 | 21.25  | 12.00 | 7.65E-02 | -3.23   | 17.38  | 8.53E-01 | 18.17  | 10.71 | 8.96E-02 | 3.56   | 11.88 | 7.64E-01 |
| cg26678012 | -27.81 | 14.00 | 4.69E-02 | -24.95 | 22.92 | 2.76E-01 | -223.88 | 124.30 | 7.17E-02 | -26.28 | 19.77 | 1.84E-01 | -22.04 | 41.68 | 5.97E-01 |
| cg09557972 | -38.30 | 19.28 | 4.69E-02 | -23.91 | 23.38 | 3.06E-01 | -122.91 | 48.73  | 1.17E-02 | -33.71 | 41.68 | 4.19E-01 | -18.66 | 36.21 | 6.06E-01 |
| cg18269526 | 27.16  | 13.67 | 4.69E-02 | 15.54  | 22.86 | 4.97E-01 | 248.98  | 148.27 | 9.31E-02 | 16.65  | 24.56 | 4.98E-01 | 41.71  | 22.30 | 6.14E-02 |
| cg02748316 | -19.92 | 10.03 | 4.70E-02 | -30.22 | 30.07 | 3.15E-01 | 182.96  | 130.44 | 1.61E-01 | -19.85 | 11.26 | 7.78E-02 | -21.13 | 33.52 | 5.29E-01 |
| cg12789472 | -10.48 | 5.28  | 4.70E-02 | -18.52 | 10.38 | 7.42E-02 | -2.34   | 13.73  | 8.65E-01 | -7.50  | 7.75  | 3.33E-01 | -14.40 | 14.64 | 3.25E-01 |
| cg17859187 | -19.12 | 9.62  | 4.70E-02 | 7.39   | 18.10 | 6.83E-01 | -37.38  | 20.90  | 7.37E-02 | -22.45 | 29.10 | 4.40E-01 | -26.12 | 14.01 | 6.23E-02 |
| cg12212555 | -46.81 | 23.56 | 4.70E-02 | -16.92 | 21.38 | 4.29E-01 | -189.94 | 71.06  | 7.52E-03 | -47.30 | 46.39 | 3.08E-01 | -41.96 | 25.72 | 1.03E-01 |
| cg23478354 | -28.37 | 14.28 | 4.70E-02 | -2.04  | 28.82 | 9.43E-01 | -122.20 | 138.70 | 3.78E-01 | -21.84 | 11.04 | 4.79E-02 | -74.41 | 30.59 | 1.50E-02 |
| cg13858974 | -6.71  | 3.38  | 4.70E-02 | -8.13  | 5.74  | 1.57E-01 | -1.52   | 11.54  | 8.96E-01 | -6.81  | 5.40  | 2.07E-01 | -6.25  | 8.04  | 4.37E-01 |
| cg04069099 | -33.27 | 16.75 | 4.70E-02 | -51.37 | 29.24 | 7.89E-02 | -105.12 | 84.69  | 2.14E-01 | -12.87 | 8.33  | 1.22E-01 | -68.15 | 37.82 | 7.16E-02 |
| cg18119485 | -12.79 | 6.44  | 4.70E-02 | -21.63 | 11.81 | 6.69E-02 | -17.34  | 21.39  | 4.18E-01 | -11.65 | 9.13  | 2.02E-01 | 8.70   | 18.95 | 6.46E-01 |
| cg20039443 | 6.62   | 3.33  | 4.70E-02 | 6.65   | 4.19  | 1.13E-01 | 9.82    | 8.46   | 2.46E-01 | 9.59   | 11.50 | 4.05E-01 | 0.68   | 9.27  | 9.41E-01 |
| cg05814027 | -28.23 | 14.21 | 4.70E-02 | -28.31 | 15.61 | 6.98E-02 | -11.77  | 68.97  | 8.65E-01 | 25.26  | 73.77 | 7.32E-01 | -56.72 | 46.86 | 2.26E-01 |
| cg03045169 | 29.72  | 14.96 | 4.70E-02 | 32.88  | 18.47 | 7.50E-02 | 6.40    | 90.65  | 9.44E-01 | 12.48  | 37.05 | 7.36E-01 | 38.70  | 38.21 | 3.11E-01 |
| cg21931676 | -24.09 | 12.13 | 4.70E-02 | -73.59 | 39.84 | 6.47E-02 | -17.13  | 148.10 | 9.08E-01 | -21.72 | 13.49 | 1.07E-01 | 4.32   | 39.93 | 9.14E-01 |
| cg00977403 | -4.41  | 2.22  | 4.70E-02 | -1.91  | 3.16  | 5.44E-01 | -6.45   | 4.40   | 1.42E-01 | -7.26  | 6.99  | 2.99E-01 | -7.26  | 5.74  | 2.06E-01 |
| cg23418591 | -11.97 | 6.03  | 4.70E-02 | -12.53 | 8.53  | 1.42E-01 | -23.12  | 16.09  | 1.51E-01 | 0.05   | 17.70 | 9.98E-01 | -10.14 | 12.19 | 4.06E-01 |
| cg24266670 | 14.81  | 7.46  | 4.70E-02 | 25.98  | 16.75 | 1.21E-01 | -2.92   | 21.55  | 8.92E-01 | 9.54   | 10.72 | 3.74E-01 | 27.21  | 16.74 | 1.04E-01 |
| cg25403488 | 12.08  | 6.08  | 4.70E-02 | 9.24   | 15.32 | 5.46E-01 | 21.77   | 22.73  | 3.38E-01 | 10.67  | 7.18  | 1.37E-01 | 26.15  | 26.11 | 3.17E-01 |

|            |        |       |          |        |       |          |         |        |          |        |       |          |        |       |          |
|------------|--------|-------|----------|--------|-------|----------|---------|--------|----------|--------|-------|----------|--------|-------|----------|
| cg26052885 | -10.63 | 5.35  | 4.70E-02 | -8.35  | 11.41 | 4.64E-01 | -7.24   | 18.67  | 6.98E-01 | -14.73 | 7.31  | 4.40E-02 | -1.90  | 13.28 | 8.86E-01 |
| cg18394216 | 20.11  | 10.12 | 4.70E-02 | 15.25  | 26.96 | 5.72E-01 | -9.85   | 51.56  | 8.48E-01 | 25.05  | 12.30 | 4.16E-02 | 9.49   | 26.82 | 7.23E-01 |
| cg13107768 | 12.73  | 6.41  | 4.70E-02 | 9.84   | 10.24 | 3.37E-01 | 12.41   | 18.27  | 4.97E-01 | 35.20  | 15.35 | 2.18E-02 | 3.90   | 11.50 | 7.34E-01 |
| cg19779965 | -7.07  | 3.56  | 4.70E-02 | -9.26  | 6.48  | 1.53E-01 | 7.31    | 9.02   | 4.18E-01 | -11.23 | 4.78  | 1.87E-02 | -5.43  | 8.26  | 5.11E-01 |
| cg03764818 | 16.03  | 8.07  | 4.70E-02 | 18.84  | 14.17 | 1.84E-01 | 28.04   | 18.18  | 1.23E-01 | 0.30   | 13.21 | 9.82E-01 | 40.32  | 24.75 | 1.03E-01 |
| cg22091236 | 6.28   | 3.16  | 4.70E-02 | 6.43   | 4.12  | 1.19E-01 | 10.03   | 7.88   | 2.03E-01 | 4.59   | 8.58  | 5.93E-01 | 2.28   | 9.30  | 8.07E-01 |
| cg17408663 | -16.99 | 8.55  | 4.70E-02 | -11.29 | 19.71 | 5.67E-01 | -5.64   | 125.83 | 9.64E-01 | -18.04 | 9.85  | 6.71E-02 | -23.38 | 37.24 | 5.30E-01 |
| cg00209923 | 7.12   | 3.59  | 4.70E-02 | 11.69  | 6.81  | 8.61E-02 | 1.74    | 10.19  | 8.64E-01 | 5.71   | 5.03  | 2.56E-01 | 8.42   | 11.92 | 4.80E-01 |
| cg01464186 | -6.95  | 3.50  | 4.70E-02 | -14.51 | 8.39  | 8.38E-02 | -0.57   | 15.72  | 9.71E-01 | -4.00  | 4.30  | 3.52E-01 | -15.33 | 10.35 | 1.39E-01 |
| cg15834072 | 6.62   | 3.33  | 4.70E-02 | 11.13  | 6.38  | 8.10E-02 | 13.05   | 7.43   | 7.92E-02 | 3.61   | 7.68  | 6.39E-01 | 0.83   | 5.73  | 8.84E-01 |
| cg10437415 | 19.02  | 9.58  | 4.70E-02 | 23.44  | 17.28 | 1.75E-01 | 64.82   | 42.07  | 1.23E-01 | 12.56  | 13.11 | 3.38E-01 | 16.44  | 29.28 | 5.74E-01 |
| cg12943539 | 24.32  | 12.24 | 4.70E-02 | 39.83  | 36.13 | 2.70E-01 | -226.85 | 153.32 | 1.39E-01 | 23.39  | 13.60 | 8.55E-02 | 32.73  | 46.83 | 4.85E-01 |
| cg17097992 | -37.61 | 18.94 | 4.70E-02 | 13.98  | 51.37 | 7.86E-01 | 237.80  | 255.08 | 3.51E-01 | -44.72 | 21.49 | 3.74E-02 | -74.47 | 66.30 | 2.61E-01 |
| cg14654533 | 10.31  | 5.19  | 4.70E-02 | 18.96  | 6.85  | 5.61E-03 | 1.62    | 9.18   | 8.60E-01 | 19.90  | 9.44  | 3.51E-02 | 1.71   | 6.50  | 7.93E-01 |
| cg10891959 | -21.21 | 10.68 | 4.70E-02 | -20.51 | 18.22 | 2.60E-01 | -31.36  | 38.35  | 4.13E-01 | -8.46  | 16.18 | 6.01E-01 | -55.97 | 28.16 | 4.68E-02 |
| cg20618750 | 38.94  | 19.61 | 4.70E-02 | 25.08  | 26.23 | 3.39E-01 | 138.73  | 124.62 | 2.66E-01 | 111.00 | 62.58 | 7.61E-02 | 33.28  | 34.76 | 3.38E-01 |
| cg25535873 | -15.61 | 7.86  | 4.70E-02 | -15.62 | 15.91 | 3.26E-01 | -0.75   | 19.75  | 9.70E-01 | -24.25 | 11.93 | 4.21E-02 | -7.04  | 19.47 | 7.18E-01 |
| cg13652841 | -15.47 | 7.79  | 4.70E-02 | -30.39 | 13.47 | 2.40E-02 | 0.62    | 15.05  | 9.67E-01 | -13.85 | 16.61 | 4.04E-01 | -13.64 | 18.50 | 4.61E-01 |
| cg03209251 | 17.51  | 8.82  | 4.70E-02 | 33.28  | 19.77 | 9.23E-02 | 0.98    | 18.91  | 9.59E-01 | 15.80  | 13.09 | 2.27E-01 | 26.93  | 24.42 | 2.70E-01 |
| cg26262442 | 5.33   | 2.68  | 4.70E-02 | 2.38   | 3.63  | 5.12E-01 | 9.56    | 4.91   | 5.12E-02 | 5.58   | 13.88 | 6.88E-01 | 8.27   | 7.89  | 2.95E-01 |
| cg10573932 | 10.84  | 5.46  | 4.70E-02 | 11.70  | 7.06  | 9.76E-02 | 11.95   | 12.43  | 3.37E-01 | 24.78  | 11.34 | 2.88E-02 | -4.97  | 10.97 | 6.51E-01 |
| cg17618872 | -7.75  | 3.90  | 4.71E-02 | -11.52 | 5.84  | 4.85E-02 | -8.50   | 9.31   | 3.61E-01 | 4.77   | 8.32  | 5.66E-01 | -13.25 | 9.37  | 1.57E-01 |
| cg20063095 | 6.24   | 3.14  | 4.71E-02 | 6.34   | 4.15  | 1.26E-01 | 13.44   | 7.93   | 9.01E-02 | 5.52   | 8.63  | 5.22E-01 | -1.75  | 8.48  | 8.37E-01 |
| cg07937270 | 17.17  | 8.64  | 4.71E-02 | 32.90  | 25.89 | 2.04E-01 | 61.22   | 33.35  | 6.64E-02 | 9.79   | 9.95  | 3.25E-01 | 30.13  | 33.65 | 3.71E-01 |
| cg03963198 | 16.96  | 8.54  | 4.71E-02 | 33.20  | 17.40 | 5.64E-02 | 16.22   | 25.23  | 5.20E-01 | 22.57  | 12.54 | 7.17E-02 | -7.39  | 16.75 | 6.59E-01 |
| cg15416877 | 12.49  | 6.29  | 4.71E-02 | 19.61  | 10.18 | 5.40E-02 | 1.30    | 19.77  | 9.48E-01 | 23.23  | 12.45 | 6.22E-02 | -1.76  | 11.47 | 8.78E-01 |
| cg07747616 | 8.75   | 4.41  | 4.71E-02 | 11.59  | 6.87  | 9.18E-02 | 11.30   | 9.40   | 2.29E-01 | 6.88   | 9.95  | 4.90E-01 | 0.91   | 10.57 | 9.31E-01 |
| cg10314566 | 20.18  | 10.17 | 4.71E-02 | -0.38  | 20.98 | 9.86E-01 | 11.07   | 18.84  | 5.57E-01 | 23.58  | 13.57 | 8.23E-02 | 62.22  | 28.20 | 2.73E-02 |
| cg11511795 | 6.49   | 3.27  | 4.71E-02 | 4.23   | 5.46  | 4.38E-01 | 8.19    | 7.99   | 3.05E-01 | 5.10   | 6.37  | 4.24E-01 | 10.67  | 7.09  | 1.33E-01 |
| cg24185447 | -11.17 | 5.62  | 4.71E-02 | -4.02  | 15.44 | 7.94E-01 | 1.33    | 26.07  | 9.59E-01 | -12.56 | 6.51  | 5.37E-02 | -17.78 | 20.63 | 3.89E-01 |
| cg26889953 | 8.05   | 4.05  | 4.71E-02 | 9.18   | 5.25  | 8.03E-02 | 12.74   | 11.46  | 2.66E-01 | 8.73   | 10.71 | 4.15E-01 | -2.00  | 11.02 | 8.56E-01 |
| cg13599649 | 22.48  | 11.32 | 4.71E-02 | -3.19  | 18.93 | 8.66E-01 | 8.41    | 19.95  | 6.73E-01 | 31.57  | 9.64  | 1.06E-03 | 60.85  | 28.21 | 3.10E-02 |
| cg26446350 | 18.26  | 9.19  | 4.71E-02 | 47.20  | 18.86 | 1.23E-02 | 10.67   | 21.90  | 6.26E-01 | 11.96  | 12.52 | 3.39E-01 | 1.47   | 24.85 | 9.53E-01 |
| cg00373707 | 12.86  | 6.48  | 4.71E-02 | 22.10  | 12.81 | 8.44E-02 | 5.55    | 18.92  | 7.69E-01 | 15.04  | 11.11 | 1.76E-01 | 5.03   | 12.10 | 6.78E-01 |
| cg03408433 | 13.48  | 6.79  | 4.71E-02 | 15.63  | 10.66 | 1.43E-01 | 12.07   | 17.73  | 4.96E-01 | 20.52  | 18.73 | 2.73E-01 | 8.45   | 12.07 | 4.84E-01 |

|            |        |       |          |        |       |          |         |        |          |        |       |          |        |       |          |
|------------|--------|-------|----------|--------|-------|----------|---------|--------|----------|--------|-------|----------|--------|-------|----------|
| cg08851723 | 34.13  | 17.19 | 4.71E-02 | 15.79  | 24.40 | 5.18E-01 | 69.32   | 58.80  | 2.38E-01 | 53.32  | 41.81 | 2.02E-01 | 45.52  | 34.42 | 1.86E-01 |
| cg15904939 | 14.77  | 7.44  | 4.71E-02 | 17.96  | 13.13 | 1.71E-01 | 8.95    | 14.80  | 5.46E-01 | 20.26  | 13.55 | 1.35E-01 | 5.07   | 21.10 | 8.10E-01 |
| cg00701064 | 8.11   | 4.08  | 4.71E-02 | 12.31  | 5.70  | 3.09E-02 | 3.45    | 10.53  | 7.43E-01 | 9.05   | 9.67  | 3.49E-01 | -2.09  | 10.24 | 8.38E-01 |
| cg27440523 | 16.83  | 8.47  | 4.71E-02 | 32.31  | 19.35 | 9.49E-02 | -10.50  | 40.24  | 7.94E-01 | 10.04  | 10.57 | 3.42E-01 | 38.49  | 24.43 | 1.15E-01 |
| cg11731671 | 6.50   | 3.28  | 4.71E-02 | 3.41   | 3.44  | 3.22E-01 | 10.43   | 4.72   | 2.70E-02 | 16.03  | 6.28  | 1.06E-02 | -0.69  | 5.10  | 8.92E-01 |
| cg13588403 | 7.18   | 3.62  | 4.71E-02 | 10.97  | 4.96  | 2.71E-02 | 2.50    | 8.42   | 7.67E-01 | 16.68  | 12.83 | 1.93E-01 | -2.09  | 7.98  | 7.93E-01 |
| cg00324097 | -7.40  | 3.73  | 4.71E-02 | -5.28  | 4.92  | 2.84E-01 | -12.05  | 10.09  | 2.32E-01 | -15.51 | 9.80  | 1.14E-01 | -3.34  | 9.81  | 7.34E-01 |
| cg18003762 | 40.27  | 20.29 | 4.71E-02 | 111.77 | 56.66 | 4.85E-02 | -202.01 | 214.63 | 3.47E-01 | 38.67  | 18.09 | 3.25E-02 | 7.89   | 48.04 | 8.70E-01 |
| cg16732616 | 15.69  | 7.90  | 4.71E-02 | -17.77 | 41.32 | 6.67E-01 | -38.04  | 68.58  | 5.79E-01 | 19.36  | 8.59  | 2.42E-02 | 4.35   | 24.57 | 8.59E-01 |
| cg09628195 | 20.00  | 10.08 | 4.71E-02 | 23.01  | 14.63 | 1.16E-01 | -6.69   | 26.70  | 8.02E-01 | 15.96  | 33.11 | 6.30E-01 | 29.44  | 18.68 | 1.15E-01 |
| cg03687241 | -11.00 | 5.54  | 4.71E-02 | -7.27  | 15.58 | 6.41E-01 | -3.88   | 32.52  | 9.05E-01 | -12.59 | 6.44  | 5.04E-02 | -6.15  | 17.24 | 7.21E-01 |
| cg04781080 | -8.43  | 4.25  | 4.71E-02 | -8.07  | 5.49  | 1.42E-01 | -3.72   | 12.61  | 7.68E-01 | -13.79 | 12.48 | 2.69E-01 | -9.20  | 10.25 | 3.70E-01 |
| cg00843561 | 31.17  | 15.70 | 4.71E-02 | 35.22  | 19.02 | 6.41E-02 | -38.74  | 49.80  | 4.37E-01 | 46.83  | 69.74 | 5.02E-01 | 51.36  | 38.28 | 1.80E-01 |
| cg23944251 | 15.62  | 7.87  | 4.71E-02 | 37.36  | 10.41 | 3.33E-04 | 15.07   | 14.21  | 2.89E-01 | 7.30   | 8.49  | 3.90E-01 | 3.96   | 10.51 | 7.07E-01 |
| cg00591153 | 21.68  | 10.92 | 4.71E-02 | 19.24  | 13.01 | 1.39E-01 | 14.98   | 36.24  | 6.79E-01 | 98.52  | 45.97 | 3.21E-02 | 11.00  | 24.33 | 6.51E-01 |
| cg01452911 | -10.23 | 5.15  | 4.72E-02 | 0.29   | 12.27 | 9.81E-01 | 2.71    | 28.13  | 9.23E-01 | -11.47 | 6.24  | 6.62E-02 | -23.58 | 15.66 | 1.32E-01 |
| cg11467291 | 17.74  | 8.94  | 4.72E-02 | 4.33   | 14.35 | 7.63E-01 | 27.60   | 18.14  | 1.28E-01 | 26.46  | 18.61 | 1.55E-01 | 23.55  | 24.05 | 3.27E-01 |
| cg24807547 | 7.43   | 3.74  | 4.72E-02 | 6.98   | 5.21  | 1.81E-01 | 15.01   | 8.55   | 7.92E-02 | 9.16   | 9.61  | 3.41E-01 | -3.08  | 9.97  | 7.58E-01 |
| cg03705962 | -7.07  | 3.56  | 4.72E-02 | -8.08  | 9.61  | 4.00E-01 | -16.84  | 20.98  | 4.22E-01 | -4.44  | 4.15  | 2.84E-01 | -22.56 | 11.40 | 4.77E-02 |
| cg18347010 | 8.36   | 4.21  | 4.72E-02 | 11.63  | 5.83  | 4.62E-02 | 13.90   | 9.44   | 1.41E-01 | -5.60  | 12.99 | 6.66E-01 | 0.70   | 10.06 | 9.45E-01 |
| cg22480875 | 2.68   | 1.35  | 4.72E-02 | 3.49   | 1.92  | 6.98E-02 | 2.27    | 2.87   | 4.29E-01 | 0.75   | 3.52  | 8.32E-01 | 2.50   | 3.59  | 4.87E-01 |
| cg20543571 | 16.34  | 8.23  | 4.72E-02 | 28.35  | 18.22 | 1.20E-01 | 27.10   | 24.05  | 2.60E-01 | 7.60   | 10.68 | 4.77E-01 | 33.80  | 28.32 | 2.33E-01 |
| cg21768395 | 16.36  | 8.24  | 4.72E-02 | 29.22  | 21.07 | 1.66E-01 | 45.75   | 24.93  | 6.65E-02 | 9.68   | 10.23 | 3.44E-01 | 6.84   | 27.66 | 8.05E-01 |
| cg22256677 | 18.16  | 9.15  | 4.72E-02 | 19.25  | 12.36 | 1.19E-01 | 33.86   | 40.25  | 4.00E-01 | 39.92  | 26.05 | 1.25E-01 | 3.35   | 17.42 | 8.47E-01 |
| cg11793646 | -11.61 | 5.85  | 4.72E-02 | -1.46  | 17.27 | 9.33E-01 | -16.67  | 29.73  | 5.75E-01 | -11.12 | 6.65  | 9.44E-02 | -30.31 | 21.77 | 1.64E-01 |
| cg01117213 | -9.91  | 4.99  | 4.72E-02 | -22.92 | 13.71 | 9.45E-02 | -11.23  | 13.56  | 4.08E-01 | -7.78  | 6.09  | 2.02E-01 | -1.96  | 20.40 | 9.23E-01 |
| cg15611112 | -14.32 | 7.21  | 4.72E-02 | -24.42 | 13.90 | 7.90E-02 | 2.53    | 16.14  | 8.76E-01 | -18.96 | 12.29 | 1.23E-01 | -9.21  | 16.72 | 5.82E-01 |
| cg21941374 | 22.15  | 11.16 | 4.72E-02 | 18.45  | 12.82 | 1.50E-01 | -37.44  | 59.72  | 5.31E-01 | 68.86  | 47.95 | 1.51E-01 | 37.58  | 28.57 | 1.88E-01 |
| cg26697310 | 13.80  | 6.95  | 4.72E-02 | 23.92  | 10.11 | 1.80E-02 | 10.27   | 17.30  | 5.53E-01 | 0.87   | 17.45 | 9.60E-01 | 3.34   | 15.29 | 8.27E-01 |
| cg05778367 | -10.52 | 5.30  | 4.72E-02 | -11.48 | 9.85  | 2.44E-01 | -1.94   | 10.50  | 8.53E-01 | -10.95 | 8.97  | 2.22E-01 | -27.24 | 16.34 | 9.56E-02 |
| cg04717595 | 14.64  | 7.37  | 4.72E-02 | 14.84  | 11.82 | 2.09E-01 | 0.86    | 14.38  | 9.52E-01 | 34.39  | 19.99 | 8.54E-02 | 18.67  | 16.02 | 2.44E-01 |
| cg06852461 | 8.52   | 4.29  | 4.72E-02 | 10.36  | 5.56  | 6.24E-02 | 11.43   | 12.80  | 3.72E-01 | 4.10   | 12.04 | 7.34E-01 | 3.26   | 10.59 | 7.58E-01 |
| cg06972043 | -6.40  | 3.23  | 4.72E-02 | -11.42 | 6.73  | 8.97E-02 | -1.09   | 10.09  | 9.14E-01 | -4.61  | 4.47  | 3.03E-01 | -8.56  | 8.38  | 3.07E-01 |
| cg21412355 | -5.13  | 2.58  | 4.72E-02 | -4.24  | 3.57  | 2.35E-01 | -3.37   | 6.10   | 5.80E-01 | -10.96 | 8.89  | 2.17E-01 | -6.49  | 5.62  | 2.48E-01 |
| cg16366262 | -5.14  | 2.59  | 4.72E-02 | -7.02  | 4.28  | 1.01E-01 | -2.42   | 4.82   | 6.15E-01 | -5.08  | 6.63  | 4.44E-01 | -5.72  | 5.92  | 3.34E-01 |

|            |        |       |          |        |       |          |         |        |          |         |       |          |        |       |          |
|------------|--------|-------|----------|--------|-------|----------|---------|--------|----------|---------|-------|----------|--------|-------|----------|
| cg25597667 | 19.57  | 9.86  | 4.72E-02 | 39.52  | 17.93 | 2.75E-02 | -1.47   | 29.23  | 9.60E-01 | 21.44   | 13.25 | 1.06E-01 | -12.61 | 26.99 | 6.40E-01 |
| cg00071051 | 11.72  | 5.91  | 4.72E-02 | 13.42  | 9.15  | 1.42E-01 | 17.22   | 12.36  | 1.64E-01 | -0.07   | 17.03 | 9.97E-01 | 9.39   | 12.20 | 4.42E-01 |
| cg01705897 | 10.82  | 5.46  | 4.72E-02 | 3.38   | 14.11 | 8.11E-01 | 13.77   | 17.61  | 4.34E-01 | 12.62   | 6.60  | 5.60E-02 | 5.34   | 20.28 | 7.92E-01 |
| cg06622994 | -14.57 | 7.34  | 4.72E-02 | -31.72 | 11.79 | 7.15E-03 | -13.44  | 14.51  | 3.54E-01 | -7.32   | 16.81 | 6.63E-01 | -0.92  | 12.49 | 9.41E-01 |
| cg15308737 | 15.93  | 8.03  | 4.72E-02 | 26.63  | 17.29 | 1.24E-01 | -15.89  | 34.06  | 6.41E-01 | 16.92   | 10.19 | 9.67E-02 | 5.27   | 24.36 | 8.29E-01 |
| cg10492953 | 17.48  | 8.81  | 4.72E-02 | 21.41  | 11.12 | 5.41E-02 | 12.28   | 19.94  | 5.38E-01 | 54.83   | 25.40 | 3.09E-02 | 1.20   | 14.07 | 9.32E-01 |
| cg01310482 | -10.71 | 5.40  | 4.72E-02 | -20.61 | 13.41 | 1.24E-01 | -30.90  | 17.01  | 6.93E-02 | -7.70   | 5.34  | 1.49E-01 | 10.21  | 20.84 | 6.24E-01 |
| cg02792677 | 45.68  | 23.02 | 4.72E-02 | 38.68  | 27.37 | 1.58E-01 | 17.72   | 129.92 | 8.92E-01 | 69.72   | 81.09 | 3.90E-01 | 67.25  | 54.19 | 2.15E-01 |
| cg09848508 | 4.84   | 2.44  | 4.73E-02 | 4.12   | 3.57  | 2.48E-01 | 10.41   | 5.10   | 4.12E-02 | 3.71    | 8.73  | 6.70E-01 | 1.08   | 5.12  | 8.33E-01 |
| cg05438378 | -7.84  | 3.95  | 4.73E-02 | -7.24  | 5.66  | 2.01E-01 | -8.19   | 9.33   | 3.80E-01 | 2.72    | 11.39 | 8.11E-01 | -14.87 | 8.56  | 8.24E-02 |
| cg23497683 | -38.27 | 19.29 | 4.73E-02 | -39.30 | 24.04 | 1.02E-01 | -125.88 | 73.70  | 8.76E-02 | -37.54  | 98.94 | 7.04E-01 | -11.69 | 38.61 | 7.62E-01 |
| cg21081852 | 35.49  | 17.89 | 4.73E-02 | 54.44  | 23.41 | 2.00E-02 | 37.10   | 64.03  | 5.62E-01 | 88.44   | 86.10 | 3.04E-01 | -10.25 | 32.95 | 7.56E-01 |
| cg01753327 | -48.73 | 24.56 | 4.73E-02 | -15.78 | 35.60 | 6.58E-01 | -16.50  | 104.12 | 8.74E-01 | -136.65 | 63.06 | 3.02E-02 | -61.82 | 43.66 | 1.57E-01 |
| cg13773898 | -27.51 | 13.86 | 4.73E-02 | -4.25  | 20.72 | 8.37E-01 | -21.28  | 46.11  | 6.44E-01 | -41.69  | 61.00 | 4.94E-01 | -52.46 | 21.64 | 1.54E-02 |
| cg15808472 | -8.43  | 4.25  | 4.73E-02 | -11.63 | 8.80  | 1.86E-01 | 2.14    | 11.65  | 8.55E-01 | -9.15   | 5.99  | 1.27E-01 | -10.71 | 11.75 | 3.62E-01 |
| cg16075649 | 4.93   | 2.48  | 4.73E-02 | 6.33   | 3.17  | 4.59E-02 | 7.99    | 6.10   | 1.90E-01 | -7.83   | 8.08  | 3.32E-01 | 3.63   | 6.96  | 6.02E-01 |
| cg25750259 | -25.39 | 12.80 | 4.73E-02 | -4.93  | 14.55 | 7.35E-01 | -53.65  | 26.70  | 4.45E-02 | -35.63  | 47.70 | 4.55E-01 | -42.44 | 24.27 | 8.04E-02 |
| cg21689228 | 8.07   | 4.07  | 4.73E-02 | 13.13  | 6.02  | 2.93E-02 | 0.17    | 8.79   | 9.84E-01 | 15.53   | 13.86 | 2.63E-01 | 2.91   | 8.22  | 7.23E-01 |
| cg02212606 | 20.24  | 10.20 | 4.73E-02 | 31.51  | 17.45 | 7.09E-02 | 3.20    | 19.96  | 8.73E-01 | 12.78   | 20.40 | 5.31E-01 | 37.03  | 26.63 | 1.64E-01 |
| cg00256226 | 26.38  | 13.30 | 4.73E-02 | 20.36  | 17.81 | 2.53E-01 | 13.46   | 45.18  | 7.66E-01 | 71.41   | 39.24 | 6.88E-02 | 23.48  | 27.07 | 3.86E-01 |
| cg04852949 | -34.87 | 17.58 | 4.73E-02 | -30.87 | 21.98 | 1.60E-01 | -12.40  | 58.25  | 8.31E-01 | -170.35 | 81.48 | 3.66E-02 | -27.23 | 37.25 | 4.65E-01 |
| cg19105241 | 12.49  | 6.30  | 4.73E-02 | 13.25  | 15.67 | 3.98E-01 | 13.76   | 33.30  | 6.79E-01 | 9.27    | 7.44  | 2.13E-01 | 37.06  | 21.36 | 8.27E-02 |
| cg05591270 | 17.28  | 8.71  | 4.73E-02 | 33.22  | 16.64 | 4.59E-02 | -1.53   | 16.68  | 9.27E-01 | 16.38   | 15.83 | 3.01E-01 | 24.16  | 22.44 | 2.82E-01 |
| cg05291677 | -9.18  | 4.63  | 4.73E-02 | -13.99 | 7.71  | 6.95E-02 | -8.20   | 11.44  | 4.74E-01 | 0.28    | 8.69  | 9.75E-01 | -14.92 | 10.54 | 1.57E-01 |
| cg01851399 | 14.07  | 7.09  | 4.73E-02 | 19.64  | 10.39 | 5.88E-02 | 16.73   | 18.49  | 3.66E-01 | 17.43   | 23.78 | 4.63E-01 | 3.06   | 12.98 | 8.14E-01 |
| cg25247083 | -11.92 | 6.01  | 4.73E-02 | -17.09 | 15.63 | 2.74E-01 | 1.94    | 26.80  | 9.42E-01 | -12.74  | 6.97  | 6.76E-02 | -0.33  | 24.94 | 9.89E-01 |
| cg11926020 | -32.98 | 16.63 | 4.73E-02 | -27.21 | 20.73 | 1.89E-01 | -23.81  | 77.34  | 7.58E-01 | -34.94  | 66.64 | 6.00E-01 | -49.20 | 33.40 | 1.41E-01 |
| cg12983839 | 11.75  | 5.92  | 4.73E-02 | 2.69   | 10.22 | 7.92E-01 | 16.27   | 12.18  | 1.82E-01 | 21.33   | 10.27 | 3.78E-02 | -0.99  | 19.18 | 9.59E-01 |
| cg20311601 | -9.42  | 4.75  | 4.73E-02 | -11.72 | 13.61 | 3.89E-01 | -23.99  | 16.92  | 1.56E-01 | -7.60   | 5.61  | 1.75E-01 | -7.91  | 16.47 | 6.31E-01 |
| cg08405378 | 23.22  | 11.71 | 4.73E-02 | -11.88 | 30.79 | 7.00E-01 | 59.64   | 158.23 | 7.06E-01 | 29.34   | 13.26 | 2.69E-02 | 24.68  | 44.18 | 5.76E-01 |
| cg15389749 | -11.33 | 5.71  | 4.73E-02 | -17.34 | 14.41 | 2.29E-01 | -10.57  | 31.08  | 7.34E-01 | -7.69   | 6.81  | 2.59E-01 | -27.06 | 17.66 | 1.25E-01 |
| cg22708635 | 18.56  | 9.36  | 4.73E-02 | 8.64   | 13.01 | 5.07E-01 | 35.01   | 23.16  | 1.31E-01 | 42.48   | 32.14 | 1.86E-01 | 20.36  | 19.32 | 2.92E-01 |
| cg23336996 | -13.76 | 6.94  | 4.73E-02 | -10.44 | 14.96 | 4.85E-01 | 12.39   | 26.76  | 6.43E-01 | -19.77  | 8.47  | 1.95E-02 | 20.14  | 32.35 | 5.33E-01 |
| cg09102610 | -8.24  | 4.16  | 4.73E-02 | -9.46  | 10.60 | 3.72E-01 | -0.07   | 13.64  | 9.96E-01 | -9.69   | 5.18  | 6.14E-02 | -4.98  | 12.52 | 6.91E-01 |
| cg03671075 | -5.51  | 2.78  | 4.73E-02 | -10.93 | 5.21  | 3.60E-02 | -3.04   | 7.14   | 6.70E-01 | -3.18   | 4.34  | 4.64E-01 | -4.15  | 7.08  | 5.58E-01 |



|            |        |       |          |        |       |          |        |        |          |        |       |          |        |       |          |
|------------|--------|-------|----------|--------|-------|----------|--------|--------|----------|--------|-------|----------|--------|-------|----------|
| cg27116232 | 31.29  | 15.78 | 4.73E-02 | 48.58  | 22.45 | 3.04E-02 | 7.90   | 43.23  | 8.55E-01 | -3.85  | 49.50 | 9.38E-01 | 24.44  | 30.28 | 4.20E-01 |
| cg03188016 | 13.65  | 6.88  | 4.73E-02 | 16.99  | 11.12 | 1.27E-01 | 13.36  | 16.73  | 4.24E-01 | 18.62  | 11.61 | 1.09E-01 | -17.20 | 22.16 | 4.37E-01 |
| cg08540100 | 10.24  | 5.16  | 4.73E-02 | 10.20  | 8.07  | 2.06E-01 | 23.03  | 11.27  | 4.11E-02 | 3.67   | 12.63 | 7.72E-01 | 2.91   | 11.16 | 7.94E-01 |
| cg16078649 | 3.64   | 1.84  | 4.73E-02 | 2.93   | 2.64  | 2.67E-01 | 4.58   | 3.66   | 2.10E-01 | 3.71   | 5.83  | 5.25E-01 | 4.29   | 4.55  | 3.45E-01 |
| cg10130900 | 12.25  | 6.18  | 4.73E-02 | 8.85   | 8.69  | 3.09E-01 | 13.22  | 16.69  | 4.28E-01 | 38.40  | 23.78 | 1.06E-01 | 11.64  | 11.46 | 3.10E-01 |
| cg25908504 | 18.38  | 9.27  | 4.73E-02 | 16.14  | 18.53 | 3.84E-01 | 31.97  | 56.00  | 5.68E-01 | 17.56  | 11.81 | 1.37E-01 | 24.87  | 28.38 | 3.81E-01 |
| cg02772159 | 18.21  | 9.18  | 4.73E-02 | 10.78  | 23.95 | 6.53E-01 | 18.66  | 45.83  | 6.84E-01 | 18.69  | 10.77 | 8.27E-02 | 26.55  | 31.19 | 3.95E-01 |
| cg24559261 | 6.54   | 3.30  | 4.73E-02 | 4.51   | 5.13  | 3.79E-01 | 9.37   | 8.53   | 2.72E-01 | 11.99  | 6.20  | 5.31E-02 | -0.78  | 8.41  | 9.26E-01 |
| cg10825398 | -18.33 | 9.24  | 4.73E-02 | -22.39 | 12.42 | 7.15E-02 | 4.92   | 24.28  | 8.39E-01 | -37.45 | 30.54 | 2.20E-01 | -15.35 | 20.18 | 4.47E-01 |
| cg24446178 | -7.78  | 3.92  | 4.73E-02 | -6.85  | 5.89  | 2.45E-01 | -4.55  | 8.92   | 6.10E-01 | -5.25  | 10.86 | 6.29E-01 | -13.68 | 8.14  | 9.29E-02 |
| cg17425144 | -10.73 | 5.41  | 4.73E-02 | -20.52 | 4.86  | 2.42E-05 | 1.10   | 9.30   | 9.06E-01 | -3.42  | 11.54 | 7.67E-01 | -10.20 | 8.20  | 2.14E-01 |
| cg16239218 | -11.02 | 5.56  | 4.73E-02 | -25.77 | 11.31 | 2.26E-02 | 1.71   | 14.74  | 9.08E-01 | -5.70  | 8.31  | 4.93E-01 | -14.68 | 13.48 | 2.76E-01 |
| cg14045803 | 17.37  | 8.76  | 4.73E-02 | 21.23  | 23.79 | 3.72E-01 | 8.86   | 42.17  | 8.33E-01 | 16.61  | 10.43 | 1.12E-01 | 20.69  | 25.70 | 4.21E-01 |
| cg11014468 | 4.97   | 2.50  | 4.73E-02 | 4.47   | 3.27  | 1.71E-01 | 11.95  | 7.34   | 1.03E-01 | 6.17   | 6.37  | 3.32E-01 | -0.04  | 6.65  | 9.95E-01 |
| cg01849637 | 19.96  | 10.06 | 4.73E-02 | 47.35  | 36.24 | 1.91E-01 | -36.93 | 132.55 | 7.81E-01 | 17.20  | 10.97 | 1.17E-01 | 27.05  | 36.54 | 4.59E-01 |
| cg26120636 | -14.93 | 7.53  | 4.74E-02 | -36.14 | 16.78 | 3.13E-02 | 18.04  | 29.69  | 5.44E-01 | -10.59 | 7.19  | 1.40E-01 | -25.32 | 22.60 | 2.63E-01 |
| cg15174783 | 13.51  | 6.81  | 4.74E-02 | 21.02  | 19.25 | 2.75E-01 | -33.00 | 38.05  | 3.86E-01 | 14.81  | 7.71  | 5.48E-02 | 6.05   | 27.31 | 8.25E-01 |
| cg20668447 | 19.72  | 9.95  | 4.74E-02 | 43.09  | 21.80 | 4.81E-02 | -7.64  | 51.12  | 8.81E-01 | 13.81  | 12.38 | 2.64E-01 | 19.63  | 30.26 | 5.17E-01 |
| cg04159901 | 18.89  | 9.53  | 4.74E-02 | 8.75   | 30.43 | 7.74E-01 | 125.38 | 112.60 | 2.65E-01 | 18.10  | 10.49 | 8.45E-02 | 31.44  | 35.89 | 3.81E-01 |
| cg23305899 | -7.65  | 3.86  | 4.74E-02 | -12.14 | 5.91  | 4.01E-02 | -0.37  | 10.87  | 9.73E-01 | -16.09 | 10.88 | 1.39E-01 | -1.29  | 6.79  | 8.49E-01 |
| cg27578760 | 57.90  | 29.20 | 4.74E-02 | 35.66  | 24.86 | 1.52E-01 | 327.20 | 117.54 | 5.37E-03 | 57.97  | 39.67 | 1.44E-01 | 36.07  | 36.42 | 3.22E-01 |
| cg03471150 | 7.48   | 3.77  | 4.74E-02 | 10.37  | 4.90  | 3.43E-02 | 15.61  | 9.86   | 1.13E-01 | -4.86  | 9.14  | 5.95E-01 | 2.63   | 9.84  | 7.89E-01 |
| cg25477576 | 8.87   | 4.48  | 4.74E-02 | -0.11  | 8.35  | 9.90E-01 | 6.85   | 11.13  | 5.38E-01 | 10.39  | 8.07  | 1.98E-01 | 18.90  | 9.07  | 3.72E-02 |
| cg17036164 | -10.29 | 5.19  | 4.74E-02 | -18.10 | 7.80  | 2.03E-02 | 1.58   | 13.00  | 9.03E-01 | -5.76  | 14.50 | 6.91E-01 | -6.63  | 9.98  | 5.06E-01 |
| cg11523712 | 25.80  | 13.01 | 4.74E-02 | 22.84  | 19.60 | 2.44E-01 | 14.28  | 44.21  | 7.47E-01 | 60.11  | 30.25 | 4.69E-02 | 11.73  | 24.28 | 6.29E-01 |
| cg06696800 | 31.23  | 15.75 | 4.74E-02 | 74.08  | 34.55 | 3.20E-02 | 95.44  | 86.19  | 2.68E-01 | 10.98  | 17.45 | 5.29E-01 | 36.46  | 30.87 | 2.37E-01 |
| cg06266097 | 11.15  | 5.62  | 4.74E-02 | 5.99   | 8.78  | 4.95E-01 | 12.71  | 9.76   | 1.93E-01 | 15.32  | 19.86 | 4.40E-01 | 18.22  | 13.32 | 1.71E-01 |
| cg11365324 | 21.85  | 11.02 | 4.74E-02 | 8.44   | 31.81 | 7.91E-01 | -92.37 | 125.52 | 4.62E-01 | 28.76  | 12.33 | 1.97E-02 | -19.13 | 40.56 | 6.37E-01 |
| cg00241638 | 14.10  | 7.11  | 4.74E-02 | 23.68  | 9.67  | 1.43E-02 | 25.84  | 17.51  | 1.40E-01 | 5.16   | 21.41 | 8.10E-01 | -1.39  | 11.56 | 9.04E-01 |
| cg27643859 | 29.28  | 14.77 | 4.74E-02 | 62.86  | 18.58 | 7.15E-04 | 31.58  | 26.13  | 2.27E-01 | 6.95   | 11.60 | 5.49E-01 | 21.43  | 28.39 | 4.50E-01 |
| cg15337006 | 7.00   | 3.53  | 4.74E-02 | 5.99   | 4.61  | 1.94E-01 | 13.64  | 8.34   | 1.02E-01 | 6.94   | 10.81 | 5.21E-01 | 2.38   | 9.84  | 8.09E-01 |
| cg25079628 | -8.77  | 4.42  | 4.74E-02 | -11.54 | 12.20 | 3.44E-01 | -5.83  | 16.41  | 7.22E-01 | -8.92  | 5.28  | 9.13E-02 | -6.07  | 14.40 | 6.73E-01 |
| cg14562060 | -13.06 | 6.59  | 4.74E-02 | -18.48 | 9.94  | 6.32E-02 | 2.78   | 14.18  | 8.45E-01 | 0.93   | 18.58 | 9.60E-01 | -25.75 | 14.03 | 6.66E-02 |
| cg18913872 | 20.44  | 10.31 | 4.74E-02 | 3.62   | 20.61 | 8.60E-01 | 23.50  | 18.43  | 2.02E-01 | 17.99  | 18.99 | 3.44E-01 | 48.38  | 27.35 | 7.69E-02 |
| cg09464268 | 4.55   | 2.30  | 4.74E-02 | 2.89   | 2.66  | 2.77E-01 | 12.37  | 4.84   | 1.06E-02 | 1.46   | 6.32  | 8.17E-01 | 2.30   | 6.06  | 7.04E-01 |

|            |        |       |          |        |       |          |        |        |          |         |       |          |        |       |          |
|------------|--------|-------|----------|--------|-------|----------|--------|--------|----------|---------|-------|----------|--------|-------|----------|
| cg06415710 | -15.37 | 7.75  | 4.74E-02 | -18.54 | 10.03 | 6.46E-02 | 17.03  | 31.71  | 5.91E-01 | -28.02  | 27.17 | 3.02E-01 | -11.60 | 15.16 | 4.44E-01 |
| cg26812852 | -11.32 | 5.71  | 4.74E-02 | 2.71   | 15.39 | 8.60E-01 | -19.19 | 17.83  | 2.82E-01 | -13.39  | 7.06  | 5.79E-02 | -9.11  | 17.47 | 6.02E-01 |
| cg14939765 | -10.28 | 5.19  | 4.74E-02 | -12.38 | 7.89  | 1.17E-01 | -13.06 | 10.19  | 2.00E-01 | -24.96  | 14.69 | 8.92E-02 | 4.96   | 10.90 | 6.49E-01 |
| cg02187357 | 13.76  | 6.94  | 4.74E-02 | -1.57  | 19.84 | 9.37E-01 | -0.82  | 36.78  | 9.82E-01 | 17.65   | 7.83  | 2.41E-02 | 1.93   | 29.19 | 9.47E-01 |
| cg02903852 | -75.47 | 38.07 | 4.74E-02 | -45.24 | 31.15 | 1.46E-01 | 51.28  | 132.52 | 6.99E-01 | -197.12 | 67.77 | 3.63E-03 | -64.60 | 56.36 | 2.52E-01 |
| cg23866916 | 7.11   | 3.59  | 4.74E-02 | 5.55   | 4.49  | 2.16E-01 | 12.70  | 8.73   | 1.46E-01 | 6.97    | 14.03 | 6.19E-01 | 7.54   | 9.99  | 4.50E-01 |
| cg23847712 | 7.91   | 3.99  | 4.74E-02 | 16.17  | 7.30  | 2.68E-02 | 4.91   | 10.24  | 6.32E-01 | 8.81    | 7.60  | 2.46E-01 | -0.34  | 7.63  | 9.65E-01 |
| cg24183678 | -8.69  | 4.38  | 4.74E-02 | -13.06 | 8.82  | 1.39E-01 | -6.58  | 14.89  | 6.59E-01 | -7.86   | 5.84  | 1.78E-01 | -4.53  | 13.72 | 7.41E-01 |
| cg11184109 | 6.59   | 3.33  | 4.74E-02 | 5.65   | 4.27  | 1.86E-01 | 13.60  | 8.82   | 1.23E-01 | 14.24   | 13.26 | 2.83E-01 | 1.79   | 7.68  | 8.16E-01 |
| cg13234275 | 36.22  | 18.27 | 4.74E-02 | 24.23  | 22.81 | 2.88E-01 | 98.33  | 69.63  | 1.58E-01 | 63.92   | 49.44 | 1.96E-01 | 33.81  | 46.72 | 4.69E-01 |
| cg03420866 | -28.75 | 14.50 | 4.75E-02 | -39.35 | 19.26 | 4.10E-02 | 64.38  | 63.65  | 3.12E-01 | -41.84  | 42.61 | 3.26E-01 | -18.60 | 28.18 | 5.09E-01 |
| cg18619804 | -33.27 | 16.78 | 4.75E-02 | -49.12 | 21.47 | 2.22E-02 | 38.22  | 56.92  | 5.02E-01 | 0.74    | 56.82 | 9.90E-01 | -30.95 | 36.22 | 3.93E-01 |
| cg21179892 | -14.70 | 7.42  | 4.75E-02 | -15.53 | 11.32 | 1.70E-01 | 5.47   | 15.81  | 7.30E-01 | -26.50  | 17.61 | 1.32E-01 | -26.22 | 17.84 | 1.42E-01 |
| cg13180844 | -7.18  | 3.62  | 4.75E-02 | -4.87  | 8.08  | 5.47E-01 | -10.49 | 10.21  | 3.04E-01 | -8.23   | 4.72  | 8.14E-02 | -0.44  | 12.46 | 9.72E-01 |
| cg04881472 | 17.18  | 8.67  | 4.75E-02 | 30.02  | 15.90 | 5.91E-02 | 3.84   | 15.16  | 8.00E-01 | 15.03   | 19.67 | 4.45E-01 | 22.51  | 20.33 | 2.68E-01 |
| cg11521470 | 8.68   | 4.38  | 4.75E-02 | 14.53  | 7.11  | 4.09E-02 | 4.49   | 9.48   | 6.36E-01 | 7.70    | 9.55  | 4.20E-01 | 2.98   | 9.87  | 7.63E-01 |
| cg03830375 | 16.15  | 8.15  | 4.75E-02 | 14.53  | 15.07 | 3.35E-01 | 22.06  | 15.49  | 1.55E-01 | 5.51    | 14.70 | 7.08E-01 | 33.06  | 23.11 | 1.53E-01 |
| cg00508965 | 17.98  | 9.07  | 4.75E-02 | 46.56  | 18.94 | 1.40E-02 | 8.55   | 22.25  | 7.01E-01 | 11.63   | 12.63 | 3.57E-01 | 2.26   | 27.14 | 9.33E-01 |
| cg14179065 | 16.42  | 8.28  | 4.75E-02 | 40.59  | 18.53 | 2.85E-02 | 4.16   | 24.43  | 8.65E-01 | 12.80   | 10.89 | 2.40E-01 | 3.93   | 25.39 | 8.77E-01 |
| cg25969673 | 32.02  | 16.15 | 4.75E-02 | 17.26  | 15.42 | 2.63E-01 | 71.47  | 25.83  | 5.66E-03 | -60.84  | 74.71 | 4.15E-01 | 33.69  | 23.45 | 1.51E-01 |
| cg23430415 | 6.32   | 3.19  | 4.75E-02 | 8.27   | 4.20  | 4.91E-02 | 6.69   | 7.93   | 3.99E-01 | -0.55   | 7.96  | 9.45E-01 | 5.56   | 10.00 | 5.78E-01 |
| cg21884509 | -15.28 | 7.71  | 4.75E-02 | -30.13 | 12.98 | 2.02E-02 | 15.38  | 16.76  | 3.59E-01 | -15.07  | 5.82  | 9.60E-03 | -25.11 | 16.48 | 1.28E-01 |
| cg17865114 | 14.09  | 7.11  | 4.75E-02 | 11.48  | 13.37 | 3.91E-01 | 9.59   | 15.31  | 5.31E-01 | 16.43   | 11.33 | 1.47E-01 | 21.36  | 21.60 | 3.23E-01 |
| cg27103436 | -13.24 | 6.68  | 4.75E-02 | -0.46  | 17.50 | 9.79E-01 | -10.05 | 20.97  | 6.32E-01 | -16.58  | 8.20  | 4.31E-02 | -12.87 | 22.40 | 5.66E-01 |
| cg20358011 | 5.86   | 2.96  | 4.75E-02 | 6.93   | 3.91  | 7.63E-02 | -1.34  | 7.35   | 8.55E-01 | 9.55    | 15.63 | 5.41E-01 | 7.72   | 6.18  | 2.12E-01 |
| cg07377172 | -12.88 | 6.50  | 4.75E-02 | -8.97  | 12.92 | 4.87E-01 | -0.12  | 13.78  | 9.93E-01 | -22.32  | 10.22 | 2.90E-02 | -12.90 | 18.65 | 4.89E-01 |
| cg02686681 | 26.02  | 13.13 | 4.75E-02 | 22.96  | 16.39 | 1.61E-01 | 16.19  | 51.64  | 7.54E-01 | -0.25   | 70.20 | 9.97E-01 | 39.64  | 25.81 | 1.25E-01 |
| cg06010711 | 14.58  | 7.36  | 4.75E-02 | -2.63  | 14.26 | 8.54E-01 | 10.87  | 26.72  | 6.84E-01 | 24.00   | 10.11 | 1.76E-02 | 13.65  | 20.57 | 5.07E-01 |
| cg00157223 | -12.63 | 6.37  | 4.75E-02 | -32.54 | 13.42 | 1.53E-02 | -28.12 | 28.91  | 3.31E-01 | -7.83   | 5.22  | 1.34E-01 | -1.23  | 17.36 | 9.43E-01 |
| cg21175623 | 7.06   | 3.56  | 4.75E-02 | 4.50   | 6.31  | 4.76E-01 | 5.32   | 8.79   | 5.45E-01 | 10.09   | 5.45  | 6.39E-02 | 4.85   | 11.89 | 6.83E-01 |
| cg11462939 | 14.82  | 7.48  | 4.75E-02 | 29.88  | 16.14 | 6.41E-02 | 35.09  | 32.12  | 2.75E-01 | 9.49    | 9.22  | 3.04E-01 | 3.63   | 27.50 | 8.95E-01 |
| cg08955099 | -7.81  | 3.94  | 4.75E-02 | -12.68 | 6.59  | 5.43E-02 | 9.20   | 12.02  | 4.44E-01 | -5.68   | 4.89  | 2.45E-01 | -16.46 | 9.81  | 9.32E-02 |
| cg00771722 | 10.77  | 5.44  | 4.75E-02 | 9.29   | 7.55  | 2.19E-01 | 22.95  | 13.11  | 8.01E-02 | 4.94    | 12.34 | 6.89E-01 | 9.13   | 15.97 | 5.67E-01 |
| cg08072171 | -14.13 | 7.13  | 4.75E-02 | -29.66 | 16.17 | 6.66E-02 | -34.84 | 35.11  | 3.21E-01 | -12.75  | 6.91  | 6.49E-02 | 22.04  | 25.99 | 3.96E-01 |
| cg12345526 | 5.51   | 2.78  | 4.75E-02 | 5.56   | 3.63  | 1.25E-01 | 9.46   | 7.03   | 1.79E-01 | 3.19    | 8.00  | 6.90E-01 | 2.80   | 7.56  | 7.11E-01 |

|            |        |       |          |         |       |          |         |        |          |        |       |          |        |       |          |
|------------|--------|-------|----------|---------|-------|----------|---------|--------|----------|--------|-------|----------|--------|-------|----------|
| cg22735749 | -10.47 | 5.29  | 4.75E-02 | -4.80   | 12.42 | 6.99E-01 | 11.48   | 23.18  | 6.20E-01 | -15.82 | 6.50  | 1.50E-02 | 2.43   | 16.26 | 8.81E-01 |
| cg25298189 | 5.47   | 2.76  | 4.75E-02 | 5.54    | 3.17  | 8.00E-02 | 8.24    | 7.04   | 2.42E-01 | 6.83   | 14.84 | 6.46E-01 | -5.12  | 12.42 | 6.80E-01 |
| cg05292954 | 18.35  | 9.26  | 4.75E-02 | 32.09   | 13.63 | 1.85E-02 | -14.75  | 34.63  | 6.70E-01 | 34.84  | 30.91 | 2.60E-01 | 5.07   | 14.52 | 7.27E-01 |
| cg05994690 | 15.19  | 7.67  | 4.75E-02 | 5.67    | 13.49 | 6.74E-01 | 7.42    | 14.89  | 6.18E-01 | 33.71  | 13.63 | 1.34E-02 | 7.60   | 24.79 | 7.59E-01 |
| cg16863872 | -24.41 | 12.32 | 4.75E-02 | -121.73 | 66.32 | 6.64E-02 | 8.02    | 174.93 | 9.63E-01 | -21.47 | 13.10 | 1.01E-01 | -16.69 | 44.54 | 7.08E-01 |
| cg18898125 | 15.27  | 7.71  | 4.75E-02 | 13.83   | 17.91 | 4.40E-01 | 23.66   | 30.03  | 4.31E-01 | 13.31  | 9.86  | 1.77E-01 | 21.81  | 20.69 | 2.92E-01 |
| cg03723716 | 25.13  | 12.68 | 4.75E-02 | 23.76   | 22.66 | 2.94E-01 | 25.92   | 35.58  | 4.66E-01 | 10.56  | 15.38 | 4.92E-01 | 77.94  | 32.70 | 1.71E-02 |
| cg05485968 | 18.96  | 9.57  | 4.75E-02 | 25.78   | 22.76 | 2.57E-01 | 43.71   | 22.42  | 5.13E-02 | 5.23   | 13.12 | 6.90E-01 | 33.66  | 29.01 | 2.46E-01 |
| cg08551047 | -6.79  | 3.43  | 4.75E-02 | -8.59   | 5.64  | 1.28E-01 | -0.78   | 6.46   | 9.04E-01 | -4.71  | 10.85 | 6.64E-01 | -11.79 | 6.87  | 8.62E-02 |
| cg11131599 | -10.03 | 5.06  | 4.75E-02 | -12.05  | 9.73  | 2.15E-01 | -23.83  | 13.47  | 7.68E-02 | -0.99  | 6.42  | 8.77E-01 | -17.70 | 10.02 | 7.73E-02 |
| cg19397221 | 22.20  | 11.20 | 4.75E-02 | 26.09   | 14.96 | 8.13E-02 | 18.43   | 50.01  | 7.12E-01 | 81.75  | 78.55 | 2.98E-01 | 13.52  | 18.44 | 4.64E-01 |
| cg22637435 | 6.77   | 3.41  | 4.75E-02 | 8.10    | 4.80  | 9.17E-02 | 19.25   | 10.83  | 7.55E-02 | 4.74   | 7.70  | 5.38E-01 | -0.87  | 7.66  | 9.10E-01 |
| cg13409439 | -9.37  | 4.73  | 4.75E-02 | -6.61   | 10.03 | 5.10E-01 | -28.81  | 16.37  | 7.85E-02 | -8.84  | 6.23  | 1.56E-01 | -3.46  | 13.72 | 8.01E-01 |
| cg27025483 | -13.30 | 6.71  | 4.75E-02 | -3.39   | 9.89  | 7.32E-01 | -1.53   | 24.76  | 9.51E-01 | -22.63 | 11.39 | 4.70E-02 | -31.92 | 19.55 | 1.03E-01 |
| cg12653796 | 12.13  | 6.12  | 4.76E-02 | 15.81   | 10.92 | 1.48E-01 | 3.11    | 16.91  | 8.54E-01 | 20.54  | 10.91 | 5.97E-02 | 1.18   | 12.52 | 9.25E-01 |
| cg16469258 | -31.78 | 16.04 | 4.76E-02 | 13.20   | 47.54 | 7.81E-01 | -180.75 | 221.00 | 4.13E-01 | -40.82 | 17.71 | 2.11E-02 | 19.39  | 65.25 | 7.66E-01 |
| cg17886678 | 18.82  | 9.50  | 4.76E-02 | 27.39   | 15.35 | 7.44E-02 | 22.05   | 22.97  | 3.37E-01 | 24.16  | 29.94 | 4.20E-01 | 6.16   | 16.17 | 7.03E-01 |
| cg03636183 | 11.25  | 5.68  | 4.76E-02 | 2.02    | 9.05  | 8.24E-01 | 13.56   | 10.10  | 1.80E-01 | 31.39  | 16.88 | 6.30E-02 | 14.76  | 13.46 | 2.73E-01 |
| cg02758236 | 11.23  | 5.67  | 4.76E-02 | 6.43    | 5.69  | 2.58E-01 | 33.72   | 14.49  | 2.00E-02 | 22.29  | 17.16 | 1.94E-01 | 4.92   | 9.54  | 6.06E-01 |
| cg06968926 | 15.95  | 8.05  | 4.76E-02 | 25.00   | 11.32 | 2.72E-02 | 18.37   | 18.50  | 3.21E-01 | 1.05   | 20.13 | 9.58E-01 | -2.45  | 21.21 | 9.08E-01 |
| cg04109655 | 16.44  | 8.30  | 4.76E-02 | 10.65   | 13.44 | 4.28E-01 | 20.44   | 15.94  | 2.00E-01 | 19.52  | 19.05 | 3.05E-01 | 19.90  | 20.92 | 3.41E-01 |
| cg19168676 | 23.69  | 11.96 | 4.76E-02 | 19.24   | 24.58 | 4.34E-01 | 39.52   | 50.49  | 4.34E-01 | 19.68  | 15.79 | 2.13E-01 | 42.13  | 32.70 | 1.98E-01 |
| cg16692732 | 15.91  | 8.03  | 4.76E-02 | 21.98   | 11.56 | 5.73E-02 | 17.81   | 21.98  | 4.18E-01 | 27.95  | 25.49 | 2.73E-01 | 0.54   | 15.04 | 9.72E-01 |
| cg17769523 | -6.41  | 3.24  | 4.76E-02 | -12.42  | 6.04  | 3.96E-02 | -4.37   | 6.51   | 5.02E-01 | -1.56  | 5.81  | 7.89E-01 | -8.23  | 8.21  | 3.16E-01 |
| cg10636403 | 17.15  | 8.66  | 4.76E-02 | 20.25   | 19.07 | 2.88E-01 | -3.68   | 30.26  | 9.03E-01 | 22.59  | 11.44 | 4.82E-02 | 2.41   | 23.20 | 9.17E-01 |
| cg16253537 | 29.15  | 14.71 | 4.76E-02 | -0.21   | 44.78 | 9.96E-01 | 60.38   | 167.40 | 7.18E-01 | 36.64  | 16.38 | 2.54E-02 | -10.77 | 52.72 | 8.38E-01 |
| cg13049471 | -11.24 | 5.67  | 4.76E-02 | -14.68  | 10.98 | 1.81E-01 | -7.15   | 14.14  | 6.13E-01 | -10.88 | 8.46  | 1.99E-01 | -10.42 | 16.17 | 5.19E-01 |
| cg02251742 | 18.05  | 9.11  | 4.76E-02 | 11.89   | 15.78 | 4.51E-01 | 2.17    | 24.46  | 9.29E-01 | 56.62  | 27.85 | 4.21E-02 | 18.36  | 14.04 | 1.91E-01 |
| cg10120112 | 30.25  | 15.27 | 4.76E-02 | 9.10    | 49.48 | 8.54E-01 | 79.10   | 207.93 | 7.04E-01 | 26.15  | 16.73 | 1.18E-01 | 107.13 | 58.95 | 6.92E-02 |
| cg13496915 | -13.97 | 7.05  | 4.76E-02 | -11.05  | 19.12 | 5.63E-01 | 31.13   | 36.33  | 3.92E-01 | -16.56 | 8.03  | 3.91E-02 | -15.74 | 30.09 | 6.01E-01 |
| cg12823408 | -18.60 | 9.39  | 4.76E-02 | -13.65  | 12.84 | 2.88E-01 | 15.40   | 46.84  | 7.42E-01 | -30.17 | 15.69 | 5.44E-02 | -16.64 | 36.35 | 6.47E-01 |
| cg09313191 | -17.42 | 8.79  | 4.76E-02 | -16.17  | 20.23 | 4.24E-01 | -17.57  | 48.72  | 7.18E-01 | -16.55 | 10.59 | 1.18E-01 | -26.79 | 29.52 | 3.64E-01 |
| cg18587340 | 19.42  | 9.80  | 4.76E-02 | 34.65   | 23.88 | 1.47E-01 | 27.73   | 40.70  | 4.96E-01 | 10.92  | 12.65 | 3.88E-01 | 31.39  | 23.61 | 1.84E-01 |
| cg11902748 | -12.54 | 6.33  | 4.76E-02 | -23.90  | 6.31  | 1.53E-04 | -11.58  | 8.62   | 1.79E-01 | 1.54   | 6.74  | 8.19E-01 | -17.03 | 10.66 | 1.10E-01 |
| cg16300021 | -20.65 | 10.42 | 4.76E-02 | -17.71  | 14.68 | 2.28E-01 | -16.25  | 36.48  | 6.56E-01 | -62.59 | 28.82 | 2.99E-02 | -7.79  | 19.59 | 6.91E-01 |

|               |        |       |          |        |       |          |         |        |          |        |       |          |         |       |          |
|---------------|--------|-------|----------|--------|-------|----------|---------|--------|----------|--------|-------|----------|---------|-------|----------|
| cg14149503    | 11.69  | 5.90  | 4.76E-02 | 1.97   | 10.74 | 8.54E-01 | 3.46    | 16.15  | 8.30E-01 | 20.92  | 9.19  | 2.28E-02 | 13.18   | 15.14 | 3.84E-01 |
| cg16445007    | -10.10 | 5.10  | 4.76E-02 | -18.85 | 8.95  | 3.52E-02 | -5.46   | 11.99  | 6.49E-01 | -6.54  | 8.37  | 4.34E-01 | -4.60   | 14.45 | 7.50E-01 |
| cg18238973    | -11.94 | 6.03  | 4.76E-02 | -4.40  | 12.21 | 7.19E-01 | 5.06    | 16.43  | 7.58E-01 | -20.72 | 7.19  | 3.97E-03 | -0.56   | 19.73 | 9.77E-01 |
| cg10756457    | -8.11  | 4.09  | 4.76E-02 | -21.47 | 10.81 | 4.70E-02 | -0.47   | 19.76  | 9.81E-01 | -5.92  | 4.79  | 2.17E-01 | -8.23   | 14.13 | 5.60E-01 |
| cg16909408    | 15.13  | 7.64  | 4.76E-02 | 36.36  | 23.40 | 1.20E-01 | 53.04   | 34.24  | 1.21E-01 | 10.87  | 9.50  | 2.52E-01 | 8.07    | 17.24 | 6.40E-01 |
| cg12235146    | 22.70  | 11.46 | 4.76E-02 | 9.36   | 14.79 | 5.27E-01 | 21.98   | 15.74  | 1.63E-01 | 9.70   | 14.32 | 4.98E-01 | 72.49   | 24.41 | 2.99E-03 |
| cg06672250    | 13.31  | 6.72  | 4.76E-02 | 6.37   | 9.69  | 5.11E-01 | 22.73   | 13.32  | 8.78E-02 | 19.73  | 20.84 | 3.44E-01 | 15.03   | 16.79 | 3.70E-01 |
| cg21656205    | -4.56  | 2.30  | 4.76E-02 | -4.92  | 3.42  | 1.50E-01 | -2.90   | 4.48   | 5.17E-01 | -5.62  | 8.34  | 5.00E-01 | -5.53   | 5.09  | 2.77E-01 |
| cg22512663    | -6.53  | 3.30  | 4.76E-02 | -9.68  | 5.08  | 5.67E-02 | -6.87   | 6.49   | 2.90E-01 | -3.29  | 9.60  | 7.32E-01 | -1.45   | 7.31  | 8.43E-01 |
| cg18759346    | -59.63 | 30.11 | 4.76E-02 | -78.40 | 38.44 | 4.14E-02 | -124.51 | 165.42 | 4.52E-01 | -12.78 | 90.76 | 8.88E-01 | -24.70  | 61.00 | 6.86E-01 |
| cg22196952    | 26.65  | 13.46 | 4.76E-02 | 10.32  | 38.44 | 7.88E-01 | -136.09 | 162.71 | 4.03E-01 | 34.01  | 15.08 | 2.41E-02 | -10.37  | 49.40 | 8.34E-01 |
| cg23537305    | -16.97 | 8.57  | 4.76E-02 | -43.57 | 14.29 | 2.30E-03 | -13.54  | 17.22  | 4.32E-01 | -7.40  | 7.64  | 3.32E-01 | -9.15   | 16.31 | 5.75E-01 |
| cg25376409    | 15.01  | 7.58  | 4.76E-02 | -6.25  | 15.68 | 6.90E-01 | 15.05   | 16.63  | 3.65E-01 | 22.61  | 11.24 | 4.43E-02 | 29.40   | 23.46 | 2.10E-01 |
| cg19186145    | 12.56  | 6.34  | 4.76E-02 | 53.70  | 26.21 | 4.04E-02 | 14.02   | 29.25  | 6.32E-01 | 10.85  | 7.16  | 1.30E-01 | 2.18    | 19.18 | 9.10E-01 |
| cg16823535    | 11.71  | 5.91  | 4.77E-02 | 17.71  | 6.73  | 8.55E-03 | 8.86    | 20.91  | 6.72E-01 | 3.34   | 32.34 | 9.18E-01 | -8.36   | 13.58 | 5.38E-01 |
| ch.5.3268483F | -10.92 | 5.51  | 4.77E-02 | 3.24   | 9.97  | 7.45E-01 | -22.24  | 10.15  | 2.84E-02 | -11.69 | 9.99  | 2.42E-01 | -14.26  | 11.95 | 2.33E-01 |
| cg11572308    | 18.93  | 9.56  | 4.77E-02 | 32.14  | 19.31 | 9.60E-02 | -0.69   | 19.45  | 9.72E-01 | 15.63  | 16.23 | 3.35E-01 | 34.79   | 23.41 | 1.37E-01 |
| cg03713186    | 15.45  | 7.80  | 4.77E-02 | 1.45   | 19.97 | 9.42E-01 | 38.02   | 24.89  | 1.27E-01 | 12.33  | 9.43  | 1.91E-01 | 47.35   | 30.71 | 1.23E-01 |
| cg17208740    | 13.82  | 6.98  | 4.77E-02 | 27.86  | 12.91 | 3.09E-02 | 1.56    | 16.06  | 9.22E-01 | 6.06   | 11.34 | 5.93E-01 | 22.04   | 18.65 | 2.37E-01 |
| cg09890699    | 8.02   | 4.05  | 4.77E-02 | 9.63   | 6.36  | 1.30E-01 | 17.20   | 11.32  | 1.29E-01 | 1.97   | 7.87  | 8.03E-01 | 6.91    | 9.00  | 4.43E-01 |
| cg12642651    | -17.13 | 8.65  | 4.77E-02 | -35.30 | 16.28 | 3.02E-02 | -6.74   | 18.94  | 7.22E-01 | -5.37  | 11.18 | 6.31E-01 | -38.39  | 23.15 | 9.72E-02 |
| cg20201566    | 49.36  | 24.93 | 4.77E-02 | 23.94  | 62.19 | 7.00E-01 | -27.54  | 273.13 | 9.20E-01 | 57.85  | 29.06 | 4.65E-02 | 33.39   | 80.74 | 6.79E-01 |
| cg16130802    | -28.59 | 14.44 | 4.77E-02 | -27.42 | 23.79 | 2.49E-01 | -29.86  | 103.38 | 7.73E-01 | -31.26 | 24.65 | 2.05E-01 | -26.71  | 27.84 | 3.37E-01 |
| cg27222162    | -47.36 | 23.92 | 4.77E-02 | -30.86 | 32.61 | 3.44E-01 | 63.30   | 83.57  | 4.49E-01 | -43.17 | 32.63 | 1.86E-01 | -105.30 | 39.10 | 7.07E-03 |
| cg17582074    | 10.66  | 5.39  | 4.77E-02 | 12.98  | 7.28  | 7.48E-02 | 12.08   | 13.95  | 3.86E-01 | 1.24   | 20.42 | 9.52E-01 | 7.17    | 11.11 | 5.19E-01 |
| cg27295033    | 26.17  | 13.21 | 4.77E-02 | 18.72  | 35.96 | 6.03E-01 | 111.68  | 172.84 | 5.18E-01 | 27.10  | 14.95 | 6.99E-02 | 23.31   | 47.39 | 6.23E-01 |
| cg00582663    | 5.47   | 2.76  | 4.77E-02 | 4.68   | 3.37  | 1.65E-01 | 11.90   | 6.93   | 8.58E-02 | 6.48   | 11.38 | 5.69E-01 | 0.43    | 8.41  | 9.59E-01 |
| cg22831978    | -14.98 | 7.57  | 4.77E-02 | -10.71 | 18.88 | 5.70E-01 | -18.58  | 21.99  | 3.98E-01 | -16.88 | 9.51  | 7.59E-02 | -4.31   | 25.49 | 8.66E-01 |
| cg05785348    | -12.24 | 6.18  | 4.77E-02 | -20.03 | 7.90  | 1.13E-02 | -2.68   | 16.64  | 8.72E-01 | -13.00 | 31.99 | 6.85E-01 | 4.12    | 13.43 | 7.59E-01 |
| cg01934797    | 17.05  | 8.61  | 4.77E-02 | 11.41  | 13.17 | 3.86E-01 | 12.29   | 44.20  | 7.81E-01 | 23.44  | 13.20 | 7.58E-02 | 15.89   | 26.07 | 5.42E-01 |
| cg13918628    | -12.35 | 6.23  | 4.77E-02 | -9.51  | 14.24 | 5.04E-01 | -62.18  | 38.14  | 1.03E-01 | -9.12  | 7.49  | 2.24E-01 | -28.69  | 20.95 | 1.71E-01 |
| cg13692433    | 29.77  | 15.04 | 4.77E-02 | 25.33  | 17.91 | 1.57E-01 | 27.43   | 53.23  | 6.06E-01 | 34.96  | 48.27 | 4.69E-01 | 53.59   | 43.76 | 2.21E-01 |
| cg20286344    | -13.35 | 6.74  | 4.77E-02 | -25.20 | 11.04 | 2.25E-02 | 5.37    | 23.32  | 8.18E-01 | -14.12 | 8.56  | 9.89E-02 | 11.27   | 19.99 | 5.73E-01 |
| cg18017908    | 10.17  | 5.14  | 4.77E-02 | 11.01  | 7.71  | 1.53E-01 | 18.68   | 12.26  | 1.28E-01 | 9.15   | 11.06 | 4.08E-01 | 0.16    | 12.68 | 9.90E-01 |
| cg07955126    | 7.43   | 3.75  | 4.77E-02 | 7.67   | 5.37  | 1.53E-01 | 14.30   | 7.65   | 6.14E-02 | 2.69   | 10.47 | 7.97E-01 | -0.76   | 9.96  | 9.39E-01 |

|                 |        |       |          |        |       |          |        |        |          |        |       |          |        |       |          |
|-----------------|--------|-------|----------|--------|-------|----------|--------|--------|----------|--------|-------|----------|--------|-------|----------|
| cg04210284      | 15.82  | 7.99  | 4.77E-02 | 17.50  | 36.80 | 6.34E-01 | 40.46  | 61.41  | 5.10E-01 | 14.15  | 8.52  | 9.66E-02 | 33.20  | 33.81 | 3.26E-01 |
| cg00591421      | 4.96   | 2.50  | 4.77E-02 | 5.46   | 3.69  | 1.39E-01 | 10.76  | 6.53   | 9.94E-02 | 5.32   | 4.65  | 2.53E-01 | -6.52  | 7.77  | 4.01E-01 |
| cg03312958      | 7.83   | 3.96  | 4.77E-02 | 9.65   | 6.05  | 1.11E-01 | 4.24   | 9.70   | 6.62E-01 | 17.51  | 9.03  | 5.25E-02 | -1.68  | 8.55  | 8.44E-01 |
| cg18015704      | 29.66  | 14.98 | 4.77E-02 | 34.58  | 21.34 | 1.05E-01 | 14.34  | 39.49  | 7.17E-01 | 42.44  | 50.92 | 4.05E-01 | 24.87  | 28.49 | 3.83E-01 |
| cg24719241      | -13.75 | 6.94  | 4.77E-02 | -25.68 | 15.49 | 9.74E-02 | -7.99  | 12.07  | 5.08E-01 | -15.02 | 10.79 | 1.64E-01 | 5.11   | 29.87 | 8.64E-01 |
| cg17408789      | 23.52  | 11.88 | 4.77E-02 | 36.15  | 15.37 | 1.87E-02 | 5.07   | 39.82  | 8.99E-01 | 20.91  | 46.87 | 6.56E-01 | 0.51   | 23.81 | 9.83E-01 |
| cg23906291      | 43.79  | 22.12 | 4.77E-02 | 51.55  | 32.16 | 1.09E-01 | -58.61 | 68.33  | 3.91E-01 | 33.48  | 16.71 | 4.51E-02 | 114.02 | 45.96 | 1.31E-02 |
| cg26118045      | 7.51   | 3.79  | 4.77E-02 | 9.17   | 5.66  | 1.06E-01 | 0.77   | 8.88   | 9.31E-01 | 8.42   | 11.52 | 4.65E-01 | 8.98   | 7.42  | 2.26E-01 |
| cg27446047      | 16.37  | 8.27  | 4.77E-02 | -20.51 | 32.68 | 5.30E-01 | 47.50  | 130.64 | 7.16E-01 | 20.14  | 8.73  | 2.11E-02 | -16.33 | 44.18 | 7.12E-01 |
| cg12188928      | 7.95   | 4.02  | 4.77E-02 | 5.12   | 6.97  | 4.63E-01 | 11.74  | 8.95   | 1.90E-01 | 12.20  | 6.67  | 6.75E-02 | -5.03  | 12.39 | 6.85E-01 |
| cg13283896      | 13.30  | 6.72  | 4.77E-02 | 0.28   | 12.29 | 9.82E-01 | 29.25  | 12.02  | 1.50E-02 | 14.74  | 13.69 | 2.82E-01 | 5.94   | 15.35 | 6.99E-01 |
| cg19165274      | 5.10   | 2.58  | 4.77E-02 | 7.00   | 3.64  | 5.43E-02 | 10.16  | 7.30   | 1.64E-01 | 7.58   | 7.83  | 3.33E-01 | -1.87  | 5.00  | 7.08E-01 |
| cg16240162      | 14.27  | 7.21  | 4.77E-02 | 5.06   | 13.72 | 7.12E-01 | 12.30  | 16.31  | 4.51E-01 | 23.77  | 14.00 | 8.96E-02 | 15.85  | 14.06 | 2.60E-01 |
| ch.6.169008488F | 40.47  | 20.44 | 4.77E-02 | 43.83  | 25.58 | 8.66E-02 | 90.06  | 119.44 | 4.51E-01 | 59.80  | 68.46 | 3.82E-01 | 18.56  | 41.46 | 6.54E-01 |
| cg26167249      | -14.16 | 7.15  | 4.77E-02 | -7.07  | 13.11 | 5.90E-01 | -7.35  | 17.42  | 6.73E-01 | -13.21 | 13.11 | 3.14E-01 | -29.12 | 14.71 | 4.77E-02 |
| cg17898054      | 8.89   | 4.49  | 4.77E-02 | 5.14   | 6.77  | 4.48E-01 | 18.24  | 12.80  | 1.54E-01 | 15.09  | 7.88  | 5.56E-02 | -4.62  | 13.44 | 7.31E-01 |
| cg22413209      | -15.69 | 7.93  | 4.78E-02 | -13.55 | 12.30 | 2.71E-01 | 9.78   | 25.80  | 7.05E-01 | -31.82 | 15.51 | 4.02E-02 | -11.70 | 16.56 | 4.80E-01 |
| cg23090824      | 8.58   | 4.34  | 4.78E-02 | 11.77  | 5.99  | 4.95E-02 | 3.30   | 12.32  | 7.89E-01 | 1.46   | 15.82 | 9.26E-01 | 6.85   | 8.23  | 4.05E-01 |
| cg05382012      | 5.67   | 2.87  | 4.78E-02 | 5.64   | 3.75  | 1.33E-01 | 10.02  | 7.91   | 2.05E-01 | 9.54   | 7.49  | 2.03E-01 | -2.34  | 7.68  | 7.61E-01 |
| cg04357398      | -14.64 | 7.40  | 4.78E-02 | -18.66 | 14.64 | 2.03E-01 | 9.86   | 20.41  | 6.29E-01 | -22.62 | 10.36 | 2.91E-02 | 3.31   | 22.93 | 8.85E-01 |
| cg23785940      | 18.74  | 9.47  | 4.78E-02 | 29.54  | 14.30 | 3.89E-02 | -11.74 | 25.35  | 6.43E-01 | 34.44  | 26.74 | 1.98E-01 | 10.51  | 17.37 | 5.45E-01 |
| cg21487207      | 14.20  | 7.17  | 4.78E-02 | 9.17   | 8.38  | 2.74E-01 | 35.42  | 28.28  | 2.10E-01 | 42.04  | 22.47 | 6.14E-02 | 9.09   | 22.62 | 6.88E-01 |
| cg14852276      | 7.43   | 3.75  | 4.78E-02 | 5.61   | 5.58  | 3.15E-01 | 16.19  | 9.07   | 7.43E-02 | 8.56   | 7.34  | 2.44E-01 | -1.05  | 11.10 | 9.25E-01 |
| cg02160738      | -15.86 | 8.01  | 4.78E-02 | -19.36 | 12.82 | 1.31E-01 | -39.30 | 22.66  | 8.28E-02 | -18.88 | 17.88 | 2.91E-01 | 1.41   | 15.03 | 9.25E-01 |
| cg21714305      | -17.19 | 8.69  | 4.78E-02 | -14.06 | 19.09 | 4.61E-01 | -7.79  | 39.70  | 8.45E-01 | -16.73 | 10.73 | 1.19E-01 | -32.87 | 29.01 | 2.57E-01 |
| cg20188212      | 4.66   | 2.35  | 4.78E-02 | 7.21   | 3.21  | 2.47E-02 | 1.44   | 4.60   | 7.55E-01 | 11.91  | 6.62  | 7.19E-02 | -0.09  | 4.40  | 9.83E-01 |
| cg15323828      | -10.32 | 5.21  | 4.78E-02 | -10.86 | 7.02  | 1.22E-01 | -11.58 | 13.00  | 3.73E-01 | -8.92  | 16.20 | 5.82E-01 | -8.38  | 12.15 | 4.90E-01 |
| cg16810621      | -4.38  | 2.21  | 4.78E-02 | -7.91  | 3.65  | 3.02E-02 | 2.86   | 5.57   | 6.07E-01 | -2.73  | 3.67  | 4.57E-01 | -7.35  | 5.61  | 1.90E-01 |
| cg00066828      | -39.02 | 19.71 | 4.78E-02 | -31.72 | 30.42 | 2.97E-01 | 16.94  | 72.45  | 8.15E-01 | -63.49 | 35.85 | 7.66E-02 | -38.09 | 43.68 | 3.83E-01 |
| cg26072058      | 14.43  | 7.29  | 4.78E-02 | 12.24  | 24.29 | 6.14E-01 | 83.23  | 118.47 | 4.82E-01 | 13.82  | 8.00  | 8.40E-02 | 20.48  | 26.76 | 4.44E-01 |
| cg14836978      | 21.99  | 11.11 | 4.78E-02 | 22.01  | 20.90 | 2.92E-01 | 3.64   | 21.90  | 8.68E-01 | 24.03  | 19.81 | 2.25E-01 | 49.93  | 29.10 | 8.62E-02 |
| cg21426239      | 21.17  | 10.70 | 4.78E-02 | 40.58  | 15.86 | 1.05E-02 | -4.99  | 27.24  | 8.55E-01 | 15.49  | 35.52 | 6.63E-01 | 6.90   | 19.53 | 7.24E-01 |
| cg09362796      | -6.34  | 3.20  | 4.78E-02 | -5.68  | 4.09  | 1.65E-01 | -18.17 | 9.17   | 4.76E-02 | -8.43  | 10.33 | 4.14E-01 | 1.00   | 7.79  | 8.98E-01 |
| cg20293725      | 12.26  | 6.19  | 4.78E-02 | 10.57  | 10.31 | 3.05E-01 | -1.49  | 12.77  | 9.07E-01 | 18.49  | 11.40 | 1.05E-01 | 30.74  | 18.81 | 1.02E-01 |
| cg00264754      | -11.06 | 5.59  | 4.78E-02 | -23.54 | 10.75 | 2.85E-02 | -17.41 | 16.60  | 2.94E-01 | -3.09  | 5.48  | 5.73E-01 | -18.84 | 14.79 | 2.03E-01 |

|            |        |       |          |        |       |          |         |        |          |        |       |          |        |       |          |
|------------|--------|-------|----------|--------|-------|----------|---------|--------|----------|--------|-------|----------|--------|-------|----------|
| cg20472085 | -25.00 | 12.63 | 4.78E-02 | -51.04 | 33.41 | 1.27E-01 | -130.69 | 132.26 | 3.23E-01 | -23.48 | 14.53 | 1.06E-01 | 13.50  | 41.68 | 7.46E-01 |
| cg00474854 | -11.68 | 5.90  | 4.78E-02 | -11.38 | 18.52 | 5.39E-01 | -11.21  | 12.66  | 3.76E-01 | -15.07 | 8.13  | 6.39E-02 | -0.99  | 15.01 | 9.47E-01 |
| cg03871468 | -34.05 | 17.21 | 4.78E-02 | -14.87 | 23.87 | 5.33E-01 | 25.34   | 85.40  | 7.67E-01 | -40.05 | 38.86 | 3.03E-01 | -80.01 | 34.85 | 2.17E-02 |
| cg07546654 | 6.56   | 3.31  | 4.78E-02 | 2.80   | 3.49  | 4.23E-01 | 11.85   | 5.38   | 2.75E-02 | 14.05  | 6.26  | 2.47E-02 | -1.14  | 6.92  | 8.69E-01 |
| cg26646527 | 12.56  | 6.35  | 4.78E-02 | 10.72  | 13.72 | 4.35E-01 | -10.68  | 29.47  | 7.17E-01 | 14.13  | 7.98  | 7.66E-02 | 17.13  | 19.49 | 3.79E-01 |
| cg11229663 | 3.56   | 1.80  | 4.78E-02 | 2.55   | 2.69  | 3.43E-01 | 5.27    | 3.82   | 1.68E-01 | 2.91   | 3.94  | 4.61E-01 | 5.18   | 5.06  | 3.07E-01 |
| cg11829200 | 17.79  | 8.99  | 4.78E-02 | 8.04   | 20.22 | 6.91E-01 | 45.76   | 38.89  | 2.39E-01 | 13.29  | 11.26 | 2.38E-01 | 47.55  | 26.98 | 7.80E-02 |
| cg01627405 | 4.80   | 2.42  | 4.78E-02 | 4.26   | 2.95  | 1.49E-01 | 11.74   | 6.43   | 6.78E-02 | 6.54   | 8.93  | 4.64E-01 | -2.00  | 7.27  | 7.84E-01 |
| cg14209244 | -7.23  | 3.65  | 4.78E-02 | -15.98 | 8.63  | 6.39E-02 | 4.56    | 15.47  | 7.68E-01 | -4.44  | 4.58  | 3.32E-01 | -13.97 | 10.20 | 1.71E-01 |
| cg13046237 | 12.77  | 6.45  | 4.78E-02 | 24.84  | 19.14 | 1.94E-01 | 15.72   | 22.19  | 4.79E-01 | 11.10  | 7.68  | 1.48E-01 | 8.11   | 20.91 | 6.98E-01 |
| cg07641563 | -8.56  | 4.33  | 4.78E-02 | -14.95 | 10.06 | 1.37E-01 | -13.34  | 15.86  | 4.01E-01 | -8.12  | 5.50  | 1.40E-01 | 1.81   | 12.39 | 8.84E-01 |
| cg14931118 | -5.79  | 2.93  | 4.78E-02 | -6.37  | 4.18  | 1.28E-01 | 0.99    | 6.13   | 8.72E-01 | -12.56 | 4.68  | 7.32E-03 | -1.16  | 6.18  | 8.51E-01 |
| cg15280358 | -5.90  | 2.98  | 4.79E-02 | -12.96 | 6.06  | 3.26E-02 | -0.77   | 8.28   | 9.26E-01 | -6.08  | 4.20  | 1.48E-01 | 3.06   | 8.38  | 7.15E-01 |
| cg02487491 | -14.50 | 7.33  | 4.79E-02 | 5.07   | 13.79 | 7.13E-01 | -2.68   | 27.47  | 9.22E-01 | -19.49 | 6.77  | 3.97E-03 | -34.38 | 20.41 | 9.22E-02 |
| cg15809217 | 6.17   | 3.12  | 4.79E-02 | 4.12   | 4.26  | 3.34E-01 | 9.07    | 6.93   | 1.90E-01 | 10.20  | 9.18  | 2.66E-01 | 6.45   | 8.12  | 4.27E-01 |
| cg08891123 | -11.47 | 5.79  | 4.79E-02 | -7.35  | 10.59 | 4.88E-01 | 12.09   | 17.40  | 4.87E-01 | -13.23 | 7.32  | 7.09E-02 | -27.18 | 13.31 | 4.12E-02 |
| cg16483916 | 11.59  | 5.86  | 4.79E-02 | 20.86  | 11.01 | 5.83E-02 | 14.97   | 16.46  | 3.63E-01 | 11.99  | 9.53  | 2.08E-01 | -3.50  | 12.73 | 7.83E-01 |
| cg25017777 | 6.21   | 3.14  | 4.79E-02 | 5.14   | 3.99  | 1.97E-01 | 18.22   | 8.20   | 2.62E-02 | 5.05   | 8.63  | 5.59E-01 | -1.91  | 9.15  | 8.35E-01 |
| cg27204739 | 27.12  | 13.71 | 4.79E-02 | 22.05  | 17.55 | 2.09E-01 | -33.51  | 64.10  | 6.01E-01 | 32.88  | 50.26 | 5.13E-01 | 47.25  | 26.38 | 7.33E-02 |
| cg10972873 | 25.21  | 12.74 | 4.79E-02 | 10.39  | 15.02 | 4.89E-01 | 36.26   | 37.00  | 3.27E-01 | 94.51  | 49.21 | 5.48E-02 | 36.20  | 24.52 | 1.40E-01 |
| cg02853154 | -9.82  | 4.96  | 4.79E-02 | -11.83 | 11.81 | 3.17E-01 | -3.19   | 21.04  | 8.79E-01 | -11.34 | 6.01  | 5.90E-02 | 2.24   | 17.04 | 8.96E-01 |
| cg01083584 | 14.03  | 7.09  | 4.79E-02 | 31.77  | 13.87 | 2.20E-02 | -2.91   | 15.46  | 8.51E-01 | 12.43  | 12.40 | 3.16E-01 | 11.31  | 15.81 | 4.74E-01 |
| cg07975585 | 12.32  | 6.23  | 4.79E-02 | 10.04  | 14.02 | 4.74E-01 | -16.34  | 22.78  | 4.73E-01 | 18.19  | 7.88  | 2.11E-02 | 2.04   | 19.33 | 9.16E-01 |
| cg16577665 | 14.24  | 7.20  | 4.79E-02 | 14.78  | 15.01 | 3.25E-01 | 14.84   | 32.68  | 6.50E-01 | 14.27  | 9.22  | 1.22E-01 | 12.72  | 21.58 | 5.56E-01 |
| cg01572434 | -12.25 | 6.19  | 4.79E-02 | -3.34  | 16.19 | 8.36E-01 | -1.74   | 26.39  | 9.47E-01 | -15.44 | 7.27  | 3.36E-02 | -6.28  | 22.81 | 7.83E-01 |
| cg02319466 | -7.07  | 3.57  | 4.79E-02 | -0.62  | 6.90  | 9.28E-01 | -9.44   | 7.92   | 2.33E-01 | -7.39  | 5.33  | 1.66E-01 | -20.85 | 12.67 | 9.98E-02 |
| cg24053664 | 5.50   | 2.78  | 4.79E-02 | 1.45   | 4.66  | 7.55E-01 | 4.89    | 6.38   | 4.43E-01 | 9.10   | 5.51  | 9.86E-02 | 8.70   | 6.22  | 1.62E-01 |
| cg02943578 | 17.57  | 8.88  | 4.79E-02 | 23.50  | 20.33 | 2.48E-01 | 26.82   | 26.69  | 3.15E-01 | 20.53  | 12.35 | 9.63E-02 | -2.80  | 20.88 | 8.93E-01 |
| cg23782833 | -12.79 | 6.46  | 4.79E-02 | -15.43 | 9.86  | 1.17E-01 | 8.16    | 18.21  | 6.54E-01 | -10.67 | 13.83 | 4.40E-01 | -21.53 | 13.63 | 1.14E-01 |
| cg24219734 | -28.30 | 14.30 | 4.79E-02 | 48.32  | 47.21 | 3.06E-01 | -6.36   | 148.96 | 9.66E-01 | -37.47 | 15.43 | 1.52E-02 | -23.75 | 51.45 | 6.44E-01 |
| cg16092773 | 14.76  | 7.46  | 4.79E-02 | 33.77  | 16.60 | 4.19E-02 | -31.22  | 70.74  | 6.59E-01 | 9.61   | 8.85  | 2.78E-01 | 19.13  | 27.02 | 4.79E-01 |
| cg00967711 | -10.93 | 5.52  | 4.79E-02 | -13.80 | 11.65 | 2.36E-01 | -8.34   | 14.18  | 5.56E-01 | -12.24 | 8.25  | 1.38E-01 | -6.13  | 13.18 | 6.42E-01 |
| cg20802509 | -18.33 | 9.27  | 4.79E-02 | -7.67  | 26.23 | 7.70E-01 | 40.50   | 40.28  | 3.15E-01 | -24.42 | 10.65 | 2.19E-02 | -15.82 | 36.28 | 6.63E-01 |
| cg00907505 | -17.85 | 9.02  | 4.79E-02 | -22.13 | 11.97 | 6.44E-02 | -8.18   | 34.55  | 8.13E-01 | -18.94 | 29.38 | 5.19E-01 | -10.86 | 17.40 | 5.32E-01 |
| cg08937613 | 12.36  | 6.25  | 4.79E-02 | 0.85   | 19.82 | 9.66E-01 | 4.90    | 22.02  | 8.24E-01 | 15.84  | 7.13  | 2.63E-02 | -5.64  | 27.46 | 8.37E-01 |

|            |        |       |          |        |       |          |         |        |          |         |       |          |         |       |          |
|------------|--------|-------|----------|--------|-------|----------|---------|--------|----------|---------|-------|----------|---------|-------|----------|
| cg17953816 | 8.81   | 4.46  | 4.79E-02 | 9.60   | 6.40  | 1.34E-01 | 9.41    | 9.99   | 3.46E-01 | 12.16   | 10.81 | 2.61E-01 | 1.50    | 11.67 | 8.98E-01 |
| cg08146733 | 7.54   | 3.81  | 4.79E-02 | 2.34   | 5.31  | 6.60E-01 | 11.43   | 10.03  | 2.54E-01 | 12.81   | 9.12  | 1.60E-01 | 14.78   | 9.36  | 1.14E-01 |
| cg19547976 | -64.61 | 32.67 | 4.79E-02 | -48.49 | 34.48 | 1.60E-01 | 122.18  | 118.09 | 3.01E-01 | -100.49 | 60.02 | 9.41E-02 | -120.39 | 60.15 | 4.53E-02 |
| cg07709475 | -13.30 | 6.72  | 4.79E-02 | -5.29  | 18.55 | 7.75E-01 | -7.88   | 18.78  | 6.75E-01 | -19.51  | 8.18  | 1.71E-02 | 24.80   | 26.52 | 3.50E-01 |
| cg05585475 | -7.50  | 3.79  | 4.79E-02 | -11.07 | 10.28 | 2.82E-01 | 1.00    | 19.11  | 9.58E-01 | -5.53   | 4.58  | 2.28E-01 | -16.10  | 10.14 | 1.12E-01 |
| cg16717549 | 6.53   | 3.30  | 4.79E-02 | 3.60   | 4.26  | 3.99E-01 | 7.48    | 8.99   | 4.05E-01 | 9.42    | 10.65 | 3.76E-01 | 14.48   | 8.01  | 7.07E-02 |
| cg00559935 | 13.02  | 6.58  | 4.79E-02 | 18.01  | 13.13 | 1.70E-01 | 1.12    | 17.33  | 9.49E-01 | 10.46   | 9.73  | 2.82E-01 | 24.09   | 17.17 | 1.61E-01 |
| cg01804281 | -9.04  | 4.57  | 4.79E-02 | -17.49 | 11.49 | 1.28E-01 | -13.55  | 18.97  | 4.75E-01 | -6.19   | 5.48  | 2.58E-01 | -13.39  | 15.42 | 3.85E-01 |
| cg08629379 | -10.51 | 5.32  | 4.80E-02 | -13.47 | 12.28 | 2.73E-01 | -3.81   | 15.86  | 8.10E-01 | -10.09  | 6.98  | 1.48E-01 | -14.26  | 15.36 | 3.53E-01 |
| cg19741456 | -30.19 | 15.26 | 4.80E-02 | -87.69 | 40.94 | 3.22E-02 | -163.96 | 236.03 | 4.87E-01 | -19.77  | 17.13 | 2.49E-01 | -25.69  | 60.70 | 6.72E-01 |
| cg07051721 | 8.69   | 4.39  | 4.80E-02 | 17.09  | 5.18  | 9.65E-04 | 10.64   | 8.36   | 2.03E-01 | -0.14   | 7.45  | 9.85E-01 | 2.38    | 8.03  | 7.67E-01 |
| cg06085985 | 21.62  | 10.93 | 4.80E-02 | 25.14  | 15.34 | 1.01E-01 | -4.64   | 29.22  | 8.74E-01 | 11.12   | 31.18 | 7.21E-01 | 35.48   | 22.83 | 1.20E-01 |
| cg09766556 | -7.11  | 3.59  | 4.80E-02 | -9.97  | 8.79  | 2.57E-01 | -2.43   | 15.71  | 8.77E-01 | -7.42   | 4.43  | 9.36E-02 | -3.48   | 10.29 | 7.35E-01 |
| cg13821077 | 6.48   | 3.28  | 4.80E-02 | 3.95   | 6.23  | 5.26E-01 | 8.33    | 8.98   | 3.54E-01 | 8.90    | 5.08  | 7.96E-02 | 3.29    | 7.84  | 6.74E-01 |
| cg02068237 | 16.23  | 8.21  | 4.80E-02 | 14.07  | 14.13 | 3.19E-01 | 6.51    | 15.39  | 6.72E-01 | 20.24   | 17.23 | 2.40E-01 | 33.25   | 21.08 | 1.15E-01 |
| cg24423806 | 7.40   | 3.74  | 4.80E-02 | 6.01   | 4.11  | 1.44E-01 | 17.52   | 6.76   | 9.56E-03 | 5.09    | 11.94 | 6.70E-01 | -2.34   | 8.63  | 7.87E-01 |
| cg00562151 | -31.69 | 16.02 | 4.80E-02 | -44.90 | 23.75 | 5.87E-02 | -15.43  | 45.30  | 7.33E-01 | -44.46  | 40.34 | 2.70E-01 | -8.80   | 31.30 | 7.78E-01 |
| cg23512558 | -29.18 | 14.75 | 4.80E-02 | -24.44 | 16.51 | 1.39E-01 | -87.56  | 85.36  | 3.05E-01 | -25.61  | 74.20 | 7.30E-01 | -45.62  | 40.53 | 2.60E-01 |
| cg07148880 | -41.36 | 20.91 | 4.80E-02 | -52.72 | 58.69 | 3.69E-01 | -177.66 | 276.17 | 5.20E-01 | -39.02  | 23.97 | 1.04E-01 | -37.20  | 64.14 | 5.62E-01 |
| cg15525848 | 7.36   | 3.72  | 4.80E-02 | 7.32   | 4.96  | 1.40E-01 | 8.64    | 8.55   | 3.13E-01 | 10.87   | 11.26 | 3.34E-01 | 3.01    | 10.01 | 7.64E-01 |
| cg04991805 | 14.17  | 7.17  | 4.80E-02 | 23.33  | 12.68 | 6.57E-02 | 13.98   | 20.74  | 5.00E-01 | 5.20    | 17.60 | 7.68E-01 | 10.59   | 11.39 | 3.53E-01 |
| cg01212245 | -19.84 | 10.03 | 4.80E-02 | -28.77 | 15.13 | 5.72E-02 | -28.53  | 29.25  | 3.29E-01 | -4.36   | 7.68  | 5.70E-01 | -44.96  | 21.48 | 3.63E-02 |
| cg24316255 | 15.54  | 7.86  | 4.80E-02 | 15.51  | 18.60 | 4.04E-01 | 62.39   | 28.25  | 2.72E-02 | 9.88    | 7.47  | 1.86E-01 | 21.04   | 27.92 | 4.51E-01 |
| cg18436758 | 8.38   | 4.24  | 4.80E-02 | 11.58  | 7.64  | 1.30E-01 | -0.04   | 8.57   | 9.96E-01 | 12.23   | 9.15  | 1.81E-01 | 9.45    | 8.78  | 2.82E-01 |
| cg06731865 | 11.56  | 5.85  | 4.80E-02 | 10.28  | 8.46  | 2.25E-01 | 21.45   | 12.58  | 8.81E-02 | 10.21   | 17.74 | 5.65E-01 | 4.61    | 13.14 | 7.26E-01 |
| cg02707840 | -15.86 | 8.02  | 4.80E-02 | -48.26 | 20.24 | 1.71E-02 | -20.70  | 31.09  | 5.06E-01 | -9.43   | 8.22  | 2.51E-01 | -9.43   | 22.67 | 6.77E-01 |
| cg04723534 | 5.81   | 2.94  | 4.80E-02 | 8.92   | 3.99  | 2.53E-02 | 5.62    | 6.64   | 3.98E-01 | 1.46    | 8.57  | 8.65E-01 | -2.19   | 7.81  | 7.79E-01 |
| cg09101258 | -11.65 | 5.89  | 4.80E-02 | -22.58 | 9.72  | 2.02E-02 | -10.59  | 13.83  | 4.44E-01 | -2.34   | 12.54 | 8.52E-01 | -3.98   | 12.27 | 7.45E-01 |
| cg27143370 | 11.99  | 6.06  | 4.80E-02 | 9.49   | 8.96  | 2.89E-01 | 27.58   | 16.22  | 8.89E-02 | 19.31   | 18.60 | 2.99E-01 | 5.87    | 11.15 | 5.99E-01 |
| cg21531685 | -13.23 | 6.69  | 4.80E-02 | -22.38 | 12.69 | 7.78E-02 | -10.77  | 20.14  | 5.93E-01 | -5.52   | 9.79  | 5.73E-01 | -22.42  | 17.59 | 2.02E-01 |
| cg22240880 | 24.09  | 12.18 | 4.80E-02 | 35.79  | 17.53 | 4.12E-02 | 31.60   | 26.58  | 2.34E-01 | -6.25   | 31.04 | 8.40E-01 | 7.41    | 31.12 | 8.12E-01 |
| cg04208853 | 10.87  | 5.50  | 4.80E-02 | 24.38  | 14.61 | 9.51E-02 | 30.19   | 20.35  | 1.38E-01 | 7.08    | 6.41  | 2.70E-01 | 0.33    | 24.40 | 9.89E-01 |
| cg06303282 | -9.97  | 5.04  | 4.80E-02 | -18.09 | 11.73 | 1.23E-01 | -9.59   | 24.04  | 6.90E-01 | -8.54   | 6.12  | 1.63E-01 | -4.38   | 16.65 | 7.92E-01 |
| cg25578830 | -11.67 | 5.90  | 4.80E-02 | -7.68  | 15.33 | 6.16E-01 | -32.63  | 20.35  | 1.09E-01 | -10.83  | 7.09  | 1.27E-01 | -3.74   | 21.67 | 8.63E-01 |
| cg17158913 | 7.96   | 4.03  | 4.80E-02 | 7.67   | 5.74  | 1.81E-01 | 1.36    | 8.54   | 8.74E-01 | 21.12   | 13.96 | 1.30E-01 | 10.50   | 8.95  | 2.41E-01 |

|            |        |       |          |        |       |          |         |        |          |         |       |          |        |       |          |
|------------|--------|-------|----------|--------|-------|----------|---------|--------|----------|---------|-------|----------|--------|-------|----------|
| cg06875318 | -28.96 | 14.64 | 4.80E-02 | -34.96 | 21.73 | 1.08E-01 | -26.76  | 37.65  | 4.77E-01 | -24.07  | 36.13 | 5.05E-01 | -22.04 | 30.54 | 4.70E-01 |
| cg15864104 | 47.19  | 23.87 | 4.80E-02 | 38.98  | 38.55 | 3.12E-01 | 33.80   | 103.31 | 7.44E-01 | 76.72   | 46.26 | 9.72E-02 | 33.73  | 43.78 | 4.41E-01 |
| cg20618695 | 7.67   | 3.88  | 4.80E-02 | 11.55  | 5.23  | 2.73E-02 | 4.30    | 9.93   | 6.65E-01 | 16.55   | 15.73 | 2.93E-01 | -1.40  | 7.95  | 8.60E-01 |
| cg00652332 | -23.73 | 12.00 | 4.80E-02 | -32.22 | 16.59 | 5.21E-02 | -37.66  | 54.93  | 4.93E-01 | -30.01  | 37.12 | 4.19E-01 | -5.97  | 21.06 | 7.77E-01 |
| cg16545743 | 8.42   | 4.26  | 4.80E-02 | 5.05   | 6.83  | 4.60E-01 | 16.98   | 10.88  | 1.19E-01 | 6.18    | 7.24  | 3.93E-01 | 15.28  | 12.69 | 2.29E-01 |
| cg26438105 | -5.10  | 2.58  | 4.80E-02 | -2.99  | 3.78  | 4.28E-01 | -6.52   | 5.51   | 2.37E-01 | -0.76   | 7.39  | 9.18E-01 | -11.26 | 5.86  | 5.45E-02 |
| cg10153349 | 7.49   | 3.79  | 4.80E-02 | 7.74   | 5.40  | 1.52E-01 | 9.81    | 8.41   | 2.44E-01 | 7.67    | 11.47 | 5.04E-01 | 4.36   | 8.59  | 6.12E-01 |
| cg16756442 | 14.48  | 7.32  | 4.80E-02 | 19.06  | 15.52 | 2.19E-01 | 26.70   | 27.52  | 3.32E-01 | 11.40   | 9.49  | 2.30E-01 | 14.00  | 21.98 | 5.24E-01 |
| cg19226647 | 48.37  | 24.47 | 4.80E-02 | 19.98  | 27.56 | 4.68E-01 | -37.73  | 136.56 | 7.82E-01 | 129.96  | 61.70 | 3.52E-02 | 69.82  | 41.40 | 9.17E-02 |
| cg02504521 | -29.88 | 15.11 | 4.80E-02 | -22.96 | 16.71 | 1.69E-01 | -23.05  | 67.99  | 7.35E-01 | -103.55 | 99.14 | 2.96E-01 | -68.98 | 45.66 | 1.31E-01 |
| cg25881193 | -41.10 | 20.79 | 4.80E-02 | -31.25 | 26.37 | 2.36E-01 | -127.97 | 66.50  | 5.43E-02 | 0.71    | 76.10 | 9.93E-01 | -44.76 | 45.78 | 3.28E-01 |
| cg16632159 | -7.71  | 3.90  | 4.80E-02 | -6.42  | 5.28  | 2.24E-01 | -13.76  | 8.99   | 1.26E-01 | -7.68   | 13.23 | 5.62E-01 | -5.32  | 9.22  | 5.64E-01 |
| cg27486692 | -8.30  | 4.20  | 4.80E-02 | -8.05  | 9.46  | 3.95E-01 | -30.12  | 18.01  | 9.44E-02 | -6.91   | 5.21  | 1.85E-01 | -5.98  | 13.38 | 6.55E-01 |
| cg08404028 | 15.56  | 7.87  | 4.80E-02 | 8.90   | 21.72 | 6.82E-01 | 12.28   | 28.15  | 6.63E-01 | 15.20   | 10.59 | 1.51E-01 | 21.16  | 16.14 | 1.90E-01 |
| cg07283816 | 5.76   | 2.91  | 4.80E-02 | 11.78  | 5.45  | 3.06E-02 | 2.49    | 6.86   | 7.17E-01 | 4.72    | 4.71  | 3.17E-01 | 0.94   | 7.46  | 9.00E-01 |
| cg15345437 | -6.77  | 3.42  | 4.80E-02 | -7.97  | 5.48  | 1.46E-01 | -13.30  | 13.50  | 3.25E-01 | -4.12   | 5.40  | 4.45E-01 | -8.01  | 9.05  | 3.76E-01 |
| cg09614810 | -7.69  | 3.89  | 4.80E-02 | -6.83  | 9.89  | 4.90E-01 | -10.84  | 14.33  | 4.50E-01 | -7.62   | 4.76  | 1.10E-01 | -7.16  | 11.96 | 5.50E-01 |
| cg21661983 | -8.75  | 4.42  | 4.81E-02 | -0.19  | 11.11 | 9.86E-01 | -7.38   | 13.91  | 5.95E-01 | -11.47  | 5.39  | 3.32E-02 | -3.49  | 17.33 | 8.41E-01 |
| cg22164207 | -10.14 | 5.13  | 4.81E-02 | -10.63 | 7.99  | 1.83E-01 | 5.78    | 11.86  | 6.26E-01 | -13.64  | 11.33 | 2.29E-01 | -20.62 | 11.58 | 7.50E-02 |
| cg06293611 | 8.63   | 4.36  | 4.81E-02 | 5.38   | 6.81  | 4.30E-01 | 12.66   | 9.29   | 1.73E-01 | 10.25   | 9.26  | 2.69E-01 | 9.18   | 11.37 | 4.19E-01 |
| cg17611674 | 12.10  | 6.12  | 4.81E-02 | 21.88  | 11.01 | 4.69E-02 | 7.91    | 17.81  | 6.57E-01 | 8.13    | 12.43 | 5.13E-01 | 7.36   | 10.64 | 4.89E-01 |
| cg10854423 | -7.82  | 3.96  | 4.81E-02 | -12.06 | 8.99  | 1.80E-01 | -8.62   | 10.49  | 4.11E-01 | -4.75   | 5.51  | 3.88E-01 | -12.23 | 10.30 | 2.35E-01 |
| cg09800500 | -6.18  | 3.13  | 4.81E-02 | -7.87  | 4.34  | 6.94E-02 | -1.32   | 7.97   | 8.69E-01 | -6.69   | 8.94  | 4.54E-01 | -5.23  | 6.93  | 4.50E-01 |
| cg00995986 | 11.10  | 5.62  | 4.81E-02 | 9.53   | 7.45  | 2.00E-01 | 14.80   | 14.84  | 3.19E-01 | 16.11   | 23.82 | 4.99E-01 | 11.46  | 11.65 | 3.25E-01 |
| cg03238075 | -35.21 | 17.81 | 4.81E-02 | -49.03 | 24.28 | 4.34E-02 | 13.15   | 88.23  | 8.82E-01 | -46.47  | 36.77 | 2.06E-01 | 8.34   | 41.28 | 8.40E-01 |
| cg08896420 | 9.96   | 5.04  | 4.81E-02 | 6.07   | 6.97  | 3.84E-01 | 16.94   | 10.79  | 1.16E-01 | 18.13   | 15.82 | 2.52E-01 | 7.91   | 12.63 | 5.31E-01 |
| cg20720686 | 4.83   | 2.44  | 4.81E-02 | 4.68   | 3.16  | 1.38E-01 | 10.66   | 6.42   | 9.69E-02 | 2.54    | 6.62  | 7.01E-01 | 1.13   | 7.05  | 8.72E-01 |
| cg07701837 | -8.28  | 4.19  | 4.81E-02 | -15.36 | 9.19  | 9.48E-02 | -5.82   | 15.20  | 7.02E-01 | -6.30   | 5.35  | 2.39E-01 | -7.65  | 13.09 | 5.59E-01 |
| cg02096633 | 25.25  | 12.77 | 4.81E-02 | 31.59  | 18.49 | 8.76E-02 | 48.56   | 47.86  | 3.10E-01 | 25.81   | 26.20 | 3.25E-01 | 2.71   | 27.62 | 9.22E-01 |
| cg04522625 | -7.67  | 3.88  | 4.81E-02 | -7.79  | 9.29  | 4.01E-01 | 4.42    | 15.62  | 7.77E-01 | -8.88   | 4.74  | 6.12E-02 | -6.78  | 12.65 | 5.92E-01 |
| cg00763555 | -24.73 | 12.51 | 4.81E-02 | -27.88 | 15.91 | 7.97E-02 | -37.80  | 39.49  | 3.38E-01 | 16.41   | 38.66 | 6.71E-01 | -30.67 | 29.78 | 3.03E-01 |
| cg07020596 | -7.45  | 3.77  | 4.81E-02 | -7.20  | 7.42  | 3.32E-01 | -8.11   | 10.80  | 4.52E-01 | -8.11   | 5.40  | 1.33E-01 | -4.89  | 10.35 | 6.36E-01 |
| cg21046874 | -24.73 | 12.51 | 4.81E-02 | -34.54 | 23.49 | 1.41E-01 | -17.55  | 46.12  | 7.04E-01 | -15.62  | 18.37 | 3.95E-01 | -35.82 | 29.64 | 2.27E-01 |
| cg26091131 | 10.67  | 5.40  | 4.81E-02 | 11.23  | 7.40  | 1.29E-01 | 17.23   | 11.84  | 1.45E-01 | 9.03    | 18.54 | 6.26E-01 | 2.02   | 12.85 | 8.75E-01 |
| cg09710363 | -12.26 | 6.20  | 4.81E-02 | -32.49 | 21.62 | 1.33E-01 | 16.32   | 27.42  | 5.52E-01 | -12.68  | 6.84  | 6.38E-02 | 0.03   | 29.25 | 9.99E-01 |



|                |        |       |          |        |       |          |        |        |          |        |       |          |         |       |          |
|----------------|--------|-------|----------|--------|-------|----------|--------|--------|----------|--------|-------|----------|---------|-------|----------|
| cg04095070     | -8.49  | 4.29  | 4.81E-02 | -7.57  | 7.17  | 2.91E-01 | -8.28  | 12.25  | 4.99E-01 | -14.98 | 5.58  | 7.29E-03 | 6.09    | 9.81  | 5.35E-01 |
| cg06154313     | 12.47  | 6.31  | 4.81E-02 | 6.22   | 7.41  | 4.01E-01 | 0.09   | 12.13  | 9.94E-01 | 22.98  | 16.32 | 1.59E-01 | 27.22   | 10.60 | 1.02E-02 |
| cg06483559     | -13.15 | 6.65  | 4.81E-02 | -12.58 | 10.06 | 2.11E-01 | -17.45 | 14.60  | 2.32E-01 | -13.65 | 20.60 | 5.08E-01 | -10.38  | 13.28 | 4.35E-01 |
| cg12962021     | 13.29  | 6.73  | 4.81E-02 | 13.39  | 7.36  | 6.89E-02 | 18.11  | 42.02  | 6.67E-01 | 33.85  | 37.50 | 3.67E-01 | 5.24    | 20.54 | 7.99E-01 |
| cg00546897     | 9.21   | 4.66  | 4.81E-02 | 8.19   | 5.83  | 1.60E-01 | 13.51  | 12.04  | 2.62E-01 | 11.55  | 15.49 | 4.56E-01 | 7.50    | 13.42 | 5.76E-01 |
| cg03051384     | 17.59  | 8.90  | 4.81E-02 | 19.66  | 17.16 | 2.52E-01 | 17.98  | 41.83  | 6.67E-01 | 17.77  | 11.86 | 1.34E-01 | 12.07   | 25.37 | 6.34E-01 |
| cg21037604     | 17.71  | 8.96  | 4.81E-02 | 25.96  | 11.77 | 2.74E-02 | 13.77  | 27.18  | 6.12E-01 | -7.11  | 42.59 | 8.67E-01 | 5.52    | 17.32 | 7.50E-01 |
| cg15286037     | -12.62 | 6.38  | 4.81E-02 | -27.97 | 12.18 | 2.16E-02 | -17.90 | 16.59  | 2.81E-01 | -3.42  | 5.73  | 5.51E-01 | -18.69  | 15.39 | 2.25E-01 |
| cg17816394     | 18.19  | 9.20  | 4.81E-02 | 5.06   | 25.82 | 8.45E-01 | 31.28  | 38.09  | 4.11E-01 | 13.96  | 11.90 | 2.41E-01 | 34.01   | 19.77 | 8.53E-02 |
| cg03655527     | -14.49 | 7.33  | 4.81E-02 | -9.90  | 15.58 | 5.25E-01 | -19.67 | 22.01  | 3.71E-01 | -22.62 | 10.08 | 2.49E-02 | 13.26   | 19.67 | 5.00E-01 |
| cg00924909     | 12.39  | 6.27  | 4.81E-02 | 6.52   | 11.35 | 5.66E-01 | 27.60  | 12.81  | 3.11E-02 | 1.48   | 12.20 | 9.03E-01 | 17.78   | 14.35 | 2.15E-01 |
| cg14089984     | 12.20  | 6.17  | 4.81E-02 | 3.29   | 15.47 | 8.32E-01 | -16.76 | 56.44  | 7.67E-01 | 14.77  | 7.21  | 4.04E-02 | 10.93   | 19.98 | 5.84E-01 |
| cg01053273     | 8.98   | 4.54  | 4.81E-02 | 9.32   | 6.69  | 1.64E-01 | 1.57   | 10.52  | 8.82E-01 | 21.45  | 15.47 | 1.66E-01 | 9.54    | 8.81  | 2.79E-01 |
| cg03731898     | -10.93 | 5.53  | 4.81E-02 | -10.09 | 12.56 | 4.22E-01 | -22.14 | 22.44  | 3.24E-01 | -9.12  | 7.13  | 2.01E-01 | -14.86  | 14.55 | 3.07E-01 |
| cg24058365     | 4.23   | 2.14  | 4.81E-02 | 4.69   | 3.08  | 1.28E-01 | 8.91   | 5.15   | 8.35E-02 | 1.65   | 4.42  | 7.09E-01 | 0.34    | 6.47  | 9.58E-01 |
| cg16793525     | 9.48   | 4.80  | 4.81E-02 | 16.70  | 8.71  | 5.52E-02 | 5.00   | 9.87   | 6.13E-01 | 11.09  | 9.02  | 2.19E-01 | 0.56    | 11.37 | 9.61E-01 |
| cg16367786     | -9.70  | 4.91  | 4.81E-02 | -19.94 | 8.12  | 1.40E-02 | -8.00  | 11.76  | 4.97E-01 | -0.32  | 9.64  | 9.74E-01 | -4.65   | 10.96 | 6.71E-01 |
| cg04623371     | 39.19  | 19.83 | 4.81E-02 | 38.96  | 26.41 | 1.40E-01 | 57.62  | 81.94  | 4.82E-01 | 68.09  | 71.93 | 3.44E-01 | 28.76   | 36.11 | 4.26E-01 |
| ch.10.2770541R | -45.37 | 22.96 | 4.81E-02 | -19.91 | 20.59 | 3.34E-01 | -42.53 | 107.16 | 6.91E-01 | -88.43 | 96.58 | 3.60E-01 | -102.67 | 41.44 | 1.32E-02 |
| cg00864424     | 18.64  | 9.43  | 4.81E-02 | 14.36  | 12.47 | 2.49E-01 | 36.11  | 27.38  | 1.87E-01 | 28.88  | 38.55 | 4.54E-01 | 17.66   | 18.87 | 3.49E-01 |
| cg10088519     | 24.12  | 12.20 | 4.81E-02 | 49.15  | 32.71 | 1.33E-01 | -60.17 | 169.07 | 7.22E-01 | 19.60  | 14.49 | 1.76E-01 | 25.23   | 31.95 | 4.30E-01 |
| cg12341047     | 20.58  | 10.41 | 4.81E-02 | 5.09   | 8.66  | 5.57E-01 | 42.95  | 18.26  | 1.87E-02 | 44.50  | 23.32 | 5.64E-02 | 12.69   | 17.14 | 4.59E-01 |
| cg12990410     | -4.65  | 2.36  | 4.81E-02 | -7.48  | 3.25  | 2.15E-02 | -1.68  | 4.52   | 7.10E-01 | -8.55  | 4.03  | 3.36E-02 | 1.91    | 4.69  | 6.85E-01 |
| cg12877781     | -18.79 | 9.51  | 4.81E-02 | -23.20 | 20.56 | 2.59E-01 | -31.38 | 45.45  | 4.90E-01 | -22.44 | 12.43 | 7.11E-02 | 4.27    | 23.96 | 8.59E-01 |
| cg08982904     | 15.36  | 7.77  | 4.81E-02 | 21.94  | 10.17 | 3.10E-02 | -4.08  | 18.68  | 8.27E-01 | -11.84 | 27.57 | 6.68E-01 | 25.66   | 19.22 | 1.82E-01 |
| cg00318243     | 14.57  | 7.37  | 4.81E-02 | 28.79  | 17.07 | 9.17E-02 | 21.10  | 38.21  | 5.81E-01 | 13.81  | 8.82  | 1.17E-01 | -16.10  | 26.56 | 5.44E-01 |
| cg07917406     | 28.33  | 14.34 | 4.82E-02 | 56.11  | 34.79 | 1.07E-01 | 221.79 | 219.47 | 3.12E-01 | 19.59  | 16.61 | 2.38E-01 | 40.25   | 50.34 | 4.24E-01 |
| cg08865640     | 16.07  | 8.13  | 4.82E-02 | 41.60  | 21.04 | 4.80E-02 | 30.60  | 34.92  | 3.81E-01 | 10.99  | 9.53  | 2.49E-01 | 2.70    | 31.32 | 9.31E-01 |
| cg01520122     | -12.31 | 6.23  | 4.82E-02 | -34.56 | 14.84 | 1.98E-02 | -8.44  | 25.02  | 7.36E-01 | -6.37  | 7.88  | 4.19E-01 | -12.56  | 16.87 | 4.57E-01 |
| cg10794502     | -12.14 | 6.14  | 4.82E-02 | -31.52 | 11.08 | 4.43E-03 | 2.54   | 17.79  | 8.86E-01 | -8.61  | 6.03  | 1.53E-01 | -6.74   | 11.13 | 5.44E-01 |
| cg07824483     | 4.77   | 2.42  | 4.82E-02 | 3.63   | 2.81  | 1.97E-01 | 10.15  | 6.35   | 1.10E-01 | 2.19   | 11.73 | 8.52E-01 | 7.11    | 8.79  | 4.19E-01 |
| cg02432263     | 10.49  | 5.31  | 4.82E-02 | 9.46   | 11.43 | 4.08E-01 | -1.05  | 13.22  | 9.37E-01 | 13.89  | 7.23  | 5.49E-02 | 13.49   | 18.27 | 4.60E-01 |
| cg26722429     | -28.79 | 14.57 | 4.82E-02 | -56.12 | 23.36 | 1.63E-02 | 5.07   | 34.88  | 8.84E-01 | -17.88 | 29.27 | 5.41E-01 | -18.09  | 33.53 | 5.90E-01 |
| cg00992850     | 11.47  | 5.81  | 4.82E-02 | 10.28  | 7.00  | 1.42E-01 | -3.05  | 12.91  | 8.13E-01 | 37.67  | 16.28 | 2.07E-02 | 11.45   | 9.04  | 2.05E-01 |
| cg08902243     | -13.14 | 6.65  | 4.82E-02 | -30.59 | 12.66 | 1.57E-02 | -1.32  | 15.41  | 9.32E-01 | -5.30  | 12.34 | 6.68E-01 | -11.78  | 13.37 | 3.78E-01 |

|            |        |       |          |        |       |          |        |        |          |        |        |          |        |       |          |
|------------|--------|-------|----------|--------|-------|----------|--------|--------|----------|--------|--------|----------|--------|-------|----------|
| cg13194425 | 6.76   | 3.42  | 4.82E-02 | 7.25   | 4.35  | 9.57E-02 | 11.67  | 9.04   | 1.97E-01 | 4.83   | 15.98  | 7.62E-01 | 1.99   | 7.81  | 7.98E-01 |
| cg06677416 | -15.71 | 7.95  | 4.82E-02 | -18.11 | 10.10 | 7.31E-02 | 0.34   | 29.24  | 9.91E-01 | -14.72 | 40.31  | 7.15E-01 | -14.72 | 15.34 | 3.37E-01 |
| cg09417849 | 13.66  | 6.91  | 4.82E-02 | 8.31   | 8.01  | 3.00E-01 | 23.97  | 10.88  | 2.76E-02 | -13.89 | 18.48  | 4.52E-01 | 24.62  | 11.97 | 3.97E-02 |
| cg16657397 | 18.25  | 9.24  | 4.82E-02 | 19.20  | 14.06 | 1.72E-01 | 13.01  | 30.38  | 6.68E-01 | 26.61  | 23.70  | 2.62E-01 | 14.56  | 16.22 | 3.69E-01 |
| cg17415581 | -25.70 | 13.01 | 4.82E-02 | -21.96 | 45.25 | 6.27E-01 | 4.96   | 170.99 | 9.77E-01 | -27.56 | 14.25  | 5.31E-02 | -12.16 | 46.40 | 7.93E-01 |
| cg07879785 | 5.99   | 3.03  | 4.82E-02 | 6.76   | 4.39  | 1.23E-01 | 11.59  | 7.59   | 1.27E-01 | 5.52   | 6.42   | 3.90E-01 | -2.22  | 8.06  | 7.83E-01 |
| cg06001524 | 4.62   | 2.34  | 4.82E-02 | 3.81   | 3.18  | 2.31E-01 | 9.66   | 6.08   | 1.12E-01 | 4.99   | 5.32   | 3.48E-01 | 1.42   | 6.77  | 8.34E-01 |
| cg27658391 | 17.03  | 8.62  | 4.82E-02 | 43.86  | 21.03 | 3.70E-02 | 12.44  | 12.39  | 3.16E-01 | 6.80   | 10.53  | 5.18E-01 | 51.33  | 33.80 | 1.29E-01 |
| cg08380385 | 24.51  | 12.41 | 4.82E-02 | -1.87  | 15.88 | 9.06E-01 | 29.05  | 18.92  | 1.25E-01 | 25.92  | 16.34  | 1.13E-01 | 67.68  | 27.81 | 1.50E-02 |
| cg08108655 | -15.97 | 8.08  | 4.82E-02 | -9.77  | 19.79 | 6.22E-01 | -16.59 | 18.11  | 3.60E-01 | -24.60 | 11.18  | 2.78E-02 | 16.30  | 24.22 | 5.01E-01 |
| cg20065903 | 25.41  | 12.86 | 4.82E-02 | 59.65  | 34.13 | 8.05E-02 | -50.73 | 141.53 | 7.20E-01 | 22.38  | 14.63  | 1.26E-01 | 0.81   | 46.38 | 9.86E-01 |
| cg11721194 | -7.75  | 3.92  | 4.82E-02 | -5.85  | 5.89  | 3.20E-01 | -15.89 | 9.28   | 8.68E-02 | 1.83   | 8.92   | 8.38E-01 | -14.42 | 9.12  | 1.14E-01 |
| cg16588073 | -17.18 | 8.69  | 4.82E-02 | -20.05 | 14.93 | 1.79E-01 | -55.88 | 52.26  | 2.85E-01 | -10.71 | 11.58  | 3.55E-01 | -39.95 | 32.86 | 2.24E-01 |
| cg24410607 | 18.19  | 9.21  | 4.82E-02 | 29.69  | 19.42 | 1.26E-01 | -27.66 | 48.62  | 5.69E-01 | 19.76  | 11.36  | 8.19E-02 | -5.77  | 32.04 | 8.57E-01 |
| cg20126106 | 13.28  | 6.72  | 4.82E-02 | 22.17  | 9.33  | 1.74E-02 | 19.07  | 20.60  | 3.54E-01 | 1.49   | 23.23  | 9.49E-01 | -1.38  | 12.49 | 9.12E-01 |
| cg19342883 | 6.03   | 3.05  | 4.82E-02 | 4.78   | 4.50  | 2.88E-01 | 13.96  | 6.93   | 4.38E-02 | 6.56   | 8.77   | 4.54E-01 | 1.43   | 6.47  | 8.25E-01 |
| cg16983759 | -34.11 | 17.27 | 4.82E-02 | -26.78 | 21.51 | 2.13E-01 | -57.84 | 64.35  | 3.69E-01 | -38.37 | 85.13  | 6.52E-01 | -45.84 | 35.08 | 1.91E-01 |
| cg13442966 | 29.01  | 14.69 | 4.82E-02 | 33.92  | 20.33 | 9.52E-02 | 27.87  | 37.64  | 4.59E-01 | 2.93   | 37.58  | 9.38E-01 | 38.24  | 35.31 | 2.79E-01 |
| cg07709618 | -11.43 | 5.78  | 4.82E-02 | -12.88 | 15.12 | 3.94E-01 | -9.34  | 16.54  | 5.72E-01 | -12.09 | 7.15   | 9.10E-02 | -6.36  | 20.83 | 7.60E-01 |
| cg25897043 | -6.24  | 3.16  | 4.82E-02 | -4.07  | 5.05  | 4.20E-01 | -2.06  | 7.16   | 7.74E-01 | -17.28 | 7.23   | 1.68E-02 | -4.24  | 6.67  | 5.25E-01 |
| cg26077811 | -8.84  | 4.47  | 4.82E-02 | -13.28 | 6.63  | 4.51E-02 | -3.60  | 11.07  | 7.45E-01 | -1.38  | 10.20  | 8.92E-01 | -10.23 | 10.30 | 3.21E-01 |
| cg17677032 | 18.97  | 9.61  | 4.82E-02 | 9.88   | 19.90 | 6.20E-01 | 28.44  | 20.06  | 1.56E-01 | 9.15   | 14.66  | 5.33E-01 | 57.58  | 29.22 | 4.88E-02 |
| cg06055562 | 27.29  | 13.82 | 4.82E-02 | 21.86  | 15.19 | 1.50E-01 | 5.31   | 110.26 | 9.62E-01 | 7.12   | 103.69 | 9.45E-01 | 64.46  | 36.97 | 8.12E-02 |
| cg20548744 | 8.88   | 4.50  | 4.83E-02 | 8.06   | 8.48  | 3.42E-01 | 1.36   | 14.14  | 9.23E-01 | 10.84  | 6.50   | 9.53E-02 | 9.25   | 12.04 | 4.42E-01 |
| cg05420134 | 6.85   | 3.47  | 4.83E-02 | 13.44  | 5.59  | 1.63E-02 | 8.05   | 7.40   | 2.77E-01 | 2.46   | 5.70   | 6.66E-01 | -5.54  | 11.59 | 6.33E-01 |
| cg23510764 | 5.57   | 2.82  | 4.83E-02 | 7.63   | 4.42  | 8.40E-02 | 3.70   | 5.60   | 5.09E-01 | 6.83   | 5.91   | 2.48E-01 | -0.35  | 8.50  | 9.68E-01 |
| cg00905170 | 37.79  | 19.13 | 4.83E-02 | 61.10  | 23.52 | 9.37E-03 | -1.99  | 67.42  | 9.76E-01 | -8.77  | 64.03  | 8.91E-01 | -10.21 | 46.66 | 8.27E-01 |
| cg09807229 | 23.77  | 12.04 | 4.83E-02 | 56.95  | 44.93 | 2.05E-01 | 228.62 | 167.14 | 1.71E-01 | 21.23  | 12.96  | 1.01E-01 | 3.18   | 48.85 | 9.48E-01 |
| cg12349676 | 7.15   | 3.62  | 4.83E-02 | 6.62   | 6.34  | 2.97E-01 | 3.95   | 5.75   | 4.92E-01 | 8.76   | 9.83   | 3.73E-01 | 15.86  | 9.63  | 9.98E-02 |
| cg15813095 | 7.85   | 3.98  | 4.83E-02 | 14.61  | 9.10  | 1.08E-01 | 16.98  | 10.33  | 1.00E-01 | 3.95   | 5.16   | 4.44E-01 | 3.03   | 15.47 | 8.45E-01 |
| cg24317002 | 30.45  | 15.42 | 4.83E-02 | 36.45  | 18.81 | 5.26E-02 | 116.28 | 70.25  | 9.79E-02 | 23.90  | 73.66  | 7.46E-01 | -2.90  | 31.71 | 9.27E-01 |
| cg26775538 | 6.29   | 3.18  | 4.83E-02 | 6.29   | 4.12  | 1.27E-01 | 12.45  | 7.79   | 1.10E-01 | 8.61   | 10.68  | 4.20E-01 | -2.15  | 8.32  | 7.96E-01 |
| cg00451397 | -7.27  | 3.68  | 4.83E-02 | -2.23  | 7.57  | 7.69E-01 | -13.63 | 15.33  | 3.74E-01 | -7.48  | 4.92   | 1.28E-01 | -12.21 | 9.70  | 2.08E-01 |
| cg25246543 | 26.18  | 13.26 | 4.83E-02 | 18.98  | 17.04 | 2.65E-01 | -14.82 | 73.71  | 8.41E-01 | 83.74  | 58.60  | 1.53E-01 | 34.96  | 23.75 | 1.41E-01 |
| cg07817505 | -11.12 | 5.63  | 4.83E-02 | -20.10 | 8.71  | 2.11E-02 | -2.73  | 12.05  | 8.21E-01 | -1.22  | 17.12  | 9.43E-01 | -7.82  | 11.12 | 4.82E-01 |

|            |        |       |          |        |       |          |        |        |          |         |       |          |        |       |          |
|------------|--------|-------|----------|--------|-------|----------|--------|--------|----------|---------|-------|----------|--------|-------|----------|
| cg24579377 | -33.60 | 17.02 | 4.83E-02 | -9.61  | 29.36 | 7.43E-01 | -33.99 | 43.30  | 4.32E-01 | -46.99  | 34.67 | 1.75E-01 | -51.38 | 32.83 | 1.18E-01 |
| cg26641920 | 15.01  | 7.60  | 4.83E-02 | 24.75  | 17.72 | 1.62E-01 | 11.28  | 22.13  | 6.10E-01 | 14.54   | 9.71  | 1.34E-01 | 2.57   | 25.95 | 9.21E-01 |
| cg11235921 | -7.97  | 4.04  | 4.83E-02 | -5.82  | 5.87  | 3.21E-01 | -13.56 | 11.20  | 2.26E-01 | -13.63  | 9.32  | 1.44E-01 | -4.31  | 8.83  | 6.25E-01 |
| cg01236063 | 10.28  | 5.21  | 4.83E-02 | 13.97  | 8.03  | 8.19E-02 | -0.07  | 12.93  | 9.96E-01 | 8.35    | 13.67 | 5.41E-01 | 11.79  | 9.98  | 2.38E-01 |
| cg21481775 | 12.72  | 6.44  | 4.83E-02 | 19.53  | 9.65  | 4.30E-02 | -6.12  | 18.65  | 7.43E-01 | 17.03   | 17.09 | 3.19E-01 | 7.95   | 11.90 | 5.04E-01 |
| cg05266226 | 5.24   | 2.65  | 4.83E-02 | 5.01   | 3.54  | 1.57E-01 | 0.13   | 6.36   | 9.84E-01 | 18.57   | 11.23 | 9.84E-02 | 6.55   | 5.81  | 2.59E-01 |
| cg02784696 | -13.03 | 6.60  | 4.83E-02 | -12.32 | 10.88 | 2.58E-01 | -13.74 | 21.38  | 5.20E-01 | -12.25  | 10.53 | 2.45E-01 | -16.46 | 17.33 | 3.42E-01 |
| cg08038178 | -6.33  | 3.21  | 4.83E-02 | -12.91 | 6.31  | 4.09E-02 | -13.35 | 8.92   | 1.35E-01 | -1.08   | 4.55  | 8.12E-01 | -6.10  | 8.75  | 4.85E-01 |
| cg17484944 | -9.66  | 4.89  | 4.83E-02 | -11.55 | 6.94  | 9.62E-02 | -12.80 | 13.17  | 3.31E-01 | -2.25   | 11.45 | 8.44E-01 | -9.56  | 11.44 | 4.03E-01 |
| cg12800105 | -9.08  | 4.60  | 4.83E-02 | -13.65 | 8.83  | 1.22E-01 | -2.23  | 11.46  | 8.46E-01 | -10.50  | 7.37  | 1.54E-01 | -5.19  | 10.93 | 6.35E-01 |
| cg02539984 | 12.50  | 6.33  | 4.83E-02 | 5.33   | 10.72 | 6.19E-01 | 3.64   | 18.28  | 8.42E-01 | 16.92   | 9.53  | 7.58E-02 | 30.41  | 21.10 | 1.50E-01 |
| cg05306745 | 13.24  | 6.71  | 4.83E-02 | 18.30  | 21.57 | 3.96E-01 | 99.30  | 86.11  | 2.49E-01 | 11.92   | 7.51  | 1.13E-01 | 13.71  | 21.19 | 5.18E-01 |
| cg12151446 | 15.08  | 7.64  | 4.83E-02 | 10.55  | 13.00 | 4.17E-01 | 39.15  | 17.94  | 2.91E-02 | 5.86    | 8.54  | 4.93E-01 | 35.35  | 24.20 | 1.44E-01 |
| cg23586121 | -66.08 | 33.47 | 4.83E-02 | -32.62 | 41.00 | 4.26E-01 | 64.31  | 177.70 | 7.17E-01 | -174.31 | 74.26 | 1.89E-02 | -71.89 | 60.72 | 2.36E-01 |
| cg17068138 | -13.67 | 6.93  | 4.83E-02 | -27.86 | 15.58 | 7.38E-02 | -46.24 | 38.08  | 2.25E-01 | -5.84   | 8.61  | 4.98E-01 | -23.44 | 19.81 | 2.37E-01 |
| cg02736280 | 13.22  | 6.69  | 4.83E-02 | 11.14  | 9.16  | 2.24E-01 | 17.52  | 14.45  | 2.25E-01 | 23.09   | 20.51 | 2.60E-01 | 7.23   | 17.58 | 6.81E-01 |
| cg17837191 | 4.47   | 2.26  | 4.83E-02 | 3.53   | 2.81  | 2.08E-01 | 8.86   | 5.66   | 1.17E-01 | 8.26    | 7.49  | 2.70E-01 | 0.00   | 7.19  | 1.00E+00 |
| cg20850582 | 39.33  | 19.92 | 4.83E-02 | 45.81  | 26.07 | 7.89E-02 | 16.09  | 64.30  | 8.02E-01 | 35.94   | 59.84 | 5.48E-01 | 33.71  | 43.53 | 4.39E-01 |
| cg11961813 | 9.68   | 4.90  | 4.83E-02 | 8.38   | 6.95  | 2.28E-01 | 10.45  | 10.88  | 3.37E-01 | 23.58   | 14.68 | 1.08E-01 | 4.04   | 11.32 | 7.21E-01 |
| cg25270498 | 8.93   | 4.52  | 4.83E-02 | 10.16  | 7.21  | 1.59E-01 | 3.31   | 9.30   | 7.22E-01 | 18.53   | 11.59 | 1.10E-01 | 6.10   | 9.69  | 5.29E-01 |
| cg25544073 | -24.90 | 12.61 | 4.83E-02 | -65.73 | 36.77 | 7.38E-02 | 13.01  | 109.20 | 9.05E-01 | -19.11  | 14.20 | 1.78E-01 | -28.17 | 44.36 | 5.25E-01 |
| cg16409049 | 12.39  | 6.27  | 4.83E-02 | 22.69  | 12.66 | 7.31E-02 | 12.53  | 16.01  | 4.34E-01 | 9.43    | 11.75 | 4.22E-01 | 6.98   | 11.16 | 5.32E-01 |
| cg05293738 | 20.46  | 10.36 | 4.83E-02 | 30.15  | 14.53 | 3.80E-02 | 17.00  | 42.97  | 6.92E-01 | 51.87   | 39.22 | 1.86E-01 | 1.42   | 17.19 | 9.34E-01 |
| cg14075221 | 16.24  | 8.22  | 4.83E-02 | 43.51  | 14.62 | 2.91E-03 | 10.92  | 21.20  | 6.06E-01 | 8.20    | 9.82  | 4.04E-01 | 8.22   | 11.07 | 4.58E-01 |
| cg20490126 | 15.86  | 8.03  | 4.83E-02 | 14.34  | 14.22 | 3.13E-01 | 5.71   | 20.33  | 7.79E-01 | 23.12   | 13.46 | 8.59E-02 | 12.79  | 19.52 | 5.12E-01 |
| cg10335543 | 13.47  | 6.82  | 4.83E-02 | 13.39  | 10.03 | 1.82E-01 | -5.66  | 26.90  | 8.33E-01 | 14.38   | 11.50 | 2.11E-01 | 21.29  | 19.60 | 2.77E-01 |
| cg09765089 | 13.55  | 6.86  | 4.83E-02 | 28.04  | 17.60 | 1.11E-01 | 5.52   | 22.11  | 8.03E-01 | 16.01   | 10.20 | 1.16E-01 | 5.04   | 12.55 | 6.88E-01 |
| cg07312552 | 18.48  | 9.36  | 4.83E-02 | 22.95  | 14.96 | 1.25E-01 | -37.86 | 37.21  | 3.09E-01 | 16.89   | 13.73 | 2.18E-01 | 41.03  | 27.62 | 1.37E-01 |
| cg11695266 | 24.93  | 12.63 | 4.83E-02 | 38.30  | 17.77 | 3.11E-02 | 1.39   | 48.02  | 9.77E-01 | 34.93   | 39.91 | 3.82E-01 | 6.12   | 22.13 | 7.82E-01 |
| cg25677261 | 3.86   | 1.96  | 4.83E-02 | 2.61   | 2.83  | 3.57E-01 | 3.17   | 3.89   | 4.14E-01 | 16.15   | 8.18  | 4.85E-02 | 4.20   | 4.25  | 3.23E-01 |
| cg24267828 | 41.75  | 21.15 | 4.84E-02 | 35.90  | 22.62 | 1.12E-01 | 79.44  | 44.36  | 7.33E-02 | 4.59    | 11.31 | 6.85E-01 | 93.18  | 35.07 | 7.89E-03 |
| cg06513139 | 10.29  | 5.21  | 4.84E-02 | -1.55  | 11.50 | 8.93E-01 | 29.47  | 14.91  | 4.81E-02 | 10.70   | 6.70  | 1.10E-01 | 7.84   | 20.17 | 6.98E-01 |
| cg17972213 | -5.97  | 3.02  | 4.84E-02 | -4.31  | 4.13  | 2.96E-01 | -12.84 | 7.11   | 7.07E-02 | -5.77   | 9.17  | 5.29E-01 | -4.04  | 7.23  | 5.76E-01 |
| cg00653312 | -23.92 | 12.12 | 4.84E-02 | -49.30 | 15.23 | 1.21E-03 | -23.44 | 27.19  | 3.89E-01 | -14.20  | 16.63 | 3.93E-01 | 4.64   | 23.53 | 8.44E-01 |
| cg10479434 | -13.94 | 7.06  | 4.84E-02 | -14.58 | 23.52 | 5.35E-01 | -47.43 | 28.19  | 9.25E-02 | -14.04  | 8.00  | 7.92E-02 | 19.19  | 27.18 | 4.80E-01 |

|            |        |       |          |        |       |          |         |        |          |        |       |          |         |       |          |
|------------|--------|-------|----------|--------|-------|----------|---------|--------|----------|--------|-------|----------|---------|-------|----------|
| cg00733567 | -11.40 | 5.77  | 4.84E-02 | -15.88 | 8.91  | 7.49E-02 | -3.33   | 12.81  | 7.95E-01 | -12.63 | 16.71 | 4.50E-01 | -9.90   | 11.37 | 3.84E-01 |
| cg27254338 | -9.29  | 4.71  | 4.84E-02 | -9.37  | 7.75  | 2.27E-01 | -9.81   | 10.67  | 3.58E-01 | -1.32  | 9.99  | 8.94E-01 | -16.92  | 10.15 | 9.56E-02 |
| cg26971420 | 18.69  | 9.47  | 4.84E-02 | 15.23  | 18.51 | 4.11E-01 | 13.26   | 40.92  | 7.46E-01 | 17.57  | 12.49 | 1.60E-01 | 35.29   | 28.46 | 2.15E-01 |
| cg19438469 | -39.48 | 20.00 | 4.84E-02 | -46.58 | 24.47 | 5.70E-02 | -45.49  | 121.27 | 7.08E-01 | 39.22  | 69.45 | 5.72E-01 | -46.80  | 42.47 | 2.70E-01 |
| cg19492047 | 12.77  | 6.47  | 4.84E-02 | 19.63  | 18.91 | 2.99E-01 | -39.33  | 55.56  | 4.79E-01 | 11.31  | 7.72  | 1.43E-01 | 18.30   | 15.80 | 2.47E-01 |
| cg16786581 | -7.89  | 4.00  | 4.84E-02 | -8.93  | 8.01  | 2.65E-01 | 0.46    | 7.97   | 9.54E-01 | -8.76  | 6.49  | 1.77E-01 | -20.50  | 11.55 | 7.59E-02 |
| cg12810325 | -57.18 | 28.97 | 4.84E-02 | -48.65 | 42.54 | 2.53E-01 | -297.37 | 228.86 | 1.94E-01 | -26.33 | 21.54 | 2.22E-01 | -141.18 | 60.17 | 1.90E-02 |
| cg16222850 | -6.05  | 3.07  | 4.84E-02 | -7.25  | 5.75  | 2.07E-01 | 1.91    | 8.19   | 8.15E-01 | -5.05  | 4.45  | 2.56E-01 | -18.58  | 9.70  | 5.55E-02 |
| cg03022891 | 2.26   | 1.14  | 4.84E-02 | 2.34   | 1.64  | 1.55E-01 | 1.57    | 2.46   | 5.24E-01 | -0.79  | 3.57  | 8.24E-01 | 4.37    | 2.56  | 8.82E-02 |
| cg22913933 | -24.16 | 12.24 | 4.84E-02 | -34.35 | 47.34 | 4.68E-01 | -193.20 | 242.88 | 4.26E-01 | -22.94 | 13.02 | 7.81E-02 | -23.48  | 56.42 | 6.77E-01 |
| cg22369318 | -10.79 | 5.46  | 4.84E-02 | -12.33 | 13.87 | 3.74E-01 | 5.88    | 23.98  | 8.06E-01 | -9.75  | 6.43  | 1.29E-01 | -30.37  | 20.65 | 1.41E-01 |
| cg15815827 | 10.09  | 5.11  | 4.84E-02 | 14.37  | 6.93  | 3.81E-02 | 11.20   | 13.20  | 3.96E-01 | 17.90  | 10.76 | 9.62E-02 | -5.92   | 10.19 | 5.61E-01 |
| cg27527108 | -19.47 | 9.86  | 4.84E-02 | -12.47 | 29.57 | 6.73E-01 | -8.88   | 99.52  | 9.29E-01 | -19.44 | 10.95 | 7.57E-02 | -33.04  | 38.17 | 3.87E-01 |
| cg09479134 | -21.14 | 10.71 | 4.84E-02 | -24.77 | 29.92 | 4.08E-01 | -6.97   | 38.40  | 8.56E-01 | -20.10 | 12.51 | 1.08E-01 | -44.31  | 43.51 | 3.08E-01 |
| cg14361132 | -6.52  | 3.31  | 4.84E-02 | -9.78  | 5.46  | 7.33E-02 | 1.92    | 6.36   | 7.63E-01 | -8.29  | 7.57  | 2.74E-01 | -10.85  | 7.94  | 1.72E-01 |
| cg21521949 | 18.07  | 9.15  | 4.84E-02 | 7.27   | 20.94 | 7.28E-01 | 22.80   | 31.41  | 4.68E-01 | 20.81  | 11.52 | 7.09E-02 | 17.30   | 30.02 | 5.65E-01 |
| cg22825202 | 13.19  | 6.68  | 4.84E-02 | 11.00  | 9.93  | 2.68E-01 | 28.19   | 14.00  | 4.40E-02 | 18.56  | 18.02 | 3.03E-01 | -4.29   | 15.71 | 7.85E-01 |
| cg13491907 | -19.20 | 9.73  | 4.84E-02 | -39.34 | 11.77 | 8.34E-04 | 3.61    | 13.44  | 7.88E-01 | -9.98  | 9.12  | 2.74E-01 | -33.47  | 15.48 | 3.07E-02 |
| cg03072616 | -74.05 | 37.52 | 4.84E-02 | -55.87 | 56.06 | 3.19E-01 | 107.63  | 230.88 | 6.41E-01 | -87.13 | 89.95 | 3.33E-01 | -104.39 | 63.27 | 9.89E-02 |
| cg15985470 | -8.84  | 4.48  | 4.84E-02 | -10.16 | 6.35  | 1.10E-01 | -2.31   | 10.47  | 8.25E-01 | -28.09 | 14.73 | 5.65E-02 | -3.37   | 9.42  | 7.20E-01 |
| cg26607620 | -3.29  | 1.67  | 4.84E-02 | -5.40  | 2.28  | 1.79E-02 | -0.20   | 3.58   | 9.55E-01 | -3.75  | 7.61  | 6.22E-01 | -0.90   | 3.73  | 8.09E-01 |
| cg14171527 | 5.69   | 2.88  | 4.84E-02 | 4.32   | 3.70  | 2.43E-01 | 10.23   | 6.51   | 1.16E-01 | 1.99   | 8.89  | 8.23E-01 | 9.13    | 9.41  | 3.32E-01 |
| cg11008243 | 30.70  | 15.56 | 4.84E-02 | 13.86  | 20.45 | 4.98E-01 | -36.93  | 75.15  | 6.23E-01 | 35.28  | 49.95 | 4.80E-01 | 63.52   | 25.73 | 1.35E-02 |
| cg03370106 | 9.46   | 4.79  | 4.84E-02 | 13.89  | 7.00  | 4.72E-02 | 9.93    | 12.64  | 4.32E-01 | 7.74   | 13.03 | 5.52E-01 | 1.89    | 9.52  | 8.43E-01 |
| cg21404910 | 34.17  | 17.31 | 4.84E-02 | 20.75  | 23.39 | 3.75E-01 | 62.18   | 58.28  | 2.86E-01 | 5.29   | 70.59 | 9.40E-01 | 55.97   | 31.43 | 7.49E-02 |
| cg05780577 | 13.53  | 6.85  | 4.84E-02 | 11.24  | 21.83 | 6.07E-01 | 10.92   | 76.53  | 8.86E-01 | 13.01  | 7.44  | 8.04E-02 | 28.53   | 32.17 | 3.75E-01 |
| cg07296597 | -9.55  | 4.84  | 4.84E-02 | -12.07 | 8.05  | 1.34E-01 | -3.27   | 10.80  | 7.62E-01 | -1.89  | 9.77  | 8.47E-01 | -21.17  | 11.04 | 5.51E-02 |
| cg26416159 | 26.70  | 13.53 | 4.85E-02 | 20.05  | 18.03 | 2.66E-01 | 73.21   | 30.44  | 1.62E-02 | 21.99  | 35.10 | 5.31E-01 | 0.72    | 30.65 | 9.81E-01 |
| cg18819978 | -36.85 | 18.67 | 4.85E-02 | -38.83 | 23.16 | 9.36E-02 | -126.45 | 89.09  | 1.56E-01 | 17.49  | 87.56 | 8.42E-01 | -26.27  | 36.59 | 4.73E-01 |
| cg04324276 | -13.20 | 6.69  | 4.85E-02 | -12.43 | 10.58 | 2.40E-01 | -5.56   | 16.85  | 7.42E-01 | -15.09 | 13.31 | 2.57E-01 | -18.60  | 15.31 | 2.24E-01 |
| cg23124641 | 8.92   | 4.52  | 4.85E-02 | 11.23  | 6.14  | 6.75E-02 | 0.29    | 11.17  | 9.79E-01 | 10.09  | 12.32 | 4.13E-01 | 8.93    | 11.28 | 4.28E-01 |
| cg15212821 | -15.11 | 7.66  | 4.85E-02 | -26.60 | 14.77 | 7.16E-02 | 0.35    | 39.97  | 9.93E-01 | -16.73 | 9.67  | 8.37E-02 | 22.72   | 25.25 | 3.68E-01 |
| cg07629149 | -18.10 | 9.17  | 4.85E-02 | -16.17 | 15.87 | 3.08E-01 | 1.16    | 26.97  | 9.66E-01 | -31.79 | 15.14 | 3.58E-02 | -6.35   | 21.44 | 7.67E-01 |
| cg23361809 | -8.76  | 4.44  | 4.85E-02 | -11.12 | 8.59  | 1.95E-01 | -4.32   | 12.05  | 7.20E-01 | -10.39 | 6.39  | 1.04E-01 | -1.67   | 13.09 | 8.99E-01 |
| cg21682826 | 67.61  | 34.27 | 4.85E-02 | 110.26 | 50.10 | 2.78E-02 | -17.51  | 249.07 | 9.44E-01 | 22.27  | 18.36 | 2.25E-01 | 133.60  | 61.23 | 2.91E-02 |

|            |        |       |          |        |       |          |         |        |          |        |       |          |        |       |          |
|------------|--------|-------|----------|--------|-------|----------|---------|--------|----------|--------|-------|----------|--------|-------|----------|
| cg08582701 | 9.74   | 4.94  | 4.85E-02 | 8.90   | 7.95  | 2.63E-01 | 7.06    | 13.66  | 6.05E-01 | 17.24  | 10.89 | 1.13E-01 | 6.62   | 9.37  | 4.80E-01 |
| cg08038033 | 6.86   | 3.47  | 4.85E-02 | 8.66   | 4.73  | 6.72E-02 | 4.40    | 9.31   | 6.36E-01 | -6.77  | 12.45 | 5.87E-01 | 8.61   | 7.04  | 2.21E-01 |
| cg05544500 | 13.64  | 6.91  | 4.85E-02 | 12.41  | 11.57 | 2.84E-01 | 16.38   | 18.97  | 3.88E-01 | 25.52  | 14.61 | 8.06E-02 | 4.62   | 12.92 | 7.21E-01 |
| cg04095732 | 25.64  | 12.99 | 4.85E-02 | 47.18  | 20.64 | 2.23E-02 | -28.65  | 44.89  | 5.23E-01 | 47.81  | 40.35 | 2.36E-01 | 14.58  | 17.12 | 3.94E-01 |
| cg14611112 | 8.76   | 4.44  | 4.85E-02 | 8.91   | 5.86  | 1.28E-01 | 9.33    | 10.56  | 3.77E-01 | 25.10  | 14.71 | 8.79E-02 | -1.85  | 11.17 | 8.68E-01 |
| cg23400222 | -9.03  | 4.58  | 4.85E-02 | -9.01  | 9.16  | 3.25E-01 | -5.99   | 12.22  | 6.24E-01 | -6.87  | 6.75  | 3.09E-01 | -18.62 | 11.85 | 1.16E-01 |
| cg10864603 | -11.61 | 5.88  | 4.85E-02 | -29.16 | 11.80 | 1.35E-02 | -2.47   | 13.04  | 8.50E-01 | -6.30  | 6.40  | 3.25E-01 | -20.53 | 20.00 | 3.05E-01 |
| cg00743929 | -19.56 | 9.92  | 4.85E-02 | -12.01 | 14.22 | 3.99E-01 | -24.60  | 22.39  | 2.72E-01 | -68.29 | 41.94 | 1.03E-01 | -19.42 | 19.38 | 3.16E-01 |
| cg22870609 | 17.93  | 9.09  | 4.85E-02 | 38.70  | 15.36 | 1.17E-02 | -28.53  | 33.15  | 3.89E-01 | 15.35  | 8.97  | 8.71E-02 | 13.08  | 20.05 | 5.14E-01 |
| cg11055358 | -36.77 | 18.63 | 4.85E-02 | -26.75 | 74.08 | 7.18E-01 | 128.82  | 247.53 | 6.03E-01 | -39.94 | 20.38 | 5.01E-02 | -25.45 | 60.35 | 6.73E-01 |
| cg23058719 | -11.14 | 5.64  | 4.85E-02 | -24.00 | 9.80  | 1.44E-02 | 1.28    | 10.85  | 9.06E-01 | -8.68  | 13.99 | 5.35E-01 | -9.36  | 10.93 | 3.92E-01 |
| cg05906777 | 12.48  | 6.32  | 4.85E-02 | 10.81  | 9.27  | 2.44E-01 | 29.64   | 17.10  | 8.30E-02 | 15.11  | 13.73 | 2.71E-01 | 1.01   | 14.67 | 9.45E-01 |
| cg16097079 | 22.50  | 11.41 | 4.85E-02 | 20.04  | 15.78 | 2.04E-01 | -7.26   | 34.00  | 8.31E-01 | 18.31  | 43.44 | 6.73E-01 | 39.17  | 20.98 | 6.19E-02 |
| cg05400498 | 10.20  | 5.17  | 4.85E-02 | 12.56  | 8.29  | 1.30E-01 | 11.37   | 12.30  | 3.55E-01 | 9.79   | 9.62  | 3.09E-01 | 3.28   | 13.58 | 8.09E-01 |
| cg07429087 | -6.59  | 3.34  | 4.85E-02 | -11.34 | 6.33  | 7.34E-02 | -8.58   | 9.19   | 3.50E-01 | -4.34  | 5.05  | 3.90E-01 | -2.63  | 8.62  | 7.60E-01 |
| cg26593474 | 23.10  | 11.71 | 4.85E-02 | 20.96  | 17.87 | 2.41E-01 | 35.34   | 46.05  | 4.43E-01 | 2.28   | 73.69 | 9.75E-01 | 24.47  | 16.90 | 1.48E-01 |
| cg27256934 | 29.89  | 15.15 | 4.85E-02 | 66.35  | 42.70 | 1.20E-01 | -129.82 | 158.10 | 4.12E-01 | 23.25  | 16.92 | 1.69E-01 | 64.27  | 60.03 | 2.84E-01 |
| cg15048099 | 7.81   | 3.96  | 4.85E-02 | 7.62   | 5.90  | 1.97E-01 | 12.12   | 7.71   | 1.16E-01 | 0.46   | 11.34 | 9.68E-01 | 6.86   | 9.75  | 4.81E-01 |
| cg08935602 | -40.75 | 20.65 | 4.85E-02 | -38.37 | 27.14 | 1.57E-01 | -144.61 | 113.41 | 2.02E-01 | -4.71  | 45.26 | 9.17E-01 | -71.06 | 48.78 | 1.45E-01 |
| cg11125787 | 37.49  | 19.01 | 4.85E-02 | 15.44  | 28.10 | 5.83E-01 | 36.24   | 77.95  | 6.42E-01 | 72.98  | 42.76 | 8.78E-02 | 48.54  | 35.59 | 1.73E-01 |
| cg00192966 | -8.54  | 4.33  | 4.85E-02 | -8.27  | 8.59  | 3.36E-01 | -7.86   | 17.16  | 6.47E-01 | -8.34  | 5.62  | 1.38E-01 | -11.08 | 14.45 | 4.43E-01 |
| cg07408456 | 8.38   | 4.25  | 4.85E-02 | 5.91   | 5.50  | 2.83E-01 | 18.11   | 11.03  | 1.01E-01 | 18.78  | 11.74 | 1.10E-01 | -2.25  | 11.99 | 8.51E-01 |
| cg18395466 | 16.01  | 8.12  | 4.86E-02 | 8.92   | 23.33 | 7.02E-01 | 3.89    | 43.89  | 9.29E-01 | 19.19  | 9.59  | 4.54E-02 | 8.17   | 22.66 | 7.18E-01 |
| cg01531333 | 22.43  | 11.37 | 4.86E-02 | 13.91  | 15.81 | 3.79E-01 | 35.36   | 25.03  | 1.58E-01 | 78.60  | 39.95 | 4.91E-02 | 8.01   | 25.74 | 7.56E-01 |
| cg07303496 | -44.72 | 22.67 | 4.86E-02 | -53.23 | 28.84 | 6.49E-02 | -128.32 | 90.12  | 1.54E-01 | 15.70  | 62.96 | 8.03E-01 | -30.34 | 52.18 | 5.61E-01 |
| cg09354294 | -11.97 | 6.07  | 4.86E-02 | -20.94 | 7.65  | 6.21E-03 | 6.56    | 12.76  | 6.07E-01 | -12.78 | 17.22 | 4.58E-01 | -9.83  | 11.71 | 4.01E-01 |
| cg17470697 | 21.86  | 11.08 | 4.86E-02 | 21.97  | 13.41 | 1.01E-01 | 44.46   | 44.32  | 3.16E-01 | -4.91  | 40.60 | 9.04E-01 | 24.66  | 26.12 | 3.45E-01 |
| cg14169308 | 19.74  | 10.01 | 4.86E-02 | -14.85 | 38.54 | 7.00E-01 | 29.15   | 169.34 | 8.63E-01 | 21.48  | 10.67 | 4.42E-02 | 35.31  | 44.95 | 4.32E-01 |
| cg06177306 | 12.98  | 6.58  | 4.86E-02 | 25.92  | 13.15 | 4.87E-02 | 5.75    | 23.08  | 8.03E-01 | 3.61   | 9.10  | 6.92E-01 | 28.32  | 17.22 | 1.00E-01 |
| cg14010696 | 16.65  | 8.44  | 4.86E-02 | 4.41   | 15.77 | 7.80E-01 | 23.56   | 15.75  | 1.35E-01 | 23.26  | 15.23 | 1.27E-01 | 12.38  | 24.41 | 6.12E-01 |
| cg07788204 | 13.23  | 6.71  | 4.86E-02 | 15.12  | 9.89  | 1.26E-01 | 21.32   | 16.00  | 1.83E-01 | 18.85  | 22.32 | 3.98E-01 | 3.00   | 12.81 | 8.15E-01 |
| cg10820587 | -10.19 | 5.17  | 4.86E-02 | -18.07 | 12.64 | 1.53E-01 | 1.58    | 20.93  | 9.40E-01 | -7.60  | 6.36  | 2.32E-01 | -20.02 | 15.39 | 1.93E-01 |
| cg17186428 | -11.05 | 5.60  | 4.86E-02 | -14.00 | 10.66 | 1.89E-01 | -2.01   | 11.91  | 8.66E-01 | -18.30 | 9.35  | 5.03E-02 | -1.12  | 14.85 | 9.40E-01 |
| cg17560338 | -42.21 | 21.40 | 4.86E-02 | -40.99 | 26.39 | 1.20E-01 | -1.58   | 79.23  | 9.84E-01 | 19.41  | 81.62 | 8.12E-01 | -82.08 | 47.76 | 8.57E-02 |
| cg07433773 | 18.85  | 9.56  | 4.86E-02 | 30.03  | 13.60 | 2.72E-02 | -0.33   | 15.50  | 9.83E-01 | 7.38   | 15.38 | 6.31E-01 | 44.20  | 19.95 | 2.67E-02 |

|            |        |       |          |        |       |          |        |        |          |        |       |          |        |       |          |
|------------|--------|-------|----------|--------|-------|----------|--------|--------|----------|--------|-------|----------|--------|-------|----------|
| cg05636467 | 3.40   | 1.73  | 4.86E-02 | 3.65   | 2.24  | 1.03E-01 | 6.81   | 2.86   | 1.72E-02 | -3.51  | 4.96  | 4.80E-01 | 1.56   | 3.85  | 6.86E-01 |
| cg04695882 | 6.92   | 3.51  | 4.86E-02 | 7.03   | 4.92  | 1.53E-01 | 10.61  | 7.51   | 1.58E-01 | 16.87  | 11.16 | 1.31E-01 | -3.60  | 8.38  | 6.67E-01 |
| cg02852257 | 36.32  | 18.42 | 4.86E-02 | 56.37  | 55.20 | 3.07E-01 | 51.55  | 177.94 | 7.72E-01 | 43.18  | 20.52 | 3.54E-02 | -72.53 | 68.28 | 2.88E-01 |
| cg13017983 | -15.17 | 7.69  | 4.86E-02 | -5.54  | 6.75  | 4.12E-01 | -40.60 | 11.36  | 3.51E-04 | -6.01  | 14.59 | 6.80E-01 | -11.66 | 8.64  | 1.77E-01 |
| cg13225166 | 15.01  | 7.61  | 4.86E-02 | 17.50  | 16.05 | 2.75E-01 | 100.39 | 61.50  | 1.03E-01 | 7.05   | 6.42  | 2.72E-01 | 26.47  | 13.43 | 4.87E-02 |
| cg11671115 | -9.39  | 4.76  | 4.86E-02 | -9.39  | 10.81 | 3.85E-01 | 19.32  | 17.62  | 2.73E-01 | -11.06 | 5.11  | 3.05E-02 | -19.85 | 15.53 | 2.01E-01 |
| cg09372750 | 19.66  | 9.97  | 4.86E-02 | 13.20  | 20.96 | 5.29E-01 | 33.13  | 11.53  | 4.06E-03 | 1.32   | 11.78 | 9.10E-01 | 44.64  | 27.69 | 1.07E-01 |
| cg03279443 | 30.08  | 15.25 | 4.86E-02 | 30.97  | 17.27 | 7.29E-02 | -73.23 | 133.24 | 5.83E-01 | -17.05 | 69.32 | 8.06E-01 | 48.69  | 38.34 | 2.04E-01 |
| cg05949913 | -8.61  | 4.37  | 4.86E-02 | -21.18 | 9.42  | 2.46E-02 | -0.30  | 15.61  | 9.85E-01 | -5.59  | 5.66  | 3.23E-01 | -6.38  | 13.10 | 6.26E-01 |
| cg14585611 | 15.54  | 7.88  | 4.86E-02 | 20.13  | 8.55  | 1.85E-02 | 5.61   | 47.32  | 9.06E-01 | -2.70  | 65.13 | 9.67E-01 | -15.61 | 24.00 | 5.15E-01 |
| cg16408081 | -6.69  | 3.39  | 4.86E-02 | -6.54  | 3.98  | 1.00E-01 | -6.35  | 8.60   | 4.61E-01 | -6.63  | 14.59 | 6.49E-01 | -9.40  | 13.60 | 4.89E-01 |
| cg07266046 | -8.15  | 4.13  | 4.86E-02 | -3.96  | 9.65  | 6.82E-01 | -6.46  | 19.12  | 7.36E-01 | -10.55 | 5.09  | 3.82E-02 | -1.51  | 12.43 | 9.03E-01 |
| cg11554295 | 6.77   | 3.43  | 4.86E-02 | 4.45   | 4.18  | 2.87E-01 | 16.58  | 9.25   | 7.31E-02 | 9.46   | 12.61 | 4.53E-01 | 6.87   | 10.15 | 4.99E-01 |
| cg02551745 | 5.47   | 2.77  | 4.86E-02 | 5.28   | 3.50  | 1.32E-01 | 11.96  | 7.29   | 1.01E-01 | 9.34   | 9.95  | 3.48E-01 | -2.01  | 7.17  | 7.79E-01 |
| cg11624233 | 9.99   | 5.06  | 4.86E-02 | 11.26  | 7.84  | 1.51E-01 | 10.50  | 10.99  | 3.40E-01 | 11.54  | 12.81 | 3.68E-01 | 5.87   | 10.94 | 5.92E-01 |
| cg03209812 | -20.71 | 10.50 | 4.86E-02 | 10.55  | 28.58 | 7.12E-01 | 56.26  | 124.85 | 6.52E-01 | -23.64 | 12.02 | 4.92E-02 | -47.68 | 34.27 | 1.64E-01 |
| cg09539824 | -7.09  | 3.59  | 4.86E-02 | -10.24 | 6.24  | 1.01E-01 | 2.47   | 8.33   | 7.66E-01 | -5.56  | 6.33  | 3.80E-01 | -14.71 | 8.97  | 1.01E-01 |
| cg23712018 | 3.85   | 1.95  | 4.86E-02 | 3.10   | 2.86  | 2.78E-01 | 6.33   | 4.17   | 1.29E-01 | 7.15   | 5.30  | 1.77E-01 | 0.27   | 4.61  | 9.53E-01 |
| cg00320301 | -7.64  | 3.87  | 4.86E-02 | -12.49 | 6.51  | 5.49E-02 | 4.91   | 8.38   | 5.58E-01 | -6.46  | 5.46  | 2.37E-01 | -15.61 | 8.67  | 7.19E-02 |
| cg04195941 | -16.87 | 8.56  | 4.86E-02 | -28.48 | 15.78 | 7.11E-02 | -6.64  | 17.48  | 7.04E-01 | -18.47 | 16.81 | 2.72E-01 | -10.24 | 18.81 | 5.86E-01 |
| cg17617714 | 16.03  | 8.13  | 4.86E-02 | 24.93  | 15.17 | 1.00E-01 | 24.72  | 15.78  | 1.17E-01 | 6.45   | 14.46 | 6.56E-01 | 2.10   | 22.42 | 9.26E-01 |
| cg27323557 | 15.77  | 8.00  | 4.86E-02 | 25.89  | 17.07 | 1.29E-01 | 5.94   | 28.68  | 8.36E-01 | 17.28  | 10.32 | 9.40E-02 | -7.37  | 25.00 | 7.68E-01 |
| cg19600372 | 12.70  | 6.44  | 4.86E-02 | 5.09   | 15.33 | 7.40E-01 | 25.08  | 18.08  | 1.65E-01 | 13.18  | 8.16  | 1.06E-01 | 5.56   | 23.66 | 8.14E-01 |
| cg01087710 | -22.03 | 11.17 | 4.86E-02 | -26.68 | 12.40 | 3.15E-02 | -19.73 | 68.34  | 7.73E-01 | -14.49 | 40.81 | 7.22E-01 | 14.06  | 37.81 | 7.10E-01 |
| cg03204140 | -17.78 | 9.02  | 4.86E-02 | -21.22 | 17.53 | 2.26E-01 | -2.33  | 18.42  | 8.99E-01 | -27.07 | 17.34 | 1.18E-01 | -19.03 | 19.01 | 3.17E-01 |
| cg15648896 | 11.22  | 5.69  | 4.86E-02 | 13.83  | 7.91  | 8.02E-02 | 18.58  | 15.08  | 2.18E-01 | 3.23   | 16.07 | 8.41E-01 | 4.69   | 12.32 | 7.04E-01 |
| cg03905500 | -13.34 | 6.77  | 4.86E-02 | -22.08 | 14.14 | 1.18E-01 | -35.54 | 27.06  | 1.89E-01 | -5.43  | 8.95  | 5.44E-01 | -21.66 | 18.31 | 2.37E-01 |
| cg21603144 | 7.13   | 3.62  | 4.86E-02 | 9.81   | 5.02  | 5.05E-02 | 6.98   | 7.93   | 3.79E-01 | -1.23  | 11.24 | 9.13E-01 | 4.20   | 8.82  | 6.34E-01 |
| cg05706437 | -6.70  | 3.40  | 4.86E-02 | -13.48 | 7.61  | 7.65E-02 | -1.60  | 13.72  | 9.07E-01 | -5.70  | 4.27  | 1.82E-01 | -2.91  | 10.47 | 7.81E-01 |
| cg25777912 | -18.09 | 9.17  | 4.86E-02 | -24.88 | 15.95 | 1.19E-01 | -23.56 | 26.85  | 3.80E-01 | -17.04 | 17.45 | 3.29E-01 | -8.69  | 17.45 | 6.19E-01 |
| cg08705382 | -10.47 | 5.31  | 4.86E-02 | -1.91  | 12.37 | 8.78E-01 | 5.35   | 18.83  | 7.76E-01 | -12.70 | 6.63  | 5.53E-02 | -25.20 | 17.23 | 1.44E-01 |
| cg06174599 | 18.87  | 9.57  | 4.87E-02 | 23.69  | 13.21 | 7.29E-02 | -1.14  | 24.96  | 9.64E-01 | 38.06  | 32.17 | 2.37E-01 | 13.51  | 19.58 | 4.90E-01 |
| cg05603908 | 15.38  | 7.80  | 4.87E-02 | 16.88  | 17.00 | 3.21E-01 | 2.41   | 15.59  | 8.77E-01 | 14.75  | 12.02 | 2.20E-01 | 42.55  | 22.73 | 6.12E-02 |
| cg14415034 | -27.77 | 14.08 | 4.87E-02 | -66.08 | 45.81 | 1.49E-01 | -74.55 | 183.16 | 6.84E-01 | -29.68 | 15.45 | 5.47E-02 | 52.36  | 53.79 | 3.30E-01 |
| cg26521404 | 12.67  | 6.43  | 4.87E-02 | 43.20  | 26.14 | 9.84E-02 | 23.03  | 32.41  | 4.77E-01 | 9.27   | 7.89  | 2.40E-01 | 12.70  | 13.22 | 3.37E-01 |

|            |        |       |          |         |       |          |         |        |          |         |       |          |        |       |          |
|------------|--------|-------|----------|---------|-------|----------|---------|--------|----------|---------|-------|----------|--------|-------|----------|
| cg02393721 | -5.94  | 3.01  | 4.87E-02 | -9.66   | 5.68  | 8.91E-02 | -5.84   | 6.82   | 3.92E-01 | -0.36   | 4.85  | 9.41E-01 | -14.14 | 8.12  | 8.18E-02 |
| cg01903185 | -49.23 | 24.97 | 4.87E-02 | -36.03  | 36.04 | 3.17E-01 | -3.49   | 108.05 | 9.74E-01 | -77.86  | 64.37 | 2.26E-01 | -63.37 | 44.41 | 1.54E-01 |
| cg03585323 | -16.54 | 8.39  | 4.87E-02 | -27.53  | 21.10 | 1.92E-01 | -40.75  | 33.99  | 2.31E-01 | -14.89  | 10.02 | 1.37E-01 | 9.40   | 29.82 | 7.53E-01 |
| cg14691921 | -10.66 | 5.41  | 4.87E-02 | -16.35  | 14.84 | 2.71E-01 | -16.98  | 21.61  | 4.32E-01 | -6.92   | 6.38  | 2.77E-01 | -28.73 | 18.54 | 1.21E-01 |
| cg27157482 | 12.61  | 6.40  | 4.87E-02 | 22.41   | 11.17 | 4.49E-02 | 11.57   | 12.59  | 3.58E-01 | 12.36   | 14.06 | 3.80E-01 | -1.36  | 14.07 | 9.23E-01 |
| cg01512589 | 14.66  | 7.44  | 4.87E-02 | 12.08   | 9.82  | 2.19E-01 | 28.09   | 19.10  | 1.41E-01 | 42.91   | 44.72 | 3.37E-01 | 9.26   | 14.94 | 5.35E-01 |
| cg10835872 | 19.49  | 9.88  | 4.87E-02 | 17.18   | 18.53 | 3.54E-01 | 17.69   | 20.92  | 3.98E-01 | 17.82   | 17.03 | 2.95E-01 | 29.86  | 25.04 | 2.33E-01 |
| cg24432977 | -11.78 | 5.98  | 4.87E-02 | -20.54  | 13.78 | 1.36E-01 | -12.71  | 29.20  | 6.63E-01 | -11.21  | 7.15  | 1.17E-01 | 6.18   | 22.30 | 7.82E-01 |
| cg03197032 | -5.32  | 2.70  | 4.87E-02 | -4.85   | 4.29  | 2.58E-01 | -1.25   | 5.74   | 8.27E-01 | -10.54  | 5.86  | 7.23E-02 | -5.23  | 6.55  | 4.25E-01 |
| cg20014596 | -11.56 | 5.86  | 4.87E-02 | -15.23  | 8.95  | 8.89E-02 | -3.43   | 13.58  | 8.01E-01 | -12.28  | 21.41 | 5.66E-01 | -11.20 | 10.54 | 2.88E-01 |
| cg23273418 | -13.51 | 6.85  | 4.87E-02 | -20.41  | 11.28 | 7.04E-02 | -19.41  | 15.12  | 1.99E-01 | -4.94   | 16.53 | 7.65E-01 | -4.50  | 13.62 | 7.41E-01 |
| cg24009656 | -9.78  | 4.96  | 4.87E-02 | -26.92  | 11.14 | 1.56E-02 | -9.61   | 16.16  | 5.52E-01 | -6.69   | 5.63  | 2.35E-01 | 0.68   | 13.77 | 9.61E-01 |
| cg03291024 | -9.09  | 4.61  | 4.87E-02 | -5.53   | 6.47  | 3.92E-01 | -6.32   | 10.02  | 5.28E-01 | -20.44  | 16.50 | 2.15E-01 | -16.52 | 10.25 | 1.07E-01 |
| cg14652230 | 26.83  | 13.61 | 4.87E-02 | 27.28   | 16.61 | 1.00E-01 | 46.10   | 59.76  | 4.40E-01 | 40.88   | 45.30 | 3.67E-01 | 13.02  | 31.55 | 6.80E-01 |
| cg01933836 | 16.99  | 8.62  | 4.87E-02 | 19.27   | 19.58 | 3.25E-01 | 35.10   | 30.23  | 2.46E-01 | 16.78   | 11.80 | 1.55E-01 | 7.56   | 19.73 | 7.02E-01 |
| cg03401902 | -18.24 | 9.25  | 4.87E-02 | -19.25  | 18.55 | 2.99E-01 | -61.42  | 56.21  | 2.75E-01 | -17.57  | 11.71 | 1.33E-01 | -8.18  | 29.38 | 7.81E-01 |
| cg16049690 | 12.76  | 6.48  | 4.87E-02 | 29.32   | 6.55  | 7.51E-06 | 1.03    | 8.52   | 9.04E-01 | 10.56   | 8.38  | 2.08E-01 | 7.67   | 7.10  | 2.80E-01 |
| cg02279212 | -15.04 | 7.63  | 4.87E-02 | 0.87    | 17.19 | 9.60E-01 | -8.80   | 41.65  | 8.33E-01 | -21.21  | 9.18  | 2.09E-02 | -3.39  | 27.28 | 9.01E-01 |
| cg07814541 | -10.69 | 5.43  | 4.87E-02 | -3.50   | 11.01 | 7.51E-01 | -8.68   | 12.63  | 4.92E-01 | -11.31  | 8.52  | 1.84E-01 | -21.88 | 13.28 | 9.94E-02 |
| cg13032151 | 19.58  | 9.93  | 4.87E-02 | 17.41   | 12.77 | 1.73E-01 | 63.23   | 62.30  | 3.10E-01 | 72.76   | 52.10 | 1.63E-01 | 14.39  | 17.20 | 4.03E-01 |
| cg23707719 | 16.32  | 8.28  | 4.87E-02 | 15.02   | 12.53 | 2.31E-01 | 31.42   | 16.35  | 5.46E-02 | -0.69   | 19.27 | 9.71E-01 | 14.97  | 23.66 | 5.27E-01 |
| cg10762132 | -59.39 | 30.13 | 4.87E-02 | -105.15 | 37.65 | 5.22E-03 | -117.78 | 156.40 | 4.51E-01 | -13.61  | 15.33 | 3.75E-01 | -81.92 | 44.27 | 6.42E-02 |
| cg15473329 | -9.88  | 5.01  | 4.87E-02 | -15.41  | 8.51  | 7.02E-02 | -14.66  | 12.85  | 2.54E-01 | -8.60   | 11.20 | 4.43E-01 | -1.95  | 9.13  | 8.31E-01 |
| cg05363257 | -69.56 | 35.29 | 4.87E-02 | -69.38  | 47.03 | 1.40E-01 | 150.60  | 211.37 | 4.76E-01 | -123.97 | 78.04 | 1.12E-01 | -45.68 | 78.01 | 5.58E-01 |
| cg24307102 | -11.44 | 5.81  | 4.87E-02 | -17.31  | 15.61 | 2.67E-01 | -12.32  | 16.89  | 4.66E-01 | -9.95   | 7.10  | 1.61E-01 | -12.54 | 21.09 | 5.52E-01 |
| cg08751472 | 19.60  | 9.94  | 4.87E-02 | 24.49   | 19.12 | 2.00E-01 | -12.27  | 31.54  | 6.97E-01 | 22.78   | 15.04 | 1.30E-01 | 21.97  | 22.63 | 3.32E-01 |
| cg05316785 | -7.58  | 3.84  | 4.87E-02 | -13.41  | 6.84  | 4.99E-02 | 7.19    | 11.68  | 5.39E-01 | -7.67   | 5.89  | 1.93E-01 | -5.68  | 9.94  | 5.67E-01 |
| cg22509384 | -38.74 | 19.65 | 4.87E-02 | -56.13  | 31.59 | 7.56E-02 | 119.33  | 93.67  | 2.03E-01 | -35.76  | 30.72 | 2.44E-01 | -46.63 | 39.03 | 2.32E-01 |
| cg01477379 | 14.29  | 7.25  | 4.87E-02 | 30.46   | 13.29 | 2.20E-02 | -19.56  | 28.75  | 4.96E-01 | 9.54    | 6.89  | 1.66E-01 | 25.32  | 23.24 | 2.76E-01 |
| cg25006823 | -7.65  | 3.88  | 4.87E-02 | -8.51   | 5.24  | 1.04E-01 | -4.14   | 10.68  | 6.98E-01 | -1.63   | 9.44  | 8.63E-01 | -14.36 | 10.02 | 1.52E-01 |
| cg03099482 | 22.70  | 11.52 | 4.87E-02 | 22.99   | 14.69 | 1.18E-01 | 6.43    | 38.36  | 8.67E-01 | 23.81   | 35.71 | 5.05E-01 | 28.87  | 26.37 | 2.74E-01 |
| cg17391830 | -28.64 | 14.53 | 4.87E-02 | -28.52  | 19.08 | 1.35E-01 | -7.40   | 66.87  | 9.12E-01 | -39.91  | 69.30 | 5.65E-01 | -30.41 | 25.36 | 2.30E-01 |
| cg13682223 | 29.81  | 15.12 | 4.87E-02 | -34.45  | 41.52 | 4.07E-01 | 23.24   | 156.09 | 8.82E-01 | 42.20   | 15.52 | 6.53E-03 | 16.11  | 49.75 | 7.46E-01 |
| cg08670465 | 31.00  | 15.73 | 4.87E-02 | 35.19   | 19.56 | 7.19E-02 | 3.61    | 83.58  | 9.66E-01 | 116.79  | 68.76 | 8.94E-02 | 7.50   | 30.55 | 8.06E-01 |
| cg25201998 | -10.61 | 5.38  | 4.87E-02 | -13.51  | 11.53 | 2.41E-01 | -42.95  | 23.08  | 6.28E-02 | -5.99   | 7.03  | 3.94E-01 | -12.88 | 14.35 | 3.69E-01 |

|            |        |       |          |        |       |          |         |        |          |        |       |          |        |       |          |
|------------|--------|-------|----------|--------|-------|----------|---------|--------|----------|--------|-------|----------|--------|-------|----------|
| cg22845912 | -10.45 | 5.30  | 4.87E-02 | -11.79 | 8.38  | 1.59E-01 | -16.42  | 11.38  | 1.49E-01 | -13.74 | 14.45 | 3.42E-01 | -1.25  | 10.65 | 9.06E-01 |
| cg09113070 | 7.92   | 4.02  | 4.87E-02 | 10.75  | 5.45  | 4.87E-02 | 6.23    | 9.16   | 4.96E-01 | 6.33   | 13.90 | 6.49E-01 | 1.95   | 9.45  | 8.37E-01 |
| cg12260643 | 19.27  | 9.78  | 4.88E-02 | 9.99   | 12.67 | 4.30E-01 | 29.88   | 41.86  | 4.75E-01 | 40.09  | 38.20 | 2.94E-01 | 31.89  | 18.34 | 8.21E-02 |
| cg08160641 | -38.93 | 19.76 | 4.88E-02 | -7.11  | 17.65 | 6.87E-01 | -87.65  | 42.54  | 3.94E-02 | -97.45 | 46.30 | 3.53E-02 | -28.60 | 23.00 | 2.14E-01 |
| cg20391432 | -12.82 | 6.51  | 4.88E-02 | -26.35 | 17.82 | 1.39E-01 | 21.00   | 40.32  | 6.02E-01 | -11.74 | 7.58  | 1.22E-01 | -11.62 | 20.14 | 5.64E-01 |
| cg18751674 | 19.80  | 10.05 | 4.88E-02 | 42.42  | 17.38 | 1.47E-02 | 6.58    | 20.51  | 7.48E-01 | 3.35   | 18.26 | 8.54E-01 | 24.62  | 28.66 | 3.90E-01 |
| cg23181831 | -7.50  | 3.81  | 4.88E-02 | -6.27  | 5.34  | 2.40E-01 | -4.34   | 9.70   | 6.54E-01 | -2.15  | 12.56 | 8.64E-01 | -14.02 | 7.68  | 6.78E-02 |
| cg06369108 | 15.39  | 7.81  | 4.88E-02 | 28.30  | 19.67 | 1.50E-01 | 21.92   | 27.86  | 4.31E-01 | 12.55  | 9.33  | 1.79E-01 | 6.57   | 30.89 | 8.32E-01 |
| cg13394857 | -15.01 | 7.61  | 4.88E-02 | -26.42 | 20.40 | 1.95E-01 | -15.42  | 32.94  | 6.40E-01 | -8.51  | 7.18  | 2.36E-01 | -52.27 | 25.31 | 3.89E-02 |
| cg07906527 | 13.57  | 6.89  | 4.88E-02 | 12.53  | 21.66 | 5.63E-01 | -11.11  | 35.41  | 7.54E-01 | 15.21  | 7.61  | 4.55E-02 | 6.21   | 33.55 | 8.53E-01 |
| cg24317069 | -25.09 | 12.73 | 4.88E-02 | -12.24 | 21.22 | 5.64E-01 | -6.02   | 58.07  | 9.17E-01 | -27.07 | 18.70 | 1.48E-01 | -61.09 | 35.53 | 8.55E-02 |
| cg14193343 | 18.66  | 9.47  | 4.88E-02 | 16.27  | 19.96 | 4.15E-01 | 34.03   | 20.91  | 1.04E-01 | 16.68  | 14.05 | 2.35E-01 | 3.83   | 27.88 | 8.91E-01 |
| cg17591816 | 4.40   | 2.23  | 4.88E-02 | 5.65   | 3.26  | 8.35E-02 | 9.48    | 5.41   | 7.98E-02 | -0.24  | 4.32  | 9.55E-01 | 2.19   | 7.26  | 7.62E-01 |
| cg22143387 | 9.78   | 4.96  | 4.88E-02 | 6.20   | 6.60  | 3.47E-01 | 15.34   | 10.82  | 1.56E-01 | 17.47  | 16.06 | 2.77E-01 | 10.71  | 13.85 | 4.39E-01 |
| cg15531536 | -16.90 | 8.58  | 4.88E-02 | -30.30 | 16.54 | 6.69E-02 | 3.07    | 34.15  | 9.28E-01 | -11.80 | 12.20 | 3.33E-01 | -17.93 | 20.59 | 3.84E-01 |
| cg24133905 | 11.29  | 5.73  | 4.88E-02 | 18.45  | 8.45  | 2.89E-02 | 6.93    | 11.26  | 5.38E-01 | -9.63  | 19.54 | 6.22E-01 | 9.39   | 12.95 | 4.68E-01 |
| cg16831185 | 11.91  | 6.05  | 4.88E-02 | 13.04  | 7.44  | 7.97E-02 | 4.42    | 19.28  | 8.19E-01 | 27.19  | 22.65 | 2.30E-01 | 5.47   | 14.66 | 7.09E-01 |
| cg05384887 | -10.91 | 5.53  | 4.88E-02 | -17.00 | 15.48 | 2.72E-01 | -12.47  | 29.61  | 6.74E-01 | -9.99  | 6.29  | 1.12E-01 | -8.94  | 22.15 | 6.87E-01 |
| cg21860968 | -10.81 | 5.49  | 4.88E-02 | -13.94 | 9.90  | 1.59E-01 | -6.09   | 13.12  | 6.42E-01 | -5.49  | 9.78  | 5.74E-01 | -18.34 | 12.16 | 1.31E-01 |
| cg05546038 | 7.11   | 3.61  | 4.88E-02 | 5.07   | 4.76  | 2.87E-01 | 15.31   | 9.08   | 9.17E-02 | 5.03   | 9.65  | 6.02E-01 | 8.40   | 10.10 | 4.06E-01 |
| cg09307431 | -7.84  | 3.98  | 4.88E-02 | -0.19  | 9.32  | 9.84E-01 | 7.67    | 15.45  | 6.19E-01 | -10.47 | 5.01  | 3.65E-02 | -14.33 | 11.57 | 2.15E-01 |
| cg08836825 | -9.94  | 5.05  | 4.88E-02 | -11.16 | 10.41 | 2.84E-01 | -10.04  | 15.14  | 5.07E-01 | -12.66 | 6.84  | 6.40E-02 | 6.33   | 15.26 | 6.78E-01 |
| cg10627301 | 12.36  | 6.27  | 4.88E-02 | 8.34   | 16.67 | 6.17E-01 | 27.99   | 17.56  | 1.11E-01 | 9.84   | 7.75  | 2.04E-01 | 15.28  | 22.73 | 5.01E-01 |
| cg26265933 | 19.40  | 9.85  | 4.88E-02 | 16.48  | 12.57 | 1.90E-01 | 27.01   | 29.95  | 3.67E-01 | 0.78   | 34.97 | 9.82E-01 | 31.70  | 22.07 | 1.51E-01 |
| cg19791262 | 11.21  | 5.69  | 4.88E-02 | 13.43  | 8.80  | 1.27E-01 | 21.64   | 12.38  | 8.03E-02 | 12.84  | 13.86 | 3.54E-01 | -5.69  | 12.68 | 6.54E-01 |
| cg02762475 | -5.66  | 2.87  | 4.88E-02 | -7.68  | 3.95  | 5.18E-02 | -5.12   | 5.98   | 3.92E-01 | 0.82   | 18.11 | 9.64E-01 | -2.02  | 6.22  | 7.46E-01 |
| cg17072087 | 9.81   | 4.98  | 4.88E-02 | 12.24  | 6.78  | 7.10E-02 | 17.72   | 11.60  | 1.26E-01 | 2.73   | 14.31 | 8.49E-01 | -2.52  | 12.64 | 8.42E-01 |
| cg19646729 | 11.84  | 6.01  | 4.88E-02 | 1.59   | 13.41 | 9.05E-01 | 14.36   | 14.43  | 3.20E-01 | 19.77  | 8.62  | 2.18E-02 | -4.18  | 16.08 | 7.95E-01 |
| cg10649647 | 22.15  | 11.24 | 4.88E-02 | 31.40  | 14.25 | 2.76E-02 | 3.97    | 34.50  | 9.08E-01 | 3.88   | 42.70 | 9.28E-01 | 9.48   | 24.99 | 7.04E-01 |
| cg21885134 | 19.42  | 9.86  | 4.88E-02 | 23.86  | 16.36 | 1.45E-01 | 2.84    | 17.52  | 8.71E-01 | 10.01  | 15.24 | 5.11E-01 | 54.77  | 22.55 | 1.51E-02 |
| cg17926000 | 22.78  | 11.56 | 4.88E-02 | 23.31  | 12.29 | 5.79E-02 | -29.08  | 93.21  | 7.55E-01 | -11.00 | 59.60 | 8.54E-01 | 48.79  | 46.58 | 2.95E-01 |
| cg25563233 | 13.05  | 6.63  | 4.88E-02 | 47.51  | 28.96 | 1.01E-01 | 24.34   | 137.98 | 8.60E-01 | 12.55  | 7.31  | 8.61E-02 | 1.67   | 18.79 | 9.29E-01 |
| cg26294922 | -41.32 | 20.98 | 4.88E-02 | -61.82 | 45.34 | 1.73E-01 | -405.73 | 222.96 | 6.88E-02 | -29.38 | 18.23 | 1.07E-01 | -61.91 | 73.77 | 4.01E-01 |
| cg25274750 | 18.64  | 9.46  | 4.88E-02 | 6.73   | 20.20 | 7.39E-01 | 36.00   | 40.50  | 3.74E-01 | 24.53  | 11.99 | 4.07E-02 | -0.82  | 29.52 | 9.78E-01 |
| cg27543578 | 29.43  | 14.94 | 4.88E-02 | 46.27  | 19.73 | 1.90E-02 | 9.90    | 45.88  | 8.29E-01 | 7.06   | 10.52 | 5.02E-01 | 60.81  | 25.54 | 1.73E-02 |



|            |        |       |          |        |       |          |        |        |          |        |       |          |        |       |          |
|------------|--------|-------|----------|--------|-------|----------|--------|--------|----------|--------|-------|----------|--------|-------|----------|
| cg07536502 | -12.59 | 6.39  | 4.88E-02 | -10.51 | 8.70  | 2.27E-01 | -11.79 | 20.68  | 5.69E-01 | 24.31  | 30.47 | 4.25E-01 | -21.39 | 11.28 | 5.79E-02 |
| cg02281208 | 12.96  | 6.58  | 4.88E-02 | 14.31  | 13.91 | 3.04E-01 | 10.82  | 16.66  | 5.16E-01 | 19.08  | 10.60 | 7.19E-02 | 3.06   | 13.58 | 8.22E-01 |
| cg00521255 | 9.64   | 4.89  | 4.88E-02 | 12.08  | 7.35  | 1.01E-01 | 17.91  | 11.69  | 1.25E-01 | 9.97   | 10.66 | 3.50E-01 | -5.50  | 11.81 | 6.41E-01 |
| cg04536922 | 7.72   | 3.92  | 4.88E-02 | 9.45   | 5.48  | 8.48E-02 | 9.51   | 8.90   | 2.85E-01 | 3.99   | 12.03 | 7.40E-01 | 3.31   | 9.00  | 7.13E-01 |
| cg16901566 | -8.32  | 4.22  | 4.88E-02 | -8.49  | 7.42  | 2.53E-01 | -12.98 | 9.84   | 1.87E-01 | -3.12  | 7.25  | 6.67E-01 | -13.83 | 10.77 | 1.99E-01 |
| cg26875830 | 30.48  | 15.47 | 4.88E-02 | 60.60  | 19.36 | 1.74E-03 | -1.59  | 21.26  | 9.40E-01 | 14.42  | 12.76 | 2.58E-01 | 64.78  | 31.64 | 4.06E-02 |
| cg11743675 | -5.03  | 2.55  | 4.88E-02 | -9.38  | 4.91  | 5.63E-02 | -1.31  | 5.30   | 8.05E-01 | -7.17  | 4.26  | 9.23E-02 | 2.74   | 6.84  | 6.89E-01 |
| cg07810469 | 8.42   | 4.27  | 4.88E-02 | 8.28   | 7.24  | 2.53E-01 | 5.09   | 6.65   | 4.44E-01 | 24.60  | 17.01 | 1.48E-01 | 10.70  | 10.20 | 2.94E-01 |
| cg10503298 | -41.56 | 21.10 | 4.89E-02 | -25.91 | 26.58 | 3.30E-01 | -38.79 | 133.58 | 7.72E-01 | -99.00 | 59.51 | 9.62E-02 | -53.86 | 45.00 | 2.31E-01 |
| cg13971603 | 14.99  | 7.61  | 4.89E-02 | 1.98   | 12.66 | 8.76E-01 | 26.42  | 15.50  | 8.84E-02 | 9.87   | 15.44 | 5.22E-01 | 35.51  | 19.31 | 6.60E-02 |
| cg16648137 | -9.54  | 4.85  | 4.89E-02 | -18.73 | 10.57 | 7.65E-02 | -13.36 | 21.50  | 5.34E-01 | -6.83  | 6.18  | 2.69E-01 | -5.88  | 13.75 | 6.69E-01 |
| cg11367658 | 14.61  | 7.42  | 4.89E-02 | 22.75  | 12.96 | 7.93E-02 | 19.30  | 17.16  | 2.61E-01 | 0.42   | 12.32 | 9.73E-01 | 27.67  | 21.15 | 1.91E-01 |
| cg15472071 | 9.31   | 4.73  | 4.89E-02 | 10.76  | 6.55  | 1.00E-01 | -6.46  | 13.65  | 6.36E-01 | 13.08  | 11.34 | 2.49E-01 | 11.94  | 11.00 | 2.78E-01 |
| cg15815403 | -11.19 | 5.68  | 4.89E-02 | -7.89  | 9.36  | 3.99E-01 | -2.39  | 12.28  | 8.46E-01 | -12.89 | 11.39 | 2.58E-01 | -26.98 | 13.81 | 5.07E-02 |
| cg01880463 | 7.77   | 3.95  | 4.89E-02 | 9.46   | 5.29  | 7.37E-02 | 19.56  | 12.20  | 1.09E-01 | -2.34  | 8.88  | 7.92E-01 | 6.53   | 10.49 | 5.34E-01 |
| cg23383483 | 16.72  | 8.49  | 4.89E-02 | 26.07  | 23.48 | 2.67E-01 | -11.77 | 111.39 | 9.16E-01 | 13.82  | 9.54  | 1.48E-01 | 33.63  | 31.42 | 2.84E-01 |
| cg04001738 | 19.50  | 9.90  | 4.89E-02 | 10.52  | 18.90 | 5.78E-01 | 30.89  | 20.65  | 1.35E-01 | 17.82  | 16.83 | 2.90E-01 | 22.33  | 25.53 | 3.82E-01 |
| cg23424043 | -4.91  | 2.49  | 4.89E-02 | -5.00  | 3.74  | 1.81E-01 | -3.23  | 5.20   | 5.35E-01 | -10.81 | 6.21  | 8.18E-02 | -1.25  | 6.11  | 8.37E-01 |
| cg09695851 | 5.99   | 3.04  | 4.89E-02 | 5.00   | 3.68  | 1.74E-01 | 14.96  | 7.32   | 4.09E-02 | -7.14  | 13.66 | 6.01E-01 | 3.62   | 9.87  | 7.14E-01 |
| cg21234265 | 5.92   | 3.01  | 4.89E-02 | 5.90   | 3.62  | 1.03E-01 | 7.42   | 7.90   | 3.47E-01 | 11.52  | 10.98 | 2.94E-01 | -0.99  | 10.01 | 9.22E-01 |
| cg22468065 | 29.19  | 14.82 | 4.89E-02 | 66.33  | 39.15 | 9.02E-02 | -88.72 | 160.96 | 5.81E-01 | 26.85  | 16.84 | 1.11E-01 | -5.01  | 54.72 | 9.27E-01 |
| cg12089360 | -32.80 | 16.65 | 4.89E-02 | -23.27 | 23.23 | 3.17E-01 | -37.24 | 68.18  | 5.85E-01 | -33.97 | 36.66 | 3.54E-01 | -52.69 | 35.47 | 1.37E-01 |
| cg08698835 | -17.30 | 8.78  | 4.89E-02 | -36.78 | 18.44 | 4.60E-02 | -6.98  | 27.34  | 7.99E-01 | -16.11 | 11.92 | 1.77E-01 | 3.97   | 24.59 | 8.72E-01 |
| cg18144655 | -9.88  | 5.01  | 4.89E-02 | 3.86   | 14.15 | 7.85E-01 | -15.69 | 19.08  | 4.11E-01 | -11.64 | 5.81  | 4.52E-02 | -10.10 | 20.38 | 6.20E-01 |
| cg09829382 | 12.01  | 6.10  | 4.89E-02 | 16.20  | 9.26  | 8.02E-02 | 15.06  | 16.10  | 3.50E-01 | 17.62  | 17.36 | 3.10E-01 | 2.16   | 11.15 | 8.46E-01 |
| cg12840024 | 17.53  | 8.90  | 4.89E-02 | 25.95  | 17.31 | 1.34E-01 | 26.14  | 18.79  | 1.64E-01 | 8.42   | 14.47 | 5.60E-01 | 12.20  | 24.47 | 6.18E-01 |
| cg08441850 | -6.34  | 3.22  | 4.89E-02 | -8.91  | 4.49  | 4.71E-02 | -3.81  | 7.97   | 6.33E-01 | -5.31  | 8.46  | 5.30E-01 | -2.06  | 7.62  | 7.87E-01 |
| cg26395374 | 22.18  | 11.26 | 4.89E-02 | 25.72  | 20.15 | 2.02E-01 | 7.17   | 20.50  | 7.26E-01 | 17.79  | 22.54 | 4.30E-01 | 55.24  | 30.47 | 6.99E-02 |
| cg12599390 | 10.92  | 5.55  | 4.89E-02 | 15.17  | 9.11  | 9.59E-02 | 7.16   | 12.79  | 5.76E-01 | 27.36  | 16.05 | 8.82E-02 | 2.14   | 9.77  | 8.27E-01 |
| cg10704545 | 12.07  | 6.13  | 4.89E-02 | 12.76  | 14.64 | 3.84E-01 | 42.20  | 27.84  | 1.30E-01 | 10.91  | 7.32  | 1.36E-01 | 1.95   | 22.28 | 9.30E-01 |
| cg26520844 | 28.41  | 14.43 | 4.89E-02 | -11.72 | 52.46 | 8.23E-01 | -64.00 | 192.93 | 7.40E-01 | 35.19  | 15.78 | 2.58E-02 | 3.10   | 49.93 | 9.50E-01 |
| cg26429140 | -13.16 | 6.68  | 4.89E-02 | -30.81 | 10.77 | 4.25E-03 | 5.21   | 20.82  | 8.02E-01 | -6.96  | 6.18  | 2.60E-01 | -13.26 | 13.30 | 3.19E-01 |
| cg02129962 | -10.07 | 5.11  | 4.89E-02 | -8.58  | 12.64 | 4.98E-01 | -3.80  | 20.59  | 8.53E-01 | -12.50 | 6.07  | 3.93E-02 | 7.00   | 20.18 | 7.29E-01 |
| cg26876114 | 13.87  | 7.04  | 4.89E-02 | 13.94  | 18.18 | 4.43E-01 | 22.30  | 21.11  | 2.91E-01 | 10.65  | 8.56  | 2.14E-01 | 33.53  | 28.16 | 2.34E-01 |
| cg11996817 | 12.37  | 6.28  | 4.89E-02 | 9.03   | 10.88 | 4.06E-01 | 16.89  | 14.46  | 2.43E-01 | 14.53  | 11.59 | 2.10E-01 | 10.34  | 14.63 | 4.80E-01 |

|            |        |       |          |        |       |          |        |        |          |        |       |          |        |       |          |
|------------|--------|-------|----------|--------|-------|----------|--------|--------|----------|--------|-------|----------|--------|-------|----------|
| cg24339512 | -11.39 | 5.79  | 4.89E-02 | -15.51 | 16.04 | 3.34E-01 | -9.25  | 21.55  | 6.68E-01 | -9.59  | 6.71  | 1.53E-01 | -28.73 | 24.58 | 2.43E-01 |
| cg08475401 | -12.45 | 6.32  | 4.89E-02 | 1.73   | 19.92 | 9.31E-01 | -16.59 | 30.40  | 5.85E-01 | -13.07 | 7.02  | 6.28E-02 | -29.03 | 29.73 | 3.29E-01 |
| cg23115933 | 7.35   | 3.73  | 4.89E-02 | 6.07   | 4.40  | 1.68E-01 | 16.15  | 11.48  | 1.59E-01 | 11.23  | 13.68 | 4.12E-01 | 4.37   | 11.74 | 7.09E-01 |
| cg12120406 | 12.16  | 6.17  | 4.89E-02 | 17.26  | 11.05 | 1.18E-01 | 11.86  | 14.94  | 4.27E-01 | 12.22  | 9.48  | 1.98E-01 | -4.75  | 20.27 | 8.15E-01 |
| cg23448348 | 9.83   | 4.99  | 4.89E-02 | 15.17  | 7.60  | 4.59E-02 | 9.61   | 14.02  | 4.93E-01 | 12.53  | 10.54 | 2.35E-01 | -3.45  | 10.72 | 7.48E-01 |
| cg03947478 | 45.66  | 23.19 | 4.89E-02 | 42.71  | 31.68 | 1.78E-01 | 106.95 | 79.42  | 1.78E-01 | 21.97  | 48.76 | 6.52E-01 | 56.87  | 59.31 | 3.38E-01 |
| cg14154973 | 31.53  | 16.01 | 4.89E-02 | 51.30  | 24.88 | 3.92E-02 | -22.40 | 44.13  | 6.12E-01 | 27.79  | 38.64 | 4.72E-01 | 29.97  | 30.14 | 3.20E-01 |
| cg07719258 | -16.75 | 8.51  | 4.89E-02 | -18.50 | 13.27 | 1.63E-01 | -45.23 | 17.24  | 8.68E-03 | -7.91  | 11.43 | 4.89E-01 | -0.81  | 17.74 | 9.64E-01 |
| cg26337312 | 18.39  | 9.34  | 4.89E-02 | 34.40  | 20.38 | 9.15E-02 | -9.15  | 24.67  | 7.11E-01 | 22.12  | 12.85 | 8.53E-02 | 6.75   | 27.13 | 8.03E-01 |
| cg11389756 | 4.51   | 2.29  | 4.90E-02 | 3.34   | 2.98  | 2.63E-01 | 11.19  | 5.59   | 4.54E-02 | 8.16   | 6.71  | 2.24E-01 | -2.34  | 6.50  | 7.19E-01 |
| cg25309558 | 39.66  | 20.14 | 4.90E-02 | 86.67  | 29.47 | 3.27E-03 | -65.22 | 143.38 | 6.49E-01 | 19.98  | 11.80 | 9.06E-02 | 37.95  | 41.02 | 3.55E-01 |
| cg27638713 | -29.75 | 15.11 | 4.90E-02 | -45.00 | 19.60 | 2.17E-02 | -20.36 | 51.62  | 6.93E-01 | -2.67  | 41.60 | 9.49E-01 | -4.89  | 34.82 | 8.88E-01 |
| cg23487517 | 11.48  | 5.83  | 4.90E-02 | 32.11  | 13.31 | 1.59E-02 | 10.45  | 19.81  | 5.98E-01 | 5.75   | 6.69  | 3.91E-01 | 11.48  | 19.64 | 5.59E-01 |
| cg15941413 | 23.32  | 11.85 | 4.90E-02 | 20.76  | 15.04 | 1.68E-01 | 63.23  | 48.02  | 1.88E-01 | 5.21   | 36.04 | 8.85E-01 | 28.64  | 25.81 | 2.67E-01 |
| cg08791424 | -30.89 | 15.69 | 4.90E-02 | -30.17 | 18.32 | 9.97E-02 | 29.56  | 88.10  | 7.37E-01 | -2.67  | 56.99 | 9.63E-01 | -59.57 | 39.26 | 1.29E-01 |
| cg05244236 | 15.00  | 7.62  | 4.90E-02 | 10.78  | 12.17 | 3.76E-01 | 8.54   | 18.96  | 6.52E-01 | 10.16  | 8.07  | 2.09E-01 | 55.14  | 21.81 | 1.15E-02 |
| cg01081737 | 5.26   | 2.67  | 4.90E-02 | 5.33   | 3.51  | 1.29E-01 | 9.55   | 7.07   | 1.77E-01 | 5.52   | 7.01  | 4.31E-01 | 0.11   | 7.30  | 9.88E-01 |
| cg12888534 | 16.27  | 8.26  | 4.90E-02 | 35.94  | 22.79 | 1.15E-01 | -19.32 | 51.08  | 7.05E-01 | 13.49  | 9.45  | 1.54E-01 | 22.21  | 29.47 | 4.51E-01 |
| cg14919455 | 5.56   | 2.82  | 4.90E-02 | 4.62   | 3.57  | 1.96E-01 | 12.35  | 7.41   | 9.58E-02 | 3.98   | 8.68  | 6.46E-01 | 3.71   | 8.05  | 6.45E-01 |
| cg09032423 | 8.72   | 4.43  | 4.90E-02 | 14.30  | 6.61  | 3.05E-02 | -0.94  | 10.28  | 9.27E-01 | 6.55   | 7.62  | 3.90E-01 | 9.27   | 26.06 | 7.22E-01 |
| cg26108416 | -9.53  | 4.84  | 4.90E-02 | -12.98 | 6.88  | 5.90E-02 | -9.58  | 12.11  | 4.29E-01 | -2.82  | 15.67 | 8.57E-01 | -5.20  | 9.70  | 5.92E-01 |
| cg08617346 | -9.13  | 4.64  | 4.90E-02 | -9.41  | 9.59  | 3.26E-01 | -7.96  | 13.08  | 5.43E-01 | -12.15 | 6.34  | 5.55E-02 | 5.25   | 14.19 | 7.11E-01 |
| cg08134070 | -5.99  | 3.04  | 4.90E-02 | -7.88  | 4.50  | 8.02E-02 | -3.35  | 6.90   | 6.28E-01 | -10.40 | 8.50  | 2.21E-01 | -1.86  | 6.47  | 7.74E-01 |
| cg00083659 | 17.11  | 8.69  | 4.90E-02 | 4.93   | 9.49  | 6.03E-01 | 32.10  | 39.90  | 4.21E-01 | 44.41  | 20.31 | 2.88E-02 | 21.49  | 14.77 | 1.46E-01 |
| cg04327181 | 14.03  | 7.13  | 4.90E-02 | 16.92  | 18.20 | 3.52E-01 | 15.20  | 21.44  | 4.78E-01 | 12.81  | 10.09 | 2.04E-01 | 14.19  | 14.64 | 3.33E-01 |
| cg00857536 | -11.69 | 5.94  | 4.90E-02 | -19.53 | 10.10 | 5.33E-02 | 0.37   | 15.80  | 9.81E-01 | -8.03  | 10.59 | 4.48E-01 | -12.43 | 13.32 | 3.51E-01 |
| cg18261462 | 30.02  | 15.25 | 4.90E-02 | 9.19   | 49.64 | 8.53E-01 | 27.08  | 152.35 | 8.59E-01 | 33.85  | 16.72 | 4.29E-02 | 11.39  | 60.37 | 8.50E-01 |
| cg00453717 | 4.42   | 2.24  | 4.90E-02 | 4.16   | 2.94  | 1.57E-01 | 11.47  | 5.52   | 3.77E-02 | 0.42   | 6.11  | 9.45E-01 | 0.31   | 6.58  | 9.62E-01 |
| cg14289542 | 11.60  | 5.89  | 4.90E-02 | 23.27  | 10.52 | 2.70E-02 | 6.66   | 15.59  | 6.70E-01 | 15.15  | 12.41 | 2.22E-01 | -0.20  | 10.44 | 9.85E-01 |
| cg20302420 | 30.37  | 15.43 | 4.90E-02 | 7.41   | 42.72 | 8.62E-01 | -38.36 | 190.86 | 8.41E-01 | 34.13  | 17.38 | 4.95E-02 | 36.71  | 56.35 | 5.15E-01 |
| cg03041738 | 31.42  | 15.96 | 4.90E-02 | 41.04  | 20.66 | 4.70E-02 | 21.52  | 58.46  | 7.13E-01 | 71.60  | 52.13 | 1.70E-01 | -5.86  | 32.91 | 8.59E-01 |
| cg24444059 | 14.99  | 7.62  | 4.90E-02 | 17.81  | 12.22 | 1.45E-01 | 19.12  | 14.76  | 1.95E-01 | 11.06  | 19.35 | 5.68E-01 | 6.69   | 17.44 | 7.01E-01 |
| cg23181573 | 5.74   | 2.92  | 4.90E-02 | 6.53   | 3.94  | 9.77E-02 | 13.16  | 6.72   | 5.01E-02 | -0.90  | 9.19  | 9.22E-01 | -1.39  | 7.24  | 8.47E-01 |
| cg01513307 | 12.87  | 6.54  | 4.90E-02 | 5.23   | 9.98  | 6.00E-01 | 22.14  | 16.54  | 1.81E-01 | 18.01  | 21.69 | 4.06E-01 | 17.10  | 11.50 | 1.37E-01 |
| cg02180189 | -10.90 | 5.54  | 4.90E-02 | -11.20 | 8.92  | 2.09E-01 | -19.04 | 14.32  | 1.84E-01 | -0.14  | 9.88  | 9.89E-01 | -24.34 | 14.20 | 8.65E-02 |

|            |        |       |          |        |       |          |         |        |          |        |       |          |        |       |          |
|------------|--------|-------|----------|--------|-------|----------|---------|--------|----------|--------|-------|----------|--------|-------|----------|
| cg00044665 | 9.02   | 4.58  | 4.90E-02 | 14.30  | 6.46  | 2.68E-02 | 13.40   | 13.24  | 3.12E-01 | 3.31   | 10.44 | 7.51E-01 | -2.29  | 10.69 | 8.30E-01 |
| cg02072018 | -6.66  | 3.38  | 4.90E-02 | -3.98  | 4.87  | 4.13E-01 | -6.21   | 7.89   | 4.31E-01 | -4.82  | 9.78  | 6.22E-01 | -14.10 | 7.31  | 5.38E-02 |
| cg03781748 | -8.54  | 4.34  | 4.90E-02 | -15.54 | 11.61 | 1.81E-01 | 14.69   | 18.90  | 4.37E-01 | -6.87  | 5.10  | 1.79E-01 | -22.15 | 13.38 | 9.79E-02 |
| cg21834860 | -23.53 | 11.95 | 4.90E-02 | -9.31  | 34.39 | 7.87E-01 | -206.82 | 141.75 | 1.45E-01 | -26.60 | 13.43 | 4.77E-02 | 1.63   | 42.20 | 9.69E-01 |
| cg17624891 | -17.56 | 8.92  | 4.90E-02 | -7.85  | 19.93 | 6.94E-01 | -37.96  | 22.34  | 8.92E-02 | -14.86 | 11.86 | 2.10E-01 | -20.39 | 32.60 | 5.32E-01 |
| cg22967122 | 30.92  | 15.71 | 4.90E-02 | 71.42  | 36.80 | 5.23E-02 | -113.83 | 162.42 | 4.83E-01 | 29.39  | 17.22 | 8.79E-02 | -24.14 | 53.40 | 6.51E-01 |
| cg13745692 | 6.55   | 3.33  | 4.90E-02 | 13.81  | 9.29  | 1.37E-01 | -14.74  | 16.21  | 3.63E-01 | 5.17   | 4.02  | 1.98E-01 | 12.97  | 8.81  | 1.41E-01 |
| cg17743732 | 11.68  | 5.93  | 4.90E-02 | 8.27   | 14.41 | 5.66E-01 | 22.22   | 24.80  | 3.70E-01 | 13.09  | 7.19  | 6.88E-02 | 1.08   | 19.42 | 9.56E-01 |
| cg19546372 | 20.12  | 10.22 | 4.90E-02 | 34.08  | 16.07 | 3.39E-02 | 22.64   | 19.85  | 2.54E-01 | -9.59  | 25.91 | 7.11E-01 | 10.40  | 24.50 | 6.71E-01 |
| cg27295660 | 12.75  | 6.48  | 4.90E-02 | 17.41  | 11.51 | 1.30E-01 | 6.14    | 19.15  | 7.48E-01 | 12.15  | 9.41  | 1.97E-01 | 8.15   | 20.97 | 6.98E-01 |
| cg09975562 | 23.43  | 11.90 | 4.90E-02 | 33.90  | 21.45 | 1.14E-01 | -29.32  | 54.27  | 5.89E-01 | 18.50  | 17.12 | 2.80E-01 | 33.99  | 29.70 | 2.52E-01 |
| cg00807985 | 35.23  | 17.90 | 4.90E-02 | 34.84  | 49.54 | 4.82E-01 | -26.47  | 200.11 | 8.95E-01 | 34.35  | 20.44 | 9.28E-02 | 48.05  | 58.13 | 4.08E-01 |
| cg07233700 | 19.62  | 9.97  | 4.90E-02 | 7.81   | 12.90 | 5.45E-01 | 43.98   | 27.48  | 1.10E-01 | 60.63  | 32.17 | 5.95E-02 | 15.87  | 17.20 | 3.56E-01 |
| cg16003672 | -16.81 | 8.54  | 4.90E-02 | -7.45  | 20.66 | 7.18E-01 | -1.68   | 28.13  | 9.52E-01 | -22.09 | 10.48 | 3.50E-02 | -9.74  | 31.75 | 7.59E-01 |
| cg23199257 | 23.02  | 11.69 | 4.90E-02 | 37.56  | 18.78 | 4.56E-02 | 3.49    | 19.22  | 8.56E-01 | 10.39  | 12.30 | 3.98E-01 | 65.10  | 27.76 | 1.90E-02 |
| cg24687652 | 15.09  | 7.67  | 4.90E-02 | 0.36   | 13.87 | 9.79E-01 | 23.83   | 15.54  | 1.25E-01 | 16.10  | 14.02 | 2.51E-01 | 28.73  | 19.66 | 1.44E-01 |
| cg06281016 | -12.75 | 6.48  | 4.90E-02 | -22.21 | 12.38 | 7.27E-02 | -2.90   | 14.56  | 8.42E-01 | -2.15  | 16.18 | 8.94E-01 | -15.61 | 10.67 | 1.44E-01 |
| cg09622982 | 18.57  | 9.44  | 4.90E-02 | 21.26  | 12.79 | 9.65E-02 | 8.00    | 29.54  | 7.86E-01 | 11.93  | 25.59 | 6.41E-01 | 20.94  | 20.21 | 3.00E-01 |
| cg24451981 | -26.67 | 13.55 | 4.90E-02 | -73.51 | 40.83 | 7.18E-02 | 82.43   | 215.64 | 7.02E-01 | -23.86 | 14.98 | 1.11E-01 | 9.31   | 52.17 | 8.58E-01 |
| cg17347335 | 6.31   | 3.21  | 4.90E-02 | 4.39   | 6.08  | 4.70E-01 | 4.91    | 7.29   | 5.00E-01 | 6.32   | 5.08  | 2.14E-01 | 12.51  | 8.91  | 1.60E-01 |
| cg26346875 | -5.06  | 2.57  | 4.90E-02 | -5.01  | 2.60  | 5.40E-02 | 29.88   | 32.76  | 3.62E-01 | -0.43  | 39.08 | 9.91E-01 | -26.10 | 22.26 | 2.41E-01 |
| cg21837323 | -6.96  | 3.54  | 4.90E-02 | -6.44  | 7.25  | 3.74E-01 | -1.02   | 9.61   | 9.15E-01 | -5.34  | 5.06  | 2.91E-01 | -19.37 | 9.51  | 4.16E-02 |
| cg07211465 | -9.93  | 5.05  | 4.90E-02 | -11.22 | 13.17 | 3.94E-01 | -16.35  | 21.98  | 4.57E-01 | -8.87  | 5.99  | 1.39E-01 | -12.45 | 16.75 | 4.57E-01 |
| cg01111718 | -10.21 | 5.19  | 4.91E-02 | -10.85 | 10.47 | 3.00E-01 | -14.51  | 21.51  | 5.00E-01 | -10.55 | 6.78  | 1.19E-01 | -4.68  | 15.58 | 7.64E-01 |
| cg04290349 | 30.23  | 15.36 | 4.91E-02 | 22.45  | 19.62 | 2.53E-01 | 12.24   | 53.47  | 8.19E-01 | -4.84  | 67.98 | 9.43E-01 | 61.97  | 30.50 | 4.22E-02 |
| cg17060964 | -6.42  | 3.26  | 4.91E-02 | -7.48  | 6.22  | 2.30E-01 | 4.01    | 9.08   | 6.59E-01 | -10.14 | 4.76  | 3.33E-02 | -0.99  | 9.19  | 9.14E-01 |
| cg24119469 | 4.88   | 2.48  | 4.91E-02 | 6.60   | 3.40  | 5.25E-02 | 0.91    | 5.46   | 8.68E-01 | 9.89   | 9.20  | 2.82E-01 | 2.47   | 5.67  | 6.63E-01 |
| cg18117048 | -11.97 | 6.08  | 4.91E-02 | -14.31 | 8.50  | 9.25E-02 | 0.47    | 14.43  | 9.74E-01 | -26.67 | 19.01 | 1.61E-01 | -9.62  | 13.33 | 4.70E-01 |
| cg04654716 | 10.23  | 5.20  | 4.91E-02 | 9.52   | 7.14  | 1.82E-01 | 16.32   | 12.22  | 1.82E-01 | 23.26  | 14.51 | 1.09E-01 | -4.79  | 13.01 | 7.13E-01 |
| cg10304637 | 18.11  | 9.20  | 4.91E-02 | 33.14  | 15.40 | 3.14E-02 | 76.70   | 54.48  | 1.59E-01 | 6.52   | 5.39  | 2.27E-01 | 23.76  | 16.97 | 1.61E-01 |
| cg03530754 | 11.65  | 5.92  | 4.91E-02 | 24.80  | 14.91 | 9.63E-02 | 15.62   | 19.47  | 4.23E-01 | 12.84  | 10.02 | 2.00E-01 | 4.54   | 9.35  | 6.28E-01 |
| cg25011763 | 14.24  | 7.24  | 4.91E-02 | -2.17  | 23.19 | 9.25E-01 | 43.16   | 32.95  | 1.90E-01 | 16.16  | 8.11  | 4.63E-02 | -8.47  | 29.92 | 7.77E-01 |
| cg08142943 | -40.56 | 20.61 | 4.91E-02 | -37.92 | 24.77 | 1.26E-01 | -4.69   | 131.46 | 9.72E-01 | -31.70 | 95.57 | 7.40E-01 | -53.74 | 42.37 | 2.05E-01 |
| cg14625154 | -12.29 | 6.24  | 4.91E-02 | -14.90 | 8.44  | 7.77E-02 | -7.98   | 16.25  | 6.24E-01 | 0.27   | 19.75 | 9.89E-01 | -14.52 | 13.75 | 2.91E-01 |
| cg07180188 | 14.53  | 7.38  | 4.91E-02 | 37.03  | 23.57 | 1.16E-01 | 23.10   | 26.87  | 3.90E-01 | 8.28   | 8.46  | 3.28E-01 | 44.37  | 29.18 | 1.28E-01 |

|            |        |       |          |        |       |          |         |        |          |        |       |          |        |       |          |
|------------|--------|-------|----------|--------|-------|----------|---------|--------|----------|--------|-------|----------|--------|-------|----------|
| cg12032663 | 26.44  | 13.44 | 4.91E-02 | 41.51  | 18.30 | 2.33E-02 | 7.69    | 32.20  | 8.11E-01 | 22.62  | 44.36 | 6.10E-01 | 3.33   | 30.42 | 9.13E-01 |
| cg21569844 | -33.18 | 16.86 | 4.91E-02 | -29.08 | 21.85 | 1.83E-01 | -31.02  | 48.85  | 5.25E-01 | -5.07  | 61.67 | 9.34E-01 | -56.02 | 36.77 | 1.28E-01 |
| cg04865220 | 15.03  | 7.64  | 4.91E-02 | 10.62  | 21.52 | 6.22E-01 | 26.92   | 32.23  | 4.03E-01 | 15.79  | 8.74  | 7.09E-02 | 2.28   | 32.89 | 9.45E-01 |
| cg18543142 | -7.84  | 3.98  | 4.91E-02 | -11.09 | 8.39  | 1.86E-01 | -0.80   | 12.68  | 9.49E-01 | -6.94  | 5.41  | 2.00E-01 | -11.18 | 10.87 | 3.04E-01 |
| cg09868451 | -28.60 | 14.53 | 4.91E-02 | -47.60 | 48.49 | 3.26E-01 | -52.89  | 205.49 | 7.97E-01 | -30.64 | 15.75 | 5.17E-02 | 37.51  | 62.58 | 5.49E-01 |
| cg08700197 | -17.97 | 9.13  | 4.91E-02 | -20.09 | 17.71 | 2.57E-01 | 9.94    | 29.59  | 7.37E-01 | -18.84 | 12.63 | 1.36E-01 | -32.05 | 26.76 | 2.31E-01 |
| cg08344485 | -12.17 | 6.18  | 4.91E-02 | -14.17 | 10.79 | 1.89E-01 | -3.30   | 15.59  | 8.32E-01 | -16.10 | 10.38 | 1.21E-01 | -8.02  | 15.49 | 6.05E-01 |
| cg25833597 | 13.77  | 7.00  | 4.91E-02 | 2.10   | 18.81 | 9.11E-01 | 27.57   | 24.50  | 2.60E-01 | 16.14  | 8.27  | 5.12E-02 | -4.69  | 27.37 | 8.64E-01 |
| cg04241725 | 32.61  | 16.57 | 4.91E-02 | 29.45  | 18.56 | 1.12E-01 | -41.90  | 105.60 | 6.92E-01 | 14.41  | 93.41 | 8.77E-01 | 66.18  | 43.28 | 1.26E-01 |
| cg05025071 | 3.87   | 1.97  | 4.91E-02 | 2.38   | 2.63  | 3.65E-01 | 7.04    | 4.32   | 1.03E-01 | 5.63   | 4.99  | 2.60E-01 | 2.62   | 7.07  | 7.11E-01 |
| cg00137855 | 9.14   | 4.65  | 4.91E-02 | 0.38   | 8.61  | 9.64E-01 | -3.55   | 12.89  | 7.83E-01 | 15.98  | 4.98  | 1.34E-03 | 10.06  | 10.68 | 3.46E-01 |
| cg00458932 | -7.90  | 4.01  | 4.91E-02 | -10.61 | 5.76  | 6.55E-02 | -4.12   | 9.32   | 6.58E-01 | 4.64   | 10.80 | 6.67E-01 | -13.77 | 9.20  | 1.34E-01 |
| cg01900413 | 8.90   | 4.52  | 4.91E-02 | 12.45  | 7.09  | 7.93E-02 | 11.58   | 11.19  | 3.01E-01 | 5.26   | 10.05 | 6.01E-01 | 3.88   | 9.49  | 6.83E-01 |
| cg06601203 | -8.27  | 4.20  | 4.91E-02 | -7.00  | 5.81  | 2.28E-01 | -18.77  | 10.01  | 6.09E-02 | 4.25   | 11.13 | 7.02E-01 | -12.08 | 10.59 | 2.54E-01 |
| cg06172871 | 5.83   | 2.96  | 4.91E-02 | 6.91   | 3.94  | 7.95E-02 | 8.15    | 7.39   | 2.70E-01 | 4.75   | 8.69  | 5.85E-01 | 0.42   | 7.43  | 9.55E-01 |
| cg10606620 | -9.86  | 5.01  | 4.91E-02 | -6.64  | 9.09  | 4.65E-01 | -6.75   | 14.57  | 6.43E-01 | -10.39 | 7.35  | 1.58E-01 | -19.59 | 14.89 | 1.88E-01 |
| cg13716619 | 11.66  | 5.92  | 4.91E-02 | 3.12   | 8.91  | 7.26E-01 | 22.38   | 13.51  | 9.77E-02 | 11.57  | 14.14 | 4.13E-01 | 20.74  | 13.58 | 1.27E-01 |
| cg01493727 | 8.86   | 4.50  | 4.91E-02 | 6.44   | 6.53  | 3.24E-01 | 12.41   | 12.82  | 3.33E-01 | 17.01  | 10.76 | 1.14E-01 | 5.69   | 9.47  | 5.48E-01 |
| cg04850548 | 43.79  | 22.26 | 4.91E-02 | 117.28 | 54.00 | 2.99E-02 | -176.43 | 227.55 | 4.38E-01 | 29.00  | 20.42 | 1.56E-01 | 54.01  | 61.52 | 3.80E-01 |
| cg01300434 | -7.51  | 3.82  | 4.91E-02 | -8.61  | 5.17  | 9.56E-02 | 2.18    | 9.53   | 8.19E-01 | -6.53  | 15.00 | 6.63E-01 | -11.99 | 8.00  | 1.34E-01 |
| cg14525402 | 9.77   | 4.97  | 4.91E-02 | -0.64  | 7.00  | 9.27E-01 | 16.67   | 9.69   | 8.54E-02 | 18.19  | 6.46  | 4.86E-03 | 4.86   | 9.47  | 6.08E-01 |
| cg05858607 | 12.52  | 6.36  | 4.91E-02 | 30.11  | 30.67 | 3.26E-01 | 37.77   | 64.07  | 5.56E-01 | 12.51  | 6.87  | 6.87E-02 | 1.34   | 21.34 | 9.50E-01 |
| cg13990743 | -7.72  | 3.92  | 4.91E-02 | -8.15  | 7.96  | 3.06E-01 | -7.70   | 17.40  | 6.58E-01 | -4.20  | 5.20  | 4.20E-01 | -21.61 | 10.61 | 4.16E-02 |
| cg19909623 | -26.62 | 13.53 | 4.91E-02 | -24.20 | 18.44 | 1.89E-01 | -14.57  | 37.27  | 6.96E-01 | -36.66 | 37.07 | 3.23E-01 | -34.51 | 30.52 | 2.58E-01 |
| cg18487598 | -18.17 | 9.24  | 4.91E-02 | -24.23 | 14.68 | 9.88E-02 | -8.60   | 23.76  | 7.17E-01 | -26.52 | 20.08 | 1.86E-01 | -6.90  | 18.80 | 7.14E-01 |
| cg05913598 | 34.38  | 17.48 | 4.91E-02 | 27.69  | 20.79 | 1.83E-01 | 48.70   | 106.76 | 6.48E-01 | 96.41  | 90.10 | 2.85E-01 | 43.16  | 36.51 | 2.37E-01 |
| cg02169542 | -12.67 | 6.44  | 4.91E-02 | -17.53 | 13.38 | 1.90E-01 | -1.90   | 16.09  | 9.06E-01 | -14.61 | 9.31  | 1.17E-01 | -10.16 | 17.88 | 5.70E-01 |
| cg09744036 | 13.76  | 7.00  | 4.91E-02 | 20.29  | 10.83 | 6.10E-02 | 16.68   | 13.92  | 2.31E-01 | 4.93   | 18.61 | 7.91E-01 | 2.04   | 16.10 | 8.99E-01 |
| cg03223126 | 15.19  | 7.72  | 4.92E-02 | 23.38  | 36.83 | 5.26E-01 | -60.14  | 134.14 | 6.54E-01 | 13.99  | 8.15  | 8.62E-02 | 32.34  | 32.58 | 3.21E-01 |
| cg26736645 | -11.07 | 5.63  | 4.92E-02 | 5.08   | 17.34 | 7.69E-01 | -4.74   | 27.30  | 8.62E-01 | -11.90 | 6.39  | 6.27E-02 | -28.08 | 20.16 | 1.64E-01 |
| cg07075238 | -19.00 | 9.66  | 4.92E-02 | -10.93 | 12.39 | 3.78E-01 | -37.28  | 55.68  | 5.03E-01 | -51.50 | 29.53 | 8.12E-02 | -22.43 | 19.11 | 2.41E-01 |
| cg25513535 | -6.03  | 3.06  | 4.92E-02 | -12.00 | 6.26  | 5.55E-02 | -2.69   | 8.38   | 7.48E-01 | -5.10  | 4.32  | 2.37E-01 | -1.86  | 8.71  | 8.31E-01 |
| cg16208136 | 28.36  | 14.42 | 4.92E-02 | 36.39  | 18.28 | 4.66E-02 | -32.83  | 78.22  | 6.75E-01 | 54.08  | 48.85 | 2.68E-01 | 8.33   | 28.43 | 7.70E-01 |
| cg17887364 | 6.59   | 3.35  | 4.92E-02 | 0.80   | 6.12  | 8.96E-01 | 10.44   | 7.02   | 1.37E-01 | 10.19  | 5.72  | 7.50E-02 | 3.70   | 9.28  | 6.90E-01 |
| cg22725460 | -39.54 | 20.10 | 4.92E-02 | -31.74 | 26.57 | 2.32E-01 | -82.45  | 65.95  | 2.11E-01 | 16.85  | 58.90 | 7.75E-01 | -71.80 | 43.02 | 9.51E-02 |

|            |        |       |          |        |       |          |         |        |          |        |       |          |        |       |          |
|------------|--------|-------|----------|--------|-------|----------|---------|--------|----------|--------|-------|----------|--------|-------|----------|
| cg16325251 | -17.01 | 8.65  | 4.92E-02 | 0.59   | 23.93 | 9.80E-01 | -75.83  | 46.46  | 1.03E-01 | -19.53 | 9.86  | 4.76E-02 | 8.65   | 33.79 | 7.98E-01 |
| cg22303739 | 35.95  | 18.28 | 4.92E-02 | 44.88  | 25.25 | 7.55E-02 | 117.41  | 73.49  | 1.10E-01 | 17.79  | 50.10 | 7.22E-01 | 9.98   | 34.47 | 7.72E-01 |
| cg10226527 | 19.58  | 9.95  | 4.92E-02 | 5.64   | 18.67 | 7.63E-01 | 49.33   | 26.51  | 6.28E-02 | 15.94  | 28.60 | 5.77E-01 | 20.03  | 14.77 | 1.75E-01 |
| cg22572214 | -29.20 | 14.84 | 4.92E-02 | -28.79 | 16.46 | 8.02E-02 | 39.22   | 129.93 | 7.63E-01 | -97.80 | 90.01 | 2.77E-01 | -24.82 | 38.84 | 5.23E-01 |
| cg15224187 | 25.60  | 13.02 | 4.92E-02 | 46.22  | 42.76 | 2.80E-01 | -66.71  | 179.35 | 7.10E-01 | 25.58  | 14.46 | 7.68E-02 | 10.22  | 43.10 | 8.12E-01 |
| cg12614630 | 4.68   | 2.38  | 4.92E-02 | 4.42   | 3.02  | 1.43E-01 | 10.84   | 6.02   | 7.16E-02 | 2.85   | 7.26  | 6.95E-01 | -0.61  | 7.05  | 9.32E-01 |
| cg19947611 | -8.93  | 4.54  | 4.92E-02 | -9.65  | 7.26  | 1.83E-01 | 2.53    | 9.90   | 7.98E-01 | -6.02  | 10.03 | 5.48E-01 | -21.30 | 9.66  | 2.74E-02 |
| cg23678565 | 28.71  | 14.60 | 4.92E-02 | 28.53  | 22.02 | 1.95E-01 | -20.73  | 50.95  | 6.84E-01 | 18.40  | 13.45 | 1.71E-01 | 84.25  | 33.12 | 1.10E-02 |
| cg14075393 | 11.69  | 5.94  | 4.92E-02 | 5.74   | 11.50 | 6.18E-01 | 3.34    | 22.14  | 8.80E-01 | 13.91  | 7.93  | 7.93E-02 | 21.34  | 18.97 | 2.61E-01 |
| cg05580141 | 4.33   | 2.20  | 4.92E-02 | 3.33   | 2.80  | 2.34E-01 | 7.76    | 5.10   | 1.28E-01 | 4.77   | 7.09  | 5.01E-01 | 3.69   | 7.10  | 6.03E-01 |
| cg12697116 | 8.53   | 4.34  | 4.92E-02 | 8.94   | 6.17  | 1.48E-01 | 14.13   | 11.40  | 2.15E-01 | 13.72  | 14.40 | 3.41E-01 | 3.06   | 8.34  | 7.14E-01 |
| cg00704734 | 32.08  | 16.31 | 4.92E-02 | 17.25  | 22.10 | 4.35E-01 | 30.41   | 65.36  | 6.42E-01 | 40.87  | 35.99 | 2.56E-01 | 66.01  | 37.63 | 7.94E-02 |
| cg12528016 | 27.10  | 13.78 | 4.92E-02 | 25.10  | 36.57 | 4.92E-01 | 104.39  | 145.37 | 4.73E-01 | 31.54  | 15.54 | 4.24E-02 | -34.95 | 54.92 | 5.25E-01 |
| cg13995774 | 4.72   | 2.40  | 4.92E-02 | 3.71   | 3.03  | 2.21E-01 | 11.24   | 6.44   | 8.08E-02 | 7.66   | 7.25  | 2.91E-01 | -0.09  | 6.86  | 9.90E-01 |
| cg05441854 | 8.55   | 4.35  | 4.92E-02 | 11.98  | 7.25  | 9.84E-02 | 11.60   | 10.50  | 2.69E-01 | 7.82   | 9.37  | 4.04E-01 | 2.25   | 8.61  | 7.94E-01 |
| cg04897631 | 17.55  | 8.92  | 4.92E-02 | 38.69  | 13.31 | 3.65E-03 | 3.07    | 11.51  | 7.89E-01 | 12.07  | 14.88 | 4.17E-01 | 20.24  | 26.47 | 4.44E-01 |
| cg04128367 | -18.01 | 9.16  | 4.92E-02 | -27.11 | 11.93 | 2.30E-02 | 1.72    | 25.23  | 9.46E-01 | 12.34  | 31.22 | 6.93E-01 | -17.23 | 20.88 | 4.09E-01 |
| cg08245702 | 18.90  | 9.61  | 4.92E-02 | 25.02  | 21.70 | 2.49E-01 | 18.43   | 19.62  | 3.48E-01 | 13.28  | 14.56 | 3.62E-01 | 29.51  | 26.83 | 2.72E-01 |
| cg10274099 | 19.25  | 9.79  | 4.92E-02 | 43.56  | 29.12 | 1.35E-01 | -39.74  | 92.62  | 6.68E-01 | 17.58  | 10.88 | 1.06E-01 | 8.23   | 37.74 | 8.27E-01 |
| cg01139031 | 27.80  | 14.14 | 4.92E-02 | 25.82  | 15.98 | 1.06E-01 | 91.32   | 97.24  | 3.48E-01 | -75.33 | 78.52 | 3.37E-01 | 49.48  | 34.94 | 1.57E-01 |
| cg23624133 | 10.31  | 5.24  | 4.92E-02 | 8.28   | 10.73 | 4.40E-01 | 3.39    | 22.12  | 8.78E-01 | 12.58  | 6.85  | 6.62E-02 | 6.49   | 15.23 | 6.70E-01 |
| cg08060322 | 19.37  | 9.85  | 4.92E-02 | 19.27  | 20.18 | 3.40E-01 | -0.31   | 26.95  | 9.91E-01 | 18.41  | 14.37 | 2.00E-01 | 38.90  | 24.71 | 1.15E-01 |
| cg17308044 | -7.72  | 3.92  | 4.92E-02 | -14.97 | 7.43  | 4.38E-02 | 0.37    | 12.30  | 9.76E-01 | -6.41  | 5.53  | 2.47E-01 | -3.02  | 11.53 | 7.93E-01 |
| cg12807668 | -6.71  | 3.41  | 4.92E-02 | -13.26 | 5.98  | 2.66E-02 | -4.80   | 7.55   | 5.25E-01 | -4.62  | 6.06  | 4.46E-01 | 0.31   | 8.72  | 9.71E-01 |
| cg23275502 | 46.94  | 23.87 | 4.92E-02 | 88.58  | 56.86 | 1.19E-01 | -103.71 | 230.32 | 6.53E-01 | 57.19  | 22.79 | 1.21E-02 | -45.68 | 63.34 | 4.71E-01 |
| cg12010995 | -8.50  | 4.32  | 4.92E-02 | -7.83  | 7.40  | 2.90E-01 | -10.34  | 10.50  | 3.25E-01 | -11.06 | 6.87  | 1.07E-01 | 3.20   | 14.10 | 8.21E-01 |
| cg16120927 | -64.01 | 32.55 | 4.92E-02 | -13.90 | 30.91 | 6.53E-01 | -176.41 | 62.15  | 4.53E-03 | -68.98 | 57.49 | 2.30E-01 | -51.20 | 47.72 | 2.83E-01 |
| cg08462924 | 13.48  | 6.86  | 4.92E-02 | 9.72   | 10.88 | 3.71E-01 | 8.38    | 15.95  | 5.99E-01 | 30.20  | 17.92 | 9.19E-02 | 13.43  | 13.15 | 3.07E-01 |
| cg10148145 | 17.47  | 8.88  | 4.92E-02 | 33.11  | 17.63 | 6.03E-02 | 1.48    | 19.17  | 9.38E-01 | 14.60  | 13.42 | 2.77E-01 | 25.05  | 29.00 | 3.88E-01 |
| cg22021794 | -9.33  | 4.74  | 4.92E-02 | -10.04 | 6.45  | 1.20E-01 | -17.47  | 10.62  | 9.99E-02 | 4.17   | 8.90  | 6.40E-01 | -17.79 | 10.53 | 9.12E-02 |
| cg12229404 | 7.13   | 3.63  | 4.92E-02 | 12.55  | 7.33  | 8.68E-02 | 5.59    | 9.67   | 5.63E-01 | 5.76   | 5.79  | 3.20E-01 | 4.56   | 7.69  | 5.53E-01 |
| cg23746574 | 23.93  | 12.17 | 4.92E-02 | 19.87  | 24.41 | 4.16E-01 | 85.91   | 83.79  | 3.05E-01 | 25.06  | 17.91 | 1.62E-01 | 20.88  | 23.47 | 3.74E-01 |
| cg10617782 | -7.56  | 3.84  | 4.92E-02 | -9.67  | 6.46  | 1.34E-01 | -5.50   | 8.52   | 5.18E-01 | -9.01  | 6.90  | 1.91E-01 | -1.65  | 10.57 | 8.76E-01 |
| cg19470459 | 20.97  | 10.66 | 4.92E-02 | 39.80  | 19.59 | 4.22E-02 | 16.50   | 24.50  | 5.01E-01 | 14.44  | 17.53 | 4.10E-01 | 4.94   | 28.03 | 8.60E-01 |
| cg01270593 | 11.59  | 5.89  | 4.92E-02 | 5.61   | 11.03 | 6.11E-01 | 21.21   | 13.80  | 1.24E-01 | 17.79  | 10.70 | 9.65E-02 | 3.17   | 12.30 | 7.97E-01 |

|            |        |       |          |        |       |          |         |        |          |        |       |          |        |       |          |
|------------|--------|-------|----------|--------|-------|----------|---------|--------|----------|--------|-------|----------|--------|-------|----------|
| cg13613180 | -9.57  | 4.87  | 4.93E-02 | -4.84  | 11.33 | 6.69E-01 | 1.58    | 18.45  | 9.32E-01 | -11.06 | 5.82  | 5.74E-02 | -22.36 | 22.39 | 3.18E-01 |
| cg00063111 | 9.08   | 4.62  | 4.93E-02 | 6.23   | 6.35  | 3.26E-01 | 20.35   | 9.26   | 2.80E-02 | 20.35  | 23.17 | 3.80E-01 | -0.45  | 10.81 | 9.67E-01 |
| cg13286582 | -6.50  | 3.31  | 4.93E-02 | -2.51  | 4.49  | 5.77E-01 | -11.99  | 9.11   | 1.88E-01 | -16.41 | 10.55 | 1.20E-01 | -8.53  | 6.91  | 2.17E-01 |
| cg23146663 | 11.25  | 5.72  | 4.93E-02 | 7.08   | 7.60  | 3.52E-01 | 11.80   | 16.39  | 4.72E-01 | 26.87  | 25.95 | 3.01E-01 | 17.09  | 11.15 | 1.25E-01 |
| cg04861968 | 19.04  | 9.68  | 4.93E-02 | 29.94  | 15.55 | 5.42E-02 | -3.34   | 29.58  | 9.10E-01 | 25.34  | 20.68 | 2.20E-01 | 7.81   | 18.10 | 6.66E-01 |
| cg05521717 | 16.25  | 8.27  | 4.93E-02 | 13.61  | 20.95 | 5.16E-01 | 6.72    | 33.94  | 8.43E-01 | 16.78  | 9.87  | 8.92E-02 | 23.49  | 28.50 | 4.10E-01 |
| cg14064694 | 26.37  | 13.41 | 4.93E-02 | 18.91  | 15.90 | 2.34E-01 | -0.14   | 55.32  | 9.98E-01 | 37.52  | 74.61 | 6.15E-01 | 59.21  | 30.15 | 4.95E-02 |
| cg22765308 | 14.00  | 7.12  | 4.93E-02 | 3.79   | 19.51 | 8.46E-01 | 11.78   | 22.04  | 5.93E-01 | 19.98  | 8.60  | 2.02E-02 | -18.55 | 25.69 | 4.70E-01 |
| cg01902704 | -13.58 | 6.91  | 4.93E-02 | -2.25  | 17.91 | 9.00E-01 | 4.39    | 17.94  | 8.07E-01 | -16.99 | 8.41  | 4.35E-02 | -46.60 | 27.20 | 8.67E-02 |
| cg17517854 | 23.39  | 11.90 | 4.93E-02 | 31.85  | 22.95 | 1.65E-01 | -29.61  | 85.84  | 7.30E-01 | 16.45  | 15.34 | 2.84E-01 | 49.69  | 35.71 | 1.64E-01 |
| cg14323608 | 14.11  | 7.17  | 4.93E-02 | 20.16  | 16.43 | 2.20E-01 | -2.49   | 19.45  | 8.98E-01 | 12.27  | 9.38  | 1.91E-01 | 38.78  | 24.13 | 1.08E-01 |
| cg18623980 | 14.81  | 7.53  | 4.93E-02 | 36.84  | 25.10 | 1.42E-01 | -3.77   | 61.19  | 9.51E-01 | 11.50  | 8.64  | 1.83E-01 | 20.86  | 20.54 | 3.10E-01 |
| cg18556976 | 6.19   | 3.15  | 4.93E-02 | 5.69   | 3.89  | 1.44E-01 | 18.52   | 8.34   | 2.63E-02 | -0.72  | 9.30  | 9.39E-01 | 1.46   | 8.50  | 8.64E-01 |
| cg16762030 | 4.63   | 2.36  | 4.93E-02 | 4.24   | 3.09  | 1.70E-01 | 5.51    | 6.06   | 3.63E-01 | 9.43   | 6.32  | 1.36E-01 | 0.18   | 6.58  | 9.78E-01 |
| cg05648629 | -8.57  | 4.36  | 4.93E-02 | -13.55 | 6.70  | 4.32E-02 | 3.25    | 12.62  | 7.97E-01 | -9.94  | 7.89  | 2.07E-01 | -1.25  | 11.14 | 9.11E-01 |
| cg13022624 | 18.20  | 9.26  | 4.93E-02 | 30.19  | 21.20 | 1.54E-01 | 31.96   | 41.02  | 4.36E-01 | 13.47  | 11.48 | 2.41E-01 | 19.08  | 28.23 | 4.99E-01 |
| cg14171486 | 8.26   | 4.20  | 4.93E-02 | 12.26  | 5.83  | 3.53E-02 | 5.89    | 10.82  | 5.86E-01 | 7.46   | 12.92 | 5.63E-01 | 0.92   | 8.90  | 9.18E-01 |
| cg13717725 | 26.91  | 13.68 | 4.93E-02 | 26.86  | 32.02 | 4.01E-01 | 96.58   | 120.42 | 4.23E-01 | 25.34  | 16.70 | 1.29E-01 | 28.13  | 37.57 | 4.54E-01 |
| cg23225103 | -7.73  | 3.93  | 4.93E-02 | 0.50   | 7.40  | 9.47E-01 | -10.40  | 6.62   | 1.16E-01 | -14.21 | 8.87  | 1.09E-01 | -8.38  | 9.58  | 3.82E-01 |
| cg20208801 | -8.78  | 4.47  | 4.93E-02 | 4.36   | 14.31 | 7.60E-01 | 14.30   | 20.65  | 4.89E-01 | -10.45 | 5.09  | 3.99E-02 | -21.53 | 15.38 | 1.61E-01 |
| cg20423409 | 14.93  | 7.59  | 4.93E-02 | 22.32  | 12.81 | 8.15E-02 | 9.25    | 13.03  | 4.78E-01 | 24.63  | 18.03 | 1.72E-01 | -3.21  | 20.92 | 8.78E-01 |
| cg14672921 | 21.15  | 10.76 | 4.93E-02 | 18.55  | 13.73 | 1.77E-01 | 66.17   | 33.38  | 4.75E-02 | 35.92  | 21.24 | 9.08E-02 | 0.60   | 16.43 | 9.71E-01 |
| cg01903327 | -8.41  | 4.28  | 4.93E-02 | -8.43  | 9.11  | 3.55E-01 | -5.91   | 13.16  | 6.53E-01 | -6.22  | 5.88  | 2.90E-01 | -18.21 | 11.24 | 1.05E-01 |
| cg00169725 | -9.58  | 4.87  | 4.93E-02 | -7.62  | 7.03  | 2.78E-01 | -18.31  | 10.74  | 8.81E-02 | -0.44  | 16.13 | 9.78E-01 | -9.47  | 10.34 | 3.60E-01 |
| cg14575356 | 4.11   | 2.09  | 4.93E-02 | 3.93   | 3.03  | 1.94E-01 | 10.07   | 5.21   | 5.34E-02 | 1.67   | 4.08  | 6.82E-01 | 1.78   | 6.68  | 7.90E-01 |
| cg06035839 | 15.86  | 8.07  | 4.93E-02 | 27.47  | 21.08 | 1.93E-01 | 26.77   | 40.01  | 5.03E-01 | 16.38  | 9.59  | 8.78E-02 | -7.98  | 24.87 | 7.48E-01 |
| cg16691087 | 5.04   | 2.57  | 4.93E-02 | 5.73   | 3.92  | 1.44E-01 | 7.34    | 6.34   | 2.47E-01 | 6.25   | 4.71  | 1.84E-01 | -4.26  | 7.73  | 5.81E-01 |
| cg19310322 | 12.48  | 6.35  | 4.93E-02 | 3.76   | 13.71 | 7.84E-01 | 11.27   | 31.72  | 7.22E-01 | 15.88  | 8.16  | 5.18E-02 | 11.52  | 16.95 | 4.97E-01 |
| cg12678073 | 13.25  | 6.74  | 4.93E-02 | 16.89  | 9.04  | 6.17E-02 | 33.32   | 17.12  | 5.16E-02 | 9.48   | 14.23 | 5.05E-01 | -5.71  | 14.44 | 6.93E-01 |
| cg14489346 | 19.23  | 9.78  | 4.93E-02 | -0.87  | 26.25 | 9.74E-01 | -113.76 | 104.36 | 2.76E-01 | 24.21  | 11.04 | 2.83E-02 | 19.99  | 37.87 | 5.98E-01 |
| cg09021952 | -9.02  | 4.59  | 4.93E-02 | -15.42 | 7.57  | 4.17E-02 | -17.05  | 10.98  | 1.21E-01 | 1.76   | 10.07 | 8.61E-01 | -2.98  | 9.15  | 7.44E-01 |
| cg25098478 | 18.29  | 9.30  | 4.93E-02 | 6.97   | 15.53 | 6.54E-01 | 32.20   | 16.64  | 5.29E-02 | 8.12   | 22.78 | 7.21E-01 | 26.94  | 23.10 | 2.44E-01 |
| cg23083774 | 9.04   | 4.60  | 4.93E-02 | 9.77   | 5.59  | 8.01E-02 | 21.78   | 12.36  | 7.81E-02 | -3.36  | 17.17 | 8.45E-01 | -3.24  | 13.78 | 8.14E-01 |
| cg26807935 | 21.22  | 10.79 | 4.93E-02 | 23.46  | 27.03 | 3.85E-01 | 33.77   | 94.87  | 7.22E-01 | 19.49  | 12.40 | 1.16E-01 | 32.49  | 40.80 | 4.26E-01 |
| cg08548396 | 10.99  | 5.59  | 4.93E-02 | -0.79  | 12.62 | 9.50E-01 | 14.67   | 14.22  | 3.02E-01 | 15.14  | 7.96  | 5.70E-02 | 9.03   | 14.17 | 5.24E-01 |

|            |        |       |          |        |       |          |        |        |          |        |       |          |        |       |          |
|------------|--------|-------|----------|--------|-------|----------|--------|--------|----------|--------|-------|----------|--------|-------|----------|
| cg26945748 | 23.15  | 11.78 | 4.93E-02 | 33.47  | 14.01 | 1.69E-02 | 1.91   | 48.25  | 9.68E-01 | 23.29  | 36.11 | 5.19E-01 | -24.48 | 33.07 | 4.59E-01 |
| cg00032227 | 37.91  | 19.29 | 4.93E-02 | 56.07  | 56.25 | 3.19E-01 | -71.93 | 221.21 | 7.45E-01 | 36.15  | 22.00 | 1.00E-01 | 38.45  | 59.19 | 5.16E-01 |
| cg09318763 | -8.76  | 4.45  | 4.93E-02 | -8.09  | 6.57  | 2.18E-01 | -15.14 | 10.54  | 1.51E-01 | -5.24  | 12.32 | 6.71E-01 | -7.13  | 9.28  | 4.42E-01 |
| cg14259902 | 14.63  | 7.44  | 4.93E-02 | 10.36  | 12.01 | 3.88E-01 | 18.85  | 13.74  | 1.70E-01 | 2.01   | 18.89 | 9.15E-01 | 28.79  | 18.22 | 1.14E-01 |
| cg22808175 | 33.01  | 16.79 | 4.93E-02 | 35.95  | 22.82 | 1.15E-01 | 67.23  | 58.86  | 2.53E-01 | 32.07  | 38.30 | 4.03E-01 | 10.29  | 39.06 | 7.92E-01 |
| cg03400131 | 6.43   | 3.27  | 4.93E-02 | 8.69   | 4.73  | 6.63E-02 | 2.77   | 8.70   | 7.51E-01 | -2.02  | 7.55  | 7.89E-01 | 11.81  | 7.47  | 1.14E-01 |
| cg24212377 | 10.37  | 5.27  | 4.93E-02 | 17.89  | 7.50  | 1.70E-02 | 5.86   | 11.98  | 6.25E-01 | 8.85   | 14.22 | 5.34E-01 | -4.79  | 12.63 | 7.04E-01 |
| cg13102079 | 11.57  | 5.88  | 4.93E-02 | 12.25  | 9.23  | 1.84E-01 | -3.15  | 18.04  | 8.61E-01 | 27.96  | 13.49 | 3.82E-02 | 5.39   | 10.80 | 6.18E-01 |
| cg23527621 | 13.31  | 6.77  | 4.93E-02 | 16.39  | 9.60  | 8.79E-02 | 0.07   | 15.88  | 9.96E-01 | -4.22  | 18.69 | 8.22E-01 | 30.01  | 15.53 | 5.34E-02 |
| cg26837800 | 15.98  | 8.13  | 4.93E-02 | 22.41  | 13.09 | 8.69E-02 | -10.44 | 23.18  | 6.52E-01 | 35.76  | 23.68 | 1.31E-01 | 11.80  | 13.31 | 3.75E-01 |
| cg11975813 | 8.04   | 4.09  | 4.94E-02 | 3.66   | 5.26  | 4.86E-01 | 4.82   | 7.36   | 5.12E-01 | 16.31  | 14.56 | 2.63E-01 | 22.04  | 9.61  | 2.18E-02 |
| cg10726931 | -12.72 | 6.47  | 4.94E-02 | -16.47 | 9.06  | 6.91E-02 | 1.61   | 11.75  | 8.91E-01 | -4.74  | 12.09 | 6.95E-01 | -29.61 | 11.89 | 1.28E-02 |
| cg13849749 | -15.48 | 7.88  | 4.94E-02 | -20.60 | 16.90 | 2.23E-01 | -51.06 | 38.61  | 1.86E-01 | -12.75 | 9.95  | 2.00E-01 | -7.78  | 23.24 | 7.38E-01 |
| cg04514469 | 15.13  | 7.70  | 4.94E-02 | 11.21  | 11.95 | 3.49E-01 | 23.17  | 14.83  | 1.18E-01 | 22.46  | 20.18 | 2.66E-01 | 5.69   | 18.63 | 7.60E-01 |
| cg18735114 | 14.79  | 7.53  | 4.94E-02 | -1.18  | 18.10 | 9.48E-01 | 32.40  | 32.18  | 3.14E-01 | 13.78  | 9.03  | 1.27E-01 | 47.28  | 27.10 | 8.11E-02 |
| cg07833710 | 21.50  | 10.94 | 4.94E-02 | 30.64  | 14.69 | 3.70E-02 | 49.09  | 32.67  | 1.33E-01 | -25.21 | 40.21 | 5.31E-01 | 5.77   | 20.27 | 7.76E-01 |
| cg15723222 | 6.09   | 3.10  | 4.94E-02 | 5.35   | 4.43  | 2.27E-01 | 11.35  | 6.16   | 6.57E-02 | -0.23  | 10.04 | 9.81E-01 | 3.85   | 7.67  | 6.16E-01 |
| cg26027576 | -9.27  | 4.72  | 4.94E-02 | -15.69 | 7.14  | 2.80E-02 | -4.54  | 9.49   | 6.33E-01 | -12.09 | 14.59 | 4.07E-01 | -0.15  | 10.27 | 9.89E-01 |
| cg03576554 | -7.45  | 3.79  | 4.94E-02 | -5.79  | 7.97  | 4.67E-01 | -2.41  | 12.80  | 8.51E-01 | -8.59  | 5.06  | 8.97E-02 | -8.84  | 10.68 | 4.08E-01 |
| cg02387843 | -9.76  | 4.96  | 4.94E-02 | -10.78 | 7.45  | 1.48E-01 | -3.29  | 12.00  | 7.84E-01 | -19.48 | 11.89 | 1.01E-01 | -4.78  | 10.85 | 6.59E-01 |
| cg06484274 | 14.45  | 7.35  | 4.94E-02 | 14.45  | 9.13  | 1.13E-01 | 32.89  | 28.21  | 2.44E-01 | 8.55   | 32.84 | 7.95E-01 | 10.33  | 15.23 | 4.98E-01 |
| cg08613384 | 17.52  | 8.92  | 4.94E-02 | 24.97  | 16.25 | 1.24E-01 | 1.14   | 16.54  | 9.45E-01 | 30.60  | 21.92 | 1.63E-01 | 18.98  | 18.10 | 2.94E-01 |
| cg27423920 | 27.16  | 13.82 | 4.94E-02 | 38.84  | 20.10 | 5.33E-02 | 22.10  | 29.52  | 4.54E-01 | 10.13  | 39.46 | 7.97E-01 | 14.58  | 32.16 | 6.50E-01 |
| cg01420714 | 14.45  | 7.36  | 4.94E-02 | 17.39  | 15.43 | 2.60E-01 | -0.99  | 22.80  | 9.65E-01 | 15.13  | 9.74  | 1.20E-01 | 20.05  | 23.43 | 3.92E-01 |
| cg05120715 | 37.35  | 19.01 | 4.94E-02 | 37.81  | 24.24 | 1.19E-01 | 36.41  | 67.61  | 5.90E-01 | 5.28   | 47.26 | 9.11E-01 | 71.86  | 50.05 | 1.51E-01 |
| cg08462194 | -6.51  | 3.31  | 4.94E-02 | -2.13  | 6.54  | 7.45E-01 | -7.78  | 14.86  | 6.01E-01 | -7.70  | 4.60  | 9.42E-02 | -9.03  | 7.90  | 2.53E-01 |
| cg24743778 | 16.11  | 8.20  | 4.94E-02 | -1.44  | 25.89 | 9.56E-01 | 9.00   | 98.31  | 9.27E-01 | 16.01  | 9.04  | 7.65E-02 | 43.30  | 31.06 | 1.63E-01 |
| cg12582959 | 7.87   | 4.01  | 4.94E-02 | 12.23  | 6.04  | 4.28E-02 | 11.39  | 11.23  | 3.10E-01 | 4.78   | 8.27  | 5.63E-01 | -0.43  | 9.02  | 9.62E-01 |
| cg19104032 | -7.37  | 3.75  | 4.94E-02 | -9.77  | 5.87  | 9.60E-02 | -0.44  | 8.19   | 9.57E-01 | -13.96 | 9.09  | 1.25E-01 | -4.30  | 8.17  | 5.98E-01 |
| cg02576395 | 14.28  | 7.27  | 4.94E-02 | 13.61  | 9.92  | 1.70E-01 | 49.50  | 20.96  | 1.82E-02 | 7.68   | 12.02 | 5.23E-01 | 4.56   | 16.55 | 7.83E-01 |
| cg17238319 | -11.84 | 6.02  | 4.94E-02 | -21.36 | 9.37  | 2.26E-02 | -2.52  | 12.70  | 8.43E-01 | 4.40   | 15.36 | 7.74E-01 | -14.99 | 13.21 | 2.57E-01 |
| cg09640686 | -12.31 | 6.26  | 4.94E-02 | -13.96 | 11.61 | 2.29E-01 | -12.57 | 20.86  | 5.47E-01 | -10.95 | 8.92  | 2.20E-01 | -13.61 | 17.68 | 4.41E-01 |
| cg21762601 | 22.87  | 11.64 | 4.94E-02 | 34.59  | 14.00 | 1.35E-02 | 52.59  | 34.22  | 1.24E-01 | 22.20  | 21.42 | 3.00E-01 | -9.41  | 20.71 | 6.50E-01 |
| cg07079489 | 21.08  | 10.73 | 4.94E-02 | 7.33   | 15.29 | 6.32E-01 | -6.59  | 23.65  | 7.81E-01 | 31.43  | 13.72 | 2.20E-02 | 48.90  | 21.91 | 2.56E-02 |
| cg09723590 | 44.46  | 22.63 | 4.94E-02 | 49.23  | 27.17 | 7.00E-02 | 36.56  | 131.26 | 7.81E-01 | 33.96  | 65.51 | 6.04E-01 | 32.87  | 57.07 | 5.65E-01 |

|            |        |       |          |         |       |          |         |        |          |        |       |          |        |       |          |
|------------|--------|-------|----------|---------|-------|----------|---------|--------|----------|--------|-------|----------|--------|-------|----------|
| cg01435118 | 18.17  | 9.25  | 4.94E-02 | 17.10   | 20.61 | 4.07E-01 | 30.01   | 41.70  | 4.72E-01 | 15.96  | 11.24 | 1.56E-01 | 33.86  | 34.38 | 3.25E-01 |
| cg20533982 | 13.59  | 6.92  | 4.95E-02 | 12.92   | 10.94 | 2.37E-01 | -0.41   | 14.26  | 9.77E-01 | 16.53  | 14.74 | 2.62E-01 | 33.70  | 18.19 | 6.39E-02 |
| cg02569333 | 39.91  | 20.31 | 4.95E-02 | 48.45   | 25.94 | 6.17E-02 | -44.90  | 63.60  | 4.80E-01 | 72.72  | 70.32 | 3.01E-01 | 43.23  | 45.27 | 3.40E-01 |
| cg23833617 | -42.47 | 21.62 | 4.95E-02 | -35.69  | 30.49 | 2.42E-01 | 92.11   | 90.67  | 3.10E-01 | -66.38 | 47.84 | 1.65E-01 | -68.59 | 44.46 | 1.23E-01 |
| cg02796279 | 4.95   | 2.52  | 4.95E-02 | 4.84    | 3.24  | 1.34E-01 | 5.25    | 6.39   | 4.12E-01 | 6.46   | 7.77  | 4.06E-01 | 3.90   | 6.88  | 5.71E-01 |
| cg23761616 | 17.24  | 8.78  | 4.95E-02 | 19.11   | 14.03 | 1.73E-01 | 20.91   | 27.50  | 4.47E-01 | 35.58  | 23.10 | 1.24E-01 | 6.89   | 14.58 | 6.37E-01 |
| cg24904739 | 12.73  | 6.48  | 4.95E-02 | 17.42   | 17.34 | 3.15E-01 | 42.75   | 23.72  | 7.15E-02 | 8.90   | 7.64  | 2.44E-01 | 10.64  | 25.21 | 6.73E-01 |
| cg13073773 | 10.41  | 5.30  | 4.95E-02 | 24.91   | 17.59 | 1.57E-01 | -0.22   | 43.73  | 9.96E-01 | 9.04   | 6.18  | 1.44E-01 | 9.46   | 13.27 | 4.76E-01 |
| cg02624701 | -4.59  | 2.34  | 4.95E-02 | -7.12   | 3.58  | 4.65E-02 | -0.22   | 4.94   | 9.65E-01 | -8.15  | 7.27  | 2.62E-01 | -2.69  | 4.71  | 5.69E-01 |
| cg24337151 | 25.25  | 12.85 | 4.95E-02 | 23.22   | 18.74 | 2.15E-01 | 19.85   | 42.45  | 6.40E-01 | 33.38  | 36.02 | 3.54E-01 | 26.57  | 23.05 | 2.49E-01 |
| cg23221540 | 14.80  | 7.53  | 4.95E-02 | 6.33    | 21.40 | 7.67E-01 | 8.17    | 23.13  | 7.24E-01 | 16.29  | 9.09  | 7.30E-02 | 23.56  | 26.18 | 3.68E-01 |
| cg08045757 | 13.87  | 7.06  | 4.95E-02 | 21.19   | 18.09 | 2.41E-01 | 10.26   | 21.34  | 6.31E-01 | 13.60  | 8.66  | 1.16E-01 | 6.55   | 25.84 | 8.00E-01 |
| cg13845656 | 25.92  | 13.19 | 4.95E-02 | 31.05   | 39.45 | 4.31E-01 | -149.82 | 149.31 | 3.16E-01 | 29.62  | 14.66 | 4.33E-02 | -5.37  | 49.79 | 9.14E-01 |
| cg22644194 | 23.06  | 11.74 | 4.95E-02 | 31.67   | 14.44 | 2.83E-02 | 13.79   | 45.22  | 7.60E-01 | -11.65 | 56.81 | 8.37E-01 | 7.42   | 24.53 | 7.62E-01 |
| cg10470524 | 51.52  | 26.23 | 4.95E-02 | 19.81   | 20.77 | 3.40E-01 | 10.32   | 111.45 | 9.26E-01 | 168.18 | 68.36 | 1.39E-02 | 59.98  | 30.18 | 4.69E-02 |
| cg22138278 | -29.89 | 15.22 | 4.95E-02 | -36.42  | 20.58 | 7.68E-02 | -45.09  | 39.04  | 2.48E-01 | 33.77  | 63.12 | 5.93E-01 | -20.93 | 30.85 | 4.97E-01 |
| cg09456094 | -36.90 | 18.79 | 4.95E-02 | -79.69  | 43.37 | 6.61E-02 | -29.00  | 233.30 | 9.01E-01 | -22.73 | 21.78 | 2.97E-01 | -78.32 | 75.52 | 3.00E-01 |
| cg26829310 | -18.44 | 9.39  | 4.95E-02 | -4.05   | 6.76  | 5.49E-01 | -37.20  | 16.57  | 2.48E-02 | -58.71 | 31.95 | 6.61E-02 | -16.11 | 11.32 | 1.55E-01 |
| cg16792842 | 18.14  | 9.23  | 4.95E-02 | 29.62   | 12.20 | 1.52E-02 | 3.26    | 26.05  | 9.01E-01 | 27.57  | 35.03 | 4.31E-01 | -4.98  | 19.17 | 7.95E-01 |
| cg02005847 | -66.84 | 34.03 | 4.95E-02 | -106.33 | 51.21 | 3.79E-02 | 115.30  | 241.43 | 6.33E-01 | -74.97 | 61.36 | 2.22E-01 | 3.85   | 70.82 | 9.57E-01 |
| cg07676093 | -12.04 | 6.13  | 4.95E-02 | -20.79  | 16.39 | 2.05E-01 | -21.02  | 19.70  | 2.86E-01 | -9.40  | 7.33  | 2.00E-01 | -8.23  | 24.35 | 7.35E-01 |
| cg13287553 | -13.48 | 6.86  | 4.95E-02 | -16.42  | 9.31  | 7.77E-02 | 3.85    | 17.39  | 8.25E-01 | 17.14  | 33.32 | 6.07E-01 | -22.76 | 13.50 | 9.19E-02 |
| cg10722444 | -7.67  | 3.91  | 4.95E-02 | 0.57    | 6.72  | 9.33E-01 | -10.95  | 8.88   | 2.18E-01 | -15.97 | 7.56  | 3.46E-02 | -7.35  | 8.71  | 3.99E-01 |
| cg15487498 | 15.85  | 8.07  | 4.95E-02 | 27.05   | 18.99 | 1.54E-01 | 62.77   | 41.61  | 1.31E-01 | 9.12   | 9.61  | 3.42E-01 | 28.50  | 29.27 | 3.30E-01 |
| cg25422422 | 8.19   | 4.17  | 4.95E-02 | 12.42   | 6.57  | 5.89E-02 | 20.75   | 8.55   | 1.52E-02 | 4.74   | 4.36  | 2.78E-01 | -2.31  | 8.28  | 7.80E-01 |
| cg08454760 | 33.66  | 17.14 | 4.95E-02 | 14.04   | 24.39 | 5.65E-01 | 47.32   | 39.28  | 2.28E-01 | 52.54  | 56.46 | 3.52E-01 | 57.54  | 36.23 | 1.12E-01 |
| cg00884606 | 17.12  | 8.72  | 4.95E-02 | 34.68   | 19.22 | 7.12E-02 | 2.01    | 20.44  | 9.22E-01 | 20.84  | 13.01 | 1.09E-01 | 1.65   | 21.52 | 9.39E-01 |
| cg12955084 | 8.96   | 4.56  | 4.95E-02 | 9.01    | 5.44  | 9.76E-02 | 20.70   | 8.28   | 1.24E-02 | 6.55   | 10.07 | 5.15E-01 | -4.60  | 9.98  | 6.44E-01 |
| cg11947509 | 14.34  | 7.30  | 4.95E-02 | 18.87   | 23.71 | 4.26E-01 | 68.19   | 92.23  | 4.60E-01 | 14.44  | 8.15  | 7.66E-02 | 5.61   | 23.47 | 8.11E-01 |
| cg17598785 | -9.15  | 4.66  | 4.95E-02 | -15.15  | 8.93  | 8.98E-02 | 0.95    | 11.89  | 9.37E-01 | -7.35  | 7.02  | 2.95E-01 | -14.52 | 12.79 | 2.56E-01 |
| cg13911785 | -6.73  | 3.43  | 4.95E-02 | -17.01  | 7.87  | 3.07E-02 | -8.41   | 10.75  | 4.34E-01 | -3.59  | 4.43  | 4.18E-01 | -4.58  | 10.32 | 6.57E-01 |
| cg11324010 | -5.25  | 2.67  | 4.95E-02 | -3.77   | 3.89  | 3.32E-01 | -8.76   | 5.58   | 1.17E-01 | -8.76  | 10.09 | 3.85E-01 | -3.70  | 5.60  | 5.09E-01 |
| cg02639011 | -17.40 | 8.86  | 4.95E-02 | -13.54  | 18.77 | 4.71E-01 | 10.73   | 38.47  | 7.80E-01 | -18.05 | 11.29 | 1.10E-01 | -35.31 | 26.83 | 1.88E-01 |
| cg05328461 | -19.18 | 9.77  | 4.95E-02 | -19.09  | 22.77 | 4.02E-01 | -17.97  | 31.70  | 5.71E-01 | -26.04 | 9.65  | 6.95E-03 | 39.40  | 34.75 | 2.57E-01 |
| cg23690893 | 6.08   | 3.10  | 4.95E-02 | 5.80    | 4.10  | 1.58E-01 | 8.00    | 6.61   | 2.26E-01 | 3.48   | 11.93 | 7.70E-01 | 5.52   | 8.22  | 5.02E-01 |



|            |        |       |          |        |       |          |         |        |          |        |       |          |        |       |          |
|------------|--------|-------|----------|--------|-------|----------|---------|--------|----------|--------|-------|----------|--------|-------|----------|
| cg21727223 | 6.77   | 3.45  | 4.96E-02 | 6.91   | 4.61  | 1.34E-01 | 8.67    | 7.48   | 2.46E-01 | 6.58   | 12.73 | 6.05E-01 | 3.74   | 8.76  | 6.69E-01 |
| cg10700964 | -39.95 | 20.34 | 4.96E-02 | 9.25   | 56.12 | 8.69E-01 | -144.77 | 246.19 | 5.57E-01 | -48.48 | 22.76 | 3.32E-02 | -23.01 | 81.26 | 7.77E-01 |
| cg03906014 | -29.48 | 15.01 | 4.96E-02 | -23.92 | 22.11 | 2.79E-01 | -23.27  | 41.76  | 5.77E-01 | -54.27 | 35.57 | 1.27E-01 | -24.97 | 31.20 | 4.24E-01 |
| cg16248277 | 12.40  | 6.31  | 4.96E-02 | 19.56  | 11.71 | 9.49E-02 | 2.50    | 16.42  | 8.79E-01 | 8.28   | 9.95  | 4.05E-01 | 18.98  | 15.87 | 2.32E-01 |
| cg24264382 | -11.90 | 6.06  | 4.96E-02 | -16.44 | 10.10 | 1.03E-01 | 4.03    | 13.53  | 7.66E-01 | -17.44 | 14.59 | 2.32E-01 | -14.15 | 11.73 | 2.28E-01 |
| cg13452215 | 18.53  | 9.44  | 4.96E-02 | 9.69   | 17.74 | 5.85E-01 | 29.77   | 17.35  | 8.61E-02 | -4.37  | 19.68 | 8.24E-01 | 39.41  | 20.45 | 5.40E-02 |
| cg18053607 | 9.96   | 5.07  | 4.96E-02 | 2.16   | 7.47  | 7.73E-01 | 21.04   | 10.20  | 3.92E-02 | 16.58  | 15.94 | 2.98E-01 | 10.90  | 11.58 | 3.47E-01 |
| cg22043720 | 26.47  | 13.48 | 4.96E-02 | 7.85   | 42.47 | 8.53E-01 | 104.72  | 184.80 | 5.71E-01 | 30.79  | 14.85 | 3.82E-02 | -3.34  | 50.81 | 9.48E-01 |
| cg21249376 | -31.76 | 16.17 | 4.96E-02 | -18.21 | 43.22 | 6.74E-01 | -17.20  | 212.10 | 9.35E-01 | -34.48 | 20.45 | 9.17E-02 | -32.99 | 33.85 | 3.30E-01 |
| cg05807885 | 14.10  | 7.18  | 4.96E-02 | 8.26   | 12.06 | 4.93E-01 | 17.17   | 21.33  | 4.21E-01 | 15.77  | 17.76 | 3.74E-01 | 18.02  | 11.82 | 1.27E-01 |
| cg03773862 | 8.32   | 4.24  | 4.96E-02 | 2.45   | 9.82  | 8.03E-01 | -6.97   | 12.94  | 5.90E-01 | 12.03  | 5.46  | 2.77E-02 | 13.12  | 13.10 | 3.17E-01 |
| cg07456180 | 11.16  | 5.68  | 4.96E-02 | 8.32   | 7.18  | 2.47E-01 | 4.23    | 22.53  | 8.51E-01 | 19.58  | 11.10 | 7.78E-02 | 11.55  | 26.17 | 6.59E-01 |
| cg12257384 | -13.11 | 6.68  | 4.96E-02 | 6.79   | 17.36 | 6.96E-01 | 16.52   | 64.84  | 7.99E-01 | -14.10 | 8.20  | 8.56E-02 | -27.68 | 15.80 | 7.98E-02 |
| cg09142578 | 7.77   | 3.96  | 4.96E-02 | 7.88   | 6.96  | 2.57E-01 | 13.49   | 9.01   | 1.34E-01 | 7.44   | 8.00  | 3.53E-01 | 3.34   | 8.11  | 6.80E-01 |
| cg09273483 | -7.86  | 4.00  | 4.96E-02 | -13.34 | 7.72  | 8.43E-02 | 5.90    | 12.47  | 6.36E-01 | -9.79  | 5.70  | 8.60E-02 | -0.46  | 10.87 | 9.66E-01 |
| cg18419175 | 12.17  | 6.20  | 4.96E-02 | 15.53  | 8.96  | 8.29E-02 | 17.36   | 11.91  | 1.45E-01 | -14.57 | 21.64 | 5.01E-01 | 7.28   | 15.08 | 6.29E-01 |
| cg05084700 | -12.01 | 6.12  | 4.96E-02 | -13.87 | 9.48  | 1.43E-01 | -11.05  | 10.66  | 3.00E-01 | -15.93 | 16.82 | 3.44E-01 | -4.02  | 17.49 | 8.18E-01 |
| cg00031663 | 44.08  | 22.45 | 4.96E-02 | -62.19 | 66.94 | 3.53E-01 | -51.56  | 283.09 | 8.55E-01 | 59.13  | 23.91 | 1.34E-02 | 46.40  | 86.65 | 5.92E-01 |
| cg04708398 | -33.95 | 17.29 | 4.96E-02 | -95.37 | 49.88 | 5.59E-02 | -46.59  | 170.53 | 7.85E-01 | -21.02 | 19.61 | 2.84E-01 | -61.45 | 56.91 | 2.80E-01 |
| cg06819546 | -5.99  | 3.05  | 4.96E-02 | -8.91  | 5.38  | 9.79E-02 | -3.03   | 5.80   | 6.01E-01 | -9.20  | 6.63  | 1.65E-01 | -1.78  | 7.02  | 8.00E-01 |
| cg15330508 | 19.78  | 10.08 | 4.96E-02 | 4.72   | 35.22 | 8.93E-01 | 6.35    | 129.15 | 9.61E-01 | 21.69  | 10.88 | 4.61E-02 | 13.77  | 43.39 | 7.51E-01 |
| cg06440348 | 6.93   | 3.53  | 4.96E-02 | 1.58   | 5.52  | 7.75E-01 | 2.17    | 5.66   | 7.02E-01 | 12.93  | 4.99  | 9.50E-03 | 17.68  | 11.79 | 1.34E-01 |
| cg13261713 | 20.41  | 10.40 | 4.96E-02 | 2.12   | 32.60 | 9.48E-01 | -33.27  | 104.60 | 7.50E-01 | 22.23  | 11.65 | 5.64E-02 | 30.63  | 34.25 | 3.71E-01 |
| cg25590438 | 13.43  | 6.84  | 4.96E-02 | 1.22   | 20.61 | 9.53E-01 | 0.04    | 27.35  | 9.99E-01 | 15.96  | 7.76  | 3.98E-02 | 17.66  | 30.24 | 5.59E-01 |
| cg21206820 | -17.77 | 9.05  | 4.96E-02 | -25.87 | 15.19 | 8.84E-02 | -34.59  | 22.45  | 1.23E-01 | 1.68   | 16.70 | 9.20E-01 | -18.28 | 20.83 | 3.80E-01 |
| cg27319677 | 18.49  | 9.42  | 4.96E-02 | -11.95 | 25.13 | 6.34E-01 | -65.63  | 91.44  | 4.73E-01 | 24.27  | 10.63 | 2.24E-02 | 28.42  | 37.41 | 4.48E-01 |
| cg07546508 | -13.47 | 6.86  | 4.96E-02 | -19.55 | 10.26 | 5.68E-02 | -10.39  | 14.89  | 4.85E-01 | -3.38  | 16.41 | 8.37E-01 | -11.65 | 16.81 | 4.88E-01 |
| cg24200083 | 9.19   | 4.68  | 4.96E-02 | 5.16   | 7.85  | 5.11E-01 | 5.36    | 11.19  | 6.32E-01 | 20.27  | 9.99  | 4.25E-02 | 7.89   | 9.37  | 4.00E-01 |
| cg01001049 | 13.28  | 6.76  | 4.96E-02 | 28.88  | 8.64  | 8.37E-04 | 8.93    | 12.56  | 4.77E-01 | 4.55   | 8.05  | 5.72E-01 | 4.78   | 16.74 | 7.75E-01 |
| cg04647948 | 16.73  | 8.52  | 4.96E-02 | 14.90  | 17.60 | 3.97E-01 | -63.46  | 49.20  | 1.97E-01 | 19.94  | 10.66 | 6.14E-02 | 24.78  | 27.38 | 3.66E-01 |
| cg00092383 | 52.93  | 26.96 | 4.96E-02 | 21.30  | 34.57 | 5.38E-01 | 56.00   | 155.91 | 7.19E-01 | 129.43 | 78.68 | 1.00E-01 | 94.50  | 54.53 | 8.31E-02 |
| cg08035323 | -11.52 | 5.87  | 4.96E-02 | -0.28  | 5.07  | 9.56E-01 | -19.00  | 9.23   | 3.96E-02 | -22.89 | 8.58  | 7.68E-03 | -9.66  | 9.30  | 2.99E-01 |
| cg15236460 | -45.83 | 23.35 | 4.96E-02 | -81.75 | 59.89 | 1.72E-01 | -287.18 | 191.02 | 1.33E-01 | -35.25 | 27.39 | 1.98E-01 | -32.94 | 71.53 | 6.45E-01 |
| cg11587658 | -20.67 | 10.53 | 4.96E-02 | -6.71  | 26.75 | 8.02E-01 | 20.18   | 99.17  | 8.39E-01 | -28.19 | 12.06 | 1.94E-02 | 22.35  | 39.15 | 5.68E-01 |
| cg10203869 | 8.34   | 4.25  | 4.96E-02 | 12.96  | 6.36  | 4.15E-02 | 9.35    | 8.40   | 2.65E-01 | 2.39   | 12.59 | 8.49E-01 | -0.64  | 9.93  | 9.49E-01 |

|            |        |       |          |        |       |          |        |        |          |        |       |          |        |       |          |
|------------|--------|-------|----------|--------|-------|----------|--------|--------|----------|--------|-------|----------|--------|-------|----------|
| cg10755899 | 6.77   | 3.45  | 4.96E-02 | 7.21   | 4.99  | 1.48E-01 | 8.82   | 7.58   | 2.44E-01 | -1.81  | 10.58 | 8.64E-01 | 8.08   | 7.54  | 2.84E-01 |
| cg05915142 | 20.18  | 10.28 | 4.96E-02 | 24.25  | 16.96 | 1.53E-01 | 48.14  | 23.66  | 4.19E-02 | 5.00   | 7.65  | 5.14E-01 | 38.66  | 26.03 | 1.37E-01 |
| cg10096215 | 8.41   | 4.28  | 4.97E-02 | 7.88   | 5.24  | 1.32E-01 | 19.53  | 16.78  | 2.45E-01 | -14.96 | 19.83 | 4.51E-01 | 11.68  | 9.15  | 2.02E-01 |
| cg07377936 | 8.49   | 4.33  | 4.97E-02 | 7.64   | 8.69  | 3.79E-01 | 21.46  | 11.33  | 5.83E-02 | 7.41   | 6.12  | 2.26E-01 | -2.16  | 13.22 | 8.70E-01 |
| cg24984698 | -14.71 | 7.49  | 4.97E-02 | -13.87 | 16.59 | 4.03E-01 | -27.02 | 18.85  | 1.52E-01 | -4.97  | 10.66 | 6.41E-01 | -35.73 | 19.72 | 7.00E-02 |
| cg00148513 | -10.97 | 5.59  | 4.97E-02 | -3.19  | 17.06 | 8.52E-01 | -1.97  | 21.64  | 9.27E-01 | -14.22 | 6.40  | 2.62E-02 | 5.94   | 22.48 | 7.91E-01 |
| cg10329874 | 12.69  | 6.47  | 4.97E-02 | 8.78   | 9.66  | 3.63E-01 | 22.62  | 12.23  | 6.43E-02 | 8.03   | 20.45 | 6.95E-01 | 9.45   | 15.56 | 5.44E-01 |
| cg13324546 | 18.12  | 9.23  | 4.97E-02 | 57.59  | 34.34 | 9.35E-02 | 47.60  | 74.39  | 5.22E-01 | 20.21  | 11.20 | 7.10E-02 | -2.25  | 19.16 | 9.07E-01 |
| cg04111436 | -12.21 | 6.22  | 4.97E-02 | -21.95 | 11.06 | 4.71E-02 | -5.60  | 14.18  | 6.93E-01 | -13.44 | 10.15 | 1.86E-01 | 7.41   | 18.29 | 6.85E-01 |
| cg15996282 | -33.09 | 16.86 | 4.97E-02 | -42.08 | 29.29 | 1.51E-01 | 74.62  | 148.49 | 6.15E-01 | -23.10 | 25.93 | 3.73E-01 | -44.41 | 34.94 | 2.04E-01 |
| cg11712936 | 10.56  | 5.38  | 4.97E-02 | 14.76  | 7.73  | 5.63E-02 | 15.25  | 14.77  | 3.02E-01 | 11.08  | 15.24 | 4.68E-01 | 0.04   | 10.59 | 9.97E-01 |
| cg09642378 | -8.44  | 4.30  | 4.97E-02 | -17.99 | 9.76  | 6.54E-02 | 9.53   | 14.61  | 5.14E-01 | -6.45  | 4.96  | 1.94E-01 | -17.93 | 13.03 | 1.69E-01 |
| cg22065604 | -7.98  | 4.06  | 4.97E-02 | -7.54  | 7.23  | 2.97E-01 | 3.41   | 9.81   | 7.28E-01 | -15.14 | 6.22  | 1.50E-02 | -0.55  | 11.78 | 9.63E-01 |
| cg05228564 | -9.67  | 4.93  | 4.97E-02 | -13.90 | 7.90  | 7.84E-02 | 4.43   | 24.32  | 8.55E-01 | -8.24  | 6.78  | 2.24E-01 | -2.19  | 24.09 | 9.28E-01 |
| cg14855519 | 11.17  | 5.69  | 4.97E-02 | 15.53  | 11.69 | 1.84E-01 | 16.38  | 12.55  | 1.92E-01 | 11.52  | 10.75 | 2.84E-01 | 3.22   | 10.81 | 7.66E-01 |
| cg14777509 | 31.32  | 15.96 | 4.97E-02 | 16.16  | 21.93 | 4.61E-01 | 23.02  | 112.69 | 8.38E-01 | 82.86  | 36.77 | 2.42E-02 | 25.55  | 31.17 | 4.12E-01 |
| cg12473797 | 9.87   | 5.03  | 4.97E-02 | 6.39   | 7.63  | 4.02E-01 | 15.55  | 10.01  | 1.20E-01 | 18.48  | 16.77 | 2.71E-01 | 6.75   | 10.65 | 5.26E-01 |
| cg00432872 | 22.09  | 11.26 | 4.97E-02 | 39.59  | 20.45 | 5.29E-02 | 17.30  | 49.26  | 7.25E-01 | 8.67   | 16.58 | 6.01E-01 | 28.29  | 26.25 | 2.81E-01 |
| cg07908654 | 10.89  | 5.55  | 4.97E-02 | 10.44  | 15.65 | 5.05E-01 | 8.70   | 21.91  | 6.91E-01 | 14.67  | 6.51  | 2.42E-02 | -19.64 | 19.19 | 3.06E-01 |
| cg08047457 | -47.15 | 24.02 | 4.97E-02 | -63.80 | 32.30 | 4.83E-02 | -10.18 | 83.23  | 9.03E-01 | -9.96  | 67.65 | 8.83E-01 | -41.10 | 49.30 | 4.04E-01 |
| cg20569955 | -36.23 | 18.46 | 4.97E-02 | -35.19 | 23.97 | 1.42E-01 | -48.41 | 52.21  | 3.54E-01 | -38.00 | 51.38 | 4.60E-01 | -28.82 | 47.21 | 5.41E-01 |
| cg20711695 | -13.29 | 6.77  | 4.97E-02 | -16.12 | 19.35 | 4.05E-01 | 11.19  | 30.87  | 7.17E-01 | -13.21 | 7.80  | 9.05E-02 | -25.02 | 24.52 | 3.07E-01 |
| cg14254668 | 33.62  | 17.13 | 4.97E-02 | 33.52  | 51.33 | 5.14E-01 | 16.38  | 220.78 | 9.41E-01 | 39.80  | 18.96 | 3.58E-02 | -41.00 | 66.60 | 5.38E-01 |
| cg18524114 | -5.99  | 3.05  | 4.97E-02 | -6.24  | 5.98  | 2.97E-01 | -0.85  | 7.99   | 9.15E-01 | -9.06  | 4.61  | 4.94E-02 | -1.73  | 7.72  | 8.22E-01 |
| cg10095226 | 17.26  | 8.80  | 4.97E-02 | 0.31   | 36.02 | 9.93E-01 | 63.19  | 99.92  | 5.27E-01 | 19.64  | 9.48  | 3.84E-02 | -1.98  | 32.77 | 9.52E-01 |
| cg16608656 | -9.38  | 4.78  | 4.97E-02 | -6.12  | 7.02  | 3.84E-01 | -12.08 | 10.17  | 2.35E-01 | -18.46 | 12.20 | 1.30E-01 | -6.42  | 11.82 | 5.87E-01 |
| cg03851515 | -17.66 | 9.00  | 4.97E-02 | -8.02  | 19.31 | 6.78E-01 | -10.75 | 29.60  | 7.17E-01 | -13.68 | 8.08  | 9.06E-02 | -64.21 | 26.65 | 1.60E-02 |
| cg03945322 | 32.35  | 16.48 | 4.97E-02 | 39.85  | 36.55 | 2.76E-01 | -26.25 | 108.84 | 8.09E-01 | 38.73  | 19.97 | 5.25E-02 | -16.61 | 54.23 | 7.59E-01 |
| cg13895441 | -11.17 | 5.69  | 4.97E-02 | -13.50 | 11.52 | 2.41E-01 | -7.83  | 18.55  | 6.73E-01 | -10.96 | 7.71  | 1.55E-01 | -9.95  | 16.58 | 5.48E-01 |
| cg20668450 | 17.50  | 8.92  | 4.97E-02 | 24.74  | 16.39 | 1.31E-01 | 18.53  | 17.29  | 2.84E-01 | 1.68   | 15.80 | 9.15E-01 | 39.43  | 25.79 | 1.26E-01 |
| cg03599575 | -11.44 | 5.83  | 4.97E-02 | -13.49 | 10.30 | 1.90E-01 | -31.76 | 14.45  | 2.79E-02 | -1.88  | 9.95  | 8.51E-01 | -7.60  | 13.71 | 5.80E-01 |
| cg18967021 | -11.17 | 5.69  | 4.97E-02 | -15.29 | 8.70  | 7.88E-02 | -11.85 | 14.48  | 4.13E-01 | -9.61  | 16.31 | 5.56E-01 | -5.49  | 10.47 | 6.00E-01 |
| cg23658362 | -12.63 | 6.44  | 4.97E-02 | -29.19 | 17.33 | 9.21E-02 | -15.36 | 26.42  | 5.61E-01 | -8.20  | 7.56  | 2.78E-01 | -22.23 | 22.91 | 3.32E-01 |
| cg07295248 | 27.22  | 13.87 | 4.97E-02 | 28.61  | 17.46 | 1.01E-01 | 41.32  | 75.41  | 5.84E-01 | -44.04 | 72.89 | 5.46E-01 | 31.34  | 25.40 | 2.17E-01 |
| cg00883212 | 6.08   | 3.10  | 4.97E-02 | 6.75   | 3.86  | 8.06E-02 | 15.89  | 7.07   | 2.47E-02 | 2.12   | 6.54  | 7.46E-01 | -1.94  | 7.57  | 7.97E-01 |

|            |        |       |          |        |       |          |         |        |          |        |       |          |        |       |          |
|------------|--------|-------|----------|--------|-------|----------|---------|--------|----------|--------|-------|----------|--------|-------|----------|
| cg22318806 | -6.10  | 3.11  | 4.97E-02 | -5.80  | 3.68  | 1.15E-01 | -11.85  | 7.56   | 1.17E-01 | -8.77  | 16.13 | 5.87E-01 | 4.65   | 11.02 | 6.73E-01 |
| cg11733272 | 7.15   | 3.64  | 4.97E-02 | -0.45  | 6.03  | 9.41E-01 | 15.22   | 6.53   | 1.97E-02 | 7.10   | 8.58  | 4.08E-01 | 8.34   | 8.25  | 3.12E-01 |
| cg08770757 | -8.83  | 4.50  | 4.97E-02 | -16.81 | 10.09 | 9.59E-02 | 2.23    | 19.44  | 9.09E-01 | -8.99  | 5.67  | 1.13E-01 | 0.42   | 13.09 | 9.74E-01 |
| cg04838064 | -21.02 | 10.71 | 4.97E-02 | 8.39   | 33.46 | 8.02E-01 | -33.55  | 85.76  | 6.96E-01 | -25.49 | 11.96 | 3.31E-02 | -11.40 | 37.88 | 7.63E-01 |
| cg09244872 | -8.43  | 4.30  | 4.97E-02 | -12.70 | 6.05  | 3.57E-02 | -5.61   | 11.19  | 6.16E-01 | -17.79 | 12.92 | 1.69E-01 | 3.25   | 8.82  | 7.12E-01 |
| cg02251243 | 7.93   | 4.04  | 4.97E-02 | 12.40  | 5.80  | 3.25E-02 | 13.95   | 10.39  | 1.79E-01 | 3.06   | 11.06 | 7.82E-01 | -2.64  | 8.42  | 7.54E-01 |
| cg18803257 | 6.83   | 3.48  | 4.97E-02 | 4.40   | 6.75  | 5.15E-01 | -0.27   | 12.69  | 9.83E-01 | 8.86   | 4.74  | 6.16E-02 | 7.55   | 10.08 | 4.54E-01 |
| cg09544149 | -20.53 | 10.46 | 4.97E-02 | -30.12 | 15.07 | 4.57E-02 | 26.31   | 27.49  | 3.39E-01 | -21.19 | 18.16 | 2.43E-01 | -31.33 | 19.87 | 1.15E-01 |
| cg11028316 | 31.16  | 15.88 | 4.98E-02 | 63.31  | 47.09 | 1.79E-01 | 157.17  | 199.13 | 4.30E-01 | 21.53  | 17.50 | 2.19E-01 | 93.05  | 67.03 | 1.65E-01 |
| cg10221068 | 17.95  | 9.15  | 4.98E-02 | 19.56  | 16.49 | 2.35E-01 | 34.57   | 18.71  | 6.46E-02 | 0.78   | 15.94 | 9.61E-01 | 27.52  | 26.01 | 2.90E-01 |
| cg13405678 | -11.35 | 5.79  | 4.98E-02 | -9.78  | 8.80  | 2.66E-01 | -8.19   | 13.25  | 5.37E-01 | -3.81  | 14.64 | 7.95E-01 | -22.52 | 12.32 | 6.76E-02 |
| cg03967448 | 14.93  | 7.61  | 4.98E-02 | 36.59  | 19.01 | 5.42E-02 | 0.78    | 25.39  | 9.76E-01 | 13.07  | 9.14  | 1.53E-01 | -1.12  | 31.94 | 9.72E-01 |
| cg25981998 | 6.37   | 3.25  | 4.98E-02 | 5.88   | 4.75  | 2.16E-01 | 9.47    | 6.42   | 1.40E-01 | 5.83   | 8.45  | 4.90E-01 | 2.63   | 9.06  | 7.71E-01 |
| cg01351822 | -6.27  | 3.19  | 4.98E-02 | -9.82  | 6.48  | 1.29E-01 | -3.85   | 7.56   | 6.11E-01 | -5.36  | 5.25  | 3.07E-01 | -5.79  | 7.00  | 4.08E-01 |
| cg04382374 | -18.07 | 9.21  | 4.98E-02 | -21.78 | 16.64 | 1.91E-01 | -0.95   | 21.14  | 9.64E-01 | -25.07 | 15.83 | 1.13E-01 | -16.52 | 22.67 | 4.66E-01 |
| cg17517296 | 7.16   | 3.65  | 4.98E-02 | 6.11   | 4.51  | 1.75E-01 | 11.91   | 10.36  | 2.50E-01 | 7.88   | 11.02 | 4.74E-01 | 7.35   | 11.00 | 5.04E-01 |
| cg07047068 | 7.54   | 3.85  | 4.98E-02 | 8.96   | 5.25  | 8.78E-02 | 17.12   | 10.03  | 8.80E-02 | -1.88  | 9.80  | 8.48E-01 | 3.14   | 9.54  | 7.42E-01 |
| cg20759222 | -27.53 | 14.03 | 4.98E-02 | -24.49 | 18.47 | 1.85E-01 | -80.88  | 167.18 | 6.29E-01 | -47.35 | 24.41 | 5.24E-02 | 33.10  | 48.07 | 4.91E-01 |
| cg04277097 | 9.96   | 5.08  | 4.98E-02 | 8.63   | 7.14  | 2.27E-01 | 14.46   | 10.19  | 1.56E-01 | 10.94  | 16.42 | 5.05E-01 | 6.39   | 13.04 | 6.24E-01 |
| cg22798121 | -14.42 | 7.35  | 4.98E-02 | -20.92 | 8.23  | 1.10E-02 | -11.91  | 10.59  | 2.61E-01 | 0.70   | 6.55  | 9.15E-01 | -33.22 | 12.60 | 8.38E-03 |
| cg18109485 | 5.25   | 2.68  | 4.98E-02 | 7.50   | 3.87  | 5.26E-02 | 2.20    | 5.50   | 6.89E-01 | 11.33  | 9.24  | 2.20E-01 | 0.94   | 5.99  | 8.75E-01 |
| cg04239078 | -9.31  | 4.75  | 4.98E-02 | -19.40 | 7.81  | 1.30E-02 | -4.22   | 12.30  | 7.32E-01 | -2.17  | 4.89  | 6.58E-01 | -15.82 | 9.74  | 1.04E-01 |
| cg04309437 | -14.32 | 7.30  | 4.98E-02 | -11.56 | 14.85 | 4.37E-01 | -3.74   | 34.56  | 9.14E-01 | -16.73 | 9.10  | 6.60E-02 | -8.47  | 27.39 | 7.57E-01 |
| cg18368487 | 24.19  | 12.33 | 4.98E-02 | 40.01  | 21.18 | 5.89E-02 | 1.81    | 38.12  | 9.62E-01 | 20.76  | 30.67 | 4.98E-01 | 17.93  | 19.63 | 3.61E-01 |
| cg14678654 | -9.16  | 4.67  | 4.98E-02 | -7.94  | 7.19  | 2.70E-01 | -6.39   | 9.56   | 5.04E-01 | -1.62  | 18.50 | 9.30E-01 | -15.18 | 8.89  | 8.79E-02 |
| cg24880665 | 4.54   | 2.32  | 4.98E-02 | 4.13   | 3.22  | 2.00E-01 | 5.95    | 5.44   | 2.74E-01 | 4.90   | 5.20  | 3.46E-01 | 3.48   | 7.23  | 6.30E-01 |
| cg15358103 | -18.36 | 9.36  | 4.98E-02 | -0.08  | 33.83 | 9.98E-01 | -26.17  | 110.74 | 8.13E-01 | -19.00 | 10.07 | 5.92E-02 | -33.59 | 40.95 | 4.12E-01 |
| cg07777344 | 15.52  | 7.91  | 4.98E-02 | 18.31  | 14.39 | 2.03E-01 | 2.87    | 23.46  | 9.03E-01 | 16.61  | 11.09 | 1.34E-01 | 16.07  | 28.92 | 5.78E-01 |
| cg22045288 | 7.84   | 4.00  | 4.98E-02 | 9.88   | 5.20  | 5.74E-02 | 16.09   | 10.85  | 1.38E-01 | -2.93  | 10.20 | 7.74E-01 | 2.21   | 11.57 | 8.48E-01 |
| cg25910506 | -12.96 | 6.61  | 4.98E-02 | -7.39  | 21.37 | 7.29E-01 | 6.32    | 103.34 | 9.51E-01 | -12.35 | 7.11  | 8.24E-02 | -43.10 | 34.08 | 2.06E-01 |
| cg11620689 | 11.00  | 5.61  | 4.98E-02 | 9.72   | 10.03 | 3.32E-01 | -1.53   | 11.38  | 8.93E-01 | 20.39  | 9.60  | 3.37E-02 | 13.34  | 17.42 | 4.44E-01 |
| cg04575144 | 22.66  | 11.55 | 4.98E-02 | 2.44   | 29.72 | 9.35E-01 | -1.79   | 73.21  | 9.80E-01 | 23.31  | 13.77 | 9.04E-02 | 49.28  | 33.31 | 1.39E-01 |
| cg10462803 | 12.15  | 6.19  | 4.98E-02 | 24.00  | 13.26 | 7.03E-02 | 16.81   | 16.13  | 2.97E-01 | 9.51   | 8.49  | 2.63E-01 | -6.04  | 19.33 | 7.55E-01 |
| cg10338639 | 43.57  | 22.21 | 4.98E-02 | 38.22  | 56.36 | 4.98E-01 | -306.35 | 222.92 | 1.69E-01 | 53.00  | 25.51 | 3.77E-02 | 6.31   | 80.30 | 9.37E-01 |
| cg26115470 | -30.34 | 15.47 | 4.98E-02 | -56.23 | 34.10 | 9.92E-02 | -52.49  | 92.28  | 5.69E-01 | -28.70 | 18.62 | 1.23E-01 | 33.14  | 56.18 | 5.55E-01 |

|            |        |       |          |        |       |          |         |        |          |        |       |          |        |       |          |
|------------|--------|-------|----------|--------|-------|----------|---------|--------|----------|--------|-------|----------|--------|-------|----------|
| cg13591091 | 20.32  | 10.36 | 4.98E-02 | 39.06  | 22.37 | 8.08E-02 | 20.83   | 19.89  | 2.95E-01 | 4.81   | 16.74 | 7.74E-01 | 33.89  | 28.58 | 2.36E-01 |
| cg13879937 | -7.64  | 3.90  | 4.98E-02 | -9.95  | 6.26  | 1.12E-01 | -4.11   | 9.40   | 6.62E-01 | -17.16 | 8.57  | 4.51E-02 | 2.04   | 8.07  | 8.01E-01 |
| cg06605454 | 5.68   | 2.90  | 4.98E-02 | 6.57   | 4.58  | 1.51E-01 | 11.41   | 5.36   | 3.33E-02 | 5.59   | 5.42  | 3.02E-01 | -4.42  | 6.69  | 5.09E-01 |
| cg17821688 | 12.72  | 6.49  | 4.98E-02 | 10.67  | 16.83 | 5.26E-01 | -12.62  | 27.55  | 6.47E-01 | 15.21  | 7.65  | 4.69E-02 | 11.71  | 23.23 | 6.14E-01 |
| cg04623103 | 28.26  | 14.41 | 4.98E-02 | 28.28  | 22.26 | 2.04E-01 | 34.84   | 42.64  | 4.14E-01 | 6.09   | 12.55 | 6.27E-01 | 64.33  | 23.01 | 5.18E-03 |
| cg25865108 | 6.23   | 3.18  | 4.98E-02 | 4.39   | 3.78  | 2.46E-01 | 12.17   | 6.46   | 5.97E-02 | 10.95  | 4.04  | 6.68E-03 | -3.60  | 6.02  | 5.50E-01 |
| cg07210335 | -23.11 | 11.78 | 4.98E-02 | -55.45 | 23.50 | 1.83E-02 | -22.28  | 77.74  | 7.74E-01 | -10.52 | 7.01  | 1.33E-01 | -36.89 | 28.99 | 2.03E-01 |
| cg01304894 | 14.31  | 7.30  | 4.98E-02 | 11.12  | 12.60 | 3.77E-01 | 17.00   | 12.26  | 1.65E-01 | 8.33   | 19.20 | 6.64E-01 | 20.23  | 17.93 | 2.59E-01 |
| cg22373079 | -30.16 | 15.38 | 4.98E-02 | -50.02 | 41.65 | 2.30E-01 | -59.94  | 105.44 | 5.70E-01 | -24.84 | 18.15 | 1.71E-01 | -34.00 | 43.61 | 4.36E-01 |
| cg07976644 | -33.82 | 17.24 | 4.98E-02 | -63.35 | 56.20 | 2.60E-01 | -217.13 | 243.87 | 3.73E-01 | -29.70 | 19.00 | 1.18E-01 | -29.87 | 61.99 | 6.30E-01 |
| cg14403068 | 14.38  | 7.33  | 4.99E-02 | -9.77  | 20.54 | 6.34E-01 | 24.48   | 30.81  | 4.27E-01 | 17.19  | 8.44  | 4.16E-02 | 20.51  | 29.58 | 4.88E-01 |
| cg17872261 | 6.12   | 3.12  | 4.99E-02 | 3.35   | 4.81  | 4.86E-01 | 13.56   | 7.14   | 5.73E-02 | 12.69  | 8.19  | 1.21E-01 | 1.14   | 6.31  | 8.57E-01 |
| cg12176709 | 8.51   | 4.34  | 4.99E-02 | 5.46   | 6.30  | 3.86E-01 | -3.13   | 10.50  | 7.66E-01 | 23.81  | 15.08 | 1.14E-01 | 14.50  | 7.27  | 4.63E-02 |
| cg00457403 | 7.58   | 3.87  | 4.99E-02 | 10.18  | 4.65  | 2.87E-02 | 11.31   | 8.74   | 1.96E-01 | 18.87  | 12.48 | 1.31E-01 | -2.14  | 6.34  | 7.35E-01 |
| cg10877241 | 6.29   | 3.21  | 4.99E-02 | 7.47   | 4.85  | 1.24E-01 | 11.97   | 7.03   | 8.87E-02 | 1.41   | 6.61  | 8.32E-01 | 1.70   | 9.29  | 8.55E-01 |
| cg07905568 | 10.28  | 5.24  | 4.99E-02 | 8.02   | 8.94  | 3.70E-01 | 13.39   | 11.01  | 2.24E-01 | 10.08  | 9.65  | 2.96E-01 | 11.26  | 14.30 | 4.31E-01 |
| cg01132064 | 21.68  | 11.06 | 4.99E-02 | 19.10  | 14.38 | 1.84E-01 | 40.75   | 28.73  | 1.56E-01 | 25.11  | 41.13 | 5.41E-01 | 13.49  | 25.43 | 5.96E-01 |
| cg08076437 | 11.21  | 5.71  | 4.99E-02 | 10.77  | 9.14  | 2.38E-01 | 20.26   | 14.94  | 1.75E-01 | 19.45  | 12.22 | 1.11E-01 | -0.91  | 11.57 | 9.37E-01 |
| cg14515453 | 15.41  | 7.86  | 4.99E-02 | 33.00  | 13.62 | 1.54E-02 | -6.41   | 24.05  | 7.90E-01 | 9.05   | 21.62 | 6.75E-01 | 9.13   | 12.00 | 4.47E-01 |
| cg11368502 | -9.86  | 5.03  | 4.99E-02 | -11.79 | 6.49  | 6.95E-02 | 4.28    | 12.59  | 7.34E-01 | -10.60 | 20.06 | 5.97E-01 | -15.75 | 11.90 | 1.86E-01 |
| cg26471497 | 6.90   | 3.52  | 4.99E-02 | 5.78   | 5.28  | 2.74E-01 | 15.99   | 8.31   | 5.43E-02 | 9.98   | 8.39  | 2.34E-01 | -1.50  | 7.89  | 8.49E-01 |
| cg23148651 | -10.25 | 5.23  | 4.99E-02 | -6.75  | 13.94 | 6.28E-01 | 16.67   | 31.63  | 5.98E-01 | -11.34 | 5.97  | 5.76E-02 | -16.09 | 20.24 | 4.27E-01 |
| cg17701100 | 11.19  | 5.71  | 4.99E-02 | 6.93   | 8.39  | 4.09E-01 | 17.88   | 12.87  | 1.65E-01 | -4.67  | 19.34 | 8.09E-01 | 19.21  | 11.33 | 9.00E-02 |
| cg03560256 | -19.29 | 9.84  | 4.99E-02 | -12.84 | 16.56 | 4.38E-01 | -1.06   | 25.72  | 9.67E-01 | -35.87 | 20.90 | 8.61E-02 | -23.85 | 18.62 | 2.00E-01 |
| cg15222899 | 11.19  | 5.70  | 4.99E-02 | 27.96  | 13.78 | 4.25E-02 | 7.01    | 16.85  | 6.78E-01 | 11.93  | 8.29  | 1.50E-01 | -0.21  | 11.62 | 9.85E-01 |
| cg22065439 | -31.02 | 15.82 | 4.99E-02 | -26.89 | 19.89 | 1.76E-01 | -104.67 | 75.00  | 1.63E-01 | -25.92 | 85.99 | 7.63E-01 | -29.31 | 29.40 | 3.19E-01 |
| cg08085597 | 5.16   | 2.63  | 4.99E-02 | 3.18   | 4.11  | 4.40E-01 | 1.20    | 6.01   | 8.42E-01 | 8.81   | 5.85  | 1.32E-01 | 9.42   | 5.95  | 1.13E-01 |
| cg20916120 | -8.13  | 4.14  | 4.99E-02 | -6.84  | 5.64  | 2.25E-01 | -16.59  | 10.17  | 1.03E-01 | -3.88  | 23.74 | 8.70E-01 | -5.92  | 8.08  | 4.64E-01 |
| cg07700266 | 27.77  | 14.16 | 4.99E-02 | -7.19  | 41.24 | 8.62E-01 | -29.65  | 135.94 | 8.27E-01 | 34.99  | 15.82 | 2.69E-02 | 12.78  | 53.79 | 8.12E-01 |
| cg23965022 | 16.55  | 8.44  | 4.99E-02 | 25.91  | 26.16 | 3.22E-01 | 63.02   | 92.46  | 4.96E-01 | 17.38  | 9.28  | 6.11E-02 | -17.09 | 34.16 | 6.17E-01 |
| cg04973493 | 9.47   | 4.83  | 4.99E-02 | 6.66   | 10.05 | 5.07E-01 | 7.18    | 13.04  | 5.82E-01 | 4.00   | 7.59  | 5.98E-01 | 23.44  | 10.13 | 2.07E-02 |
| cg08030282 | 20.26  | 10.33 | 4.99E-02 | 39.62  | 13.78 | 4.05E-03 | 11.52   | 17.41  | 5.08E-01 | 9.54   | 31.40 | 7.61E-01 | -4.22  | 22.67 | 8.52E-01 |
| cg15670005 | 21.22  | 10.82 | 4.99E-02 | 16.88  | 19.24 | 3.80E-01 | 20.20   | 42.22  | 6.32E-01 | 12.26  | 8.18  | 1.34E-01 | 71.00  | 28.18 | 1.18E-02 |
| cg01637175 | -3.86  | 1.97  | 4.99E-02 | -3.49  | 3.12  | 2.63E-01 | -7.39   | 4.03   | 6.67E-02 | 0.47   | 5.09  | 9.26E-01 | -3.65  | 4.28  | 3.93E-01 |
| cg22083560 | -9.58  | 4.89  | 4.99E-02 | -8.28  | 10.04 | 4.10E-01 | -7.88   | 18.09  | 6.63E-01 | -11.70 | 6.44  | 6.91E-02 | -2.65  | 14.50 | 8.55E-01 |

|            |        |       |          |        |       |          |        |       |          |        |       |          |        |       |          |
|------------|--------|-------|----------|--------|-------|----------|--------|-------|----------|--------|-------|----------|--------|-------|----------|
| cg18233931 | 15.88  | 8.10  | 4.99E-02 | 27.54  | 14.28 | 5.38E-02 | 23.48  | 16.78 | 1.62E-01 | 3.71   | 14.37 | 7.96E-01 | 2.89   | 22.69 | 8.98E-01 |
| cg02491878 | 8.81   | 4.49  | 4.99E-02 | 12.02  | 6.31  | 5.69E-02 | 6.67   | 10.86 | 5.39E-01 | 0.68   | 11.70 | 9.54E-01 | 8.44   | 10.71 | 4.31E-01 |
| cg06060754 | 3.17   | 1.62  | 4.99E-02 | 0.14   | 1.20  | 9.08E-01 | 5.50   | 2.04  | 6.94E-03 | 5.99   | 3.47  | 8.45E-02 | 3.51   | 2.42  | 1.47E-01 |
| cg06495233 | -8.31  | 4.24  | 4.99E-02 | -5.66  | 7.28  | 4.37E-01 | -16.58 | 10.15 | 1.02E-01 | -2.66  | 8.25  | 7.47E-01 | -12.57 | 8.98  | 1.61E-01 |
| cg07673181 | -26.28 | 13.40 | 4.99E-02 | -27.41 | 18.81 | 1.45E-01 | -34.60 | 40.14 | 3.89E-01 | -5.28  | 31.41 | 8.67E-01 | -37.96 | 30.07 | 2.07E-01 |
| cg02923485 | -8.03  | 4.09  | 4.99E-02 | -8.21  | 6.92  | 2.35E-01 | -9.07  | 7.91  | 2.52E-01 | -2.08  | 9.59  | 8.29E-01 | -11.73 | 9.16  | 2.01E-01 |
| cg09159389 | -33.41 | 17.04 | 4.99E-02 | -40.17 | 21.94 | 6.71E-02 | 16.09  | 55.89 | 7.73E-01 | -1.40  | 46.89 | 9.76E-01 | -61.10 | 41.13 | 1.37E-01 |
| cg18358643 | 16.55  | 8.44  | 4.99E-02 | 32.60  | 25.52 | 2.01E-01 | 29.98  | 93.27 | 7.48E-01 | 10.87  | 9.36  | 2.45E-01 | 56.43  | 32.13 | 7.91E-02 |
| cg02819992 | 8.23   | 4.20  | 4.99E-02 | 3.24   | 5.83  | 5.78E-01 | 15.64  | 8.39  | 6.21E-02 | 17.73  | 16.03 | 2.69E-01 | 8.69   | 10.41 | 4.04E-01 |
| cg12010750 | -12.87 | 6.56  | 4.99E-02 | -5.08  | 12.19 | 6.77E-01 | -13.39 | 16.89 | 4.28E-01 | -22.88 | 11.43 | 4.54E-02 | -7.99  | 13.68 | 5.59E-01 |
| cg12487088 | 7.63   | 3.89  | 4.99E-02 | 8.41   | 5.23  | 1.08E-01 | 13.19  | 9.58  | 1.69E-01 | 4.55   | 10.57 | 6.67E-01 | 1.20   | 10.23 | 9.06E-01 |
| cg03584506 | -6.75  | 3.44  | 4.99E-02 | -12.34 | 6.32  | 5.10E-02 | 1.81   | 7.67  | 8.13E-01 | -7.09  | 5.78  | 2.20E-01 | -6.39  | 9.01  | 4.78E-01 |
| cg15109126 | 13.91  | 7.09  | 4.99E-02 | 26.89  | 11.91 | 2.40E-02 | 12.32  | 14.06 | 3.81E-01 | 10.70  | 18.97 | 5.73E-01 | -1.04  | 14.17 | 9.41E-01 |
| cg14770102 | 17.59  | 8.97  | 4.99E-02 | 26.02  | 12.06 | 3.09E-02 | 19.07  | 23.06 | 4.08E-01 | 39.11  | 46.87 | 4.04E-01 | -4.44  | 17.67 | 8.02E-01 |
| cg10838410 | 7.19   | 3.67  | 4.99E-02 | 5.35   | 5.43  | 3.24E-01 | 18.41  | 9.23  | 4.60E-02 | 5.72   | 8.96  | 5.23E-01 | 4.03   | 7.85  | 6.08E-01 |
| cg26967100 | 11.72  | 5.98  | 4.99E-02 | 17.24  | 11.93 | 1.48E-01 | -0.19  | 15.11 | 9.90E-01 | 5.58   | 11.44 | 6.26E-01 | 18.45  | 10.57 | 8.10E-02 |
| cg04208403 | 12.59  | 6.42  | 4.99E-02 | 7.95   | 9.93  | 4.23E-01 | 8.72   | 16.37 | 5.94E-01 | 30.89  | 14.86 | 3.77E-02 | 8.94   | 13.07 | 4.94E-01 |
| cg03228773 | 16.78  | 8.56  | 4.99E-02 | 25.06  | 16.13 | 1.20E-01 | 19.77  | 15.50 | 2.02E-01 | 4.34   | 15.75 | 7.83E-01 | 20.46  | 24.96 | 4.12E-01 |
