# Supplementary material for: DNA methylation is associated with lung function in never smokers
Source: Springer Nature journal article supplement (doi:10.1186/s12931-019-1222-8), 2019-12-01
Supplement: MOESM2 [file 17459804]

Online supplement Table 2: Sensitivity analysis of the association of the top 36 CpG-sites with FEV<sub>1</sub>/FVC in 659 subjects that were not exposed to environmental tobacco smoke.

|            |                   | LL COPD&C (N=659) |       |          |
|------------|-------------------|-------------------|-------|----------|
|            |                   | Beta              | SE    | P-value  |
| cg10012512 | <i>Intergenic</i> | -43.08            | 14.31 | 2.62E-03 |
| cg02885771 | LTV1              | 10.34             | 10.18 | 3.10E-01 |
| cg25105536 | KLHL32            | -101.41           | 53.17 | 5.65E-02 |
| cg20102034 | RTKN              | 53.80             | 18.17 | 3.06E-03 |
| cg03703840 | KIAA1731          | 72.53             | 51.21 | 1.57E-01 |
| cg21614201 | SYNPO2            | -22.65            | 16.15 | 1.61E-01 |
| cg07957088 | PRIC285           | 36.15             | 18.31 | 4.83E-02 |
| cg05304461 | C1orf127          | -105.23           | 41.73 | 1.17E-02 |
| cg11749902 | <i>Intergenic</i> | -28.17            | 8.81  | 1.39E-03 |
| cg02207312 | PRPF19            | 130.16            | 63.55 | 4.06E-02 |
| cg19734370 | NPTX1             | 10.21             | 4.81  | 3.38E-02 |
| cg03077331 | FN3K              | 18.20             | 5.87  | 1.95E-03 |
| cg18387671 | ANKRD13B          | -118.99           | 81.41 | 1.44E-01 |
| cg03224276 | ZFH3              | 40.77             | 22.78 | 7.35E-02 |
| cg02137691 | FGFR3             | 6.88              | 15.62 | 6.60E-01 |
| cg25884324 | UNC45A            | -46.71            | 23.02 | 4.25E-02 |
| cg27158523 | PPIL4             | -61.75            | 26.33 | 1.90E-02 |
| cg01157143 | NAV2              | -19.16            | 18.38 | 2.97E-01 |
| cg07160694 | DCAF5             | 102.03            | 51.94 | 4.95E-02 |
| cg22127773 | KDM6B             | -55.43            | 22.74 | 1.48E-02 |
| cg20939319 | TEX15             | -22.73            | 9.88  | 2.15E-02 |
| cg02206852 | PROCA1            | 32.06             | 19.10 | 9.33E-02 |
| cg17075019 | <i>Intergenic</i> | 35.08             | 15.71 | 2.56E-02 |
| cg25556432 | <i>Intergenic</i> | 29.26             | 9.72  | 2.61E-03 |
| cg22742965 | TMEFF2            | -32.19            | 13.08 | 1.39E-02 |
| cg16734845 | CTDSPL2           | -49.45            | 26.87 | 6.57E-02 |
| cg09108394 | PRKCB             | -18.41            | 9.90  | 6.29E-02 |
| cg10034572 | <i>Intergenic</i> | -20.76            | 16.06 | 1.96E-01 |
| cg20066227 | C1QL3             | 37.09             | 21.28 | 8.13E-02 |
| cg07148038 | TNXB              | 30.78             | 19.81 | 1.20E-01 |
| cg23396786 | SFXN5             | 21.79             | 8.82  | 1.35E-02 |
| cg06218079 | TBCD              | 5.74              | 3.50  | 1.01E-01 |
| cg06982745 | ADAMTS14          | -35.28            | 21.97 | 1.08E-01 |
| cg05946118 | <i>Intergenic</i> | -13.58            | 8.23  | 9.90E-02 |
| cg08065963 | <i>Intergenic</i> | -18.04            | 6.92  | 9.13E-03 |
| cg12064372 | <i>Intergenic</i> | 33.93             | 21.78 | 1.19E-01 |
