# Supplementary material for: DNA methylation is associated with lung function in never smokers
Source: Springer Nature journal article supplement (doi:10.1186/s12931-019-1222-8), 2019-12-01
Supplement: MOESM3 [file 17459804]

Online supplement Table 3: Overview of association between DNA methylation and gene expression.

| Study      |                    |                 | Meta     |         |          | LL       |         |          | LLS      |         |          | NTR      |         |          | RS       |         |          |
|------------|--------------------|-----------------|----------|---------|----------|----------|---------|----------|----------|---------|----------|----------|---------|----------|----------|---------|----------|
| CpG-site   | N genes within 2MB | ENSG gene       | Beta     | SE      | P-value  | Beta     | SE      | P-value  | Beta     | SE      | P-value  | Beta     | SE      | P-value  | Beta     | SE      | P-value  |
| cg02137691 | 31                 | ENSG00000145217 | 0.01556  | 0.00376 | 3.53E-05 | 0.01180  | 0.00936 | 2.07E-01 | 0.01818  | 0.01212 | 1.34E-01 | 0.01837  | 0.00495 | 2.07E-04 | 0.00787  | 0.00929 | 3.97E-01 |
| cg08065963 | 12                 | ENSG00000183044 | 0.01274  | 0.00341 | 1.85E-04 | 0.00886  | 0.00805 | 2.71E-01 | 0.00865  | 0.01306 | 5.07E-01 | 0.01539  | 0.00412 | 1.87E-04 | 0.00045  | 0.01304 | 9.72E-01 |
| cg02206852 | 52                 | ENSG00000108256 | 0.00840  | 0.00217 | 1.06E-04 | 0.01120  | 0.00340 | 9.89E-04 | -0.00100 | 0.01014 | 9.21E-01 | 0.00508  | 0.00362 | 1.60E-01 | 0.01094  | 0.00498 | 2.80E-02 |
| cg22127773 | 80                 | ENSG00000167874 | 0.00105  | 0.00028 | 1.82E-04 | 0.00064  | 0.00092 | 4.88E-01 | 0.00071  | 0.00073 | 3.30E-01 | 0.00115  | 0.00033 | 5.78E-04 | 0.00140  | 0.00122 | 2.52E-01 |
| cg25105536 | 4                  | ENSG00000186231 | -0.00041 | 0.00015 | 5.52E-03 | -0.00053 | 0.00037 | 1.55E-01 | -0.00062 | 0.00047 | 1.82E-01 | -0.00033 | 0.00018 | 6.79E-02 | -0.00052 | 0.00049 | 2.94E-01 |
| cg02206852 | 52                 | ENSG00000108262 | 0.00801  | 0.00234 | 6.11E-04 | 0.01142  | 0.00592 | 5.37E-02 | 0.01125  | 0.00392 | 4.07E-03 | 0.00371  | 0.00364 | 3.09E-01 | 0.00914  | 0.00848 | 2.81E-01 |
| cg23396786 | 18                 | ENSG00000003137 | 0.00243  | 0.00078 | 1.78E-03 | 0.00415  | 0.00185 | 2.46E-02 | -0.00147 | 0.00307 | 6.33E-01 | 0.00224  | 0.00095 | 1.86E-02 | 0.00325  | 0.00261 | 2.13E-01 |
| cg07148038 | 89                 | ENSG00000250535 | 0.00354  | 0.00099 | 3.77E-04 | 0.00417  | 0.00494 | 3.98E-01 | 0.00065  | 0.00253 | 7.97E-01 | 0.00294  | 0.00127 | 2.10E-02 | 0.00571  | 0.00165 | 5.44E-04 |
| cg20939319 | 10                 | ENSG00000133872 | -0.00293 | 0.00100 | 3.36E-03 | -0.00248 | 0.00130 | 5.78E-02 | -0.00377 | 0.00233 | 1.06E-01 | -0.00603 | 0.00358 | 9.20E-02 | -0.00209 | 0.00257 | 4.16E-01 |
| cg07148038 | 89                 | ENSG00000213760 | 0.00738  | 0.00208 | 3.79E-04 | 0.01107  | 0.00686 | 1.07E-01 | 0.00491  | 0.00742 | 5.08E-01 | 0.00671  | 0.00289 | 2.01E-02 | 0.00800  | 0.00370 | 3.06E-02 |
| cg02885771 | 11                 | ENSG00000229036 | 0.00961  | 0.00329 | 3.51E-03 | 0.00246  | 0.00526 | 6.40E-01 | 0.00751  | 0.00609 | 2.17E-01 | 0.01696  | 0.00546 | 1.91E-03 | 0.01211  | 0.00632 | 5.52E-02 |
| cg05946118 | 12                 | ENSG00000263244 | -0.01444 | 0.00506 | 4.28E-03 | -0.02285 | 0.00636 | 3.26E-04 | -0.01575 | 0.01105 | 1.54E-01 | -0.01640 | 0.00393 | 3.04E-05 | 0.00712  | 0.01065 | 5.04E-01 |
| cg21614201 | 13                 | ENSG00000245958 | -0.00549 | 0.00195 | 4.84E-03 | -0.00475 | 0.00433 | 2.73E-01 | -0.01032 | 0.00307 | 7.85E-04 | -0.00276 | 0.00196 | 1.60E-01 | -0.00573 | 0.00492 | 2.45E-01 |
| cg25884324 | 20                 | ENSG00000140553 | -0.00187 | 0.00066 | 4.54E-03 | -0.00187 | 0.00162 | 2.49E-01 | -0.00260 | 0.00165 | 1.15E-01 | -0.00237 | 0.00096 | 1.30E-02 | -0.00009 | 0.00148 | 9.52E-01 |
| cg07148038 | 89                 | ENSG00000204256 | 0.00839  | 0.00257 | 1.07E-03 | 0.00399  | 0.00561 | 4.77E-01 | 0.00393  | 0.00657 | 5.49E-01 | 0.01236  | 0.00363 | 6.69E-04 | 0.00569  | 0.00687 | 4.08E-01 |
| cg02207312 | 37                 | ENSG00000134824 | -0.00082 | 0.00027 | 2.62E-03 | 0.00006  | 0.00072 | 9.39E-01 | -0.00147 | 0.00062 | 1.78E-02 | -0.00092 | 0.00039 | 1.74E-02 | -0.00054 | 0.00068 | 4.31E-01 |
| cg20102034 | 37                 | ENSG00000115317 | 0.01018  | 0.00339 | 2.65E-03 | 0.00175  | 0.00769 | 8.20E-01 | 0.01641  | 0.00882 | 6.27E-02 | 0.01341  | 0.00462 | 3.73E-03 | 0.00184  | 0.00972 | 8.50E-01 |
| cg22742965 | 4                  | ENSG00000168497 | 0.00463  | 0.00218 | 3.40E-02 | 0.00074  | 0.00550 | 8.93E-01 | 0.00621  | 0.00678 | 3.60E-01 | 0.00427  | 0.00268 | 1.11E-01 | 0.01372  | 0.00796 | 8.46E-02 |
| cg03077331 | 45                 | ENSG00000141580 | -0.00445 | 0.00152 | 3.53E-03 | -0.00753 | 0.01008 | 4.55E-01 | -0.00589 | 0.00336 | 7.99E-02 | -0.00395 | 0.00178 | 2.63E-02 | -0.00440 | 0.00793 | 5.79E-01 |
| cg10034572 | 8                  | ENSG00000226266 | -0.00413 | 0.00179 | 2.11E-02 | -0.00358 | 0.00337 | 2.88E-01 | -0.00782 | 0.00508 | 1.23E-01 | -0.00462 | 0.00248 | 6.28E-02 | 0.00358  | 0.00666 | 5.91E-01 |
| cg10034572 | 8                  | ENSG00000196151 | -0.00520 | 0.00227 | 2.21E-02 | -0.00402 | 0.00510 | 4.31E-01 | -0.01164 | 0.00879 | 1.86E-01 | -0.00590 | 0.00276 | 3.28E-02 | 0.00596  | 0.00927 | 5.20E-01 |
| cg25884324 | 20                 | ENSG00000185033 | -0.00101 | 0.00039 | 9.13E-03 | -0.00066 | 0.00118 | 5.74E-01 | -0.00160 | 0.00127 | 2.10E-01 | -0.00084 | 0.00046 | 6.60E-02 | -0.00226 | 0.00134 | 9.27E-02 |
| cg02206852 | 52                 | ENSG00000076604 | -0.00391 | 0.00134 | 3.58E-03 | -0.00333 | 0.00441 | 4.49E-01 | -0.00372 | 0.00181 | 3.95E-02 | -0.00364 | 0.00239 | 1.28E-01 | -0.01027 | 0.00681 | 1.31E-01 |
| cg06218079 | 42                 | ENSG00000266445 | 0.00152  | 0.00054 | 4.53E-03 | 0.00006  | 0.00197 | 9.74E-01 | 0.00324  | 0.00205 | 1.15E-01 | 0.00167  | 0.00061 | 5.93E-03 | -0.00009 | 0.00193 | 9.62E-01 |
| cg08065963 | 12                 | ENSG00000263244 | -0.01377 | 0.00573 | 1.63E-02 | -0.00663 | 0.00821 | 4.19E-01 | -0.01599 | 0.01354 | 2.38E-01 | -0.02274 | 0.00496 | 4.50E-06 | 0.00168  | 0.01326 | 8.99E-01 |
| cg05304461 | 26                 | ENSG00000120948 | 0.00058  | 0.00022 | 7.77E-03 | 0.00083  | 0.00045 | 6.37E-02 | 0.00084  | 0.00063 | 1.82E-01 | 0.00046  | 0.00029 | 1.10E-01 | 0.00027  | 0.00071 | 7.04E-01 |
| cg07148038 | 89                 | ENSG00000196126 | -0.00257 | 0.00084 | 2.30E-03 | -0.00223 | 0.00112 | 4.63E-02 | -0.00323 | 0.00170 | 5.72E-02 | -0.00119 | 0.00070 | 9.04E-02 | -0.00503 | 0.00146 | 5.63E-04 |
| cg08065963 | 12                 | ENSG00000262944 | -0.00906 | 0.00390 | 2.01E-02 | -0.01110 | 0.00741 | 1.34E-01 | -0.00892 | 0.00977 | 3.61E-01 | -0.01237 | 0.00497 | 1.29E-02 | 0.01012  | 0.01148 | 3.78E-01 |
| cg20066227 | 9                  | ENSG00000148484 | -0.00434 | 0.00197 | 2.78E-02 | -0.00839 | 0.00520 | 1.07E-01 | -0.00856 | 0.00644 | 1.84E-01 | -0.00357 | 0.00242 | 1.40E-01 | 0.00045  | 0.00629 | 9.44E-01 |
| cg05304461 | 26                 | ENSG00000171824 | -0.00037 | 0.00014 | 1.01E-02 | -0.00076 | 0.00062 | 2.20E-01 | -0.00144 | 0.00122 | 2.36E-01 | -0.00037 | 0.00017 | 2.74E-02 | -0.00019 | 0.00033 | 5.74E-01 |
| cg06982745 | 18                 | ENSG00000166228 | 0.00164  | 0.00068 | 1.53E-02 | -0.00039 | 0.00300 | 8.96E-01 | 0.00300  | 0.00135 | 2.69E-02 | 0.00115  | 0.00084 | 1.69E-01 | 0.00346  | 0.00313 | 2.70E-01 |
| cg25884324 | 20                 | ENSG00000184508 | 0.00358  | 0.00146 | 1.44E-02 | 0.00435  | 0.00308 | 1.58E-01 | 0.00977  | 0.00419 | 1.98E-02 | 0.00285  | 0.00180 | 1.12E-01 | 0.00010  | 0.00377 | 9.80E-01 |
| cg16734845 | 25                 | ENSG00000092470 | 0.00103  | 0.00041 | 1.20E-02 | 0.00103  | 0.00097 | 2.88E-01 | 0.00292  | 0.00132 | 2.73E-02 | 0.00080  | 0.00051 | 1.15E-01 | 0.00062  | 0.00160 | 6.99E-01 |
| cg20102034 | 37                 | ENSG00000114993 | -0.00844 | 0.00319 | 8.27E-03 | -0.00243 | 0.00844 | 7.73E-01 | -0.00023 | 0.01182 | 9.84E-01 | -0.00984 | 0.00382 | 9.89E-03 | -0.01417 | 0.01112 | 2.02E-01 |
| cg06218079 | 42                 | ENSG00000268852 | -0.00097 | 0.00036 | 7.34E-03 | -0.00067 | 0.00055 | 2.22E-01 | -0.00133 | 0.00053 | 1.21E-02 | -0.00044 | 0.00113 | 6.99E-01 | -0.00594 | 0.00686 | 3.87E-01 |

|            |    |                 |          |         |          |          |         |          |          |         |          |          |         |          |          |         |          |
|------------|----|-----------------|----------|---------|----------|----------|---------|----------|----------|---------|----------|----------|---------|----------|----------|---------|----------|
| cg10034572 | 8  | ENSG00000224152 | -0.00273 | 0.00132 | 3.87E-02 | -0.00133 | 0.00094 | 1.56E-01 | -0.00466 | 0.00170 | 6.01E-03 | -0.00009 | 0.00063 | 8.89E-01 | -0.00667 | 0.00185 | 3.03E-04 |
| cg03703840 | 14 | ENSG00000196371 | -0.00077 | 0.00034 | 2.26E-02 | 0.00009  | 0.00078 | 9.09E-01 | -0.00155 | 0.00079 | 4.89E-02 | -0.00107 | 0.00050 | 3.15E-02 | -0.00022 | 0.00073 | 7.59E-01 |
| cg10034572 | 8  | ENSG00000241399 | -0.00362 | 0.00178 | 4.19E-02 | -0.00514 | 0.00413 | 2.13E-01 | -0.01112 | 0.00608 | 6.75E-02 | -0.00235 | 0.00219 | 2.83E-01 | -0.00238 | 0.00695 | 7.32E-01 |
| cg07957088 | 43 | ENSG00000060491 | -0.00434 | 0.00165 | 8.42E-03 | -0.00037 | 0.00414 | 9.29E-01 | -0.00570 | 0.00456 | 2.11E-01 | -0.00540 | 0.00232 | 1.99E-02 | -0.00395 | 0.00363 | 2.77E-01 |
| cg25105536 | 4  | ENSG00000146263 | 0.00037  | 0.00022 | 9.26E-02 | -0.00007 | 0.00067 | 9.19E-01 | -0.00013 | 0.00076 | 8.61E-01 | 0.00054  | 0.00026 | 3.49E-02 | -0.00014 | 0.00082 | 8.63E-01 |
| cg07148038 | 89 | ENSG00000204252 | 0.00418  | 0.00146 | 4.19E-03 | 0.00537  | 0.00322 | 9.47E-02 | 0.00618  | 0.00372 | 9.66E-02 | 0.00425  | 0.00205 | 3.78E-02 | -0.00037 | 0.00407 | 9.27E-01 |
| cg25105536 | 4  | ENSG00000014123 | 0.00011  | 0.00007 | 9.65E-02 | 0.00027  | 0.00012 | 2.08E-02 | 0.00022  | 0.00016 | 1.76E-01 | 0.00006  | 0.00006 | 2.53E-01 | -0.00007 | 0.00014 | 6.41E-01 |
| cg09108394 | 15 | ENSG00000166501 | -0.00735 | 0.00340 | 3.08E-02 | -0.01109 | 0.00747 | 1.38E-01 | 0.00728  | 0.01205 | 5.46E-01 | -0.00729 | 0.00420 | 8.24E-02 | -0.01519 | 0.01453 | 2.96E-01 |
| cg07160694 | 13 | ENSG00000100650 | 0.00010  | 0.00005 | 3.64E-02 | 0.00014  | 0.00009 | 1.24E-01 | 0.00000  | 0.00018 | 9.89E-01 | 0.00007  | 0.00006 | 2.13E-01 | 0.00022  | 0.00017 | 1.87E-01 |
| cg22127773 | 80 | ENSG00000166579 | 0.00079  | 0.00029 | 6.14E-03 | 0.00085  | 0.00037 | 2.27E-02 | 0.00141  | 0.00120 | 2.42E-01 | 0.00074  | 0.00051 | 1.46E-01 | -0.00153 | 0.00188 | 4.17E-01 |
| cg25556432 | 15 | ENSG00000177483 | -0.00501 | 0.00238 | 3.48E-02 | -0.00915 | 0.00549 | 9.58E-02 | 0.00281  | 0.00627 | 6.54E-01 | -0.00659 | 0.00301 | 2.84E-02 | 0.00143  | 0.00791 | 8.56E-01 |
| cg06218079 | 42 | ENSG00000169750 | -0.00096 | 0.00039 | 1.30E-02 | -0.00011 | 0.00011 | 2.86E-01 | 0.00002  | 0.00011 | 8.81E-01 | -0.00177 | 0.00026 | 1.26E-11 | -0.00369 | 0.00086 | 1.73E-05 |
| cg18387671 | 42 | ENSG00000160602 | 0.00026  | 0.00010 | 1.32E-02 | 0.00010  | 0.00040 | 7.98E-01 | 0.00051  | 0.00028 | 7.17E-02 | 0.00031  | 0.00013 | 2.10E-02 | -0.00003 | 0.00024 | 9.09E-01 |
| cg07148038 | 89 | ENSG00000241404 | 0.00250  | 0.00091 | 6.21E-03 | -0.00529 | 0.00564 | 3.48E-01 | 0.00359  | 0.00202 | 7.55E-02 | 0.00239  | 0.00107 | 2.51E-02 | 0.00403  | 0.00465 | 3.86E-01 |
| cg08065963 | 12 | ENSG00000260276 | 0.00747  | 0.00375 | 4.65E-02 | 0.00173  | 0.00660 | 7.93E-01 | 0.01729  | 0.00937 | 6.50E-02 | 0.00433  | 0.00326 | 1.84E-01 | 0.01984  | 0.00958 | 3.85E-02 |
| cg20102034 | 37 | ENSG00000115275 | -0.00615 | 0.00253 | 1.52E-02 | 0.00166  | 0.00547 | 7.61E-01 | -0.01093 | 0.00672 | 1.04E-01 | -0.00775 | 0.00346 | 2.49E-02 | -0.00743 | 0.00778 | 3.39E-01 |
| cg16734845 | 25 | ENSG00000166734 | 0.00568  | 0.00251 | 2.37E-02 | 0.00519  | 0.00536 | 3.33E-01 | 0.00868  | 0.00600 | 1.48E-01 | 0.00574  | 0.00359 | 1.10E-01 | 0.00183  | 0.00736 | 8.03E-01 |
| cg03077331 | 45 | ENSG00000169750 | 0.00048  | 0.00019 | 1.37E-02 | -0.00146 | 0.00202 | 4.68E-01 | 0.00113  | 0.00078 | 1.45E-01 | 0.00050  | 0.00021 | 1.56E-02 | -0.00026 | 0.00078 | 7.41E-01 |
| cg07148038 | 89 | ENSG00000204257 | 0.00757  | 0.00281 | 6.97E-03 | 0.00399  | 0.00627 | 5.24E-01 | 0.00496  | 0.00891 | 5.78E-01 | 0.01031  | 0.00371 | 5.38E-03 | 0.00288  | 0.00786 | 7.14E-01 |
| cg02885771 | 11 | ENSG00000135604 | -0.00206 | 0.00108 | 5.79E-02 | -0.00489 | 0.00178 | 5.88E-03 | -0.00249 | 0.00273 | 3.61E-01 | -0.00063 | 0.00106 | 5.49E-01 | -0.00125 | 0.00234 | 5.94E-01 |
| cg06218079 | 42 | ENSG00000265678 | -0.00094 | 0.00039 | 1.61E-02 | -0.00195 | 0.00126 | 1.21E-01 | 0.00002  | 0.00149 | 9.88E-01 | -0.00087 | 0.00045 | 5.23E-02 | -0.00135 | 0.00153 | 3.79E-01 |
| cg10012512 | 7  | ENSG00000233038 | -0.00198 | 0.00120 | 9.90E-02 | -0.00277 | 0.00094 | 3.33E-03 | 0.00574  | 0.00513 | 2.63E-01 | -0.00393 | 0.00255 | 1.24E-01 | -0.00010 | 0.00228 | 9.65E-01 |
| cg05304461 | 26 | ENSG00000130939 | 0.00083  | 0.00038 | 2.77E-02 | 0.00087  | 0.00077 | 2.59E-01 | 0.00053  | 0.00116 | 6.51E-01 | 0.00117  | 0.00050 | 1.99E-02 | -0.00088 | 0.00119 | 4.58E-01 |
| cg02885771 | 11 | ENSG00000001036 | 0.00116  | 0.00064 | 6.87E-02 | -0.00045 | 0.00160 | 7.80E-01 | 0.00050  | 0.00239 | 8.35E-01 | 0.00146  | 0.00079 | 6.55E-02 | 0.00195  | 0.00176 | 2.68E-01 |
| cg22127773 | 80 | ENSG00000132535 | -0.00105 | 0.00041 | 9.83E-03 | -0.00145 | 0.00072 | 4.28E-02 | -0.00246 | 0.00131 | 5.99E-02 | -0.00070 | 0.00058 | 2.31E-01 | 0.00002  | 0.00142 | 9.88E-01 |
| cg12064372 | 10 | ENSG00000139160 | 0.00155  | 0.00091 | 8.91E-02 | -0.00039 | 0.00121 | 7.49E-01 | 0.00189  | 0.00227 | 4.04E-01 | 0.00204  | 0.00074 | 5.95E-03 | 0.00539  | 0.00294 | 6.66E-02 |
| cg09108394 | 15 | ENSG00000260482 | -0.00512 | 0.00274 | 6.18E-02 | -0.00494 | 0.00768 | 5.20E-01 | 0.00139  | 0.00997 | 8.89E-01 | -0.00732 | 0.00328 | 2.57E-02 | 0.00519  | 0.00872 | 5.52E-01 |
| cg07148038 | 89 | ENSG00000204387 | 0.00247  | 0.00097 | 1.12E-02 | 0.00103  | 0.00159 | 5.16E-01 | 0.00016  | 0.00220 | 9.44E-01 | 0.00390  | 0.00113 | 5.34E-04 | 0.00405  | 0.00307 | 1.87E-01 |
| cg02207312 | 37 | ENSG00000156738 | -0.00012 | 0.00005 | 2.96E-02 | -0.00012 | 0.00006 | 5.07E-02 | 0.00009  | 0.00066 | 8.98E-01 | -0.00002 | 0.00013 | 8.53E-01 | -0.00028 | 0.00019 | 1.35E-01 |
| cg07148038 | 89 | ENSG00000204528 | -0.00427 | 0.00171 | 1.27E-02 | 0.00297  | 0.00505 | 5.56E-01 | -0.00759 | 0.00493 | 1.24E-01 | -0.00457 | 0.00243 | 6.01E-02 | -0.00532 | 0.00331 | 1.08E-01 |
| cg20066227 | 9  | ENSG00000148488 | -0.00063 | 0.00041 | 1.28E-01 | 0.00008  | 0.00093 | 9.34E-01 | 0.00016  | 0.00123 | 8.99E-01 | -0.00113 | 0.00055 | 3.78E-02 | -0.00008 | 0.00124 | 9.46E-01 |
| cg07160694 | 13 | ENSG00000072110 | 0.00021  | 0.00013 | 9.22E-02 | 0.00000  | 0.00027 | 9.96E-01 | 0.00007  | 0.00036 | 8.53E-01 | 0.00024  | 0.00017 | 1.56E-01 | 0.00053  | 0.00034 | 1.19E-01 |
| cg23396786 | 18 | ENSG00000144034 | 0.00516  | 0.00284 | 6.92E-02 | 0.00185  | 0.00604 | 7.59E-01 | 0.00736  | 0.00770 | 3.39E-01 | 0.00524  | 0.00384 | 1.73E-01 | 0.00927  | 0.00920 | 3.14E-01 |
| cg10012512 | 7  | ENSG00000105982 | -0.00238 | 0.00179 | 1.85E-01 | -0.00320 | 0.00277 | 2.48E-01 | 0.00390  | 0.00343 | 2.55E-01 | -0.00405 | 0.00190 | 3.26E-02 | -0.00512 | 0.00454 | 2.60E-01 |
| cg19734370 | 32 | ENSG00000157637 | 0.00396  | 0.00195 | 4.23E-02 | 0.00071  | 0.00120 | 5.55E-01 | 0.00750  | 0.00246 | 2.31E-03 | 0.00120  | 0.00128 | 3.49E-01 | 0.01348  | 0.00469 | 4.07E-03 |
| cg10012512 | 7  | ENSG00000105983 | -0.00246 | 0.00191 | 1.98E-01 | 0.00058  | 0.00476 | 9.03E-01 | 0.00077  | 0.00682 | 9.11E-01 | -0.00328 | 0.00225 | 1.45E-01 | -0.00654 | 0.00992 | 5.10E-01 |
| cg20102034 | 37 | ENSG00000204872 | 0.00097  | 0.00047 | 3.78E-02 | -0.00256 | 0.00381 | 5.01E-01 | 0.00282  | 0.00486 | 5.62E-01 | 0.00140  | 0.00217 | 5.18E-01 | 0.00099  | 0.00049 | 4.16E-02 |
| cg25884324 | 20 | ENSG00000185043 | -0.00322 | 0.00183 | 7.80E-02 | -0.00796 | 0.00308 | 9.66E-03 | -0.00407 | 0.00355 | 2.52E-01 | -0.00017 | 0.00120 | 8.88E-01 | -0.00359 | 0.00258 | 1.65E-01 |
| cg02206852 | 52 | ENSG00000160602 | -0.00561 | 0.00259 | 3.05E-02 | -0.01143 | 0.00713 | 1.09E-01 | 0.00641  | 0.01096 | 5.59E-01 | -0.00533 | 0.00315 | 9.12E-02 | -0.00633 | 0.00706 | 3.70E-01 |
| cg09108394 | 15 | ENSG00000103365 | 0.00139  | 0.00086 | 1.06E-01 | 0.00112  | 0.00133 | 3.97E-01 | -0.00231 | 0.00225 | 3.05E-01 | 0.00239  | 0.00092 | 9.20E-03 | 0.00218  | 0.00249 | 3.81E-01 |
| cg22742965 | 4  | ENSG00000128641 | 0.00037  | 0.00044 | 4.00E-01 | -0.00061 | 0.00099 | 5.37E-01 | 0.00048  | 0.00146 | 7.45E-01 | 0.00089  | 0.00057 | 1.18E-01 | -0.00088 | 0.00141 | 5.32E-01 |
| cg06218079 | 42 | ENSG00000261888 | 0.00125  | 0.00060 | 3.82E-02 | 0.00005  | 0.00013 | 7.04E-01 | -0.00021 | 0.00017 | 2.31E-01 | 0.00476  | 0.00071 | 1.67E-11 | 0.00475  | 0.00340 | 1.63E-01 |

|            |    |                 |          |         |          |          |         |          |          |         |          |          |         |          |          |         |          |
|------------|----|-----------------|----------|---------|----------|----------|---------|----------|----------|---------|----------|----------|---------|----------|----------|---------|----------|
| cg22742965 | 4  | ENSG00000138378 | -0.00163 | 0.00194 | 4.02E-01 | 0.00231  | 0.00324 | 4.77E-01 | -0.00457 | 0.00335 | 1.73E-01 | 0.00041  | 0.00223 | 8.53E-01 | -0.00661 | 0.00368 | 7.21E-02 |
| cg17075019 | 4  | ENSG00000151208 | -0.00237 | 0.00284 | 4.04E-01 | -0.01202 | 0.00930 | 1.96E-01 | -0.00762 | 0.00999 | 4.46E-01 | -0.00182 | 0.00331 | 5.82E-01 | 0.00785  | 0.00947 | 4.08E-01 |
| cg05304461 | 26 | ENSG00000175206 | 0.00030  | 0.00016 | 6.27E-02 | 0.00031  | 0.00021 | 1.39E-01 | 0.00017  | 0.00032 | 5.90E-01 | 0.00078  | 0.00050 | 1.16E-01 | -0.00055 | 0.00105 | 5.98E-01 |
| cg11749902 | 11 | ENSG00000104368 | -0.00729 | 0.00508 | 1.52E-01 | -0.01715 | 0.01143 | 1.33E-01 | -0.01372 | 0.00798 | 8.58E-02 | -0.00513 | 0.00451 | 2.55E-01 | 0.02052  | 0.01700 | 2.27E-01 |
| cg03703840 | 14 | ENSG00000182919 | -0.00037 | 0.00024 | 1.19E-01 | -0.00041 | 0.00047 | 3.79E-01 | -0.00096 | 0.00044 | 2.78E-02 | -0.00023 | 0.00050 | 6.39E-01 | 0.00014  | 0.00044 | 7.51E-01 |
| cg25556432 | 15 | ENSG00000186235 | 0.00357  | 0.00225 | 1.14E-01 | 0.00699  | 0.00404 | 8.32E-02 | 0.00968  | 0.00459 | 3.48E-02 | 0.00190  | 0.00136 | 1.63E-01 | -0.00351 | 0.00546 | 5.21E-01 |
| cg06982745 | 18 | ENSG00000180817 | -0.00133 | 0.00080 | 9.64E-02 | -0.00409 | 0.00342 | 2.32E-01 | -0.00216 | 0.00104 | 3.68E-02 | -0.00030 | 0.00038 | 4.39E-01 | -0.00326 | 0.00244 | 1.82E-01 |
| cg09108394 | 15 | ENSG00000166847 | -0.00305 | 0.00194 | 1.16E-01 | -0.00310 | 0.00385 | 4.21E-01 | -0.00689 | 0.00479 | 1.50E-01 | -0.00154 | 0.00276 | 5.76E-01 | -0.00436 | 0.00671 | 5.16E-01 |
| cg03224276 | 13 | ENSG00000261337 | 0.00231  | 0.00154 | 1.34E-01 | 0.00383  | 0.00358 | 2.85E-01 | 0.00488  | 0.00397 | 2.19E-01 | -0.00032 | 0.00180 | 8.60E-01 | 0.00521  | 0.00297 | 7.94E-02 |
| cg27158523 | 11 | ENSG00000186625 | -0.00026 | 0.00018 | 1.60E-01 | -0.00043 | 0.00040 | 2.81E-01 | -0.00007 | 0.00054 | 9.03E-01 | -0.00025 | 0.00023 | 2.87E-01 | -0.00010 | 0.00076 | 8.91E-01 |
| cg22127773 | 80 | ENSG00000219200 | -0.00097 | 0.00043 | 2.21E-02 | -0.00109 | 0.00132 | 4.09E-01 | -0.00163 | 0.00070 | 2.05E-02 | -0.00010 | 0.00069 | 8.85E-01 | -0.00148 | 0.00109 | 1.73E-01 |
| cg20939319 | 10 | ENSG00000104691 | 0.00296  | 0.00220 | 1.79E-01 | 0.00649  | 0.00368 | 7.74E-02 | -0.00488 | 0.00599 | 4.15E-01 | 0.00417  | 0.00226 | 6.51E-02 | -0.00346 | 0.00671 | 6.05E-01 |
| cg11749902 | 11 | ENSG00000147533 | -0.00207 | 0.00149 | 1.64E-01 | -0.00341 | 0.00209 | 1.04E-01 | 0.00049  | 0.01678 | 9.77E-01 | -0.00321 | 0.00100 | 1.41E-03 | 0.00392  | 0.00321 | 2.22E-01 |
| cg07957088 | 43 | ENSG00000092758 | -0.00481 | 0.00237 | 4.21E-02 | 0.00522  | 0.00696 | 4.54E-01 | -0.00895 | 0.00909 | 3.25E-01 | -0.00590 | 0.00279 | 3.43E-02 | -0.00573 | 0.00760 | 4.51E-01 |
| cg05304461 | 26 | ENSG00000177000 | 0.00012  | 0.00007 | 7.02E-02 | 0.00028  | 0.00015 | 7.01E-02 | 0.00056  | 0.00069 | 4.12E-01 | 0.00009  | 0.00008 | 2.50E-01 | -0.00001 | 0.00022 | 9.48E-01 |
| cg20939319 | 10 | ENSG00000197265 | 0.00316  | 0.00238 | 1.85E-01 | 0.00111  | 0.00370 | 7.64E-01 | 0.00519  | 0.00515 | 3.14E-01 | 0.00740  | 0.00478 | 1.22E-01 | -0.00207 | 0.00681 | 7.62E-01 |
| cg07148038 | 89 | ENSG00000258388 | 0.00320  | 0.00139 | 2.12E-02 | 0.00175  | 0.00183 | 3.40E-01 | 0.00100  | 0.00580 | 8.62E-01 | 0.00630  | 0.00241 | 8.89E-03 | 0.00125  | 0.00723 | 8.63E-01 |
| cg03703840 | 14 | ENSG00000042429 | 0.00026  | 0.00017 | 1.34E-01 | 0.00034  | 0.00046 | 4.61E-01 | 0.00056  | 0.00042 | 1.80E-01 | 0.00015  | 0.00027 | 5.72E-01 | 0.00018  | 0.00032 | 5.68E-01 |
| cg08065963 | 12 | ENSG00000187555 | 0.00671  | 0.00475 | 1.57E-01 | -0.00286 | 0.00532 | 5.91E-01 | 0.01920  | 0.00721 | 7.73E-03 | 0.01007  | 0.00368 | 6.26E-03 | -0.00047 | 0.00925 | 9.60E-01 |
| cg08065963 | 12 | ENSG00000182831 | 0.00260  | 0.00187 | 1.64E-01 | -0.00100 | 0.00414 | 8.09E-01 | -0.00070 | 0.00630 | 9.12E-01 | 0.00428  | 0.00235 | 6.87E-02 | 0.00208  | 0.00668 | 7.55E-01 |
| cg03077331 | 45 | ENSG00000169738 | 0.00168  | 0.00084 | 4.50E-02 | 0.00101  | 0.00099 | 3.09E-01 | 0.00025  | 0.00034 | 4.67E-01 | 0.00111  | 0.00052 | 3.41E-02 | 0.00755  | 0.00177 | 1.99E-05 |
| cg23396786 | 18 | ENSG00000237883 | -0.00298 | 0.00189 | 1.14E-01 | 0.00234  | 0.00578 | 6.86E-01 | -0.00378 | 0.00849 | 6.56E-01 | -0.00247 | 0.00224 | 2.69E-01 | -0.00952 | 0.00513 | 6.36E-02 |
| cg05304461 | 26 | ENSG00000120942 | -0.00065 | 0.00037 | 7.93E-02 | 0.00036  | 0.00089 | 6.85E-01 | -0.00028 | 0.00160 | 8.63E-01 | -0.00086 | 0.00044 | 5.08E-02 | -0.00147 | 0.00152 | 3.35E-01 |
| cg03077331 | 45 | ENSG00000169718 | -0.00121 | 0.00061 | 4.63E-02 | -0.00007 | 0.00292 | 9.82E-01 | -0.00073 | 0.00121 | 5.43E-01 | -0.00158 | 0.00075 | 3.57E-02 | 0.00020  | 0.00273 | 9.42E-01 |
| cg18387671 | 42 | ENSG00000264577 | -0.00038 | 0.00020 | 5.09E-02 | -0.00048 | 0.00060 | 4.23E-01 | -0.00053 | 0.00040 | 1.87E-01 | -0.00036 | 0.00024 | 1.40E-01 | 0.00137  | 0.00144 | 3.42E-01 |
| cg07148038 | 89 | ENSG00000204301 | -0.00327 | 0.00145 | 2.41E-02 | -0.00234 | 0.00311 | 4.52E-01 | -0.00681 | 0.00395 | 8.45E-02 | -0.00229 | 0.00192 | 2.32E-01 | -0.00689 | 0.00520 | 1.85E-01 |
| cg17075019 | 4  | ENSG00000148606 | -0.00120 | 0.00196 | 5.38E-01 | -0.00318 | 0.00542 | 5.58E-01 | 0.00558  | 0.00491 | 2.55E-01 | -0.00289 | 0.00274 | 2.93E-01 | -0.00104 | 0.00434 | 8.11E-01 |
| cg27158523 | 11 | ENSG00000120253 | -0.00027 | 0.00021 | 1.97E-01 | -0.00059 | 0.00039 | 1.32E-01 | -0.00104 | 0.00061 | 9.05E-02 | -0.00006 | 0.00020 | 7.50E-01 | 0.00019  | 0.00075 | 7.95E-01 |
| cg07148038 | 89 | ENSG00000204427 | -0.00379 | 0.00169 | 2.51E-02 | -0.00692 | 0.01056 | 5.12E-01 | -0.00777 | 0.00351 | 2.69E-02 | -0.00352 | 0.00232 | 1.29E-01 | 0.00027  | 0.00366 | 9.41E-01 |
| cg06218079 | 42 | ENSG00000141574 | 0.00118  | 0.00061 | 5.33E-02 | 0.00094  | 0.00121 | 4.35E-01 | -0.00042 | 0.00145 | 7.70E-01 | 0.00172  | 0.00083 | 3.67E-02 | 0.00398  | 0.00463 | 3.90E-01 |
| cg11749902 | 11 | ENSG00000070718 | -0.00617 | 0.00488 | 2.06E-01 | -0.00418 | 0.00621 | 5.01E-01 | -0.01964 | 0.00651 | 2.54E-03 | 0.00221  | 0.00300 | 4.61E-01 | -0.00694 | 0.00655 | 2.89E-01 |
| cg01157143 | 9  | ENSG00000179057 | 0.00468  | 0.00409 | 2.53E-01 | 0.01359  | 0.00573 | 1.78E-02 | -0.00382 | 0.00623 | 5.40E-01 | 0.00048  | 0.00303 | 8.73E-01 | 0.01286  | 0.00835 | 1.24E-01 |
| cg27158523 | 11 | ENSG00000220848 | -0.00060 | 0.00048 | 2.10E-01 | -0.00173 | 0.00069 | 1.17E-02 | -0.00050 | 0.00131 | 7.05E-01 | -0.00011 | 0.00011 | 3.28E-01 | -0.00045 | 0.00146 | 7.59E-01 |
| cg20066227 | 9  | ENSG00000165985 | 0.00225  | 0.00199 | 2.59E-01 | -0.00433 | 0.00415 | 2.97E-01 | 0.00095  | 0.00458 | 8.35E-01 | 0.00453  | 0.00189 | 1.67E-02 | 0.00398  | 0.00457 | 3.83E-01 |
| cg20066227 | 9  | ENSG00000107611 | -0.00123 | 0.00109 | 2.59E-01 | -0.00206 | 0.00275 | 4.52E-01 | 0.00066  | 0.00255 | 7.96E-01 | -0.00206 | 0.00160 | 1.96E-01 | -0.00032 | 0.00246 | 8.96E-01 |
| cg27158523 | 11 | ENSG00000131013 | 0.00056  | 0.00045 | 2.16E-01 | 0.00080  | 0.00049 | 1.04E-01 | 0.00170  | 0.00071 | 1.59E-02 | -0.00021 | 0.00031 | 4.97E-01 | 0.00033  | 0.00101 | 7.46E-01 |
| cg20102034 | 37 | ENSG00000144048 | -0.00237 | 0.00128 | 6.41E-02 | -0.00317 | 0.00611 | 6.05E-01 | -0.00775 | 0.00944 | 4.12E-01 | -0.00310 | 0.00153 | 4.25E-02 | 0.00040  | 0.00266 | 8.80E-01 |
| cg03224276 | 13 | ENSG00000187008 | -0.00229 | 0.00175 | 1.91E-01 | 0.00207  | 0.00284 | 4.67E-01 | -0.00548 | 0.00275 | 4.65E-02 | -0.00046 | 0.00116 | 6.94E-01 | -0.00572 | 0.00221 | 9.73E-03 |
| cg05304461 | 26 | ENSG00000116685 | -0.00046 | 0.00028 | 9.62E-02 | -0.00023 | 0.00069 | 7.38E-01 | -0.00037 | 0.00107 | 7.29E-01 | -0.00056 | 0.00033 | 9.31E-02 | -0.00014 | 0.00102 | 8.90E-01 |
| cg25105536 | 4  | ENSG00000123545 | 0.00012  | 0.00024 | 6.26E-01 | 0.00083  | 0.00039 | 3.13E-02 | -0.00021 | 0.00038 | 5.71E-01 | -0.00021 | 0.00022 | 3.28E-01 | 0.00027  | 0.00037 | 4.76E-01 |
| cg03077331 | 45 | ENSG00000169696 | -0.00861 | 0.00450 | 5.57E-02 | -0.01929 | 0.00771 | 1.24E-02 | -0.00407 | 0.00304 | 1.81E-01 | 0.00034  | 0.00108 | 7.54E-01 | -0.02625 | 0.00867 | 2.46E-03 |
| cg02137691 | 31 | ENSG00000123933 | -0.00850 | 0.00487 | 8.10E-02 | 0.00387  | 0.00932 | 6.78E-01 | 0.00167  | 0.01177 | 8.88E-01 | -0.01489 | 0.00404 | 2.28E-04 | -0.01261 | 0.00905 | 1.63E-01 |

|            |    |                 |          |         |          |          |         |          |          |         |          |          |         |          |          |         |          |
|------------|----|-----------------|----------|---------|----------|----------|---------|----------|----------|---------|----------|----------|---------|----------|----------|---------|----------|
| cg03077331 | 45 | ENSG00000178927 | 0.00038  | 0.00020 | 5.61E-02 | 0.00209  | 0.00796 | 7.93E-01 | -0.00203 | 0.00345 | 5.57E-01 | 0.00045  | 0.00021 | 2.90E-02 | -0.00036 | 0.00069 | 6.01E-01 |
| cg02206852 | 52 | ENSG00000244045 | -0.00302 | 0.00153 | 4.93E-02 | -0.00744 | 0.00897 | 4.07E-01 | -0.00581 | 0.00385 | 1.31E-01 | -0.00230 | 0.00171 | 1.80E-01 | -0.00349 | 0.01605 | 8.28E-01 |
| cg07160694 | 13 | ENSG00000029364 | -0.00011 | 0.00008 | 1.97E-01 | 0.00007  | 0.00008 | 4.16E-01 | -0.00028 | 0.00015 | 7.06E-02 | -0.00003 | 0.00004 | 5.64E-01 | -0.00034 | 0.00012 | 5.41E-03 |
| cg23396786 | 18 | ENSG00000144036 | 0.00881  | 0.00601 | 1.43E-01 | -0.00747 | 0.01044 | 4.74E-01 | 0.00822  | 0.01396 | 5.56E-01 | 0.01679  | 0.00664 | 1.15E-02 | 0.01274  | 0.01534 | 4.06E-01 |
| cg03703840 | 14 | ENSG00000110218 | 0.00035  | 0.00026 | 1.85E-01 | -0.00016 | 0.00079 | 8.43E-01 | -0.00028 | 0.00083 | 7.32E-01 | 0.00053  | 0.00033 | 1.06E-01 | 0.00036  | 0.00069 | 6.01E-01 |
| cg08065963 | 12 | ENSG00000140650 | 0.00314  | 0.00254 | 2.17E-01 | 0.00463  | 0.00433 | 2.86E-01 | 0.01152  | 0.00518 | 2.62E-02 | 0.00102  | 0.00274 | 7.10E-01 | -0.00250 | 0.00516 | 6.29E-01 |
| cg10034572 | 8  | ENSG00000136536 | -0.00212 | 0.00216 | 3.28E-01 | 0.00072  | 0.00469 | 8.79E-01 | 0.00801  | 0.00705 | 2.56E-01 | -0.00422 | 0.00220 | 5.48E-02 | -0.00344 | 0.00791 | 6.63E-01 |
| cg17075019 | 4  | ENSG00000138326 | 0.00037  | 0.00084 | 6.59E-01 | 0.00306  | 0.00165 | 6.46E-02 | -0.00212 | 0.00210 | 3.12E-01 | -0.00008 | 0.00071 | 9.15E-01 | 0.00053  | 0.00165 | 7.48E-01 |
| cg03224276 | 13 | ENSG00000182149 | -0.00158 | 0.00125 | 2.08E-01 | -0.00065 | 0.00232 | 7.80E-01 | -0.00347 | 0.00219 | 1.14E-01 | 0.00063  | 0.00133 | 6.33E-01 | -0.00418 | 0.00210 | 4.69E-02 |
| cg05946118 | 12 | ENSG00000067365 | 0.00098  | 0.00084 | 2.40E-01 | 0.00267  | 0.00105 | 1.11E-02 | 0.00025  | 0.00179 | 8.91E-01 | -0.00024 | 0.00057 | 6.72E-01 | 0.00171  | 0.00156 | 2.71E-01 |
| cg03077331 | 45 | ENSG00000263731 | -0.00270 | 0.00146 | 6.44E-02 | 0.00517  | 0.00610 | 3.97E-01 | -0.00213 | 0.00246 | 3.87E-01 | -0.00395 | 0.00194 | 4.20E-02 | -0.00047 | 0.00970 | 9.61E-01 |
| cg02206852 | 52 | ENSG00000258472 | -0.00292 | 0.00153 | 5.70E-02 | -0.00194 | 0.00171 | 2.56E-01 | 0.00154  | 0.01380 | 9.11E-01 | -0.00319 | 0.00646 | 6.22E-01 | -0.00932 | 0.00427 | 2.92E-02 |
| cg06982745 | 18 | ENSG00000099284 | 0.00115  | 0.00083 | 1.66E-01 | -0.00260 | 0.00296 | 3.79E-01 | 0.00318  | 0.00258 | 2.18E-01 | 0.00130  | 0.00096 | 1.77E-01 | 0.00081  | 0.00298 | 7.86E-01 |
| cg19734370 | 32 | ENSG00000173894 | 0.00127  | 0.00076 | 9.32E-02 | 0.00227  | 0.00101 | 2.51E-02 | -0.00055 | 0.00232 | 8.11E-01 | 0.00023  | 0.00119 | 8.48E-01 | 0.00676  | 0.00629 | 2.83E-01 |
| cg19734370 | 32 | ENSG00000141582 | 0.00177  | 0.00106 | 9.47E-02 | 0.00054  | 0.00097 | 5.78E-01 | 0.00473  | 0.00193 | 1.44E-02 | 0.00087  | 0.00147 | 5.54E-01 | 0.00558  | 0.00458 | 2.22E-01 |
| cg11749902 | 11 | ENSG00000158669 | -0.00719 | 0.00663 | 2.78E-01 | 0.01199  | 0.00933 | 1.99E-01 | -0.01354 | 0.00924 | 1.43E-01 | -0.00444 | 0.00355 | 2.10E-01 | -0.02873 | 0.01164 | 1.36E-02 |
| cg20939319 | 10 | ENSG00000104687 | 0.00268  | 0.00264 | 3.11E-01 | -0.00029 | 0.00634 | 9.63E-01 | -0.00374 | 0.00963 | 6.98E-01 | 0.00436  | 0.00317 | 1.70E-01 | -0.00020 | 0.01093 | 9.86E-01 |
| cg10012512 | 7  | ENSG00000009335 | -0.00030 | 0.00040 | 4.49E-01 | 0.00044  | 0.00085 | 6.09E-01 | -0.00126 | 0.00144 | 3.81E-01 | -0.00038 | 0.00049 | 4.43E-01 | -0.00102 | 0.00175 | 5.58E-01 |
| cg03703840 | 14 | ENSG00000166012 | 0.00028  | 0.00023 | 2.25E-01 | 0.00044  | 0.00057 | 4.33E-01 | 0.00083  | 0.00059 | 1.62E-01 | 0.00022  | 0.00033 | 5.03E-01 | -0.00020 | 0.00058 | 7.27E-01 |
| cg03224276 | 13 | ENSG00000102984 | -0.00147 | 0.00126 | 2.45E-01 | -0.00204 | 0.00192 | 2.87E-01 | -0.00236 | 0.00152 | 1.20E-01 | 0.00135  | 0.00099 | 1.72E-01 | -0.00328 | 0.00114 | 4.04E-03 |
| cg10012512 | 7  | ENSG00000105993 | 0.00108  | 0.00146 | 4.61E-01 | -0.00078 | 0.00271 | 7.73E-01 | 0.00701  | 0.00413 | 8.97E-02 | 0.00021  | 0.00161 | 8.94E-01 | 0.00558  | 0.00592 | 3.46E-01 |
| cg25556432 | 15 | ENSG00000132330 | 0.00099  | 0.00081 | 2.22E-01 | 0.00380  | 0.00187 | 4.18E-02 | 0.00088  | 0.00292 | 7.64E-01 | 0.00025  | 0.00100 | 8.05E-01 | 0.00059  | 0.00297 | 8.42E-01 |
| cg22742965 | 4  | ENSG00000173559 | -0.00030 | 0.00144 | 8.33E-01 | 0.00241  | 0.00312 | 4.40E-01 | -0.00546 | 0.00412 | 1.85E-01 | -0.00063 | 0.00189 | 7.39E-01 | 0.00252  | 0.00490 | 6.07E-01 |
| cg01157143 | 9  | ENSG00000151116 | -0.00150 | 0.00169 | 3.74E-01 | 0.00326  | 0.00363 | 3.69E-01 | -0.00163 | 0.00529 | 7.58E-01 | -0.00287 | 0.00217 | 1.85E-01 | -0.00379 | 0.00604 | 5.31E-01 |
| cg11749902 | 11 | ENSG00000083168 | 0.00325  | 0.00319 | 3.08E-01 | 0.00949  | 0.01051 | 3.66E-01 | -0.00470 | 0.01328 | 7.24E-01 | 0.00242  | 0.00357 | 4.98E-01 | 0.01385  | 0.01399 | 3.22E-01 |
| cg16734845 | 25 | ENSG00000166710 | 0.00254  | 0.00171 | 1.37E-01 | 0.00377  | 0.00312 | 2.27E-01 | -0.00137 | 0.00335 | 6.83E-01 | 0.00556  | 0.00347 | 1.10E-01 | 0.00213  | 0.00384 | 5.79E-01 |
| cg03224276 | 13 | ENSG00000102967 | 0.00022  | 0.00020 | 2.65E-01 | 0.00012  | 0.00058 | 8.33E-01 | 0.00096  | 0.00065 | 1.37E-01 | 0.00015  | 0.00025 | 5.58E-01 | 0.00014  | 0.00045 | 7.53E-01 |
| cg02207312 | 37 | ENSG00000167985 | -0.00052 | 0.00031 | 9.31E-02 | -0.00007 | 0.00006 | 2.11E-01 | -0.00163 | 0.00092 | 7.55E-02 | -0.00010 | 0.00027 | 6.99E-01 | -0.00144 | 0.00044 | 1.07E-03 |
| cg02206852 | 52 | ENSG00000167536 | -0.00051 | 0.00028 | 6.66E-02 | -0.00048 | 0.00029 | 9.29E-02 | -0.00152 | 0.00159 | 3.42E-01 | -0.00066 | 0.00289 | 8.19E-01 | -0.00017 | 0.00558 | 9.75E-01 |
| cg20939319 | 10 | ENSG00000177669 | 0.00231  | 0.00245 | 3.47E-01 | -0.00293 | 0.00725 | 6.85E-01 | 0.01079  | 0.01250 | 3.88E-01 | 0.00270  | 0.00271 | 3.19E-01 | 0.00051  | 0.01456 | 9.72E-01 |
| cg21614201 | 13 | ENSG00000260091 | 0.00261  | 0.00236 | 2.69E-01 | 0.00907  | 0.00480 | 5.89E-02 | 0.00123  | 0.00595 | 8.37E-01 | 0.00006  | 0.00170 | 9.73E-01 | 0.00837  | 0.00775 | 2.80E-01 |
| cg02885771 | 11 | ENSG00000268402 | 0.00403  | 0.00405 | 3.20E-01 | -0.00359 | 0.00908 | 6.92E-01 | 0.01147  | 0.01058 | 2.78E-01 | 0.00703  | 0.00570 | 2.17E-01 | -0.00332 | 0.01054 | 7.52E-01 |
| cg07148038 | 89 | ENSG00000204348 | -0.00522 | 0.00254 | 3.99E-02 | -0.00466 | 0.00666 | 4.84E-01 | 0.00597  | 0.00736 | 4.17E-01 | -0.00766 | 0.00347 | 2.73E-02 | -0.00574 | 0.00568 | 3.12E-01 |
| cg12064372 | 10 | ENSG00000188375 | 0.00058  | 0.00062 | 3.55E-01 | -0.00038 | 0.00125 | 7.62E-01 | -0.00061 | 0.00242 | 8.01E-01 | 0.00104  | 0.00077 | 1.79E-01 | 0.00108  | 0.00345 | 7.55E-01 |
| cg03703840 | 14 | ENSG00000134627 | 0.00025  | 0.00022 | 2.54E-01 | 0.00022  | 0.00044 | 6.22E-01 | -0.00013 | 0.00051 | 7.93E-01 | 0.00017  | 0.00041 | 6.73E-01 | 0.00062  | 0.00042 | 1.39E-01 |
| cg20939319 | 10 | ENSG00000157110 | -0.00215 | 0.00234 | 3.57E-01 | 0.00304  | 0.00458 | 5.07E-01 | -0.00922 | 0.00688 | 1.80E-01 | -0.00344 | 0.00313 | 2.71E-01 | 0.00065  | 0.00917 | 9.43E-01 |
| cg02207312 | 37 | ENSG00000257052 | -0.00076 | 0.00046 | 9.69E-02 | -0.00257 | 0.00105 | 1.49E-02 | -0.00096 | 0.00057 | 9.10E-02 | -0.00074 | 0.00043 | 8.90E-02 | 0.00041  | 0.00063 | 5.14E-01 |
| cg08065963 | 12 | ENSG00000260349 | 0.00604  | 0.00582 | 2.99E-01 | -0.00235 | 0.00837 | 7.79E-01 | -0.00460 | 0.01357 | 7.35E-01 | 0.00686  | 0.00430 | 1.10E-01 | 0.03317  | 0.01465 | 2.36E-02 |
| cg12064372 | 10 | ENSG00000223722 | 0.00032  | 0.00035 | 3.61E-01 | -0.00049 | 0.00063 | 4.32E-01 | 0.00113  | 0.00095 | 2.35E-01 | 0.00056  | 0.00050 | 2.60E-01 | 0.00090  | 0.00160 | 5.75E-01 |
| cg01157143 | 9  | ENSG00000179119 | 0.00252  | 0.00300 | 4.02E-01 | -0.00029 | 0.00726 | 9.68E-01 | -0.00277 | 0.00771 | 7.20E-01 | 0.00436  | 0.00400 | 2.76E-01 | 0.00463  | 0.00886 | 6.01E-01 |
| cg02885771 | 11 | ENSG00000034693 | 0.00209  | 0.00216 | 3.32E-01 | 0.00209  | 0.00528 | 6.92E-01 | -0.00096 | 0.00566 | 8.66E-01 | 0.00357  | 0.00310 | 2.49E-01 | 0.00076  | 0.00480 | 8.75E-01 |
| cg23396786 | 18 | ENSG00000204872 | -0.00373 | 0.00293 | 2.03E-01 | -0.02372 | 0.01211 | 5.02E-02 | 0.01420  | 0.01745 | 4.16E-01 | -0.00333 | 0.00407 | 4.13E-01 | -0.00290 | 0.00254 | 2.54E-01 |

|            |    |                 |          |         |          |          |         |          |          |         |          |          |         |          |          |         |          |
|------------|----|-----------------|----------|---------|----------|----------|---------|----------|----------|---------|----------|----------|---------|----------|----------|---------|----------|
| cg21614201 | 13 | ENSG00000260404 | 0.00293  | 0.00273 | 2.82E-01 | 0.01085  | 0.00547 | 4.73E-02 | 0.00429  | 0.00235 | 6.72E-02 | -0.00315 | 0.00224 | 1.59E-01 | 0.00412  | 0.00366 | 2.60E-01 |
| cg06982745 | 18 | ENSG00000172731 | 0.00212  | 0.00167 | 2.05E-01 | 0.00341  | 0.00334 | 3.07E-01 | 0.00421  | 0.00243 | 8.39E-02 | -0.00096 | 0.00147 | 5.15E-01 | 0.00505  | 0.00357 | 1.57E-01 |
| cg25556432 | 15 | ENSG00000144488 | -0.00345 | 0.00298 | 2.47E-01 | -0.00508 | 0.00853 | 5.52E-01 | 0.00736  | 0.01082 | 4.96E-01 | -0.00309 | 0.00348 | 3.74E-01 | -0.01620 | 0.01135 | 1.53E-01 |
| cg05304461 | 26 | ENSG00000162444 | -0.00031 | 0.00021 | 1.43E-01 | -0.00067 | 0.00043 | 1.17E-01 | -0.00064 | 0.00071 | 3.67E-01 | -0.00005 | 0.00027 | 8.45E-01 | -0.00106 | 0.00092 | 2.49E-01 |
| cg03703840 | 14 | ENSG00000166004 | -0.00014 | 0.00013 | 2.68E-01 | -0.00005 | 0.00016 | 7.65E-01 | 0.00009  | 0.00020 | 6.57E-01 | -0.00078 | 0.00037 | 3.46E-02 | -0.00021 | 0.00016 | 1.87E-01 |
| cg05946118 | 12 | ENSG00000262944 | -0.00387 | 0.00387 | 3.18E-01 | -0.01189 | 0.00591 | 4.43E-02 | -0.00243 | 0.00816 | 7.66E-01 | -0.00414 | 0.00403 | 3.05E-01 | 0.01158  | 0.00961 | 2.28E-01 |
| cg07160694 | 13 | ENSG00000242071 | -0.00022 | 0.00021 | 3.00E-01 | -0.00020 | 0.00052 | 7.04E-01 | 0.00024  | 0.00038 | 5.24E-01 | -0.00050 | 0.00031 | 1.04E-01 | -0.00035 | 0.00075 | 6.37E-01 |
| cg19734370 | 32 | ENSG00000262580 | 0.00026  | 0.00017 | 1.22E-01 | 0.00010  | 0.00028 | 7.18E-01 | 0.00024  | 0.00056 | 6.60E-01 | 0.00039  | 0.00023 | 9.07E-02 | -0.00395 | 0.00376 | 2.93E-01 |
| cg17075019 | 4  | ENSG00000156113 | -0.00003 | 0.00191 | 9.89E-01 | -0.00289 | 0.00521 | 5.79E-01 | 0.00580  | 0.00606 | 3.38E-01 | -0.00030 | 0.00236 | 8.98E-01 | -0.00013 | 0.00570 | 9.81E-01 |
| cg23396786 | 18 | ENSG00000116127 | 0.00566  | 0.00463 | 2.22E-01 | 0.00189  | 0.00584 | 7.47E-01 | -0.00919 | 0.00898 | 3.06E-01 | 0.00780  | 0.00313 | 1.27E-02 | 0.02180  | 0.00907 | 1.62E-02 |
| cg05304461 | 26 | ENSG00000054523 | -0.00041 | 0.00029 | 1.55E-01 | -0.00002 | 0.00078 | 9.77E-01 | -0.00030 | 0.00121 | 8.05E-01 | -0.00062 | 0.00033 | 6.36E-02 | 0.00114  | 0.00115 | 3.23E-01 |
| cg05304461 | 26 | ENSG00000198793 | 0.00052  | 0.00037 | 1.55E-01 | 0.00116  | 0.00080 | 1.44E-01 | 0.00152  | 0.00127 | 2.32E-01 | 0.00047  | 0.00044 | 2.86E-01 | -0.00088 | 0.00102 | 3.87E-01 |
| cg02206852 | 52 | ENSG00000109111 | 0.00184  | 0.00104 | 7.77E-02 | 0.00143  | 0.00176 | 4.17E-01 | -0.00313 | 0.00441 | 4.78E-01 | 0.00222  | 0.00153 | 1.49E-01 | 0.00375  | 0.00289 | 1.95E-01 |
| cg06982745 | 18 | ENSG00000079332 | -0.00099 | 0.00081 | 2.25E-01 | -0.00044 | 0.00177 | 8.03E-01 | -0.00305 | 0.00124 | 1.43E-02 | 0.00028  | 0.00081 | 7.29E-01 | -0.00121 | 0.00140 | 3.87E-01 |
| cg23396786 | 18 | ENSG00000116096 | 0.00731  | 0.00603 | 2.25E-01 | -0.00940 | 0.01047 | 3.69E-01 | 0.02651  | 0.01395 | 5.74E-02 | 0.00718  | 0.00443 | 1.05E-01 | 0.01439  | 0.01452 | 3.22E-01 |
| cg01157143 | 9  | ENSG00000151117 | -0.00283 | 0.00375 | 4.51E-01 | -0.00255 | 0.00714 | 7.21E-01 | 0.01478  | 0.01108 | 1.82E-01 | -0.00673 | 0.00379 | 7.54E-02 | 0.00024  | 0.01170 | 9.84E-01 |
| cg09108394 | 15 | ENSG00000004779 | 0.00060  | 0.00055 | 2.72E-01 | 0.00053  | 0.00120 | 6.61E-01 | 0.00005  | 0.00195 | 9.78E-01 | 0.00087  | 0.00069 | 2.11E-01 | -0.00067 | 0.00190 | 7.26E-01 |
| cg12064372 | 10 | ENSG00000013573 | 0.00008  | 0.00010 | 4.12E-01 | -0.00008 | 0.00019 | 6.72E-01 | 0.00032  | 0.00039 | 4.12E-01 | 0.00016  | 0.00013 | 2.13E-01 | -0.00032 | 0.00046 | 4.78E-01 |
| cg12064372 | 10 | ENSG00000177359 | 0.00038  | 0.00047 | 4.14E-01 | -0.00033 | 0.00097 | 7.35E-01 | 0.00207  | 0.00159 | 1.94E-01 | 0.00035  | 0.00058 | 5.50E-01 | 0.00135  | 0.00227 | 5.51E-01 |
| cg03703840 | 14 | ENSG00000234106 | -0.00025 | 0.00024 | 2.96E-01 | 0.00023  | 0.00088 | 7.92E-01 | -0.00225 | 0.00107 | 3.63E-02 | -0.00007 | 0.00013 | 5.98E-01 | -0.00037 | 0.00029 | 2.02E-01 |
| cg21614201 | 13 | ENSG00000145388 | -0.00101 | 0.00103 | 3.27E-01 | -0.00410 | 0.00283 | 1.47E-01 | 0.00056  | 0.00227 | 8.05E-01 | -0.00055 | 0.00143 | 7.01E-01 | -0.00207 | 0.00272 | 4.46E-01 |
| cg02885771 | 11 | ENSG00000189007 | -0.00339 | 0.00401 | 3.97E-01 | -0.00158 | 0.01024 | 8.77E-01 | -0.00383 | 0.01509 | 8.00E-01 | -0.00298 | 0.00484 | 5.38E-01 | -0.00919 | 0.01328 | 4.89E-01 |
| cg08065963 | 12 | ENSG00000260979 | -0.00288 | 0.00317 | 3.64E-01 | -0.00372 | 0.00426 | 3.83E-01 | -0.00561 | 0.00540 | 2.99E-01 | -0.00654 | 0.00285 | 2.15E-02 | 0.01135  | 0.00689 | 9.97E-02 |
| cg09108394 | 15 | ENSG00000122257 | -0.00331 | 0.00315 | 2.92E-01 | -0.00125 | 0.00599 | 8.35E-01 | -0.01730 | 0.00823 | 3.55E-02 | -0.00064 | 0.00320 | 8.41E-01 | -0.00416 | 0.00953 | 6.62E-01 |
| cg20066227 | 9  | ENSG00000165983 | 0.00106  | 0.00153 | 4.90E-01 | 0.00287  | 0.00334 | 3.90E-01 | 0.00073  | 0.00362 | 8.40E-01 | 0.00186  | 0.00219 | 3.96E-01 | -0.00490 | 0.00442 | 2.68E-01 |
| cg10012512 | 7  | ENSG00000146909 | 0.00110  | 0.00236 | 6.40E-01 | 0.00291  | 0.00526 | 5.81E-01 | 0.00426  | 0.00875 | 6.26E-01 | -0.00035 | 0.00285 | 9.03E-01 | 0.01091  | 0.01165 | 3.49E-01 |
| cg07148038 | 89 | ENSG00000234745 | -0.00214 | 0.00109 | 5.04E-02 | -0.00071 | 0.00422 | 8.67E-01 | -0.00655 | 0.00275 | 1.74E-02 | -0.00145 | 0.00145 | 3.16E-01 | -0.00124 | 0.00219 | 5.73E-01 |
| cg10034572 | 8  | ENSG00000054219 | 0.00029  | 0.00050 | 5.64E-01 | -0.00077 | 0.00083 | 3.55E-01 | 0.00230  | 0.00146 | 1.17E-01 | 0.00053  | 0.00048 | 2.64E-01 | -0.00022 | 0.00139 | 8.71E-01 |
| cg03703840 | 14 | ENSG00000168876 | 0.00028  | 0.00029 | 3.23E-01 | 0.00073  | 0.00069 | 2.90E-01 | 0.00037  | 0.00074 | 6.16E-01 | 0.00043  | 0.00043 | 3.11E-01 | -0.00041 | 0.00060 | 4.96E-01 |
| cg20102034 | 37 | ENSG00000235499 | -0.00098 | 0.00064 | 1.23E-01 | -0.00575 | 0.00638 | 3.68E-01 | -0.00721 | 0.00720 | 3.17E-01 | -0.00086 | 0.00065 | 1.81E-01 | -0.00371 | 0.00765 | 6.28E-01 |
| cg02206852 | 52 | ENSG00000132591 | 0.00225  | 0.00132 | 8.79E-02 | 0.00438  | 0.00381 | 2.50E-01 | 0.00173  | 0.00168 | 3.02E-01 | 0.00028  | 0.00055 | 6.10E-01 | 0.00482  | 0.00149 | 1.22E-03 |
| cg05304461 | 26 | ENSG00000130940 | 0.00056  | 0.00042 | 1.76E-01 | 0.00082  | 0.00087 | 3.46E-01 | -0.00027 | 0.00156 | 8.64E-01 | 0.00088  | 0.00052 | 8.88E-02 | -0.00154 | 0.00138 | 2.65E-01 |
| cg19734370 | 32 | ENSG00000167291 | 0.00158  | 0.00108 | 1.44E-01 | 0.00269  | 0.00155 | 8.16E-02 | -0.00033 | 0.00358 | 9.27E-01 | 0.00100  | 0.00170 | 5.57E-01 | -0.00459 | 0.00716 | 5.22E-01 |
| cg03077331 | 45 | ENSG00000183010 | -0.00024 | 0.00015 | 1.04E-01 | -0.00004 | 0.00047 | 9.34E-01 | -0.00018 | 0.00020 | 3.48E-01 | -0.00041 | 0.00027 | 1.35E-01 | -0.00119 | 0.00182 | 5.13E-01 |
| cg01157143 | 9  | ENSG00000177054 | 0.00088  | 0.00139 | 5.27E-01 | 0.00560  | 0.00465 | 2.28E-01 | -0.00169 | 0.00218 | 4.38E-01 | 0.00079  | 0.00344 | 8.18E-01 | 0.00269  | 0.00235 | 2.53E-01 |
| cg22127773 | 80 | ENSG00000040633 | -0.00082 | 0.00044 | 5.96E-02 | -0.00118 | 0.00078 | 1.29E-01 | 0.00085  | 0.00116 | 4.65E-01 | -0.00104 | 0.00060 | 8.19E-02 | -0.00147 | 0.00405 | 7.17E-01 |
| cg05304461 | 26 | ENSG00000011021 | -0.00027 | 0.00021 | 1.84E-01 | -0.00045 | 0.00046 | 3.24E-01 | -0.00016 | 0.00061 | 7.90E-01 | -0.00041 | 0.00028 | 1.45E-01 | 0.00040  | 0.00054 | 4.67E-01 |
| cg23396786 | 18 | ENSG00000235499 | 0.00318  | 0.00289 | 2.71E-01 | 0.00873  | 0.00799 | 2.75E-01 | 0.00063  | 0.01240 | 9.60E-01 | 0.00394  | 0.00282 | 1.62E-01 | -0.01534 | 0.01156 | 1.85E-01 |
| cg20939319 | 10 | ENSG00000104695 | -0.00223 | 0.00322 | 4.89E-01 | 0.00364  | 0.00704 | 6.05E-01 | 0.00148  | 0.01227 | 9.04E-01 | -0.00517 | 0.00397 | 1.93E-01 | 0.00495  | 0.01291 | 7.02E-01 |
| cg19734370 | 32 | ENSG00000167302 | -0.00165 | 0.00115 | 1.54E-01 | -0.00012 | 0.00078 | 8.82E-01 | -0.00486 | 0.00143 | 6.75E-04 | -0.00136 | 0.00112 | 2.26E-01 | 0.00053  | 0.00342 | 8.77E-01 |
| cg02206852 | 52 | ENSG00000196535 | -0.00671 | 0.00401 | 9.45E-02 | -0.01360 | 0.00471 | 3.85E-03 | -0.00036 | 0.00124 | 7.68E-01 | -0.01101 | 0.00392 | 5.04E-03 | -0.00268 | 0.00786 | 7.33E-01 |
| cg07160694 | 13 | ENSG00000100647 | 0.00019  | 0.00021 | 3.79E-01 | 0.00017  | 0.00051 | 7.35E-01 | -0.00123 | 0.00090 | 1.69E-01 | 0.00033  | 0.00025 | 1.97E-01 | -0.00006 | 0.00085 | 9.44E-01 |

|            |    |                 |          |         |          |          |         |          |          |         |          |          |         |          |          |         |          |
|------------|----|-----------------|----------|---------|----------|----------|---------|----------|----------|---------|----------|----------|---------|----------|----------|---------|----------|
| cg02206852 | 52 | ENSG00000109107 | -0.00264 | 0.00158 | 9.50E-02 | -0.00226 | 0.00337 | 5.03E-01 | -0.00530 | 0.00663 | 4.24E-01 | -0.00258 | 0.00194 | 1.85E-01 | -0.00225 | 0.00651 | 7.30E-01 |
| cg02207312 | 37 | ENSG00000183134 | -0.00004 | 0.00003 | 1.35E-01 | -0.00007 | 0.00018 | 7.14E-01 | -0.00003 | 0.00004 | 4.13E-01 | -0.00008 | 0.00006 | 1.91E-01 | -0.00009 | 0.00016 | 5.70E-01 |
| cg08065963 | 12 | ENSG00000184857 | 0.00094  | 0.00117 | 4.21E-01 | 0.00354  | 0.00145 | 1.46E-02 | 0.00146  | 0.00249 | 5.56E-01 | -0.00005 | 0.00094 | 9.55E-01 | -0.00217 | 0.00261 | 4.07E-01 |
| cg05304461 | 26 | ENSG00000175262 | 0.00012  | 0.00009 | 1.96E-01 | 0.00002  | 0.00008 | 8.27E-01 | -0.00001 | 0.00012 | 9.27E-01 | 0.00030  | 0.00015 | 4.17E-02 | 0.00053  | 0.00028 | 5.75E-02 |
| cg01157143 | 9  | ENSG00000109854 | -0.00100 | 0.00175 | 5.68E-01 | -0.00253 | 0.00375 | 4.99E-01 | -0.00369 | 0.00436 | 3.97E-01 | 0.00007  | 0.00253 | 9.77E-01 | 0.00081  | 0.00465 | 8.62E-01 |
| cg06982745 | 18 | ENSG00000138316 | -0.00024 | 0.00022 | 2.85E-01 | 0.00019  | 0.00060 | 7.49E-01 | -0.00065 | 0.00064 | 3.11E-01 | -0.00011 | 0.00028 | 6.97E-01 | -0.00118 | 0.00071 | 9.69E-02 |
| cg05946118 | 12 | ENSG00000184857 | -0.00046 | 0.00059 | 4.35E-01 | -0.00002 | 0.00120 | 9.85E-01 | 0.00150  | 0.00206 | 4.67E-01 | -0.00073 | 0.00076 | 3.35E-01 | -0.00171 | 0.00207 | 4.08E-01 |
| cg10034572 | 8  | ENSG00000153250 | 0.00056  | 0.00125 | 6.55E-01 | 0.00033  | 0.00265 | 9.02E-01 | 0.00024  | 0.00431 | 9.56E-01 | -0.00008 | 0.00157 | 9.60E-01 | 0.00785  | 0.00487 | 1.07E-01 |
| cg02137691 | 31 | ENSG00000185049 | -0.00856 | 0.00623 | 1.70E-01 | -0.01784 | 0.00992 | 7.23E-02 | -0.01981 | 0.00953 | 3.76E-02 | -0.01015 | 0.00428 | 1.77E-02 | 0.00876  | 0.00674 | 1.94E-01 |
| cg20939319 | 10 | ENSG00000104671 | -0.00116 | 0.00183 | 5.28E-01 | 0.00095  | 0.00372 | 7.98E-01 | -0.00249 | 0.00498 | 6.16E-01 | -0.00220 | 0.00262 | 4.02E-01 | 0.00020  | 0.00509 | 9.68E-01 |
| cg03703840 | 14 | ENSG00000256745 | -0.00011 | 0.00013 | 3.77E-01 | 0.00140  | 0.00089 | 1.17E-01 | -0.00051 | 0.00093 | 5.80E-01 | -0.00011 | 0.00034 | 7.48E-01 | -0.00015 | 0.00012 | 2.21E-01 |
| cg08065963 | 12 | ENSG00000153048 | 0.00269  | 0.00350 | 4.41E-01 | 0.00693  | 0.00746 | 3.53E-01 | 0.01030  | 0.01011 | 3.09E-01 | 0.00279  | 0.00327 | 3.93E-01 | -0.01518 | 0.01096 | 1.66E-01 |
| cg21614201 | 13 | ENSG00000269893 | 0.00160  | 0.00194 | 4.11E-01 | -0.00135 | 0.00208 | 5.16E-01 | 0.00980  | 0.00413 | 1.76E-02 | 0.00131  | 0.00147 | 3.74E-01 | -0.00054 | 0.00621 | 9.31E-01 |
| cg05946118 | 12 | ENSG00000260349 | 0.00257  | 0.00339 | 4.48E-01 | -0.00804 | 0.00674 | 2.33E-01 | 0.00421  | 0.01143 | 7.13E-01 | 0.00552  | 0.00346 | 1.11E-01 | 0.00770  | 0.01205 | 5.23E-01 |
| cg07160694 | 13 | ENSG00000081177 | 0.00020  | 0.00025 | 4.15E-01 | -0.00050 | 0.00047 | 2.87E-01 | 0.00019  | 0.00072 | 7.92E-01 | 0.00049  | 0.00021 | 1.64E-02 | 0.00008  | 0.00072 | 9.17E-01 |
| cg18387671 | 42 | ENSG00000167543 | 0.00009  | 0.00006 | 1.29E-01 | 0.00036  | 0.00051 | 4.76E-01 | -0.00018 | 0.00048 | 7.13E-01 | 0.00010  | 0.00006 | 9.49E-02 | -0.00002 | 0.00016 | 8.77E-01 |
| cg01157143 | 9  | ENSG00000129173 | -0.00129 | 0.00253 | 6.10E-01 | -0.00396 | 0.00640 | 5.36E-01 | 0.00246  | 0.00858 | 7.75E-01 | -0.00131 | 0.00304 | 6.67E-01 | 0.00033  | 0.01001 | 9.73E-01 |
| cg07957088 | 43 | ENSG00000101246 | -0.00172 | 0.00114 | 1.30E-01 | 0.00085  | 0.00554 | 8.78E-01 | -0.00631 | 0.00909 | 4.87E-01 | -0.00160 | 0.00139 | 2.49E-01 | -0.00219 | 0.00221 | 3.22E-01 |
| cg05304461 | 26 | ENSG00000177674 | 0.00032  | 0.00026 | 2.18E-01 | 0.00009  | 0.00049 | 8.57E-01 | 0.00153  | 0.00171 | 3.71E-01 | 0.00047  | 0.00035 | 1.72E-01 | -0.00011 | 0.00081 | 8.94E-01 |
| cg02206852 | 52 | ENSG00000168792 | 0.00244  | 0.00153 | 1.10E-01 | -0.00422 | 0.00423 | 3.19E-01 | 0.00448  | 0.00239 | 6.10E-02 | 0.00351  | 0.00170 | 3.91E-02 | 0.00015  | 0.00382 | 9.68E-01 |
| cg02137691 | 31 | ENSG00000063978 | -0.00400 | 0.00302 | 1.85E-01 | -0.00770 | 0.00493 | 1.19E-01 | -0.01233 | 0.00456 | 6.82E-03 | 0.00000  | 0.00274 | 9.99E-01 | 0.00081  | 0.00361 | 8.23E-01 |
| cg05946118 | 12 | ENSG00000140650 | 0.00180  | 0.00254 | 4.79E-01 | 0.00681  | 0.00344 | 4.75E-02 | 0.00589  | 0.00422 | 1.63E-01 | -0.00217 | 0.00220 | 3.24E-01 | -0.00175 | 0.00420 | 6.77E-01 |
| cg02137691 | 31 | ENSG00000168884 | 0.00279  | 0.00211 | 1.87E-01 | 0.00755  | 0.00240 | 1.65E-03 | 0.00217  | 0.00319 | 4.96E-01 | -0.00150 | 0.00208 | 4.70E-01 | 0.00324  | 0.00270 | 2.29E-01 |
| cg03224276 | 13 | ENSG00000140836 | -0.00019 | 0.00025 | 4.48E-01 | 0.00047  | 0.00064 | 4.61E-01 | 0.00012  | 0.00075 | 8.68E-01 | -0.00051 | 0.00033 | 1.24E-01 | 0.00007  | 0.00060 | 9.00E-01 |
| cg16734845 | 25 | ENSG00000167004 | -0.00311 | 0.00261 | 2.33E-01 | -0.00630 | 0.00647 | 3.30E-01 | -0.01272 | 0.00755 | 9.21E-02 | 0.00109  | 0.00214 | 6.11E-01 | -0.00455 | 0.00312 | 1.45E-01 |
| cg07957088 | 43 | ENSG00000197457 | 0.00106  | 0.00071 | 1.36E-01 | 0.00092  | 0.00086 | 2.79E-01 | 0.00169  | 0.00143 | 2.36E-01 | 0.00077  | 0.00329 | 8.16E-01 | -0.00400 | 0.00741 | 5.89E-01 |
| cg07160694 | 13 | ENSG00000100632 | -0.00020 | 0.00027 | 4.56E-01 | -0.00039 | 0.00026 | 1.33E-01 | -0.00115 | 0.00043 | 7.83E-03 | 0.00003  | 0.00015 | 8.25E-01 | 0.00061  | 0.00043 | 1.63E-01 |
| cg03077331 | 45 | ENSG00000141556 | 0.00046  | 0.00030 | 1.32E-01 | -0.00189 | 0.00200 | 3.43E-01 | 0.00096  | 0.00087 | 2.70E-01 | 0.00043  | 0.00034 | 1.98E-01 | 0.00099  | 0.00180 | 5.82E-01 |
| cg06982745 | 18 | ENSG00000107731 | 0.00153  | 0.00159 | 3.35E-01 | 0.00555  | 0.00326 | 8.85E-02 | 0.00041  | 0.00328 | 9.02E-01 | -0.00054 | 0.00122 | 6.60E-01 | 0.00476  | 0.00354 | 1.79E-01 |
| cg08065963 | 12 | ENSG00000067365 | -0.00038 | 0.00058 | 5.04E-01 | -0.00042 | 0.00133 | 7.53E-01 | 0.00077  | 0.00217 | 7.24E-01 | -0.00059 | 0.00071 | 4.04E-01 | 0.00033  | 0.00195 | 8.64E-01 |
| cg16734845 | 25 | ENSG00000242028 | -0.00229 | 0.00196 | 2.42E-01 | -0.00041 | 0.00339 | 9.03E-01 | -0.00228 | 0.00359 | 5.24E-01 | -0.00532 | 0.00338 | 1.15E-01 | 0.01216  | 0.01198 | 3.10E-01 |
| cg02206852 | 52 | ENSG00000004139 | 0.00067  | 0.00043 | 1.17E-01 | -0.00028 | 0.00110 | 7.96E-01 | 0.00180  | 0.00159 | 2.60E-01 | 0.00057  | 0.00052 | 2.76E-01 | 0.00221  | 0.00143 | 1.21E-01 |
| cg07160694 | 13 | ENSG00000139990 | 0.00013  | 0.00018 | 4.66E-01 | -0.00004 | 0.00041 | 9.24E-01 | 0.00071  | 0.00051 | 1.59E-01 | -0.00001 | 0.00023 | 9.59E-01 | 0.00064  | 0.00061 | 2.91E-01 |
| cg22127773 | 80 | ENSG00000170037 | 0.00028  | 0.00016 | 7.67E-02 | 0.00030  | 0.00016 | 6.57E-02 | 0.00051  | 0.00213 | 8.12E-01 | -0.00010 | 0.00085 | 9.08E-01 | -0.00258 | 0.00383 | 5.01E-01 |
| cg10012512 | 7  | ENSG00000244291 | -0.00031 | 0.00209 | 8.81E-01 | 0.00373  | 0.00341 | 2.74E-01 | 0.00097  | 0.00618 | 8.75E-01 | -0.00151 | 0.00225 | 5.02E-01 | -0.01132 | 0.00815 | 1.65E-01 |
| cg03077331 | 45 | ENSG00000169660 | -0.00146 | 0.00098 | 1.37E-01 | 0.00232  | 0.00428 | 5.88E-01 | -0.00300 | 0.00135 | 2.66E-02 | -0.00056 | 0.00046 | 2.20E-01 | -0.00466 | 0.00328 | 1.55E-01 |
| cg20066227 | 9  | ENSG00000107614 | -0.00104 | 0.00261 | 6.91E-01 | 0.00749  | 0.00467 | 1.09E-01 | -0.00340 | 0.00500 | 4.96E-01 | -0.00395 | 0.00189 | 3.60E-02 | -0.00104 | 0.00539 | 8.47E-01 |
| cg02207312 | 37 | ENSG00000214787 | -0.00017 | 0.00012 | 1.68E-01 | -0.00102 | 0.00052 | 5.25E-02 | -0.00007 | 0.00020 | 7.19E-01 | -0.00017 | 0.00018 | 3.56E-01 | -0.00008 | 0.00031 | 7.92E-01 |
| cg03224276 | 13 | ENSG00000140829 | 0.00053  | 0.00075 | 4.80E-01 | 0.00224  | 0.00181 | 2.16E-01 | -0.00201 | 0.00188 | 2.86E-01 | 0.00111  | 0.00083 | 1.83E-01 | -0.00046 | 0.00153 | 7.65E-01 |
| cg21614201 | 13 | ENSG00000225892 | -0.00055 | 0.00079 | 4.90E-01 | 0.00110  | 0.00353 | 7.56E-01 | -0.00059 | 0.00110 | 5.93E-01 | 0.00038  | 0.00049 | 4.31E-01 | -0.00293 | 0.00137 | 3.24E-02 |
| cg22127773 | 80 | ENSG00000072818 | -0.00071 | 0.00040 | 8.01E-02 | -0.00070 | 0.00075 | 3.48E-01 | -0.00097 | 0.00141 | 4.90E-01 | -0.00060 | 0.00051 | 2.43E-01 | -0.00683 | 0.00465 | 1.42E-01 |
| cg06982745 | 18 | ENSG00000229097 | -0.00090 | 0.00097 | 3.57E-01 | 0.00050  | 0.00088 | 5.74E-01 | -0.00461 | 0.00145 | 1.51E-03 | 0.00050  | 0.00078 | 5.24E-01 | -0.00109 | 0.00108 | 3.11E-01 |

|            |    |                 |          |         |          |          |         |          |          |         |          |          |         |          |          |         |          |
|------------|----|-----------------|----------|---------|----------|----------|---------|----------|----------|---------|----------|----------|---------|----------|----------|---------|----------|
| cg03224276 | 13 | ENSG00000259901 | 0.00118  | 0.00174 | 4.97E-01 | -0.00040 | 0.00323 | 9.01E-01 | 0.00072  | 0.00293 | 8.07E-01 | -0.00122 | 0.00179 | 4.95E-01 | 0.00593  | 0.00248 | 1.66E-02 |
| cg01157143 | 9  | ENSG00000074319 | 0.00019  | 0.00052 | 7.20E-01 | 0.00014  | 0.00114 | 9.03E-01 | 0.00216  | 0.00179 | 2.26E-01 | 0.00012  | 0.00065 | 8.55E-01 | -0.00117 | 0.00178 | 5.12E-01 |
| cg22127773 | 80 | ENSG00000213876 | -0.00111 | 0.00064 | 8.21E-02 | -0.00150 | 0.00095 | 1.17E-01 | 0.00329  | 0.00335 | 3.27E-01 | -0.00108 | 0.00090 | 2.30E-01 | -0.00116 | 0.00533 | 8.27E-01 |
| cg03224276 | 13 | ENSG00000257017 | 0.00047  | 0.00070 | 5.05E-01 | -0.00058 | 0.00188 | 7.57E-01 | 0.00206  | 0.00164 | 2.08E-01 | 0.00022  | 0.00101 | 8.26E-01 | 0.00032  | 0.00157 | 8.40E-01 |
| cg12064372 | 10 | ENSG00000110888 | 0.00015  | 0.00034 | 6.64E-01 | -0.00007 | 0.00064 | 9.08E-01 | 0.00060  | 0.00090 | 5.02E-01 | 0.00037  | 0.00049 | 4.50E-01 | -0.00121 | 0.00120 | 3.13E-01 |
| cg03077331 | 45 | ENSG00000141574 | -0.00237 | 0.00164 | 1.48E-01 | -0.00306 | 0.00579 | 5.97E-01 | -0.00386 | 0.00190 | 4.24E-02 | -0.00007 | 0.00101 | 9.43E-01 | -0.00798 | 0.00463 | 8.50E-02 |
| cg12064372 | 10 | ENSG00000133704 | 0.00035  | 0.00081 | 6.68E-01 | -0.00159 | 0.00108 | 1.40E-01 | 0.00243  | 0.00179 | 1.76E-01 | 0.00076  | 0.00059 | 1.96E-01 | 0.00110  | 0.00263 | 6.75E-01 |
| cg27158523 | 11 | ENSG00000178199 | -0.00022 | 0.00044 | 6.14E-01 | 0.00002  | 0.00079 | 9.76E-01 | -0.00112 | 0.00134 | 4.06E-01 | 0.00014  | 0.00036 | 7.04E-01 | -0.00273 | 0.00156 | 8.12E-02 |
| cg22127773 | 80 | ENSG00000161944 | 0.00108  | 0.00062 | 8.45E-02 | 0.00213  | 0.00135 | 1.15E-01 | -0.00001 | 0.00326 | 9.96E-01 | 0.00103  | 0.00074 | 1.64E-01 | -0.00351 | 0.00348 | 3.13E-01 |
| cg02885771 | 11 | ENSG00000169976 | -0.00341 | 0.00685 | 6.19E-01 | 0.00473  | 0.00806 | 5.57E-01 | -0.02927 | 0.00965 | 2.42E-03 | 0.00406  | 0.00369 | 2.70E-01 | 0.00128  | 0.00898 | 8.87E-01 |
| cg03224276 | 13 | ENSG00000263320 | -0.00042 | 0.00066 | 5.27E-01 | 0.00092  | 0.00136 | 4.98E-01 | -0.00020 | 0.00121 | 8.66E-01 | 0.00008  | 0.00046 | 8.62E-01 | -0.00251 | 0.00105 | 1.73E-02 |
| cg07148038 | 89 | ENSG00000213676 | -0.00134 | 0.00076 | 7.74E-02 | -0.00127 | 0.00078 | 1.05E-01 | 0.00515  | 0.00824 | 5.32E-01 | -0.00329 | 0.00349 | 3.46E-01 | -0.00433 | 0.00798 | 5.87E-01 |
| cg05304461 | 26 | ENSG00000204624 | -0.00013 | 0.00011 | 2.66E-01 | -0.00141 | 0.00092 | 1.28E-01 | -0.00010 | 0.00012 | 4.03E-01 | -0.00031 | 0.00049 | 5.22E-01 | 0.00066  | 0.00158 | 6.76E-01 |
| cg07148038 | 89 | ENSG00000204315 | 0.00116  | 0.00066 | 7.78E-02 | 0.00090  | 0.00352 | 7.99E-01 | 0.00185  | 0.00395 | 6.39E-01 | 0.00052  | 0.00055 | 3.40E-01 | 0.00298  | 0.00122 | 1.46E-02 |
| cg16734845 | 25 | ENSG00000137770 | 0.00143  | 0.00133 | 2.81E-01 | -0.00022 | 0.00305 | 9.44E-01 | 0.00516  | 0.00382 | 1.77E-01 | 0.00149  | 0.00167 | 3.71E-01 | -0.00158 | 0.00546 | 7.72E-01 |
| cg19734370 | 32 | ENSG00000141527 | 0.00092  | 0.00075 | 2.20E-01 | 0.00003  | 0.00079 | 9.68E-01 | 0.00328  | 0.00137 | 1.63E-02 | 0.00030  | 0.00108 | 7.78E-01 | 0.00144  | 0.00256 | 5.74E-01 |
| cg12064372 | 10 | ENSG00000151743 | -0.00005 | 0.00014 | 7.04E-01 | 0.00026  | 0.00022 | 2.24E-01 | -0.00021 | 0.00044 | 6.36E-01 | -0.00021 | 0.00017 | 2.18E-01 | -0.00034 | 0.00061 | 5.72E-01 |
| cg23396786 | 18 | ENSG00000135624 | -0.00317 | 0.00371 | 3.93E-01 | -0.00710 | 0.00749 | 3.43E-01 | 0.00922  | 0.01040 | 3.75E-01 | -0.00438 | 0.00508 | 3.89E-01 | -0.00280 | 0.01220 | 8.19E-01 |
| cg25884324 | 20 | ENSG00000183208 | 0.00066  | 0.00071 | 3.56E-01 | 0.00005  | 0.00159 | 9.76E-01 | 0.00195  | 0.00175 | 2.65E-01 | 0.00007  | 0.00101 | 9.42E-01 | 0.00210  | 0.00192 | 2.73E-01 |
| cg12064372 | 10 | ENSG00000170456 | 0.00017  | 0.00046 | 7.12E-01 | -0.00057 | 0.00078 | 4.65E-01 | 0.00122  | 0.00129 | 3.43E-01 | 0.00030  | 0.00066 | 6.54E-01 | 0.00151  | 0.00216 | 4.85E-01 |
| cg27158523 | 11 | ENSG00000055211 | 0.00008  | 0.00018 | 6.48E-01 | 0.00031  | 0.00040 | 4.41E-01 | -0.00028 | 0.00050 | 5.75E-01 | 0.00009  | 0.00023 | 7.01E-01 | 0.00004  | 0.00057 | 9.41E-01 |
| cg02206852 | 52 | ENSG00000265205 | -0.00233 | 0.00157 | 1.38E-01 | -0.00146 | 0.00328 | 6.57E-01 | -0.00694 | 0.00754 | 3.58E-01 | -0.00153 | 0.00192 | 4.26E-01 | -0.01195 | 0.00664 | 7.19E-02 |
| cg07160694 | 13 | ENSG00000185650 | 0.00022  | 0.00037 | 5.54E-01 | -0.00023 | 0.00027 | 3.99E-01 | 0.00180  | 0.00095 | 5.94E-02 | -0.00023 | 0.00027 | 4.03E-01 | 0.00165  | 0.00096 | 8.56E-02 |
| cg06982745 | 18 | ENSG00000198246 | -0.00094 | 0.00112 | 4.00E-01 | -0.00306 | 0.00162 | 5.82E-02 | -0.00292 | 0.00222 | 1.88E-01 | 0.00066  | 0.00089 | 4.58E-01 | 0.00054  | 0.00239 | 8.22E-01 |
| cg09108394 | 15 | ENSG00000103356 | -0.00229 | 0.00328 | 4.84E-01 | 0.00487  | 0.00735 | 5.08E-01 | -0.00037 | 0.01157 | 9.74E-01 | -0.00514 | 0.00406 | 2.05E-01 | 0.00206  | 0.01289 | 8.73E-01 |
| cg06982745 | 18 | ENSG00000156521 | -0.00067 | 0.00081 | 4.04E-01 | 0.00197  | 0.00266 | 4.60E-01 | -0.00018 | 0.00235 | 9.39E-01 | -0.00094 | 0.00097 | 3.34E-01 | -0.00194 | 0.00263 | 4.60E-01 |
| cg20102034 | 37 | ENSG00000115318 | 0.00473  | 0.00367 | 1.97E-01 | 0.00604  | 0.00854 | 4.80E-01 | 0.00751  | 0.01192 | 5.29E-01 | 0.00497  | 0.00469 | 2.89E-01 | -0.00132 | 0.01121 | 9.06E-01 |
| cg10034572 | 8  | ENSG00000123636 | -0.00020 | 0.00192 | 9.18E-01 | 0.00156  | 0.00275 | 5.70E-01 | -0.00549 | 0.00350 | 1.17E-01 | 0.00280  | 0.00185 | 1.30E-01 | -0.00303 | 0.00365 | 4.07E-01 |
| cg16734845 | 25 | ENSG00000171766 | -0.00109 | 0.00104 | 2.96E-01 | -0.00121 | 0.00156 | 4.39E-01 | -0.00150 | 0.00211 | 4.77E-01 | -0.00417 | 0.00343 | 2.24E-01 | 0.00088  | 0.00220 | 6.88E-01 |
| cg25884324 | 20 | ENSG00000228998 | 0.00092  | 0.00102 | 3.71E-01 | 0.00161  | 0.00080 | 4.52E-02 | -0.00491 | 0.00331 | 1.38E-01 | 0.00330  | 0.00170 | 5.27E-02 | -0.00003 | 0.00111 | 9.77E-01 |
| cg20066227 | 9  | ENSG00000026025 | 0.00007  | 0.00033 | 8.41E-01 | -0.00092 | 0.00084 | 2.76E-01 | -0.00040 | 0.00106 | 7.04E-01 | 0.00019  | 0.00041 | 6.43E-01 | 0.00098  | 0.00093 | 2.90E-01 |
| cg05946118 | 12 | ENSG00000153048 | -0.00153 | 0.00319 | 6.31E-01 | -0.01061 | 0.00601 | 7.75E-02 | -0.00487 | 0.00861 | 5.72E-01 | 0.00180  | 0.00266 | 4.99E-01 | 0.00298  | 0.00899 | 7.40E-01 |
| cg27158523 | 11 | ENSG00000131023 | -0.00017 | 0.00044 | 6.90E-01 | -0.00004 | 0.00061 | 9.47E-01 | 0.00098  | 0.00089 | 2.73E-01 | -0.00007 | 0.00027 | 8.01E-01 | -0.00230 | 0.00106 | 3.09E-02 |
| cg20066227 | 9  | ENSG00000148481 | -0.00021 | 0.00107 | 8.48E-01 | 0.00242  | 0.00265 | 3.62E-01 | -0.00094 | 0.00313 | 7.64E-01 | -0.00080 | 0.00137 | 5.61E-01 | -0.00002 | 0.00325 | 9.95E-01 |
| cg07148038 | 89 | ENSG00000204438 | 0.00239  | 0.00139 | 8.59E-02 | 0.00298  | 0.00160 | 6.20E-02 | -0.00254 | 0.00628 | 6.86E-01 | 0.00062  | 0.00335 | 8.54E-01 | 0.00777  | 0.01016 | 4.45E-01 |
| cg19734370 | 32 | ENSG00000226137 | -0.00013 | 0.00011 | 2.39E-01 | -0.00017 | 0.00012 | 1.48E-01 | 0.00007  | 0.00027 | 7.88E-01 | 0.00108  | 0.00169 | 5.20E-01 | -0.00492 | 0.00756 | 5.15E-01 |
| cg11749902 | 11 | ENSG00000147536 | -0.00114 | 0.00294 | 7.00E-01 | 0.00573  | 0.00756 | 4.48E-01 | 0.00195  | 0.00323 | 5.47E-01 | -0.00616 | 0.00404 | 1.27E-01 | -0.01050 | 0.01164 | 3.67E-01 |
| cg20939319 | 10 | ENSG00000165392 | -0.00085 | 0.00296 | 7.73E-01 | -0.00646 | 0.00567 | 2.55E-01 | -0.00501 | 0.00867 | 5.63E-01 | 0.00161  | 0.00413 | 6.97E-01 | 0.00682  | 0.00951 | 4.73E-01 |
| cg25884324 | 20 | ENSG00000166965 | 0.00047  | 0.00055 | 3.88E-01 | 0.00170  | 0.00055 | 1.95E-03 | 0.00025  | 0.00081 | 7.59E-01 | -0.00042 | 0.00034 | 2.19E-01 | 0.00049  | 0.00073 | 5.03E-01 |
| cg22127773 | 80 | ENSG00000181284 | 0.00052  | 0.00031 | 9.88E-02 | 0.00117  | 0.00071 | 1.00E-01 | 0.00057  | 0.00047 | 2.26E-01 | 0.00021  | 0.00070 | 7.69E-01 | -0.00002 | 0.00077 | 9.84E-01 |
| cg21614201 | 13 | ENSG00000150961 | -0.00098 | 0.00192 | 6.10E-01 | -0.00672 | 0.00272 | 1.34E-02 | -0.00116 | 0.00275 | 6.72E-01 | 0.00013  | 0.00121 | 9.12E-01 | 0.00456  | 0.00356 | 2.00E-01 |
| cg27158523 | 11 | ENSG00000111962 | -0.00019 | 0.00053 | 7.23E-01 | -0.00146 | 0.00069 | 3.52E-02 | 0.00051  | 0.00101 | 6.15E-01 | 0.00042  | 0.00027 | 1.25E-01 | -0.00051 | 0.00121 | 6.72E-01 |

|            |    |                 |          |         |          |          |         |          |          |         |          |          |         |          |          |         |          |
|------------|----|-----------------|----------|---------|----------|----------|---------|----------|----------|---------|----------|----------|---------|----------|----------|---------|----------|
| cg19734370 | 32 | ENSG00000141577 | 0.00054  | 0.00047 | 2.49E-01 | -0.00009 | 0.00026 | 7.33E-01 | 0.00178  | 0.00065 | 6.47E-03 | 0.00086  | 0.00037 | 1.85E-02 | -0.00102 | 0.00127 | 4.20E-01 |
| cg23396786 | 18 | ENSG00000144048 | 0.00115  | 0.00150 | 4.46E-01 | -0.00052 | 0.00439 | 9.05E-01 | 0.00642  | 0.00560 | 2.52E-01 | 0.00121  | 0.00173 | 4.87E-01 | -0.00275 | 0.00622 | 6.58E-01 |
| cg16734845 | 25 | ENSG00000140259 | -0.00210 | 0.00212 | 3.21E-01 | -0.00054 | 0.00389 | 8.89E-01 | -0.00890 | 0.00444 | 4.50E-02 | -0.00105 | 0.00266 | 6.92E-01 | 0.00484  | 0.00787 | 5.39E-01 |
| cg20066227 | 9  | ENSG00000229124 | 0.00056  | 0.00431 | 8.97E-01 | 0.01083  | 0.00529 | 4.05E-02 | -0.00570 | 0.00678 | 4.01E-01 | -0.00517 | 0.00253 | 4.08E-02 | 0.00425  | 0.00706 | 5.48E-01 |
| cg20939319 | 10 | ENSG00000104660 | -0.00013 | 0.00054 | 8.10E-01 | -0.00005 | 0.00113 | 9.66E-01 | -0.00120 | 0.00208 | 5.63E-01 | -0.00020 | 0.00068 | 7.64E-01 | 0.00116  | 0.00192 | 5.47E-01 |
| cg03077331 | 45 | ENSG00000176845 | 0.00053  | 0.00039 | 1.81E-01 | 0.00189  | 0.00091 | 3.76E-02 | 0.00030  | 0.00036 | 4.04E-01 | -0.00073 | 0.00169 | 6.66E-01 | 0.00205  | 0.01052 | 8.45E-01 |
| cg02137691 | 31 | ENSG00000159733 | 0.00150  | 0.00134 | 2.63E-01 | 0.02118  | 0.00999 | 3.39E-02 | 0.01339  | 0.01102 | 2.24E-01 | 0.00090  | 0.00069 | 1.91E-01 | 0.00105  | 0.00136 | 4.41E-01 |
| cg06218079 | 42 | ENSG00000175711 | -0.00054 | 0.00042 | 1.96E-01 | 0.00006  | 0.00066 | 9.25E-01 | 0.00037  | 0.00063 | 5.55E-01 | -0.00054 | 0.00014 | 1.37E-04 | -0.00214 | 0.00068 | 1.62E-03 |
| cg07148038 | 89 | ENSG00000227507 | -0.00371 | 0.00221 | 9.27E-02 | -0.00263 | 0.00414 | 5.25E-01 | 0.00030  | 0.00213 | 8.87E-01 | -0.00497 | 0.00115 | 1.41E-05 | -0.01626 | 0.00724 | 2.47E-02 |
| cg07160694 | 13 | ENSG00000175985 | 0.00008  | 0.00018 | 6.36E-01 | 0.00040  | 0.00053 | 4.53E-01 | -0.00001 | 0.00065 | 9.87E-01 | 0.00012  | 0.00020 | 5.46E-01 | -0.00065 | 0.00063 | 2.99E-01 |
| cg02206852 | 52 | ENSG00000109118 | -0.00779 | 0.00554 | 1.59E-01 | 0.00356  | 0.00162 | 2.85E-02 | -0.00977 | 0.00758 | 1.98E-01 | -0.00738 | 0.00353 | 3.66E-02 | -0.02333 | 0.00712 | 1.05E-03 |
| cg21614201 | 13 | ENSG00000145390 | 0.00069  | 0.00147 | 6.40E-01 | -0.00462 | 0.00486 | 3.42E-01 | 0.00273  | 0.00454 | 5.47E-01 | 0.00093  | 0.00170 | 5.85E-01 | 0.00210  | 0.00586 | 7.20E-01 |
| cg25556432 | 15 | ENSG00000132329 | 0.00509  | 0.00862 | 5.55E-01 | -0.01241 | 0.01049 | 2.37E-01 | 0.00505  | 0.01500 | 7.36E-01 | 0.00028  | 0.00439 | 9.49E-01 | 0.03961  | 0.01508 | 8.64E-03 |
| cg06218079 | 42 | ENSG00000187531 | -0.00103 | 0.00080 | 1.98E-01 | 0.00036  | 0.00072 | 6.14E-01 | 0.00063  | 0.00087 | 4.73E-01 | -0.00171 | 0.00029 | 6.01E-09 | -0.00356 | 0.00102 | 4.78E-04 |
| cg05304461 | 26 | ENSG00000160049 | -0.00026 | 0.00026 | 3.22E-01 | -0.00019 | 0.00060 | 7.48E-01 | -0.00127 | 0.00103 | 2.17E-01 | -0.00017 | 0.00031 | 5.81E-01 | -0.00050 | 0.00131 | 7.05E-01 |
| cg02885771 | 11 | ENSG00000135521 | -0.00224 | 0.00749 | 7.65E-01 | -0.00319 | 0.00990 | 7.47E-01 | 0.01674  | 0.01397 | 2.31E-01 | -0.01545 | 0.00460 | 7.83E-04 | 0.00699  | 0.01200 | 5.60E-01 |
| cg02206852 | 52 | ENSG00000132581 | 0.00153  | 0.00109 | 1.62E-01 | -0.00002 | 0.00061 | 9.79E-01 | 0.00002  | 0.00199 | 9.92E-01 | 0.00339  | 0.00104 | 1.14E-03 | 0.00305  | 0.00197 | 1.21E-01 |
| cg02207312 | 37 | ENSG00000110107 | 0.00014  | 0.00012 | 2.29E-01 | 0.00006  | 0.00013 | 6.57E-01 | 0.00045  | 0.00083 | 5.87E-01 | 0.00063  | 0.00032 | 4.61E-02 | 0.00000  | 0.00078 | 9.95E-01 |
| cg07148038 | 89 | ENSG00000204498 | -0.00140 | 0.00084 | 9.63E-02 | -0.00208 | 0.00377 | 5.81E-01 | -0.00009 | 0.00157 | 9.52E-01 | -0.00183 | 0.00109 | 9.31E-02 | -0.00290 | 0.00346 | 4.01E-01 |
| cg27158523 | 11 | ENSG00000120256 | 0.00008  | 0.00030 | 7.83E-01 | -0.00024 | 0.00076 | 7.51E-01 | -0.00039 | 0.00126 | 7.59E-01 | 0.00011  | 0.00035 | 7.59E-01 | 0.00137  | 0.00140 | 3.29E-01 |
| cg03224276 | 13 | ENSG00000224470 | 0.00060  | 0.00140 | 6.67E-01 | 0.00623  | 0.00365 | 8.78E-02 | -0.00071 | 0.00412 | 8.64E-01 | -0.00075 | 0.00154 | 6.26E-01 | 0.00164  | 0.00332 | 6.21E-01 |
| cg02206852 | 52 | ENSG00000265625 | -0.00238 | 0.00173 | 1.68E-01 | -0.00357 | 0.00407 | 3.80E-01 | -0.00409 | 0.00429 | 3.40E-01 | -0.00214 | 0.00229 | 3.51E-01 | 0.00157  | 0.00579 | 7.87E-01 |
| cg09108394 | 15 | ENSG00000259806 | -0.00055 | 0.00106 | 6.08E-01 | 0.00071  | 0.00284 | 8.03E-01 | -0.00317 | 0.00360 | 3.78E-01 | -0.00037 | 0.00126 | 7.67E-01 | -0.00188 | 0.00460 | 6.82E-01 |
| cg27158523 | 11 | ENSG00000055208 | -0.00001 | 0.00005 | 8.32E-01 | -0.00010 | 0.00012 | 4.04E-01 | 0.00002  | 0.00021 | 9.28E-01 | 0.00000  | 0.00006 | 9.91E-01 | 0.00008  | 0.00021 | 6.94E-01 |
| cg03224276 | 13 | ENSG00000118557 | 0.00035  | 0.00096 | 7.14E-01 | -0.00397 | 0.00321 | 2.16E-01 | 0.00013  | 0.00308 | 9.68E-01 | 0.00064  | 0.00117 | 5.83E-01 | 0.00175  | 0.00247 | 4.79E-01 |
| cg07957088 | 43 | ENSG00000101188 | -0.00282 | 0.00228 | 2.17E-01 | -0.00118 | 0.00620 | 8.50E-01 | 0.00674  | 0.00811 | 4.06E-01 | -0.00291 | 0.00278 | 2.95E-01 | -0.01091 | 0.00679 | 1.08E-01 |
| cg16734845 | 25 | ENSG00000205771 | 0.00029  | 0.00032 | 3.74E-01 | 0.00055  | 0.00054 | 3.02E-01 | -0.00052 | 0.00061 | 3.92E-01 | 0.00067  | 0.00053 | 2.07E-01 | -0.00383 | 0.00619 | 5.36E-01 |
| cg09108394 | 15 | ENSG00000103404 | 0.00146  | 0.00299 | 6.27E-01 | -0.00118 | 0.00485 | 8.08E-01 | -0.00150 | 0.00663 | 8.21E-01 | 0.00065  | 0.00364 | 8.58E-01 | 0.01758  | 0.00902 | 5.12E-02 |
| cg23396786 | 18 | ENSG00000135631 | -0.00234 | 0.00366 | 5.22E-01 | -0.00316 | 0.00926 | 7.32E-01 | -0.00278 | 0.01303 | 8.31E-01 | -0.00012 | 0.00444 | 9.78E-01 | -0.01833 | 0.01262 | 1.46E-01 |
| cg27158523 | 11 | ENSG00000120265 | -0.00002 | 0.00010 | 8.63E-01 | 0.00017  | 0.00014 | 2.16E-01 | -0.00017 | 0.00024 | 4.70E-01 | 0.00001  | 0.00008 | 9.43E-01 | -0.00045 | 0.00028 | 1.08E-01 |
| cg02137691 | 31 | ENSG00000178222 | -0.00044 | 0.00044 | 3.09E-01 | -0.00076 | 0.00168 | 6.54E-01 | -0.00012 | 0.00203 | 9.53E-01 | -0.00027 | 0.00058 | 6.40E-01 | -0.00075 | 0.00078 | 3.39E-01 |
| cg16734845 | 25 | ENSG00000166762 | 0.00068  | 0.00078 | 3.83E-01 | 0.00051  | 0.00604 | 9.32E-01 | 0.00348  | 0.00810 | 6.68E-01 | 0.00108  | 0.00091 | 2.34E-01 | -0.00063 | 0.00157 | 6.90E-01 |
| cg07957088 | 43 | ENSG00000171700 | 0.00031  | 0.00025 | 2.23E-01 | 0.00016  | 0.00033 | 6.34E-01 | 0.00028  | 0.00050 | 5.75E-01 | 0.00089  | 0.00064 | 1.66E-01 | 0.00274  | 0.00526 | 6.03E-01 |
| cg25884324 | 20 | ENSG00000198901 | -0.00039 | 0.00056 | 4.84E-01 | -0.00183 | 0.00152 | 2.29E-01 | -0.00047 | 0.00113 | 6.77E-01 | -0.00034 | 0.00075 | 6.52E-01 | 0.00320  | 0.00248 | 1.98E-01 |
| cg02885771 | 11 | ENSG00000146416 | -0.00048 | 0.00320 | 8.81E-01 | 0.00924  | 0.00655 | 1.58E-01 | -0.00327 | 0.00805 | 6.85E-01 | -0.00440 | 0.00420 | 2.95E-01 | 0.00093  | 0.00861 | 9.14E-01 |
| cg02885771 | 11 | ENSG00000118495 | -0.00031 | 0.00209 | 8.81E-01 | 0.00457  | 0.00507 | 3.67E-01 | 0.00199  | 0.00699 | 7.76E-01 | -0.00226 | 0.00263 | 3.90E-01 | 0.00141  | 0.00623 | 8.21E-01 |
| cg18387671 | 42 | ENSG00000007202 | -0.00005 | 0.00004 | 2.32E-01 | -0.00008 | 0.00009 | 3.42E-01 | -0.00007 | 0.00018 | 6.79E-01 | -0.00004 | 0.00006 | 5.24E-01 | -0.00006 | 0.00015 | 6.85E-01 |
| cg25884324 | 20 | ENSG00000140548 | 0.00027  | 0.00039 | 4.88E-01 | 0.00008  | 0.00049 | 8.63E-01 | 0.00047  | 0.00071 | 5.10E-01 | -0.00036 | 0.00025 | 1.52E-01 | 0.00125  | 0.00053 | 1.70E-02 |
| cg20102034 | 37 | ENSG00000115325 | -0.00147 | 0.00131 | 2.64E-01 | -0.00476 | 0.00327 | 1.45E-01 | -0.00560 | 0.00359 | 1.19E-01 | -0.00026 | 0.00120 | 8.28E-01 | 0.00062  | 0.00394 | 8.75E-01 |
| cg25556432 | 15 | ENSG00000132326 | -0.00102 | 0.00227 | 6.53E-01 | -0.00423 | 0.00534 | 4.28E-01 | -0.00405 | 0.00744 | 5.86E-01 | -0.00138 | 0.00249 | 5.79E-01 | 0.01153  | 0.00772 | 1.35E-01 |
| cg11749902 | 11 | ENSG00000029534 | 0.00009  | 0.00066 | 8.95E-01 | -0.00100 | 0.00187 | 5.94E-01 | 0.00038  | 0.00282 | 8.93E-01 | -0.00008 | 0.00077 | 9.16E-01 | 0.00345  | 0.00245 | 1.60E-01 |
| cg09108394 | 15 | ENSG00000168434 | -0.00345 | 0.00778 | 6.57E-01 | -0.00304 | 0.00745 | 6.83E-01 | -0.00888 | 0.01185 | 4.54E-01 | 0.01197  | 0.00491 | 1.48E-02 | -0.02541 | 0.01280 | 4.72E-02 |

|            |    |                 |          |         |          |          |         |          |          |         |          |          |         |          |          |         |          |
|------------|----|-----------------|----------|---------|----------|----------|---------|----------|----------|---------|----------|----------|---------|----------|----------|---------|----------|
| cg21614201 | 13 | ENSG00000138735 | 0.00016  | 0.00054 | 7.61E-01 | -0.00098 | 0.00086 | 2.56E-01 | 0.00023  | 0.00097 | 8.08E-01 | -0.00016 | 0.00037 | 6.72E-01 | 0.00215  | 0.00100 | 3.10E-02 |
| cg12064372 | 10 | ENSG00000139146 | 0.00001  | 0.00048 | 9.90E-01 | 0.00003  | 0.00062 | 9.63E-01 | -0.00191 | 0.00111 | 8.45E-02 | 0.00027  | 0.00042 | 5.23E-01 | 0.00196  | 0.00158 | 2.15E-01 |
| cg20102034 | 37 | ENSG00000204843 | 0.00024  | 0.00021 | 2.68E-01 | 0.00032  | 0.00036 | 3.81E-01 | 0.00020  | 0.00050 | 6.84E-01 | 0.00026  | 0.00032 | 4.18E-01 | -0.00314 | 0.00225 | 1.63E-01 |
| cg05946118 | 12 | ENSG00000260979 | -0.00056 | 0.00261 | 8.29E-01 | -0.00463 | 0.00342 | 1.76E-01 | -0.00012 | 0.00453 | 9.80E-01 | -0.00258 | 0.00228 | 2.58E-01 | 0.01051  | 0.00544 | 5.34E-02 |
| cg06218079 | 42 | ENSG00000169660 | -0.00195 | 0.00166 | 2.39E-01 | 0.00041  | 0.00117 | 7.27E-01 | -0.00030 | 0.00141 | 8.34E-01 | -0.00490 | 0.00093 | 1.42E-07 | -0.00417 | 0.00422 | 3.23E-01 |
| cg18387671 | 42 | ENSG00000132589 | -0.00008 | 0.00007 | 2.40E-01 | -0.00023 | 0.00059 | 6.96E-01 | 0.00144  | 0.00091 | 1.13E-01 | -0.00010 | 0.00006 | 6.82E-02 | -0.00001 | 0.00015 | 9.38E-01 |
| cg05304461 | 26 | ENSG00000162490 | 0.00027  | 0.00031 | 3.88E-01 | -0.00009 | 0.00023 | 6.90E-01 | -0.00014 | 0.00041 | 7.26E-01 | 0.00001  | 0.00021 | 9.78E-01 | 0.00148  | 0.00039 | 1.48E-04 |
| cg05946118 | 12 | ENSG00000260276 | 0.00057  | 0.00286 | 8.42E-01 | -0.00793 | 0.00540 | 1.42E-01 | 0.00865  | 0.00750 | 2.49E-01 | 0.00166  | 0.00265 | 5.30E-01 | 0.00269  | 0.00785 | 7.32E-01 |
| cg05946118 | 12 | ENSG00000183044 | 0.00113  | 0.00572 | 8.44E-01 | -0.00711 | 0.00654 | 2.77E-01 | -0.00521 | 0.01067 | 6.25E-01 | 0.01101  | 0.00327 | 7.66E-04 | -0.00098 | 0.01058 | 9.26E-01 |
| cg09108394 | 15 | ENSG00000083093 | 0.00078  | 0.00186 | 6.76E-01 | 0.00072  | 0.00393 | 8.55E-01 | -0.00233 | 0.00465 | 6.16E-01 | 0.00021  | 0.00268 | 9.38E-01 | 0.00654  | 0.00504 | 1.95E-01 |
| cg06218079 | 42 | ENSG00000169738 | 0.00070  | 0.00060 | 2.43E-01 | -0.00030 | 0.00029 | 2.97E-01 | 0.00007  | 0.00029 | 8.17E-01 | 0.00252  | 0.00093 | 6.77E-03 | 0.00834  | 0.00323 | 9.85E-03 |
| cg19734370 | 32 | ENSG00000171246 | -0.00261 | 0.00262 | 3.19E-01 | 0.00117  | 0.00133 | 3.79E-01 | -0.00752 | 0.00258 | 3.61E-03 | -0.00555 | 0.00193 | 4.12E-03 | 0.00459  | 0.00576 | 4.26E-01 |
| cg25556432 | 15 | ENSG00000222020 | 0.00029  | 0.00070 | 6.82E-01 | -0.00849 | 0.01133 | 4.54E-01 | 0.01025  | 0.01438 | 4.76E-01 | 0.00003  | 0.00074 | 9.63E-01 | 0.00261  | 0.00220 | 2.35E-01 |
| cg06218079 | 42 | ENSG00000176845 | 0.00094  | 0.00082 | 2.48E-01 | 0.00013  | 0.00124 | 9.15E-01 | 0.00101  | 0.00119 | 3.95E-01 | 0.00219  | 0.00081 | 7.01E-03 | -0.00380 | 0.00306 | 2.15E-01 |
| cg07148038 | 89 | ENSG00000204394 | -0.00151 | 0.00096 | 1.17E-01 | -0.00614 | 0.00438 | 1.61E-01 | 0.00271  | 0.00662 | 6.83E-01 | -0.00372 | 0.00217 | 8.63E-02 | -0.00076 | 0.00105 | 4.69E-01 |
| cg25556432 | 15 | ENSG00000065802 | 0.00040  | 0.00105 | 7.04E-01 | 0.00155  | 0.00169 | 3.57E-01 | 0.00155  | 0.00252 | 5.38E-01 | -0.00126 | 0.00075 | 9.04E-02 | 0.00256  | 0.00224 | 2.52E-01 |
| cg20102034 | 37 | ENSG00000204792 | -0.00086 | 0.00081 | 2.86E-01 | 0.00228  | 0.00613 | 7.10E-01 | 0.00125  | 0.00894 | 8.89E-01 | -0.00447 | 0.00363 | 2.17E-01 | -0.00074 | 0.00084 | 3.75E-01 |
| cg05304461 | 26 | ENSG00000242349 | -0.00003 | 0.00004 | 4.08E-01 | 0.00000  | 0.00007 | 9.63E-01 | 0.00052  | 0.00116 | 6.57E-01 | -0.00007 | 0.00006 | 2.65E-01 | -0.00002 | 0.00011 | 8.23E-01 |
| cg16734845 | 25 | ENSG00000229474 | 0.00080  | 0.00101 | 4.25E-01 | -0.00026 | 0.00107 | 8.07E-01 | 0.00272  | 0.00140 | 5.24E-02 | 0.00044  | 0.00305 | 8.85E-01 | -0.00620 | 0.00784 | 4.29E-01 |
| cg25556432 | 15 | ENSG00000132323 | 0.00218  | 0.00587 | 7.10E-01 | 0.01174  | 0.00954 | 2.19E-01 | -0.00869 | 0.01181 | 4.62E-01 | -0.00426 | 0.00349 | 2.22E-01 | 0.01924  | 0.01260 | 1.27E-01 |
| cg06218079 | 42 | ENSG00000169710 | 0.00125  | 0.00109 | 2.54E-01 | 0.00192  | 0.00079 | 1.47E-02 | -0.00080 | 0.00094 | 3.97E-01 | 0.00023  | 0.00058 | 6.85E-01 | 0.01248  | 0.00391 | 1.42E-03 |
| cg20102034 | 37 | ENSG00000159239 | 0.00175  | 0.00165 | 2.90E-01 | 0.00175  | 0.00208 | 4.00E-01 | 0.00127  | 0.00247 | 6.07E-01 | 0.00684  | 0.00451 | 1.30E-01 | -0.01037 | 0.00838 | 2.16E-01 |
| cg23396786 | 18 | ENSG00000135617 | -0.00081 | 0.00152 | 5.96E-01 | 0.00292  | 0.00208 | 1.60E-01 | -0.00403 | 0.00357 | 2.58E-01 | -0.00093 | 0.00127 | 4.65E-01 | -0.00453 | 0.00342 | 1.85E-01 |
| cg25556432 | 15 | ENSG00000168427 | 0.00143  | 0.00396 | 7.17E-01 | 0.01224  | 0.01084 | 2.59E-01 | -0.00211 | 0.01588 | 8.94E-01 | 0.00020  | 0.00458 | 9.65E-01 | -0.00394 | 0.01693 | 8.16E-01 |
| cg02885771 | 11 | ENSG00000112419 | -0.00019 | 0.00732 | 9.80E-01 | -0.02069 | 0.00870 | 1.74E-02 | 0.01653  | 0.01102 | 1.34E-01 | 0.00646  | 0.00368 | 7.91E-02 | -0.00312 | 0.01025 | 7.61E-01 |
| cg05946118 | 12 | ENSG00000187555 | 0.00036  | 0.00309 | 9.06E-01 | -0.00335 | 0.00427 | 4.32E-01 | 0.00522  | 0.00607 | 3.89E-01 | 0.00428  | 0.00300 | 1.54E-01 | -0.01074 | 0.00783 | 1.71E-01 |
| cg11749902 | 11 | ENSG00000165061 | -0.00006 | 0.00399 | 9.89E-01 | 0.01571  | 0.01175 | 1.81E-01 | -0.00044 | 0.01193 | 9.70E-01 | -0.00185 | 0.00468 | 6.93E-01 | -0.01029 | 0.01863 | 5.81E-01 |
| cg21614201 | 13 | ENSG00000164096 | -0.00036 | 0.00177 | 8.41E-01 | 0.00171  | 0.00098 | 8.01E-02 | -0.00989 | 0.00562 | 7.81E-02 | -0.00090 | 0.00214 | 6.73E-01 | -0.00185 | 0.00689 | 7.89E-01 |
| cg06218079 | 42 | ENSG00000197063 | 0.00054  | 0.00048 | 2.61E-01 | -0.00028 | 0.00087 | 7.49E-01 | 0.00093  | 0.00132 | 4.81E-01 | 0.00077  | 0.00066 | 2.46E-01 | 0.00349  | 0.00292 | 2.32E-01 |
| cg22127773 | 80 | ENSG00000185156 | -0.00018 | 0.00012 | 1.38E-01 | 0.00094  | 0.00134 | 4.83E-01 | -0.00061 | 0.00039 | 1.20E-01 | -0.00014 | 0.00013 | 2.72E-01 | -0.00016 | 0.00065 | 8.05E-01 |
| cg03077331 | 45 | ENSG00000175711 | -0.00447 | 0.00385 | 2.46E-01 | 0.00424  | 0.01030 | 6.81E-01 | -0.00873 | 0.00508 | 8.56E-02 | 0.00040  | 0.00122 | 7.40E-01 | -0.01219 | 0.00515 | 1.79E-02 |
| cg07148038 | 89 | ENSG00000204439 | 0.00479  | 0.00312 | 1.25E-01 | 0.00549  | 0.00446 | 2.18E-01 | 0.00274  | 0.00854 | 7.49E-01 | 0.01270  | 0.00467 | 6.54E-03 | 0.00023  | 0.00226 | 9.19E-01 |
| cg07148038 | 89 | ENSG00000204308 | -0.00585 | 0.00381 | 1.25E-01 | 0.00233  | 0.00155 | 1.34E-01 | 0.00028  | 0.00181 | 8.77E-01 | -0.00893 | 0.00353 | 1.13E-02 | -0.02415 | 0.00559 | 1.56E-05 |
| cg02206852 | 52 | ENSG00000179761 | -0.00558 | 0.00450 | 2.15E-01 | 0.00079  | 0.00075 | 2.95E-01 | -0.00197 | 0.00692 | 7.76E-01 | 0.00258  | 0.00253 | 3.09E-01 | -0.03428 | 0.00710 | 1.38E-06 |
| cg06982745 | 18 | ENSG00000148730 | -0.00078 | 0.00159 | 6.24E-01 | 0.00419  | 0.00216 | 5.28E-02 | -0.00174 | 0.00187 | 3.54E-01 | -0.00062 | 0.00110 | 5.72E-01 | -0.00541 | 0.00246 | 2.80E-02 |
| cg16734845 | 25 | ENSG00000179523 | 0.00074  | 0.00099 | 4.50E-01 | 0.00397  | 0.00430 | 3.56E-01 | -0.01005 | 0.00635 | 1.13E-01 | 0.00152  | 0.00102 | 1.36E-01 | 0.00023  | 0.00093 | 8.07E-01 |
| cg03703840 | 14 | ENSG00000020922 | 0.00001  | 0.00005 | 8.05E-01 | -0.00003 | 0.00014 | 8.37E-01 | -0.00003 | 0.00018 | 8.70E-01 | 0.00005  | 0.00007 | 5.10E-01 | -0.00004 | 0.00012 | 7.70E-01 |
| cg03224276 | 13 | ENSG00000140830 | 0.00018  | 0.00118 | 8.76E-01 | -0.00358 | 0.00351 | 3.08E-01 | -0.00359 | 0.00392 | 3.60E-01 | 0.00078  | 0.00148 | 5.98E-01 | 0.00253  | 0.00291 | 3.84E-01 |
| cg06982745 | 18 | ENSG00000197604 | 0.00083  | 0.00176 | 6.35E-01 | 0.00615  | 0.00223 | 5.77E-03 | -0.00067 | 0.00312 | 8.31E-01 | 0.00008  | 0.00021 | 6.92E-01 | -0.00379 | 0.00343 | 2.69E-01 |
| cg02137691 | 31 | ENSG00000127419 | -0.00605 | 0.00674 | 3.69E-01 | 0.01571  | 0.00952 | 9.89E-02 | -0.01607 | 0.01211 | 1.84E-01 | -0.01170 | 0.00421 | 5.42E-03 | -0.01136 | 0.01017 | 2.64E-01 |
| cg25884324 | 20 | ENSG00000182768 | -0.00071 | 0.00126 | 5.72E-01 | 0.00100  | 0.00313 | 7.50E-01 | -0.00195 | 0.00449 | 6.64E-01 | -0.00113 | 0.00154 | 4.63E-01 | 0.00041  | 0.00414 | 9.21E-01 |
| cg02137691 | 31 | ENSG00000214367 | -0.00165 | 0.00184 | 3.69E-01 | -0.00115 | 0.00175 | 5.10E-01 | 0.00058  | 0.00193 | 7.65E-01 | -0.00937 | 0.00386 | 1.53E-02 | 0.00113  | 0.00528 | 8.31E-01 |

|            |    |                 |          |         |          |          |         |          |          |         |          |          |         |          |          |         |          |
|------------|----|-----------------|----------|---------|----------|----------|---------|----------|----------|---------|----------|----------|---------|----------|----------|---------|----------|
| cg02206852 | 52 | ENSG00000109113 | -0.00118 | 0.00096 | 2.23E-01 | -0.00876 | 0.00476 | 6.57E-02 | -0.00131 | 0.00258 | 6.13E-01 | -0.00059 | 0.00120 | 6.23E-01 | -0.00146 | 0.00232 | 5.29E-01 |
| cg07148038 | 89 | ENSG00000204261 | -0.00240 | 0.00159 | 1.31E-01 | -0.00339 | 0.00237 | 1.52E-01 | -0.00406 | 0.00274 | 1.38E-01 | 0.00042  | 0.00094 | 6.57E-01 | -0.00537 | 0.00280 | 5.51E-02 |
| cg18387671 | 42 | ENSG00000265205 | -0.00008 | 0.00008 | 2.78E-01 | 0.00079  | 0.00093 | 3.93E-01 | -0.00054 | 0.00057 | 3.49E-01 | -0.00009 | 0.00008 | 2.70E-01 | 0.00078  | 0.00103 | 4.50E-01 |
| cg03703840 | 14 | ENSG00000180773 | 0.00005  | 0.00025 | 8.49E-01 | -0.00058 | 0.00089 | 5.16E-01 | -0.00066 | 0.00113 | 5.60E-01 | 0.00019  | 0.00028 | 5.00E-01 | -0.00035 | 0.00093 | 7.02E-01 |
| cg07148038 | 89 | ENSG00000228727 | 0.00302  | 0.00202 | 1.34E-01 | 0.00155  | 0.00135 | 2.51E-01 | 0.00661  | 0.00577 | 2.52E-01 | 0.00741  | 0.00228 | 1.15E-03 | -0.00135 | 0.00283 | 6.33E-01 |
| cg06218079 | 42 | ENSG00000178927 | 0.00035  | 0.00032 | 2.84E-01 | -0.00017 | 0.00009 | 7.55E-02 | 0.00004  | 0.00011 | 6.73E-01 | 0.00411  | 0.00089 | 3.51E-06 | -0.00523 | 0.00477 | 2.72E-01 |
| cg05946118 | 12 | ENSG00000182831 | 0.00001  | 0.00151 | 9.95E-01 | -0.00480 | 0.00334 | 1.51E-01 | 0.00220  | 0.00517 | 6.71E-01 | 0.00140  | 0.00190 | 4.63E-01 | -0.00103 | 0.00549 | 8.52E-01 |
| cg07957088 | 43 | ENSG00000125520 | 0.00069  | 0.00063 | 2.78E-01 | 0.00128  | 0.00139 | 3.59E-01 | 0.00311  | 0.00201 | 1.21E-01 | -0.00003 | 0.00049 | 9.47E-01 | 0.00197  | 0.00185 | 2.86E-01 |
| cg06982745 | 18 | ENSG00000107719 | 0.00025  | 0.00057 | 6.65E-01 | -0.00040 | 0.00170 | 8.14E-01 | -0.00098 | 0.00162 | 5.45E-01 | 0.00048  | 0.00070 | 4.95E-01 | 0.00097  | 0.00182 | 5.95E-01 |
| cg20102034 | 37 | ENSG00000225439 | 0.00202  | 0.00206 | 3.26E-01 | 0.00514  | 0.00532 | 3.34E-01 | 0.00206  | 0.00299 | 4.91E-01 | -0.00198 | 0.00515 | 7.01E-01 | 0.00274  | 0.00441 | 5.35E-01 |
| cg25556432 | 15 | ENSG00000068024 | 0.00053  | 0.00219 | 8.08E-01 | 0.00151  | 0.00563 | 7.88E-01 | -0.00773 | 0.00586 | 1.88E-01 | 0.00206  | 0.00290 | 4.79E-01 | 0.00152  | 0.00591 | 7.97E-01 |
| cg02206852 | 52 | ENSG00000087095 | -0.00410 | 0.00345 | 2.34E-01 | 0.00524  | 0.00533 | 3.25E-01 | -0.00835 | 0.00533 | 1.17E-01 | -0.00289 | 0.00313 | 3.55E-01 | -0.01397 | 0.00701 | 4.62E-02 |
| cg22127773 | 80 | ENSG00000141504 | 0.00057  | 0.00040 | 1.52E-01 | 0.00099  | 0.00036 | 5.55E-03 | -0.00037 | 0.00061 | 5.38E-01 | 0.00020  | 0.00106 | 8.52E-01 | 0.00137  | 0.00097 | 1.58E-01 |
| cg20102034 | 37 | ENSG00000135637 | -0.00185 | 0.00191 | 3.32E-01 | -0.00359 | 0.00420 | 3.93E-01 | -0.00663 | 0.00531 | 2.12E-01 | 0.00014  | 0.00246 | 9.55E-01 | -0.00514 | 0.00740 | 4.87E-01 |
| cg07957088 | 43 | ENSG00000101190 | 0.00199  | 0.00188 | 2.89E-01 | 0.00618  | 0.00407 | 1.29E-01 | 0.00676  | 0.00482 | 1.60E-01 | 0.00002  | 0.00238 | 9.93E-01 | -0.00150 | 0.00478 | 7.54E-01 |
| cg25884324 | 20 | ENSG00000182511 | -0.00113 | 0.00230 | 6.24E-01 | 0.00607  | 0.00241 | 1.19E-02 | -0.00653 | 0.00297 | 2.79E-02 | -0.00112 | 0.00116 | 3.35E-01 | -0.00375 | 0.00269 | 1.64E-01 |
| cg23396786 | 18 | ENSG00000135632 | 0.00432  | 0.01111 | 6.97E-01 | -0.01816 | 0.01168 | 1.20E-01 | -0.00082 | 0.01921 | 9.66E-01 | 0.00115  | 0.00586 | 8.44E-01 | 0.04984  | 0.01917 | 9.32E-03 |
| cg25884324 | 20 | ENSG00000196547 | 0.00023  | 0.00048 | 6.28E-01 | 0.00254  | 0.00326 | 4.35E-01 | 0.00235  | 0.00284 | 4.08E-01 | 0.00029  | 0.00108 | 7.89E-01 | 0.00007  | 0.00055 | 8.96E-01 |
| cg19734370 | 32 | ENSG00000181045 | -0.00076 | 0.00088 | 3.92E-01 | 0.00008  | 0.00036 | 8.20E-01 | -0.00091 | 0.00072 | 2.07E-01 | -0.00449 | 0.00190 | 1.80E-02 | 0.00669  | 0.00477 | 1.60E-01 |
| cg07957088 | 43 | ENSG00000183260 | 0.00040  | 0.00038 | 2.93E-01 | 0.00228  | 0.00197 | 2.45E-01 | -0.00128 | 0.00288 | 6.57E-01 | 0.00078  | 0.00198 | 6.95E-01 | 0.00034  | 0.00040 | 3.96E-01 |
| cg02207312 | 37 | ENSG00000110077 | 0.00023  | 0.00024 | 3.46E-01 | -0.00076 | 0.00064 | 2.34E-01 | -0.00012 | 0.00032 | 7.08E-01 | 0.00043  | 0.00021 | 4.44E-02 | 0.00068  | 0.00030 | 2.33E-02 |
| cg25556432 | 15 | ENSG00000204104 | -0.00057 | 0.00315 | 8.57E-01 | 0.00284  | 0.01093 | 7.95E-01 | 0.00821  | 0.01300 | 5.28E-01 | -0.00161 | 0.00360 | 6.55E-01 | -0.00059 | 0.01039 | 9.55E-01 |
| cg25556432 | 15 | ENSG00000178752 | 0.00132  | 0.00736 | 8.58E-01 | 0.01338  | 0.00958 | 1.63E-01 | 0.01016  | 0.01140 | 3.73E-01 | 0.00314  | 0.00533 | 5.56E-01 | -0.02804 | 0.01275 | 2.79E-02 |
| cg09108394 | 15 | ENSG00000090905 | 0.00076  | 0.00435 | 8.60E-01 | -0.00164 | 0.00672 | 8.08E-01 | 0.01650  | 0.00917 | 7.19E-02 | -0.00459 | 0.00318 | 1.49E-01 | 0.00447  | 0.01086 | 6.81E-01 |
| cg06218079 | 42 | ENSG00000141556 | 0.00160  | 0.00157 | 3.08E-01 | 0.00108  | 0.00116 | 3.53E-01 | -0.00046 | 0.00138 | 7.41E-01 | 0.00479  | 0.00075 | 1.88E-10 | -0.00139 | 0.00408 | 7.33E-01 |
| cg03077331 | 45 | ENSG00000184551 | 0.00145  | 0.00136 | 2.88E-01 | 0.00104  | 0.00282 | 7.12E-01 | 0.00105  | 0.00114 | 3.56E-01 | -0.00043 | 0.00084 | 6.13E-01 | 0.00971  | 0.00353 | 5.96E-03 |
| cg02207312 | 37 | ENSG00000134825 | -0.00025 | 0.00027 | 3.50E-01 | 0.00013  | 0.00027 | 6.22E-01 | -0.00003 | 0.00084 | 9.72E-01 | -0.00071 | 0.00040 | 7.43E-02 | -0.00087 | 0.00078 | 2.63E-01 |
| cg05304461 | 26 | ENSG00000132879 | -0.00008 | 0.00012 | 5.00E-01 | -0.00060 | 0.00033 | 7.00E-02 | -0.00003 | 0.00048 | 9.42E-01 | 0.00001  | 0.00013 | 9.56E-01 | -0.00015 | 0.00049 | 7.61E-01 |
| cg02206852 | 52 | ENSG00000132589 | 0.00111  | 0.00097 | 2.51E-01 | 0.00492  | 0.00118 | 2.85E-05 | 0.00026  | 0.00074 | 7.20E-01 | -0.00067 | 0.00042 | 1.13E-01 | 0.00084  | 0.00083 | 3.11E-01 |
| cg09108394 | 15 | ENSG00000260751 | -0.00010 | 0.00064 | 8.76E-01 | -0.00435 | 0.00796 | 5.85E-01 | 0.00989  | 0.01093 | 3.66E-01 | -0.00009 | 0.00068 | 8.93E-01 | -0.00022 | 0.00188 | 9.07E-01 |
| cg19734370 | 32 | ENSG00000263069 | -0.00078 | 0.00095 | 4.11E-01 | 0.00146  | 0.00092 | 1.14E-01 | -0.00254 | 0.00086 | 2.98E-03 | -0.00102 | 0.00092 | 2.68E-01 | -0.00104 | 0.00162 | 5.22E-01 |
| cg05304461 | 26 | ENSG00000116649 | 0.00020  | 0.00030 | 5.08E-01 | -0.00056 | 0.00044 | 2.03E-01 | 0.00018  | 0.00074 | 8.11E-01 | 0.00045  | 0.00024 | 6.48E-02 | 0.00085  | 0.00071 | 2.31E-01 |
| cg03703840 | 14 | ENSG00000166002 | 0.00002  | 0.00031 | 9.46E-01 | -0.00043 | 0.00085 | 6.17E-01 | -0.00015 | 0.00105 | 8.87E-01 | -0.00014 | 0.00009 | 1.42E-01 | 0.00146  | 0.00081 | 7.25E-02 |
| cg22127773 | 80 | ENSG00000132507 | 0.00122  | 0.00089 | 1.69E-01 | 0.00189  | 0.00146 | 1.96E-01 | -0.00257 | 0.00302 | 3.95E-01 | 0.00040  | 0.00111 | 7.16E-01 | 0.00325  | 0.00168 | 5.27E-02 |
| cg09108394 | 15 | ENSG00000103353 | -0.00022 | 0.00178 | 9.03E-01 | -0.00120 | 0.00377 | 7.50E-01 | 0.00623  | 0.00573 | 2.77E-01 | -0.00149 | 0.00229 | 5.14E-01 | 0.00480  | 0.00658 | 4.65E-01 |
| cg02206852 | 52 | ENSG00000109079 | -0.00341 | 0.00304 | 2.62E-01 | -0.00595 | 0.00251 | 1.77E-02 | 0.02052  | 0.00968 | 3.40E-02 | -0.00156 | 0.00093 | 9.35E-02 | -0.01027 | 0.00333 | 2.03E-03 |
| cg23396786 | 18 | ENSG00000114956 | -0.00083 | 0.00270 | 7.58E-01 | 0.00386  | 0.00618 | 5.32E-01 | -0.00004 | 0.00722 | 9.95E-01 | -0.00220 | 0.00375 | 5.57E-01 | -0.00275 | 0.00685 | 6.89E-01 |
| cg16734845 | 25 | ENSG00000166763 | 0.00090  | 0.00149 | 5.48E-01 | 0.00006  | 0.00229 | 9.80E-01 | -0.00180 | 0.00243 | 4.60E-01 | 0.00396  | 0.00239 | 9.70E-02 | 0.00772  | 0.01030 | 4.53E-01 |
| cg02207312 | 37 | ENSG00000149485 | -0.00018 | 0.00020 | 3.73E-01 | -0.00087 | 0.00048 | 7.17E-02 | 0.00207  | 0.00080 | 9.55E-03 | -0.00009 | 0.00005 | 1.16E-01 | -0.00038 | 0.00011 | 8.02E-04 |
| cg16734845 | 25 | ENSG00000104131 | -0.00112 | 0.00190 | 5.56E-01 | -0.00594 | 0.00316 | 6.05E-02 | -0.00142 | 0.00312 | 6.49E-01 | -0.00078 | 0.00195 | 6.90E-01 | 0.00565  | 0.00420 | 1.78E-01 |
| cg25884324 | 20 | ENSG00000140564 | 0.00038  | 0.00098 | 6.98E-01 | 0.00018  | 0.00276 | 9.48E-01 | 0.00068  | 0.00336 | 8.40E-01 | 0.00082  | 0.00117 | 4.82E-01 | -0.00276 | 0.00311 | 3.74E-01 |
| cg25556432 | 15 | ENSG00000144485 | 0.00026  | 0.00306 | 9.33E-01 | -0.00304 | 0.00689 | 6.59E-01 | 0.00065  | 0.00863 | 9.40E-01 | 0.00296  | 0.00396 | 4.55E-01 | -0.01253 | 0.01086 | 2.48E-01 |

|            |    |                 |          |         |          |          |         |          |          |         |          |          |         |          |          |         |          |
|------------|----|-----------------|----------|---------|----------|----------|---------|----------|----------|---------|----------|----------|---------|----------|----------|---------|----------|
| cg22127773 | 80 | ENSG00000181222 | 0.00040  | 0.00030 | 1.75E-01 | 0.00008  | 0.00023 | 7.29E-01 | 0.00056  | 0.00052 | 2.82E-01 | 0.00103  | 0.00044 | 1.95E-02 | -0.00134 | 0.00172 | 4.36E-01 |
| cg07957088 | 43 | ENSG00000101216 | -0.00109 | 0.00111 | 3.26E-01 | -0.00376 | 0.00201 | 6.12E-02 | -0.00142 | 0.00306 | 6.43E-01 | 0.00082  | 0.00176 | 6.41E-01 | -0.00051 | 0.00274 | 8.52E-01 |
| cg23396786 | 18 | ENSG00000144040 | -0.00150 | 0.00537 | 7.81E-01 | -0.00851 | 0.01173 | 4.68E-01 | -0.01368 | 0.01872 | 4.65E-01 | 0.00080  | 0.00685 | 9.07E-01 | 0.01015  | 0.01778 | 5.68E-01 |
| cg07148038 | 89 | ENSG00000137310 | 0.00058  | 0.00041 | 1.59E-01 | -0.00033 | 0.00101 | 7.45E-01 | 0.00042  | 0.00146 | 7.71E-01 | 0.00088  | 0.00052 | 8.97E-02 | 0.00037  | 0.00116 | 7.47E-01 |
| cg03077331 | 45 | ENSG00000141551 | -0.00107 | 0.00106 | 3.15E-01 | -0.00048 | 0.00566 | 9.32E-01 | 0.00154  | 0.00221 | 4.86E-01 | -0.00136 | 0.00083 | 1.03E-01 | -0.00758 | 0.00469 | 1.06E-01 |
| cg06982745 | 18 | ENSG00000166224 | -0.00023 | 0.00087 | 7.90E-01 | -0.00060 | 0.00175 | 7.31E-01 | -0.00362 | 0.00342 | 2.90E-01 | -0.00048 | 0.00128 | 7.10E-01 | 0.00172  | 0.00187 | 3.56E-01 |
| cg05304461 | 26 | ENSG00000009724 | 0.00007  | 0.00012 | 5.52E-01 | -0.00019 | 0.00014 | 1.67E-01 | -0.00008 | 0.00026 | 7.48E-01 | 0.00013  | 0.00007 | 8.01E-02 | 0.00045  | 0.00020 | 2.21E-02 |
| cg09108394 | 15 | ENSG00000166851 | 0.00024  | 0.00530 | 9.63E-01 | 0.00374  | 0.00672 | 5.78E-01 | 0.00779  | 0.00888 | 3.80E-01 | 0.00373  | 0.00489 | 4.46E-01 | -0.02402 | 0.01115 | 3.11E-02 |
| cg25556432 | 15 | ENSG00000184182 | 0.00019  | 0.00437 | 9.66E-01 | -0.00140 | 0.01069 | 8.96E-01 | -0.00676 | 0.01537 | 6.60E-01 | -0.00107 | 0.00536 | 8.41E-01 | 0.02003  | 0.01507 | 1.84E-01 |
| cg23396786 | 18 | ENSG00000163013 | -0.00093 | 0.00389 | 8.10E-01 | -0.00455 | 0.01179 | 6.99E-01 | 0.01910  | 0.01574 | 2.25E-01 | -0.00320 | 0.00457 | 4.84E-01 | 0.00665  | 0.01190 | 5.76E-01 |
| cg19734370 | 32 | ENSG00000175866 | -0.00042 | 0.00056 | 4.56E-01 | -0.00039 | 0.00074 | 5.93E-01 | -0.00013 | 0.00157 | 9.34E-01 | -0.00046 | 0.00104 | 6.58E-01 | -0.00254 | 0.00434 | 5.58E-01 |
| cg19734370 | 32 | ENSG00000224877 | -0.00070 | 0.00095 | 4.58E-01 | -0.00176 | 0.00159 | 2.68E-01 | 0.00065  | 0.00290 | 8.23E-01 | -0.00003 | 0.00134 | 9.82E-01 | -0.00349 | 0.00487 | 4.74E-01 |
| cg18387671 | 42 | ENSG00000264608 | 0.00040  | 0.00042 | 3.50E-01 | 0.00095  | 0.00030 | 1.34E-03 | 0.00168  | 0.00112 | 1.36E-01 | -0.00012 | 0.00062 | 8.40E-01 | -0.00026 | 0.00035 | 4.54E-01 |
| cg02137691 | 31 | ENSG00000145214 | 0.00446  | 0.00624 | 4.75E-01 | -0.00497 | 0.00836 | 5.52E-01 | 0.01454  | 0.00883 | 9.96E-02 | 0.01414  | 0.00494 | 4.20E-03 | -0.00855 | 0.00804 | 2.87E-01 |
| cg06218079 | 42 | ENSG00000141552 | 0.00029  | 0.00031 | 3.57E-01 | 0.00019  | 0.00059 | 7.43E-01 | 0.00009  | 0.00067 | 8.98E-01 | 0.00044  | 0.00045 | 3.21E-01 | -0.00003 | 0.00214 | 9.90E-01 |
| cg19734370 | 32 | ENSG00000262877 | -0.00014 | 0.00020 | 4.74E-01 | -0.00142 | 0.00067 | 3.40E-02 | 0.00001  | 0.00015 | 9.28E-01 | -0.00032 | 0.00030 | 2.82E-01 | 0.00014  | 0.00028 | 6.09E-01 |
| cg25884324 | 20 | ENSG00000140577 | -0.00035 | 0.00120 | 7.67E-01 | 0.00164  | 0.00303 | 5.89E-01 | -0.00148 | 0.00418 | 7.22E-01 | 0.00001  | 0.00147 | 9.95E-01 | -0.00466 | 0.00368 | 2.05E-01 |
| cg16734845 | 25 | ENSG00000138606 | -0.00025 | 0.00052 | 6.23E-01 | -0.00055 | 0.00108 | 6.09E-01 | 0.00057  | 0.00152 | 7.10E-01 | -0.00036 | 0.00067 | 5.89E-01 | 0.00039  | 0.00211 | 8.54E-01 |
| cg16734845 | 25 | ENSG00000104133 | 0.00096  | 0.00197 | 6.25E-01 | -0.00475 | 0.00546 | 3.84E-01 | 0.00671  | 0.00612 | 2.74E-01 | 0.00088  | 0.00233 | 7.05E-01 | 0.00534  | 0.00900 | 5.53E-01 |
| cg25884324 | 20 | ENSG00000182054 | -0.00030 | 0.00110 | 7.82E-01 | 0.00265  | 0.00200 | 1.86E-01 | -0.00247 | 0.00239 | 3.02E-01 | -0.00137 | 0.00133 | 3.06E-01 | 0.00065  | 0.00267 | 8.08E-01 |
| cg03077331 | 45 | ENSG00000169683 | -0.00229 | 0.00245 | 3.49E-01 | 0.00943  | 0.01144 | 4.10E-01 | -0.00330 | 0.00388 | 3.95E-01 | -0.00056 | 0.00121 | 6.40E-01 | -0.01236 | 0.00626 | 4.85E-02 |
| cg06982745 | 18 | ENSG00000197467 | -0.00007 | 0.00046 | 8.73E-01 | 0.00139  | 0.00354 | 6.94E-01 | -0.00269 | 0.00283 | 3.41E-01 | 0.00012  | 0.00100 | 9.03E-01 | -0.00007 | 0.00053 | 8.97E-01 |
| cg22127773 | 80 | ENSG00000265749 | 0.00033  | 0.00026 | 1.97E-01 | 0.00023  | 0.00036 | 5.24E-01 | 0.00065  | 0.00083 | 4.34E-01 | 0.00039  | 0.00043 | 3.66E-01 | 0.00039  | 0.00146 | 7.91E-01 |
| cg07148038 | 89 | ENSG00000204267 | 0.00062  | 0.00046 | 1.78E-01 | -0.00024 | 0.00666 | 9.72E-01 | -0.00996 | 0.00829 | 2.29E-01 | 0.00061  | 0.00050 | 2.29E-01 | 0.00092  | 0.00115 | 4.24E-01 |
| cg06218079 | 42 | ENSG00000169727 | -0.00017 | 0.00020 | 3.81E-01 | -0.00027 | 0.00030 | 3.78E-01 | -0.00008 | 0.00037 | 8.38E-01 | -0.00023 | 0.00040 | 5.62E-01 | 0.00083  | 0.00124 | 5.06E-01 |
| cg07957088 | 43 | ENSG00000130584 | 0.00242  | 0.00272 | 3.74E-01 | 0.01146  | 0.00829 | 1.67E-01 | -0.00476 | 0.00976 | 6.26E-01 | 0.00363  | 0.00365 | 3.20E-01 | -0.00178 | 0.00533 | 7.39E-01 |
| cg16734845 | 25 | ENSG00000171763 | 0.00064  | 0.00138 | 6.43E-01 | 0.00538  | 0.00301 | 7.35E-02 | 0.00082  | 0.00358 | 8.18E-01 | -0.00063 | 0.00116 | 5.90E-01 | -0.00082 | 0.00815 | 9.19E-01 |
| cg05304461 | 26 | ENSG00000116663 | -0.00004 | 0.00008 | 6.20E-01 | -0.00010 | 0.00016 | 5.19E-01 | 0.00011  | 0.00029 | 7.15E-01 | -0.00004 | 0.00010 | 6.86E-01 | 0.00004  | 0.00027 | 8.83E-01 |
| cg16734845 | 25 | ENSG00000140264 | 0.00108  | 0.00236 | 6.48E-01 | 0.00452  | 0.00616 | 4.63E-01 | -0.00258 | 0.00825 | 7.54E-01 | 0.00219  | 0.00306 | 4.75E-01 | -0.00375 | 0.00558 | 5.02E-01 |
| cg19734370 | 32 | ENSG00000171298 | 0.00048  | 0.00073 | 5.11E-01 | -0.00068 | 0.00056 | 2.27E-01 | 0.00258  | 0.00107 | 1.64E-02 | -0.00025 | 0.00051 | 6.26E-01 | 0.00290  | 0.00236 | 2.18E-01 |
| cg20102034 | 37 | ENSG00000115307 | 0.00275  | 0.00358 | 4.43E-01 | 0.00081  | 0.00443 | 8.55E-01 | 0.00973  | 0.00482 | 4.36E-02 | 0.00671  | 0.00265 | 1.12E-02 | -0.00931 | 0.00561 | 9.72E-02 |
| cg19734370 | 32 | ENSG00000263053 | -0.00010 | 0.00016 | 5.13E-01 | -0.00019 | 0.00038 | 6.05E-01 | 0.00126  | 0.00142 | 3.73E-01 | -0.00012 | 0.00013 | 3.51E-01 | 0.00368  | 0.00257 | 1.52E-01 |
| cg19734370 | 32 | ENSG00000141564 | -0.00051 | 0.00078 | 5.16E-01 | 0.00038  | 0.00076 | 6.19E-01 | 0.00072  | 0.00168 | 6.68E-01 | -0.00148 | 0.00091 | 1.04E-01 | -0.00491 | 0.00330 | 1.38E-01 |
| cg02137691 | 31 | ENSG00000185818 | -0.00061 | 0.00098 | 5.34E-01 | -0.00081 | 0.00076 | 2.83E-01 | 0.00003  | 0.00093 | 9.70E-01 | -0.00819 | 0.00475 | 8.46E-02 | 0.01373  | 0.01052 | 1.92E-01 |
| cg16734845 | 25 | ENSG00000168781 | -0.00075 | 0.00172 | 6.62E-01 | -0.00755 | 0.00413 | 6.72E-02 | -0.00285 | 0.00529 | 5.90E-01 | 0.00130  | 0.00147 | 3.78E-01 | -0.00019 | 0.00258 | 9.41E-01 |
| cg03077331 | 45 | ENSG00000173762 | 0.00062  | 0.00069 | 3.69E-01 | 0.00316  | 0.00627 | 6.14E-01 | -0.00172 | 0.00204 | 3.98E-01 | 0.00039  | 0.00027 | 1.54E-01 | 0.00274  | 0.00146 | 6.11E-02 |
| cg18387671 | 42 | ENSG00000108262 | -0.00038 | 0.00045 | 3.96E-01 | 0.00016  | 0.00055 | 7.69E-01 | -0.00162 | 0.00050 | 1.25E-03 | -0.00021 | 0.00034 | 5.40E-01 | 0.00063  | 0.00098 | 5.23E-01 |
| cg25884324 | 20 | ENSG00000259291 | 0.00008  | 0.00036 | 8.32E-01 | 0.00305  | 0.00218 | 1.60E-01 | 0.00006  | 0.00088 | 9.42E-01 | 0.00019  | 0.00021 | 3.55E-01 | -0.00110 | 0.00091 | 2.26E-01 |
| cg20102034 | 37 | ENSG00000115350 | 0.00201  | 0.00267 | 4.51E-01 | 0.00568  | 0.00864 | 5.11E-01 | -0.00419 | 0.01026 | 6.83E-01 | 0.00311  | 0.00315 | 3.24E-01 | -0.00401 | 0.00773 | 6.04E-01 |
| cg19734370 | 32 | ENSG00000171282 | -0.00148 | 0.00231 | 5.23E-01 | 0.00279  | 0.00150 | 6.31E-02 | -0.00340 | 0.00354 | 3.36E-01 | -0.00173 | 0.00200 | 3.85E-01 | -0.01281 | 0.00669 | 5.54E-02 |
| cg23396786 | 18 | ENSG00000124356 | -0.00041 | 0.00467 | 9.31E-01 | -0.01096 | 0.01136 | 3.35E-01 | 0.00079  | 0.01821 | 9.65E-01 | 0.00058  | 0.00562 | 9.18E-01 | 0.01340  | 0.01717 | 4.35E-01 |
| cg22127773 | 80 | ENSG00000072778 | -0.00074 | 0.00059 | 2.10E-01 | -0.00102 | 0.00132 | 4.41E-01 | -0.00096 | 0.00230 | 6.77E-01 | -0.00083 | 0.00072 | 2.45E-01 | 0.00150  | 0.00242 | 5.34E-01 |

|            |    |                 |          |         |          |          |         |          |          |         |          |          |         |          |          |         |          |
|------------|----|-----------------|----------|---------|----------|----------|---------|----------|----------|---------|----------|----------|---------|----------|----------|---------|----------|
| cg07148038 | 89 | ENSG00000242574 | -0.00664 | 0.00508 | 1.91E-01 | -0.00929 | 0.00439 | 3.43E-02 | 0.00348  | 0.01034 | 7.36E-01 | 0.00080  | 0.00277 | 7.72E-01 | -0.02051 | 0.00651 | 1.63E-03 |
| cg18387671 | 42 | ENSG00000109111 | 0.00014  | 0.00017 | 4.05E-01 | 0.00017  | 0.00029 | 5.69E-01 | 0.00089  | 0.00109 | 4.12E-01 | 0.00013  | 0.00023 | 5.65E-01 | -0.00007 | 0.00052 | 8.92E-01 |
| cg07957088 | 43 | ENSG00000101193 | 0.00288  | 0.00340 | 3.96E-01 | 0.00968  | 0.00773 | 2.11E-01 | 0.01026  | 0.01173 | 3.82E-01 | -0.00195 | 0.00426 | 6.48E-01 | 0.01015  | 0.00924 | 2.72E-01 |
| cg22127773 | 80 | ENSG00000132514 | -0.00059 | 0.00047 | 2.13E-01 | -0.00058 | 0.00151 | 7.00E-01 | 0.00095  | 0.00252 | 7.06E-01 | -0.00043 | 0.00074 | 5.65E-01 | -0.00086 | 0.00070 | 2.22E-01 |
| cg18387671 | 42 | ENSG00000227543 | -0.00020 | 0.00024 | 4.08E-01 | 0.00001  | 0.00006 | 8.68E-01 | -0.00154 | 0.00075 | 3.98E-02 | -0.00036 | 0.00028 | 2.02E-01 | 0.00051  | 0.00079 | 5.19E-01 |
| cg02137691 | 31 | ENSG00000174137 | -0.00032 | 0.00054 | 5.53E-01 | -0.00069 | 0.00083 | 4.05E-01 | 0.00026  | 0.00090 | 7.74E-01 | -0.00139 | 0.00143 | 3.33E-01 | 0.00093  | 0.00190 | 6.22E-01 |
| cg07957088 | 43 | ENSG00000101213 | -0.00145 | 0.00173 | 4.02E-01 | -0.00260 | 0.00384 | 4.99E-01 | -0.00373 | 0.00521 | 4.74E-01 | -0.00143 | 0.00222 | 5.20E-01 | 0.00454  | 0.00619 | 4.63E-01 |
| cg06982745 | 18 | ENSG00000042286 | -0.00001 | 0.00017 | 9.61E-01 | -0.00018 | 0.00053 | 7.30E-01 | 0.00025  | 0.00055 | 6.50E-01 | -0.00006 | 0.00021 | 7.77E-01 | 0.00025  | 0.00053 | 6.37E-01 |
| cg02207312 | 37 | ENSG00000149534 | -0.00016 | 0.00022 | 4.68E-01 | -0.00029 | 0.00017 | 1.00E-01 | 0.00035  | 0.00022 | 1.08E-01 | 0.00007  | 0.00016 | 6.74E-01 | -0.00080 | 0.00023 | 4.07E-04 |
| cg02137691 | 31 | ENSG00000109685 | -0.00105 | 0.00181 | 5.62E-01 | -0.00103 | 0.00475 | 8.28E-01 | -0.00160 | 0.00567 | 7.78E-01 | -0.00080 | 0.00233 | 7.33E-01 | -0.00171 | 0.00466 | 7.13E-01 |
| cg02207312 | 37 | ENSG00000167992 | 0.00002  | 0.00002 | 4.72E-01 | 0.00000  | 0.00003 | 8.91E-01 | -0.00044 | 0.00061 | 4.76E-01 | 0.00002  | 0.00005 | 6.78E-01 | 0.00009  | 0.00006 | 1.05E-01 |
| cg18387671 | 42 | ENSG00000108582 | 0.00027  | 0.00034 | 4.17E-01 | 0.00042  | 0.00044 | 3.45E-01 | 0.00108  | 0.00060 | 6.95E-02 | 0.00034  | 0.00026 | 1.91E-01 | -0.00119 | 0.00071 | 9.54E-02 |
| cg25884324 | 20 | ENSG00000197299 | 0.00014  | 0.00091 | 8.78E-01 | 0.00170  | 0.00213 | 4.25E-01 | -0.00162 | 0.00192 | 3.99E-01 | 0.00079  | 0.00094 | 4.02E-01 | -0.00452 | 0.00361 | 2.10E-01 |
| cg06982745 | 18 | ENSG00000180644 | -0.00005 | 0.00152 | 9.76E-01 | -0.00169 | 0.00127 | 1.84E-01 | 0.00659  | 0.00328 | 4.45E-02 | 0.00151  | 0.00149 | 3.13E-01 | -0.00289 | 0.00126 | 2.15E-02 |
| cg20102034 | 37 | ENSG00000204822 | 0.00044  | 0.00061 | 4.75E-01 | 0.00049  | 0.00157 | 7.54E-01 | 0.00157  | 0.00192 | 4.13E-01 | 0.00038  | 0.00071 | 5.90E-01 | -0.00862 | 0.00633 | 1.73E-01 |
| cg22127773 | 80 | ENSG00000174326 | 0.00116  | 0.00094 | 2.20E-01 | -0.00094 | 0.00197 | 6.32E-01 | 0.00345  | 0.00111 | 1.88E-03 | 0.00092  | 0.00069 | 1.87E-01 | -0.00067 | 0.00213 | 7.53E-01 |
| cg25884324 | 20 | ENSG00000184056 | 0.00035  | 0.00237 | 8.81E-01 | -0.00673 | 0.00273 | 1.38E-02 | 0.00357  | 0.00321 | 2.67E-01 | 0.00251  | 0.00180 | 1.64E-01 | 0.00216  | 0.00325 | 5.06E-01 |
| cg02206852 | 52 | ENSG00000087111 | 0.00176  | 0.00187 | 3.47E-01 | -0.00011 | 0.00698 | 9.88E-01 | -0.00445 | 0.00688 | 5.18E-01 | 0.00227  | 0.00206 | 2.69E-01 | 0.00751  | 0.01090 | 4.91E-01 |
| cg02137691 | 31 | ENSG00000196810 | -0.00024 | 0.00045 | 5.86E-01 | 0.00078  | 0.00671 | 9.07E-01 | -0.00773 | 0.00895 | 3.88E-01 | -0.00011 | 0.00058 | 8.45E-01 | -0.00040 | 0.00070 | 5.71E-01 |
| cg22127773 | 80 | ENSG00000178977 | 0.00053  | 0.00044 | 2.27E-01 | 0.00057  | 0.00058 | 3.29E-01 | -0.00012 | 0.00195 | 9.51E-01 | 0.00065  | 0.00075 | 3.89E-01 | -0.00061 | 0.00299 | 8.39E-01 |
| cg07957088 | 43 | ENSG00000101189 | 0.00464  | 0.00583 | 4.26E-01 | 0.01125  | 0.00794 | 1.57E-01 | 0.02125  | 0.01168 | 6.90E-02 | -0.00436 | 0.00367 | 2.35E-01 | 0.00044  | 0.01033 | 9.66E-01 |
| cg03077331 | 45 | ENSG00000169727 | -0.00238 | 0.00289 | 4.10E-01 | 0.01320  | 0.00811 | 1.03E-01 | -0.01176 | 0.00356 | 9.57E-04 | 0.00027  | 0.00059 | 6.50E-01 | -0.00310 | 0.00219 | 1.58E-01 |
| cg07957088 | 43 | ENSG00000130589 | 0.00063  | 0.00080 | 4.30E-01 | 0.00107  | 0.00063 | 9.10E-02 | -0.00059 | 0.00090 | 5.14E-01 | 0.00593  | 0.00400 | 1.38E-01 | 0.00428  | 0.00678 | 5.27E-01 |
| cg03077331 | 45 | ENSG00000183684 | 0.00052  | 0.00063 | 4.11E-01 | 0.01303  | 0.00498 | 8.85E-03 | 0.00434  | 0.00185 | 1.93E-02 | -0.00009 | 0.00012 | 4.41E-01 | -0.00011 | 0.00040 | 7.82E-01 |
| cg18387671 | 42 | ENSG00000141298 | 0.00027  | 0.00035 | 4.42E-01 | 0.00016  | 0.00028 | 5.73E-01 | 0.00182  | 0.00068 | 7.30E-03 | -0.00033 | 0.00021 | 1.19E-01 | 0.00026  | 0.00066 | 6.97E-01 |
| cg06218079 | 42 | ENSG00000262663 | -0.00010 | 0.00013 | 4.42E-01 | -0.00067 | 0.00083 | 4.18E-01 | -0.00060 | 0.00103 | 5.59E-01 | -0.00003 | 0.00013 | 8.10E-01 | -0.00088 | 0.00057 | 1.23E-01 |
| cg02137691 | 31 | ENSG00000178950 | 0.00034  | 0.00066 | 6.01E-01 | -0.00043 | 0.00528 | 9.35E-01 | 0.00829  | 0.00535 | 1.21E-01 | 0.00011  | 0.00075 | 8.84E-01 | 0.00072  | 0.00149 | 6.28E-01 |
| cg02207312 | 37 | ENSG00000162144 | -0.00007 | 0.00010 | 5.05E-01 | -0.00011 | 0.00013 | 4.03E-01 | 0.00012  | 0.00017 | 4.87E-01 | -0.00056 | 0.00038 | 1.33E-01 | -0.00025 | 0.00059 | 6.75E-01 |
| cg02206852 | 52 | ENSG00000221995 | -0.00165 | 0.00181 | 3.61E-01 | 0.00415  | 0.00740 | 5.75E-01 | -0.00035 | 0.00373 | 9.24E-01 | -0.00272 | 0.00218 | 2.12E-01 | 0.00369  | 0.01455 | 8.00E-01 |
| cg25884324 | 20 | ENSG00000140575 | 0.00007  | 0.00115 | 9.48E-01 | 0.00236  | 0.00155 | 1.28E-01 | -0.00308 | 0.00208 | 1.39E-01 | 0.00125  | 0.00082 | 1.28E-01 | -0.00205 | 0.00191 | 2.84E-01 |
| cg02207312 | 37 | ENSG00000013725 | 0.00005  | 0.00008 | 5.19E-01 | 0.00086  | 0.00037 | 2.04E-02 | 0.00000  | 0.00014 | 9.99E-01 | 0.00004  | 0.00006 | 5.14E-01 | -0.00001 | 0.00012 | 9.35E-01 |
| cg16734845 | 25 | ENSG00000185880 | 0.00011  | 0.00038 | 7.72E-01 | 0.00130  | 0.00145 | 3.69E-01 | 0.00112  | 0.00164 | 4.95E-01 | -0.00002 | 0.00041 | 9.55E-01 | -0.00040 | 0.00174 | 8.19E-01 |
| cg07148038 | 89 | ENSG00000232810 | -0.00178 | 0.00144 | 2.18E-01 | -0.00201 | 0.00186 | 2.82E-01 | 0.00289  | 0.00746 | 6.99E-01 | -0.00142 | 0.00252 | 5.74E-01 | -0.00655 | 0.00791 | 4.08E-01 |
| cg25884324 | 20 | ENSG00000259704 | 0.00001  | 0.00020 | 9.71E-01 | 0.00066  | 0.00075 | 3.82E-01 | 0.00017  | 0.00031 | 5.99E-01 | -0.00019 | 0.00027 | 4.78E-01 | -0.00014 | 0.00285 | 9.59E-01 |
| cg07148038 | 89 | ENSG00000223534 | 0.00329  | 0.00268 | 2.20E-01 | -0.00067 | 0.00583 | 9.08E-01 | -0.00134 | 0.00875 | 8.78E-01 | 0.00165  | 0.00266 | 5.35E-01 | 0.01132  | 0.00479 | 1.81E-02 |
| cg03077331 | 45 | ENSG00000141522 | -0.00018 | 0.00023 | 4.36E-01 | -0.00079 | 0.00181 | 6.63E-01 | -0.00059 | 0.00076 | 4.37E-01 | -0.00010 | 0.00025 | 6.91E-01 | -0.00090 | 0.00135 | 5.07E-01 |
| cg16734845 | 25 | ENSG00000166963 | -0.00065 | 0.00241 | 7.89E-01 | 0.00938  | 0.00611 | 1.25E-01 | -0.00502 | 0.00681 | 4.61E-01 | -0.00078 | 0.00050 | 1.18E-01 | -0.00778 | 0.00701 | 2.67E-01 |
| cg07957088 | 43 | ENSG00000229873 | -0.00288 | 0.00391 | 4.61E-01 | 0.00460  | 0.00426 | 2.80E-01 | -0.01229 | 0.00627 | 4.99E-02 | -0.00135 | 0.00457 | 7.67E-01 | -0.00929 | 0.00957 | 3.32E-01 |
| cg07148038 | 89 | ENSG00000204482 | -0.00229 | 0.00190 | 2.28E-01 | -0.00655 | 0.00301 | 2.93E-02 | 0.00440  | 0.00598 | 4.62E-01 | -0.00158 | 0.00233 | 4.99E-01 | 0.00015  | 0.00463 | 9.74E-01 |
| cg02137691 | 31 | ENSG00000130997 | 0.00164  | 0.00384 | 6.70E-01 | -0.00405 | 0.00486 | 4.04E-01 | 0.01136  | 0.00478 | 1.75E-02 | 0.00504  | 0.00281 | 7.28E-02 | -0.00706 | 0.00490 | 1.50E-01 |
| cg07148038 | 89 | ENSG00000204463 | -0.00282 | 0.00237 | 2.33E-01 | -0.00894 | 0.00412 | 2.99E-02 | 0.00022  | 0.00389 | 9.55E-01 | -0.00048 | 0.00193 | 8.02E-01 | -0.01074 | 0.00926 | 2.46E-01 |
| cg06218079 | 42 | ENSG00000141560 | 0.00019  | 0.00028 | 4.95E-01 | 0.00068  | 0.00021 | 1.14E-03 | -0.00051 | 0.00026 | 5.44E-02 | 0.00024  | 0.00018 | 1.81E-01 | 0.00052  | 0.00082 | 5.30E-01 |

|            |    |                 |          |         |          |          |         |          |          |         |          |          |         |          |          |         |          |
|------------|----|-----------------|----------|---------|----------|----------|---------|----------|----------|---------|----------|----------|---------|----------|----------|---------|----------|
| cg16734845 | 25 | ENSG00000137857 | -0.00100 | 0.00474 | 8.33E-01 | -0.01184 | 0.00597 | 4.74E-02 | 0.00780  | 0.00802 | 3.30E-01 | -0.00389 | 0.00290 | 1.80E-01 | 0.01496  | 0.01046 | 1.53E-01 |
| cg07957088 | 43 | ENSG00000130590 | -0.00034 | 0.00049 | 4.86E-01 | 0.00389  | 0.00556 | 4.84E-01 | -0.01050 | 0.00857 | 2.21E-01 | -0.00033 | 0.00050 | 5.10E-01 | -0.00761 | 0.01045 | 4.66E-01 |
| cg07957088 | 43 | ENSG00000026036 | -0.00039 | 0.00057 | 4.88E-01 | -0.00124 | 0.00124 | 3.16E-01 | 0.00223  | 0.00193 | 2.48E-01 | -0.00013 | 0.00059 | 8.31E-01 | -0.00171 | 0.00134 | 2.03E-01 |
| cg02206852 | 52 | ENSG00000167525 | -0.00030 | 0.00036 | 4.08E-01 | -0.00006 | 0.00126 | 9.60E-01 | -0.00147 | 0.00734 | 8.41E-01 | -0.00051 | 0.00043 | 2.35E-01 | 0.00030  | 0.00076 | 6.90E-01 |
| cg22127773 | 80 | ENSG00000108839 | 0.00144  | 0.00129 | 2.65E-01 | 0.00085  | 0.00147 | 5.65E-01 | 0.00769  | 0.00280 | 6.07E-03 | 0.00181  | 0.00090 | 4.47E-02 | -0.00120 | 0.00094 | 2.04E-01 |
| cg18387671 | 42 | ENSG00000108576 | 0.00004  | 0.00006 | 5.05E-01 | 0.00010  | 0.00010 | 3.09E-01 | 0.00093  | 0.00104 | 3.70E-01 | 0.00002  | 0.00008 | 8.14E-01 | -0.00010 | 0.00019 | 6.19E-01 |
| cg07957088 | 43 | ENSG00000171703 | -0.00077 | 0.00113 | 4.98E-01 | 0.00249  | 0.00345 | 4.71E-01 | -0.00941 | 0.00471 | 4.57E-02 | -0.00030 | 0.00029 | 2.94E-01 | -0.00130 | 0.00182 | 4.76E-01 |
| cg02137691 | 31 | ENSG00000168924 | -0.00050 | 0.00128 | 6.95E-01 | 0.00636  | 0.00665 | 3.38E-01 | 0.00399  | 0.00939 | 6.71E-01 | -0.00122 | 0.00164 | 4.57E-01 | -0.00021 | 0.00220 | 9.26E-01 |
| cg07957088 | 43 | ENSG00000125534 | 0.00186  | 0.00278 | 5.03E-01 | 0.01407  | 0.00720 | 5.05E-02 | -0.01856 | 0.01281 | 1.48E-01 | -0.00047 | 0.00286 | 8.69E-01 | 0.00242  | 0.00148 | 1.02E-01 |
| cg20102034 | 37 | ENSG00000239779 | -0.00050 | 0.00092 | 5.86E-01 | -0.00043 | 0.00094 | 6.46E-01 | 0.00127  | 0.00837 | 8.80E-01 | -0.00307 | 0.00704 | 6.63E-01 | -0.00462 | 0.00888 | 6.03E-01 |
| cg06218079 | 42 | ENSG00000141551 | 0.00044  | 0.00067 | 5.17E-01 | 0.00052  | 0.00107 | 6.28E-01 | 0.00206  | 0.00106 | 5.26E-02 | -0.00027 | 0.00063 | 6.68E-01 | -0.00315 | 0.00350 | 3.69E-01 |
| cg22127773 | 80 | ENSG00000108961 | -0.00017 | 0.00016 | 2.72E-01 | 0.00004  | 0.00027 | 8.87E-01 | 0.00004  | 0.00056 | 9.39E-01 | -0.00032 | 0.00020 | 1.20E-01 | -0.00153 | 0.00335 | 6.48E-01 |
| cg07957088 | 43 | ENSG00000125531 | 0.00033  | 0.00049 | 5.05E-01 | 0.00605  | 0.00433 | 1.62E-01 | 0.00380  | 0.00525 | 4.69E-01 | 0.00024  | 0.00063 | 7.00E-01 | 0.00018  | 0.00080 | 8.18E-01 |
| cg16734845 | 25 | ENSG00000259479 | 0.00011  | 0.00069 | 8.75E-01 | 0.00542  | 0.00635 | 3.94E-01 | 0.01184  | 0.00672 | 7.82E-02 | 0.00022  | 0.00041 | 6.01E-01 | -0.00057 | 0.00082 | 4.92E-01 |
| cg05304461 | 26 | ENSG00000142657 | -0.00004 | 0.00022 | 8.42E-01 | -0.00043 | 0.00092 | 6.43E-01 | -0.00354 | 0.00142 | 1.26E-02 | 0.00009  | 0.00007 | 1.88E-01 | 0.00002  | 0.00020 | 9.07E-01 |
| cg05304461 | 26 | ENSG00000142655 | -0.00015 | 0.00075 | 8.42E-01 | -0.00246 | 0.00085 | 3.95E-03 | 0.00060  | 0.00133 | 6.50E-01 | 0.00018  | 0.00035 | 5.98E-01 | 0.00128  | 0.00094 | 1.72E-01 |
| cg02207312 | 37 | ENSG00000162148 | -0.00003 | 0.00005 | 5.95E-01 | 0.00009  | 0.00040 | 8.30E-01 | -0.00008 | 0.00006 | 1.74E-01 | 0.00012  | 0.00011 | 2.95E-01 | 0.00005  | 0.00016 | 7.77E-01 |
| cg02137691 | 31 | ENSG00000218422 | 0.00014  | 0.00038 | 7.18E-01 | -0.00026 | 0.00040 | 5.16E-01 | 0.00097  | 0.00050 | 5.10E-02 | -0.00021 | 0.00077 | 7.79E-01 | -0.00098 | 0.00184 | 5.93E-01 |
| cg07957088 | 43 | ENSG00000125510 | 0.00032  | 0.00049 | 5.20E-01 | 0.00067  | 0.00069 | 3.34E-01 | -0.00038 | 0.00087 | 6.63E-01 | 0.00028  | 0.00121 | 8.15E-01 | 0.01012  | 0.00678 | 1.35E-01 |
| cg22127773 | 80 | ENSG00000129255 | -0.00093 | 0.00086 | 2.80E-01 | -0.00185 | 0.00132 | 1.60E-01 | -0.00331 | 0.00219 | 1.30E-01 | 0.00022  | 0.00109 | 8.39E-01 | 0.00275  | 0.00480 | 5.66E-01 |
| cg02137691 | 31 | ENSG00000168936 | 0.00080  | 0.00224 | 7.22E-01 | 0.00013  | 0.00228 | 9.55E-01 | -0.00224 | 0.00245 | 3.59E-01 | 0.00981  | 0.00476 | 3.90E-02 | -0.00062 | 0.00694 | 9.29E-01 |
| cg02137691 | 31 | ENSG00000013810 | -0.00019 | 0.00055 | 7.33E-01 | -0.00134 | 0.00148 | 3.65E-01 | 0.00105  | 0.00197 | 5.95E-01 | -0.00016 | 0.00070 | 8.17E-01 | 0.00010  | 0.00136 | 9.42E-01 |
| cg02206852 | 52 | ENSG00000263370 | -0.00245 | 0.00316 | 4.38E-01 | 0.00316  | 0.00491 | 5.20E-01 | -0.00019 | 0.00250 | 9.39E-01 | -0.00838 | 0.00231 | 2.77E-04 | 0.00054  | 0.01272 | 9.66E-01 |
| cg19734370 | 32 | ENSG00000141519 | -0.00006 | 0.00017 | 7.14E-01 | 0.00006  | 0.00024 | 7.94E-01 | 0.00005  | 0.00057 | 9.33E-01 | -0.00013 | 0.00028 | 6.50E-01 | -0.00160 | 0.00096 | 9.29E-02 |
| cg06218079 | 42 | ENSG00000265458 | 0.00043  | 0.00071 | 5.46E-01 | -0.00007 | 0.00042 | 8.60E-01 | -0.00056 | 0.00052 | 2.89E-01 | 0.00296  | 0.00104 | 4.51E-03 | -0.00158 | 0.00627 | 8.00E-01 |
| cg16734845 | 25 | ENSG00000140263 | -0.00018 | 0.00193 | 9.26E-01 | -0.00076 | 0.00481 | 8.74E-01 | -0.00464 | 0.00561 | 4.08E-01 | 0.00029  | 0.00232 | 8.99E-01 | 0.01087  | 0.01181 | 3.57E-01 |
| cg02206852 | 52 | ENSG00000076382 | -0.00148 | 0.00195 | 4.46E-01 | 0.00100  | 0.00122 | 4.12E-01 | -0.01865 | 0.00949 | 4.94E-02 | 0.00008  | 0.00273 | 9.76E-01 | -0.00358 | 0.00183 | 5.03E-02 |
| cg19734370 | 32 | ENSG00000185168 | 0.00009  | 0.00027 | 7.28E-01 | -0.00056 | 0.00083 | 5.01E-01 | -0.00051 | 0.00157 | 7.43E-01 | 0.00025  | 0.00030 | 4.03E-01 | -0.00054 | 0.00105 | 6.09E-01 |
| cg06218079 | 42 | ENSG00000141562 | 0.00042  | 0.00072 | 5.56E-01 | -0.00069 | 0.00076 | 3.63E-01 | -0.00008 | 0.00078 | 9.21E-01 | 0.00192  | 0.00071 | 7.29E-03 | 0.00070  | 0.00296 | 8.13E-01 |
| cg02137691 | 31 | ENSG00000244459 | -0.00063 | 0.00200 | 7.54E-01 | -0.00236 | 0.00235 | 3.17E-01 | 0.00132  | 0.00299 | 6.59E-01 | 0.00329  | 0.00233 | 1.58E-01 | -0.00636 | 0.00356 | 7.43E-02 |
| cg02137691 | 31 | ENSG00000090316 | -0.00121 | 0.00394 | 7.58E-01 | 0.01159  | 0.00837 | 1.66E-01 | -0.00483 | 0.00926 | 6.02E-01 | -0.00601 | 0.00328 | 6.70E-02 | 0.00237  | 0.00768 | 7.58E-01 |
| cg03077331 | 45 | ENSG00000141542 | -0.00075 | 0.00118 | 5.23E-01 | -0.00369 | 0.01003 | 7.13E-01 | -0.00636 | 0.00351 | 7.02E-02 | -0.00001 | 0.00118 | 9.92E-01 | 0.00047  | 0.00774 | 9.52E-01 |
| cg02137691 | 31 | ENSG00000179979 | 0.00082  | 0.00266 | 7.59E-01 | 0.00356  | 0.00869 | 6.82E-01 | -0.00176 | 0.01310 | 8.93E-01 | 0.00080  | 0.00338 | 8.13E-01 | 0.00025  | 0.00535 | 9.63E-01 |
| cg02207312 | 37 | ENSG00000110108 | 0.00004  | 0.00010 | 6.41E-01 | 0.00064  | 0.00046 | 1.64E-01 | -0.00018 | 0.00015 | 2.43E-01 | 0.00002  | 0.00007 | 7.45E-01 | 0.00021  | 0.00015 | 1.73E-01 |
| cg03077331 | 45 | ENSG00000141568 | -0.00215 | 0.00340 | 5.27E-01 | -0.01107 | 0.01138 | 3.31E-01 | 0.00201  | 0.00473 | 6.71E-01 | 0.00020  | 0.00154 | 8.96E-01 | -0.01983 | 0.00990 | 4.53E-02 |
| cg02207312 | 37 | ENSG00000166928 | -0.00005 | 0.00010 | 6.44E-01 | 0.00050  | 0.00075 | 5.01E-01 | -0.00001 | 0.00038 | 9.75E-01 | 0.00004  | 0.00006 | 4.44E-01 | -0.00024 | 0.00013 | 5.87E-02 |
| cg22127773 | 80 | ENSG00000179029 | -0.00059 | 0.00057 | 2.98E-01 | -0.00067 | 0.00127 | 6.00E-01 | 0.00111  | 0.00211 | 5.98E-01 | -0.00070 | 0.00068 | 3.01E-01 | -0.00164 | 0.00333 | 6.22E-01 |
| cg06218079 | 42 | ENSG00000263731 | 0.00029  | 0.00052 | 5.69E-01 | 0.00067  | 0.00175 | 7.03E-01 | 0.00007  | 0.00206 | 9.73E-01 | 0.00020  | 0.00057 | 7.34E-01 | 0.00199  | 0.00269 | 4.60E-01 |
| cg22127773 | 80 | ENSG00000141505 | 0.00018  | 0.00017 | 2.99E-01 | 0.00012  | 0.00013 | 3.61E-01 | -0.00007 | 0.00022 | 7.67E-01 | 0.00084  | 0.00031 | 7.43E-03 | -0.00008 | 0.00041 | 8.52E-01 |
| cg02207312 | 37 | ENSG00000168496 | 0.00010  | 0.00022 | 6.47E-01 | 0.00025  | 0.00031 | 4.24E-01 | -0.00015 | 0.00014 | 2.58E-01 | 0.00067  | 0.00031 | 2.79E-02 | -0.00038 | 0.00044 | 3.97E-01 |
| cg03077331 | 45 | ENSG00000185624 | 0.00082  | 0.00133 | 5.34E-01 | -0.00774 | 0.00693 | 2.64E-01 | -0.00172 | 0.00281 | 5.42E-01 | 0.00072  | 0.00056 | 2.01E-01 | 0.00431  | 0.00226 | 5.71E-02 |
| cg07148038 | 89 | ENSG00000213719 | -0.00129 | 0.00118 | 2.71E-01 | 0.00063  | 0.00498 | 9.00E-01 | -0.00389 | 0.00323 | 2.28E-01 | -0.00352 | 0.00189 | 6.21E-02 | 0.00012  | 0.00093 | 8.97E-01 |

|            |    |                 |          |         |          |          |         |          |          |         |          |          |         |          |          |         |          |
|------------|----|-----------------|----------|---------|----------|----------|---------|----------|----------|---------|----------|----------|---------|----------|----------|---------|----------|
| cg02206852 | 52 | ENSG00000198720 | 0.00037  | 0.00050 | 4.65E-01 | -0.00149 | 0.00249 | 5.48E-01 | -0.00037 | 0.01422 | 9.79E-01 | 0.00044  | 0.00051 | 3.89E-01 | 0.00088  | 0.00630 | 8.89E-01 |
| cg06218079 | 42 | ENSG00000184551 | -0.00008 | 0.00014 | 5.78E-01 | -0.00102 | 0.00051 | 4.42E-02 | -0.00052 | 0.00057 | 3.58E-01 | 0.00002  | 0.00007 | 7.29E-01 | 0.00003  | 0.00018 | 8.76E-01 |
| cg02207312 | 37 | ENSG00000149483 | 0.00012  | 0.00026 | 6.57E-01 | -0.00070 | 0.00075 | 3.50E-01 | 0.00097  | 0.00071 | 1.74E-01 | -0.00006 | 0.00027 | 8.36E-01 | 0.00052  | 0.00053 | 3.30E-01 |
| cg05304461 | 26 | ENSG00000116670 | -0.00002 | 0.00028 | 9.37E-01 | 0.00026  | 0.00056 | 6.39E-01 | -0.00040 | 0.00086 | 6.37E-01 | -0.00020 | 0.00038 | 5.99E-01 | 0.00075  | 0.00096 | 4.35E-01 |
| cg03077331 | 45 | ENSG00000169733 | -0.00167 | 0.00275 | 5.42E-01 | -0.00033 | 0.00270 | 9.04E-01 | 0.00326  | 0.00093 | 4.55E-04 | -0.00443 | 0.00173 | 1.06E-02 | -0.01228 | 0.00691 | 7.55E-02 |
| cg03077331 | 45 | ENSG00000187531 | 0.00098  | 0.00163 | 5.46E-01 | 0.00142  | 0.00918 | 8.77E-01 | 0.00055  | 0.00325 | 8.65E-01 | 0.00122  | 0.00199 | 5.40E-01 | -0.00033 | 0.00748 | 9.64E-01 |
| cg03077331 | 45 | ENSG00000265458 | -0.00236 | 0.00398 | 5.53E-01 | 0.02596  | 0.01886 | 1.69E-01 | -0.01272 | 0.00681 | 6.19E-02 | 0.00143  | 0.00114 | 2.09E-01 | -0.00507 | 0.00428 | 2.36E-01 |
| cg19734370 | 32 | ENSG00000173818 | 0.00034  | 0.00119 | 7.78E-01 | 0.00040  | 0.00152 | 7.94E-01 | 0.00345  | 0.00297 | 2.46E-01 | -0.00147 | 0.00133 | 2.68E-01 | 0.00538  | 0.00448 | 2.30E-01 |
| cg05304461 | 26 | ENSG00000116661 | -0.00002 | 0.00036 | 9.58E-01 | -0.00045 | 0.00086 | 6.00E-01 | 0.00072  | 0.00151 | 6.33E-01 | -0.00004 | 0.00042 | 9.19E-01 | 0.00070  | 0.00135 | 6.02E-01 |
| cg18387671 | 42 | ENSG00000198242 | 0.00005  | 0.00009 | 5.94E-01 | 0.00025  | 0.00035 | 4.67E-01 | -0.00035 | 0.00026 | 1.89E-01 | 0.00006  | 0.00003 | 3.89E-02 | 0.00041  | 0.00038 | 2.78E-01 |
| cg06218079 | 42 | ENSG00000141580 | -0.00038 | 0.00072 | 5.94E-01 | 0.00068  | 0.00060 | 2.54E-01 | -0.00006 | 0.00059 | 9.16E-01 | -0.00194 | 0.00054 | 3.08E-04 | 0.00040  | 0.00218 | 8.55E-01 |
| cg02207312 | 37 | ENSG00000110104 | 0.00006  | 0.00015 | 6.75E-01 | -0.00018 | 0.00070 | 7.97E-01 | -0.00045 | 0.00039 | 2.52E-01 | 0.00017  | 0.00018 | 3.50E-01 | 0.00016  | 0.00040 | 6.90E-01 |
| cg02207312 | 37 | ENSG00000149516 | -0.00006 | 0.00014 | 6.77E-01 | -0.00015 | 0.00018 | 4.04E-01 | 0.00017  | 0.00056 | 7.56E-01 | 0.00001  | 0.00024 | 9.80E-01 | 0.00046  | 0.00074 | 5.34E-01 |
| cg22127773 | 80 | ENSG00000125434 | 0.00080  | 0.00080 | 3.13E-01 | 0.00046  | 0.00096 | 6.31E-01 | 0.00347  | 0.00161 | 3.09E-02 | -0.00028 | 0.00082 | 7.29E-01 | 0.00242  | 0.00343 | 4.82E-01 |
| cg06218079 | 42 | ENSG00000260563 | -0.00030 | 0.00057 | 5.98E-01 | 0.00031  | 0.00096 | 7.48E-01 | 0.00005  | 0.00098 | 9.59E-01 | -0.00167 | 0.00105 | 1.12E-01 | 0.00225  | 0.00336 | 5.03E-01 |
| cg22127773 | 80 | ENSG00000178999 | -0.00048 | 0.00047 | 3.15E-01 | -0.00059 | 0.00128 | 6.49E-01 | -0.00191 | 0.00130 | 1.43E-01 | -0.00001 | 0.00058 | 9.86E-01 | -0.00259 | 0.00206 | 2.08E-01 |
| cg07957088 | 43 | ENSG00000101187 | -0.00126 | 0.00231 | 5.86E-01 | -0.00176 | 0.00506 | 7.28E-01 | -0.00423 | 0.00647 | 5.13E-01 | -0.00064 | 0.00314 | 8.40E-01 | -0.00007 | 0.00653 | 9.92E-01 |
| cg02206852 | 52 | ENSG00000264304 | 0.00155  | 0.00221 | 4.85E-01 | -0.00192 | 0.00268 | 4.75E-01 | 0.00868  | 0.00634 | 1.71E-01 | 0.00372  | 0.00332 | 2.63E-01 | 0.00499  | 0.01172 | 6.70E-01 |
| cg03077331 | 45 | ENSG00000167363 | 0.00095  | 0.00163 | 5.61E-01 | -0.01593 | 0.01121 | 1.55E-01 | 0.00190  | 0.00462 | 6.81E-01 | 0.00134  | 0.00180 | 4.58E-01 | -0.00159 | 0.00929 | 8.64E-01 |
| cg02137691 | 31 | ENSG00000243449 | -0.00012 | 0.00050 | 8.15E-01 | -0.00286 | 0.00413 | 4.89E-01 | -0.00010 | 0.00482 | 9.84E-01 | -0.00066 | 0.00034 | 5.04E-02 | 0.00056  | 0.00040 | 1.63E-01 |
| cg02137691 | 31 | ENSG00000127418 | 0.00131  | 0.00570 | 8.19E-01 | 0.02100  | 0.00722 | 3.62E-03 | -0.00554 | 0.00846 | 5.13E-01 | -0.00228 | 0.00327 | 4.86E-01 | -0.00684 | 0.00668 | 3.06E-01 |
| cg07148038 | 89 | ENSG00000213722 | 0.00226  | 0.00212 | 2.86E-01 | 0.00491  | 0.00289 | 8.89E-02 | -0.00342 | 0.01011 | 7.35E-01 | 0.00059  | 0.00434 | 8.93E-01 | -0.00218 | 0.00507 | 6.67E-01 |
| cg20102034 | 37 | ENSG00000115274 | -0.00027 | 0.00069 | 6.90E-01 | 0.00052  | 0.00153 | 7.31E-01 | -0.00305 | 0.00221 | 1.69E-01 | -0.00017 | 0.00088 | 8.46E-01 | 0.00017  | 0.00218 | 9.39E-01 |
| cg02207312 | 37 | ENSG00000167986 | -0.00013 | 0.00034 | 6.95E-01 | -0.00028 | 0.00051 | 5.78E-01 | -0.00039 | 0.00070 | 5.73E-01 | 0.00053  | 0.00034 | 1.17E-01 | -0.00085 | 0.00056 | 1.29E-01 |
| cg07148038 | 89 | ENSG00000179344 | -0.00461 | 0.00435 | 2.89E-01 | -0.00850 | 0.00626 | 1.75E-01 | -0.00410 | 0.00862 | 6.35E-01 | -0.00985 | 0.00301 | 1.05E-03 | 0.01072  | 0.00774 | 1.66E-01 |
| cg19734370 | 32 | ENSG00000173821 | -0.00006 | 0.00026 | 8.04E-01 | 0.00051  | 0.00158 | 7.47E-01 | 0.00233  | 0.00326 | 4.75E-01 | -0.00008 | 0.00027 | 7.77E-01 | -0.00032 | 0.00096 | 7.39E-01 |
| cg03077331 | 45 | ENSG00000262663 | 0.00130  | 0.00232 | 5.74E-01 | 0.02758  | 0.01218 | 2.36E-02 | -0.00279 | 0.00487 | 5.67E-01 | 0.00050  | 0.00035 | 1.55E-01 | 0.00211  | 0.00337 | 5.31E-01 |
| cg07148038 | 89 | ENSG00000204392 | 0.00041  | 0.00039 | 2.92E-01 | -0.00026 | 0.00069 | 7.04E-01 | -0.00038 | 0.00110 | 7.27E-01 | 0.00096  | 0.00051 | 5.68E-02 | -0.00335 | 0.00622 | 5.91E-01 |
| cg02206852 | 52 | ENSG00000264290 | -0.00206 | 0.00307 | 5.02E-01 | -0.00437 | 0.00439 | 3.20E-01 | 0.01566  | 0.00932 | 9.30E-02 | -0.00175 | 0.00110 | 1.10E-01 | -0.01187 | 0.00790 | 1.33E-01 |
| cg02206852 | 52 | ENSG00000264608 | -0.00168 | 0.00251 | 5.03E-01 | 0.00268  | 0.00584 | 6.46E-01 | -0.01362 | 0.00667 | 4.12E-02 | -0.00015 | 0.00249 | 9.52E-01 | -0.00144 | 0.00429 | 7.38E-01 |
| cg18387671 | 42 | ENSG00000198720 | 0.00007  | 0.00014 | 6.23E-01 | 0.00043  | 0.00041 | 2.94E-01 | -0.00071 | 0.00066 | 2.83E-01 | -0.00006 | 0.00019 | 7.73E-01 | 0.00024  | 0.00024 | 3.14E-01 |
| cg02137691 | 31 | ENSG00000159692 | -0.00054 | 0.00274 | 8.44E-01 | 0.00439  | 0.00950 | 6.44E-01 | -0.00250 | 0.01019 | 8.07E-01 | 0.00163  | 0.00338 | 6.29E-01 | -0.00952 | 0.00630 | 1.31E-01 |
| cg02207312 | 37 | ENSG00000134780 | -0.00006 | 0.00016 | 7.09E-01 | -0.00003 | 0.00064 | 9.62E-01 | -0.00022 | 0.00035 | 5.25E-01 | 0.00003  | 0.00022 | 8.88E-01 | -0.00017 | 0.00041 | 6.79E-01 |
| cg20102034 | 37 | ENSG00000144034 | 0.00063  | 0.00170 | 7.10E-01 | -0.00200 | 0.00223 | 3.69E-01 | -0.00232 | 0.00320 | 4.67E-01 | 0.00391  | 0.00193 | 4.28E-02 | 0.00196  | 0.00334 | 5.58E-01 |
| cg19734370 | 32 | ENSG00000260005 | 0.00010  | 0.00044 | 8.21E-01 | -0.00029 | 0.00107 | 7.89E-01 | 0.00101  | 0.00259 | 6.96E-01 | 0.00017  | 0.00188 | 9.28E-01 | 0.00014  | 0.00050 | 7.75E-01 |
| cg02207312 | 37 | ENSG00000110448 | 0.00012  | 0.00034 | 7.11E-01 | -0.00117 | 0.00072 | 1.05E-01 | 0.00099  | 0.00058 | 8.63E-02 | 0.00010  | 0.00026 | 6.89E-01 | 0.00026  | 0.00057 | 6.48E-01 |
| cg02206852 | 52 | ENSG00000167543 | 0.00022  | 0.00033 | 5.07E-01 | 0.00135  | 0.00302 | 6.55E-01 | 0.00021  | 0.00042 | 6.17E-01 | 0.00009  | 0.00056 | 8.74E-01 | 0.00150  | 0.00196 | 4.45E-01 |
| cg18387671 | 42 | ENSG00000179761 | 0.00005  | 0.00011 | 6.32E-01 | 0.00016  | 0.00025 | 5.05E-01 | -0.00003 | 0.00004 | 5.47E-01 | 0.00063  | 0.00032 | 4.91E-02 | -0.00008 | 0.00020 | 6.68E-01 |
| cg18387671 | 42 | ENSG00000167536 | 0.00002  | 0.00004 | 6.33E-01 | 0.00020  | 0.00031 | 5.13E-01 | 0.00008  | 0.00018 | 6.54E-01 | 0.00003  | 0.00005 | 5.88E-01 | -0.00003 | 0.00009 | 7.26E-01 |
| cg03077331 | 45 | ENSG00000265678 | -0.00071 | 0.00132 | 5.91E-01 | 0.00236  | 0.00528 | 6.55E-01 | -0.00170 | 0.00181 | 3.50E-01 | -0.00008 | 0.00210 | 9.70E-01 | 0.00971  | 0.01494 | 5.16E-01 |
| cg07957088 | 43 | ENSG00000196421 | -0.00195 | 0.00393 | 6.21E-01 | -0.00917 | 0.00474 | 5.31E-02 | 0.01443  | 0.00708 | 4.15E-02 | 0.00061  | 0.00131 | 6.40E-01 | -0.00883 | 0.00354 | 1.27E-02 |
| cg18387671 | 42 | ENSG00000109118 | -0.00016 | 0.00034 | 6.38E-01 | 0.00040  | 0.00056 | 4.71E-01 | -0.00143 | 0.00078 | 6.59E-02 | -0.00003 | 0.00041 | 9.45E-01 | -0.00023 | 0.00100 | 8.21E-01 |

|            |    |                 |          |         |          |          |         |          |          |         |          |          |         |          |          |         |          |
|------------|----|-----------------|----------|---------|----------|----------|---------|----------|----------|---------|----------|----------|---------|----------|----------|---------|----------|
| cg02206852 | 52 | ENSG00000109083 | -0.00200 | 0.00312 | 5.21E-01 | 0.00079  | 0.00694 | 9.10E-01 | -0.00780 | 0.00285 | 6.30E-03 | 0.00214  | 0.00248 | 3.88E-01 | -0.00160 | 0.00669 | 8.11E-01 |
| cg02137691 | 31 | ENSG00000127415 | 0.00054  | 0.00342 | 8.75E-01 | 0.00361  | 0.00612 | 5.55E-01 | -0.01026 | 0.00671 | 1.26E-01 | 0.00542  | 0.00370 | 1.44E-01 | -0.00196 | 0.00643 | 7.61E-01 |
| cg20102034 | 37 | ENSG00000114956 | 0.00087  | 0.00260 | 7.37E-01 | 0.00105  | 0.00765 | 8.91E-01 | 0.00814  | 0.00933 | 3.83E-01 | 0.00078  | 0.00306 | 7.99E-01 | -0.00562 | 0.00923 | 5.43E-01 |
| cg19734370 | 32 | ENSG00000181409 | -0.00002 | 0.00012 | 8.53E-01 | -0.00011 | 0.00013 | 4.16E-01 | 0.00023  | 0.00026 | 3.79E-01 | 0.00029  | 0.00057 | 6.14E-01 | 0.00037  | 0.00134 | 7.86E-01 |
| cg02207312 | 37 | ENSG00000110079 | 0.00006  | 0.00019 | 7.46E-01 | 0.00001  | 0.00036 | 9.88E-01 | -0.00012 | 0.00063 | 8.52E-01 | 0.00013  | 0.00026 | 6.21E-01 | 0.00002  | 0.00066 | 9.82E-01 |
| cg06218079 | 42 | ENSG00000176155 | 0.00036  | 0.00082 | 6.58E-01 | 0.00001  | 0.00108 | 9.93E-01 | 0.00055  | 0.00153 | 7.19E-01 | -0.00059 | 0.00066 | 3.67E-01 | 0.00505  | 0.00237 | 3.27E-02 |
| cg02206852 | 52 | ENSG00000160551 | -0.00120 | 0.00192 | 5.32E-01 | 0.00547  | 0.00620 | 3.77E-01 | -0.00394 | 0.00442 | 3.72E-01 | -0.00147 | 0.00248 | 5.53E-01 | -0.00087 | 0.00566 | 8.78E-01 |
| cg02206852 | 52 | ENSG00000173065 | 0.00144  | 0.00232 | 5.33E-01 | -0.01057 | 0.00504 | 3.58E-02 | 0.00674  | 0.00584 | 2.49E-01 | 0.00221  | 0.00113 | 4.99E-02 | 0.00400  | 0.00237 | 9.12E-02 |
| cg20102034 | 37 | ENSG00000065911 | -0.00058 | 0.00183 | 7.51E-01 | 0.00196  | 0.00448 | 6.61E-01 | -0.00433 | 0.00476 | 3.63E-01 | -0.00158 | 0.00257 | 5.39E-01 | 0.00295  | 0.00431 | 4.95E-01 |
| cg20102034 | 37 | ENSG00000188687 | -0.00012 | 0.00039 | 7.54E-01 | 0.00030  | 0.00069 | 6.69E-01 | -0.00049 | 0.00094 | 6.00E-01 | -0.00025 | 0.00054 | 6.48E-01 | -0.00376 | 0.01263 | 7.66E-01 |
| cg02207312 | 37 | ENSG00000187049 | 0.00001  | 0.00002 | 7.55E-01 | -0.00017 | 0.00044 | 7.08E-01 | 0.00036  | 0.00034 | 2.87E-01 | 0.00001  | 0.00003 | 7.76E-01 | 0.00000  | 0.00003 | 9.47E-01 |
| cg07148038 | 89 | ENSG00000168394 | -0.00201 | 0.00200 | 3.15E-01 | -0.00317 | 0.00564 | 5.74E-01 | -0.00783 | 0.00675 | 2.46E-01 | -0.00146 | 0.00240 | 5.42E-01 | 0.00097  | 0.00659 | 8.83E-01 |
| cg07148038 | 89 | ENSG00000204310 | 0.00071  | 0.00071 | 3.15E-01 | -0.00007 | 0.00056 | 9.01E-01 | -0.00050 | 0.00067 | 4.52E-01 | 0.00232  | 0.00104 | 2.60E-02 | 0.00283  | 0.00161 | 7.92E-02 |
| cg22127773 | 80 | ENSG00000174282 | -0.00098 | 0.00105 | 3.51E-01 | -0.00332 | 0.00247 | 1.78E-01 | -0.00300 | 0.00153 | 5.01E-02 | 0.00029  | 0.00051 | 5.64E-01 | 0.00047  | 0.00224 | 8.34E-01 |
| cg03077331 | 45 | ENSG00000141526 | 0.00040  | 0.00083 | 6.29E-01 | 0.00013  | 0.00591 | 9.82E-01 | 0.00099  | 0.00178 | 5.78E-01 | 0.00012  | 0.00098 | 9.02E-01 | 0.00177  | 0.00353 | 6.15E-01 |
| cg20102034 | 37 | ENSG00000124356 | 0.00018  | 0.00060 | 7.69E-01 | -0.00121 | 0.00899 | 8.93E-01 | -0.00154 | 0.01121 | 8.91E-01 | 0.00058  | 0.00065 | 3.74E-01 | -0.00227 | 0.00163 | 1.64E-01 |
| cg19734370 | 32 | ENSG00000176108 | 0.00015  | 0.00113 | 8.91E-01 | -0.00131 | 0.00106 | 2.15E-01 | 0.00666  | 0.00275 | 1.54E-02 | 0.00055  | 0.00065 | 3.93E-01 | -0.00192 | 0.00153 | 2.08E-01 |
| cg18387671 | 42 | ENSG00000196535 | -0.00001 | 0.00003 | 6.84E-01 | -0.00010 | 0.00014 | 4.63E-01 | 0.00032  | 0.00043 | 4.54E-01 | 0.00005  | 0.00006 | 4.14E-01 | -0.00004 | 0.00004 | 3.49E-01 |
| cg20102034 | 37 | ENSG00000005448 | -0.00023 | 0.00082 | 7.83E-01 | -0.00172 | 0.00137 | 2.08E-01 | -0.00097 | 0.00195 | 6.18E-01 | 0.00111  | 0.00066 | 9.23E-02 | -0.00113 | 0.00165 | 4.96E-01 |
| cg19734370 | 32 | ENSG00000181523 | 0.00003  | 0.00030 | 9.12E-01 | 0.00004  | 0.00027 | 8.83E-01 | -0.00090 | 0.00061 | 1.37E-01 | 0.00062  | 0.00023 | 6.28E-03 | -0.00032 | 0.00055 | 5.59E-01 |
| cg02207312 | 37 | ENSG00000221968 | 0.00003  | 0.00010 | 7.93E-01 | 0.00032  | 0.00059 | 5.89E-01 | 0.00016  | 0.00051 | 7.56E-01 | 0.00010  | 0.00012 | 4.19E-01 | -0.00021 | 0.00020 | 2.77E-01 |
| cg22127773 | 80 | ENSG00000170175 | -0.00046 | 0.00051 | 3.67E-01 | -0.00063 | 0.00054 | 2.44E-01 | -0.00159 | 0.00430 | 7.11E-01 | 0.00114  | 0.00165 | 4.88E-01 | 0.00232  | 0.00707 | 7.43E-01 |
| cg02137691 | 31 | ENSG00000125386 | 0.00007  | 0.00111 | 9.48E-01 | 0.00042  | 0.00169 | 8.05E-01 | -0.00465 | 0.00232 | 4.55E-02 | 0.00057  | 0.00094 | 5.40E-01 | 0.00223  | 0.00180 | 2.17E-01 |
| cg18387671 | 42 | ENSG00000109113 | -0.00009 | 0.00025 | 7.02E-01 | -0.00014 | 0.00050 | 7.82E-01 | -0.00012 | 0.00044 | 7.89E-01 | 0.00002  | 0.00041 | 9.62E-01 | -0.00039 | 0.00087 | 6.55E-01 |
| cg22127773 | 80 | ENSG00000213859 | -0.00054 | 0.00061 | 3.70E-01 | -0.00073 | 0.00162 | 6.52E-01 | 0.00006  | 0.00108 | 9.53E-01 | -0.00118 | 0.00087 | 1.77E-01 | 0.00158  | 0.00235 | 5.00E-01 |
| cg18387671 | 42 | ENSG00000173065 | 0.00003  | 0.00008 | 7.05E-01 | 0.00028  | 0.00040 | 4.72E-01 | 0.00002  | 0.00008 | 8.52E-01 | 0.00013  | 0.00039 | 7.46E-01 | -0.00015 | 0.00112 | 8.97E-01 |
| cg20102034 | 37 | ENSG00000237883 | -0.00060 | 0.00245 | 8.05E-01 | -0.00199 | 0.00706 | 7.78E-01 | -0.00585 | 0.01107 | 5.98E-01 | 0.00056  | 0.00281 | 8.41E-01 | -0.00691 | 0.00905 | 4.45E-01 |
| cg22127773 | 80 | ENSG00000129244 | -0.00066 | 0.00074 | 3.74E-01 | -0.00075 | 0.00152 | 6.24E-01 | 0.00325  | 0.00301 | 2.80E-01 | -0.00082 | 0.00095 | 3.83E-01 | -0.00191 | 0.00247 | 4.38E-01 |
| cg20102034 | 37 | ENSG00000163170 | 0.00064  | 0.00267 | 8.10E-01 | -0.00847 | 0.00475 | 7.47E-02 | -0.00277 | 0.00546 | 6.13E-01 | 0.00547  | 0.00318 | 8.51E-02 | 0.00302  | 0.00179 | 9.20E-02 |
| cg06218079 | 42 | ENSG00000185813 | -0.00019 | 0.00052 | 7.15E-01 | -0.00037 | 0.00029 | 2.10E-01 | 0.00077  | 0.00034 | 2.31E-02 | 0.00022  | 0.00045 | 6.31E-01 | -0.00468 | 0.00162 | 3.90E-03 |
| cg07957088 | 43 | ENSG00000198276 | 0.00023  | 0.00058 | 6.99E-01 | -0.00475 | 0.00556 | 3.93E-01 | -0.00281 | 0.00850 | 7.41E-01 | 0.00025  | 0.00059 | 6.67E-01 | 0.00704  | 0.00742 | 3.43E-01 |
| cg02137691 | 31 | ENSG00000163945 | 0.00010  | 0.00247 | 9.69E-01 | 0.00672  | 0.00653 | 3.04E-01 | -0.00380 | 0.00800 | 6.34E-01 | -0.00067 | 0.00299 | 8.22E-01 | -0.00056 | 0.00884 | 9.49E-01 |
| cg02207312 | 37 | ENSG00000149532 | 0.00004  | 0.00016 | 8.15E-01 | -0.00023 | 0.00051 | 6.57E-01 | 0.00001  | 0.00037 | 9.68E-01 | 0.00013  | 0.00021 | 5.28E-01 | -0.00023 | 0.00052 | 6.61E-01 |
| cg02206852 | 52 | ENSG00000227543 | -0.00198 | 0.00360 | 5.82E-01 | 0.00552  | 0.00368 | 1.34E-01 | -0.01431 | 0.01019 | 1.60E-01 | -0.00264 | 0.00548 | 6.30E-01 | -0.00524 | 0.00359 | 1.45E-01 |
| cg19734370 | 32 | ENSG00000141570 | -0.00010 | 0.00146 | 9.47E-01 | -0.00055 | 0.00147 | 7.08E-01 | -0.00138 | 0.00343 | 6.88E-01 | 0.00218  | 0.00162 | 1.81E-01 | -0.01035 | 0.00642 | 1.07E-01 |
| cg18387671 | 42 | ENSG00000108587 | 0.00010  | 0.00027 | 7.22E-01 | -0.00033 | 0.00057 | 5.62E-01 | 0.00061  | 0.00075 | 4.16E-01 | 0.00016  | 0.00035 | 6.45E-01 | -0.00007 | 0.00110 | 9.49E-01 |
| cg22127773 | 80 | ENSG00000196544 | 0.00016  | 0.00018 | 3.79E-01 | 0.00018  | 0.00019 | 3.27E-01 | -0.00019 | 0.00249 | 9.40E-01 | -0.00034 | 0.00104 | 7.43E-01 | -0.00216 | 0.00477 | 6.51E-01 |
| cg02207312 | 37 | ENSG00000124920 | 0.00010  | 0.00043 | 8.22E-01 | -0.00067 | 0.00037 | 6.93E-02 | -0.00034 | 0.00085 | 6.85E-01 | 0.00041  | 0.00034 | 2.22E-01 | 0.00146  | 0.00086 | 8.92E-02 |
| cg02137691 | 31 | ENSG00000163950 | 0.00004  | 0.00199 | 9.84E-01 | 0.00296  | 0.00463 | 5.22E-01 | -0.00417 | 0.00544 | 4.43E-01 | -0.00024 | 0.00264 | 9.27E-01 | 0.00174  | 0.00605 | 7.74E-01 |
| cg07957088 | 43 | ENSG00000101210 | -0.00133 | 0.00360 | 7.11E-01 | 0.00540  | 0.00542 | 3.18E-01 | -0.00229 | 0.00777 | 7.68E-01 | -0.00002 | 0.00253 | 9.94E-01 | -0.01812 | 0.00889 | 4.14E-02 |
| cg19734370 | 32 | ENSG00000141543 | -0.00006 | 0.00111 | 9.59E-01 | 0.00116  | 0.00135 | 3.90E-01 | -0.00208 | 0.00269 | 4.40E-01 | 0.00032  | 0.00129 | 8.03E-01 | -0.00880 | 0.00540 | 1.03E-01 |
| cg20102034 | 37 | ENSG00000135622 | 0.00050  | 0.00235 | 8.32E-01 | 0.00288  | 0.00585 | 6.23E-01 | -0.01204 | 0.00791 | 1.28E-01 | 0.00147  | 0.00280 | 6.00E-01 | 0.00131  | 0.01074 | 9.03E-01 |

|            |    |                 |          |         |          |          |         |          |          |         |          |          |         |          |          |         |          |
|------------|----|-----------------|----------|---------|----------|----------|---------|----------|----------|---------|----------|----------|---------|----------|----------|---------|----------|
| cg20102034 | 37 | ENSG00000187605 | -0.00107 | 0.00508 | 8.33E-01 | 0.00381  | 0.00898 | 6.71E-01 | 0.01572  | 0.00979 | 1.08E-01 | -0.00710 | 0.00440 | 1.07E-01 | -0.00847 | 0.00817 | 3.00E-01 |
| cg20102034 | 37 | ENSG00000115289 | -0.00070 | 0.00336 | 8.34E-01 | 0.00250  | 0.00868 | 7.73E-01 | 0.01231  | 0.01238 | 3.20E-01 | -0.00291 | 0.00401 | 4.69E-01 | 0.00075  | 0.01245 | 9.52E-01 |
| cg02207312 | 37 | ENSG00000110446 | -0.00004 | 0.00021 | 8.36E-01 | -0.00059 | 0.00057 | 2.96E-01 | 0.00041  | 0.00049 | 3.98E-01 | -0.00015 | 0.00029 | 6.21E-01 | 0.00024  | 0.00055 | 6.56E-01 |
| cg02137691 | 31 | ENSG00000159674 | 0.00001  | 0.00197 | 9.98E-01 | 0.00573  | 0.00348 | 1.00E-01 | 0.00011  | 0.00362 | 9.76E-01 | 0.00029  | 0.00128 | 8.22E-01 | -0.00610 | 0.00334 | 6.80E-02 |
| cg07957088 | 43 | ENSG00000197114 | 0.00107  | 0.00302 | 7.23E-01 | 0.00372  | 0.00638 | 5.59E-01 | -0.00174 | 0.00817 | 8.32E-01 | 0.00107  | 0.00467 | 8.18E-01 | 0.00010  | 0.00643 | 9.87E-01 |
| cg19734370 | 32 | ENSG00000175911 | -0.00001 | 0.00040 | 9.73E-01 | 0.00022  | 0.00039 | 5.76E-01 | 0.00067  | 0.00092 | 4.67E-01 | -0.00136 | 0.00083 | 1.01E-01 | 0.00043  | 0.00190 | 8.23E-01 |
| cg02207312 | 37 | ENSG00000167987 | 0.00001  | 0.00006 | 8.48E-01 | -0.00001 | 0.00013 | 9.22E-01 | 0.00002  | 0.00006 | 8.11E-01 | 0.00011  | 0.00038 | 7.72E-01 | -0.00033 | 0.00090 | 7.12E-01 |
| cg07957088 | 43 | ENSG00000101152 | -0.00289 | 0.00846 | 7.33E-01 | 0.01930  | 0.00758 | 1.09E-02 | -0.03407 | 0.01110 | 2.15E-03 | 0.00083  | 0.00349 | 8.12E-01 | -0.00438 | 0.00914 | 6.32E-01 |
| cg22127773 | 80 | ENSG00000161958 | -0.00011 | 0.00013 | 3.95E-01 | 0.00039  | 0.00105 | 7.08E-01 | 0.00004  | 0.00222 | 9.85E-01 | -0.00011 | 0.00013 | 4.04E-01 | -0.00415 | 0.00271 | 1.26E-01 |
| cg06218079 | 42 | ENSG00000266236 | 0.00014  | 0.00047 | 7.57E-01 | -0.00002 | 0.00064 | 9.79E-01 | 0.00059  | 0.00075 | 4.34E-01 | -0.00022 | 0.00168 | 8.97E-01 | -0.00488 | 0.00431 | 2.57E-01 |
| cg22127773 | 80 | ENSG00000132510 | 0.00038  | 0.00045 | 4.02E-01 | 0.00022  | 0.00057 | 6.94E-01 | 0.00197  | 0.00087 | 2.42E-02 | -0.00015 | 0.00028 | 5.97E-01 | 0.00096  | 0.00331 | 7.72E-01 |
| cg07957088 | 43 | ENSG00000101150 | 0.00049  | 0.00158 | 7.56E-01 | 0.00437  | 0.00395 | 2.68E-01 | -0.00338 | 0.00558 | 5.45E-01 | -0.00003 | 0.00197 | 9.87E-01 | 0.00074  | 0.00475 | 8.76E-01 |
| cg03077331 | 45 | ENSG00000141562 | 0.00038  | 0.00108 | 7.24E-01 | -0.00298 | 0.00889 | 7.38E-01 | 0.00116  | 0.00324 | 7.20E-01 | 0.00043  | 0.00117 | 7.17E-01 | -0.00249 | 0.00672 | 7.11E-01 |
| cg07148038 | 89 | ENSG00000204472 | 0.00150  | 0.00165 | 3.66E-01 | -0.00013 | 0.00543 | 9.81E-01 | 0.00181  | 0.00699 | 7.96E-01 | 0.00102  | 0.00210 | 6.26E-01 | 0.00334  | 0.00344 | 3.32E-01 |
| cg18387671 | 42 | ENSG00000160551 | -0.00003 | 0.00010 | 7.78E-01 | 0.00000  | 0.00015 | 9.94E-01 | 0.00030  | 0.00049 | 5.48E-01 | -0.00012 | 0.00017 | 4.85E-01 | 0.00001  | 0.00029 | 9.63E-01 |
| cg07148038 | 89 | ENSG00000204366 | -0.00043 | 0.00047 | 3.69E-01 | 0.00057  | 0.00117 | 6.28E-01 | -0.00191 | 0.00144 | 1.86E-01 | -0.00041 | 0.00056 | 4.69E-01 | -0.00208 | 0.00444 | 6.40E-01 |
| cg07957088 | 43 | ENSG00000149658 | -0.00018 | 0.00059 | 7.66E-01 | -0.00110 | 0.00144 | 4.45E-01 | 0.00161  | 0.00184 | 3.81E-01 | -0.00289 | 0.00333 | 3.85E-01 | -0.00009 | 0.00071 | 8.95E-01 |
| cg18387671 | 42 | ENSG00000263370 | -0.00003 | 0.00012 | 7.89E-01 | -0.00032 | 0.00039 | 4.10E-01 | -0.00003 | 0.00013 | 8.13E-01 | 0.00001  | 0.00045 | 9.88E-01 | 0.00097  | 0.00078 | 2.12E-01 |
| cg02206852 | 52 | ENSG00000109084 | -0.00022 | 0.00048 | 6.38E-01 | 0.00572  | 0.00726 | 4.31E-01 | -0.00059 | 0.00835 | 9.43E-01 | -0.00013 | 0.00051 | 7.93E-01 | -0.00116 | 0.00142 | 4.14E-01 |
| cg07957088 | 43 | ENSG00000207554 | -0.00098 | 0.00337 | 7.72E-01 | -0.00475 | 0.00284 | 9.37E-02 | 0.00533  | 0.00439 | 2.25E-01 | 0.00560  | 0.00641 | 3.83E-01 | -0.00852 | 0.00590 | 1.49E-01 |
| cg02206852 | 52 | ENSG00000237575 | 0.00155  | 0.00331 | 6.39E-01 | -0.00267 | 0.00324 | 4.09E-01 | 0.02492  | 0.01426 | 8.05E-02 | 0.00554  | 0.00398 | 1.63E-01 | -0.00153 | 0.00455 | 7.36E-01 |
| cg03077331 | 45 | ENSG00000169689 | -0.00017 | 0.00053 | 7.45E-01 | 0.01608  | 0.01184 | 1.74E-01 | -0.00405 | 0.00421 | 3.36E-01 | -0.00001 | 0.00025 | 9.82E-01 | -0.00102 | 0.00135 | 4.49E-01 |
| cg06218079 | 42 | ENSG00000141526 | -0.00004 | 0.00014 | 8.03E-01 | 0.00009  | 0.00019 | 6.25E-01 | 0.00024  | 0.00023 | 2.89E-01 | -0.00028 | 0.00013 | 3.79E-02 | -0.00016 | 0.00061 | 7.99E-01 |
| cg18387671 | 42 | ENSG00000167525 | 0.00001  | 0.00005 | 8.05E-01 | 0.00002  | 0.00010 | 8.08E-01 | -0.00002 | 0.00008 | 8.09E-01 | -0.00001 | 0.00012 | 9.50E-01 | 0.00023  | 0.00020 | 2.52E-01 |
| cg18387671 | 42 | ENSG00000132591 | 0.00007  | 0.00027 | 8.08E-01 | -0.00029 | 0.00038 | 4.53E-01 | 0.00183  | 0.00099 | 6.56E-02 | 0.00007  | 0.00025 | 7.72E-01 | -0.00005 | 0.00095 | 9.56E-01 |
| cg06218079 | 42 | ENSG00000183684 | 0.00001  | 0.00004 | 8.09E-01 | -0.00005 | 0.00005 | 3.01E-01 | 0.00006  | 0.00006 | 2.78E-01 | 0.00011  | 0.00015 | 4.48E-01 | 0.00070  | 0.00084 | 4.00E-01 |
| cg06218079 | 42 | ENSG00000169733 | 0.00012  | 0.00051 | 8.12E-01 | -0.00078 | 0.00084 | 3.50E-01 | -0.00131 | 0.00110 | 2.34E-01 | 0.00055  | 0.00031 | 7.96E-02 | 0.00139  | 0.00099 | 1.59E-01 |
| cg03077331 | 45 | ENSG00000225663 | 0.00025  | 0.00081 | 7.59E-01 | 0.00507  | 0.00788 | 5.20E-01 | 0.00145  | 0.00338 | 6.67E-01 | -0.00055 | 0.00025 | 2.44E-02 | 0.00178  | 0.00121 | 1.41E-01 |
| cg20102034 | 37 | ENSG00000114978 | 0.00016  | 0.00175 | 9.28E-01 | -0.00304 | 0.00433 | 4.83E-01 | 0.00243  | 0.00565 | 6.67E-01 | -0.00011 | 0.00218 | 9.61E-01 | 0.00529  | 0.00574 | 3.57E-01 |
| cg02206852 | 52 | ENSG00000109103 | 0.00085  | 0.00193 | 6.60E-01 | 0.00640  | 0.00466 | 1.69E-01 | -0.01030 | 0.00925 | 2.65E-01 | 0.00013  | 0.00220 | 9.54E-01 | 0.00271  | 0.00952 | 7.76E-01 |
| cg20102034 | 37 | ENSG00000159374 | -0.00005 | 0.00052 | 9.31E-01 | 0.00025  | 0.00076 | 7.45E-01 | -0.00047 | 0.00091 | 6.01E-01 | -0.00020 | 0.00134 | 8.82E-01 | 0.00050  | 0.00231 | 8.28E-01 |
| cg06218079 | 42 | ENSG00000169689 | 0.00020  | 0.00088 | 8.21E-01 | -0.00074 | 0.00119 | 5.35E-01 | -0.00012 | 0.00120 | 9.19E-01 | -0.00031 | 0.00065 | 6.38E-01 | 0.00692  | 0.00288 | 1.61E-02 |
| cg22127773 | 80 | ENSG00000233223 | 0.00027  | 0.00035 | 4.32E-01 | 0.00003  | 0.00046 | 9.53E-01 | 0.00274  | 0.00177 | 1.23E-01 | 0.00020  | 0.00035 | 5.70E-01 | 0.00392  | 0.00312 | 2.08E-01 |
| cg18387671 | 42 | ENSG00000126653 | -0.00004 | 0.00020 | 8.27E-01 | 0.00039  | 0.00021 | 5.74E-02 | -0.00082 | 0.00107 | 4.47E-01 | -0.00013 | 0.00011 | 2.06E-01 | -0.00043 | 0.00035 | 2.09E-01 |
| cg22127773 | 80 | ENSG00000220205 | 0.00027  | 0.00034 | 4.38E-01 | -0.00069 | 0.00097 | 4.79E-01 | -0.00091 | 0.00231 | 6.93E-01 | 0.00044  | 0.00038 | 2.40E-01 | 0.00045  | 0.00439 | 9.18E-01 |
| cg03077331 | 45 | ENSG00000261888 | -0.00038 | 0.00138 | 7.82E-01 | 0.00222  | 0.00407 | 5.86E-01 | -0.00106 | 0.00175 | 5.44E-01 | 0.00050  | 0.00270 | 8.52E-01 | -0.01074 | 0.01357 | 4.29E-01 |
| cg03077331 | 45 | ENSG00000141552 | -0.00037 | 0.00138 | 7.86E-01 | -0.00405 | 0.01109 | 7.15E-01 | -0.00036 | 0.00453 | 9.36E-01 | -0.00018 | 0.00148 | 9.05E-01 | -0.00533 | 0.00901 | 5.54E-01 |
| cg06218079 | 42 | ENSG00000167363 | -0.00032 | 0.00161 | 8.42E-01 | 0.00126  | 0.00105 | 2.29E-01 | 0.00134  | 0.00101 | 1.87E-01 | -0.00393 | 0.00094 | 3.02E-05 | 0.00073  | 0.00361 | 8.39E-01 |
| cg07148038 | 89 | ENSG00000206337 | 0.00066  | 0.00078 | 3.98E-01 | 0.00084  | 0.00081 | 2.96E-01 | -0.00096 | 0.00856 | 9.11E-01 | -0.00175 | 0.00343 | 6.10E-01 | -0.00220 | 0.00700 | 7.53E-01 |
| cg07957088 | 43 | ENSG00000203880 | 0.00025  | 0.00111 | 8.24E-01 | 0.01129  | 0.01180 | 3.39E-01 | 0.00272  | 0.01677 | 8.71E-01 | -0.00304 | 0.00252 | 2.28E-01 | 0.00091  | 0.00125 | 4.64E-01 |
| cg20102034 | 37 | ENSG00000115282 | 0.00018  | 0.00346 | 9.60E-01 | 0.00820  | 0.00686 | 2.32E-01 | -0.00573 | 0.00836 | 4.93E-01 | 0.00207  | 0.00306 | 4.99E-01 | -0.01118 | 0.00812 | 1.69E-01 |
| cg07957088 | 43 | ENSG00000101197 | -0.00092 | 0.00421 | 8.26E-01 | 0.00465  | 0.00787 | 5.55E-01 | -0.00052 | 0.00982 | 9.58E-01 | 0.00333  | 0.00286 | 2.45E-01 | -0.01255 | 0.00612 | 4.04E-02 |

|            |    |                 |          |         |          |          |         |          |          |         |          |          |         |          |          |         |          |
|------------|----|-----------------|----------|---------|----------|----------|---------|----------|----------|---------|----------|----------|---------|----------|----------|---------|----------|
| cg07148038 | 89 | ENSG00000204469 | -0.00130 | 0.00154 | 4.00E-01 | -0.00063 | 0.00248 | 7.98E-01 | -0.01127 | 0.00607 | 6.35E-02 | -0.00096 | 0.00228 | 6.73E-01 | 0.00105  | 0.00488 | 8.29E-01 |
| cg22127773 | 80 | ENSG00000161960 | -0.00017 | 0.00022 | 4.49E-01 | -0.00014 | 0.00027 | 6.12E-01 | -0.00015 | 0.00047 | 7.58E-01 | -0.00081 | 0.00087 | 3.48E-01 | 0.00016  | 0.00096 | 8.65E-01 |
| cg07957088 | 43 | ENSG00000225978 | 0.00016  | 0.00081 | 8.39E-01 | -0.00464 | 0.00845 | 5.83E-01 | -0.01265 | 0.01222 | 3.01E-01 | 0.00032  | 0.00081 | 6.97E-01 | -0.01465 | 0.01382 | 2.89E-01 |
| cg18387671 | 42 | ENSG00000076604 | -0.00009 | 0.00049 | 8.61E-01 | -0.00083 | 0.00050 | 9.62E-02 | -0.00038 | 0.00042 | 3.64E-01 | 0.00093  | 0.00027 | 5.28E-04 | -0.00036 | 0.00083 | 6.70E-01 |
| cg02207312 | 37 | ENSG00000149476 | 0.00000  | 0.00009 | 9.80E-01 | 0.00000  | 0.00073 | 1.00E+00 | 0.00031  | 0.00025 | 2.16E-01 | -0.00008 | 0.00010 | 4.46E-01 | 0.00022  | 0.00028 | 4.23E-01 |
| cg02207312 | 37 | ENSG00000166927 | 0.00000  | 0.00004 | 9.81E-01 | -0.00088 | 0.00065 | 1.75E-01 | -0.00002 | 0.00014 | 9.14E-01 | -0.00001 | 0.00005 | 8.06E-01 | 0.00003  | 0.00007 | 6.10E-01 |
| cg03077331 | 45 | ENSG00000268852 | 0.00042  | 0.00173 | 8.08E-01 | -0.00807 | 0.00807 | 3.17E-01 | -0.00353 | 0.00335 | 2.93E-01 | 0.00139  | 0.00229 | 5.43E-01 | 0.00301  | 0.00259 | 2.46E-01 |
| cg07957088 | 43 | ENSG00000101199 | 0.00010  | 0.00054 | 8.47E-01 | -0.00181 | 0.00831 | 8.28E-01 | -0.00060 | 0.01083 | 9.56E-01 | 0.00014  | 0.00059 | 8.11E-01 | -0.00003 | 0.00136 | 9.83E-01 |
| cg02206852 | 52 | ENSG00000232859 | -0.00027 | 0.00069 | 7.00E-01 | 0.00887  | 0.01132 | 4.33E-01 | -0.00036 | 0.00525 | 9.45E-01 | -0.00035 | 0.00070 | 6.21E-01 | 0.00971  | 0.01031 | 3.46E-01 |
| cg18387671 | 42 | ENSG00000264304 | 0.00002  | 0.00011 | 8.72E-01 | -0.00012 | 0.00020 | 5.50E-01 | 0.00162  | 0.00159 | 3.07E-01 | 0.00001  | 0.00006 | 8.18E-01 | 0.00099  | 0.00065 | 1.31E-01 |
| cg20102034 | 37 | ENSG00000159399 | 0.00000  | 0.00077 | 9.95E-01 | 0.00022  | 0.00154 | 8.84E-01 | 0.00242  | 0.00204 | 2.35E-01 | -0.00125 | 0.00053 | 1.95E-02 | 0.00076  | 0.00098 | 4.41E-01 |
| cg03077331 | 45 | ENSG00000181396 | -0.00014 | 0.00062 | 8.19E-01 | -0.00108 | 0.00206 | 5.99E-01 | 0.00027  | 0.00075 | 7.13E-01 | -0.00130 | 0.00140 | 3.54E-01 | 0.00158  | 0.00526 | 7.63E-01 |
| cg20102034 | 37 | ENSG00000179528 | -0.00001 | 0.00631 | 9.99E-01 | -0.00359 | 0.00787 | 6.49E-01 | 0.03424  | 0.01292 | 8.06E-03 | -0.00779 | 0.00395 | 4.86E-02 | -0.00570 | 0.00641 | 3.75E-01 |
| cg03077331 | 45 | ENSG00000169710 | -0.00019 | 0.00084 | 8.24E-01 | 0.00584  | 0.00551 | 2.89E-01 | 0.00076  | 0.00208 | 7.14E-01 | -0.00052 | 0.00094 | 5.82E-01 | -0.00188 | 0.00612 | 7.59E-01 |
| cg06218079 | 42 | ENSG00000169696 | -0.00005 | 0.00033 | 8.86E-01 | -0.00198 | 0.00124 | 1.12E-01 | -0.00041 | 0.00133 | 7.60E-01 | -0.00007 | 0.00013 | 5.78E-01 | 0.00073  | 0.00061 | 2.34E-01 |
| cg22127773 | 80 | ENSG00000170291 | 0.00015  | 0.00020 | 4.70E-01 | -0.00112 | 0.00158 | 4.79E-01 | 0.00012  | 0.00112 | 9.11E-01 | 0.00016  | 0.00021 | 4.57E-01 | 0.00113  | 0.00177 | 5.24E-01 |
| cg03077331 | 45 | ENSG00000176155 | -0.00028 | 0.00138 | 8.37E-01 | 0.00973  | 0.01175 | 4.08E-01 | 0.00079  | 0.00386 | 8.39E-01 | -0.00087 | 0.00152 | 5.66E-01 | 0.00466  | 0.00669 | 4.87E-01 |
| cg07957088 | 43 | ENSG00000101191 | 0.00055  | 0.00358 | 8.78E-01 | 0.00464  | 0.00700 | 5.08E-01 | 0.00981  | 0.00866 | 2.58E-01 | -0.00555 | 0.00419 | 1.85E-01 | 0.00376  | 0.00808 | 6.41E-01 |
| cg18387671 | 42 | ENSG00000167549 | -0.00003 | 0.00024 | 9.00E-01 | 0.00014  | 0.00059 | 8.12E-01 | -0.00118 | 0.00117 | 3.14E-01 | -0.00021 | 0.00028 | 4.50E-01 | 0.00071  | 0.00056 | 2.05E-01 |
| cg06218079 | 42 | ENSG00000173762 | 0.00001  | 0.00009 | 9.03E-01 | 0.00015  | 0.00021 | 4.61E-01 | -0.00002 | 0.00024 | 9.36E-01 | -0.00001 | 0.00011 | 9.06E-01 | -0.00010 | 0.00036 | 7.76E-01 |
| cg18387671 | 42 | ENSG00000108578 | -0.00002 | 0.00015 | 9.05E-01 | -0.00004 | 0.00036 | 9.07E-01 | 0.00005  | 0.00020 | 7.94E-01 | -0.00025 | 0.00030 | 4.07E-01 | 0.00046  | 0.00069 | 5.03E-01 |
| cg07148038 | 89 | ENSG00000204428 | -0.00248 | 0.00313 | 4.28E-01 | 0.00076  | 0.00296 | 7.98E-01 | -0.02290 | 0.01233 | 6.34E-02 | -0.00332 | 0.00430 | 4.40E-01 | -0.00599 | 0.01281 | 6.40E-01 |
| cg06218079 | 42 | ENSG00000183010 | -0.00002 | 0.00015 | 9.10E-01 | 0.00004  | 0.00022 | 8.56E-01 | -0.00006 | 0.00023 | 7.90E-01 | -0.00011 | 0.00075 | 8.85E-01 | -0.00121 | 0.00237 | 6.10E-01 |
| cg18387671 | 42 | ENSG00000168792 | 0.00000  | 0.00004 | 9.11E-01 | 0.00000  | 0.00005 | 9.32E-01 | -0.00087 | 0.00089 | 3.28E-01 | 0.00007  | 0.00035 | 8.37E-01 | 0.00060  | 0.00073 | 4.14E-01 |
| cg18387671 | 42 | ENSG00000221995 | 0.00004  | 0.00039 | 9.12E-01 | 0.00030  | 0.00046 | 5.14E-01 | 0.00196  | 0.00099 | 4.73E-02 | -0.00003 | 0.00013 | 7.83E-01 | -0.00131 | 0.00067 | 5.11E-02 |
| cg22127773 | 80 | ENSG00000181885 | 0.00061  | 0.00086 | 4.79E-01 | 0.00062  | 0.00084 | 4.61E-01 | 0.00288  | 0.00135 | 3.31E-02 | -0.00101 | 0.00101 | 3.18E-01 | 0.00013  | 0.00381 | 9.74E-01 |
| cg06218079 | 42 | ENSG00000141568 | -0.00009 | 0.00087 | 9.15E-01 | -0.00030 | 0.00093 | 7.50E-01 | -0.00167 | 0.00098 | 8.73E-02 | -0.00007 | 0.00063 | 9.16E-01 | 0.00725  | 0.00307 | 1.83E-02 |
| cg06218079 | 42 | ENSG00000169718 | 0.00004  | 0.00040 | 9.23E-01 | -0.00043 | 0.00058 | 4.54E-01 | 0.00027  | 0.00063 | 6.62E-01 | -0.00002 | 0.00051 | 9.62E-01 | 0.00494  | 0.00270 | 6.72E-02 |
| cg22127773 | 80 | ENSG00000182224 | -0.00013 | 0.00019 | 4.86E-01 | -0.00236 | 0.00148 | 1.12E-01 | 0.00120  | 0.00219 | 5.84E-01 | -0.00010 | 0.00019 | 6.02E-01 | -0.00118 | 0.00289 | 6.83E-01 |
| cg18387671 | 42 | ENSG00000108256 | 0.00001  | 0.00015 | 9.31E-01 | 0.00021  | 0.00028 | 4.59E-01 | -0.00061 | 0.00083 | 4.59E-01 | -0.00008 | 0.00019 | 6.83E-01 | 0.00026  | 0.00051 | 6.03E-01 |
| cg03077331 | 45 | ENSG00000266236 | 0.00009  | 0.00053 | 8.73E-01 | 0.01066  | 0.01500 | 4.77E-01 | -0.00522 | 0.00632 | 4.09E-01 | 0.00007  | 0.00054 | 8.91E-01 | 0.00219  | 0.00411 | 5.94E-01 |
| cg22127773 | 80 | ENSG00000262251 | -0.00033 | 0.00049 | 4.91E-01 | -0.00150 | 0.00149 | 3.13E-01 | -0.00200 | 0.00194 | 3.03E-01 | -0.00022 | 0.00031 | 4.78E-01 | 0.00329  | 0.00265 | 2.13E-01 |
| cg22127773 | 80 | ENSG00000215067 | -0.00026 | 0.00037 | 4.92E-01 | -0.00022 | 0.00040 | 5.85E-01 | 0.00350  | 0.00296 | 2.37E-01 | -0.00123 | 0.00119 | 3.01E-01 | 0.00003  | 0.00453 | 9.95E-01 |
| cg18387671 | 42 | ENSG00000265625 | 0.00002  | 0.00027 | 9.39E-01 | -0.00021 | 0.00027 | 4.44E-01 | 0.00255  | 0.00159 | 1.08E-01 | 0.00038  | 0.00044 | 3.89E-01 | -0.00021 | 0.00046 | 6.52E-01 |
| cg03077331 | 45 | ENSG00000185813 | -0.00018 | 0.00116 | 8.77E-01 | -0.00675 | 0.00828 | 4.15E-01 | -0.00165 | 0.00424 | 6.97E-01 | 0.00014  | 0.00124 | 9.10E-01 | -0.00140 | 0.00635 | 8.26E-01 |
| cg07957088 | 43 | ENSG00000196700 | 0.00029  | 0.00293 | 9.20E-01 | -0.00383 | 0.00576 | 5.06E-01 | -0.01842 | 0.01079 | 8.80E-02 | 0.00075  | 0.00292 | 7.96E-01 | 0.00467  | 0.00233 | 4.54E-02 |
| cg18387671 | 42 | ENSG00000264290 | 0.00001  | 0.00019 | 9.48E-01 | 0.00078  | 0.00084 | 3.54E-01 | 0.00027  | 0.00079 | 7.33E-01 | 0.00034  | 0.00032 | 2.79E-01 | -0.00020 | 0.00013 | 1.22E-01 |
| cg06218079 | 42 | ENSG00000141542 | -0.00002 | 0.00032 | 9.54E-01 | 0.00024  | 0.00062 | 6.99E-01 | -0.00017 | 0.00055 | 7.55E-01 | -0.00011 | 0.00053 | 8.29E-01 | 0.00046  | 0.00163 | 7.78E-01 |
| cg03077331 | 45 | ENSG00000197063 | -0.00012 | 0.00088 | 8.94E-01 | 0.00021  | 0.00124 | 8.63E-01 | 0.00079  | 0.00059 | 1.77E-01 | -0.00158 | 0.00140 | 2.60E-01 | -0.01199 | 0.00720 | 9.62E-02 |
| cg06218079 | 42 | ENSG00000169683 | 0.00001  | 0.00027 | 9.61E-01 | -0.00034 | 0.00044 | 4.36E-01 | -0.00022 | 0.00043 | 6.16E-01 | 0.00016  | 0.00025 | 5.25E-01 | 0.00271  | 0.00152 | 7.40E-02 |
| cg07148038 | 89 | ENSG00000204390 | -0.00368 | 0.00492 | 4.54E-01 | -0.01222 | 0.00513 | 1.73E-02 | 0.00487  | 0.00623 | 4.34E-01 | -0.01095 | 0.00284 | 1.16E-04 | 0.00776  | 0.00641 | 2.26E-01 |
| cg18387671 | 42 | ENSG00000132581 | -0.00001 | 0.00019 | 9.68E-01 | 0.00006  | 0.00057 | 9.09E-01 | 0.00027  | 0.00033 | 4.09E-01 | -0.00011 | 0.00028 | 6.82E-01 | -0.00068 | 0.00068 | 3.17E-01 |

|            |    |                 |          |         |          |          |         |          |          |         |          |          |         |          |          |         |          |
|------------|----|-----------------|----------|---------|----------|----------|---------|----------|----------|---------|----------|----------|---------|----------|----------|---------|----------|
| cg22127773 | 80 | ENSG00000161956 | 0.00007  | 0.00010 | 5.08E-01 | 0.00013  | 0.00012 | 2.70E-01 | -0.00016 | 0.00023 | 4.90E-01 | -0.00020 | 0.00104 | 8.47E-01 | 0.00006  | 0.00037 | 8.80E-01 |
| cg02206852 | 52 | ENSG00000264577 | 0.00070  | 0.00254 | 7.84E-01 | -0.00141 | 0.00593 | 8.13E-01 | 0.00277  | 0.00431 | 5.20E-01 | 0.00192  | 0.00467 | 6.81E-01 | -0.00326 | 0.00605 | 5.90E-01 |
| cg18387671 | 42 | ENSG00000176927 | 0.00000  | 0.00004 | 9.73E-01 | 0.00002  | 0.00010 | 8.28E-01 | -0.00066 | 0.00080 | 4.10E-01 | 0.00003  | 0.00005 | 5.15E-01 | -0.00008 | 0.00008 | 3.00E-01 |
| cg06218079 | 42 | ENSG00000181396 | -0.00001 | 0.00018 | 9.75E-01 | 0.00005  | 0.00084 | 9.54E-01 | 0.00085  | 0.00103 | 4.13E-01 | -0.00018 | 0.00011 | 9.99E-02 | 0.00040  | 0.00033 | 2.22E-01 |
| cg22127773 | 80 | ENSG00000129245 | -0.00029 | 0.00044 | 5.12E-01 | -0.00026 | 0.00077 | 7.31E-01 | -0.00111 | 0.00122 | 3.66E-01 | 0.00003  | 0.00062 | 9.65E-01 | -0.00614 | 0.00414 | 1.38E-01 |
| cg07957088 | 43 | ENSG00000101194 | 0.00004  | 0.00094 | 9.65E-01 | 0.00151  | 0.00294 | 6.08E-01 | -0.00065 | 0.00355 | 8.54E-01 | -0.00003 | 0.00108 | 9.79E-01 | -0.00056 | 0.00330 | 8.66E-01 |
| cg03077331 | 45 | ENSG00000260563 | 0.00020  | 0.00259 | 9.39E-01 | -0.00178 | 0.01675 | 9.15E-01 | 0.00358  | 0.00660 | 5.87E-01 | 0.00187  | 0.00108 | 8.26E-02 | -0.00969 | 0.00586 | 9.79E-02 |
| cg22127773 | 80 | ENSG00000174292 | 0.00075  | 0.00119 | 5.29E-01 | 0.00088  | 0.00069 | 1.99E-01 | 0.00648  | 0.00431 | 1.33E-01 | -0.00014 | 0.00193 | 9.44E-01 | -0.01026 | 0.00771 | 1.83E-01 |
| cg07957088 | 43 | ENSG00000232442 | -0.00006 | 0.00350 | 9.87E-01 | 0.00467  | 0.01308 | 7.21E-01 | -0.01746 | 0.01706 | 3.06E-01 | 0.00495  | 0.00749 | 5.09E-01 | -0.00110 | 0.00428 | 7.97E-01 |
| cg22127773 | 80 | ENSG00000170296 | 0.00041  | 0.00065 | 5.32E-01 | 0.00018  | 0.00081 | 8.26E-01 | 0.00149  | 0.00313 | 6.34E-01 | 0.00081  | 0.00119 | 4.94E-01 | -0.00088 | 0.00505 | 8.61E-01 |
| cg07148038 | 89 | ENSG00000223865 | 0.00151  | 0.00213 | 4.78E-01 | 0.00011  | 0.00574 | 9.85E-01 | -0.00198 | 0.00216 | 3.59E-01 | 0.00428  | 0.00120 | 3.66E-04 | 0.00252  | 0.00604 | 6.76E-01 |
| cg07957088 | 43 | ENSG00000101161 | 0.00001  | 0.00116 | 9.95E-01 | 0.00201  | 0.00139 | 1.46E-01 | -0.00378 | 0.00213 | 7.49E-02 | -0.00090 | 0.00080 | 2.60E-01 | 0.00217  | 0.00180 | 2.28E-01 |
| cg03077331 | 45 | ENSG00000266445 | 0.00004  | 0.00090 | 9.63E-01 | 0.00126  | 0.00287 | 6.60E-01 | 0.00057  | 0.00118 | 6.30E-01 | -0.00131 | 0.00163 | 4.22E-01 | -0.00236 | 0.01200 | 8.44E-01 |
| cg07148038 | 89 | ENSG00000204287 | -0.00144 | 0.00207 | 4.87E-01 | -0.00315 | 0.00432 | 4.66E-01 | 0.00845  | 0.00592 | 1.53E-01 | -0.00227 | 0.00220 | 3.01E-01 | -0.00525 | 0.00758 | 4.88E-01 |
| cg07148038 | 89 | ENSG00000204444 | 0.00254  | 0.00366 | 4.88E-01 | 0.01488  | 0.00675 | 2.74E-02 | 0.00429  | 0.00596 | 4.71E-01 | 0.00082  | 0.00249 | 7.41E-01 | -0.00748 | 0.00643 | 2.45E-01 |
| cg02206852 | 52 | ENSG00000198242 | -0.00034 | 0.00165 | 8.37E-01 | -0.01251 | 0.01011 | 2.16E-01 | -0.00997 | 0.00733 | 1.74E-01 | 0.00042  | 0.00287 | 8.83E-01 | 0.00054  | 0.00134 | 6.85E-01 |
| cg22127773 | 80 | ENSG00000262943 | -0.00043 | 0.00073 | 5.52E-01 | 0.00019  | 0.00044 | 6.58E-01 | -0.00151 | 0.00285 | 5.96E-01 | -0.00079 | 0.00096 | 4.13E-01 | -0.00849 | 0.00465 | 6.76E-02 |
| cg03077331 | 45 | ENSG00000141560 | -0.00002 | 0.00115 | 9.89E-01 | -0.00055 | 0.00722 | 9.40E-01 | -0.00147 | 0.00256 | 5.67E-01 | 0.00018  | 0.00134 | 8.91E-01 | 0.00481  | 0.00634 | 4.48E-01 |
| cg02206852 | 52 | ENSG00000264098 | 0.00091  | 0.00543 | 8.67E-01 | 0.00394  | 0.00734 | 5.91E-01 | 0.00554  | 0.00697 | 4.26E-01 | 0.00721  | 0.00431 | 9.45E-02 | -0.00995 | 0.00258 | 1.14E-04 |
| cg22127773 | 80 | ENSG00000198150 | 0.00015  | 0.00026 | 5.66E-01 | 0.00176  | 0.00115 | 1.25E-01 | -0.00006 | 0.00036 | 8.58E-01 | 0.00027  | 0.00057 | 6.35E-01 | 0.00017  | 0.00057 | 7.61E-01 |
| cg22127773 | 80 | ENSG00000258315 | -0.00028 | 0.00049 | 5.68E-01 | -0.00224 | 0.00161 | 1.64E-01 | -0.00013 | 0.00072 | 8.54E-01 | 0.00043  | 0.00092 | 6.43E-01 | -0.00082 | 0.00122 | 5.05E-01 |
| cg22127773 | 80 | ENSG00000175826 | -0.00034 | 0.00060 | 5.72E-01 | 0.00176  | 0.00105 | 9.47E-02 | -0.00099 | 0.00076 | 1.92E-01 | -0.00023 | 0.00033 | 4.95E-01 | -0.00235 | 0.00137 | 8.66E-02 |
| cg22127773 | 80 | ENSG00000161939 | -0.00009 | 0.00016 | 5.73E-01 | -0.00069 | 0.00082 | 4.00E-01 | 0.00104  | 0.00132 | 4.28E-01 | -0.00007 | 0.00016 | 6.61E-01 | -0.00334 | 0.00276 | 2.26E-01 |
| cg07148038 | 89 | ENSG00000204264 | 0.00222  | 0.00343 | 5.17E-01 | 0.01431  | 0.00640 | 2.53E-02 | -0.00046 | 0.00756 | 9.52E-01 | 0.00177  | 0.00247 | 4.74E-01 | -0.00514 | 0.00548 | 3.48E-01 |
| cg07148038 | 89 | ENSG00000231389 | -0.00078 | 0.00121 | 5.21E-01 | 0.00104  | 0.00453 | 8.18E-01 | 0.00111  | 0.00247 | 6.55E-01 | -0.00153 | 0.00147 | 2.99E-01 | -0.00496 | 0.00931 | 5.94E-01 |
| cg02206852 | 52 | ENSG00000007202 | 0.00019  | 0.00159 | 9.05E-01 | 0.00107  | 0.00616 | 8.62E-01 | -0.00247 | 0.00756 | 7.44E-01 | -0.00013 | 0.00172 | 9.39E-01 | 0.00882  | 0.00808 | 2.75E-01 |
| cg07148038 | 89 | ENSG00000204435 | -0.00168 | 0.00274 | 5.40E-01 | 0.01091  | 0.00824 | 1.86E-01 | -0.00295 | 0.00231 | 2.02E-01 | 0.00133  | 0.00110 | 2.25E-01 | -0.00902 | 0.00337 | 7.47E-03 |
| cg07148038 | 89 | ENSG00000204520 | 0.00064  | 0.00104 | 5.40E-01 | 0.00187  | 0.00096 | 5.13E-02 | -0.00607 | 0.00415 | 1.43E-01 | 0.00016  | 0.00148 | 9.14E-01 | 0.00010  | 0.00275 | 9.72E-01 |
| cg22127773 | 80 | ENSG00000205544 | 0.00030  | 0.00058 | 6.09E-01 | 0.00076  | 0.00068 | 2.61E-01 | -0.00202 | 0.00277 | 4.65E-01 | -0.00054 | 0.00131 | 6.81E-01 | -0.00184 | 0.00310 | 5.52E-01 |
| cg22127773 | 80 | ENSG00000179593 | -0.00025 | 0.00049 | 6.11E-01 | -0.00152 | 0.00089 | 8.73E-02 | -0.00077 | 0.00128 | 5.50E-01 | 0.00018  | 0.00033 | 5.75E-01 | 0.00147  | 0.00213 | 4.90E-01 |
| cg02206852 | 52 | ENSG00000076351 | -0.00005 | 0.00068 | 9.41E-01 | 0.00743  | 0.00669 | 2.66E-01 | -0.00004 | 0.00467 | 9.93E-01 | -0.00007 | 0.00069 | 9.14E-01 | -0.01118 | 0.00975 | 2.51E-01 |
| cg22127773 | 80 | ENSG00000214999 | -0.00032 | 0.00064 | 6.14E-01 | -0.00209 | 0.00136 | 1.23E-01 | -0.00006 | 0.00250 | 9.81E-01 | 0.00021  | 0.00079 | 7.94E-01 | 0.00028  | 0.00292 | 9.23E-01 |
| cg02206852 | 52 | ENSG00000004142 | -0.00014 | 0.00227 | 9.51E-01 | -0.00460 | 0.00355 | 1.95E-01 | -0.00427 | 0.00375 | 2.55E-01 | 0.00342  | 0.00200 | 8.70E-02 | 0.00276  | 0.00383 | 4.72E-01 |
| cg07148038 | 89 | ENSG00000196735 | -0.00231 | 0.00393 | 5.56E-01 | 0.00419  | 0.00404 | 2.99E-01 | -0.01377 | 0.00491 | 5.01E-03 | -0.00471 | 0.00270 | 8.06E-02 | 0.00559  | 0.00544 | 3.04E-01 |
| cg07148038 | 89 | ENSG00000204525 | -0.00132 | 0.00227 | 5.62E-01 | -0.00557 | 0.00302 | 6.55E-02 | 0.00636  | 0.00667 | 3.40E-01 | -0.00396 | 0.00236 | 9.29E-02 | 0.00161  | 0.00125 | 1.97E-01 |
| cg07148038 | 89 | ENSG00000204305 | -0.00150 | 0.00269 | 5.78E-01 | -0.00383 | 0.00454 | 4.00E-01 | -0.01883 | 0.00694 | 6.64E-03 | -0.00009 | 0.00120 | 9.40E-01 | 0.00391  | 0.00188 | 3.71E-02 |
| cg22127773 | 80 | ENSG00000266824 | -0.00016 | 0.00034 | 6.44E-01 | -0.00112 | 0.00098 | 2.53E-01 | -0.00065 | 0.00074 | 3.85E-01 | 0.00023  | 0.00027 | 4.00E-01 | -0.00122 | 0.00134 | 3.65E-01 |
| cg07148038 | 89 | ENSG00000226979 | -0.00147 | 0.00265 | 5.79E-01 | 0.00668  | 0.00563 | 2.35E-01 | -0.01097 | 0.00285 | 1.21E-04 | -0.00009 | 0.00125 | 9.42E-01 | 0.00119  | 0.00178 | 5.05E-01 |
| cg22127773 | 80 | ENSG00000170004 | 0.00037  | 0.00080 | 6.49E-01 | -0.00030 | 0.00122 | 8.05E-01 | 0.00305  | 0.00274 | 2.65E-01 | 0.00051  | 0.00121 | 6.75E-01 | 0.00029  | 0.00389 | 9.40E-01 |
| cg02206852 | 52 | ENSG00000167549 | 0.00000  | 0.00021 | 9.98E-01 | -0.00044 | 0.00172 | 7.98E-01 | -0.00593 | 0.00392 | 1.31E-01 | 0.00008  | 0.00025 | 7.36E-01 | -0.00015 | 0.00043 | 7.28E-01 |
| cg07148038 | 89 | ENSG00000168477 | -0.00069 | 0.00134 | 6.03E-01 | -0.00480 | 0.00315 | 1.27E-01 | -0.00146 | 0.00426 | 7.32E-01 | 0.00096  | 0.00171 | 5.76E-01 | -0.00239 | 0.00398 | 5.47E-01 |
| cg07148038 | 89 | ENSG00000198563 | 0.00129  | 0.00258 | 6.15E-01 | 0.00368  | 0.00639 | 5.65E-01 | 0.01135  | 0.00911 | 2.13E-01 | -0.00018 | 0.00314 | 9.54E-01 | -0.00104 | 0.00880 | 9.06E-01 |

|            |    |                 |          |         |          |          |         |          |          |         |          |          |         |          |          |         |          |
|------------|----|-----------------|----------|---------|----------|----------|---------|----------|----------|---------|----------|----------|---------|----------|----------|---------|----------|
| cg22127773 | 80 | ENSG00000170043 | -0.00005 | 0.00014 | 6.91E-01 | 0.00045  | 0.00105 | 6.67E-01 | -0.00040 | 0.00036 | 2.75E-01 | -0.00001 | 0.00015 | 9.63E-01 | -0.00001 | 0.00065 | 9.92E-01 |
| cg07148038 | 89 | ENSG00000198502 | -0.00094 | 0.00192 | 6.24E-01 | 0.00344  | 0.00499 | 4.90E-01 | -0.00547 | 0.00629 | 3.84E-01 | -0.00129 | 0.00238 | 5.89E-01 | -0.00098 | 0.00580 | 8.66E-01 |
| cg22127773 | 80 | ENSG00000132518 | -0.00017 | 0.00044 | 6.96E-01 | -0.00219 | 0.00156 | 1.59E-01 | -0.00161 | 0.00275 | 5.57E-01 | -0.00001 | 0.00015 | 9.49E-01 | 0.00447  | 0.00462 | 3.33E-01 |
| cg07148038 | 89 | ENSG00000237541 | 0.00083  | 0.00173 | 6.30E-01 | 0.00291  | 0.00369 | 4.31E-01 | -0.00263 | 0.00178 | 1.40E-01 | 0.00108  | 0.00091 | 2.35E-01 | 0.01086  | 0.00599 | 7.01E-02 |
| cg22127773 | 80 | ENSG00000178971 | -0.00027 | 0.00076 | 7.22E-01 | 0.00034  | 0.00097 | 7.26E-01 | -0.00160 | 0.00284 | 5.74E-01 | -0.00139 | 0.00140 | 3.20E-01 | 0.00255  | 0.00567 | 6.54E-01 |
| cg22127773 | 80 | ENSG00000161970 | -0.00002 | 0.00005 | 7.24E-01 | -0.00006 | 0.00006 | 3.61E-01 | 0.00011  | 0.00012 | 3.81E-01 | 0.00002  | 0.00017 | 8.83E-01 | 0.00000  | 0.00021 | 9.83E-01 |
| cg22127773 | 80 | ENSG00000262089 | 0.00040  | 0.00115 | 7.31E-01 | 0.00145  | 0.00105 | 1.68E-01 | 0.00526  | 0.00357 | 1.41E-01 | -0.00068 | 0.00044 | 1.24E-01 | -0.00686 | 0.00566 | 2.25E-01 |
| cg07148038 | 89 | ENSG00000204314 | -0.00031 | 0.00074 | 6.76E-01 | 0.00096  | 0.00111 | 3.89E-01 | 0.00121  | 0.00152 | 4.23E-01 | -0.00176 | 0.00042 | 2.23E-05 | -0.00024 | 0.00067 | 7.26E-01 |
| cg07148038 | 89 | ENSG00000204386 | -0.00039 | 0.00094 | 6.77E-01 | -0.00435 | 0.00274 | 1.12E-01 | -0.00425 | 0.00364 | 2.43E-01 | 0.00088  | 0.00171 | 6.08E-01 | 0.00019  | 0.00034 | 5.82E-01 |
| cg07148038 | 89 | ENSG00000204420 | -0.00161 | 0.00389 | 6.78E-01 | 0.00155  | 0.00679 | 8.20E-01 | 0.00168  | 0.00929 | 8.57E-01 | -0.01006 | 0.00394 | 1.06E-02 | 0.00281  | 0.00291 | 3.34E-01 |
| cg07148038 | 89 | ENSG00000204388 | -0.00155 | 0.00374 | 6.79E-01 | 0.00171  | 0.00390 | 6.61E-01 | -0.00185 | 0.00543 | 7.34E-01 | -0.00946 | 0.00248 | 1.35E-04 | 0.00355  | 0.00192 | 6.49E-02 |
| cg22127773 | 80 | ENSG00000141499 | 0.00019  | 0.00062 | 7.63E-01 | 0.00001  | 0.00105 | 9.92E-01 | 0.00440  | 0.00230 | 5.54E-02 | -0.00020 | 0.00036 | 5.73E-01 | 0.00066  | 0.00362 | 8.54E-01 |
| cg22127773 | 80 | ENSG00000269928 | 0.00017  | 0.00057 | 7.68E-01 | 0.00112  | 0.00087 | 1.98E-01 | 0.00146  | 0.00197 | 4.58E-01 | -0.00064 | 0.00059 | 2.85E-01 | 0.00157  | 0.00365 | 6.68E-01 |
| cg07148038 | 89 | ENSG00000213654 | -0.00035 | 0.00088 | 6.90E-01 | 0.00697  | 0.00651 | 2.84E-01 | -0.00176 | 0.00108 | 1.04E-01 | 0.00005  | 0.00043 | 9.10E-01 | 0.00719  | 0.00721 | 3.18E-01 |
| cg07148038 | 89 | ENSG00000227939 | -0.00064 | 0.00163 | 6.94E-01 | -0.00133 | 0.00196 | 4.97E-01 | -0.00101 | 0.01075 | 9.25E-01 | 0.00089  | 0.00377 | 8.13E-01 | 0.00131  | 0.00507 | 7.96E-01 |
| cg07148038 | 89 | ENSG00000204536 | -0.00048 | 0.00124 | 6.97E-01 | -0.00102 | 0.00645 | 8.74E-01 | -0.00077 | 0.00118 | 5.11E-01 | 0.00088  | 0.00064 | 1.67E-01 | -0.00966 | 0.00471 | 4.02E-02 |
| cg07148038 | 89 | ENSG00000240053 | -0.00087 | 0.00227 | 7.01E-01 | -0.00452 | 0.00186 | 1.53E-02 | 0.00980  | 0.00610 | 1.08E-01 | 0.00048  | 0.00200 | 8.10E-01 | -0.00252 | 0.00423 | 5.52E-01 |
| cg22127773 | 80 | ENSG00000161955 | 0.00020  | 0.00076 | 7.95E-01 | -0.00115 | 0.00157 | 4.63E-01 | -0.00023 | 0.00247 | 9.26E-01 | 0.00077  | 0.00094 | 4.13E-01 | -0.00075 | 0.00543 | 8.91E-01 |
| cg07148038 | 89 | ENSG00000204371 | -0.00007 | 0.00018 | 7.19E-01 | -0.00008 | 0.00026 | 7.49E-01 | 0.00005  | 0.00037 | 9.01E-01 | -0.00001 | 0.00025 | 9.65E-01 | -0.00288 | 0.00155 | 6.30E-02 |
| cg07148038 | 89 | ENSG00000221988 | -0.00073 | 0.00225 | 7.47E-01 | -0.00144 | 0.00411 | 7.26E-01 | 0.00779  | 0.00790 | 3.24E-01 | -0.00165 | 0.00302 | 5.85E-01 | -0.00020 | 0.00873 | 9.82E-01 |
| cg22127773 | 80 | ENSG00000179094 | 0.00009  | 0.00045 | 8.41E-01 | 0.00004  | 0.00070 | 9.51E-01 | 0.00029  | 0.00236 | 9.01E-01 | 0.00007  | 0.00063 | 9.07E-01 | 0.00092  | 0.00282 | 7.43E-01 |
| cg07148038 | 89 | ENSG00000204475 | -0.00102 | 0.00336 | 7.62E-01 | 0.00922  | 0.00535 | 8.51E-02 | -0.00602 | 0.00388 | 1.21E-01 | 0.00165  | 0.00148 | 2.65E-01 | -0.00979 | 0.00544 | 7.21E-02 |
| cg07148038 | 89 | ENSG00000204356 | -0.00045 | 0.00172 | 7.94E-01 | 0.00377  | 0.00448 | 3.99E-01 | -0.01338 | 0.00669 | 4.56E-02 | -0.00044 | 0.00287 | 8.79E-01 | 0.00000  | 0.00060 | 9.98E-01 |
| cg22127773 | 80 | ENSG00000183011 | 0.00003  | 0.00019 | 8.90E-01 | 0.00006  | 0.00019 | 7.61E-01 | 0.00062  | 0.00165 | 7.07E-01 | -0.00125 | 0.00102 | 2.22E-01 | 0.00197  | 0.00419 | 6.37E-01 |
| cg22127773 | 80 | ENSG00000179859 | -0.00002 | 0.00017 | 9.05E-01 | 0.00050  | 0.00045 | 2.63E-01 | -0.00053 | 0.00203 | 7.94E-01 | -0.00012 | 0.00019 | 5.36E-01 | 0.00222  | 0.00290 | 4.44E-01 |
| cg07148038 | 89 | ENSG00000204516 | 0.00013  | 0.00054 | 8.17E-01 | 0.00031  | 0.00188 | 8.68E-01 | -0.00101 | 0.00144 | 4.82E-01 | 0.00026  | 0.00062 | 6.76E-01 | 0.00353  | 0.00480 | 4.62E-01 |
| cg22127773 | 80 | ENSG00000129194 | -0.00009 | 0.00080 | 9.09E-01 | -0.00070 | 0.00117 | 5.49E-01 | -0.00025 | 0.00207 | 9.06E-01 | -0.00013 | 0.00071 | 8.53E-01 | 0.00993  | 0.00519 | 5.57E-02 |
| cg22127773 | 80 | ENSG00000141510 | -0.00002 | 0.00022 | 9.12E-01 | 0.00046  | 0.00026 | 7.59E-02 | -0.00051 | 0.00050 | 3.05E-01 | -0.00018 | 0.00013 | 1.47E-01 | -0.00012 | 0.00077 | 8.72E-01 |
| cg22127773 | 80 | ENSG00000215041 | -0.00003 | 0.00035 | 9.27E-01 | -0.00078 | 0.00136 | 5.63E-01 | 0.00106  | 0.00263 | 6.87E-01 | 0.00005  | 0.00037 | 8.91E-01 | -0.00482 | 0.00363 | 1.85E-01 |
| cg22127773 | 80 | ENSG00000239697 | -0.00003 | 0.00029 | 9.28E-01 | 0.00012  | 0.00032 | 7.15E-01 | 0.00001  | 0.00099 | 9.94E-01 | -0.00163 | 0.00113 | 1.47E-01 | -0.00058 | 0.00172 | 7.37E-01 |
| cg22127773 | 80 | ENSG00000132522 | -0.00004 | 0.00053 | 9.36E-01 | 0.00088  | 0.00102 | 3.92E-01 | 0.00123  | 0.00198 | 5.34E-01 | -0.00043 | 0.00066 | 5.15E-01 | -0.00306 | 0.00312 | 3.26E-01 |
| cg07148038 | 89 | ENSG00000255552 | -0.00041 | 0.00206 | 8.42E-01 | -0.00280 | 0.00664 | 6.73E-01 | -0.00905 | 0.00619 | 1.44E-01 | 0.00116  | 0.00249 | 6.42E-01 | 0.00061  | 0.00609 | 9.20E-01 |
| cg22127773 | 80 | ENSG00000169992 | -0.00004 | 0.00058 | 9.51E-01 | 0.00013  | 0.00110 | 9.04E-01 | 0.00076  | 0.00183 | 6.76E-01 | -0.00033 | 0.00075 | 6.63E-01 | 0.00143  | 0.00327 | 6.62E-01 |
| cg22127773 | 80 | ENSG00000178921 | 0.00004  | 0.00077 | 9.57E-01 | 0.00107  | 0.00161 | 5.06E-01 | 0.00127  | 0.00212 | 5.51E-01 | -0.00044 | 0.00100 | 6.63E-01 | -0.00285 | 0.00390 | 4.64E-01 |
| cg22127773 | 80 | ENSG00000170049 | 0.00003  | 0.00059 | 9.57E-01 | -0.00206 | 0.00222 | 3.52E-01 | 0.00076  | 0.00218 | 7.27E-01 | -0.00003 | 0.00066 | 9.68E-01 | 0.00389  | 0.00308 | 2.06E-01 |
| cg07148038 | 89 | ENSG00000204389 | -0.00097 | 0.00557 | 8.61E-01 | 0.00093  | 0.00466 | 8.42E-01 | 0.00122  | 0.00829 | 8.83E-01 | 0.00888  | 0.00409 | 2.98E-02 | -0.01579 | 0.00552 | 4.20E-03 |
| cg22127773 | 80 | ENSG00000133026 | 0.00001  | 0.00032 | 9.64E-01 | 0.00000  | 0.00038 | 1.00E+00 | 0.00100  | 0.00077 | 1.94E-01 | -0.00056 | 0.00045 | 2.19E-01 | 0.00084  | 0.00115 | 4.64E-01 |
| cg22127773 | 80 | ENSG00000174327 | 0.00005  | 0.00117 | 9.68E-01 | -0.00001 | 0.00038 | 9.76E-01 | 0.00856  | 0.00402 | 3.31E-02 | -0.00126 | 0.00128 | 3.26E-01 | -0.00449 | 0.00625 | 4.72E-01 |
| cg07148038 | 89 | ENSG00000240065 | -0.00038 | 0.00233 | 8.72E-01 | 0.00124  | 0.00124 | 3.19E-01 | 0.00139  | 0.00758 | 8.55E-01 | 0.00371  | 0.00359 | 3.01E-01 | -0.00574 | 0.00231 | 1.30E-02 |
| cg07148038 | 89 | ENSG00000232629 | 0.00034  | 0.00222 | 8.80E-01 | -0.00209 | 0.00633 | 7.41E-01 | 0.00829  | 0.00589 | 1.59E-01 | -0.00237 | 0.00321 | 4.61E-01 | 0.00214  | 0.00439 | 6.27E-01 |
| cg22127773 | 80 | ENSG00000004975 | 0.00000  | 0.00012 | 9.88E-01 | -0.00008 | 0.00024 | 7.43E-01 | -0.00026 | 0.00049 | 6.04E-01 | 0.00007  | 0.00016 | 6.60E-01 | -0.00026 | 0.00071 | 7.11E-01 |
| cg07148038 | 89 | ENSG00000244731 | 0.00052  | 0.00380 | 8.91E-01 | 0.00389  | 0.00148 | 8.57E-03 | 0.01781  | 0.00894 | 4.63E-02 | -0.00474 | 0.00351 | 1.77E-01 | -0.00675 | 0.00438 | 1.23E-01 |

|            |    |                 |          |         |          |          |         |          |          |         |          |          |         |          |          |         |          |
|------------|----|-----------------|----------|---------|----------|----------|---------|----------|----------|---------|----------|----------|---------|----------|----------|---------|----------|
| cg07148038 | 89 | ENSG00000229391 | -0.00043 | 0.00319 | 8.92E-01 | 0.01528  | 0.00670 | 2.26E-02 | -0.00373 | 0.00861 | 6.65E-01 | -0.00394 | 0.00310 | 2.04E-01 | -0.00266 | 0.00200 | 1.83E-01 |
| cg07148038 | 89 | ENSG00000204344 | -0.00046 | 0.00367 | 8.99E-01 | 0.00278  | 0.00582 | 6.33E-01 | -0.00383 | 0.00966 | 6.92E-01 | -0.00656 | 0.00315 | 3.73E-02 | 0.00626  | 0.00456 | 1.70E-01 |
| cg07148038 | 89 | ENSG00000204351 | -0.00008 | 0.00065 | 9.04E-01 | 0.00028  | 0.00051 | 5.79E-01 | -0.00013 | 0.00068 | 8.44E-01 | -0.00074 | 0.00043 | 8.28E-02 | 0.02380  | 0.00867 | 6.05E-03 |
| cg07148038 | 89 | ENSG00000224389 | -0.00018 | 0.00150 | 9.05E-01 | 0.00048  | 0.00171 | 7.76E-01 | -0.00516 | 0.00694 | 4.58E-01 | 0.00024  | 0.00400 | 9.52E-01 | -0.00835 | 0.00737 | 2.57E-01 |
| cg07148038 | 89 | ENSG00000204424 | 0.00028  | 0.00279 | 9.20E-01 | -0.00041 | 0.00345 | 9.06E-01 | -0.00648 | 0.01327 | 6.26E-01 | 0.00225  | 0.00643 | 7.26E-01 | 0.00360  | 0.00828 | 6.64E-01 |
| cg07148038 | 89 | ENSG00000241106 | -0.00013 | 0.00161 | 9.36E-01 | 0.00140  | 0.00414 | 7.36E-01 | -0.01161 | 0.00637 | 6.83E-02 | -0.00073 | 0.00209 | 7.28E-01 | 0.00136  | 0.00157 | 3.88E-01 |
| cg07148038 | 89 | ENSG00000206344 | 0.00010  | 0.00149 | 9.47E-01 | 0.00200  | 0.00564 | 7.23E-01 | -0.01091 | 0.00743 | 1.42E-01 | 0.00404  | 0.00393 | 3.03E-01 | -0.00017 | 0.00107 | 8.73E-01 |
| cg07148038 | 89 | ENSG00000204410 | 0.00003  | 0.00066 | 9.63E-01 | -0.00158 | 0.00228 | 4.88E-01 | 0.00208  | 0.00337 | 5.36E-01 | 0.00011  | 0.00070 | 8.81E-01 | -0.00291 | 0.01155 | 8.01E-01 |
| cg07148038 | 89 | ENSG00000204531 | -0.00008 | 0.00221 | 9.72E-01 | -0.00089 | 0.00361 | 8.04E-01 | -0.00389 | 0.00827 | 6.38E-01 | 0.00023  | 0.00338 | 9.46E-01 | 0.00341  | 0.00615 | 5.80E-01 |
| cg07148038 | 89 | ENSG00000204396 | -0.00023 | 0.00742 | 9.76E-01 | -0.01784 | 0.00940 | 5.77E-02 | 0.02695  | 0.01285 | 3.59E-02 | -0.00902 | 0.00547 | 9.93E-02 | 0.00611  | 0.00509 | 2.30E-01 |
| cg07148038 | 89 | ENSG00000204304 | 0.00002  | 0.00092 | 9.80E-01 | 0.00161  | 0.00163 | 3.23E-01 | -0.00318 | 0.00236 | 1.78E-01 | -0.00034 | 0.00152 | 8.25E-01 | 0.00074  | 0.00233 | 7.52E-01 |
| cg07148038 | 89 | ENSG00000166278 | 0.00000  | 0.00137 | 9.98E-01 | -0.00417 | 0.00328 | 2.03E-01 | -0.00019 | 0.00345 | 9.57E-01 | 0.00039  | 0.00201 | 8.47E-01 | 0.00288  | 0.00305 | 3.45E-01 |

N genes within 2MB indicates number of genes that are tested within 1MB on both sites of the CpG-sites

CpG-sites are ordered based on the Bonferroni-adjusted p-value for the number of genes within 1MB around the CpG-sites

LL: LifeLines Deep

LLS: Leiden Longevity Study

NTR: Netherlands Twin Register

RS: Rotterdam Study
