# Supplementary material for: DNA methylation is associated with lung function in never smokers
Source: Springer Nature journal article supplement (doi:10.1186/s12931-019-1222-8), 2019-12-01
Supplement: MOESM4 [file 17459804]

Online supplement table 4A: Results of the association between 36 top CpG-sites identified from the meta-analysis and environmental exposures.

|            | Gases and fumes |          | Mineral dust |          | Biological dust      |          | Pesticides           |          | Solvents            |          | Environmental tobacco smoke |                 | In utero tobacco smoke |          |
|------------|-----------------|----------|--------------|----------|----------------------|----------|----------------------|----------|---------------------|----------|-----------------------------|-----------------|------------------------|----------|
| cg10012512 | -0.0026         | (0.0021) | -0.0009      | (0.0020) | -0.0019              | (0.0021) | -0.0009              | (0.0031) | 0.0010              | (0.0035) | -0.0034                     | (0.0016)        | -0.0003                | (0.0018) |
| cg02885771 | -0.0043         | (0.0030) | -0.0042      | (0.0028) | -0.0010              | (0.0029) | 0.0037               | (0.0044) | -0.0026             | (0.0052) | 0.0040                      | (0.0022)        | 0.0034                 | (0.0026) |
| cg25105536 | 0.0001          | (0.0006) | 0.0008       | (0.0006) | -0.0012              | (0.0006) | 0.0008               | (0.0009) | 0.0017              | (0.0010) | -0.0004                     | (0.0004)        | 0.0002                 | (0.0005) |
| cg20102034 | 0.0003          | (0.0018) | -0.0010      | (0.0017) | -0.0008              | (0.0017) | 0.0023               | (0.0026) | 0.0047              | (0.0030) | -0.0006                     | (0.0013)        | 5.85E <sup>-6</sup>    | (0.0016) |
| cg03703840 | 0.0008          | (0.0007) | -0.0002      | (0.0006) | 0.0002               | (0.0006) | -0.0010              | (0.0010) | -0.0006             | (0.0011) | 0.0010                      | (0.0005)        | 0.0004                 | (0.0006) |
| cg21614201 | -0.0004         | (0.0019) | -0.0002      | (0.0018) | -0.0026              | (0.0018) | -0.0011              | (0.0028) | -0.0029             | (0.0032) | -0.0022                     | (0.0014)        | -0.0017                | (0.0016) |
| cg07957088 | 0.0023          | (0.0017) | 0.0044       | (0.0015) | 0.0009               | (0.0016) | 0.0003               | (0.0024) | 0.0005              | (0.0028) | 0.0009                      | (0.0012)        | 0.0013                 | (0.0015) |
| cg05304461 | 0.0003          | (0.0008) | 0.0007       | (0.0007) | 0.0004               | (0.0007) | -4.20E <sup>-5</sup> | (0.0011) | 0.0020              | (0.0013) | -7.11E <sup>-5</sup>        | (0.0005)        | 7.58E <sup>-5</sup>    | (0.0006) |
| cg11749902 | 0.0003          | (0.0034) | 0.0013       | (0.0031) | 0.0010               | (0.0032) | -0.0007              | (0.0048) | -0.0035             | (0.0056) | -0.0025                     | (0.0024)        | 0.0025                 | (0.0028) |
| cg02207312 | -0.0008         | (0.0005) | -0.0003      | (0.0005) | 0.0003               | (0.0005) | -0.0002              | (0.0007) | -0.0008             | (0.0008) | 8.95E <sup>-5</sup>         | (0.0004)        | 0.0002                 | (0.0004) |
| cg19734370 | -0.0034         | (0.0069) | 0.0091       | (0.0066) | 0.0100               | (0.0066) | 0.0185               | (0.0100) | -0.0096             | (0.0116) | 0.0058                      | (0.0050)        | -0.0061                | (0.0059) |
| cg03077331 | -0.0101         | (0.0054) | -0.0032      | (0.0052) | -0.0063              | (0.0051) | -0.0027              | (0.0079) | 0.0020              | (0.0090) | 0.0018                      | (0.0039)        | -0.0039                | (0.0046) |
| cg18387671 | 0.0002          | (0.0004) | -0.0004      | (0.0004) | -0.0002              | (0.0004) | -0.0010              | (0.0006) | -0.0005             | (0.0007) | 9.76E <sup>-5</sup>         | (0.0003)        | -0.0006                | (0.0003) |
| cg03224276 | -0.0012         | (0.0014) | 0.0011       | (0.0013) | -0.0013              | (0.0013) | 0.0020               | (0.0020) | -0.0017             | (0.0023) | 0.0005                      | (0.0010)        | -0.0010                | (0.0012) |
| cg02137691 | -0.0020         | (0.0020) | -0.0032      | (0.0019) | -0.0012              | (0.0019) | -0.0035              | (0.0029) | -0.0024             | (0.0034) | 0.0026                      | (0.0015)        | -0.0025                | (0.0018) |
| cg25884324 | 0.0011          | (0.0014) | 0.0014       | (0.0013) | 0.0010               | (0.0013) | -0.0009              | (0.0020) | 0.0016              | (0.0024) | -0.0007                     | (0.0010)        | -0.0026                | (0.0012) |
| cg27158523 | 0.0008          | (0.0011) | -0.0003      | (0.0010) | 0.0009               | (0.0010) | -0.0014              | (0.0016) | -0.0002             | (0.0018) | 0.0002                      | (0.0008)        | -0.0008                | (0.0009) |
| cg01157143 | -0.0002         | (0.0017) | 0.0016       | (0.0017) | -0.0013              | (0.0017) | 0.0027               | (0.0025) | 3.78E <sup>-5</sup> | (0.0029) | -0.0003                     | (0.0013)        | -0.0002                | (0.0015) |
| cg07160694 | 0.0005          | (0.0005) | -0.0002      | (0.0005) | 4.81E <sup>-6</sup>  | (0.0005) | -0.0008              | (0.0007) | 0.0008              | (0.0009) | -0.0001                     | (0.0004)        | 5.54E <sup>-5</sup>    | (0.0004) |
| cg22127773 | 0.0021          | (0.0014) | 0.0014       | (0.0013) | 0.0012               | (0.0013) | 0.0009               | (0.0020) | -0.0004             | (0.0024) | -0.0017                     | (0.0010)        | 0.0013                 | (0.0012) |
| cg20939319 | -0.0008         | (0.0031) | -0.0012      | (0.0030) | -0.0027              | (0.0030) | 0.0023               | (0.0045) | 0.0004              | (0.0053) | -0.0043                     | (0.0023)        | 0.0011                 | (0.0027) |
| cg02206852 | -0.0001         | (0.0016) | 0.0010       | (0.0015) | 0.0012               | (0.0015) | -0.0003              | (0.0023) | -0.0009             | (0.0027) | -0.0028                     | (0.0012)        | -0.0007                | (0.0014) |
| cg17075019 | -0.0016         | (0.0021) | 0.0010       | (0.0020) | 0.0023               | (0.0020) | -1.03E <sup>-5</sup> | (0.0031) | 0.0007              | (0.0035) | 0.0016                      | (0.0015)        | 0.0021                 | (0.0018) |
| cg25556432 | -0.0030         | (0.0029) | -0.0033      | (0.0027) | -0.0034              | (0.0028) | 0.0007               | (0.0042) | -0.0034             | (0.0049) | 0.0024                      | (0.0021)        | -0.0009                | (0.0025) |
| cg22742965 | -0.0011         | (0.0024) | -0.0024      | (0.0023) | -4.99E <sup>-5</sup> | (0.0023) | -0.0027              | (0.0035) | -0.0021             | (0.0041) | -0.0006                     | (0.0018)        | -0.0010                | (0.0021) |
| cg16734845 | -0.0004         | (0.0012) | -0.0005      | (0.0012) | -0.0008              | (0.0012) | -6.4E <sup>-5</sup>  | (0.0018) | 0.0002              | (0.0020) | -0.0015                     | (0.0009)        | 0.0017                 | (0.0011) |
| cg09108394 | 0.0034          | (0.0031) | 0.0058       | (0.0030) | 0.0012               | (0.0030) | 0.0033               | (0.0046) | 6.72E <sup>-5</sup> | (0.0052) | -0.0032                     | (0.0023)        | 0.0024                 | (0.0027) |
| cg10034572 | 0.0039          | (0.0020) | 0.0010       | (0.0019) | -0.0006              | (0.0019) | -0.0021              | (0.0029) | 0.0030              | (0.0033) | 0.0001                      | (0.0014)        | 5.43E <sup>-5</sup>    | (0.0017) |
| cg20066227 | 0.0001          | (0.0015) | 0.0003       | (0.0015) | -2.07E <sup>-6</sup> | (0.0014) | 0.0017               | (0.0022) | 0.0028              | (0.0025) | <b>0.0036</b>               | <b>(0.0011)</b> | 0.0020                 | (0.0013) |
| cg07148038 | -0.0011         | (0.0017) | -0.0014      | (0.0016) | 0.0023               | (0.0016) | 0.0033               | (0.0024) | -0.0010             | (0.0029) | 5.52E <sup>-7</sup>         | (0.0012)        | -0.0006                | (0.0015) |
| cg23396786 | -0.0017         | (0.0036) | 0.0009       | (0.0034) | 0.0006               | (0.0033) | 0.0062               | (0.0051) | 0.0054              | (0.0060) | 0.0016                      | (0.0025)        | -0.0013                | (0.0030) |
| cg06218079 | -0.0062         | (0.0094) | 0.0005       | (0.0089) | -0.0133              | (0.0089) | 0.0067               | (0.0136) | 0.0155              | (0.0159) | 0.0047                      | (0.0068)        | 0.0005                 | (0.0079) |
| cg06982745 | -0.0022         | (0.0015) | -0.0010      | (0.0014) | 0.0018               | (0.0014) | 7.97E <sup>-5</sup>  | (0.0022) | -0.0038             | (0.0025) | -0.0013                     | (0.0011)        | 0.0016                 | (0.0013) |
| cg05946118 | 0.0020          | (0.0040) | 0.0027       | (0.0038) | -0.0040              | (0.0038) | -0.0042              | (0.0058) | -0.0020             | (0.0066) | -0.0038                     | (0.0028)        | 0.0009                 | (0.0034) |
| cg08065963 | 0.0031          | (0.0047) | 0.0023       | (0.0045) | -0.0029              | (0.0045) | -0.0094              | (0.0068) | -0.0030             | (0.0079) | -0.0057                     | (0.0034)        | 0.0057                 | (0.0040) |
| cg12064372 | 0.0014          | (0.0009) | -0.0002      | (0.0009) | 3.99E <sup>-5</sup>  | (0.0008) | -0.0003              | (0.0013) | 0.0016              | (0.0015) | 0.0013                      | (0.0007)        | 0.0002                 | (0.0008) |

Association between DNA methylation and environmental exposures was tested with a robust linear regression model with exposure as categorical variable indicating no exposure versus high exposure. Model was additionally adjusted for age, gender, technical variation and blood cell composition. For all exposures, beta is presented with standard error between brackets. Significant associations ( $p$ -value  $< 0.05/36 = 0.0014$ ) are indicated in bold. Environmental exposures were estimated as described by de Jong et al (Occup Environ Med 2014; 71: 88-96).

Online supplement table 4B: Results of the association between 36 top CpG-sites identified from the meta-analysis and air pollution measurements.

|            | NO <sub>2</sub>      |                 | PM <sub>2.5</sub>   |          | PM <sub>10</sub>    |          | PM <sub>2.5abs</sub> |          |
|------------|----------------------|-----------------|---------------------|----------|---------------------|----------|----------------------|----------|
| cg10012512 | -0.0001              | (0.0003)        | 0.0030              | (0.0032) | 0.0016              | (0.0017) | 0.0050               | (0.0085) |
| cg02885771 | 0.0002               | (0.0004)        | -0.0027             | (0.0045) | -0.0004             | (0.0024) | -0.0075              | (0.0121) |
| cg25105536 | -3.16E <sup>-5</sup> | (0.0001)        | 0.0011              | (0.0009) | 0.0005              | (0.0005) | 0.0022               | (0.0025) |
| cg20102034 | 0.0005               | (0.0002)        | -0.0032             | (0.0027) | -0.0005             | (0.0014) | 0.0008               | (0.0071) |
| cg03703840 | -8.76E <sup>-6</sup> | (0.0001)        | 1.77E <sup>-5</sup> | (0.0009) | -0.0002             | (0.0005) | -0.0019              | (0.0025) |
| cg21614201 | -0.0003              | (0.0003)        | 0.0007              | (0.0030) | -0.0002             | (0.0015) | -0.0005              | (0.0078) |
| cg07957088 | 3.76E <sup>-5</sup>  | (0.0002)        | 0.0002              | (0.0025) | -0.0001             | (0.0013) | 0.0014               | (0.0067) |
| cg05304461 | -0.0002              | (0.0001)        | 8.89E <sup>-5</sup> | (0.0011) | -0.0003             | (0.0006) | -0.0028              | (0.0029) |
| cg11749902 | -0.0010              | (0.0004)        | 0.0064              | (0.0050) | 0.0002              | (0.0026) | -0.0059              | (0.0131) |
| cg02207312 | -6.26E <sup>-5</sup> | (0.0001)        | -0.0010             | (0.0007) | -0.0004             | (0.0004) | -0.0028              | (0.0020) |
| cg19734370 | 0.0002               | (0.0009)        | 0.0064              | (0.0102) | 0.0032              | (0.0053) | 0.0178               | (0.0270) |
| cg03077331 | 0.0005               | (0.0007)        | -0.0127             | (0.0080) | -0.0026             | (0.0042) | -0.0105              | (0.0212) |
| cg18387671 | -0.0001              | (0.0001)        | 0.0007              | (0.0006) | -0.0002             | (0.0003) | -0.0011              | (0.0016) |
| cg03224276 | -6.43E <sup>-5</sup> | (0.0002)        | -0.0031             | (0.0019) | -0.0013             | (0.0010) | -0.0067              | (0.0052) |
| cg02137691 | 0.0001               | (0.0003)        | -0.0044             | (0.0029) | -0.0025             | (0.0015) | -0.0134              | (0.0076) |
| cg25884324 | 0.0003               | (0.0002)        | -0.0019             | (0.0022) | 0.0008              | (0.0012) | 0.0016               | (0.0059) |
| cg27158523 | -5.94E <sup>-5</sup> | (0.0001)        | 0.0007              | (0.0015) | -0.0003             | (0.0008) | -0.0006              | (0.0041) |
| cg01157143 | 0.0003               | (0.0002)        | 0.0012              | (0.0027) | 0.0007              | (0.0014) | 0.0071               | (0.0070) |
| cg07160694 | 4.89E <sup>-5</sup>  | (0.0001)        | 0.0012              | (0.0008) | 0.0002              | (0.0004) | 0.0008               | (0.0021) |
| cg22127773 | -0.0001              | (0.0002)        | 0.0021              | (0.0021) | 0.0011              | (0.0011) | 0.0034               | (0.0056) |
| cg20939319 | -0.0005              | (0.0004)        | 0.0067              | (0.0048) | 0.0029              | (0.0025) | 0.0083               | (0.0127) |
| cg02206852 | -4.09E <sup>-5</sup> | (0.0002)        | 0.0012              | (0.0024) | 9.57E <sup>-5</sup> | (0.0012) | -0.0001              | (0.0063) |
| cg17075019 | 0.0005               | (0.0003)        | -0.0007             | (0.0031) | 0.0003              | (0.0016) | 0.0031               | (0.0081) |
| cg25556432 | 0.0004               | (0.0004)        | -0.0071             | (0.0042) | -0.0015             | (0.0022) | -0.0077              | (0.0111) |
| cg22742965 | <b>-0.0011</b>       | <b>(0.0003)</b> | 0.0014              | (0.0037) | -0.0013             | (0.0019) | -0.0128              | (0.0097) |
| cg16734845 | -9.29E <sup>-5</sup> | (0.0002)        | 0.0019              | (0.0017) | 0.0005              | (0.0009) | 0.0012               | (0.0046) |
| cg09108394 | -0.0008              | (0.0004)        | 0.0089              | (0.0048) | 0.0016              | (0.0025) | -0.0008              | (0.0130) |
| cg10034572 | -0.0003              | (0.0003)        | 0.0006              | (0.0029) | 0.0003              | (0.0015) | -9.99E <sup>-6</sup> | (0.0077) |
| cg20066227 | 6.39E <sup>-5</sup>  | (0.0002)        | -0.0004             | (0.0022) | -0.0003             | (0.0011) | -0.0006              | (0.0058) |
| cg07148038 | 4.91E <sup>-5</sup>  | (0.0002)        | -0.0012             | (0.0025) | 0.0002              | (0.0013) | 0.0030               | (0.0066) |
| cg23396786 | 0.0004               | (0.0005)        | -0.0107             | (0.0051) | -0.0023             | (0.0027) | -0.0080              | (0.0137) |
| cg06218079 | 0.0013               | (0.0013)        | -0.0249             | (0.0144) | -0.0060             | (0.0075) | -0.0241              | (0.0382) |
| cg06982745 | -2.29E <sup>-5</sup> | (0.0002)        | 0.0010              | (0.0021) | -0.0002             | (0.0011) | -0.0008              | (0.0056) |
| cg05946118 | -0.0012              | (0.0005)        | 0.0060              | (0.0059) | -0.0013             | (0.0031) | -0.0130              | (0.0159) |
| cg08065963 | -0.0007              | (0.0006)        | 0.0065              | (0.0072) | 0.0004              | (0.0037) | -0.0077              | (0.0191) |
| cg12064372 | 0.0001               | (0.0001)        | -0.0014             | (0.0014) | 5.76E <sup>-5</sup> | (0.0007) | 0.0012               | (0.0037) |

Association between DNA methylation and air pollution measurements was tested with a robust linear regression model with exposure to the air pollution measurements as continues variable. Model was additionally adjusted for age, gender, technical variation and blood cell composition. For all exposures, beta is presented with standard error between brackets. Significant associations ( $p$ -value  $< 0.05/36 = 0.0014$ ) are indicated in bold. Air pollution was estimated as described by de F C Lichtenfels et al (Environ Health Perspect 2018; 126: 027004). NO<sub>2</sub>: Nitrogen Dioxide; PM<sub>2.5</sub> and PM<sub>10</sub>: particles with an aerodynamic diameter less than 2.5 and 10 μm; PM<sub>2.5abs</sub>: indicator of elemental carbon content.
